# Supplementary material for: Global, regional, and national age-sex-specific mortality for 282 causes of death in 195 countries and territories, 1980–2017: a systematic analysis for the Global Burden of Disease Study 2017
Source: PubMed Central journal article supplement (PMC6227606; doi:10.1016/s0140-6736(18)32203-7), 2018-11-10
Supplement: mmc1.pdf [file mmc1.pdf]

# THE LANCET

## Supplementary appendix 1

This appendix formed part of the original submission and has been peer reviewed. We post it as supplied by the authors.

Supplement to: GBD 2017 Causes of Death Collaborators. Global, regional, and national age-sex-specific mortality for 282 causes of death in 195 countries and territories, 1980–2017: a systematic analysis for the Global Burden of Disease Study 2017. *Lancet* 2018; **392**: 1736–88.

## Appendix to “Global, regional, and national age-sex specific mortality for 282 causes of death, 1980-2017: a systematic analysis for the Global Burden of Disease Study 2017”

This appendix provides further methodological detail, supplemental figures, and more detailed results for “Global, regional, and national age-sex specific mortality for 282 causes of death, 1980-2017: a systematic analysis for the Global Burden of Disease Study 2017.” This appendix is organized into sections that follow the structure of the main paper.

## Preamble

This appendix provides further methodological detail and more detailed results for “Global, regional, and national age-sex specific mortality for 282 causes of death, 1980-2017: a systematic analysis for the Global Burden of Disease Study 2017.” This study complies with the Guidelines for Accurate and Transparent Health Estimates Reporting (GATHER) recommendations. It includes detailed tables and information on data in an effort to maximize transparency in our estimation processes and provide a comprehensive description of analytical steps. We intend this appendix to be a living document, to be updated with each iteration of the Global Burden of Disease Study.

## Table of Contents

|                                                                                                                                                     |     |
|-----------------------------------------------------------------------------------------------------------------------------------------------------|-----|
| Authors' Contributions.....                                                                                                                         | i   |
| Section 1: GBD Overview.....                                                                                                                        | 7   |
| Section 1.1: Locations of the Analysis.....                                                                                                         | 7   |
| Section 1.2: Time Period of the Analysis .....                                                                                                      | 7   |
| Section 1.3: Statement of GATHER Compliance.....                                                                                                    | 7   |
| Section 1.4: List of abbreviations.....                                                                                                             | 7   |
| Section 1.5: GBD results overview.....                                                                                                              | 12  |
| Section 1.6: Data input sources overview.....                                                                                                       | 13  |
| Section 1.7: Funding Sources.....                                                                                                                   | 13  |
| Section 2: GBD 2017 causes of death database.....                                                                                                   | 13  |
| Section 2.1: Background.....                                                                                                                        | 13  |
| Section 2.2: CoD data identification.....                                                                                                           | 13  |
| Section 2.3: Step 1 – Standardise input data.....                                                                                                   | 17  |
| Section 2.4: Step 2 - Map to GBD cause list.....                                                                                                    | 20  |
| Section 2.5: Step 3 – Age-sex splitting.....                                                                                                        | 20  |
| Section 2.6: Step 4-- Correction for miscoding of Alzheimer’s and other dementias, Parkinson’s disease,<br>and atrial fibrillation and flutter..... | 22  |
| Section 2.7: Step 5 - Redistribution.....                                                                                                           | 24  |
| Section 2.8: Step 6 - HIV/AIDS misclassification correction.....                                                                                    | 29  |
| Section 2.9: Step 7 - Scale strata to province.....                                                                                                 | 29  |
| Section 2.10: Step 8 - Restrictions post-redistribution.....                                                                                        | 30  |
| Section 2.11: Step 9 - Drop VR country years or mark as non-representative.....                                                                     | 30  |
| Section 2.12: Step 10 - Cause aggregation.....                                                                                                      | 30  |
| Section 2.13: Step 11 – Remove shocks and HIV/AIDS maternal adjustments.....                                                                        | 31  |
| Section 2.14: Step 12 – Noise Reduction.....                                                                                                        | 35  |
| Section 2.15: Step 13 – CoD database and outlier identification.....                                                                                | 36  |
| Section 2.16: Causes of death data star rating calculation.....                                                                                     | 36  |
| Section 3: Causes of death modeling methods.....                                                                                                    | 38  |
| Section 3.1: CODEm.....                                                                                                                             | 38  |
| Section 3.2: Causes modeled outside of CODEm.....                                                                                                   | 41  |
| Section 3.3: CoD modeling descriptions.....                                                                                                         | 46  |
| Section 4: Central computation.....                                                                                                                 | 359 |
| Section 4.1: Imported cases.....                                                                                                                    | 359 |



|                                                          |     |
|----------------------------------------------------------|-----|
| Section 4.2: CodCorrect .....                            | 359 |
| Section 4.3: Years of life lost (YLLs) calculation ..... | 360 |
| Section 5: SDI Analysis .....                            | 361 |
| Section 5.1: SDI definition .....                        | 361 |
| Section 5.2: Development of revised SDI indicator .....  | 361 |
| Section 6: References .....                              | 363 |
| Section 7: Tables and Figures .....                      | 366 |

## List of Appendix Tables and Figures

### Appendix Figures

|                                                                                                                                                                                                                                                   |     |
|---------------------------------------------------------------------------------------------------------------------------------------------------------------------------------------------------------------------------------------------------|-----|
| <b>Appendix Figure 1.</b> Analytical flowchart for the development of the GBD 2017 causes of death database.....                                                                                                                                  | 366 |
| <b>Appendix Figure 2.</b> GBD 2017 causes of death estimation flowchart.....                                                                                                                                                                      | 367 |
| <b>Appendix Figure 3.</b> Vital Registration and Verbal Autopsy data availability by country, 1980-2017.....                                                                                                                                      | 368 |
| <b>Appendix Figure 4.</b> Percent of vital registration deaths assigned to major garbage codes for all ages by country, 1980-2017.....                                                                                                            | 369 |
| <b>Appendix Figure 5A-B.</b> Classification of national time series of vital registration and verbal autopsy data (A) 1980-2017 and (B) 2010-2017 on the basis of the fraction of deaths well-certified and assigned to a detailed GBD cause..... | 371 |
| <b>Appendix Figure 6A-C.</b> Recoding of Alzheimer’s disease and other dementias, Parkinson’s disease, and atrial fibrillation and flutter for Sweden and Mexico, 1990 to 2017.....                                                               | 373 |
| <b>Appendix Figure 7.</b> Dismod cascade.....                                                                                                                                                                                                     | 379 |

### Appendix Tables

|                                                                                                                                                                                                           |     |
|-----------------------------------------------------------------------------------------------------------------------------------------------------------------------------------------------------------|-----|
| <b>Appendix Table 1.</b> GATHER checklist.....                                                                                                                                                            | 380 |
| <b>Appendix Table 2.</b> GBD 2017 location hierarchy with levels.....                                                                                                                                     | 383 |
| <b>Appendix Table 3.</b> Total number of site years by cause and source type for 2017.....                                                                                                                | 397 |
| <b>Appendix Table 4.</b> List of International Classification of Diseases (ICD) codes mapped to the Global Burden of Disease cause list for causes of death.....                                          | 400 |
| <b>Appendix Table 5.</b> Restrictions on age and sex by cause for GBD 2017.....                                                                                                                           | 408 |
| <b>Appendix Table 6.</b> HIV/AIDS-related garbage code redistribution packages.....                                                                                                                       | 413 |
| <b>Appendix Table 7.</b> Data quality rating from 0 to 5 stars, maximum percent well-certified per 5-year interval and percent well-certified across time series for 195 countries, 1980–2017.....        | 415 |
| <b>Appendix Table 8.</b> Underlying indicators for percent well-certified calculation, based on maximum percent well certified data source in each 5-year time interval for 195 countries, 1980-2017..... | 418 |

|                                                                                                                                       |     |
|---------------------------------------------------------------------------------------------------------------------------------------|-----|
| <b>Appendix Table 9.</b> CODEm covariates used, level of covariate, and expected direction of covariate by cause, sex, and age.....   | 438 |
| <b>Appendix Table 10.</b> Comparison of GBD 2016 and GBD 2017 covariates and level of covariates used in cause of death modeling..... | 551 |
| <b>Appendix Table 11.</b> CODEm predictive validity results by cause, model type, sex, and age.....                                   | 583 |
| <b>Appendix Table 12.</b> Modeling strategy for individual cause of death models in GBD 2017.....                                     | 594 |
| <b>Appendix Table 13.</b> Causes included in the 2017 Global Burden of Disease Study.....                                             | 600 |
| <b>Appendix Table 14.</b> CoDCorrect cause hierarchy with levels.....                                                                 | 609 |
| <b>Appendix Table 15.</b> Percent change after CoDCorrect by cause for all ages, both sexes, 2017.....                                | 615 |
| <b>Appendix Table 16.</b> Theoretical minimum risk reference life table.....                                                          | 624 |
| <b>Appendix Table 17.</b> GBD world population age standard.....                                                                      | 625 |
| <b>Appendix Table 18.</b> Socio-Demographic Index R-squared values with lags up to 10 years.....                                      | 626 |
| <b>Appendix Table 19.</b> Socio-Demographic Index groupings by location, based on 2017 values.....                                    | 627 |
| <b>Appendix Table 20.</b> Socio-Demographic Index values for all estimated GBD 2017 locations, 1980–2017.....                         | 641 |

## Authors' Contributions

### Managing the estimation process

Ashkan Afshin, Tahiya Alam, Molly H Biehl, Brigette F Blacker, Aaron J Cohen, Elizabeth A Cromwell, Lalit Dandona, Rakhi Dandona, Louisa Degenhardt, Samath D Dharmaratne, Daniel Dicker, Valery L Feigin, Christina Fitzmaurice, Nancy Fullman, Simon I Hay, Spencer James, Nicholas J Kassebaum, Hmwe H Kyu, Heidi J Larson, Stephen S Lim, Alan D Lopez, Rafael Lozano, Ashley Marks, Awoke T Misganaw, Ali H Mokdad, Christopher J L Murray, Mohsen Naghavi, Helen E Olsen, D M Pigott, Puja C Rao, Robert C Reiner, Gregory Roth, Joseph S Salama, Katya A Shackelford, Mari Smith, Jeffrey D Stanaway, Caitlyn Steiner, Stein Emil Vollset, Theo Vos, Harvey A Whiteford, Shelley Wilson.

### Writing the first draft of the manuscript

Gregory Roth and Laurie B. Marczak

### Providing data or critical feedback on data sources

Kalkidan Hassen Abate, Solomon Mequanente Abay, Ibrahim Abdollahpour, Rizwan Suliankatchi Abdulkader, Molla Abebe, Semaw Ferede Abera, Laith Abu-Raddad, Manfred Accrombessi, Oladimeji Adebayo, Rufus A. Adedoyin, Olatunji Adetokunboh, Mina Adib, Alireza Ahmadi, Mehdi Ahmadi, Muktar Ahmed, Ibtihel Aichour, Mohammad Esmaeil Akbari, Nadia Akseer, Fares Alahdab, Khurshid Alam, Kefyalew Addis Alene, Syed Mohamed Aljunid, Francois Alla, Peter Allebeck, Rajaa Al-Raddadi, Nelson Alvis-Guzman, Azmeraw T. Amare, Erfan Amini, Walid Ammar, Yaw Ampem Amoako, Catalina Liliana Andrei, Sofia Androudi, Hossein Ansari, Mustafa Ansha, Carl Abelardo Antonio, Olatunde Aremu, Johan Ärnlov, Monika Arora, Al Artaman, Krishna K Aryal, Ephrem Tsegay Asfaw, Suleman Atique, Marcel Ausloos, Ashish Awasthi, Beatriz Paulina Ayala, Rakesh Ayer, Peter Azzopardi, Arefeh Babazadeh, Hamid Badali, Alaa Badawi, Maciej Banach, Kajori Banerjee, Joseph Banoub, Miguel A. Barboza, Till Bärnighausen, Lope Barrero, Sanjay Basu, Bernhard Baune, Habtamu Wondifraw Baynes, Ettore Beghi, Masoud Behzadifar, Meysam Behzadifar, Bayu Begashaw Bekele, Yihalem Abebe Belay, Aminu Bello, Derrick Bennett, Isabela Bensenor, Adam Berman, Eduardo Bernabe, Robert Bernstein, Mircea Beuran, Tina Beyranvand, Suraj Bhattarai, Soumyadeep Bhaumik, Burcu Kucuk Bicer, Boris Bikbov, Ver Bilano, Nigus Bililign, Muhammad Shahdaat Bin, Donal Bisanzio, Luisa Brant, Carol Brayne, Alexandra Brazinova, Gabrielle Britton, Traolach Brughna, Julio Cesar Campuzano, Mate Car, Giulia Carreras, Juan J Carrero, Carlos Castañeda-Orjuela, Franz Castro, Ferrán Catalá-López, Jung-Chen Chang, Fiona Charlson, Peggy Pei-Chia Chiang, Abdulaal Chitheer, Rajiv Chowdhury, Devasahayam Christopher, Sheng-Chia Chung, Flavia Cicuttini, Massimo Cirillo, Paolo Angelo Cortesi, Monica Cortinovia, Ewerton Cousin, Benjamin Cowie, Michael Criqui, John Crump, Matthew Cunningham, Alemneh Kabeta Daba, Abel Dadi, Lalit Dandona, Rakhi Dandona, Anh Kim Dang, Ahmad Daryani, Siddharth Das, José Das Neves, Adrian Davis, Kairat Davletov, Fernando De La, Barthelémy Kuate Defo, Louisa Degenhardt, Gebre Teklemariam Demoz, Kebede Deribe, Nikolaos Dervenis, Samath Dharmaratne, Eric L. Ding, M.Ashworth Dirac, Klara Dokova, David Teye Doku, Pratik Doshi, Kerrie Doyle, Manisha Dubey, Eyasu Ejeta Duken, Bruce Duncan, Hedyeh Ebrahimi, Soheil Ebrahimpour, Anne Elise Eggen, Ziad El-Khatib, Hajer Elkout, Christian Lycke Ellingsen, Matthias Endres, Aman Endries, Benjamin Er, Holly Erskine, Babak Eshrati, Sharareh Eskandarieh, Alireza Esteghamati, Mahdi Fakhari, Hamed Fakhim, Mohammad Fareed, Carla Farinha, Andre Faro, Farshad Farzadfar, Mohammad Hosein Farzaei, Valery Feigin, Andrea B. Feigl, Seyed-Mohammad Fereshtehnejad, Joao Fernandes, Irina Filip, Christina Fitzmaurice, Nataliya Foigt, Takeshi Fukumoto, Nancy Fullman, João M. Furtado, Neal Futran, M.A. Garcia-Gordillo, Tigist Gashaw, Tsegaye

Gebrehiwot, Amanuel Tesfay Gebremedhin, Bereket Gebremichael, Teklu Gebremichael, Tilayie Feto Gelano, Johanna Geleijnse, Ayele Geleto, Ricard Genova-Maleras, Peter Gething, Kebede Embaye Gezae, Mamata Ghimire, Katherine Gibney, Kidu Gidey, Ibrahim Ginawi, Maurice Giroud, Giorgia Giussani, Srinivas Goli, Hector Gomez-Dantes, Sameer Gopalani, Atsushi Goto, Alessandra C Goulart, Ayman Grada, Giuseppe Grosso, Andre Guimaraes, Prakash Gupta, Rahul Gupta, Rajat Das Gupta, Rajeev Gupta, Tanush Gupta, Reyna Alma Gutiérrez, Juanita Haagsma, Nima Hafezi-Nejad, Tekleberhan Beyene Hagos, Arvin Haj-Mirzaian, Arya Haj-Mirzaian, Randah Hamadeh, Hilda Harb, Sivadasanpillai Harikrishnan, Josep Maria Haro, Mehedi Hasan, Hadi Hassankhani, Hamid Y. Hassen, Rasmus Havmoeller, Mohamed Hegazy, Mohsen Heidari, Delia Hendrie, Claudiu Herteliu, Fatemeh Heydarpour, Pouria Heydarpour, Hans Hoek, Michael Hole, Praveen Hoogar, H Dean Hosgood, Mehdi Hosseinzadeh, Mihaela Hostiuc, Sorin Hostiuc, Damian Hoy, Guoqing Hu, Susan Hutfless, Bulat Idrisov, Olayinka Ilesanmi, Usman Iqbal, Farhad Islami, Kathryn H. Jacobsen, Mihajlo Jakovljevic, Spencer James, Don Des Jarlais, Mehdi Javanbakht, Achala Jayatilleke, Panniyammakal Jeemon, Vivekanand Jha, Catherine Johnson, Sarah Johnson, Jost B. Jonas, Bruno Sao Jose, Jacek Jozwiak, Mikk Jürisson, Zubair Kabir, Rajendra Kadel, Amaha Kahsay, Rizwan Kalani, Manoochehr Karami, Corine Karema, Hamidreza Karimi-Sari, Amir Kasaeian, Getachew Mullu Kassa, Nicholas J Kassebaum, Srinivasa Vittal Katikireddi, Anil Kaul, Dhruv Kazi, Peter Keiyoro, Andrei Keren, Chandrasekharan Nair Kesavachandran, Yousef Khader, Behzad Khafaie, Behzad Khafaie, Morteza Abdullatif Khafaie, Ibrahim Khalil, Young-Ho Khang, Mona Khater, Abdullah T. Khoja, Ardeshir Khosravi, Mohammad Hossein Khosravi, Jagdish Khubchandani, Aliasghar A Kiadaliri, Daniel Kim, Young-Eun Kim, Yun Jin Kim, Adnan Kisa, Mika Kivimaki, Ann Kristin Knudsen, Jonathan Kocarnik, Sonali Kochhar, Parvaiz Koul, Michael Kravchenko, Kewal Krishan, G Anil Kumar, Pushpendra Kumar, Michael Kutz, Ihor Kuzin, Deepesh P. Lad, Sheetal D. Lad, Alessandra Lafranconi, Dharmesh Lal, Van Lansingh, James Leigh, Yichong Li, Juan Liang, Lee-Ling Lim, Shiwei Liu, Alan Lopez, Stefan Lorkowski, Paulo Lotufo, Stefan Ma, Eryln Rachele Macarayan, Mark Mackay, Jennifer Maclachlan, Dhaval Maghavani, P A Mahesh, Marek Majdan, Reza Majdzadeh, Reza Malekzadeh, Deborah Carvalho Malta, Mohammedaman Mama, Mohammad Ali Mansournia, Joemer Maravilla, Guy Marks, Francisco Rogerlândio Martins-Melo, Melvin Marzan, Joseph Masci, Benjamin Massenburg, Manu Mathur, Richard Matzopoulos, Mohsen Mazidi, Colm Mcalinden, John Mcgrath, Man Mohan Mehndiratta, Varshil Mehta, Addisu Melese, Peter Memiah, Walter Mendoza, Getnet Mengistu, Zerihun Menkalew, Atte Meretoja, Tuomo Meretoja, Tomislav Mestrovic, Haftay Berhane Mezgebe, Bartosz Miazgowski, Tomasz Miazgowski, Milena Santric Milicevic, Ted R Miller, Parvaneh Mirabi, Erkin Mirrahimov, Babak Moazen, Karzan Mohammad, Moslem Mohammadi, Shafiu Mohammed, Viswanathan Mohan, Ali Mokdad, Lorenzo Monasta, Ghobad Moradi, Maziar Moradi-Lakeh, Mehdi Moradinazar, Lidia Morawska, Joana Morgado-Da-Costa, Marilita Moschos, Seyyed Meysam Mousavi, Kindie Fentahun Muchie, Ulrich Mueller, Kamarul Imran Musa, Ghulam Mustafa, Jean Nachega, Gabriele Nagel, Seyed Sina Naghibi, Sanjeev Nair, Luigi Naldi, Hae-Sung Nam, Bruno Nascimento, Ionut Negoii, Ruxandra Irina Negoii, Charles Newton, Frida Ngalesoni, Josephine Ngunjiri, Huong Nguyen, Long Hoang Nguyen, Trang Huyen Nguyen, Shuhei Nomura, Mehdi Noroozi, Bo Norrving, Jean Jacques Noubiap, Hamid Reza Nouri, Malihe Nourollahpour, Mohammad Reza Nowroozi, Christopher Odell, Felix Ogbo, Olanrewaju Oladimeji, Andrew T. Olagunju, Bolajoko Olusanya, Jacob Olusanya, Sokking Ong, Heather Orpana, Alberto Ortiz, Stanislav Otstavnov, Simon Øverland, Mayowa Owolabi, Raziye Özdemir, Smita Pakhale, Adrian Pana, Songhomitra Panda-Jonas, Andrea Parisi, Shanti Patel, Alexandre Pereira, David Pereira, Norberto Perico, Max Petzold, Frédéric Piel, David Pigott, Farhad Pishgar, Suzanne Polinder, Maarten Postma, Hossein Poustchi, Swayam Prakash, Ashwini Pujar, Mostafa Qorbani, D. Alex Quistberg, Anh Nguyen Quynh, Enayatollah Homaie Rad, Kirankumar Rade, Amir

Radfar, Anwar Rafay, Fakher Rahim, Afarin Rahimi-Movaghar, Mahfuzar Rahman, Rajesh Kumar Rai, Sasa Rajsic, Usha Ram, Chhabi Lal Ranabhat, PATURI RAO, David Rawaf, Salman Rawaf, Kolli Srinath Reddy, Giuseppe Remuzzi, Andre Renzaho, Shahab Rezaeian, Antonio Luiz Ribeiro, Aklilu Abrham Roba, Kedir Teji Roba, Leonardo Roever, Luca Ronfani, Gholamreza Roshandel, Ali Rostami, Gregory Roth, Dietrich Rothenbacher, Ambuj Roy, Enrico Rubagotti, Basema Saddik, Ehsan Sadeghi, Hosein Safari, Saeid Safiri, Mohammad Ali Sahraian, Nasir Salam, Payman Salamati, Yahya Salimi, Inbal Weiss Salz, Evanson Z Sambala, Abdallah M. Samy, Juan Sanabria, Diego Augusto Santos, João Vasco Santos, Muthupandian Saravanan, Abdur Razzaque Sarker, Rodrigo Sarmiento-Suárez, Nizal Sarrafzadegan, Benn Sartorius, Maheswar Satpathy, Monika Sawhney, Sonia Saxena, Mehdi Sayyah, Elke Schaeffner, David C Schwebel, Falk Schwendicke, Mario Šekerija, Sadaf Sepanlou, Edson Serván-Mori, Seyedmojtaba Seyedmousavi, Mehdi Shahbazi, Amira Shaheen, Masood Ali Shaikh, Mehran Shams-Beyranvand, Mehdi Sharif, Mahdi Sharif-Alhoseini, Sheikh Mohammed Shariful, Jun She, Aziz Sheikh, Peilin Shi, Ivy Shiue, Farhad Shokraneh, Si Si, Soraya Siabani, Dayane Silveira, Jasvinder Singh, Prashant Kumar Singh, Virendra Singh, Dhirendra N. Sinha, Mekonnen Sisay, Karen Sliwa, Soheila Sobhani, Eugene Sobngwi, Joan B Soriano, Luciano Sposato, Chandrashekhar T Sreeramareddy, Vasiliki Stathopoulou, Mark Stokes, Agus Sudaryanto, Muawiyah Babale Sufiyan, Ipsita Sutradhar, Bryan L. Sykes, Dillon Sylte, Cassandra Szoeko, Rafael Tabarés-Seisdesdos, Mesfin Tadese, Nuno Taveira, Awoke Temesgen, Mohamad-Hani Temsah, Omar Temsah, Abdullah Terkawi, Belay Tessema, Nihal Thomas, Ha Nguyen Thu, Ruoyan Tobe-Gai, Marcello Tonelli, Miguel Tortajada-Girbés, Mathilde Touvier, Marcos Roberto Tovani-Palone, Bach Tran, Khanh Bao Tran, Christopher Troeger, Thomas Truelsen, Nu Thi Truong, Kingsley Nnanna Ukwaja, Irfan Ullah, Eduardo Undurraga, Mohammad Hifz Ur, Olalekan Uthman, Muthiah Vaduganathan, Afsane Vaezi, Gaurang Vaidya, Pascual Valdez, Tommi Vasankari, Ilais Moreno Velasquez, Narayanaswamy Venketasubramanian, Sergey Vladimirov, Vasilij Vlassov, Stein Emil Vollset, Theo Vos, Fasil Wagnew, Yasir Waheed, Judd Walson, Yanping Wang, Yuan-Pang Wang, Elisabete Weiderpass, Robert Weintraub, Andrea Werdecker, Ronny Westerman, Harvey Whiteford, Justyna Widecka, Charles Shey Wiysonge, Charles Wolfe, Shouling Wu, Yun-Chun Wu, Grant Wyper, Denis Xavier, Gelin Xu, Ali Yadollahpour, Hossein Yahyazadeh, Bereket Yakob, Lijing Yan, Mehdi Yaseri, Yasin Jemal Yasin, Alex Yeshaneh, Alex Yeshanen, Manaye Yihune, Ebrahim M. Yimer, Biruck Desalegn Yirsaw, Naohiro Yonemoto, Marcel Yotebieng, Mustafa Younis, Vesna Zadnik, Zoubida Zaidi, Sojib Bin Zaman, Mohammad Zamani, Zohrah Zare, Kai Zhang, Sanjay Zodpey, and Liesl Zuhlke.

#### [Developing methods or computational machinery](#)

Ibrahim Abdollahpour, Rufus A. Adedoyin, Mehdi Ahmadi, Marlana Bannick, Donal Bisanzio, Fiona Charlson, Yilma Chisha, Devasahayam Christopher, Matthew Cunningham, Ahmad Daryani, Daniel Dicker, Hamed Fakhim, Farshad Farzadfar, Samuel Finegold, Christina Fitzmaurice, Kyle Foreman, Tahvi Frank, Segen G Meskel, Bereket Gebremichael, Ayele Geleto, Taren Gorman, Mehdi Hosseinzadeh, Kathy Jenkins, Catherine Johnson, Sarah Johnson, Nicholas J Kassebaum, Muhammad Shahzeb Khan, Adnan Kisa, Michael Kutz, Van Lansingh, Kathryn Lau, James Leigh, Tefera Chane Mekonnen, Zerihun Menlkalew, Grant Nguyen, Emma Nichols, Bolajoko Olusanya, Jacob Olusanya, Charles Parry, Chhabi Lal Ranabhat, Robert Reiner, Seyed Mohammad Riahi, Gregory Roth, Abdallah M. Samy, Shahabeddin Sarvi, David C Schwebel, Mehdi Sharif, Tariq Jamal Siddiqi, Virendra Singh, Dhirendra N. Sinha, Jeffrey Stanaway, Leo Stewart, Patrick Sur, Ipsita Sutradhar, Dillon Sylte, Andrew Theis, Christopher Troeger, Derrick Tsoi, Rachel L. Updike, Muhammad Shariq Usman, Theo Vos, Shadrach Wilson, Hossein Yahyazadeh, Lijing Yan, and Naohiro Yonemoto.

### Applying analytical methods to produce estimates

Muhammed Magdy Abd, Haftom Abebe, Rufus A. Adedoyin, Kareha Agesa, Sutapa Agrawal, Mehdi Ahmadi, Azmeraw T. Amare, Olatunde Aremu, Amit Arora, Hamid Badali, Katherine Ballesteros, Marlena Bannick, Habtamu Wondifraw Baynes, Bayu Begashaw Bekele, Gregory Bertolacci, Donal Bisanzio, Charlton Callender, Chris Castle, Fiona Charlson, Elizabeth Cromwell, Matthew Cunningham, Anh Kim Dang, Ahmad Daryani, Barthelemy Kuate Defo, Getenet Dessie, Daniel Dicker, M.Ashworth Dirac, Maysaa El Sayed Zaki, Christian Lycke Ellingsen, Aman Endries, Holly Erskine, Mohammad Fareed, Samuel Finegold, Christina Fitzmaurice, Tahvi Frank, William Gardner, Teklu Gebremichael, Ayele Geleto, Gessesew Bugssa Hailu, Hamid Y. Hassen, Thomas Hsiao, Caleb Irvine, Spencer James, Catherine Johnson, Sarah Johnson, Manoochehr Karami, André Karch, Nicholas J Kassebaum, Behzad Khafaie, Ibrahim Khalil, Young-Eun Kim, Yun Jin Kim, Adnan Kisa, Jonathan Kocarnik, Michael Kutz, Hmwe Kyu, Van Lansingh, Kathryn Lau, Shai Linn, Helena Manguerra, Ira Martopullo, Melvin Marzan, Tefera Chane Mekonnen, Anoushka Millear, Shafiu Mohammed, Ali Mokdad, John Everett Mumford, Grant Nguyen, Long Hoang Nguyen, Emma Nichols, In-Hwan Oh, Bolajoko Olusanya, Jacob Olusanya, Katherine Paulson, David Pigott, Caroline Purcell, Chhabi Lal Ranabhat, Marissa Reitsma, Seyed Mohammad Riahi, Aklilu Abrham Roba, Nicholas Roberts, Gregory Roth, Sundeep Salvi, Inbal Weiss Salz, Abdallah M. Samy, Damian Santomauro, Seyedmojtaba Seyedmousavi, Masood Ali Shaikh, Mehdi Sharif, Virendra Singh, Mari Smith, Chandrashekhar T Sreeramareddy, Vinay Srinivasan, Jeffrey Stanaway, Leo Stewart, Patrick Sur, Dillon Sylte, Tamirat Tesfaye, Andrew Theis, Bach Tran, Khanh Bao Tran, Christopher Troeger, Nu Thi Truong, Derrick Tsoi, Irfan Ullah, Rachel L. Updike, Theo Vos, Mitchell Wallin, Adhena A. Werkneh, Ronny Westerman, Lauren Wilner, Shadrach Wilson, Simon Yadgir, Paul Yip, Biruck Desalegn Yirsaw, Seok-Jun Yoon, Mustafa Younis, and Chuanhua Yu.

### Providing critical feedback on methods or results

Degu Abate, Kalkidan Hassen Abate, Solomon Mequanente Abay, Cristiana Abbafati, Nooshin Abbasi, Hedayat Abbastabar, Foad Abd-Allah, Jemal Abdela, Ibrahim Abdollahpour, Rizwan Suliankatchi Abdulkader, Haftom Abebe, Molla Abebe, Zegeye Abebe, Semaw Ferede Abera, Haftom Abraha, Dilaram Acharya, Abdu Adamu, Oladimeji Adebayo, Rufus A. Adedoyin, Victor Adekanmbi, Olatunji Adetokunboh, Mina Adib, Ashkan Afshin, Gina Agarwal, Anurag Agrawal, Sutapa Agrawal, Mehdi Ahmadi, Muktar Ahmed, Sayem Ahmed, Amani Nidhal Aichour, Ibtihel Aichour, Mohammad Esmaeil Akbari, Nadia Akseer, Fares Alahdab, Ziyad Al-Aly, Khurshid Alam, Tahiya Alam, Animut Alebel, Kefyalew Addis Alene, Ayman Al-Eyadhy, Mehran Alijanzadeh, Reza Alizadeh-Navaei, Syed Mohamed Aljunid, Ala'a Alkerwi, Peter Allebeck, Jordi Alonso, Rajaa Al-Raddadi, Khalid Altirkawi, Nelson Alvis-Guzman, Azmeraw T. Amare, Leopold N. Aminde, Erfan Amini, Walid Ammar, Yaw Ampem Amoako, Catalina Liliana Andrei, Sofia Androudi, Dina Nur Anggraini, Mina Anjomshoa, Hossein Ansari, Mustafa Ansha, Carl Abelardo Antonio, Palwasha Anwari, Olatunde Aremu, Johan Ärnlöv, Amit Arora, Al Artaman, Krishna K Aryal, Hamid Asayesh, Ephrem Tsegay Asfaw, Zerihun Ataro, Suleman Atique, Sachin Atre, Marcel Ausloos, Euripide Avokpaho, Ashish Awasthi, Beatriz Paulina Ayala, Rakesh Ayer, Peter Azzopardi, Arefeh Babazadeh, Umar Bacha, Alaa Badawi, Katherine Ballesteros, Kajori Banerjee, Joseph Banoub, Miguel A. Barboza, Suzanne Barker-Collo, Till Bärnighausen, Simon Barquera, Lope Barrero, Quique Bassat, Sanjay Basu, Bernhard Baune, Habtamu Wondifraw Baynes, Shahrzad Bazargan-Hejazi, Neeraj Bedi, Ettore Beghi, Meysam Behzadifar, Yannick Béjot, Abate Bekele, Bayu Begashaw Bekele, Ezra Belay, Yihalem Abebe Belay, Michelle Bell, Aminu Bello, Derrick Bennett, Isabela Bensenor, Adam Berman, Eduardo Bernabe, Robert Bernstein, Mircea Beuran, Tina Beyranvand, Ashish Bhalla, Suraj Bhattarai, Soumyadeep Bhaumik, Zulfiqar Bhutta, Belete Biadgo, Burcu Kucuk Bicer, Ali Bijani, Boris Bikbov, Ver

Bilano, Nigus Bililign, Muhammad Shahdaat Bin, Tuhin Biswas, Brigitte Blacker, Rohan Borschmann, Cristina Bosetti, Kayvan Bozorgmehr, Oliver Brady, Luisa Brant, Nicholas Breitborde, Hermann Brenner, Traolach Brugha, Reinhard Busse, Zahid Butt, Ismael Campos-Nonato, Jorge Cano, Lorraine Tudor Car, Mate Car, Rosario Cárdenas, Juan J Carrero, Felix Carvalho, Carlos Castañeda-Orjuela, Clara Castro, Franz Castro, Ferrán Catalá-López, Ester Cerin, Jung-Chen Chang, Fiona Charlson, Pankaj Chaturvedi, Peggy Pei-Chia Chiang, Odgerel Chimed-Ochir, Yilma Chisha, Vesper Chisumpa, Hanne Christensen, Devasahayam Christopher, Sheng-Chia Chung, Flavia Cicuttini, Liliana G Ciobanu, Aaron Cohen, Paolo Angelo Cortesi, Monica Cortinovis, Ewerton Cousin, Benjamin Cowie, Michael Criqui, Christopher Crowe, John Crump, Matthew Cunningham, Alemneh Kabeta Daba, Lalit Dandona, Rakhi Dandona, Anh Kim Dang, Paul I Dargan, Ahmad Daryani, José Das Neves, Adrian Davis, Dragos Davitoiu, Fernando De La, Megbaru Debalkie, Barthelemy Kuate Defo, Louisa Degenhardt, Tizta Degfie, Getiye Dejenu, Gebre Teklemariam Demoz, Balem Demtsu, Edgar Denova-Gutiérrez, Kebede Deribe, Nikolaos Dervenis, Subhojit Dey, Samath Dharmaratne, Daniel Dicker, Eric L. Ding, M.Ashworth Dirac, Shirin Djalalinia, Klara Dokova, David Teye Doku, Christl Donnelly, E. Ray Dorsey, Kerrie Doyle, Tim Driscoll, Manisha Dubey, Eleonora Dubljanin, Eyasu Ejeta Duken, Bruce Duncan, Hedyeh Ebrahimi, Soheil Ebrahimpour, Miloud Taki Eddine, Dumessa Edessa, David Edvardsson, Anne Elise Eggen, Maysaa El Sayed Zaki, Ziad El-Khatib, Christian Lycke Ellingsen, Matthias Endres, Aman Endries, Holly Erskine, Babak Eshрати, Sharareh Eskandarieh, Alireza Esteghamati, Hamed Fakhim, Khalil Ghasemi Falavarjani, Mahbobeh Faramarzi, Farzaneh Farhadi, Carla Farinha, Andre Faro, Farshad Farzadfar, Mohammad Hosein Farzaei, Valery Feigin, Andrea B. Feigl, Netsanet Fentahun, Seyed-Mohammad Fereshtehnejad, Eduarda Fernandes, Joao Fernandes, Garumma Tolu Feyissa, Irina Filip, Samuel Finegold, Florian Fischer, Nataliya Foigt, Kyle Foreman, Carla Fornari, Takeshi Fukumoto, Nancy Fullman, Thomas Fürst, João M. Furtado, Neal Futran, Segen G Meskel, Silvano Gallus, Alberto L. García-Basteiro, Tigist Gashaw, Abadi Kahsu Gebre, Tsegaye Gebrehiwot, Amanuel Tesfay Gebremedhin, Merhawi Gebremedhin, Afewerki Gebremeskel, Bereket Gebremichael, Tilayie Feto Gelano, Johanna Geleijnse, Ayele Geleto, Ricard Genova-Maleras, Kebede Embaye Gezae, Reza Ghadimi, Maryam Ghasemi-Kasman, Mamata Ghimire, Katherine Gibney, Kidu Gidey, Paramjit Gill, Tiffany Gill, Richard Gillum, Meaza Girma, Giorgia Giussani, Srinivas Goli, Philimon Gona, Sameer Gopalani, Taren Gorman, Alessandra C Goulart, Ayman Grada, Giuseppe Grosso, Harish Gugnani, Andre Guimaraes, Rahul Gupta, Rajat Das Gupta, Rajeev Gupta, Tanush Gupta, Reyna Alma Gutiérrez, Bishal Gyawali, Juanita Haagsma, Nima Hafezi-Nejad, Tekleberhan Beyene Hagos, Dessalegn Haile, Gessesew Bugssa Hailu, Arvin Haj-Mirzaian, Arya Haj-Mirzaian, Randah Hamadeh, Samer Hamidi, Alexis Handal, Graeme Hankey, Hilda Harb, Sivadasanpillai Harikrishnan, Josep Maria Haro, Mehedi Hasan, Hadi Hassankhani, Hamid Y. Hassen, Rasmus Havmoeller, Roderick Hay, Simon Hay, Akbar Hedayatizadeh-Omran, Mohamed Hegazy, Behzad Heibati, Mohsen Heidari, Delia Hendrie, Claudiu Herteliu, Fatemeh Heydarpour, Sousan Heydarpour, Desalegn Hibstu, Michael Hole, Praveen Hoogar, H Dean Hosgood, Mostafa Hosseini, Mihaela Hostiuc, Sorin Hostiuc, Peter Hotez, Guoqing Hu, Susan Hutfless, Olayinka Ilesanmi, Usman Iqbal, Nazrul Islam, Farhad Islami, Kathryn H. Jacobsen, Nader Jahanmehr, Sudhir Kumar Jain, Mihajlo Jakovljevic, Moti Jalu, Spencer James, Don Des Jarlais, Mehdi Javanbakht, Achala Jayatilleke, Panniyammakal Jeemon, Ravi Prakash Jha, Vivekanand Jha, Catherine Johnson, Sarah Johnson, Jost B. Jonas, Bruno Sao Jose, Ankur Joshi, Jacek Jozwiak, Suresh Jungari, Mikko Jürisson, Zubair Kabir, Rajendra Kadel, Amaha Kahsay, Rizwan Kalani, Manoochehr Karami, André Karch, Hamidreza Karimi-Sari, Ali Kazemi Karyani, Amir Kasaeian, Getachew Mullu Kassa, Tesfaye Kassa, Nicholas J Kassebaum, Srinivasa Vittal Katikireddi, Dhruv Kazi, Adane Kefale, Peter Keiyoro, Andre Pascal Kengne, Chandrasekharan Nair Kesavachandran, Yousef Khader, Behzad Khafaie, Morteza Abdullatif



Khafaie, Nauman Khalid, Ibrahim Khalil, Ejaz Khan, Muhammad Shahzeb Khan, Muhammad Ali Khan, Young-Ho Khang, Mona Khater, Abdullah T. Khoja, Mohammad Hossein Khosravi, Jagdish Khubchandani, Aliasghar A Kiadaliri, Daniel Kim, Young-Eun Kim, Yun Jin Kim, Ruth Kimokoti, Yohannes Kinfu, Adnan Kisa, Katarzyna Kissimova-Skarbek, Mika Kivimaki, Ann Kristin Knudsen, Jonathan Kocarnik, Sonali Kochhar, Yoshihiro Kokubo, Jacek Kopec, Parvaiz Koul, Ai Koyanagi, G Anil Kumar, Manasi Kumar, Pushpendra Kumar, Michael Kutz, Hmwe Kyu, Deepesh P. Lad, Sheetal D. Lad, Alessandra Lafranconi, Dharmesh Lal, Ratilal Laloo, Tea Lallukka, Jennifer Lam, Faris Lami, Van Lansingh, Heidi Larson, Arman Latifi, Jeffrey Lazarus, Paul Lee, James Leigh, Cheru T Leshargie, Shanshan Li, Lee-Ling Lim, Miteku Limenih, Shai Linn, Shiwei Liu, Yang Liu, Rakesh Lodha, Chris Lonsdale, Alan Lopez, Stefan Lorkowski, Paulo Lotufo, Raimundas Lunevicius, Eryln Rachele Macarayan, Mark Mackay, Jennifer Maclachlan, Fabiana Madotto, Hassan Magdy Abd, P A Mahesh, Marek Majdan, Reza Majdzadeh, Azeem Majeed, Reza Malekzadeh, Deborah Carvalho Malta, Mohammedaman Mama, Ana Laura Manda, Luiz Garcia Mandarano-Filho, Mohammad Ali Mansournia, Christopher Chabila Mapoma, Dadi Marami, Joemer Maravilla, Wagner Marcenes, Guy Marks, Gabriel Martinez, Francisco Rogerlândio Martins-Melo, Ira Martopullo, Winfried März, Melvin Marzan, Benjamin Massenburg, Manu Mathur, Prashant Mathur, Richard Matzopoulos, Pallab K Maulik, Mohsen Mazidi, Colm Mcalinden, John Mcgrath, Martin Mckee, Brian McMahan, Suresh Mehata, Kala M. Mehta, Varshil Mehta, Tefera Chane Mekonnen, Addisu Melese, Mulugeta Melku, Peter Memiah, Ziad Memish, Walter Mendoza, Desalegn Tadesse Mengistu, Getnet Mengistu, Zerihun Menkalew, George Mensah, Beyene Meressa, Seid Tiku Mereta, Atte Meretoja, Tuomo Meretoja, Tomislav Mestrovic, Haftay Berhane Mezgebe, Bartosz Miazgowski, Tomasz Miazgowski, Milena Santric Milicevic, Ted R Miller, Molly Miller-Petrie, GK Mini, Mojde Mirarefin, Andreea Mirica, Erkin Mirrakhimov, Habtamu Mitiku, Babak Moazen, Moslem Mohammadi, Noushin Mohammadifard, Mohammed Mohammed, Shafiu Mohammed, Ali Mokdad, Mariam Molokhia, Lorenzo Monasta, Ghobad Moradi, Maziar Moradi-Lakeh, Mehdi Moradinazar, Paula Moraga, Lidia Morawska, Joana Morgado-Da-Costa, Shane Morrison, Marilita Moschos, Seyyed Meysam Mousavi, Kindie Fentahun Muchie, Ulrich Mueller, Satinath Mukhopadhyay, Jonah Musa, Kamarul Imran Musa, Ghulam Mustafa, Jean Nachega, Gabriele Nagel, Seyed Sina Naghbi, Aliya Naheed, Azin Nahvijou, Gurudatta Naik, Sanjeev Nair, Farid Najafi, Vinay Nangia, Jobert Richie Nansseu, Bruno Nascimento, Bruce Neal, Ayenew Negesse, Ionut Negoii, Ruxandra Irina Negoii, Subas Neupane, Jan-Walter De Neve, Frida Ngalesoni, Josephine Ngunjiri, Grant Nguyen, Long Hoang Nguyen, Trang Huyen Nguyen, Emma Nichols, Nomonde Nolutshungu, Ole Norheim, Mehdi Noroozi, Bo Norrving, Jean Jacques Noubiap, Hamid Reza Nouri, Malihe Nourollahpour, Peter Nyasulu, Richard Ofori-Asenso, Felix Ogbo, In-Hwan Oh, Olanrewaju Oladimeji, Andrew T. Olagunju, Pedro Olivares, Helen Olsen, Bolajoko Olusanya, Jacob Olusanya, Eyal Oren, Heather Orpana, Alberto Ortiz, Justin R Ortiz, Stanislav Otstavnov, Simon Øverland, Mayowa Owolabi, Rosana Pacella, Smita Pakhale, Abhijit Pakhare, Amir Pakpour, Adrian Pana, Songhomitra Panda-Jonas, Jeyaraj Pandian, Eun-Kee Park, Charles Parry, Hadi Parsian, Shanti Patel, Sanghamitra Pati, George Patton, Alexandre Pereira, David Pereira, Norberto Perico, Michael R. Phillips, Frédéric Piel, David Pigott, Julian Pillay, Meghdad Pirsahab, Farhad Pishgar, Suzanne Polinder, Maarten Postma, Akram Pourshams, Hossein Poustchi, Swayam Prakash, Narayan Prasad, Ashwini Pujar, Mostafa Qorbani, D. Alex Quistberg, Enayatollah Homaie Rad, Amir Radfar, Anwar Rafay, Alireza Rafiei, Fakher Rahim, Kazem Rahimi, Afarin Rahimi-Movaghar, Mahfuzar Rahman, Muhammad Aziz Rahman, Rajesh Kumar Rai, Usha Ram, Chhabi Lal Ranabhat, Prabhat Ranjan, David Rawaf, Salman Rawaf, Christian Razo, Kolli Srinath Reddy, Robert Reiner, Marissa Reitsma, Giuseppe Remuzzi, Andre Renzaho, Serge Resnikoff, Shahab Rezaeian, Mohammad Sadegh Rezi, Seyed Mohammad Riahi, Antonio Luiz Ribeiro, Maria Jesus

Rios-Blancas, Jacqueline Castillo Rivas, Aklilu Abrham Roba, Nicholas Roberts, Stephen Robinson, Leonardo Roever, Luca Ronfani, Gholamreza Roshandel, Ali Rostami, Gregory Roth, Dietrich Rothenbacher, Ambuj Roy, Perminder Sachdev, Basema Saddik, Ehsan Sadeghi, Hosein Safari, Mahdi Safdarian, Saeid Safiri, Rajesh Sagar, Amirhossein Sahebkar, Mohammad Ali Sahraian, Nasir Salam, Joseph Salama, Raphael Saldanha, Zikria Saleem, Yahya Salimi, Inbal Weiss Salz, Evanson Z Sambala, Abdallah M. Samy, Juan Sanabria, Maria Dolores Sanchez-Niño, Diego Augusto Santos, Itamar Santos, João Vasco Santos, Muthupandian Saravanan, Abdur Razzaque Sarker, Rodrigo Sarmiento-Suárez, Benn Sartorius, Brijesh Sathian, Thirunavukkarasu Sathish, Maheswar Satpathy, Arundhati Sawant, Monika Sawhney, Sonia Saxena, Mehdi Sayyah, Elke Schaeffner, Ione Schneider, Ben Schöttker, Aletta Schutte, David C Schwebel, Falk Schwendicke, James Scott, Sadaf Sepanlou, Edson Serván-Mori, Seyedmojtaba Seyedmousavi, Hosein Shabaninejad, Azadeh Shafieesabet, Mehdi Shahbazi, Amira Shaheen, Masood Ali Shaikh, Mehran Shams-Beyranvand, Mohammad Bagher Shamsi, Kiomars Sharafi, Mehdi Sharif, Sheikh Mohammed Shariful, Rajesh Sharma, Jun She, Aziz Sheikh, Mika Shigematsu, Rahman Shiri, Ivy Shiue, Mark Shrime, Si Si, Soraya Siabani, Tariq Jamal Siddiqi, Inga Dora Sigfusdottir, Rannveig Sigurvinsdottir, Donald Silberberg, Dayane Silveira, Jasvinder Singh, Narinder Pal Singh, Prashant Kumar Singh, Virendra Singh, Mekonnen Sisay, Badr Sobaih, Soheila Sobhani, Eugene Sobngwi, Samir Soneji, Moslem Soofi, Reed Sorensen, Joan B Soriano, Ireneous Soyiri, Luciano Sposato, Chandrashekhar T Sreeramareddy, Jeffrey Stanaway, Dan J Stein, Mark Stokes, Muawiyah Babale Sufiyan, Ipsita Sutradhar, Bryan L. Sykes, PN Sylaja, Dillon Sylte, Cassandra Szoeki, Rafael Tabarés-Seisdesdos, Takahiro TABUCHI, Santosh Tadakamadla, Mesfin Tadese, Ken Takahashi, Nikhil Tandon, Nuno Taveira, Arash Tehrani-Banihashemi, Zelalem Teklemariam, Awoke Temesgen, Habtamu Temesgen, Mohamad-Hani Temsah, Omar Temsah, Tewodros Tesfa, Tamirat Tesfaye, Belay Tessema, Gizachew Tessema, Kavumpurathu Thankappan, Nihal Thomas, Amanda Thrift, George Thurston, Binyam Tilahun, Quyen G. To, Ruoyan Tobe-Gai, Marcello Tonelli, Roman Topor-Madry, Natacha Torres Da, Miguel Tortajada-Girbés, Mathilde Touvier, Marcos Roberto Tovani-Palone, Bach Tran, Khanh Bao Tran, Christopher Troeger, Thomas Truelsen, Nu Thi Truong, Derrick Tsoi, E Murat Tuzcu, Stefanos Tyrovolas, Kingsley Nnanna Ukwaja, Irfan Ullah, Eduardo Undurraga, Muhammad Shariq Usman, Olalekan Uthman, Muthiah Vaduganathan, Afsane Vaezi, Pascual Valdez, Tommi Vasankari, Narayanaswamy Venketasubramanian, Santos Villafaina, Francesco S Violante, Sergey Vladimirov, Vasiliy Vlassov, Stein Emil Vollset, Theo Vos, Gregory Wagner, Fasil Wagnew, Yasir Waheed, Mitchell Wallin, Judd Walson, Yuan-Pang Wang, Molla Mesele Wassie, Robert Weintraub, Fitsum Weldegebreal, Andrea Werdecker, Adhena A. Werkneh, T. Eoin West, Ronny Westerman, Lauren Wilner, Andrea Winkler, Charles Shey Wiysonge, Charles Wolfe, Grant Wyper, Denis Xavier, Gelin Xu, Ali Yadollahpour, Bereket Yakob, Lijing Yan, Yuichiro Yano, Mehdi Yaseri, Yasin Jemal Yasin, Alex Yeshaneh, Alex Yeshanen, Manaye Yihune, Ebrahim M. Yimer, Biruck Desalegn Yirsaw, Engida Yisma, Naohiro Yonemoto, Gerald Yonga, Seok-Jun Yoon, Marcel Yotebieng, Mustafa Younis, Mahmoud Yousefifard, Chuanhua Yu, Vesna Zadnik, Zoubida Zaidi, Sojib Bin Zaman, Mohammad Zamani, Zohrah Zare, Ayalew Jejaw Zeleke, Olifan Zewdie, Anthony Zhang, And Liesl Zuhlke.

#### [Drafting the work or revising is critically for important intellectual content](#)

Nooshin Abbasi, Muhammed Magdy Abd, Haftom Abebe, Olatunji Adetokunboh, Mohammad Esmail Akbari, Fares Alahdab, Khurshid Alam, Tahiya Alam, Syed Mohamed Aljunid, Yaw Ampem Amoako, Nahla Anber, Amit Arora, Peter Azzopardi, Hamid Badali, Berrak Bora Basara, Shahrzad Bazargan-Hejazi, Yihalem Abebe Belay, Molly Biehl, Muhammad Shahdaat Bin, Oliver Brady, Hermann Brenner, Franz Castro, Devasahayam Christopher, Flavia Cicuttini, John Crump, Ahmad Daryani, Nicole Davis Weaver, Selina Deiparine, Kerrie Doyle, Andre Duraes, David Edvardsson, Maysaa El Sayed Zaki, Andre Faro,

Mohammad Hosein Farzaei, Seyed-Mohammad Fereshtehnejad, Joao Fernandes, Nataliya Foigt, Segen G Meskel, Ayele Geleto, Ricard Genova-Maleras, Kebede Embaye Gezae, Maryam Ghasemi-Kasman, Rajat Das Gupta, Arvin Haj-Mirzaian, Alexis Handal, Mehedi Hasan, Hadi Hassankhani, Rasmus Havmoeller, Behzad Heibati, John Huang, Farhad Islami, Spencer James, Mehdi Javanbakht, Ravi Prakash Jha, Jacek Jozwiak, Mikk Jürisson, Surya Kant, Manoochehr Karami, Nicholas J Kassebaum, Grant Kemp, Chandrasekharan Nair Kesavachandran, Morteza Abdullatif Khafaie, Alireza Khajavi, Mona Khater, Yun Jin Kim, Mika Kivimaki, Ann Kristin Knudsen, Manasi Kumar, Dharmesh Lal, Alan Lopez, Jennifer Maclachlan, Hassan Magdy Abd, Azeem Majeed, Joemer Maravilla, Francisco Rogerlândio Martins-Melo, Melvin Marzan, Benjamin Massenburg, Colm Mcalinden, Tuomo Meretoja, Milena Santric Milicevic, Karzan Mohammad, Ghobad Moradi, Mehdi Moradinazar, Nahid Neamati, Jan-Walter De Neve, Molly Nixon, Andrew T. Olagunju, Bolajoko Olusanya, Heather Orpana, Justin R Ortiz, Simon Øverland, Hadi Parsian, Konrad Pesudovs, Michael R. Phillips, Hedley Quintana, Enayatollah Homaie Rad, Muhammad Aziz Rahman, Seyed Mohammad Riahi, Jacqueline Castillo Rivas, Aklilu Abrham Roba, Leonardo Roever, Gregory Roth, Sare Safi, Saeid Safiri, Mohammad Ali Sahraian, Juan Sanabria, Damian Santomauro, Muthupandian Saravanan, Shahabeddin Sarvi, Maheswar Satpathy, Seyedmojtaba Seyedmousavi, Katya Shackelford, Mehdi Sharif, Mika Shigematsu, Inga Dora Sigfusdottir, Rannveig Sigurvinsdottir, Virendra Singh, Karen Sliwa, Joan B Soriano, Ipsita Sutradhar, Nuno Taveira, Nihal Thomas, Marcos Roberto Tovani-Palone, Thomas Truelsen, Irfan Ullah, Olalekan Uthman, Selen Begum Uzun, Yuan-Pang Wang, Robert Weintraub, Adhena A. Werkneh, Gokalp Kadri Yentur, And Manaye Yihune.

#### [Extracting, cleaning, or cataloging data; designing or coding figures and tables](#)

Hedayat Abbastabar, Ibrahim Abdollahpour, Rufus A. Adedoyin, Olatunji Adetokunboh, Tahiya Alam, Syed Mohamed Aljunid, Mustafa Ansha, Ashish Awasthi, Marlina Bannick, Habtamu Wondifraw Baynes, Neeraj Bedi, Bayu Begashaw Bekele, Gregory Bertolacci, Muhammad Shahdaat Bin, Donal Bisanzio, Alexandra Brazinova, Paul Briant, Julio Cesar Campuzano, Chris Castle, Devasahayam Christopher, Michael Criqui, Matthew Cunningham, Anh Kim Dang, Ahmad Daryani, Barthelemy Kuate Defo, Getenet Dessie, Manisha Dubey, Aman Endries, Alireza Esteghamati, Hamed Fakhim, Takeshi Fukumoto, John Fuller, Nancy Fullman, Segen G Meskel, William Gardner, Ayele Geleto, Maurice Giroud, Taren Gorman, Nima Hafezi-Nejad, Mehedi Hasan, Roderick Hay, Yihua He, Behzad Heibati, Mostafa Hosseini, Mehdi Hosseinzadeh, Caleb Irvine, Moti Jalu, Vivekanand Jha, Catherine Johnson, Sarah Johnson, Manoochehr Karami, André Karch, Tesfaye Kassa, Nicholas J Kassebaum, Srinivasa Vittal Katikireddi, Grant Kemp, Andrei Keren, Behzad Khafaie, Behzad Khafaie, Mohammad Hossein Khosravi, Jagdish Khubchandani, Young-Eun Kim, Yun Jin Kim, Jonathan Kocarnik, Michael Kutz, Ihor Kuzin, Kathryn Lau, Shanshan Li, Shiwei Liu, Emilie Maddison, Dhaval Maghavani, Reza Malekzadeh, Mohammad Ali Mansournia, Wagner Marcenes, Winfried März, Mohsen Mazidi, Zerihun Menkalew, Anoushka Milliar, Lorenzo Monasta, Maziar Moradi-Lakeh, Hae-Sung Nam, Long Hoang Nguyen, Minh Nguyen, Mehdi Noroozi, Mohammad Reza Nowroozi, Jacob Olusanya, Mayowa Owolabi, Andrea Parisi, David Pereira, Max Petzold, David Pigott, Hossein Poustchi, Anwar Rafay, Seyed Mohammad Riahi, Luca Ronfani, Gregory Roth, Enrico Rubagotti, Hosein Safari, Saeid Safiri, Payman Salamati, Inbal Weiss Salz, Abdallah M. Samy, Damian Santomauro, Shahabeddin Sarvi, Monika Sawhney, Mehdi Sayyah, Sadaf Sepanlou, Seyedmojtaba Seyedmousavi, Mehdi Sharif, Peilin Shi, Farhad Shokraneh, Soraya Siabani, Virendra Singh, Jeffrey Stanaway, Michelle Subart, Patrick Sur, Dillon Sylte, Awoke Temesgen, Omar Temsah, Anna Torre, Bach Tran, Christopher Troeger, Nu Thi Truong, Kingsley Nnanna Ukwaja, Irfan Ullah, Rachel L. Updike, Gaurang Vaidya, Tommi Vasankari, Vasiliy Vlassov, Yasir Waheed, Shadrach Wilson, Shouling Wu, Simon

Yadgir, Ali Yadollahpour, Hossein Yahyazadeh, Naohiro Yonemoto, Mahmoud Yousefifard, and Sojib Bin Zama.

[Managing the overall research enterprise](#)

Ashkan Afshin, Tahiya Alam, Peter Allebeck, Zulfiqar Bhutta, Molly Biehl, Brigitte Blacker, Aaron J Cohen, Elizabeth A Cromwell, Lalit Dandona, Rakhi Dandona, Louisa Degenhardt, Samath D Dharmaratne, Daniel Dicker, Valery L Feigin, Christina Fitzmaurice, Kyle Foreman, Nancy Fullman, Thomas Fürst, Tsegaye Gebrehiwot, Simon I Hay, Peter Hotez, Spencer James, Nicholas J Kassebaum, Hmwe Kyu, Heidi J Larson, Stephen S Lim, Alan D Lopez, Rafael Lozano, Deborah Carvalho Malta, Ashley Marks, George Mensah, Awoke T Misganaw, Ali H Mokdad, Christopher J L Murray, Kate Muller, Mohsen Naghavi, Molly R Nixon, Helen Olsen, D M Pigott, Puja C Rao, Robert C Reiner, Gregory Roth, Joseph Salama, Benn Sartorius, Katya A Shackelford, Mari Smith, Jeffrey D Stanaway, Caitlyn Steiner, Roman Topor-Madry, Stein Emil Vollset, Theo Vos, Harvey Whiteford, Shelley Wilson, Maigeng Zhou.

[Did not provide contribution information](#)

Yuming Guo and Maria Inês Schmidt.

## Section 1: GBD Overview

### Section 1.1: Locations of the Analysis

The locations included in GBD 2017 have been arranged into a set of hierarchical categories composed of seven super-regions and a further nested set of 21 regions containing 195 countries and territories (Appendix Table 2). Each year, the GBD Study undertakes subnational analysis for a small number of new countries, and continues to estimate subnationally any that were undertaken in previous cycles. Subnational estimation in GBD 2017 includes five new countries (Ethiopia, Iran, New Zealand, Norway, Russia), and all countries previously estimated at subnational levels (GBD 2013: China, Mexico, United Kingdom; GBD 2015: Brazil, India, Japan, Kenya, South Africa, Sweden, and the United States; GBD 2016: Indonesia, United Kingdom). All analyses are at the first level of administrative organization within each country with the exception of New Zealand separately by Maori ethnicity, Sweden which has been estimated for Stockholm and non-Stockholm, and the United Kingdom which has been estimated down to the local government authority level). All subnational estimates for these countries were incorporated into model development and evaluation as part of the GBD 2017 study. To meet data use requirements, in this publication we present only subnational estimates that have been already published elsewhere (Brazil, India, Japan, Kenya, Mexico, Sweden, United Kingdom, United States); given space constraints these results are presented in appendix tables and figures instead of the main text (see Supplementary Results). Subnational estimates for countries with populations larger than 200 million (measured using our most recent year of published estimates) that have not yet been published elsewhere are presented wherever estimates are illustrated with maps, but are not included in data tables.

### Section 1.2: Time Period of the Analysis

A complete set of cause-specific mortality and years of life lost (YLL) numbers and rates were computed for the years 1980–2017.

All GBD 2017 results and online data visualisations will be made available upon paper acceptance.

### Section 1.3: Statement of GATHER Compliance

This study complies with the Guidelines for Accurate and Transparent Health Estimates Reporting (GATHER) recommendations. We have documented the steps involved in our analytical procedures and detailed the data sources used. See Appendix Table 1 for the GATHER checklist.

The GATHER recommendations may be found here: <http://gather-statement.org/>

### Section 1.4: List of abbreviations

5q0: probability of death from birth to age 5 years

45q15: probability of death from age 15 years to 60 years

Adol: adolescent

Air poll mort: mortality attributable to air pollution

ANC: antenatal care

ART: antiretroviral therapy

BMD: bone mineral density

BMI: body mass index

BTL: basic tabulation list

CBH: complete birth history

CD4: Cluster of differentiation 4+ T lymphocyte; an indicator of immune function

CDR: crude death rates

CKD: chronic kidney disease

CKD-DM: chronic kidney disease deaths attributable to diabetes

CoD: causes of death

CODEm: cause of death ensemble modelling

COPD: chronic obstructive pulmonary disease

CR: cancer registry

CRA: comparative risk assessment

CSA: childhood sexual abuse

CSMR: cause-specific mortality rate

CVD: cardiovascular disease

DAH: development assistance for health

DALYs: disability-adjusted life-years

DHS: Demographic and Health Survey

DPT: diphtheria-pertussis-tetanus

DRI: data representativeness index

DSP: Disease Surveillance Points

ELISA: enzyme-linked immunosorbent assay

EMR: excess mortality rate

EPEC: enteropathogenic *Escherichia coli*

EPP: Estimation and Projection Package

ETEC: enterotoxigenic *Escherichia coli*

FAO: Food and Agriculture Organization

GATHER: Guidelines for Accurate and Transparent Health Estimates Reporting

GBD: Global Burden of Diseases, Injuries, and Risk Factors Study

GEMS: Global Enteric Multicenter Study

GHDx: Global Health Data Exchange

GPRM: Global Price Reporting Mechanism

HAQ: Healthcare Access and Quality

HH air poll: household air pollution

Hib: *Haemophilus influenzae* type B

HIV CDR: Crude death rate due to HIV/AIDS

IAEG-SDGs: Inter-Agency and Expert Group on Sustainable Development Goal Indicators

IARC: International Agency for Research on Cancer

ICD: International Classification of Disease

IER: integrated exposure response

IHD: ischemic heart disease

IHR: International Health Regulations

ILO: International Labour Organization

IOTF: International Obesity Task Force

IPUMS: Integrated Public Use Microdata Series

IPV: intimate partner violence

ISIC: International Standard Industrial Classification

JMP: Joint Monitoring Programme

LDI: lag distributed income per capita

LMER: linear mixed effects regression

LRI: lower respiratory infection

MAP: Malaria Atlas Project

MCCD: Medical Certification of Causes of Death

MCEE: Maternal and Child Epidemiology Estimation group

MDG: Millennium Development Goal

MICS: Multiple Indicator Cluster Surveys

MIR: mortality/incidence ratio

MM: maternal mortality

MMR: maternal mortality ratio

MMS: Maternal Mortality Surveillance

Mort: mortality

NCD: non-communicable disease

NN mort: neonatal mortality

NTDs: neglected tropical diseases

Occ risk burden: burden attributable to occupational risks

ODA: Official development assistance

OECD: Organisation for Economic Co-operation and Development



PAF: population attributable fraction

PCV3: Three-dose pneumococcal conjugate vaccine

PM2.5: particulate matter <2.5µm in diameter

RCT: randomised controlled trial

RMSE: root mean square error

RSV: respiratory syncytial virus

SBA: skilled birth attendance

SBH: summary birth history

SBP: systolic blood pressure

SCD(R): Survey of Causes of Death (Rural)

SD: standard deviation

SDG: Sustainable Development Goal

SDI: Socio-demographic Index

SDSN: Sustainable Development Solutions Network

SEER: Surveillance, Epidemiology, and End Results Program

SEV: summary exposure value

SIR: smoking impact ratio

SRS: Sample Registration System

SSB: sugar-sweetened beverages

ST-GPR: spatiotemporal Gaussian process regression

TAC: TaqMan Array Card

TB: tuberculosis

TMREL: theoretical minimum-risk exposure level

TRIPS: Agreement on Trade-Related Aspects of Intellectual Property Rights

U5MR: under-5 mortality rate

UHC: universal health coverage

UI: uncertainty interval

UN: United Nations

UNICEF: United Nations Children's Fund

USSR: Union of Soviet Socialist Republics

VA: verbal autopsy

VR: vital registration

WaSH: water, sanitation, and hygiene

WFS: World Fertility Surveys

WHO: World Health Organization

YLDs: years lived with disability

YLLs: years of life lost

## Section 1.5: GBD results overview

Results from the Global Burden of Disease Study (GBD 2017) are now measured in terabytes. Results are available in an interactive data downloading tool on the Global Health Data exchange (GHDx).

The current version of the data download tool is available in the GHDx and contains core summary results for the GBD 2017: <http://ghdx.healthdata.org/gbd-results-tool>.

The core summary results include deaths, YLLs, years lived with disability (YLDs), and disability-adjusted life-years (DALYs). The GHDx includes data for causes, risks, cause-risk attribution, aetiologies, and impairments.

In the GBD 2017 version, the GHDx tool also contains measures such as prevalence and incidence as well as rate of change data. Data above a certain size cannot be viewed online but can be downloaded.

Depending on the size of the download, users may need to enter an email address; a download location will be sent to them when the files are prepared.

## Section 1.6: Data input sources overview

GBD 2017 incorporated a large number and wide variety of input sources to estimate mortality, causes of death and illness, and risk factors for 195 countries and territories from 1990-2017. These input sources are accessible through an interactive citation tool available in IHME's GHDx.

Users can retrieve citations for a specific GBD component, cause or risk, and location by choosing from the available selection boxes. They can then view and access GHDx records for input sources and export a CSV file that includes the GHDx metadata, citations, and information about where the data were used in GBD. Additional metadata for each input source are available through the citation tool, as required by the GATHER statement.

The citation tool is accessible through the GHDx at <http://ghdx.healthdata.org/gbd-2016/data-input-sources>.

## Section 1.7: Funding Sources

Research reported in this publication was supported by the Bill & Melinda Gates Foundation, the National Institute on Aging of the National Institutes of Health (award P30AG047845), and the National Institute of Mental Health of the National Institutes of Health (award R01MH110163). The content is solely the responsibility of the authors and does not necessarily represent the official views of the Bill & Melinda Gates Foundation or the National Institutes of Health.

## Section 2: GBD 2017 causes of death database

### Section 2.1: Background

Appendix Figures 1 and 2 show the high-level view of data inputs, analytical steps, and outputs of the CoD analysis frame. Section 2 of this appendix provides details on each step in the development of the CoD database as illustrated in Appendix Figure 1. The complexity of the overall process can be usefully divided into three broad phases: (1) data inputs on the event of death going into the CoD database that are analysed using CODEm; (2) data inputs on precursors to death that are modelled through a variety of strategies; and (3) the integration of these streams of analysis into a single set of CoD estimates by age, sex, year, and geography with uncertainty through the CodCorrect algorithm. A different process is used for cancer and HIV/AIDS estimations and is described in detail in Section 3.

### Section 2.2: CoD data identification

#### Section 2.2.1: Overview of data types

The CoD database contains seven types of data sources (Appendix Table 3): vital registration (VR), verbal autopsy (VA), cancer registry (CR), police records, sibling history, surveillance, and survey/census. The highest-quality data have detailed demographic group characteristics and detailed CoD across the time series. Data from countries with complete VR systems are considered to be high-

quality. For countries with incomplete VR systems, vital statistics for causes of death may be supplemented with other data types to provide cause-specific estimates (Appendix Figure 3).

### Section 2.2.2: ICD detail

A majority of the CoD data is VR data obtained from the World Health Organization (WHO) Mortality Database, a compilation of data submitted to the WHO by individual countries. VR is also obtained from country-specific mortality databases operated by official offices. VR data is considered to be the highest-quality data, as it is the most comprehensive. Each cause is coded directly to the most detailed CoD when possible, whereas cause codes in ICD-tabulated data are coded to aggregated cause groups. The CoD database contains 2,338 country-years of detailed data from 1980 to 2017, which includes underlying CoD coded with 3-5 digit codes, by country, year, sex, and age groups. Detailed causes are coded to one of the following International Classification of Disease (ICD) detail coding systems: ICD8, ICD9, or ICD10 (Appendix Table 4). Each coding system has a similar cause hierarchy and cause list that has continually developed over time. ICD10 is the current standard and the most exhaustive cause list. Within the cause lists, 5-digit codes are truncated to 4-digit codes to condense the lists. Updates to ICD detail occur biannually as WHO releases new versions or as country collaborators provide additional data. Updates to data from WHO increasingly include ICD10 CoD data, as it is the most current classification of CoD, while updates to ICD8 and ICD9 detailed lists are less common. In the case of overlapping data, preference is given to data from pre-determined country collaborations, which are updated annually.

### Section 2.2.3: ICD tabulations list

The ICD tabulation lists include the ICD8 List A (ICD8A), ICD9 Basic Tabulation List (BTL), ICD10 Mortality Tabulation, Russia Tabulation list, and India Medical Certification of Cause of Death (MCCD). These data sources make up 1,183 country-years from 1980 to 2016 in the CoD database. All are condensed versions of the ICD9 and ICD10 detail lists, with some differences in the format of cause lists depending on the data source. ICD8A, ICD9 BTL, and ICD10 Mortality Tabulation CoD are assigned to subtotal groups (referred to as chapters) and cause groups respective to ICD detail groups. Additionally, ICD9 BTL includes ICD9 detail codes for some cancers and a custom tabulation scheme for the former Union of Soviet Socialist Republics (USSR) countries. The Russia Tabulation lists and India MCCD cause lists each have custom nomenclatures based on ICD detail cause codes.

Two of the drawbacks in using tabulation lists are discrepancies in the accuracy of death counts and lack of detail due to aggregated cause groups. There are instances where the sum of deaths in chapter subtotals are not equal to the sum of cause groups within the chapter. To account for any missing or duplicate deaths reported within the cause groupings, death counts are systematically adjusted by calculating the differences between subtotals and sub-causes within the cause groups. Any differences are assigned to a remainder cause group. To account for the lack of cause code detail, select cause groups are disaggregated (Step 1.1) to create a complete cause list. Updates to ICD Tabulation lists obtained from WHO occur less frequently compared to ICD detailed lists, as more countries are reporting deaths in ICD detail. In instances of overlapping data, preference is given first to detailed collaborator data, followed by detailed WHO data, then tabulated collaborator data, and finally tabulated WHO data.

### *China DSP/China CDC*

The two primary sources of data for China are surveillance data from the China Disease Surveillance Points (DSP) system and VR data collected by the Chinese Center for Disease Control and Prevention (CDC). In the China DSP data, deaths were reported across 145 disease surveillance points used from 1991 to 2003, 161 points used from 2004 to 2007, and 605 disease surveillance points from 2008 to 2016. While China DSP with ICD10 coding is considered sample VR data, it provides national coverage and cause detail. Thus, it receives similar processing and treatment to the China CDC VR from 2008 to 2016. From 2008 to 2016, all of the deaths and CoD information from the Disease Surveillance Points system and other system points throughout China were collected and reported via the Mortality Registration and Reporting System, an online reporting system of the Chinese CDC. The deaths in these data are reported at the strata level, a metric that is specific to China. Counties are stratified by urban and rural classification, but definitions of urbanity vary across counties. In Step 7 we use a method developed to scale up deaths from strata level to the province level.

### *India MCCD*

The India Medical Certification of Cause of Death (MCCD) has data for the urban parts of the majority of the states and union territories beginning in 1980. Deaths reported in this data source have been medically certified and are considered VR data. The CoD are reported in a tabulation list with a unique numbering scheme that conforms to ICD9 and ICD10 detail codes, which must be disaggregated. MCCD is state-split to fill in data gaps (Step 1.2 State Splitting) prior to age-sex splitting. Because the Sample Registration System (SRS) is widely considered a more credible assessment of CoD in India, we chose to use MCCD data only in certain cases for modelling with CODEm. We preserved MCCD data in the database for two primary reasons. First, where the three midpoint years of SRS data resulted in the loss of a clear time trend, as was the case for maternal mortality, we chose to preserve MCCD in addition to SRS. Second, MCCD has advantage over SRS in cases where VA is not a valid instrument for ascertaining CoD, like encephalitis, dengue fever, and peptic ulcer disease – in these cases, we kept MCCD over SRS.

### *Section 2.2.4: VA*

#### *VA coded to ICD10 and VA coded to other lists*

In countries without VR systems, VA studies are a viable data source to inform CoD. Data are obtained by trained interviewers who use a standardised questionnaire to ask relatives about the signs, symptoms, and demographic characteristics of recently deceased family members. CoD is assigned based on the answers to the questionnaires.

VA data are highly heterogeneous: studies use different instruments, different cause lists (from single causes to full ICD cause lists), different methods for assigning CoD, different recall periods, and different age groups. Cultural differences may also affect the interpretation of specific questions. CoD validity must be considered when mapping to a GBD cause. VAs are likely accurate in assigning CoD to road injury or homicide, but less accurate for causes requiring medical certification, such as cardiovascular causes. Studies may also occur as stand-alone assessments or as part of an extended network, such as INDEPTH - a continuous surveillance source with several Demographic Surveillance Systems sites that collect data coded to ICD detail causes.

### *INTERVA-modelled VA*

INTERVA, a set of computer models intended to facilitate interpreting VAs, was found to be non-credible by the Population Health Metrics Research Consortium (PHMRC). As a result, INTERVA-modelled VAs are typically excluded from our analysis due to low validations, with the exception of injuries and maternal causes where they are used to fill gaps and stabilise patterns.

### *India SCD*

Deaths reported in VA studies in rural Indian states can be accounted for in the Survey of Causes of Death (SCD) from 1980 to 1994.<sup>1</sup> Data in the SCD were collected through a VA survey from a sample of villages. To expand our estimates to additional states and causes we used methods of state splitting post mapping to GBD causes (Step 1.2). For GBD 2017, the primary source of CoD data for India was India SRS, described below. With the exception of select causes for which SCD data were a critical source in CODEm models, SRS data were used in place of SCD data for causes included in both databases.

### *Sample registration system*

Sample registration systems are expanding in several countries, and are key sources of data in Indonesia and India. The SRS is a dual-record system wherein a resident part-time enumerator continuously records births and deaths in each household within the sample unit every month. A full-time SRS supervisor thereafter independently collects the vital events along with other related details for each of the preceding six month periods during the calendar year.

## Section 2.2.5: Other data types

### *Maternal mortality data*

In locations with low-quality, or no, VR, maternal mortality metrics can be found in surveillance, surveys, census, and sibling history data sources. The best data have death counts due to maternal causes and the total number of deaths for women within the reproductive ages of 10 to 54 by year. If a data source is missing these components, it is necessary to create a complete cause list using live births and all-cause mortality deaths (Step 1.4).<sup>2</sup> Though death counts are the preferred metric, maternal mortality is often measured using the maternal mortality ratio (MMR), which is easily converted to deaths using live births. The China Maternal and Child Surveillance data is adjusted by scaling data from the strata to the province level (Step 7).

### *Surveys and censuses reporting fraction of deaths due to selected injuries*

Surveys and censuses are often used in countries with less developed VR systems; in countries with adequate VR surveys and censuses are supplementary. Much like VAs, the CoD validity is a concern due to lack of medical certification at the time of death. For these data sources we only keep causes related to maternal mortality and injuries. The remaining causes are accounted for as a remainder of total deaths in the sample size.

## *Police records*

In most countries, police and crime reports are an important source of information for some types of injury deaths, notably road injuries and interpersonal violence. Our police data come from reports on road traffic and crime trends. The police reports used in this analysis were obtained from published studies, national agencies, and institutional surveys such as the United Nations (UN) Crime Trends survey and the UN Office on Drugs and Crime Global study on Homicides. We assess whether police reports were likely to be complete and cover the entire country by comparing police trends with those seen in VR. Data are excluded in instances where police data for road traffic injuries are significantly lower than the VR. The threshold for exclusion is less than 80% of the cause fraction of the road traffic injuries in VR. Police data that meet our inclusion criteria and provide complete coverage are uploaded to the database for use in road injuries and interpersonal violence deaths estimation.

### Section 2.2.6: Population-based cancer registries

#### *Cancer registries with incidence*

Data on cancer incidence were sought from individual population-based cancer registries as well as from databases that include multiple registries, including Cancer Incidence in Five Continents, NORDCAN, and EUREG. Cancer registries were identified through the membership list of the International Association of Cancer Registries, through the GBD collaborator network, or through the GHDx. Registries were excluded if they were not representative of the coverage population, if they did not contain incidence data tabulated by cancer site, if the data were limited to years prior to 1980, if the source did not provide details on the population covered, or if the list of cancer sites included was not comprehensive.

#### *Cancer registries with incidence and high-quality mortality data*

In addition to incidence, some high-quality cancer registries also report cancer mortality data. These data were also extracted and used as inputs to the mortality-to-incidence model.

### Section 2.3: Step 1 – Standardise input data

The input data to the CoD database are received in various formats and must be standardised to run through central CoD machinery to then upload to the database. Raw data inputs come from data sources such as mortality databases, literature reviews, or reports. Usable data sources must have a clear sample size of the number of deaths in the population and exhaustive cause lists. The complexity of the data cleaning process varies drastically across data sources. For VR micro-data with the location, age, sex, year, and ICD-coded cause of every death, very little effort is necessary to standardise it into a consistent structure. Other sources may require weeks of careful review to accurately extract scans of hardcover CoD reports into spreadsheets that can be transformed and standardised.

At this point, data are assigned source identifiers so that they can be linked to the Global Health Data Exchange (GHDx) and cited appropriately. Any aggregate age and sex categories are flagged for age-sex splitting. The methods of cause-of-death assignment and data collection are reviewed to determine which source type to assign; for example, we distinguish sibling history data from surveys with a VA

module. Only data at the most detailed level of the Global Burden of Disease location hierarchy are used. Documentation from the source is reviewed to determine if the population is representative of the location or only a subset of the population in that location. Data sources representing a subset of the population are flagged as non-representative; this flag is used by CODEm to increase the variance associated with such data points.

Finally, diagnostics are reviewed at this stage to avoid sending cleaning errors downstream. We review cause-specific deaths for each demographic group to ensure the data are reasonable. For example, it is unlikely that male breast cancer deaths are higher than female breast cancer or deaths from neonatal causes occur in age groups over one year. All deaths totals are compared with the sum of cause-specific deaths to ensure the observed deaths are accounted for and sample size is complete.

### Step 1.1 - Disaggregation

Causes of death in tabulated VR data are condensed into aggregated groups, some of which can be mapped directly to GBD causes while other aggregated cause groups are not informative and cannot be mapped to GBD causes. To correct for this, aggregated causes were mapped and split onto multiple ICD8, ICD9 and ICD10 detail causes, or targets, based on the ICD groupings within the aggregated causes. ICD8, ICD9 and ICD10 detail codes serve as targets because they are the highest-quality VR data and enable the calculation of proportions used to split the aggregated cause data into detailed causes. The proportions of deaths from nearby countries within the super-region were used to fill in data gaps as they were likely to have similar CoD trends.

We determined the targets based on detail causes missing from the tabulated cause list. For example, in ICD9 BTL, the tabulated cause list includes a viral diseases group. In the hierarchy of causes, this group consists of “measles”, “yellow fever”, “encephalitis”, “hepatitis”, “rabies”, “other infectious diseases”, “garbage code”, and “remainder of viral diseases”. We did not consider this list to be an exhaustive list of viral diseases based on the range of ICD detail codes given in the ICD9 BTL documentation. To make the cause list exhaustive and inclusive of other viral diseases, we split the remainder of the viral diseases group into “other meningitis”, “other infectious diseases”, “herpes”, “dengue”, “other neglected tropical diseases”, and “garbage code”. After a list of targets was determined, the aggregated deaths were disaggregated to the target causes using ICD8, ICD9, and ICD10 detail proportions generated at the super-region level for the corresponding sex and age groups across all years in the time series. For example, in ICD9 detail data, 54.8% of deaths in males in Latin America and the Caribbean within the target group for BTL Viral Diseases were designated “other meningitis”, so 54.8% of deaths in the tabulated group “remainder of viral diseases”, were assigned to “other meningitis” for any country within that particular super-region. For any cause and demographic group where we lacked ICD detail, global proportions were used.

### Step 1.2 - State splitting

Two sources for CoD estimation in India are the Medical Certification of Causes of Death (MCCD) report, which reports medically certified deaths from health facilities in mostly urban areas<sup>3</sup>, and the Survey of Causes of Death (SCD), which collects information via VA on about one-half of 1% of all rural deaths in India, based on populations living in about 1,300 primary health care centers spread throughout the country.<sup>4</sup> For both of these reports, missing data impedes estimation of trends at the



state level. We used a first-order, log-linear model of the four-way contingency table of deaths by sex, age, state, and year to estimate the missing state-years. We fit the model to all available data for MCCD and SCD separately for each cause, including state-specific all-age measurements and age-specific national measurements. From this, we produced estimates for each combination of sex, age, state, and year. We then used these estimates wherever the raw data did not include sex-, age-, and state-specific death counts.

For MCCD, the model was fit separately for ICD10- and ICD9-based reports using the tabulated cause list present in the data. In the SCD report, the model was fit for each GBD cause in the data. As data from the SCD reports were relatively sparse, the pooling of like causes together led to an improved model fit.

### Step 1.3 - Calculate non-maternal deaths

In cases when maternal mortality metrics do not include both deaths due to maternal causes and deaths due to non-maternal causes for women of reproductive age, live births and all-cause mortality estimates can be used to calculate deaths. Many studies report maternal deaths as the maternal mortality ratio (MMR). MMR is the number of maternal deaths per 100,000 live births and can be used to calculate deaths when it has been derived from primary data and not estimated. Maternal deaths were calculated using MMR and live births; if live births were missing we substituted live birth estimates and used the following equation:

$$\text{Maternal deaths} = \frac{\text{MMR}}{100,000} \times \text{Live births}$$

If a study was non-representative, we extracted sample size and live births from that study. After maternal deaths were calculated, we used the difference from all-cause mortality estimates to determine non-maternal deaths.

A more accurate and data-inclusive method of calculating maternal and non-maternal deaths incorporates coverage and splits deaths for a range of years into individual years. If there were live births in the study, we adjusted the coverage.

$$\text{Coverage} = \frac{\text{Live births}}{\text{GBD estimated live births}}$$

After coverage was calculated, totals deaths were scaled to be more representative. This gives a more accurate death count since the envelope assumes representative coverage. Using all-cause mortality as an all-cause total, non-maternal deaths were subsequently calculated.

$$\text{Maternal envelope with coverage} = \text{Maternal envelope} \times \text{Coverage}$$

An additional adjustment can be applied to maternal data spanning over a range of consecutive years, which allows for more data inclusion. The years within specified year ranges are separated into individual years, and total deaths within the year range were split between each individual year using the fixed proportions of maternal deaths from VR in that particular country. We used only VR data

inform the proportions because it was both high-quality and representative.

## Section 2.4: Step 2 - Map to GBD cause list

In GBD 2017 we used 529 maps to translate causes found in the input data to the GBD 2017 cause list. This included 33 maps for VR data, 289 for VA data sources, and 102 for other data types. The largest, and most universal, maps used were those for ICD9 and ICD10 detail VR data. The input data causes varied from 3-4 digit ICD codes to custom cause lists with cause names such as “cholera” or “hepatitis”. Our mapping process made it possible to compare these various data sources across demographic groups.

In GBD 2017, we developed additional maps to translate ICD codes found in the input data that are non-underlying causes to appropriate target codes based on the levels of the GBD cause list. These garbage codes were mapped to Levels 1-4 of the GBD cause list according to the following criteria:

1. **Level 1** includes all garbage codes for which a Level 1 GBD cause cannot be directly assigned. For example, the underlying causes of “sepsis” or “peritonitis”, if not specified in the data, could be an injury, a non-communicable disease, or a type of communicable disease. In these cases, deaths will be redistributed across all three of these Level 1 causes. In addition, deaths coded to impossible or ill-defined causes of death, including “senility” and “unspecified causes”, fall into this category, as they will be redistributed onto all causes.
2. **Level 2** includes all garbage codes that can be assigned to specific Level 1 causes in the GBD cause list. This would include deaths coded to “unspecified injuries” (X59), which are redistributed onto all injuries.
3. **Level 3** includes all garbage codes for which we know the Level 2 CoD, and can redistribute onto Level 3 causes. This includes deaths coded to causes such as “unspecified cardiovascular disease”, which falls within the Level 2 cause “cardiovascular diseases”, as well as those coded to “unspecified cancer site”, which falls within the Level 2 “neoplasms cause”.
4. **Level 4** includes all garbage codes for underlying causes of death that can be redistributed within a Level 3 cause. This includes garbage codes such as “unspecified stroke” or “unspecified road injuries.”

## Section 2.5: Step 3 – Age-sex splitting

Different sources, particularly VA studies, report deaths for a wide range of age groups with varying intervals. For the analysis of causes of death, we mapped these different age intervals to the GBD standard set of age groups. The approach to undertake this mapping was the same as in the prior GBD studies (GBD 2016, GBD 2015, GBD 2013, and GBD 2010).

In the process of assembling a consolidated demographic database, perhaps the most impactful source of inconsistency is the aggregation of age groups. It is conventional to report such data in broad age groupings such as “0-4”, “5-14”, and “15-49,” or to report data with both sexes together. The issue of comparability between age-sex groups arose when assembling the GBD CoD database. The compiled database included 22 distinct tabulation formats for infants and 141 distinct tabulation formats for non-infants. We developed a tool, which we call age-sex splitting, that takes aggregated age groupings,

and likewise the “both sexes combined” grouping, and divides them into what their constituent age groups would likely have been using respective cause-specific and country-specific age distributions. The analytical framework for GBD includes three infant age categories: Early neonatal (0-6 days), late neonatal (7-27 days), and post-neonatal (28 days to 1 year), and 17 non-infant age categories starting with age 1-4 years, then proceeds in five-year age groups until the terminal age group of 95+. We treat unknown ages and sexes in the same manner we treated the “all ages combined” age category and “both sexes combined” sex group. Through this process, we were able to directly compare all data sources on even terms.

The approach to age splitting is based on the following formula. The key assumption underlying this formula is that the relative risk of death by age group compared to a reference age group is invariant across populations. While this assumption is likely violated in specific cases, there is a strong biologically based pattern of the relative risk of death for a cause by age that is observed for most causes. The basic formula is as follows:

$$D_a = R_a N_a \left( \frac{D_a^{a+x}}{\sum_a^{a+x} (R_a N_a)} \right)$$

Where:

$D_a$  = the number of deaths from a cause in age group  $a$

$R_a$  = the relative risk of death in age group  $a$  compared to a reference group

$N_a$  = the country-year-sex-specific population in age group  $a$

$D_a^{a+x}$  = the number of deaths in the age group  $a$  to  $a+x$

With the assumption of invariant relative risks of death by age with respect to a reference age group, this equation can be used, along with population distribution by age, to split an aggregate number of deaths for the age groups  $a$  to  $a+x$  into specific deaths for each age group within the aggregate interval.

In some cases, deaths are reported for an aggregate age group for both sexes combined. The task in this case is more complicated, but the same principle can be applied. In this case we assumed that the relative risks of death by age and sex are constant.

$$D_{as} = R_{as} N_{as} \left( \frac{D_{as}^{a+x,s}}{\sum_a^{a+x} (R_{as} N_{as})} \right)$$

Where:

$D_{as}$  = the number of deaths from a cause in age group  $a$ , sex  $s$

$R_{as}$  = the relative risk of death in age group  $a$  compared to a reference group for sex  $s$

$N_{as}$  = the country-year-sex-specific population in age group  $a$  for sex  $s$

$D_a^{a+x,s}$  = the number of deaths in the age group  $a$  to  $a+x$  for sex  $s$

This equation can be used to split data aggregated over age and sex. The assumption, however, of invariant relative risks across age and sex is a stronger assumption. Fortunately, data pooled across sexes are less common in the published or unpublished CoD data.

The relative risk of death in a particular age group for a given sex is derived from the global distribution of cause-specific mortality rates found in available VR data. Location-years from the following code systems are used, provided they report the requisite age- and sex-detail: ICD7, ICD8, ICD9 BTL, ICD10 tabulated, ICD9, and ICD10. Upon compiling these data, we mapped them to GBD causes, and aggregated up to cause Level 3. This is the level at which a particular cause is split – that is, any daughter cause of a Level 3 parent is split using the age distribution of that parent (so, chronic kidney disease due to diabetes would be split using the age pattern of chronic kidney disease).

We next adjusted separately for estimated adult and child VR completeness. Location- year-age-sex-specific deaths and population were then aggregated across all location-years, in order to produce cause-specific mortality rates by age and sex. These were used to determine the risk of death at any age relative to any reference age group.

### Section 2.5.1: Correct age-sex violations

Occasionally, data sources will include deaths by a cause for which there is medical consensus that death is impossible for the sex and age. For example, there may be some number of deaths due to cervical cancer in males, or deaths due to maternal causes in ages under 10. We have constructed a conservative list of age-sex restrictions. When deaths violate these restrictions, we redistribute them proportionally onto all causes. All restrictions are included in Appendix Table 5, Restrictions on age and sex by cause for GBD 2017.

## Section 2.6: Step 4-- Correction for miscoding of Alzheimer's and other dementias, Parkinson's disease, and atrial fibrillation and flutter

### Section 2.6.1: Objective

For certain causes of death, mortality rates reported in vital registration systems are impossible to reconcile with observed trends in disease prevalence and excess mortality. For dementia, Parkinson's disease, and atrial fibrillation and flutter, these disparities can largely be attributed to death certification practices. We sought to address the known bias in cause of death data by first identifying the proportion of all deaths that should be assigned to these causes, and then determining the GBD causes and garbage groups to which these deaths are being incorrectly assigned.

In past GBD iterations, we estimated Alzheimer's disease and other dementias, Parkinson's disease, and atrial fibrillation and flutter on the basis of longitudinal prevalence and excess-mortality data in order to help account for changing patterns in death certification and corresponding implausible time trends in many VR sources. This method was first implemented for Alzheimer's disease and other dementias in GBD 2013. We added atrial fibrillation and flutter and Parkinson's disease to the causes modelled using

this strategy in GBD 2015 and GBD 2016, respectively. All of these causes were processed in CoDCorrect in a manner that was agnostic to the likely targets of misclassification, which inappropriately led to changes in mortality estimates for causes unrelated to these three in GBD 2015. For GBD 2016, we improved this process by completing a literature review to identify the causes of death most closely associated with Parkinson’s and Alzheimer’s diseases<sup>5-8</sup> and limiting the CoDCorrect adjustments to only include those causes. For GBD 2017, we have refined this approach further by using multiple CoD data to determine the GBD causes and garbage codes from which we move deaths, as well as the pattern of misclassification.

### Section 2.6.2: Correction Process

We first estimated excess mortality from prevalence and CoD data in countries with the highest ratio of cause-specific mortality to prevalence, which represents the greatest willingness to code to an under-coded cause. Then, we derived estimates of cause-specific mortality rates from available prevalence surveys as well as the estimates of excess mortality rate, applied across all countries and over time, using DisMod-MR 2.1. We divide this value by the all-cause mortality rate to determine the fraction of overall mortality to attribute to each under-coded cause.

To ascertain the causes from which we would move deaths to under-coded causes, we leveraged multiple CoD data from the United States – by looking to the combinations of intermediate and immediate causes (i.e., chain causes) present on death certificates with an under-coded cause listed as underlying, and identifying other causes with similar or identical chain causes, we can determine the expected pattern of miscoded deaths.

The first stage in this process is to parse out years we believe coding practices in the United States to be relatively stable. For dementia, this “gold standard” dataset features 2010-2015, for Parkinson’s 2005-2015, and for atrial fibrillation and flutter 2014-2015. We then collect all deaths in those years with the under-coded cause listed as underlying and remove any mention of the under-coded cause from the death certificate. Next, for each unique chain, we search the entire time series of data (1980-2015) to identify the distribution of underlying causes that share that chain. The premise here is that if the diagnosis of dementia, Parkinson’s, or atrial fibrillation and flutter were missed, the other causes listed on the death certificate would have been the basis for certification. We then reallocate the under-coded deaths by chain based on that alternative underlying cause distribution.

Upon iterating through all unique chains, we are left with a dataset excluding under-coded causes of death, each remaining cause able to be subdivided into correctly coded deaths and deaths that have been recoded from an under-coded cause by the aforementioned process (though not all causes will necessarily be targeted by the recoding algorithm). The quantity of interest is the ratio of miscoded deaths to total deaths by cause, age, and sex in our counterfactual dataset.

We apply the ratios derived from the multiple cause data to all VR data to determine the local pattern of miscoding. In this way, the method is sensitive to the observed epidemiology of a given place and time. Then, we calculate the deficit in under-coded cause mortality for each location, year, age, and sex by taking the difference in the expected cause fraction based on prevalence and excess mortality compared to the proportion of deaths actually certified by the VR system. Lastly, we scale the cause-specific miscoded deaths to match the deficit and then move them accordingly. We assumed that

misclassification of actual dementia and Parkinson’s deaths in past years only occurred for reported causes of death that might have plausibly been the direct result of dementia or resulted from misdiagnosis of other organic brain diseases, based on clinical expert judgement. A similar assumption is used for atrial fibrillation and flutter, for which only cardiovascular causes and ill-defined garbage are considered.

Because the deaths being reallocated vary by location-year, we need a mechanism to ensure plausible limits to how many deaths are extracted from each GBD cause and garbage code. To achieve this, we first run the above-mentioned algorithm on all 5-star VR data (see Section 2.16 of this appendix for an explanation of the star data quality rating system). Then, we determine the 95<sup>th</sup> percentile of the proportion of deaths moved for each GBD cause and garbage group by age and sex across location-years among these data. Those values are subsequently stored and applied as the limits for deaths moved by this process.

## Section 2.7: Step 5 - Redistribution

A crucial aspect of enhancing the comparability of data for CoD is to deal with uninformative, so-called garbage codes. Garbage codes are codes to which deaths were assigned that cannot or should not be considered as the underlying CoD, for example: “heart failure”, “ill-defined cancer site”, “senility”, “ill-defined external causes of injuries”, and “septicaemia”. The methods for redistributing these garbage-coded deaths were outlined in detail in Naghavi et al<sup>9</sup>, and the underlying algorithm for redistributing deaths assigned to these codes has not changed since GBD 2013.

### Step 5.1: Redistribute HIV-related garbage codes

Due to the disparate nature of HIV/AIDS mortality across space and time, dynamic redistribution of HIV/AIDS-related garbage codes was needed (Appendix Table 6). To inform this redistribution, we generated target proportions for each garbage group by age band (Under 1 month, 1-59 months, 5-19 years, 20-49 years, 50-59 years, 60-69 years, 70-79 years, and 80+ years), five-year time interval, and sex. The garbage groups either target HIV or a remainder target. The allotment of deaths to either of these is based on the regional increase in the mortality rate of all codes in the group relative to the rates seen in 1980–1984 – an increase greater than 5% is assumed to be HIV/AIDS-related, and the proportion of those deaths exceeding 5% are redistributed to HIV/AIDS. Any increase  $\leq 5\%$  is then assigned to the remainder target.

### Step 5.2: Regress garbage codes versus non-garbage codes

As in GBD 2015, the statistical analysis used to determine proportions for garbage code redistribution for ill-defined cancer sites, ill-defined external causes of injury, unspecified stroke, heart failure, hypertension, and atherosclerosis was based on the approach outlined by Ahern et al.<sup>10</sup> For each redistribution package, we defined the “universe” of data as all deaths coded to either the package’s garbage codes or the package’s redistribution targets for each country, year, age, and sex. We then ran a regression based on the following equation, separately for each target group and sex:

$$TG_{crt} = \alpha + \beta_1 Gar_{crt} + \beta_2 Age_{crt} Gar_{crt} + \theta_r Gar_{crt} + \gamma_r + \varepsilon_{ct}$$

Where:

$TG_{crt}$  = percentage of deaths within the given garbage code's universe which were coded to a given target group, by country

$Gar_{crt}$  = percentage of deaths within the given garbage code's universe which were coded to a given set of garbage codes

$\alpha$  = constant

$\beta_1$  = slope coefficient describing the association between  $Gar_{crt}$  and  $TG_{crt}$

$\beta_2$  = slope coefficient describing the association between the interaction  $Age_{crt}Gar_{crt}$  and  $G_{crt}$

$\gamma_r$  = region-specific random intercept (or super-region if the random effect on region is not significant)

$\theta_r$  = region-specific random slope (or super-region if the random effect on region is not significant)

$\varepsilon_{ct}$  = standard error, normally distributed and calculated by bootstrapping

This regression was adjusted from GBD 2013 to include fixed effects on the interaction of garbage and age to ensure smooth age patterns. We made this decision after investigating diagnostic visualisations that showed unlikely gaps between proportions assigned to different age groups.

Once proportions were produced for each country, sex, age, and target group, certain adjustments were made to conform our packages to the best medical evidence available. In some cases, we implemented restrictions on the proportions that the regressions could yield. For example, we did not allow any redistribution onto "Chagas disease" outside of Latin America and the Caribbean, or "suicide" under the age of 15. In other cases, we capped the proportion for some targets to the level that would be produced from proportional redistribution; for example, "haemoglobinopathy" and "haemolytic anaemia" were restricted to the level of proportional redistribution in the redistribution of "left heart failure". Occasionally, further adjustments were made on a case-by-case basis per country, age, sex, and target group to suppress the impact of outliers based on existing epidemiological evidence and expert judgment.

### *Development of an algorithm for redistribution of garbage codes based on multiple CoD data*

Multiple CoD data are a form of individual record causes of death data which include an underlying CoD along with other causes in the death chain, including intermediate and immediate causes. By analysing this type of data, we can sometimes find the true underlying CoD in other CoD data where the underlying cause is a garbage code or a misassigned CoD.

For GBD 2017, this approach was implemented in redistribution for a few select causes. One example of this approach is seen in the correction of the misassignment of deaths due to drug overdoses to unintentional poisoning. More than 90% of these types of poisonings are due to exposure to narcotics, psychodysleptics, and other drugs, specified or unspecified. More than 97% of these poisonings by

substance or drug occurred in ages 15–65. It is clear that these are not cases of accidental ingestion of substances, but rather that the substance has been deliberately ingested, with unintentional poisoning occurring.

Using multiple CoD records for the United States, Mexico, Brazil, and Australia from 1980 to 2014, we selected all deaths with underlying causes coded to X40–X44 and X49. Table A below shows the combination of other potential causes that can be found in the multiple CoD data for these underlying causes. Based on this table, we proportionally redistributed misassigned unintentional poisoning deaths to one of these causes. The main assumption behind this algorithm is the dominance of the fatality of some substances when considering a combination of drugs. Given the combination of different drugs and substances in these codes, opium is the main cause of fatality.<sup>11,12</sup> Other substances, like cocaine, methamphetamine, and alcohol in combination with cannabis are less likely to be dominant in fatality.<sup>13</sup>

*Table A. Algorithm for the selection and assignment of a substance or drug use CoD for deaths coded to an underlying cause of unintentional poisoning using multiple CoD data*

| Selection Algorithm               |         |                                   |                        |                        |                                   |                                   |
|-----------------------------------|---------|-----------------------------------|------------------------|------------------------|-----------------------------------|-----------------------------------|
|                                   | Opioids | Cannabis                          | Cocaine                | Amphetamines           | alcohol                           | Psychoactive and psychedelic drug |
| Opioids                           | Opioids | Opioids                           | Opioids                | Opioids                | Opioids                           | Opioids                           |
| Cannabis                          | Opioids | Cannabis                          | Cocaine                | Amphetamines           | alcohol                           | Psychoactive and psychedelic drug |
| Cocaine                           | Opioids | Cocaine                           | Cocaine                | Amphetamines + Cocaine | Cocaine + alcohol                 | Cocaine                           |
| Amphetamines                      | Opioids | Amphetamines                      | Amphetamines + Cocaine | Amphetamines           | Amphetamines + alcohol            | Amphetamines                      |
| alcohol                           | Opioids | alcohol                           | Cocaine + alcohol      | Amphetamines + alcohol | alcohol                           | Psychoactive and psychedelic drug |
| Psychoactive and psychedelic drug | Opioids | Psychoactive and psychedelic drug | Cocaine                | Amphetamines           | Psychoactive and psychedelic drug | Psychoactive and psychedelic drug |

For example, if the multiple CoD data show that 40% of deaths include opioid use disorders as an intermediate cause where the underlying cause is X40–X44, X49, the redistribution proportion for opioid use disorders will be exactly 40% due to the dominance of the fatality of opioid use disorders compared to other drugs in the above table. Similarly, because cannabis is not assumed to have dominance of fatality compared to any of the above drug use disorders, the proportion of X40–X44, X49 redistributed to cannabis use disorders was the percentage of deaths in the multiple CoD data that had only cannabis use disorders as an intermediate cause and none of the other above causes. If 40% of



deaths had cannabis use disorders listed in the intermediate cause list, but those 40% also had one or more of opioids, cocaine, amphetamines, alcohol, or psychoactive and psychedelic drugs, the redistribution proportion to cannabis use disorders would be 0%.

Multiple CoD data were only available to us for the United States, Brazil, Mexico, and Australia. Because of this limited sample, we applied the result from multiple CoD analysis from the United States to the United States and Canada, from Brazil and Mexico to Latin America and the Caribbean, and from Australia to Australia, New Zealand, and Western Europe. For other locations, we aggregated the results from the four countries and applied the aggregate pattern. We hope for increased availability of multiple causes of death data in future analyses in order to achieve a more precise distribution for more locations.

### Step 5.3: VA anemia adjustment

To compensate for the over-representative cause fractions from anemia found in VA studies, we redistributed these deaths based on the causal attribution of severe anemia from the GBD 2013 study. The proportions were country-year-age-sex specific.

### Step 5.4 Calculate redistribution uncertainty

We categorized garbage codes into four levels in order of increasing specificity (see Section 2.4 of this appendix). Some garbage codes are redistributed on all causes (e.g. unspecified causes of death) and others are only redistributed onto specific causes (e.g. unspecified cancer). Major garbage refers to garbage codes in levels one or two. Due to the variation in redistribution, estimating uncertainty due to garbage redistribution for CODEm modeling was an important goal for GBD 2017.

We assigned redistribution variance to each data point in the CoD database by calculating residual variance from a regression predicting the percent of garbage coded deaths redistributed to a cause, given the proportion of garbage we observed for that location, year, age, sex, cause and the age standardized relative rate of major garbage across all causes. If there is a cause that has greater residual variance, we assume greater redistribution uncertainty.

The two model inputs are the observed percent level 1, 2, 3 garbage (by cause, age, sex, location, and year) in redistributed CoD data and the percent garbage in the raw data (calculated as the age standardized mortality rate ratio of major garbage deaths to all deaths in the raw data by location, year, sex). Level four garbage was excluded from the model to avoid over estimating uncertainty in low major garbage countries. Additionally, the classification of level 4 garbage codes is not stable between successive GBD rounds – for example, “unspecified diabetes” was not a garbage code in GBD2016, and in GBD2017 was re-classified as a level 4 garbage code to permit estimation of diabetes by type. These deaths are still taken into account later in the uncertainty estimation process. The model predicts the percent of garbage coded deaths redistributed to a cause, given the proportion of garbage we observed for that location, year, age, sex, cause and the age standardized relative rate of major garbage across all causes. From this model we calculate residual variance. It is important to note that the variance here is a measurement of uncertainty of redistribution, not of the level of miscoding in the raw cause of death data for a given demographic.

In order to calculate variance, a dataset was generated containing percent garbage by location, year, age, sex and cause, where percent garbage is:

$$pct_{garbage} = \frac{deaths_{redistributed} - deaths_{raw}}{deaths_{redistributed}}$$

A mixed-effect linear regression model was then fit to predict the logit percent of deaths from redistribution by age-standardized relative rate of major garbage.

$$\begin{aligned} \text{logit}(pct_{garbage_{ij}}) &= \beta_0 + \beta_1 * \log(ASR_{majorgarbage_{ij}}) + \beta_2 * 15yearage_{ij} + \gamma_{1j} \\ &* \log(ASR_{majorgarbage_{ij}}) + u_j + e_{ij}, \theta_{\{i\}} \sim N(0, \sigma^2) \end{aligned}$$

Where:

$i$  indexes dataset-location-year-age-sex-cause data points nested within  $j$  groups by GBD region

ASR major garbage: age standardized relative rate of major garbage

Residual variance, as estimated by the MAD, was calculated for each cause, sex, and age.

The next step was to use the residual variance to calculate uncertainty around each data point in the CoD database. First, we calculated the percent garbage of each data point, treating all deaths that could not be directly mapped to a GBD cause as garbage, including level four garbage. Percent garbage was calculated as:

$$pct_{garbage} = \frac{deaths_{redistributed} - deaths_{corrected}}{deaths_{corrected}}$$

Where:

death corrected: deaths post misdiagnosis correction (Appendix Section 2.6)

deaths redistributed: deaths post redistribution (Appendix Section 2.7)

Residual variance was matched to each data point and one hundred draws were sampled from a normal distribution using the cause, age, sex, specific residual variance and mean of zero. The logit transformed percent garbage was added to each value in the distribution. Each draw was then transformed out of logit space and the post-redistribution deaths were calculated as:

$$deaths = \frac{deaths_{corrected}}{1 - pct\_garbage}$$

Draws of deaths were processed through noise reduction before calculating the final redistribution variance passed to CODEm, which was added to the total data variance. The mean of the draws was not used as the final estimate, because it was found that the logit transformation biases the distribution of cause fractions higher than if only point estimates are used.

## Section 2.8: Step 6 - HIV/AIDS misclassification correction

In many location-years, certain causes of death known to be comorbid with HIV/AIDS (eg, tuberculosis, other infectious diseases) are seen to have age patterns that diverge from those observed in location-years without widespread HIV epidemics and are in fact more reflective of HIV mortality trends. In order to identify these instances, a global relative age pattern is generated using all VR deaths in countries with observed HIV prevalence less than 1% using the following:

$$RR_{asc} = \frac{R_{asc}}{\bar{x}(R_{65sc}, R_{70sc}, R_{75sc})}$$

Where  $RR_{asc}$  is the relative death rate for age group  $a$ , sex  $s$ , and cause  $c$ ;  $R_{asc}$  is the rate for that age group; and  $\bar{x}(R_{65sc}, R_{70sc}, R_{75sc})$  is the mean of the rates in ages 65–69, 60–74, and 75–79 for that sex and cause. This is preferable to comparing mortality rates because we are able to isolate divergence in age pattern while accounting for varying levels of overall mortality by fixing death rates to age groups that are unlikely to be confounded by the presence of HIV. Expected deaths for an identified cause were then determined to be:

$$ED_{lyasc} = \bar{x}(R_{ly65sc}, R_{ly70sc}, R_{ly75sc}) \times p_{lasc} \times RR_{asc}$$

Where  $ED_{lasc}$  are deaths for location  $l$ , year  $y$ , age group  $a$ , sex  $s$ , and cause  $c$ ;  $\bar{x}(R_{l65sc}, R_{l70sc}, R_{l75sc})$  is the mean of the rates for ages 65–69, 60–74, and 75–79 for that location-year-sex-cause;  $p_{lasc}$  is the population for that location-year-age-sex-cause; and  $RR_{asc}$  is the global standard relative rate determined in the previous step for that age-sex-cause. The expected deaths remain attributed to that particular cause, while the difference between observed and expected are reallocated to HIV/AIDS.

## Section 2.9: Step 7 - Scale strata to province

Over time, a higher proportion of deaths have been registered in China through the expansion of the DSP system and provincial/county efforts to increase CoD registration. With the expansion of coverage, it is possible that province aggregates do not accurately represent the population distribution between urban and rural areas in each year. For this reason, we stratified the data preparation by urban and rural status for each county within each province. Stratification was based on the median level of urbanisation across counties within each province as recorded in the 2010 China census. In the provinces of Tibet and Hainan, all counties were placed into one strata based on largely homogeneous urbanisation levels within each province. This yielded a total of 62 analytical province-strata. Macao and Hong Kong were not included in this stratification system as the VR systems there are independent from that on the mainland; no weighting scheme needs to be carried out in these complete VR systems with quality data on causes of death.

Within each province-strata, a larger proportion of deaths in-hospital might be reported than that of deaths outside of hospital because of the internet hospital reporting system. To avoid bias, we reweighted in-hospital and out-of-hospital deaths based on the age-sex-province-specific fraction of deaths in and out of hospital in the DSP system. DSP data have been used to establish these percentages because, in these communities, there is a concerted effort to identify all out-of-hospital

deaths. Province-strata death rates are combined to produce overall province death rates by weighting each strata by population in each age-sex-year group. Province death rates are rescaled so that all-cause mortality equals the estimated death rate in each age-sex-year estimated in the life-table analysis. The Bayesian noise reduction algorithm was used to deal with zero counts and small number issues for rare causes.<sup>14</sup>

## Section 2.10: Step 8 - Restrictions post-redistribution

Some causes of death can only be reliably assigned through an autopsy by a trained physician. For example, it is unlikely that a VA would reliably distinguish between ischaemic and haemorrhagic stroke.

This step ensures that the detail of the cause list at this point in the data prep process is reasonable given the detail of the original data source and the methods by which the CoD was assigned. Two primary corrections are applied. First, any cause which is purely an artifact of the redistribution machinery targeting too detailed a cause is aggregated up to the parent cause. Second, a “bridge map” is applied over a certain set of sources to ensure that these sources do not contain causes which could not reliably be determined by the methodology. These two corrections are applied to ICD9-BTL, ICD10-tabulated, USSR tabulated ICD9, India MCCD reports, China-DSP-tabulated-ICD9, India SCD reports, India SRS, and all VA sources.

## Section 2.11: Step 9 - Drop VR country years or mark as non-representative

Lozano and colleagues<sup>15</sup> describe the negative impact that low-completeness VR data could have on CoD modelling for GBD 2010. In particular, in settings where a data source does not capture all deaths in a population, the cause composition of deaths captured might be different from those that are not. However, a completeness sensitivity test found that low-completeness VR data had little impact on the cause-specific mortality trends at the global level.

For GBD 2017, we investigated the impact of these data at the country and subnational levels using the more thorough diagnostic visualisations available to us. It was determined that these data produced unlikely trends in the models affected. Despite the minimal impact on global trends, better models were produced by eliminating or marking as non-representative data with extremely low completeness. VR completeness was estimated as the number of deaths registered divided by the number of deaths estimated in the GBD mortality envelope.

For this round, VR location-years with completeness below 50% were dropped, while location-years with completeness between 50% and 69% were marked as non-representative.

In addition, any country-year with a number of deaths registered to major garbage codes greater than 50% of the deaths registered was dropped.

## Section 2.12: Step 10 - Cause aggregation

The cause list is organised in a top-down hierarchical format containing four levels. The first group, or Level 1, sums all causes. Following all cause-mortality are Level 2 causes, which include three broad groupings of causes of deaths: “communicable, maternal, neonatal, and nutritional diseases”; “non-

communicable diseases”; and “injuries”. Within those Level 2 groupings are finer levels used for modelling. Level 3, or parent causes, are aggregated; the mortality estimate for a parent cause in the hierarchy represents the sum of the causes under that rubric. Sub-causes within Level 3 causes – Level 4 – are more detailed. For example, the parent cause “intestinal infectious diseases” contains the three sub-causes: “typhoid fever”, “paratyphoid fever”, and “other intestinal infectious diseases”. Included in the parent cause estimate are deaths mapped directly to the parent and any Level 4 sub-causes. In data where there was not enough information to assign a Level 4 cause, we aggregated to the Level 3 parent cause. Exceptions to aggregating the Level 4 sub-causes to the parent are instances when certain sub-causes are not present. The United Nations Crime Trends police data only identify homicides, and aggregating homicides to injuries would not accurately represent all injuries.

## Section 2.13: Step 11 – Remove shocks and HIV/AIDS maternal adjustments

For GBD 2017, CODEm models use an HIV/AIDS- and shock-free envelope. In order to be comparable, cause fractions must also be HIV/AIDS- and shock-free. Cause fractions were uploaded to the CoD database as the number of deaths due to the cause over an adjusted sample in which the number of deaths due to “HIV/AIDS”, “conflict and terrorism”, “executions and police conflict”, and “exposure to forces of nature” were removed.

### Step 11.1 Remove HIV/AIDS, shocks from denominator where cause list includes HIV/AIDS

The first step to generate HIV- and shock-free cause fractions was to remove any deaths from the sample which were directly coded to “HIV/AIDS”, “collective violence and legal intervention”, or “exposure to forces of nature”. The resulting equation for a cause fraction uploaded to the database is simple:

$$CF_{l,t,a,x,c} = \frac{D_{l,t,a,x,c}}{D_{l,t,a,x} - D_{l,t,a,x,hiv} - D_{l,t,a,x,war} - D_{l,t,a,x,disaster}}$$

Where:

$CF_{l,t,a,x,c}$  is the cause fraction for a location ( $l$ ), year ( $t$ ), age ( $a$ ), sex ( $x$ ), and cause ( $c$ )

$D_{l,t,a,x,c}$  is the number of deaths observed in the sample for the same

$D_{l,t,a,x}$  is the total number of deaths observed in the sample in the location, year, age and sex

$D_{l,t,a,x,hiv}$ ,  $D_{l,t,a,x,war}$ , and  $D_{l,t,a,x,disaster}$  are the number of deaths observed in the sample for “HIV/AIDS”, “collective violence and legal intervention”, and “exposure to forces of nature”, respectively

Cause fractions for HIV/AIDS and shock causes were also uploaded to the database for use in separate estimation processes described by Wang et al.<sup>12</sup> In this case, cause fractions followed the standard equation, with variables following the same explanation as above:

$$CF_{l,t,a,x,c} = \frac{D_{l,t,a,x,c}}{D_{l,t,a,x}}$$

### Step 11.2 Remove HIV/AIDS deaths from maternal mortality sources

HIV-free cause fractions were also uploaded for sources on mortality due to maternal causes. In these cases, the sample of all deaths observed in the study is likely to contain some amount of deaths due to HIV/AIDS and shocks, but the sample only includes cause information on maternal deaths. To account for the presence of HIV/AIDS and shocks in the entire sample, we assumed the same proportion of total deaths due to HIV/AIDS by location, age, sex, and year as provided from the estimation of HIV/AIDS and all-cause mortality described by Wang et al.<sup>2</sup>

Maternal mortality studies were only corrected for HIV/AIDS if the sample of total deaths was provided in the data source. Where sources only provided the Maternal Mortality Rate (MMR), we applied the rate to the HIV- and shock-free envelope produced by the analysis described in Wang et al.<sup>2</sup> and thus did not need to adjust cause fractions at this point in the process.

Where a correction was applied, we used the following equation:

$$CF_{l,t,a,x,mat} = D_{l,t,a,x,mat} \times \frac{E[D_{l,t,a,x,hiv\_shock\_free}]}{E[D_{l,t,a,x}]}$$

Where:

$CF_{l,t,a,x,mat}$  is the resulting cause fraction due to maternal causes for the location ( $l$ ), year ( $t$ ), age ( $a$ ), sex ( $x$ );

$D_{l,t,a,x,mat}$  is the number of observed deaths in the sample due to maternal causes

$E[D_{l,t,a,x}]$  is the GBD estimate of all-cause mortality in the location, year, age, and sex

$E[D_{l,t,a,x,hiv\_shock\_free}]$  is the GBD estimate of HIV- and shock-free mortality in the location, year, age, and sex

### Step 11.3 HIV/AIDS correction of sibling history, census, and survey data

As described in our analysis from GBD 2013, many studies have failed to find increased mortality in HIV+ pregnant mothers, but those who have advanced HIV are known to have increased baseline mortality. Prior to GBD 2013, we did not distinguish between deaths in HIV+ women that were caused by pregnancy and those for which the pregnancy was incidental to their death. In order to more explicitly quantify the contribution of pregnancy to death in HIV+ women, and therefore more accurately estimate the maternal death count, we completed two additional analyses for GBD 2013 and all subsequent GBD analyses. First, we determined the population attributable fraction (*PAF*) of HIV/AIDS to pregnancy-related death. Second, we determined the proportion of pregnancy-related deaths in HIV-positive persons that are aggravated by pregnancy and are therefore by definition

maternal deaths.

$$PAF = \frac{P(RR - 1)}{1 + P(RR - 1)}$$

Where *PAF* is the population attributable fraction, *P* denotes the prevalence of HIV in pregnancy, and *RR* is relative risk of mortality in HIV+ vs HIV- pregnant females.

To recap our analysis for GBD 2013, we used the paper published by Calvert and Ronsmans to identify sources<sup>16</sup> that could inform Step 1 of our HIV-correction analysis. We independently reviewed each of the component studies in Calvert and Ronsmans' review and extracted data directly, not from the systematic review paper. We identified only one additional study that was not used in Calvert and Ronsmans' analysis. We have, however, not used all the studies included in that review. Specific details are as follows:

- 1) Figueroa-Damian, et al. was excluded for not including any postpartum deaths at all.<sup>17</sup>
- 2) In the case of Ryder, et al. and Zvandasara, et al. we excluded those deaths > 12 months after delivery.<sup>18,19</sup>
- 3) We excluded the results from Chilongozi, et al. from the site that did not include any HIV-negative patients.<sup>20</sup>
- 4) Leroy, et al. was not in the bibliography. We could not locate it for review so it was excluded.<sup>21</sup>
- 5) Kourtis, et al. was extracted with adjustment of the denominator based on the average number of hospitalisations per delivery in each group.<sup>22</sup>
- 6) Ticconi, et al. was excluded for being both non- representative and including subgroup data from mothers with malaria infection.<sup>23</sup>

A total of 21 sources were included in our analysis of the increased mortality risk of HIV+ versus HIV- women in pregnancy.<sup>13</sup> We performed DerSimonian-Laird random effects meta-analysis to derive a pooled estimate of *RR* of death during pregnancy given HIV positivity.<sup>24</sup> The pooled effect size was 6.40 (95% uncertainty interval [UI] 3.98–10.29), which was then used to calculate an HIV *PAF* for each country, age group, and year. In order to determine the proportion of those HIV-related deaths that were attributable to maternal causes, we performed a second systematic literature review. This time we sought evidence for the excess mortality risk of pregnancy in those women who are already HIV+. Most studies have failed to find such an effect, but most also did not stratify their study population by stage of HIV or ART status. Only two studies did this stratification, with a pooled effect size of 1.13 (95% UI 0.73–1.77).

An updated literature review to inform the relative risk of mortality in pregnancy in HIV-positive versus HIV-negative women had 14 no usable sources. We completed this search on July 20, 2017, using the following search strings:

( ( HIV[Title/Abstract] OR "Acquired Immunodeficiency Syndrome"[Title/Abstract] OR AIDS[Title/Abstract] ) AND ( "pregnant"[Title/Abstract] OR "pregnancy"[Title/Abstract] OR "postpartum"[Title/Abstract] OR "post partum"[Title/Abstract] ) AND ( "mortality"[Title/Abstract] OR "death"[Title/Abstract] ) NOT "case report" NOT ( animals[MeSH] NOT humans[MeSH] ) )  
AND ( 2016/08/15[PDat] : 2017/12/31[PDat] ) )

Prevalence of HIV in pregnant women was calculated using UNAIDS' Spectrum model, a compartmental HIV progression model used to generate age-specific incidence, prevalence, and death rates from pre-calculated incidence curves and assumptions about intervention scale-up and local variation in epidemiology. For each location, we used UNAIDS' age-specific ratios of fertility in women living with HIV to fertility in women not living with HIV. In most locations, this ratio is assumed to be greater than one in women aged 15–24 and less than one and decreasing as age increases beyond 24. Since Spectrum assumes fertile ages of 15–49, we used the ratio of HIV prevalence in pregnant women to HIV prevalence in the general population at either end of that range to extend estimates to age bands 10–14 and 50–54.

Unlike GBD 2013, when we applied the PAF correction to the envelope of maternal deaths predicted by CODEm, we instead applied country-year-age-group-specific *PAF* to maternal mortality input data prior to modelling in CODEm. This ensured that both the numerator and denominator of all *CF* data were internally consistent in their exclusion of background HIV/AIDS mortality. The cause fractions for maternal deaths in sibling history, survey, and census data were therefore adjusted as follows:

$$CF_{l,t,a,x,mat_{adj}} = CF_{l,t,a,x,mat} \times (1 - ProP_{hiv_{l,t,a,x}})$$

$$ProP_{hiv_{l,t,a,x}} = PAF_{l,t,a,x,hivpos} \times (1 - rr_{mat})$$

$$CF_{l,t,a,x,mat_{hiv}} = CF_{l,t,a,x,mat} \times ProP_{maternalhiv_{l,t,a,x}}$$

$$ProP_{maternalhiv_{l,t,a,x}} = PAF_{l,t,a,x,hivpos} \times rr_{mat}$$

Where:

$CF_{l,t,a,x,mat}$  = The proportion of deaths due to all maternal causes before HIV/AIDS correction for the location, year, age, and sex.

$CF_{l,t,a,x,mat_{adj}}$  = The proportion of deaths due to maternal causes after the adjustment for the location, year, age, and sex.

$CF_{l,t,a,x,mat_{hiv}}$  = The proportion of deaths due to maternal deaths aggravated by HIV/AIDS after the adjustment for the location, year, age, and sex.

$PAF_{l,t,a,x,hivpos}$  = The population-attributable fraction (PAF) that describes the percentage of all maternal deaths that were HIV-related for the location (l), year (t), age (a), and sex (x=Female))

$ProP_{hiv_{l,t,a,x}}$  = The proportion of deaths in pregnancy for the location, year, age, and sex that are estimated to be incidental deaths due to HIV/AIDS, and therefore not a maternal CoD.



$ProP_{maternalhiv_{l,t,a,x}}$  = The proportion of deaths in pregnancy for the location, year, age, and sex that are estimated to be HIV-positive and maternal deaths which are aggravated by HIV/AIDS.

$rr_{mat} = .13/1.13$  = The proportion of HIV/AIDS deaths during pregnancy that were exacerbated by the pregnancy.

#### Step 11.4 HIV/AIDS correction of other maternal mortality data

Although there are a specific subset of codes in ICD10 that correspond to HIV/AIDS deaths aggravated by pregnancy, these codes are sparsely used and unreliable. We therefore adapted the method above to also correct VR and VA sources for the systematic exclusion of HIV-related maternal deaths. This correction was calculated in the same manner, using the same input data as above, with the only difference that HIV correction of VR and VA sources resulted in a net increase in maternal CF. Maternal deaths aggravated by HIV/AIDS are calculated as the following (where all symbols are the same as described above):

$$CF_{l,t,a,x,mat_{hiv}} = CF_{l,t,a,x,mat} \times ProP_{maternalhiv_{l,t,a,x}}$$

$$ProP_{maternalhiv_{l,t,a,x}} = \frac{PAF_{l,t,a,x,hivpos} \times rr_{mat}}{1 - PAF_{l,t,a,x,hivpos} \times rr_{mat}}$$

#### Section 2.14: Step 12 – Noise Reduction

To deal with problems of zero counts in VR, VA, cancer registries, or sibling histories for a given age group in a given year, we use a Bayesian noise-reduction algorithm. For this algorithm, we assume a normal prior and a normal data likelihood. We estimate the normal prior for a given country-series of data by estimating a negative binomial for the fraction of deaths in each age group due to each respective cause with dummy variables for age and year. With two notable exceptions (detailed below), these regressions are country-specific, so borrowing strength over age is only within a data type in a country. The variance of the prior,  $\tau^2$ , is estimated from the negative binomial regression, taking into account the variance-covariance matrix of the regression coefficients. For the data variance, we use the Wilson approximation which provides an estimate of  $\sigma^2$  even in cases with a zero count of cause-specific deaths. The posterior estimate for each data point is:

$$Mean = \left( \frac{\tau^2}{\tau^2 + \sigma^2} X + \frac{\sigma^2}{\tau^2 + \sigma^2} \mu \right)$$

$$Variance = \left( \frac{\tau^2 \sigma^2}{\tau^2 + \sigma^2} \right)$$

Where  $X$  is the mean of the data and  $\mu$  is the mean of the prior. This approach to noise reduction avoids the problem that zero counts in an  $ln$  rates model or a logit cause fraction model will be dropped from the regression and lead to upward bias in the estimates. This is particularly important in two settings: high-income countries with small numbers of cause-specific deaths, and in the analysis of sibling history

data where for any given age group in any given year the number of deaths reported in the survey that are pregnancy-related or the number of deaths from all causes in that age group may be small.

Regarding the exceptions to the regression, the first is that country-years with populations under 1 million are pooled with the region data in order to prevent overdispersion and provide a stronger signal. Additionally, VA data diverge from the above description in two ways. First, all data for a given super-region are pooled together and a study dummy variable is added, allowing for different studies and surveillance sites to borrow strength from one another within a super-region. Second, unless the data are part of a time series (eg, Matlab HDSS), there is no year component to the regression.

### Section 2.15: Step 13 – CoD database and outlier identification

Death rates for different causes of death generally have a stable age pattern. In large populations, these patterns will not change very rapidly over time. We can assume a relatively stable pattern in death rates for all causes except for some epidemic diseases and specific types of injuries. Rare causes in large populations and prevalent causes in small populations usually have stochastic patterns. To correct for these stochastic patterns, we implement a noise-reduction process, explained in Step 12.

In VR data, we infrequently find one or more data points for specific geography/age/sex/years that lie very far from the stable pattern of death rates. In these situations, the model will usually ignore the data point(s). If the model fails to ignore these data, dramatic jumps or drops can occur in the death rates. When there is no logical explanation for variation in the death rates to this degree, we outlier the data point(s). The selection of data points to outlier occurs after data have been prepped for modelling, as well as during preliminary reviews of the models.

In non-VR sources, data-collection methods and data quality can vary widely from source to source. Where data points in each age-sex-geography-year are very sparse, extreme data points can have a bad effect on regional estimation. In these situations, we investigate the study's methods and outlier lower-quality data points.

Identifying outliers in the CoD data occurs prior to finalisation of models for each cause. We do not automate the selection of outliers, but investigate the source of the offending data as well as reviewing other data sources for the same cause, geography, and year. Ultimately, outliers are identified based on the judgement of the modeller and senior faculty. Outlier decisions are reversible and may be revisited.

### Section 2.16: Causes of death data star rating calculation

GBD estimates are most accurate when computed with a full time series of complete VR with a low percentage of garbage codes. For GBD 2016, we developed a simple star-rating system from 0 to 5 to give a picture of the quality of data available in a given country over the full time series used in GBD estimates. Countries improve in the star rating as they increase availability, completeness, and detail of their mortality data and reduce the percentage of deaths coded to ill-defined garbage codes or highly aggregated causes (Appendix Figure 5).

To assign stars, we measure the proportion of deaths registered to a well-defined cause from 1980 to 2016. We call this proportion “percent well-certified”. We measure this proportion for each location-

year of VR and each VA study separately, and then combine the yearly measurements into a percent well-certified for the full time series.

For each year of VR, percent well-certified is:

$$pct_{wellcertified} = completeness \times (1 - pct_{majgarbage})$$

Where:

$$completeness = \frac{registered\ deaths}{GBD\ mortality\ envelope}$$

$$pct_{majgarbage} = \frac{deaths\ coded\ to\ level\ 1\ or\ 2\ garbage\ or\ highly\ aggregated\ cause}{registered\ deaths}$$

Simplifying this equation, one can see that in this case “percent well-certified” is simply the number of deaths that are registered to a well-defined cause (those codes which are not Level 1 or 2 garbage or highly aggregated) divided by the GBD mortality envelope.

ICD10 and ICD9 codes assigned to Level 1 or 2 garbage can be found in Appendix Table 4.

For each VA data source, percent well-certified is:

$$pct_{wellcertified} = VerbalAutopsyAdjustment \times (1 - pct_{majgarbage})$$

Where:

$$VerbalAutopsyAdjustment = SubAdj \times RegAdj \times AgeSexCoverage$$

And:

SubAdj:

10% for subnationally representative studies, 100% for nationally representative studies. This adjustment, while arbitrary in its specific value, reflects the bias that can be associated with studies that only cover a potentially non-representative sample of a country’s population.

RegAdj:

64% for all VA data sources. This accounts for the inaccuracy of VA in assigning CoD compared to medically verified VR. The specific multiplier 0.64 is based on the chance-corrected concordance of Physician Certified Verbal Autopsy (PCVA) versus medical certification by the Population Health Metrics Research Consortium.<sup>25</sup>

Age-Sex Coverage:

The number of deaths estimated in the GBD mortality envelope for the ages and sexes in the study for the country and year divided by the number of deaths estimated in the

GBD mortality envelope for the country and year. Studies that only cover children under 5 or maternal mortality, for example, will be highly discounted by this multiplier.

In the case of VA, all garbage codes are considered ill-defined, as redistribution for VA is highly imprecise. Causes such as “Injuries” or “Cancer” will also be included in major garbage percentage, as this percentage includes use of highly aggregated causes.

Once percent well-certified is calculated for each location-year of VR and each VA study-year, we then combine these into one measurement for each five-year time interval and the full time series 1980–2017. For each five-year time interval, we take the maximum percent well-certified. Then for 1980–2017, we take the average of the maximum percentages well-certified for the seven five-year time intervals, including any five-year time interval where no data were available as a zero.

Once these values are calculated, we assign stars as follows:

5 stars: 85%–100% well-certified

4 stars: 65%–84% well-certified

3 stars: 35%–64% well-certified

2 stars: 10%–34% well-certified

1 star: >0%–9% well-certified

0 stars: No VR or VA data available from 1980–2017

While stars are calculated for each five-year time interval, as well as the full time series from 1980 to 2017, stars in the main text are presented for the full time series only.

Appendix Table 7 shows the percent well-certified, stars, data source, and underlying values for percent well certified used for each country and time interval. Underlying indicators for the percent well-certified calculation are listed in Appendix Table 8.

## Section 3: Causes of death modeling methods

### Section 3.1: CODEm

#### Section 3.1.1: Overview of methods

CoD ensemble modelling (CODEm) is the framework used to model most cause-specific death rates in the GBD.<sup>26</sup> It relies on four key components:

First, all available data are identified and gathered to be used in the modelling process. Though the data may vary in quality, they all contain some signal of the true epidemiological process.

Second, a diverse set of plausible models are developed to capture well-documented associations in the estimates. Using a wide variety of individual models to create an ensemble predictive model has

been shown to outperform techniques using only a single model both in CoD estimation<sup>26</sup> and in more general prediction applications.<sup>27,28</sup>

Third, the out-of-sample predictive validity is assessed for all individual models, which are then ranked for use in the ensemble modelling stage.

Finally, differently weighted combinations of individual models are evaluated to select the ensemble model with the highest out-of-sample predictive validity.

For some causes (see, for example, “lower respiratory infections”), there is evidence that the relationship between covariates and death rates might differ between children and adults. Separate models are therefore run for different age ranges, when applicable. Additionally, separate models are developed for countries with extensive, complete, and representative VR for every cause to ensure that uncertainty can better reflect the more complete data in these locations.

### Section 3.1.2: Model pool development

Because many factors may covary with any given CoD, a range of plausible statistical models are developed for each cause. In the CODEm framework, four families of statistical models are used: linear mixed effects regression (LMER) models of the natural log of the cause-specific death rate, LMER models of the logit of the cause fraction, spatiotemporal Gaussian process regression (ST-GPR) models of the natural logarithm of the cause-specific death rate, and ST-GPR models of the logit of the cause fraction (see the 2x2 table in Foreman et al).<sup>26</sup> For each family of models, all plausible relationships between covariates and the response variable are identified. Because all possible combinations of selected covariates are considered for each family of models, multicollinearity between covariates may produce implausible signs on coefficients or unstable coefficients. Each combination is therefore tested for statistical significance (covariate coefficients must have a coefficient with p-value < 0.05) and plausibility (the coefficients must have the directions expected based on the literature). Only covariate combinations meeting these criteria are retained. This selection process is run for both cause fractions and death rates, then ST-GPR and LMER-only models are created for each set of covariates. For a detailed explanation of the covariate selection algorithm, see Foreman et al 2012.<sup>26</sup>

### Section 3.1.3: Data Variance Estimation

The families of models that go through ST-GPR described in Section 3.1.2 incorporate information about data variance. The main inputs for a Gaussian process regression (GPR) are a mean function, a covariance function, and data variance for each data point. These inputs are described in detail in Foreman et al 2012.<sup>26</sup> For GBD 2017, we have updated this calculation to incorporate garbage code redistribution uncertainty.

There are now three components of data variance used in CODEm: sampling variance, non-sampling variance, and garbage code redistribution variance. The computation of sampling variance and non-sampling variance have not changed since previous iterations of the GBD and are also described in Foreman et al 2012.<sup>26</sup> Garbage code redistribution variance is computed in the cause of death database process described in Section 2.7 of this appendix. Since variance is additive, we calculate

total data variance as the sum of sampling variance, non-sampling variance, and redistribution variance. Increased data variance in GPR results in the GPR draws not following the data point as closely.

#### Section 3.1.4: Testing model pool on 15% sample

The performance of all models (individual and ensemble) is evaluated using out-of-sample predictive validity tests. Thirty percent of the data are excluded from the initial model fits. These individual model fits are evaluated and ranked using half of the excluded data (15% of the total), then used to construct the ensembles based on their performance. Data are held out from the analysis based on the cause-specific missingness patterns for ages and years across locations. Out-of-sample predictive validity testing is repeated 20 times for each model, which has been shown to produce stable results.<sup>26</sup> These performance tests include the root mean square error (RMSE) for the log of the cause-specific death rate, the direction of the predicted versus actual trend in the data, and the coverage of the predicted 95% UI.

#### Section 3.1.5: Ensemble development and testing

The component models are weighted based on their predictive validity rank in order to determine their contribution to the ensemble estimate. The relative weights are determined both by the model ranks and by a parameter  $\psi$ , whose value determines how quickly the weights taper off as rank decreases. The distribution of  $\psi$  is described in more detail in Foreman et al 2012.<sup>26</sup> A set of ensemble models is then created using the weights constructed from the combinations of ranks and  $\psi$  values. These ensembles are tested using the predictive validity metrics described in Section 3.1.3 on the remaining 15% of the data, and the ensemble with the best performance in out-of-sample trend and RMSE is chosen as the final model.

#### Section 3.1.6: Final Estimation

Once a weighting scheme has been chosen, 1,000 draws are created for the final ensemble, with the number of draws contributed by each model proportional to its weight. The mean of the draws is used as the final estimate for the CODEm process, and a 95% uncertainty interval (UI) is created from the 0.025 and 0.975 quantiles of the draws. The validity of the UI can be checked via its coverage of the out-of-sample data; ideally, the 95% UI would capture 95% of these data. Higher coverage suggests that the UIs are too large, and lower coverage suggests overfitting.

#### Section 3.1.7: Selection of causes for which CODEm is used

CODEm is used to model 193 causes, described in detail below. However, it is unsuitable for use in modelling certain causes, including those with very low death counts, those where cause-specific death record availability is inadequate, or those for which there are marked biases or variability for CoD certification over time that cannot be fully accounted for with the current garbage code redistribution algorithms. Criteria for causes where CODEm is not used are discussed in further detail in Section 3.2.

### Section 3.1.8: Model-specific covariates

A table of CODEm covariates used, level of the covariate, and expected direction of the covariate by cause, sex, age, and location can be found in Appendix Table 9. Modelers select covariates to be used in CODEm, but those covariates may not be significant or in the direction specified during the covariate selection step of CODEm, and will therefore not be used in the model. These covariates are listed with a ‘—’ for number of draws. Additionally, covariates may be selected by CODEm, but only exist in submodels that perform poorly, and may end up with zero draws included in the final ensemble. Finally, all other covariates are listed with the number of draws in the final ensemble from submodels that had the covariate. A comparison of GBD 2016 and GBD 2017 covariates using CoD modeling is provided in Appendix Table 10.

### Section 3.1.9: Fit statistics for CODEm models

A table of CODEm predictive validity results by cause, sex, and, and location can be found in Appendix Table 11.

## Section 3.2: Causes modeled outside of CODEm

### Section 3.2.1: Overview

A number of causes required alternative modelling strategies to those used for CODEm, as they were not compatible with CODEm estimation infrastructure and processes. Such unsuitability included having very low death counts; inadequate availability of cause-specific death records; and marked biases or variability for CoD certification over time which could not be fully accounted for with current garbage code redistribution algorithms. The inclusion of these causes in CODEm often renders its out-of-sample predictive validity testing, a key advantage of using CODEm for CoD estimation, unstable, or CODEm simply fails to generate plausible mortality rates in the absence of enough VR or VA data. Due to increased data availability and redistribution algorithm refinements, we were able to incorporate several new causes, which were modelled separately for GBD 2013, into CODEm for this iteration of the GBD study; with each annual update of GBD, we aim to add more causes within the CODEm estimation space. For GBD 2017, we used alternative modelling approaches for these causes, including negative binomial models, natural history models, sub-cause proportion models, and prevalence-based model (Appendix Table 12) A full list of causes in GBD 2017 can be found in Appendix Table 13.

### Section 3.2.2: Negative binomial models

For eight rare causes of death, there were too few observed deaths in the CoD database to produce stable estimates. For these causes, we ran negative binomial regression models with either a constant or constant multiplied by the mean assumption for the dispersion parameter, using reverse step-wise model building. We selected between the two model dispersion assumptions on the basis of best fit to the data, using the same method as GBD 2013. For GBD 2015 we also tested zero-inflated Poisson models for these rare causes of death, but rejected them after finding that they did not substantially affect the mean predictions but produced unrealistically large UIs. Descriptions of the modelling process for each of these causes follow.

### Section 3.2.3: DisMod-MR 2.1

Until GBD 2010, non-fatal estimates were based on a single data source on prevalence, incidence, remission, or a mortality risk selected by the researcher as most relevant to a particular location and time. For GBD 2010, we set a more ambitious goal: to evaluate all available information on a disease that passes a minimum quality standard. That required a different analytical tool that would be able to pool disparate information presented in varying age groupings and from data sources using different methods. The DisMod-MR 1.0 tool used in GBD 2010 evaluated and pooled all available data, adjusted data for systematic bias associated with methods that varied from the reference and produced estimates by world regions with uncertainty intervals. For GBD 2013, the improved DisMod-MR 2.0 had increased computational speed, allowing computations that were consistent between all disease parameters at the country rather than region level. The hundred-fold increase in speed of DisMod-MR 2.0 was partly due to a more efficient rewrite of the code in C++ but also by changing to a model specification using log rates rather than a negative binomial model used in DisMod-MR 1.0. In cross-validation tests, the log rates specification worked as well or better than the negative binomial specification.<sup>29</sup> For GBD 2015, the computational engine (DisMod-MR 2.1) remained substantively unchanged but we re-wrote the “wrapper” code that organised the flow of data and settings at each level of the analytical cascade. The sequence of estimation occurred at five levels: global, super-region, region, country, and, where applicable, subnational locations (see flow diagram of DisMod-MR 2.1 cascade, below). The super-region priors were generated at the global level with mixed-effects, non-linear regression using all available data; the super-region fit, in turn, informed the region fit, and so on down the cascade. The wrapper gave analysts the choice to branch the cascade in terms of time and sex at different levels depending on data density. The default used in most models was to branch by sex after the global fit but to retain all years of data until the lowest level in the cascade. For GBD 2015, we generated fits for the years 1990, 1995, 2000, 2005, 2010, and 2015.

In updating the “wrapper,” we consolidated the code base into a single language, Python, to make the code more transparent and efficient and to better deal with subnational estimation. The computational engine is limited to three levels of random effects; we differentiated estimates at the super-region, region, and country levels. In GBD 2013, the subnational units of China, Mexico, and the UK were treated as “countries” such that a random effect was estimated for every location with contributing data. However, the lack of a hierarchy between country and subnational units meant that the fit to country data contributed as much to the estimation of a subnational unit as the fits for all other countries in the region. We found inconsistency between the country fit and the aggregation of subnational estimates when the country’s epidemiology varied from the average of the region. Adding an additional level of random effects required a prohibitively comprehensive rewrite of the underlying DisMod-MR engine. Instead, we added a fifth layer to the cascade, with subnational estimation informed by the country fit and country covariates, plus an adjustment based on the average of the residuals between the subnational unit’s available data and its prior. This mimicked the impact of a random effect on estimates between subnationals.



For GBD 2015 we improved how country covariates differentiate non-fatal estimates for diseases with sparse data. The coefficients for country covariates were re-estimated at each level of the cascade. For a given location, country coefficients were calculated using both data and prior information available for that location. In the absence of data, the coefficient of its parent location was chosen in order to utilise the predictive power of our covariates in data sparse situations.

For GBD 2017, the DisMod-MR 2.1 tool was used. Updates included estimation of new age groups through the GBD 2017 terminal age group of 95+, in addition to the new locations added for the GBD 2017 cycle. Please see Appendix Figure 7 for details of the GBD 2017 DisMod-MR 2.1 analytical cascade.

### *DisMod-MR 2.1 likelihood estimation*

Analysts have the choice of using a Gaussian, log-Gaussian, Laplace, or log-Laplace likelihood function in DisMod-MR 2.1. The default log-Gaussian equation for the data likelihood is:

$$-\log[p(y_j|\Phi)] = \log(\sqrt{2\pi}) + \log(\delta_j + s_j) + \frac{1}{2} \left( \frac{\log(a_j + \eta_j) - \log(m_j + \eta_j)}{\delta_j + s_j} \right)^2$$

Where:

$y_j$  is a “measurement value” (ie, data point)

$\Phi$  denotes all model random variables

$\eta_j$  is the offset value, eta, for a particular “integrand” (prevalence, incidence, remission, excess mortality rate, with-condition mortality rate, cause-specific mortality rate, relative risk, or standardised mortality ratio)

$a_j$  is the adjusted measurement for data point  $j$ , defined by:

$$a_j = e^{(-u_j - c_j)} y_j$$

Where:

$u_j$  is the total “area effect” (ie, the sum of the random effects at three levels of the cascade: super-region, region, and country)

$c_j$  is the total covariate effect (ie, the mean combined fixed effects for sex, study-level, and country-level covariates), defined by:

$$c_j = \sum_{k=0}^{K[I(j)]-1} \beta_{I(j),k} \hat{X}_{k,j}$$

with standard deviation

$$s_j = \sum_{l=0}^{L[I(j)]-1} \zeta_{I(j),l} \hat{Z}_{k,j}$$

Where:

$k$  denotes the mean value of each data point in relation to a covariate (also called x-covariate)

$I(j)$  denotes a data point for a particular integrand,  $j$

$\beta_{I(j),k}$  is the multiplier of the  $k^{\text{th}}$  x-covariate for the  $i^{\text{th}}$  integrand

$\hat{X}_{k,j}$  is the covariate value corresponding to the data point  $j$  for covariate  $k$

$l$  denotes the standard deviation of each data point in relation to a covariate (also called z-covariate)

$\zeta_{I(j),k}$  is the multiplier of the  $l^{\text{th}}$  z-covariate for the  $i^{\text{th}}$  integrand

$\delta_j$  is the standard deviation for adjusted measurement  $j$ , defined by:

$$\delta_j = \log[y_j + e^{(-u_j - c_j)} \eta_j + c_j] - \log[y_j + e^{(-u_j - c_j)} \eta_j]$$

Where  $m_j$  denotes the model for the  $j^{\text{th}}$  measurement, not counting effects or measurement noise and defined by:

$$m_j = \frac{1}{B(j) - A(j)} \int_{A(j)}^{B(j)} I_j(a) da$$

Where:

$A(j)$  is the lower bound of the age range for a data point  $j$

$B(j)$  is the upper bound of the age range for a data point  $j$

$I(j)$  denotes the function of age corresponding to the integrand for data point  $j$

The source code for DisMod-MR 2.1 as well as the wrapper code are available at <http://ihmeuw.org/dismod-ode>.

### Section 3.2.4: Natural history models

For some causes where CoD data may be systematically biased due to either misclassification or because the disease exists in focal communities without VR or VA studies, we have developed natural history models. In natural history models incidence and case-fatality rates are modelled separately and then combined to produce estimates of cause-specific mortality.

### Section 3.2.5: Prevalence-based models

The modelling strategies for atrial fibrillation and flutter are distinct from those used for other causes modelled as natural history models. These models use prevalence estimates and excess mortality rates (EMR) generated through DisMod-MR 2.1, rather than incidence and case-fatality rates.

### Section 3.2.6: Sub-cause proportion models

For certain sub-causes for which accurate diagnoses are known to be very difficult, we first modelled the parent cause in the GBD hierarchy with CODEm and then allocated deaths to specific causes using proportions of the parent cause for each age-sex-location-year for each sub-cause. For these causes, we identified no significant predictors in negative binomial regressions. This approach was taken because the available data on these specific causes may come from sources other than VR, such as end-stage renal disease registries, or come from too few places to model the death rates directly. Details for each cluster of causes analysed in this way are below.

## Section 3.3: CoD modeling descriptions

# HIV/AIDS

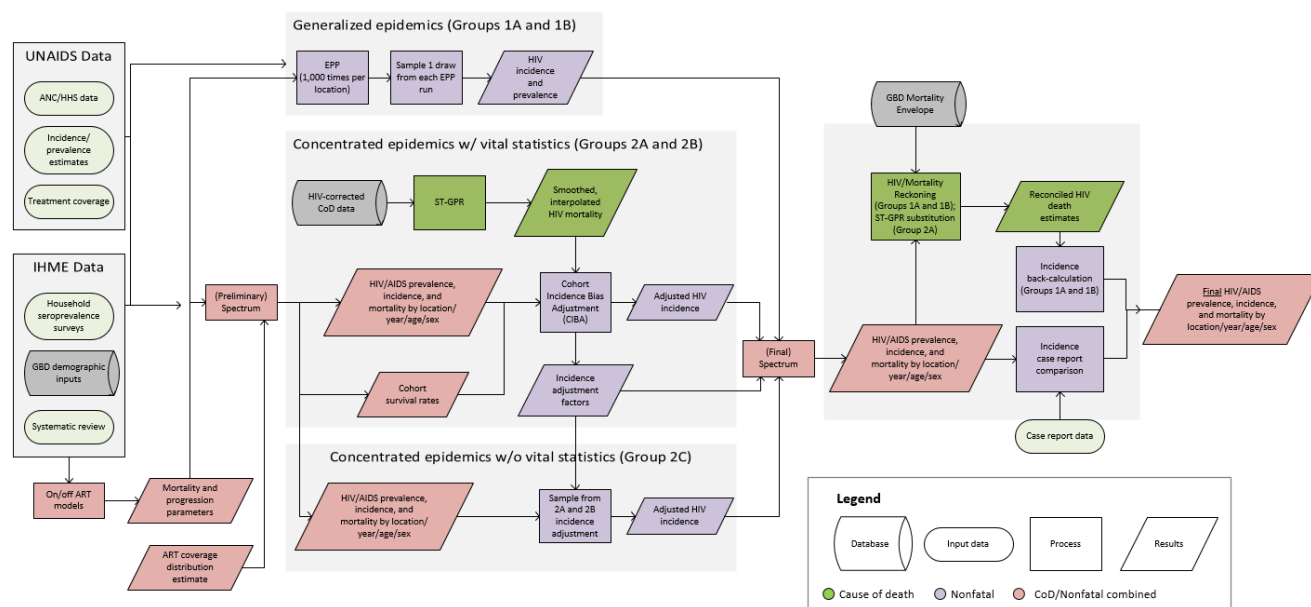

## Case definition

Infection with the human immunodeficiency virus (HIV) causes influenza-like symptoms during the acute period following infection and can lead to acquired immunodeficiency syndrome (AIDS) if untreated. HIV attacks the immune system of its host, leaving infected individuals more susceptible to opportunistic infections like tuberculosis. Although there are two different subtypes of HIV, HIV-1 and HIV-2, no distinction is made in our estimation process or presentation of results. For HIV, ICD 10 codes are B20-B24, C46-C469, D84.9; ICD 9 codes are 042-044, 112-118 (after 1980), 130 (after 1980), 136.3-136.8 (after 1980), 176.0-176.9 (after 1980), 279 (after 1980); and ICD9 BTL codes are B184-B185.

## Input data

### Household seroprevalence surveys

Geographically representative HIV seroprevalence survey results were used as inputs to the model for countries with generalised HIV epidemics where available.

### GBD demographic inputs

Location-specific population, fertility, and HIV-free survival rates from GBD 2017 and migration data from UNAIDS were used as inputs in modelling all locations.

### UNAIDS data

The files compiled by UNAIDS for their HIV/AIDS estimation process were our main source of data for producing estimates of HIV burden. These files are typically country-specific and contain both demographic data (population, fertility, migration, and HIV-free survival rates) and HIV-specific information. In all cases except migration, we substituted in our own, internally consistent demographic estimates. The HIV-specific information includes what is needed to run both the Spectrum and

Estimation and Projection Package (EPP) models. Spectrum requires the following input data: AIDS mortality among people living with HIV with and without ART, CD4 progression among people living with HIV not on ART, ART coverage among adults and children, Cotrimoxazole coverage among children, coverage of breastfeeding among women living with HIV, prevention of mother-to-child transmission coverage, and CD4 thresholds for treatment eligibility. EPP uses many of the same assumptions as Spectrum but fits a simpler model to HIV prevalence data from surveillance sites and representative surveys. Antenatal care (ANC), incidence, prevalence, and treatment coverage data from UNAIDS were used in modelling for all locations. We extracted all of these data from the proprietary format used by UNAIDS.

For GBD 2017, we received updated national-level files for 97 countries and updated subnational-level files for eight countries. For many of the GBD locations not covered by these files, we had UNAIDS files from an earlier year of estimation, which we used again. After combining, we were left with a set of 35 countries for which we have never received a UNAIDS file, many of them countries with small populations and/or low HIV prevalence. In those places, we generated regional averages of all needed inputs. This enabled us to run Spectrum for every GBD location.

In several cases, we have modified the structure or data in the UNAIDS files. In South Africa, Russia, Iran, New Zealand, Great Britain, Japan, Indonesia, Mexico, United States, Norway, Brazil, Ukraine, and China, which we estimate at the subnational level, we split the national-level UNAIDS file into subnational datasets using assumptions from GBD 2017 demographics and GBD 2016 HIV prevalence. We also estimate at the subnational level in Ethiopia, Kenya, and India, but have subnational-level UNAIDS files for these locations; however, in Kenya and India, we must split larger subnationals to more granular locations. The subnational locations in Ethiopia, Kenya, India, and South Africa are fit as separate subpopulations in EPP, so we extracted the prevalence data for the individual subnationals. In Benin, Côte d'Ivoire, Haiti, Moldova, Mozambique, Nigeria, Togo, Zambia, and Zimbabwe, the country files that we received from UNAIDS contained only subnational data without national-level aggregates. In these cases, we aggregated the UNAIDS files and ran EPP and Spectrum at the national level.

### **Vital registration data**

We used all available sources of vital registration and sample registration data from the GBD Causes of Death database after garbage code redistribution and HIV/AIDS mis-coding correction, except in Group 1A countries as described below.<sup>1,2</sup> There are two different cause of death data sources for HIV/AIDS in China: the Disease Surveillance Point (DSP) system and the Notifiable Infectious Disease Reporting (NIDR) system. Both systems are administered by the Chinese Center for Disease Control and Prevention, but the reported number of deaths due to HIV is significantly lower in DSP. Therefore, we have used the provincial-level ratio of deaths due to HIV/AIDS from NIDR to those from DSP, choosing the larger ratio between years 2013 and 2014, and scaled the reported deaths in the DSP system, which is in turn used in the spatiotemporal Gaussian process regression (ST-GPR).

### **On-ART literature data**

Data were identified by using search terms “HIV,” “mortality,” and “antiretroviral therapy” in PubMed searches across the literature. To be included, studies must include only HIV-positive people who receive antiretroviral therapy (ART) but who were ART-naïve prior to the study. In addition, studies must report either a duration-specific mortality proportion or a hazard ratio across age or sex, and must not include children.

For duration-specific survival data, studies must report uncertainty on mortality estimates or provide stratum-specific sample sizes and must include duration-specific data to allow for calculation of 0-6, 7-

12, or 13-24 month conditional mortality. In addition, studies must either report separate mortality and loss-to-follow-up (LTFU) curves, be corrected for LTFU using vital registration data or double sampling, or be conducted in a high-income setting. Finally, studies must report the percent of participants who are male and the median age of participants.

Hazard ratio data for ages or sexes can only be used if the hazard ratios are controlled for other variables of interest (age, sex, and CD4 category). In GBD 2013, we identified 102 papers for extraction. For GBD 2015, we included 13 additional studies informing the duration-specific mortality estimation process and 26 studies informing the age and sex hazard ratio estimation process (some studies were used and counted in both). We also added one study to our LTFU analysis. For GBD 2016, we included 12 additional studies informing the duration-specific mortality estimation process and 11 studies informing the age and sex hazard ratio estimation process (some studies were used and counted in both). For GBD 2017, we included 17 additional studies informing the duration-specific mortality estimation process and 13 studies informing the age and sex hazard ratio estimation process (some studies were used and counted in both). We also included two new studies in our LTFU analysis.

### Off-ART literature data

In GBD 2013, to characterise uncertainty in the progression and death rates, we systematically reviewed the literature on mortality without ART. We searched terms related to pre-ART or ART-naïve survival since seroconversion.<sup>3</sup> After screening, we identified 13 cohort studies that included the cohorts used by UNAIDS, from which we extracted survival at each one-year point after infection. Screening for additional, recently published studies in GBD 2015, GBD 2016 and GBD 2017 identified no new cohort studies for inclusion in this analysis.

### Severity splits and disability weights

The basis of the GBD disability weight survey assessments are lay descriptions of sequelae highlighting major functional consequences and symptoms. The lay descriptions and disability weights for HIV/AIDS severity levels are shown below.

| Severity level                        | Lay description                                                                                                  | DW (95% CI)            |
|---------------------------------------|------------------------------------------------------------------------------------------------------------------|------------------------|
| Symptomatic HIV                       | Has weight loss, fatigue, and frequent infections.                                                               | 0.274<br>(0.184–0.377) |
| AIDS with antiretroviral treatment    | Has occasional fevers and infections. The person takes daily medication that sometimes causes diarrhoea.         | 0.078<br>(0.052–0.111) |
| AIDS without antiretroviral treatment | Has severe weight loss, weakness, fatigue, cough and fever, and frequent infections, skin rashes, and diarrhoea. | 0.582<br>(0.406–0.743) |

The proportion of people living with HIV/AIDS who are being treated with antiretroviral therapy is an output of Spectrum, the compartmental model used to make consistent incidence, prevalence, and mortality estimates described below.

## Modelling strategy

In GBD 2017, our general modelling strategy for estimating HIV incidence, prevalence, and mortality is very similar to the strategy used in GBD 2016. We continue to use the Spectrum program rewritten in Python for GBD 2013 to facilitate faster and more flexible execution necessary for our more intensive computational needs. We made several changes to the modelling strategy in Spectrum comparing to the Spectrum software used by UNAIDS. We also, again, ran EPP using an open-source computer program in R written by Jeffrey Eaton.<sup>4</sup> We ran EPP for all Group 1 countries in order to produce incidence and prevalence estimates that were consistent with the demographic and epidemiological assumptions used in GBD 2017.

### On-ART

First, we corrected reported probabilities of death for loss to follow-up using an update of the approach developed by Verguet and colleagues.<sup>5</sup> Verguet and colleagues used tracing and follow-up studies to empirically estimate the relationship between death in LTFU and the rate of LTFU.

To create estimates of age-specific hazard ratios, we synthesised hazard ratio data in five broad age groups: 15-25, 25-35, 35-45, 45-55, 55-100, and modelled the data using DisMod-MR 2.1.

To create estimates of sex-specific hazard ratios, we use the *metan* function in Stata to create estimates of relative risks separately by region, using female age groups as the reference group.

The age and sex hazard ratios were applied to the study-level mortality rates, accounting for the distribution of ages and sexes in the mortality data. We then subtracted HIV-free mortality from the model life table process to calculate study-level age-sex HIV-specific mortality.

We used DisMod-MR 2.1 to synthesise the age-sex-split study-level data into estimates of conditional probability of death over initial CD4 count.<sup>3</sup> We modelled the data separately by duration, age, sex, and region and added a fixed effect on whether the study was conducted prior to 2002. Finally, we replaced our on-ART mortality rates with those estimated off treatment if they were higher.

### Off-ART

Following UNAIDS assumptions, no-ART mortality is modelled as shown in the figure below.<sup>3</sup>

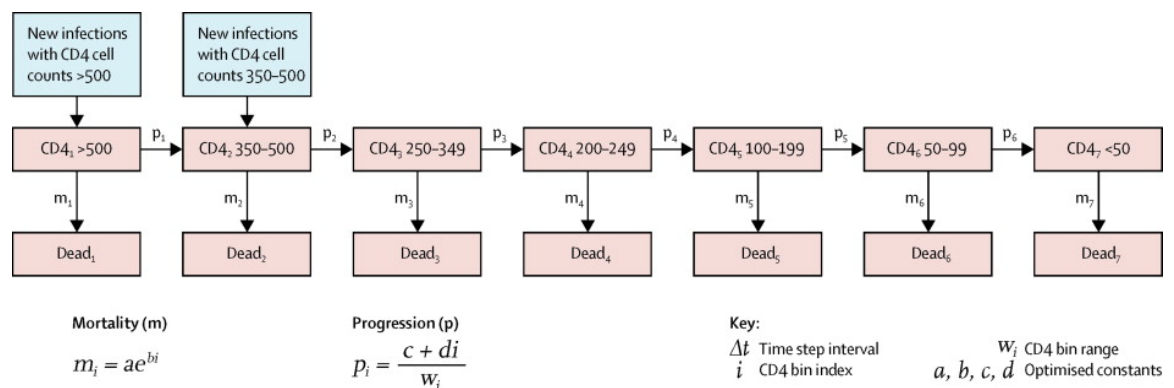

The death and progression rates between CD4 categories vary by age according to four age groups: 15–24 years, 25–34 years, 35–44 years, and 45 years or older. We modelled the logit of the conditional probability of death between years in these studies using the following formula:



$$\text{logit}(m_{jk}) = \beta_0 + \sum_{i=1}^4 \beta_{1i} a_i + \sum_{j=1}^{12} \beta_{2j} t_j + u_k + \varepsilon_{jk}$$

In the formula,  $m$  is conditional probability of death from year  $t_j$  to  $t_{j+1}$ ,  $a_i$  is an indicator variable for age group at seroconversion (15–24 years, 25–34 years, 35–44 years, and 45 years or older),  $t_j$  is an indicator variable of year since seroconversion, and  $u_k$  is a study-level random effect.

By sampling the variance-covariance matrix of the regression coefficients and the study-level random effect, we generated 1,000 survival curves for each age group that capture the systematic variation in survival across the available studies. For each of the 1,000 survival curves, we used a framework modelled after the UNAIDS optimisation framework in which we find a set of progression and death rates that minimises the sum of the squared errors for the fit to the survival curve.<sup>8,9</sup>

### Changes for GBD 2017

In GBD 2017, we chose to estimate mortality for each region in its own DisMod model, whereas previous GBD iterations estimated all regions together with fixed effects. This change was driven by new results from the IeDEA cohort collaboration, which provided enough data to estimate mortality trends by CD4 in each region separately.<sup>6</sup> We also added a year covariate to our LTFU model reflecting evidence from a large meta-analysis by Zurcher and colleagues, which showed that mortality among the LTFU has declined in recent years.<sup>7</sup> Finally we replaced our estimated on-ART mortality rates by rates off ART, accounting for progression to lower CD4 categories, if the on-ART rates were higher. This was done to ensure individuals would not experience higher mortality when they entered treatment in Spectrum.

### Burden estimation overview

UNAIDS uses two key analytical components in their epidemiological estimation. EPP is used to estimate incidence and prevalence trajectories that are consistent with prevalence surveys and other prevalence measurements such as antenatal clinic serosurveillance. Spectrum is a compartmental HIV progression model used to generate age-specific incidence, prevalence, and death rates from the EPP incidence and prevalence curves and assumptions about intervention scale-up and local variation in epidemiology.

Due to the substantial differences in the quality and types of data available across different countries, we used three different methodologies to produce year-, age-, and sex-specific estimates of HIV incidence, prevalence, and mortality. All three methodologies incorporate Spectrum to produce final estimates of disease burden and mortality.

### Spectrum

For GBD 2013, we created an exact replica of Spectrum in Python. This enabled us to run thousands of iterations of the model at once on our computing cluster and allowed for more flexible input data structures. Additionally, in order to generate estimates with more realistic ranges of uncertainty than those in UNAIDS 2012, we adjusted all input data by uniformly sampled factors between 0.9 and 1.1. These changes, along with our new estimation of with- and without-ART mortality and CD4 progression parameters, persist into GBD 2017.

### Changes for GBD 2017

For GBD 2017, we implemented a new approach to address selection bias resulting from temporal and geographic variation in ANC reporting, which has the potential to skew unadjusted estimates, especially

early in the epidemic when there are no nationally representative prevalence surveys to anchor estimates.<sup>14</sup> To address this issue, the specification of the likelihood of observed ANC clinic data within EPP includes random intercepts for each clinic. While this approach largely accounts for differences in level between clinics, it does not impact the estimated shape of the epidemic. In order to leverage available information from nearby geographies, we developed a model for data imputation which establishes an epidemic peak from a first-stage model fit to ANC clinic data from a location and its nearest neighbours. The model included random effects for country, clinic, and time. The year of the largest random effect was used as  $t_{max}$ , the location of a single knot in an imputation model which predicted the logit of prevalence in each year for a clinic as a linear spline. We can write this method mathematically in the following way:

$$\begin{aligned} \text{logit}(\rho_i(t)) &= \beta_0 + S(t) + \beta_3 X_i + \epsilon \\ S(t) &= \beta_1 S_1(t) + \beta_2 S_2(t) \\ S_1(t) &= \begin{cases} t_{max} - t & t \leq t_{max} \\ 0 & t > t_{max} \end{cases} \\ S_2(t) &= \begin{cases} t - t_{max} & t \geq t_{max} \\ 0 & t < t_{max} \end{cases} \end{aligned}$$

One thousand draws of imputed clinic prevalence, accounting for covariance between predictors, were generated for clinic-years where at least one clinic had an observation in a given year. These draws were used for each of the 1,000 EPP runs we ran for each location.

Additionally, for GBD 2017 we improved our sex-specific modelling strategy in Spectrum by sex-splitting incidence based on a model fit to the sex ratio of prevalence observed in countries with representative surveys. We also updated the Spectrum pediatric module to reflect changes made by UNAIDS.<sup>10</sup> Our child module was revised to include CD4 progression and CD4-specific mortality rates taken from a model fit to survival data from IeDEA. We also updated child initiation of ART to include data on ART distribution from IeDEA.

### **ART coverage distribution**

In UNAIDS' implementation of Spectrum, initiation of ART is constrained by eligibility criteria and distributed across CD4 count groups according to both the expected number of deaths and the number of people in each untreated CD4 count group – groups with a large proportion of PLHIV and high numbers of expected deaths initiated the most individuals into treatment. Three surveys were available at the time of publication that contained questions which can help inform the CD4 count distribution of ART coverage, Uganda AIS 2011 and Kenya AIS 2007 and 2012. Both of these surveys conducted CD4 count measurements and include a question regarding the amount of time that an individual receiving ART had been enrolled in treatment. Survey data provide cross-sectional CD4 count information; however, the Spectrum modelling framework tracks individuals by categorical CD4 count at the initiation of treatment. In order to cross-walk the cross-sectional survey data into estimates of CD4 count at treatment initiation, we built a model using relevant cohort data which tracked changes in CD4 count after initiation of treatment to translate an individual's current CD4 count and duration on treatment into CD4 count at initiation of treatment. The functional form for changes in CD4 count as a function of duration on treatment was a natural spline on duration with knots at 3, 12, 24 and 36 months, and an interaction between initial CD4 count and duration.

After cross-walking, we predicted the probability of being on treatment as a function of individual income (measured through an asset-based index), stratified by CD4 count, age, and sex. The results of this prediction were translated into country-specific age-sex-year-CD4 count probabilities of coverage using a conversion factor between individual income and LDI. We used stochastic frontier analysis to constrain the maximum possible coverage for a given degree of income and CD4 count. Predicted probabilities of coverage were input to Spectrum to inform the distribution, and not the overall level, of ART treatment by CD4 count. Spectrum converted counts of expected individuals on treatment in each CD4 count group and scaled the distribution across CD4 count groups to match the input data on the number of people on ART coming from UNAIDS country files. In cases where the predicted number of individuals initiating treatment exceeds the total number of untreated individuals in a CD4 count group, we reallocate treatment evenly to other CD4 count groups.

### **Countries with seroprevalence surveys and antenatal clinic data (Groups 1A and 1B)**

We identified 50 countries – as well as subnational locations in India, Kenya, Ethiopia, and South Africa – with at least 0.5% adult HIV prevalence and at least one geographically representative HIV seroprevalence survey or available antenatal care clinic (ANC) data. In order to ensure that our estimates of incidence and prevalence in these places were consistent with our estimates of HIV progression, we used a version of EPP written in R and C++ by Jeffrey Eaton to create new fits to the available prevalence data. The version of EPP used in GBD 2017 was updated in 2017 by Jeffrey Eaton. In this new version, an ANC prevalence adjustment was included and incorporated with the 2016 lookup database for the relative risk between pregnant women and the whole adult population, and an additional parameter to estimate ANC variance inflation was included as well.

For adjusting ANC data to align with the national 15–49 both sexes population, we extracted data on HIV prevalence among pregnant women who gave birth within the last year and attended an ANC clinic, from available DHS surveys. A simple model with regional random effects was run to generate location-specific prior distributions for the ANC bias adjustment where surveys were available, and regional priors for locations without a survey. The adjustment using a time-series of relative risk between pregnant women and the adult population was removed, and the ANC bias parameter was changed to account for all of the biases observed between these two populations.

In the new version of EPP, in addition to the equilibrium prior assumption of the force of infection in projection, a random walk approach is available as an alternative method. There were two locations, Madagascar and Papua New Guinea, which had no prevalence surveys and an increasing trend in ANC data. We chose the random walk approach to project the force of infection for these locations. We assumed the change of the log-scaled force of infection was following a normal distribution with mean equal to the median of the change of the modelled force of infection among the years having ART implemented or prevalence data, and the SD was equal to the default setting as the mean SD of the change of the modelled force of infections among the years having prevalence data. The projection year was chosen from the most recent year between the year with the lowest model force of infection and the year of the second latest survey data.

In the new EPP code, an optimisation step was added into IMIS function to speed up the parameter sampling step based on Raftery and Bao.<sup>11</sup> Two optimisation methods have been introduced. The main algorithm is Broyden–Fletcher–Goldfarb–Shanno (BFGS) optimization. If BFGS fails, Nelder-Mead optimum is used instead. In our 2016 EPP model, by substituting in our own assumptions about HIV progression rates and on/off ART mortality, we were able to ensure that the implied relationship between incidence and mortality/prevalence in EPP is similar to that in Spectrum.

To incorporate uncertainty in our mortality and progression parameters, we run EPP with separate draws of each of these parameters. This process produced 1,000 sets of EPP output for each of the locations that make up the 48 countries in the group. Every set of EPP outputs contains 500 consistent draws of HIV incidence and prevalence in adults aged 15-49.

For every location in the group, we sampled one of the 500 incidence/prevalence draws from each of the sets of EPP results. By sampling one draw from each set, we ensured that the distribution of progression parameters dictating the relationship between incidence and prevalence was exactly the same as the distribution of the sorted parameters generated in the previous step. At the end of this process, for every location in the set of 48 countries, we were left with 1,000 linked draws of adult incidence and prevalence and the exact mortality and progression parameters that generated those draws. We then ran these results, along with the previously described demographic and HIV-specific inputs, through Spectrum to produce location-, year-, age-, and sex-specific estimates of HIV incidence, prevalence, and mortality.

The HIV/mortality reckoning process is intended as a method of reconciling separate estimates of HIV mortality (and its resulting effect on estimates of HIV-free and all-cause mortality) in Group 1 countries by averaging estimates of HIV mortality from the model life table process and EPP-Spectrum. Additional details on the reckoning can be found in the GBD 2017 mortality manuscript.<sup>12</sup>

Since Spectrum produces HIV incidence, prevalence, and deaths that are consistent with one another over time, the reckoning process results in death numbers that are no longer consistent with the incidence and prevalence produced in Spectrum. In order to recreate this consistency, we recalculated incidence for all Group 1 locations using the difference between reckoned deaths and deaths produced by Spectrum. The updated incidence is calculated by aggregating counts of new infections, HIV deaths from Spectrum, and HIV deaths after reckoning at the year-sex level. The difference between reckoned HIV deaths and HIV deaths from Spectrum is added to Spectrum incidence, and we calculate the ratio between updated incidence and Spectrum incidence. Age-specific counts of new infections are then scaled by their corresponding sex-year ratios.

### **Countries with vital registration data (Group 2A and 2B)**

Vital registration is one of the highest-quality sources of data on HIV burden in many countries, so generating estimates that are consistent with these data with necessary adjustment to account for any potential underreporting is critical. We identified 122 countries – as well as 578 subnational locations from China, Japan, Indonesia, India, Mexico, Sweden, the United Kingdom, Ukraine, Russia, New Zealand, Iran, Norway and the United States – with usable points of vital registration data, verbal autopsy (VA) data, or sample registration system (SRS) data. In India, Vietnam and Indonesia, we used SRS and VA data, respectively, as input mortality for CIBA. For India we extracted the resulting age-sex distribution of incidence but scaled the level to match the adult incidence rate estimated from EPP for each state.

We imputed missing years of data to generate a complete time series for HIV from the estimated start year of the epidemic using ST-GPR. We analysed mortality trends using ST-GPR starting in 1981, the year that HIV was first identified in the United States.<sup>13</sup> For ST-GPR, we adjusted the lambda (time weight) and GPR scale according to the completeness of vital registration data, with 4- and 5-star quality VR using parameters designed to follow the data more closely. We produced separate splines by country/age group, up to the peak year of death rate. We then ran a linear regression with fixed effects on region, age, and sex. Following this, we ran space-time residual smoothing, in which time, age, and space weights are used to inform smoothing of the residuals between data points and the linear

regression estimate. From this process, we generated space-time estimates with the applied weights, along with the median absolute deviation (MAD) of the space-time estimates from the data. The MAD was calculated at various levels of the geographic hierarchy (eg, subnational and national), and was added into the data variance term. The data variance and space-time estimates were then analysed using Gaussian process regression to return a final estimate of mortality along with uncertainty.

Although Spectrum produces HIV mortality estimates that are within the realm of possibility in most countries using the incidence curves provided in the UNAIDS country files, it is a deterministic model that has not yet been integrated into an optimisable framework. Therefore, in order to “fit” it to vital registration data, we need to adjust input incidence.

To improve the fit of this process, in GBD 2015, we restructured Spectrum to track cohorts by year of HIV infection. With this version of Spectrum we can output, among many other metrics, HIV deaths by year, age, sex, and infection cohort. This enables us to adjust incidence to fit to death much more precisely and without making any rigid assumptions about the time from HIV infection to HIV death.

We have incorporated these improvements into a cohort incidence bias adjustment (CIBA) process. First, we ran Spectrum normally to produce 1,000 draws of incidence, prevalence, and mortality. Then, by year, age, and sex, we took the ratio of VR deaths to Spectrum deaths to quantify the amount of bias in Spectrum. Using draw-level duration data from the new version of Spectrum, for every year-, age-, and sex-specific infection cohort, we calculated the share of all HIV deaths observed over the course of the projection period in that cohort that would occur in each year after the year of infection. For example, projecting from 1970 through 2017, we identified the cohort of men infected in 1992 at the age of 16, calculated the total number of HIV deaths in that cohort in all subsequent years through the end of 2017, and divided the annual number of deaths by that total. This showed us the distribution of deaths among that cohort over the projection period. In the most extreme case (infections in 2016), we could only produce one point of that distribution (2017), so that single value is exactly 1.0; 100% of the deaths observed in that cohort occurred in 2017.

We then used these distributions of death to weigh the ratio of VR deaths to Spectrum deaths, meaning that ratios in the years where we expect the largest share of deaths were weighed most heavily. We then multiplied the initial size of that cohort from the normal run of Spectrum by the sum of the combined ratios to get a new estimate of new cases in that year/age/sex combination. We can write this method mathematically in the following way:

$$r_t = \frac{VR_t}{D_t}$$

$$\rho_t^{t-i} = \frac{d_t^{t-i}}{\sum_{k=t-i+1}^n d_k^{t-i}}$$

$$\alpha^{t-i} = \sum_{k=t-i+1}^n r_k * \rho_k^{t-i}$$

$$n_{\text{adjusted}}^{t-i} = \alpha^{t-i} * n^{t-i}$$

$VR_t$  is the number of HIV/AIDS deaths in year  $t$  from ST-GPR, and  $D_t$  is the number of HIV/AIDS deaths from the first run of Spectrum. In the second equation,  $d_t^{t-i}$  is the number of HIV/AIDS deaths among members of infection cohort  $t - i$  in year  $t$ , with  $i \geq 1$ , from the new, duration-tracking version of Spectrum, and  $n$  is final year of the projection. Therefore,  $\rho_t^{t-i}$  is the share of observed deaths in cohort  $t - i$  that we expect to occur in year  $t$ . It follows that  $\alpha^{t-i}$  is the weighted adjustment ratio described

above, which we multiply by the estimated initial size of infection cohort  $t - i$  as calculated in the first-stage Spectrum run to get the adjusted number of new cases,  $n_{\text{adjusted}}^{t-i}$ . This process is run separately for every sex, single-age, and draw.

CIBA allows ratios in each year after a given infection year to influence the final adjustment to incidence. The size of that influence is determined by the relative importance of that year in the cohort-year's distribution of deaths over time. The result is a new set of 1,000 draws of incidence and a set of 1,000 ratios of post-adjustment incidence to pre-adjustment incidence. We perform this adjustment using mean durations from the new version of Spectrum in order to try to shift the mean of the regular distribution of deaths.

Finally, to produce location-, year-, age-, and sex-specific estimates of HIV incidence, prevalence, and mortality, we ran the new estimates of incidence and all previously input data through Spectrum.

### **Countries without survey data and vital registration data (Group 2C)**

The remaining 30 countries – as well as Macau Special Administrative Region of China – had neither geographically representative seroprevalence surveys nor reliable vital registration systems. To produce estimates of HIV burden in these countries, we assumed that Spectrum is similarly biased as in other Group 2 countries within the same super-region. This involved running Spectrum, adjusting incidence using 1,000 adjustment ratios randomly sampled from CIBA results from the same super-region, and rerunning Spectrum using the new draws of adjusted incidence. As above, the estimates of incidence, prevalence, and mortality were incorporated into the rest of the machinery via the reckoning process.

### **References**

1. Global, regional, and national age–sex specific all-cause and cause-specific mortality for 240 causes of death, 1990–2013: a systematic analysis for the Global Burden of Disease Study 2013. *The Lancet* 2015; **385**: 117–71.
2. Birnbaum JK, Murray CJ, Lozano R. Exposing misclassified HIV/AIDS deaths in South Africa. *Bull World Health Organ* 2011; **89**: 278–85.
3. Murray CJL, Ortblad KF, Guinovart C, *et al.* Global, regional, and national incidence and mortality for HIV, tuberculosis, and malaria during 1990–2013: a systematic analysis for the Global Burden of Disease Study 2013. *The Lancet* 2014; **384**: 1005–70.
4. jeffeaton/epp. GitHub. <https://github.com/jeffeaton/epp> (accessed April 21, 2016).
5. Verguet S, Lim SS, Murray CJL, Gakidou E, Salomon JA. Incorporating Loss to Follow-up in Estimates of Survival Among HIV-Infected Individuals in Sub-Saharan Africa Enrolled in Antiretroviral Therapy Programs. *J Infect Dis* 2013; **207**: 72–9.
6. Andereg N, Johnson LF, Zaniewski E, *et al.* All-cause mortality in HIV-positive adults starting combination antiretroviral therapy: correcting for loss to follow-up. *AIDS* 2017; **31 Suppl 1**: S31-40.
7. Zürcher K, Mooser A, Andereg N, *et al.* Outcomes of HIV-positive patients lost to follow-up in African treatment programmes. *Trop Med Int Health* 2017; **22**: 375-387.

8. Ghys PD, Zaba B, Prins M. Survival and mortality of people infected with HIV in low and middle income countries: results from the extended ALPHA network. *AIDS Lond Engl* 2007; **21 Suppl 6**: S1–4.
9. Hallett TB, Zaba B, Todd J, *et al.*, ALPHA Network. Estimating incidence from prevalence in generalised HIV epidemics: methods and validation. *PLoS Med* 2008; **5**: e80.
10. Mahy M, Penazzato M, Ciaranello A, *et al.* Improving estimates of children living with HIV from the Spectrum AIDS Impact Model. *Aids* 2017;31: S13–S22
11. Raftery AE, Bao L. Estimating and Projecting Trends in HIV/AIDS Generalized Epidemics Using Incremental Mixture Importance Sampling. *Biometrics* 2010; **66**: 1162–73.
12. Wang H, Murray CJL, Carter A, He F. Global, regional, and national under-5 mortality, adult mortality, age-specific mortality, and life expectancy, 1970-2016: a systematic analysis for the Global Burden of Disease Study 2016. *The Lancet* 2017; **390**: 1151-1210.
13. CDC. Pneumocystis Pneumonia --- Los Angeles. *MMWR Wkly.* 1981; published online June 5. [http://www.cdc.gov/mmwr/preview/mmwrhtml/june\\_5.htm](http://www.cdc.gov/mmwr/preview/mmwrhtml/june_5.htm) (accessed April 21, 2016).
14. Ng M, Gakidou E, Murray CJL, Lim S. A comparison of missing data procedures for addressing selection bias in HIV sentinel surveillance data. *Population Health Metrics* 2013; **11**: 12.

# HIV/AIDS – Multidrug-resistant tuberculosis without extensive drug resistance, HIV/AIDS – Extensively drug-resistant tuberculosis, and HIV/AIDS – Drug-susceptible tuberculosis

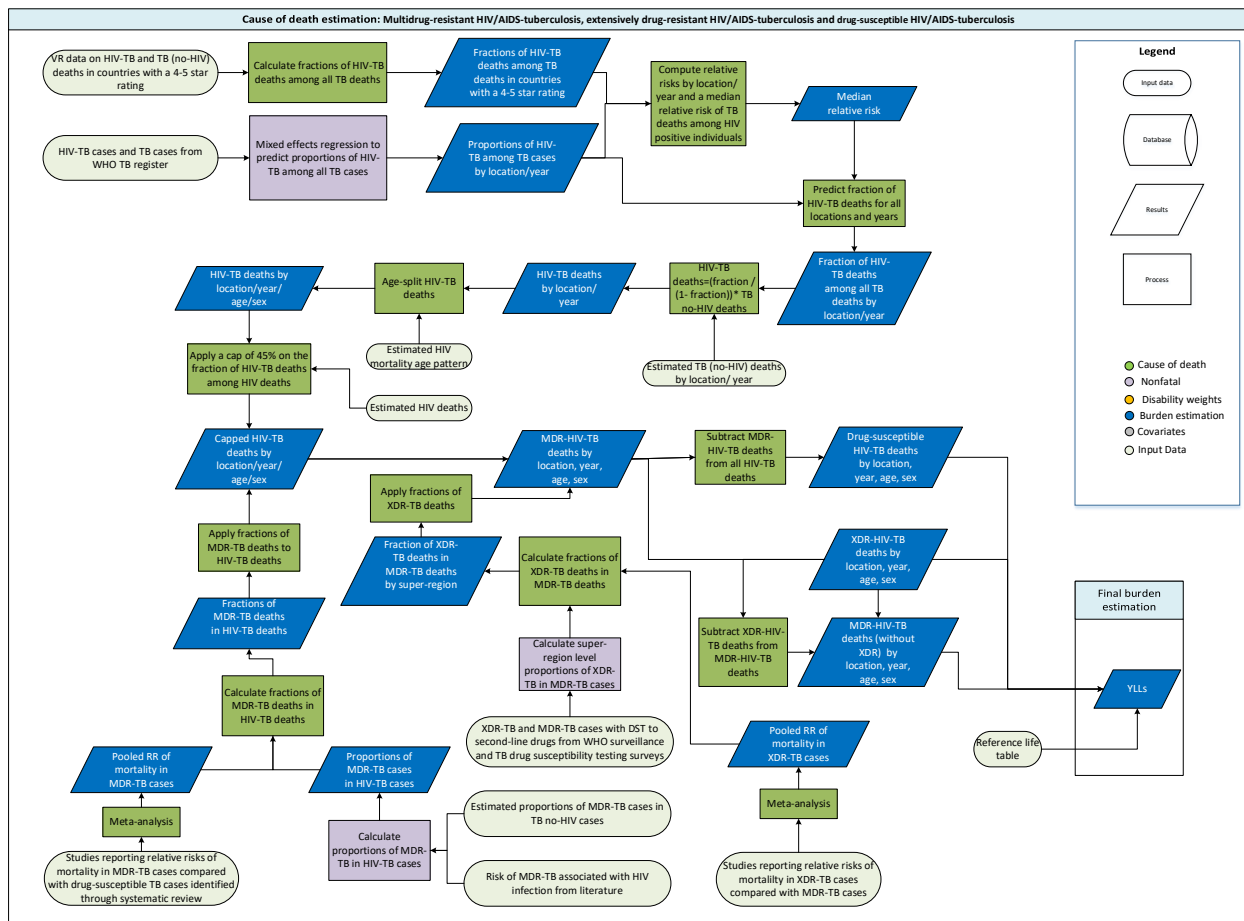

## Input data

Input data for HIV/AIDS-tuberculosis (HIV-TB) mortality estimation include (i) 438 site-years of vital registration data from countries with a four- or five-star rating where cause of death data for directly coded HIV-TB and tuberculosis (TB) were available, and (ii) the number of TB cases (new and re-treatment) recorded as HIV-positive and the number of TB cases (new and re-treatment) with an HIV test result recorded in the TB register from the World Health Organization (WHO). We excluded data from countries with ten HIV-TB deaths or less. We also excluded data that were largely conflicting with the majority of data for other years from the same country.

Input data for estimation of multidrug-resistant and extensively drug-resistant HIV-TB include: (i) the number of drug-resistant cases by type (multidrug-resistant tuberculosis [MDR-TB], extensively drug-resistant tuberculosis [XDR-TB], all TB cases with a drug sensitivity testing [DST] result for isoniazid and rifampicin, and MDR-TB cases with DST for second-line drugs) from routine surveillance and surveys reported to the World Health Organization. Additional input data include relative risks of mortality in MDR-TB cases compared with drug-susceptible TB cases, and relative risks of mortality in XDR-TB cases



compared with MDR-TB cases reported by studies identified through our systematic review, and the risk of MDR-TB associated with HIV infection from the literature.<sup>1</sup>

### Modelling strategy

To determine TB deaths in HIV-positive individuals, we first computed the fraction of HIV-TB deaths among all TB deaths using vital registration data from countries with a four- or five-star rating. We also calculated the proportion of TB cases that are HIV-positive (ie, number of TB cases recorded as HIV-positive/number of TB cases with an HIV test result recorded in the WHO TB register). We used these proportions as input data for a mixed effects regression to predict the proportions of HIV-TB cases among all TB cases for all locations and years using an adult HIV death rate covariate. We estimated the fraction of HIV-TB deaths among all TB deaths in each location and year ( $D_{c,y}$ ), defined by

$$D_{c,y} = \frac{P_{c,y}RR}{P_{c,y}RR + 1 - P_{c,y}}$$

where  $P_{c,y}$  is the proportion of HIV-TB cases among all TB cases and  $RR$  is the relative risk of TB deaths in HIV positive individuals, defined by:

$$RR = \frac{D_{c,y}P_{c,y} - D_{c,y}}{D_{c,y}P_{c,y} - P_{c,y}}$$

We took the median relative risk ( $RR$ ) from each calculation. We then applied the median  $RR$  and the predicted proportions of HIV-TB cases among all TB cases to get the fractions of HIV-TB deaths among all TB deaths for all locations and years. Location-year-specific HIV-TB deaths were then calculated using the following equation:

$$Deaths_{HIV-TB} = \frac{D_{c,y}}{1 - D_{c,y}} Deaths_{TB}$$

where  $Deaths_{TB}$  is location-year specific deaths from the CODEm TB no-HIV model. Finally, we applied the age-sex pattern of the HIV mortality estimates to these HIV-TB deaths to generate location-year-age-sex-specific HIV-TB deaths. As the HIV-TB deaths were estimated based on the fraction of HIV-TB deaths among all TB deaths, the total number of HIV-TB deaths could exceed the total number of HIV deaths in some locations. To avoid this, we applied a cap of 45% on the fraction of HIV-TB deaths among HIV deaths, based on a review by Cox and colleagues, 2010,<sup>2</sup> and a systematic review and meta-analysis by Ford and colleagues, 2016.<sup>3</sup>

To split HIV-TB into HIV-MDR-TB and HIV-drug-susceptible-TB, we first calculated the proportion of HIV-MDR-TB among all HIV-TB cases ( $P_{MDR-HIVc,y,a,s}$ ) for each location, year, age, and sex using the following formula:

$$P_{MDR-HIVc,y,a,s} = P_{MDRnoHIVc,y,a,s}RR_{HIV}$$

where  $P_{MDRnoHIVc,y,a,s}$  is the estimated proportion of MDR-TB among HIV-negative TB cases for each location, year, age, and sex (see MDR-TB modelling strategy for the detail) and  $RR_{HIV}$  is the relative risk of MDR-TB associated with HIV infection.

We then computed the fraction of HIV-MDR-TB deaths among all HIV-TB deaths ( $D_{MDR-HIVc,y,a,s}$ ) using the following formula:

$$D_{MDR-HIVc,y,a,s} = \frac{P_{MDR-HIVc,y,a,s}RR_{MDR}}{P_{MDR-HIVc,y,a,s}RR_{MDR} + 1 - P_{MDR-HIVc,y,a,s}}$$

where  $RR_{MDR}$  is the pooled relative risk of mortality in MDR-TB cases compared with drug-susceptible TB cases. We then applied the predicted HIV-MDR-TB death fractions to all HIV-TB death estimates to generate HIV-MDR-TB deaths by location, year, age, and sex. Next, we subtracted HIV-MDR-TB deaths from all HIV-TB deaths at the 1,000 draw level to generate drug-susceptible HIV-TB deaths by location, year, age, and sex.

To separate out HIV-XDR-TB from HIV-MDR-TB, we aggregated the XDR-TB cases and MDR-TB cases (with DST for second-line drugs) up to the super-region level and calculated the super-region-level proportions of XDR-TB among MDR-TB cases. Next, we computed the super-region-specific fraction of XDR-TB deaths among all MDR-TB deaths ( $D_{XDRst}$ ) using the following formula:

$$D_{XDRst} = \frac{P_{XDRst}RR_{XDR}}{P_{XDRst}RR_{XDR} + 1 - P_{XDRst}}$$

where  $P_{XDRst}$  is the proportion of XDR-TB among MDR-TB cases for each super-region, and  $RR_{XDR}$  is the pooled relative risk of mortality in XDR-TB cases compared with MDR-TB cases. These fractions were then applied to MDR-TB deaths in corresponding countries within the super-regions to produce XDR-TB deaths by location, age, and sex for the most recent year of estimation. We linearly extrapolated XDR-TB mortality rates back, assuming the mortality rates were zero in 1992, one year before 1993 when XDR-TB was first recorded in USA surveillance data.<sup>4</sup> Finally, we subtracted HIV-XDR-TB deaths from HIV-MDR-TB deaths to generate HIV-MDR-TB (without extensive drug resistance) deaths by location, year, age, and sex.

## References

1 Mesfin YM, Hailemariam D, Biadgign S, Kibret KT. Association between HIV/AIDS and multi-drug resistance tuberculosis: a systematic review and meta-analysis. PLoS One. 2014 Jan 8;9(1):e82235.

- 2 Cox JA, Lukande RL, Lucas S, Nelson AM, Van Marck E, Colebunders R. Autopsy causes of death in HIV-positive individuals in sub-Saharan Africa and correlation with clinical diagnoses. *AIDS Rev* 2010; **12**: 183–94.
- 3 Ford N, Matteelli A, Shubber Z, *et al.* TB as a cause of hospitalization and in-hospital mortality among people living with HIV worldwide: a systematic review and meta-analysis. *J Int AIDS Soc* 2016; **19**: 20714.
- 4 Centers for Disease Control and Prevention (CDC). Extensively Drug-Resistant Tuberculosis --- United States, 1993—2006. *MMWR*. 2007; 56(11);250-253

# Sexually Transmitted Infections Excluding HIV

Total sexually transmitted diseases (STI), chlamydia, gonorrhoea, syphilis, and other STI.

## Input data

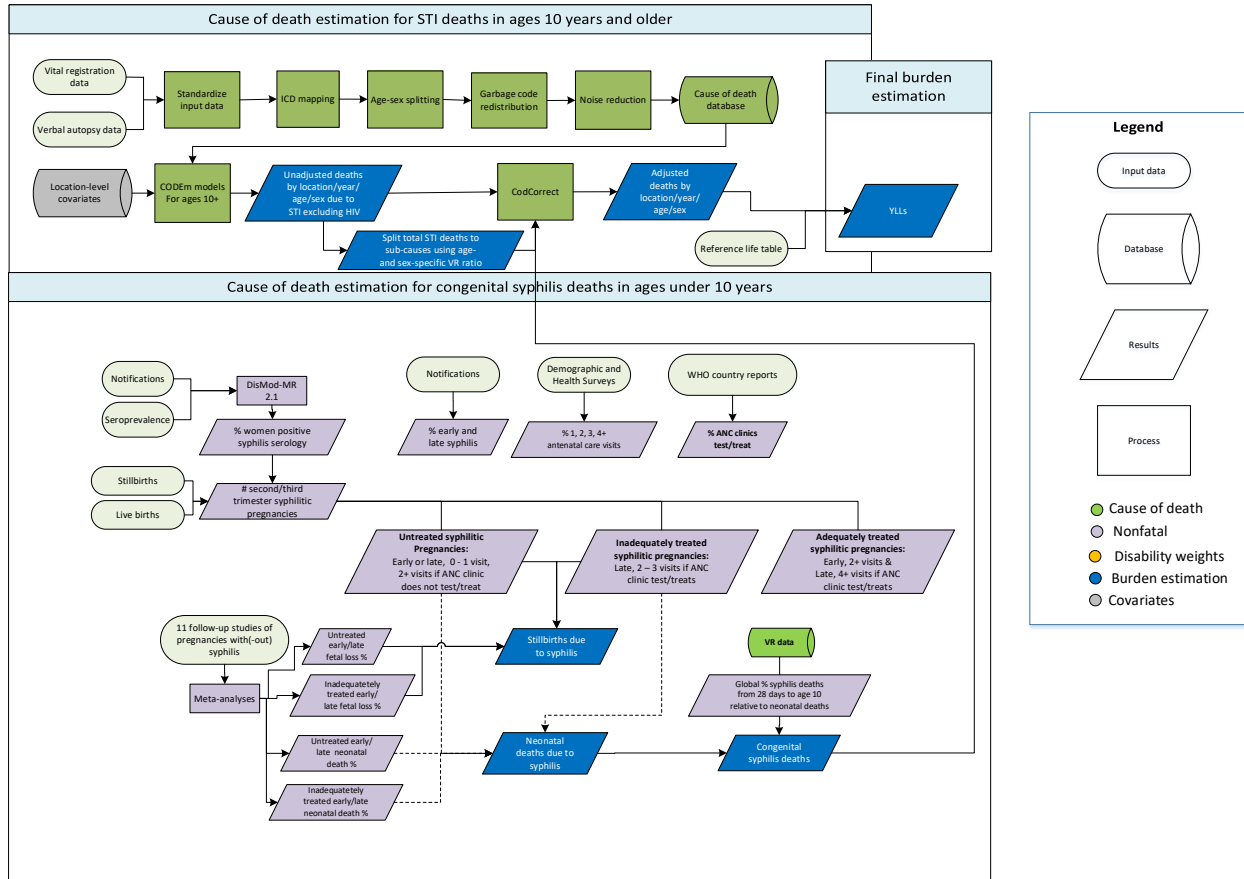

For GBD 2017, STI cause of death models included syphilis, chlamydial infection, gonococcal infection, and other STIs. CODEm models for males and females 10 years and older were informed from centrally processed data from the cause of death (COD) database. All data from all geographies were reviewed. Outliers were identified as those data where age patterns or temporal patterns were inconsistent with neighbouring age groups or locations or where sparse data were predicting implausible overall temporal or age patterns for a given location.

Four different types of data were used for the natural history model of congenital syphilis. First, we used notification and survey data to estimate the prevalence of a positive syphilis serology test in women of reproductive age in DisMod-MR 2.1. Second, we used estimates of the number of antenatal care (ANC) visits from Demographic and Health Surveys and live birth estimates from our demographic analyses. Third, we used published data from the Global Health Observatory on the proportion of ANC clinics that test for syphilis and the proportion of women testing positive who receive treatment. Fourth, we used

the results of meta-analyses on the increased risk of fetal loss and neonatal death in syphilitic women to inform the risk of fetal loss and neonatal mortality from pregnancies in women with syphilis.

### Modelling strategy

We completed data-rich (DR) and global CODEm models for ages 10 years and over for males and females separately. Ten covariates were used in each CODEm model, including 1) prevalence of positive syphilis serology in pregnancy from the DisMod-MR 2.1 analysis; 2) coverage of one antenatal care (ANC) visit; 3) coverage of four or more ANC visits; 4) age-specific fertility rate; 5) total fertility rate; 6) health system access, a principal components analysis of ANC, in-facility delivery, skilled birth attendance, and vaccine coverage; 7) health care access and quality index (HAQI), a measure of mortality amenable to health care, 8) national income per capita (LDI); 9) years of education per capita; and 10) abortion legality, an index that includes a categorical rating of abortion laws that range from 1 (always illegal) to 7 (always legal on demand).

Covariates are shown in the following table.

| Level | Covariate                            | Direction |
|-------|--------------------------------------|-----------|
| 1     | Syphilis prevalence                  | +         |
| 2     | Abortion legality                    | -         |
|       | Age-specific fertility rate          | +         |
|       | Education (years per capita)         | -         |
|       | Total fertility rate                 | +         |
|       | Health system access, capped         | -         |
|       | Health care access and quality index | -         |
| 3     | Antenatal care coverage, 1+ visits   | -         |
|       | Antenatal care coverage, 4+ visits   | -         |
|       | Lag-distributed income               | -         |

The overall CODEm model for STI was split into the sub-causes using vital registration (VR) data from the COD database. Trichomoniasis and HSV-2 were assumed not to cause mortality. Chlamydia was further assumed not to cause death in males. Cause-specific mortality rate VR data for each age group, sex, and year were summed and scaled to match the total STI cause-specific mortality rate predicted by CODEm. This global VR pattern was applied to all locations.

Our model for congenital syphilis deaths began with estimation of the prevalence of a positive syphilis serology in adults in DisMod-MR 2.1, restricting incidence to zero before the age of 10 and assuming no excess mortality. A positive non-treponemal test (RPR or VDRL) with confirmation by a treponemal test was chosen as the reference. Incidence data, primarily in the form of notifications, were ignored due to varying degrees of under-reporting that lead to irreconcilable differences between incidence and prevalence data. Study-level covariates for non-reference categories (pregnant, blood donors) and non-reference testing modalities (eg, treponemal test only, non-treponemal test only) were used to crosswalk to the reference category.

To account for differing access to testing and treatment across geographies in the seroprevalence model, consistent duration ranges were calculated using a sum of the duration of untreated and treated syphilis, weighted by the percent of individuals that are symptomatic and the probability of receiving treatment if symptomatic with the formula below. These estimates were taken from published numbers

$$\begin{aligned}
 \textit{Duration} &= (\% \textit{Symptomatic})(\textit{Prob}_{Rx})(\textit{Duration}_{Rx}) \\
 &+ (1 - \% \textit{Symptomatic})(\textit{Duration}_{not Rx}) \\
 &+ (\% \textit{Symptomatic})(1 - \textit{Prob}_{Rx})(\textit{Duration}_{not Rx})
 \end{aligned}$$

in GBD 2000 and WHO 2005, which were largely expert-driven. The probability of treatment if symptomatic was scaled using the Healthcare Access and Quality index (HAQI) to compute this probability for each location and year. Durations per stage (primary, secondary, latent, and tertiary) were calculated individually and summed along with the average seroreversion by stage, weighing by the proportion of cases remaining at each stage and including the time it would take to serorevert after adequate treatment.

Seroprevalence data in women of reproductive age from this DisMod model were paired with age-specific live birth estimates from our demographic analyses to generate the number of pregnancies in women with syphilis. To adjust for fetal loss, the following steps were taken: 1) we ran ST-GPR on the ANC syphilis testing and treatment data from the Global Health Observatory (GHO) using SDI as a covariate; 2) pregnancies were categorized by the proportion of pregnant women with 0–1, 2+, and 4+ ANC visits; 3) we used notification data on the proportions with early and late syphilis and multiplied these with the data on ANC visits. Women with 0–1 ANC visits or any number of visits to clinics that did not test and treat were considered untreated. Those with late syphilis and 2–3 ANC visits to clinics that tested and treated were classified as inadequately treated, and those with early syphilis and 2+ ANC visits to clinics that tested and treated or late syphilis and 4+ visits were categorised as adequately treated.

From 11 follow-up studies of pregnant women with syphilis we derived excess fetal loss proportions and excess neonatal death proportions relative to non-syphilitic women by meta-analyses. Only one study (Ingraham 1950) provided additional information on fetal loss and neonatal mortality for women with early and late syphilis. Japanese notification data detailed by syphilis stage and patient age were used to determine the proportion with early/late syphilis by 5-year age groups. As the time periods these studies were conducted in varies greatly, we took into account the higher risk of an adverse pregnancy outcome in the past by subtracting rates of healthy mothers from syphilitic mothers from the same study. The ratio of mothers with early/late syphilis and the mortality rates by stage from this study were used to split the overall fetal loss and neonatal mortality rates for both untreated and inadequately treated syphilis into early and late syphilis rates for each category.

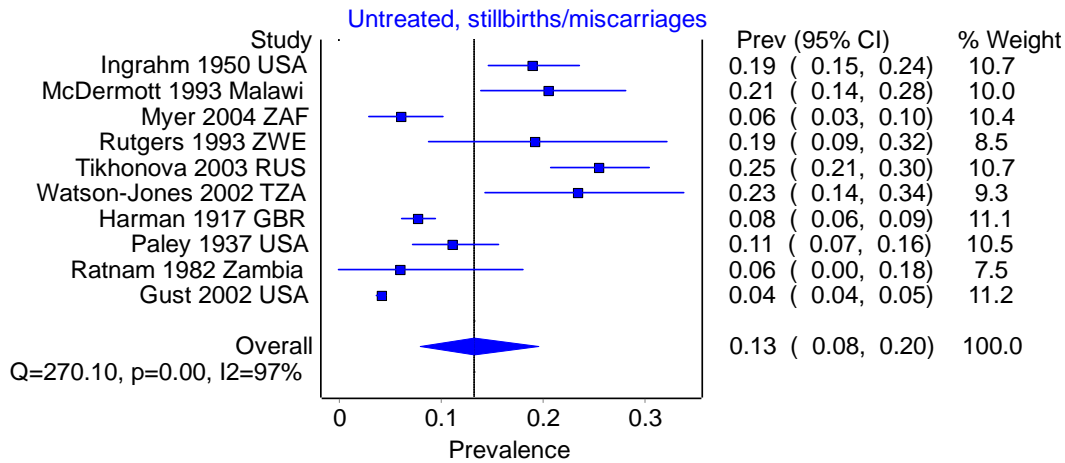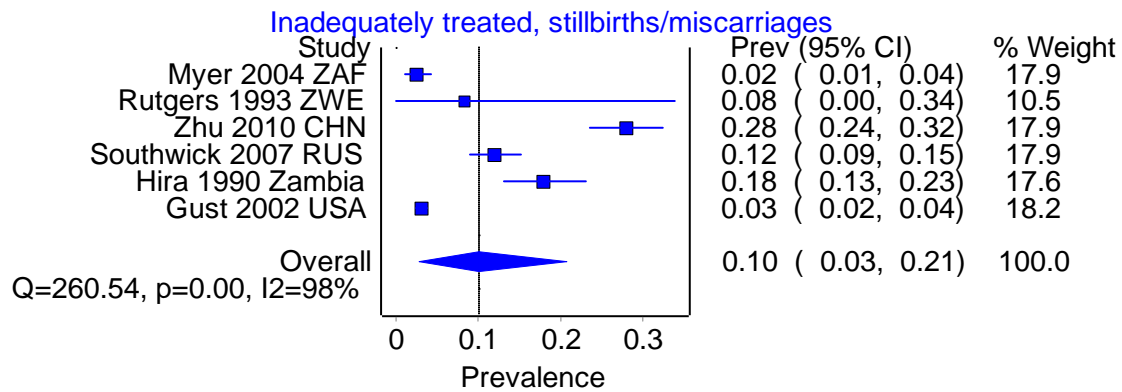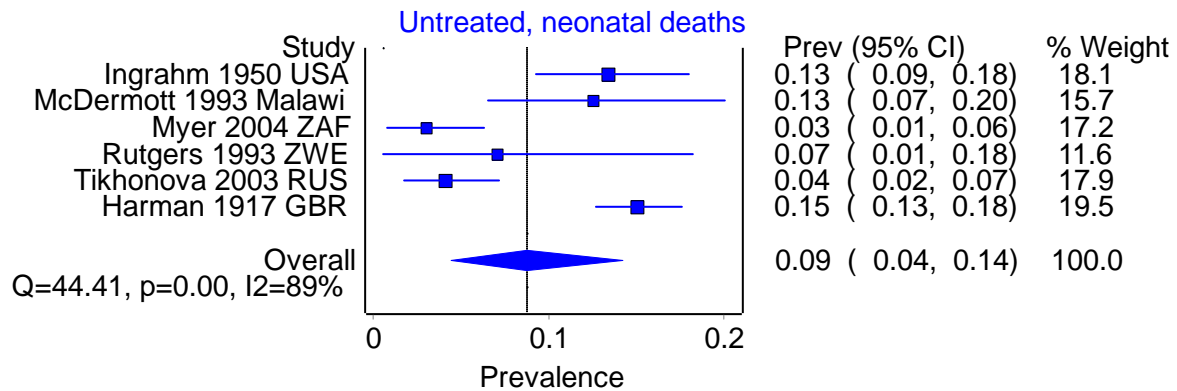

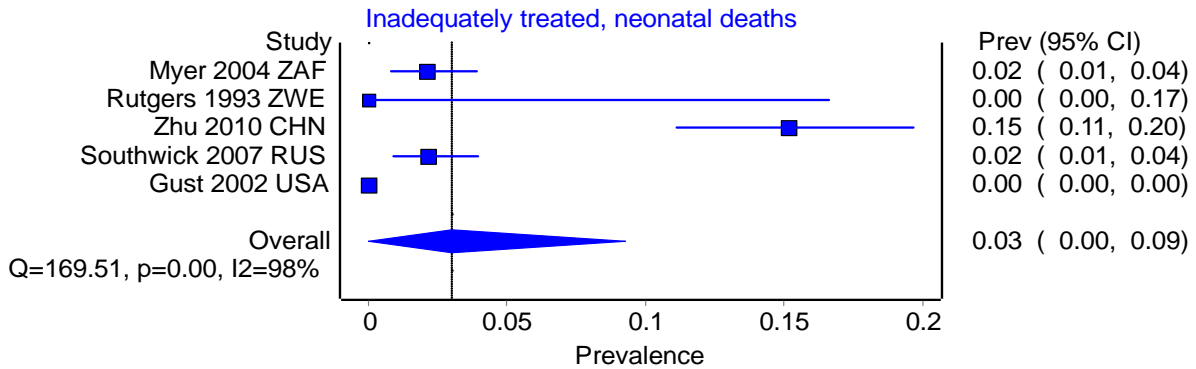

No excess mortality or fetal loss was assumed for adequately treated cases of maternal syphilis. A comparison of the neonatal mortality rates between adequately treated women and uninfected women showed a smaller proportion of babies from adequately treated women died than babies from uninfected women.

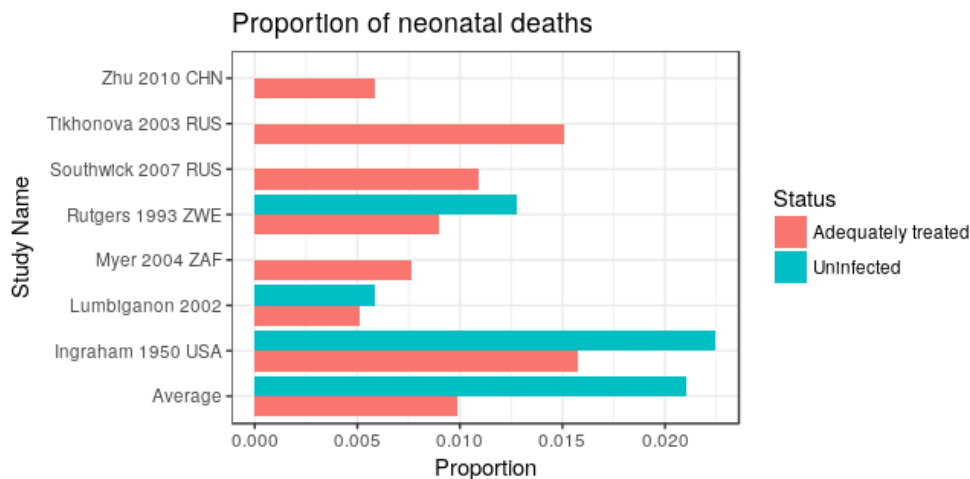

We first adjusted syphilitic pregnancies for the excess risk of stillbirth to estimate the number of stillbirths attributable to congenital syphilis. We then multiplied the live births in syphilitic mothers by the proportions of ANC visit categories, the probability of attending a clinic that tests and treats, and the proportions of early and late syphilis in pregnant women. We applied the appropriate neonatal excess mortality rates derived from our meta-analyses. This total number of neonatal syphilis deaths was split between the 0–6 days and 7–27 days age groups using sex- and age-specific VR data from the COD database. Congenital syphilis deaths beyond the neonatal period were likewise estimated using sex- and age-specific VR data. This VR pattern was applied globally to all locations.

The primary limitation of our estimation of STI deaths in those over 10 years old is data availability, especially from countries where VR systems are not available. Even in countries with VR, there may be some variation in practices for coding deaths to STI as the underlying cause, especially given the potentially variable presentation of many of the conditions in this category. Such variation is more likely to lead to underestimation of STI deaths than overestimation. The estimation of STI-specific deaths is



similarly limited by data availability in those locations without VR data, and our estimates are thus based on the overall pattern of deaths in generally higher-income geographies.

The primary implication of this limitation is that it decreases the resolution with which we can decompose the relationship between mortality from HIV and other STI. Our model for congenital syphilis continues to improve but still is limited by data availability issues and assumptions backed by sparse evidence, especially on the coverage and effectiveness of ANC interventions to prevent congenital syphilis. We do not have information on the proportion of women who tested positive who may have received treatment elsewhere, or information on the coverage of treatment for neonates, infants, and children born with congenital syphilis.

# Tuberculosis

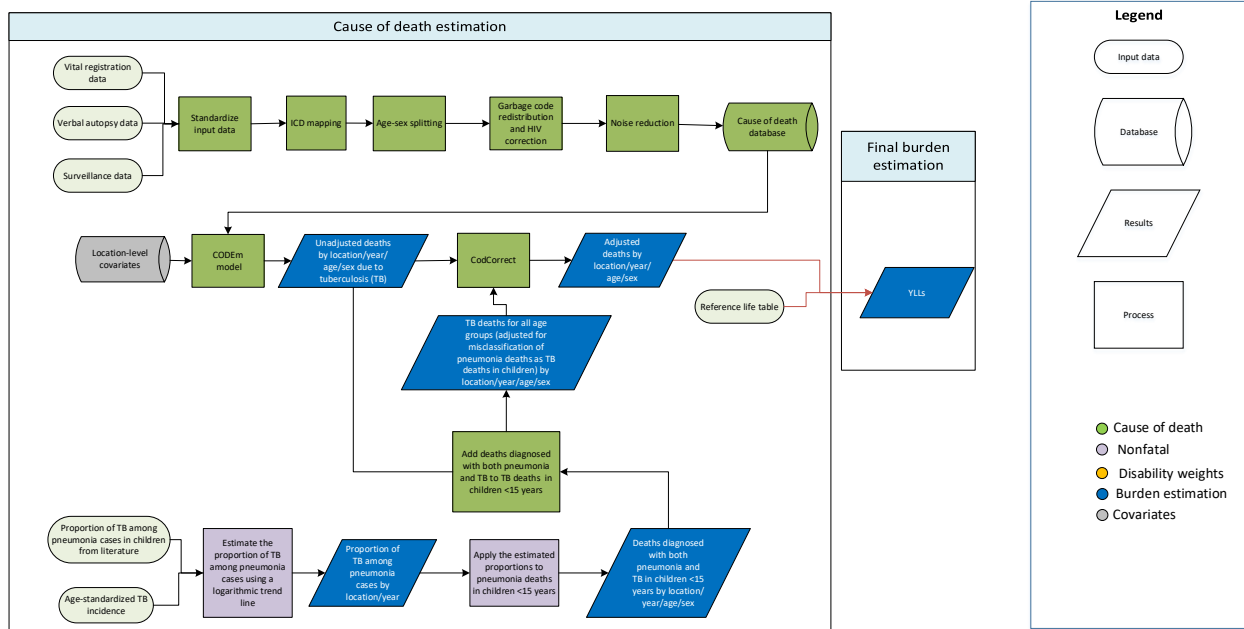

## Input data

Input data for modelling tuberculosis (TB) mortality among HIV-negative individuals include vital registration, verbal autopsy, and surveillance data. Vital registration data were adjusted for garbage coding (including ill-defined codes and the use of intermediate causes) following GBD algorithms and misclassified HIV deaths (ie, HIV deaths being assigned to other underlying causes of death such as tuberculosis or diarrhea because of stigma or misdiagnosis).

Verbal autopsy data in countries with age-standardised HIV prevalence greater than 5% were removed because of a high probability of misclassification, as verbal autopsy studies have poor validity in distinguishing HIV deaths from HIV-TB deaths.

## Modelling strategy

A general CODEm modelling strategy was used. We added a new covariate, namely the TB strain prevalence-weighted transmission risk. We also included the cigarettes per capita covariate. Other location-level covariates included in the CODEm model were the same as in GBD 2016: adult underweight proportion, alcohol (litres per capita), diabetes (fasting plasma glucose mmol/L), education (years per capita), Healthcare Access and Quality Index, lag-distributed income, indoor air pollution, outdoor air pollution, population density, prevalence of active tuberculosis, prevalence of latent tuberculosis infection, smoking prevalence, Socio-demographic Index, and a summary exposure variable reflecting the average exposure to all of the risk factors.

## Covariate table

|         | Covariate                                       | Direction |
|---------|-------------------------------------------------|-----------|
| Level 1 | TB prevalence                                   | +         |
|         | Latent TB infection prevalence                  | +         |
|         | SEV scalar                                      | +         |
|         | Alcohol per capita                              | +         |
|         | Smoking prevalence                              | +         |
|         | Cigarettes per capita                           | +         |
|         | Fasting plasma glucose                          | +         |
|         | TB strain prevalence-weighted transmission risk | +         |
| Level 2 | HAQ Index                                       | -         |
|         | Adult underweight proportion                    | +         |
|         | Indoor air pollution                            | +         |
|         | Outdoor air pollution                           | +         |
|         | Population density                              | +         |
| Level 3 | Log LDI                                         | -         |
|         | Education (years per capita)                    | -         |
|         | Socio-demographic Index (SDI)                   | -         |

Correcting for a potential misclassification of tuberculosis deaths as pneumonia deaths in children

In locations with high TB burden, TB deaths may be misclassified as pneumonia deaths in children,<sup>1</sup> and we addressed this potential misclassification in GBD 2017. First, we estimated the proportion of tuberculosis among pneumonia cases as a function of age-standardised TB incidence using data from eight clinical studies<sup>2,3,4,5,6,7,8,9</sup> reporting the proportion of pneumonia cases that had tuberculosis (or the data to calculate them) and the age-standardised TB incidence estimates. We used a logarithmic trend line to fit these data. Next, we applied the estimated proportions to pneumonia deaths (estimated for GBD 2017) among children younger than 15 years to compute the number of deaths diagnosed with both pneumonia and TB, which were then added to child TB deaths from the CODEm model. Finally, these estimates were adjusted using CoDCorrect, which ensures that the number of deaths from each cause add up to all-cause mortality deaths for a given year.

## References

1. Graham SM, Sismanidis C, Menzies HJ, Marais BJ, Detjen AK, Black RE. Importance of tuberculosis control to address child survival. *Lancet* 2014; **383**(9928): 1605-7.
2. Adegbola RA, Falade AG, Sam BE, et al. The etiology of pneumonia in malnourished and well-nourished Gambian children. *Pediatr Infect Dis J* 1994; **13**: 975–82.
3. Chisti MJ, Graham SM, Duke T, et al. A prospective study of the prevalence of tuberculosis and bacteraemia in Bangladeshi children with severe malnutrition and pneumonia including an evaluation of Xpert MTB/RIF assay. *PloS One* 2014; **9**: e93776.

4. Madhi SA, Petersen K, Madhi A, Khoosal M, Klugman KP. Increased disease burden and antibiotic resistance of bacteria causing severe community-acquired lower respiratory tract infections in human immunodeficiency virus type 1-infected children. *Clin Infect Dis* 2000; 31: 170–76.
5. McNally LM, Jeena PM, Gajee K, et al. Effect of age, polymicrobial disease, and maternal HIV status on treatment response and cause of severe pneumonia in South African children: a prospective descriptive study. *Lancet* 2007; 369: 1440–51.
6. Moore DP, Klugman KP, Madhi SA. Role of *Streptococcus pneumoniae* in hospitalisation for acute community-acquired pneumonia associated with culture-confirmed *Mycobacterium tuberculosis* in children: a pneumococcal conjugate vaccine probe study. *Pediatr Infect Dis J* 2010; 29: 1099–104.
7. Nantongo JM, Wobudeya E, Mupere E, et al. High incidence of pulmonary tuberculosis in children admitted with severe pneumonia in Uganda. *BMC Pediatr* 2013; 13: 16.
8. Zar HJ, Hanslo D, Tannenbaum E, et al. Aetiology and outcome of pneumonia in human immunodeficiency virus-infected children hospitalized in South Africa. *Acta Paediatr* 2001; 90: 119–25.
9. Moore DP, Higdon MM, Hammitt LL, Prosperi C, DeLuca AN, Da Silva P, Baillie VL, Adrian PV, Mudau A, Deloria Knoll M, Feikin DR. The incremental value of repeated induced sputum and gastric aspirate samples for the diagnosis of pulmonary tuberculosis in young children with acute community-acquired pneumonia. *Clinical Infectious Diseases*. 2017 May 27;64(suppl\_3):S309-16.

### TB strain prevalence-weighted transmission risk covariate

We added a new TB covariate added in this round of GBD that incorporated data on the global distribution of TB strains and the relative risk of transmission associated with those strains. For this covariate, we defined TB strains according to the seven phylogenetic lineages of the *Mycobacterium tuberculosis* complex (MTBC) identified by S. Gagneaux and colleagues.<sup>1</sup> We determined the global distribution of these strains using a systematic review of human TB molecular epidemiology studies from 1990 to 2017 in PubMed and Scopus, as described in greater detail elsewhere.<sup>2</sup> All studies that used population-based sampling methods or collected isolates from all culture-positive TB cases in a given location and time period were included. All genotypes that could be converted to phylogenetic lineages were extracted, including genotypes determined by spoligotyping, MIRU-VNTR typing, and PCR or whole-genome sequencing. Studies of sub-populations, such as prison populations or drug-resistant cases only, were excluded. In total, 206 studies representing 85 countries and over 200,000 bacterial isolates were included. A map of these strains highlighted the widespread global distribution of Euro-American Lineage 4 strains and East Asian Lineage 2 strains, and the geographic restriction of Lineage 5 and 6 strains to West Africa. Thirty of these studies also reported transmission chains associated with bacterial genotypes, as defined by genetic clustering.<sup>3</sup>

We used spatiotemporal Gaussian process regression (ST-GPR) to model the distribution of each strain in each GBD location across all ages and sexes, as described in greater detail elsewhere.<sup>4</sup> The covariates tested in each model included HIV age-standardised prevalence, population density, and a custom-made human movement covariate. The human movement covariate took into account (1) immigration and emigration patterns<sup>5</sup> and (2) airplane passenger flow<sup>6</sup> to and from each country. In the ST-GPR models we assumed strong correlation and smoothing over both space and time. We then used

a random-effects meta-analysis to determine the relative risk (RR) of transmission associated with each strain, as defined by genetic clustering. We used the most widespread strains, Euro-American Lineage 4 strains, as the reference group. We found that East Asian Lineage 2 strains were associated with increased risk of transmission overall (Relative Risk [95% CI] = 1.24 [1.07, 1.45]), while West African Lineage 5 and 6 strains were associated with reduced transmission (Relative Risk [95% CI] = 0.61 [0.43, 0.86]). We used the following formula to calculate a TB strain prevalence-weighted risk of transmission based on these estimates:

$$\sum_{i=1}^n Pr_i RR_i \quad i=\text{TB strain}; Pr=\text{proportion}; RR=\text{relative risk}$$

## References

1. Comas I, Coscolla M, Luo T, *et al.* Out-of-Africa migration and Neolithic coexpansion of *Mycobacterium tuberculosis* with modern humans. *Nat Genet* 2013; **45**: 1176–82.
2. Wiens KE, Woyczynski LP, Ledesma JR, *et al.* Global variation in bacterial strains that cause tuberculosis disease: a systematic review and meta-analysis. *BMC Medicine*; In Review.
3. Dheda K, Gumbo T, Maartens G, *et al.* The epidemiology, pathogenesis, transmission, diagnosis, and management of multidrug-resistant, extensively drug-resistant, and incurable tuberculosis. *Lancet Respir Med* 2017; **5**: 291–360.
4. Manuscript in preparation.
5. United Nations Population Division. United Nations Trends in International Migrant Stock: The 2015 Revision. New York City, United States: United Nations Population Division, 2015.
6. Huang Z, Wu X, Garcia AJ, *et al.* An open-access modeled passenger flow matrix for the global air network in 2010. *PLoS ONE* **8(5)**: e64317.

# Multidrug-resistant tuberculosis, extensively drug-resistant tuberculosis, and drug-susceptible tuberculosis

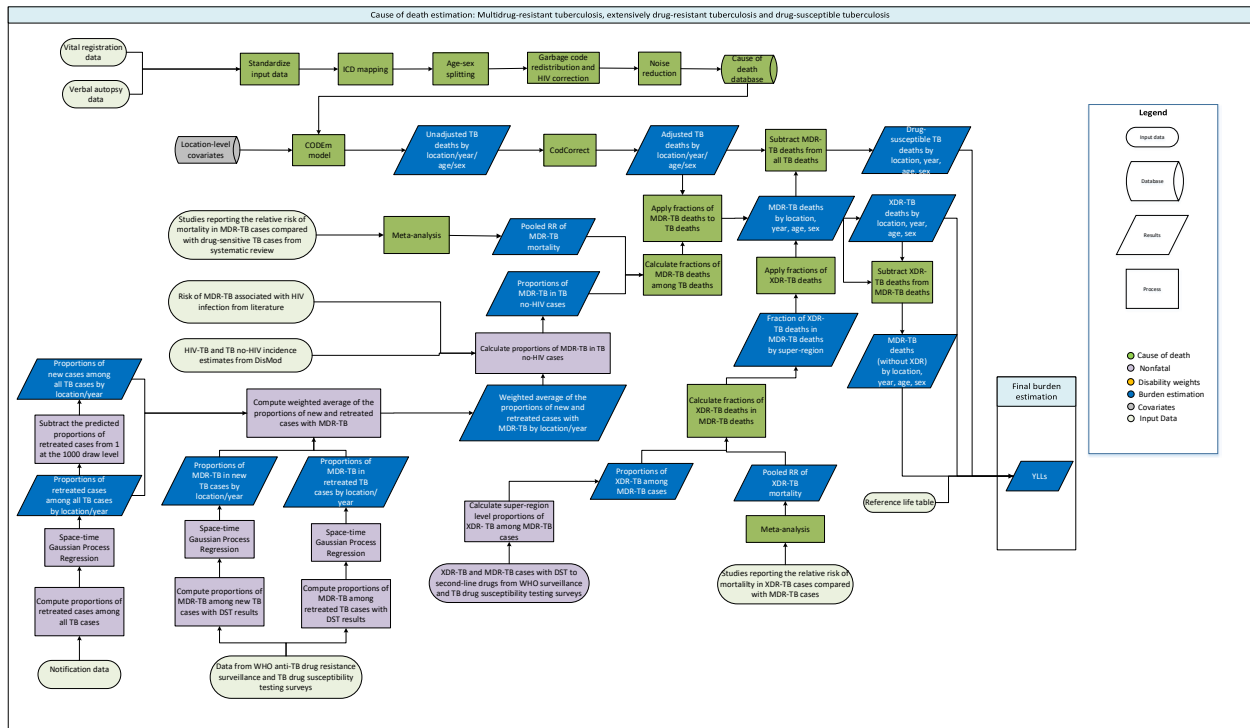

## Input data

Input data include: (i) the number of drug-resistant cases by type (multidrug-resistant tuberculosis [MDR-TB], extensively drug-resistant tuberculosis [XDR-TB], all TB cases with a drug-susceptible testing [DST] result for isoniazid and rifampicin, and MDR-TB cases with DST for second-line drugs) from routine surveillance and surveys reported to the World Health Organization, (ii) data from studies (identified through our systematic review) reporting on the relative risk of death in MDR-TB cases compared with non-MDR TB (drug-susceptible TB) cases, and the relative risk of death in XDR-TB cases compared with MDR-TB cases, and (iii) the risk of MDR-TB associated with HIV infection from the literature.<sup>1</sup>

## Modelling strategy

We conducted a systematic review and meta-analysis of studies reporting the relative risk of death in MDR-TB cases compared with drug-susceptible TB cases. We ran spatiotemporal Gaussian process regressions to predict the proportions of new TB cases with MDR-TB, proportions of retreated TB cases with MDR-TB, and proportions of retreated cases among all TB cases for all locations and years. We also calculated the proportions of new TB cases among all TB cases. We then computed the weighted average of the proportions of new and retreated cases with MDR-TB at the 1,000-draw level. We then used the weighted average proportions of MDR-TB, along with the HIV-TB and TB no-HIV incidence estimates (from our modeling of non-fatal TB), and the relative risk of MDR-TB associated with HIV

infection from the literature<sup>1</sup> to compute the proportions of MDR-TB cases among HIV-negative TB cases ( $P_{MDRnoHIVc,y,a,s}$ ) by location, year, age, and sex using the following formula:

$$P_{MDRnoHIVc,y,a,s} = \frac{MDR_{c,y}}{\left(1 + \left(RR_{HIV} \frac{HIVTB_{c,y,a,s}}{TBnoHIV_{c,y,a,s}}\right)\right) TBnoHIV_{c,y,a,s}}$$

where  $MDR_{c,y}$  is the number of all MDR-TB cases among HIV-positive and HIV-negative individuals by location and year,  $RR_{HIV}$  is the relative risk of MDR-TB associated with HIV infection,  $HIVTB_{c,y,a,s}$  is the number of HIV-TB incident cases by location, year, age, and sex, and  $TBnoHIV_{c,y,a,s}$  is the number of TB no-HIV incident cases by location, year, age, and sex.

We then computed the fraction of MDR-TB deaths among all HIV-negative TB deaths ( $D_{MDRnoHIVc,y,a,s}$ ) using the following formula:

$$D_{MDRnoHIVc,y,a,s} = \frac{P_{MDRnoHIVc,y,a,s} RR_{MDR}}{P_{MDRnoHIVc,y,a,s} RR_{MDR} + 1 - P_{MDRnoHIVc,y,a,s}}$$

where  $RR_{MDR}$  is the relative risk of death in MDR-TB cases compared with drug-susceptible TB cases. We then applied the predicted fractions of MDR-TB deaths among HIV-negative TB deaths to our CODEm TB death estimates to generate MDR-TB deaths by location, year, age, and sex. Next, we subtracted MDR-TB deaths from all TB deaths to generate drug-susceptible TB deaths by location, year, age, and sex.

To separate out XDR-TB from MDR-TB, we aggregated the XDR-TB cases and MDR-TB cases (with DST for second-line drugs) up to the super-region level and calculated the super-region-level proportions of XDR-TB among MDR-TB cases. Next, we computed the super-region-specific fractions of XDR-TB deaths among all MDR-TB deaths ( $D_{XDRsr}$ ) using the following formula:

$$D_{XDRsr} = \frac{P_{XDRsr} RR_{XDR}}{P_{XDRsr} RR_{XDR} + 1 - P_{XDRsr}}$$

where  $P_{XDRsr}$  is the proportion of XDR-TB among MDR-TB cases for each super-region, and  $RR_{XDR}$  is the pooled relative risk of mortality in XDR-TB cases compared with MDR-TB cases. These fractions were then applied to MDR-TB deaths in corresponding countries within the super-regions to produce XDR-TB deaths by location, age, and sex for the most recent year of estimation. We linearly extrapolated XDR-TB mortality rates back, assuming the mortality rates were zero in 1992, one year before 1993 when XDR-TB was first recorded in USA surveillance data.<sup>2</sup> Finally, we subtracted XDR-TB deaths from MDR-TB deaths to generate MDR-TB (without extensive drug resistance) deaths by location, year, age, and sex.

## References

1. Mesfin YM, Hailemariam D, Biadglign S, Kibret KT. Association between HIV/AIDS and multi-drug resistance tuberculosis: a systematic review and meta-analysis. PLoS One. 2014;9(1):e82235.

2. Centers for Disease Control and Prevention (CDC). Extensively Drug-Resistant Tuberculosis --- United States, 1993—2006. MMWR. 2007; 56(11);250-253



## Lower Respiratory Infections

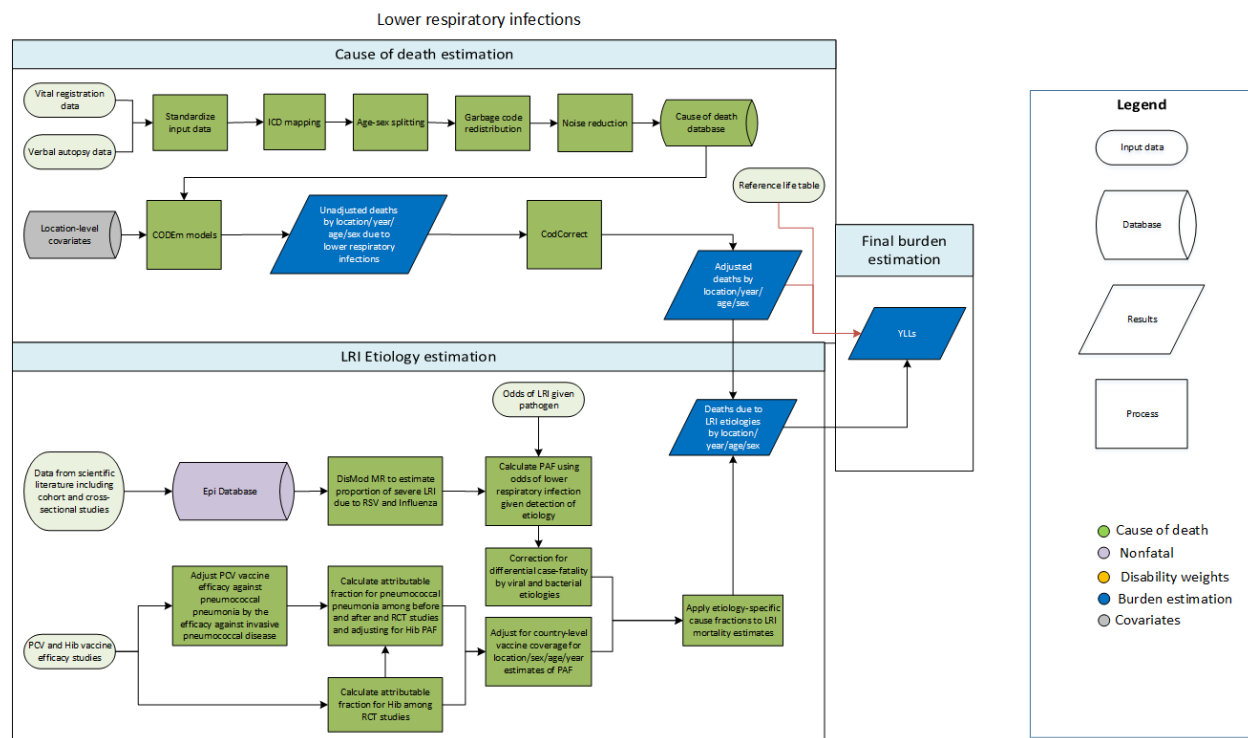

### Input data

#### Cause of death

Lower respiratory infection (LRI) mortality was estimated in CODEm. We estimated LRI mortality separately for males and females and for children under 5 years and older than 5 years. We used all available data from vital registration systems, surveillance systems, and verbal autopsy (**Table 1**). We checked for and excluded outliers from our data by country or region. We also excluded ICD9-coded mortality data in Sri Lanka (1982, 1987–1992), ICD9-coded neonatal mortality data in Guatemala (1980, 1981, 1984, 2000–2004), and medically coded cause of death data (MCCD) and Civil Registration System data in many Indian states (1986–2013).

**Table 1. Summary of cause-specific mortality modelling input data.**

| Input data                | GBD 2017                      |
|---------------------------|-------------------------------|
| <b>Total data sources</b> | <b>19,827 geography-years</b> |
| Vital registration data   | 17,374 geography-years        |
| Sample registration data  | 740 geography-years           |
| Verbal autopsy data       | 1,153 geography-years         |
| Surveillance              | 560 geography-years           |

**Figure 1. The number of geography-years of LRI mortality data by GBD geography is shown**

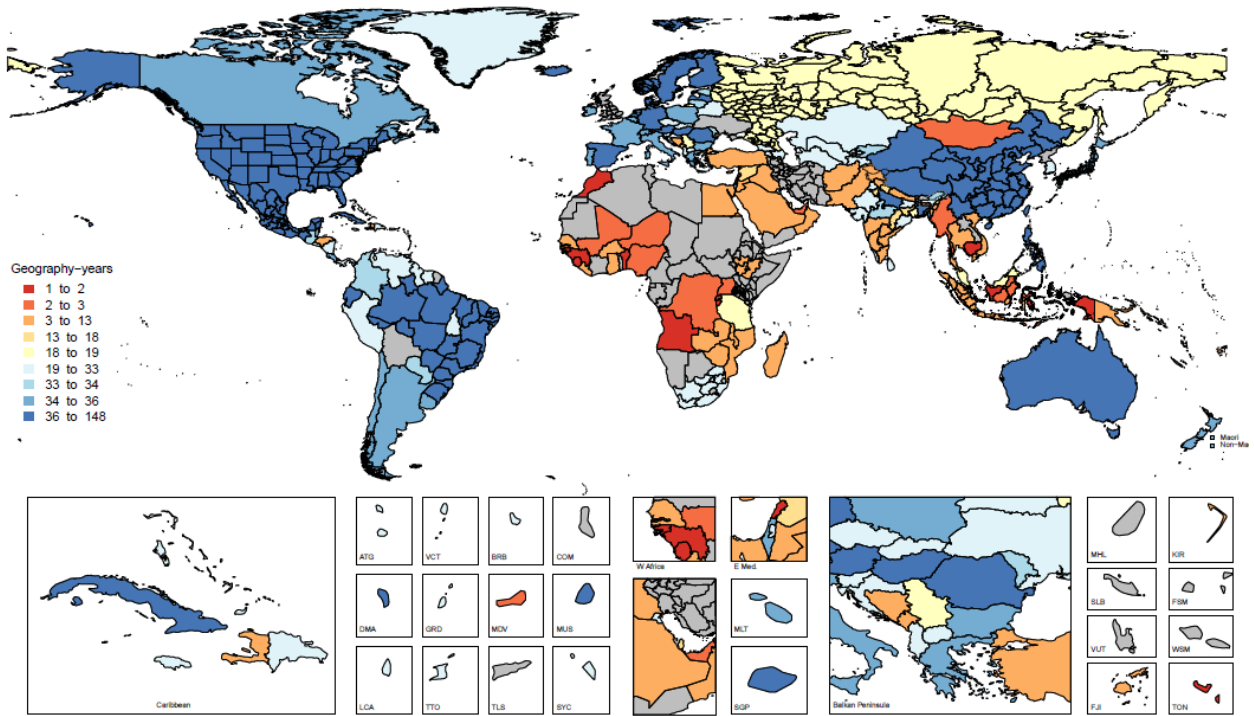

## Aetiologies

We updated our systematic review of scientific literature for the proportion of LRI that tested positive for influenza and respiratory syncytial virus (RSV) to include all data from GBD 2016 and from studies published between January 1, 2016 and May 26, 2017. We performed the search using PubMed and the following search string:

“lower respiratory”[title/abstract] OR pneumonia[title/abstract]) AND (2016/01/01[PDat] : 2017/12/31[PDat]) AND (incidence OR prevalence OR epidemiology OR etiolog\*[title/abstract] OR influenza[title/abstract] OR “respiratory syncytial virus”[title/abstract]) AND Humans[MeSH Terms] NOT(autoimmune[title/abstract] OR COPD [title/abstract] OR “cystic fibrosis”[title/abstract] OR Review[ptyp])

Inclusion criteria were studies that had a sample size of at least 100, studies that were at least one year in duration, and studies describing lower respiratory infections, pneumonia, or bronchiolitis as the case definition. During our literature review we identified 595 studies, of which 75 met our inclusion criteria and were extracted. We excluded studies that described pandemic H1N1 influenza solely and studies that used influenza-like illness as the case definition. We assigned an age range based on the prevalence-weighted mean age of LRI in the appropriate year/sex/location if the ages of the study participants were not reported.

We also conducted a systematic literature review of studies on the Hib vaccine and PCV effectiveness studies against X-ray-confirmed pneumonia and against pneumococcal and Hib disease until May 2017. For PCV studies, we extracted, if available, the distribution of pneumococcal pneumonia serotypes and the serotypes included in the PCV used in the study. No new studies were identified for GBD 2017. We excluded observational and case-control studies due to implausibly high vaccine efficacy estimates. Hib trial data were exclusively from children <5 years, so we did not include the effect of Hib on ages over 5 years of age. PCV trial data are also frequently limited to younger populations. To understand the contribution of pneumococcal pneumonia in older populations, we also included PCV efficacy studies that used before-after approaches.

## Modelling strategy

**Cause of death.** We used country-level covariates to inform our CODEm models (**Table 2**). We evaluated our LRI cause of death models using in and out of sample predictive performance.

Like all models of mortality in GBD, LRI mortality models are single-cause, requiring in effect that the sum of all mortality models must be equal to the all-cause mortality envelope. We correct LRI mortality estimates, and other causes of mortality, by rescaling them according to the uncertainty around the cause-specific mortality rate. This process is called CoDCorrect and is essential to ensure internal consistency among causes of death.

**Table 2. Covariates used in LRI mortality modelling. Table 2A is for children under 5 and Table 2B shows the covariates used for ages 5-95+.** The *Level* is the associated strength of relationship between the covariate and LRI mortality, ranked from 1 (proximally related) to 3 (distally related). The direction is the forced direction of the association between the covariate and LRI mortality.

**Table 2A. Covariates used in under 5 years model**

| Level | Covariate                                  | Direction |
|-------|--------------------------------------------|-----------|
| 1     | Childhood stunting SEV                     | +         |
|       | Childhood underweight SEV                  | +         |
|       | Childhood wasted SEV                       | +         |
|       | Indoor air pollution                       | +         |
|       | Short gestation SEV                        | +         |
|       | Low weight gestation                       | +         |
|       | LRI summary exposure variable              | +         |
|       | Second-hand smoking prevalence             | +         |
|       | Antibiotics for LRI                        | -         |
|       | Hib vaccine coverage                       | -         |
|       | Pneumococcal conjugate vaccine coverage    | -         |
| 2     | Discontinued breastfeeding SEV             | +         |
|       | Vitamin A deficiency                       | +         |
|       | Zinc deficiency                            | +         |
|       | DTP3 vaccine coverage                      | -         |
|       | Healthcare access and quality index        | -         |
| 3     | Outdoor air pollution (PM <sub>2.5</sub> ) | +         |
|       | Population density > 1000/km <sup>2</sup>  | +         |
|       | Sanitation SEV                             | +         |
|       | Handwashing                                | -         |
|       | LDI per capita                             | -         |
|       | Maternal education                         | -         |
|       | Socio-demographic Index                    | -         |

**Table 2B. Covariates used in 5-95+ years model**

| Level | Covariate                               | Direction |
|-------|-----------------------------------------|-----------|
| 1     | Indoor air pollution                    | +         |
|       | LRI summary exposure variable           | +         |
|       | Outdoor air pollution                   | +         |
|       | Secondhand smoking prevalence           | +         |
|       | Smoking prevalence                      | +         |
| 2     | DTP3 vaccine coverage                   | -         |
|       | Healthcare access and quality index     | -         |
|       | Mean BMI                                | -         |
|       | Pneumococcal conjugate vaccine coverage | -         |
|       | Handwashing                             | +         |
| 3     | Education years per capita              | -         |
|       | LDI per capita                          | -         |
|       | Socio-demographic Index                 | -         |
|       | Alcohol consumption                     | +         |
|       | Sanitation summary exposure variable    | +         |

## Aetiologies

We estimated LRI aetiologies separately from overall LRI mortality using two distinct counterfactual modelling strategies to estimate population attributable fractions (PAFs), described in detail below. The PAF represents the relative reduction in LRI mortality if there was no exposure to a given aetiology. As LRIs can be caused by multiple pathogens and the pathogens may co-infect, PAFs can overlap and add up to more than 100%. Separate strategies were used for viral – influenza and respiratory syncytial virus (RSV) – and bacterial – *Streptococcus pneumoniae* and *Haemophilus influenzae* type B – aetiologies. We did not attribute aetiologies to neonatal pneumonia deaths due to a dearth of reliable data in this age group. We calculated uncertainty of our PAF estimates from 1,000 draws of each parameter using normal distributions in log space.

**Influenza and RSV.** We calculated the population attributable fraction (PAF) from the proportion of severe LRI cases positive for influenza and RSV. We assumed that hospitalised LRI cases are a proxy of severe cases. We used the following formula to estimate PAF:<sup>1</sup>

$$\text{PAF} = \text{Proportion} * (1 - 1/\text{OR})$$

Where *Proportion* is the proportion of LRI cases that test positive for influenza or RSV and *OR* is the odds ratio of LRI given the presence of the pathogen. We used an odds ratio of 5.1 (3.19–8.14) for influenza and 9.79 (4.98–19.27) for RSV from a recently published meta-analysis.<sup>2</sup>

We modelled the proportion data using the meta-regression tool DisMod-MR to estimate the proportion of LRI cases that are positive for influenza and RSV, separately, by location/year/age/sex. We accounted for study-level covariates in our models such as PCR as the diagnostic technique, studies that investigated RSV or influenza exclusively, and studies from inpatient populations.

As the case-fatality of viral causes of pneumonia is lower than for bacterial causes, we adjusted for differential case-fatality by determining the aetiological fractions for mortality attributable to RSV and influenza (**Table 3**). We measured the aetiologic fractions by applying a relative case-fatality adjustment based on in-hospital case-fatality, which we coded to specific pneumonia aetiologies. Hospital admissions data of this type were limited to data from Austria, Brazil, Chile, China, Ecuador, Italy, Kenya, Mexico, New Zealand, the Philippines, Portugal, and the United States. We generated the pooled estimate of the case-fatality differential between bacterial (pneumococcus, Hib) and viral aetiologies (RSV, influenza) using DisMod-MR to determine an age pattern for this ratio.

**Pneumococcal pneumonia and Hib.** For *Streptococcus pneumoniae* (pneumococcal pneumonia) and *Haemophilus influenzae* type B (Hib), we calculated the population attributable fraction using a vaccine probe design.<sup>3,4</sup> The ratio of vaccine effectiveness against nonspecific pneumonia to pathogen-specific disease represents the fraction of pneumonia cases attributable to each pathogen.

To estimate the PAF for Hib and pneumococcal pneumonia, we calculated the ratio of vaccine effectiveness against nonspecific pneumonia to pathogen-specific pneumonia (Equations 1 and 3). We estimated a study-level estimate of PAF from a meta-analysis of these ratios. To estimate the PAF for Hib, we only used randomised controlled trials because of implausibly high values of vaccine efficacy in case-control studies. To estimate the PAF for pneumococcal pneumonia, we included RCTs and before and after vaccine introduction longitudinal studies.

We adjusted the study-level PAF estimate by vaccine coverage and expected vaccine performance to estimate country- and year-specific PAF values. For pneumococcal pneumonia, we adjusted the PAF by the final Hib PAF estimate and by vaccine serotype coverage. Finally, we used an age distribution of PAF modelled in DisMod to determine the PAF by age. Because of an absence of data describing vaccine efficacy against Hib in children older than 2 years, we did not attribute Hib to episodes of LRI in ages 5 years and older.

We used a vaccine probe design to estimate the PAF for pneumococcal pneumonia and (Hib) by first calculating the ratio of vaccine effectiveness against nonspecific pneumonia to pathogen-specific pneumonia at the study level (Equations 1 and 2).<sup>3-5</sup> We then adjusted this estimate by vaccine coverage and expected vaccine performance to estimate country- and year-specific PAF values (Equations 3 and 4).

$$1) \text{ HibPAF}_{Base} = 1 - \frac{VE_{Pneumonia}}{VE_{Hib}}$$

$$2) \text{ PneumoPAF}_{Base} = 1 - \frac{VE_{Pneumonia} * (1 - PAF_{Hib} * VE_{Hib Optimal})}{VE_{Streptococcus} * COV_{Serotype}}$$

$$3) PAF_{Hib} = PAF_{Base} * \frac{(1 - COV_{Hib} * VE_{Hib Optimal})}{(1 - PAF_{Base} * COV_{Hib} * VE_{Hib Optimal})}$$

$$4) PAF_{Pneumo} = \frac{PAF_{Base} * (1 - COV_{PCV} * VE_{PCV Optimal})}{(1 - PAF_{Hib} * COV_{Hib} * VE_{Hib Optimal}) * \left(1 - \frac{PAF_{Base} * COV_{PCV} * VE_{PCV Optimal}}{(1 - PAF_{Hib} * COV_{Hib} * VE_{Hib Optimal})}\right)}$$

Where  $VE_{Pneumonia}$  is the vaccine efficacy against nonspecific pneumonia,  $VE_{Hib}$  is the vaccine efficacy against invasive Hib disease,  $VE_{Streptococcus}$  is the vaccine efficacy against serotype-specific pneumococcal pneumonia,  $COV_{serotype}$  is the serotype-specific vaccine coverage for PCV,<sup>6</sup>  $VE_{Hib Optimal}$  is the Hib effectiveness in the community (0.8),<sup>7</sup>  $PAF_{Hib}$  is the final PAF for Hib,  $COV_{PCV}$  is the PCV coverage,  $COV_{Hib}$  is the Hib coverage by country, and  $VE_{PCV Optimal}$  is the vaccine effectiveness in the community (0.8).<sup>8</sup>

For Hib, we assumed that the vaccine efficacy against invasive Hib disease is the same against Hib pneumonia. For pneumococcal pneumonia, a recent study in adults<sup>9</sup> found that the vaccine efficacy against invasive pneumococcal disease may be significantly higher than against pneumococcal pneumonia. We used this ratio to adjust estimates of vaccine efficacy against invasive pneumococcal disease from other studies. However, recognising that the study is unique in that it uses a urine antigen test among adults, we added uncertainty around our adjustment using a wide uniform distribution (median 0.65, 0.3–1.0). This has increased the estimates of pneumococcal pneumonia mortality in a meaningful way.

The only substantive changes to the cause of death estimation for LRI in GBD 2017 were the addition of new cause of death data and inclusion of several additional covariates. The ratio of mortality in bacterial

to viral aetiologies was updated for GBD 2017 and the new results substantively increase the attribution of influenza and RSV to LRI deaths.

**Table 3: The median values for the ratio of viral to bacterial pneumonia case fatality ratio by age is shown.** These estimates are modelled using hospital-based, ICD-coded admissions and mortality for aetiology-specified pneumonia. Values in parentheses represent 95% uncertainty interval.

| Age Group      | Ratio            |
|----------------|------------------|
| Early Neonatal | 0.59 (0.36–0.84) |
| Late Neonatal  | 0.58 (0.37–0.84) |
| Post Neonatal  | 0.58 (0.41–0.77) |
| 1 to 4         | 0.69 (0.64–0.74) |
| 5 to 9         | 0.85 (0.77–0.93) |
| 10 to 14       | 0.84 (0.79–0.89) |
| 15 to 19       | 0.83 (0.78–0.87) |
| 20 to 24       | 0.82 (0.77–0.87) |
| 25 to 29       | 0.82 (0.78–0.86) |
| 30 to 34       | 0.82 (0.79–0.85) |
| 35 to 39       | 0.82 (0.8–0.85)  |
| 40 to 44       | 0.82 (0.8–0.85)  |
| 45 to 49       | 0.82 (0.8–0.85)  |
| 50 to 54       | 0.82 (0.79–0.85) |
| 55 to 59       | 0.82 (0.79–0.86) |
| 60 to 64       | 0.82 (0.79–0.86) |
| 65 to 69       | 0.82 (0.8–0.85)  |
| 70 to 74       | 0.82 (0.79–0.85) |
| 75 to 79       | 0.82 (0.78–0.85) |
| 80 to 84       | 0.83 (0.8–0.87)  |
| 85 to 89       | 0.86 (0.83–0.89) |
| 90 to 94       | 0.89 (0.85–0.93) |
| 95 to 99       | 0.92 (0.86–0.97) |

## References

- 1 Miettinen OS. Proportion of disease caused or prevented by a given exposure, trait or intervention. *Am J Epidemiol* 1974; **99**: 325–32.
- 2 Shi T, McLean K, Campbell H, Nair H. Aetiological role of common respiratory viruses in acute lower respiratory infections in children under five years: A systematic review and meta-analysis. *J Glob Health* 2015; **5**: 10408.
- 3 Feikin DR, Scott JAG, Gessner BD. Use of vaccines as probes to define disease burden. *Lancet Lond Engl* 2014; **383**: 1762–70.
- 4 O'Brien KL, Wolfson LJ, Watt JP, *et al.* Burden of disease caused by *Streptococcus pneumoniae* in children younger than 5 years: global estimates. *Lancet Lond Engl* 2009; **374**: 893–902.
- 5 Watt JP, Wolfson LJ, O'Brien KL, *et al.* Burden of disease caused by *Haemophilus influenzae* type b in children younger than 5 years: global estimates. *Lancet Lond Engl* 2009; **374**: 903–11.
- 6 Johnson HL, Deloria-Knoll M, Levine OS, *et al.* Systematic evaluation of serotypes causing invasive pneumococcal disease among children under five: the pneumococcal global serotype project. *PLoS Med* 2010; **7**. DOI:10.1371/journal.pmed.1000348.
- 7 Swingler G, Fransman D, Hussey G. Conjugate vaccines for preventing *Haemophilus influenzae* type B infections. *Cochrane Database Syst Rev* 2007; : CD001729.
- 8 Lucero MG, Dulalia VE, Nillos LT, *et al.* Pneumococcal conjugate vaccines for preventing vaccine-type invasive pneumococcal disease and X-ray defined pneumonia in children less than two years of age. *Cochrane Database Syst Rev* 2009; : CD004977.
- 9 Bonten MJM, Huijts SM, Bolkenbaas M, *et al.* Polysaccharide conjugate vaccine against pneumococcal pneumonia in adults. *N Engl J Med* 2015; **372**: 1114–25.



# Upper Respiratory Infections

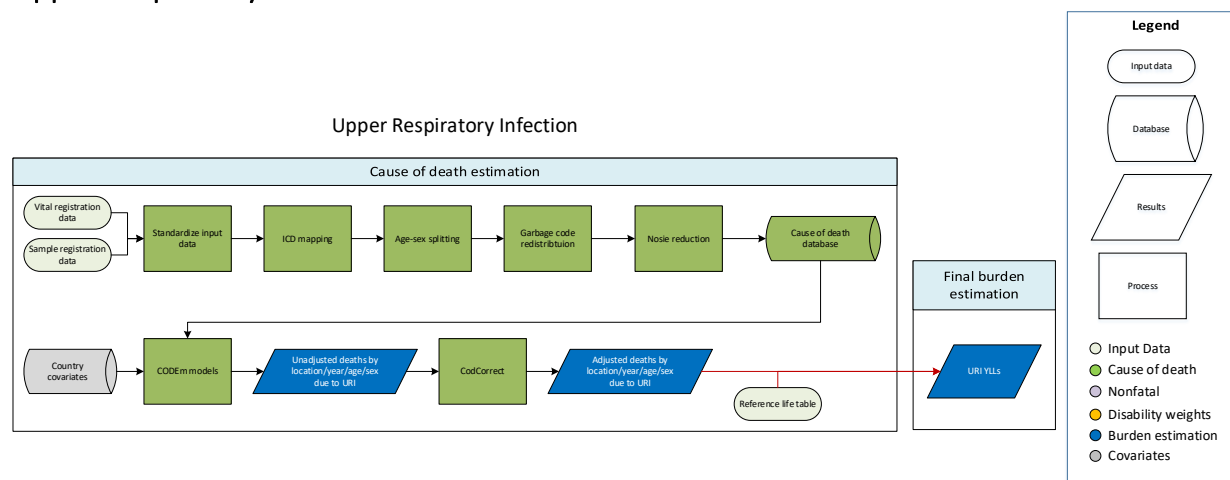

## Input Data and Methodological Summary for Upper Respiratory Infections

### Input data

Vital registration and surveillance data from the cause of death database were used. Outliers were identified by systematic examination of data points. Data points that violated well-established age or time trends, were inconsistent with other country- or region-specific points, or that resulted in extremely high or low mortality rates were determined to be outliers.

### Modelling strategy

A generic CODEm approach was used to estimate mortality due to upper respiratory infections (URI) in GBD 2017. In GBD 2016, mortality from URI was modelled using a negative binomial regression. It was determined that a negative binomial regression was an appropriate approach for estimating URI due to a small number of deaths due to URI in the cause of death database. However, due to changes in how we redistribute cause of death codes, more deaths were attributed to URI in the COD database and thus it was determined that a generic CODEm approach is feasible for estimating URI mortality in GBD 2017. The covariates used are displayed below.

| Level | Covariate                              | Direction |
|-------|----------------------------------------|-----------|
| 1     | Smoking prevalence                     | +         |
| 2     | Indoor pollution                       | +         |
|       | Outdoor pollution (PM <sub>2.5</sub> ) | +         |
|       | Healthcare Access and Quality Index    | +         |
| 3     | SDI                                    | -         |
|       | LDI                                    | -         |
|       | Education (years per capita)           | -         |

## Otitis Media

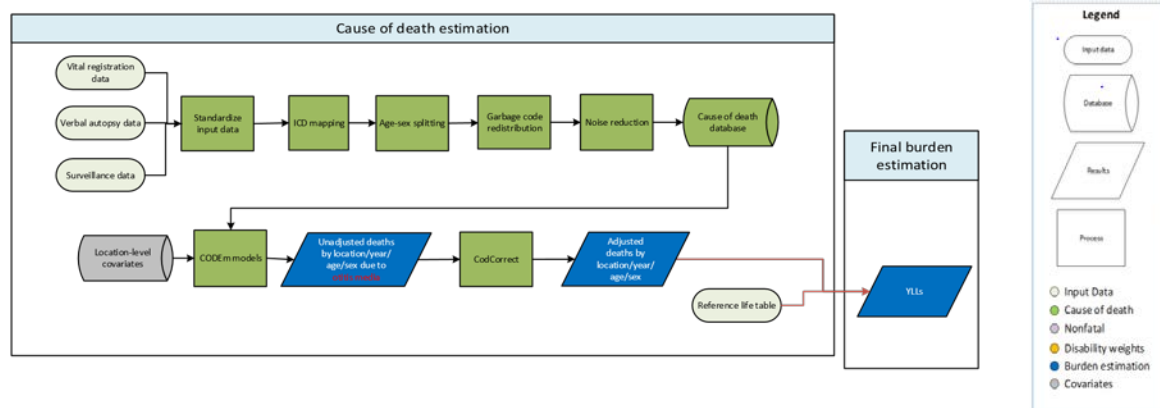

## Input Data and Methodological Summary for Otitis Media

### Input data

Vital registration, verbal autopsy, and surveillance data were used. Outliers were identified by systematic examination of data points. Data points that violated well-established age or time trends, were inconsistent with other country- or region-specific points, or that resulted in extremely high or low mortality rates were determined to be outliers.

### Modeling strategy

A general CODEm modelling strategy was used. There were no substantive changes from GBD 2016 in terms of modelling strategy. The covariates used are displayed below.

| Level | Covariate                              | Direction |
|-------|----------------------------------------|-----------|
| 1     | Otitis SEV                             | +         |
|       | Smoking prevalence                     | +         |
| 2     | Indoor pollution                       | +         |
|       | Healthcare Access and Quality Index    | -         |
|       | Outdoor pollution (PM <sub>2.5</sub> ) | +         |
| 3     | SDI                                    | -         |
|       | LDI                                    | -         |
|       | Education (years per capita)           | -         |

## Diarrhoeal Diseases

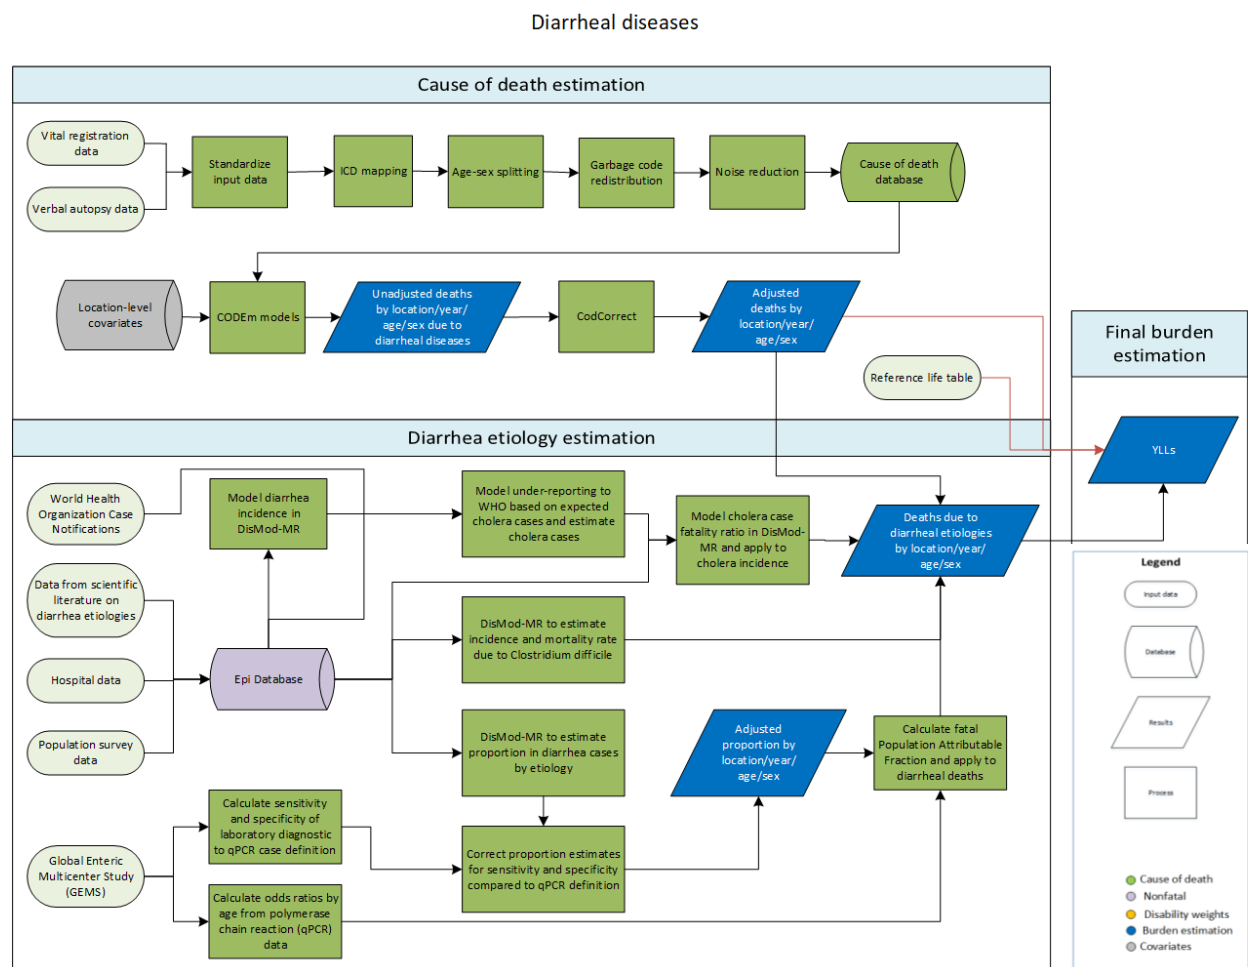

### Input data

**Cause of death.** We used all available data from vital registration systems, surveillance systems and verbal autopsy (Table 1 and Figure 1). We checked for and excluded outliers from our data by country or region. We also excluded early neonatal mortality data in the Philippines (1994–1998) and India Civil Registration System data and medically certified cause of death (MCCD) data in all states (1986–2013).

**Aetiologies.** We conducted a systematic literature review for the proportion of diarrhoea cases that tested positive for each aetiology. We updated our review of literature to include studies published between January 2016 and May 2017. The search was performed in PubMed using the following search string:

(diarrhoea[title/abstract] OR diarrhea[title/abstract]) AND ( 2016/01/01:2017/12/31[PDat]) AND Humans[MeSH Terms] AND (incidence[title/abstract] OR prevalence[title/abstract] OR epidemiology[title/abstract] OR salmonella[title/abstract] OR aeromonad\*[title/abstract] OR

shigell\*[title/abstract] OR enteropathogenic[title/abstract] OR enterotoxigenic[title/abstract] OR campylobacter[title/abstract] OR amoebiasis[title/abstract] OR entamoeb\*[title/abstract] OR cryptosporid\*[title/abstract] OR rotavirus[title/abstract] OR norovirus[title/abstract] OR adenovirus[title/abstract] OR etiology[title/abstract]) NOT (appendicitis[title/abstract] OR esophag\*[title/abstract] OR surger\*[title/abstract] OR gastritis[title/abstract] OR liver[title/abstract] OR case report[title] OR case-report[title] OR therapy[title] OR treatment[title] Crohn[title/abstract] OR “inflammatory bowel”[title/abstract] OR irritable[title/abstract] OR travel\*[title] OR Outbreak[title] OR Review[ptyp] OR vomiting[title/abstract])

Inclusion criteria included diarrhoea as the case definition, studies with a sample size of at least 100, and studies with at least one year of follow-up. We excluded studies that reported on diarrhoeal outbreaks exclusively and those that used acute gastroenteritis with or without diarrhoea. We identified 225 studies, of which 51 met our criteria of inclusion and were included. We extracted data points for location, sex, year, and age. We assigned an age range based on the prevalence-weighted mean age of diarrhoea in the appropriate year/sex/location if the age of the study participants was not reported.

We used the Global Enteric Multicenter Study (GEMS), a seven-site, case-control study of moderate-to-severe diarrhoea in children under 5 years,<sup>1</sup> to calculate odds ratios for the diarrhoeal pathogens based on a molecular diagnostic case definition.

For GBD 2017, we added an additional 40,000 stool samples analyzed using quantitative polymerase chain reaction (qPCR) from The Etiology, Risk Factors, and Interactions of Enteric Infections and Malnutrition and the Consequences for Child Health and Development Project (MAL-ED) study to the roughly 10,000 samples from the GEMS reanalysis.<sup>2-6</sup>

### Modelling strategy

**Cause of death.** Diarrhoeal disease mortality was estimated in the Cause of Death Ensemble modelling platform (CODEm). We estimated diarrhoea mortality separately for males and females and for children under 5 years and older than 5 years. We used country-level covariates to inform our CODEm models (**Table 2**). We evaluated our diarrhoeal disease cause of death models using in and out of sample predictive performance.

**Aetiologies.** We estimated diarrhoeal disease aetiologies independently from overall diarrhoea mortality using a counterfactual strategy for enteric adenovirus, *Aeromonas*, *Entamoeba histolytica* (amoebiasis), *Campylobacter*, *Cryptosporidium*, typical enteropathogenic *Escherichia coli* (t-EPEC), enterotoxigenic *Escherichia coli* (ETEC), norovirus, non-typhoidal salmonella infections, rotavirus, and *Shigella*. *Vibrio cholerae* and *Clostridium difficile* were modelled separately.

Diarrhoeal aetiologies are attributed to diarrhoeal deaths using a counterfactual approach. We calculated a population attributable fraction (PAF) from the proportion of severe diarrhoea cases that are positive for each aetiology. The PAF represents the relative reduction in

diarrhoea mortality if there was no exposure to a given aetiology. As diarrhoea can be caused by multiple pathogens and the pathogens may co-infect, PAFs can overlap and add up to more than 100%. We calculated the PAF from the proportion of severe diarrhoea cases that are positive for each aetiology. We assumed that hospitalised diarrhoea cases are a proxy of severe and fatal cases. We used the following formula to estimate PAF:<sup>7</sup>

$$PAF = Proportion * (1 - \frac{1}{OR})$$

Where *Proportion* is the proportion of diarrhoea cases positive for an aetiology and *OR* is the odds ratio of diarrhoea given the presence of the pathogen.

We dichotomised the continuous qPCR test result using the value of the cycle threshold (Ct) that most accurately discriminated between cases and controls. The Ct values range from 0 to 35 cycles representing the relative concentration of the target gene in the stool sample. A low value indicates a higher concentration of the pathogen while a value of 35 indicates the absence of the target in the sample. We used the lower Ct value when we had multiple Ct values for the cutpoint. The case definition for each pathogen is a Ct value that is below the established cutoff point.

We used a mixed effects conditional logistic regression model to calculate the odds ratio for under 1 year and 1-4 years old for each of our pathogens. The stool samples from cases and controls in GEMS were used exclusively to calculate these odds ratios as we assumed that the association between pathogens and moderate-to-severe diarrhoea is a proxy for fatal outcomes. The odds ratio for 1-4 years was applied to all GBD age groups over 5 years. There were three pathogen-age odds ratios that were not statistically significant: *Aeromonas* and *Amoebiasis* in under 1 year and *Campylobacter* in 1-4 years. The mean value of the odds ratio was above 1 in all three cases so we transformed the odds ratios for these three exceptions only in log-space such that exponentiated values could not be below 1. The transformation was:

$$Odds\ ratio = exp(log(OR) - 1) + 1$$

We modelled the proportion data using the meta-regression tool DisMod-MR to estimate the proportion of positive diarrhoea cases for each separate aetiology by location/year/age/sex and to adjust for the covariates.

We used the estimated sensitivity and specificity of the original laboratory diagnostic test results from the pooled GEMS and MALED qPCR stool samples compared to the qPCR test result to adjust our proportion before we computed the PAF:<sup>8</sup>

$$Proportion_{True} = \frac{(Proportion_{Observed} + Specificity - 1)}{(Sensitivity + Specificity - 1)}$$

We used this correction to account for the fact that the proportions we used are based on a new test that is not consistent with the laboratory-based case definition (qPCR versus GEMS conventional laboratory testing for pathogens).<sup>9</sup> Because differences in the type of PCR used in

the original (non-reference qPCR diagnostic) between GEMS and MALED in detecting norovirus, we combined the sensitivity and specificity results for norovirus such that 50% of the draws were coming from GEMS test results exclusively and 50% of the draws were coming from MALED test results exclusively. Additionally, because the original laboratory diagnostic technique used for *Campylobacter* in MALED was one not commonly used, we only used GEMS to determine the sensitivity and specificity of bacterial culture compared to qPCR in detecting *Campylobacter*.<sup>10</sup>

Our literature review extracted the proportion of any enteropathogenic *Escherichia coli* (EPEC) without differentiating between typical (tEPEC) and atypical (aEPEC). In order to be consistent with the odds ratios that we obtained, we adjusted our proportion estimates of any EPEC to typical EPEC only. This adjustment was informed by a subset of our literature review that reported both atypical and typical EPEC. We estimated a ratio by super-region of tEPEC to any EPEC and adjusted our proportion estimates accordingly. We found that the majority of EPEC diarrhoea cases were positive for atypical EPEC, consistent with other published work.<sup>11</sup>

For *Vibrio cholerae* (cholera), we used the literature review to estimate expected number of cholera cases for each country-year using the incidence of diarrhoea, estimated using DisMod-MR, and the proportion of diarrhoea cases that are positive for cholera. We assigned cholera PAF using odds ratios from the qPCR results to estimate a number of cholera-attributable cases. We compared this expected number of cholera cases to the number reported to the World Health Organization at the country-year level.<sup>12</sup> We modelled the underreporting fraction to correct the cholera case notification data for all countries using health system access and the diarrhoea SEV scalar to predict total cholera cases. We used the age-specific proportion of positive cholera samples in DisMod and our incidence estimates to predict the number of cholera cases for each age/sex/year/location. Finally, we modelled the case fatality ratio of cholera using DisMod-MR and to estimate the number of cholera deaths.

For *Clostridium difficile*, we modelled incidence and mortality in DisMod-MR for each age, sex, year, location. DisMod-MR is a Bayesian meta-regression tool that uses spatiotemporal information as priors to estimate prevalence, incidence, remission, and mortality for *Clostridium difficile* infection. DisMod-MR uses a compartmental model to relate prevalence, incidence, remission, and mortality. We set remission in our model to 1 month.

**Table 1. Cause-specific mortality input data.**

| Input data               | GBD 2017               |
|--------------------------|------------------------|
| Total data sources       | 19,665 geography-years |
| Vital registration data  | 17,734 geography-years |
| Sample registration data | 740 geography-years    |
| Verbal autopsy data      | 1,042 geography-years  |
| Surveillance data        | 509 geography-years    |

**Figure 1. Number of geography-years of mortality data used in diarrhoea mortality modelling**

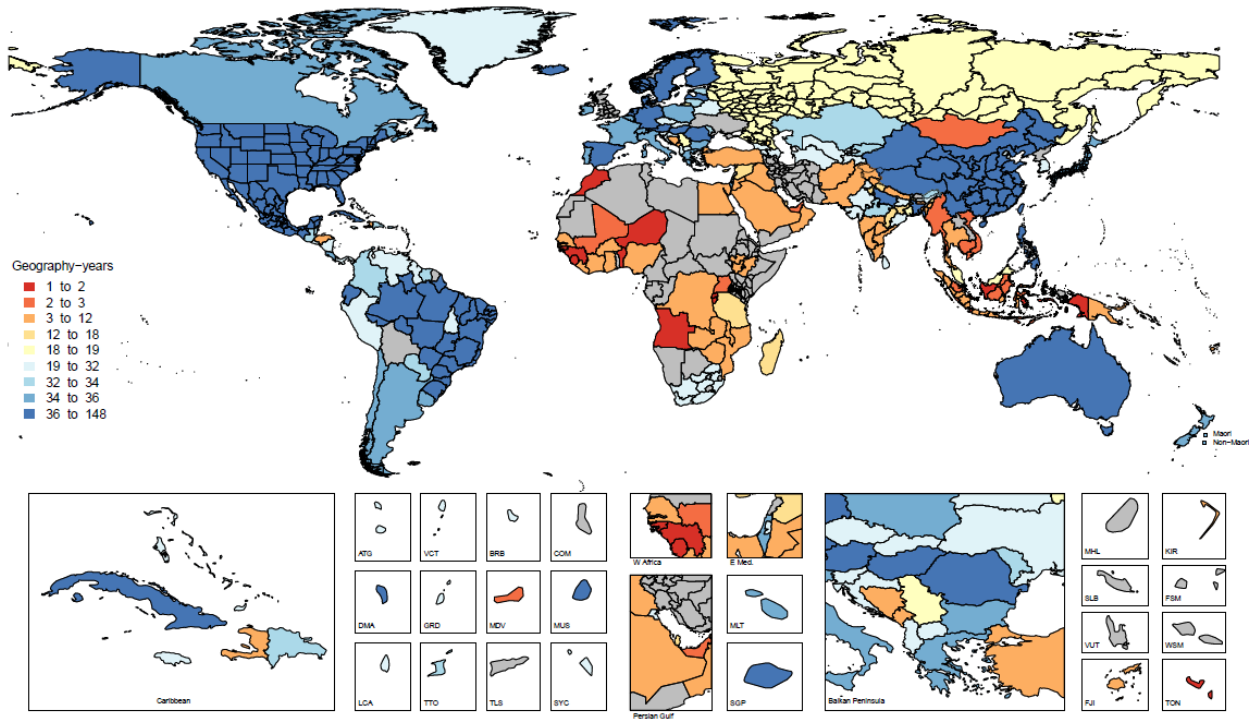

**Table 2. The covariates used in diarrhoea mortality modelling. Table 2A shows the covariates used in the 0-4 years model and Table 2B shows the covariates used in the 5-95+ years model.** The *Level* represents the strength of the association between the covariate and diarrhoea mortality from 1 (proximally related) to 3 (distally related). The *Direction* indicates the positive or negative association between the covariate and diarrhoea mortality.

**Table 2A. The covariates used in the 0-4 years model**

| Level | Covariate                                 | Direction |
|-------|-------------------------------------------|-----------|
| 1     | Diarrhoea SEV                             | +         |
|       | Childhood stunting SEV                    | +         |
|       | Sanitation SEV                            | +         |
|       | Water SEV                                 | +         |
|       | Childhood underweight SEV                 | +         |
|       | Childhood wasting SEV                     | +         |
|       | Short gestation SEV                       | +         |
|       | Low weight gestation SEV                  | +         |
|       | Oral rehydration solution treatment       | -         |
|       | Safe sanitation                           | -         |
|       | Safe water                                | -         |
| 2     | Vitamin A deficiency                      | +         |
|       | Zinc deficiency                           | +         |
|       | Healthcare access and quality index       | -         |
|       | Rotavirus vaccine                         | -         |
|       | Zinc treatment for diarrhoea              | -         |
| 3     | Breastfeeding SEV                         | +         |
|       | Handwashing                               | -         |
|       | LDI per capita                            | -         |
|       | Maternal education years                  | -         |
|       | Socio-demographic Index                   | -         |
|       | Population density < 150/km <sup>2</sup>  | 0         |
|       | Population density > 1000/km <sup>2</sup> | 0         |

**Table 2B. The covariates used in the 5-95+ years model.**

| Level | Covariate                                            | Direction |
|-------|------------------------------------------------------|-----------|
| 1     | Diarrhoea summary exposure variable                  | +         |
|       | Safe sanitation summary exposure variable            | +         |
|       | Safe water summary exposure variable                 | +         |
|       | Improved sanitation                                  | -         |
|       | Improved water                                       | -         |
| 2     | Healthcare access and quality index                  | -         |
|       | Rotavirus vaccine coverage                           | -         |
| 3     | Education years per capita                           | -         |
|       | LDI per capita                                       | -         |
|       | Mean BMI                                             | -         |
|       | Socio-demographic Index                              | -         |
|       | Population density greater than 1000/km <sup>2</sup> | 0         |



## References

- 1 Kotloff KL, Nataro JP, Blackwelder WC, *et al.* Burden and aetiology of diarrhoeal disease in infants and young children in developing countries (the Global Enteric Multicenter Study, GEMS): a prospective, case-control study. *Lancet Lond Engl* 2013; **382**: 209–22.
- 2 Platts-Mills JA, Babji S, Bodhidatta L, *et al.* Pathogen-specific burdens of community diarrhoea in developing countries: a multisite birth cohort study (MAL-ED). *Lancet Glob Health* 2015; **3**: e564-575.
- 3 MAL-ED Network Investigators. The MAL-ED study: a multinational and multidisciplinary approach to understand the relationship between enteric pathogens, malnutrition, gut physiology, physical growth, cognitive development, and immune responses in infants and children up to 2 years of age in resource-poor environments. *Clin Infect Dis Off Publ Infect Dis Soc Am* 2014; **59 Suppl 4**: S193-206.
- 4 Kotloff KL, Nataro JP, Blackwelder WC, *et al.* Burden and aetiology of diarrhoeal disease in infants and young children in developing countries (the Global Enteric Multicenter Study, GEMS): a prospective, case-control study. *Lancet Lond Engl* 2013; **382**: 209–22.
- 5 Liu J, Platts-Mills JA, Juma J, *et al.* Use of quantitative molecular diagnostic methods to identify causes of diarrhoea in children: a reanalysis of the GEMS case-control study. *Lancet Lond Engl* 2016; **388**: 1291–301.
- 6 Platts-Mills J, Liu J, Rogawski E. Aetiology, burden and clinical characteristics of diarrhoea in children in low-resource settings using quantitative molecular diagnostics: results from the MAL-ED cohort study. *Lancet Glob Health* 2018; Accepted.
- 7 Miettinen OS. Proportion of disease caused or prevented by a given exposure, trait or intervention. *Am J Epidemiol* 1974; **99**: 325–32.
- 8 Reiczigel J, Földi J, Ozsvári L. Exact confidence limits for prevalence of a disease with an imperfect diagnostic test. *Epidemiol Infect* 2010; **138**: 1674–8.
- 9 Platts-Mills JA, Operario DJ, Houpt ER. Molecular diagnosis of diarrhea: current status and future potential. *Curr Infect Dis Rep* 2012; **14**: 41–6.
- 10 Platts-Mills JA, Liu J, Gratz J, *et al.* Detection of *Campylobacter* in stool and determination of significance by culture, enzyme immunoassay, and PCR in developing countries. *J Clin Microbiol* 2014; **52**: 1074–80.
- 11 Ochoa TJ, Barletta F, Contreras C, Mercado E. New insights into the epidemiology of enteropathogenic *Escherichia coli* infection. *Trans R Soc Trop Med Hyg* 2008; **102**: 852–6.
- 12 World Health Organization. Global Health Observatory data repository: Cholera. 2016. <http://apps.who.int/gho/data/node.main.174?lang=en> (accessed Aug 25, 2016).

# Typhoid fever

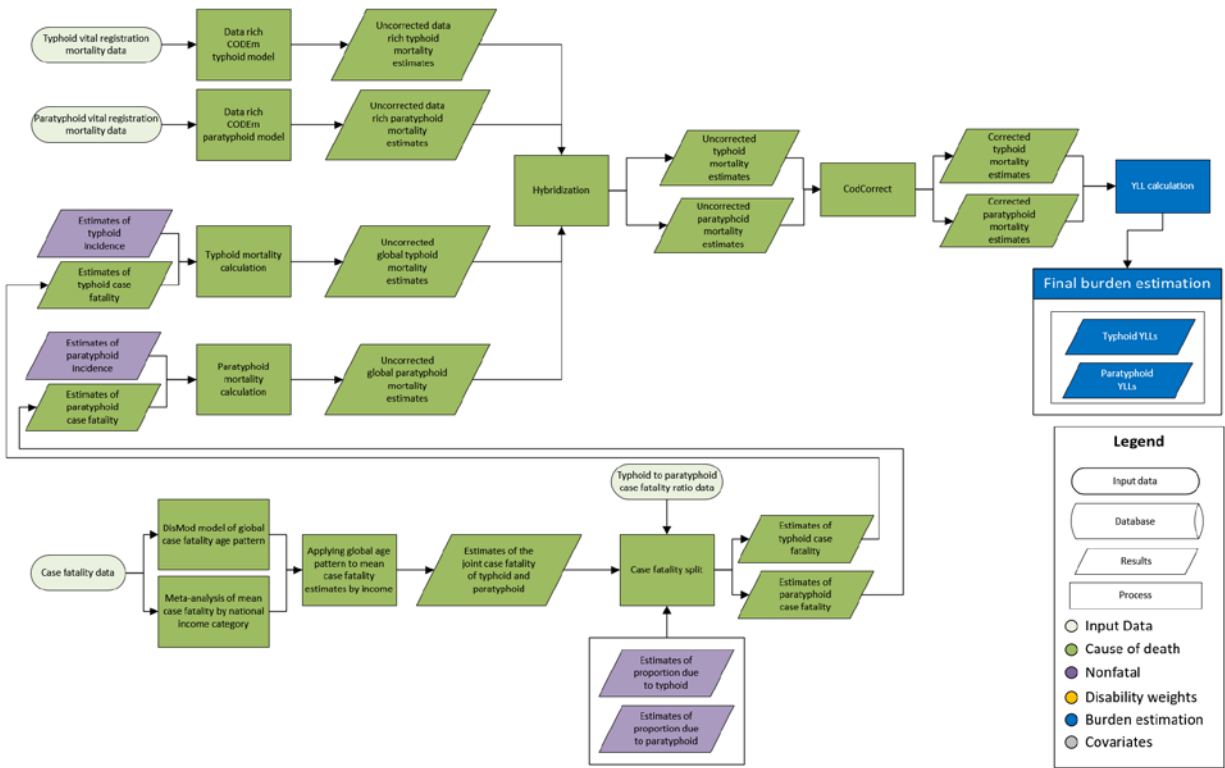

## Input data

Our CODEm model used all available data in the cause of death database from data-rich countries. No data were outliered for this cause. For the natural history model, our incidence dataset included a combination of data from prospective cohort studies and national surveillance systems. Similarly, data on proportions due to typhoid and paratyphoid included a combination of prospective cohort studies and national surveillance systems. Case fatality data were from national surveillance systems and hospital databases.

## Modelling strategy

We model typhoid deaths using a hybrid modelling strategy with two components: 1) for data-rich locations we estimate typhoid mortality using a CODEm model of CoD data; and 2) in all other locations (i., not data-rich) we use a natural history model in which we derive deaths as the product of cases and case fatality.

The CODEm model included six covariates:

| Level | Covariate                                                            | Direction |
|-------|----------------------------------------------------------------------|-----------|
| 1     | Sanitation (proportion with access)                                  | -         |
|       | Improved water source (proportion of the population with access)     | -         |
|       | Proportion of the population living in the Indian Ocean monsoon belt | +         |
|       | SEV unsafe water                                                     | +         |

|   |                                     |   |
|---|-------------------------------------|---|
|   | SEV unsafe sanitation               | + |
| 2 | Healthcare access and quality index | - |

For the natural history model, we first model total incidence of typhoid and paratyphoid combined. Second, we model the proportion of this total due to typhoid and the proportion due to paratyphoid. Third, we estimate case fatality by age and national income category for typhoid and paratyphoid combined. Fourth, we use data on the relative fatality of typhoid and paratyphoid to split the joint case fatality estimates into typhoid- and paratyphoid-specific case fatality estimates. Finally, we estimate cause-specific mortality rates as the product of incidence and case fatality.

Total incidence was modelled using DisMod-MR 2.1, using the proportion of the population with access to clean water, and the proportion of the population living in the Indian Ocean monsoon belt as covariates. We performed a crosswalk using a study-level covariate indicating sources that were based on passive versus active surveillance, with active surveillance as the reference. This adjusts for incomplete case capture by passive surveillance. Incidence data were inflated to account for poor diagnostic sensitivity, based on a meta-analysis of the sensitivity of blood culture, the most common diagnostic used for typhoid. Similarly, we used two DisMod models to estimate aetiologic proportions: one for the proportion of total incidence due to typhoid, and one for the proportion due to paratyphoid.

Case fatality data were too limited to allow for a complete DisMod model, or to allow for varying estimates by time and space. We had sufficient data, however, to estimate case fatality by age and by three categories of national income. We used DisMod to extract a global age-pattern in case fatality, and meta-regression to estimate the mean case fatality by income category. Finally, we estimated the relative risk of death from typhoid relative to paratyphoid based on data from Chinese surveillance and used that relative risk to estimate case fatality separately for typhoid and paratyphoid, by age and income.

Finally, we estimated typhoid mortality as the product of total incidence, the proportion of the total due to typhoid, and case fatality for typhoid. We propagated uncertainty through every step of the modelling process by pulling 1,000 draws from the distribution of each model component (eg, incidence, proportion due to typhoid, overall case fatality, case fatality age pattern, relative fatality of typhoid versus paratyphoid), and performing all calculations at the draw level.

For GBD 2016 we estimated typhoid mortality in all locations using a natural history model, and the introduction of the data-rich CODEm estimates is a new improvement for GBD 2017. We have made no substantive changes to our natural history modelling strategy between GBD 2016 and 2017.

# Paratyphoid fever



## Input data

Our CODEm model used all available data in the cause of death database from data-rich countries. No data were outliered for this cause. For the natural history model, our incidence dataset included a combination of data from prospective cohort studies and national surveillance systems. Similarly, data on proportions due to typhoid and paratyphoid included a combination of prospective cohort studies and national surveillance systems. Case fatality data were from national surveillance systems and hospital databases.

## Modelling strategy

We model paratyphoid deaths using a hybrid modelling strategy with two components: 1) for data-rich locations we estimate paratyphoid mortality using a CODEm model of CoD data; and 2) in all other locations (ie, not data-rich) we use a natural history model in which we derive deaths as the product of cases and case fatality.

The CODEm model included six covariates:

| Level | Covariate                                                            | Direction |
|-------|----------------------------------------------------------------------|-----------|
| 1     | Sanitation (proportion with access)                                  | -         |
|       | Improved water source (proportion of the population with access)     | -         |
|       | Proportion of the population living in the Indian Ocean monsoon belt | +         |
|       | SEV unsafe water                                                     | +         |

|   |                                     |   |
|---|-------------------------------------|---|
|   | SEV unsafe sanitation               | + |
| 2 | Healthcare access and quality index | - |

For the natural history model, we first model total incidence of typhoid and paratyphoid combined. Second, we model the proportion of this total due to typhoid and the proportion due to paratyphoid. Third, we estimate case fatality by age and national income category for typhoid and paratyphoid combined. Fourth, we use data on the relative fatality of typhoid and paratyphoid to split the joint case fatality estimates into typhoid- and paratyphoid-specific case fatality estimates. Finally, we estimate cause-specific mortality rates as the product of incidence and case fatality.

Total incidence was modelled using DisMod-MR 2.1, using the proportion of the population with access to clean water, and the proportion of the population living in the Indian Ocean monsoon belt as covariates. We performed a crosswalk using a study-level covariate indicating sources that were based on passive versus active surveillance, with active surveillance as the reference. This adjusts for incomplete case capture by passive surveillance. Incidence data were inflated to account for poor diagnostic sensitivity, based on a meta-analysis of the sensitivity of blood culture, the most common diagnostic used for typhoid. Similarly, we used two DisMod models to estimate aetiologic proportions: one for the proportion of total incidence due to typhoid, and one for the proportion due to paratyphoid.

Case fatality data were too limited to allow for a complete DisMod model, or to allow for varying estimates by time and space. We had sufficient data, however, to estimate case fatality by age and by three categories of national income. We used DisMod to extract a global age-pattern in case fatality, and meta-regression to estimate the mean case fatality by income category. Finally, we estimated the relative risk of death from typhoid relative to paratyphoid based on data from Chinese surveillance and used that relative risk to estimate case fatality separately for typhoid and paratyphoid, by age and income.

Finally, we estimated paratyphoid mortality as the product of total incidence, the proportion of the total due to paratyphoid, and case fatality for paratyphoid. We propagated uncertainty through every step of the modelling process by pulling 1,000 draws from the distribution of each model component (eg, incidence, proportion due to typhoid, overall case fatality, case fatality age pattern, relative fatality of typhoid versus paratyphoid), and performing all calculations at the draw level.

For GBD 2016 we estimated paratyphoid mortality in all locations using a natural history model, and the introduction of the data-rich CODEm estimates is a new improvement for GBD 2017. We have made no substantive changes to our natural history modelling strategy between GBD 2016 and 2017.

## Invasive non-typhoidal salmonella (iNTS)

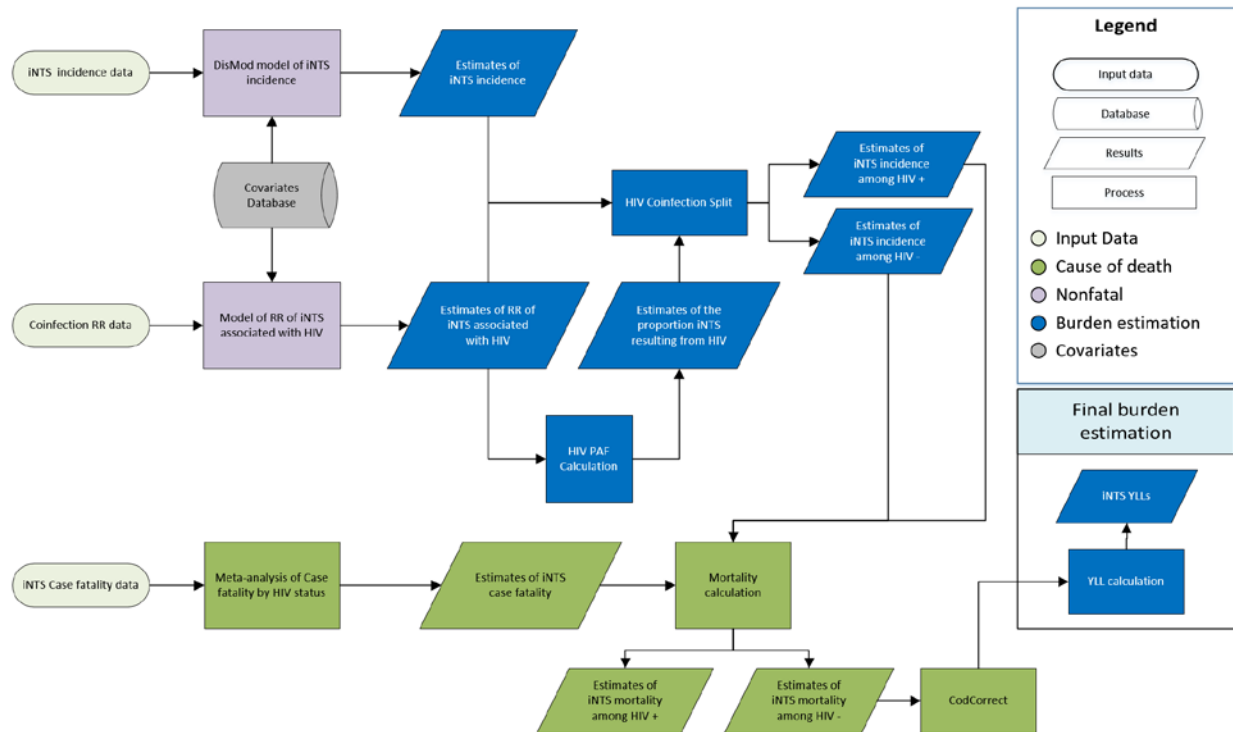

### Input data

Incidence estimates for the natural history model are modelled using an incidence dataset based principally on prospective cohort studies and facility-based surveillance. Similarly, data on case fatality and co-infection come from prospective cohort studies and facility-based surveillance.

### Modelling strategy

We model iNTS deaths using a natural history model in which we derive deaths as the product of cases and case fatality. Incidence was modelled using DisMod-MR 2.1, using the HIV mortality rate, malaria incidence adjusted for antimalarial coverage and drug effectiveness, and the summary exposure value (SEV), unsafe water, as covariates. We estimated the relative risk of iNTS comparing people with HIV to those without using a negative binomial model with log-age and log of the summary exposure value (SEV) for water as predictors. We used the resulting relative risk estimates and HIV prevalence estimates to calculate the proportion of iNTS that was attributable to HIV in each location, year, age and sex. Using these proportions, we divided iNTS cases into those that were attributable to HIV and those that were not. We modelled case fatality by age and Socio-demographic Index (SDI) separately for those with and without HIV using a generalised additive model, parameterising age with P-splines, and estimated mortality as the product of incidence and case fatality. Where iNTS occurs among those with HIV, we assume that iNTS is an opportunistic infection and that HIV is therefore the underlying cause of death. We therefore estimate deaths with iNTS as the underlying cause as total iNTS deaths times the proportion of cases not attributable to HIV. iNTS is a new cause for GBD 2017.

## Other Intestinal Infectious Diseases

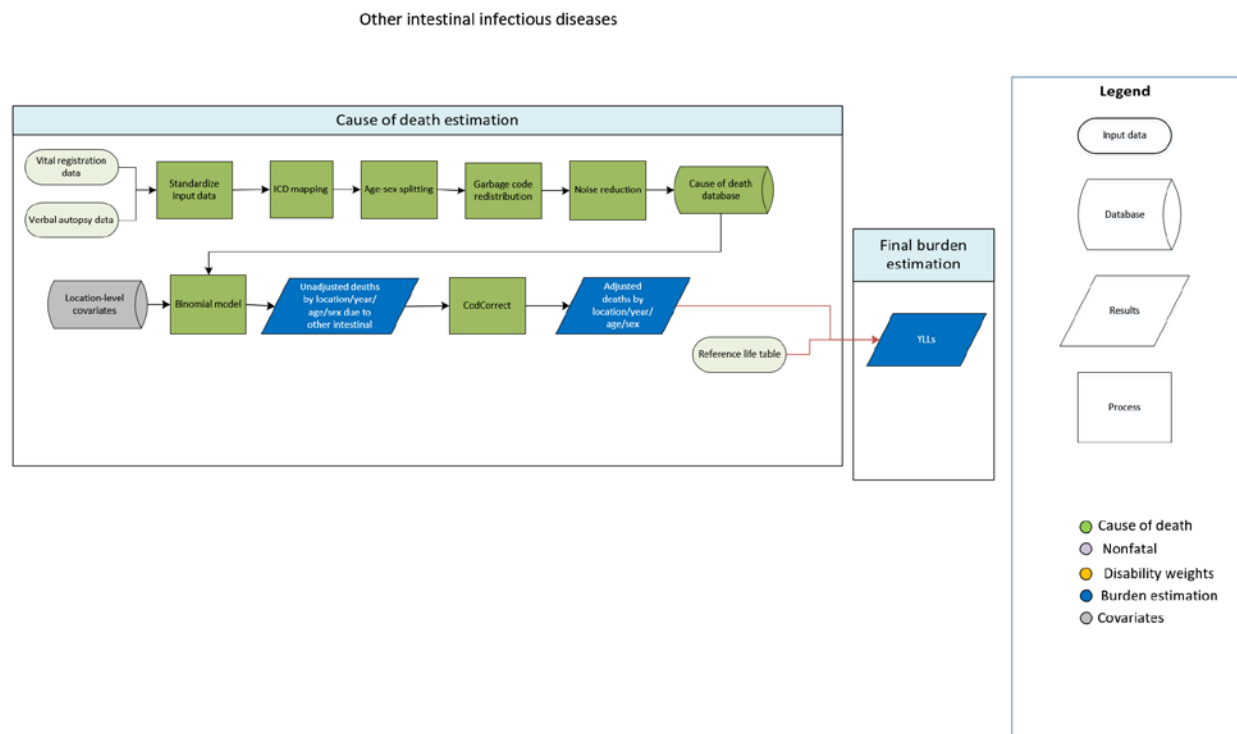

### Input data

We modelled other intestinal infectious disease mortality using all available data in the cause of death database. Data points were outliered if they reported an improbable number of deaths or if their inclusion in the model yielded distorted trends. In some cases, multiple data sources for the same location differed dramatically both in their quality and reported other intestinal infectious disease mortality (eg, a verbal autopsy and vital registration source). In these cases the lower-quality data source was outliered.

### Modelling strategy

We modelled other intestinal infectious disease mortality using a custom binomial model of all data in the CoD database. We used the number of cause-specific deaths as the outcome, with the all-cause mortality envelope as the exposure term. We included the square root of Socio-demographic Index, age group, and sex as covariates, and included a random effect on region

We have made no substantive changes to the modelling strategy in 2017.

# Malaria

## Malaria cause of death estimation in Sub-Saharan Africa

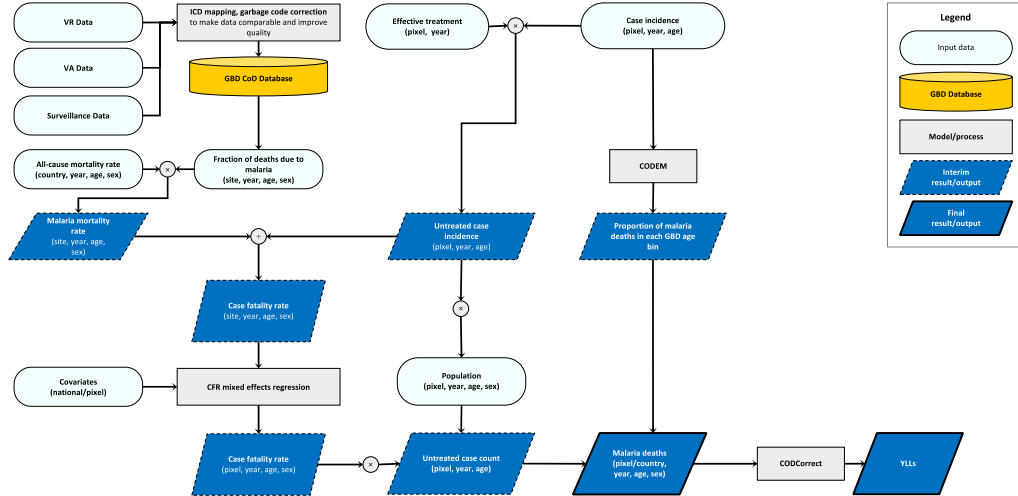

## Malaria cause of death estimation outside Sub-Saharan Africa

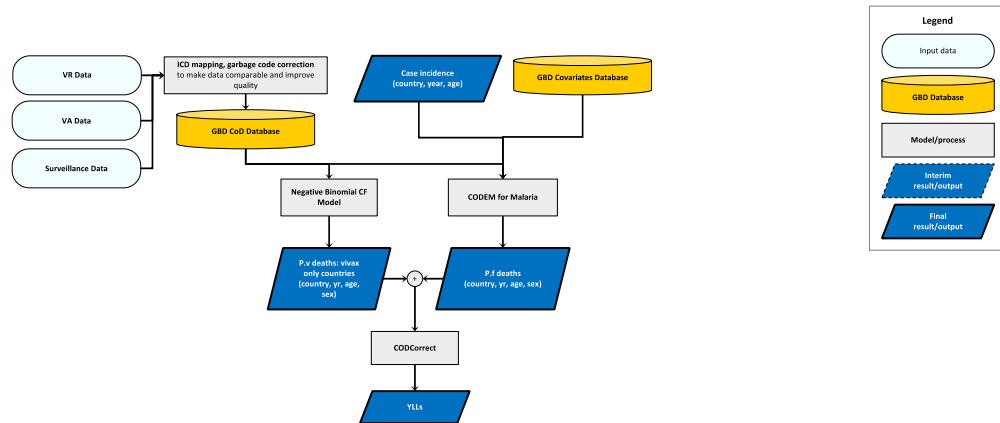



## Input data and methodological summary for malaria

### Overview

Variability in the type and abundance of CoD and related data meant that three distinct approaches were developed to estimate malaria mortality due to (i) *Plasmodium falciparum* inside sub-Saharan Africa; (ii) *P. falciparum* outside sub-Saharan Africa; and (iii) *P. vivax* in countries without Falciparum malaria.

### Input data

For the Outside of sub-Saharan Africa and *P. vivax* models, data included vital registration, verbal autopsy, and surveillance data from the cause of death (CoD) database. Unlike other causes of death, we did not redistribute deaths to malaria. For the Africa models, we only used CoD data (mostly verbal autopsy) where we have been able to successfully geo-reference the site (ie, find associated geographic coordinates). Systematic literature reviews for malaria were not conducted.

Our outlier criteria excluded data points that (i) were implausibly high or low relative to global or regional patterns, (ii) substantially conflicted with established age or temporal patterns, or (iii) significantly conflicted with other data sources conducted from the same locations or locations with similar characteristics (ie, local Socio-demographic Index).

### Modelling strategy

The malaria modelling strategy was carried out in three parts, and the covariates are:

| Level | Covariate                              | Direction |
|-------|----------------------------------------|-----------|
| 1     | <i>Pf</i> -only incidence              | 1         |
| 1     | Effective antimalarial treatment ratio | -1        |
| 1     | Effective antimalarial treatment       | -1        |

### ***P. falciparum*: sub-Saharan Africa**

For most GBD causes, epidemiologic measures may be used as covariates in a traditional CODEm approach, if at all. To estimate the fatal burden of *P. falciparum* malaria in Africa, we used epidemiological measures in our estimation process directly. The Malaria Atlas Project (MAP) at the University of Oxford has generated updated spatiotemporal “cubes” estimating clinical incidence (rates and case counts) for each 5x5 km pixel across Africa, by year, from 1980 to 2017, specified by three broad age bins (0–5, 5–14 and 15+). MAP has also generated an equivalent spatiotemporal prediction of access to effective antimalarial drugs (combining access to care, the fraction of malaria cases receiving different classes of antimalarial, and the estimated country-year-specific efficacy of each antimalarial class though time). This estimated treatment rate was combined with the incidence rate cube to derive a third cube estimating the incidence of untreated cases at the pixel level.

For each site-year for which CoD malaria cause fraction data were available we (i) estimated a site-year-specific malaria mortality rate as the product of malaria cause fraction and all-cause mortality rate (with the latter drawn from national-level values); (ii) divided the malaria mortality rate by the site-year-specific estimate of untreated malaria incidence rate (drawn from the MAP cube) to estimate a site-year-specific case fatality rate (CFR) among untreated malaria cases. These derived site-year-specific CFR values were then used in a mixed-effects regression model to estimate pixel-year CFR for each 5x5 km

grid cell. The models used the following as covariates: the log of country-year all-cause mortality, pixel-year night-time lights, accessibility, fractional land-cover classes, and study-specific age and sex, with the location of each study site as a national-level random effect. Data were weighted by sample size (ie, the number of all-cause deaths observed in each study site-year).

Pixel-year predictions of CFR were then multiplied by the corresponding untreated incidence rate from the MAP cube to yield a pixel-year mortality rate estimate, which was then multiplied by pixel-year population to compute pixel-year malaria death counts. These were then aggregated to yield the required GBD national or subnational death estimates.

To disaggregate into GBD age bins, we separately ran a traditional national-level CODEm model with covariates: *Pf* incidence rate and access to effective antimalarial drugs. The resulting predicted age-patterns were used to split the country-year mortality estimates proportionally.

#### ***P. falciparum*: outside of sub-Saharan Africa**

In locations outside of sub-Saharan Africa, we continued to use a traditional CODEm approach, mirroring closely what was used in GBD 2016. The approach was also applied to some countries on the continent of Africa with either very low incidence or relatively robust routine surveillance systems, including Algeria, Egypt, Morocco, Comoros, Mauritius, Cape Verde, Sao Tome, Principe, Botswana, Namibia, Eritrea, Djibouti, and South Africa. The model included the following covariates: *Pf* incidence rate, access to effective antimalarial drugs.

#### ***P. vivax*: countries without *P. falciparum* transmission**

For countries where the main/exclusive strain of malaria was *P. vivax*, deaths were estimated using a zero-inflated negative binomial mixed model where the outcome is study deaths. The model included as fixed effect the logarithm of mortality rate, age, and sex. Locations were included as random effects.

The results from the *P. vivax*, Outside of Africa, and Africa models were collated, uploaded in CODEm and marked as best model in order to incorporate the estimation in the CodCorrect algorithm.

#### References

- 1 Bhatt S, Weiss DJ, Cameron E, *et al*. The effect of malaria control on Plasmodium falciparum in Africa between 2000 and 2015. *Nature* 2015; **526**: 207–11.

## Chagas Disease

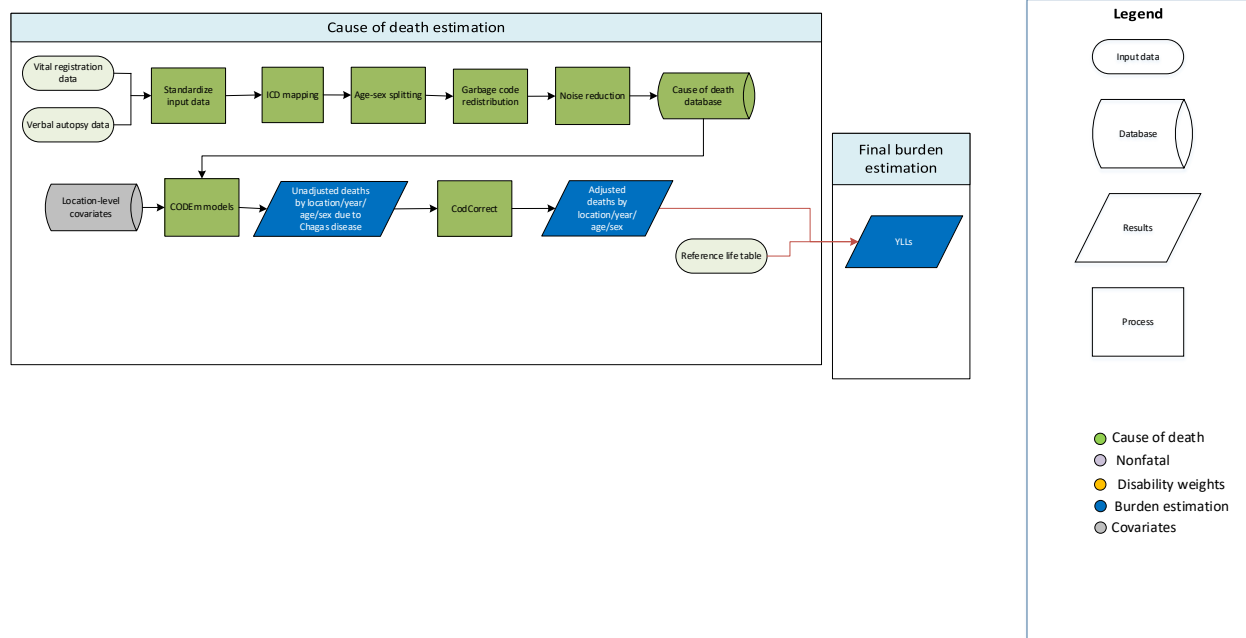

### Input data

We modelled Chagas mortality using all available data in the cause of death database. No data were outliered for this cause.

### Modelling strategy

We modelled Chagas mortality using a two-model hybrid approach: 1) a CODEm model of all Chagas-endemic countries of Latin America using all data in the CoD database; and 2) estimates of mortality from imported cases in non-endemic, data-rich countries. Where Chagas deaths were reported in non-endemic data-rich countries, we produced non-zero estimates by drawing from a beta distribution defined based on number of reported deaths and the underlying sample size. Estimates of Chagas mortality in endemic countries were drawn from the CODEm model.

The CODEm models included three covariates:

| Level | Covariate                           | Direction |
|-------|-------------------------------------|-----------|
| 1     | Chagas prevalence                   | +         |
| 2     | Healthcare access and quality index | -         |
|       | Socio-demographic Index             | -         |

We have made no substantive changes in the modelling strategy from GBD 2016 to GBD 2017 for Chagas-endemic countries.

# Visceral Leishmaniasis

Visceral leishmaniasis – GBD2017

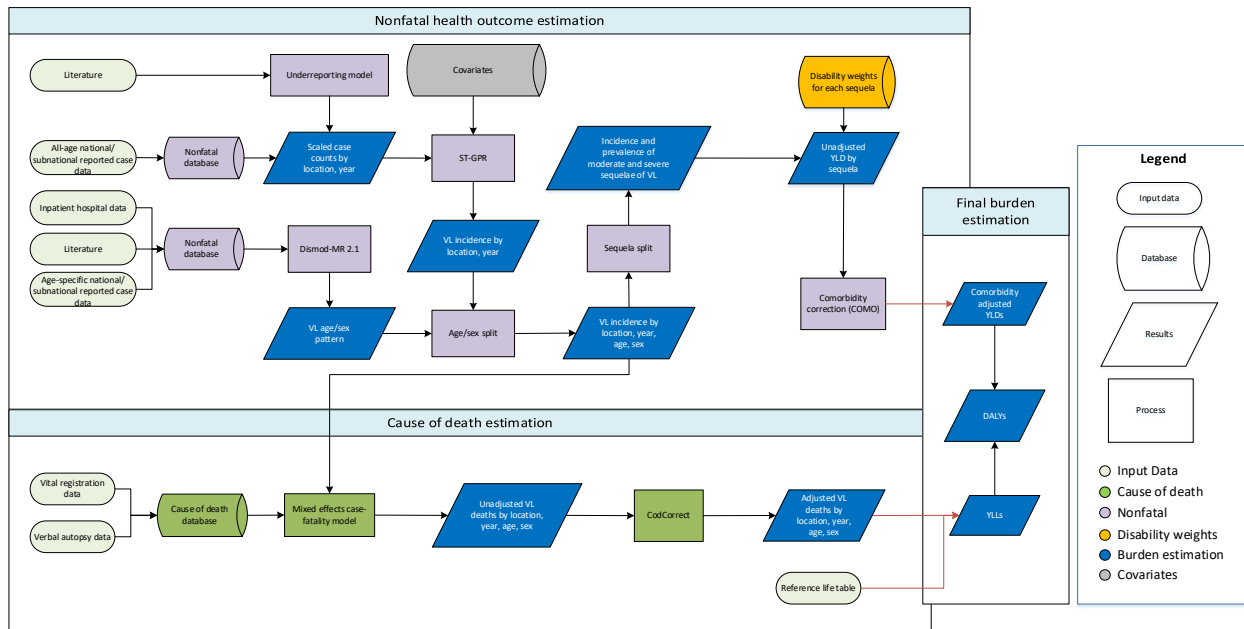

Visceral leishmaniasis (VL) is the most serious manifestation of disease caused by the *Leishmania* parasite, transmitted through the bite of phlebotomine sandflies. Those infected typically present with fever, weight loss, anaemia, leukopenia, thrombocytopenia, and enlargement of the spleen and liver. If left untreated, it can be fatal. Transmission varies by geographic region, with a variety of reservoir hosts implicated, and different vector species associated, maintaining both zoonotic and anthroponotic transmission cycles. The ICD9 code related to visceral leishmaniasis is 085.0, and the ICD10 code is B55.0.

## Description of general methodology

The fatal estimation process for visceral leishmaniasis is built from incident case notification data representative of the GBD geographic location, which is adjusted for underreporting. The upscaled all-age, both-sex case counts are modelled using spatiotemporal Gaussian process regression (ST-GPR) in order to impute for missing location-year combinations as well as to account for further biases and inaccuracies in reporting. Datasets that disaggregate VL cases by age and sex are modelled using DisMod to produce a global age-sex split which is applied to the all-age, both-sex envelope estimates resulting from ST-GPR. The mean incidence estimates are compared with estimated death counts to generate a case-fatality rate model that is subsequently used to estimate deaths for each age, sex, location, year.

## Input Data – Case Notification time series

Current estimation for the all-age, both-sex incidence envelope is based upon location-representative information rather than site-specific epidemiological measures due to the absence of global foci maps allowing for upscaling of geographically precise information. The primary data resource therefore is the case notification time-series reported by National Control Programs and Ministries of Health to the World Health Organization. This is supplemented by systematic literature review (last updated for GBD 2015) to identify alternate sources of data for years missing information. For countries with subnational

estimates, in-country collaborators have compiled information for respective programs, or identified key resources.

#### **Input Data – Underreporting assessments**

It is recognised that case notification series record only a subset of the true cases present. A review was undertaken to identify articles that compared reported cases with alternate measures to estimate the degree of underreporting. The following search strings were used: 'leish\* AND under\*'; 'active passive leish\*'. Inclusion criteria were broad to maximise spatiotemporal coverage in potential estimates – any report that compared reported statistics with some notion of “truth” (whether capture-recapture, active surveillance, etc.) were extracted. Values for both cutaneous and visceral leishmaniasis were included. For GBD 2017, 12 articles were included, summarised in Table 1.

#### **Input Data – Mortality**

Deaths were extracted from a variety of sources, ranging from vital registration (VR) records, to verbal autopsy (VA) assessments. Deaths assigned to visceral leishmaniasis were processed following central cause of death processing, outlined elsewhere.

| Citation                                                                                                                                                    | GBD location | Time period | Pathogen | Method synopsis                                                                                                                                     | Proportion of “true” cases reported |
|-------------------------------------------------------------------------------------------------------------------------------------------------------------|--------------|-------------|----------|-----------------------------------------------------------------------------------------------------------------------------------------------------|-------------------------------------|
| Copeland <i>et al.</i> , 1990 “Comparison of active and passive case detection of cutaneous leishmaniasis in Guatemala” (Copeland, Arana, and Navin 1990)   | Guatemala    | 1990        | CL       | Comparison of Ministry of Health data with cross-sectional population-based survey to inform estimated number of cases                              | 64/2574                             |
| Yadon <i>et al.</i> 2001 “Assessment of Leishmaniasis notification system in Santiago del Estero, Argentina, 1990-1993” (Yadón <i>et al.</i> 2001)          | Argentina    | 1990–1993   | CL       | Capture-recapture methods were used to evaluate four reporting sources.                                                                             | 94/210                              |
| Sesma <i>et al.</i> 1997 “Leishmaniasis in Navarra: a review of activities” (Sesma and Barricarte 1997)                                                     | Spain        | 1990–1997   | CL, VL   | Comparison of active searching within the region with reporting via Epidemiological Surveillance System                                             | 8/21                                |
| Maia-Elkhoury <i>et al.</i> 2007 “Analysis of visceral leishmaniasis reports by the capture-recapture method” (Maia-Elkhoury <i>et al.</i> 2007)            | Brazil       | 2002–2003   | VL       | Comparison of three notification systems for completeness                                                                                           | 5896/10691                          |
| Singh <i>et al.</i> 2006 “Serious underreporting of visceral leishmaniasis through passive case reporting in Bihar, India” (S. P. Singh <i>et al.</i> 2006) | Bihar, India | 2003        | VL       | Comparison of actively detected cases (identified via household surveys) and governmental health system records. Estimate is among study population | 8/65                                |
| Singh <i>et al.</i> 2006 “Serious underreporting of visceral leishmaniasis through passive case reporting in Bihar, India” (S. P. Singh <i>et al.</i> 2006) | Bihar, India | 2003        | VL       | Comparison of actively detected cases (identified via household surveys) and governmental health system records.                                    | 109/876                             |
| Gkolfinopoulou <i>et al.</i> 2013 “Epidemiology of human leishmaniasis in Greece, 1981-2011” (Gkolfinopoulou <i>et al.</i> 2013)                            | Greece       | 2004–2009   | VL       | Comparing number of cases identified at national reference laboratory with mandatory notification system.                                           | 260/361                             |

|                                                                                                                                                                                                                              |                                     |           |    |                                                                                                                                                                                                                                                                      |                                      |
|------------------------------------------------------------------------------------------------------------------------------------------------------------------------------------------------------------------------------|-------------------------------------|-----------|----|----------------------------------------------------------------------------------------------------------------------------------------------------------------------------------------------------------------------------------------------------------------------|--------------------------------------|
| Singh <i>et al.</i> 2010 “Estimation of under-reporting of Visceral Leishmaniasis cases in Bihar India” (V. P. Singh et al. 2010)                                                                                            | Bihar, India                        | 2006      | VL | Comparison of actual reported number of cases with estimates age-sex stratified incidence proportions for a cohort of 31,324 persons                                                                                                                                 | 34/177                               |
| Hirve <i>et al.</i> 2010 “Effectiveness and feasibility of active and passive case detection in the Visceral Leishmaniasis Elimination Initiative in India, Bangladesh, and Nepal” (Hirve et al. 2010)                       | Bihar, India<br>Nepal<br>Bangladesh | 2008      | VL | Comparing active case detection evaluations (conducting via house-to-house screening) with passive case detection systems                                                                                                                                            | 111/130<br>119/127<br>18/25<br>20/32 |
| Faraj <i>et al.</i> 2016 “Effectiveness and cost of insecticide-treated bed nets and indoor residual spraying for the control of cutaneous leishmaniasis: A cluster-randomized control trial in Morocco” (Faraj et al. 2016) | Morocco                             | 2008–2013 | CL | Comparison of incidence of new CL cases by both active and passive case detection                                                                                                                                                                                    | 409/670                              |
| Das <i>et al.</i> 2014 “Active and passive case detection strategies for the control of leishmaniasis in Bangladesh” (Das et al. 2014)                                                                                       | Bangladesh                          | 2010–2011 | VL | Comparing two districts’ estimates [identified in the paper as being directly comparable] of cases, one via active case detection, the other via passive case detection. Active case detection was via community education and outreach workers targeting households | 756/1087                             |
| Rahman <i>et al.</i> 2015 “Performance of Kala-azar surveillance in Gaffargaon subdistrict of Mymensingh, Bangladesh” (Rahman et al. 2015)                                                                                   | Bangladesh                          | 2010–2011 | VL | Comparison of cases reported to the local health complex versus active search for kala-azar cases                                                                                                                                                                    | 29/58                                |
| Eid <i>et al.</i> 2017 “Assessment of a Leishmaniasis reporting system in tropical Bolivia using the capture-recapture method” (Eid et al. 2017)                                                                             | Bolivia                             | 2013–2014 | CL | Active surveillance during medical campaigns were compared to registered cases reported by the National Program of Leishmaniasis Control                                                                                                                             | 23/86.4                              |

Table 1: Metadata for underreporting scalars used in GBD 2017. For each record, a citation, GBD location of relevance, year, pathogen, brief summary of methods, and output values used in modelling are listed.



## Input data – age/sex-split data

Where possible, information disaggregating location-level statistics by age and sex were extracted.

## Method – geographic restrictions

There are strong climatic and biogeographic constraints on the geographic distribution of VL resulting in a focal rather than cosmopolitan global distribution. As a result, it is necessary to identify locations burdened by the disease through space and time as distinct from countries where VL is absent. Tags were assigned to each location-year based upon the outcome of a search of IHME databases, as well as location-specific searches of PubMed. Each location-year is tagged as follows:

- Present – where a specific citation of either an autochthonous laboratory-confirmed case (ie, a case with PCR, serological, or parasitological diagnosis), reported case (ie, a case noted as VL, but with no supporting diagnostic), or supporting evidence (ie, confirmed infection in animal reservoirs or sandfly vectors)
- Protocol Present – for a given location-year, where no specific citation is used, but is present for another year in the same location, it is assumed that VL is present given that eradication of the pathogen has not been achieved
- Absent – where PubMed location-specific searches returned zero relevant results, in locations scoring -25 or lower as evaluated by Pigott *et al.* (2014) [the threshold for “absence” in that study (Pigott *et al.* 2014)], locations were tagged as Absent
- Protocol Absent – as with Absent, locations with zero relevant PubMed results, but with greater than -25 as evaluated by Pigott *et al.* (2014), were tagged as Protocol Absent (Pigott *et al.* 2014)

### Visceral Leishmaniasis Geographic Restrictions: 2013 (Endemic: 213)

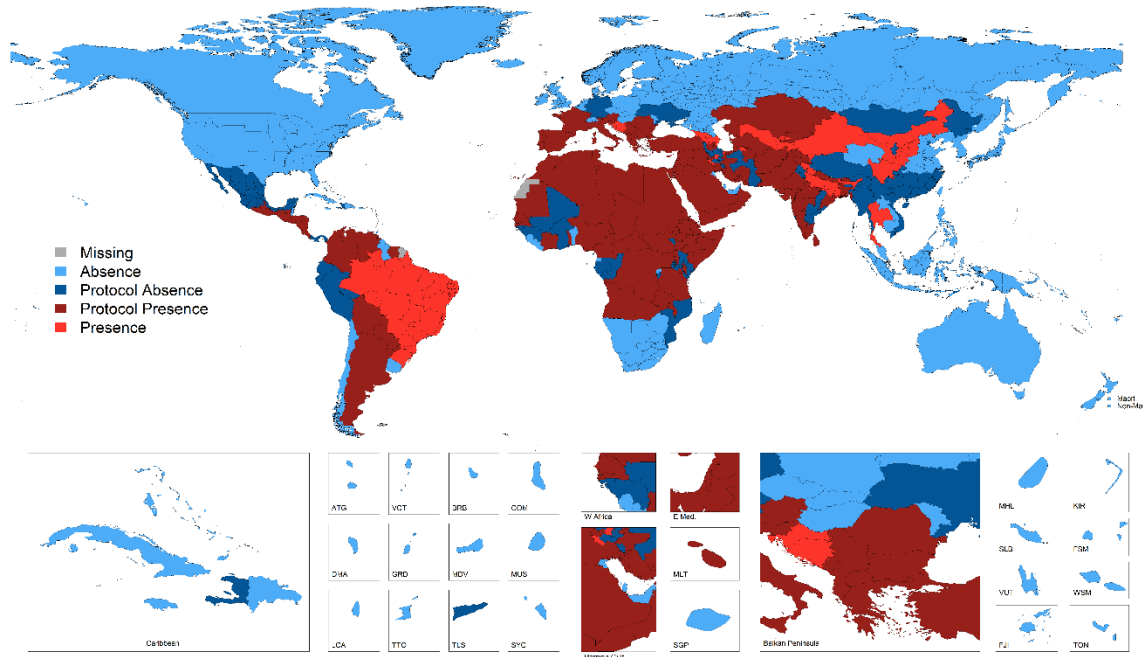

Figure 1: Visceral Leishmaniasis geographic restrictions for the year 2013. GBD locations tagged as present are coloured in red, yellow represents protocol presence, dark blue represents protocol absence, and absence is represented by light blue. Locations missing tags are presented in grey.

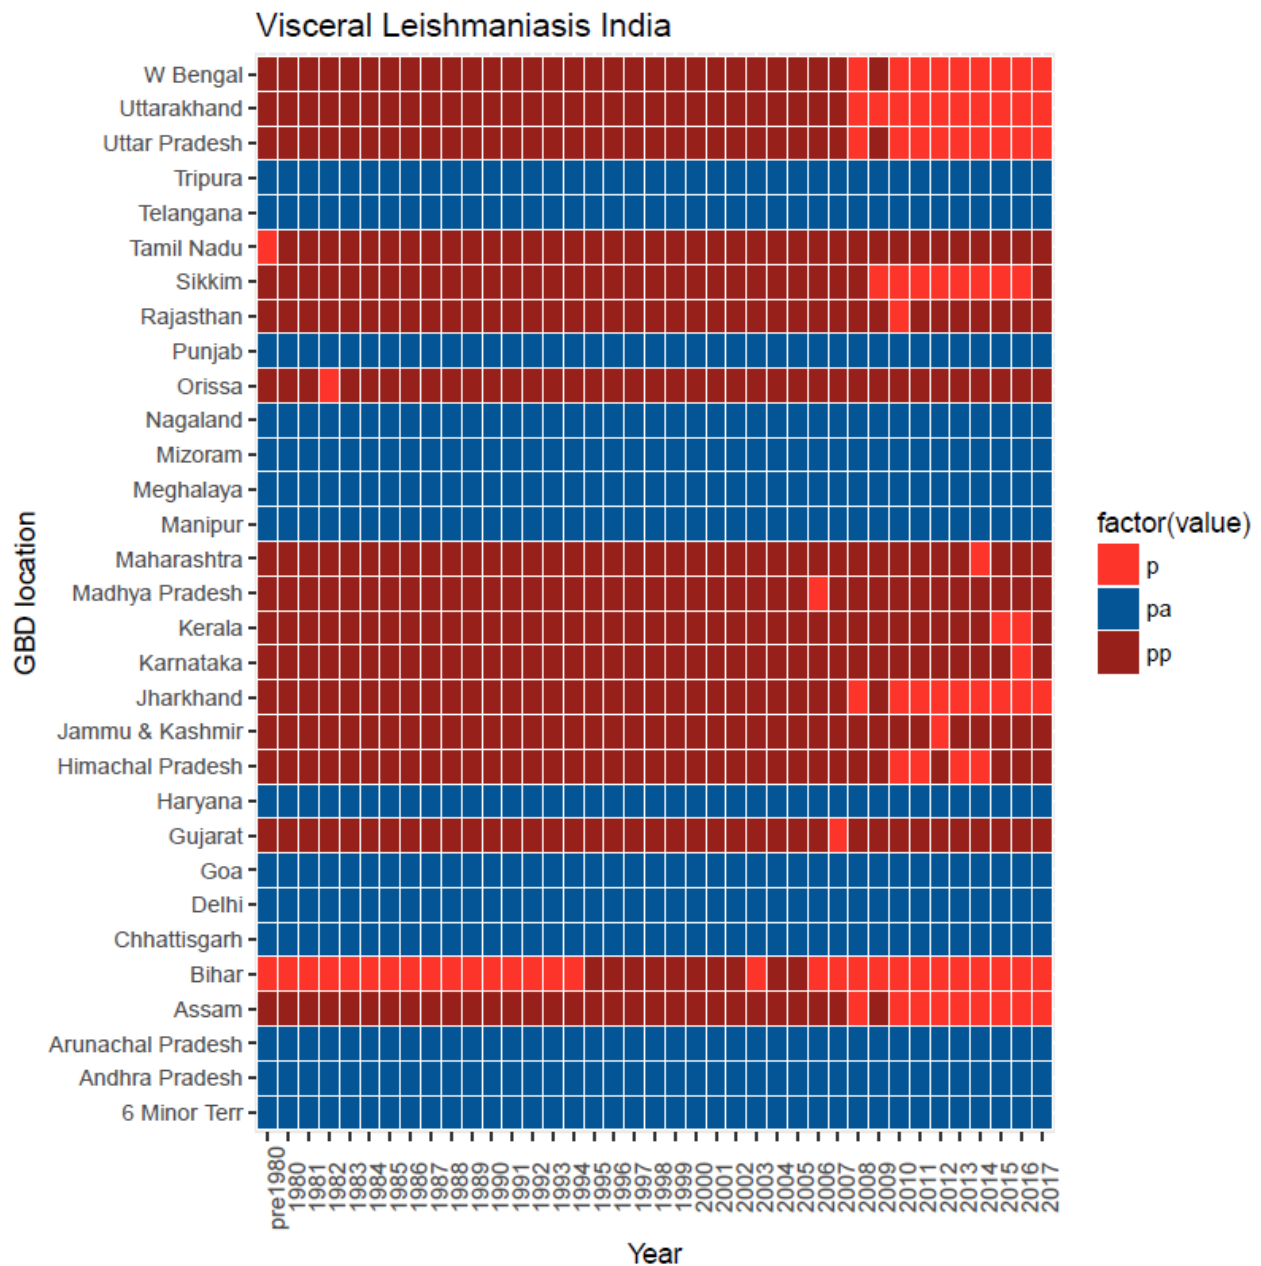

Figure 2: Visceral Leishmaniasis geographic restrictions for Indian subnationals. Locations tagged as present are coloured in red, yellow represents protocol presence, and dark blue represents protocol absence.

Full time series of maps and tables, with relevant GHDx NIDs, are available upon request from [gbdsec@uw.edu](mailto:gbdsec@uw.edu).

#### Method – underreporting modelling and scaled case counts

Underreporting scalars were modelled as a generalised linear model estimating the proportion of true cases captured by reporting systems: a value of 1 therefore represents all actual cases of leishmaniasis being reported through notification systems. The specific models is as follows:

$$\frac{\text{reported cases}}{\text{"true" cases}} = \text{Pathogen} + \text{Year} + \text{Sociodemographic Index}$$

To account for potential biases inherently present based upon differing survey methods or location-specific confounders, 1,000 models were run, with each model randomly dropping all data from a specific location, and then one additional data point from the remaining dataset. Similarly, for estimates that spanned multiple years, for each model one of the years within the range of possible years was randomly assigned.

To generate scaled case counts, for each of the 1,000 models a random number was generated, using a normal distribution with mean being that of the mean estimated scalar bounded by the upper and lower confidence interval. With these 1,000 scalars, 1,000 scaled case counts were calculated and summarised for modelling within ST-GPR.

### Method – ST-GPR

Using existing IHME tools, the summarised values were modelled using ST-GPR to produce a complete time series of estimates for each location-year tagged “Present” or “Protocol Present”. In short, ST-GPR attempts to model non-linear trends utilising a Gaussian process to fit a trend, rather than a definitive functional form. The following model specifications were used:

$$\text{Incidence} = \text{Health Access and Quality Index} + \text{Sociodemographic Index} + (1|\text{level 1}) + (1|\text{level 2}) + (1|\text{level 3})$$

where levels 1, 2, and 3, referring to GBD location hierarchies, treated as random effects. The following hyperparameters were used: st-lambda = 0.4, st-omega = 1, st-zeta = 0.01, gpr-scale = 10.

### Method – DisMod

DisMod was used to generate an age-sex curve to disaggregate all-age, both-sex incidence data. DisMod is an integrated metaregression framework that allows for multiple datasets to be integrated into a singular analysis regardless of age-binning, sources, and geographies. As a consequence, a variety of differently aggregated information can be evaluated to generate a consensus output. From this model, the global fit was used.

### Method – YLL estimation

Deaths were modelled using a mixed effect model parameterising case-fatality rate, with data derived from taking attributed-death data and dividing it by the mean predicted incident cases.

$$\text{Case Fatality Rate} \sim \text{Age} + \text{Sex} + (\text{Age}|\text{Super Region} / \text{Region}) + (\text{Sex}|\text{Super Region})$$

Only data from countries defined as present or protocol present were used, as these represent locations that are generalisable to all endemic regions for VL. The deaths in non-endemic countries, while not used in the case-fatality rate model, are subsequently added back into the death envelope as-is by central computation.

### Changes from GBD 2016

A number of changes to the methodology were implemented for GBD 2017:

Geographic restrictions – to improve transparency and tractability of geographic restrictions, maps of restricted locations and years are available, with clear designation of data (or assumptions) used to inform a GBD location-year’s status. As a result of updating, the status of some GBD locations

has changed in the light of new evidence (eg, Angola). While we explore how best to host this information, it is currently available upon request to [gbdsec@uw.edu](mailto:gbdsec@uw.edu).

All-age, both-sex incidence envelope – new data were acquired and an ST-GPR methodology implemented consistently across the globe. Relevant covariates were updated from GBD 2016. One important change was the removal of the “High endemicity” covariate, which constrained predictions, particularly in low SDI countries in Africa, since its construction and subsequent use in models are not independent of each other.

Age-sex breakdown – age-sex curves were taken from a DisMod model using an updated dataset of age-sex specific information

Underreporting model – considerable changes were undertaken from GBD 2016 for underreporting. Rather than using a single scalar, taken from expert opinion (Alvar et al. 2012), applied across the entire time series, a model was developed, parameterised by real data, allowing for spatiotemporal variation in estimates. These variable scalars were then applied to their relevant location-year case count values.

### Results specific to visceral leishmaniasis model

The aim here is to provide insights in some of the sub-models that are involved in the VL estimation process that are not published as part of the GBD capstones or readily available via the supplemental materials. For further questions, please direct toward [gbdsec@uw.edu](mailto:gbdsec@uw.edu).

#### Underreporting

##### Coefficients

Pathogen: 0.6371 (-0.0456 – 1.5868) (where pathogen order is CL, VL)

Year: 0.1350 (0.0714 – 0.2058)

SDI: 4.6230 (2.0290 – 9.3287)

## Bihar

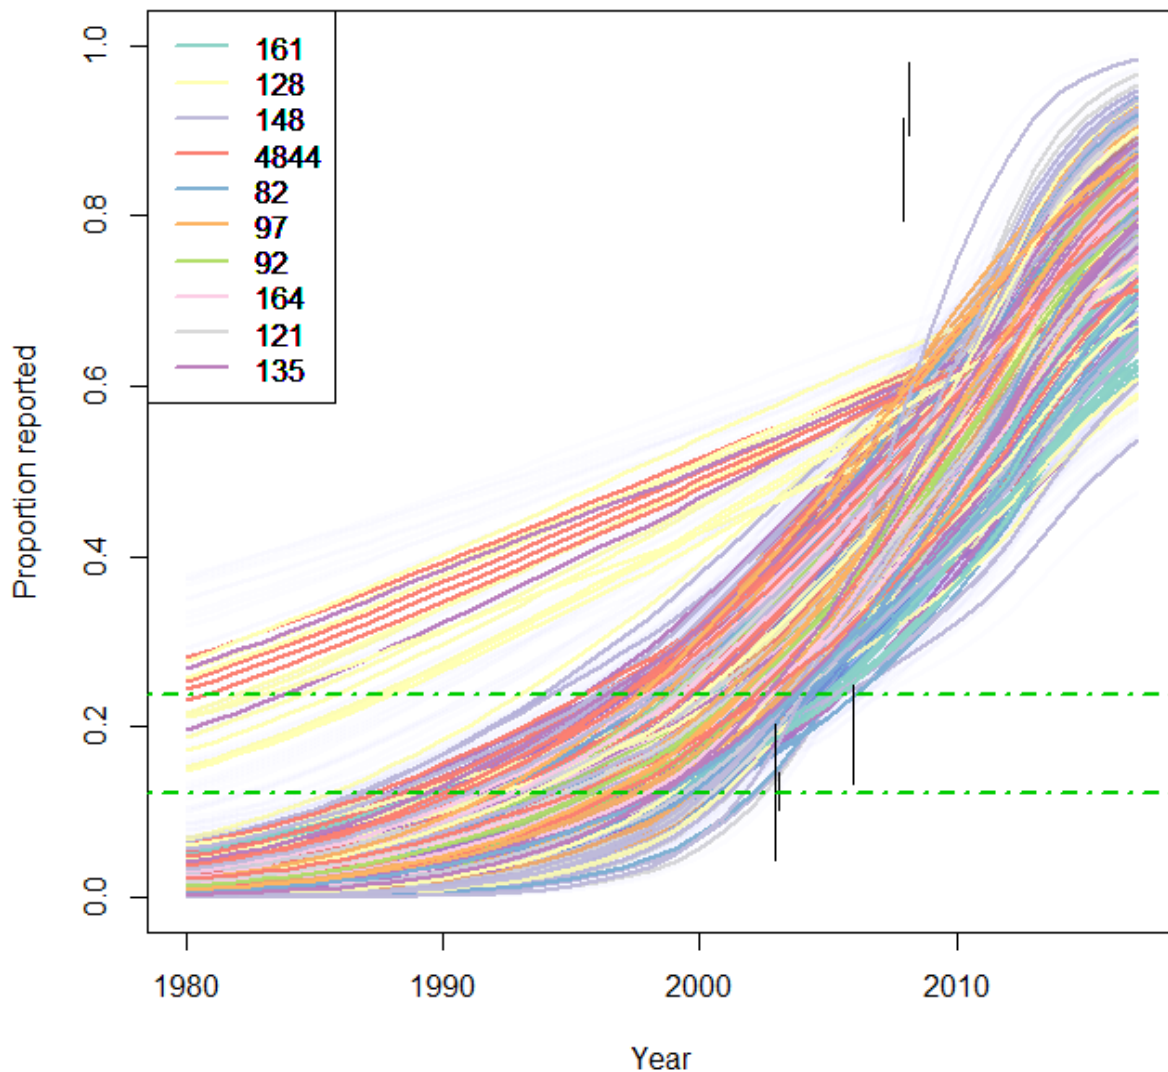

Figure 3: Example of VL underreporting model for Bihar, India. Plot showing each of the 1,000 iterations of the underreporting model ran, coloured by the location that has been held out [colours coded by their GBD location id: 161 = Bangladesh, 128 = Guatemala, 148 = Morocco, 4844 = Bihar, India, 82 = Greece, 97 = Argentina, 92 = Spain, 164 = Nepal, 121 = Bolivia, 135 = Brazil]. The black vertical lines represent data points (with standard errors) for Bihar as listed in Table 1, and the green dashed line is the upper and lower bound of the underreporting factor recorded by Alvar *et al.* (2012), which was applied across all time in GBD 2016.

### Age- and sex-specific trends in incidence rate

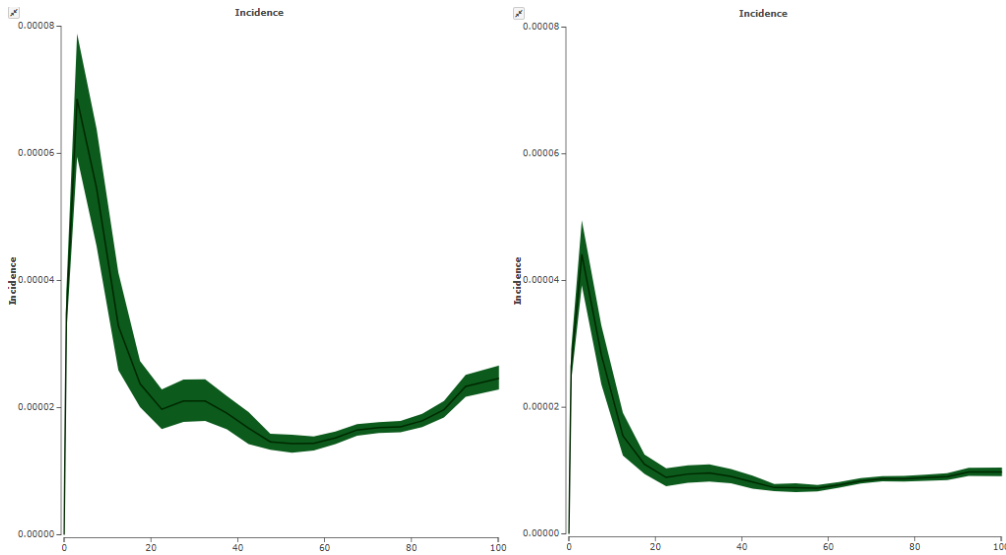

Figure 4: Global age-specific incidence estimates for males (left) and females (right) for the year 2010. Incidence is on the Y axis (rate per total population), and age in years on the X axis. Screenshot from EpiViz.

Figure 4 shows the age-specific variation in incidence rates, differentiated by sex. When considered as a global aggregate, we see that reported male incident rates are approximately double those of females, with highest rates observed in younger age groupings. In adults, levels are comparatively flat, but there is an uptick in older age groups.

### ST-GPR

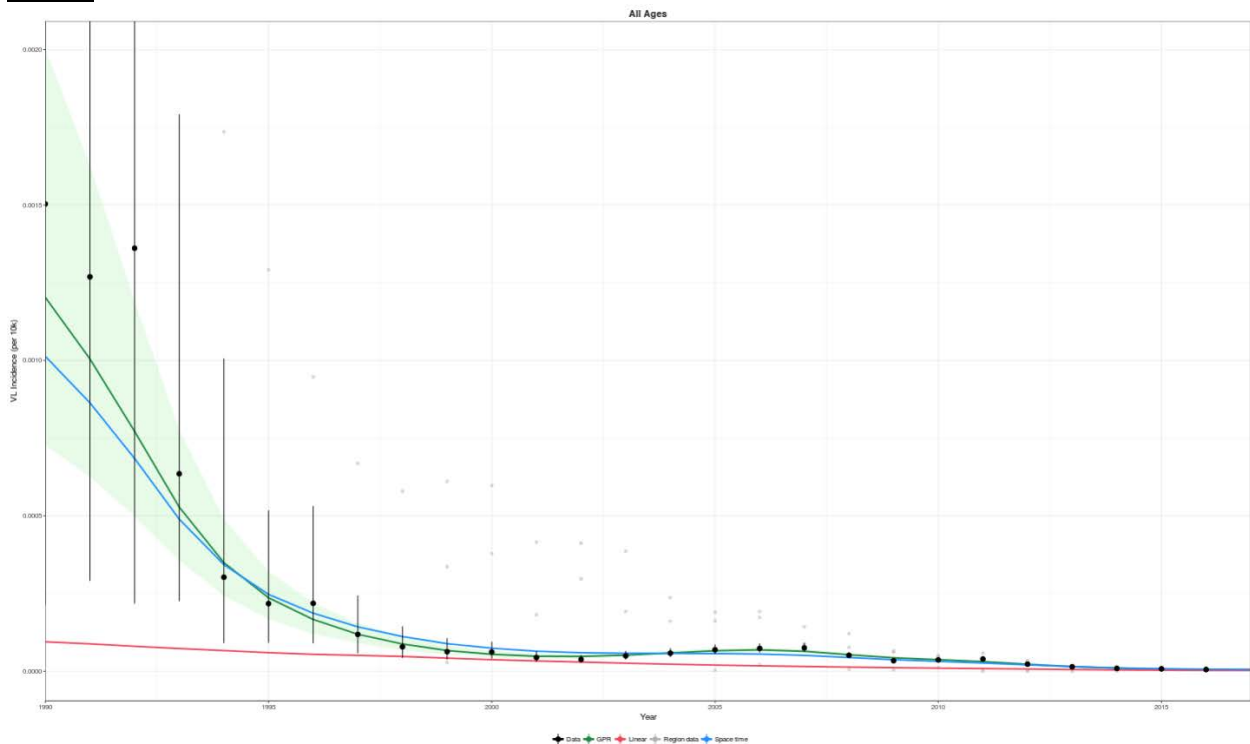

Figure 5: ST-GPR estimates for India (all-age, both sex) for years 1990–2017. Black dots represent input data points (post processing for underreporting) with the black lines indicating variance. The green line

represents the mean GPR estimated value, with uncertainty shown by the green polygon. The blue line indicates the space-time component of the ST-GPR; the red indicates the linear regression component derived off of global data. Transparent black dots represent data from other locations in the GBD region CFR.

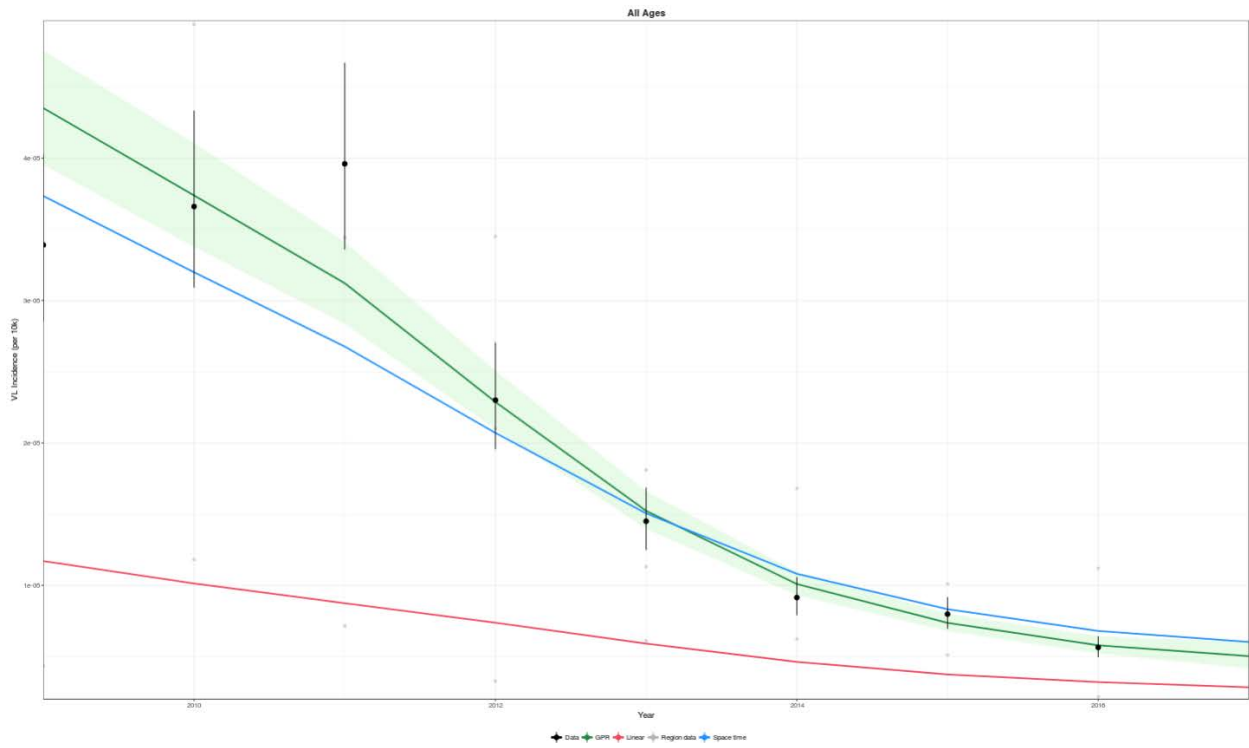

Figure 6: ST-GPR estimates for India (all-age, both sex) for years 2009–2017. Colouration and symbols are as stated in caption for Figure 5.

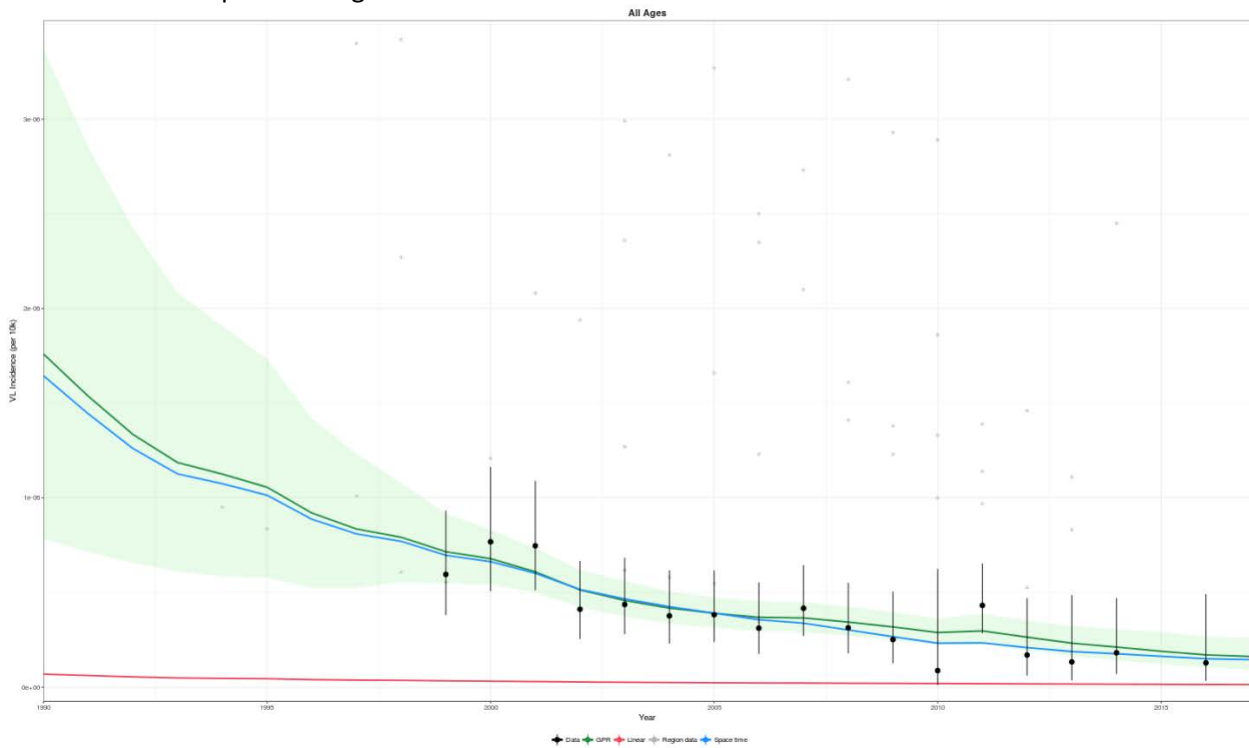

Figure 7: ST-GPR estimates for France (all-age, both sex) for years 1990–2017. Colouration and symbols are as stated in caption for Figure 5.

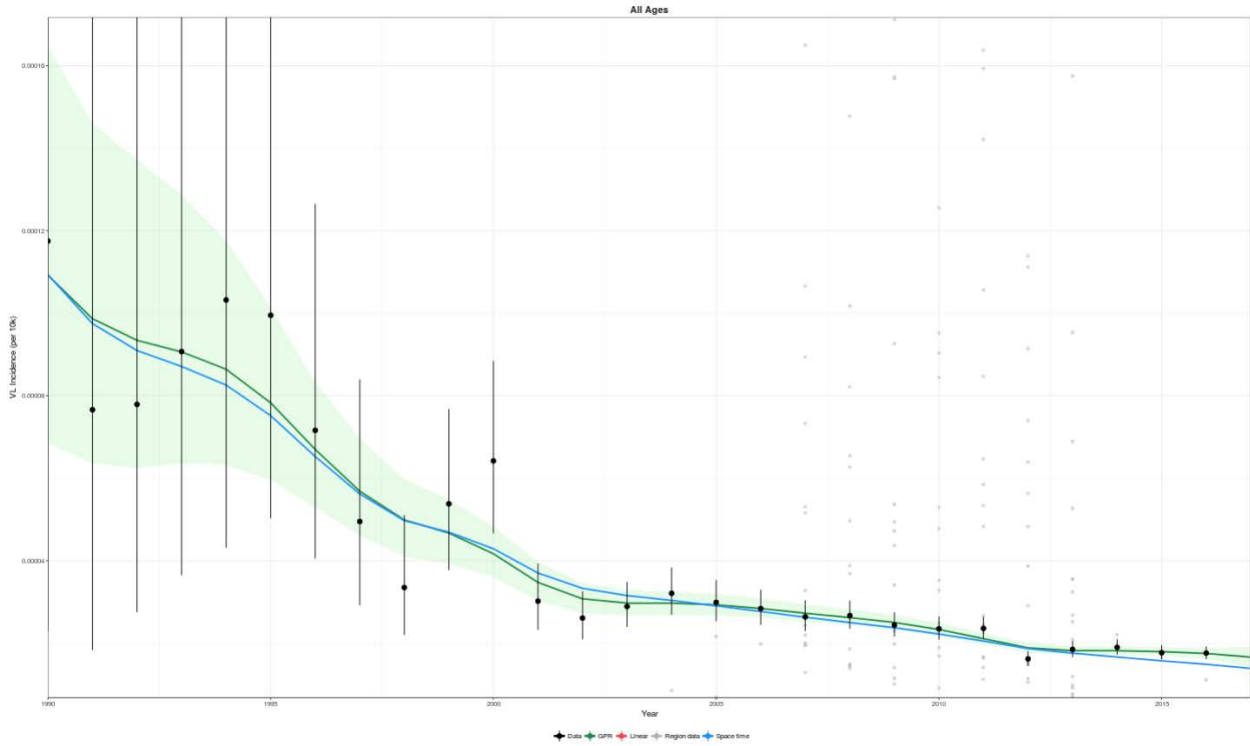

Figure 8: ST-GPR estimates for Brazil (all-age, both sex) for years 1990–2017. Colouration and symbols are as stated in caption for Figure 5.

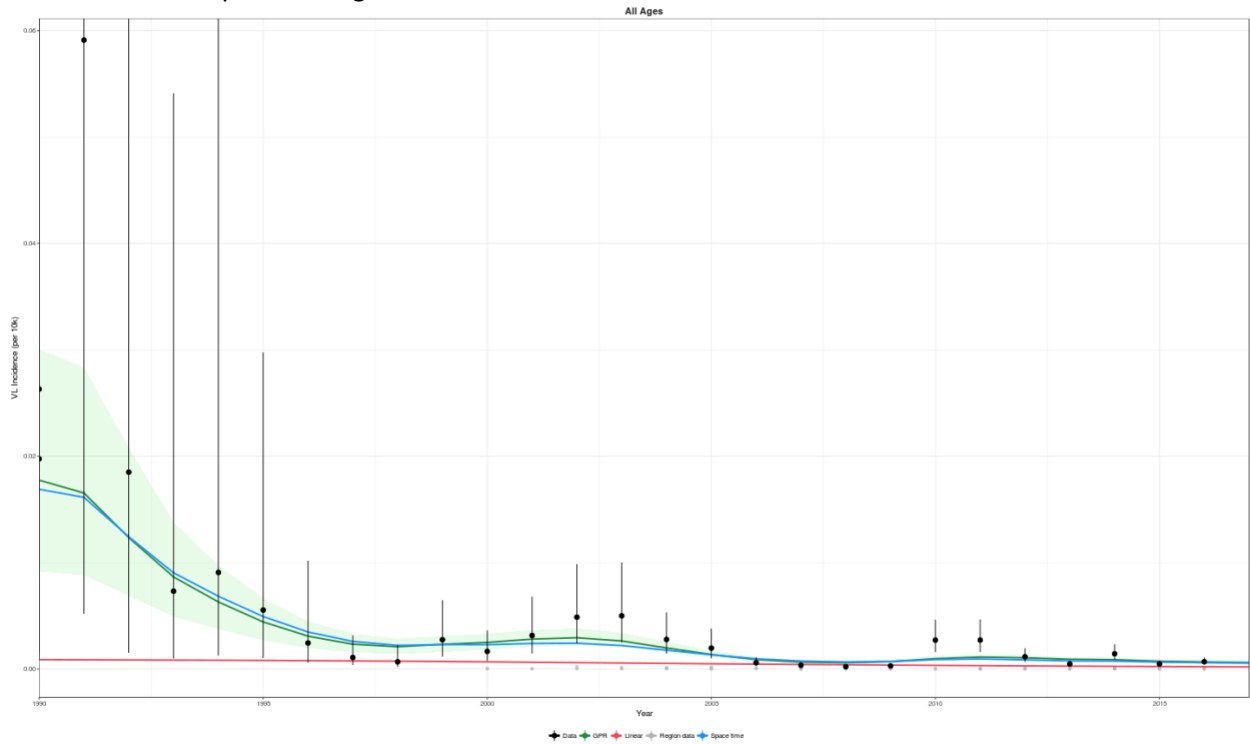

Figure 9: ST-GPR estimates for South Sudan (all-age, both sex) for years 1990–2017. Colouration and symbols are as stated in caption for Figure 5.



### Italy

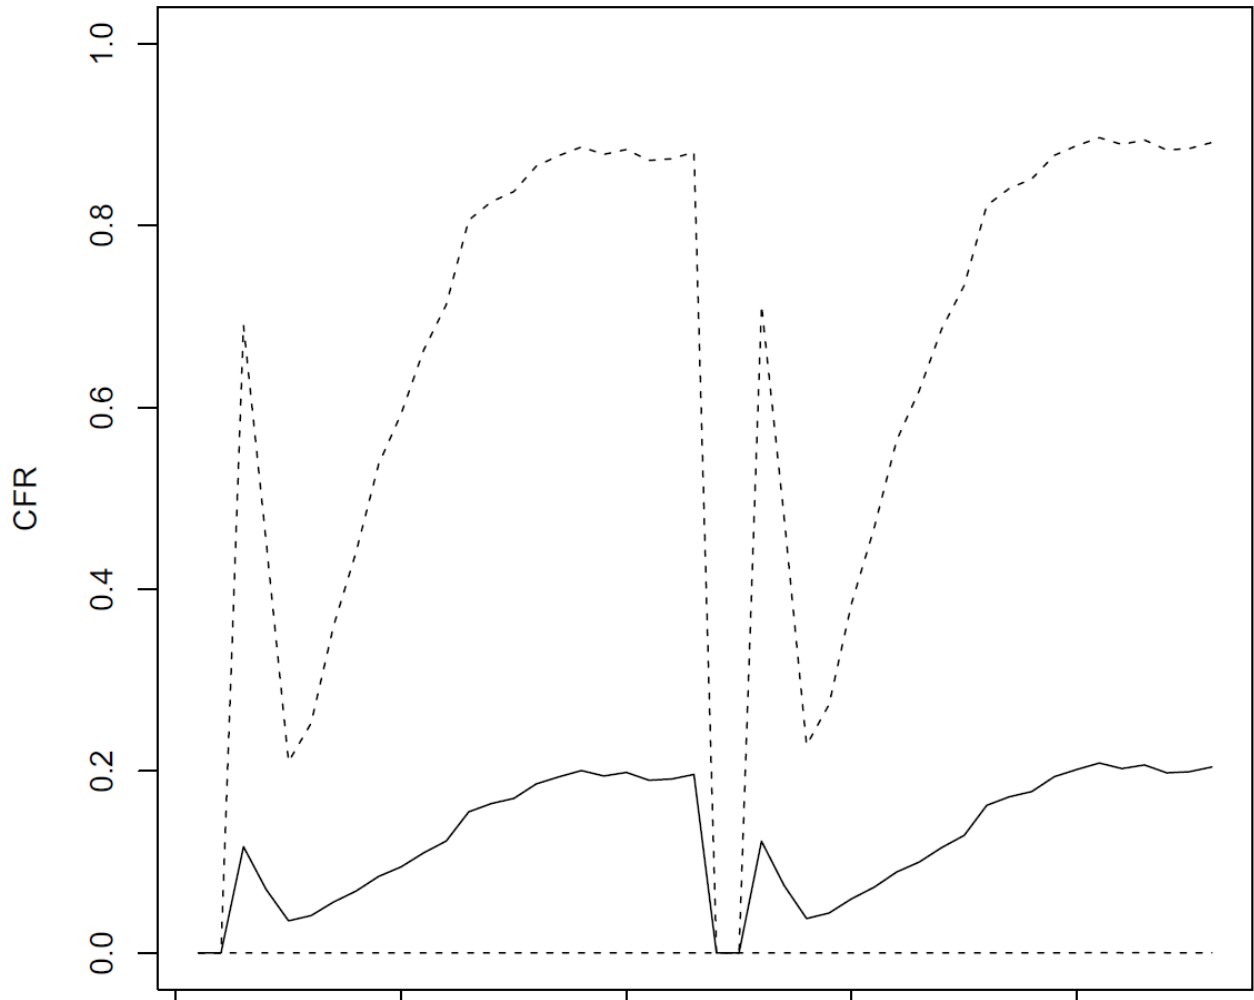

Figure 10: Case fatality rate values for Italy plotted sequentially for GBD age groups, female then male. The solid line represents the mean value of the 1,000 draws; the dashed lines represent the upper and lower bounds (95%).

## South Sudan

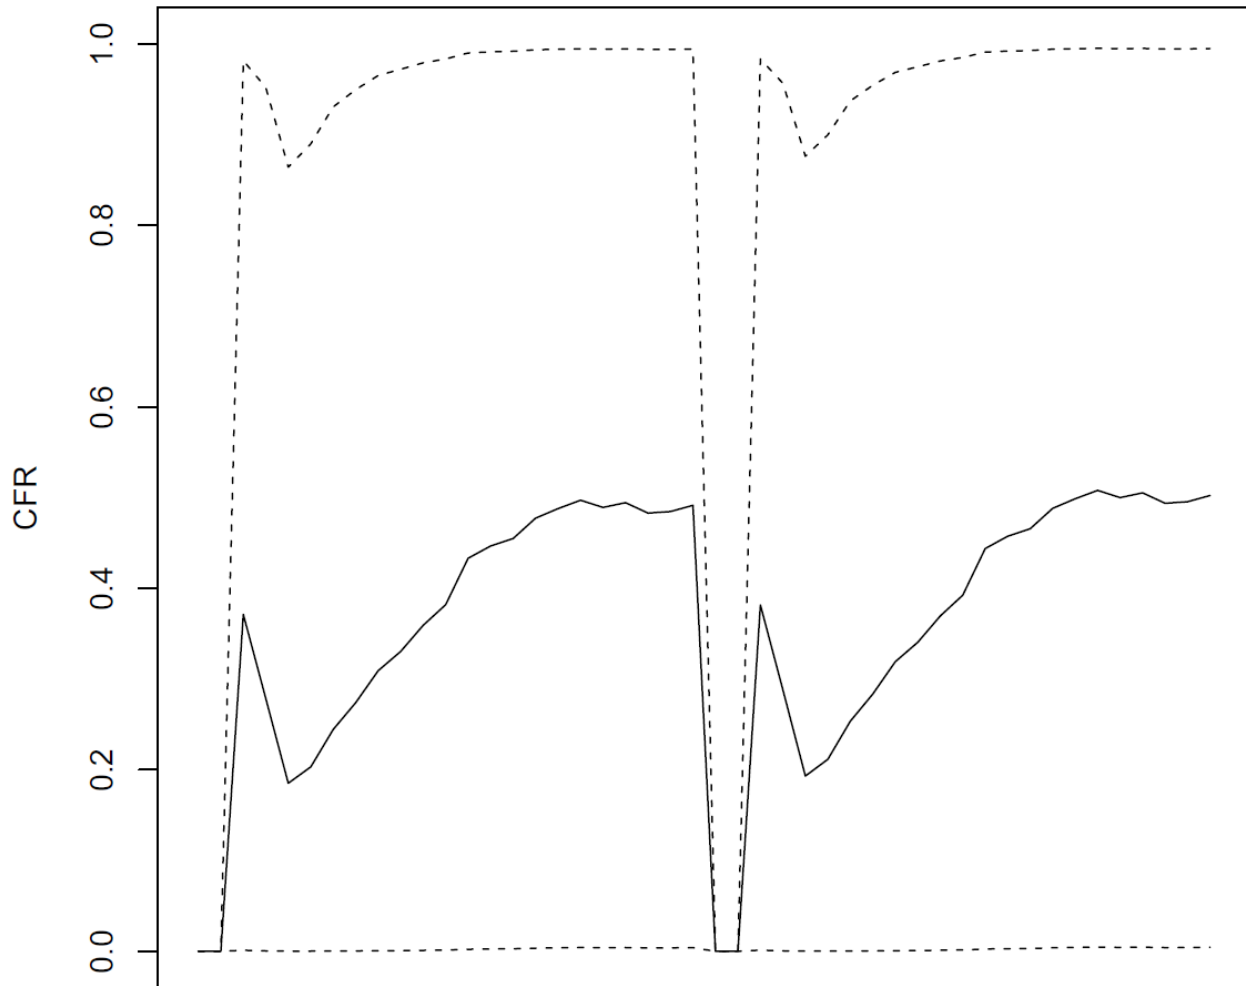

Figure 11: Case fatality rate values for South Sudan plotted sequentially for GBD age groups, male then female. The solid line represents the mean value of the 1,000 draws; the dashed lines represent the upper and lower bounds (95%).

Case fatality rate estimates had high uncertainty in some geographies. In general, female mean case fatality rates were higher than male case fatality rates. Typically an all-age estimate of 10% case-fatality rate is discussed when looking at visceral leishmaniasis (Alvar et al. 2012).

### Limitations

As with any modelling process, a number of limitations are known, which will be the focus of additional effort in upcoming GBD cycles, and engagement with collaborators. Given the focus on location-representative estimates, the existing model is based upon national case counts. This excludes a large resource of published literature and grey literature focused on site-specific surveillance or surveys. While some pathogens have integrated subnational approaches as a building block for national estimates (eg, schistosomiasis) this is yet to be implemented for visceral leishmaniasis. Regardless of contribution to the global incidence model, these data can be used to inform age-sex splits, as well as a

variety of other key parameters, particularly duration parameters, which are currently lacking uncertainty and support from a full literature review.

The removal of the “high endemicity” dataset in the ST-GPR framework led to some sub-Saharan African nations having considerably higher burden estimates than prior cycles. For many nations, this is reflective of the sporadic reporting of cases in these countries (*eg*, in Angola and the Democratic Republic of Congo), and a consensus on pathogen presence is highly uncertain. It was important to remove this covariate, however, as it was a prior imposed on the model, a model designed to evaluate this status that leveraged the same data that was in the model itself. This high degree of dependence we aimed to eliminate. In the next cycle of GBD, there is a need to identify an independent resource to aid in quantifying the population-at-risk, which the high endemicity layer was designed to approximate, as well as engaging with self-identified pathogen-specific and country-specific collaborators to re-evaluate the presence/protocol presence status assigned to these nations.

Similarly, existing death data are limited in geographic distribution (due to primarily coming from countries with robust vital registration systems), and could lack in external validity when extrapolated to other nations. While region-level random effects help account for some of this (for instance, mitigating some of the higher case fatality rates in immunocompromised individuals in the high-income region in GBD), this doesn’t eliminate all possible confounding, and furthermore, does not negate the fact that for most of the high incidence countries do not report a full time series of deaths. Further cycles should explicitly consider the reported case fatality rates in the literature, many of which come from those VR data-poor regions.

Age-sex patterns are highly reflective of the countries from which data is obtained. Importantly, there is a large skew in information coming from Brazil. This information has potential biases due to the nature of the data inputs (notification and hospital data) and the corresponding age-sex variation in health-seeking behaviours. Yet again, consulting some of the detailed household surveys that do exist will increase geographic coverage of these estimates, and provide an important independent comparator to determine whether these disparities are genuine, or an artefact of the reporting systems consulted in this current model.

## **References**

Alvar, Jorge, Iván D Vélez, Caryn Bern, Mercé Herrero, Philippe Desjeux, Jorge Cano, Jean Jannin, and Margriet den Boer. 2012. “Leishmaniasis Worldwide and Global Estimates of Its Incidence.” *PLoS One* 7 (5): e35671.

Copeland, H W, B A Arana, and T R Navin. 1990. “Comparison of Active and Passive Case Detection of Cutaneous Leishmaniasis in Guatemala.” *Am. J. Trop. Med. Hyg.* 43 (3): 257–259.

Das, A K, A D Harries, S G Hinderaker, R Zachariah, B Ahmed, G N Shah, M A Khogali, G I Das, E M Ahmed, and K Ritmeijer. 2014. “Active and Passive Case Detection Strategies for the Control of Leishmaniasis in Bangladesh.” *Public Health Action* 4 (1): 15–21.

Eid, Daniel, Miguel Guzman-Rivero, Ernesto Rojas, Isabel Goicolea, Anna-Karin Hurtig, Daniel Illanes, and Miguel San Sebastian. 2017. “Assessment of a Leishmaniasis Reporting System in Tropical Bolivia Using the Capture-Recapture Method,” October, [tpmd170308](https://doi.org/10.1371/journal.pmd.170308).

Faraj, Chafika, Joshua Yukich, El Bachir Adlaoui, Rachid Wahabi, Abraham Peter Mnzava, Mustapha Kaddaf, Abderrahmane Laamrani El Idrissi, Btissam Ameer, and Immo Kleinschmidt. 2016. “Effectiveness and Cost of Insecticide-Treated Bed Nets and Indoor Residual Spraying for the Control of Cutaneous Leishmaniasis: A Cluster-Randomized Control Trial in Morocco.” *Am. J. Trop. Med. Hyg.* 94 (3): 679–685.

- Gkolfinopoulou, K, N Bitsolas, S Patrinos, L Veneti, A Marka, G Dougas, D Pervanidou, et al. 2013. "Epidemiology of Human Leishmaniasis in Greece, 1981-2011." *Euro Surveill.* 18 (29): 20532.
- Hirve, S, S P Singh, N Kumar, M R Banjara, P Das, S Sundar, S Rijal, et al. 2010. "Effectiveness and Feasibility of Active and Passive Case Detection in the Visceral Leishmaniasis Elimination Initiative in India, Bangladesh, and Nepal." *Am. J. Trop. Med. Hyg.* 83 (3): 507–511.
- Maia-Elkhoury, Ana Nilce Silveira, Eduardo Hage Carmo, Marcia Leite Sousa-Gomes, and Eduardo Mota. 2007. "[Analysis of visceral leishmaniasis reports by the capture-recapture method]." *Rev. Saude Publica* 41 (6): 931–937.
- Pigott, David M, Samir Bhatt, Nick Golding, Kirsten A Duda, Katherine E Battle, Oliver J Brady, Jane P Messina, et al. 2014. "Global Distribution Maps of the Leishmaniasis." *Elife* 3 (January): e02851.
- Rahman, Kazi Mizanur, Indira V M Samarawickrema, David Harley, Anna Olsen, Colin D Butler, Shariful Amin Sumon, Subrata Kumar Biswas, Stephen P Luby, and Adrian C Sleight. 2015. "Performance of Kala-Azar Surveillance in Gaffargaon Subdistrict of Mymensingh, Bangladesh." Edited by Carlos Franco-Paredes. *PLoS Negl. Trop. Dis.* 9 (4): e0003531.
- Sesma, B, and A Barricarte. 1997. "[Leishmaniasis in Navarra: review of activities]." *An. Sist. Sanit. Navar.* 20 (2): 209–216.
- Singh, S P, D C S Reddy, M Rai, and S Sundar. 2006. "Serious Underreporting of Visceral Leishmaniasis through Passive Case Reporting in Bihar, India." *Trop. Med. Int. Health* 11 (6): 899–905.
- Singh, V P, A Ranjan, R K Topno, R B Verma, N A Siddique, V N Ravidas, N Kumar, K Pandey, and P Das. 2010. "Estimation of Under-Reporting of Visceral Leishmaniasis Cases in Bihar, India." *Am. J. Trop. Med. Hyg.* 82 (1): 9–11.
- Yadón, Z E, M A Quigley, C R Davies, L C Rodrigues, and E L Segura. 2001. "Assessment of Leishmaniasis Notification System in Santiago Del Estero, Argentina, 1990-1993." *Am. J. Trop. Med. Hyg.* 65 (1): 27–30.

# Human African Trypanosomiasis (HAT)

## Flowchart

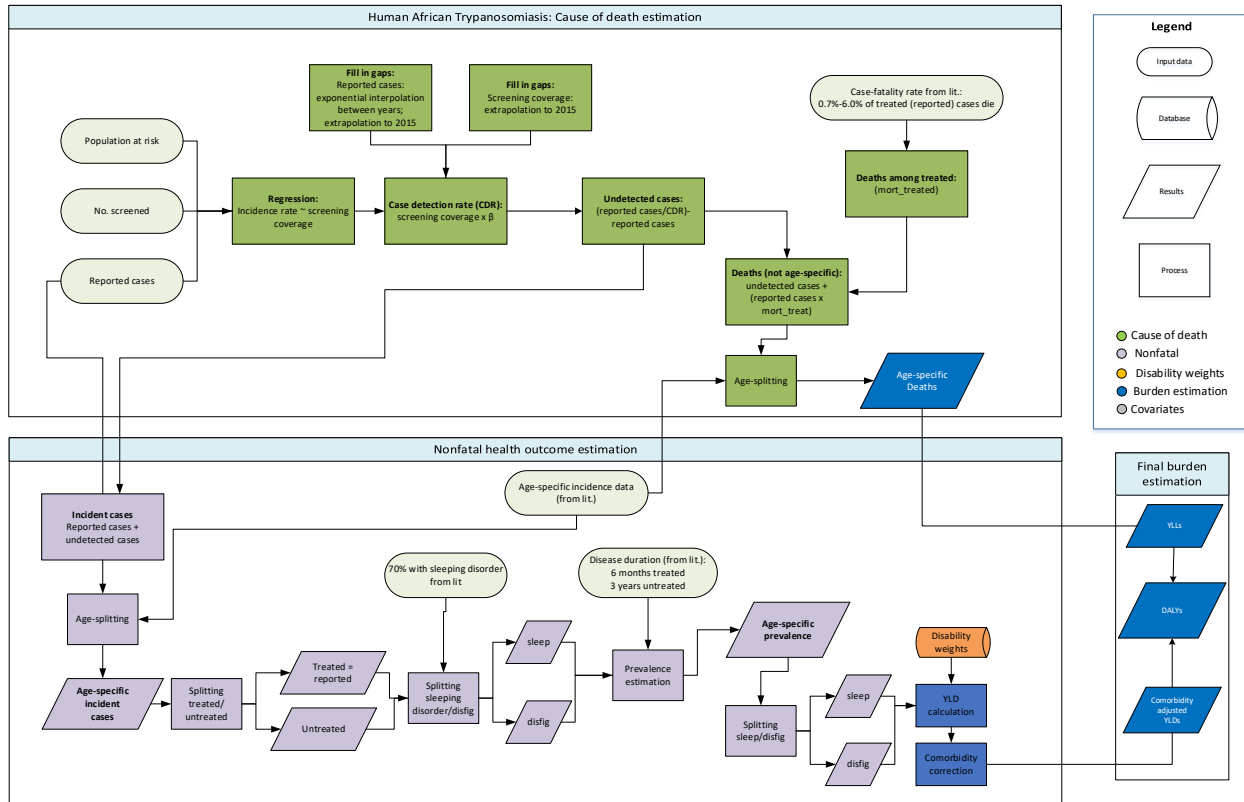

## Input Data & Methodological Summary

### Case Definition

Human African trypanosomiasis (HAT), also known as sleeping sickness, is a vector-borne disease which is transmitted by the bite of the tsetse fly. It is caused by the parasite *Trypanosoma brucei* with two subspecies, namely *T.b. rhodesiense* (makes up less than 5% of total HAT cases) and *T.b. gambiense*. Cases are diagnosed through laboratory methods which rest on finding the parasite in body fluid or tissue by microscopy. In highly endemic or epidemic areas where the likelihood of false positives in serological tests is deemed lower, a seropositive individual is considered affected even in the absence of parasitological confirmation. The ICD-10 codes for HAT are B56.0, B56.1 and B56.9.

### Input data Model inputs

## Data sources for GBD 2017:

- 1) Annual case totals 1980–2016: National-level annual case totals from 1990–2016 were obtained from WHO’s publicly dataset, available here:

<http://apps.who.int/gho/data/node.main.A1635?lang=en>

### Subnational data:

Kenya: Deaths due to HAT were attributed to Busia county. Identification of subnational locations for Kenyan case data were obtained via studies published in the peer-reviewed literature<sup>1</sup> and review of maps published from via the WHO HAT Atlas:

[http://www.who.int/entity/trypanosomiasis\\_african/country/Kenya\\_whole\\_0014.jpg?ua=1](http://www.who.int/entity/trypanosomiasis_african/country/Kenya_whole_0014.jpg?ua=1)

- 2) Age/sex data: Data on the age and sex distribution of HAT cases were extracted from the peer-reviewed literature via a systematic review of sources identified in PubMed using the following search string:

((African trypanosomiasis[Title/Abstract] AND (incidence[Title/Abstract] OR burden[Title/Abstract] OR prevalence[Title/Abstract] OR community[Title/Abstract])) AND (“1990”[Date – Publication] : “2017”[Date – Publication]))

This yielded 219 studies of which only three met the inclusion criteria and were extracted. The inclusion criteria were:

1. Studies representative of the national population
  2. Population-based studies
  3. Studies with primary data on incidence
  4. Studies of human African trypanosomiasis (excluded studies on animal African trypanosomiasis)
- 3) Population at risk estimates 1980-2015: population at risk estimates from GBD 2010 ArcGIS analysis using geocoded case notifications for 2000 to 2009<sup>2</sup> and population Count Grid estimates from Gridded Population of the World 3.
  - 4) Screening coverage: Data on active vs. passive screening coverage were obtained from a Weekly Epidemiological Report<sup>3</sup> identifying the population screened from 1997 to 2004 at the national level.
  - 5) Geographic restrictions: Data file of all GBD locations, defining location as either endemic or non-endemic for HAT. Estimates are not produced for non-endemic countries, nor are they generated for countries with a history of HAT transmission but no data reported by WHO from 1990–2016.

## Modelling strategy

### *Geographic restrictions*

For countries historically considered endemic for HAT, but which have no reported case data or estimate of the population at risk, estimates are not produced. These countries include Botswana, Ethiopia, Guinea-Bissau, and Rwanda.

Among countries where population at-risk data are available, if no cases were reported to WHO, we assume the incidence of HAT is zero for those years and generate model estimates accordingly.

### *Modelling steps*

The cause of death model for HAT is implemented as follows:

1. The incidence of reported HAT cases among the population at-risk was calculated as the total number of reported cases divided by the population at-risk estimates generated by the GBD working group for the period 1980–2015. Population at-risk estimates for 2016–2017 were generated by assuming an annual 2% rate of population growth.
2. To estimate the number of cases that were likely undetected by country and year, a multilevel mixed-effects linear regression of log-transformed incidence rate (ratio of reported HAT cases to population at risk) on log-transformed screening coverage<sup>3</sup> (ratio of number screened for HAT to population at risk), with country random effects, was performed. Gaps were then filled using interpolation between years and extrapolation from 2016 to 2017 for reported cases. This model generates a beta-coefficient which is used to estimate the case detection rate (see step 4).

For country-years in which no screening coverage data were reported:

- Among countries with data reported, 1997–2004, the proportion of the at-risk population screened from 1997 was used retrospectively for the period 1980–1996 and the screening coverage from 2004 was carried forward from 2005 to 2017.
  - For countries with no screening data reported, the mean screening coverage for the region was used to impute a value over time.
3. To construct an estimate of total deaths, we first assume that all detected cases receive treatment, and that mortality among the treated occurs for a small proportion of cases. Deaths among detected cases are estimated by generating 1,000 draws of mortality among treated cases, assuming that between 0.7% and 6.0% of all reported (and therefore assumed to have received treatment) cases die.<sup>4-6</sup>
  4. We then assume that all undetected cases experience mortality. This is estimated via generation of 1,000 draws of the case detection rate (CDR), given the expected screening coverage from the regression (in Step 2). Undetected deaths were then estimated as the difference between the ratio of reported cases to CDR and reported cases (reported cases/CDR – reported cases).
  5. Estimates of death were obtained by adding the deaths among treated cases to the total number of undetected cases. Without information on sex-specific incidence or deaths, death rates between both sexes were equal.

6. Finally, an age-pattern was applied to the mortality estimates using the incidence studies from Sudan<sup>7</sup>, DRC<sup>8</sup>, and Uganda<sup>9</sup>. The age-pattern in GBD 2017 employed a cubic spline to account for the higher risk of infection among working age adults.

## References

1. Rutto JJ, Osano O, Thurania EG, Kurgat RK, Odenyo VA. Socio-economic and cultural determinants of human African trypanosomiasis at the Kenya - Uganda transboundary. *PLoS Negl Trop Dis* 2013; **7**(4): e2186.
2. Simarro PP, Cecchi G, Paone M, et al. The Atlas of human African trypanosomiasis: a contribution to global mapping of neglected tropical diseases. *Int J Health Geogr* 2010; **9**: 57.
3. World Health O. Human African trypanosomiasis (sleeping sickness): epidemiological update. *Weekly epidemiological record* 2006; **February 24**(8): 69-80.
4. Kato CD, Nanteza A, Mugasa C, Edyelu A, Matovu E, Alibu VP. Clinical profiles, disease outcome and co-morbidities among T. b. rhodesiense sleeping sickness patients in Uganda. *PLoS One* 2015; **10**(2): e0118370.
5. Balasegaram M, Harris S, Checchi F, Hamel C, Karunakara U. Treatment outcomes and risk factors for relapse in patients with early-stage human African trypanosomiasis (HAT) in the Republic of the Congo. *Bull World Health Organ* 2006; **84**(10): 777-82.
6. Odiit M, Kansiime F, Enyaru JC. Duration of symptoms and case fatality of sleeping sickness caused by *Trypanosoma brucei rhodesiense* in Tororo, Uganda. *East Afr Med J* 1997; **74**(12): 792-5.
7. Moore A, Richer M, Enrile M, Losio E, Roberts J, Levy D. Resurgence of sleeping sickness in Tambura County, Sudan. *Am J Trop Med Hyg* 1999; **61**(2): 315-8.
8. Lutumba P, Makieya E, Shaw A, Meheus F, Boelaert M. Human African trypanosomiasis in a rural community, Democratic Republic of Congo. *Emerg Infect Dis* 2007; **13**(2): 248-54.
9. Fevre EM, Odiit M, Coleman PG, Woolhouse ME, Welburn SC. Estimating the burden of rhodesiense sleeping sickness during an outbreak in Serere, eastern Uganda. *BMC Public Health* 2008; **8**: 96.



## Schistosomiasis

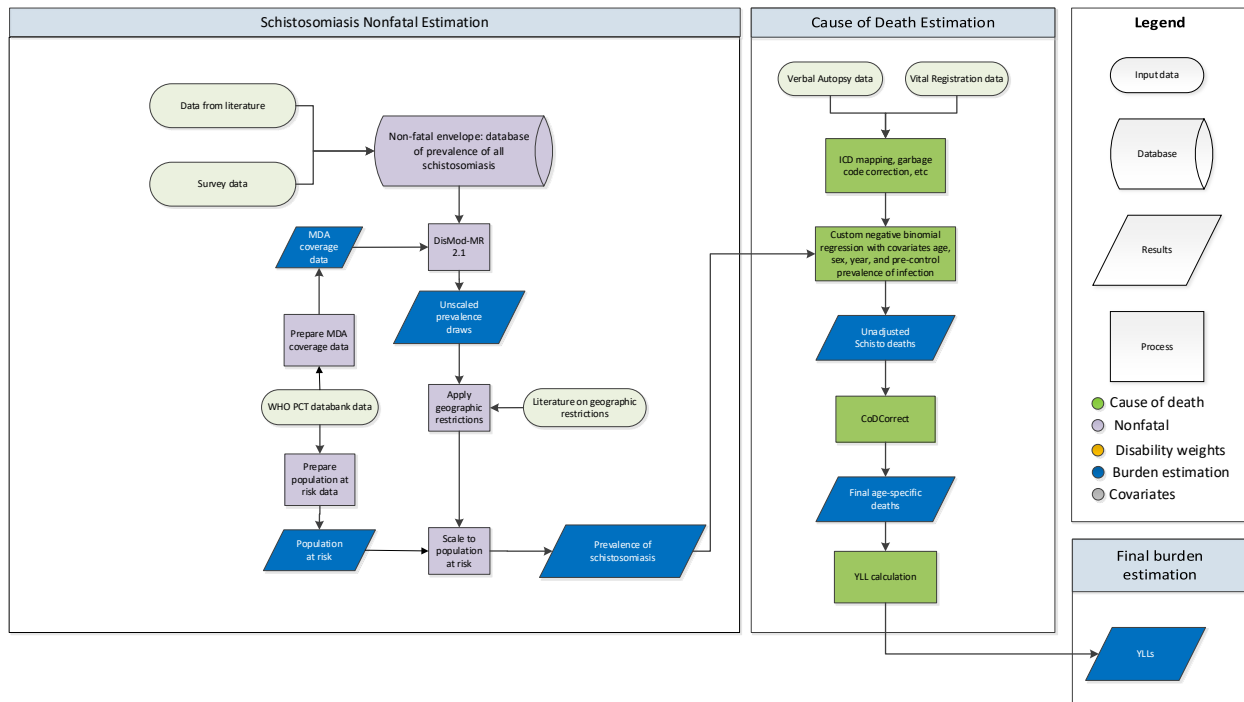

### Input data

To estimate mortality due to schistosomiasis, data on deaths and prevalence of infection were used. The prevalence data were prepared this year for GBD 2017, and further information on prevalence data is available in the nonfatal write-up for this cause. Country-year-age-sex-specific verbal autopsy and vital registration data were used in the mortality model.

### Geographic restrictions

We conducted a literature review to determine the geographic extent of the disease and classify locations based on whether the disease is absent or present in each year. Locations that were geographically restricted in any given year did not have estimates made for them but could have imported cases attributed to them at a later stage. Of note, we did not attempt a complete systematic review, since a single high-quality source could offer sufficient evidence of presence. Evidence of absence or presence was not available for every location for each year and so assumptions were made for missing years by taking into consideration the epidemiological characteristics of the disease. If evidence indicated disease presence for two non-consecutive years, we assumed presence for all years between the two. If evidence indicated disease absence for two non-consecutive years, we assumed absence for all years between the two. If evidence indicated a change in status (ie, from absent to present, or present to absent) between two non-consecutive years, then we conducted targeted searches to ascertain the relevant year of introduction or elimination for that location. In the cases where presence or absence information was missing for the start or end years of our study interval (1990–2017) without evidence of any introduction or elimination events within the interval, we applied the status of the first and last presence/absence observations respectively to all years between the

interval bound and the observation year. For schistosomiasis, we used a combination of Chitsulo et al's *The global status of schistosomiasis and its control* (1) and WHO's *Preventative chemotherapy in human helminthiasis* (2) report as a baseline. Where country-level endemicity statuses conflicted between the two sources, we searched Pubmed and Google Scholar for country- and subnational-specific endemicity status. Our search yielded 22 sources that were used to develop our annual geographic restriction map for schistosomiasis.

### Modelling strategy

To estimate deaths due to schistosomiasis, a negative binomial regression model of country-year-age-sex-specific deaths on natural log-transformed prevalence of total schistosomiasis infection with a 15-year lag was used. The negative binomial regression was selected due to its suitability for modelling count data. In addition, there are relatively low number of deaths attributable to schistosomiasis. Covariates for endemic Brazil subnationals and South Africa subnationals were used to allow the model to follow data in those areas. A multivariate normal distribution using the mean and variance-covariance matrix from the model was used to generate 1,000 draws of deaths due to schistosomiasis.

Models were evaluated by assessing the AIC and plotting the predicted deaths against time, age, and sex. In addition, the Cause of Death visualisation tool was used to evaluate time trends across locations, age, and sex. A map of the global distribution of schistosomiasis across age groups was also used to assess the changes in death rates over time. The final model was selected based on how well the estimated numbers fit the input data and how plausible the predicted distribution of disease was over time and with age.

### References

- (1) Chitsulo, L., Engels, D., Montresor, A., & Savioli, L. (2000). The global status of schistosomiasis and its control. *Acta Tropica*, 77(1), 41-51. doi:10.1016/s0001-706x(00)00122-4
- (2) World Health Organization (2006). *Preventive chemotherapy in human helminthiasis: coordinated use of anthelmintic drugs in control interventions : a manual for health professionals and programme managers.*

## Cysticercosis

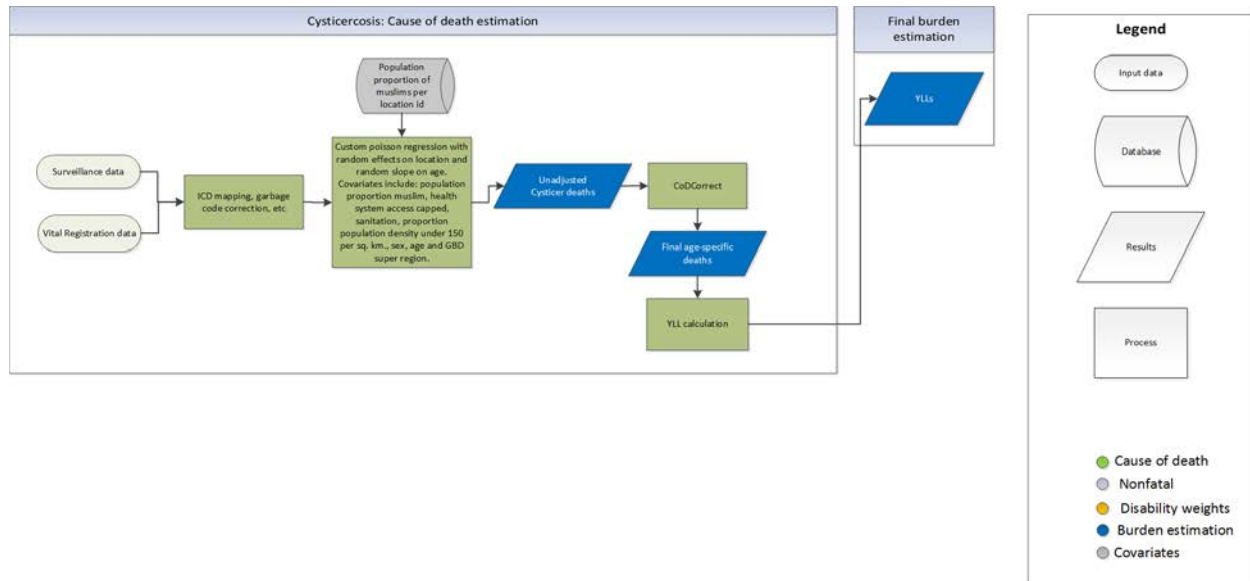

### Input data

The model for mortality due to cysticercosis relied on vital registration and surveillance data from endemic countries. In addition, we used data from the Pew Research Center on percentage of population that is Muslim by country. The primary covariates adjusted for in the model were proportion of the population that is Muslim, health system access capped, proportion of the population with access to sanitation, proportion of the country with population density under 150 people per square kilometer, sex, age, and GBD super-region.

### Geographic restrictions

We conducted a literature review to determine the geographic extent of the disease and classify locations based on whether the disease is absent or present in each year. Locations that were geographically restricted in any given year did not have estimates made for them but could have imported cases attributed to them at a later stage. Of note, we did not attempt a complete systematic review, since a single high-quality source could offer sufficient evidence of presence. Evidence of absence or presence was not available for every location for each year, and so assumptions were made for missing years by taking into consideration the epidemiological characteristics of the disease. If evidence indicated disease presence for two non-consecutive years, we assumed presence for all years between the two. If evidence indicated disease absence for two non-consecutive years, we assumed absence for all years between the two. If evidence indicated a change in status (ie, from absent to present, or present to absent) between two non-consecutive years than we conducted targeted searches to ascertain the relevant year of introduction or elimination for that location. In the cases where presence or absence information was missing for the start or end years of our study interval (1990–2016) without evidence of any introduction or elimination events within the interval, we applied the status of the first and last presence/absence observations respectively to all years between the interval bound and the observation year. For cysticercosis, we performed targeted searches to classify

location-years in PubMed and Google Scholar. Our map was populated by 21 peer-reviewed articles and meta-analyses and WHO reports.

### **Modelling strategy**

Globally, deaths due to cysticercosis are relatively low. Therefore, a Poisson model was used to model cysticercosis deaths due to its suitability for count data. This model choice was validated by tests for overdispersion. Random effects were used on location with random slopes on age by location. A multivariate normal distribution using the mean and variance-covariance matrix from the model was used to generate 1,000 draws of deaths due to cysticercosis.

Estimates for new subnational locations were also added in GBD 2016. Since the Pew Research Center only has data on proportion of Muslims by country, we applied the national proportions to subnational locations. We understand that this does not account for sometimes large expected differences in proportions of Muslims within a country but were limited by data availability.

## Cystic Echinococcosis

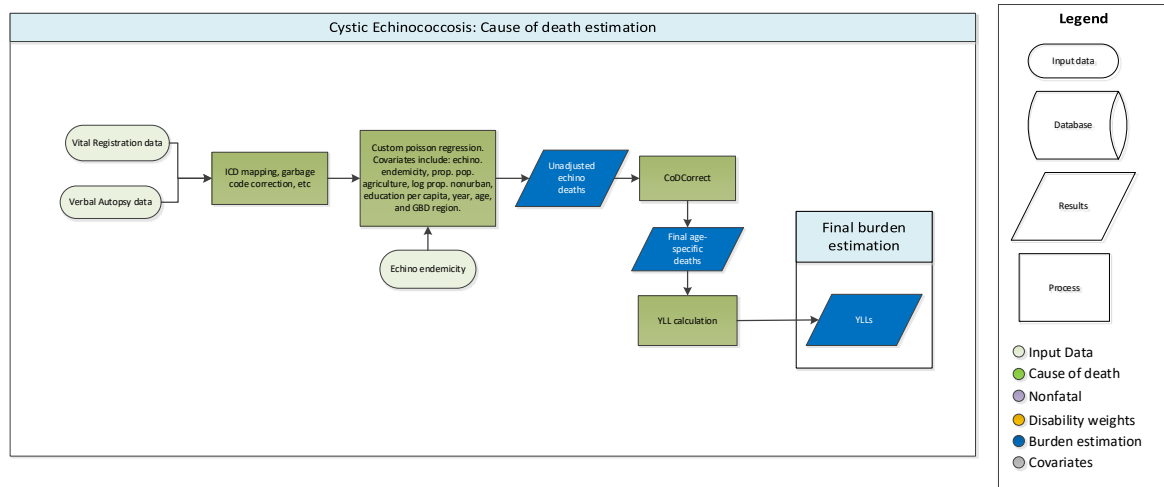

### Input Data

#### *Geographic restrictions*

We conducted a literature review to determine the geographic extent of the disease and classify locations based on whether the disease is absent or present in each year. Locations that were geographically restricted in any given year did not have estimates made for them but could have imported cases attributed to them at a later stage. Of note, we did not attempt a complete systematic review, since a single high-quality source could offer sufficient evidence of presence. Evidence of absence or presence was not available for every location for each year, and so assumptions were made for missing years by taking into consideration the epidemiological characteristics of the disease. If evidence indicated disease presence at a given point in time, we assumed presence for all years. If evidence indicated disease absence, we assumed absence for all years. If evidence indicated a change in status (ie, from absent to present, or present to absent) between two non-consecutive years than we conducted targeted searches to ascertain the relevant year of introduction or elimination for that location. In the cases where presence or absence information was missing from the start or end years of our study interval (1990–2017) without evidence of any introduction or elimination events within the interval, we applied the status of the first and last presence/absence observations respectively to all years between the interval bound and the observation year. For cystic echinococcosis, we reviewed all references pertaining to CE in Global Distribution of Alveolar and Cystic Echinococcosis by Deplazes et al. and supplemented with targeted searches to classify location-years in PubMed and the GHDx. Below is a map of geographic restrictions for the year 2009 as an example.

Figure 1: Geographic restrictions for 2009

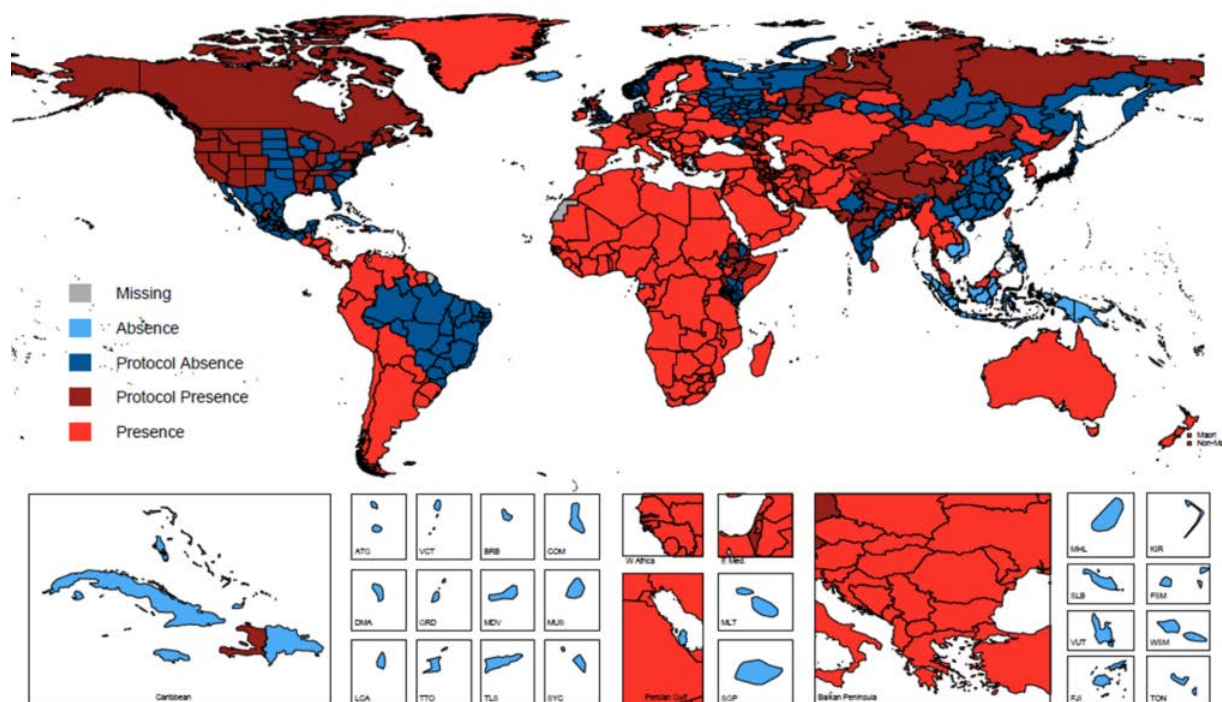

*Data sources*

Mortality due to cystic echinococcosis was modelled using vital registration data and covariates. The Mortality and Cause of Death team provided country-year-age-sex-specific vital registration. Of note, the ICD codes mapped to cystic echinococcosis are:

Table 1: ICD-9 codes mapped to CE

| ICD Code     | ICD Name                                              |
|--------------|-------------------------------------------------------|
| <b>122</b>   | Echinococcosis                                        |
| <b>122.0</b> | <i>Echinococcus granulosus</i> infection of liver     |
| <b>122.1</b> | <i>Echinococcus granulosus</i> infection of lung      |
| <b>122.2</b> | <i>Echinococcus granulosus</i> infection of thyroid   |
| <b>122.3</b> | <i>Echinococcus granulosus</i> infection, other       |
| <b>122.4</b> | <i>Echinococcus granulosus</i> infection, unspecified |
| <b>122.8</b> | Echinococcosis unspecified, of liver                  |
| <b>122.9</b> | Echinococcosis other and unspecified                  |

Table 2: ICD-10 codes mapped to CE

| ICD Code      | ICD Name                                                           |
|---------------|--------------------------------------------------------------------|
| <b>B67.0</b>  | <i>Echinococcus granulosus</i> infection of liver                  |
| <b>B67.1</b>  | <i>Echinococcus granulosus</i> infection of lung                   |
| <b>B67.2</b>  | <i>Echinococcus granulosus</i> infection of bone                   |
| <b>B67.3</b>  | <i>Echinococcus granulosus</i> infection, other and multiple sites |
| <b>B67.31</b> | <i>Echinococcus granulosus</i> infection, thyroid gland            |
| <b>B67.32</b> | <i>Echinococcus granulosus</i> infection, multiple sites           |

|               |                                                       |
|---------------|-------------------------------------------------------|
| <b>B67.39</b> | <i>Echinococcus granulosus</i> infection, other sites |
| <b>B67.4</b>  | <i>Echinococcus granulosus</i> infection, unspecified |
| <b>B67.8</b>  | Echinococcosis, unspecified, of liver                 |
| <b>B67.9</b>  | Echinococcosis, other and unspecified                 |
| <b>B67.90</b> | Echinococcosis, unspecified                           |
| <b>B67.99</b> | Other echinococcosis                                  |

Due to the scarcity of hospital data, especially in endemic areas we incorporated covariates to drive global distribution of deaths in the model.

We created a categorical cystic echinococcosis endemicity covariate based on expert opinion and an endemicity map published by WHO [1]. We assigned GBD locations to one of four categories: probable absence, rare and/or sporadic transmission, suspected and/or confirmed transmission, and high endemic areas.

We based further selection of covariates on a meta-analysis of potential risk factors associated with cystic echinococcosis [2]. According to the meta-analysis, statistically significant potential risk factors include living in rural endemic areas, slaughtering, feeding dogs with viscera, and low income. Hence, we also included two other covariates: the proportion of the population participating in agricultural activities and the log of proportion non-urban.

### Modelling strategy

We implemented a Poisson regression model to estimate deaths due to cystic echinococcosis. The Poisson regression was selected due to its suitability for modelling count data that are not over-dispersed. Since there is a relatively low number of deaths attributable to cystic echinococcosis, a Cause of Death Ensemble Model, which currently does not support count space models, could not be implemented. Covariates for the model, including echinococcosis endemicity, log of proportion non-urban, proportion of the population participating in agricultural activities, and education (years per capita), were incorporated into the model to influence the global trend due to paucity of data. Random effects were used on location with random slopes on age by location. A multivariate normal distribution using the mean and variance-covariance matrix from the model was used to generate 1,000 draws of deaths due to cystic echinococcosis. The final model was selected based on how well the estimated numbers fit the input data and how plausible the predicted distribution of disease was over time and with age.

### References

1. World Health Organization (2010). Global Echinococcosis Granulosus and Cystic Echinococcosis (hydatisosis) Worldwide 2009.
2. Possenti A, Manzano-Román R, Sánchez-Ovejero C, et al. Potential Risk Factors Associated with Human Cystic Echinococcosis: Systematic Review and Meta-analysis. Flisser A, ed. *PLoS Neglected Tropical Diseases*. 2016;10(11):e0005114. doi:10.1371/journal.pntd.0005114.

# Dengue

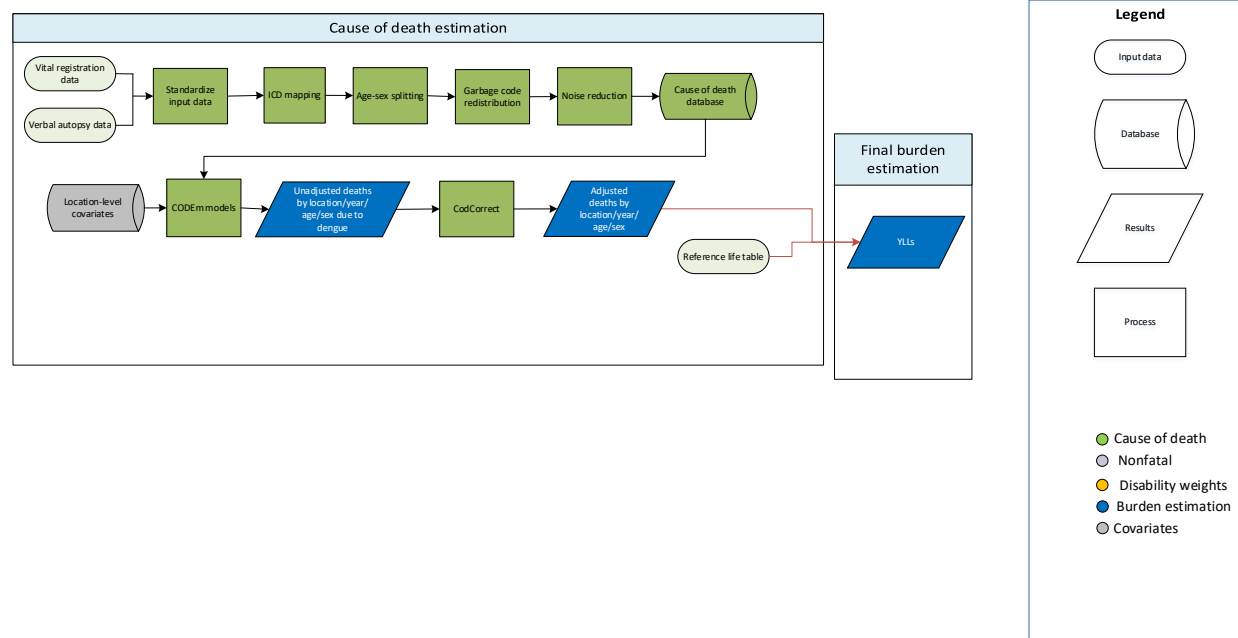

## Input data

We modelled dengue mortality using all available data in the cause of death database. Data points were outliered if they reported an improbably low number of dengue deaths (eg, zero dengue deaths in a hyper-endemic country) or an improbably high number of dengue deaths.

## Modelling strategy

We modelled dengue mortality using three-model hybrid approach: 1) a global CODEm model of all locations, using all data in the CoD database; 2) a CODEm model restricted to data-rich countries; and 3) estimates of mortality from imported cases in non-endemic, data-rich countries. Where dengue deaths were reported in non-endemic data-rich countries, we produced non-zero estimates by drawing from a beta distribution based on number of reported deaths and the underlying sample size. Estimates of dengue mortality in endemic data-rich countries were drawn from the data-rich CODEm model. Finally, estimates in other endemic countries were drawn from the global CODEm model.

We use county-level covariates to inform our model. The *Level* is the associated strength of relationship between the covariate and LRI mortality, ranked from 1 (proximally related) to 3 (distally related). The *direction* is the forced direction of the association between the covariate and dengue mortality

| Level | Covariate                                              | Direction |
|-------|--------------------------------------------------------|-----------|
| 1     | Population density (over 1000 ppl/sqkm, proportion)    | +         |
|       | Population weighted probability of dengue transmission | +         |
| 2     | Health system access                                   | -         |
|       | Latitude under 15 (proportion)                         | +         |
|       | Elevation under 100m (proportion)                      | +         |



|   |                                  |   |
|---|----------------------------------|---|
|   | Rainfall quintile 4 (proportion) | + |
|   | Rainfall quintile 5 (proportion) | + |
|   | Dengue outbreaks (binary)        | + |
| 3 | Education (years per capita)     | - |
|   | LDI (1\$ per capita)             | - |

While we've made no substantive changes to the modelling strategy in 2017, we have updated the geographic restrictions that determine whether a location is considered non-endemic (and, therefore, will have estimates based on the imported case model) in a given year. As for GBD 2016, we derived our geographic restrictions for 2010 from Brady and colleagues(1). We have also refreshed our literature review to determine locations and years in which dengue was introduced or eliminated, to allow for time-varying geographic restrictions.

## References

1. Brady OJ, Gething PW, Bhatt S, Messina JP, Brownstein JS, Hoen AG, et al. Refining the Global Spatial Limits of Dengue Virus Transmission by Evidence-Based Consensus. *PLoS Negl Trop Dis*. 2012 Aug 7;6(8):e1760.
2. Al ST et. Autochthonous Dengue Fever, Tokyo, Japan, 2014 - Volume 21, Number 3—March 2015 - *Emerging Infectious Disease journal - CDC*. [cited 2017 Apr 28]; Available from: [https://wwwnc.cdc.gov/eid/article/21/3/14-1662\\_article](https://wwwnc.cdc.gov/eid/article/21/3/14-1662_article)
3. Guzman MG, Kouri G. Dengue and dengue hemorrhagic fever in the Americas: lessons and challenges. *J Clin Virol*. 2003 May;27(1):1–13.
4. Boshell J, Groot H, Gacharna M, Márquez G, González M, Gaitán MO, et al. Dengue en Colombia. *Biomédica*. 1986;6(3–4):101–6.
5. Effler PV, Pang L, Kitsutani P, Vorndam V, Nakata M, Ayers T, et al. Dengue Fever, Hawaii, 2001–2002. *Emerg Infect Dis*. 2005 May;11(5):742–9.
6. McBride WJH. Dengue fever: is it endemic in Australia? *Intern Med J*. 2010 Apr 1;40(4):247–9.
7. Kay BH, Barker-Hudson P, Stallman ND, Wiemers MA, Marks EN, Holt PJ, et al. Dengue fever. Reappearance in northern Queensland after 26 years. *Med J Aust*. 1984 Mar 3;140(5):264–8.
8. Al GA et. Dengue Reemergence in Argentina - Volume 5, Number 4—August 1999 - *Emerging Infectious Disease journal - CDC*. [cited 2017 Apr 28]; Available from: [https://wwwnc.cdc.gov/eid/article/5/4/99-0424\\_article](https://wwwnc.cdc.gov/eid/article/5/4/99-0424_article)
9. Ramos MM, Mohammed H, Zielinski-Gutierrez E, Hayden MH, Lopez JLR, Fournier M, et al. Epidemic Dengue and Dengue Hemorrhagic Fever at the Texas–Mexico Border: Results of a Household-based Seroepidemiologic Survey, December 2005. *Am J Trop Med Hyg*. 2008 Mar 1;78(3):364–9.
10. Luo L, Liang H, Hu Y, Liu W, Wang Y, Jing Q, et al. Epidemiological, virological, and entomological characteristics of dengue from 1978 to 2009 in Guangzhou, China. *J Vector Ecol*. 2012 Jun 1;37(1):230–40.

11. Murray KO, Rodriguez LF, Herrington E, Kharat V, Vasilakis N, Walker C, et al. Identification of Dengue Fever Cases in Houston, Texas, with Evidence of Autochthonous Transmission Between 2003 and 2005. *Vector Borne Zoonotic Dis.* 2013 Dec 1;13(12):835–45.
12. Locally Acquired Dengue --- Key West, Florida, 2009--2010 [Internet]. [cited 2017 Apr 28]. Available from: <https://www.cdc.gov/mmwr/preview/mmwrhtml/mm5919a1.htm>
13. Bouri N, Sell TK, Franco C, Adalja AA, Henderson DA, Hynes NA. Return of Epidemic Dengue in the United States: Implications for the Public Health Practitioner. *Public Health Rep.* 2012;127(3):259–66.
14. Wilder-Smith A, Quam M, Sessions O, Rocklov J, Liu-Helmersson J, Franco L, et al. The 2012 dengue outbreak in Madeira: exploring the origins. 2014 [cited 2017 Apr 28]; Available from: <https://dr.ntu.edu.sg/handle/10220/19685>
15. Brathwaite Dick O, San Martín JL, Montoya RH, del Diego J, Zambrano B, Dayan GH. The History of Dengue Outbreaks in the Americas. *Am J Trop Med Hyg.* 2012 Oct 3;87(4):584–93.

# Yellow fever

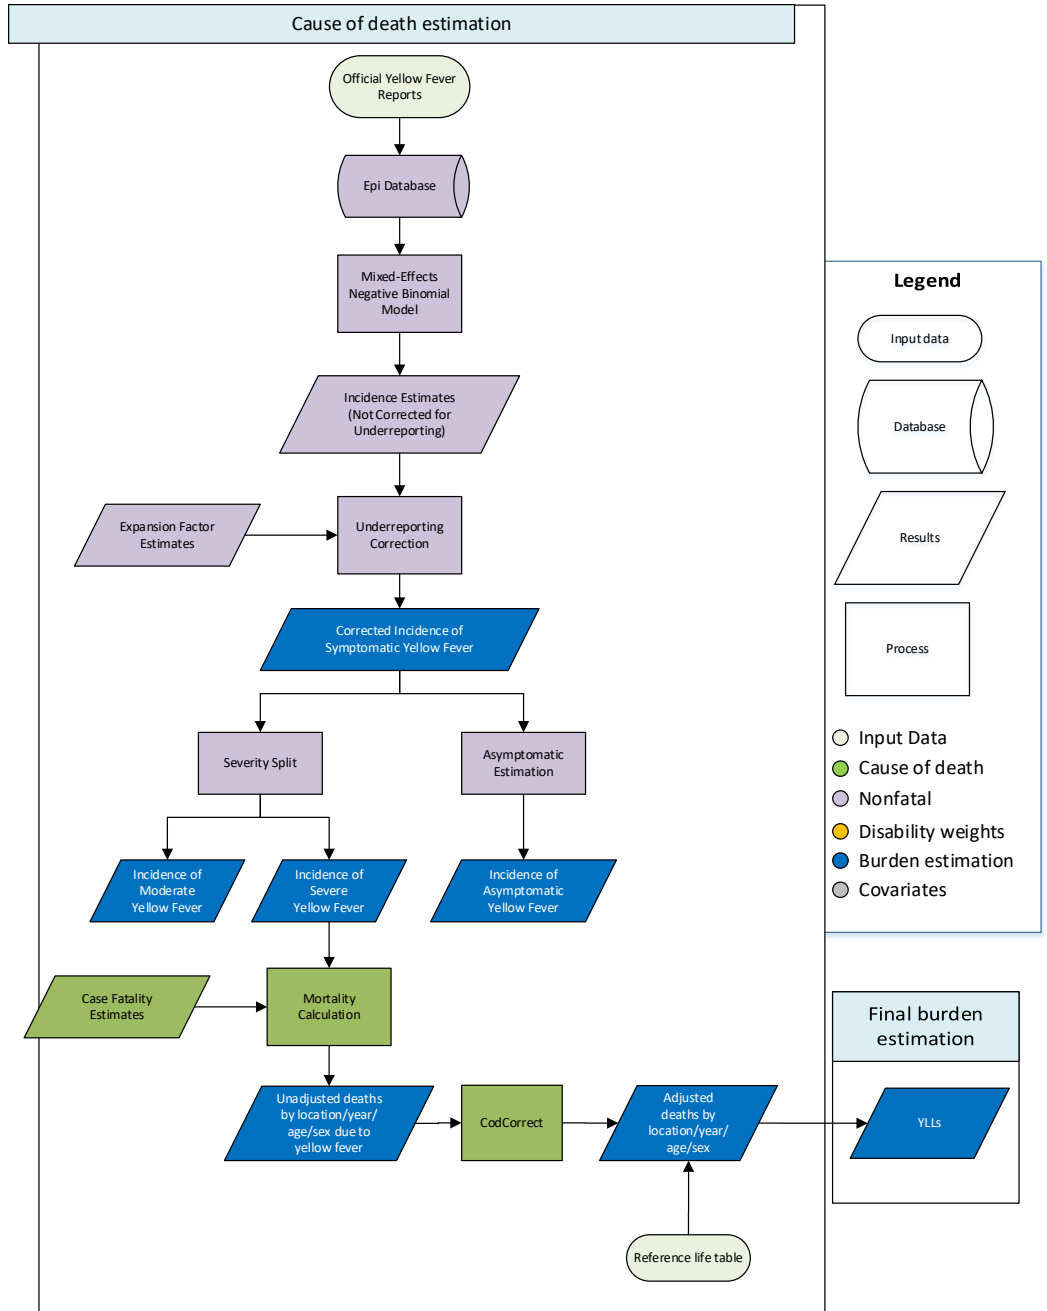

## Input data

Case data come from official case reports filed with the World Health Organization. Data on case fatality come from published studies of yellow fever fatality. Data on deaths in non-endemic countries are restricted to only vital registration data.

## Modelling strategy

We model yellow fever deaths using a hybrid approach. For countries in which yellow fever is endemic, we use a natural history approach in which we estimate deaths as the product of cases and case fatality. For non-endemic countries, we allow for deaths among imported cases where we have vital registration data indicating yellow fever deaths. That is, we assume no yellow fever deaths in non-endemic countries; however, where yellow fever deaths are reported in vital registration data, we accept those as true imported yellow fever deaths.

We model reported cases using a mixed-effects negative binomial model, with fixed effects for year and random effects for super-region, region, and country. We assume that yellow fever cases are underreported and that this underreporting mirrors that of dengue (a disease for which we have better data on underreporting). With that, we estimate symptomatic cases as the product of our base case estimates and dengue expansion factors (ie, the factor by which you must multiply reported cases to derive true cases). Based on published estimates, we assume that 27% of symptomatic cases will be severe.<sup>1</sup>

We performed a meta-analysis of case fatality using data from published studies of yellow fever fatality. Studies tend to report deaths among those with severe infection (eg, hospitalized cases), rather than among all cases. We assume that no deaths occur with asymptomatic infection or among those with only moderate symptoms. With that, we estimate deaths as the product of severe cases and case fatality.

We have improved our method for correcting for underreporting of yellow fever. In estimating yellow fever deaths for GBD 2013, our model assumed that all severe cases were reported and that reported cases reflected only severe cases. With that, we adjusted our base estimates upward to account for non-severe cases, and based our mortality estimates off these adjusted numbers. Based on feedback from collaborators, we believe that this adjustment was inadequate to fully account for underreporting. Accordingly, we have adopted the expansion factor-based method described above for GBD 2015.

Moreover, we have adopted the hybrid approach for GBD 2015. Whereas we previously allowed no yellow fever deaths in non-endemic countries, we now accept deaths reported in vital registration data as true imported deaths.

We have made no substantive changes to the modelling strategy for GBD 2017.

## Reference

1 Johansson MA, Vasconcelos PFC, Staples JE. The whole iceberg: estimating the incidence of yellow fever virus infection from the number of severe cases. *Trans R Soc Trop Med Hyg* 2014; 108: 482–7.

## Rabies

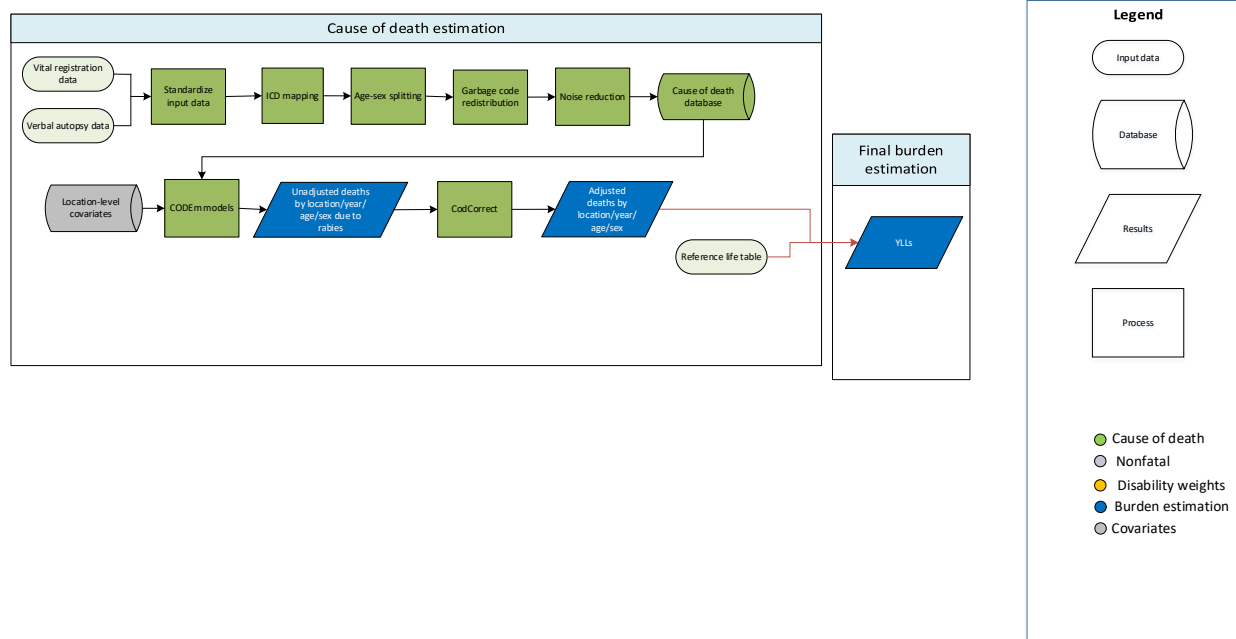

### Input data

We modelled rabies mortality using all available data in the cause of death database. Data points were outliered if they reported an improbable number of rabies deaths (eg, zero rabies deaths in a hyper-endemic country) or if their inclusion in the model yielded distorted trends. In some cases, multiple data sources for the same location differed dramatically both in their quality and reported rabies mortality (eg, a verbal autopsy and vital registration source). In these cases the lower-quality data source was outliered.

### Modelling strategy

We modelled rabies mortality using a two-model hybrid approach: 1) a global CODEm model of all locations, using all data in the CoD database; and 2) a CODEm model restricted to data-rich countries. The CODEm models included nine covariates:

| Level | Covariate                                        | Direction |
|-------|--------------------------------------------------|-----------|
| 1     | Antenatal care coverage (4 visits)               | -         |
|       | Health system access                             | -         |
|       | In-facility delivery coverage                    | -         |
| 2     | Healthcare access and quality index              | -         |
|       | Skilled birth attendance coverage                | -         |
|       | Health system access (capped)                    | -         |
| 3     | Population density, 500-1000 per km <sup>2</sup> | 0         |
|       | Population density, <150 per km <sup>2</sup>     | 0         |
|       | Socio-demographic Index                          | -         |

We have made no substantive changes to the modelling strategy in GBD 2017.

## Ascariasis

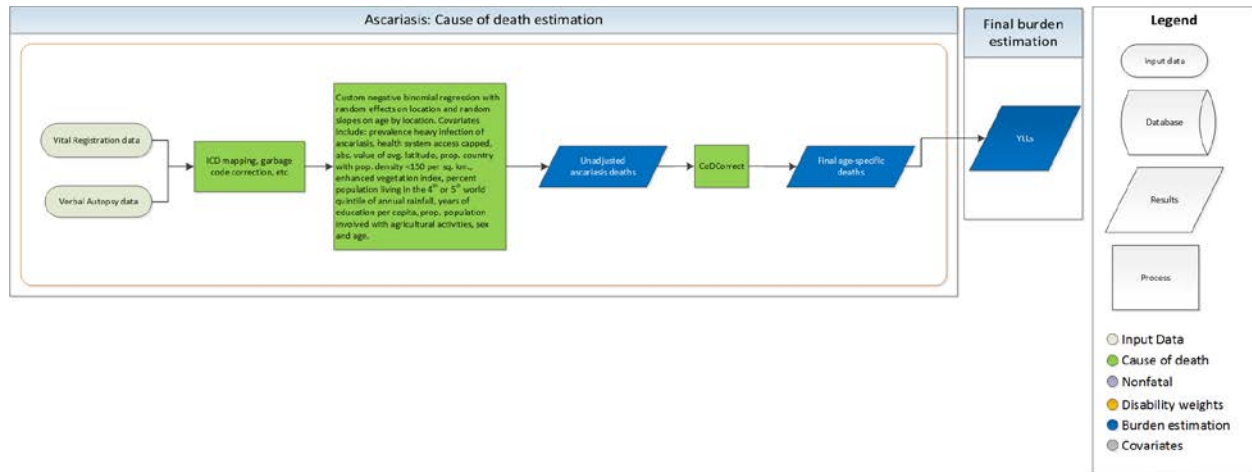

### Input data

To estimate mortality due to ascariasis, country-year-age-sex-specific verbal autopsy and vital registration data were used. Covariates used include prevalence of heavy infection of ascariasis, health system access capped by the minimum OECD value, the absolute value of average latitude, the proportion of the country with population density under 150 people per square kilometer, enhanced vegetation index, percent of the population living in the fourth or fifth world quintile of annual rainfall, number of years of education per capita, proportion of the population involved with agricultural activities, sex, and age.

### Geographic restrictions

We conducted a literature review to determine the geographic extent of the disease and classify locations based on whether the disease is absent or present in each year. Locations that were geographically restricted in any given year did not have estimates made for them but could have imported cases attributed to them at a later stage. Of note, we did not attempt a complete systematic review, since a single high-quality source could offer sufficient evidence of presence. Evidence of absence or presence was not available for every location for each year and so assumptions were made for missing years by taking into consideration the epidemiological characteristics of the disease. If evidence indicated disease presence for two non-consecutive years, we assumed presence for all years between the two. If evidence indicated disease absence for two non-consecutive years, we assumed absence for all years between the two. If evidence indicated a change in status (ie, from absent to present, or present to absent) between two non-consecutive years then we conducted targeted searches to ascertain the relevant year of introduction or elimination for that location. In the cases where presence or absence information was missing for the start or end years of our study interval (1990–2016) without evidence of any introduction or elimination events within the interval, we applied the status of the first and last presence/absence observations respectively to all years between the interval bound and the observation year. Our search was done in conjunction with the title/abstract screening portion of a systematic literature review for prevalence data. The search strings and yield can be viewed in the table below for each of the databases queried.

| Database       | Search string                                                                                                                                                                                                                                                                                                                                                                                                                                                                                                                                                                                                                                                                                                                 | Yield |
|----------------|-------------------------------------------------------------------------------------------------------------------------------------------------------------------------------------------------------------------------------------------------------------------------------------------------------------------------------------------------------------------------------------------------------------------------------------------------------------------------------------------------------------------------------------------------------------------------------------------------------------------------------------------------------------------------------------------------------------------------------|-------|
| PubMed         | (Ascariasis[Title/Abstract] OR Ascaris[Title/Abstract] OR "A. lumbricoides"[Title/Abstract] OR Ascaris[MeSH] OR Trichuris[Title/Abstract] OR Trichuriasis[Title/Abstract] OR "Whip Worm"[Title/Abstract] OR "T. trichura"[Title/Abstract] OR Trichuris[MeSH] OR Hookworm[Title/Abstract] OR "A. duodenale"[Title/Abstract] OR "Ancylostoma duodenale"[Title/Abstract] OR ancylostomiasis[Title/Abstract] OR "N. americanus"[Title/Abstract] OR "Necator americanus"[Title/Abstract] OR necatoriasis[Title/Abstract] OR Ancylostoma [MeSH] OR Necator[MeSH]) AND (prevalence[Title/Abstract] OR incidence[Title/Abstract] OR epidemiology[Title/Abstract] OR surveillance[Title/Abstract]) NOT(Animals[MeSH] NOT Humans[MeSH]) | 2376  |
| Web of Science | (Ascariasis OR Ascaris OR A. lumbricoides OR Trichuris OR Trichuriasis OR Whip Worm OR T. trichura OR Hookworm OR A. duodenale OR Ancylostoma duodenale OR ancylostomiasis OR N. americanus OR Necator americanus OR necatoriasis) AND TOPIC:(prevalence OR incidence OR epidemiology OR surveillance) NOTTOPIC: ((Animals NOT Humans)) Timespan: 1980-2016. Indexes: SCI-EXPANDED, SSCI, A&HCI, ESCI.                                                                                                                                                                                                                                                                                                                        | 2266  |
| SCOPUS         | TITLE-ABS_KEY (ascariasis OR ascaris OR a. lumbricoides OR trichuris OR trichuriasis OR whip worm OR t. trichura OR hookworm OR a. duodenale OR ancylostoma duodenale OR ancylostomiasis OR n. americanus OR necator americanus OR necatoriasis) AND PUBYEAR>1979                                                                                                                                                                                                                                                                                                                                                                                                                                                             | 29    |

These papers were used to classify location-years for all locations and years present in the literature. Additionally, systematic literature reviews, meta-analyses, national health statistics publications, and collaborator input were used to classify location-years not present in the literature review wherever possible.

### Modelling strategy

A negative binomial model was used to estimate deaths from ascariasis with random intercepts for locations and random slopes for age groups by location. A multivariate normal distribution using the mean and variance-covariance matrix from the model was used to generate 1,000 draws of deaths due to ascariasis. The final model was selected based on how well the estimated number fit the input data and how plausible the predicted distribution of disease was over time and with age.

## Ebola Virus Disease

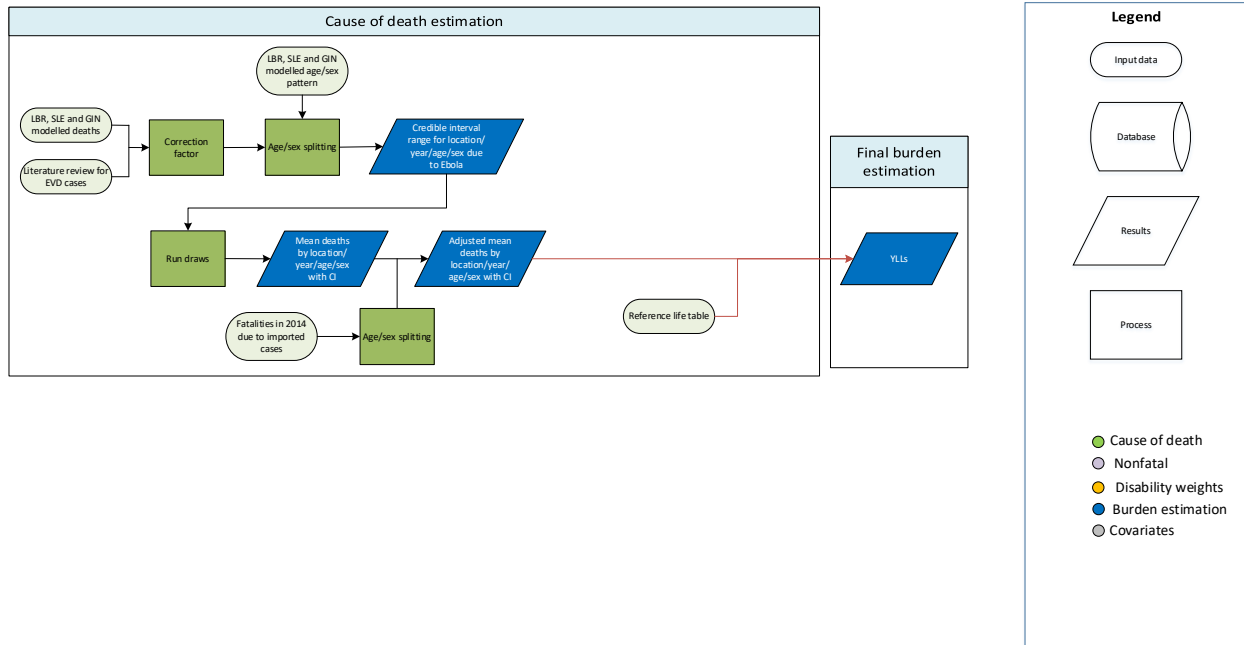

### Input data

The input data for deaths due to Ebola virus disease (EVD) came in two forms: (i) total case count tallies and modelled estimates for the West African outbreak from 2013 to 2016 provided by the World Health Organization (WHO) focused specifically on the three worst-affected countries (Liberia, Guinea, and Sierra Leone) and (ii) literature searches for reported deaths due to EVD not captured by the West African dataset. This is further explained below:

- i. WHO estimates for Liberia, Guinea, and Sierra Leone, 2014–2016
  1. The final tallies as reported by WHO and CDC were used for each country. Researchers from Imperial College London (UK), as part of the WHO Ebola response team, provided modelled estimates for the number of fatalities that result from a given number of reported cases (provided by line lists from WHO). This method was used in a variety of papers to generate baseline estimates of case fatality rates and other key epidemiological measures while correcting for the lag period between initially reporting a case and the final outcome of that case (whether it be death or survival). The full data cleaning and methodology are reported elsewhere.<sup>1,2</sup> Bespoke estimates were provided for GBD for Liberia, Sierra Leone, and Guinea and were stratified by age, sex, and year. Death data from Guinea ranged from February 18, 2014, until September 27, 2015, with data from Liberia ranging from March 20, 2014, to May 4, 2015, and data from Sierra Leone ranging from May 21 until



September 28, 2015. These models were used to disaggregate total case numbers by age and sex to generate the total case counts.

2. Reported clusters of cases in 2016 were identified by consulting WHO situation reports from the year 2016.

ii. Literature searches for reported deaths due to EVD outside of Liberia, Guinea, and Sierra Leone

1. In order to capture the small number of fatalities that occurred in countries outside of the core three mentioned above, WHO Situation Reports were consulted. Fatalities were reported in the US (specifically Texas), Mali, and Nigeria.<sup>3</sup> All deaths occurred in 2014. Additional age and sex information could only be obtained for the death that occurred in the US.

Using a previous review of historical outbreaks,<sup>4,5</sup> original articles describing the progression of historical outbreaks were consulted, which was supplemented by additional searches. This resulted in datasets describing each outbreak with variable degrees of detail – some fully describing the age and sex breakdown of all deaths [eg, Rosello and colleagues<sup>7</sup>] and others simply providing the final total. Only confirmed or probable deaths were included; suspected EVD deaths were omitted. Outbreaks that spanned multiple years, in the absence of sufficient data providing an accurate breakdown, were apportioned between the years by evenly assigning a uniform number of deaths to each month of the outbreak’s duration.

A full tabulation of death metadata availability is found in Table 1.

| Outbreak                              | Number of deaths | Sex metadata | Age metadata                  | Year metadata    |
|---------------------------------------|------------------|--------------|-------------------------------|------------------|
| Côte d’Ivoire 1994                    | No deaths        | N/A          | N/A                           | N/A              |
| Gabon 1994/1995                       | Georges 1999     | Imputed      | Imputed                       | Georges 1999     |
| Democratic Republic of the Congo 1995 | Rosello 2015     | Rosello 2015 | Rosello 2015 [94.5% coverage] | Rosello 2015     |
| Gabon 1996                            | Milleliri 2004   | Imputed      | Imputed                       | Milleliri 2004   |
| Gabon 1996/1997                       | Milleliri 2004   | Imputed      | Imputed                       | Imputed          |
| Uganda 2000/2001                      | Okware 2002      | Imputed      | Imputed                       | Imputed          |
| Congo 2002/2003                       | Kuhn 2008        | Imputed      | Imputed                       | Imputed          |
| Congo 2003                            | Boumandouki 2005 | Imputed      | Imputed                       | Boumandouki 2005 |
| South Sudan 2004                      | WHO 2004         | WHO 2004     | WHO 2004 [42.86% coverage]    | WHO 2004         |
| Congo 2005                            | Nkoghe 2011      | Nkoghe 2011  | Nkoghe 2011                   | Nkoghe 2011      |
| Democratic Republic of the Congo 2007 | Rosello 2015     | Rosello 2015 | Rosello 2015                  | Rosello 2015     |
| Uganda 2007                           | Wamala 2010      | Wamala 2010  | Imputed                       | Wamala 2010      |
| Democratic Republic of the Congo 2008 | Rosello 2015     | Rosello 2015 | Rosello 2015                  | Rosello 2015     |

|                                       |                |                           |                           |                |
|---------------------------------------|----------------|---------------------------|---------------------------|----------------|
| Uganda 2011                           | Shoemaker 2012 | Shoemaker 2012            | Shoemaker 2012            | Shoemaker 2012 |
| Democratic Republic of the Congo 2012 | Rosello 2015   | Rosello 2015              | Rosello 2015              | Rosello 2015   |
| Uganda 2012                           | Albarino 2013  | Imputed                   | Imputed                   | Albarino 2013  |
| Uganda 2012/2013                      | Albarino 2013  | Imputed                   | Imputed                   | Imputed        |
| West Africa 2013/2015                 | WHO/CDC        | WHO/Imperial [incomplete] | WHO/Imperial [incomplete] | WHO/CDC        |
| Democratic Republic of the Congo 2014 | Rosello 2015   | Rosello 2015              | Rosello 2015              | Rosello 2015   |

**Modelling strategy**

Data on deaths resulting from imported cases from 2014 were used as specific count data as it was assumed to be an accurate representation of the cases and outbreaks in these countries, all of which were on high alert for importation of cases.<sup>8,9</sup>

The other input data were processed prior to inclusion in GBD to account for any potential underreporting of deaths. A meta-analysis of existing underreporting studies from the literature was performed, using a random effects model with a DerSimonian-Laird estimator. A variety of sources were included, capturing a number of different estimation processes, all identified by literature review. The figure below shows the different effect sizes of the different studies,<sup>10-15</sup> as well as the resulting GBD 2016 correction factor, with the GBD 2015 correction factor for reference. The correction factor ranged from 1.4580 to 2.5475, with a mean of 2.0027. For GBD 2017 the GBD 2016 factor was used.

### Underreporting of Ebola death data

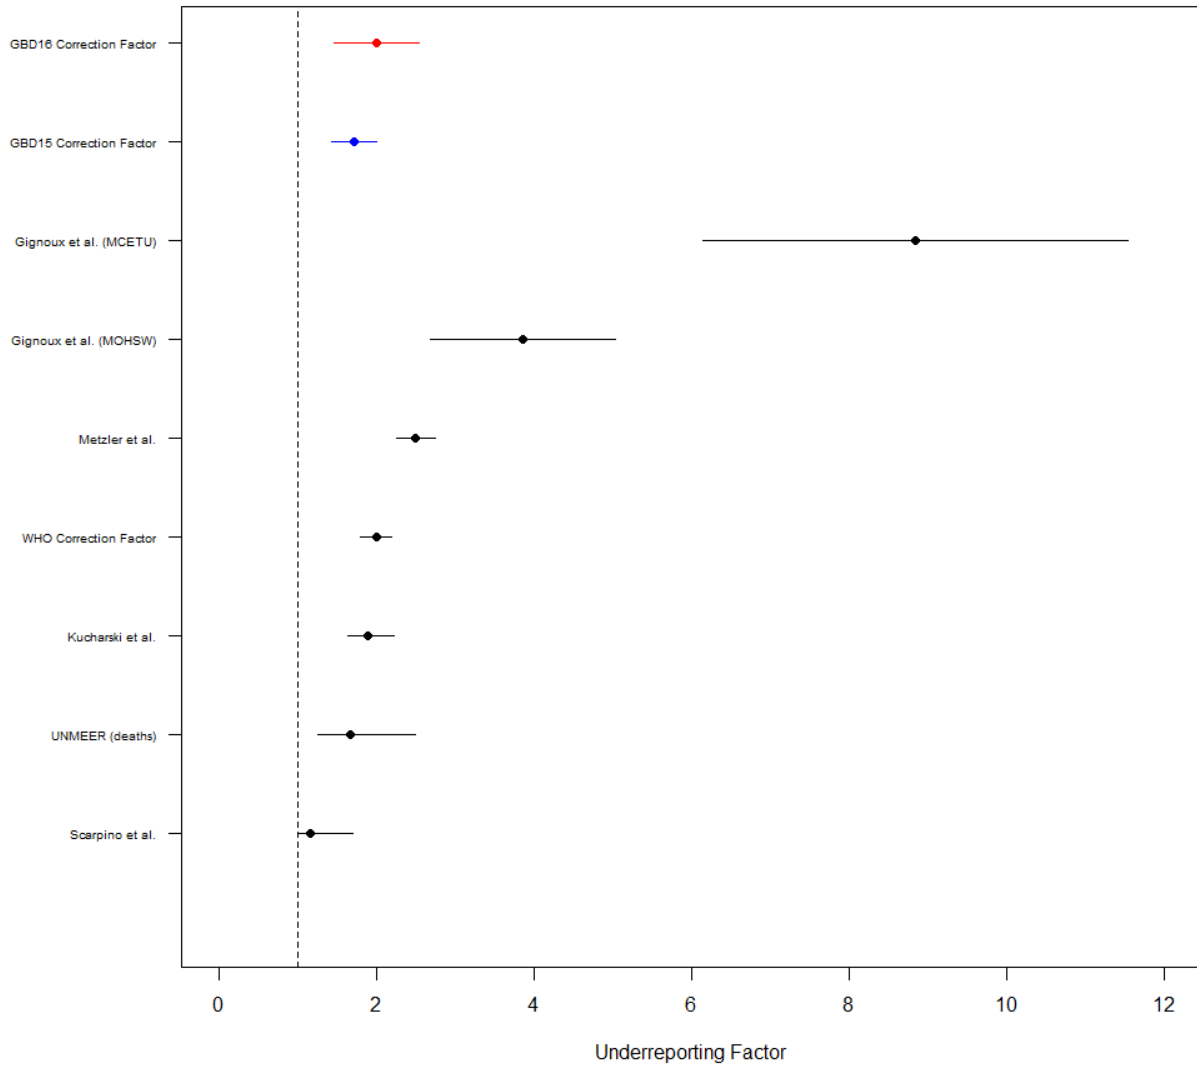

In order to capture this potential variation, all input data were multiplied by the lower and upper limit of this estimated correction factor; these numbers then provided the lower and upper bounds from which draw values were taken. For outbreaks where no data were supplied for age and/or sex, the pattern observed in the West African outbreak (for which there were the most comprehensive data) was used to apportion these total values.

One thousand draws were taken from a normal distribution fitted between these lower and upper bound values, which generated mean estimates stratified by age, sex, location, and year along with credible intervals for these numbers. These estimates were then adjusted by including the count data for imported cases from 2014.

Data on Ebola outbreaks prior to 2014 are sparse, and as a result many values derived from the West African outbreak were assumed to be valid for historical outbreaks as well. This may mask significant differences that exist between these outbreaks, some of which were caused by different species of

*Ebolavirus*. In order to minimize this problem, we chose to implement a data-driven approach – for those outbreaks where sufficiently detailed historical data could be obtained, these were used in preference to any assumed age/sex breakdown.

## References

- 1 Agua-Agum J, Ariyarajah A, Aylward B, *et al.* West African Ebola Epidemic after One Year — Slowing but Not Yet under Control. *N Engl J Med* 2015; **372**: 584–7.
- 2 Ebola Virus Disease in West Africa - The First 9 Months of the Epidemic and Forward Projections. *N Engl J Med* 2014; **371**: 1481–95.
- 3 World Health Organization. Ebola Situation Reports. 2016. Interview (accessed March 14, 2016).
- 4 Pigott DM, Golding N, Mylne A, *et al.* Mapping the zoonotic niche of Ebola virus disease in Africa. *Elife* 2014; **3**: e04395.
- 5 Mylne A, Brady OJ, Huang Z, *et al.* A comprehensive database of the geographic spread of past human Ebola outbreaks. *Sci Data* 2014; **1**: 140042.
- 6 Maganga GD, Kapetshi J, Berthet N, *et al.* Ebola virus disease in the Democratic Republic of Congo. *N Engl J Med* 2014; **371**: 2083–91.
- 7 Rosello A, Mossoko M, Flasche S, *et al.* Ebola virus disease in the Democratic Republic of the Congo, 1976-2014. *Elife* 2015; **4**. DOI:10.7554/eLife.09015.
- 8 Fasina FO, Shittu A, Lazarus D, *et al.* Transmission dynamics and control of Ebola virus disease outbreak in Nigeria, July to September 2014. *Euro Surveill* 2014; **19**: 20920.
- 9 Althaus CL, Low N, Musa EO, Shuaib F, Gsteiger S. Ebola virus disease outbreak in Nigeria: Transmission dynamics and rapid control. *Epidemics* 2015; **11**: 80–4.
- 10 Gignoux E, Idowu R, Bawo L, *et al.* Use of Capture-Recapture to Estimate Underreporting of Ebola Virus Disease, Montserrado County, Liberia. *Emerg Infect Dis* 2015; **21**: 2265–7.
- 11 Meltzer MI, Atkins CY, Santibanez S, *et al.* Estimating the future number of cases in the Ebola epidemic--Liberia and Sierra Leone, 2014-2015. *MMWR Suppl* 2014; **63**: 1–14.
- 12 Scarpino S V, Iamarino A, Wells C, *et al.* Epidemiological and viral genomic sequence analysis of the 2014 ebola outbreak reveals clustered transmission. *Clin Infect Dis* 2015; **60**: 1079–82.
- 13 Kucharski AJ, Camacho A, Flasche S, Glover RE, Edmunds WJ, Funk S. Measuring the impact of Ebola control measures in Sierra Leone. *Proc Natl Acad Sci U S A* 2015; **112**: 14366–71.
- 14 UNMEER. Sierra Leone: Ebola emergency Weekly Situation Report No. 7. 2014 [https://www.humanitarianresponse.info/system/files/documents/files/UNMEER\\_NERC\\_SitRep\\_07Dec.pdf](https://www.humanitarianresponse.info/system/files/documents/files/UNMEER_NERC_SitRep_07Dec.pdf).
- 15 Enserink M. How many Ebola cases are there really? | Science | AAAS. 2014. <http://www.sciencemag.org/news/2014/10/how-many-ebola-cases-are-there-really> (accessed Jan 28, 2017).

## Zika Virus Disease

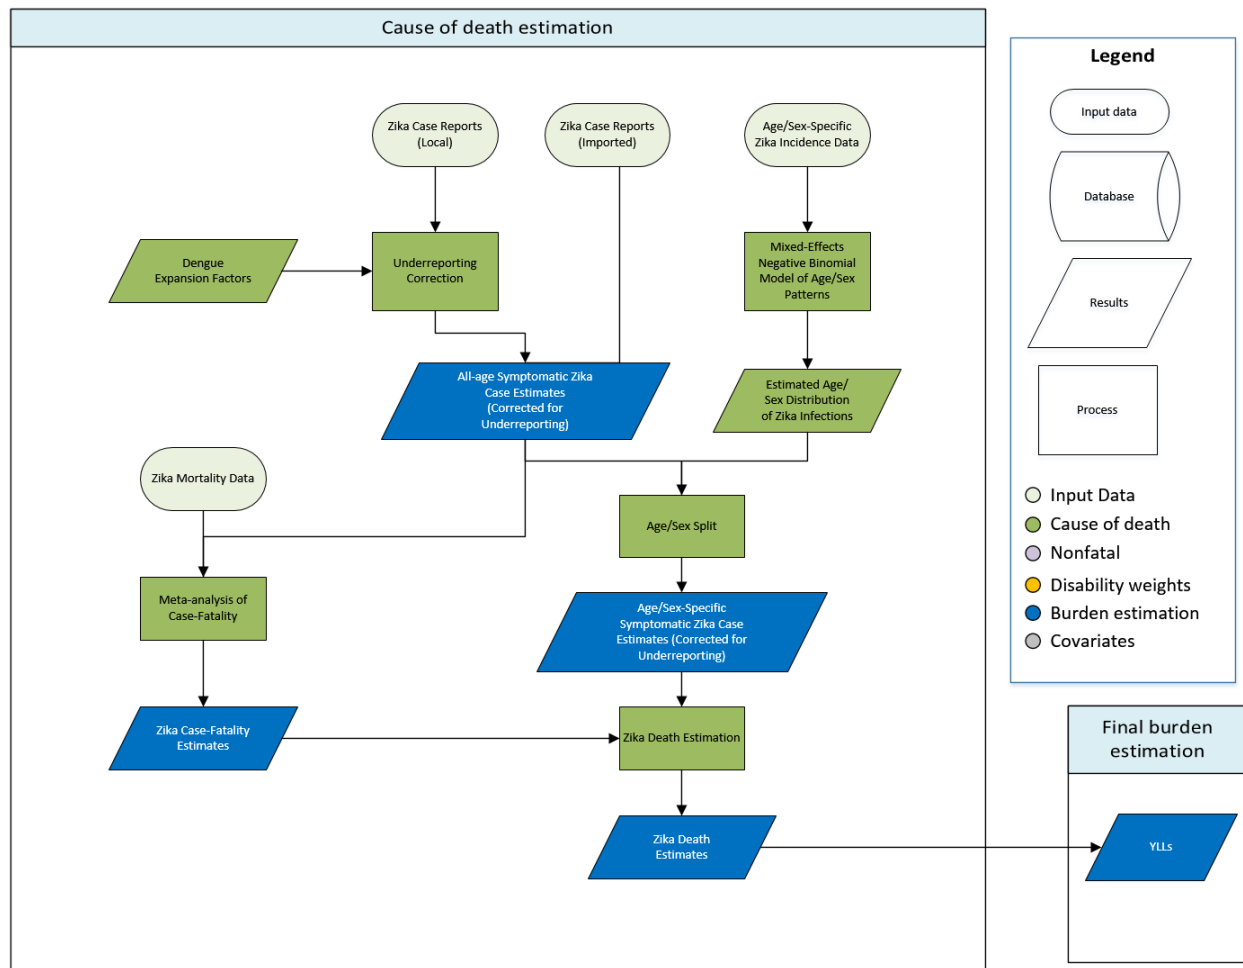

### Input data

Case data and death data come from official reports, primarily from PAHO.

### Modelling strategy

We model Zika deaths using a natural history approach in which we estimate deaths as the product of cases and case fatality. We estimate the number of true symptomatic cases as the product of reported cases and country-specific expansion factors that adjust for underreporting. Those expansion factors are derived from our dengue model and the methods used for their estimation are detailed in the dengue model documentation and by Stanaway and colleagues<sup>1</sup>.

We then use an intercept only, mixed-effects Poisson regression model, with random effects on location, to estimate case fatality. Here, our outcome variable is reported Zika deaths and our exposure variable is estimated number of symptomatic Zika cases. For location-years with reported Zika deaths, we estimate deaths from the fixed effects (ie, intercept and offset) and random effects, including

uncertainty from both effects. For location-years with no Zika death reports, but with reported Zika cases, we estimate deaths from the fixed effects and sample from the distribution of all random effects.

For GBD 2017, we have both refreshed the data as well as conducted two systematic literature reviews to more completely incorporate the growing literature on Zika.

## **Reference**

1 Stanaway JD, Shepard DS, Undurraga EA, Halasa YA, Coffeng LE, Brady OJ, et al. The global burden of dengue: an analysis from the Global Burden of Disease Study 2013. *The Lancet Infectious Diseases* [Internet]. 2016 Feb

## Other neglected tropical diseases (NTDs)

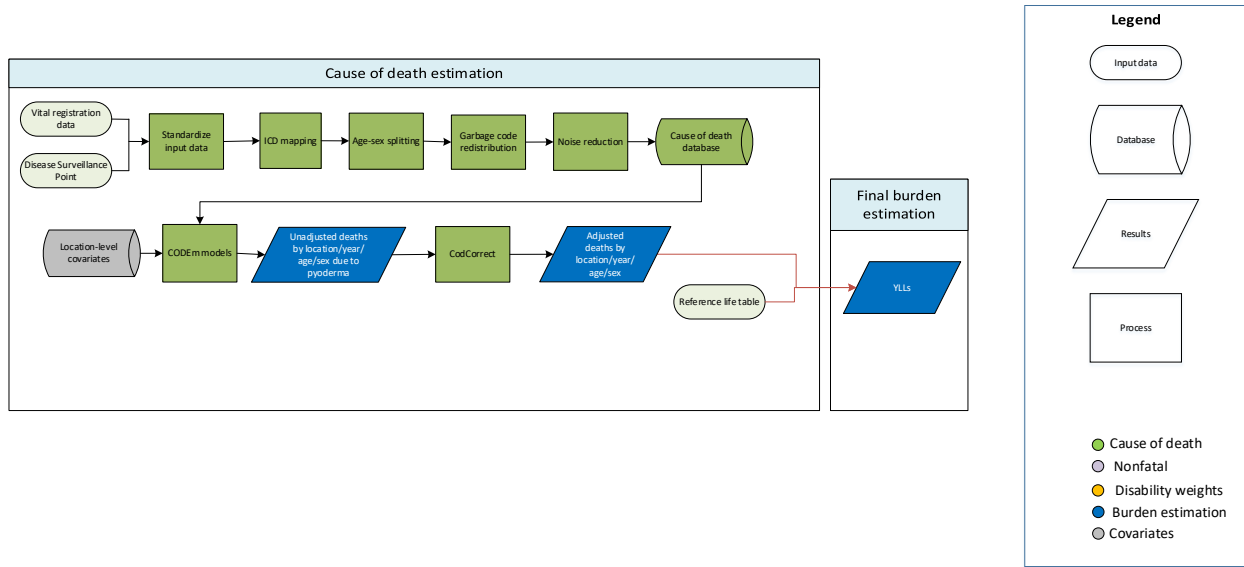

### Input data

We modelled other neglected tropical disease mortality using all available data in the cause of death database. Data points were outliered if they reported an improbable number of deaths or if their inclusion in the model yielded distorted trends.

### Modelling strategy

We modelled other neglected tropical disease mortality using a two-model hybrid approach: 1) a global CODEm model of all locations, using all data in the CoD database; and 2) a CODEm model restricted to data-rich countries.

We have made no substantive changes in the modelling strategy for other neglected tropical diseases from GBD 2016.

| Level | Covariate                                                                       | Direction |
|-------|---------------------------------------------------------------------------------|-----------|
| 1     | Healthcare access and quality index                                             | -         |
|       | Proportion of the population living between 0 and 15 degrees latitude           | +         |
| 2     | Proportion of the population living in the 5 <sup>th</sup> quintile of rainfall | +         |
|       | Sanitation                                                                      | -         |
| 3     | Education (years per capita)                                                    | -         |
|       | Lag-distributed income (per capita)                                             | -         |
|       | Socio-demographic Index                                                         | -         |

# Meningitis

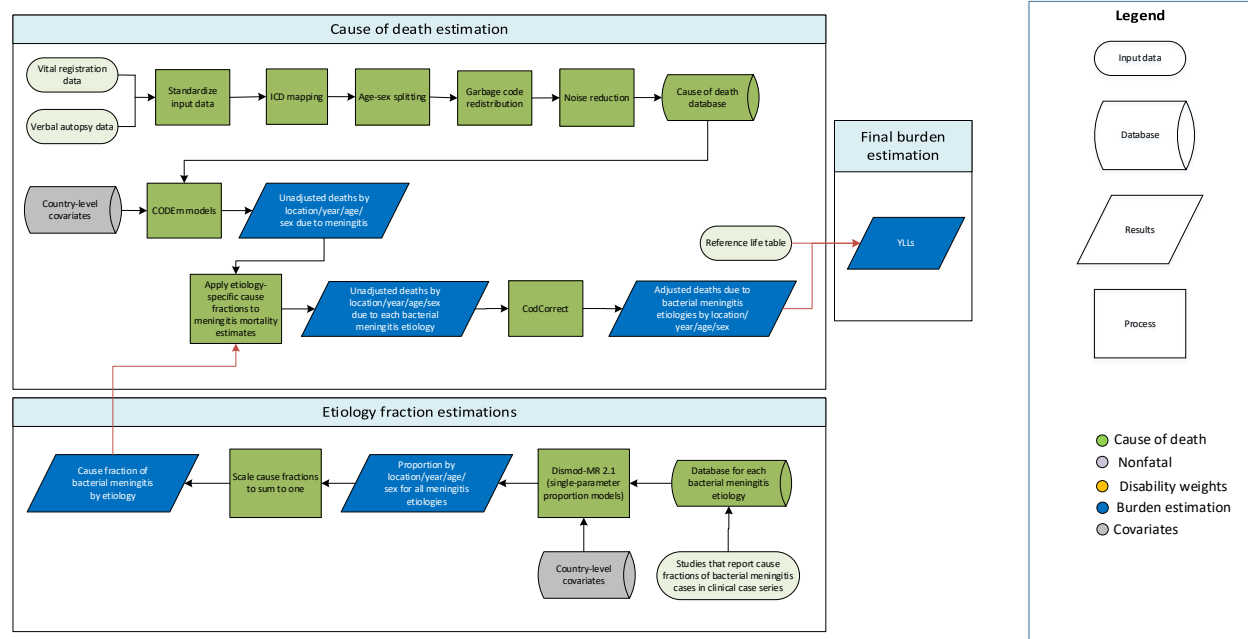

## Input data

Input data for the overall meningitis model came from the cause of death database, which includes vital registration (VR) and verbal autopsy (VA) data. We outliered data in instances where garbage code redistribution and noise reduction, in combination with small sample sizes, resulted in unreasonable cause fractions when compared to regional, super-regional, and global rates, and data that violated well-established time or age trends. Outliering methods were consistent across both VR and VA data.

Etiology splits are derived from cause-specific VR mortality data. Viral meningitis mortality is rare except in the youngest age groups and is included with “other meningitis” etiology.

## Modelling strategy

We modeled deaths due to all bacterial meningitis with two CODEm models, separately for each sex and two age categories – under 5 and 5 years and above. The mortality trends differ substantially between children and adults, and there are a significant number of data sources that only have data for children under 5. The two models used the same covariates and otherwise standard CODEm parameters. The final sex-specific models for deaths due to all bacterial meningitis were a hybridised model of separate global and data-rich models for males and females.

To obtain estimates for each of the four etiologies of bacterial meningitis – meningococcal, pneumococcal, *H. influenzae* type B, and other bacterial – we ran separate proportion models in DisMod-MR 2.1 using cause-specific VR data. The meningococcal meningitis proportion model used two country-level covariates to inform the model – proportion of the population living within the meningitis belt<sup>1</sup>, and proportion of the population covered by the meningococcal meningitis type A vaccine (an initiative called Menafrivac). The pneumococcal meningitis model was informed by PCV3 vaccine



coverage, and the H influenza type B meningitis model was informed by Hib3 vaccine coverage. The other meningitis proportion model did not use any country-level covariates.

Since DisMod-MR 2.1 estimates in 5-year intervals, the etiological proportions for years between the intervals were interpolated at the draw level. The four proportion models were scaled to 1 at the draw level for each location, year, sex, and age combination. We applied these proportions to the total meningitis cause of death models to produce estimates for each of the four etiologies. In GBD 2017 we added the same vaccine-specific covariates used in the mortality proportion models to the parent meningitis mortality model. Covariates were weighted and selected in the ensemble modelling process. The covariate inputs for the final published CODEm parent models, and the coefficients for the VR etiology proportion models are listed below.

### Parent Meningitis CODEm model covariate table (0-4 years, 5-95+ years)

| Covariate Name                                     | Level | Direction |
|----------------------------------------------------|-------|-----------|
| Meningitis belt (proportion of population in belt) | 1     | 1         |
| Menafravac coverage                                | 1     | -1        |
| H influenzae B proportion covered                  | 1     | -1        |
| Underweight proportion                             | 2     | 1         |
| Water (proportion with access)                     | 2     | -1        |
| Health system access                               | 2     | -1        |
| Healthcare access and quality index                | 2     | -1        |
| DTP3 Coverage                                      | 3     | -1        |
| LDI                                                | 3     | -1        |
| Sanitation (proportion with access)                | 3     | -1        |
| Maternal education (years per capita)              | 3     | -1        |
| Socio-demographic Index                            | 3     | -1        |

### Vital registration etiology proportion DisMod model covariate tables

#### Meningococcal mortality proportion

| Measure    | Covariate                                                                                                 | Type    | beta                    | exp beta           |
|------------|-----------------------------------------------------------------------------------------------------------|---------|-------------------------|--------------------|
| Proportion | meningitis belt (proportion)                                                                              | Country | 0.029 ( 0.00052 — 0.14) | 1.03 (1.00 — 1.15) |
| Proportion | Proportion of total population covered by menafrivac initiative (meningitis meningococcal type A vaccine) | Country | -1 ( -2 — -0.0053)      | 0.37 (0.14 — 0.99) |

#### H influenzae B mortality proportion

| Measure    | Covariate                          | Type    | beta                      | exp beta           |
|------------|------------------------------------|---------|---------------------------|--------------------|
| Proportion | Hib3 Vaccine Coverage (proportion) | Country | -0.04 ( -0.098 — -0.0022) | 0.96 (0.91 — 1.00) |

### Pneumococcal mortality proportion

| Measure    | Covariate                  | Type    | beta                              | exp beta           |
|------------|----------------------------|---------|-----------------------------------|--------------------|
| Proportion | PCV3 Coverage (proportion) | Country | -0.0017 ( -0.0048 — -<br>0.00026) | 1.00 (1.00 — 1.00) |

### References

(1) Centers for Disease Control (CDC). CDC health information for international travel 2016: the yellow book. New York City, United States: Oxford University Press, USA, 2016.

## Encephalitis

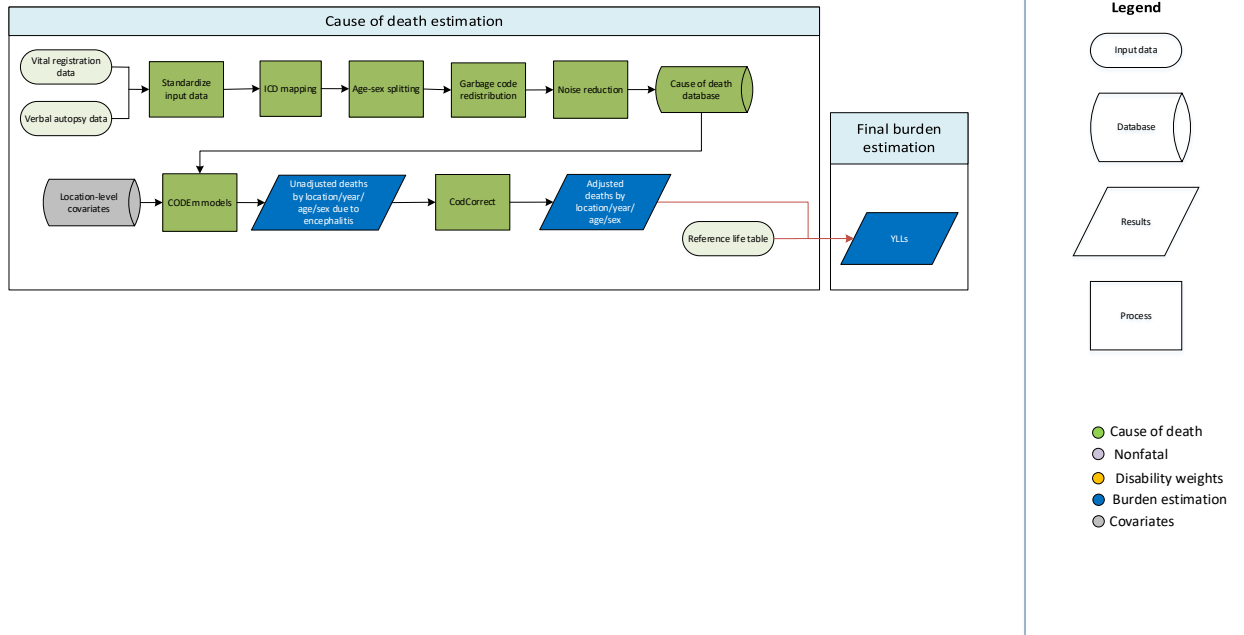

### Input data

For GBD 2017, vital registration and verbal autopsy data were used to model this cause. We outliered data in instances where garbage code redistribution and noise reduction, in combination with small sample sizes, resulted in unreasonable cause fractions when compared to regional, super-regional, and global rates, and data that violated well-established time or age trends. Outliering methods were consistent across both vital registration and verbal autopsy data.

### Modelling strategy

We modelled deaths due to encephalitis with a standard CODEm model using the cause of death database and location-level covariates as inputs. We hybridised separate global and data-rich models to acquire unadjusted results, which were adjusted using CodCorrect to reach final years of life lost (YLLs) due to encephalitis.

We previously used two separate age models for encephalitis, 0-5 years and 5-95. Starting in GBD 2015, we modelled encephalitis using the full age range in one model. Another significant change was the addition of the Japanese encephalitis covariate, which is a binary covariate indicating if the location is known to be endemic for Japanese encephalitis. The covariate was modelled according to data from the Centers for Disease Control and Prevention.<sup>1</sup> For GBD 2017, we updated the Japanese encephalitis covariate to include regions of Russia that are included as endemic regions in the CDC report. We also added the DTP3 coverage covariate to the model. A full list of covariate inputs in the published model can be found below. Covariates were weighted and selected based on the ensemble model process.

| <b>Covariate Name</b>                 | <b>Level</b> | <b>Direction</b> |
|---------------------------------------|--------------|------------------|
| Japanese encephalitis binary          | 1            | 1                |
| Underweight proportion                | 1            | 1                |
| LDI                                   | 2            | -1               |
| Health system access                  | 2            | -1               |
| Healthcare access and quality index   | 2            | -1               |
| DTP3 coverage                         | 3            | -1               |
| Proportion of in-facility deliveries  | 3            | -1               |
| Sanitation (proportion with access)   | 3            | -1               |
| Water (proportion with access)        | 3            | -1               |
| Maternal education (years per capita) | 3            | -1               |
| Socio-demographic Index               | 3            | -1               |

## References

- (1) Centers for Disease Control (CDC). CDC health information for international travel 2016: the yellow book. New York City, United States: Oxford University Press, USA, 2016.

# Diphtheria

## Model flowchart

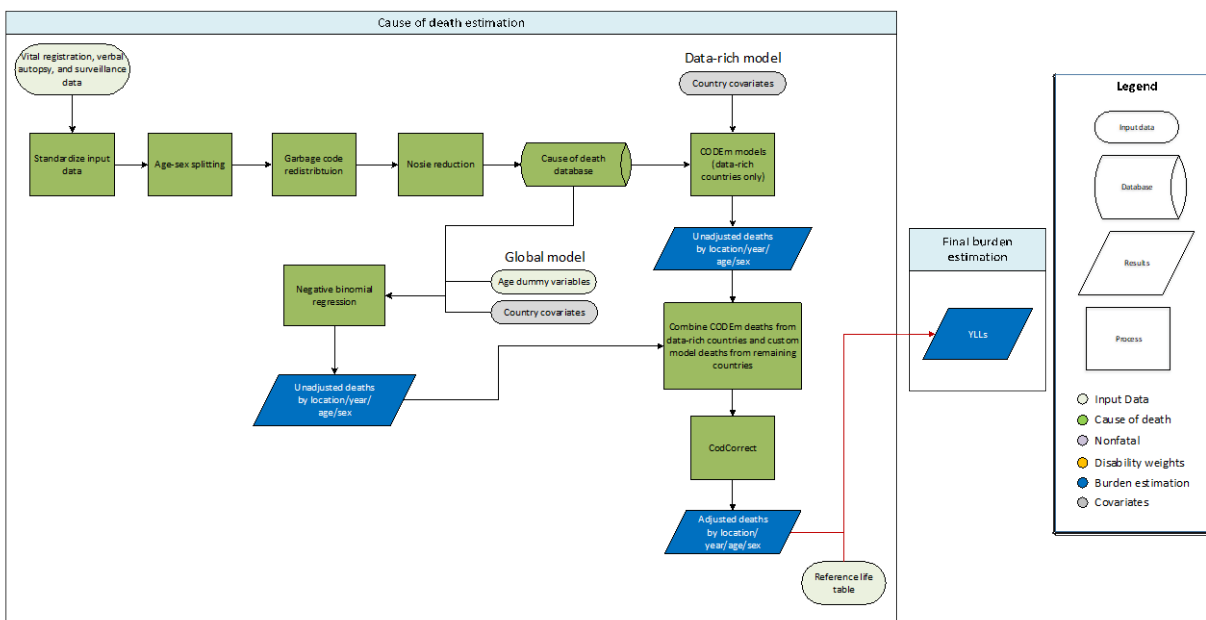

## Modelling strategy overview

For this round of the GBD, we implemented two separate methods for modelling diphtheria mortality based on the quality of available vital registration data. For countries with well-defined vital registration (ie, “data-rich” countries), we used a cause of death ensemble model (CODEm) approach. For the remaining countries, we used a custom count model approach.

### Data-rich countries

For data-rich countries, we used a CODEm strategy in count space to model vital registration (VR) data through time using the following country covariates:

| Level | Covariate                                                           | Direction |
|-------|---------------------------------------------------------------------|-----------|
| 1     | Diphtheria-tetanus-pertussis third-dose vaccination coverage (DTP3) | -         |
|       | Health systems access (capped)                                      | -         |
|       | Healthcare access and quality (HAQ) index                           | -         |
|       | Wasting (proportion under 2SD)                                      | +         |
| 3     | Lagged-distributed income (LDI)                                     | -         |
|       | Socio-demographic Index (SDI)                                       | -         |
|       | Mean years of education per capita                                  | -         |

Models in count space had lower out-of-sample root mean squared error (RMSE) than rate-space models and were thus chosen as final models for these data-rich countries.

### Custom count model

To inform the custom model of diphtheria mortality, vital registration and surveillance data from the cause of death database were used. Data with very high cause fractions (those greater than the 99th percentile values) were excluded.

Due to the small number of recorded deaths, diphtheria mortality was modelled using a negative binomial regression. Cause fractions representing number of deaths as a proportion of the all-cause mortality envelope were regressed on the diphtheria-pertussis-tetanus third-dose (DTP3) vaccine coverage covariate with dummy variables for each GBD age group, with death counts as the dependent variable and the offset as the total number of deaths:

$$Y_{ij} = \beta_0 + \beta_1 DTP3_{ij} + age_{a_{ij}} + e_{ij},$$

where  $Y_{ij}$  is the log-transformed cause fraction,  $\beta_0$  is the fixed-effect intercept,  $\beta_1$  is the fixed-effects slope on vaccine coverage,  $age_{a_{ij}}$  is the dummy variable for each GBD age group in the estimation,  $e_{ij}$  is the residual,  $i$  is the year, and  $j$  is the location. The negative binomial model was used here over a Poisson count model because it more appropriately accounts for large variance (over-dispersion) in the data. Uncertainty was estimated by taking 1,000 iterations of the predictions based on the variance-covariance matrix and a random sample of the dispersion parameter from a gamma distribution.

# Pertussis (whooping cough)

## Model flowchart

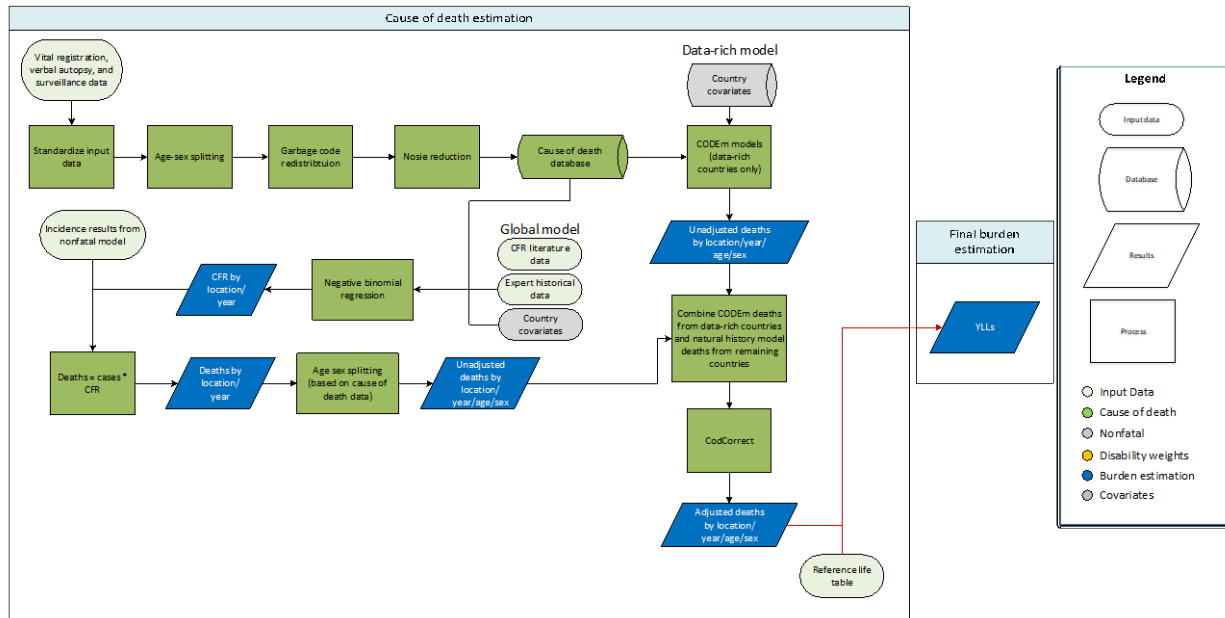

## Modelling strategy overview

We implemented two separate methods for modeling pertussis mortality based on the quality of available vital registration data. For countries with well-defined vital registration (ie, “data-rich” countries), we used a cause of death ensemble model (CODEm) approach. For the remaining countries, we used a natural history model approach. For all countries, we estimated for the age range post-neonatal to 59 years.

## Data-rich countries

For data-rich countries (ie, countries with vital registration more than 65% complete for all GBD estimation years, 1980–2017), we used a strategy in count space to model vital registration (VR) data through time using the following country covariates:

| Level | Covariate                                                           | Direction |
|-------|---------------------------------------------------------------------|-----------|
| 1     | Diphtheria-tetanus-pertussis third-dose vaccination coverage (DTP3) | -         |
|       | Health system access (capped)                                       | -         |
|       | Malnutrition                                                        | +         |
|       | Healthcare access and quality (HAQ) index                           | -         |
| 3     | Lagged-distributed income (LDI)                                     | -         |
|       | Socio-demographic Index (SDI)                                       | -         |
|       | Mean years of education per capita                                  | -         |

Models in count space (as opposed to rate space) had lower out-of-sample root mean squared error (RMSE) and were thus chosen as final models for these countries.

#### Natural history model

To inform the natural history model that was used as the modelling approach for countries without well-defined vital registration, we used data from the following sources: World Health Organization (WHO) case notifications; historical case notifications for the United Kingdom back to 1940; vital registration (VR) data in countries defined as “data-rich”; case fatality data identified by collaborators; and case fatality data identified through systematic literature reviews. The PubMed search query was: (whooping cough [Title/Abstract]) OR (pertussis [Title/Abstract]) AND (case fatality [Title/Abstract]). Studies were included if they reported case fatality rate, number of deaths, and number of cases. Studies were excluded if they included non-representative samples only.

Pertussis mortality in these remaining countries was modelled using a natural history-based model because CODEm does not predict well for countries without data.

First, we modelled log-transformed incidence from whooping cough case notifications reported to WHO (1985–2017) with diphtheria-tetanus-pertussis dose three (DTP3) vaccination coverage using the following equation:

$$Y_{ij} = \beta_0 + \beta_1 DTP3_{ij} + u_j + e_{ij},$$

where  $Y_{ij}$  is the log-transformed incidence rate (in cases per 100,000 persons using WHO case notifications and GBD populations),  $\beta_0$  is the fixed effect intercept,  $\beta_1$  is the fixed effects slope on the log-transformed proportion of unvaccinated individuals,  $u_j$  is the country random effect,  $e_{ij}$  is the residual,  $i$  is the year, and  $j$  is the location. Historical data of UK pertussis cases and UK DTP3 coverage rates (both back to 1940) were also used to inform the incidence model. The random effect by country allowed for registration completeness to vary by country.

The results of this model were then used to predict incidence as a function of vaccine coverage. To correct for underreporting in case notifications, we used a value of the random effect that matched the highest random effect in a high-income region – Switzerland (which has a pertussis monitoring system which captures a high percentage of cases) – to get an implied attack rate assumed to be the same for all unvaccinated populations. Uncertainty was estimated by taking 1,000 iterations of the predictions based on the variance-covariance matrix.

Second, we modelled the pertussis case fatality rate using a negative binomial model with the healthcare access and quality (HAQ) index as a covariate:

$$Y_{ij} = \beta_0 + \beta_1 HAQ_{ij} + u_j + e_{ij},$$

where  $Y_{ij}$  is the number of deaths (using pertussis cases as the offset term);  $\beta_0$  is the fixed-effect intercept;  $\beta_1$  is the fixed-effects slopes on the healthcare access and quality (HAQ) index;  $u_j$  is country-level random effects;  $e_{ij}$  is the residual;  $i$  is the year; and  $j$  is the location. Uncertainty was estimated by taking 1,000 iterations of the predictions based on the variance-covariance matrix and a random sample from a gamma distribution of the dispersion parameter.



Finally, whooping cough deaths were calculated at the 1,000-draw level as

$$deaths = incidence * CFR .$$

We estimated overall number of deaths and then assigned an age-sex distribution based on the age- and sex-specific patterns found in the cause of death data.

# Tetanus

## Model flowchart

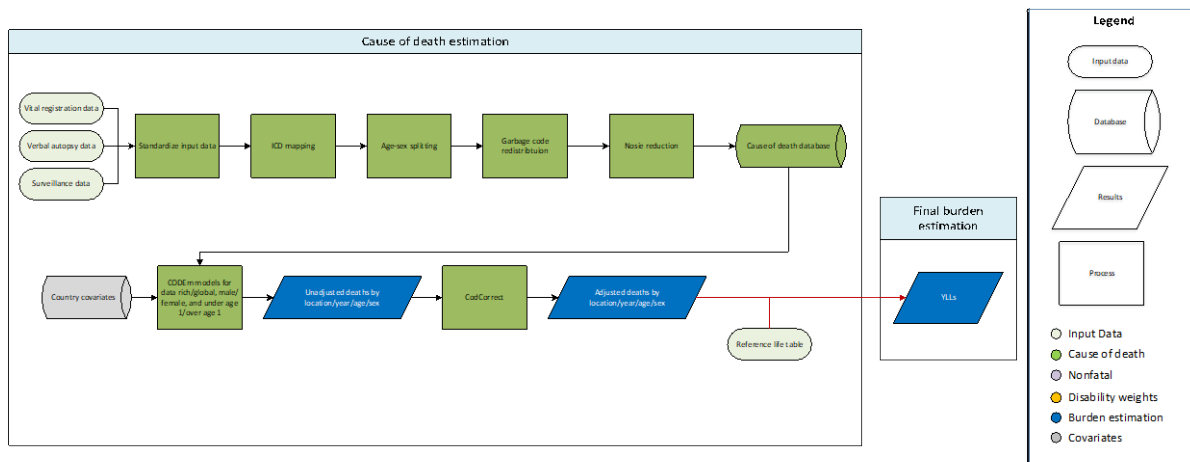

### Input data

Mortality data from vital registration, verbal autopsy, and surveillance sources were used in tetanus cause of death models. Data were excluded if they largely conflicted with the majority of data from other studies conducted either in the same or different countries in the same region with similar sociodemographic characteristics.

### Modelling strategy

A count-space cause of death ensemble modelling strategy (CODEm) was used. We ran separate models by age (under 1 year and 1 to 95+ years of age), sex (male and female), and data quality (data-rich and global). We used the following covariates for the under-1 models:

| Level | Covariate                                                           | Direction |
|-------|---------------------------------------------------------------------|-----------|
| 1     | Diphtheria-tetanus-pertussis third-dose vaccination coverage (DTP3) | -         |
|       | Tetanus toxoid coverage                                             | -         |
| 2     | In-facility deliveries (proportion)                                 | -         |
|       | Skilled birth attendance (proportion)                               | -         |
|       | Health systems access (capped)                                      | -         |
|       | Healthcare access and quality index (HAQ)                           | -         |
| 3     | Lagged-distributed income (LDI)                                     | -         |
|       | Socio-demographic Index (SDI)                                       | -         |
|       | Mean years of education per capita                                  | -         |

and the following covariates for the 1+ models:

| Level | Covariate                                                           | Direction |
|-------|---------------------------------------------------------------------|-----------|
| 1     | Diphtheria-tetanus-pertussis third-dose vaccination coverage (DTP3) | -         |
| 2     | Health systems access (capped)                                      | -         |

|   |                                           |   |
|---|-------------------------------------------|---|
|   | Healthcare access and quality index (HAQ) | - |
| 3 | Sanitation (proportion)                   | - |
|   | Lagged-distributed income (LDI)           | - |
|   | Socio-demographic Index (SDI)             | - |
|   | Mean years of education per capita        | - |

Models in count space had lower out-of-sample root mean squared error (RMSE) than rate-space models and were thus chosen as final models for these data-rich countries.

# Measles

## Model flowchart

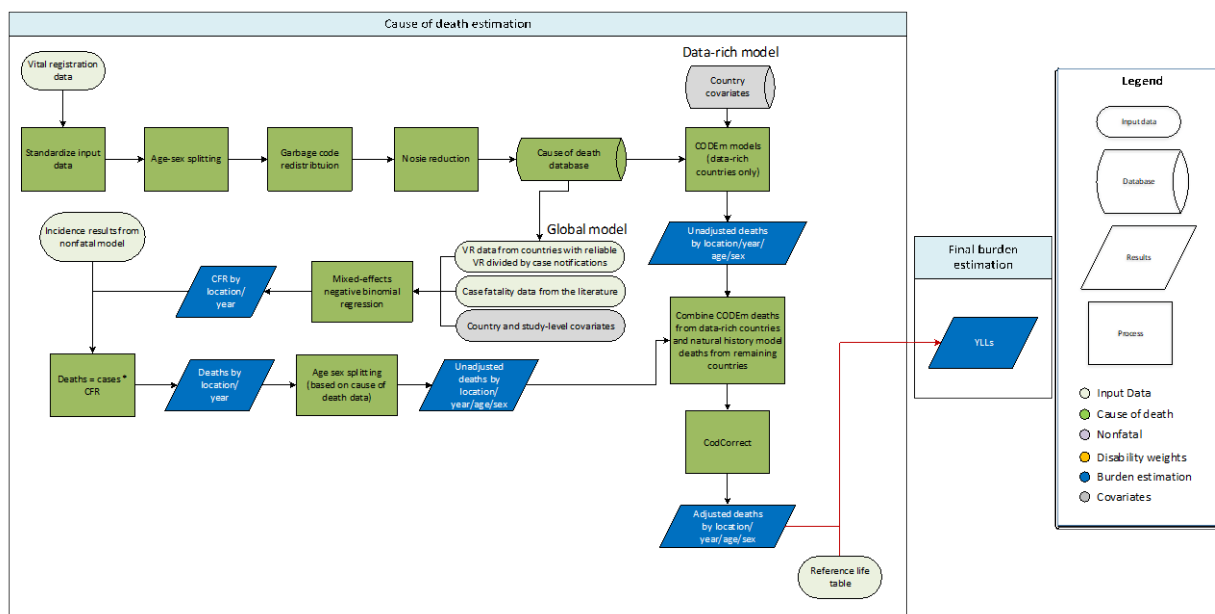

## Modelling strategy overview

We implemented two separate methods for modelling measles mortality based on the quality of available vital registration data. For countries with well-defined vital registration (ie, “data-rich” countries), we used a cause of death ensemble model (CODEm) approach. For the remaining countries, we used a natural history model approach. For all countries, we estimated for the age range post-neonatal to 59 years.

### Data-rich countries

For data-rich countries, we used a CODEm strategy in count space to model vital registration (VR) data through time using the following country covariates:

| Level | Covariate                                      | Direction |
|-------|------------------------------------------------|-----------|
| 1     | Measles-containing vaccination dose one (MCV1) | -         |
| 2     | Healthcare access and quality (HAQ) index      | -         |
| 3     | Health systems access (capped)                 | -         |
|       | Socio-demographic Index (SDI)                  | -         |
|       | Mean years of education per capita             | -         |

Covariates including measles-containing vaccination dose two (MCV2) coverage were excluded due to their collinearity with MCV1. Models in count space (as opposed to rate space) had lower out-of-sample root mean squared error (RMSE) and were thus chosen as final models for these countries.

## Natural history model

To inform the natural history model, we used data from the following sources: World Health Organization (WHO) case notifications from 1995 to 2017 (most recently released in June 2018); additional case notification sources identified by collaborators (eg, Japan and USA subnational surveillance); vital registration (VR) data in countries with well-defined vital registration data; and case fatality data identified through systematic literature reviews. Studies were included in the literature review if they reported case fatality rate, number of deaths, and number of cases. Studies were excluded if they were conducted on non-representative samples.

Measles mortality in the non-data-rich countries was modelled using a natural-history-based model.

First, we modelled measles incidence with a mixed-effects linear regression of case notifications from WHO (1995–2017) on both doses of routine measles vaccination rates (MCV1 and MCV2) and supplementary immunization activity (SIA) coverage using the following equation:

$$Y_{ij} = \beta_0 + \beta_1 MCV1_{ij} + \beta_2 MCV2_{ij} + \beta_{a3} SIA_{aij} + u_j + e_{ij},$$

where  $Y_{ij}$  is the log-transformed incidence rate (in cases per 100,000 persons using WHO case notifications and GBD populations);  $\beta_0$  is the fixed-effect intercept;  $\beta_1$ ,  $\beta_2$ , and  $\beta_{a3}$  are the fixed-effects slopes on the log-transformed proportion of population without the MCV1 vaccine, log-transformed proportion of population without the MCV2 vaccine, and supplementary vaccination coverage (administered doses over the target population of all under-15s) lagged by  $a=1-5$  years, respectively;  $u_j$  is the super-region, region, and country-level random effects;  $e_{ij}$  is the residual;  $i$  is the year; and  $j$  is the location.

The results of this mixed effects regression model were then used to predict location-year-specific incidence as a function of routine vaccine coverage and SIAs. To correct for underreporting in case notifications, we added the effect of a 95% attack rate, assumed to be the same across all unvaccinated populations. Uncertainty was estimated by taking 1,000 iterations of the predictions based on the variance-covariance matrix. For locations in three super-regions – high-income, Central Europe/Eastern Europe/Central Asia and Latin America and Caribbean – we used reported measles cases as incident cases. More information on this part of the natural history model can be found in the non-fatal methods appendix for this round of the GBD.

Second, measles case fatality ratio was modelled using a mixed effects negative binomial regression using the Socio-demographic Index (SDI) as a country covariate and three indicators (hospital-based or not; outbreak or not; and rural or urban/mixed) as study-level covariates, with country random effects:

$$Y_{ij} = \beta_0 + \beta_1 SDI_{ij} + \beta_2 hospital_{ij} + \beta_3 outbreak_{ij} + \beta_4 rural_{ij} + u_j + e_{ij},$$

where  $Y_{ij}$  is the number of deaths (using measles cases as the offset term);  $\beta_0$  is the fixed-effect intercept;  $\beta_1$ ,  $\beta_2$ ,  $\beta_3$ , and  $\beta_4$  are the fixed-effects slopes on the Socio-demographic Index (SDI) and hospital, outbreak, and rurality study-level covariates;  $u_j$  is country-level random effects;  $e_{ij}$  is the residual;  $i$  is the year; and  $j$  is the location. Uncertainty was estimated by taking 1,000 iterations of the predictions based on the variance-covariance matrix and uncertainty in country random effects. The fit of the model was evaluated using diagnostic plots of predicted versus observed values.

Finally, estimated deaths were calculated at the 1,000-draw level from the two sets of custom model predictions as:

$$deaths = incident\ cases * CFR .$$

We estimated overall number of deaths and then assigned an age-sex distribution based on the global-level age- and sex-specific patterns found in the cause of death data.

# Varicella and Herpes Zoster

## Model flowchart

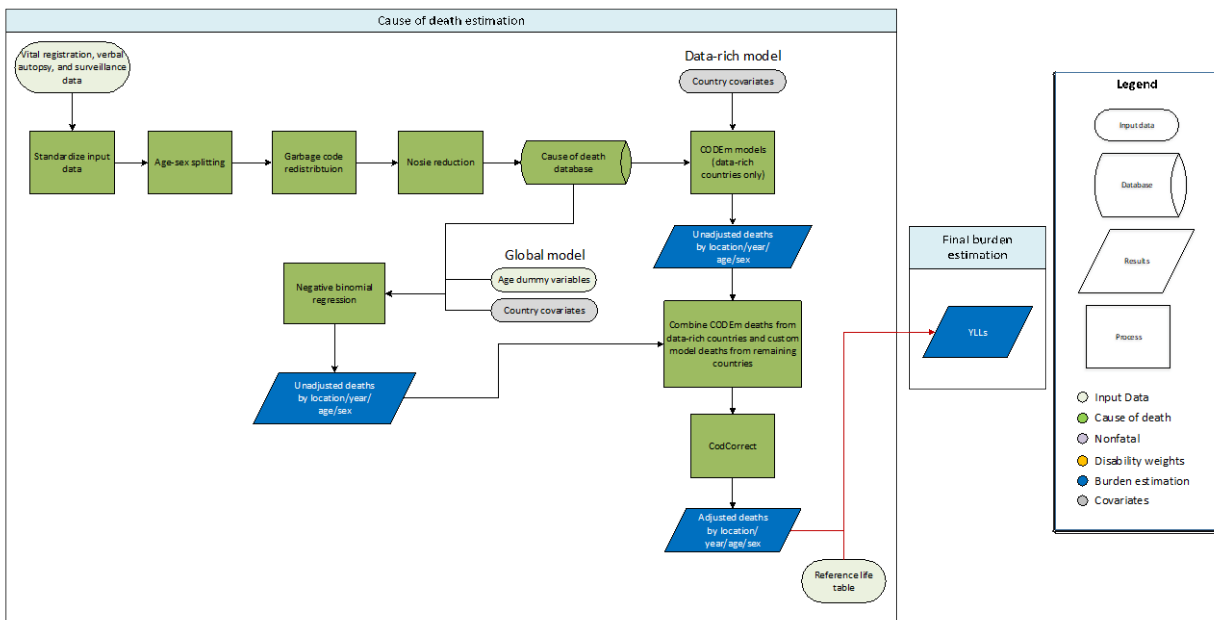

## Modelling strategy overview

We implemented two separate methods for modelling varicella and herpes zoster mortality based on the quality of available vital registration data. For countries with well-defined vital registration (ie, “data-rich” countries), we used a cause of death ensemble model (CODEm) approach. For the remaining countries, we used a custom count model approach.

### Data-rich countries

For data-rich countries, we used a CODEm strategy in count space to model vital registration (VR) data through time using the following country covariates:

| Level | Covariate                                 | Direction |
|-------|-------------------------------------------|-----------|
| 1     | Health systems access (capped)            | 0         |
|       | Healthcare access and quality (HAQ) index | 0         |
|       | Malnutrition (proportion under 2SD)       | +         |
| 3     | Lagged-distributed income (LDI)           | 0         |
|       | Socio-demographic Index (SDI)             | 0         |

Models in count space had lower out-of-sample root mean squared error (RMSE) than rate-space models and were thus chosen as final models for these data-rich countries.

### Custom count model

Since CODEm did not predict well in data-sparse areas, we used a custom model in count-space for countries without well-defined vital registration data. Vital registration, verbal autopsy, and surveillance

data from the cause of death database were used. Data with very high cause fractions (those greater than the 99th percentile values) were excluded in the negative binomial regression.

We used a negative binomial regression to model varicella mortality. Using the input data mentioned above, we modelled counts of deaths due to varicella using the healthcare access and quality (HAQ) index and age dummy variables with the offset set to the location- year- age- and sex-specific populations:

$$Y_{ij} = \beta_0 + \beta_1 HAQ_{ij} + age_{a ij} + e_{ij},$$

where  $Y_{ij}$  is the log-transformed cause fraction,  $\beta_0$  is the fixed-effect intercept,  $\beta_1$  is the fixed-effects slope on HAQ,  $age_{a ij}$  is the dummy variable for each GBD age group in the estimation,  $e_{ij}$  is the residual,  $i$  is the year, and  $j$  is the location. Uncertainty was estimated by taking 1,000 iterations of the predictions based on the variance-covariance matrix and a random sample of the dispersion parameter from a gamma distribution.



# Acute Hepatitis: Total and Virus-Specific

## Overall estimation strategy:

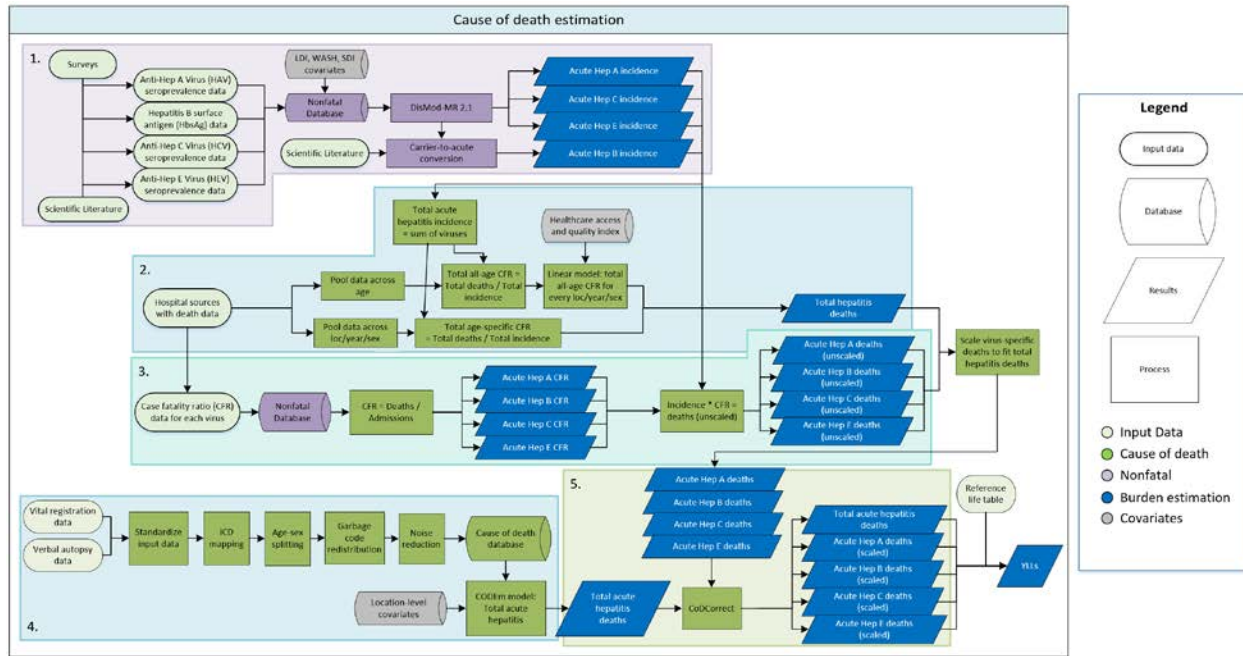

Virus-specific CoD data for acute hepatitis are inconsistently reported and of questionable accuracy. We therefore use a two-part modelling strategy for acute hepatitis A, B, C, and E. First, we develop a parent acute hepatitis mortality model using CODEm and all acute hepatitis mortality data within the CoD database (Part 4 above). Second, we develop four separate natural history models to estimate deaths from acute hepatitis A, B, C, and E (Parts 1–3). Finally, we rescale the virus-specific death estimates from the four natural history models to fit within the envelope defined by the parent acute hepatitis CoD model (Part 5).

Starting in GBD 2017, the virus-specific mortality modelling has changed in a few key ways. In GBD 2016, virus-specific case fatality ratio (CFR) was derived by calculating in-hospital case fatality ratio from Brazil hospital data and using published all-age population CFR from scientific literature to rescale the in-hospital CFR age pattern to a population CFR age pattern. Population CFR was multiplied by incidence to derive virus-specific deaths. The population CFR was specific to virus and age, but not location or year. In GBD 2017, we introduce a location- and year-specific CFR, which is then used to calculate virus-specific proportions of deaths as before.

Our new approach to calculating CFR is shown in parts two and three of the flowchart. We expanded the hospital data from Brazil to include 16 additional countries, and calculated virus-specific and age-specific CFR from this dataset by dividing deaths by admissions according to ICD code. Aggregating hospital deaths for all hepatitis ICD codes and dividing deaths by incidence from the non-fatal hepatitis models, we also modelled total hepatitis all-age CFR as a function of the healthcare access and quality (HAQ) index, thus deriving a location- and year-specific CFR. Aggregating hospital deaths across location, year, and sex in a separate step allowed us to calculate an age pattern for total hepatitis CFR, which was then

applied to the all-age CFR. The total hepatitis age-specific CFR was then multiplied by total incidence to get total deaths, and the virus-specific deaths were rescaled to fit within the total deaths envelope.

## Total hepatitis

### Input data

We modelled total hepatitis mortality using all available data in the cause of death database. Data points were outliered if they reported an improbable number of hepatitis deaths or if their inclusion in the model yielded distorted trends. In some cases, multiple data sources for the same location differed dramatically both in their quality and reported hepatitis mortality (eg, a verbal autopsy and vital registration source). In these cases, the lower-quality data source was outliered.

### Modelling strategy

We modelled hepatitis mortality using a two-model hybrid approach: 1) a global CODEm model of all locations, using all data in the CoD database; and 2) a CODEm model restricted to data-rich countries. This model is represented as part four in the diagram above. Some covariates were changed in GBD 2017. We introduced a new covariate of hepatitis B vaccination, switched from an older measure of health system access to the healthcare access and quality index, and switched from proportion of unsafe water and unsafe sanitation to summary exposure values (SEV) of unsafe water and unsafe sanitation. The full covariate list is included below:

| Level | Covariate                                                     | Direction | Transformation |
|-------|---------------------------------------------------------------|-----------|----------------|
| 1     | SEV scalar (hepatitis)                                        | +         |                |
|       | Seroprevalence (HBsAg)                                        | +         |                |
|       | Seroprevalence (anti-HCV)                                     | +         |                |
|       | Seroprevalence (anti-HAV)                                     | +         |                |
|       | Seroprevalence (anti-HEV)                                     | +         |                |
| 2     | HAQ index                                                     | -         |                |
|       | SEV unsafe sanitation                                         | +         |                |
|       | SEV unsafe water                                              | +         |                |
|       | Socio-demographic Index                                       | -         |                |
|       | Hep B vaccine coverage (1 and 3 doses) proportion aged cohort | -         |                |
| 3     | Education (years per capita)                                  | -         |                |
|       | LDI                                                           | -         | LN             |

## Acute hepatitis A

### Input data

We use anti-HAV seroprevalence data from population-based studies and surveys for the incidence model.

### Modelling strategy

As outlined above, the hepatitis A model produces a proportion which is applied to the total hepatitis deaths. We estimate acute hepatitis A deaths as the product of our non-fatal incidence estimates and the case fatality rate:

$$Acute\ deaths = Acute\ incidence * \beta$$

Where:

$$\beta = Case\ fatality\ rate$$

Case fatality rate is derived by dividing the number of deaths due to acute hepatitis A by number of admissions (based on hospital data). This approach to calculating case fatality rate is a change from GBD 2016 (described in more detail in the introductory section on the overall modelling strategy). In GBD 2016, we used published estimates of acute hepatitis A case fatality [Rein et al, 2007<sup>1</sup>], sampling from a beta distribution to propagate uncertainty.

We model the prevalence of hepatitis A using a full DisMod model of anti-HAV seroprevalence. Given its reasonably stable force of infection among susceptible people across age groups, we derive incidence from the prevalence estimates using the following formula:

$$incid = \frac{-\ln(1 - prev)}{age_{mid}} * (1 - prev)$$

This approach is a modification from GBD 2016, where we used a binomial generalised linear model with a complementary log-log link, and an offset term for log-age. That previous model used a predictive covariate derived from principal components analysis of lag-distributed income (LDI) and the proportion of the population with access to improved water.

## Acute hepatitis B

### Input data

We use hepatitis B surface antigen (HBsAg) seroprevalence data from population-based studies and surveys for the incidence model.

### Modelling strategy

As outlined above, the hepatitis B model produces a proportion which is applied to the total hepatitis deaths. We estimate acute hepatitis B deaths as the product of our non-fatal incidence estimates and the case fatality rate:

$$Acute\ deaths = Acute\ incidence * \beta$$

Where:

$$\beta = Case\ fatality\ rate$$

Case fatality rate is derived by dividing the number of deaths due to acute hepatitis B by number of admissions (based on hospital data). This approach to calculating case fatality rate is a change from GBD 2016 (described in more detail in the introductory section on the overall modelling strategy). In GBD

2016, we used published estimates of acute hepatitis B case fatality [Bianco et al 2003<sup>2</sup>], sampling from a beta distribution to propagate uncertainty.

We model the incidence of chronic HBsAg carriage using a full DisMod model of HBsAg seroprevalence. We then convert incidence of chronic carriage to total incidence of hepatitis B infection by dividing age-specific estimates of the incidence of chronic carriage by age-specific estimates of the probability of infection resulting in carriage from Edmunds et al 1993<sup>3</sup>. We then multiply incident infection estimates by estimates of probability of acute incidence, derived from cases in McMahon et al 1997<sup>4</sup> and sampling from a beta distribution to propagate uncertainty.

$$\begin{aligned} \text{Incident infection} &= \frac{\text{Chronic carriage}}{\beta_1} \\ \text{Incident acute infection} &= \text{Incidence infection} * \beta_2 \end{aligned}$$

Where:

$\beta_1 = \text{Probability of chronic infection}$

$\beta_2 = \text{Probability of acute infection}$

## Acute hepatitis C

### Input data

We use anti-HCV seroprevalence data from population-based studies and surveys for the incidence model.

### Modelling strategy

As outlined above, the hepatitis C model produces a proportion which is applied to the total hepatitis deaths. We estimate acute hepatitis C deaths as the product of our non-fatal incidence estimates and the case fatality rate:

$$\text{Acute deaths} = \text{Acute incidence} * \beta$$

Where:

$\beta = \text{Case fatality rate}$

Case fatality rate is derived by dividing the number of deaths due to acute hepatitis C by number of admissions (based on hospital data). This approach to calculating case fatality rate is a change from GBD 2016 (described in more detail in the introductory section on the overall modelling strategy). In GBD 2016, we used published estimates of acute hepatitis C case fatality [Stroffolini et al 1997<sup>5</sup>], sampling from a beta distribution to propagate uncertainty.

We model the incidence of hepatitis C using a full DisMod model of anti-HCV seroprevalence.

## Acute hepatitis E

## Input data

We use anti-HEV seroprevalence data from population-based studies and surveys for the incidence model.

## Modelling strategy

As outlined above, the hepatitis E model produces a proportion which is applied to the total hepatitis deaths. We estimate acute hepatitis E deaths as the product of our non-fatal incidence estimates and the case fatality rate:

$$\textit{Acute deaths} = \textit{Acute incidence} * \beta$$

Where:

$$\beta = \textit{Case fatality rate}$$

Case fatality rate is derived by dividing the number of deaths due to acute hepatitis E by number of admissions (based on hospital data). This approach to calculating case fatality rate is a change from GBD 2016 (described in more detail in the introductory section on the overall modelling strategy). In GBD 2016, we used published estimates of acute hepatitis E case fatality [Rein et al, 2012<sup>6</sup>], sampling from a beta distribution to propagate uncertainty.

We model the incidence of hepatitis E using a full DisMod model of anti-HEV seroprevalence.

## Reference

1. Rein DB, Hicks KA, Wirth KE, Billah K, Finelli L, Fiore AE, et al. Cost-effectiveness of routine childhood vaccination for hepatitis a in the United States. *Pediatrics*. 2007;119:e12–21.
2. Bianco, E., et al. Case fatality rate of acute viral hepatitis in Italy: 1995–2000. An update. *Digestive and liver disease* 35.6 (2003): 404-408.
3. Stroffolini, T., et al. Prevalence, risk factors, and genotype distribution of hepatitis C virus infection in the general population: a community-based survey in southern Italy. *Hepatology* 26.4 (1997): 1006-1011.
4. Edmunds, W. J., et al. The influence of age on the development of the hepatitis B carrier state. *Proceedings of the Royal Society of London B: Biological Sciences* 253.1337 (1993): 197-201.
5. McMahon, Brian J. Epidemiology and natural history of hepatitis B. *Seminars in liver disease*. Vol. 25. No. S 1. Published in 2005 by Thieme Medical Publishers, Inc., 333 Seventh Avenue, New York, NY 10001, USA., 2005.
6. Rein DB, Stevens GA, Theaker J, Wittenborn JS, Wiersma ST. The global burden of hepatitis E virus genotypes 1 and 2 in 2005. *Hepatology* 2012; 55: 988–97.

## Other Unspecified Infectious Diseases

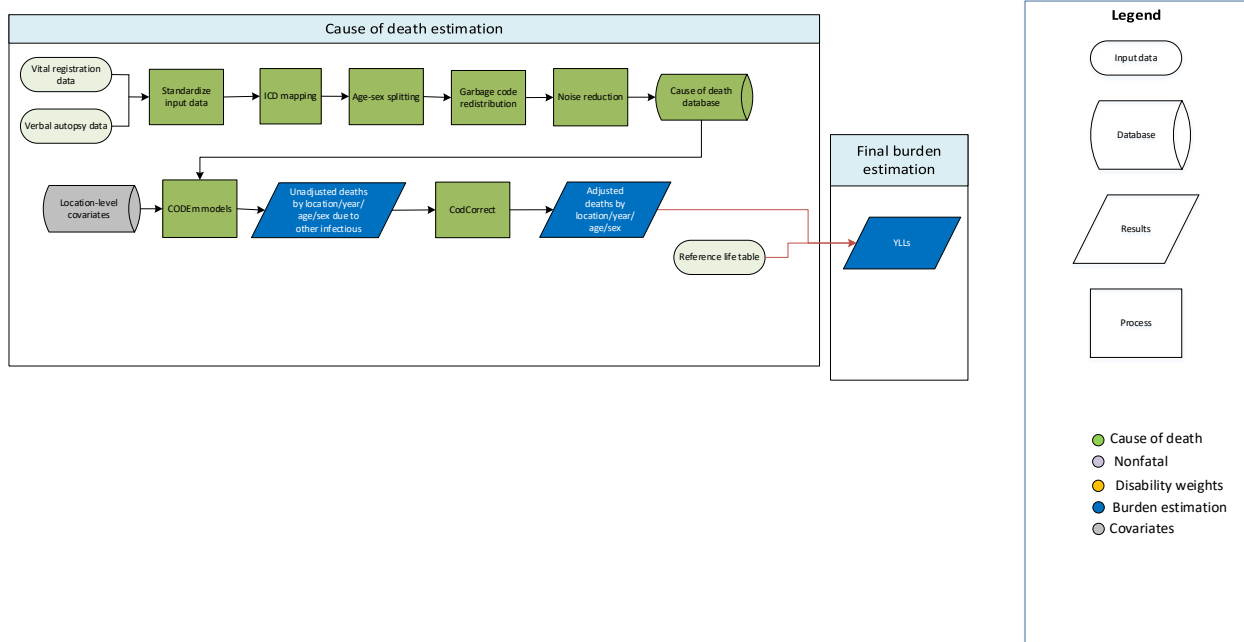

### Input data

We modelled other infectious disease mortality using all available data in the cause of death database. Data points were outliered if they reported an improbable number of deaths or if their inclusion in the model yielded distorted trends. In some cases multiple data sources for the same location differed dramatically both in their quality and reported other infectious diseases mortality (eg, a verbal autopsy and vital registration source). In these cases the lower-quality data source was outliered.

### Modelling strategy

We modeled other unspecified infectious disease mortality using a two-model hybrid approach: 1) a global CODEm model of all locations, using all data in the CoD database; and 2) a CODEm model restricted to data-rich countries.

The covariates used in the model include:

| Covariate name           | Level | Direction |
|--------------------------|-------|-----------|
| ANC proportion           | 2     | -         |
| DPT3 coverage            | 1     | -         |
| Education                | 3     | -         |
| Health system access     | 1     | -         |
| Underweight              | 2     | +         |
| Measles vaccine coverage | 1     | -         |
| Sanitation proportion    | 2     | -         |
| Clear water proportion   | 2     | -         |

|                         |   |   |
|-------------------------|---|---|
| Socio-demographic Index | 3 | - |
|-------------------------|---|---|

We have made no substantive changes to the modelling strategy since GBD 2016.

## Maternal disorders

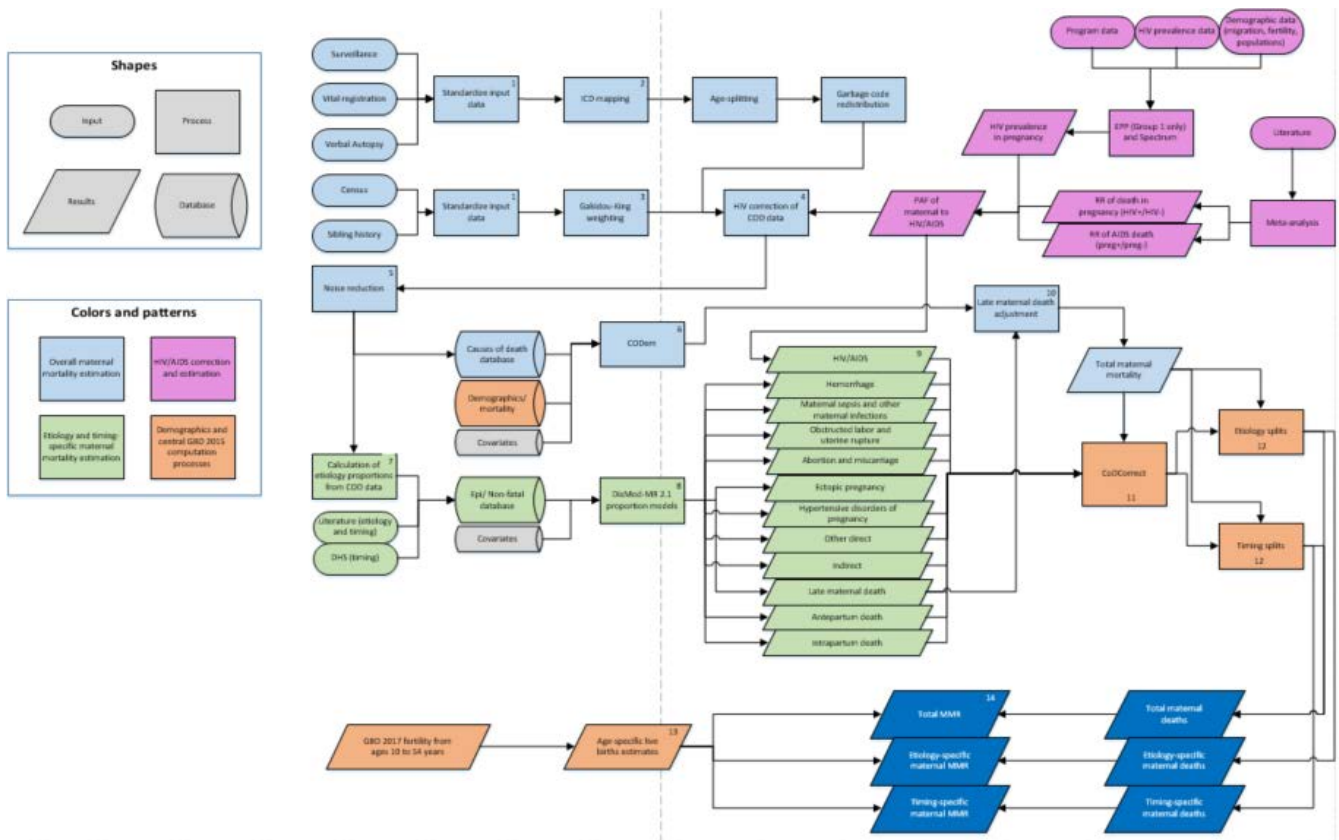

### Input data

CODEm models were informed by centrally prepped data stored in the cause of death (COD) database. All data were corrected for incidental HIV deaths. Spectrum outputs of HIV prevalence in pregnancy were combined with relative risk of mortality during pregnancy (HIV-positive versus HIV-negative) to calculate population attributable fractions (PAFs). A proportion of these deaths are incidental and a proportion are maternal. PAFs were applied to all sibling history and census data to remove incidental HIV deaths. We performed an updated literature review to search for new scientific articles reporting data on maternal mortality, morbidity, and relative risk of mortality in pregnancy in HIV-positive versus HIV-negative women. We completed this search on July 20, 2017, using the following search string:

```
( ((( ( "Postpartum Hemorrhage" OR "Uterine Hemorrhage" ) OR ( maternal[Title/Abstract] OR pregnant[Title/Abstract] OR pregnancy[Title/Abstract] OR mothers ) AND ( haemorrhag*[Title/Abstract] OR hemorrhag*[Title/Abstract] ) NOT "case report"[All fields] ) OR ( ( "induced abortion" OR "Therapeutic abortion" OR "legal Abortion" OR "medical abortion" OR "miscarriage" OR "Abortion, Induced"[Mesh] OR "Abortion, Therapeutic"[Mesh] OR "Abortion, Legal"[Mesh] OR "ectopic Pregnancy" ) NOT ( "case report"[Title/Abstract] OR "birth defect"[Title/Abstract] OR congenital[Title/Abstract] ) ) OR ( "obstructed labour" OR "obstructed labor" OR "labour dystocia" OR "labor dystocia" OR dystocia OR "cephalopelvic disproportion" OR "cephalo-pelvic disproportion" ) OR ( ( "obstetric fistula" OR "vesicovaginal fistula" ) OR "rectovaginal fistula" ) OR ( ( "Puerperal Infection"[Mesh] OR "Puerperal Infection" OR ( maternal[Title/Abstract] OR pregnant[Title/Abstract] OR pregnancy[Title/Abstract] ) AND ( Sepsis OR infection[Title/Abstract] ) ) ) NOT "case report" ) OR ( (Pre-Eclampsia[Title/Abstract] OR
```



preeclampsia[Title/Abstract] OR Eclampsia[Title/Abstract] OR Pre-Eclampsia[Mesh] OR Eclampsia[Mesh]
 OR "Hypertension, Pregnancy-Induced"[Mesh] OR "pregnancy induced hypertension"[Title/Abstract] OR
 "gestational hypertension"[Title/Abstract] OR "Hypertensive disorders of pregnancy"[Title/Abstract]
 NOT ("case report" OR "kidney don\*" [Title/Abstract] OR polymorphism\* [Title/Abstract] OR
 endotheli\* [Title/Abstract] ) ) AND ( 2016/08/01[PDat] : 2017/12/31[PDat] ) NOT ( animals[MeSH] NOT
 humans[MeSH] ))) OR ((( ( ( "maternal mortality"[Title/Abstract] OR "maternal death"[Title/Abstract]
 OR "MM"[Title/Abstract] OR "confidential enquiry"[Title/Abstract] OR ( ( obstetric[Title/Abstract] OR
 pregnancy[Title/Abstract] ) AND (etiology[Title/Abstract] OR cause[Title/Abstract] or
 pattern[Title/Abstract] ) AND ( death[Title/Abstract] OR mortality[Title/Abstract] ) ) ) ) NOT (
 fetal[Title/Abstract] OR newborns[Title/Abstract] OR newborn[Title/Abstract] OR
 neonatal[Title/Abstract] OR "case report"[Title/Abstract] OR "case study"[Title/Abstract] OR
 pathogenesis[Title/Abstract] OR thromboprophylaxis[Title/Abstract] ) ) NOT ( animals[MeSH] NOT
 humans[MeSH] ) OR ( ( ("maternal mortality"[Title/Abstract] OR "maternal death\*" [Title/Abstract] OR
 "MMR"[Title/Abstract] ) AND ( "Afghanistan"[Title/Abstract] OR "Albania"[Title/Abstract] OR
 "Algeria"[Title/Abstract] OR "Andorra"[Title/Abstract] OR "Angola"[Title/Abstract] OR "Antigua and
 Barbuda"[Title/Abstract] OR "Argentina"[Title/Abstract] OR "Armenia"[Title/Abstract] OR
 "Azerbaijan"[Title/Abstract] OR "Bahrain"[Title/Abstract] OR "Bangladesh"[Title/Abstract] OR
 "Barbados"[Title/Abstract] OR "Belarus"[Title/Abstract] OR "Belize"[Title/Abstract] OR
 "Benin"[Title/Abstract] OR "Bhutan"[Title/Abstract] OR "Bolivia"[Title/Abstract] OR "Bosnia and
 Herzegovina"[Title/Abstract] OR "Botswana"[Title/Abstract] OR "Brazil"[Title/Abstract] OR
 "Brunei"[Title/Abstract] OR "Bulgaria"[Title/Abstract] OR "Burkina Faso"[Title/Abstract] OR
 "Burundi"[Title/Abstract] OR "Cambodia"[Title/Abstract] OR "Cameroon"[Title/Abstract] OR "Cape
 Verde"[Title/Abstract] OR "Central African Republic"[Title/Abstract] OR "Chad"[Title/Abstract] OR
 "China"[Title/Abstract] OR "Colombia"[Title/Abstract] OR "Comoros"[Title/Abstract] OR
 "Congo"[Title/Abstract] OR "Costa Rica"[Title/Abstract] OR "Croatia"[Title/Abstract] OR
 "Cuba"[Title/Abstract] OR "Cyprus"[Title/Abstract] OR "Côte d'Ivoire"[Title/Abstract] OR "Democratic
 Republic of the Congo"[Title/Abstract] OR "Djibouti"[Title/Abstract] OR "Dominica"[Title/Abstract] OR
 "Dominican Republic"[Title/Abstract] OR "Ecuador"[Title/Abstract] OR "Egypt"[Title/Abstract] OR "El
 Salvador"[Title/Abstract] OR "Equatorial Guinea"[Title/Abstract] OR "Eritrea"[Title/Abstract] OR
 "Ethiopia"[Title/Abstract] OR "Federated States of Micronesia"[Title/Abstract] OR "Fiji"[Title/Abstract]
 OR "Gabon"[Title/Abstract] OR "Georgia"[Title/Abstract] OR "Ghana"[Title/Abstract] OR
 "Grenada"[Title/Abstract] OR "Guatemala"[Title/Abstract] OR "Guinea"[Title/Abstract] OR "Guinea-
 Bissau"[Title/Abstract] OR "Guyana"[Title/Abstract] OR "Haiti"[Title/Abstract] OR
 "Honduras"[Title/Abstract] OR "India"[Title/Abstract] OR "Indonesia"[Title/Abstract] OR
 "Iran"[Title/Abstract] OR "Iraq"[Title/Abstract] OR "Jamaica"[Title/Abstract] OR "Jordan"[Title/Abstract]
 OR "Kazakhstan"[Title/Abstract] OR "Kenya"[Title/Abstract] OR "Kiribati"[Title/Abstract] OR
 "Kuwait"[Title/Abstract] OR "Kyrgyzstan"[Title/Abstract] OR "Laos"[Title/Abstract] OR
 "Latvia"[Title/Abstract] OR "Lebanon"[Title/Abstract] OR "Lesotho"[Title/Abstract] OR
 "Liberia"[Title/Abstract] OR "Libya"[Title/Abstract] OR "Lithuania"[Title/Abstract] OR
 "Macedonia"[Title/Abstract] OR "Madagascar"[Title/Abstract] OR "Malawi"[Title/Abstract] OR
 "Malaysia"[Title/Abstract] OR "Maldives"[Title/Abstract] OR "Mali"[Title/Abstract] OR
 "Malta"[Title/Abstract] OR "Marshall Islands"[Title/Abstract] OR "Mauritania"[Title/Abstract] OR
 "Mauritius"[Title/Abstract] OR "Moldova"[Title/Abstract] OR "Mongolia"[Title/Abstract] OR
 "Montenegro"[Title/Abstract] OR "Morocco"[Title/Abstract] OR "Mozambique"[Title/Abstract] OR

“Myanmar”[Title/Abstract] OR “Namibia”[Title/Abstract] OR “Nepal”[Title/Abstract] OR  
 “Nicaragua”[Title/Abstract] OR “Niger”[Title/Abstract] OR “Nigeria”[Title/Abstract] OR “North  
 Korea”[Title/Abstract] OR “Oman”[Title/Abstract] OR “Pakistan”[Title/Abstract] OR  
 “Palestine”[Title/Abstract] OR “Panama”[Title/Abstract] OR “Papua New Guinea”[Title/Abstract] OR  
 “Paraguay”[Title/Abstract] OR “Peru”[Title/Abstract] OR “Philippines”[Title/Abstract] OR  
 “Qatar”[Title/Abstract] OR “Romania”[Title/Abstract] OR “Russia”[Title/Abstract] OR  
 “Rwanda”[Title/Abstract] OR “Saint Lucia”[Title/Abstract] OR “Saint Vincent and the  
 Grenadines”[Title/Abstract] OR “Samoa”[Title/Abstract] OR “Saudi Arabia”[Title/Abstract] OR  
 “Senegal”[Title/Abstract] OR “Serbia”[Title/Abstract] OR “Seychelles”[Title/Abstract] OR “Sierra  
 Leone”[Title/Abstract] OR “Singapore”[Title/Abstract] OR “Solomon Islands”[Title/Abstract] OR  
 “Somalia”[Title/Abstract] OR “South Africa”[Title/Abstract] OR “South Sudan”[Title/Abstract] OR “Sri  
 Lanka”[Title/Abstract] OR “Sudan”[Title/Abstract] OR “Suriname”[Title/Abstract] OR  
 “Swaziland”[Title/Abstract] OR “Syria”[Title/Abstract] OR “São Tomé and Príncipe”[Title/Abstract] OR  
 “Taiwan”[Title/Abstract] OR “Tajikistan”[Title/Abstract] OR “Tanzania”[Title/Abstract] OR  
 “Thailand”[Title/Abstract] OR “The Bahamas”[Title/Abstract] OR “The Gambia”[Title/Abstract] OR  
 “Timor-Leste”[Title/Abstract] OR “Togo”[Title/Abstract] OR “Tonga”[Title/Abstract] OR “Trinidad and  
 Tobago”[Title/Abstract] OR “Tunisia”[Title/Abstract] OR “Turkmenistan”[Title/Abstract] OR  
 “Uganda”[Title/Abstract] OR “Ukraine”[Title/Abstract] OR “United Arab Emirates”[Title/Abstract] OR  
 “Uruguay”[Title/Abstract] OR “Uzbekistan”[Title/Abstract] OR “Vanuatu”[Title/Abstract] OR  
 “Venezuela”[Title/Abstract] OR “Vietnam”[Title/Abstract] OR “Yemen”[Title/Abstract] OR  
 “Zambia”[Title/Abstract] OR “Zimbabwe”[Title/Abstract]) NOT ( animals[MeSH] NOT humans[MeSH] )  
 NOT ( “demographic and health survey\*”[Title/Abstract] OR DHS[Title/Abstract] OR “reproductive  
 health survey\*”[Title/Abstract] OR RHS[Title/Abstract] ) ) AND ( 2016/08/15[PDat] : 2017/12/31[PDat] )  
 ))) ) OR ( ( HIV[Title/Abstract] OR “Acquired Immunodeficiency Syndrome”[Title/Abstract] OR  
 AIDS[Title/Abstract] ) AND ( “pregnant”[Title/Abstract] OR “pregnancy”[Title/Abstract] OR  
 “postpartum”[Title/Abstract] OR “post partum”[Title/Abstract] ) AND ( “mortality”[Title/Abstract] OR  
 “death”[Title/Abstract] ) NOT “case report” NOT ( animals[MeSH] NOT humans[MeSH] ) AND  
 ( 2016/08/15[PDat] : 2017/12/31[PDat] ) ) )

All data from all geographies were reviewed in CODEm models. Outliers were identified as those data where age patterns or temporal patterns were inconsistent with neighbouring age groups or locations or where sparse data were predicting implausible overall temporal or age patterns for a given location.

We used scientific literature data identified through the search string above to inform DisMod-MR 2.1 aetiology proportion models as well as data from the COD database.

A total of 6,554 literature sources were reviewed for their title and abstract. Of those selected for full text review, 41 of them were extracted to inform maternal disorder models (fatal and non-fatal). All cause-specific maternal mortality data were prepped as “proportion” of total maternal deaths due to that cause. Because many sources do not include the entire cause list, a series of study covariates were used to facilitate crosswalking back to the reference definition. The reference definition *includes* “other” direct obstetric complications, indirect maternal deaths, and late maternal death. All aetiology-specific COD data were processed to be “proportion” data by calculating the cause-specific deaths divided by the total maternal deaths for the matching data source, year, age, and location. Late maternal death

data were only included for the subset of locations where they were reliably coded in raw VR. All data were uploaded to the non-fatal database.

### Modelling strategy

Overall maternal mortality was estimated with CODEm. Covariates included in this model and their level and directionality are show in the table below:

| Level   | Covariate                                                           | Direction |
|---------|---------------------------------------------------------------------|-----------|
| Level 1 | Age-specific fertility rate                                         | +         |
|         | Total fertility rate (log-transformed)                              | +         |
|         | Maternal education (years per capita)                               | -         |
|         | In-facility delivery (proportion)                                   | -         |
|         | Skilled birth attendance (proportion)                               | -         |
|         | Neonatal mortality ratio (log-transformed)                          | +         |
|         | Age-specific HIV mortality in females 10-54 (log-transformed)       | +         |
| Level 2 | Antenatal care 1-visit coverage (proportion)                        | -         |
|         | Antenatal care 4-visits coverage (proportion)                       | -         |
|         | Age-standardised wasting (weight-for-height) summary exposure value | +         |
|         | Age-standardised stunting (height-for-age) summary exposure value   | +         |
|         | Healthcare access and quality index                                 | -         |
|         | Prevalence of obesity                                               | +         |
| Level 3 | Socio-demographic Index                                             | +         |
|         | Mortality shock (cumulative rate in last 10 years)                  | -         |
|         | LDI (log-transformed)                                               | +         |
|         | Hospital beds (per 1,000 population)                                | -         |
|         |                                                                     | -         |

We used STGPR to estimate MMRs for each of the eight maternal subcauses. This modeling strategy requires data to be in standard GBD age groups. To achieve this, we used the age pattern of the COD data for each cause and applied it to the literature data that were not in the standard GBD age groups.

STGPR also requires variance for each data point. In order to compute variance we ran a Lowess regression on the data by year and used the variance of the residuals resulting from the difference between the data and the predicted values.

Country covariates were specific for each model and included abortion legality (for abortion and miscarriage as well as ectopic pregnancy), log-transformed lag-distributed income (other maternal deaths, and indirect maternal deaths), unsafe sanitation summary exposure value (for maternal sepsis and other maternal infections), Socio-demographic Index (for late maternal deaths), logit-transformed in-facility delivery proportion (for haemorrhage), mean systolic blood pressure (for hypertensive disorders of pregnancy), and age-specific underweight women (for obstructed labour).

Aetiology-specific estimates were derived by scaling the results from the STGPR subcause-specific models scaled in relation to each other to equal one and then multiplying them by the total maternal deaths, corrected for late maternal deaths, for that age group, location, and year. HIV-related maternal deaths were estimated for all locations using the PAF approach described above for mortality data processing. Incidental HIV deaths during pregnancy were by definition excluded.

## Neonatal Disorders

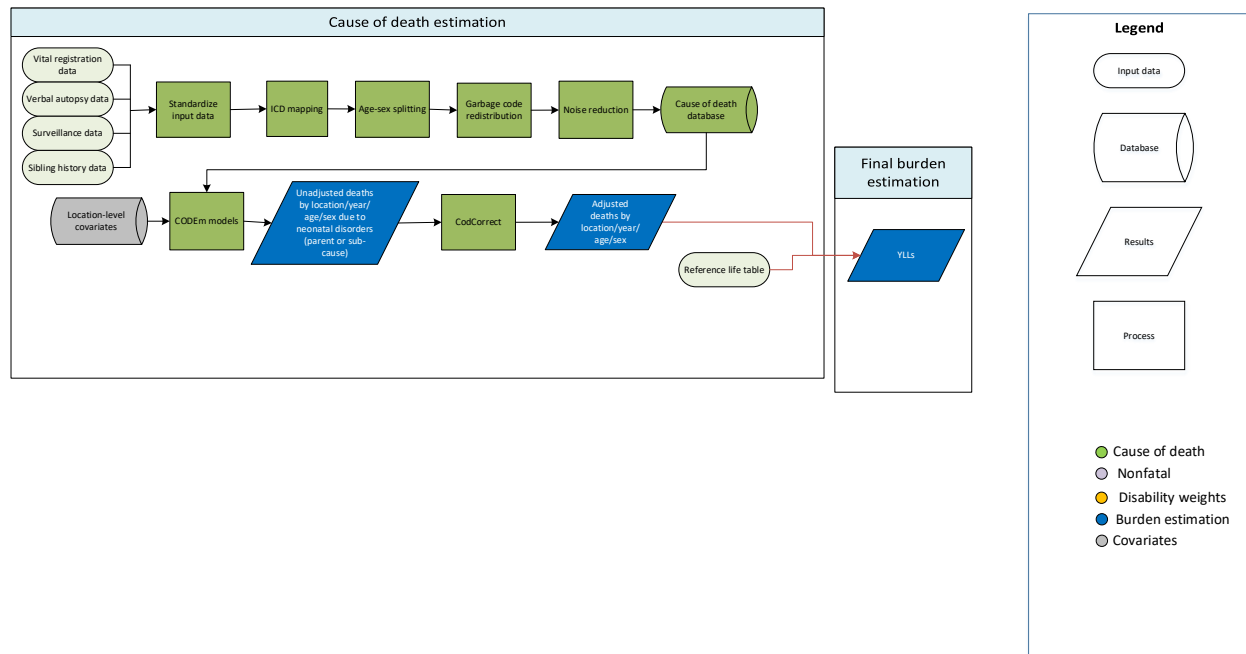

### Input data

Mortality for five causes are modeled within “neonatal disorders”: preterm birth complications, neonatal encephalopathy and birth trauma, neonatal sepsis and other infections, hemolytic disease and neonatal jaundice, and other neonatal disorders. An overall neonatal disorders “parent” envelope is also estimated, to which all neonatal causes are squeezed.

For the neonatal disorders envelope, preterm birth complications, neonatal encephalopathy and birth trauma, neonatal sepsis and other infections, hemolytic disease and neonatal jaundice, and other neonatal disorders, vital registration and surveillance were the majority of data sources used for GBD 2017 to estimate number of deaths from each condition. In Indian states, only verbal autopsy was used to inform estimates. Only deaths among males and females under age 5 were modelled, in four separate age groups: early neonatal period, late neonatal period, post-neonatal period, and 1-4 years. Data points were selected as outliers if they were implausibly high, low, or significantly conflicted with established age or temporal patterns.

### Modelling strategy

For GBD 2017, the standard CODEm modelling approach was used to model each of the neonatal conditions. This same method was employed in GBD 2013, 2015, and 2016.

Varying levels of data quality and coding issues may still have affected our results. Validation studies suggest that verbal autopsy methods tend to be less accurate for cause of death ascertainment in the neonatal age groups.<sup>1-4</sup> Thus, for GBD 2017, except for the Indian states, the majority of verbal autopsy data were excluded.

All neonatal causes used the following pool of covariates in covariate selection:

| Level | Covariate                                          | Direction |
|-------|----------------------------------------------------|-----------|
| 1     | Indoor air pollution (all cooking fuels)           | +         |
|       | Smoking prevalence (reproductive age-standardized) | +         |
| 2     | Antenatal care (4 visits) coverage (proportion)    | -         |
|       | In-facility delivery (proportion)                  | -         |
|       | Live births 35+ (proportion)                       | +         |
|       | Skilled birth attendance (proportion)              | -         |
|       | Health system access (capped)                      | -         |
|       | Healthcare access and quality index                | -         |
| 3     | Age-standardised underweight (weight-for-age) SEV  | +         |
|       | Education (years per capita)                       | -         |
|       | Lag distributed income per capita (\$)             | -         |
|       | Total fertility rate                               | +         |
|       | Socio-demographic Index                            | -         |

## References

- 1 Anker M, Black RE, Coldham C, *et al.* A Standard Verbal Autopsy Method for Investigating Causes of Death in Infants and Children. Geneva, Switzerland: World Health Organization Department of Communicable Disease Surveillance and Response; The Johns Hopkins School of Hygiene and Public Health; The London School of Hygiene and Tropical Medicine, 1999.
- 2 Kalter HD, Gray RH, Black RE, Gultiano SA. Validation of postmortem interviews to ascertain selected causes of death in children. *Int J Epidemiol* 1990; **19**: 380–6.
- 3 Quigley MA, Armstrong Schellenberg JR, Snow RW. Algorithms for verbal autopsies: a validation study in Kenyan children. *Bull World Health Organ* 1996; **74**: 147–54.
- 4 Snow RW, Armstrong JR, Forster D, *et al.* Childhood deaths in Africa: uses and limitations of verbal autopsies. *The Lancet* 1992; **340**: 351–5.

## Nutritional deficiencies: Parent nutritional deficiencies, protein-energy malnutrition, and other nutritional deficiencies

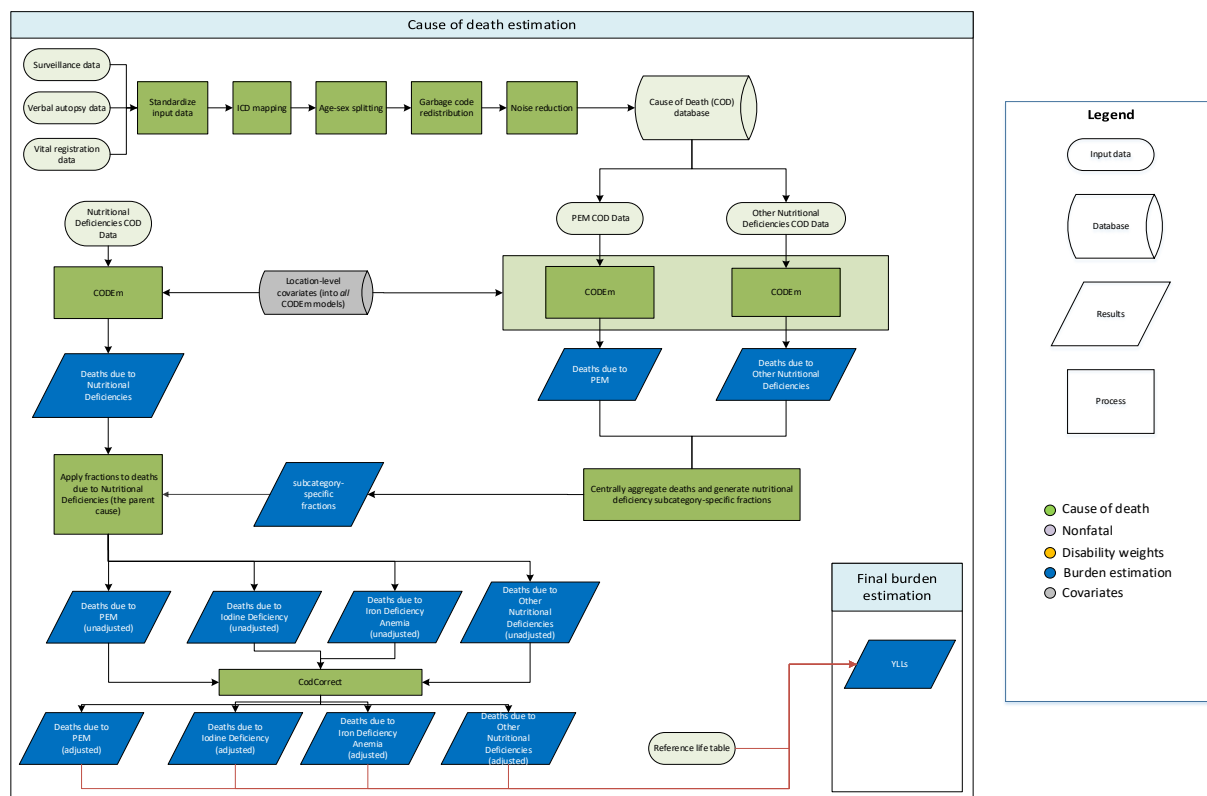

### Input data and case definitions

For GBD 2017, vital registration, verbal autopsy, and surveillance data were used to model deaths due to nutritional deficiencies. As described in other sections, the volume of new data was significant. Notable additions include Sample Registration System (SRS) from states of India and provinces of Indonesia. ICD codes, which can be interpreted as case definitions, for each of the nutritional deficiencies is listed in the table below.

| GBD cause                      | ICD-10 code                                                                                                                                                                             |
|--------------------------------|-----------------------------------------------------------------------------------------------------------------------------------------------------------------------------------------|
| Protein-energy malnutrition    | E40-E46.9 (Kwashiorkor, marasmus, specified and unspecified protein-calorie malnutrition)                                                                                               |
| Other nutritional deficiencies | D51-D52.0 (vitamin B12 deficiency anaemia and folate deficiency anaemia)                                                                                                                |
| Other nutritional deficiencies | D52.8-D53.9 (other nutritional anaemias)                                                                                                                                                |
| Other nutritional deficiencies | D64.3 (other sideroblastic anaemias)                                                                                                                                                    |
| Other nutritional deficiencies | E51-E61.9 (thiamine, niacin, other B group vitamins, ascorbic acid, vitamin D, other vitamin, dietary calcium, dietary selenium, dietary zinc, and other nutrient element deficiencies) |

|                                |                                                                                                                                   |
|--------------------------------|-----------------------------------------------------------------------------------------------------------------------------------|
| Other nutritional deficiencies | E63-E64.0 (other nutritional deficiencies and sequelae of protein-calorie malnutrition)                                           |
| Other nutritional deficiencies | E64.2-E64.9 (sequelae of vitamin C deficiency, rickets, other nutritional deficiencies, and unspecified nutritional deficiencies) |
| Other nutritional deficiencies | M12.1-M12.19 (Kashin-Beck disease)                                                                                                |
| Garbage code                   | D50, D50.0 and D50.9 (unspecified anaemia)                                                                                        |

### Modelling strategy

Other than data and covariate updates, we did not make any modelling strategy changes for GBD 2017. Additionally, iodine deficiency and iron-deficiency anaemia, which were estimated as causes of death in previous GBDs, were changed to non-fatal-only causes for GBD 2017.

We estimated mortality for each of the nutritional deficiencies in two steps. CODEm was first used to generate mortality estimates for total nutritional deficiencies. The sub-categories of nutritional deficiencies, namely protein-energy malnutrition and other nutritional deficiencies, were modelled separately. We assumed zero mortality due to vitamin A deficiency, instead analysing it as a cause of non-fatal disease burden and a risk factor for mortality due to other causes. We outliered data that were largely conflicting with the majority of data from other studies conducted either in the same or different countries (with similar socio-demographic characteristics) in the same region.

CODEm was used to model all sub-categories except for iodine deficiency. The CODEm covariates (including level and direction) used for each of the models are listed in the table below.

| Nutritional deficiencies (overall) |                                                                                                    |           |
|------------------------------------|----------------------------------------------------------------------------------------------------|-----------|
| Level                              | Covariate                                                                                          | Direction |
| 1                                  | Age-standardised prevalence of severe anaemia                                                      | +         |
|                                    | Malnutrition shock mortality rate                                                                  | +         |
|                                    | Proportion of children 0-5 with weight-for-age z-score < -2                                        | +         |
|                                    | Proportion of children 0-5 with weight-for-height z-score < -2                                     | +         |
|                                    | Proportion of households using iodised salt                                                        | -         |
|                                    | Total kcal per person per day availability                                                         | -         |
|                                    | Proportion underweight (<20 yrs: <-2 BMI z-scores; >20 yrs: <17 BMI)                               | +         |
| 2                                  | Population living in the 1 <sup>st</sup> world quintile (least) of annual rainfall                 | +/-       |
|                                    | Population living in the 2 <sup>nd</sup> world quintile (2 <sup>nd</sup> least) of annual rainfall | +/-       |
|                                    | Unsafe sanitation SEV                                                                              | +         |
|                                    | Mortality rate due to war shocks                                                                   | +         |
|                                    | Unsafe water SEV                                                                                   | +         |
|                                    | Health Systems Access Capped                                                                       | -         |
|                                    | Healthcare access and quality index                                                                | +         |
|                                    | Log-transformed SEV scalar: Diarrhoea                                                              | +         |
| Alcohol SEV (age, sex specific)    | +                                                                                                  |           |
| 3                                  | Education (years per capita)                                                                       | -         |
|                                    | Lag distributed income per capita                                                                  | -         |
|                                    | Socio-demographic Index                                                                            | -         |
|                                    | Maternal education (years per capita)                                                              | -         |



| <b>Protein-energy malnutrition</b>    |                                                                                                    |                  |
|---------------------------------------|----------------------------------------------------------------------------------------------------|------------------|
| <b>Level</b>                          | <b>Covariate</b>                                                                                   | <b>Direction</b> |
| 1                                     | Age-standardised prevalence of severe anaemia                                                      | +                |
|                                       | Malnutrition shock mortality rate                                                                  | +                |
|                                       | Proportion of children 0-5 with weight-for-height z-score < -2                                     | +                |
|                                       | Total kcal per person per day availability                                                         | -                |
|                                       | Proportion underweight (<20 yrs: <-2 BMI z-scores; >20 yrs: <17 BMI)                               | +                |
| 2                                     | Population living in the 1 <sup>st</sup> world quintile (least) of annual rainfall                 | +/-              |
|                                       | Population living in the 2 <sup>nd</sup> world quintile (2 <sup>nd</sup> least) of annual rainfall | +/-              |
|                                       | Unsafe sanitation SEV                                                                              | +                |
|                                       | Mortality rate due to war shocks                                                                   | +                |
|                                       | Unsafe water SEV                                                                                   | +                |
|                                       | Health Systems Access Capped                                                                       | -                |
|                                       | Healthcare access and quality index                                                                | +                |
|                                       | Log-transformed SEV scalar: Diarrhoea                                                              | +                |
|                                       | Alcohol SEV (age, sex specific)                                                                    | +                |
|                                       |                                                                                                    |                  |
| 3                                     | Education (years per capita)                                                                       | -                |
|                                       | Lag distributed income per capita                                                                  | -                |
|                                       | Socio-demographic Index                                                                            | -                |
| <b>Other nutritional deficiencies</b> |                                                                                                    |                  |
| <b>Level</b>                          | <b>Covariate</b>                                                                                   | <b>Direction</b> |
| 1                                     | Age-standardised prevalence of severe anaemia                                                      | +                |
|                                       | Malnutrition shock mortality rate                                                                  | +                |
|                                       | Proportion of children 0-5 with weight-for-age z-score < -2                                        | +                |
|                                       | Total kcal per person per day availability                                                         | -                |
|                                       | Proportion underweight (<20 yrs: <-2 BMI z-scores; >20 yrs: <17 BMI)                               | +                |
| 2                                     | Population living in the 1 <sup>st</sup> world quintile (least) of annual rainfall                 | +/-              |
|                                       | Population living in the 2 <sup>nd</sup> world quintile (2 <sup>nd</sup> least) of annual rainfall | +/-              |
|                                       | Unsafe sanitation SEV                                                                              | +                |
|                                       | Mortality rate due to war shocks                                                                   | +                |
|                                       | Unsafe water SEV                                                                                   | +                |
|                                       | Health Systems Access Capped                                                                       | -                |
|                                       | Healthcare access and quality index                                                                | +                |
|                                       | Log-transformed SEV scalar: Diarrhoea                                                              | +                |
|                                       | Alcohol SEV (age, sex specific)                                                                    | +                |
|                                       |                                                                                                    |                  |
| 3                                     | Lag distributed income per capita                                                                  | -                |
|                                       | Socio-demographic Index                                                                            | -                |
|                                       | Maternal education (years per capita)                                                              | -                |

Estimates from the two nutritional sub-categories were then scaled at the 1,000 draw level in CODCorrect to match that for total nutritional deficiencies.

## Cancers

Input data and methodological summary for all cancers except for non-melanoma skin cancer

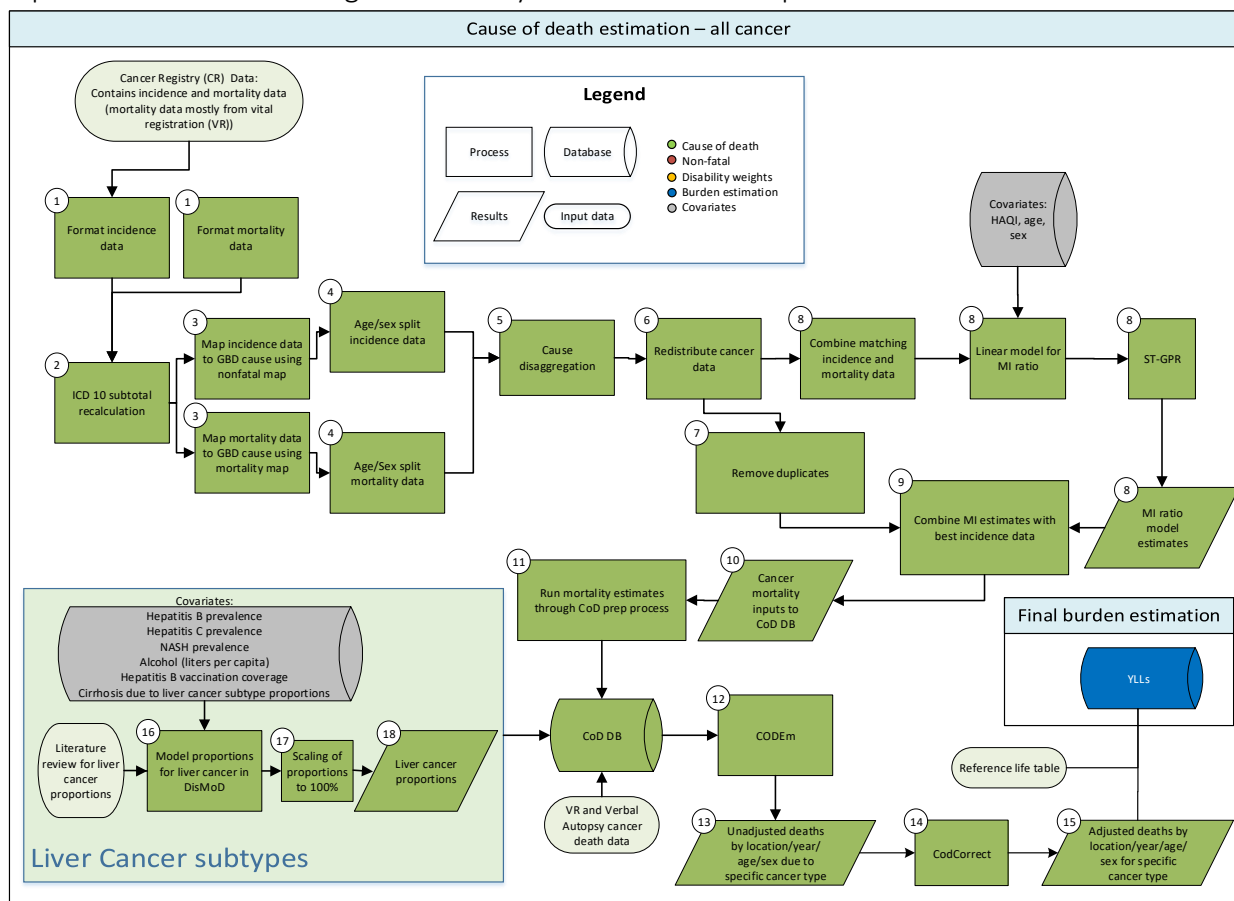

Abbreviations: ICD: International classification of diseases; DB: database, ST-GPR: Space-time smoothing, Gaussian process regression, COD: Causes of death

## Data

The cause of death (COD) database contains multiple sources of cancer mortality data. These sources include vital registration, verbal autopsy, and cancer registry data. The cancer registry mortality estimates that are uploaded into the COD database stem from cancer registry incidence data that have been transformed to mortality estimates through the use of mortality-to-incidence ratios (MIR).

### Data-seeking processes

#### Cancer mortality data in the cause of death database other than cancer registry data

Sources for cancer mortality data other than cancer registry data are described in the COD database description (Appendix Section 2).

#### Cancer registry data

Cancer registry data were used from publicly available sources or provided by collaborators. We used all data from GBD 2016 and added registry data from Russia, Iran, Ethiopia, Norway, as well as the newly released CI5 XI (Cancer Registry in Five Continents).

### *Inclusion and exclusion criteria*

Only population-based cancer registries were included, and only those that included all cancers (no specialty registries), data for all age groups, and data for both sexes. Pathology-based cancer registries were included if they had a defined population. Hospital-based cancer registries were excluded. Cancer registry data were excluded from either the final incidence data input or the MI model input if a more detailed source (eg, providing more detailed age or diagnostic groups) was available for the same population. Preference was given to registries with national coverage over those with only local coverage, except those from countries where the GBD study provides subnational estimates. Data were excluded if the coverage population was unknown.

### *Bias of categories of input data*

Cancer registry data can be biased in multiple ways. A high proportion of ill-defined cancer cases in the registry data requires redistribution of these cases to other cancers, which introduces a potential for bias. Changes between coding systems can lead to artificial differences in disease estimates; however, we adjust for this bias by mapping the different coding systems to the GBD causes. Underreporting of cancers that require advanced diagnostic techniques (eg, leukaemia and brain, pancreatic, and liver cancer) can be an issue in cancer registries from low-income countries. On the other hand, misclassification of metastatic sites as primary cancer can lead to overestimation of cancer sites that are common sites for metastases, like brain or liver. Since many cancer registries are located in urban areas, the representativeness of the registry for the general population can also be problematic. The accuracy of mortality data reported in cancer registries usually depends on the quality of the vital registration system. If the vital registration system is incomplete or of poor quality, the mortality-to-incidence ratio can be biased to lower ratios.

### *Data for liver cancer aetiology splits*

For GBD 2017, the aetiologies for liver cancer were expanded to include a separate aetiology of liver cancer due to non-alcoholic steatohepatitis (NASH). To find the proportion of liver cancer cases due to the five aetiology groups included in GBD (1. Liver cancer due to hepatitis B, 2. Liver cancer due to hepatitis C, 3. Liver cancer due to alcohol, 4. Liver cancer due to NASH, 5. Liver cancer due to other causes), a systematic literature search was performed in PubMed on 10/24/2016 using the following search string: “(“liver neoplasms”[All Fields] OR “HCC”[All Fields] OR “liver cancer”[All Fields] OR “Carcinoma, Hepatocellular”[Mesh]) AND (“hepatitis B”[All Fields] OR “Hepatitis B”[Mesh] OR “Hepatitis B virus”[Mesh] OR “Hepatitis B Antibodies”[Mesh] OR “Hepatitis B Antigens”[Mesh]) OR (“hepatitis C”[All Fields] OR “Hepatitis C”[Mesh] OR “hepatitis C antibodies”[MESH] OR “Hepatitis C Antigens”[Mesh] OR “Hepacivirus”[Mesh]) OR (“alcohol”[All Fields] OR “Alcohol Drinking”[Mesh] OR “Alcohol-Related Disorders”[Mesh] OR “Alcoholism”[Mesh] OR “Alcohol-Induced Disorders”[Mesh])) NOT (animals[MeSH] NOT humans[MeSH])”. Also, studies not found through this search but included in the meta-analysis by de Martel and colleagues were included.<sup>10</sup> We also included the study by Hong and colleagues after the authors provided us with additional data on the overlap in risk factors.<sup>11</sup>

Studies were included if the study population was representative of liver cancer population for the respective location. For each study, the proportions of liver cancer due to the five specific risk factors were calculated. Cases were considered to be due to NASH when the manuscript explicitly listed the aetiology to be NASH or non-alcoholic fatty liver disease (NAFLD). Cases where the aetiology was listed as “cryptogenic”, “idiopathic”, or “unknown” were included within the “other causes” category. In

manuscripts where the aetiology for a case was not known but major categories could not be ruled out (for example, the study tested for hepatitis B and C but did not assess alcohol use), these cases were excluded from the numerator of the study (in other words, did not contribute a proportion to any aetiology). Remaining risk factors were included under a combined “other” group (for example, haemochromatosis, autoimmune hepatitis, Wilson’s disease, etc.). If multiple risk factors were reported for an individual patient, these were apportioned proportionally to the individual risk factors.

## Methods

### *Steps of analysis and data transformation processes*

Cancer registry data went through multiple processing steps before integration with the COD database. First, the original data were transformed into standardised files, which included standardisation of format, categorisation, and registry names (#1 in flowchart).

Second, some cancer registries report individual codes as well as aggregated totals (eg, C18, C19, and C20 are reported individually but the aggregated group of C18-C20 [colorectal cancer] is also reported in the registry data). The data processing step “subtotal recalculation” (#2 in flowchart) verifies these totals and subtracts the values of any individual codes from the aggregates.

In the third step (#3 in the flowchart), cancer registry incidence data and cancer registry mortality data are mapped to GBD causes. A different map is used for incidence and for mortality data because of the assumption that there are no deaths for certain cancers. One example is basal cell carcinoma of the skin. In the cancer registry incidence data, basal cell carcinoma is mapped to non-melanoma skin cancer (basal cell carcinoma). However, if basal cell skin cancer is recorded in the cancer registry mortality data, the deaths are instead mapped to non-melanoma skin cancer (squamous cell carcinoma) under the assumption that they were indeed misclassified squamous cell skin cancers. Other examples are benign or in situ neoplasms. Benign or in situ neoplasms found in the cancer registry incidence dataset were simply dropped from that dataset. The same neoplasms reported in a cancer registry mortality dataset were mapped to the respective invasive cancer (eg, melanoma in situ in the cancer registry incidence dataset was dropped from the dataset; melanoma in situ in the cancer registry mortality dataset was mapped to melanoma).

In the fourth data processing step (#4 in the flowchart) cancer registry data were standardised to the GBD age groups. Age-specific incidence rates were generated using all datasets that include microdata, and datasets that report age groups up to 95+ years of age, while age-specific mortality rates were generated from the CoD data through a method described in Appendix section 2.5. Age-specific proportions were then generated by applying the age-specific rates to a given registry population that required age-splitting to produce the expected number of cases/deaths for that registry by age. The expected number of cases/deaths for each sex, age, and cancer were then normalised to 1, creating final, age-specific proportions. These proportions were then applied to the total number of cases/deaths by sex and cancer to get the age-specific number of cases/deaths.

In the rare case that the cancer registry only contained data for both sexes combined, the now-age-specific cases/deaths were split and reassigned to separate sexes using the same weights that are used for the age-splitting process. Starting from the expected number of deaths, proportions were generated

by sex for each age (eg, if for ages 15 to 19 years old there are six expected deaths for males and four expected deaths for females, then 60% of the combined-sex deaths for ages 15-19 years would be assigned to males and the remaining 40% would be assigned to females).

In the fifth step (#5 in the flowchart) data for cause entries that are aggregates of GBD causes were redistributed. Examples of these aggregated causes include some registries reporting ICD10 codes C00-C14 together as “lip, oral cavity, and pharyngeal cancer.” These groups were broken down into sub-causes that could be mapped to single GBD causes. In this example, those include lip and oral cavity cancer (C00-C08), nasopharyngeal cancer (C11), cancer of other parts of the pharynx (C09-C10, C12-C13), and “Malignant neoplasm of other and ill-defined sites in the lip, oral cavity, and pharynx” (C14). To redistribute the data, weights were created using the same “rate-applied-to-population” method employed in age-sex splitting (see step four above). For the undefined code (C14 in the example) an “average all cancer” weight was used, which was generated by adding all cases from SEER/NORDCAN/CI5 and dividing the total by the combined population. Then, proportions were generated by sub-cause for each aggregate cause as in the sex-splitting example above (see step four). The total number of cases from the aggregated group (C00-C14) was then recalculated for each subgroup and the undefined code (C14). C14 was then redistributed as a “garbage code” in step six. Distinct proportions were used for C44 (non-melanoma skin cancer) and C46 (Kaposi’s sarcoma). Non-melanoma skin cancer processing is described under section “Input data and methodological summary for non-melanoma skin cancer (squamous-cell carcinoma).” C46 entries were redistributed as “other cancer,” and HIV using proportions described in Appendix Section 2.

In the sixth step (#6 in the flowchart) unspecified codes (“garbage codes”) were redistributed. Redistribution of cancer registry incidence and mortality data mirrored the process of the redistribution used in the cause of death database (Appendix Section 2.7).

In the seventh step (#7 in the flowchart) duplicate or redundant sources were removed from the processed cancer registry dataset. Duplicate sources were present if, for example, the cancer registry was part of the CI5 database but we also had data from the registry directly. Redundancies occurred and were removed as described in “Inclusion and Exclusion Criteria,” where more detailed data were available, or when national registry data could replace regionally representative data. From here, two parallel selection processes were run to generate input data for the MI models and to generate incidence for final mortality estimation. Higher priority was given to registry data from the most standardised source when creating the final incidence input, whereas for the MI model input only sources that reported incidence and mortality were used.

In the eighth step (#8 in the flowchart) the processed incidence and mortality data from cancer registries were matched by cancer, age, sex, year, and location to generate MI ratios. These MI ratios were used as input for a three-step modelling approach using the updated GBD 2017 ST-GPR approach with the Healthcare Access and Quality (HAQ) Index as a covariate in the linear step mixed effects model using a logit link function. This is different from GBD 2016, where we used Socio-demographic Index (SDI) as a predictive covariate. Predictions were made without the random effects. The ST-GPR model has three main hyper-parameters that control for smoothing across time, age, and geography. The time adjustment parameter ( $\lambda$ ) was set to 2, which aims to borrow strength from neighbouring time points (ie, the exposure in this year is highly correlated with exposure in the previous year but less so further back in time). The age adjustment parameter  $\omega$  was set to 0.5, which borrows strength from data in

neighbouring age groups. The space adjustment parameter  $\xi$  was set to 0.95 in locations with data and to 0.5 in locations without data (the higher  $\xi$  was applied when at least one age-sex group in the country of estimation had at least five unique data points. The lower  $\xi$  was applied when estimating data-scarce countries). Zeta aims to borrow strength across the hierarchy of geographical locations.<sup>12</sup> For the amplitude parameter in the Gaussian process regression we used 2, and for the scale we used a value of 15.

For GBD 2017 we slightly changed the data cleaning process and used HAQ rather than SDI to exclude data. For each cancer, MI ratios from locations in HAQ quintiles 1-4 were dropped if they were below the median of MI ratios from locations in HAQ quintile 5. We also dropped MI ratios from locations in HAQ quintiles 1-4 if the MI ratios were above the third quartile + 1.5 \* IQR (inter-quartile range). We dropped all MIR that were based on less than 25 cases to avoid noise due to small numbers except for mesothelioma and acute lymphoid leukaemia, where we dropped MIR that were based on fewer than ten cases because of lower data availability for these two cancers. We also aggregated incidence and mortality to the youngest five-year age bin where we had at least 50 data points to avoid MIR predictions in young age groups that were based on few data points. The MIR in the age-bin that was used to aggregate MIR was used to backfill the MIR for younger age groups.

Since MI ratios can be above 1, especially in older age groups and cancers with low cure rates, we used the 95<sup>th</sup> percentile of the cleaned dataset that only included MIR that were based on 50 or more cases, to cap the MIR input data. This “upper cap” was used to allow MIR over 1 but to constrain the MIR to a maximum level. To run the logit model, the input data were divided by the upper caps and model predictions after ST-GPR was rescaled by multiplying them by the upper caps. To constrain the model at the lower end, we used the fifth percentile of the cancer-specific cleaned MIR input data to replace all model predictions with this lower cap.

Final MI ratios were matched with the cancer registry incidence dataset in the ninth step (#9 in the flowchart) to generate mortality estimates (Incidence \* Mortality/Incidence = Mortality) (#10 in the flowchart). The final mortality estimates were then uploaded into the COD database (#11 in the flowchart). Cancer-specific mortality modelling then followed the general CODEm process.

#### *Liver cancer aetiology split models*

The proportion data found through the systematic literature review were used as input for five separate DisMod-MR 2.1 models to determine the proportion of liver cancers due to the five subgroups for all locations, both sexes, and all age groups (step #16 in the flowchart). A study covariate was used for publications that only assessed liver cancer in a cirrhotic population. The reference, or “gold standard”, that was used for crosswalking was the compilation of all studies that assessed the aetiology of liver cancer in a general population. For liver cancer due to hepatitis C and hepatitis B, a prior value of 0 was set between age 0 and 0.01. For liver cancer due to alcohol, a prior value of 0 was set for ages 0 to 5 years. For liver cancer due to hepatitis C, hepatitis C (IgG) seroprevalence was used as a covariate as well as a covariate for alcohol (litres per capita), hepatitis B prevalence (HBsAg seroprevalence), and NASH/NAFLD prevalence, forcing a negative relationship between the alcohol, hepatitis B, hepatitis C, and NASH/NAFLD covariates and the outcome of liver cancer due to alcohol proportion. For liver cancer due to hepatitis B, seroprevalence of HBsAg was used as a covariate as well as a covariate for alcohol, hepatitis C IgG seroprevalence, NASH/NAFLD prevalence, and the population coverage of three-dose

hepatitis B vaccination, forcing a negative relationship between these covariates and the outcome of liver cancer due to hepatitis B proportion. For liver cancer due to alcohol, alcohol (litres per capita) was used as a covariate as well as a covariate for proportion of alcohol abstainers, hepatitis B and hepatitis C seroprevalence, and NASH/NAFLD prevalence, forcing a negative relationship between the proportion of alcohol abstainers, NASH/NAFLD, and hepatitis B and hepatitis C covariates and the outcome of liver cancer due to alcohol proportion. For liver cancer due to NASH, NASH/NAFLD prevalence was used as a covariate as well as a covariate for obesity prevalence and mean body-mass index (BMI), forcing a positive relationship between these covariates and the outcome of liver cancer due to NASH proportion. All covariates used were modelled independently. To ensure consistency between cirrhosis and liver cancer estimates and to take advantage of the data for the respective other related cause (eg, liver cancer due to hepatitis C and the related cause cirrhosis due to hepatitis C), we generated covariates from the liver cancer proportion models that we used in the cirrhosis aetiology proportion models. We then created covariates from the cirrhosis aetiology proportion models and used those in the liver cancer aetiology models.

Since the proportion models are run independently of each other, the final proportion models were scaled to sum to 100% within each age, sex, year, and location, by dividing each proportion by the sum of the five (step # 17). For the liver cancer subtype mortality estimates, we multiplied the parent cause “liver cancer” by the corresponding scaled proportions (step # 18). Single-cause estimates were adjusted to fit into the separately modelled all-cause mortality in the process CoDCorrect.

## Results

### Interpretation of results

Cancer mortality estimates for GBD 2017 can differ from the GBD 2016 results for multiple reasons. Updated cancer mortality data were added from vital registration system data, verbal autopsy studies, as well as cancer registry incidence data. A new cause “Myelodysplastic, myeloproliferative, and other haematopoietic neoplasms” was added. In GBD 2016 all deaths due to this new cause were counted in the category “other neoplasms”. The mortality-to-incidence ratio estimation has been updated compared to GBD 2016, using HAQ rather than SDI in the data cleaning and modelling process, and the ST-GPR approach was also updated. Covariate inputs for the CODEm models were changed based on recommendations from collaborators. Covariates used in CODEm models were updated for GBD 2017.

The other group producing country-level cancer mortality estimates is the International Agency for Research on Cancer (IARC) with their GLOBOCAN database. Significantly different methods between the GBD study and GLOBOCAN can lead to differences in results. Whereas estimates in GLOBOCAN are based on the assumption that there are “In theory, [...] as many methods as countries,”<sup>13</sup> the cancer estimation process for the GBD study follows a coherent, well-documented method for all cancers, which allows cross-validation of models as well as determination of uncertainty. Another major difference is the ability in the GBD study to adjust single-cause estimates to the all-cause mortality, which is being determined independently. This also allows us to adjust individual causes of death to the all-cause mortality envelope, which permits us to correct for the underdiagnosis of cancer in countries with inadequate diagnostic resources. Redistribution of a fraction of undefined causes of death to certain cancers is another methodological advantage the GBD study has over GLOBOCAN, and estimates for cancer mortality can therefore differ substantially in countries with a large proportion of undefined

causes of deaths in their vital registration data or a large proportion of undefined cancer cases in their cancer registry data.

## Limitations

There are certain limitations to consider when interpreting the GBD cancer mortality estimates. First, even though every effort is made to include the most recently available data for each country, data-seeking resources are not limitless and new data cannot always be accessed as soon as they are made available. It is therefore possible that the GBD study does not include all available data sources for cancer incidence or cancer mortality. Second, different redistribution methods can potentially change the cancer estimates substantially if the data sources used for the estimated location contain a large number of undefined causes; however, neglecting to account for these undefined deaths would likely introduce an even greater bias in the disease estimates. Third, using mortality-to-incidence ratios to transform cancer registry incidence data to mortality estimates requires accurate MIR. For GBD 2017 we have made further changes to the MIR estimation, but the method remains sensitive to underdiagnosis of cancer cases or underascertainment of cancer deaths. However, given that the majority of data used for the cancer mortality estimation come from vital registration data and not cancer registry data, this is not a major limitation.

## Non-melanoma skin cancer (squamous cell carcinoma)

### Data

#### *Data seeking processes*

Since squamous cell carcinomas are only very infrequently recorded by cancer registries, only vital registration system data were used as input for the squamous cell carcinoma mortality modelling.

#### *Inclusion and exclusion criteria*

Inclusion and exclusion criteria followed the same methods as described for the vital registration data sources (Appendix Section 2).

#### *Bias of categories of input data*

The potential biases of the input data are the same as for other cancers (see above).

### Methods

#### *Overall methodological process*

Vital registration system data were used as input to model deaths due to squamous cell skin cancer.

#### *Steps of analysis and data transformation processes*

Since mortality estimates for non-melanoma skin cancer are only produced for squamous cell carcinoma under the assumption that basal cell carcinoma causes almost no deaths, all mortalities reported as “C44” or “173” were mapped to the “squamous cell carcinoma” GBD cause.

#### *Model selection*

The modelling strategy for non-melanoma skin cancer (squamous cell carcinoma) followed the general CODEm process.



### *Model performance and sensitivity*

The modelling performance and sensitivity for non-melanoma skin cancer (squamous cell carcinoma) mirrored that of the general CODEm process.

### *Uncertainty intervals*

Uncertainty was determined using standard CODEm methodology.

## Results

### *Interpretation of results*

Non-melanoma skin cancer mortality estimates are not available from other sources. GLOBOCAN, for example, does not report deaths due to non-melanoma skin cancer. Even though the data availability for non-melanoma skin cancer is poor, the fact that it is the most common incident cancer, with rates expected to rise, makes it a necessity to include the disease in the GBD framework.

### *Limitations*

Cancer registry data for non-melanoma skin cancer incidence have to be interpreted with caution due to a substantial amount of underreporting or rules that only the first non-melanoma skin cancer has to be registered. Many cancer registries therefore do not include non-melanoma skin cancers at all. However, information on whether registries capture NMSC or not is not consistently available. Therefore, no cancer registry data were used to estimate deaths due to squamous cell carcinoma of the skin. For vital registration data, we make the assumption that there are no deaths due to basal cell non-melanoma skin cancer; therefore, all deaths attributed to basal cell carcinoma were included instead as squamous cell carcinoma.

Covariates by cancer:

Lip and oral cavity cancer

| Level | Covariate                           | Direction |
|-------|-------------------------------------|-----------|
| 1     | Alcohol (litres per capita)         | +         |
|       | Cumulative cigarettes (5 years)     | +         |
|       | Cumulative cigarettes (10 years)    | +         |
|       | Cumulative cigarettes (15 years)    | +         |
|       | Cumulative cigarettes (20 years)    | +         |
|       | Smoking prevalence                  | +         |
|       | Tobacco (cigarettes per capita)     | +         |
|       | Log-transformed SEV scalar: Mouth C | +         |
|       | Vegetables adjusted (g)             | -         |
| 2     | Red meats adjusted (g)              | +         |
|       | Fruits adjusted (g)                 | -         |
|       | Health system access 2 (unitless)*  | -         |
|       | Healthcare access and quality index | -         |
| 3     | Education (years per capita)        | -         |
|       | LDI (I\$ per capita)                | 0         |
|       | Socio-demographic Index             | 0         |

Nasopharynx cancer

| Level | Covariate                            | Direction |
|-------|--------------------------------------|-----------|
| 1     | Alcohol (litres per capita)          | +         |
|       | Cumulative cigarettes (5 years)      | +         |
|       | Cumulative cigarettes (10 years)     | +         |
|       | Cumulative cigarettes (15 years)     | +         |
|       | Cumulative cigarettes (20 years)     | +         |
|       | Smoking prevalence                   | +         |
|       | Tobacco (cigarettes per capita)      | +         |
|       | Log-transformed SEV scalar: Nasoph C | +         |
|       | Vegetables adjusted (g)              | -         |
| 2     | Red meats adjusted (g)               | +         |
|       | Fruits adjusted (g)                  | -         |
|       | Health system access 2 (unitless)*   | -         |
|       | Healthcare access and quality index  | -         |
| 3     | Education (years per capita)         | -         |
|       | LDI (I\$ per capita)                 | 0         |
|       | Socio-demographic Index              | 0         |

Oesophageal cancer

| Level | Covariate                                              | Direction |
|-------|--------------------------------------------------------|-----------|
| 1     | Alcohol (litres per capita)                            | +         |
|       | Log-transformed SEV scalar: Esophag C                  | +         |
|       | Log-transformed age-standardized SEV scalar: Esophag C | +         |
|       | Mean BMI                                               | +         |
|       | Smoking prevalence                                     | +         |
|       | Tobacco (cigarettes per capita)                        | +         |
|       | Fruits adjusted (g)                                    | -         |
|       | Indoor air pollution (all cooking fuels)               | +         |
| 2     | Sanitation (proportion with access)                    | -         |
|       | Vegetables adjusted (g)                                | -         |
|       | Improved water source (proportion with access)         | -         |
|       | Healthcare access and quality index                    | -         |
| 3     | Education (years per capita)                           | -         |
|       | LDI (I\$ per capita)                                   | 0         |
|       | Socio-demographic Index                                | 0         |

Other pharynx cancer

| Level | Covariate                                           | Direction |
|-------|-----------------------------------------------------|-----------|
| 1     | Alcohol (litres per capita)                         | +         |
|       | Smoking prevalence                                  | +         |
|       | Log-transformed SEV scalar: Oth Phar C              | +         |
|       | Vegetables adjusted (g)                             | -         |
| 2     | Cumulative cigarettes (5 years)                     | +         |
|       | Fruits adjusted (g)                                 | -         |
|       | Vegetables adjusted (g)                             | -         |
|       | Population density (over 1000 ppl/sqkm, proportion) | +         |
|       | Population density (under 150 ppl/sqkm, proportion) | +         |
|       | Healthcare access and quality index                 | -         |
| 3     | Education (years per capita)                        | -         |
|       | LDI (I\$ per capita)                                | 0         |
|       | Socio-demographic Index                             | 0         |

Stomach cancer

| Level                                          | Covariate                             | Direction               |
|------------------------------------------------|---------------------------------------|-------------------------|
| 1                                              | Diet high in sodium                   | +                       |
|                                                | Cumulative cigarettes (5 years)       | +                       |
|                                                | Cumulative cigarettes (10 years)      | +                       |
|                                                | Cumulative cigarettes (15 years)      | +                       |
|                                                | Cumulative cigarettes (20 years)      | +                       |
|                                                | Smoking prevalence                    | +                       |
|                                                | Tobacco (cigarettes per capita)       | +                       |
|                                                | Log-transformed SEV scalar: Stomach C | +                       |
|                                                | SEV unsafe water                      | +                       |
|                                                | SEV unsafe sanitation                 | +                       |
|                                                | 2                                     | Vegetables adjusted (g) |
| Fruits adjusted (g)                            |                                       | -                       |
| Mean BMI                                       |                                       | +                       |
| Sanitation (proportion with access)            |                                       | -                       |
| Improved water source (proportion with access) |                                       | -                       |
| Healthcare access and quality index            |                                       | -                       |
| 3                                              | Education (years per capita)          | -                       |
|                                                | LDI (I\$ per capita)                  | 0                       |
|                                                | Socio-demographic Index               | 0                       |

Colon and rectum cancer

| Level                                         | Covariate                              | Direction         |
|-----------------------------------------------|----------------------------------------|-------------------|
| 1                                             | Alcohol (litres per capita)            | +                 |
|                                               | Mean BMI                               | +                 |
|                                               | Smoking prevalence                     | +                 |
|                                               | Tobacco (cigarettes per capita)        | +                 |
|                                               | Log-transformed SEV scalar: Colorect C | +                 |
|                                               | Red meats adjusted (g)                 | +                 |
|                                               | 2                                      | Milk adjusted (g) |
| Fruits adjusted (g)                           |                                        | -                 |
| Nuts seeds adjusted (g)                       |                                        | -                 |
| PUFA adjusted (percent)                       |                                        | -                 |
| Vegetables adjusted (g)                       |                                        | -                 |
| Cumulative cigarettes (5 years)               |                                        | +                 |
| Cumulative cigarettes (10 years)              |                                        | +                 |
| Cumulative cigarettes (15 years)              |                                        | +                 |
| Cumulative cigarettes (20 years)              |                                        | +                 |
| Diabetes age-specific prevalence (proportion) |                                        | +                 |
| Healthcare access and quality index           | -                                      |                   |
| 3                                             | Education (years per capita)           | -                 |
|                                               | LDI (I\$ per capita)                   | 0                 |
|                                               | Socio-demographic Index                | 0                 |

Liver cancer

| Level | Covariate                                                    | Direction |
|-------|--------------------------------------------------------------|-----------|
| 1     | Alcohol (litres per capita)                                  | +         |
|       | HIV age-standardised prevalence                              | +         |
|       | Hepatitis B (HBsAg) seroprevalence                           | +         |
|       | Hepatitis C (IgG) seroprevalence                             | +         |
|       | Log-transformed SEV scalar: Liver C                          | +         |
| 2     | Hepatitis B 3-dose coverage (proportion)                     | -         |
|       | Hepatitis B 3-dose coverage (proportion), lagged 5 years     | -         |
|       | Hepatitis B 3-dose coverage (proportion), lagged 10 years    | -         |
|       | Hepatitis B vaccine coverage (proportion), aged through time | -         |
|       | Intravenous drug use (age-standardised proportion)           | +         |
|       | Cumulative cigarettes (5 years)                              | +         |
|       | Cumulative cigarettes (10 years)                             | +         |
|       | Cumulative cigarettes (15 years)                             | +         |
|       | Cumulative cigarettes (20 years)                             | +         |
|       | Diabetes age-specific prevalence (proportion)                | +         |
|       | Diabetes fasting plasma glucose (mmol/L)                     | +         |

Liver cancer, continued

| Level | Covariate                           | Direction |
|-------|-------------------------------------|-----------|
| 2     | Mean BMI                            | +         |
|       | Tobacco (cigarettes per capita)     | +         |
|       | Red meats adjusted (g)              | +         |
|       | Healthcare access and quality index | -         |
| 3     | Education (years per capita)        | -         |
|       | LDI (I\$ per capita)                | 0         |
|       | Socio-demographic Index             | 0         |

Gallbladder and biliary tract cancer

| Level                   | Covariate                                         | Direction                    |
|-------------------------|---------------------------------------------------|------------------------------|
| 1                       | Log-transformed SEV scalar: Gallblad C            | +                            |
|                         | Mean BMI                                          | +                            |
| 2                       | Alcohol (litres per capita)                       | +                            |
|                         | Cumulative cigarettes (5 years)                   | +                            |
|                         | Cumulative cigarettes (10 years)                  | +                            |
|                         | Smoking prevalence                                | +                            |
|                         | Tobacco (cigarettes per capita)                   | +                            |
|                         | Fruits adjusted (g)                               | -                            |
|                         | Vegetables adjusted (g)                           | -                            |
|                         | Diabetes age-standardised prevalence (proportion) | +                            |
|                         | Healthcare access and quality index               | -                            |
|                         | 3                                                 | Education (years per capita) |
| LDI (I\$ per capita)    |                                                   | 0                            |
| Socio-demographic Index |                                                   | 0                            |

Pancreatic cancer

| Level | Covariate                                         | Direction |
|-------|---------------------------------------------------|-----------|
| 1     | Alcohol (litres per capita)                       | +         |
|       | Cumulative cigarettes (5 years)                   | +         |
|       | Cumulative cigarettes (10 years)                  | +         |
|       | Cumulative cigarettes (15 years)                  | +         |
|       | Cumulative cigarettes (20 years)                  | +         |
|       | Smoking prevalence                                | +         |
|       | Tobacco (cigarettes per capita)                   | +         |
|       | Log-transformed SEV scalar: Pancreas C            | +         |
|       | Mean BMI                                          | +         |
| 2     | Red meats adjusted (g)                            | +         |
|       | Fruits adjusted (g)                               | -         |
|       | Vegetables adjusted (g)                           | -         |
|       | Energy unadjusted (kcal)                          | +         |
|       | Diabetes fasting plasma glucose (mmol/L)          | +         |
|       | Diabetes age-standardised prevalence (proportion) | +         |
|       | Healthcare access and quality index               | -         |
| 3     | Education (years per capita)                      | -         |
|       | LDI (I\$ per capita)                              | 0         |
|       | Socio-demographic Index                           | 0         |

Larynx cancer

| Level                                               | Covariate                                              | Direction |
|-----------------------------------------------------|--------------------------------------------------------|-----------|
| 1                                                   | Alcohol (litres per capita)                            | +         |
|                                                     | Log-transformed SEV scalar: Larynx C                   | +         |
| 2                                                   | Smoking prevalence                                     | +         |
|                                                     | Tobacco (cigarettes per capita)                        | +         |
|                                                     | Asbestos consumption (metric tons per year per capita) | +         |
|                                                     | Fruits adjusted (g)                                    | -         |
|                                                     | Vegetables adjusted (g)                                | -         |
|                                                     | Cumulative cigarettes (5 years)                        | +         |
|                                                     | Cumulative cigarettes (10 years)                       | +         |
|                                                     | Cumulative cigarettes (15 years)                       | +         |
|                                                     | Cumulative cigarettes (20 years)                       | +         |
|                                                     | Population density (over 1000 ppl/sqkm, proportion)    | +         |
| Population density (under 150 ppl/sqkm, proportion) | +                                                      |           |
| 3                                                   | Healthcare access and quality index                    | -         |
|                                                     | Education (years per capita)                           | -         |
|                                                     | LDI (I\$ per capita)                                   | 0         |
|                                                     | Socio-demographic Index                                | 0         |

Tracheal, bronchus, and lung cancer

| Level | Covariate                                           | Direction |
|-------|-----------------------------------------------------|-----------|
| 1     | Alcohol (litres per capita)                         | +         |
|       | Cumulative cigarettes (5 yYears)                    | +         |
|       | Cumulative cigarettes (10 years)                    | +         |
|       | Cumulative cigarettes (15 years)                    | +         |
|       | Cumulative cigarettes (20 years)                    | +         |
|       | Smoking prevalence                                  | +         |
|       | Tobacco (cigarettes per capita)                     | +         |
|       | Secondhand smoke                                    | +         |
|       | Log-transformed SEV scalar: Lung C                  | +         |
|       | Log-transformed age-standardised SEV scalar: Lung C | +         |
| 2     | Indoor air pollution (all cooking fuels)            | +         |
|       | Outdoor air pollution (PM <sub>2.5</sub> )          | +         |
|       | Residential radon                                   | +         |
|       | Diabetes fasting plasma glucose (mmol/L)            | +         |
|       | Healthcare access and quality index                 | -         |
|       | Education (years per capita)                        | -         |
| 3     | LDI (I\$ per capita)                                | 0         |
|       | Socio-demographic Index                             | 0         |

### Malignant skin melanoma

| Level | Covariate                           | Direction |
|-------|-------------------------------------|-----------|
| 1     | Alcohol (litres per capita)         | +         |
| 2     | Fruits adjusted (g)                 | -         |
|       | Vegetables adjusted (g)             | -         |
|       | Latitude under 15 (proportion)      | -         |
|       | Latitude 15 to 30 (proportion)      | 0         |
|       | Latitude 30 to 45 (proportion)      | -         |
|       | Latitude over 45 (proportion)       | -         |
|       | Healthcare access and quality index | -         |
| 3     | Education (years per capita)        | -         |
|       | LDI (I\$ per capita)                | 0         |
|       | Socio-demographic Index             | 0         |

### Non-melanoma skin cancer

| Level | Covariate                           | Direction |
|-------|-------------------------------------|-----------|
| 1     | Cumulative cigarettes (5 years)     | +         |
|       | Cumulative cigarettes (10 years)    | +         |
|       | Cumulative cigarettes (15 years)    | +         |
|       | Smoking prevalence                  | +         |
| 2     | Average latitude                    | 0         |
|       | Healthcare access and quality index | -         |
| 3     | Education (years per capita)        | 0         |
|       | LDI (I\$ per capita)                | 0         |
|       | Socio-demographic Index             | 0         |

### Breast cancer

| Level                                    | Covariate                            | Direction |
|------------------------------------------|--------------------------------------|-----------|
| 1                                        | Alcohol (litres per capita)          | +         |
|                                          | Mean BMI                             | +         |
|                                          | Log-transformed SEV scalar: Breast C | +         |
| 2                                        | Age-specific fertility rate          | -         |
|                                          | Total fertility rate                 | -         |
|                                          | Fruits adjusted (g)                  | -         |
|                                          | Vegetables adjusted (g)              | -         |
|                                          | Cumulative cigarettes (5 years)      | +         |
|                                          | Cumulative cigarettes (10 years)     | +         |
|                                          | Cumulative cigarettes (15 years)     | +         |
|                                          | Cumulative cigarettes (20 years)     | +         |
|                                          | Smoking prevalence                   | +         |
|                                          | Secondhand smoke                     | +         |
| Diabetes fasting plasma glucose (mmol/L) | +                                    |           |
| Healthcare access and quality index      | -                                    |           |
| 3                                        | Education (years per capita)         | -         |
|                                          | LDI (I\$ per capita)                 | 0         |
|                                          | Socio-demographic Index              | 0         |

Cervical cancer

| <b>Level</b> | <b>Covariate</b>                           | <b>Direction</b> |
|--------------|--------------------------------------------|------------------|
| 1            | <i>Cumulative cigarettes (5 years)</i>     | +                |
|              | <i>Cumulative cigarettes (10 years)</i>    | +                |
|              | <i>Cumulative cigarettes (15 years)</i>    | +                |
|              | <i>HIV age-standardised prevalence</i>     | +                |
| 2            | <i>Age-specific fertility rate</i>         | +                |
|              | <i>Total fertility rate</i>                | +                |
|              | <i>Smoking prevalence</i>                  | +                |
|              | <i>Fruits adjusted (g)</i>                 | -                |
|              | <i>Vegetables adjusted (g)</i>             | -                |
|              | <i>Healthcare access and quality index</i> | -                |
| 3            | <i>Education (years per capita)</i>        | -                |
|              | <i>LDI (I\$ per capita)</i>                | 0                |
|              | <i>Socio-demographic Index</i>             | 0                |

Uterine cancer

| <b>Level</b> | <b>Covariate</b>                                         | <b>Direction</b> |
|--------------|----------------------------------------------------------|------------------|
| 1            | <i>Log-transformed SEV scalar: Uterus C</i>              | +                |
|              | <i>Mean BMI</i>                                          | +                |
| 2            | <i>Cumulative cigarettes (5 years)</i>                   | +                |
|              | <i>Cumulative cigarettes (10 years)</i>                  | +                |
|              | <i>Smoking prevalence</i>                                | +                |
|              | <i>Tobacco (cigarettes per capita)</i>                   | +                |
|              | <i>Diabetes age-standardized prevalence (proportion)</i> | +                |
|              | <i>Total fertility rate</i>                              | 0                |
|              | <i>Fruits adjusted (g)</i>                               | -                |
|              | <i>Vegetables adjusted (g)</i>                           | -                |
|              | <i>Healthcare access and quality index</i>               | -                |
| 3            | <i>Education (years per capita)</i>                      | -                |
|              | <i>LDI (I\$ per capita)</i>                              | 0                |
|              | <i>Socio-demographic Index</i>                           | 0                |

Prostate cancer

| <b>Level</b> | <b>Covariate</b>                              | <b>Direction</b> |
|--------------|-----------------------------------------------|------------------|
| 1            | <i>Log-transformed SEV scalar: Prostate C</i> | +                |
| 2            | <i>Smoking prevalence</i>                     | 0                |
|              | <i>Healthcare access and quality index</i>    | -                |
| 3            | <i>Education (years per capita)</i>           | 0                |
|              | <i>LDI (I\$ per capita)</i>                   | 0                |
|              | <i>Socio-demographic Index</i>                | 0                |

### Ovarian cancer

| Level                                             | Covariate                                      | Direction                                              |
|---------------------------------------------------|------------------------------------------------|--------------------------------------------------------|
| 1                                                 | Alcohol (litres per capita)                    | +                                                      |
|                                                   | Cumulative cigarettes (5 years)                | +                                                      |
|                                                   | Cumulative cigarettes (10 years)               | +                                                      |
|                                                   | Cumulative cigarettes (15 years)               | +                                                      |
|                                                   | Cumulative cigarettes (20 years)               | +                                                      |
|                                                   | Tobacco (cigarettes per capita)                | +                                                      |
|                                                   | Contraception (modern prevalence (proportion)) | -                                                      |
|                                                   | Log-transformed SEV scalar: Ovary C            | +                                                      |
|                                                   | 2                                              | Asbestos consumption (metric tons per year per capita) |
| Smoking prevalence                                |                                                | +                                                      |
| Total fertility rate                              |                                                | 0                                                      |
| Energy unadjusted (kcal)                          |                                                | +                                                      |
| Fruits adjusted (g)                               |                                                | -                                                      |
| Vegetables adjusted (g)                           |                                                | -                                                      |
| Mean BMI                                          |                                                | +                                                      |
| Diabetes age-standardised prevalence (proportion) |                                                | +                                                      |
| Diabetes fasting plasma glucose (mmol/L)          |                                                | +                                                      |
| Healthcare access and quality index               |                                                | -                                                      |

### Ovarian cancer, continued

|   |                              |   |
|---|------------------------------|---|
| 3 | Education (years per capita) | - |
|   | LDI (I\$ per capita)         | 0 |
|   | Socio-demographic Index      | 0 |

### Testicular cancer

| Level                   | Covariate                           | Direction                    |
|-------------------------|-------------------------------------|------------------------------|
| 2                       | Cumulative cigarettes (5 years)     | +                            |
|                         | Cumulative cigarettes (10 years)    | +                            |
|                         | Cumulative cigarettes (15 years)    | +                            |
|                         | Cumulative cigarettes (20 years)    | +                            |
|                         | Tobacco (cigarettes per capita)     | +                            |
|                         | Smoking prevalence                  | +                            |
|                         | Fruits adjusted (g)                 | -                            |
|                         | Vegetables adjusted (g)             | -                            |
|                         | Healthcare access and quality index | -                            |
|                         | 3                                   | Education (years per capita) |
| LDI (I\$ per capita)    |                                     | 0                            |
| Socio-demographic Index |                                     | 0                            |



### Kidney cancer

| Level | Covariate                                         | Direction |
|-------|---------------------------------------------------|-----------|
| 1     | Cumulative cigarettes (5 years)                   | +         |
|       | Cumulative cigarettes (10 years)                  | +         |
|       | Cumulative cigarettes (15 years)                  | +         |
|       | Mean BMI                                          | +         |
|       | Log-transformed SEV scalar: Kidney C              | +         |
| 2     | Alcohol (litres per capita)                       | +         |
|       | Diabetes age-standardised prevalence (proportion) | +         |
|       | Systolic blood pressure (mmHg)                    | +         |
|       | Smoking prevalence                                | +         |
|       | Healthcare access and quality index               | -         |
| 3     | Education (years per capita)                      | -         |
|       | LDI (I\$ per capita)                              | 0         |
|       | Socio-demographic Index                           | 0         |

### Bladder cancer

| Level                                    | Covariate                               | Direction                    |
|------------------------------------------|-----------------------------------------|------------------------------|
| 1                                        | Schistosomiasis prevalence (proportion) | +                            |
|                                          | Cumulative cigarettes (5 years)         | +                            |
|                                          | Cumulative cigarettes (10 years)        | +                            |
|                                          | Cumulative cigarettes (15 years)        | +                            |
|                                          | Smoking prevalence                      | +                            |
|                                          | Log-transformed SEV scalar: Bladder C   | +                            |
|                                          | 2                                       | Alcohol (litres per capita)  |
| Diabetes fasting plasma glucose (mmol/L) |                                         | +                            |
| Vegetables adjusted (g)                  |                                         | -                            |
| Fruits adjusted (g)                      |                                         | -                            |
| Healthcare access and quality index      |                                         | -                            |
| 3                                        |                                         | Education (years per capita) |
|                                          | LDI (I\$ per capita)                    | 0                            |
|                                          | Socio-demographic Index                 | 0                            |

### Brain and nervous system cancer

| Level | Covariate                            | Direction |
|-------|--------------------------------------|-----------|
| 1     | Alcohol (litres per capita)          | +         |
|       | Cumulative cigarettes (10 years)     | +         |
|       | Cumulative cigarettes (15 years)     | +         |
|       | Smoking prevalence                   | +         |
| 2     | Cholesterol (total, mean per capita) | +         |
|       | Systolic blood pressure (mmHg)       | +         |
|       | Red meats adjusted (g)               | +         |
|       | Vegetables adjusted (g)              | -         |
|       | Fruits adjusted (g)                  | -         |
| 3     | Healthcare access and quality index  | -         |
|       | Education (years per capita)         | -         |
|       | LDI (I\$ per capita)                 | 0         |
|       | Socio-demographic Index              | 0         |

### Thyroid cancer

| Level | Covariate                                      | Direction |
|-------|------------------------------------------------|-----------|
| 1     | Alcohol (litres per capita)                    | +         |
|       | Smoking prevalence                             | +         |
|       | Log-transformed SEV scalar: Thyroid C          | +         |
| 2     | Vegetables adjusted (g)                        | -         |
|       | Fruits adjusted (g)                            | -         |
|       | Red meats adjusted (g)                         | +         |
|       | Tobacco (cigarettes per capita)                | +         |
|       | Mean BMI                                       | +         |
|       | Smoking prevalence                             | +         |
|       | Sanitation (proportion with access)            | -         |
|       | Improved water source (proportion with access) | -         |
| 3     | Healthcare access and quality index            | -         |
|       | Education (years per capita)                   | -         |
|       | LDI (I\$ per capita)                           | 0         |
|       | Socio-demographic Index                        | 0         |

### Mesothelioma

| Level | Covariate                                              | Direction |
|-------|--------------------------------------------------------|-----------|
| 1     | Asbestos consumption (metric tons per year per capita) | +         |
|       | Cumulative cigarettes (5 years)                        | +         |
|       | Asbestos production (binary)                           | +         |
|       | Smoking prevalence                                     | +         |
|       | Indoor air pollution (all cooking fuels)               | +         |
|       | Log-transformed SEV scalar: Mesothel                   | +         |
|       | Log-transformed age-standardised SEV scalar: Mesothel  | +         |
| 2     | Asbestos production (kg) per capita                    | +         |
|       | Gold production (binary)                               | +         |
|       | Gold production (kg) per capita                        | +         |
|       | Population density (over 1000 ppl/sqkm, proportion)    | +         |
|       | Healthcare access and quality index                    | -         |
|       | Education (years per capita)                           | -         |
| 3     | LDI (I\$ per capita)                                   | 0         |
|       | Socio-demographic Index                                | 0         |

### Hodgkin's Lymphoma

| Level | Covariate                           | Direction |
|-------|-------------------------------------|-----------|
| 2     | Healthcare access and quality index | -         |
| 3     | Education (years per capita)        | -         |
|       | LDI (I\$ per capita)                | 0         |
|       | Socio-demographic Index             | 0         |

### Non-Hodgkin lymphoma

| Level | Covariate                           | Direction |
|-------|-------------------------------------|-----------|
| 2     | Cumulative cigarettes (5 years)     | +         |
|       | Cumulative cigarettes (10 years)    | +         |
|       | Cumulative cigarettes (15 years)    | +         |
|       | Cumulative cigarettes (20 years)    | +         |
|       | Alcohol (litres per capita)         | +         |
|       | Smoking prevalence                  | +         |
|       | Mean BMI                            | +         |
|       | Healthcare access and quality index | -         |
| 3     | Total fertility rate                | 0         |
|       | LDI (I\$ per capita)                | 0         |
|       | Socio-demographic Index             | 0         |

### Multiple myeloma

| Level | Covariate                                      | Direction |
|-------|------------------------------------------------|-----------|
| 1     | Alcohol (litres per capita)                    | +         |
|       | Smoking prevalence                             | +         |
|       | Tobacco (cigarettes per capita)                | +         |
| 2     | Vegetables adjusted (g)                        | -         |
|       | Fruits adjusted (g)                            | -         |
|       | Red meats adjusted (g)                         | +         |
|       | Tobacco (cigarettes per capita)                | +         |
|       | Mean BMI                                       | +         |
|       | Sanitation (proportion with access)            | -         |
|       | Improved water source (proportion with access) | -         |
|       | Healthcare access and quality index            | -         |
| 3     | Education (years per capita)                   | -         |
|       | LDI (I\$ per capita)                           | 0         |
|       | Socio-demographic Index                        | 0         |

### Leukaemia

| Level                               | Covariate                                              | Direction |
|-------------------------------------|--------------------------------------------------------|-----------|
| 1                                   | Log-transformed age-standardised SEV scalar: Leukaemia | +         |
|                                     | Log-transformed SEV scalar: Leukaemia                  | +         |
| 2                                   | Alcohol (litres per capita)                            | +         |
|                                     | Mean BMI                                               | +         |
|                                     | Cumulative cigarettes (5 years)                        | +         |
|                                     | Cumulative cigarettes (10 years)                       | +         |
|                                     | Cumulative cigarettes (15 years)                       | +         |
|                                     | Cumulative cigarettes (20 years)                       | +         |
|                                     | Smoking prevalence                                     | +         |
|                                     | Tobacco (cigarettes per capita)                        | +         |
| Healthcare access and quality index | -                                                      |           |
| 3                                   | Education (years per capita)                           | -         |
|                                     | LDI (I\$ per capita)                                   | 0         |
|                                     | Socio-demographic Index                                | 0         |

Myelodysplastic, myeloproliferative, other haematopoietic neoplasms

Other malignant cancers

Other neoplasms

| Level | Covariate                                              | Direction |
|-------|--------------------------------------------------------|-----------|
| 1     | Log-transformed age-standardised SEV scalar: Leukaemia | +         |
|       | Log-transformed SEV scalar: Leukaemia                  | +         |
| 2     | Alcohol (litres per capita)                            | +         |
|       | Mean BMI                                               | +         |
|       | Cumulative cigarettes (5 years)                        | +         |
|       | Cumulative cigarettes (10 years)                       | +         |
|       | Cumulative cigarettes (15 years)                       | +         |
|       | Cumulative cigarettes (20 years)                       | +         |
|       | Smoking prevalence                                     | +         |
|       | Tobacco (cigarettes per capita)                        | +         |
|       | Healthcare access and quality index                    | -         |
| 3     | Education (years per capita)                           | -         |
|       | LDI (I\$ per capita)                                   | 0         |
|       | Socio-demographic Index                                | 0         |

| Level | Covariate                           | Direction |
|-------|-------------------------------------|-----------|
| 1     | Smoking prevalence                  | +         |
|       | Tobacco (cigarettes per capita)     | +         |
| 2     | Vegetables adjusted (g)             | -         |
|       | Fruits adjusted (g)                 | -         |
|       | Nuts seeds adjusted (g)             | -         |
|       | PUFA adjusted (percent)             | -         |
|       | Mean BMI                            | -         |
|       | Healthcare access and quality index | -         |
| 3     | Education (years per capita)        | -         |
|       | LDI (I\$ per capita)                | 0         |
|       | Socio-demographic Index             | 0         |

| Level | Covariate                           | Direction |
|-------|-------------------------------------|-----------|
| 2     | Healthcare access and quality index | -         |
| 3     | Education (years per capita)        | -         |
|       | LDI (I\$ per capita)                | 0         |
|       | Socio-demographic Index             | 0         |

## References

- 1 Waterhouse J, Muir C, Shanmugaratnam K, Powell J. Cancer Incidence in Five Continents IV. Lyon: IARC, 1982.
- 2 Curado M, Edwards B, Shin H, *et al.* Cancer Incidence in Five Continents IX. Lyon: IARC, 2007 <http://www.iarc.fr/en/publications/pdfs-online/epi/sp160/CI5vol9-A.pdf>.
- 3 Muir C, Mack T, Powell J, Whelan S. Cancer Incidence in Five Continents V. Lyon: IARC, 1987.
- 4 Parkin D, Muir C, Whelan S, Gao Y, Ferlay J, Powell J. Cancer Incidence in Five Continents VI. Lyon: IARC, 1992.
- 5 Parkin D, Whelan S, Ferlay J, Raymond L, Young J. Cancer Incidence in Five Continents VII. Lyon: IARC, 1997.
- 6 Parkin D, Whelan S, Ferlay J, Teppo L, Thomas D. Cancer Incidence in Five Continents VIII. Lyon: IARC, 2002.
- 7 Forman D, Bray F, Brewster D, *et al.* Cancer Incidence in Five Continents X. 2013. <http://ci5.iarc.fr>.
- 8 Engholm G, Ferlay J, Christensen N, *et al.* NORDCAN: Cancer Incidence, Mortality, Prevalence and Survival in the Nordic Countries, Version 7.3 Association of the Nordic Cancer Registries. Danish Cancer Society. 2016; published online Aug 7. <http://www.ancr.nu>.
- 9 Steliarova-Foucher E, O'Callaghan M, Ferlay J, Masuyer E, Forman D, Comber H, Bray F. European Cancer Observatory: Cancer Incidence, Mortality, Prevalence and Survival in Europe. Version 1.0 European Network of Cancer Registries, International Agency for Research on Cancer. 2012; published online Sept. <http://eco.iarc.fr>.
- 10 de Martel C, Maucort-Boulch D, Plummer M, Franceschi S. World-wide relative contribution of hepatitis B and C viruses in hepatocellular carcinoma. *Hepatology* 2015; **62**: 1190–200.
- 11 Hong TP, Gow P, Fink M, *et al.* Novel population-based study finding higher than reported hepatocellular carcinoma incidence suggests an updated approach is needed. *Hepatology* 2016; **63**: 1205–12.
- 12 GBD 2015 Risk Factors Collaborators. Global, regional, and national comparative risk assessment of 79 behavioural, environmental and occupational, and metabolic risks or clusters of risks, 1990–2015: a systematic analysis for the Global Burden of Disease Study 2015. *The Lancet* 2016; **388**: 1659–724.
- 13 International Agency for Research on Cancer, World Health Organization. GLOBOCAN estimated cancer incidence, mortality, and prevalence worldwide in 2012. Lyon, France: IARC, 2014 <http://globocan.iarc.fr/Default.aspx> (accessed April 19, 2016).
- 14 Karagas MR, Greenberg ER, Spencer SK, Stukel TA, Mott LA. Increase in incidence rates of basal cell and squamous cell skin cancer in New Hampshire, USA. New Hampshire Skin Cancer Study Group. *Int J Cancer* 1999; **81**: 555–9.

## Cardiovascular Diseases

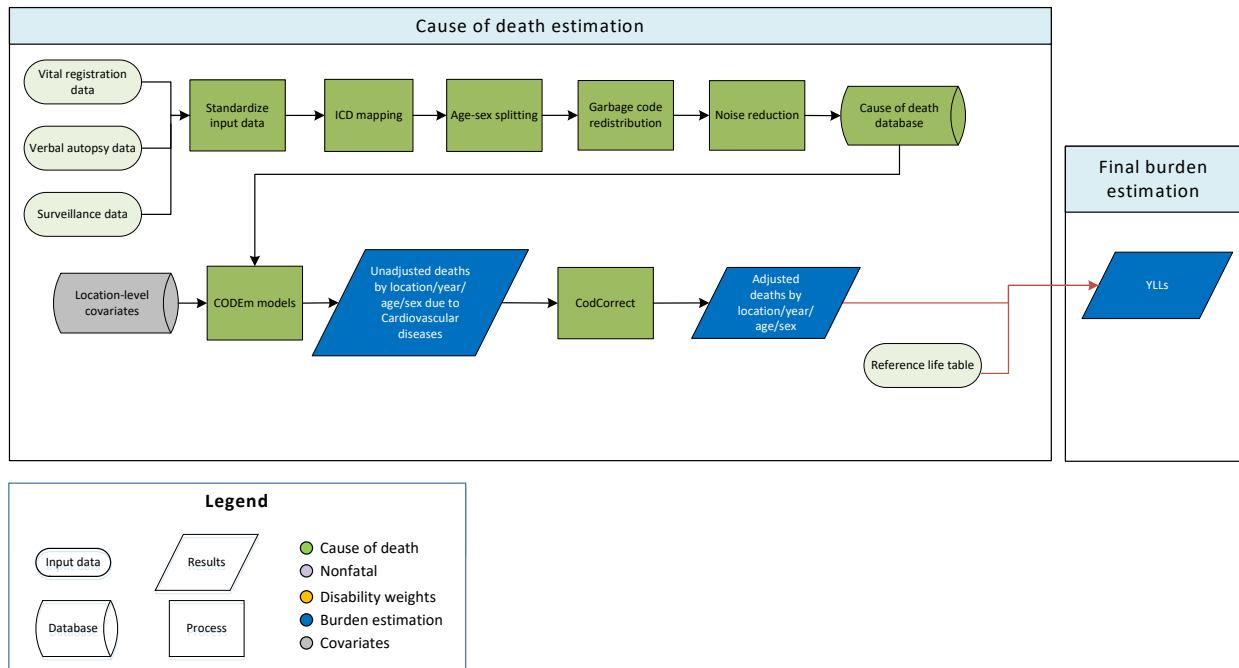

### Input data

Vital registration, verbal autopsy, and surveillance data were used to model the parent cardiovascular envelope. We outliered non-representative subnational verbal autopsies from a number of Indian states. We also outliered verbal autopsy data sources that were implausibly low in all age groups and ICD8 and ICD9 BTL data points that were inconsistent with the rest of the data and created implausible time trends.

### Modelling strategy

We used a standard CODEm approach to model deaths from cardiovascular diseases. The covariates included in the ensemble modelling process are listed in the table below. There have been no substantive changes from the approach used in GBD 2016.

**Table: Selected covariates for CODEm models, cardiovascular diseases**

| Covariate                                         | Transformation | Level | Direction |
|---------------------------------------------------|----------------|-------|-----------|
| Summary exposure variable, cardiovascular disease | None           | 1     | 1         |
| Cholesterol (total, mean per capita)              | None           | 1     | 1         |
| Smoking prevalence                                | None           | 1     | 1         |
| Systolic blood pressure (mmHg)                    | None           | 1     | 1         |
| Trans fatty acid                                  | None           | 1     | 1         |
| Mean BMI                                          | None           | 2     | 1         |
| Elevation over 1500m (proportion)                 | None           | 2     | -1        |
| Fasting plasma glucose (mmol/L)                   | None           | 2     | 1         |
| Outdoor pollution (PM <sub>2.5</sub> )            | None           | 2     | 1         |
| Indoor air pollution (all fuel types)             | None           | 2     | 1         |
| Healthcare access and quality index               | None           | 2     | -1        |
| Lag distributed income per capita (I\$)           | Log            | 3     | -1        |
| Socio-demographic Index                           | None           | 3     | 0         |
| Omega-3 (kcal/capita, adjusted)                   | Log            | 3     | -1        |
| Fruits (kcal/capita, adjusted)                    | None           | 3     | -1        |
| Vegetables (kcal/capita, adjusted)                | None           | 3     | -1        |
| Nuts and seeds (kcal/capita, adjusted)            | None           | 3     | -1        |
| Whole grains (kcal/capita, adjusted)              | None           | 3     | -1        |
| Pulses/legumes (kcal/capita, adjusted)            | None           | 3     | -1        |
| PUFA adjusted (percent)                           | None           | 3     | -1        |
| Alcohol (litres per capita)                       | None           | 3     | 0         |

## Rheumatic Heart Disease

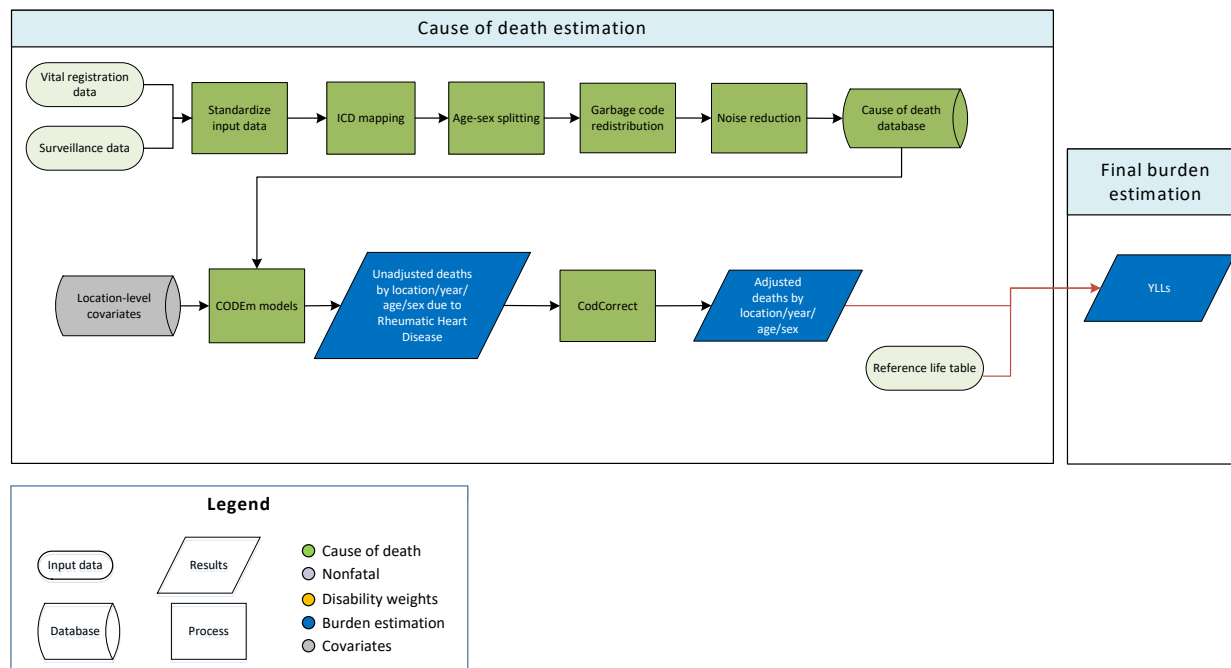

### Input data

Vital registration and surveillance data were used to model rheumatic heart disease. We outliered ICD8 and ICD9 BTL data points which were inconsistent with the rest of the data and created implausible time trends. We also outliered data points which were too high after the redistribution process in a number of age groups.

### Modelling strategy

We used a standard CODEm approach to model deaths from rheumatic heart disease. We have made no updates to the covariates used in the modelling process since GBD 2016. There have been no other substantive changes from the approach used in GBD 2016.

**Table 1: Selected covariates for CODEm models, rheumatic heart disease**

| Covariate                           | Transformation | Level | Direction |
|-------------------------------------|----------------|-------|-----------|
| Rheumatic heat disease SEV scalar   | None           | 1     | 1         |
| Improved water (proportion)         | None           | 1     | -1        |
| Malnutrition                        | None           | 1     | 1         |
| Sanitation (proportion with access) | None           | 1     | -1        |
| Healthcare access and quality index | None           | 2     | -1        |
| LDI                                 | Log            | 3     | -1        |
| SDI                                 | None           | 3     | -1        |
| Education (years per capita)        | None           | 3     | -1        |



## Ischaemic Heart Disease

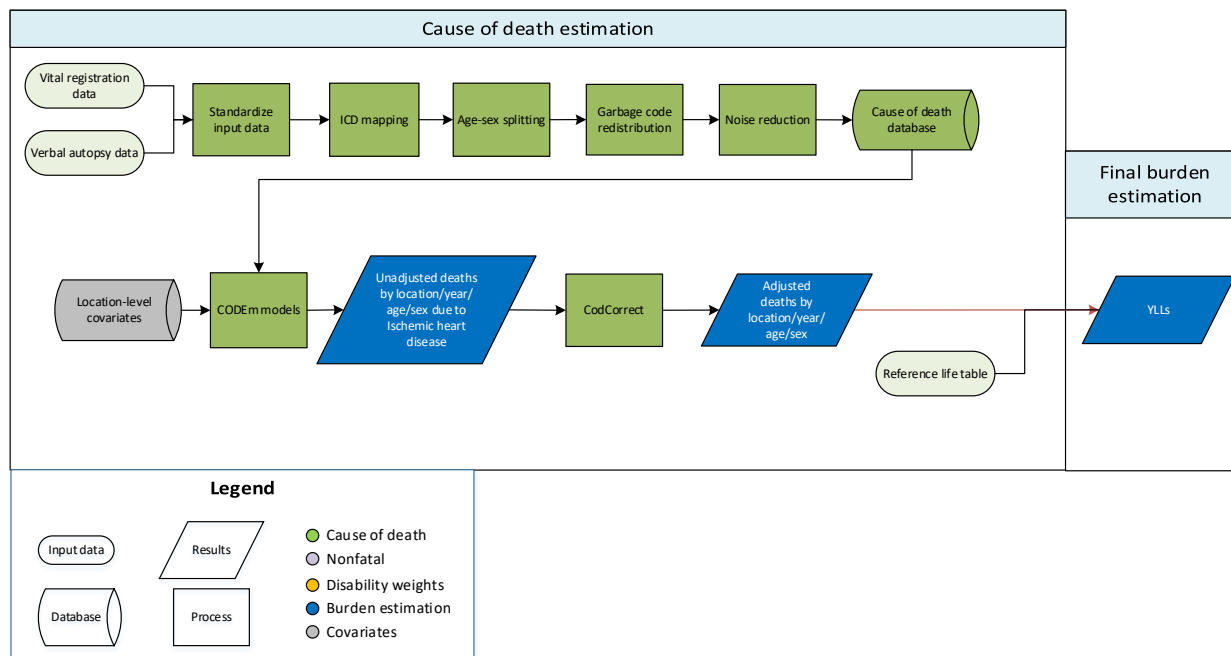

### Input data

Vital registration, verbal autopsy data were used to model ischaemic heart disease. We outliered verbal autopsy data in countries and subnational locations where high-quality vital registration data were also available. We also outliered non-representative subnational verbal autopsy data points, ICD8 and ICD9 BTL data points which were inconsistent with the rest of the data and created implausible time trends, and data in a number of Indian states identified by experts as poor-quality.

### Modelling strategy

We used a standard CODEm approach to model deaths from ischemic heart disease. The covariates chosen for inclusion in the ensemble modelling process are listed in the table below. There have been no substantive changes from the approach used in GBD 2016.

**Table: Selected covariates for CODEm models, ischaemic heart disease**

| Covariate                               | Transformation | Level | Direction |
|-----------------------------------------|----------------|-------|-----------|
| Summary exposure variable               | None           | 1     | 1         |
| Cholesterol (total, mean per capita)    | None           | 1     | 1         |
| Smoking prevalence                      | None           | 1     | 1         |
| Systolic blood pressure (mmHg)          | None           | 1     | 1         |
| Trans fatty acid                        | None           | 1     | 1         |
| Mean BMI                                | None           | 2     | 1         |
| Elevation over 1500m (proportion)       | None           | 2     | -1        |
| Fasting plasma glucose                  | None           | 2     | 1         |
| Outdoor pollution (PM <sub>2.5</sub> )  | None           | 2     | 1         |
| Indoor air pollution                    | None           | 2     | 1         |
| Healthcare access and quality index     | None           | 2     | -1        |
| Lag distributed income per capita (I\$) | Log            | 3     | -1        |
| Socio-demographic Index                 | None           | 3     | 0         |
| Omega-3 (kcal/capita, adjusted)         | Log            | 3     | -1        |
| Fruits (kcal/capita, adjusted)          | None           | 3     | -1        |
| Vegetables (kcal/capita, adjusted)      | None           | 3     | -1        |
| Nuts and seeds (kcal/capita, adjusted)  | None           | 3     | -1        |
| Whole grains (kcal/capita, adjusted)    | None           | 3     | -1        |
| Pulses/legumes (kcal/capita, adjusted)  | None           | 3     | -1        |
| PUFA (percent, adjusted)                | None           | 3     | -1        |
| Alcohol (litres per capita)             | None           | 3     | 0         |

## Stroke

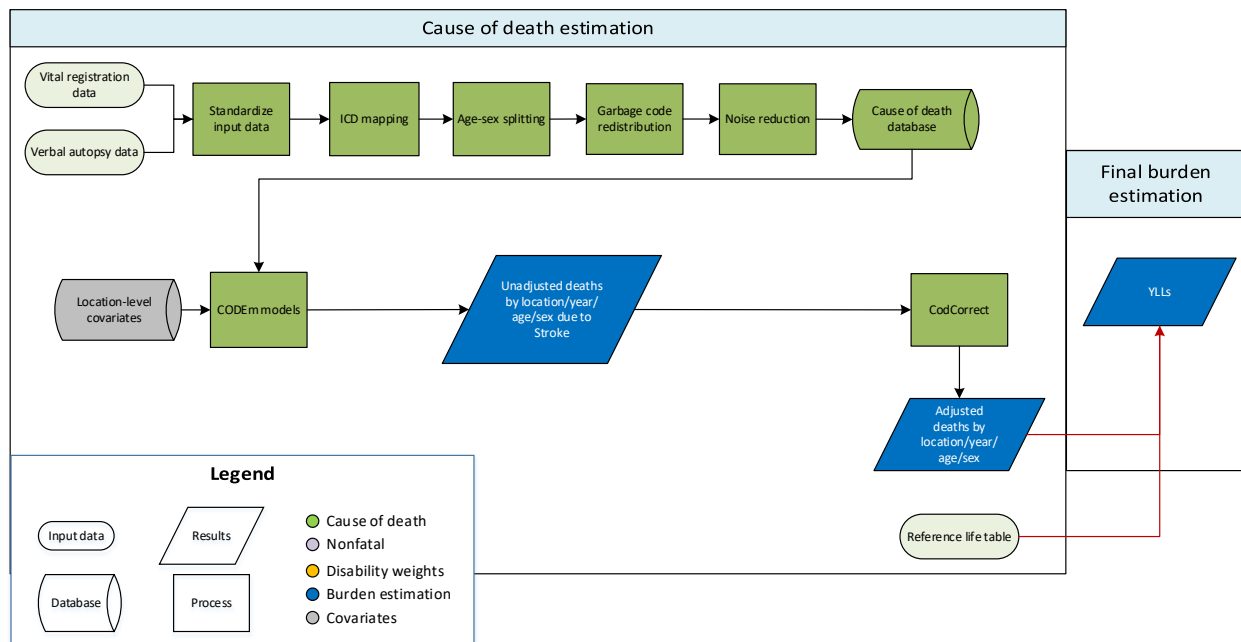

### Input data

Verbal autopsy and vital registration data were used to model cerebrovascular disease. We reassigned deaths from verbal autopsy reports for cerebrovascular disease to the parent cardiovascular disease for both sexes for those under 20 years of age. We outliered non-representative subnational verbal autopsy data points. We also outliered ICD8, ICD9 BTL, and ICD10 Tabulated data points which were inconsistent with the rest of the data and created implausible time trends. Data points from sources which were implausibly low in all age groups and data points that were causing the regional estimates to be improbably high were outliered.

### Modelling strategy

We used a standard CODEm approach to model deaths from stroke. The covariates included in the ensemble modelling process are listed in the table below. Apart from the updated strategy to reassign mis-coded deaths which should have been attributed to Alzheimer's and other dementias, Parkinson's disease, or atrial fibrillation and flutter, there have been no substantive changes from the approach used in GBD 2016.

**Table: Selected covariates for CODEm models, stroke**

| Covariate                               | Transformation | Level | Direction |
|-----------------------------------------|----------------|-------|-----------|
| Summary exposure variable, stroke       | None           | 1     | 1         |
| Cholesterol (total, mean per capita)    | None           | 1     | 1         |
| Smoking prevalence                      | None           | 1     | 1         |
| Systolic blood pressure (mmHg)          | None           | 1     | 1         |
| Trans fatty acid                        | None           | 1     | 1         |
| Mean BMI                                | None           | 2     | 1         |
| Elevation over 1500m (proportion)       | None           | 2     | -1        |
| Fasting plasma glucose                  | None           | 2     | 1         |
| Outdoor pollution (PM <sub>2.5</sub> )  | None           | 2     | 1         |
| Indoor air pollution                    | None           | 2     | 1         |
| Healthcare access and quality index     | None           | 2     | -1        |
| Lag distributed income per capita (I\$) | Log            | 3     | -1        |
| Socio-demographic Index                 | None           | 3     | 0         |
| Omega-3 (kcal/capita, adjusted)         | Log            | 3     | -1        |
| Fruits (kcal/capita, adjusted)          | None           | 3     | -1        |
| Vegetables (kcal/capita, adjusted)      | None           | 3     | -1        |
| Nuts and seeds (kcal/capita, adjusted)  | None           | 3     | -1        |
| Whole grains (kcal/capita, adjusted)    | None           | 3     | -1        |
| Pulses/legumes (kcal/capita, adjusted)  | None           | 3     | -1        |
| PUFA adjusted (percent)                 | None           | 3     | -1        |
| Alcohol (litres per capita)             | None           | 3     | 0         |

## Ischaemic Stroke

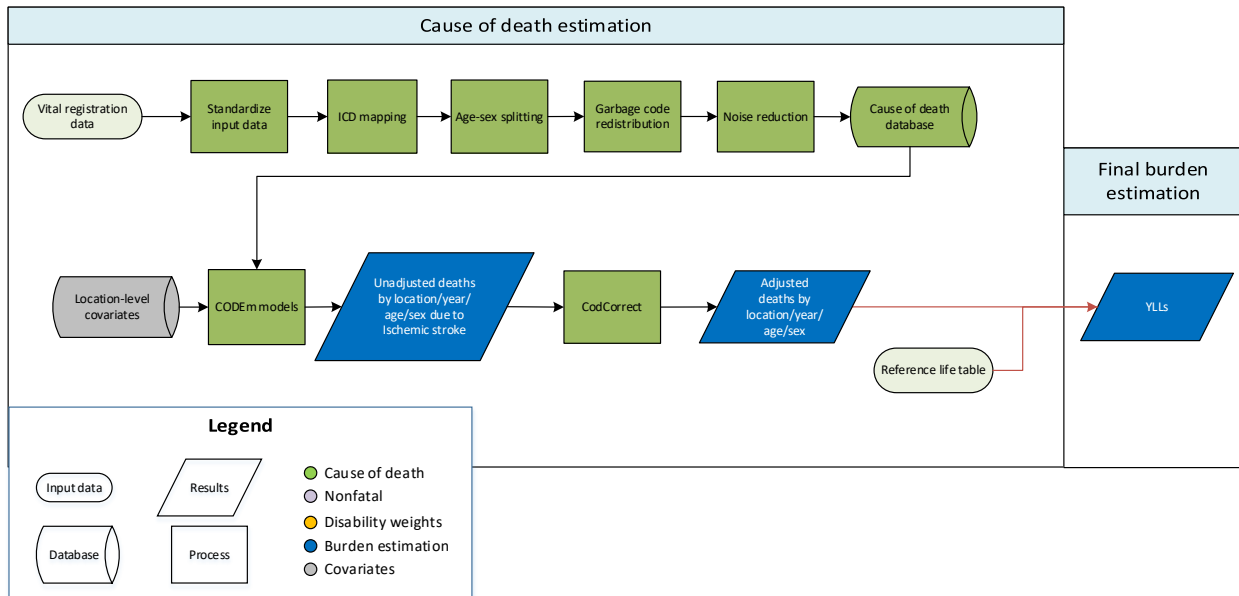

### Input data

Vital registration data were used to model ischaemic stroke. We outliered ICD8 data points which were inconsistent with the rest of the data and created implausible time trends.

### Modelling strategy

We used a standard CODEm approach to model deaths from ischemic stroke. In locations with limited data on ischaemic stroke, the subtype-specific deaths were estimated by squeezing both ischaemic and haemorrhagic stroke to the overall cerebrovascular envelope. The covariates selected for inclusion in the ensemble modelling process are listed in the table below. Apart from the updated strategy to reassign mis-coded deaths which should have been attributed to Alzheimer's and other dementias, Parkinson's disease, or atrial fibrillation and flutter, there have been no substantive changes from the approach used in GBD 2016.

**Table: Selected covariates for CODEm models, ischaemic stroke**

| Covariate                                   | Transformation | Level | Direction |
|---------------------------------------------|----------------|-------|-----------|
| Summary exposure variable, ischaemic stroke | None           | 1     | 1         |
| Cholesterol (total, mean per capita)        | None           | 1     | 1         |
| Smoking prevalence                          | None           | 1     | 1         |
| Systolic blood pressure (mmHg)              | None           | 1     | 1         |
| Trans fatty acid                            | None           | 1     | 1         |
| Mean BMI                                    | None           | 2     | 1         |
| Elevation over 1500m (proportion)           | None           | 2     | -1        |
| Fasting plasma glucose                      | None           | 2     | 1         |
| Outdoor pollution (PM <sub>2.5</sub> )      | None           | 2     | 1         |
| Indoor air pollution                        | None           | 2     | 1         |
| Healthcare access and quality index         | None           | 2     | -1        |
| Lag distributed income per capita (I\$)     | Log            | 3     | -1        |
| Socio-demographic Index                     | None           | 3     | 0         |
| Omega-3 (kcal/capita, adjusted)             | Log            | 3     | -1        |
| Fruits (kcal/capita, adjusted)              | None           | 3     | -1        |
| Vegetables (kcal/capita, adjusted)          | None           | 3     | -1        |
| Nuts and seeds (kcal/capita, adjusted)      | None           | 3     | -1        |
| Whole grains (kcal/capita, adjusted)        | None           | 3     | -1        |
| Pulses/legumes (kcal/capita, adjusted)      | None           | 3     | -1        |
| PUFA adjusted (percent)                     | None           | 3     | -1        |
| Alcohol (litres per capita)                 | None           | 3     | 0         |

## Intracerebral Haemorrhage

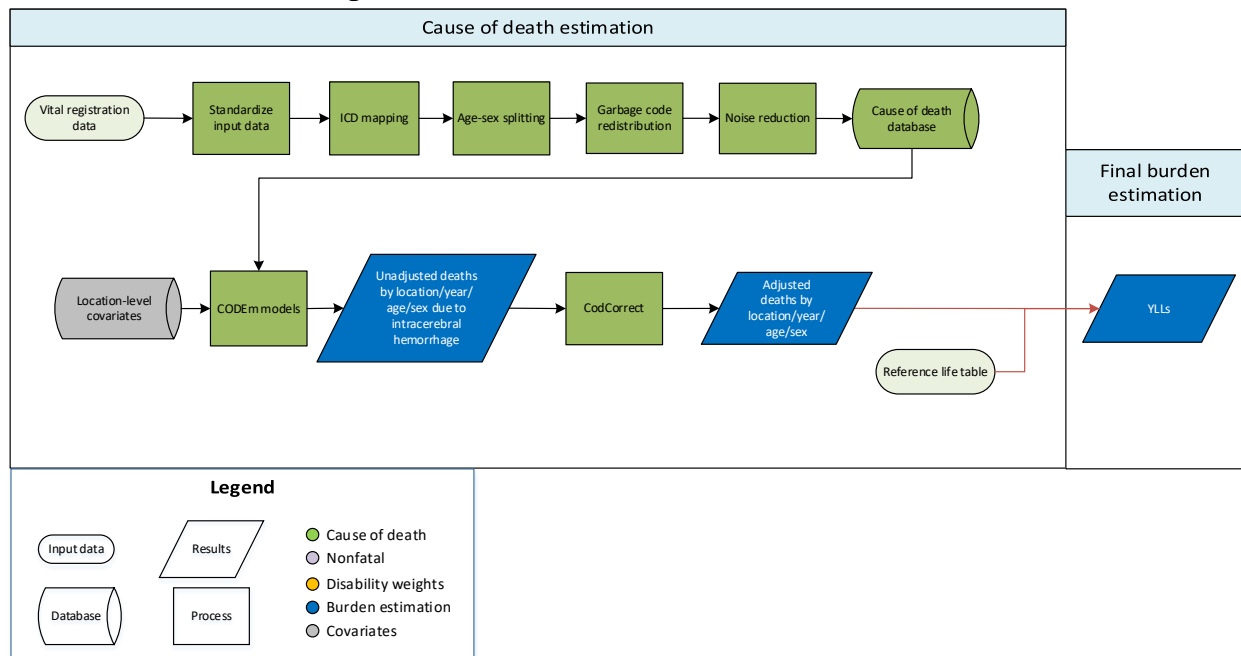

### Input data

Vital registration data were used to model intracerebral haemorrhage. We outliered ICD8 data points which were inconsistent with the rest of the data and created implausible time trends.

### Modelling strategy

We used a standard CODEm approach to model deaths from intracerebral haemorrhage. The covariates chosen for inclusion in the ensemble modelling process are listed in the table below. In previous iterations of GBD, we modelled intracerebral haemorrhage and subarachnoid haemorrhage together as haemorrhagic stroke. Other than this change, there have been no substantive changes from the modelling approach used in GBD 2016.

**Table: Selected covariates for CODEm models, intracerebral haemorrhage**

| Covariate                               | Transformation | Level | Direction |
|-----------------------------------------|----------------|-------|-----------|
| Summary exposure variable, ICH          | None           | 1     | 1         |
| Cholesterol (total, mean per capita)    | None           | 1     | 0         |
| Smoking prevalence                      | None           | 1     | 1         |
| Systolic blood pressure (mmHg)          | None           | 1     | 1         |
| Trans fatty acid                        | None           | 1     | 1         |
| Mean BMI                                | None           | 2     | 1         |
| Elevation over 1500m (proportion)       | None           | 2     | -1        |
| Fasting plasma glucose                  | None           | 2     | 1         |
| Outdoor pollution (PM <sub>2.5</sub> )  | None           | 2     | 1         |
| Indoor air pollution                    | None           | 2     | 1         |
| Healthcare access and quality index     | None           | 2     | -1        |
| Lag distributed income per capita (I\$) | Log            | 3     | -1        |
| Socio-demographic Index                 | None           | 3     | 0         |
| Omega-3 (kcal/capita, adjusted)         | Log            | 3     | -1        |
| Fruits (kcal/capita, adjusted)          | None           | 3     | -1        |
| Vegetables (kcal/capita, adjusted)      | None           | 3     | -1        |
| Nuts and seeds (kcal/capita, adjusted)  | None           | 3     | -1        |
| Whole grains (kcal/capita, adjusted)    | None           | 3     | -1        |
| Pulses/legumes (kcal/capita, adjusted)  | None           | 3     | -1        |
| PUFA adjusted (percent)                 | None           | 3     | -1        |
| Alcohol (litres per capita)             | None           | 3     | 0         |



## Subarachnoid Haemorrhage

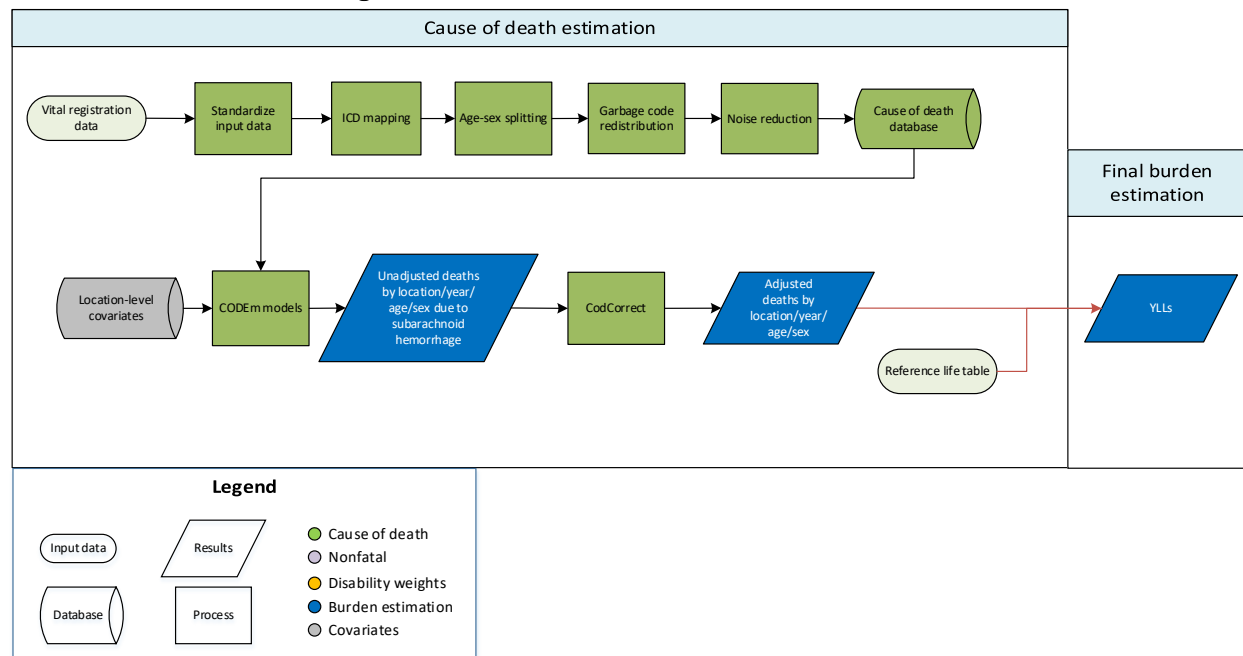

### Input data

Vital registration data were used to model subarachnoid haemorrhage. We outliered ICD8 data points which were inconsistent with the rest of the data and created implausible time trends.

### Modelling strategy

We used a standard CODEm approach to model deaths from subarachnoid haemorrhage. The covariates chosen for inclusion in the ensemble modelling process are listed in the table below. In previous iterations of GBD, we modelled intracerebral haemorrhage and subarachnoid haemorrhage together as haemorrhagic stroke. GBD 2017 is the first iteration where we have produced estimates specific to subarachnoid haemorrhage.

**Table: Selected covariates for CODEm models, subarachnoid haemorrhage**

| Covariate                               | Transformation | Level | Direction |
|-----------------------------------------|----------------|-------|-----------|
| Smoking prevalence                      | None           | 1     | 1         |
| Systolic blood pressure (mmHg)          | None           | 1     | 1         |
| Healthcare access and quality index     | None           | 2     | -1        |
| Lag distributed income per capita (I\$) | Log            | 3     | -1        |
| Socio-demographic Index                 | None           | 3     | 0         |
| Alcohol (litres per capita)             | None           | 3     | 0         |

## Hypertensive Heart Disease

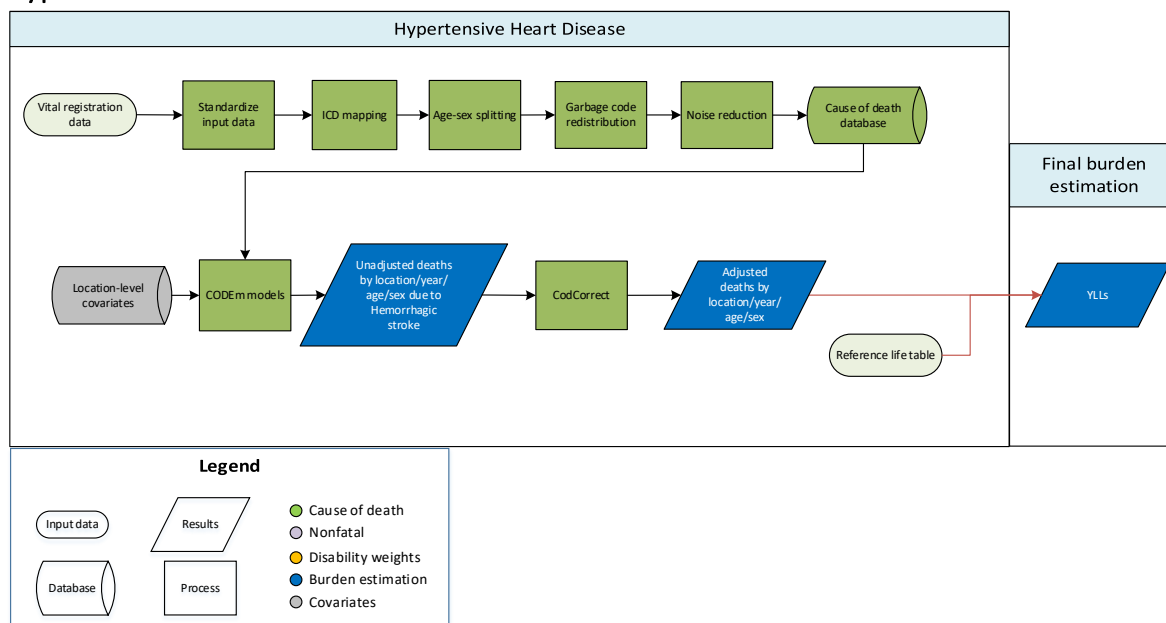

### Input data

Vital registration data were used to model hypertensive heart disease. We outliered ICD9 BTL data points, which were inconsistent with the rest of the data and created implausible time trends.

### Modelling strategy

We used a standard CODEm approach to model deaths from hypertensive heart disease. We have updated the covariates included in the ensemble modelling process (see Table). Otherwise, there have been no substantive changes from the approach used in GBD 2016.

**Table: Selected covariates for CODEm models, hypertensive heart disease**

| Covariate                               | Transformation | Level | Direction |
|-----------------------------------------|----------------|-------|-----------|
| Systolic blood pressure (mmHg)          | None           | 1     | 1         |
| Cholesterol (total, mean per capita)    | None           | 2     | 1         |
| Smoking prevalence                      | None           | 2     | 1         |
| Mean BMI                                | None           | 2     | 1         |
| Healthcare access and quality index     | None           | 2     | -1        |
| Lag distributed income per capita (I\$) | Log            | 3     | -1        |
| Socio-demographic Index                 | None           | 3     | 0         |
| Alcohol (litres per capita)             | None           | 3     | 0         |
| Omega-3 (kcal/capita, adjusted)         | Log            | 3     | -1        |
| Fruits (kcal/capita, adjusted)          | None           | 3     | -1        |
| Nuts and seeds (kcal/capita, adjusted)  | None           | 3     | -1        |
| PUFA (percent, adjusted)                | None           | 3     | -1        |
| Vegetables (kcal/capita, adjusted)      | None           | 3     | -1        |
| Trans fatty acid (percent)              | None           | 3     | 1         |

## Non-rheumatic valvular heart disease, non-rheumatic calcific aortic valve disease, non-rheumatic degenerative mitral valve disease, and other non-rheumatic valvular heart diseases

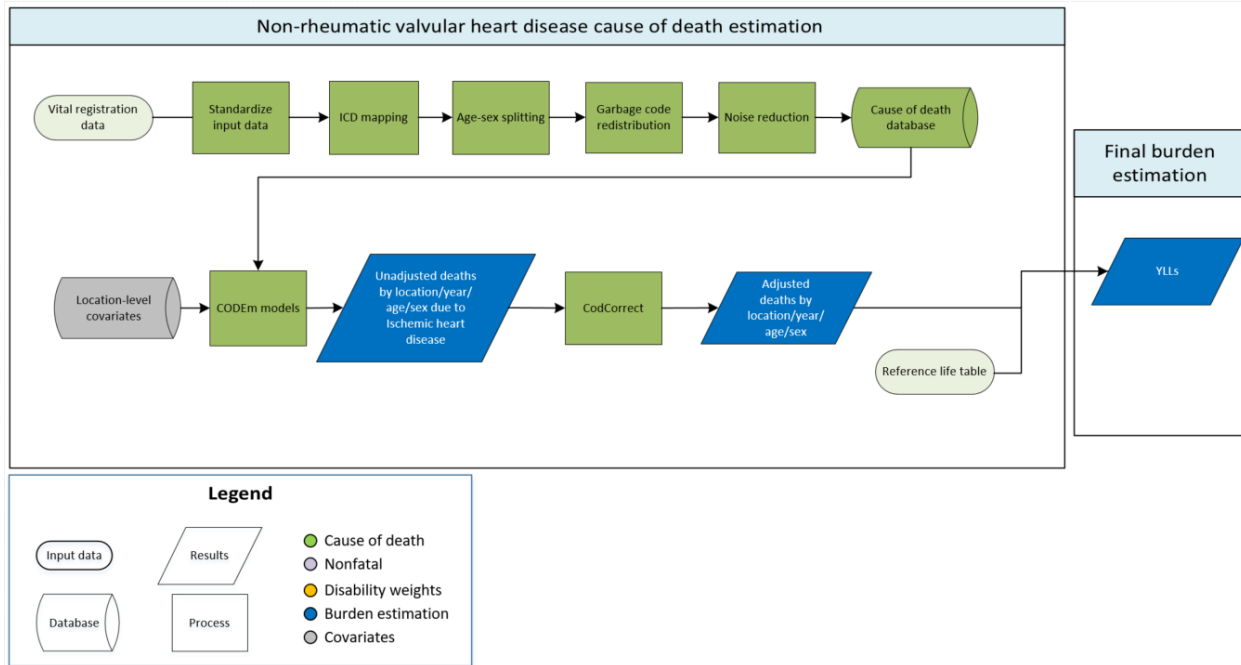

### Input data

Vital registration data were used to model non-rheumatic valvular heart disease, non-rheumatic calcific valve disease, non-rheumatic degenerative mitral valve disease, and other non-rheumatic valve diseases. ICD codes used for these causes are listed above. We also outliered ICD8, ICD9 BTL, and ICD10 tabulated data points which were inconsistent with the rest of the data and created implausible time trends. Data points from sources which were implausibly low in all age groups and data points that were causing the regional estimates to be improbably high were outliered.

### Modelling strategy

We used a standard CODEm approach to model deaths from non-rheumatic valvular heart disease and its three subcauses. The covariates used along with their transformations, importance levels, and imposed directions are reported by cause in the tables below.

**Table 1: Selected covariates for CODEm models, non-rheumatic valvular heart disease**

| Covariate                               | Transformation | Level | Direction |
|-----------------------------------------|----------------|-------|-----------|
| Smoking prevalence                      | None           | 1     | 1         |
| Systolic blood pressure (mmHg)          | None           | 1     | 1         |
| Cholesterol (total, mean per capita)    | None           | 2     | 1         |
| Mean BMI                                | None           | 2     | 1         |
| Fasting plasma glucose                  | None           | 2     | 1         |
| Healthcare access and quality index     | None           | 2     | -1        |
| Lag distributed income per capita (I\$) | Log            | 3     | -1        |
| Socio-demographic Index                 | None           | 3     | 0         |
| Alcohol (litres per capita)             | None           | 3     | 0         |

**Table 2: Selected covariates for CODEm models, non-rheumatic calcific aortic valve disease**

| Covariate                               | Transformation | Level | Direction |
|-----------------------------------------|----------------|-------|-----------|
| Smoking prevalence                      | None           | 1     | 1         |
| Systolic blood pressure (mmHg)          | None           | 1     | 1         |
| Cholesterol (total, mean per capita)    | None           | 2     | 1         |
| Mean BMI                                | None           | 2     | 1         |
| Fasting plasma glucose                  | None           | 2     | 1         |
| Healthcare access and quality index     | None           | 2     | -1        |
| Lag distributed income per capita (I\$) | Log            | 3     | -1        |
| Socio-demographic Index                 | None           | 3     | 0         |
| Alcohol (litres per capita)             | None           | 3     | 0         |

**Table 3: Selected covariates for CODEm models, non-rheumatic degenerative mitral valve disease**

| Covariate                               | Transformation | Level | Direction |
|-----------------------------------------|----------------|-------|-----------|
| Healthcare access and quality index     | None           | 1     | -1        |
| Lag distributed income per capita (I\$) | Log            | 1     | -1        |
| Socio-demographic Index                 | None           | 1     | 0         |

**Table 4: Selected covariates for CODEm models, other non-rheumatic valvular heart diseases**

| Covariate                          | Transformation | Level | Direction |
|------------------------------------|----------------|-------|-----------|
| Cardiovascular diseases SEV scalar | None           | 1     | 0         |

## Cardiomyopathy and Myocarditis

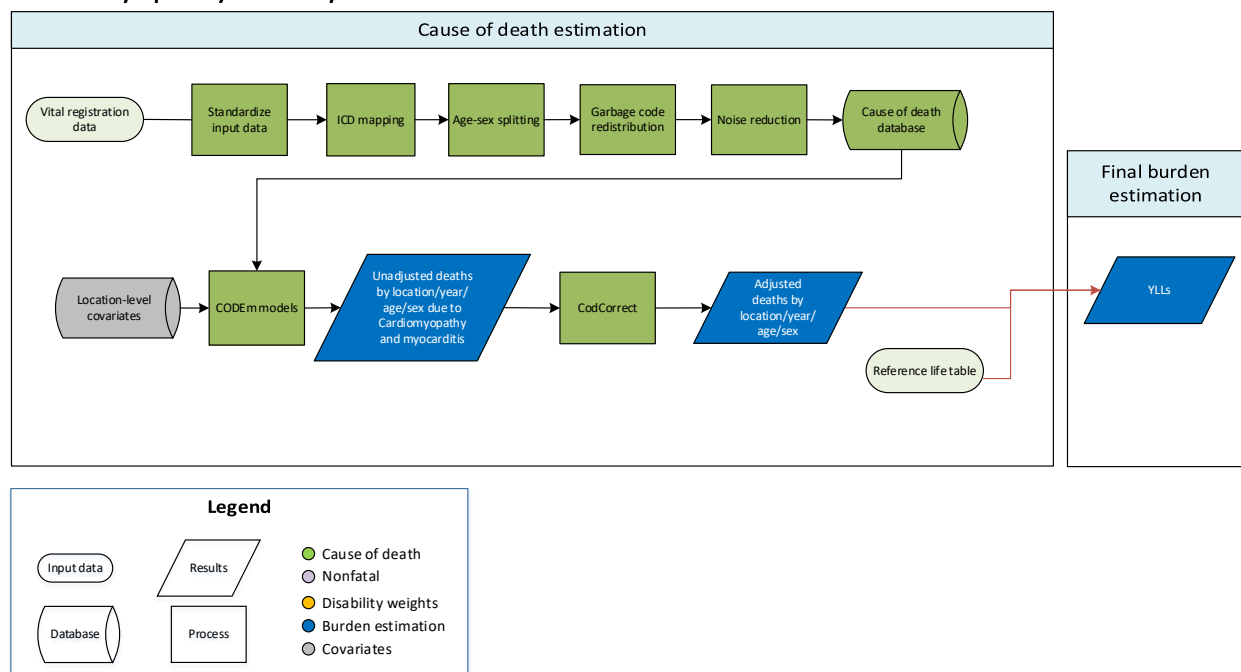

### Input data

Vital registration data were used to model deaths due to cardiomyopathy and myocarditis. We outliered data points in Central Asia, Central Europe, and Eastern Europe due to implausibly high values which we attributed to variation in local coding practices. We also outliered ICD8 data points in countries where they were discontinuous with other data in the time series.

### Modelling strategy

We used a standard CODEm approach to model deaths from cardiomyopathy and myocarditis. The covariates selected for inclusion in the CODEm modelling process can be found in the table below. There have been no substantive changes to the modelling strategy since GBD 2016.

**Table: Selected covariates for CODEm models, cardiomyopathy and myocarditis**

| Covariate                               | Transformation | Level | Direction |
|-----------------------------------------|----------------|-------|-----------|
| Summary exposure variable, CMP          | none           | 1     | 1         |
| Mean systolic blood pressure (mmHg)     | none           | 1     | 1         |
| Smoking prevalence                      | none           | 1     | 1         |
| Mean BMI (kg/m <sup>2</sup> )           | None           | 2     | 1         |
| Healthcare access and quality index     | none           | 2     | -1        |
| Lag distributed income per capita (I\$) | log            | 3     | 0         |
| Socio-demographic Index                 | none           | 3     | 0         |
| Alcohol (litres per capita)             | None           | 3     | 0         |

## Myocarditis

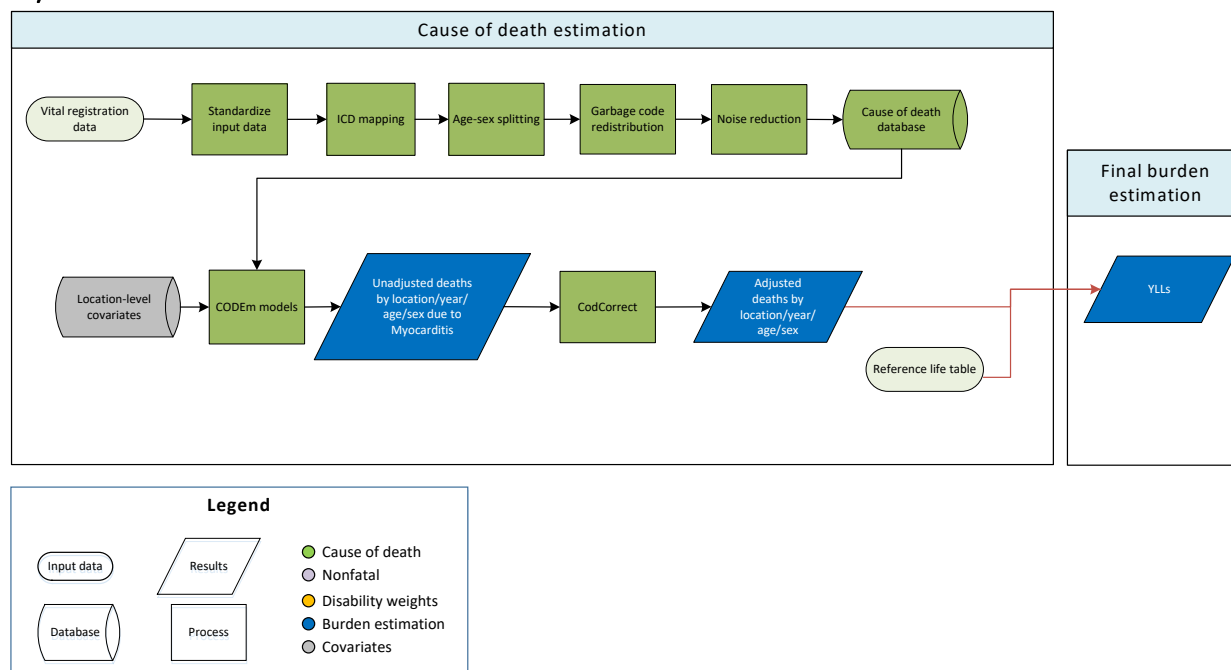

### Input data

Vital registration data were used to model deaths due to myocarditis.

### Modelling strategy

We used a standard CODEm approach to model deaths from myocarditis. The covariates selected for evaluation in the CODEm ensemble modelling process can be found in the table below. There have been no substantive changes to the modelling strategy since GBD 2016.

**Table: Selected covariates for CODEm models, myocarditis**

| Covariate                               | Transformation | Level | Direction |
|-----------------------------------------|----------------|-------|-----------|
| Summary exposure variable, CMP          | none           | 1     | 1         |
| Systolic blood pressure (mm Hg)         | none           | 1     | 1         |
| Healthcare access and quality index     | none           | 2     | -1        |
| Lag distributed income per capita (I\$) | log            | 3     | 0         |
| Socio-demographic Index                 | none           | 3     | 0         |

## Alcoholic Cardiomyopathy

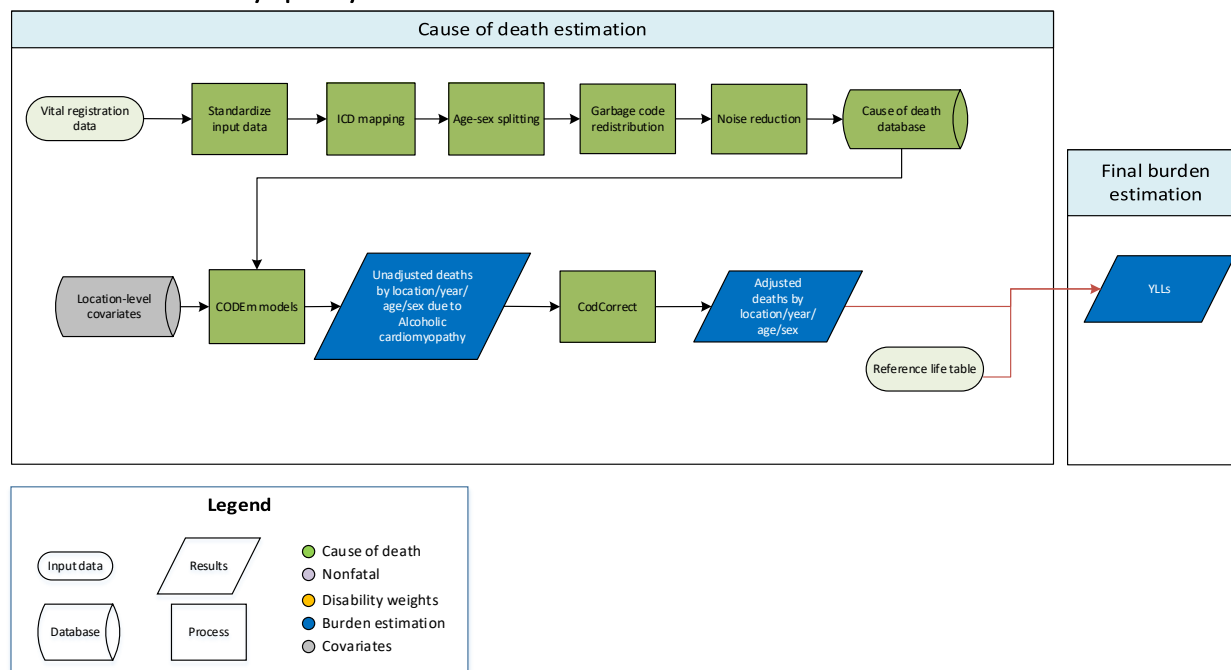

### Input data

Vital registration and verbal autopsy data were used to model deaths due to alcoholic cardiomyopathy. We outliered ICD9 data points in Cyprus that were implausibly high and discontinuous with the rest of the time series. We also dropped ICD9BTL data points in locations in Central and Eastern Europe where we were unable to disaggregate them appropriately.

### Modelling strategy

We used a standard CODEm approach to model deaths from alcoholic cardiomyopathy. The covariates selected for inclusion in the CODEm modelling process can be found in the table below. There have been no substantive changes from the approach used in GBD 2016.

**Table: Selected covariates for CODEm models, alcoholic cardiomyopathy**

| Covariate                               | Transformation | Level | Direction |
|-----------------------------------------|----------------|-------|-----------|
| Summary exposure variable, CMP          | none           | 1     | 1         |
| Smoking prevalence                      | none           | 1     | 1         |
| Alcohol (litres per capita)             | none           | 1     | 1         |
| Healthcare access and quality index     | none           | 2     | -1        |
| Lag distributed income per capita (I\$) | log            | 3     | 0         |
| Socio-demographic Index                 | none           | 3     | 0         |

## Other Cardiomyopathy

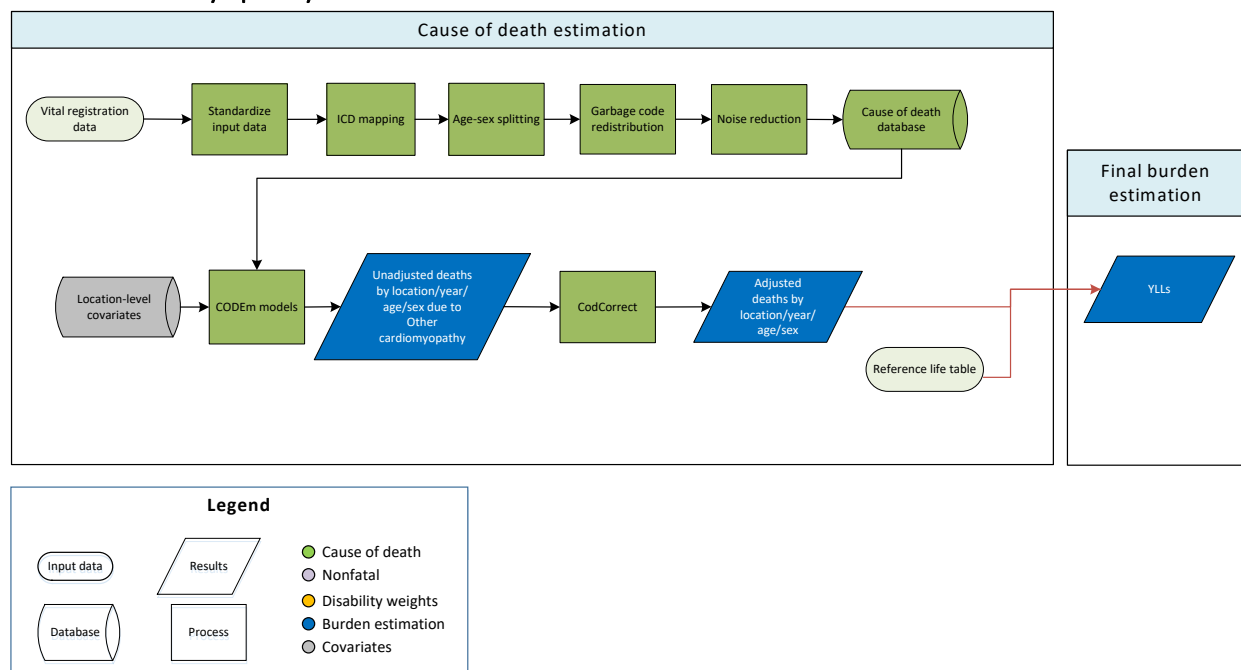

### Input data

Vital registration data were used to model deaths due to other cardiomyopathy. We outliered data points in Central Asia and Central and Eastern Europe due to implausibly high values which we attributed to variation in local coding practices after review with experts.

### Modelling strategy

We used a standard CODEm approach to model deaths from other cardiomyopathy. The covariates selected for inclusion in the CODEm modelling process can be found in the table below. There have been no substantive changes to the modelling process since GBD 2016.

**Table: Selected covariates for CODEm models, other cardiomyopathy**

| Covariate                               | Transformation | Level | Direction |
|-----------------------------------------|----------------|-------|-----------|
| Summary exposure variable, CMP          | none           | 1     | 1         |
| Systolic blood pressure (mmHg)          | none           | 1     | 1         |
| Smoking prevalence                      | none           | 1     | 1         |
| Body mass index (kg/m <sup>2</sup> )    | none           | 2     | 1         |
| Healthcare access and quality index     | none           | 2     | -1        |
| Lag distributed income per capita (I\$) | log            | 3     | 0         |
| Socio-demographic Index                 | none           | 3     | 0         |



# Atrial Fibrillation and Flutter

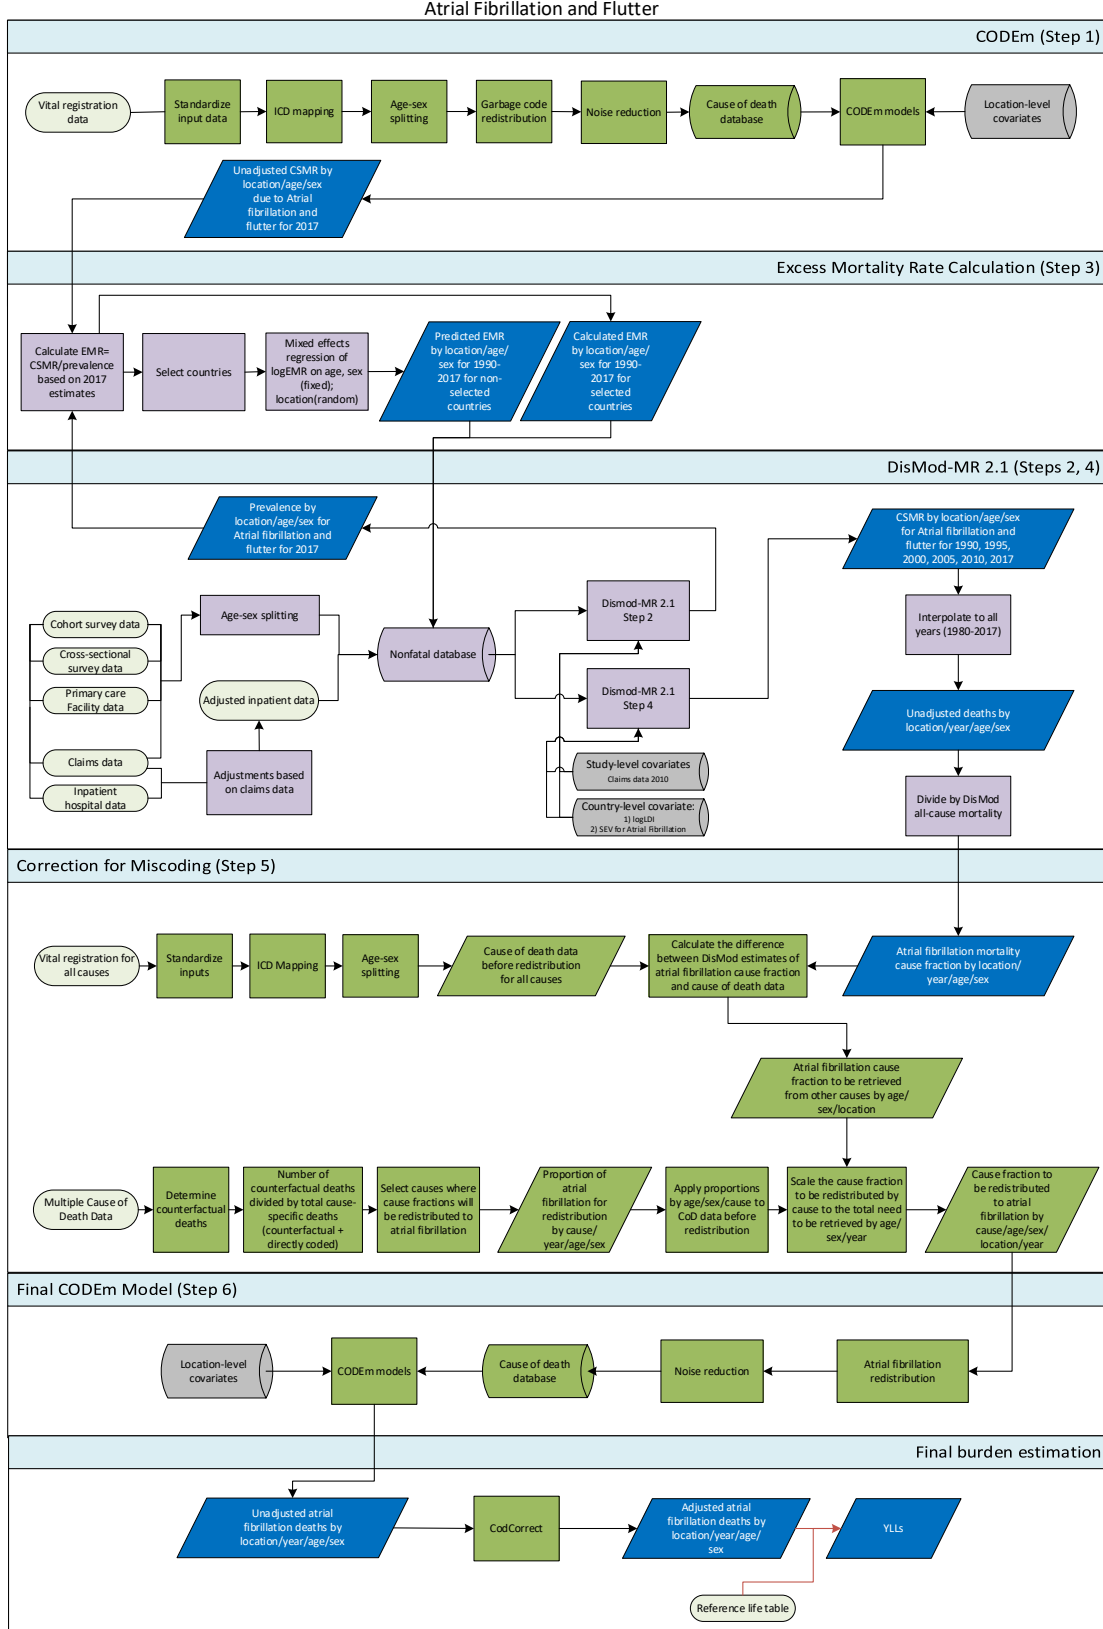

## Input data

Vital registration (VR) data: We outliered ICD8 and ICD9 data points that were discontinuous from other data in the time series and created an unlikely time trend. We also outliered data points that were implausibly low in multiple age groups.

## Modelling strategy

In order to address changes in coding practices for atrial fibrillation, we used an integrated approach that combined DisMod-MR and CODEm models to estimate deaths from atrial fibrillation and flutter. This approach allowed us to adjust estimates to more accurately reflect the number of deaths for which atrial fibrillation was the true underlying cause of death.

The modelling steps are illustrated in the above flowchart. Covariates included in both the DisMod-MR 2.1 and CODEm models can be found in the table below. In Step 1, we estimated deaths for atrial fibrillation using a standard CODEm approach. In Step 2, we estimated prevalence rates in DisMod-MR 2.1 using data from published reports of cross-sectional and cohort surveys, as well as primary care facility data. We also used claims data covering inpatient and outpatient visits for the United States along with inpatient hospital data from 163 locations in 15 countries. For GBD 2017, inpatient hospital data were adjusted using age- and sex-specific information from USA claims data for: 1) readmission within one year; 2) primary diagnosis code to secondary codes; and, 3) the ratio of inpatient to outpatient visits. We set priors of no remission and no excess mortality prior to age 30.

In Step 3, we calculated the excess mortality rate (EMR) for 2017 (defined as the cause-specific mortality rate (CSMR) estimated from CODEm divided by the prevalence rate from DisMod-MR 2.1). We then selected 17 countries based on four conditions: 1) ranking of 4 or 5 stars on the newly developed system for assessing the quality of VR data; 2) prevalence data available from the literature were included in the DisMod-MR 2.1 estimation; 3) prevalence rate  $\geq 0.005$ ; and, 4) CSMR  $\geq 0.00002$ . Using information from these countries as input data, we ran a linear mixed-effects regression of logEMR on sex, age, and location. Sex and age were treated as fixed effects for the regression, while location was considered a random effect. We then predicted age- and sex-specific EMR using the results of this regression for all non-selected countries. Countries included in the regression were assigned their directly calculated values. These EMR data points were assigned to the time period 1990–2017 and uploaded into the nonfatal database in order to be used in modelling.

In Step 4, we reran DisMod-MR 2.1 including the EMR estimated in Step 3 as input data using the same priors as in Step 2 to obtain CSMR estimates from DisMod-MR 2.1 that are consistent with the available data for incidence and prevalence. As DisMod-MR 2.1 only generates estimates for six years (1990, 1995, 2000, 2005, 2010, 2017), we interpolated using a log-linear approach for 1990–2017. Estimates for 1980–1990 were generated via regression on the entire time series, using Socio-demographic Index as a predictor.

In Step 5, the CSMR estimates were divided by the all-cause mortality estimates used in DisMod-MR 2.1 to calculate the cause fraction for atrial fibrillation and flutter. We then calculated the difference between the cause fraction estimated by DisMod-MR 2.1 and the cause fraction in the VR data

generated by the Cause of Death data preparation process. This yielded the cause fraction that would need to be retrieved from other causes via the process described in Section 2.8: Correction for miscoding of Alzheimer’s and other dementias and Parkinson’s disease. After this correction process, the cause fraction data are processed through the standard redistribution and noise reduction processes.

In Step 6, these data are then used as inputs for a final CODEm model, using the same covariates as the model in Step 1. The results from the CODEm model are processed through CoDCorrect; these post-CoDCorrected results are the final estimates for cause-specific mortality for atrial fibrillation and flutter.

CODEm Covariates, atrial fibrillation and flutter

| Covariate                                      | Transformation | Level | Direction |
|------------------------------------------------|----------------|-------|-----------|
| Summary exposure variable, atrial fibrillation | None           | 1     | 1         |
| Cholesterol (total, mean per capita)           | None           | 1     | 1         |
| Smoking prevalence                             | None           | 1     | 1         |
| Systolic blood pressure (mmHg)                 | None           | 1     | 1         |
| Mean BMI                                       | None           | 2     | 1         |
| Elevation over 1500m (proportion)              | None           | 2     | -1        |
| Fasting plasma glucose                         | None           | 2     | 1         |
| Outdoor pollution (PM <sub>2.5</sub> )         | None           | 2     | 1         |
| Indoor air pollution                           | None           | 2     | 1         |
| Healthcare Access and Quality Index            | None           | 2     | -1        |
| Lag distributed income per capita (I\$)        | Log            | 3     | -1        |
| Socio-demographic Index                        | None           | 3     | 0         |
| Omega-3 (kcal/capita, adjusted)                | Log            | 3     | -1        |
| Fruits (kcal/capita, adjusted)                 | None           | 3     | -1        |
| Vegetables (kcal/capita, adjusted)             | None           | 3     | -1        |
| Nuts and seeds (kcal/capita, adjusted)         | None           | 3     | -1        |
| Whole grains (kcal/capita, adjusted)           | None           | 3     | -1        |
| Pulses/legumes (kcal/capita, adjusted)         | None           | 3     | -1        |
| PUFA adjusted (percent)                        | None           | 3     | -1        |
| Alcohol (litres per capita)                    | None           | 3     | 0         |
| Trans fatty acid                               | None           | 1     | 1         |

DisMod Covariates – Step 2

| Covariate                           | Parameter             | Beta                      | Exponentiated beta  |
|-------------------------------------|-----------------------|---------------------------|---------------------|
| All MarketScan, year 2010           | Prevalence            | -0.077 (-0.099 to -0.051) | 0.93 (0.91 to 0.95) |
| SEV scalar: Atrial fibrillation     | Prevalence            | 0.75 (0.75 to 0.75)       | 2.12 (2.12 to 2.12) |
| Healthcare access and quality index | Excess mortality rate | -0.11 (-0.13 to -0.088)   | 0.90 (0.88 to 0.92) |

DisMod Covariates – Step 4

| Covariate                       | Parameter             | Beta                    | Exponentiated beta  |
|---------------------------------|-----------------------|-------------------------|---------------------|
| All MarketScan, year 2010       | Prevalence            | 0.017 (-0.013 to 0.040) | 1.02 (0.99 to 1.04) |
| SEV scalar: Atrial fibrillation | Prevalence            | 0.75 (0.75 to 0.75)     | 2.12 (2.12 to 2.12) |
| LDI (I\$ per capita)            | Excess mortality rate | -0.1 (-0.1 to -0.1)     | 0.90 (0.90 to 0.90) |

## Aortic Aneurysm

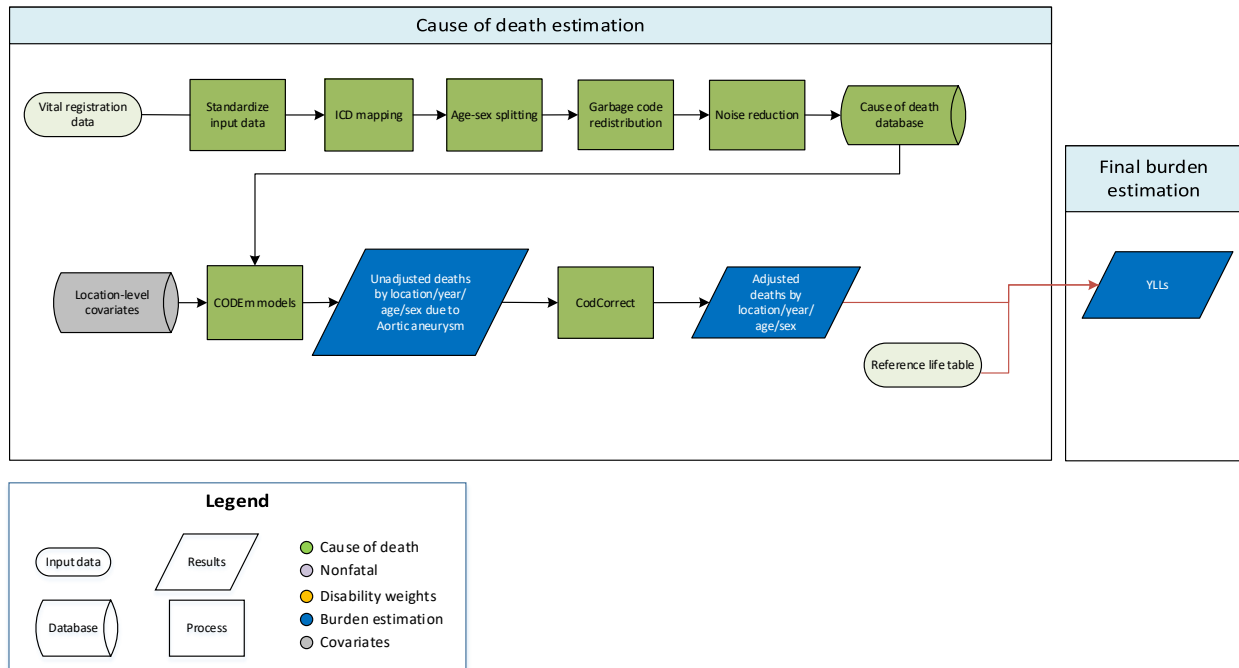

### Input data

Vital registration data were used to model this cause. We outliered data in Oman as they were improbably high in comparison with the rest of the region. We also outliered ICD8 data that were discontinuous with the rest of the time series and created implausible time trends.

### Modelling strategy

We used a standard CODEm approach to model deaths from aortic aneurysm. Please see the following table for a list of covariates selected for evaluation in the ensemble modelling process. There have been no substantive changes from the approach used in GBD 2016.

**Table: Selected covariates for CODEm models, aortic aneurysm**

| Covariate                                  | Transformation | Level | Direction |
|--------------------------------------------|----------------|-------|-----------|
| Summary exposure variable, aortic aneurysm | None           | 1     | 1         |
| Cholesterol (total, mean per capita)       | None           | 1     | 1         |
| Cumulative cigarettes (10 yrs)             | None           | 1     | 1         |
| Systolic blood pressure (mmHg)             | None           | 1     | 1         |
| Mean BMI                                   | None           | 2     | 1         |
| Healthcare access and quality index        | None           | 2     | -1        |
| Lag distributed income per capita (I\$)    | Log            | 3     | -1        |
| Socio-demographic Index                    | None           | 3     | 0         |
| Omega-3 (kcal/capita, adjusted)            | Log            | 3     | -1        |
| Fruits (kcal/capita, adjusted)             | None           | 3     | -1        |
| Vegetables (kcal/capita, adjusted)         | None           | 3     | -1        |
| Nuts and seeds (kcal/capita, adjusted)     | None           | 3     | -1        |
| Pulses/legumes (kcal/capita, adjusted)     | None           | 3     | -1        |
| PUFA adjusted (percent)                    | None           | 3     | -1        |
| Alcohol (litres per capita)                | None           | 3     | 0         |

## Peripheral Artery Disease

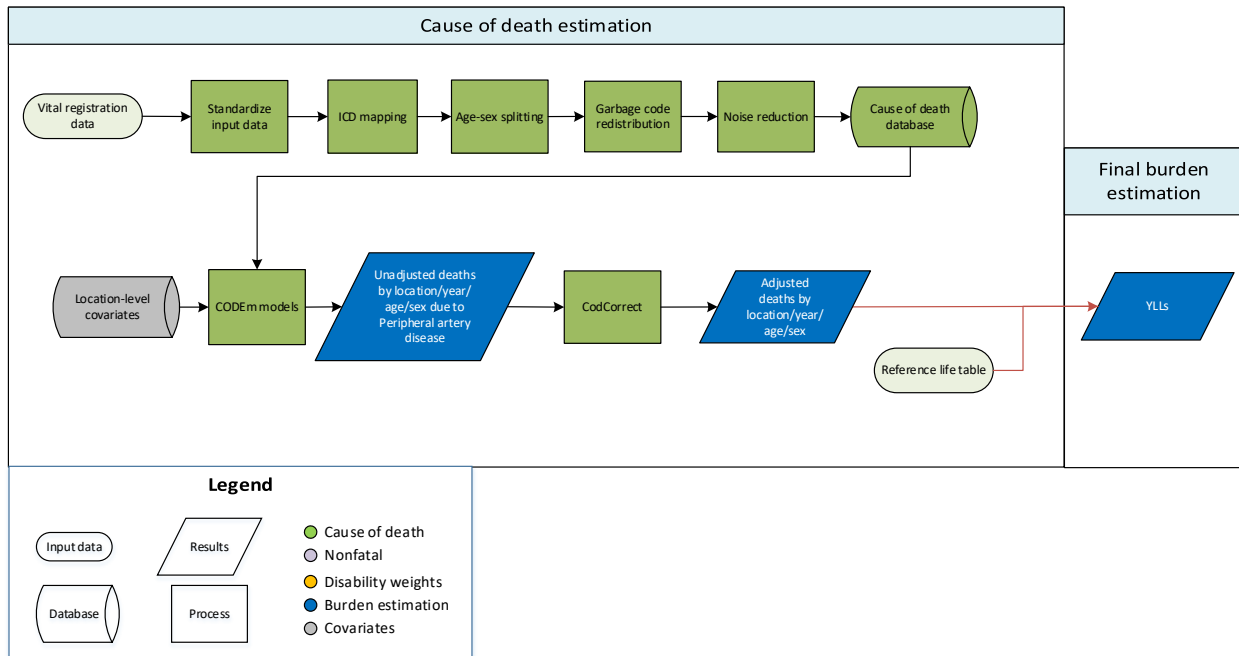

### Input data

Vital registration data were used to model peripheral artery disease. We outliered all data points with <1 death in Egypt per expert review.

### Modelling strategy

We used a standard CODEm approach to model deaths from peripheral artery disease. Covariates selected for inclusion in the ensemble modelling process are listed in the table below. There have been no substantive changes from the approach used in GBD 2016.

**Table: Selected covariates for CODEm models, peripheral artery disease**

| Covariate                                 | Transformation | Level | Direction |
|-------------------------------------------|----------------|-------|-----------|
| Summary exposure variable, PAD            | None           | 1     | 1         |
| Systolic blood pressure (mmHg)            | None           | 1     | 1         |
| Cholesterol (total, mean per capita)      | None           | 1     | 1         |
| Smoking prevalence                        | None           | 1     | 1         |
| Mean body mass index (kg/m <sup>2</sup> ) | None           | 2     | 1         |
| Healthcare access and quality index       | None           | 2     | -1        |
| Diabetes fasting plasma glucose (mmol/L)  | None           | 2     | 1         |
| Lag distributed income per capita (I\$)   | Log            | 3     | -1        |
| Socio-demographic Index                   | None           | 3     | 0         |
| Omega-3 (kcal/capita, adjusted)           | Log            | 3     | -1        |
| Fruits (kcal/capita, adjusted)            | None           | 3     | -1        |
| Vegetables (kcal/capita, adjusted)        | None           | 3     | -1        |
| Nuts and seeds (kcal/capita, adjusted)    | None           | 3     | -1        |
| Whole grains (kcal/capita, adjusted)      | None           | 3     | -1        |
| Pulses/legumes (kcal/capita, adjusted)    | None           | 3     | -1        |
| PUFA adjusted (percent)                   | None           | 3     | -1        |
| Trans fatty acid (percent)                | None           | 3     | 1         |
| Alcohol (litres per capita)               | None           | 3     | 0         |



## Endocarditis

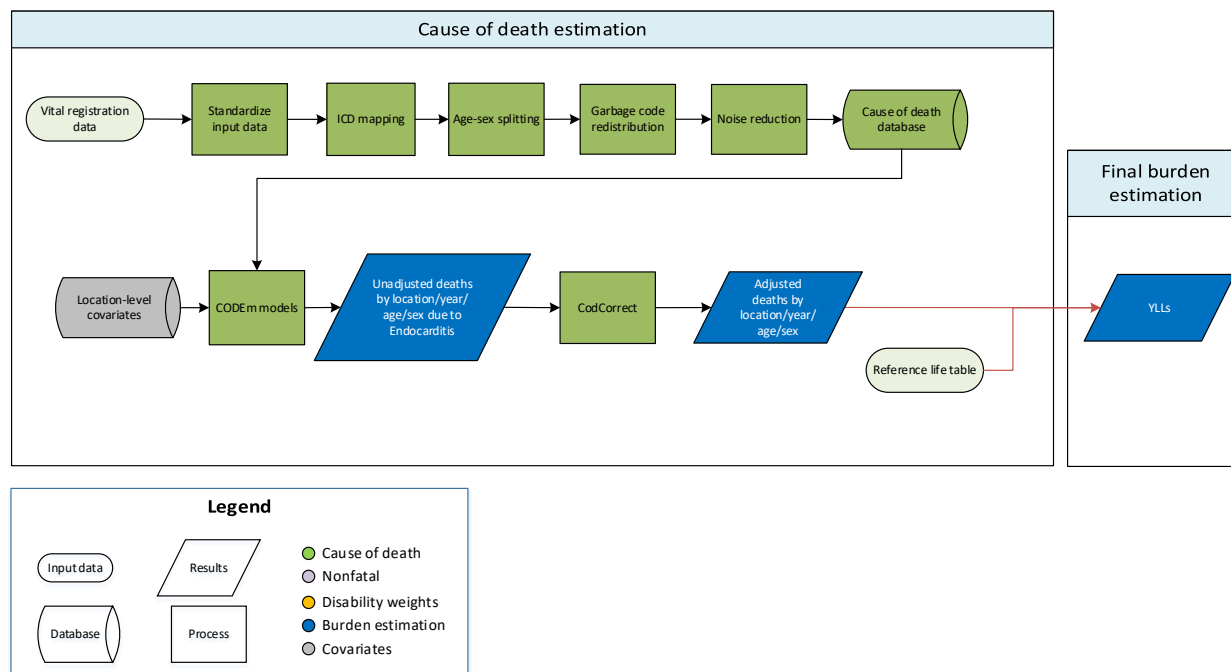

### Input data

Vital registration and surveillance data were used to model endocarditis. We outliered vital registration data in Mozambique as these were non-representative for sub-Saharan Africa and were causing regional estimates to be implausibly low. We also outliered ICD8 data that were discontinuous from the rest of the data series and created an implausible time trend.

### Modelling strategy

We used a standard CODEm approach to model deaths from endocarditis. Covariates selected for inclusion in the CODEm ensemble modelling process are listed in the table below. There have been no substantive changes from the approach used in GBD 2016.

**Table: Selected covariates for CODEm models, endocarditis**

| Covariate                               | Transformation | Level | Direction |
|-----------------------------------------|----------------|-------|-----------|
| Summary exposure variable, endocarditis | None           | 1     | 1         |
| Improved water (proportion)             | None           | 1     | -1        |
| Sanitation (proportion with access)     | None           | 1     | -1        |
| Healthcare access and quality index     | None           | 1     | -1        |
| Lag distributed income per capita (I\$) | Log            | 3     | -1        |
| Socio-demographic Index                 | None           | 3     | 0         |

## Other Cardiovascular and Circulatory Diseases

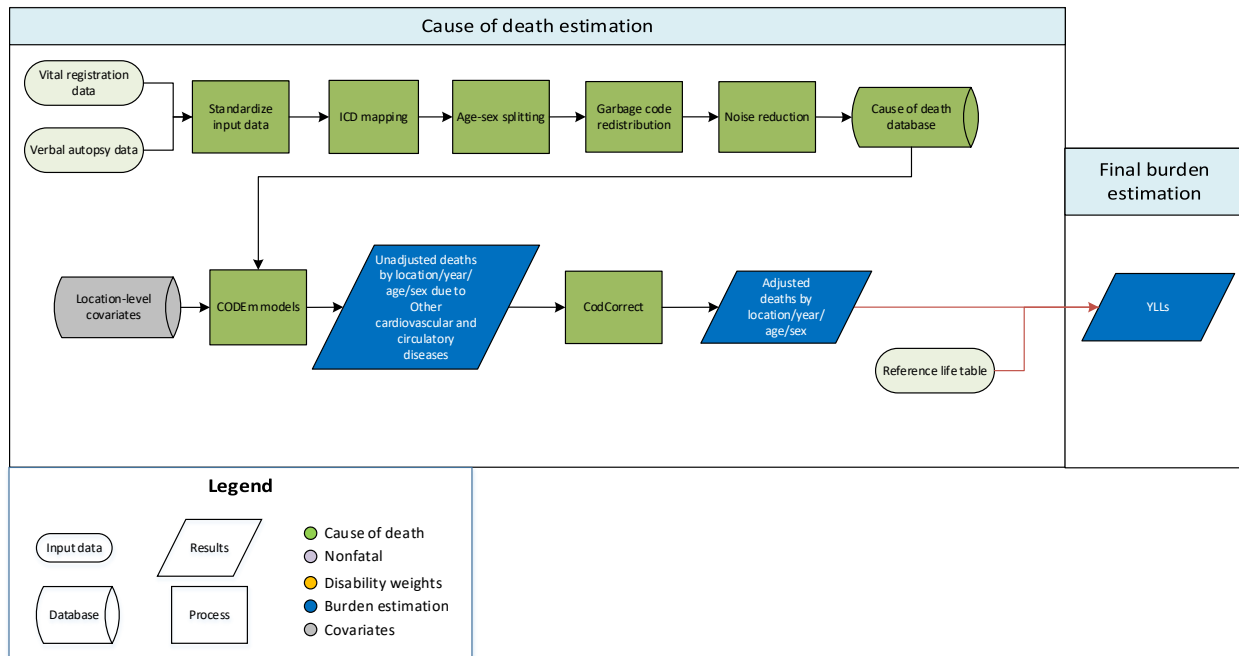

### Input data

Vital registration and verbal autopsy data were used to model other cardiovascular and circulatory diseases. We outliered ICD8 and ICD9 BTL data points that were inconsistent with the rest of the data and created implausible time trends. We also outliered ICD8 data points which were not nationally representative.

### Modelling strategy

We used a standard CODEm approach to model deaths from other circulatory and cardiovascular diseases. Covariates in the selected for inclusion in the ensemble model are listed in the table below. For GBD 2017, we have generated separate estimates for non-rheumatic valvular diseases, which were previously estimated as part of the other cardiovascular disease. A description of the modelling process for these causes can be found elsewhere in this appendix. Other than this, there have been no substantive changes from the approach used in GBD 2016.

**Table: Selected covariates for CODEm models, cardiovascular diseases**

| Covariate                                  | Transformation | Level | Direction |
|--------------------------------------------|----------------|-------|-----------|
| Summary exposure variable, Other CVD       | None           | 1     | 1         |
| Cholesterol (total, mean per capita)       | None           | 1     | 1         |
| Smoking prevalence                         | None           | 1     | 1         |
| Systolic blood pressure (mmHg)             | None           | 1     | 1         |
| Trans fatty acid (percent)                 | None           | 1     | 1         |
| Mean BMI                                   | None           | 2     | 1         |
| Elevation over 1500m (proportion)          | None           | 2     | -1        |
| Fasting plasma glucose (mmol/L)            | None           | 2     | 1         |
| Indoor air pollution (all fuel types)      | None           | 2     | 1         |
| Outdoor air pollution (PM <sub>2.5</sub> ) | None           | 2     | 1         |
| Healthcare access and quality index        | None           | 2     | -1        |
| Lag distributed income per capita (I\$)    | Log            | 3     | -1        |
| Socio-demographic Index                    | None           | 3     | 0         |
| Omega-3 (kcal/capita, adjusted)            | Log            | 3     | -1        |
| Fruits (kcal/capita, adjusted)             | None           | 3     | -1        |
| Vegetables (kcal/capita, adjusted)         | None           | 3     | -1        |
| Nuts and seeds (kcal/capita, adjusted)     | None           | 3     | -1        |
| Whole grains (kcal/capita, adjusted)       | None           | 3     | -1        |
| Pulses/legumes (kcal/capita, adjusted)     | None           | 3     | -1        |
| PUFA adjusted (percent)                    | None           | 3     | -1        |
| Alcohol (litres per capita)                | None           | 3     | 0         |

## Chronic Respiratory Diseases

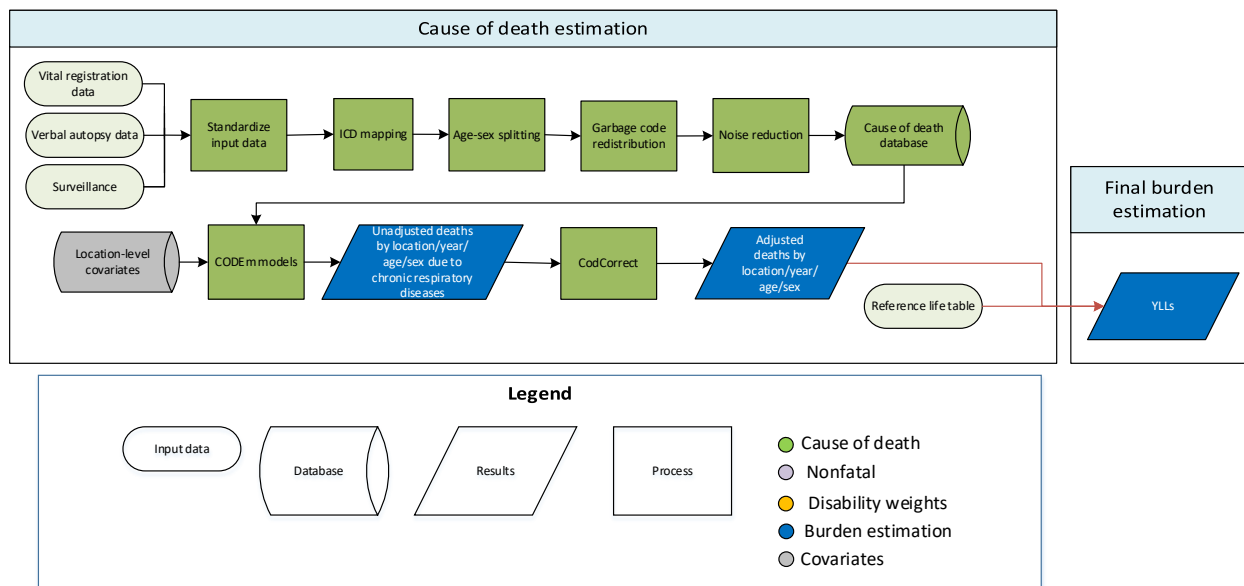

### Input data

Sources used to estimate chronic respiratory disease mortality included vital registration, verbal autopsy, and surveillance data from China. Our outlier criteria excluded data points that (1) were implausibly high or low, (2) substantially conflicted with established age or temporal patterns, or (3) significantly conflicted with other data sources conducted from the same locations or locations with similar characteristics (ie, Socio-demographic Index).

### Modelling strategy

The standard CODEm modelling approach was applied to estimate deaths due to chronic respiratory diseases. Chronic respiratory diseases served as the parent cause to chronic obstructive pulmonary disease, pneumoconiosis (including silicosis, asbestosis, coal worker’s pneumoconiosis, other pneumoconiosis), asthma, interstitial lung disease and pulmonary sarcoidosis, and other chronic respiratory diseases. Functionally, this means the death estimates for chronic respiratory diseases serve as a “parent” envelope into which the “child” causes are squeezed by the CodCorrect algorithm. This approach allows us to use a broader range of data – specifically verbal autopsy data – which cannot be accurately mapped to specific respiratory diseases.

Separate models were conducted for male and female mortality, and the age range for both models was 1 to 95+ years. The same covariates from GBD 2016 were used.

| Level | Covariate                                                | Direction |
|-------|----------------------------------------------------------|-----------|
| 1     | log-transformed SEV scalar: chronic respiratory diseases | +         |
|       | cumulative cigarettes (10 years)                         | +         |

|   |                                                                          |   |
|---|--------------------------------------------------------------------------|---|
|   | cumulative cigarettes (5 years)                                          | + |
|   | healthcare quality and access index                                      | - |
| 2 | smoking prevalence                                                       | + |
|   | indoor air pollution (all cooking fuels)                                 | + |
|   | outdoor air pollution (PM <sub>2.5</sub> )                               | + |
|   | population above 1500m elevation (proportion)                            | + |
| 3 | log LDI (I\$ per capita)                                                 | - |
|   | education (years per capita)                                             | - |
|   | Socio-demographic Index                                                  | - |
|   | population between 500 and 1,500m elevation (proportion)                 | + |
|   | population density over 1,000 people/kilometer <sup>2</sup> (proportion) | + |

## Chronic Obstructive Pulmonary Disease

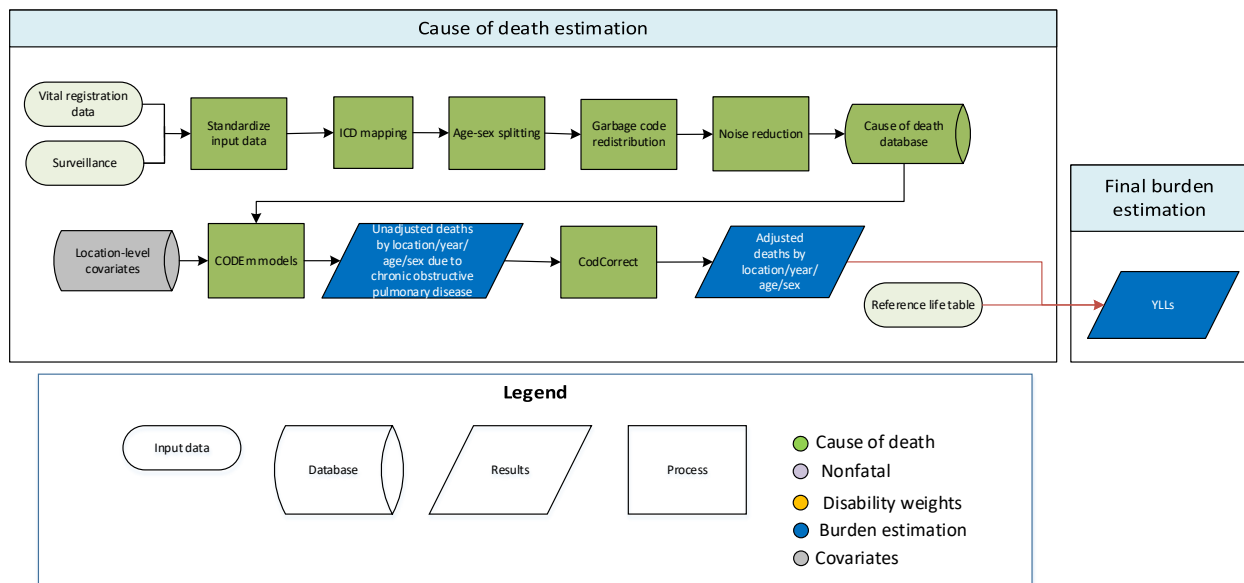

### Input data

Data used to estimate chronic obstructive pulmonary disease (COPD) mortality included vital registration and surveillance data from the cause of death (COD) database. Our outlier criteria excluded data points that (1) were implausibly high or low, (2) substantially conflicted with established age or temporal patterns, or (3) significantly conflicted with other data sources conducted from the same locations or locations with similar characteristics (ie, Socio-demographic Index).

### Modelling strategy

The standard CODEm modelling approach was applied to estimate deaths due to COPD. Separate models were conducted for male and female mortality, and the age range for both models was 1-95+ years. The mortality estimates from the COPD models were ultimately fit into the chronic respiratory diseases envelope.

The same covariates from GBD 2016 were used, but outdoor air pollution was moved to level 1.

| Level | Covariate                                  | Direction |
|-------|--------------------------------------------|-----------|
| 1     | log-transformed SEV scalar: COPD           | +         |
|       | cumulative cigarettes (10 years)           | +         |
|       | cumulative cigarettes (5 years)            | +         |
|       | elevation over 1,500m (proportion)         | +         |
|       | outdoor air pollution (PM <sub>2.5</sub> ) | +         |
| 2     | smoking prevalence                         | +         |

|   |                                          |   |
|---|------------------------------------------|---|
|   | indoor air pollution (all cooking fuels) | + |
|   | healthcare access and quality index      | - |
| 3 | Socio-demographic Index                  | - |
|   | log LDI (I\$ per capita)                 | - |
|   | education (years per capita)             | - |

## Pneumoconiosis Diseases: Silicosis, Asbestosis, Coal Worker’s Pneumoconiosis, and Other Pneumoconiosis

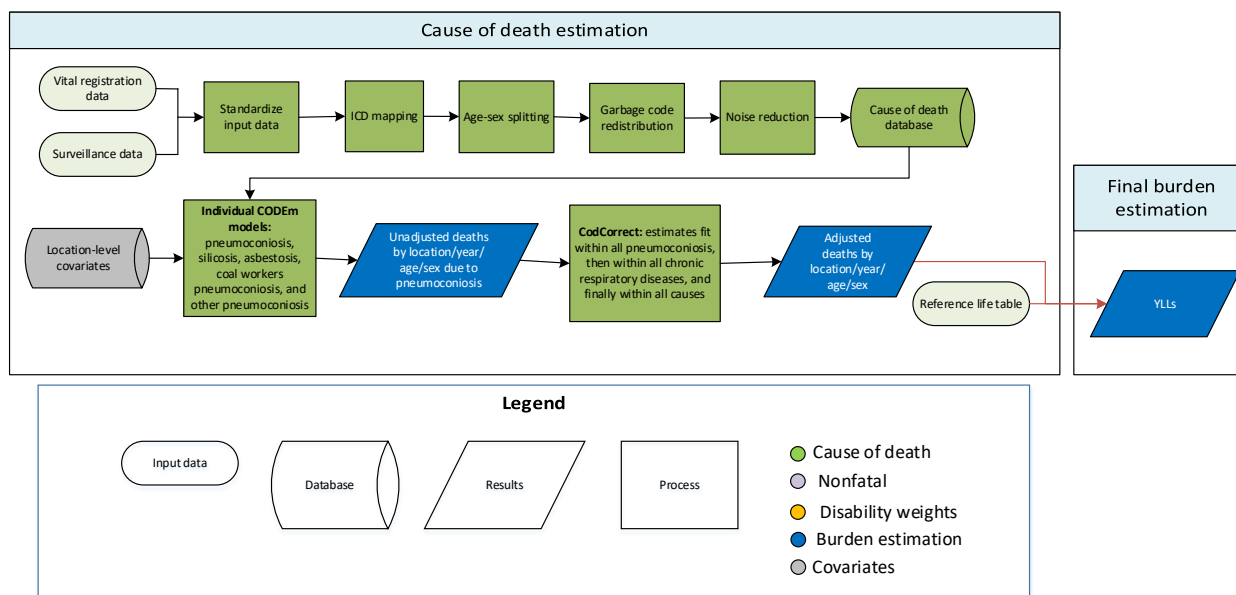

### Input data

Data used to estimate pneumoconiosis diseases mortality included vital registration and China mortality surveillance data from the cause of death (COD) database. Our outlier criteria excluded data points that (1) were implausibly high or low, (2) substantially conflicted with established age or temporal patterns, or (3) significantly conflicted with other data sources conducted from the same locations or locations with similar characteristics (ie, socio-demographic index).

### Modelling strategy

The standard CODEm modelling approach was applied to estimate deaths due to pneumoconiosis diseases. Separate models were conducted for male and female mortality, and the age range for both models was 15–95+ years. The mortality estimates from pneumoconiosis disease models were ultimately fit into the chronic respiratory envelope, which is the parent cause for pneumoconiosis disease. The pneumoconiosis model serves as an envelope for silicosis, asbestosis, coal worker’s pneumoconiosis, and other pneumoconiosis. In CoDCorrect, estimates are first fit within all pneumoconiosis, then within all chronic respiratory disease, before being fit to the all-cause mortality envelope.

For the most part, the same covariates from GBD 2016 were used. The log-transformed SEV scalars were dropped, however, because the associated risk factors for GBD are occupational silica, asbestos, and particulate exposure, which each have a population attributable fraction (PAF) of 1 for pneumoconiosis. When PAF is equal to one,  $SEV=1/(1-PAF)$  is undefined. Subnational adjustments were also made to the coal, asbestos, and gold covariates.

The following table indicates covariates used in the pneumoconiosis models, their level, and direction:



| <b>Level</b> | <b>Covariate</b>                         | <b>Direction</b> |
|--------------|------------------------------------------|------------------|
| 1            | asbestos consumption per capita*         | +                |
|              | coal production per capita*              | +                |
|              | gold production per capita*              | +                |
| 2            | smoking prevalence                       | +                |
|              | indoor air pollution (all cooking fuels) | +                |
|              | cumulative cigarettes (5 years)          | +                |
|              | elevation over 1,500m (proportion)       | +                |
|              | elevation 500 to 1,500m (proportion)     | +                |
|              | healthcare access and quality index      | -                |
| 3            | log LDI (I\$ per capita)                 | -                |
|              | education (years per capita)             | -                |
|              | Socio-demographic Index                  | -                |

\* asbestos, coal, and gold covariates are each only used in a subset of the pneumoconiosis models, as follows: all three are included in the parent all pneumoconiosis model, asbestos consumption is included in the asbestosis model, coal production is included in the coal worker’s pneumoconiosis model, and gold production is included in the silicosis model.

## Asthma

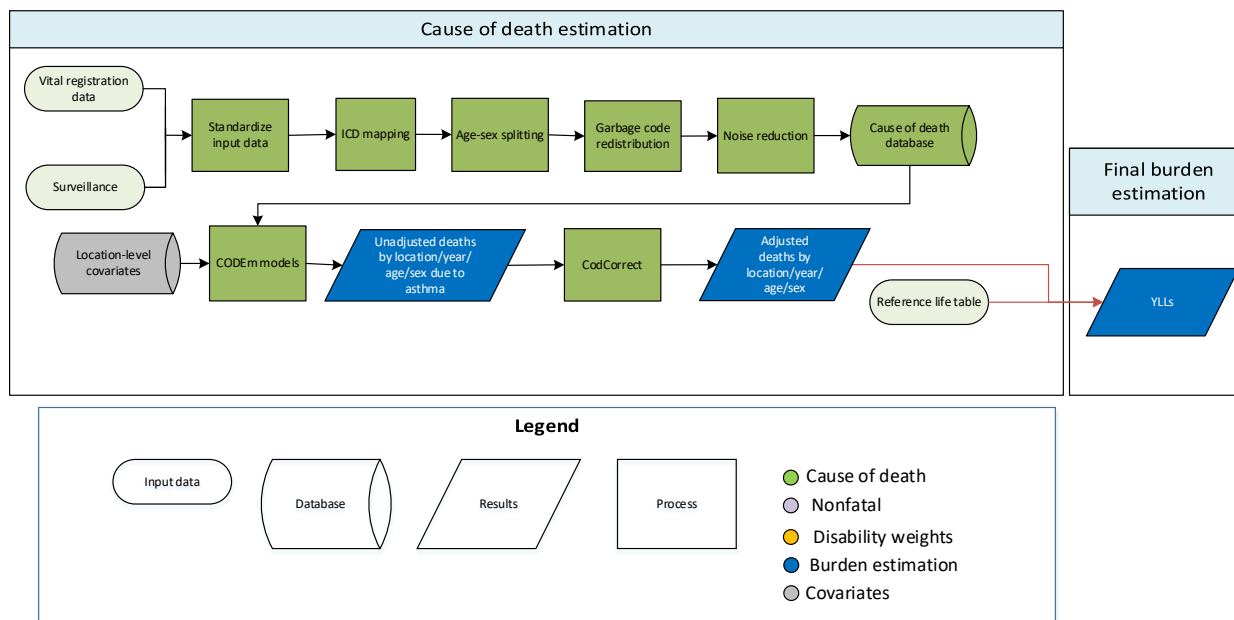

### Input data

Data used to estimate asthma mortality included vital registration and surveillance data from the cause of death (COD) database. Verbal autopsy data were not included and were instead mapped to the parent model (chronic respiratory diseases). Our outlier criteria excluded data points that (1) were implausibly high or low relative to global or regional patterns, (2) substantially conflicted with established age or temporal patterns, or (3) significantly conflicted with other data sources conducted from the same locations or locations with similar characteristics (ie, Socio-demographic Index).

### Modelling strategy

The standard CODEm modelling approach was applied to estimate deaths due to asthma. Separate models were conducted for male and female mortality, and the age range for both models was 1–95+ years. The mortality estimates from the asthma models were ultimately fit into the chronic respiratory diseases envelope.

The same covariates from GBD 2016 were used.

| Level | Covariate                           | Direction |
|-------|-------------------------------------|-----------|
| 1     | log-transformed SEV scalar: asthma  | +         |
|       | cumulative cigarettes (10 years)    | +         |
|       | cumulative cigarettes (5 years)     | +         |
|       | healthcare access and quality index | -         |

|   |                                            |   |
|---|--------------------------------------------|---|
| 2 | smoking prevalence                         | + |
|   | indoor air pollution (all cooking fuels)   | + |
|   | outdoor air pollution (PM <sub>2.5</sub> ) | + |
| 3 | log LDI (I\$ per capita)                   | - |
|   | education (years per capita)               | - |
|   | Socio-demographic Index                    | - |

## Interstitial Lung Disease and Pulmonary Sarcoidosis

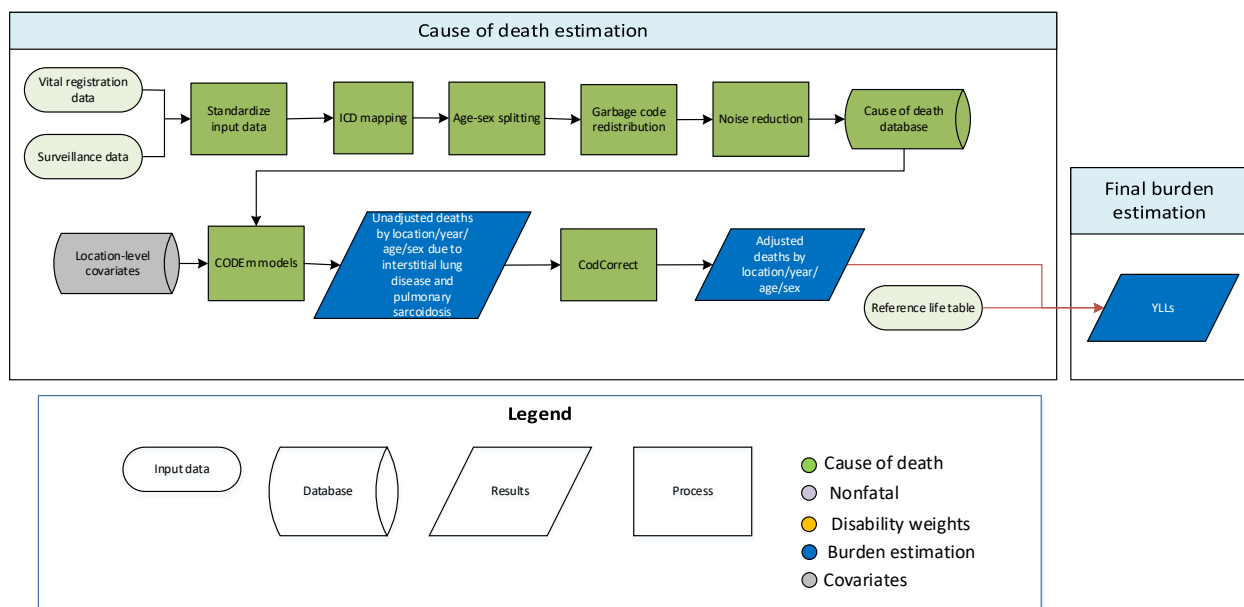

### Input data

Data used to estimate interstitial lung disease and pulmonary sarcoidosis mortality included vital registration and surveillance data from the cause of death (COD) database. Our outlier criteria excluded data points that (1) were implausibly high or low, (2) substantially conflicted with established age or temporal patterns, or (3) significantly conflicted with other data sources conducted from the same locations or locations with similar characteristics (ie, Socio-demographic Index).

### Modelling strategy

The standard CODEm modelling approach was applied to estimate deaths due to interstitial lung disease and pulmonary sarcoidosis. Separate models were conducted for male and female mortality, and the age range for both models was 1–95+ years. The mortality estimates from the interstitial lung disease and pulmonary sarcoidosis models were ultimately fit into the chronic respiratory envelope.

The same covariates from GBD 2016 were used.

| Level | Covariate                                             | Direction |
|-------|-------------------------------------------------------|-----------|
| 1     | log-transformed SEV scalar: interstitial lung disease | +         |
|       | smoking prevalence                                    | +         |
|       | cumulative cigarettes (5 years)                       | +         |
| 2     | elevation over 1,500m (proportion)                    | +         |
|       | elevation between 500 and 1,500m (proportion)         | +         |

|   |                                                                |   |
|---|----------------------------------------------------------------|---|
|   | population density over 1,000 ppl/km <sup>2</sup> (proportion) | + |
|   | indoor air pollution (all cooking fuels)                       | + |
|   | outdoor air pollution (PM <sub>2.5</sub> )                     | + |
|   | healthcare access and quality index                            | - |
| 3 | log LDI (I\$ per capita)                                       | - |
|   | education (years per capita)                                   | - |
|   | Socio-demographic Index                                        | - |

## Other Chronic Respiratory Diseases

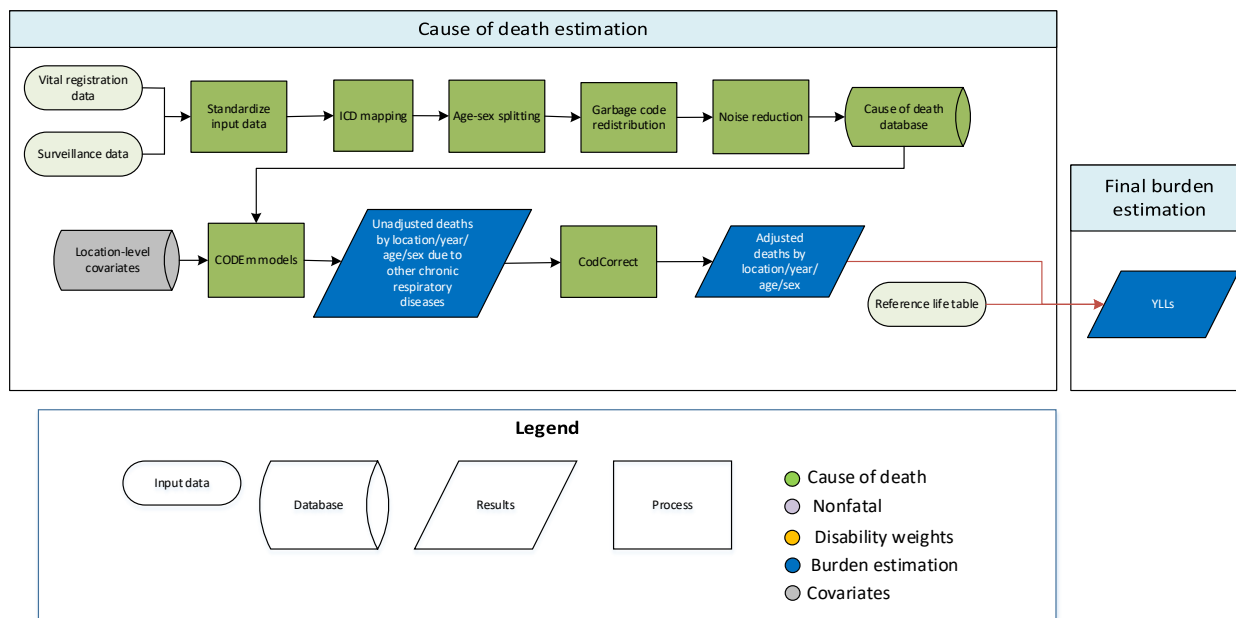

### Input data

Data used to estimate other chronic respiratory diseases included vital registration and surveillance data from the cause of death (COD) database. Our outlier criteria excluded data points that (1) were implausibly high or low, (2) substantially conflicted with established age or temporal patterns, or (3) significantly conflicted with other data sources conducted from the same locations or locations with similar characteristics (ie, Socio-demographic Index).

### Modelling strategy

The standard CODEm modelling approach was applied to estimate deaths due to other chronic respiratory diseases. Separate models were conducted for male and female mortality, and the age range for both models was 1 year to 95+ years. Like other respiratory causes, the mortality estimates from other chronic respiratory diseases were ultimately fit into the chronic respiratory envelope.

The same covariates from GBD 2016 were used.

| Level | Covariate                                                      | Direction |
|-------|----------------------------------------------------------------|-----------|
| 1     | log-transformed SEV scalar: other chronic respiratory diseases | +         |
|       | smoking prevalence                                             | +         |
|       | cumulative cigarettes (5 years)                                | +         |
|       | indoor air pollution (all cooking fuels)                       | +         |
|       | outdoor air pollution (PM <sub>2.5</sub> )                     | +         |

|   |                                                                |   |
|---|----------------------------------------------------------------|---|
| 2 | elevation over 1,500m (proportion)                             | + |
|   | elevation between 500 and 1,500m (proportion)                  | + |
|   | population density over 1,000 ppl/km <sup>2</sup> (proportion) | + |
|   | healthcare access and quality index                            | - |
| 3 | log LDI (I\$ per capita)                                       | - |
|   | education (years per capita)                                   | - |
|   | Socio-demographic Index                                        | - |

## Digestive Diseases

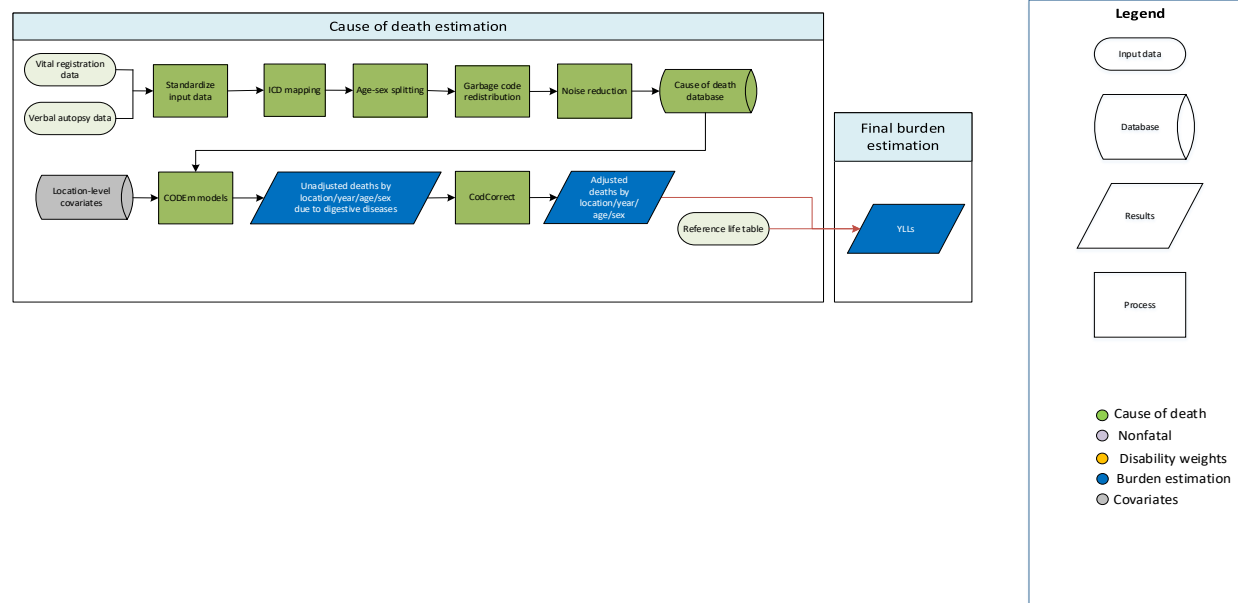

### Input data

Data used to estimate mortality of digestive diseases consisted of vital registration data and verbal autopsy data from the cause of death (COD) database. The data in digestive diseases consist of aggregated data from all other specific digestive diseases (peptic ulcer disease, gastritis and duodenitis, gallbladder and biliary diseases, pancreatitis, cirrhosis and other chronic liver diseases, inguinal, femoral and abdominal hernias, inflammatory bowel disease, vascular intestinal disorders, paralytic ileus and intestinal obstruction), as well as unique data points from deaths reported with a set of non-specific digestive disease codes. In GBD 2017, in contrast to previous rounds, cirrhosis and other chronic liver diseases were included in the model of total deaths due to digestive diseases. We marked data as outliers in instances where garbage code redistribution and noise reduction, in combination with small sample sizes, resulted in unreasonable cause fractions. We also marked as outliers those data that violated well-established time or age trends. Methods for selecting outliers were consistent across both vital registration and verbal autopsy data.

### Modelling strategy

We modelled deaths due to all digestive diseases with a standard CODEm model using the cause of death database and location-level covariates as inputs. The model followed standard parameters. We hybridised separate global and data-rich models to acquire unadjusted results, which we finalised and adjusted using CoDCorrect to reach final years of life lost (YLLs) due to digestive diseases. Compared to GBD 2016, in 2017 we removed the underweight covariate, and cigarette consumption was quantified as 5-year cumulative rather than 10-year cumulative.

| Covariate                           | Level | Direction |
|-------------------------------------|-------|-----------|
| Alcohol (litres per capita)         | 1     | 1         |
| Cumulative cigarettes (5 years)     | 1     | 1         |
| Education (years per capita)        | 3     | -1        |
| Lag distributed income (per capita) | 3     | -1        |



|                                     |   |    |
|-------------------------------------|---|----|
| Sanitation (proportion with access) | 1 | -1 |
| Socio-demographic Index             | 3 | -1 |
| Fruits (grams adjusted)             | 2 | -1 |
| Red meats (grams adjusted)          | 2 | 1  |
| Healthcare access and quality index | 2 | -1 |

---

# Cirrhosis

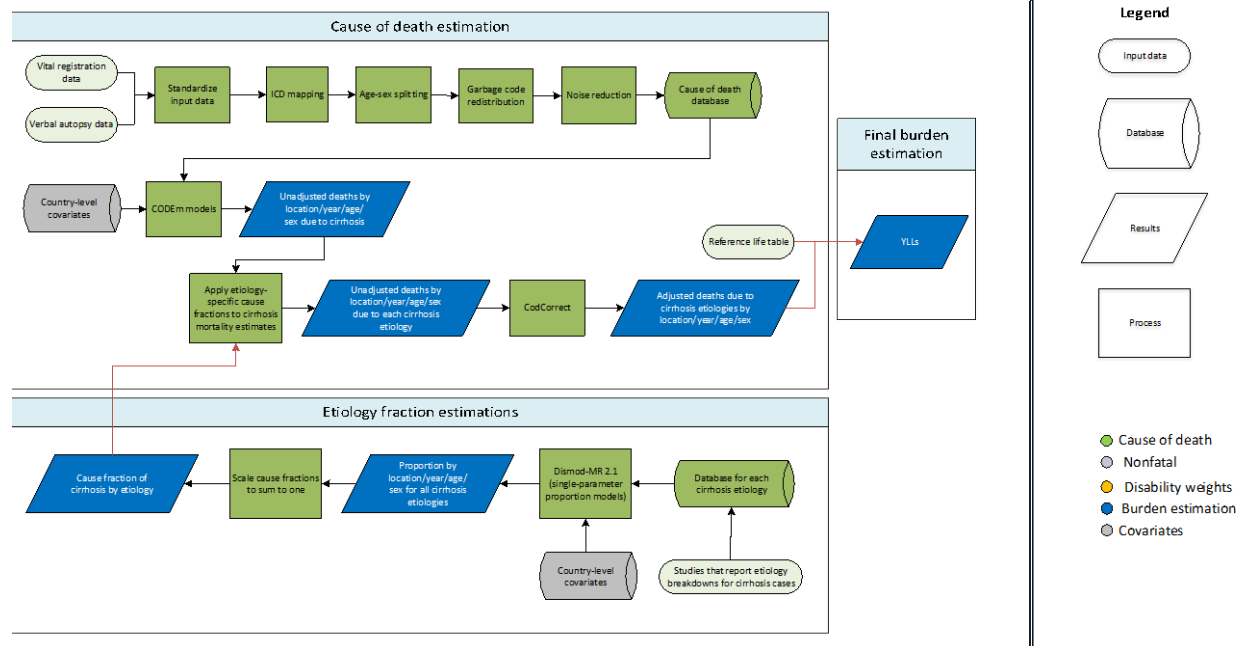

## Input data

We modelled cirrhosis mortality using all available data in the cause of death database. Data points were outliered based on country data completeness, and for implausible values informing the models.

## Modelling strategy

We modelled cirrhosis mortality using a two-model hybrid approach: 1) a global CODEm model of all locations, using all data in the CoD database; and 2) a CODEm model restricted to data-rich countries, both from ages 1 to 95+. We modelled cirrhosis deaths encompassing all aetiologies in a parent CODEm model. We then applied proportion splits to separate cirrhosis deaths for each cirrhosis aetiology.

To estimate mortality from cirrhosis due to alcohol, cirrhosis due to hepatitis B, cirrhosis due to hepatitis C, cirrhosis due to other causes, and cirrhosis due to NASH, we developed aetiological proportion models using DisMod MR to split the parent cirrhosis mortality estimates. In GBD 2017 we incorporated cirrhosis due to non-alcoholic steatohepatitis (NASH) as a fifth etiology for cirrhosis. Cases of cirrhosis due to NASH were previously nestled within the “other cirrhosis” aetiology and are occasionally listed as cryptogenic cirrhosis in literature.

Given the similar aetiologies for liver cancer and cirrhosis, we integrated the aetiology models for these two causes. We used liver cancer aetiology proportion models as covariates for our cirrhosis aetiology proportion models. The aetiology proportion models included as covariates such as alcohol consumption (litres per capita), hepatitis B surface antigen (HBsAg) seroprevalence, hepatitis C (anti-HCV IgG) seroprevalence, and obesity. Proportions from the five aetiology models were then rescaled to sum to one at the draw level and used to split the parent cirrhosis mortality estimates. Covariates inputs for

published models for the CODEm cirrhosis parent model and coefficient tables for GBD 2017 for the five DisMod proportion models are listed below.

#### Parent cirrhosis CODEm model covariate table

| Covariate name                            | Level | Direction |
|-------------------------------------------|-------|-----------|
| Alcohol (litres per capita)               | 1     | 1         |
| Schistosomiasis prevalence                | 1     | 1         |
| Hepatitis B prevalence                    | 1     | 1         |
| Hepatitis C prevalence                    | 1     | 1         |
| Hepatitis B3 vaccine (proportion covered) | 1     | -1        |
| Diabetes prevalence                       | 2     | 1         |
| BMI (mean)                                | 2     | 1         |
| Healthcare access and quality index       | 2     | -1        |
| Education (years per capita)              | 3     | -1        |
| Health system access                      | 3     | -1        |
| LDI (per capita)                          | 3     | -1        |
| Socio-demographic Index                   | 3     | -1        |

#### Etiology proportion DisMod model covariate tables

##### Proportion of cirrhosis due to Hep B covariate table

| Measure    | Covariate                                                        | Type    | beta                     | exp beta            |
|------------|------------------------------------------------------------------|---------|--------------------------|---------------------|
| Proportion | Hepatitis B (HBsAg) seroprevalence                               | Country | 0.50 (0.029 to 0.97)     | 1.65 (1.03 to 2.63) |
| Proportion | Proportion of liver cancer due to hepatitis B (age-standardised) | Country | 0.62 (0.067 to 0.99)     | 1.86 (1.07 to 2.68) |
| Proportion | Hepatitis B 3-dose coverage (proportion), lagged 10 years        | Country | -0.21 (-0.74 to -0.0077) | 0.81 (0.48 to 0.99) |

##### Proportion of cirrhosis due to Hep C covariate table

| Measure    | Covariate                                                        | Type    | beta                | exp beta           |
|------------|------------------------------------------------------------------|---------|---------------------|--------------------|
| Proportion | Hepatitis C (IgG) seroprevalence                                 | Country | 0.49 (0.022 – 0.97) | 1.63 (1.02 – 2.65) |
| Proportion | Proportion of liver cancer due to hepatitis C (age-standardised) | Country | 0.54 (0.041 – 0.98) | 1.72 (1.04 – 2.66) |

### Proportion of cirrhosis due to alcohol covariate table

| Measure    | Covariate                                                    | Type    | beta                    | exp beta           |
|------------|--------------------------------------------------------------|---------|-------------------------|--------------------|
| Proportion | Alcohol (litres per capita)                                  | Country | 0.028 (0.0013 – 0.075)  | 1.03 (1.00 – 1.08) |
| Proportion | Proportion of liver cancer due to alcohol (age-standardised) | Country | 0.53 (0.032 – 0.98)     | 1.70 (1.03 – 2.66) |
| Proportion | Alcohol abstainer proportion, age-standardised               | Country | -0.55 (-0.99 to -0.035) | 0.58 (0.37 – 0.97) |

### Proportion of cirrhosis due to NASH covariate table

| Measure    | Covariate                                                 | Type    | beta                   | exp beta           |
|------------|-----------------------------------------------------------|---------|------------------------|--------------------|
| Proportion | Mean BMI                                                  | Country | 0.054 (0.00085 – 0.18) | 1.06 (1.00 – 1.20) |
| Proportion | Prevalence of obesity                                     | Country | 0.81 (0.029 – 1.92)    | 2.24 (1.03 – 6.79) |
| Proportion | Proportion of liver cancer due to NASH (age-standardised) | Country | 0.98 (0.040 – 1.95)    | 2.67 (1.04 – 7.02) |
| Proportion | NAFLD/NASH prevalence                                     | Country | 0.85 (0.026 – 1.93)    | 2.34 (1.03 – 6.87) |

### Proportion of cirrhosis due to other causes covariate table

| Measure    | Covariate                                                         | Type    | beta                | exp beta           |
|------------|-------------------------------------------------------------------|---------|---------------------|--------------------|
| Proportion | Proportion of liver cancer due to other causes (age-standardised) | Country | 0.54 (0.037 – 0.98) | 1.72 (1.04 – 2.66) |

## Upper Digestive Diseases

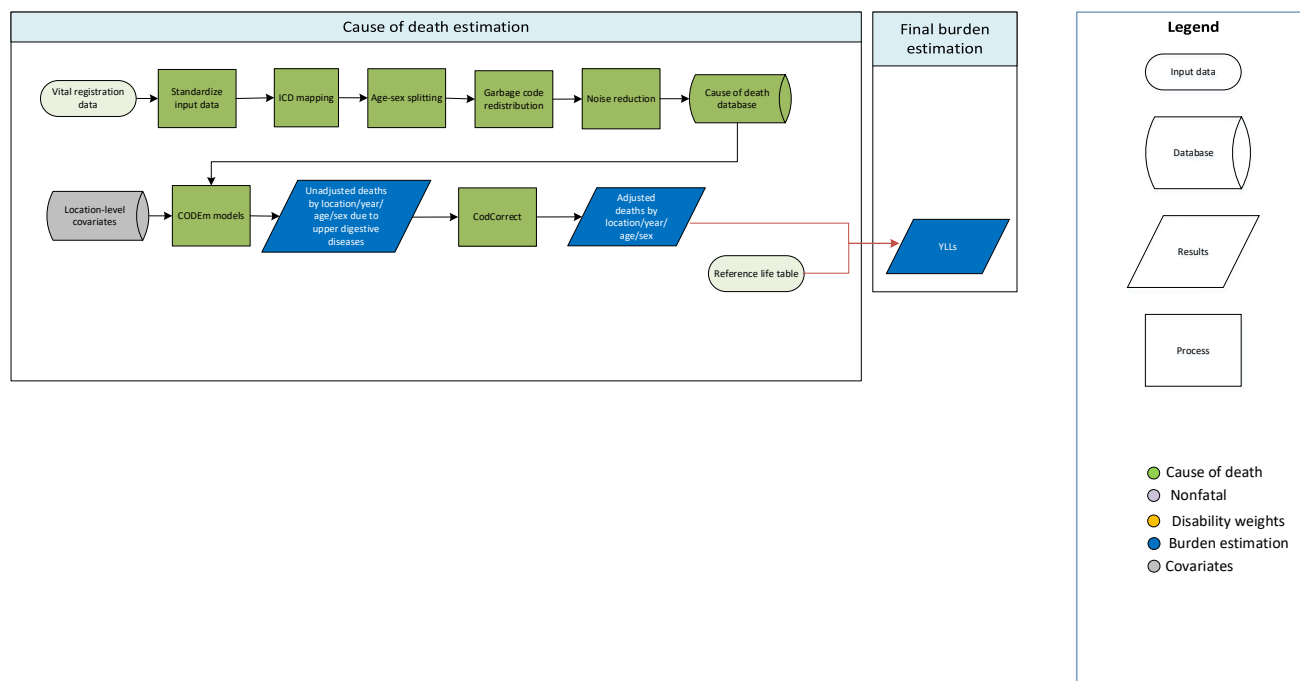

### Input data

Data used to estimate mortality due to upper digestive diseases consisted of vital registration data from the cause of death (COD) database. Upper digestive disease data aggregate deaths due to peptic ulcer disease and gastritis and duodenitis, which are also modelled separately. For sources of data that were considered too low-quality to definitively assign peptic ulcer or gastritis deaths to one of these two causes, data were included only in the upper digestive disease dataset. We marked data as outliers in instances where garbage code redistribution and noise reduction, in combination with small sample sizes, resulted in unreasonable cause fractions; and data that violated well-established time or age trends.

### Modelling strategy

We modelled deaths due to upper digestive diseases with a standard CODEm model using the cause of death database and location-level covariates as inputs. The model followed standard parameters, with the exception that the start age of the model was 1 year. We hybridised separate global and data-rich models to acquire unadjusted results, which we finalised and adjusted using CoDCorrect to reach final YLLs due to upper digestive diseases. This was the first year upper digestive diseases, in aggregate, were modelled as a cause of death. The following covariates were entered into CODEm for the selection process.

| Covariate                           | Level | Direction |
|-------------------------------------|-------|-----------|
| Alcohol (litres per capita)         | 1     | 1         |
| Cumulative cigarettes (5 years)     | 1     | 1         |
| Cumulative cigarettes (10 years)    | 1     | 1         |
| Log LDI (I\$ per capita)            | 3     | -1        |
| Sanitation (proportion with access) | 2     | -1        |

|                                          |   |    |
|------------------------------------------|---|----|
| Smoking prevalence                       | 1 | 1  |
| Maternal education (years per capita)    | 3 | -1 |
| Unsafe water (summary exposure variable) | 2 | 1  |
| Socio-demographic Index                  | 3 | -1 |
| Vegetables adjusted (g)                  | 2 | 0  |
| Healthcare access and quality index      | 2 | -1 |

---

## Peptic Ulcer Disease

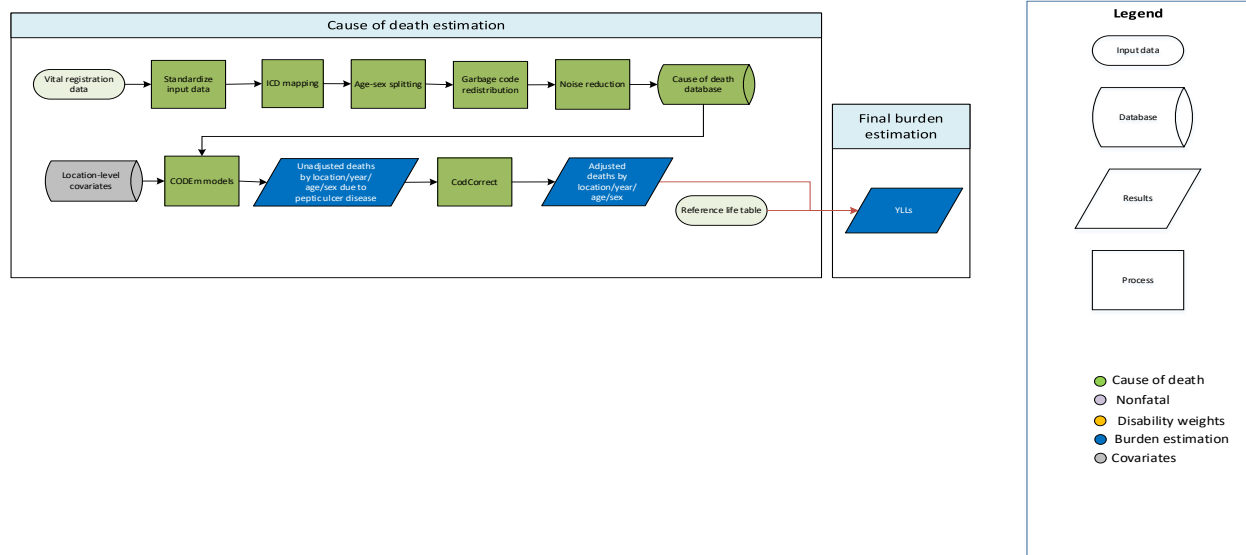

### Input data

Data used to estimate mortality of peptic ulcer disease consisted of vital registration data from the cause of death (COD) database. We marked data as outliers in instances where garbage code redistribution and noise reduction, in combination with small sample sizes, resulted in unreasonable cause fractions, and data that violated well-established time or age trends.

### Modelling strategy

We modelled deaths due to peptic ulcer disease with a standard CODEm model using the cause of death database and location-level covariates as inputs. The model followed standard parameters, with the exception that the start age of the model was 1 year instead of 0 and the linear floor rate was lowered to 0.0001 in order to better capture low data. We hybridised separate global and data-rich models to acquire unadjusted results, which we finalised and adjusted using CoDCorrect to reach final years of life lost (YLLs) due to peptic ulcer disease. The covariates tried and their expected strengths and directions are unchanged in GBD 2017 compared to GBD 2016.

| Covariate                                      | Level | Direction |
|------------------------------------------------|-------|-----------|
| Alcohol (litres per capita)                    | 1     | 1         |
| Cumulative cigarettes (10 years)               | 1     | 1         |
| Cumulative cigarettes (5 years)                | 1     | 1         |
| Lag distributed income (per capita)            | 3     | -1        |
| Sanitation (proportion with access)            | 2     | -1        |
| Smoking (prevalence)                           | 1     | 1         |
| Maternal education (years per capita)          | 3     | -1        |
| Improved water source (proportion with access) | 2     | 1         |
| Socio-demographic Index                        | 3     | -1        |
| Vegetables (grams adjusted)                    | 2     | 0         |
| Healthcare access and quality index            | 2     | -1        |

## Gastritis and Duodenitis

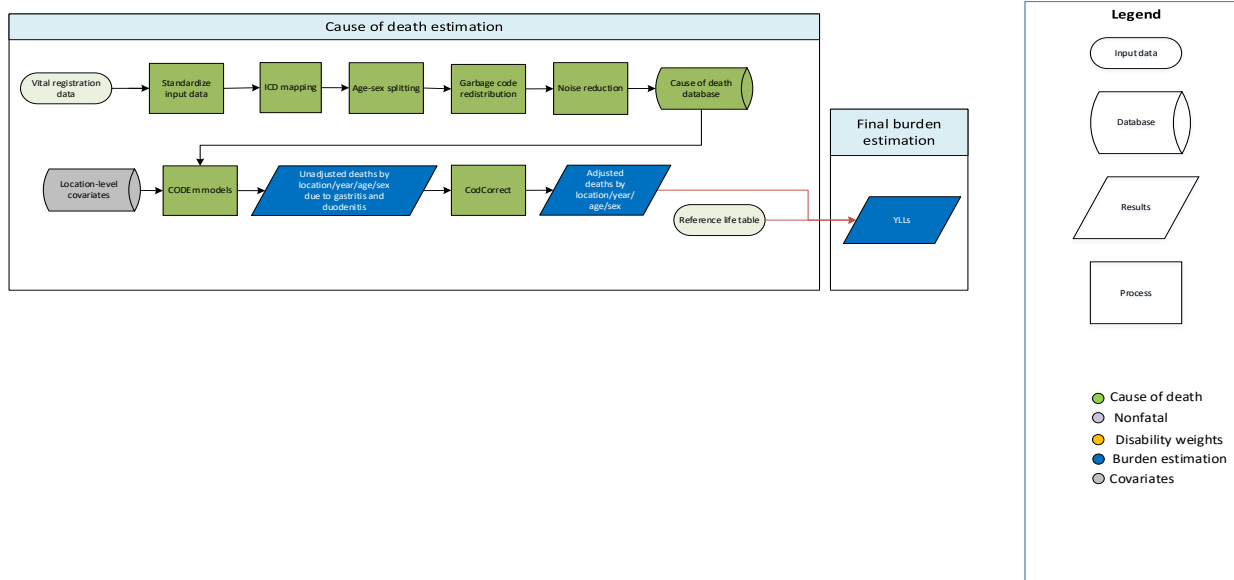

### Input data

Vital registration data were used to model this cause. We marked data as outliers in instances where garbage code redistribution and noise reduction, in combination with small sample sizes, resulted in unreasonable cause fractions, and data that violated well-established time or age trends.

### Modelling strategy

We modelled deaths due to gastritis and duodenitis with a standard CODEm model using the cause of death database and location-level covariates as inputs. The model followed standard parameters, with the exception that the start age of the model was 1 year instead of 0 and the linear floor rate was lowered to 0.001 in order to better capture low data. We hybridised separate global and data-rich models to acquire unadjusted results, which we finalised and adjusted using CoDCorrect to reach final years of life lost (YLLs) due to gastritis and duodenitis. Covariates tried and their expected strengths and directions in GBD 2017 were not changed compared to GBD 2016.

| Covariate                                | Level | Direction |
|------------------------------------------|-------|-----------|
| Alcohol (litres per capita)              | 1     | 1         |
| Cumulative cigarettes (10 years)         | 1     | 1         |
| Cumulative cigarettes (5 years)          | 1     | 1         |
| Education (years per capita)             | 3     | -1        |
| Lag distributed income (per capita)      | 3     | -1        |
| Sanitation (proportion with access)      | 2     | -1        |
| Smoking prevalence                       | 1     | 1         |
| Unsafe water (summary exposure variable) | 2     | 1         |
| Socio-demographic Index                  | 3     | -1        |
| Vegetables (grams adjusted)              | 2     | 0         |
| Healthcare access and quality index      | 2     | -1        |



## Appendicitis

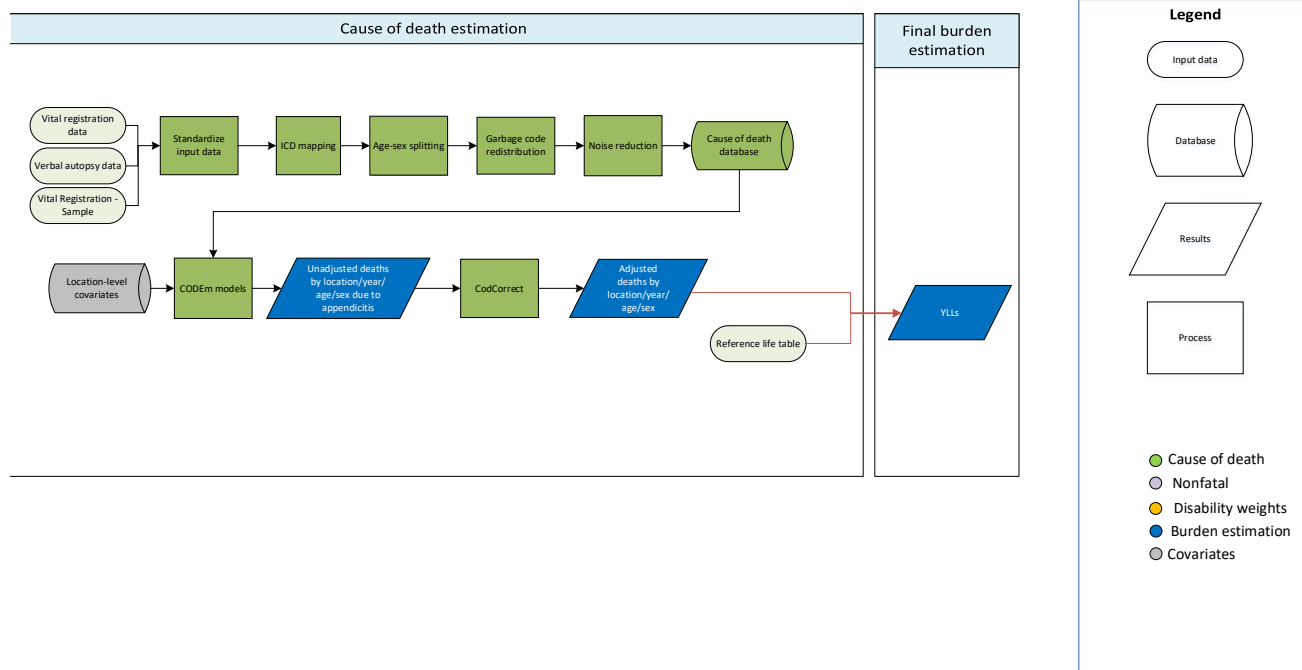

### Input data

Data used to estimate appendicitis mortality consisted of vital registration and verbal autopsy data from the cause of death (COD) database. We outliered data in instances where garbage code redistribution and noise reduction, in combination with small sample sizes, resulted in unreasonable cause fractions; and data that violated well-established time or age trends.

### Modelling strategy

We modelled deaths due to appendicitis with a standard CODEm model using the cause of death database and location-level covariates as inputs. The model followed standard parameters, with the exception that the start age of the model was 1 year old instead of 0 and the linear floor rate was lowered to 0.0001 in order to better capture low data. We hybridized separate global and data-rich models to acquire unadjusted results, which we finalised and adjusted using CodCorrect to reach final YLLs due to appendicitis.

There were no significant changes in the modelling process between GBD 2016 and GBD 2017.

| Level | Covariate                           | Direction |
|-------|-------------------------------------|-----------|
| 2     | Healthcare access and quality index | -         |
|       | Fruits adjusted (g)                 | -         |
|       | Vegetables adjusted (g)             | -         |
| 3     | Education (years per capita)        | -         |
|       | Log LDI (I\$ per capita)            | -         |
|       | Socio-demographic Index             | -         |
|       | Health system access (capped)       | -         |

## Paralytic Ileus and Intestinal Obstruction

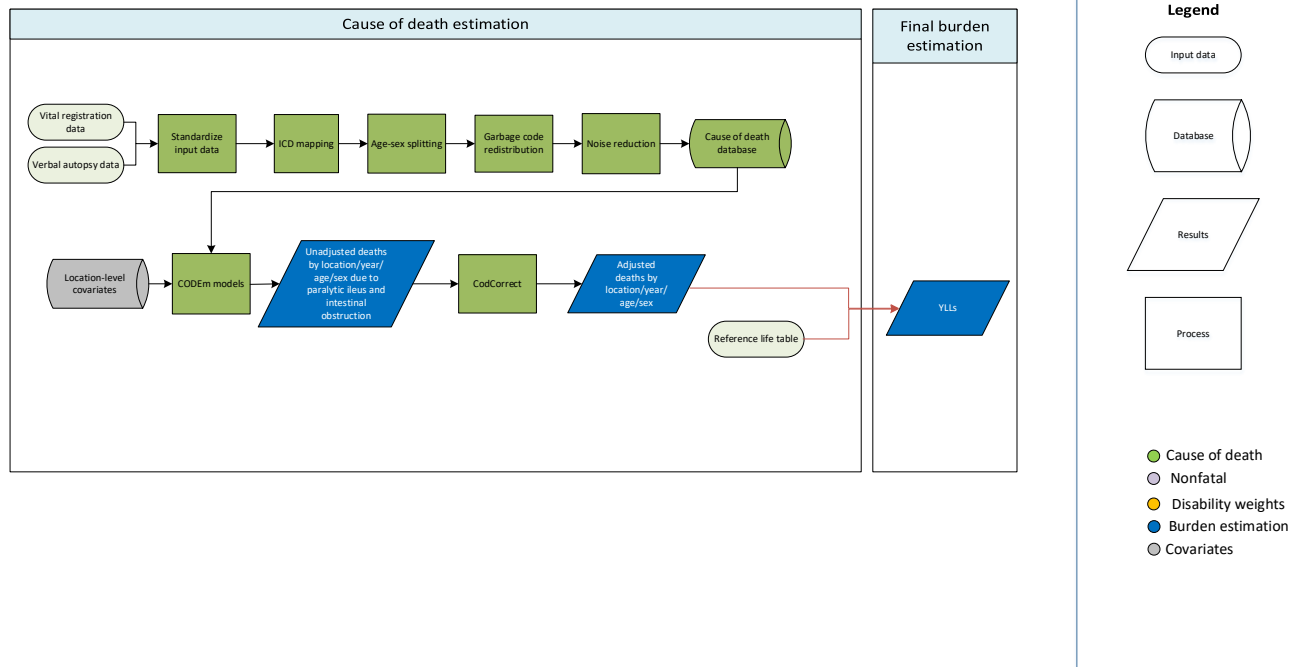

### Input data

Data used to estimate paralytic ileus and intestinal obstruction mortality consisted of vital registration and verbal autopsy data from the cause of death (COD) database. We outliered all VA data in children under the age of 1 because it is not possible to accurately diagnose paralytic ileus or intestinal obstruction in this age group; and data that violated well-established time or age trends; and data in instances where garbage code redistribution and noise reduction, in combination with small sample sizes, resulted in unreasonable cause fractions.

### Modelling strategy

We modelled deaths due to paralytic ileus and intestinal obstruction with a standard CODEm model using the cause of death database and location-level covariates as inputs. The model followed standard parameters, with the exception that the linear floor rate was lowered to 0.0001 in order to better capture low data. We hybridised separate global and data-rich models to acquire unadjusted results, which we finalised and adjusted using CodCorrect to reach final YLLs due to paralytic ileus and intestinal obstruction.

There were no significant changes in the modelling process between GBD 2016 and GBD 2017.

| Level | Covariate                           | Direction |
|-------|-------------------------------------|-----------|
| 2     | Healthcare access and quality index | -         |
|       | Fruits adjusted (g)                 | -         |
|       | Vegetables adjusted (g)             | -         |
| 3     | Education (years per capita)        | -         |
|       | Log LDI (I\$ per capita)            | -         |
|       | Socio-demographic Index             | -         |
|       | Health system access (capped)       | -         |

## Inguinal, Femoral, and Abdominal Hernias

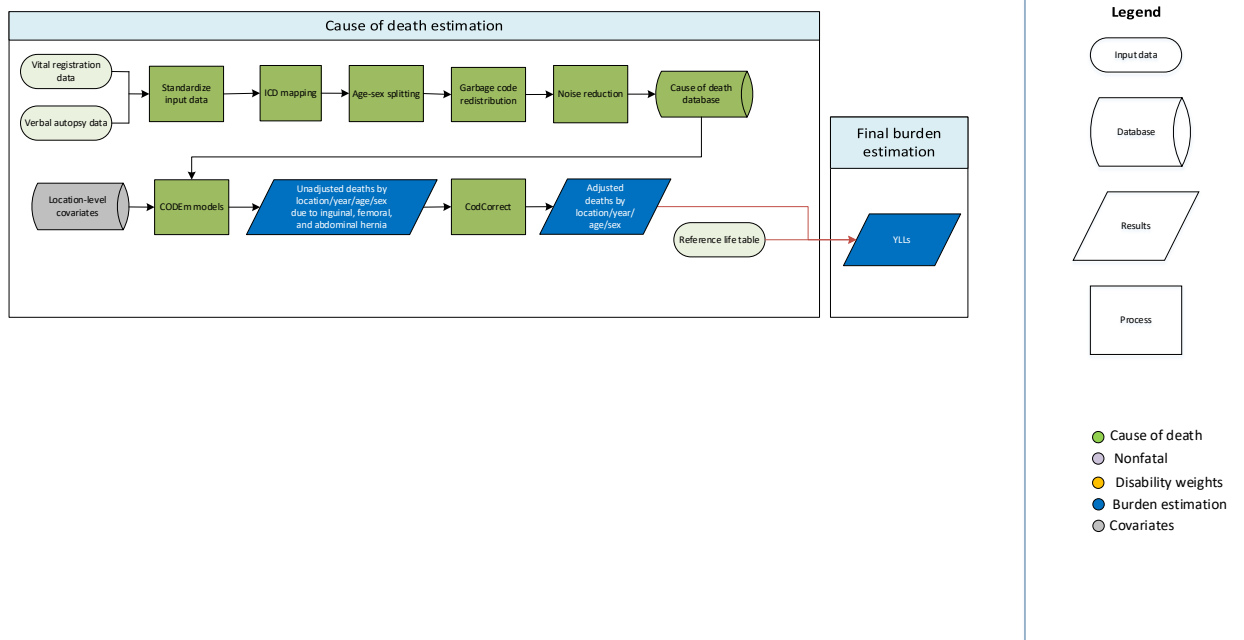

### Input data

Vital registration and verbal autopsy data were used to model this cause. We marked data as outliers in instances where garbage code redistribution and noise reduction, in combination with small sample sizes, resulted in unreasonable cause fractions. We also marked as outliers those data that violated well-established time or age trends. Methods for assigning outlier status were consistent across both vital registration and verbal autopsy data.

### Modelling strategy

We modelled deaths due to inguinal, femoral, and abdominal hernias with a standard CODEm model using the cause of death database and location-level covariates as inputs. The model followed standard parameters, with the exception that the start age of the model was 1 year instead of 0 and the linear floor rate was lowered to 0.0001 in order to better capture low data. We hybridised separate global and data-rich models to acquire unadjusted results, which we finalised and adjusted using CoDCorrect to reach final years of life lost (YLLs) due to inguinal, femoral, and abdominal hernias. In contrast to GBD 2016, covariates for smoking and BMI were included for possible selection during CODEm modelling in GBD 2017.

| Covariate                           | Level | Direction |
|-------------------------------------|-------|-----------|
| Education (years per capita)        | 3     | -1        |
| Lag distributed income (per capita) | 3     | -1        |
| Socio-demographic Index             | 3     | 0         |
| Healthcare access and quality index | 2     | -1        |
| Cumulative cigarettes (10 years)    | 1     | 1         |
| Cumulative cigarettes (5 years)     | 1     | 1         |

|                        |   |    |
|------------------------|---|----|
| Smoking prevalence     | 1 | 1  |
| Body mass index (mean) | 1 | -1 |

---

## Inflammatory Bowel Disease

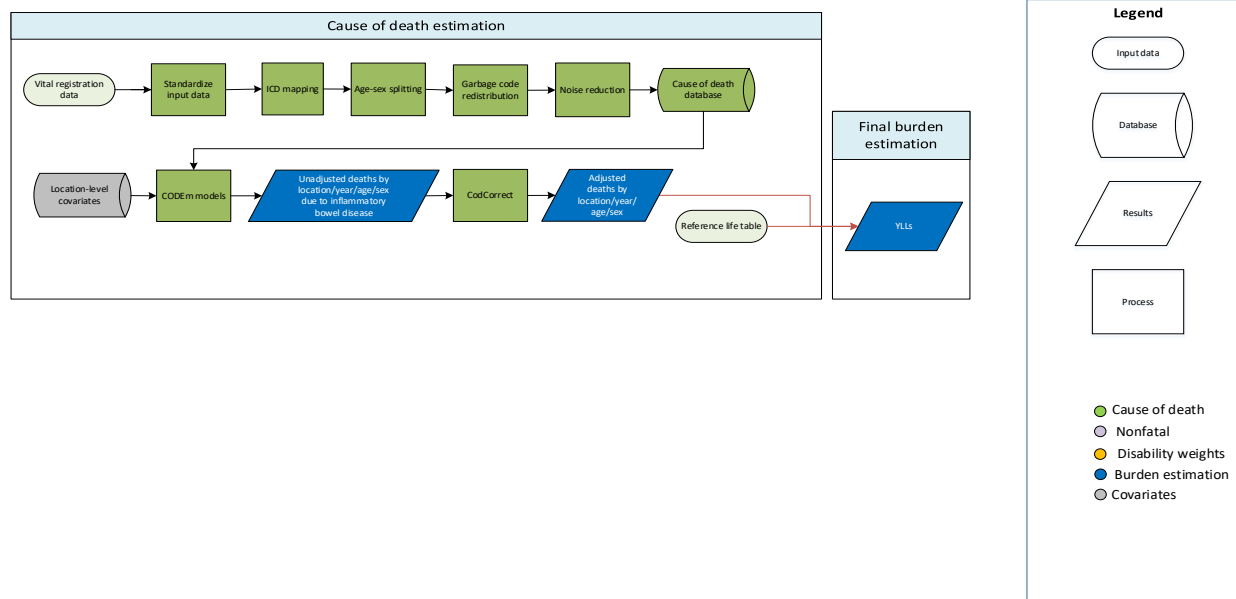

### Input data

Vital registration data were used to model this cause. We marked data as outliers in instances where garbage code redistribution and noise reduction, in combination with small sample sizes, resulted in unreasonable cause fractions; and data that violated well-established time or age trends.

### Modelling strategy

We modelled deaths due to inflammatory bowel disease with a standard CODEm model using the cause of death database and location-level covariates as inputs. The model followed standard parameters, with the exception that the start age of the model was 1 year instead of 0 and the linear floor rate was lowered to 0.0001 in order to better capture low data. We hybridised separate global and data-rich models to acquire unadjusted results, which we finalised and adjusted using CoDCorrect to reach final years of life lost (YLLs) due to inflammatory bowel disease. In GBD 2017 there were no changes in covariates tried or their expected strengths or directions, as compared to GBD 2016.

| Covariate                           | Level | Direction |
|-------------------------------------|-------|-----------|
| Education (years per capita)        | 3     | -1        |
| Lag distributed income (per capita) | 3     | 0         |
| Latitude 15 to 30 (proportion)      | 2     | -1        |
| Latitude 30 to 45 (proportion)      | 2     | 1         |
| Latitude 45 plus (proportion)       | 2     | 1         |
| Socio-demographic Index             | 3     | 0         |
| Fruits (grams adjusted)             | 1     | -1        |
| Red meats (grams adjusted)          | 1     | 1         |
| Saturated fats (adjusted percent)   | 1     | 1         |
| Vegetables (grams adjusted)         | 1     | -1        |
| Healthcare access and quality index | 2     | -1        |

## Vascular Intestinal Disorders

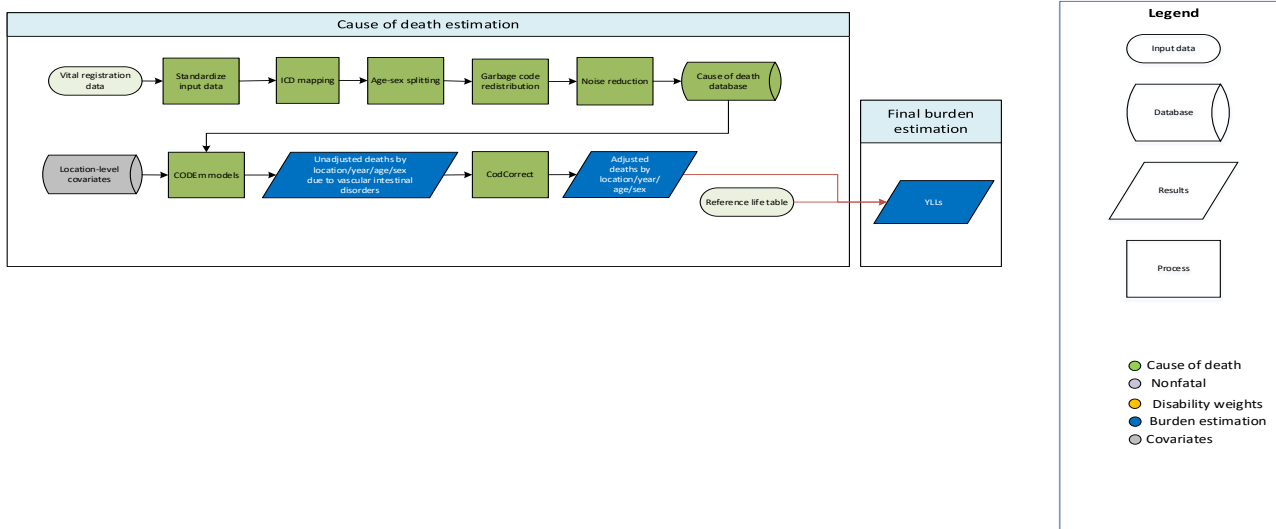

### Input data

Vital registration data were used to model this cause. We marked data as outliers in instances where garbage code redistribution and noise reduction, in combination with small sample sizes, resulted in unreasonable cause fractions; and data that violated well-established time or age trends.

### Modelling strategy

We modelled deaths due to vascular intestinal disorders with a standard CODEm model using the cause of death database and location-level covariates as inputs. The model followed standard parameters, with the exception that the start age of the model was 1 year instead of 0 and the linear floor rate was lowered to 0.0001 in order to better capture low data. We hybridised separate global and data-rich models to acquire unadjusted results, which we finalised and adjusted using CoDCorrect to reach final years of life lost (YLLs) due to vascular intestinal disorders. In GBD 2017, compared to GBD 2016, there were no changes in covariates or their expected strength and direction.

| Covariate                                     | Level | Direction |
|-----------------------------------------------|-------|-----------|
| Alcohol (litres per capita)                   | 2     | 1         |
| Diabetes fasting plasma glucose (mmol/L)      | 1     | 1         |
| Diabetes age-specific prevalence (proportion) | 1     | 1         |
| Education (years per capita)                  | 3     | -1        |
| Lag distributed income (per capita)           | 3     | -1        |
| Cholesterol (mean)                            | 1     | 1         |
| Systolic blood pressure (mean)                | 1     | 1         |
| Latitude over 45 (proportion)                 | 3     | 1         |
| Socio-demographic Index                       | 3     | 0         |
| Fruits (grams adjusted)                       | 2     | -1        |
| Saturated fats (adjusted percent)             | 1     | 1         |
| Vegetables (grams adjusted)                   | 2     | -1        |
| Healthcare access and quality index           | 2     | -1        |

## Gallbladder and Biliary Diseases

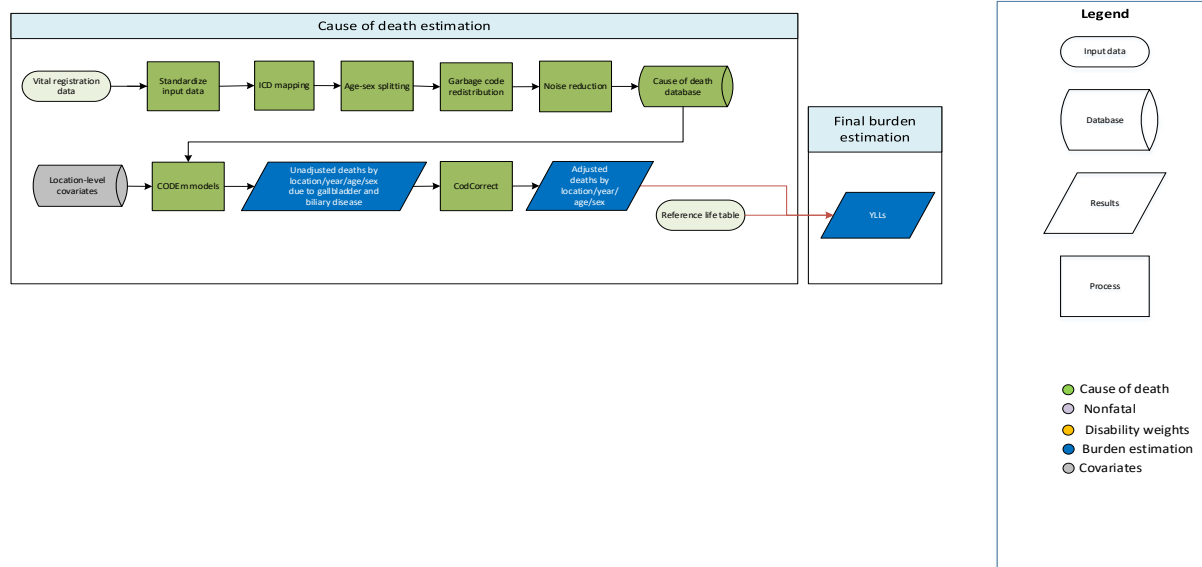

### Input data

Data used to estimate mortality of gallbladder and biliary diseases consisted of vital registration data from the cause of death (COD) database. We outliered data in instances where garbage code redistribution and noise reduction, in combination with small sample sizes, resulted in unreasonable cause fractions; and data that violated well-established time or age trends.

### Modelling strategy

We modelled deaths due to gallbladder and biliary diseases with a standard CODEm model using the cause of death database and location-level covariates as inputs. The model followed standard parameters, with the exception that the start age of the model was 1 year old instead of 0 and the linear floor rate was lowered to 0.0001 in order to better capture low data. We hybridised separate global and data-rich models to acquire unadjusted results, which we finalised and adjusted using CodCorrect to reach final years of life lost (YLLs) due to gallbladder and biliary diseases. In GBD 2016 we added the Healthcare Access and Quality (HAQ) index covariate and replaced the animal fats (kcal per capita) covariate with an updated saturated fats covariate (adjusted percent). There were no significant changes in the modelling process between GBD 2016 and GBD 2017.

| Level | Covariate                           | Direction |
|-------|-------------------------------------|-----------|
| 1     | Body-mass index (mean)              | +         |
|       | Saturated fats (adjusted percent)   | +         |
| 2     | Alcohol (litres per capita)         | +         |
|       | Healthcare access and quality index | -         |
|       | Red meats (grams adjusted)          | +         |
| 3     | Population over 65 (proportion)     | +         |
|       | Socio-demographic Index             | 0         |
|       | Lag distributed income (per capita) | 0         |
|       | Education (years per capita)        | 0         |

## Pancreatitis

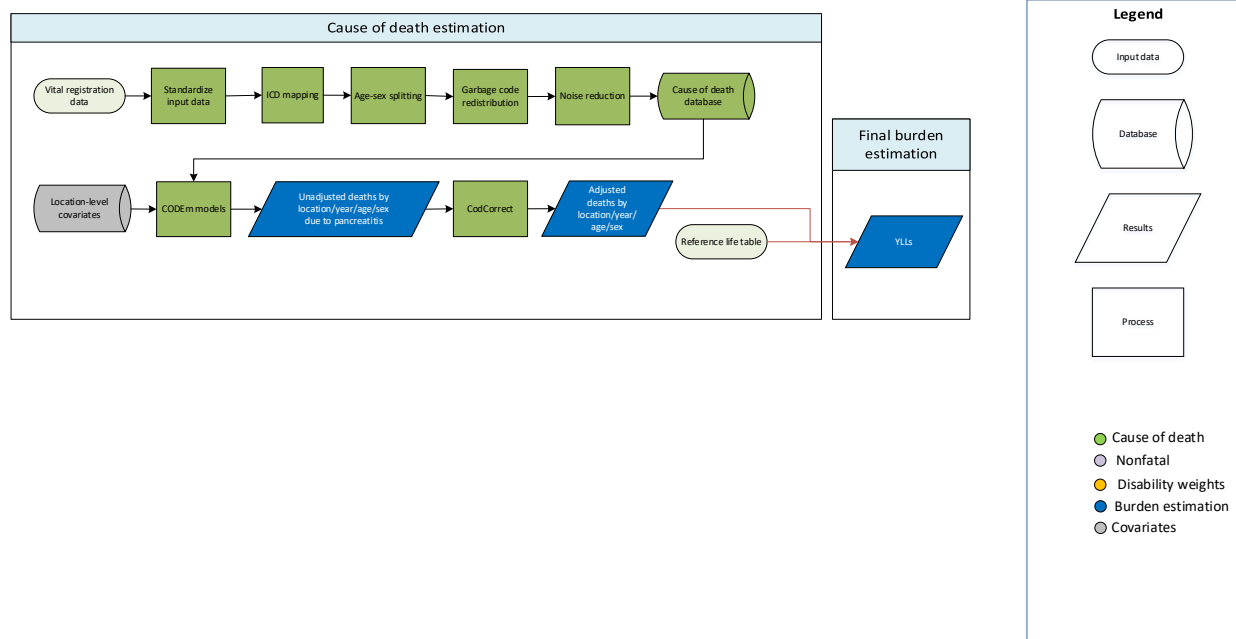

### Input data

Vital registration data were used to model this cause. We marked data as outliers in instances where garbage code redistribution and noise reduction, in combination with small sample sizes, resulted in unreasonable cause fractions, and data that violated well-established time or age trends.

### Modelling strategy

We modelled deaths due to pancreatitis with a standard CODEm model using the cause of death database and location-level covariates as inputs. The model followed standard parameters, with the exception that the start age of the model was 1 year instead of 0 and the linear floor rate was lowered to 0.0001 in order to better capture low data. We hybridised separate global and data-rich models to acquire unadjusted results, which we finalised and adjusted using CoDCorrect to reach final YLLs due to pancreatitis. In GBD 2017, we did not change covariates tried, or their expected strengths and directions, as compared to GBD 2016.

| Covariate                                       | Level | Direction |
|-------------------------------------------------|-------|-----------|
| Alcohol (litres per capita)                     | 1     | 1         |
| Education (years per capita)                    | 3     | -1        |
| Lag distributed income (per capita)             | 3     | 0         |
| Body mass index (mean)                          | 2     | 1         |
| Pancreatitis scalar (summary exposure variable) | 1     | 1         |
| Socio-demographic Index                         | 3     | 0         |
| Healthcare access and quality index             | 2     | -1        |



## Other Digestive Diseases

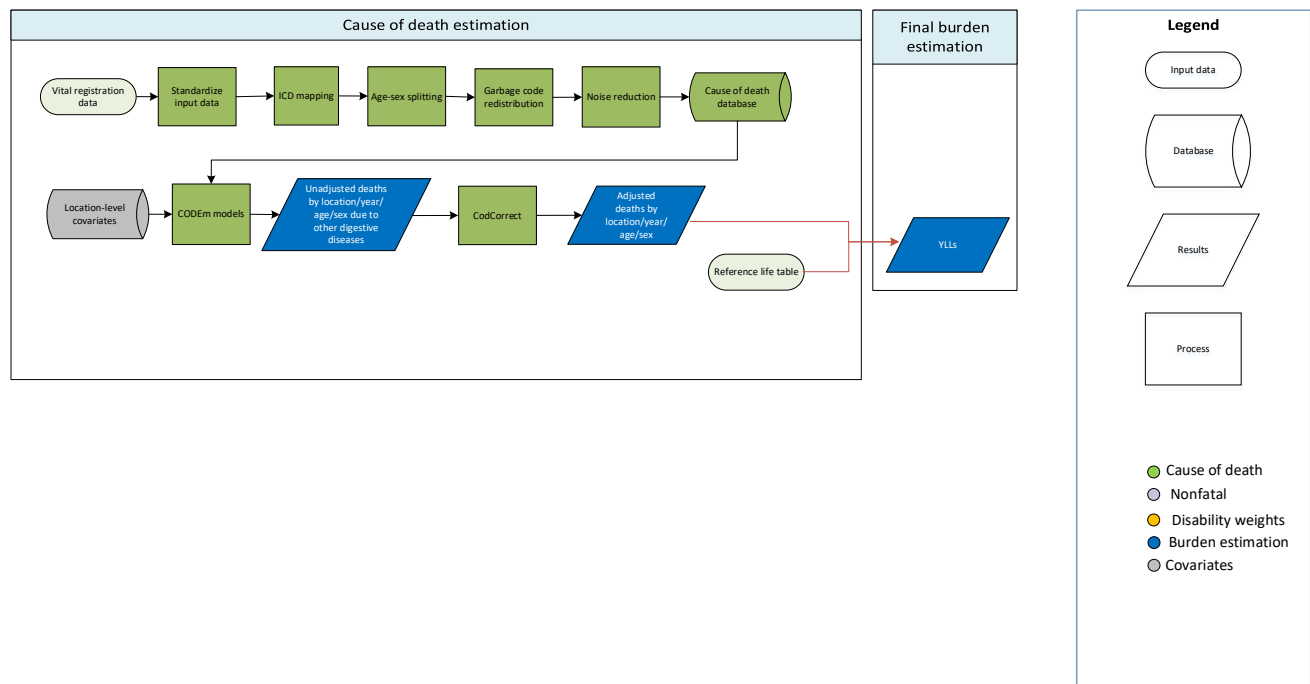

### Input data

Data used to estimate mortality due to other digestive diseases consisted of vital registration data from the cause of death (COD) database. We outliered data in instances where garbage code redistribution and noise reduction, in combination with small sample sizes, resulted in unreasonable cause fractions; and data that violated well-established time or age trends.

### Modelling strategy

We modelled deaths due to other digestive diseases with a standard CODEm model using the cause of death database and location-level covariates as inputs. The model followed standard parameters, with the exception that the start age of the model was 1 year old instead of 0. We hybridised separate global and data-rich models to acquire unadjusted results, which we finalised and adjusted using CodCorrect to reach final YLLs due to other digestive diseases.

There were no significant changes in the modelling process between GBD 2016 and GBD 2017.

| <b>Level</b>            | <b>Covariate</b>                                  | <b>Direction</b> |
|-------------------------|---------------------------------------------------|------------------|
| 1                       | Alcohol (litres per capita)                       | +                |
|                         | Cumulative cigarettes (5 years)                   | +                |
|                         | Cumulative cigarettes (10 years)                  | +                |
|                         | Smoking prevalence                                | +                |
| 2                       | Diabetes age-standardised prevalence (proportion) | +                |
|                         | Mean BMI                                          | +                |
|                         | Sanitation (proportion with access)               | -                |
|                         | Improved water source (proportion with access)    | -                |
|                         | Fruits adjusted (g)                               | -                |
|                         | Red meats adjusted (g)                            | +                |
|                         | Saturated fats adjusted (percentage)              | +                |
|                         | Healthcare access and quality index               | -                |
| Vegetables adjusted (g) | 0                                                 |                  |
| 3                       | Education (years per capita)                      | -                |
|                         | Log LDI (I\$ per capita)                          | -                |
|                         | Socio-demographic Index                           | 0                |
|                         | Health system access 2                            | -                |

# Alzheimer's Disease and Other Dementias

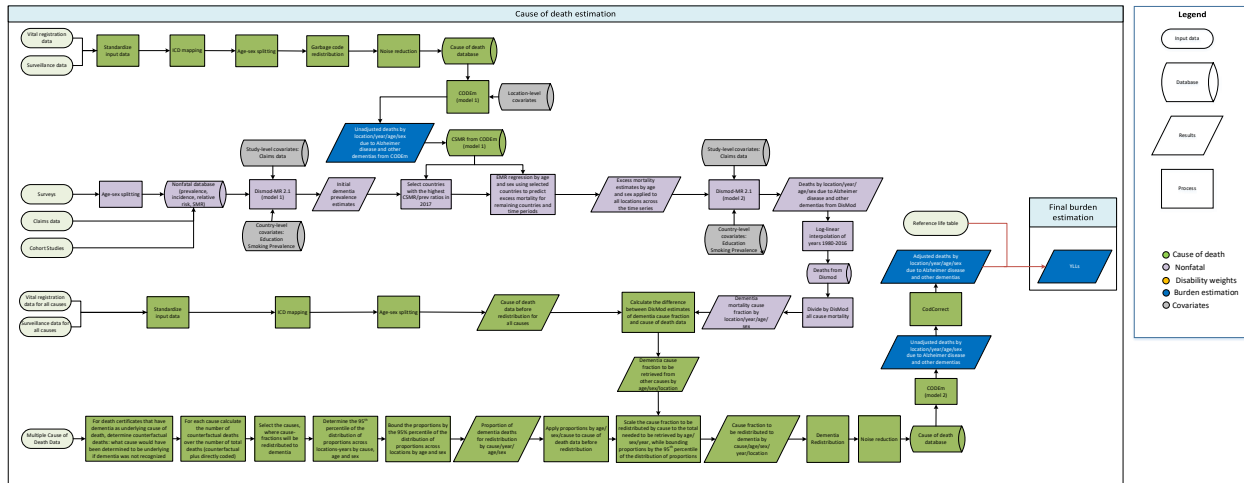

## Input Data

In GBD 2017, data used to estimate deaths due to Alzheimer's disease and other dementias (dementias hereafter) included mortality data from vital registration systems and prevalence data from surveys and medical claims sources.

An updated systematic review was conducted from September 2016 to August 2017, and search terms<sup>1</sup> were set to capture studies for all dementia, including its sub-types. The search yielded 970 initial hits and 27 were marked for extraction. Inclusion criteria comprised studies that reported prevalence, incidence, remission rate, excess mortality rate, relative risk of mortality, standardised mortality ratio, or with-condition mortality rate. Studies with non-representative samples or no clearly defined sample were excluded. A flow chart documenting this review is displayed below. We also added US claims data for 2011 and 2012–2015.

<sup>1</sup> ((dementia[Title/Abstract]) AND (incidence[Title/Abstract] OR prevalence[Title/Abstract] OR epidemiology[Title/Abstract])) AND ("2016/09/01"[Date - Publication] : "2017/08/29"[Date - Publication])

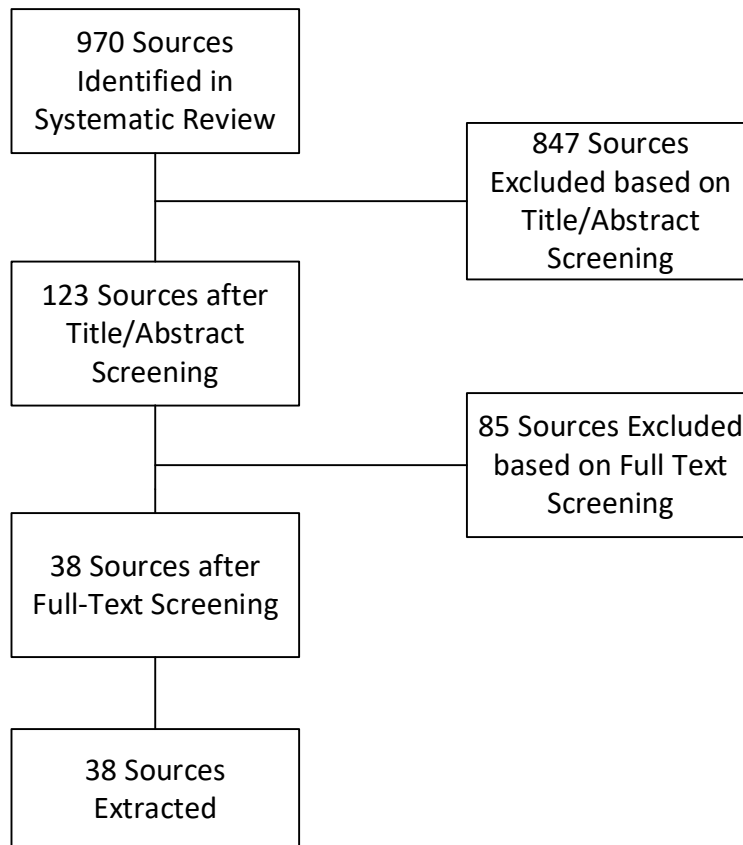

## Modelling Strategy

### Overview

Dementia mortality rates have increased more than five-fold since 1980 in high-quality vital registration systems such as in the US and Scandinavia. We have not seen an equivalent increase in prevalence and incidence data sources. If at all, there has been a modest decline in incidence and prevalence of dementia in studies in the UK and the US.<sup>2,3</sup> Also, the greater than 20-fold variation in mortality rates of dementia between countries is much greater than the four-fold difference in prevalence and incidence between countries. As it is unlikely that case fatality from dementia has dramatically increased over the time period and that it would differ by a very large margin between countries, the hypothesis is that certifying and coding practices have changed over time and at a different pace between countries. To avoid spurious large trends over time in the fatal component of the burden of dementia, we decided for GBD 2013 to make dementia mortality rates consistent with the most recent rates relative to prevalence of countries that are most likely to certify or code dementia as an underlying cause of death. This approach was applied again for GBD 2017 with some modifications, described further below.

<sup>2</sup> Akushevich I, Kravchenko J, Ukraintseva S, Arbeev K, Yashin AI. Time trends of incidence of age-associated diseases in the US elderly population: Medicare-based analysis. *Age and ageing*. 2013 Jul 1;42(4):494-500.

<sup>3</sup> Matthews FE, Arthur A, Barnes LE, Bond J, Jagger C, Robinson L, Brayne C, Medical Research Council Cognitive Function and Ageing Collaboration. A two-decade comparison of prevalence of dementia in individuals aged 65 years and older from three geographical areas of England: results of the Cognitive Function and Ageing Study I and II. *The Lancet*. 2013 Nov 1;382(9902):1405-12.

## Modelling steps

First, we ran a CODEm model for dementia and extracted the mortality rates by age, sex, and geography for 2017. The covariates used in this model are displayed below.

| Level | Covariate                                      | Direction |
|-------|------------------------------------------------|-----------|
| 1     | Diabetes age-specific prevalence               | +         |
|       | Mean BMI                                       | +         |
|       | Cholesterol (total, mean per capita)           | +         |
|       | Systolic blood pressure (mmHg)                 | +         |
|       | Smoking prevalence                             | +         |
|       | Education (years per capita)                   | -         |
| 2     | Outdoor air pollution (PM <sub>2.5</sub> )     | +         |
|       | Physical activity (MET-mins per week)          | -         |
|       | Latitude over 45 (proportion)                  | +         |
|       | Red meat consumption adjusted (g)              | +         |
|       | Healthcare access and quality index            | -         |
| 3     | LDI per capita (I\$ per capita)                | 0         |
|       | Sanitation (proportion with access)            | -         |
|       | Improved water source (proportion with access) | -         |

Second, we ran a DisMod-MR 2.1 model with all data on incidence, prevalence, and mortality risk (RR, SMR, or with-condition mortality rates) and a setting of zero remission and extracted 2017 prevalence by age, sex, and geography. To account for potential systematic differences between medical claims and survey data, we crosswalked the US claims data and added a covariate for European GP data. We also used a linear regression to adjust data collected using the 10/66 diagnostic algorithm, which includes more cases of mild cognitive impairment in comparison to the reference DSM definition.<sup>4</sup> Additionally, to account for systematic differences in different methods of case ascertainment between different studies we used study-level covariates on whether or not studies used a doctor-given diagnosis, whether or not they used clinical records to ascertain a diagnosis, and whether or not a study used an algorithmic diagnosis.

Third, we selected countries where the sum of cause-specific mortality rate to prevalence ratio for males and females exceeded 2.5 (excluding small island nations, those without vital registration, and countries without data on prevalence). This resulted in choosing the Finland, Scotland, Sweden, the United States, England, the Netherlands, and Canada. The choice to pick fewer countries for this regression compared to GBD 2015, which used 30 countries in the EMR regression, was motivated by a desire to reduce the spread in EMR values, as some countries used in the regression can retain their original EMR values. We decided to exclude Finland from the regression, as it is a high outlier compared to the other countries included in the regression. However, we still allowed Finland to retain its original EMR values.

<sup>4</sup> Paddick S-M, Longdon AR, Kisoli A, *et al.* Dementia prevalence estimates in sub-Saharan Africa: comparison of two diagnostic criteria. *Glob Health Action* 2013; 6. DOI:[10.3402/gha.v6i0.19646](https://doi.org/10.3402/gha.v6i0.19646) PMID: PMC3617645.

Fourth, we used a linear effects regression with dummies on age group and sex to predict excess mortality (ie, the ratio of cause-specific mortality rate and prevalence) by age and sex, the results of which are found in the tables below.

**Table: Fixed effect coefficients of EMR regression. Outcome: ln(EMR)**

| Independent variables | Coef   | Std. error | P value | 95% Confidence Interval |        |
|-----------------------|--------|------------|---------|-------------------------|--------|
| Male                  | 0.004  | 0.035      | 0.910   | -0.064                  | 0.072  |
| Age 40-59             | -2.897 | 0.074      | 0.000   | -3.042                  | -2.752 |
| Age 60-64             | -2.267 | 0.074      | 0.000   | -2.412                  | -2.122 |
| Age 65-69             | -2.103 | 0.074      | 0.000   | -2.248                  | -1.958 |
| Age 70-74             | -1.845 | 0.074      | 0.000   | -1.99                   | -1.7   |
| Age 75- 80            | -1.524 | 0.074      | 0.000   | -1.669                  | -1.379 |
| Age 80-84             | -1.217 | 0.074      | 0.000   | -1.362                  | -1.072 |
| Age 85-89             | -0.865 | 0.074      | 0.000   | -1.01                   | -0.72  |
| Age 90-94             | -0.406 | 0.074      | 0.000   | -0.551                  | -0.261 |
| Constant              | -1.748 | 0.055      | 0.000   | -1.856                  | -1.64  |

**Table: Predicted EMR values by age and sex (95% CI)**

|            | Male                  | Female                |
|------------|-----------------------|-----------------------|
| Age 40-59  | 0.01 (0.009 - 0.011)  | 0.01 (0.009 - 0.011)  |
| Age 60-64  | 0.018 (0.016 - 0.02)  | 0.018 (0.016 - 0.02)  |
| Age 65-69  | 0.021 (0.019 - 0.024) | 0.021 (0.019 - 0.024) |
| Age 70-74  | 0.028 (0.025 - 0.031) | 0.028 (0.025 - 0.031) |
| Age 75- 80 | 0.038 (0.034 - 0.042) | 0.038 (0.034 - 0.042) |
| Age 80-84  | 0.052 (0.046 - 0.057) | 0.052 (0.047 - 0.057) |
| Age 85-89  | 0.074 (0.067 - 0.082) | 0.074 (0.066 - 0.082) |
| Age 90-94  | 0.116 (0.105 - 0.13)  | 0.116 (0.104 - 0.129) |
| Age 95+    | 0.175 (0.157 - 0.196) | 0.175 (0.157 - 0.194) |

Fifth, these estimates were added to a second DisMod-MR 2.1 model as pertaining to the full 1990–2017 estimation period. For Finland and the countries included in the regression, we allowed them to retain their original EMR values when the age-standardised EMR for a country was higher than the age-standardised EMR prediction generated from the regression. These countries retained their age- and sex-specific ratios and entered those also as pertaining to the full 1990–2017 estimation period. We excluded data for standardised mortality ratio, with-condition mortality rate, and relative risk as we wanted to estimate cause-specific mortality rates that were consistent with the level of excess mortality from the four chosen countries in 2017. No random effects were used in the model in order to prevent spurious inflation of regional differences due to differences in measurement and measurement error. Smoking prevalence and age-standardised years of education were used as country-level covariates. We did a meta-analysis of the relative risk of dementia per additional year of education and used the results to set bounds on the covariate in the model. The result of that meta-analysis is shown below.

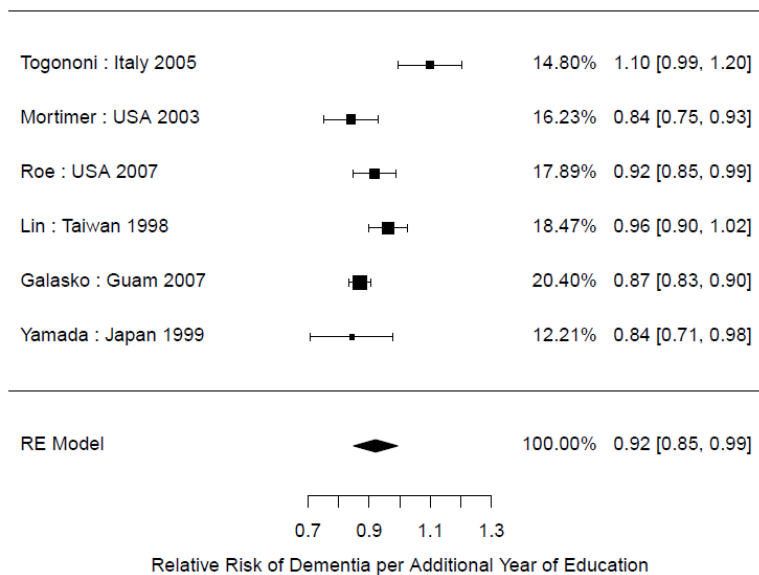

Sixth, we took the predictions of cause-specific mortality by age, sex, geography, and year that DisMod-MR 2.1 calculated as being consistent with the data on incidence and prevalence, and the priors on excess mortality from step five. Because DisMod-MR 2.1 produces estimates in five-year intervals only, we expanded the time series by log-linear interpolation; values for 1980–1990 were generated using a regression on the entire time series with Socio-demographic Index included as a predictor. We divided this cause-specific mortality by the all-cause mortality used in DisMod to calculate the dementia cause-fraction based on prevalence data and the excess mortality derived from countries most likely to code to dementia as a cause of death.

Seventh, we calculated the difference between this cause-fraction derived from DisMod and the cause-fraction derived from the cause of death data prep process before redistribution in order to get the amount of cause fraction that needed to be retrieved from other causes through the dementia redistribution process.

Eighth, in order to calculate where these dementia deaths should be retrieved from, we analysed multiple cause of death (MCO) data. We only used data from the USA and asserted that the data from 2010–2015, during which the increases in coding to dementia as a cause of death leveled off, are the reference data.

Ninth, for deaths where dementia is the underlying cause of death in the years 2010–2015, we calculated what the underlying cause of death would have been in the counterfactual scenario in which dementia had not been recognised. In order to calculate this counterfactual, we examined the causes listed in part one of the chain of the death certificate. For each death certificate chain, we looked across the entire dataset from 1980 to 2015 and determined what the distribution of underlying causes of death was in individuals with that particular death certificate chain. Then, we assigned the counterfactual deaths proportionally to the causes that are listed as underlying in these death certificates. If, over the time period, there were less than 1,000 death certificates that had exactly the same death certificate chain, then we included all death certificate chains that had those same causes, but which could additionally include other causes in the chain as well. To assign counterfactual deaths for these chains, we further subsetted the data to death certificate chains where any of the causes in

the original death certificate chain were listed as underlying, determined the distribution of underlying causes of death among just this subset, and then assigned counterfactual deaths proportionally in the same manner.

Tenth, once we determined the counterfactual causes of death stemming from all dementia deaths from 2010–2015, we calculated the proportion of deaths by cause that should be dementia deaths according to the reference data by taking the counterfactual deaths for each cause and dividing by the sum of the counterfactual deaths for that cause plus the directly coded deaths for that cause.

Eleventh, we applied the proportions to cause of death data in cause fraction space and scaled the cause fractions to the total mortality cause fraction to be retrieved based on the DisMod model. We set caps on the percent of deaths that were moved by age, sex, and cause. The caps were determined by finding the 95<sup>th</sup> percentile of the percentages of deaths moved in each age-sex-cause category across all five-star VR locations. The COD data are then processed using general redistribution strategies and noise reduction.

Finally, the data derived from this process are used in a final CODEm model, using the same covariates as the original CODEm model. These results are then adjusted through CodCorrect and become the final cause of death estimates for dementia.



## Parkinson's Disease

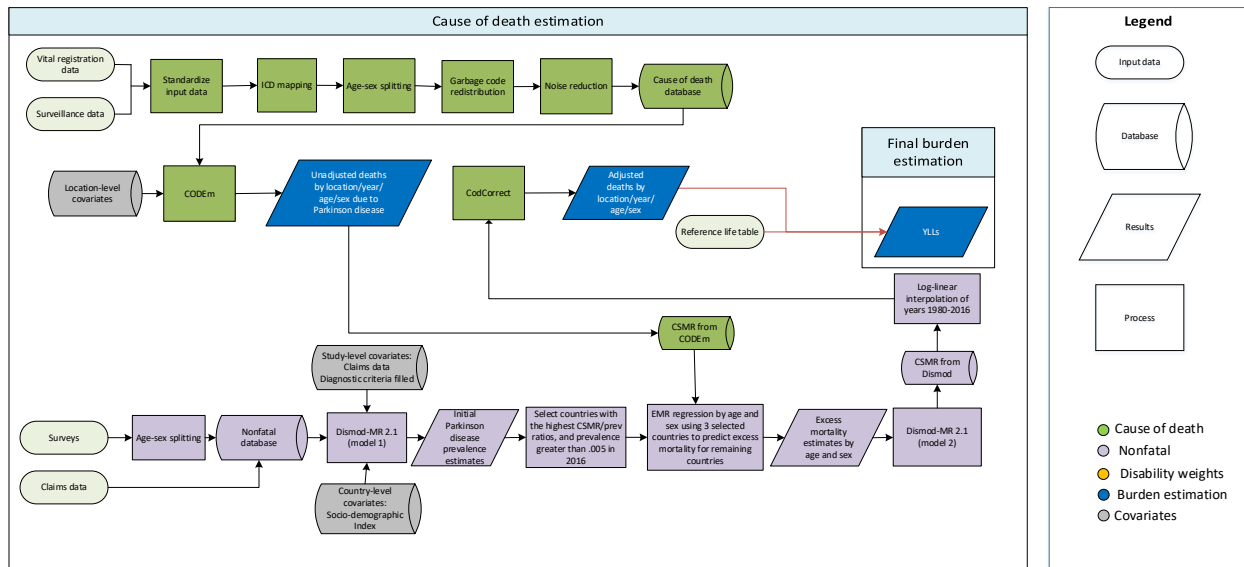

### Input Data

In GBD 2017, data used to estimate deaths due to Parkinson's disease included mortality data from vital registration systems and prevalence data from surveys and claims sources.

An updated systematic review was conducted from September 2015 to August 2017, and search terms<sup>1</sup> were set to capture studies for Parkinson's disease. The search yielded 660 initial hits and 20 were marked for extraction. Inclusion criteria comprised studies that reported prevalence, incidence, remission rate, excess mortality rate, relative risk of mortality, standardised mortality ratio, or with-condition mortality rate. Studies with no clearly defined sample or that drew from specific clinic/patient organizations were excluded. We also added US claims data for 2011 and 2012–2015. A flow chart documenting this review is displayed below.

<sup>1</sup> (Parkinson disease[Title/Abstract] OR Parkinson's disease[Title/Abstract]) AND (epidemiology[Title/Abstract] OR prevalence[Title/Abstract] OR incidence[Title/Abstract]) AND ("2015/09/31"[PDAT] : "2017/08/23"[PDAT])

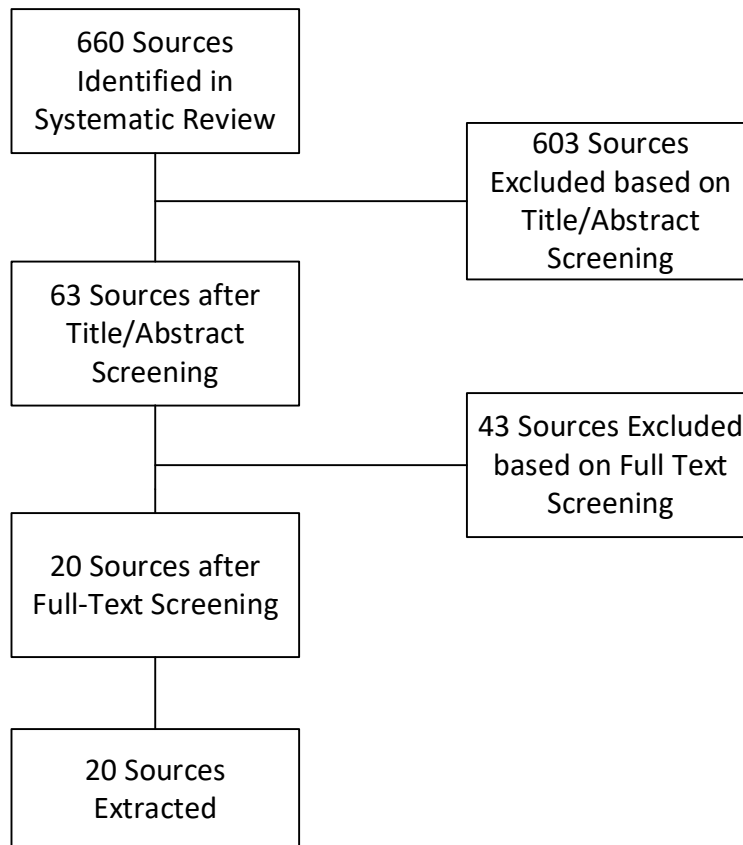

## Modelling Strategy

### Overview

Parkinson’s disease mortality rates have more than doubled since 1980 in high-quality vital registration systems such as in the USA, Canada, Australia, France, Germany, the United Kingdom, and Finland, while other European countries like the Netherlands, Sweden, and Norway have not seen such increases over time. We have not seen an equivalent increase in prevalence and incidence data sources. Additionally, the greater than 15-fold variation in mortality rates of Parkinson’s disease between countries is much greater the three-fold difference in prevalence and incidence between high-income countries. As it is unlikely that case fatality from Parkinson’s disease has dramatically increased over the time period and that it would differ by a very large margin between countries, the hypothesis is that certifying and coding practices have changed over time and at a different pace between countries. For GBD 2016, we decided to employ a modelling strategy which we have previously used to model mortality from Alzheimer’s disease and other dementias, which avoids spurious large trends over time in the fatal component of the burden of Parkinson’s disease by making Parkinson’s mortality rates consistent with the rates observed in 2016, relative to prevalence in countries that are most likely to certify or code Parkinson’s disease as an underlying cause of death. For GBD 2017, we again employed this strategy.

### Modelling steps

First, we ran a CODEm model for Parkinson’s disease and extracted the mortality rates by age, sex, and geography for 2017. The covariates used in this model are displayed below.

| Level | Covariate                                      | Direction |
|-------|------------------------------------------------|-----------|
| 1     | Cumulative cigarette consumption (10 years)    | -         |
| 2     | Absolute latitude                              | +         |
|       | Cholesterol (total, mean per capita)           | +         |
|       | Sanitation (proportion with access)            | 0         |
|       | Improved water source (proportion with access) | 0         |
|       | Fruit consumption adjusted (g)                 | -         |
|       | Healthcare access and quality index            | -         |
| 3     | Education (years per capita)                   | -         |
|       | Socio-demographic Index                        | +         |

Second, we ran a DisMod-MR 2.1 model with all data on incidence, prevalence, and mortality risk (RR, SMR, or with-condition mortality rates) and a setting of zero remission and extracted prevalence by age, sex, and geography. Studies where the case definition of two of the four cardinal symptoms of Parkinson's disease was not filled were crosswalked to studies using the reference case definition. No random effects were used in the model in order to prevent spurious inflation of regional differences due to differences in measurement and measurement error.

Third, we selected the seven countries (France, England, the United States, the Netherlands, Finland, Scotland, and Wales) with the highest cause-specific mortality rate (from step 1) to prevalence (from step 2) ratio in 2017, which also had an age-standardised prevalence rate greater than 0.0005 and a population greater than 1 million.

Fourth, we used a linear effects regression with dummies on age group and sex to predict excess mortality (ie, the ratio of cause-specific mortality rate and prevalence) by age and sex, the results of which are found in the tables below.

**Table:** Fixed effect coefficients of EMR regression. Outcome:  $\ln(\text{EMR})$

| Independent variables | Coef   | Std. error | P value | 95% Confidence Interval |        |
|-----------------------|--------|------------|---------|-------------------------|--------|
| Male                  | 0.288  | 0.036      | 0.000   | 0.218                   | 0.358  |
| Age 40-59             | -3.25  | 0.076      | 0.000   | -3.399                  | -3.101 |
| Age 60-64             | -2.557 | 0.076      | 0.000   | -2.706                  | -2.407 |
| Age 65-69             | -2.021 | 0.076      | 0.000   | -2.17                   | -1.871 |
| Age 70-74             | -1.42  | 0.076      | 0.000   | -1.57                   | -1.271 |
| Age 75- 80            | -0.898 | 0.076      | 0.000   | -1.047                  | -0.749 |
| Age 80-84             | -0.502 | 0.076      | 0.000   | -0.651                  | -0.352 |
| Age 85-89             | -0.248 | 0.076      | 0.001   | -0.397                  | -0.099 |
| Age 90-94             | -0.047 | 0.076      | 0.537   | -0.196                  | 0.102  |
| Constant              | -2.357 | 0.057      | 0.000   | -2.469                  | -2.246 |

**Table:** Predicted EMR values by age and sex (95% CI)

|           | Male                  | Female                |
|-----------|-----------------------|-----------------------|
| Age 40-59 | 0.005 (0.004 - 0.005) | 0.004 (0.003 - 0.004) |
| Age 60-64 | 0.01 (0.009 - 0.011)  | 0.007 (0.007 - 0.008) |
| Age 65-69 | 0.017 (0.015 - 0.019) | 0.013 (0.011 - 0.014) |

|            |                       |                       |
|------------|-----------------------|-----------------------|
| Age 70-74  | 0.031 (0.027 - 0.034) | 0.023 (0.02 - 0.025)  |
| Age 75- 80 | 0.051 (0.046 - 0.057) | 0.039 (0.035 - 0.043) |
| Age 80-84  | 0.076 (0.068 - 0.085) | 0.058 (0.052 - 0.064) |
| Age 85-89  | 0.099 (0.089 - 0.111) | 0.074 (0.066 - 0.083) |
| Age 90-94  | 0.12 (0.108 - 0.135)  | 0.09 (0.081 - 0.1)    |
| Age 95+    | 0.126 (0.113 - 0.142) | 0.095 (0.085 - 0.106) |

Fifth, these estimates were added to a second DisMod-MR 2.1 model as pertaining to the full 1990–2017 estimation period. For the countries included in the regression, we allowed them to retain their original EMR values when the age-standardised EMR for a country was higher than the age-standardised EMR prediction generated from the regression. These countries retained their age- and sex-specific ratios and entered those also as pertaining to the full 1990–2017 estimation period. Smoking prevalence was used as a country-level covariate. We excluded data for standardised mortality ratio, with-condition mortality rate, and relative risk as we wanted to estimate cause-specific mortality rates that were consistent with the level of excess mortality from the seven chosen countries in 2017.

Sixth, we took the predictions of cause-specific mortality by age, sex, geography, and year that DisMod-MR 2.1 calculated as being consistent with the data on incidence and prevalence, and the priors on excess mortality from step five. Because DisMod-MR 2.1 produces estimates in five-year intervals only, we expanded the time series by log-linear interpolation; values for 1980–1990 were generated using a regression on the entire time series with Socio-demographic Index included as a predictor. We divided this cause-specific mortality by the all-cause mortality used in DisMod to calculate the Parkinson’s disease cause-fraction based on prevalence data and the excess mortality derived from countries most likely to code to Parkinson’s disease as a cause of death.

Seventh, we calculated the difference between this cause-fraction derived from DisMod and the cause-fraction derived from the cause of death data prep process before redistribution in order to get the amount of cause fraction that needed to be retrieved from other causes through the Parkinson’s disease redistribution process.

Eighth, in order to calculate where these Parkinson’s disease deaths should be retrieved from, we analysed multiple cause of death (MCO) data. We only used data from the USA and asserted that the data from 2010–2015, during which the increases in coding to Parkinson’s disease as a cause of death leveled off, are the reference data.

Ninth, for deaths where Parkinson’s disease is the underlying cause of death in the years 2010–2015, we calculated what the underlying cause of death would have been in the counterfactual scenario in which Parkinson’s disease had not been recognised. In order to calculate this counterfactual, we examined the causes listed in part one of the chain of the death certificate. For each death certificate chain, we looked across the entire dataset from 1980–2015 and determined what the distribution of underlying causes of death was in individuals with that particular death certificate chain. Then, we assigned the counterfactual deaths proportionally to the causes that are listed as underlying in these death certificates. If, over the time period, there were less than 1,000 death certificates that had exactly the same death certificate chain, then we included all death certificate chains that had those same causes, but which could additionally include other causes in the chain as well. To assign counterfactual deaths for these chains, we further subsetted the data to death certificate chains where any of the causes in the original death certificate chain were listed as underlying, determined the distribution of underlying

causes of death among just this subset, and then assigned counterfactual deaths proportionally in the same manner.

Tenth, once we determined the counterfactual causes of death stemming from all Parkinson's disease deaths from 2010–2015, we calculated the proportion of deaths by cause that should be Parkinson's disease deaths according to the reference data by taking the counterfactual deaths for each cause and dividing by the sum of the counterfactual deaths for that cause plus the directly coded deaths for that cause.

Eleventh, we applied the proportions to cause of death data in cause fraction space and scaled the cause fractions to the total mortality cause fraction to be retrieved based on the DisMod model. We set caps on the percent of deaths that were moved by age, sex and cause. The caps were determined by finding the 95<sup>th</sup> percentile of the percentages of deaths moved in each age-sex-cause category across all five-star VR locations. The COD data are then processed using general redistribution strategies and noise reduction.

Finally, the data derived from this process are used in a final CODEm model, using the same covariates as the original CODEm model. These results are then adjusted through CodCorrect and become the final cause of death estimates for Parkinson's disease.

# Epilepsy

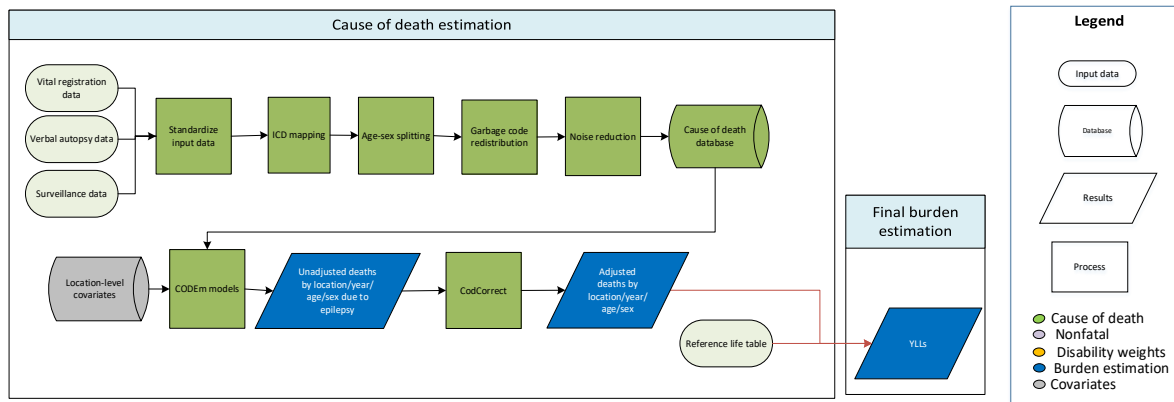

## Input data

Data used to estimate epilepsy mortality included vital registration (VR), verbal autopsy, and China mortality surveillance data from the cause of death (COD) database. Our outlier criteria were to exclude data points that (1) were implausibly high or low relative to global or regional patterns, (2) substantially conflicted with established age or temporal patterns, or (3) significantly conflicted with other data sources based from the same locations or locations with similar characteristics (ie, Socio-demographic Index).

Based on these criteria, we excluded ICD-9 BTL data for Sri Lanka, Fiji, and Kiribati as the estimates varied from year to year between zero and high values. We also excluded the Survey of Causes of Death Data and Medical Certification of Cause of Death Data for India, as these data types were not consistent with the Sample Registration System Data and would have led to discontinuities in our estimates over time.

## Modelling strategy

The standard CODEm modelling approach was applied to estimate deaths due to epilepsy. Separate models were conducted for male and female mortality, and the age range for both models was 28 days–95+ years. There were no substantial changes for GBD 2017. The covariates used are displayed below.

| Level | Covariate                              | Direction |
|-------|----------------------------------------|-----------|
| 1     | pig meat consumption (kcal per capita) | +         |
|       | pigs (per capita)                      | +         |
|       | SEV scalar: epilepsy                   | +         |
|       | mean systolic blood pressure (mmHg)    | +         |

|   |                                       |   |
|---|---------------------------------------|---|
| 2 | healthcare access and quality index   | - |
|   | mean body-mass index                  | + |
|   | mean serum total cholesterol (mmol/L) | + |
| 3 | cumulative cigarettes (10 years)      | + |
|   | cumulative cigarettes (5 years)       | + |
|   | education (years per capita)          | - |
|   | log LDI (per capita)                  | - |
|   | Socio-demographic Index               | - |

## Multiple Sclerosis

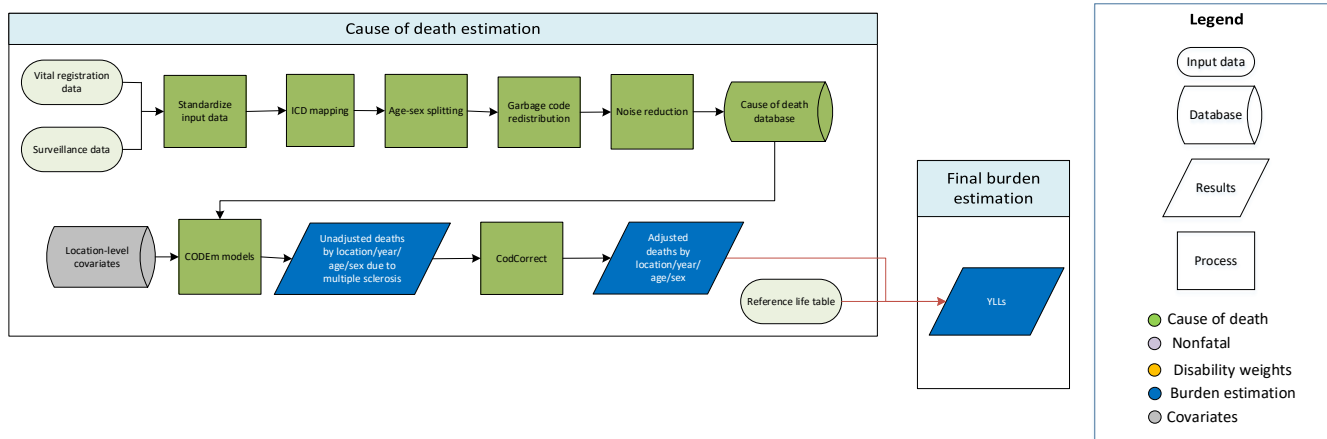

### Input data

Data used to estimate multiple sclerosis included vital registration and surveillance data from the cause of death (COD) database. Our outlier criteria were to exclude data points that (1) were implausibly high or low, (2) substantially conflicted with established age or temporal patterns, or (3) significantly conflicted with other data sources conducted from the same locations or locations with similar characteristics (ie, Socio-demographic Index).

### Modelling strategy

The standard CODEm modelling approach was used to estimate deaths due to multiple sclerosis. Separate models were conducted for male and female mortality, and the age range for both models was 20–95+ years. There were no substantial changes from GBD 2016. The covariates used are displayed below.

| Level | Covariate                             | Direction |
|-------|---------------------------------------|-----------|
| 1     | absolute value of average latitude    | +         |
| 2     | mean serum total cholesterol (mmol/L) | +         |
|       | healthcare access and quality index   | -         |
| 3     | cumulative cigarettes (10 years)      | +         |
|       | cumulative cigarettes (5 years)       | +         |
|       | education (years per capita)          | -         |
|       | log-transformed LDI (per capita)      | -         |
|       | smoking prevalence                    | +         |
|       | Socio-demographic Index               | +         |



## Motor Neuron Disease

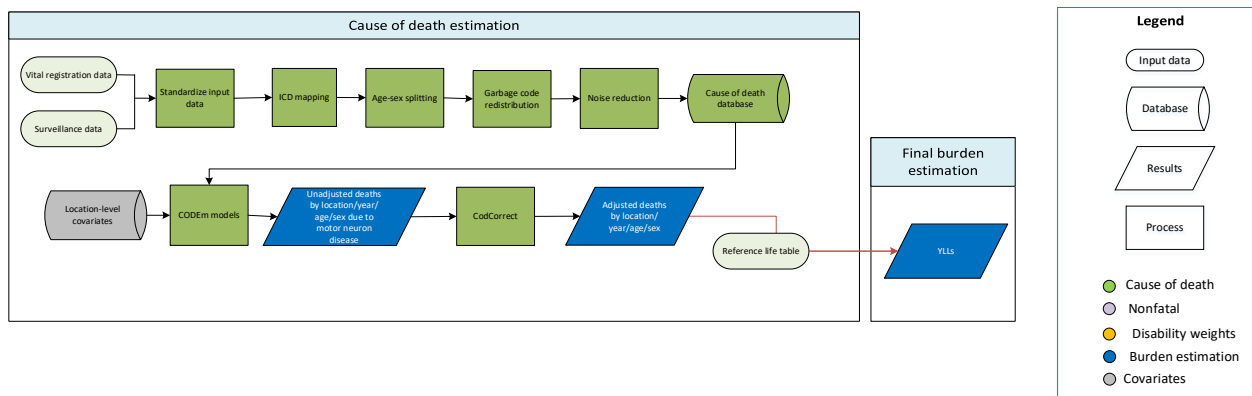

### Input data

Data used to estimate motor neuron disease mortality included vital registration and surveillance data from the cause of death (COD) database. Our outlier criteria excluded data points that (1) were implausibly high or low, (2) substantially conflicted with established age or temporal patterns, or (3) significantly conflicted with other data sources conducted from the same locations or locations with similar characteristics (ie, Socio-demographic Index).

### Modelling strategy

The standard CODEm modelling approach was used to estimate deaths due to motor neuron disease. Separate models were conducted for male and female mortality, and the age range for both models was 20–95+ years. For GBD 2017, we added covariates for BMI, diabetes, and temperature, all of which have been linked to motor neuron disease<sup>i</sup>. There were no other substantial changes from the GBD 2016 modelling strategy. The covariates used are displayed below.

| Level | Covariate                                      | Direction |
|-------|------------------------------------------------|-----------|
| 1     | absolute value of average latitude             | +         |
|       | mean serum total cholesterol (mmol/L)          | 0         |
|       | fruit consumption (grams per day adjusted)     | 0         |
|       | mean diabetes fasting plasma glucose (mmol/L)  | +         |
|       | mean body mass index (kg/m <sup>2</sup> )      | -         |
|       | Socio-demographic Index                        | 0         |
| 2     | population-weighted mean temperature           | 0         |
|       | sanitation (proportion with access)            | 0         |
|       | improved water source (proportion with access) | 0         |
|       | healthcare access and quality index            | -         |
| 3     | education (years per capita)                   | 0         |
|       | log-transformed LDI (per capita)               | 0         |

<sup>i</sup> Ingre C, Roos PM, Piehl F, Kamel F, Fang F. Risk factors for amyotrophic lateral sclerosis. *Clin Epidemiol* 2015; 7: 181–93. PMID: PMC4334292.

## Other Neurological Disorders

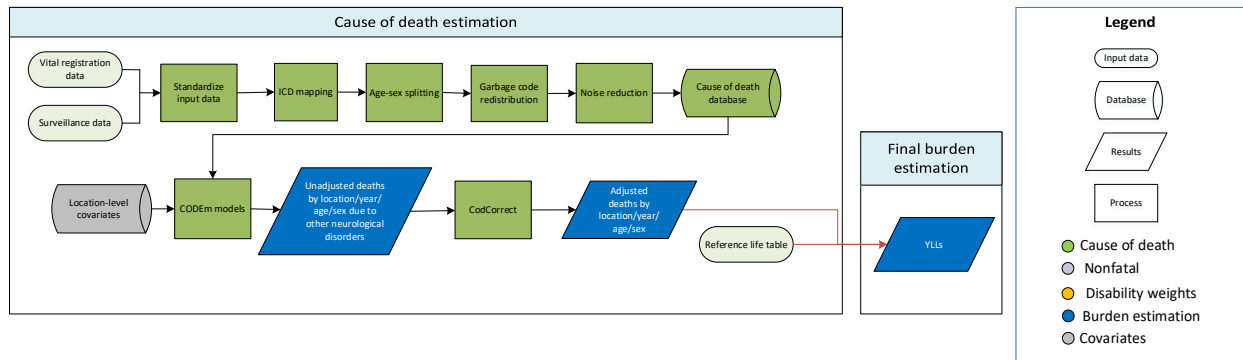

### Input data

Data used to estimate other neurological disorders included vital registration and surveillance data from the cause of death (COD) database. Our outlier criteria were to exclude data points that (1) were implausibly high or low, (2) substantially conflicted with established age or temporal patterns, or (3) significantly conflicted with other data sources conducted from the same locations or locations with similar characteristics (ie, Socio-demographic Index).

### Modelling strategy

The standard CODEm modelling approach was applied to estimate deaths due to other neurological disorders. Male and female CODEm models were run for deaths occurring between ages 28 days to 95+ years. There were no significant changes from the GBD 2016 modelling strategy. The covariates used are displayed below.

| Level | Covariate                                              | Direction |
|-------|--------------------------------------------------------|-----------|
| 1     | underweight proportion under 2 standard deviations     | +         |
|       | mean body-mass index                                   | +         |
|       | mean cholesterol                                       | +         |
|       | mean systolic blood pressure                           | +         |
|       | pig meat consumption (kcal per capita)                 | +         |
|       | red meat consumption adjusted                          | +         |
| 2     | alcohol (litres per capita)                            | +         |
|       | healthcare access and quality index                    | -         |
|       | fruit consumption adjusted                             | -         |
|       | population density over 1,000 per square kilometer pct | +         |
| 3     | cumulative cigarette consumption (10 years)            | +         |
|       | cumulative cigarette consumption (5 years)             | +         |
|       | education (years per capita)                           | -         |
|       | log-transformed LDI (per capita)                       | -         |
|       | smoking prevalence                                     | +         |
|       | Socio-demographic Index                                | 0         |

## Eating Disorders

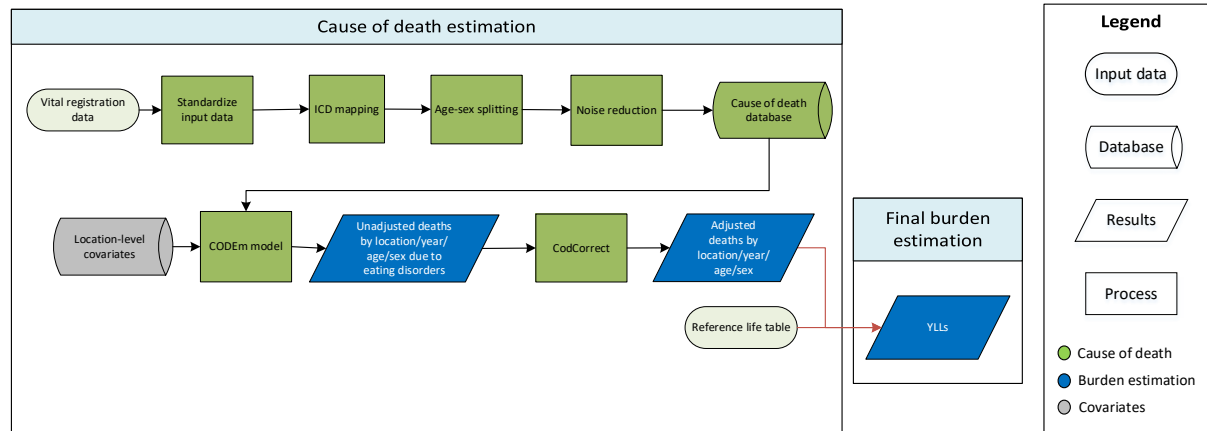

### Input data

Data used to estimate eating disorders mortality included vital registration data from the cause of death (COD) database. No garbage codes were redistributed to eating disorders given previous issues with dehydration deaths in low- and middle-income countries causing unfeasible results.

### Modelling strategy

Eating disorders were modelled using standard CODEm modelling approach and encompassing the two child models of anorexia nervosa and bulimia nervosa. Age was restricted to deaths occurring between 5 and 49 years of age based on expert advice and patterns of prevalence seen in the non-fatal models of anorexia nervosa and bulimia nervosa. Several covariates were applied to this model and are listed in the table below, along with the direction in which they were applied.

| Level | Covariate                                              | Direction |
|-------|--------------------------------------------------------|-----------|
| 1     | education (years per capita)                           | +         |
|       | log LDI (I\$ per capita)                               | +         |
|       | underweight (proportion <2SD weight for age, <5 years) | -         |
|       | sanitation (proportion with access)                    | +         |
|       | maternal education (years per capita)                  | +         |
| 2     | healthcare access and quality index                    | -         |
| 3     | Socio-demographic Index                                | +         |

In GBD 2013, eating disorders were modelled as a negative binomial model using a custom approach. This approach was changed in GBD 2015, with eating disorders being modelled as a standard CODEm model, as no obvious benefit was seen from using the custom modelling approach. GBD 2016 utilised the same approach as GBD 2015 with the only difference being the inclusion of covariates. For GBD

2017, garbage codes were no longer redistributed to eating disorders given the impact of these codes on the feasibility of the geographical distribution. For example, while only a relatively small proportion of dehydration garbage code deaths were redistributed to eating disorders, this added a comparatively large number of deaths to eating disorders, particularly in regions with higher rates of infectious diseases, and they were redistributed equally between males and females despite the prevalence of eating disorders known to be up to ten times higher in females. As such, a decision was made to no longer redistribute garbage codes to eating disorders.

## Anorexia Nervosa

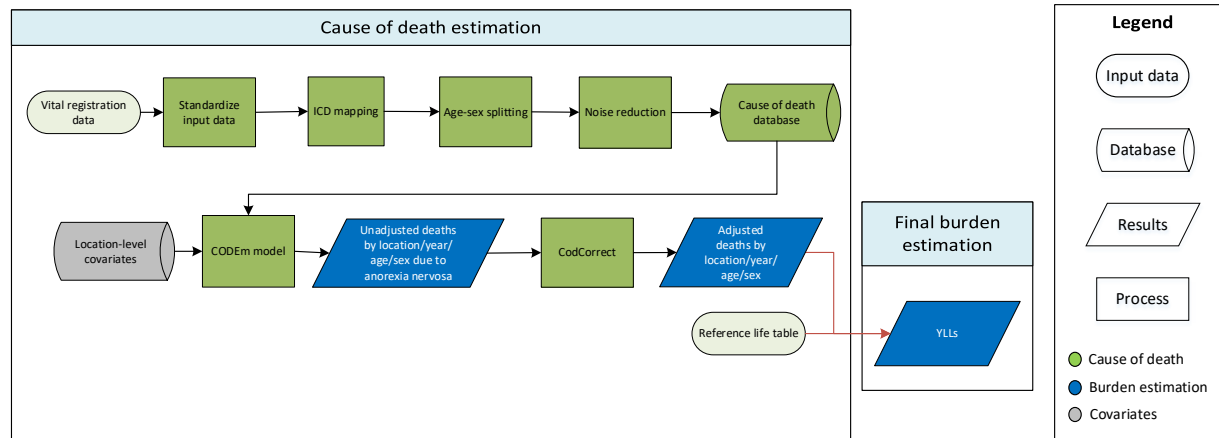

### Input data

Data used to estimate anorexia nervosa mortality included centrally prepped vital registration data from the cause of death (COD) database. No garbage codes were redistributed to anorexia nervosa given previous issues with dehydration deaths in low- and middle-income countries causing unfeasible results.

### Modelling strategy

Anorexia nervosa was modelled using the standard CODEm approach and came under the eating disorders parent model. Age was restricted to deaths occurring between 5 and 49 years based on expert advice and patterns of prevalence seen in the non-fatal model. Several covariates were applied to this model and are listed in the table below, along with the direction in which they were applied.

| Level | Covariate                                              | Direction |
|-------|--------------------------------------------------------|-----------|
| 1     | education (years per capita)                           | +         |
|       | log LDI (I\$ per capita)                               | +         |
|       | underweight (proportion <2SD weight for age, <5 years) | -         |
|       | sanitation (proportion with access)                    | +         |
|       | maternal education (years per capita)                  | +         |
| 2     | healthcare access and quality index                    | -         |
| 3     | Socio-demographic Index                                | +         |

In GBD 2013, anorexia nervosa deaths were extrapolated from the eating disorders model, which was modelled through a negative binomial approach. This approach was changed in GBD 2015, with anorexia nervosa deaths being modelled through a standard CODEm approach under the overarching eating disorders model, as there was no benefit observed from applying the custom approach. GBD 2016 utilised the same approach as GBD 2015 with the only difference being the inclusion of covariates. For

GBD 2017, garbage codes were no longer redistributed to anorexia nervosa given the impact of these codes on the feasibility of the geographical distribution. For example, while only a relatively small proportion of dehydration garbage code deaths were redistributed to anorexia nervosa, this added a comparatively large number of deaths to anorexia nervosa, particularly in regions with higher rates of infectious diseases, and were redistributed equally between males and females despite the prevalence of anorexia nervosa known to be up to ten times higher in females. As such, a decision was made to no longer redistribute garbage codes to anorexia nervosa.

## Bulimia Nervosa

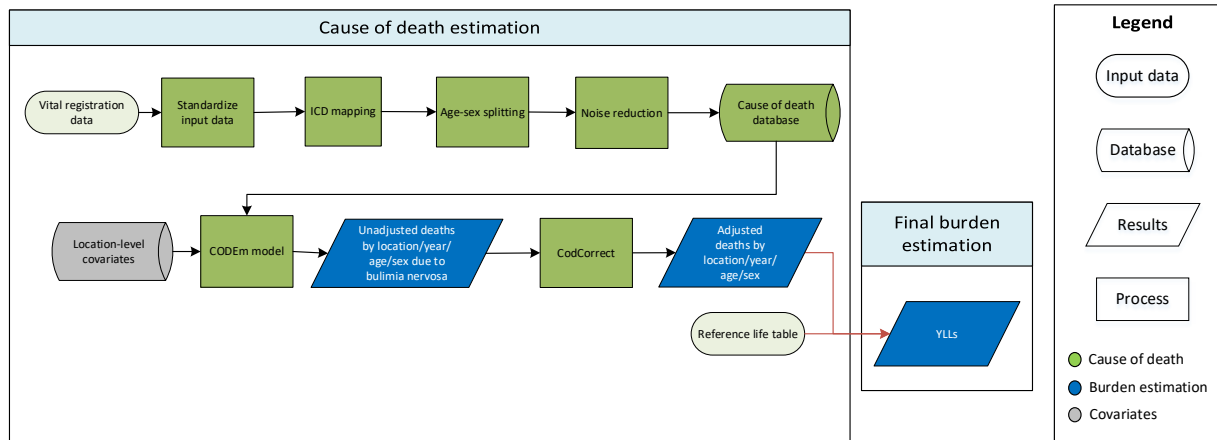

### Input data

Data used to estimate bulimia nervosa mortality included centrally prepped vital registration data from the cause of death (COD) database. No garbage codes were redistributed to bulimia nervosa given previous issues with deaths in low- and middle-income countries causing unfeasible results.

### Modelling strategy

Bulimia nervosa was modelled using the standard CODEm approach and comes under the eating disorders parent model. Age was restricted to deaths occurring between 5 and 49 years based on expert advice and patterns of prevalence seen in the non-fatal model. Several covariates were applied to this model and are listed in the table below, along with the direction in which they were applied.

| Level | Covariate                                              | Direction |
|-------|--------------------------------------------------------|-----------|
| 1     | education (years per capita)                           | +         |
|       | log LDI (I\$ per capita)                               | +         |
|       | underweight (proportion <2SD weight for age, <5 years) | -         |
|       | sanitation (proportion with access)                    | +         |
|       | maternal education (years per capita)                  | +         |
| 2     | healthcare access and quality index                    | -         |
| 3     | Socio-demographic Index                                | +         |

In GBD 2013, bulimia nervosa was not modelled as a distinct cause of death. Any deaths due to bulimia nervosa were attributed to the eating disorders model. We changed this approach in GBD 2015, recognising bulimia nervosa as an individual cause of death, and therefore modelled it as a standard CODEm model under the overarching eating disorders model. This decision was based on observing

deaths due to bulimia nervosa in high-quality vital registration data, such as data from the USA. These data also include eating disorders not otherwise specified. GBD 2016 utilised the same approach as GBD 2015 with the only difference being the inclusion of covariates. For GBD 2017, garbage codes were no longer redistributed to bulimia nervosa given the impact of these codes on the feasibility of the geographical distribution.



## Alcohol Use Disorders

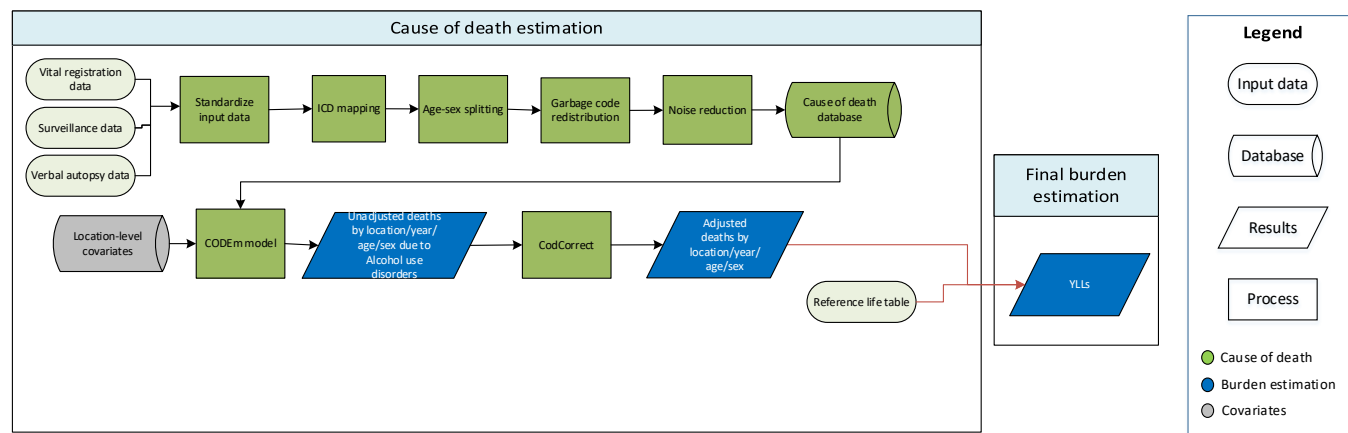

### Input data

All data were from vital registration, China surveillance, and verbal autopsy sources. Some data were outliered from countries with sparse yet heterogeneous data if they created implausible fluctuations in deaths and regional patterns. As an example, Medical Certification of Cause of Death data from India were excluded for alcohol use disorders due to the extremely low estimates.

### Modelling strategy

Cause of death modelling for alcohol use disorders followed the general CODEm strategy. There were no substantial changes from GBD 2017. Model covariate inclusion was based on empirical evidence and expert feedback, which resulted in a set of model covariates that reflected alcohol consumption, smoking, education, health system access, percent of population Muslim, domestic income, and Socio-demographic Index (SDI).

**Table: covariates used in alcohol use disorders CODEm model**

| Level | Covariate                               | Direction |
|-------|-----------------------------------------|-----------|
| 1     | alcohol consumption (litres per capita) | +         |
|       | alcohol binge drinking                  | +         |
| 2     | Muslim religion                         | -         |
|       | cumulative cigarettes (10 years)        | 0         |
|       | smoking prevalence                      | 0         |
|       | healthcare access and quality index     | -         |
| 3     | log LDI (I\$ per capita)                | -         |
|       | education (years per capita)            | -         |
|       | Socio-demographic Index                 | 0         |

In GBD 2017, ICD codes for accidental poisoning (X40-44) were redistributed to the underlying GBD cause (substance use disorder) using an algorithm devised from analysing national registry data from several countries and expert feedback.

## Drug Use Disorders

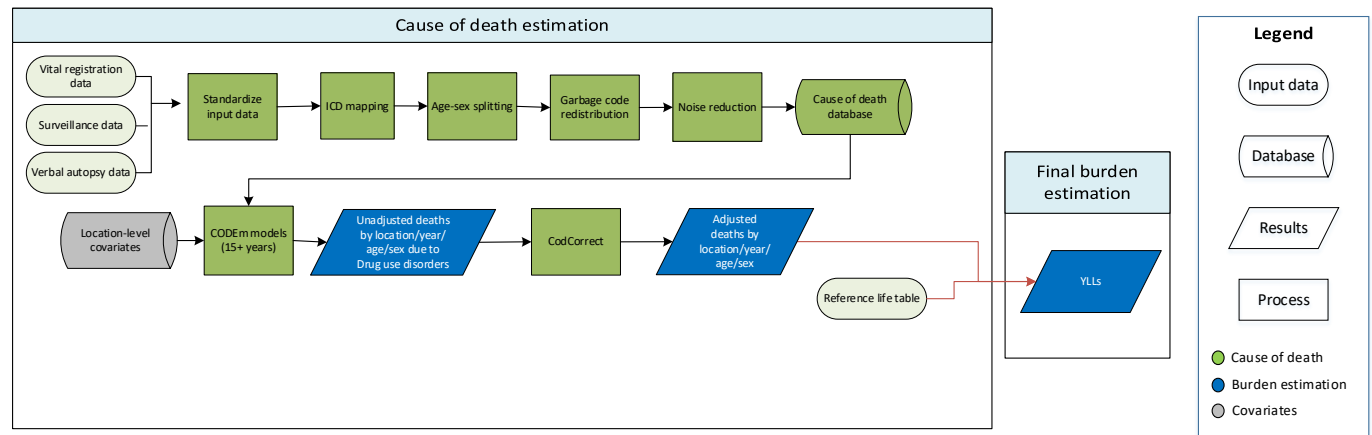

### Input data

All data were from vital registration, verbal autopsy, and surveillance sources. Data from countries with sparse yet heterogeneous data were excluded as the data exaggerated fluctuations in deaths and gave implausible regional patterns. Excluded data were typically from low-income countries. Notably, a considerable amount of Medical Certification of Cause of Death (MCCD) data from India were excluded for drug use disorders. Specifically, it was decided to remove the MCCD ICD-9 data, as a specific garbage redistribution package was not available for that time series. Additionally, it was decided to remove MCCD-ICD10 data from the Northeastern states of Meghalaya, Mizoram, Nagaland, and Manipur (where the much lower values in MCCD compared to SRS removed the expected higher death rates there) and also from the four states of Punjab, Uttarakhand, Jharkand, and Karnataka (where the raw data showed almost no deaths from drug use disorders).

### Modelling strategy

A few key changes were made to the modelling strategy in GBD 2017. Cause of death modelling for drug use disorders still followed the general CODEm strategy; however, in GBD 2017 we specified CODEm to model only space-time (rather than mixed effects) submodels. This was to address unsatisfactory model fits in some locations, particularly in the USA, where the fit from space-time models was better able to follow the large increase in deaths in later years. Additionally, we introduced new covariates: intravenous drug use prevalence, and opioid consumption per million inhabitants per day. The latter covariate is derived from data from the International Narcotics Control Board (INCB), which measures “defined daily doses for statistical purposes” (*S-DDD*), which is considered an approximate measure to rank consumption in different countries.

Another key change in the modelling strategy decision was to no longer run a model for the 0-28 day age group due to the extremely small number of deaths being recorded. Instead, for locations with data in infants, the data were directly applied during post-processing steps, rather than being included in a model.

### Table: covariates used in drug use disorders CODEm model

| Level | Covariate                                               | Direction |
|-------|---------------------------------------------------------|-----------|
| 1     | Intravenous drug use age-standardised                   | +         |
|       | Intravenous drug use age-specific                       | +         |
|       | Opioid standard doses per million per day               | +         |
|       | Opioid standard doses per million per day (5-year lag)  | +         |
|       | Opioid standard doses per million per day (10-year lag) | +         |
| 2     | alcohol use (litres per capita)                         | +         |
|       | cumulative cigarettes (10 years)                        | +         |
|       | cumulative cigarettes (5 years)                         | +         |
|       | opium cultivation bin                                   | +         |
|       | smoking prevalence                                      | +         |
|       | healthcare access and quality index                     | -         |
| 3     | log LDI (I\$ per capita)                                | 0         |
|       | education (years per capita)                            | 0         |
|       | Socio-demographic Index                                 | 0         |

The drug use model is the parent model of all other drug use causes (ie, amphetamine, cocaine, opioid, and other drug). It forms an envelope into which all four individual drug use models are scaled during the CoDCorrect process.

## Opioid Use Disorders

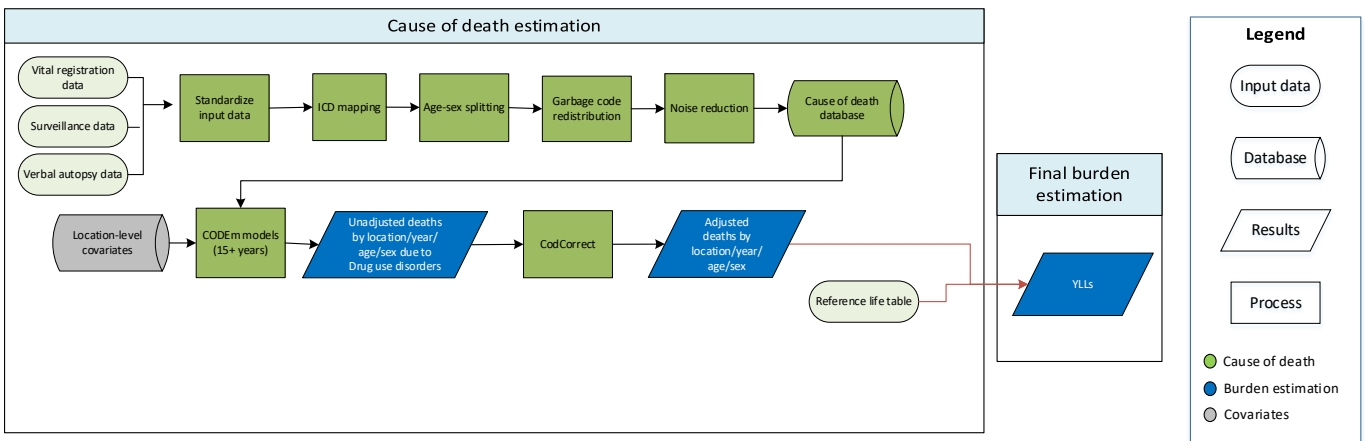

### Input data

All input data were from vital registration and surveillance sources. The locations for which there was the most data included North America, Australia, Western Europe, and parts of Latin America. Mortality data were largely absent from sub-Saharan Africa and South Asia.

### Modelling strategy

A few key changes were made to the modelling strategy in GBD 2017. Cause of death modelling for drug use disorders still followed the general CODEm strategy; however, in GBD 2017 we specified CODEm to model only space-time (rather than mixed effects) models. This was to address unsatisfactory model fits in some locations, particularly in the USA, where the fit from space-time models was better able to follow the large increase in deaths in later years. Additionally, we introduced new covariates: intravenous drug use prevalence from the model used to estimate exposure for the drug use as a risk analyses, and opioid consumption per million inhabitants per day. The latter covariate was derived from data from the International Narcotics Control Board (INCB) which measures “*defined daily doses for statistical purposes*” (*S-DDD*), which translates all different opioids of different types and dosages into comparable units to quantify consumption in different countries.

Another key change in the modelling strategy decision was to no longer run a model for the 0-28 day age group due to the extremely small number of deaths being recorded. Instead, for locations with data in infants, the data were directly applied during post-processing steps, rather than being included in a model.

**Table 1: Covariates used in opioid use CODEm model**

| Level | Covariate                                               | Direction |
|-------|---------------------------------------------------------|-----------|
| 1     | Intravenous drug use age-standardised                   | +         |
|       | Intravenous drug use age-specific                       | +         |
|       | Opioid standard doses per million per day               | +         |
|       | Opioid standard doses per million per day (5-year lag)  | +         |
|       | Opioid standard doses per million per day (10-year lag) | +         |
| 2     | alcohol use (litres per capita)                         | +         |
|       | cumulative cigarettes (10 years)                        | +         |
|       | cumulative cigarettes (5 years)                         | +         |
|       | opium cultivation bin                                   | +         |
|       | smoking prevalence                                      | +         |
|       | healthcare access and quality index                     | -         |
| 3     | log LDI (I\$ per capita)                                | 0         |
|       | education (years per capita)                            | 0         |
|       | Socio-demographic Index                                 | 0         |

A significant limitation to previous drug use models was assumptions surrounding the redistribution of garbage codes. In GBD 2016, and continued in GBD 2017, ICD codes for accidental poisoning (X40-44 and X49) were redistributed to the underlying GBD cause (substance use disorder) using an algorithm devised from analysing multiple cause of death records for the United States, Mexico, Brazil, and Australia from 1980 to 2014. The main assumption behind this algorithm is the dominance of the fatality of some substances when considering a combination of drugs (Table 2).

**Table 2. Algorithm for the selection and assignment of a substance or drug use cause of death for deaths coded to an underlying cause of unintentional poisoning using multiple cause of death data**

| Selection Algorithm               |         |                                   |                        |                        |                                   |                                   |
|-----------------------------------|---------|-----------------------------------|------------------------|------------------------|-----------------------------------|-----------------------------------|
|                                   | Opioids | Cannabis                          | Cocaine                | Amphetamines           | alcohol                           | Psychoactive and psychedelic drug |
| Opioids                           | Opioids | Opioids                           | Opioids                | Opioids                | Opioids                           | Opioids                           |
| Cannabis                          | Opioids | Cannabis                          | Cocaine                | Amphetamines           | alcohol                           | Psychoactive and psychedelic drug |
| Cocaine                           | Opioids | Cocaine                           | Cocaine                | Amphetamines + Cocaine | Cocaine + alcohol                 | Cocaine                           |
| Amphetamines                      | Opioids | Amphetamines                      | Amphetamines + Cocaine | Amphetamines           | Amphetamines + alcohol            | Amphetamines                      |
| alcohol                           | Opioids | alcohol                           | Cocaine + alcohol      | Amphetamines + alcohol | alcohol                           | Psychoactive and psychedelic drug |
| Psychoactive and psychedelic drug | Opioids | Psychoactive and psychedelic drug | Cocaine                | Amphetamines           | Psychoactive and psychedelic drug | Psychoactive and psychedelic drug |

Given that multiple cause of death data were only available to us for the United States, Brazil, Mexico, and Australia, we applied the result from multiple cause of death analysis from the United States to the United States and Canada, from Brazil and Mexico to Latin America and the Caribbean, and from Australia to Australia, New Zealand, Southeast Asia, and Western Europe. For other locations, we aggregated the results from the four countries and applied the aggregate pattern. This is an improvement on the opioid use model from previous rounds of GBD. We hope for increased availability of multiple causes of death data in future analyses in order to achieve a more precise distribution for more locations.

## Cocaine Use Disorders

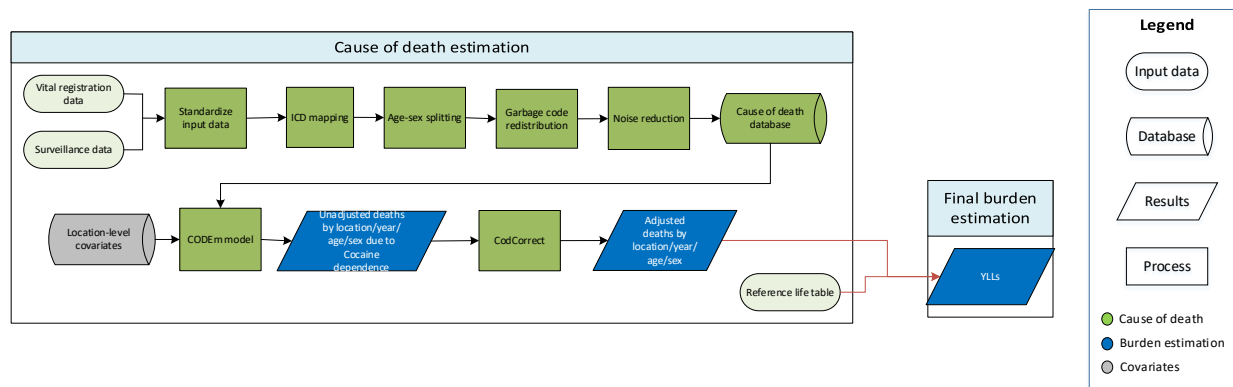

### Input data

All data were from vital registration and surveillance sources. Data from countries with sparse yet heterogeneous data were excluded as the data exaggerated fluctuations in deaths and gave implausible regional patterns. Excluded data were typically from low- and middle-income countries.

### Modelling strategy

Cause of death modelling for cocaine use followed the general CODEm strategy. There were no substantial changes from GBD 2016. Model covariate inclusion was based on empirical evidence and expert feedback, which resulted in a set of model covariates that reflected alcohol consumption, smoking, education, health system access, income per capita, and Socio-demographic Index (SDI) (Table 1).

**Table 1: Covariates used in cocaine use CODEm model**

| Level | Covariate                           | Direction |
|-------|-------------------------------------|-----------|
| 1     | alcohol use (litres per capita)     | +         |
|       | cumulative cigarettes (10 years)    | +         |
|       | cumulative cigarettes (5 years)     | +         |
|       | smoking prevalence                  | +         |
| 2     | healthcare access and quality index | -         |
| 3     | log LDI (I\$ per capita)            | 0         |
|       | education (years per capita)        | 0         |
|       | Socio-demographic Index             | +         |

A significant limitation to previous drug use models was assumptions surrounding the redistribution of garbage codes. In GBD 2016, and continued in GBD 2017, ICD codes for accidental poisoning (X40-44 and X49) were redistributed to the underlying GBD cause (substance use disorder) using an algorithm devised from analysing multiple cause of death records for the United States, Mexico, Brazil, and



Australia from 1980 to 2014. The main assumption behind this algorithm is the dominance of the fatality of some substances when considering a combination of drugs (Table 2).

**Table 2. Algorithm for the selection and assignment of a substance or drug use cause of death for deaths coded to an underlying cause of unintentional poisoning using multiple cause of death data**

| Selection Algorithm               |         |                                   |                        |                        |                                   |                                   |
|-----------------------------------|---------|-----------------------------------|------------------------|------------------------|-----------------------------------|-----------------------------------|
|                                   | Opioids | Cannabis                          | Cocaine                | Amphetamines           | alcohol                           | Psychoactive and psychedelic drug |
| Opioids                           | Opioids | Opioids                           | Opioids                | Opioids                | Opioids                           | Opioids                           |
| Cannabis                          | Opioids | Cannabis                          | Cocaine                | Amphetamines           | alcohol                           | Psychoactive and psychedelic drug |
| Cocaine                           | Opioids | Cocaine                           | Cocaine                | Amphetamines + Cocaine | Cocaine + alcohol                 | Cocaine                           |
| Amphetamines                      | Opioids | Amphetamines                      | Amphetamines + Cocaine | Amphetamines           | Amphetamines + alcohol            | Amphetamines                      |
| alcohol                           | Opioids | alcohol                           | Cocaine + alcohol      | Amphetamines + alcohol | alcohol                           | Psychoactive and psychedelic drug |
| Psychoactive and psychedelic drug | Opioids | Psychoactive and psychedelic drug | Cocaine                | Amphetamines           | Psychoactive and psychedelic drug | Psychoactive and psychedelic drug |

Given that multiple cause of death data were only available to us for the United States, Brazil, Mexico, and Australia, we applied the result from multiple cause of death analysis from the United States to the United States and Canada, from Brazil and Mexico to Latin America and the Caribbean, and from Australia to Australia, New Zealand, Southeast Asia, and Western Europe. For other locations, we aggregated the results from the four countries and applied the aggregate pattern. This is an improvement on the cocaine use model from previous rounds of GBD. We hope for increased availability of multiple causes of death data in future analyses in order to achieve a more precise distribution for more locations.

## Amphetamine Use Disorders

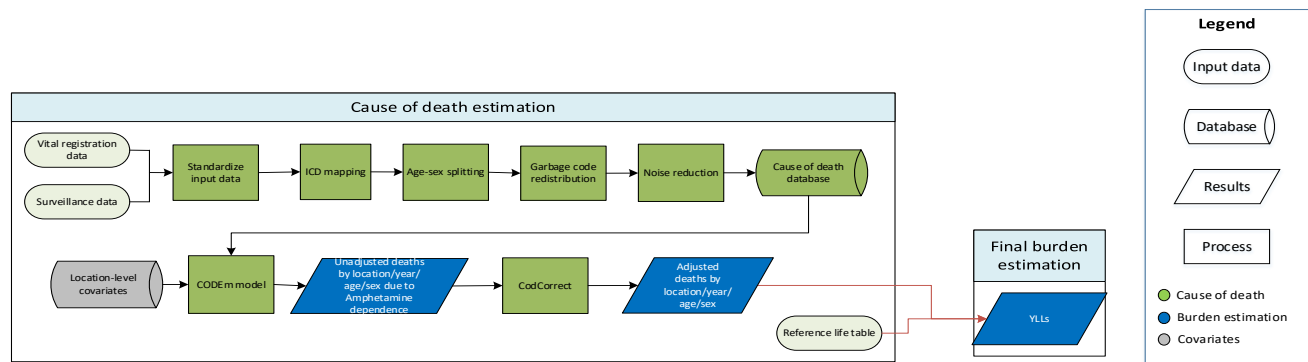

### Input data

All data were from vital registration and surveillance sources. Data from countries with sparse yet heterogeneous data were excluded as the data exaggerated fluctuations in deaths and gave implausible regional patterns. Excluded data were typically from lower-income countries.

### Modelling strategy

Cause of death modelling for amphetamine use followed the general CODEm strategy. There were no substantial changes from GBD 2016. Model covariate inclusion was based on empirical evidence and expert feedback, which resulted in a set of model covariates that reflected alcohol consumption, smoking, education, health system access, domestic income, and Socio-demographic Index (SDI) (Table 1).

**Table 1: Covariates used in amphetamine use CODEm model**

| Level | Covariate                           | Direction |
|-------|-------------------------------------|-----------|
| 1     | alcohol use (litres per capita)     | +         |
|       | cumulative cigarettes (10 years)    | +         |
|       | cumulative cigarettes (5 years)     | +         |
|       | smoking prevalence                  | +         |
| 2     | healthcare access and quality index | -         |
| 3     | log LDI (I\$ per capita)            | 0         |
|       | education (years per capita)        | 0         |
|       | Socio-demographic Index             | +         |

A significant limitation to previous drug use models was assumptions surrounding the redistribution of garbage codes. In GBD 2016, and continued in GBD 2017, ICD codes for accidental poisoning (X40-44 and X49) were redistributed to the underlying GBD cause (substance use disorder) using an algorithm devised from analysing multiple cause of death records for the United States, Mexico, Brazil, and Australia from 1980 to 2014. The main assumption behind this algorithm is the dominance of the fatality of some substances when considering a combination of drugs (Table 2).

**Table 2. Algorithm for the selection and assignment of a substance or drug use cause of death for deaths coded to an underlying cause of unintentional poisoning using multiple cause of death data**

| Selection Algorithm               |         |                                   |                        |                        |                                   |                                   |
|-----------------------------------|---------|-----------------------------------|------------------------|------------------------|-----------------------------------|-----------------------------------|
|                                   | Opioids | Cannabis                          | Cocaine                | Amphetamines           | alcohol                           | Psychoactive and psychedelic drug |
| Opioids                           | Opioids | Opioids                           | Opioids                | Opioids                | Opioids                           | Opioids                           |
| Cannabis                          | Opioids | Cannabis                          | Cocaine                | Amphetamines           | alcohol                           | Psychoactive and psychedelic drug |
| Cocaine                           | Opioids | Cocaine                           | Cocaine                | Amphetamines + Cocaine | Cocaine + alcohol                 | Cocaine                           |
| Amphetamines                      | Opioids | Amphetamines                      | Amphetamines + Cocaine | Amphetamines           | Amphetamines + alcohol            | Amphetamines                      |
| alcohol                           | Opioids | alcohol                           | Cocaine + alcohol      | Amphetamines + alcohol | alcohol                           | Psychoactive and psychedelic drug |
| Psychoactive and psychedelic drug | Opioids | Psychoactive and psychedelic drug | Cocaine                | Amphetamines           | Psychoactive and psychedelic drug | Psychoactive and psychedelic drug |

Given that multiple cause of death data were only available to us for the United States, Brazil, Mexico, and Australia, we applied the result from multiple cause of death analysis from the United States to the United States and Canada, from Brazil and Mexico to Latin America and the Caribbean, and from Australia to Australia, New Zealand, Southeast Asia, and Western Europe. For other locations, we aggregated the results from the four countries and applied the aggregate pattern. This is an improvement on the amphetamine use model from previous rounds of GBD. We hope for increased availability of multiple causes of death data in future analyses in order to achieve a more precise distribution for more locations.

## Other Drug Use Disorders

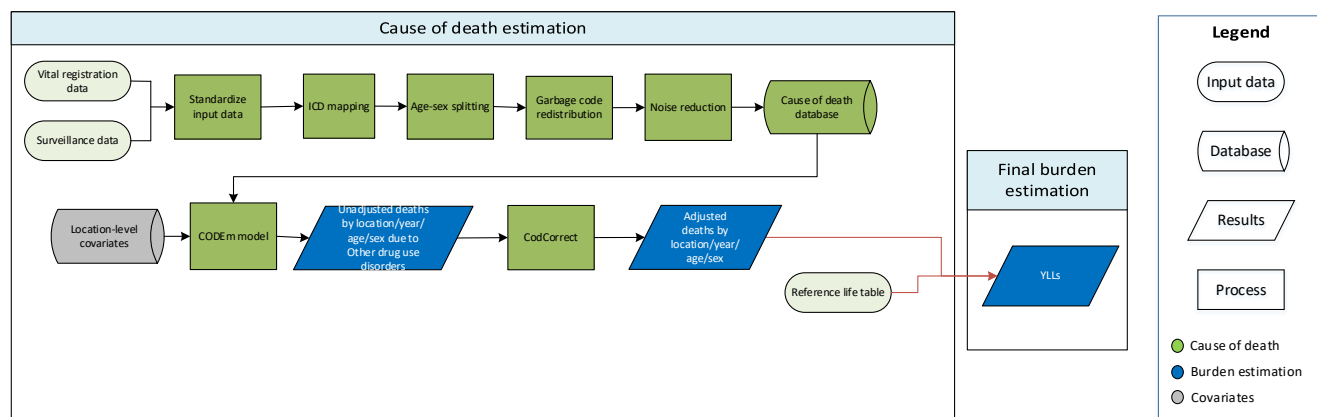

### Input data

All data were from vital registration and China surveillance sources. Data from countries with sparse yet heterogeneous data were excluded as the data exaggerated fluctuations in deaths and gave implausible regional patterns. Excluded data were typically from lower-income countries.

### Modelling strategy

Cause of death modelling for other drug use followed the general CODEm strategy. There were no substantial changes from GBD 2016. Model covariate inclusion was based on empirical evidence and expert feedback, which resulted in a set of model covariates that reflected alcohol consumption, smoking, education, health system access, domestic income, and Socio-demographic Index (SDI) (Table 1).

**Table 1: Covariates used in other drug use CODEm model**

| Level | Covariate                           | Direction |
|-------|-------------------------------------|-----------|
| 1     | alcohol (litres per capita)         | +         |
|       | cumulative cigarettes (10 years)    | +         |
|       | cumulative cigarettes (5 years)     | +         |
|       | smoking prevalence                  | +         |
| 2     | healthcare access and quality index | -         |
| 3     | log LDI (I\$ per capita)            | 0         |
|       | education (years per capita)        | 0         |
|       | Socio-demographic Index             | 0         |

A significant limitation to previous drug use models was assumptions surrounding the redistribution of garbage codes. In GBD 2016, and continued in GBD 2017, ICD codes for accidental poisoning (X40-44 and X49) were redistributed to the underlying GBD cause (substance use disorder) using an algorithm devised from analysing multiple cause of death records for the United States, Mexico, Brazil, and Australia from 1980 to 2014. The main assumption behind this algorithm is the dominance of the fatality of some substances when considering a combination of drugs (Table 2).

**Table 2. Algorithm for the selection and assignment of a substance or drug use cause of death for deaths coded to an underlying cause of unintentional poisoning using multiple cause of death data**

| Selection Algorithm               |         |                                   |                        |                        |                                   |                                   |
|-----------------------------------|---------|-----------------------------------|------------------------|------------------------|-----------------------------------|-----------------------------------|
|                                   | Opioids | Cannabis                          | Cocaine                | Amphetamines           | alcohol                           | Psychoactive and psychedelic drug |
| Opioids                           | Opioids | Opioids                           | Opioids                | Opioids                | Opioids                           | Opioids                           |
| Cannabis                          | Opioids | Cannabis                          | Cocaine                | Amphetamines           | alcohol                           | Psychoactive and psychedelic drug |
| Cocaine                           | Opioids | Cocaine                           | Cocaine                | Amphetamines + Cocaine | Cocaine + alcohol                 | Cocaine                           |
| Amphetamines                      | Opioids | Amphetamines                      | Amphetamines + Cocaine | Amphetamines           | Amphetamines + alcohol            | Amphetamines                      |
| alcohol                           | Opioids | alcohol                           | Cocaine + alcohol      | Amphetamines + alcohol | alcohol                           | Psychoactive and psychedelic drug |
| Psychoactive and psychedelic drug | Opioids | Psychoactive and psychedelic drug | Cocaine                | Amphetamines           | Psychoactive and psychedelic drug | Psychoactive and psychedelic drug |

Given that multiple cause of death data were only available to us for the United States, Brazil, Mexico, and Australia, we applied the result from multiple cause of death analysis from the United States to the United States and Canada, from Brazil and Mexico to Latin America and the Caribbean, and from Australia to Australia, New Zealand, Southeast Asia, and Western Europe. For other locations, we aggregated the results from the four countries and applied the aggregate pattern. This is an improvement on the other drug use model from previous rounds of GBD. We hope for increased availability of multiple causes of death data in future analyses in order to achieve a more precise distribution for more locations.

## Diabetes Mellitus

Diabetes mellitus mortality was estimated for overall diabetes mellitus, diabetes mellitus type 1, and diabetes mellitus type 2 in GBD 2017. We included neonatal diabetes with type 1 diabetes and gestational diabetes with type 2 diabetes. For full accounting of associated ICD 9 and ICD 10 codes, please refer to Appendix Table 4.

### Overall Diabetes Mellitus

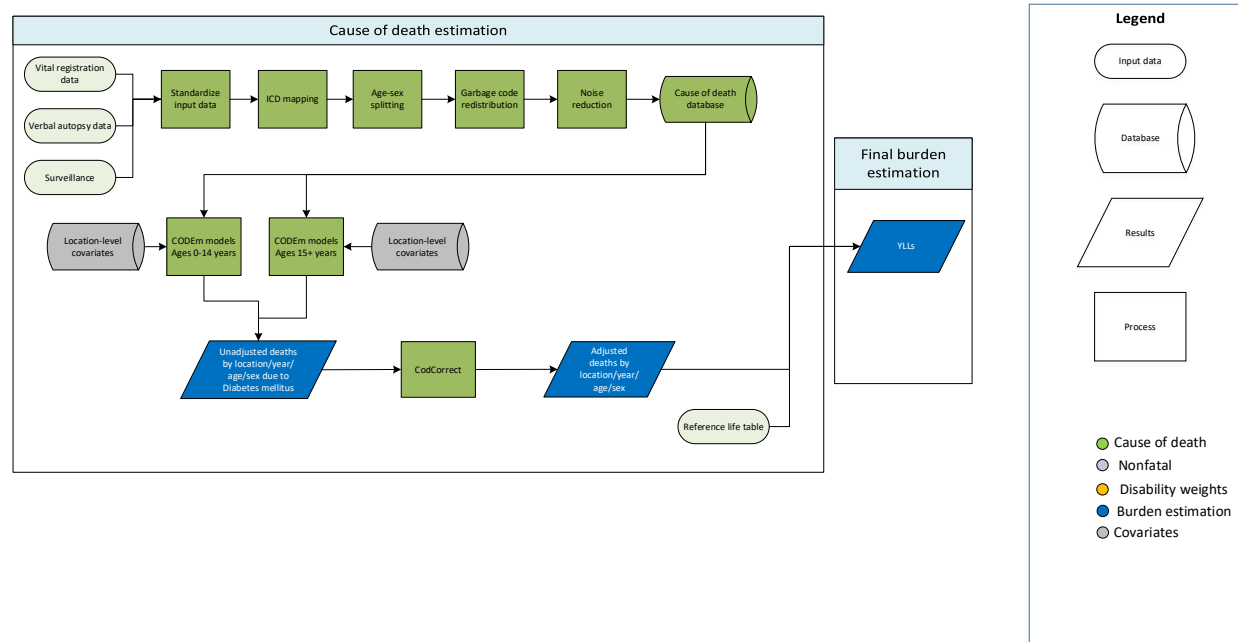

#### Input data

Overall diabetes mellitus mortality was estimated using deaths directly attributed to diabetes mellitus. We used verbal autopsy and vital registration data as inputs into the model.

**Verbal autopsy data:** We outliered data points from sources where there were zero deaths estimated in an age group as this was not realistic for deaths due to diabetes and we determined that these data sources were unreliable.

**Vital registration data:** We outliered all data from the India Medical Certification of Cause of Death report since the source of the data was unreliable according to expert opinion. We also outliered ICD9BTL data points that were inconsistent with the rest of the data series and created unlikely time trends.

#### Modelling strategy

The Cause of Death Ensemble model (CODEm) was used for deaths due to diabetes mellitus estimation.

In the overall diabetes mellitus model, we used two models to estimate overall diabetes deaths with different age restrictions. This is because deaths in younger age groups are almost exclusively due to type 1 diabetes, while deaths in older ages are primarily due to type 2 diabetes. This allowed us to select predictive covariates that are specific to the pathophysiology of diabetes type 1 and type 2. We set the younger age model from 0-14 years and the older age model from 15-95+ years. We determined the age threshold based on evidence that the onset age of diabetes type 2 is occurring at younger ages.

### Covariate selection

The following are the covariates included in the model. We were able to set an expected direction on each covariate. This requires that the covariate selected for the model must have the directional relationship with diabetes mellitus deaths.

| Model      | Level | Covariate                                                               | Direction |
|------------|-------|-------------------------------------------------------------------------|-----------|
| 0-14 years | 1     | Healthcare access and quality index                                     | -         |
|            | 3     | Education years per capita                                              | -         |
|            | 2     | Age-standardised fertility rate                                         | +         |
|            | 2     | Latitude                                                                | +         |
|            | 2     | Age-standardised underweight (weight-for-age) summary exposure variable | -         |
|            | 2     | Percentage of births occurring in women >35 years old                   | +         |
|            | 2     | Percentage of births occurring in women >40 years old                   | +         |
|            | 3     | Socio-demographic Index                                                 | -         |
|            | 2     | Age-standardised stunting (height-for-age) summary exposure variable    | -         |
|            | 2     | Mean birth weight                                                       | -         |
| 15 + model | 1     | Age-standardised mean fasting plasma glucose (mmol/L)                   | +         |
|            | 1     | Age-standardised prevalence of diabetes                                 | +         |
|            | 3     | Education years per capita                                              | +/-       |
|            | 3     | Lag-distributed income per capita                                       | +/-       |
|            | 1     | Mean BMI                                                                | +         |
|            | 2     | Mean cholesterol                                                        | +/-       |
|            | 2     | Mean systolic blood pressure                                            | +/-       |
|            | 1     | Prevalence of obesity                                                   | +         |
|            | 2     | Energy-adjusted grams of fruits                                         | +/-       |
|            | 2     | Energy-adjusted grams of sugar                                          | +         |
|            | 2     | Energy-adjusted grams of vegetables                                     | +/-       |
|            | 3     | Healthcare access and quality index                                     | +/-       |

# Diabetes mellitus Type 1 and Type 2

## Diabetes mellitus Type 1

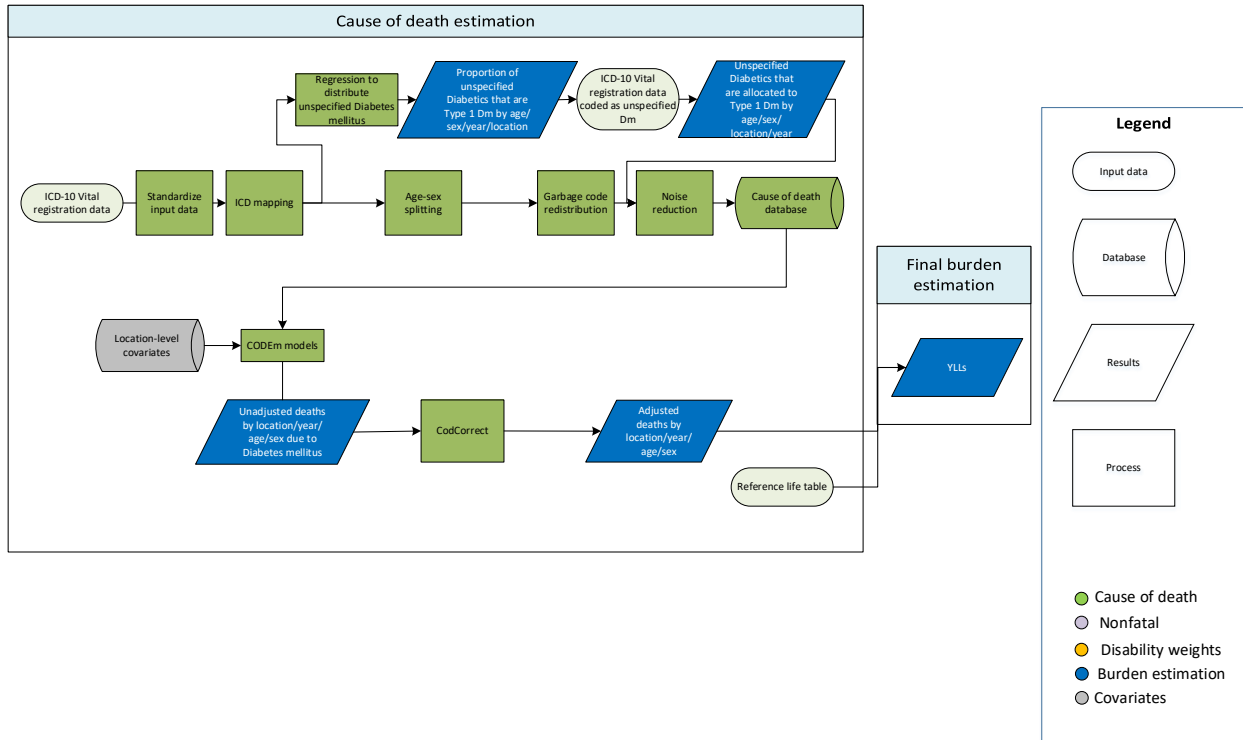



## Diabetes mellitus Type 2

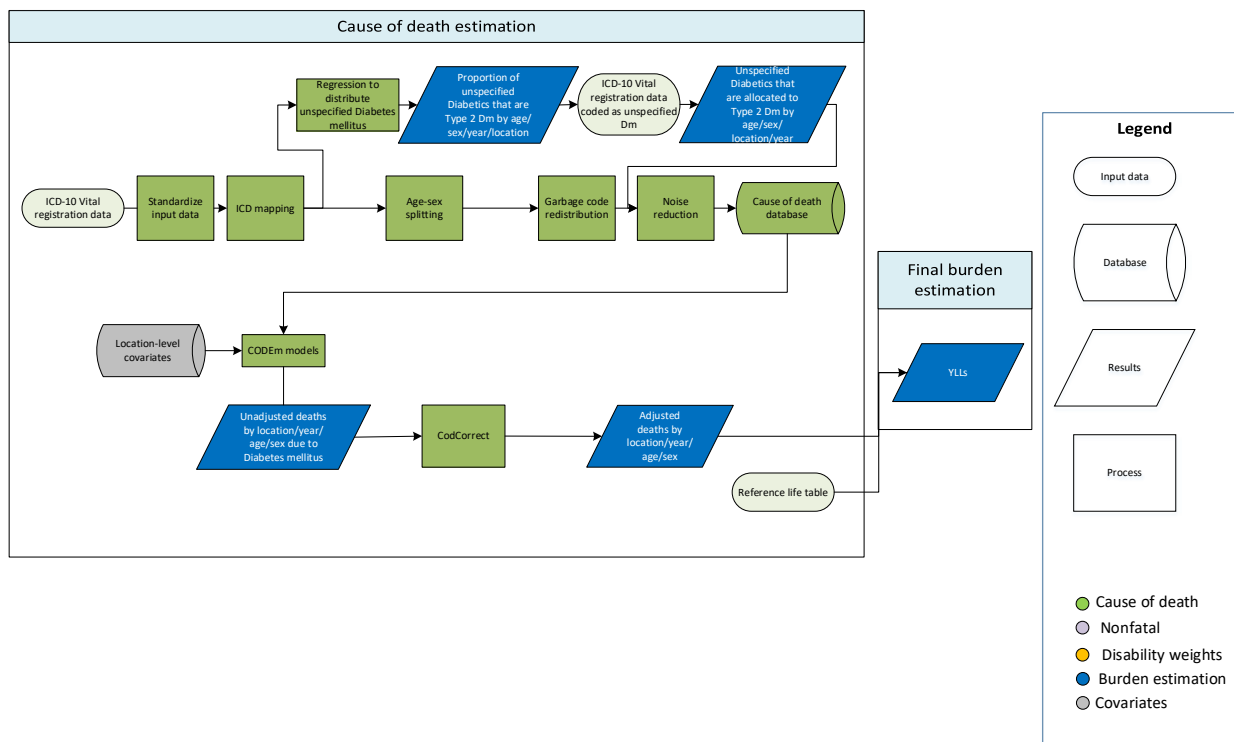

### Input data

Type-specific diabetes mellitus mortality was estimated using deaths from vital registration sources in ICD-10 codes only. Diabetes type-specific information was not available in ICD-9 codes or deaths determined by verbal autopsy.

### Modelling strategy

The Cause of Death Ensemble model (CODem) was used for deaths due to diabetes mellitus estimation.

Deaths in younger age groups are almost exclusively due to type 1 diabetes, while deaths in older ages are primarily due to type 2 diabetes. To account for this age pattern, we set the age range of the diabetes type 1 model to 0-95+ years and the age range of the diabetes type 2 model to 15-95+ years. We used the same covariates in the diabetes type 1 model and diabetes type 2 model as the 0-14 year and 15-95+ year in the overall diabetes models, respectively.

There were two unique data manipulation steps that occurred in order to prepare the data as part of the modelling process.

1. We assumed that all deaths <15 years were due to type 1 regardless of the ICD-10 code assigned to the death. We imposed 100% attribution of diabetes mellitus deaths in <15 years to type 1 diabetes mellitus.
2. ICD-10 diabetes data were reported as type 1, type 2, or unspecified. We developed a regression to estimate the fraction of unspecified diabetes mellitus that was type 1 and type 2. Since there is a separate regression to estimate the proportion of type 1 diabetes mellitus and type 2 diabetes mellitus, we scaled the predicted proportions to one. These scaled proportions were then applied to number of deaths coded to unspecified diabetes in each location, year, sex where ICD-10 data was reported.

### Regression equation

Type 1:

$$\text{logit} \left( \frac{\text{number type 1 DM}}{\text{number total DM}} \right) \sim \text{logit} \left( \frac{\text{number unspecified DM}}{\text{number total DM}} \right) + \beta_1 \text{age group} + \beta_2 \text{age-st prev obesity} * \text{age group} + \text{age-st prev obesity}$$

Type 2:

$$\text{logit} \left( \frac{\text{number type 2 DM}}{\text{number total DM}} \right) \sim \text{logit} \left( \frac{\text{number unspecified DM}}{\text{number total DM}} \right) + \beta_1 \text{age group} + \beta_2 \text{age-st prev obesity} * \text{age group} + \text{age-st prev obesit}$$

### Covariate selection

The following are the covariates included in the model. We were able to set an expected direction on each covariate. This requires that the covariate selected for the model must have the directional relationship with diabetes mellitus deaths.

| Model  | Level | Covariate                                                               | Direction |
|--------|-------|-------------------------------------------------------------------------|-----------|
| Type 1 | 1     | Healthcare access and quality index                                     | -         |
|        | 3     | Education years per capita                                              | -         |
|        | 2     | Age-standardised fertility rate                                         | +         |
|        | 2     | Latitude                                                                | +         |
|        | 2     | Age-standardised underweight (weight-for-age) summary exposure variable | -         |
|        | 2     | Percentage of births occurring in women >35 years old                   | +         |
|        | 2     | Percentage of births occurring in women >40 years old                   | +         |
|        | 3     | Socio-demographic Index                                                 | -         |

|        |   |                                                                      |     |
|--------|---|----------------------------------------------------------------------|-----|
|        | 2 | Age-standardised stunting (height-for-age) summary exposure variable | -   |
|        | 2 | Mean birth weight                                                    | -   |
| Type 2 | 1 | Age-standardised mean fasting plasma glucose (mmol/L)                | +   |
|        | 1 | Age-standardised prevalence of diabetes                              | +   |
|        | 3 | Education years per capita                                           | +/- |
|        | 3 | Lag-distributed income per capita                                    | +/- |
|        | 1 | Mean BMI                                                             | +   |
|        | 2 | Mean cholesterol                                                     | +/- |
|        | 2 | Mean systolic blood pressure                                         | +/- |
|        | 1 | Prevalence of obesity                                                | +   |
|        | 2 | Energy-adjusted grams of fruits                                      | +/- |
|        | 2 | Energy-adjusted grams of sugar                                       | +   |
|        | 2 | Energy-adjusted grams of vegetables                                  | +/- |
|        | 3 | Healthcare access and quality index                                  | +/- |

## Chronic Kidney Disease

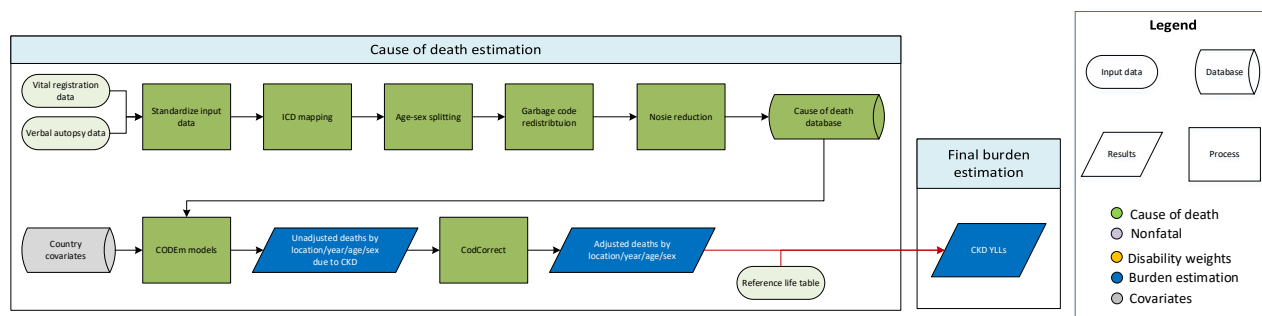

### Input data

Vital registration and verbal autopsy data were used to model mortality due to chronic kidney disease. Outliers were identified by systematic examination of data points for all location-years. Data were standardised and mapped according to the GBD causes of death ICD mapping method. These data were then age-sex split, and appropriate redistribution of garbage code data was performed. Data points that violated well-established age or time trends or that resulted in extremely high or low cause fractions were determined to be outliers. Deaths due to congenital kidney anomalies (cystic kidney disease and reflux hydronephrosis) were attributed to chronic kidney disease, marking a change from GBD 2015, when these deaths were assigned to congenital anomalies.

### Modelling strategy

The estimation strategy used for fatal chronic kidney disease is largely similar to methods used in GBD 2016. A standard CODEm model with location-level covariates was used to model deaths due to chronic kidney disease. Iterations of models were assessed at the location/year/age group/sex level to determine whether data points merited exclusion via outliering. Unadjusted death estimates were adjusted using CoDCorrect to produce final estimates of YLLs. The covariates used are displayed below.

| Level | Covariate                                         | Direction |
|-------|---------------------------------------------------|-----------|
| 1     | Diabetes fasting plasma glucose (mmol/L)          | +         |
|       | Diabetes age-standardised prevalence (proportion) | +         |
|       | Mean systolic blood pressure (mmHg)               | +         |
|       | Mean BMI                                          | +         |
|       | Healthcare access and quality index               | -         |
| 2     | Mean cholesterol                                  | +         |
|       | Total calories (kcal per capita)                  | -         |
|       | Red meat (kcal per capita)                        | 0         |
|       | Whole grains (kcal per capita)                    | 0         |
|       | Animal fat (kcal per capita)                      | 0         |
| 3     | Socio-demographic Index                           | 0         |
|       | Education (years per capita)                      | -         |
|       | Log LDI (\$I per capita)                          | -         |

## Chronic Kidney Disease subtypes

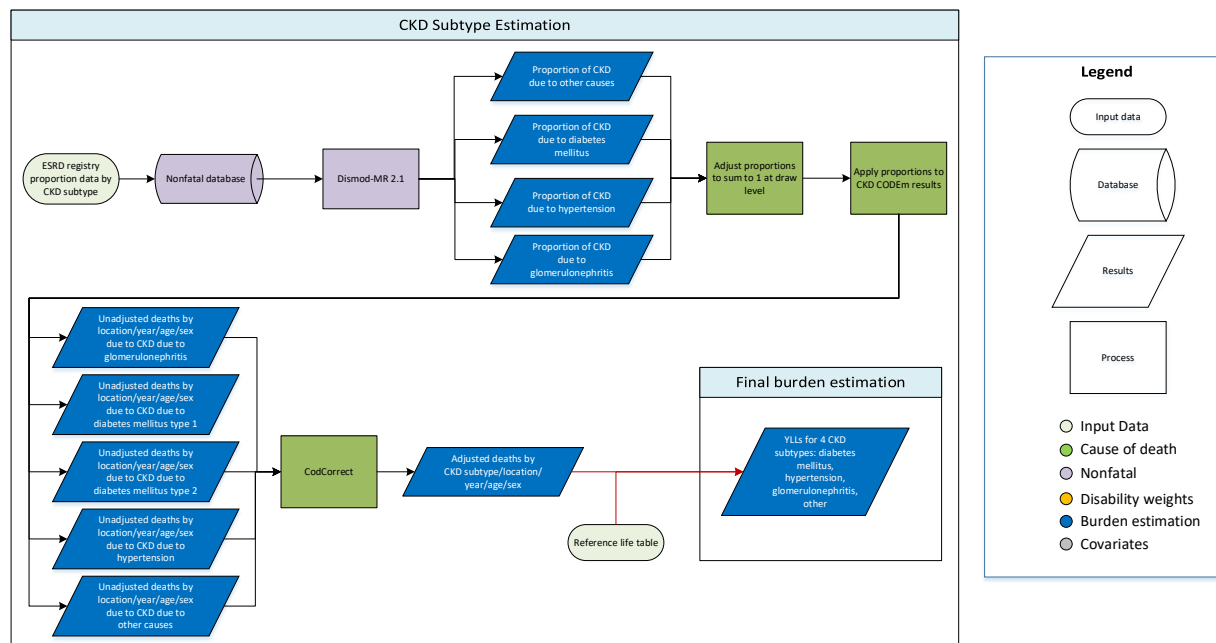

### Input data

We estimated deaths due to five subtypes of chronic kidney disease: diabetes mellitus (DM) type 1, diabetes mellitus (DM) type 2, hypertension, glomerulonephritis, and other causes. Data from end-stage renal disease registries were used to inform estimates of proportion of CKD mortality attributable to each CKD subtype. Age-specific data on the proportion of ESRD by subtype was available from the United States, Australia, New Zealand, Nigeria, and Russia. Given the geographic spread in availability of age-specific proportion data, input data were not age-split, marking a change from GBD 2016.

Vital registration (VR) data were excluded from estimates, as aetiology coding in VR sources was considered highly variable and inconsistent between countries.

### Modelling strategy

We ran DisMod-MR 2.1 models including diabetes prevalence and mean systolic blood pressure as country-level covariates to obtain estimates of proportions for each subtype by location, year, age, and sex. Data for CKD due to overall DM were more widely available than data by type of DM. In order to make use of all available data, we modelled the proportion of CKD due to overall DM, DM type 1, and DM type 2. Proportion of CKD due to DM type 1 and DM type 2 were then scaled to sum to the proportion of overall DM at the gender, age, and country-matched level. The results from all subtype-specific models were adjusted so that estimates across the subtypes equaled 1 at each of 1,000 draws. These adjusted proportions were applied to the parent CKD CODEm model.

| <b>Model</b>                            | <b>Covariate</b>                     | <b>Value</b>         | <b>Exponentiated</b> |
|-----------------------------------------|--------------------------------------|----------------------|----------------------|
| CKD proportion due to diabetes mellitus | Diabetes age-standardised prevalence | 0.49<br>(0.36–0.61)  | 1.63<br>(1.44–1.84)  |
| CKD proportion due to hypertension      | Mean systolic blood pressure         | 0.30<br>(0.010–1.05) | 1.35<br>(1.01–2.86)  |

## Acute Glomerulonephritis

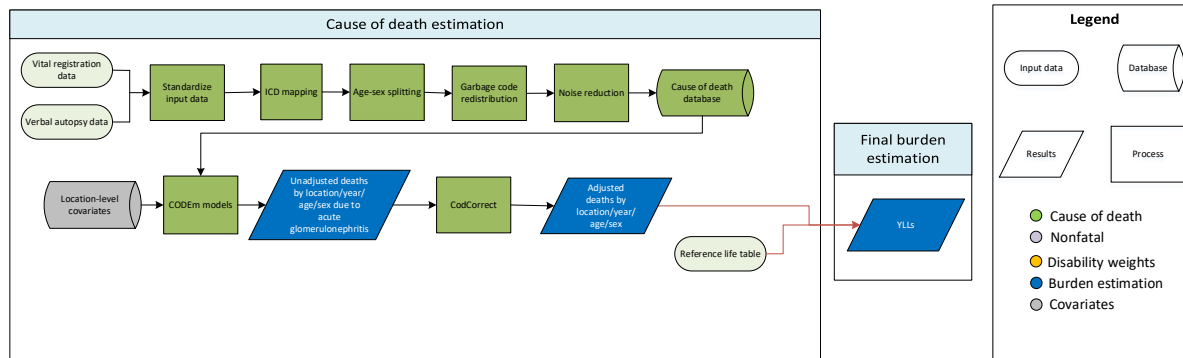

### Input data

Vital registration data were used to model mortality due to acute glomerulonephritis. Vital registration data were standardised and mapped according to the GBD causes of death ICD mapping method. These data were then age-sex split, and appropriate redistribution of garbage code data was performed. After applying noise reduction, these data were uploaded to the COD database. Outliers were identified by systematic examination of data points for all location-years. Data points that violated well-established age or time trends or that resulted in extremely high or low cause fractions were determined to be outliers.

### Modelling strategy

The estimation strategy used for fatal acute glomerulonephritis is largely similar to methods used in GBD 2016. A standard CODEm model with location-level covariates was used to model deaths due to acute glomerulonephritis. The linear floor is a model setting which indicates the lowest death rate (per 100,000) to be used in the linear prediction step of the cause of death modelling process. For GBD 2017, the linear floor was reduced from a value of 0.01 used in GBD 2016 to a value of 0.0001 to allow the model to better fit input data when the cause fraction is extremely low. This change has resulted in lower estimates of mortality rate due to acute glomerulonephritis in many geographies. Age-restrictions for death estimations secondary to acute glomerulonephritis include 28 days for lower bound and 95+ for upper bound. Iterations of models were assessed at the location/year/age group/sex level to determine whether data points merited exclusion via outliering. Unadjusted death estimates were adjusted using CoDCorrect to produce final estimates of YLLs. Estimates are limited by a paucity of data for regions such as Eastern and Central sub-Saharan Africa. The covariates used are displayed below.

| Level | Covariate                                       | Direction |
|-------|-------------------------------------------------|-----------|
| 2     | Diabetes age-standardised prevalence            | +         |
|       | Mean systolic blood pressure (mmHg)             | +         |
|       | Sanitation (proportion with access)             | -         |
|       | Improved water sources (proportion with access) | -         |
|       | Healthcare access and quality index             | -         |
| 3     | Socio-demographic Index                         | -         |
|       | Education (years per capita)                    | -         |
|       | Log LDI (\$I per capita)                        | -         |

## Skin and Subcutaneous Diseases

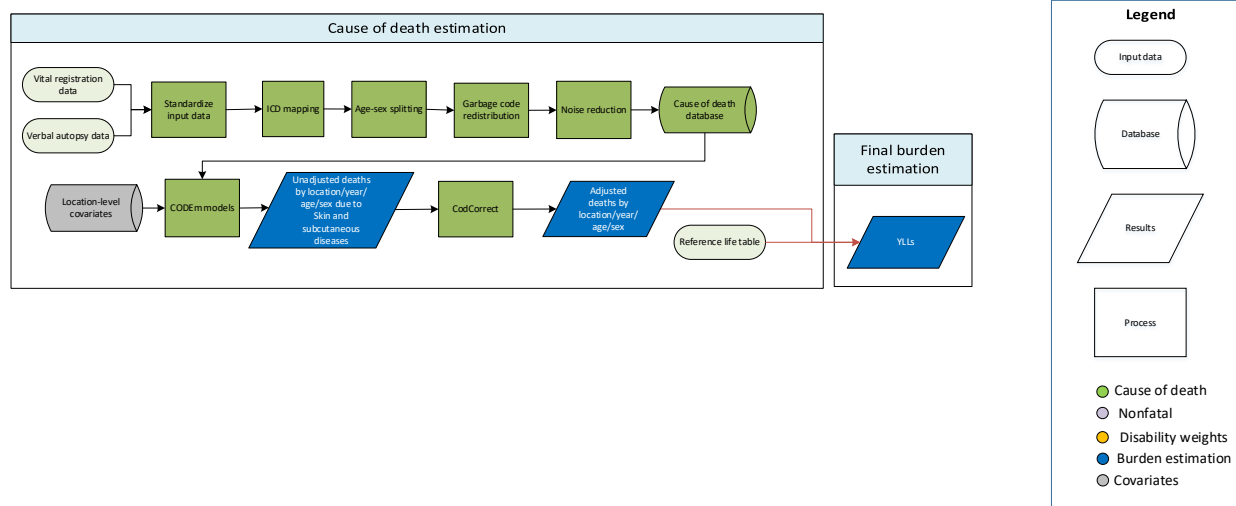

### Input data

Data used to estimate mortality of skin and subcutaneous diseases consisted of vital registration data and verbal autopsy data from the cause of death (COD) database. We marked data as outliers in instances where garbage code redistribution and noise reduction, in combination with small sample sizes, resulted in unreasonable cause fractions; and data that violated well-established time or age trends. The data in skin and subcutaneous diseases consists of aggregated data from all other specific skin diseases (cellulitis, pyoderma, decubitus ulcer) as well as unique data points from unspecified codes of skin and subcutaneous disease.

### Modelling strategy

We modelled deaths due to skin and subcutaneous diseases with a standard CODEm model using the cause of death database and location-level covariates as inputs. The model followed standard parameters, with the exception that the start age of the model was 28 days instead of 0. We hybridised separate global and data-rich models to acquire unadjusted results, which we finalised and adjusted using CoDCorrect to reach final years of life lost (YLLs) due to skin and subcutaneous diseases. In GBD 2017, we did not change covariates tried, or their expected strengths or directions, as compared to GBD 2016.

| Covariate                                      | Level | Direction |
|------------------------------------------------|-------|-----------|
| Alcohol (litres per capita)                    | 2     | 1         |
| Cumulative cigarettes (10 years)               | 2     | 1         |
| Cumulative cigarettes (5 years)                | 2     | 1         |
| Education (years per capita)                   | 3     | -1        |
| Lag distributed income (per capita)            | 3     | -1        |
| Smoking prevalence                             | 2     | 1         |
| Improved water source (proportion with access) | 1     | -1        |
| Unsafe sanitation (summary exposure variable)  | 1     | 1         |
| Socio-demographic Index                        | 3     | 0         |
| Healthcare access and quality index            | 2     | -1        |



## Bacterial Skin Diseases

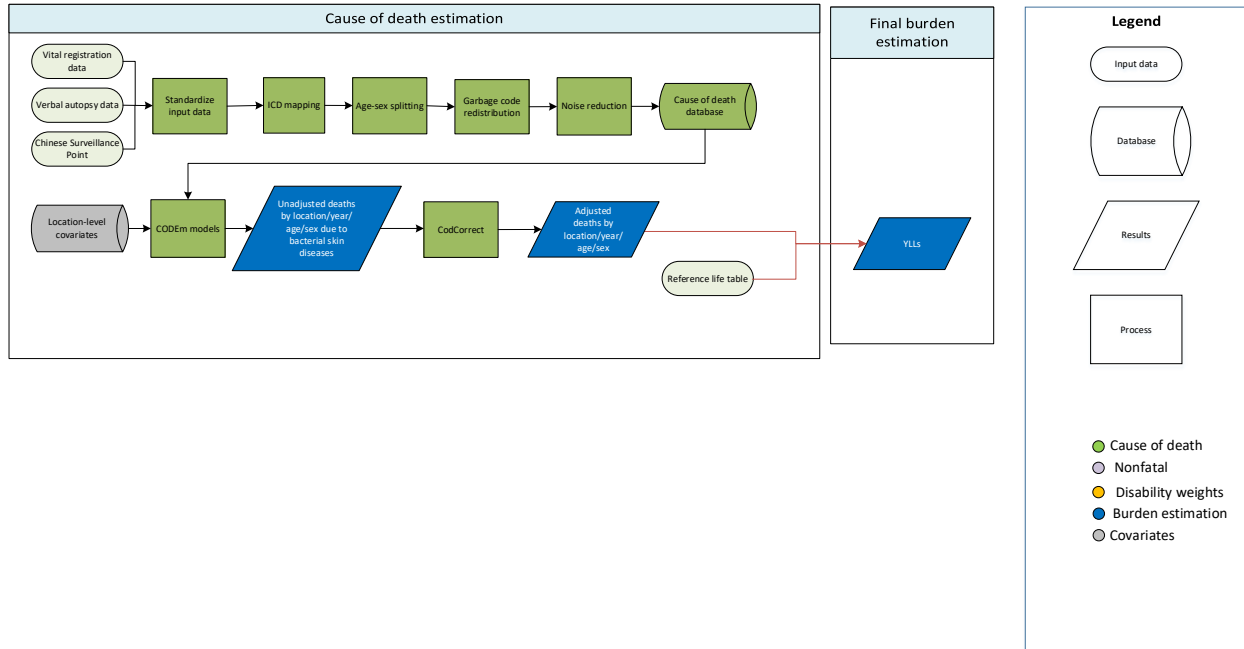

### Input Data

Data used to estimate bacterial diseases consisted of vital registration, verbal autopsy, and Chinese disease surveillance point (DSP) data from the cause of death (COD) database. Outlier criteria excluded data points that were implausibly high or low relative to global or regional patterns and data from countries with small populations.

### Modelling Strategy

This is a parent model of pyoderma and cellulitis. The standard CODEm modelling approach was used to estimate deaths due to bacterial skin diseases. CODEm parameters were a combination of those from pyoderma and cellulitis.

| Level | Covariate                                                    | Direction |
|-------|--------------------------------------------------------------|-----------|
| 1     | Summary exposure variable (SEV) scalar for unsafe sanitation | +         |
|       | Improved water source (proportion with access)               | -         |
| 2     | Alcohol (litres per capita)                                  | +         |
|       | Cumulative cigarettes (5 years)                              | +         |
|       | Cumulative cigarettes (10 years)                             | +         |
|       | Healthcare access and quality index                          | -         |
|       | Smoking prevalence                                           | +         |
| 3     | Education (years per capita)                                 | -         |
|       | Log LDI (I\$ per capita)                                     | -         |
|       | Socio-demographic Index                                      | 0         |

# Cellulitis

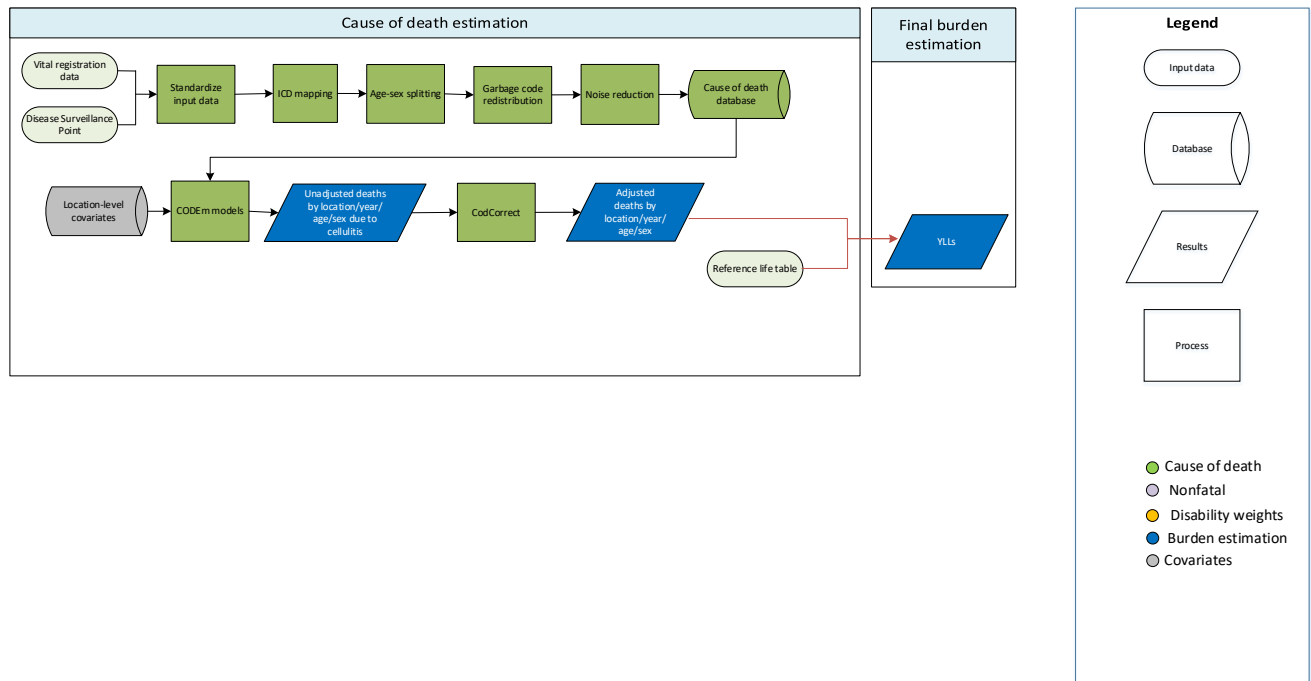

## Input data

Data used to estimate cellulitis mortality consisted of vital registration and Chinese disease surveillance point (DSP) data from the cause of death (COD) database. Outlier criteria excluded data points that were implausibly high or low relative to global or regional patterns and data from countries with small populations.

## Modelling strategy

The standard CODEm modelling approach was used to estimate deaths due to cellulitis. CODEm parameters were centrally defined. COD models were evaluated by comparing age-standardised death rates per 100,000 people to the GBD 2016 best model for 1990 and 2016 – individually for males and females. We also compared the age-standardised annualised rate of change for death rates per 100,000 persons to GBD 2016.

There were no significant changes in the modelling process between GBD 2016 and GBD 2017.

| Level | Covariate                           | Direction |
|-------|-------------------------------------|-----------|
| 2     | Healthcare access and quality index | -         |
| 3     | Education (years per capita)        | 0         |
|       | Log LDI (I\$ per capita)            | 0         |

# Pyoderma

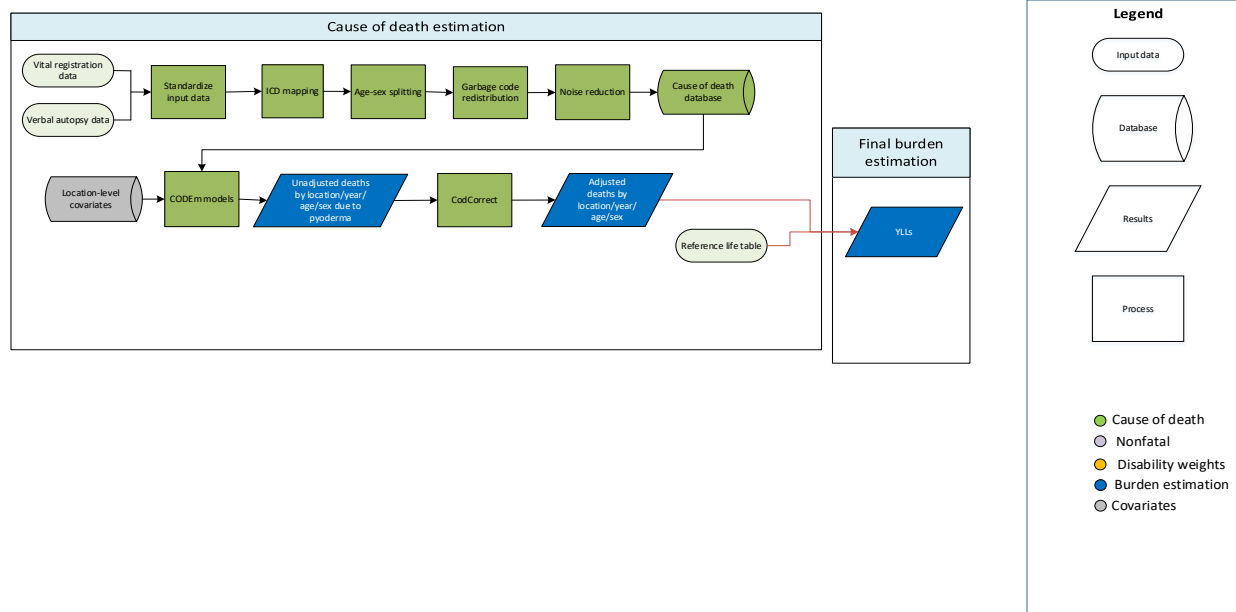

## Input data

Data used to estimate pyoderma mortality included centrally prepped vital registration and verbal autopsy data from the cause of death (COD) database. Outlier criteria excluded data points that were implausibly high or low relative to global or regional patterns and data from countries with small populations.

## Modelling strategy

We modelled deaths due to pyoderma with a standard CODEm model using the cause of death database and location-level covariates as inputs. The model followed standard parameters. We hybridised separate global and data-rich models to acquire unadjusted results, which we finalised and adjusted using CodCorrect to reach final years of life lost (YLLs) due to pyoderma. In GBD 2016 we added the healthcare access and quality (HAQ) index covariate to the model.

There were no significant changes in the modelling process between GBD 2016 and GBD 2017.

| Level | Covariate                                      | Direction |
|-------|------------------------------------------------|-----------|
| 1     | Improved water source (proportion with access) | -         |
|       | Unsafe sanitation (summary exposure variable)  | +         |
| 2     | Alcohol (litres per capita)                    | +         |
|       | Cumulative cigarettes (10 years)               | +         |
|       | Cumulative cigarettes (5 years)                | +         |
|       | Smoking prevalence                             | +         |
|       | Healthcare access and quality index            | -         |
| 3     | Lag distributed income (per capita)            | -         |
|       | Education (years per capita)                   | -         |
|       | Socio-demographic Index                        | 0         |

## Decubitus Ulcer

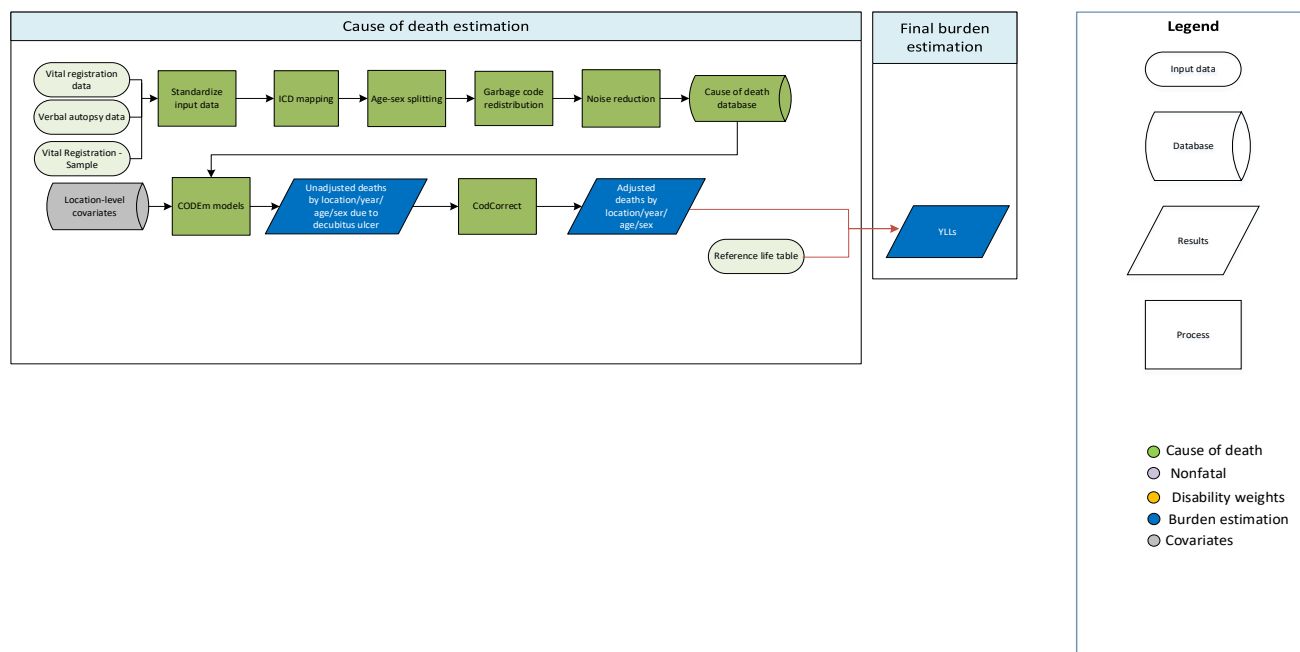

### Input data

Data used to estimate decubitus ulcer mortality consisted of vital registration sources and verbal autopsy sources from the cause of death (COD) database. Outlier criteria excluded data points that were implausibly high or low relative to global or regional patterns and data from countries with small populations.

### Modelling strategy

The standard CODEm modelling approach was used to estimate deaths due to decubitus ulcer. CODEm parameters were centrally defined. COD models were evaluated by comparing age-standardised death rates per 100,000 people to the GBD 2016 best model for 1990 and 2016 – individually for males and females. We also compared the age-standardised annualised rate of change for death rates per 100,000 persons to GBD 2016.

There were no significant changes in the modelling process between GBD 2016 and GBD 2017.

| Level | Covariate                                                    | Direction |
|-------|--------------------------------------------------------------|-----------|
| 1     | Summary exposure variable (SEV) scalar for unsafe sanitation | +         |
|       | Improved water source (proportion with access)               | -         |
| 2     | Alcohol (litres per capita)                                  | +         |
|       | Healthcare access and quality index                          | -         |
|       | Cumulative cigarettes (5 years)                              | +         |
|       | Cumulative cigarettes (10 years)                             | +         |
|       | Smoking prevalence                                           | +         |
| 3     | Education (years per capita)                                 | -         |
|       | Health system access 2                                       | -         |
|       | Log LDI (I\$ per capita)                                     | -         |

## Other Skin and Subcutaneous Diseases

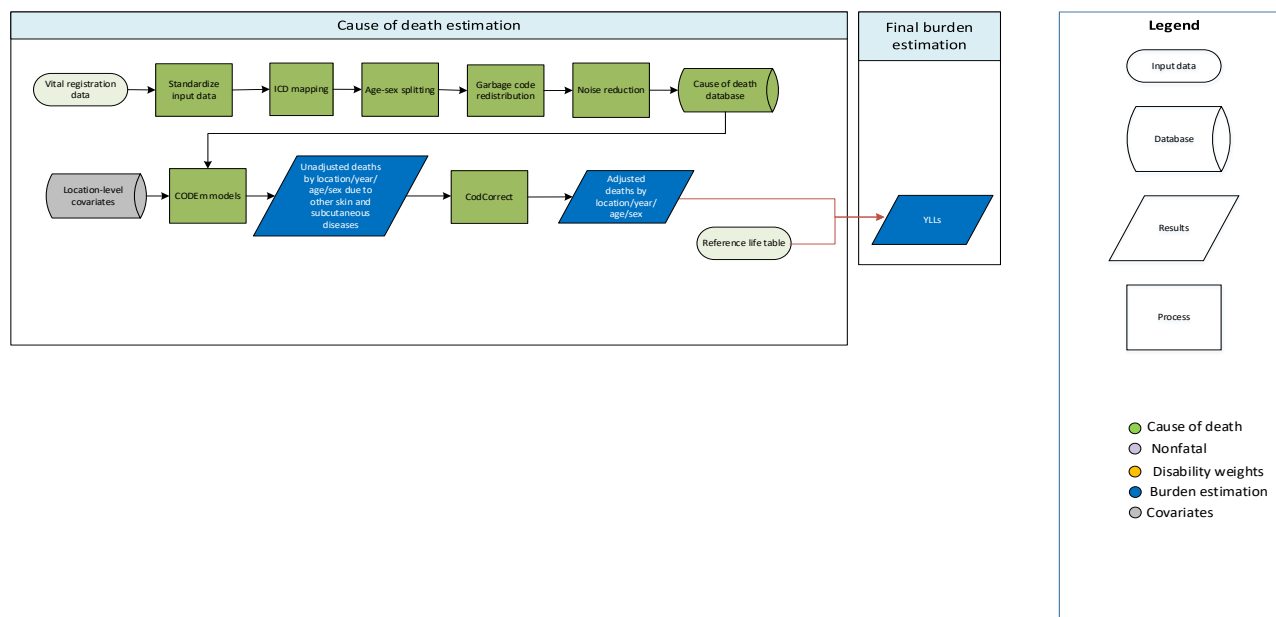

### Input data

Data used to estimate mortality due to other skin and subcutaneous diseases consisted of vital registration data from the cause of death (COD) database. We outliered data in instances where garbage code redistribution and noise reduction, in combination with small sample sizes, resulted in unreasonable cause fractions; and data that violated well-established time or age trends.

### Modelling strategy

The standard CODEm modelling approach was used to estimate deaths due to other skin and subcutaneous diseases. CODEm parameters were centrally defined. COD models were evaluated by comparing age-standardised death rates per 100,000 people to the GBD 2016 best model for 1990 and 2016 – individually for males and females. We also compared the age-standardised annualised rate of change for death rates per 100,000 people to GBD 2016.

There were no significant changes in the modelling process between GBD 2016 and GBD 2017.

| Level | Covariate                                                    | Direction |
|-------|--------------------------------------------------------------|-----------|
| 1     | Underweight (proportion <2SD weight for age, <5 years)       | +         |
|       | Improved water source (proportion with access)               | -         |
|       | Summary exposure variable (SEV) scalar for unsafe sanitation | +         |
| 2     | Healthcare access and quality index                          | -         |
|       | Smoking prevalence                                           | +         |
|       | Alcohol (litres per capita)                                  | +         |
|       | Cumulative cigarettes (5 years)                              | +         |
|       | Cumulative cigarettes (10 years)                             | +         |
| 3     | Education (years per capita)                                 | -         |
|       | Health system access 2                                       | -         |
|       | Log LDI (I\$ per capita)                                     | -         |
|       | Socio-demographic Index                                      | 0         |

## Musculoskeletal Disorders

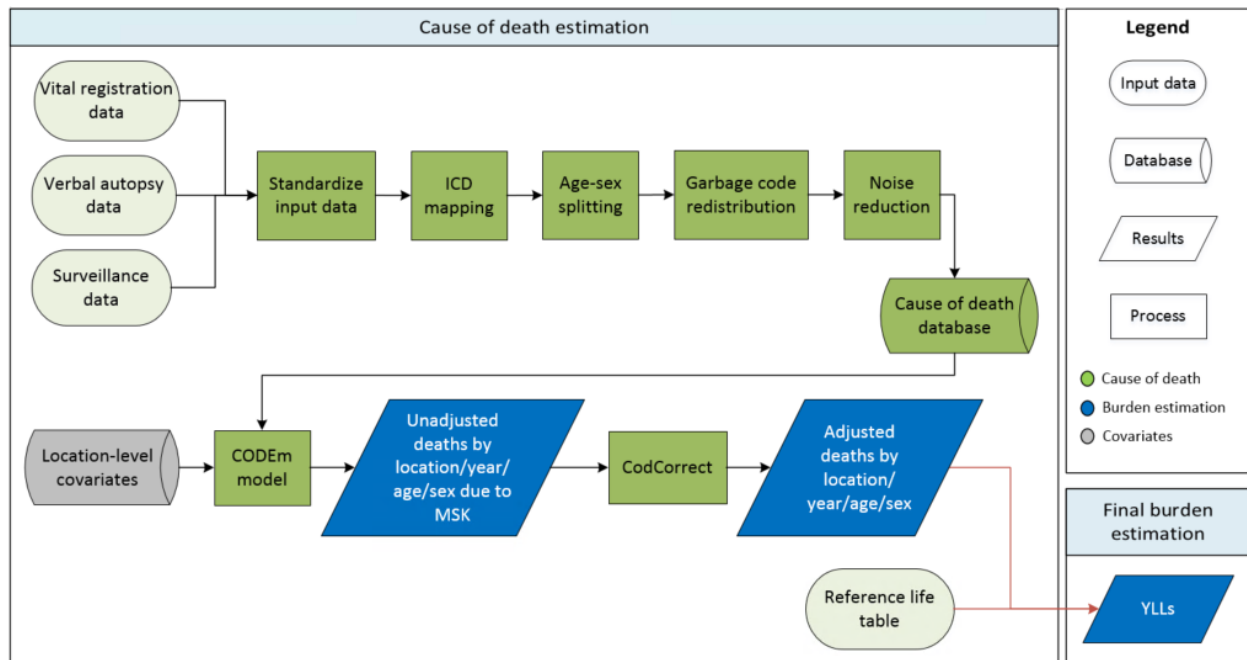

### Input data

Data used to estimate mortality from musculoskeletal disorders (MSK) included vital registration (VR), verbal autopsy (VA), and China disease surveillance point data from the cause of death (COD) database. Our outlier criteria excluded data points that were implausibly high or low relative to global or regional patterns, substantially conflicted with established age or temporal patterns, or significantly conflicted with other data sources based from the same locations or locations with similar characteristics (ie, Socio-demographic Index).

Based on these criteria, in GBD 2017 we excluded VA data from Bangladesh, Vietnam, South Africa, Burkina Faso, Ghana, and all countries in Eastern sub-Saharan Africa, including Ethiopia, Kenya, Tanzania, Mozambique, and Zambia, as VA tools have poor validity in identifying MSK deaths. In India, the number of deaths from new Sample Registration System (SRS) data in urban parts of states was substantially higher than the number of deaths from Medical Certification of Cause of Death (MCCD) data. In rural India, the SRS data are the only source. We have outliered the MCCD data to make the models follow the SRS data. This does lead to higher estimates in India compared to other parts of the world. For Indonesia, we excluded mortality surveillance data from a few states with high estimates based on small numbers, ie, Kalimantan Selatan and Kalimantan Timur in males, and Maluku in females. Recent years of data from Kazakhstan (2013–2015) were outliered as they presented a discontinuity with previous years, which has been ascribed to the country's attempt to reduce deaths due to CVD leading to an increase of deaths. ICD9-BTL data from Latin American countries (Ecuador, Costa Rica, El Salvador, Guatemala, Honduras, Nicaragua, Panama, Venezuela, Antigua and Barbuda, the Bahamas,

Barbados, Belize, Bermuda, Cuba, Dominica, Grenada, Guyana, Jamaica, Saint Lucia, Saint Vincent and Grenadines, Suriname, and Trinidad and Tobago) were outliered. The data from these countries provided in ICD9-detail or ICD10 were kept in the analysis.

## Modelling strategy

The standard CODEm modelling approach was applied to estimate deaths due to musculoskeletal disorders. We applied mostly the same covariates used in GBD 2016, with a few changes. Otherwise, there were no changes from the GBD 2016 modelling strategy.

Covariates are shown in the following table.

| Level                                 | Covariate                                                   | Direction |
|---------------------------------------|-------------------------------------------------------------|-----------|
| 1                                     | BMI (mean per capita)                                       | +         |
| 2                                     | Alcohol consumption (litres per capita)                     | +         |
|                                       | Cumulative cigarettes (10 years)                            | +         |
|                                       | Cumulative cigarettes (5 years)                             | +         |
|                                       | Smoking prevalence                                          | +         |
|                                       | Cholesterol (mean per capita)                               | +         |
|                                       | Vegetable consumption (g per capita)                        | 0         |
|                                       | Education (years per capita)                                | 0         |
|                                       | Log-transformed LDI: lag-distributed income (\$ per capita) | 0         |
|                                       | Healthcare access and quality index                         | -         |
|                                       | Bone mineral density                                        | +         |
| Age-standardised bone mineral density | +                                                           |           |
| 3                                     | SDI: Socio-demographic Index                                | 0         |

## Rheumatoid Arthritis

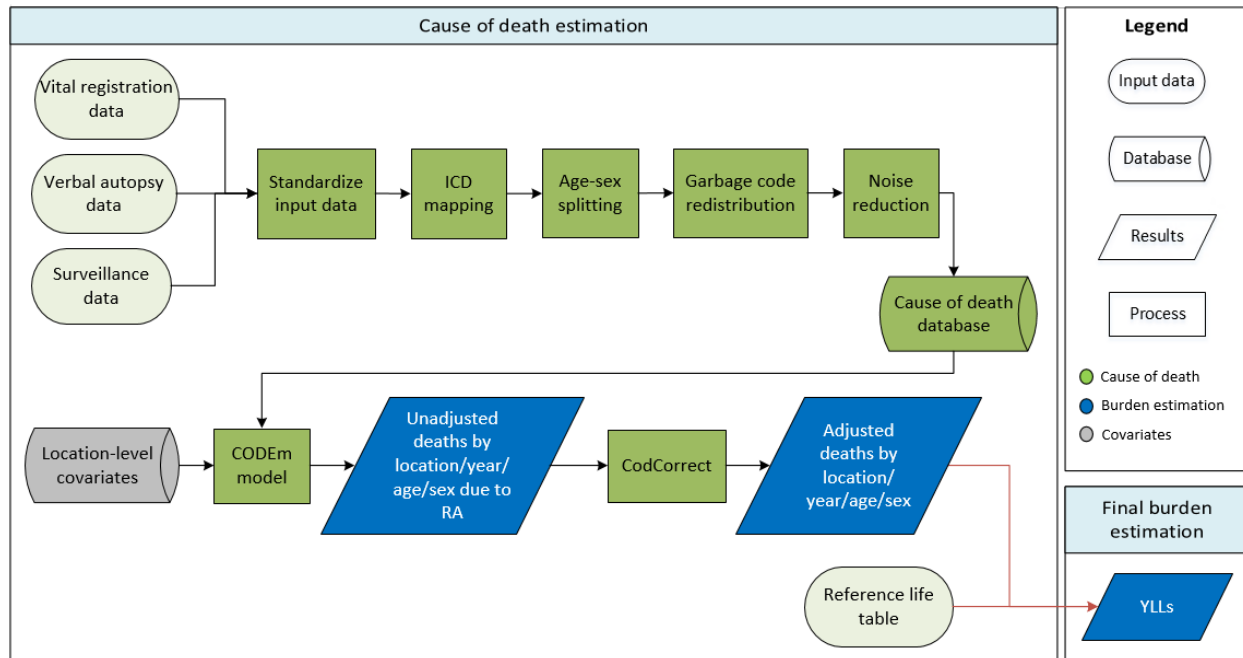

### Input data

Data used to estimate rheumatoid arthritis mortality included vital registration, verbal autopsy, and China disease surveillance data from the cause of death database. Our outlier criteria were to exclude data points that were (1) implausibly high or low relative to global or regional patterns, (2) substantially conflicted with established age or temporal patterns, or (3) significantly conflicted with other data sources based from the same locations or locations with similar characteristics (ie, Socio-demographic Index).

Based on these criteria, we excluded a few data points from China. For males, we outliered data points from all sources in Tibet and data points from China disease surveillance in 1991 in all states, as these led to disproportionately high estimates. For females, we outliered Tibet data points from all sources up to 2007 and China disease surveillance data points in several southern states, ie, Guangxi, Hainan, and Yunnan. In addition, as the vital registration data in Limpopo for both males and females in 2003 and before are implausibly higher than the other provinces in South Africa, we outliered this data source and kept the data for 2004–2014 in the analysis. Also, as the vital registration data of mid-age males in Greenland are unrealistically high and much higher than, eg, in Canada and Denmark, the data for males age 45 and above were outliered. Recent years of data from Kazakhstan (2013–2015) were outliered as they presented a discontinuity with previous years, which has been ascribed to the country's attempt to reduce deaths due to CVD leading to an increase of deaths from all other causes including rheumatoid arthritis. Lastly, we outliered ICD9-BTL data from Latin American countries (Ecuador, Costa Rica, El Salvador, Guatemala, Honduras, Nicaragua, Panama, Venezuela, Antigua and Barbuda, the Bahamas, Barbados, Belize, Bermuda, Cuba, Dominica, Grenada, Guyana, Jamaica, Saint Lucia, Saint Vincent and



Grenadines, Suriname, and Trinidad and Tobago). The data from these countries in the years that used ICD10 were kept in the analysis.

### Modelling strategy

The standard CODEm modelling approach was applied to estimate deaths due to rheumatoid arthritis. We mostly applied the same covariates used in GBD 2016, with a few changes. Otherwise, there were no changes from the GBD 2016 modelling strategy. All the covariates are shown in the following table.

| Level | Covariate                                                   | Direction |
|-------|-------------------------------------------------------------|-----------|
| 1     | Alcohol consumption (litres per capita)                     | +         |
|       | Cumulative cigarettes (10 years)                            | +         |
|       | Cumulative cigarettes (5 years)                             | +         |
|       | Smoking prevalence                                          | +         |
|       | Healthcare access and quality index                         | -         |
| 2     | Cholesterol (mean per capita)                               | +         |
|       | Vegetable consumption (g per capita)                        | 0         |
| 3     | BMI (mean per capita)                                       | +         |
|       | SDI: Socio-demographic Index                                | 0         |
|       | Log-transformed LDI: lag-distributed income (\$ per capita) | -         |
|       | Education (years per capita)                                | -         |
|       | Milk (g), adjusted                                          | 0         |

## Other Musculoskeletal Disorders

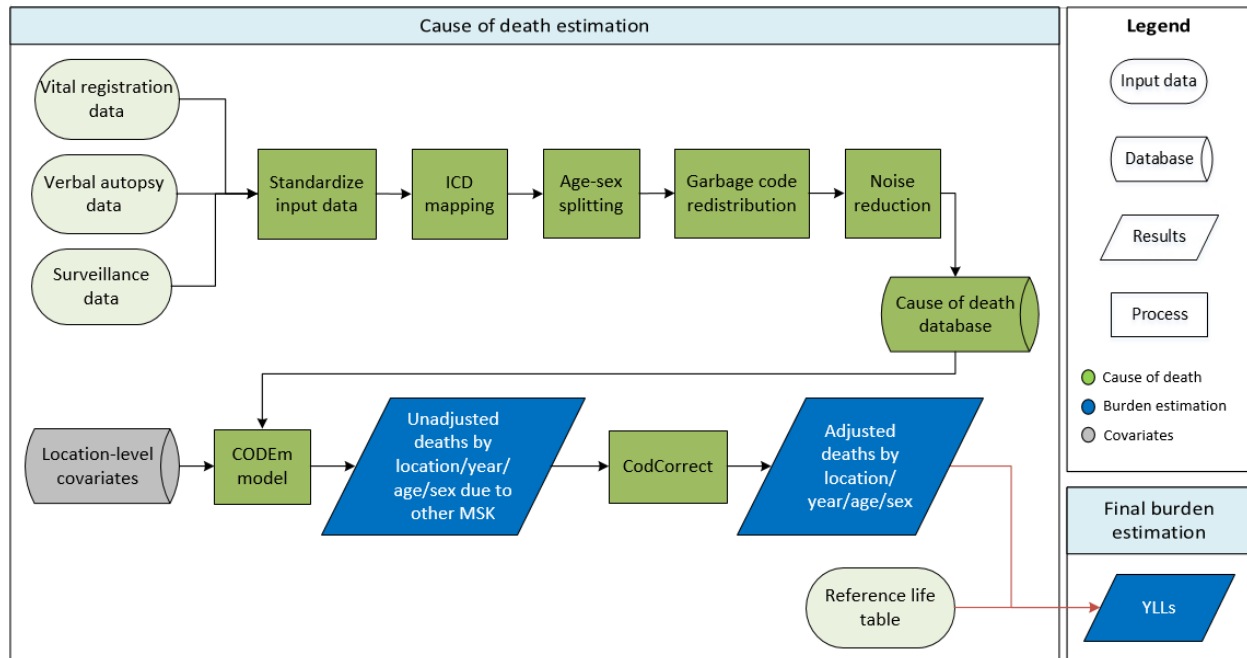

### Input data

Data used to estimate mortality of other musculoskeletal disorders (MSK) included vital registration, verbal autopsy (VA), and China disease surveillance point data from the cause of death database. Our outlier criteria excluded data points that were implausibly high or low relative to global or regional patterns, substantially conflicted with established age or temporal patterns, or significantly conflicted with other data sources based from the same locations or locations with similar characteristics (ie, socio-demographic index).

Based on these criteria, we excluded VA studies from Eastern and Western sub-Saharan Africa, as VA studies cannot distinguish other MSK deaths and estimates for the regions were disproportionately high. Recent years of data from Kazakhstan (2013–2015) were outliered as they presented a discontinuity with previous years, which has been ascribed to the country’s attempt to reduce deaths from CVD leading to an increase of deaths from all other causes, including other MSK. We also outliered all data in Latin American countries (Ecuador, Costa Rica, El Salvador, Guatemala, Honduras, Nicaragua, Panama, Venezuela, Antigua and Barbuda, the Bahamas, Barbados, Belize, Bermuda, Cuba, Dominica, Grenada, Guyana, Jamaica, Saint Lucia, Saint Vincent and Grenadines, Suriname, and Trinidad and Tobago). The data from these countries in the years that used ICD9-detail or ICD10 were kept in the analysis.

### Modelling strategy

The standard CODEm modelling approach was applied to estimate deaths due to other musculoskeletal disorders. We applied the same covariates used in GBD 2016 and there were no major changes from the GBD 2016 modelling strategy. Covariates are shown in the following table.

| Level | Covariate | Direction |
|-------|-----------|-----------|
|-------|-----------|-----------|

|   |                                                             |   |
|---|-------------------------------------------------------------|---|
| 1 | BMI (mean per capita)                                       | + |
| 2 | Alcohol consumption (litres per capita)                     | + |
|   | Cumulative cigarettes (10 years)                            | + |
|   | Cumulative cigarettes (5 years)                             | + |
|   | Smoking prevalence                                          | + |
|   | Cholesterol (mean per capita)                               | + |
|   | Vegetable consumption (g per capita)                        | 0 |
|   | Education (years per capita)                                | 0 |
|   | Log-transformed LDI: lag-distributed income (\$ per capita) | 0 |
|   | Healthcare access and quality index                         | - |
| 3 | SDI: Socio-demographic Index                                | 0 |

**Congenital Birth Defects:** *Neural tube defects, congenital heart anomalies, orofacial clefts, Down syndrome, Turner syndrome, Klinefelter syndrome, other chromosomal disorders, congenital musculoskeletal anomalies, urogenital congenital anomalies, digestive congenital anomalies, and other congenital birth defects.*

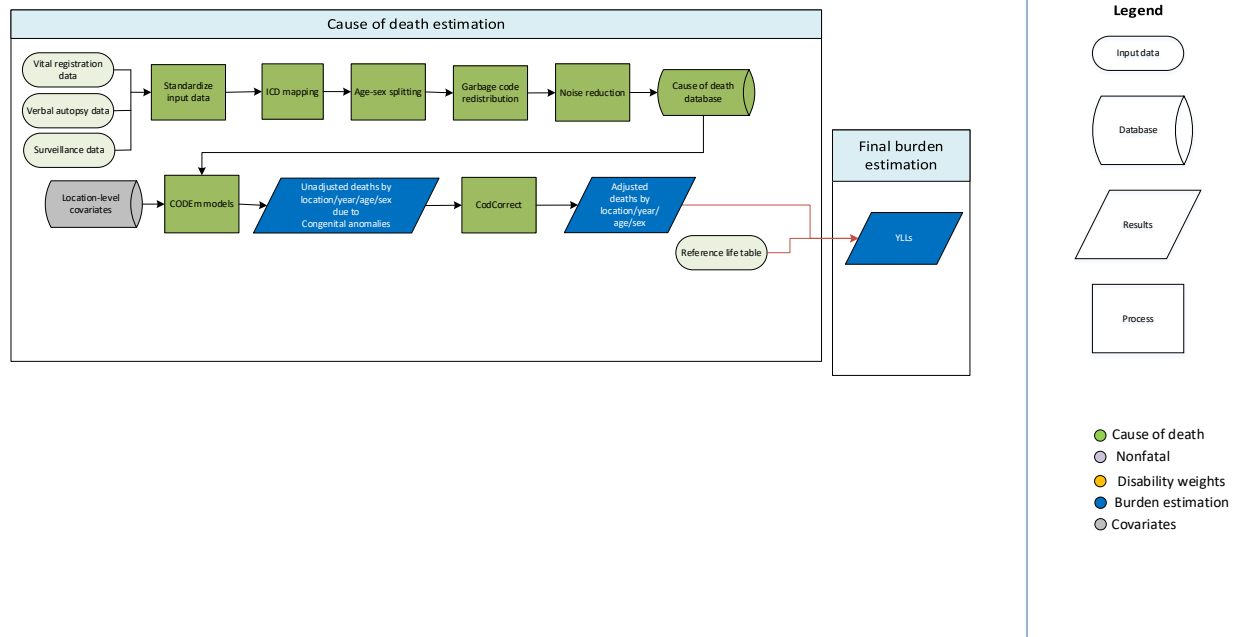

## Input data

For GBD 2017, input data for estimating mortality due to congenital anomalies was centrally extracted, processed, and stored in the causes of death (CoD) database. Vital registration (VR) was the dominant data type, followed by verbal autopsy (VA) and surveillance. Those CoD data sources that specified the sub-cause of birth defect were included in estimation of both the parent congenital anomalies model as well as in sub-type-specific models.

For GBD 2017, data exclusions were limited. The majority of VA data were outliered in those over 5 years old as the age patterns were unreliable and led to poor model performance in the under-5 age groups. We also excluded some data sources from the parent model where only a subset of sub-causes were specified (eg, congenital heart disease, neural tube defects, and other congenital anomalies) and the sum of the sub-causes clearly represented systematic underreporting of one of the sub-causes. Systematic underreporting was suspected when sex- and age-specific rates were more than an order of magnitude lower than neighboring or comparable locations. Data sources for those locations were still included by default for sub-cause-specific models because under-reporting of the total was not assumed to necessarily be associated with under-reporting of all of the component conditions.

## Modelling strategy

All types of congenital anomalies were estimated using cause of death ensemble modeling (CODEm) for GBD 2017, as was done for previous iterations of the GBD study. Specific causes included neural tube defects, congenital heart anomalies, orofacial clefts, Down syndrome, other chromosomal anomalies, congenital musculoskeletal anomalies, urogenital congenital anomalies, digestive congenital anomalies, and other congenital birth defects. We assumed no mortality from either Klinefelter syndrome or Turner syndrome, for which we model non-fatal outcomes only. For GBD 2017, we modelled congenital anomalies as a cause of death for ages 0-69 years only, assuming that all mortality from congenital conditions occurs before age 70 years of age.

For GBD 2016, we added three new causes to the congenital anomalies: congenital musculoskeletal and limb anomalies; urogenital congenital anomalies; and digestive congenital anomalies. We made no additions to the causes of congenital anomalies for GBD 2017.

## Covariates selected for CODEm model of overall congenital birth defects

| Covariate                                                  | Transformation | Level | Direction     |
|------------------------------------------------------------|----------------|-------|---------------|
| Maternal alcohol consumption during pregnancy (proportion) | None           | 1     | Positive      |
| In-facility delivery (proportion)                          | None           | 1     | Negative      |
| Live births 35+ (proportion)                               | None           | 1     | Positive      |
| Folic acid unadjusted (ug)                                 | None           | 1     | Negative      |
| Legality of abortion                                       | None           | 2     | Negative      |
| Antenatal care (1 visit) coverage (proportion)             | None           | 2     | Not specified |
| Smoking prevalence (reproductive-age-standardised)         | None           | 2     | Positive      |
| Antenatal care (4 visits) coverage (proportion)            | None           | 2     | Negative      |
| Healthcare access and quality index                        | None           | 2     | Negative      |
| Education (years per capita)                               | None           | 2     | Negative      |
| Alcohol (litres per capita)                                | None           | 3     | Positive      |
| Fruits unadjusted (g)                                      | None           | 3     | Positive      |
| Outdoor air pollution (PM <sub>2.5</sub> )                 | None           | 3     | Positive      |
| Indoor air pollution (all cooking fuels)                   | None           | 3     | Positive      |
| Socio-demographic Index                                    | None           | 3     | Negative      |
| Vegetables unadjusted (g)                                  | None           | 3     | Positive      |

## Covariates selected for CODEm model of neural tube defects

| Covariate                           | Transformation | Level | Direction |
|-------------------------------------|----------------|-------|-----------|
| Health system access (capped)       | None           | 1     | Negative  |
| Fruits adjusted (g)                 | None           | 2     | Negative  |
| Vegetables adjusted (g)             | None           | 2     | Negative  |
| Healthcare access and quality index | None           | 2     | Negative  |

|                              |      |   |          |
|------------------------------|------|---|----------|
| Education (years per capita) | None | 3 | Negative |
| LDI (I\$ per capita)         | Log  | 3 | Negative |
| Socio-demographic Index      | None | 3 | Negative |

#### Covariates selected for CODEm model of congenital heart anomalies

| Covariate                                                  | Transformation | Level | Direction |
|------------------------------------------------------------|----------------|-------|-----------|
| Maternal alcohol consumption during pregnancy (proportion) | None           | 1     | Positive  |
| Socio-demographic Index                                    | Log            | 2     | Negative  |
| Smoking prevalence (reproductive-age-standardised)         | None           | 2     | Positive  |
| Diabetes age-standardised prevalence (proportion)          | None           | 2     | Positive  |
| Healthcare access and quality index                        | None           | 2     | Negative  |
| Legality of abortion                                       | None           | 2     | Negative  |
| Antenatal care (1 visit) coverage (proportion)             | None           | 2     | Negative  |
| In-facility delivery (proportion)                          | None           | 2     | Negative  |
| Education (years per capita)                               | None           | 2     | Negative  |
| Alcohol (litres per capita)                                | None           | 3     | Positive  |
| Antenatal care (4 visits) coverage (proportion)            | None           | 3     | Negative  |
| Skilled birth attendance (proportion)                      | None           | 3     | Negative  |
| Live births 35+ (proportion)                               | None           | 3     | Positive  |

#### Covariates selected for CODEm model of cleft lip and cleft palate

| Covariate                                                  | Transformation | Level | Direction     |
|------------------------------------------------------------|----------------|-------|---------------|
| Indoor air pollution (all cooking fuels)                   | None           | 1     | Positive      |
| Diabetes age-standardised prevalence (proportion)          | None           | 2     | Positive      |
| Maternal alcohol consumption during pregnancy (proportion) | None           | 2     | Positive      |
| Healthcare access and quality index                        | None           | 2     | Negative      |
| Outdoor air pollution (PM <sub>2.5</sub> )                 | None           | 2     | Positive      |
| Legality of abortion                                       | None           | 2     | Negative      |
| Skilled birth attendance (proportion)                      | None           | 2     | Negative      |
| Smoking prevalence (reproductive-age-standardised)         | None           | 2     | Positive      |
| Vegetables unadjusted (g)                                  | None           | 3     | Not specified |
| Alcohol (litres per capita)                                | None           | 3     | Positive      |
| Antenatal care (4 visits) coverage (proportion)            | None           | 3     | Negative      |
| Education (years per capita)                               | None           | 3     | Negative      |
| Fruits unadjusted (g)                                      | None           | 3     | Not specified |
| Antenatal care (1 visit) coverage (proportion)             | None           | 3     | Negative      |

### Covariates selected for CODEm model of Down syndrome

| Covariate                                                  | Transformation | Level | Direction |
|------------------------------------------------------------|----------------|-------|-----------|
| Live births 35+ (proportion)                               | None           | 1     | Positive  |
| Legality of abortion                                       | None           | 1     | Negative  |
| Live births 40+ (proportion)                               | None           | 1     | Positive  |
| Socio-demographic Index                                    | None           | 2     | Negative  |
| LDI (I\$ per capita)                                       | Log            | 2     | Negative  |
| In-facility delivery (proportion)                          | None           | 2     | Negative  |
| Healthcare access and quality index                        | None           | 2     | Negative  |
| Maternal alcohol consumption during pregnancy (proportion) | None           | 3     | Positive  |
| Antenatal care (1 visit) coverage (proportion)             | None           | 3     | Negative  |
| Education (years per capita)                               | None           | 3     | Negative  |
| Indoor air pollution (all cooking fuels)                   | None           | 3     | Positive  |
| Antenatal care (4 visits) coverage (proportion)            | None           | 3     | Negative  |
| Vegetables unadjusted (g)                                  | None           | 3     | Negative  |
| Smoking prevalence (reproductive age-standardised)         | None           | 3     | Positive  |

### Covariates selected for CODEm model of other chromosomal abnormalities

| Covariate                                                  | Transformation | Level | Direction     |
|------------------------------------------------------------|----------------|-------|---------------|
| Live births 35+ (proportion)                               | None           | 1     | Positive      |
| Live births 40+ (proportion)                               | None           | 1     | Positive      |
| Legality of abortion                                       | None           | 1     | Negative      |
| LDI (I\$ per capita)                                       | Log            | 2     | Negative      |
| Healthcare access and quality index                        | None           | 2     | Negative      |
| Antenatal care (4 visits) coverage (proportion)            | None           | 2     | Negative      |
| Antenatal care (1 visit) coverage (proportion)             | None           | 2     | Negative      |
| In-facility delivery (proportion)                          | None           | 2     | Negative      |
| Maternal alcohol consumption during pregnancy (proportion) | None           | 2     | Positive      |
| Socio-demographic Index                                    | None           | 3     | Not specified |
| Alcohol (litres per capita)                                | None           | 3     | Positive      |
| Smoking prevalence (reproductive age-standardised)         | None           | 3     | Positive      |
| Education (years per capita)                               | None           | 3     | Negative      |
| Skilled birth attendance (proportion)                      | None           | 3     | Negative      |

### Covariates selected for CODEm model of congenital musculoskeletal and limb anomalies

| Covariate                                                  | Transformation | Level | Direction |
|------------------------------------------------------------|----------------|-------|-----------|
| Maternal alcohol consumption during pregnancy (proportion) | None           | 1     | Positive  |
| Legality of abortion                                       | None           | 1     | Negative  |
| In-facility delivery (proportion)                          | None           | 2     | Negative  |
| Diabetes age-standardised prevalence (proportion)          | None           | 2     | Positive  |

|                                                    |      |   |               |
|----------------------------------------------------|------|---|---------------|
| Socio-demographic Index                            | None | 2 | Negative      |
| Healthcare access and quality index                | None | 2 | Negative      |
| Indoor air pollution (all cooking fuels)           | None | 2 | Positive      |
| Smoking prevalence (reproductive age standardised) | None | 2 | Positive      |
| Antenatal care (4 visits) coverage (proportion)    | None | 3 | Negative      |
| Alcohol (litres per capita)                        | None | 3 | Positive      |
| Vegetables unadjusted (g)                          | None | 3 | Not specified |
| Fruits unadjusted (g)                              | None | 3 | Not specified |
| Education (years per capita)                       | None | 3 | Negative      |
| Antenatal care (1 visit) coverage (proportion)     | None | 3 | Negative      |

#### Covariates selected for CODEm model of urogenital congenital anomalies

| Covariate                                                  | Transformation | Level | Direction |
|------------------------------------------------------------|----------------|-------|-----------|
| Smoking prevalence (reproductive age-standardised)         | None           | 1     | Positive  |
| Maternal alcohol consumption during pregnancy (proportion) | None           | 1     | Positive  |
| Healthcare access and quality index                        | None           | 2     | Negative  |
| Diabetes age-standardised prevalence (proportion)          | None           | 2     | Positive  |
| Socio-demographic Index                                    | None           | 2     | Negative  |
| Outdoor air pollution (PM <sub>2.5</sub> )                 | None           | 2     | Positive  |
| In-facility delivery (proportion)                          | None           | 2     | Negative  |
| Indoor air pollution (all cooking fuels)                   | None           | 2     | Positive  |
| Antenatal care (1 visit) coverage (proportion)             | None           | 3     | Negative  |
| Alcohol (litres per capita)                                | None           | 3     | Positive  |
| Education (years per capita)                               | None           | 3     | Negative  |
| LDI (I\$ per capita)                                       | Log            | 3     | Negative  |
| Antenatal care (4 visits) coverage (proportion)            | None           | 3     | Negative  |

#### Covariates selected for CODEm model of digestive congenital anomalies

| Covariate                                                  | Transformation | Level | Direction     |
|------------------------------------------------------------|----------------|-------|---------------|
| Maternal alcohol consumption during pregnancy (proportion) | None           | 1     | Positive      |
| Smoking prevalence (reproductive age-standardised)         | None           | 1     | Positive      |
| Indoor air pollution (all cooking fuels)                   | None           | 2     | Positive      |
| Diabetes age-standardised prevalence (proportion)          | None           | 2     | Positive      |
| Socio-demographic Index                                    | None           | 2     | Negative      |
| Prevalence of obesity (age-standardised)                   | None           | 2     | Positive      |
| In-facility delivery (proportion)                          | None           | 2     | Negative      |
| Healthcare access and quality index                        | None           | 2     | Negative      |
| Alcohol (liters per capita)                                | None           | 3     | Positive      |
| Health system access (capped)                              | None           | 3     | Negative      |
| Education (years per capita)                               | None           | 3     | Negative      |
| Vegetables unadjusted (g)                                  | None           | 3     | Not specified |
| Antenatal care (1 visit) coverage (proportion)             | None           | 3     | Negative      |
| Antenatal care (4 visits) coverage (proportion)            | None           | 3     | Negative      |



|                       |      |   |               |
|-----------------------|------|---|---------------|
| Fruits unadjusted (g) | None | 3 | Not specified |
| LDI (I\$ per capita)  | Log  | 3 | Negative      |

#### Covariates selected for CODEm model of other congenital birth defects

| Covariate                                                  | Transformation | Level | Direction |
|------------------------------------------------------------|----------------|-------|-----------|
| Maternal alcohol consumption during pregnancy (proportion) | None           | 1     | Positive  |
| Live births 35+ (proportion)                               | None           | 1     | Positive  |
| Education (years per capita)                               | None           | 2     | Negative  |
| Smoking prevalence (reproductive age-standardised)         | None           | 2     | Positive  |
| Legality of abortion                                       | None           | 2     | Negative  |
| In-facility delivery (proportion)                          | None           | 2     | Negative  |
| Indoor air pollution (all cooking fuels)                   | None           | 2     | Positive  |
| Healthcare access and quality index                        | None           | 2     | Negative  |
| Antenatal care (1 visit) coverage (proportion)             | None           | 3     | Negative  |
| Diabetes age-standardised prevalence (proportion)          | None           | 3     | Positive  |
| LDI (I\$ per capita)                                       | Log            | 3     | Negative  |
| Socio-demographic Index                                    | None           | 3     | Negative  |
| Antenatal care (4 visits) coverage (proportion)            | None           | 3     | Negative  |
| Alcohol (litres per capita)                                | None           | 3     | Positive  |

## Urinary Diseases and Male Infertility

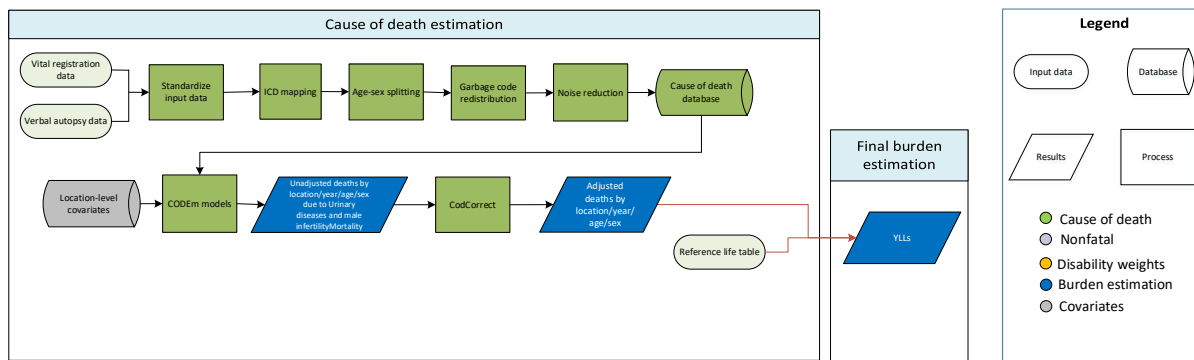

### Input data

Vital registration data were used to model mortality due to urinary diseases and male infertility. Vital registration data were standardised and mapped according to the GBD causes of death ICD mapping method. These data were then age-sex split, and appropriate redistribution of garbage code data was performed. After applying noise reduction, these data were uploaded to the COD database. Outliers were identified by systematic examination of data points for all location-years. Data points that violated well-established age or time trends or that resulted in extremely high or low cause fractions were determined to be outliers.

### Modelling strategy

The estimation strategy used for fatal urinary diseases and male infertility is largely similar to methods used in GBD 2016. A standard CODEm model with location-level covariates was used to model deaths due to urinary diseases and male infertility. Iterations of models were assessed at the location/year/age group/sex level to determine whether data points merited exclusion via outliering. The estimates are limited by a paucity of data for regions such as Eastern and Central sub-Saharan Africa. The results of this disease differ by gender as no “male infertility” estimates were performed among women. The covariates used are displayed below.

| Level | Covariate                           | Direction |
|-------|-------------------------------------|-----------|
| 2     | Mean BMI                            | +         |
|       | Healthcare access and quality index | -         |
|       | Latitude under 15 (proportion)      | 0         |
|       | Latitude 15 to 30 (proportion)      | 0         |
|       | Latitude 30 to 45 (proportion)      | 0         |
|       | Latitude over 45 (proportion)       | 0         |
| 3     | Education (years per capita)        | -         |
|       | Log LDI (\$! per capita)            | -         |
|       | Socio-demographic Index             | 0         |

## Urinary Tract Infections

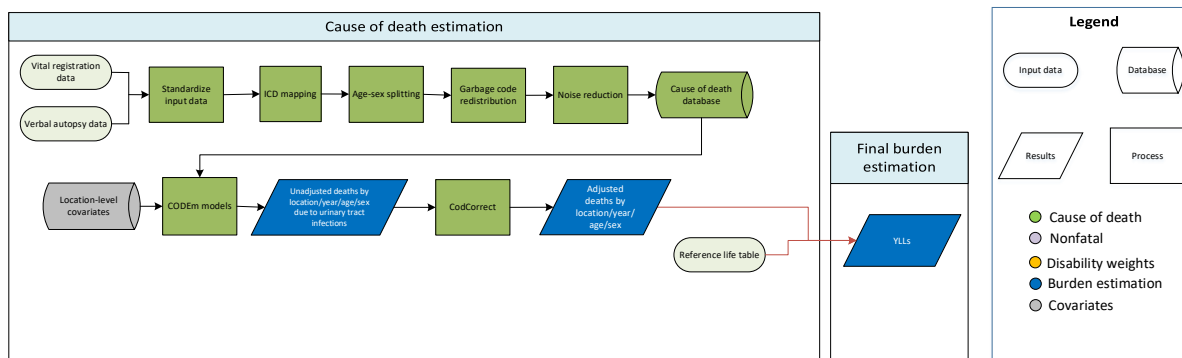

### Input data

Vital registration and verbal autopsy data were used to model mortality due to urinary tract infections. Data were standardised and mapped according to the GBD causes of death ICD mapping method. These data were then age-sex split, and appropriate redistribution of garbage code data was performed. After applying noise reduction, these data were uploaded to the COD database. Outliers were identified by systematic examination of data points for all location-years. Data points that violated well-established age or time trends or that resulted in extremely high or low cause fractions were determined to be outliers.

### Modelling strategy

The estimation strategy used for fatal urinary tract infections is largely similar to methods used in GBD 2016. A standard CODEm model with location-level covariates was used to model deaths due to interstitial nephritis. Age-restrictions for death estimations secondary to urinary tract infections include 0 days for lower bound, 95+ for upper bound. Iterations of models were assessed at the location/year/age group/sex level to determine whether data points merited exclusion via outliering. Unadjusted death estimates were adjusted using CoDCorrect to produce final estimates of YLLs. The estimates are limited by a paucity of data for regions such as Eastern and Central sub-Saharan Africa. The covariates used are displayed below.

| Level | Covariate                           | Direction |
|-------|-------------------------------------|-----------|
| 1     | Sanitation (proportion with access) | –         |
| 2     | Education (years per capita)        | –         |
|       | Log LDI (\$I per capita)            | –         |
|       | Healthcare access and quality index | –         |
| 3     | Socio-demographic Index             | n/a       |

## Urolithiasis

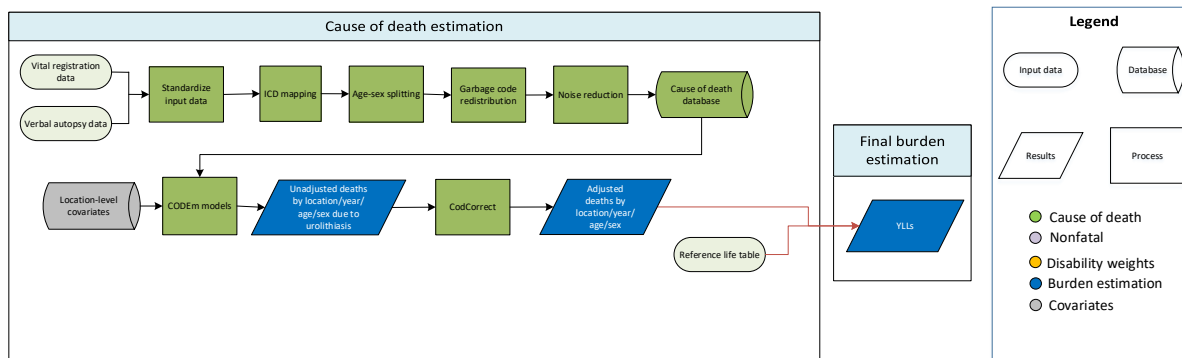

### Input data

Vital registration and verbal autopsy data were used to model mortality due to urolithiasis. Data were standardised and mapped according to the GBD causes of death ICD mapping method. These data were then age-sex split, and appropriate redistribution of garbage code data was performed. After applying noise reduction, these data were uploaded to the COD database. Outliers were identified by systematic examination of data points for all location-years. Data points that violated well-established age or time trends or that resulted in extremely high or low cause fractions were determined to be outliers.

### Modelling strategy

The estimation strategy used for fatal urolithiasis is largely similar to methods used in GBD 2016. A standard CODEm model including location-level covariates was used to model deaths due to urolithiasis. Age-restrictions for death estimations secondary to urolithiasis include 5 years for lower bound, 95+ for upper bound. Iterations of models were assessed at the location/year/age group/sex level to determine whether data points merited exclusion via outliering. Unadjusted death estimates were adjusted using CoDCorrect to produce final estimates of YLLs. The estimates are limited by a paucity of data for regions such as Eastern and Central sub-Saharan Africa. The covariates used are displayed below.

| Level | Covariate                                 | Direction |
|-------|-------------------------------------------|-----------|
| 1     | Temperature (90 <sup>th</sup> percentile) | +         |
| 2     | Animal fat (kcal per capita)              | +         |
|       | Fruits (kcal per capita)                  | -         |
|       | Vegetables (kcal per capita)              | -         |
|       | Red meat (kcal per capita)                | +         |
|       | Healthcare access and quality index       | -         |
| 3     | Socio-demographic Index                   | 0         |
|       | Log LDI (\$I per capita)                  | -         |

## Other Urinary Diseases

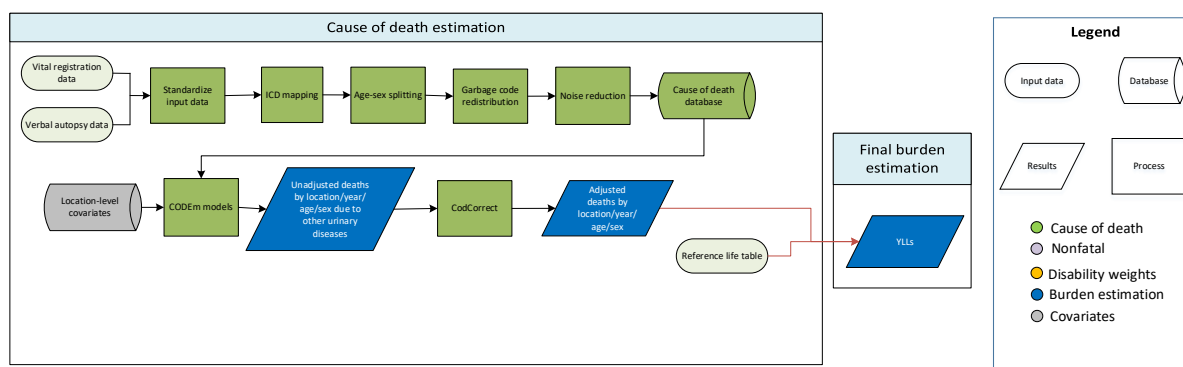

### Input data

Vital registration and verbal autopsy data were used to model mortality due to other urinary diseases. Data were standardised and mapped according to the GBD causes of death ICD mapping method. These data were then age-sex split, and appropriate redistribution of garbage code data was performed. After applying noise reduction, these data were uploaded to the COD database. Outliers were identified by systematic examination of data points for all location-years. Data points that violated well-established age or time trends or that resulted in extremely high or low cause fractions were determined to be outliers.

### Modelling strategy

The estimation strategy used for other urinary diseases is largely similar to methods used in GBD 2016. A standard CODEm model with location-level covariates was used to model deaths due to other urinary diseases. Age-restrictions for death estimations secondary to urinary diseases and male infertility include 0 days for lower bound, 95+ for upper bound. Iterations of models were assessed at the location/year/age group/sex level to determine whether data points merited exclusion via outliering. Unadjusted death estimates were adjusted using CoDCorrect to produce final estimates of YLLs. The estimates are limited by a paucity of data for regions such as Eastern and Central sub-Saharan Africa. The covariates used are displayed below.

| Level | Covariate                           | Direction |
|-------|-------------------------------------|-----------|
| 1     | Mean BMI                            | +         |
| 2     | Education (years per capita)        | -         |
|       | Log LDI (\$I per capita)            | -         |
|       | Healthcare access and quality index | -         |
| 3     | Socio-demographic Index             | 0         |

## Gynaecological Conditions

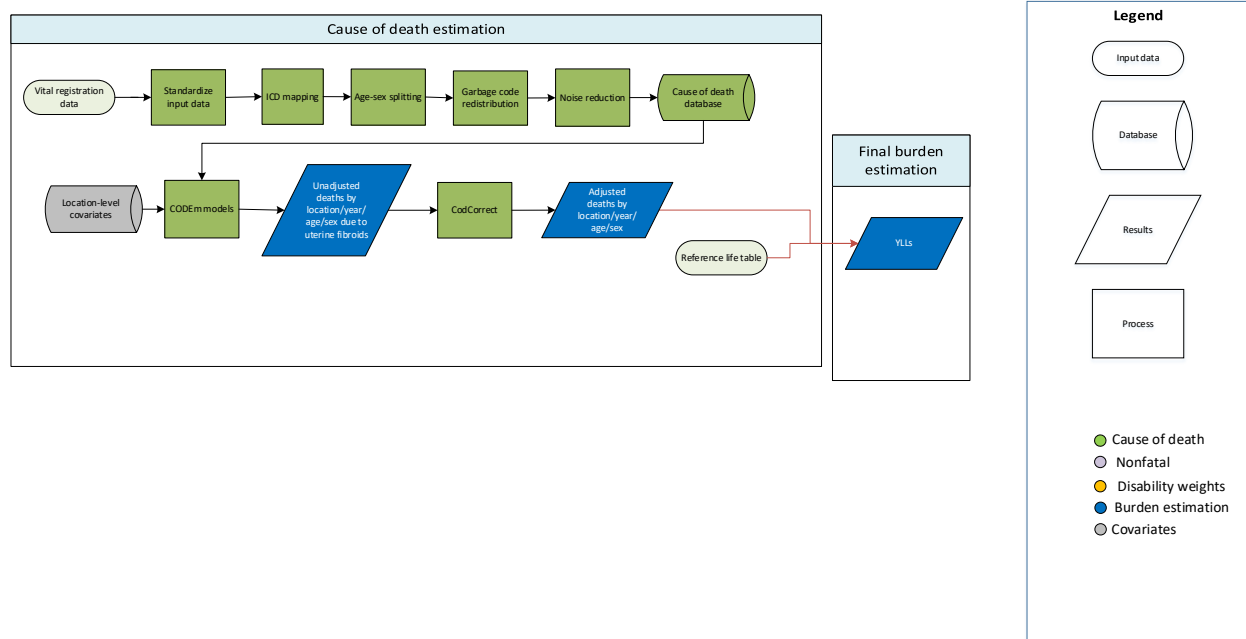

### Input data

For GBD 2017, vital registration data were used to estimate deaths for each of the five fatal gynaecological conditions, which include uterine fibroids, polycystic ovarian syndrome (PCOS), endometriosis, genital prolapse, and other gynaecological conditions. These causes are sex-specific to women and we only model deaths among women. ICD9 and ICD10 codes for each are listed below. Data points were selected as outliers if they were implausibly high, low, or significantly conflicted with established age or temporal patterns.

### Modelling strategy

For GBD 2017, we estimated mortality due to the total of all gynaecological diseases as well as each of the sub-categories using CODEm. We assumed no deaths from premenstrual syndrome and primary infertility, which we model for non-fatal outcomes.

Continuing in GBD 2017, we have reassigned deaths due to leiomyomas and other benign uterine tumors to uterine fibroids.

Covariates included in the CODEm models for each gynaecological disorder by level and direction:

### Gynaecological disorders

| Covariate name                      | Level | Direction |
|-------------------------------------|-------|-----------|
| Education, years per capita         | 3     | -1        |
| LDI per capita                      | 3     | -1        |
| Percentage births in over 35s       | 2     | 1         |
| Skilled birth attendance proportion | 2     | -1        |
| Smoking prevalence                  | 1     | 0         |

|                                     |   |    |
|-------------------------------------|---|----|
| TFR                                 | 2 | 1  |
| Health system access capped         | 2 | -1 |
| Socio-demographic Index             | 3 | -1 |
| Healthcare access and quality index | 2 | -1 |

### Uterine Fibroids

| Covariate Name                      | Level | Direction |
|-------------------------------------|-------|-----------|
| Education, years per capita         | 3     | -1        |
| LDI per capita                      | 3     | -1        |
| percentage births in over 35s       | 2     | 1         |
| Skilled birth attendance proportion | 2     | -1        |
| Smoking prevalence                  | 1     | 0         |
| TFR                                 | 2     | 1         |
| health system access capped         | 2     | -1        |
| Socio-demographic Index             | 3     | -1        |
| Healthcare access and quality index | 2     | -1        |

### PCOS

| Covariate Name                      | Level | Direction |
|-------------------------------------|-------|-----------|
| Education, years per capita         | 3     | -1        |
| LDI per capita                      | 3     | -1        |
| percentage births in over 35s       | 2     | 1         |
| Skilled birth attendance proportion | 2     | -1        |
| Smoking prevalence                  | 1     | 0         |
| TFR                                 | 2     | 1         |
| health system access capped         | 2     | -1        |
| Socio-demographic Index             | 3     | -1        |
| Healthcare access and quality index | 2     | -1        |

### Endometriosis

| Covariate Name                      | Level | Direction |
|-------------------------------------|-------|-----------|
| Education, years per capita         | 3     | -1        |
| LDI per capita                      | 3     | -1        |
| percentage births in over 35s       | 2     | 1         |
| Skilled birth attendance proportion | 2     | -1        |
| Smoking prevalence                  | 1     | 0         |
| TFR                                 | 2     | 1         |
| health system access capped         | 2     | -1        |
| Socio-demographic Index             | 3     | -1        |
| Healthcare access and quality index | 2     | -1        |

## Genital Prolapse

| Covariate Name                      | Level | Direction |
|-------------------------------------|-------|-----------|
| Education, years per capita         | 3     | -1        |
| LDI per capita                      | 3     | -1        |
| Percentage births in over 35s       | 2     | 1         |
| Skilled birth attendance proportion | 2     | -1        |
| Smoking prevalence                  | 1     | 0         |
| TFR                                 | 2     | 1         |
| health system access capped         | 2     | -1        |
| Socio-demographic Index             | 3     | -1        |
| Healthcare access and quality index | 2     | -1        |

## Other gynecological disorders

| Covariate Name                      | Level | Direction |
|-------------------------------------|-------|-----------|
| Education, years per capita         | 3     | -1        |
| LDI per capita                      | 3     | -1        |
| Percentage births in over 35s       | 2     | 1         |
| Skilled birth attendance proportion | 2     | -1        |
| Smoking prevalence                  | 1     | 0         |
| TFR                                 | 2     | 1         |
| health system access capped         | 2     | -1        |
| Socio-demographic Index             | 3     | -1        |
| Healthcare access and quality index | 2     | -1        |

## ICD10 and ICD9 codes used for gynecological disorders

| Model                          | ICD10 code                                                                                   | ICD9 code                        |
|--------------------------------|----------------------------------------------------------------------------------------------|----------------------------------|
| Uterine fibroids               | D25-D26.9, D28.2                                                                             | 218-219.9, 236.0                 |
| Endometriosis                  | N80-N80.9                                                                                    | 617-617.9                        |
| Genital prolapse               | N81-N81.9                                                                                    | 618-618.9                        |
| Polycystic ovarian syndrome    | E28.2                                                                                        | 256.4                            |
| Other gynaecological disorders | B37.3-B37.49, N61 -<br>N64.9, N72, N75 -<br>N77.8, N83 - N86,<br>N88 - N91.5, N94 -<br>N95.9 | 112.1-112.2, 611-619, 620-629.81 |



## Haemoglobinopathies and Haemolytic Anaemias

This write-up covers the following sub-causes: Sickle cell disorders, thalassaemias, glucose-6-phosphate dehydrogenase (G6PD) deficiency, and other haemoglobinopathies and haemolytic anaemias

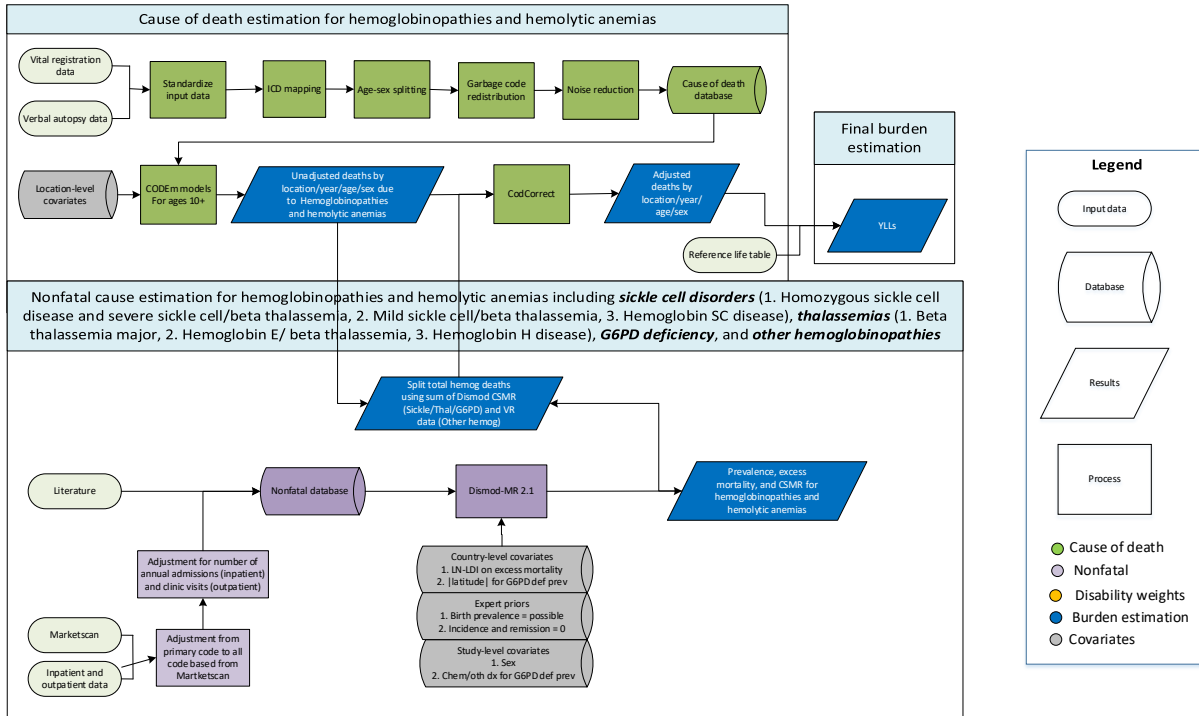

### Input data

For GBD 2017, the overall CODEm model for haemoglobinopathies and haemolytic anaemias was informed by centrally prepped data stored in the cause of death (COD) database. All data from all geographies were reviewed. Outliers were identified as those data where age patterns or temporal patterns were inconsistent with neighbouring age groups or locations or where sparse data were predicting implausible overall temporal or age patterns for a given location.

DisMod-MR 2.1 was used to estimate sickle cell disorders, thalassaemias, and G6PD deficiency age- and sex-specific prevalence and mortality for each location and year in the GBD. Three sources of data were used for DisMod-MR 2.1 models: literature, Marketscan data, and ICD-9 & ICD-10 hospital data. Each datum for sickle cell disease models was used for one of three mutually exclusive conditions: 1) homozygous sickle cell disease and severe sickle cell/beta thalassaemia, 2) mild sickle cell/beta thalassaemia, or 3) Hemoglobin SC disease. We similarly extracted data for thalassaemias using three mutually exclusive disease states: 1) beta thalassaemia major, 2) haemoglobin E/beta thalassaemia, and 3) haemoglobin H disease. G6PD deficiency was estimated as a single model. Cause-specific mortality rates for other haemoglobinopathies and haemolytic anaemias, lacking more specific data, was assumed to be geographically uniform, but did vary by age and sex; the levels and trends were informed by analysis of VR data from the COD database.

We added data from select geographies identified by GBD collaborators for GBD 2017. Our last comprehensive literature review was completed in GBD 2015, where we identified data on prevalence, excess mortality rate, or with-condition mortality rate. Age-specific survival probabilities from cohort studies were converted to corresponding with-condition mortality rates. G6PD deficiency is an X-linked recessive genetic disease, and genetic homozygosity served as the reference definition for our DisMod-MR 2.1 models in 2015. This was a change from GBD 2013, when we quantified G6PD deficiency on reagent tests as the reference category. Second, we extracted ICD-9-coded MarketScan data from the United States, correcting for multiple admissions, primary versus non-primary coding, and outpatient versus inpatient visits as determined from patient linkage analysis. Third, we used ICD-9 and ICD-10 inpatient and outpatient hospital data from all those locations where it was available, applying correction factors from analysis of claims data. These included correction factors for multiple admissions, age- and sex-specific ratio of prevalence that would be derived from only using the primary discharge ICD code versus that derived from using any of the discharge diagnosis codes, also accounting for differences in geography-specific overall hospitalisation rate when calculating the ratio. We applied this as a correction factor for those sources where only a single ICD code is given for each discharge. Of note, there were no hospital data available for haemoglobin E/beta-thalassaemia, haemoglobin H disease, or G6PD deficiency. All prevalence data from MarketScan, hospital sources, and literature were uploaded to the non-fatal database.

### **Modelling strategy**

We completed seven separate DisMod-MR 2.1 models, as listed above. Several used log-transformed lag-distributed income as a country-level covariate on excess mortality, which had the effect of predicting higher excess mortality in those locations with lower national income. The only study covariate used for most models was for sex. Genetic G6PD deficiency is far more common in males, but for all others the male to female ratio is nearly equivalent. Our G6PD deficiency model included additional study covariates to crosswalk from non-genetic diagnostic tests (eg, chemical reagent testing) back to the reference definition. Incidence and remission were both set to be zero.

We completed data-rich (DR) and global CODEm models for males and females separately. The sum of CSMR from all seven DisMod-MR 2.1 models was used as a predictive covariate for CODEm model development. CODEm results were then split between sickle cell disorders, thalassaemias, G6PD deficiency, and other haemoglobinopathies and haemolytic anaemias using summed and scaled CSMR outputs from the same models. Other haemoglobinopathies and haemolytic anaemias did not have a separate DisMod-MR 2.1 model, but was instead informed by location-specific VR data.

The primary limitation of our estimation is data availability. We elected a hybrid approach of CODEm and DisMod-MR 2.1 to improve the quality of estimates in data-poor locations, but in most of these locations data are still relatively sparse for non-fatal models, which leads to relatively large uncertainty. Further adding to the uncertainty is the fact that haemoglobinopathies dramatically increase the risk of mortality due to infectious agents such as malaria, lower respiratory infections, and diarrhoea, as well as increasing the risk of maternal mortality. In locations with poor diagnostic capabilities and high infectious burden, it is thus very plausible that mortality due to haemoglobinopathies may be even higher. Secondly, our specification of seven distinct entities for DisMod-MR 2.1 models does not align perfectly with the cause categories in the central COD prep, which limits the extent to which CSMR data from the COD database can inform non-fatal models. We will continue to work to expand our dataset and consolidate the GBD analysis of haemoglobinopathies going forward.

### Covariates in parent CODEm model

| Covariate                                                                                                    | Transformation | Level* | Direction* |
|--------------------------------------------------------------------------------------------------------------|----------------|--------|------------|
| Education                                                                                                    | None           | 3      | -1         |
| LDI                                                                                                          | Log            | 3      | -1         |
| Haemoglobinopathies (sum of prevalence * excess-mortality from all DisMod models)                            | None           | 1      | 1          |
| Sickle Cell & Thal (sum of prevalence * excess-mortality from all DisMod models – excluding G6PD deficiency) | None           | 1      | 1          |
| Latitude under 15 (proportion)                                                                               | None           | 3      | 1          |
| Latitude 15 to 30 (proportion)                                                                               | None           | 3      | 1          |
| Latitude 30 to 45 (proportion)                                                                               | None           | 3      | 0          |
| Latitude over 45 (proportion)                                                                                | None           | 3      | -1         |
| Socio-demographic Index                                                                                      | None           | 3      | -1         |
| Healthcare access and quality index                                                                          | None           | 2      | -1         |
| Health System Access, Capped                                                                                 | None           | 2      | -1         |
| Malaria Lysenko PFPR 1 (Holoendemic)                                                                         | None           | 3      | 1          |

\*Level refers to the likelihood of a relationship between the covariate and mortality (1 = more likely; 3 = less likely); direction refers to the direction of the relationship (1 = positive correlation; -1 = negative correlation).

## Endocrine, Metabolic, Blood, and Immune Disorders

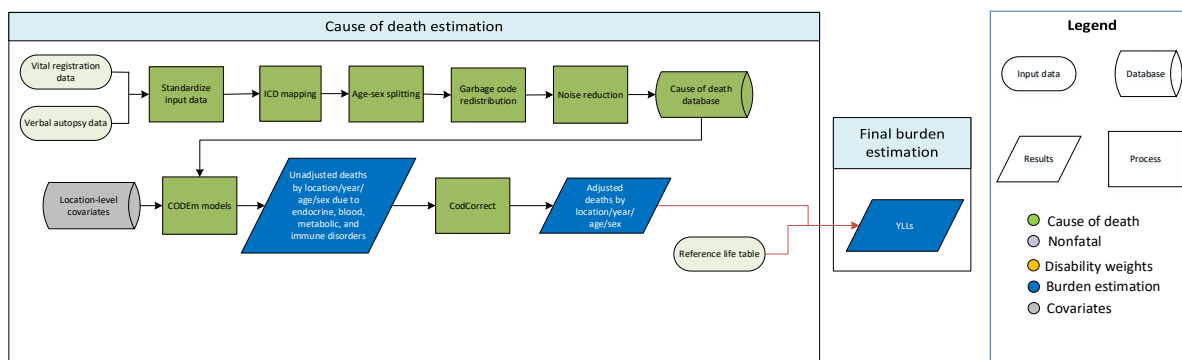

### Input data

Vital registration and verbal autopsy data were used to model mortality due to endocrine, metabolic, blood, and immune disorders. Data were standardised and mapped according to the GBD causes of death ICD mapping method. These data were then age-sex split, and appropriate redistribution of garbage code data was performed. After applying noise reduction, these data were uploaded to the COD database. Outliers were identified by systematic examination of data points for all location-years. Data points that violated well-established age or time trends or that resulted in extremely high or low cause fractions were determined to be outliers.

### Modelling strategy

The estimation strategy used for fatal endocrine, blood, metabolic, and immune disorders is largely similar to methods used in GBD 2016. A standard CODEm model with location-level covariates was used to model deaths due to endocrine, blood, metabolic, and immune disorders. Iterations of models were assessed at the location/year/age group/sex level to determine whether data points merited exclusion via outliering. Unadjusted death estimates were adjusted using CoDCorrect to produce final estimates of YLLs. The covariates used are displayed below.

| Level | Covariate                           | Direction |
|-------|-------------------------------------|-----------|
| 1     | Mean BMI                            | +         |
| 2     | Animal fat (kcal per capita)        | +         |
|       | Alcohol (litres per capita)         | +         |
|       | Total calories (kcal per capita)    | +         |
|       | Mean cholesterol                    | +         |
|       | Healthcare access and quality index | -         |
| 3     | Socio-demographic Index             | 0         |
|       | Log LDI (\$I per capita)            | -         |
|       | Education (years per capita)        | -         |

## Sudden Infant Death Syndrome (SIDS)

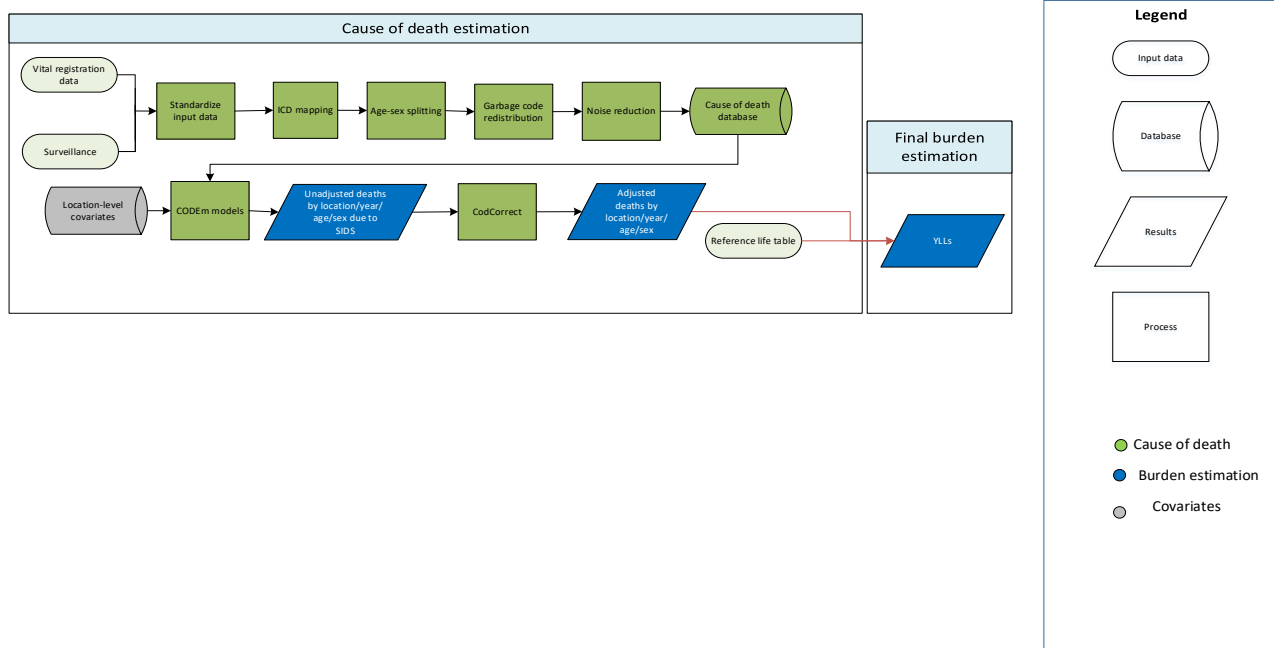

### Input data

Vital registration data were used to estimate deaths due to sudden infant death syndrome (SIDS). Data points were selected as outliers if they met the following criteria: (1) implausibly high values relative to country time trends or global or regional patterns, based on the assumption that there are not “outbreaks” of SIDS, or (2) substantially conflicting with established age or temporal patterns. In addition, for GBD 2017, all deaths assigned to SIDS outside of 4- and 5-star countries were reassigned to neonatal disorders. SIDS can only be ascertained as a cause of death by autopsy, which is unlikely to have been used outside of 4- and 5-star countries.

### Modelling strategy

The standard CODEm modelling approach was applied to estimate deaths due to SIDS. We ran CODEm models for ages 7–27 days and 28–364 days because we believe that deaths assigned to SIDS in other age groups are mis-assigned and these are therefore treated as garbage codes. Surveillance data and verbal autopsy data were not used as inputs to this model because these sources do not use data collection methods that can accurately diagnose deaths due to SIDS.

Notable differences between the GBD 2013 and GBD 2015 strategy included updates across the board to smoking-related covariates, total fertility rate, and Socio-demographic Index covariates. The addition of American Samoa to the Oceania region was also of note, as well as the shift to including more ICD detail codes in the input data for some countries that previously reported only aggregated codes. There were no significant changes in strategy from GBD 2015 to GBD 2017.

Covariates are shown in the following table.

| Level | Covariate                                              | Direction |
|-------|--------------------------------------------------------|-----------|
| 1     | Tobacco (cigarettes per capita)                        | +         |
|       | In-facility delivery (proportion)                      | -         |
| 2     | Underweight (proportion <2SD weight for age, <5 years) | +         |
|       | Skilled birth attendance (proportion)                  | -         |
| 3     | LDI (I\$ per capita)                                   | 0         |
|       | Education (years per capita)                           | -         |
|       | Total fertility rate                                   | +         |
|       | Socio-demographic Index                                | 0         |

## Injuries

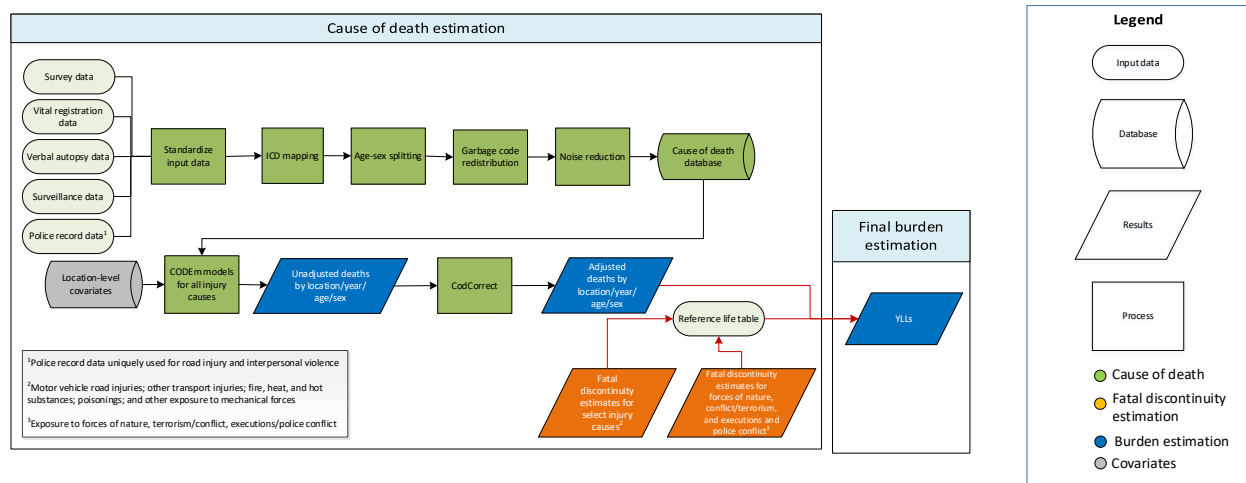

### Input data

In GBD 2017, we estimated injury mortality from vital registration, verbal autopsy, mortality surveillance, censuses, surveys, and police record data. Police and crime reports were data sources uniquely used for the estimation of deaths from road traffic injury and interpersonal violence. The police data were collected from published studies, national agencies, and institutional surveys such as the United Nations Crime Trends Survey and the WHO Global Status Report on Road Safety Survey. For countries with vital registration data we did not use police records, except if the recorded number of road injury and interpersonal violence deaths from police records exceeded that in the vital registration.

Infrequently, data points were marked as outliers. Outlier criteria excluded data points that (1) were implausibly high or low relative to global or regional patterns, (2) substantially conflicted with established age or temporal patterns, or (3) significantly conflicted with other data sources conducted from the same locations or locations with similar characteristics (ie, Socio-demographic Index).

### Modelling strategy

#### Overview

In GBD 2017, the standard CODEm modelling approach was applied to estimate deaths due to all causes of injury, excluding “Exposure to forces of nature,” and “Conflict and terrorism”. These causes were modelled solely outside of the CODEm process as fatal discontinuities estimation; this process is detailed further in the section on fatal discontinuities estimation in the appendix.

Fatal discontinuity was estimated for ten injury causes also modelled in CODEm. These causes included “Road injuries”, “Motor vehicle road injuries”, “Other transport injuries”, “Fire, heat, and hot substances”, “Poisonings”, “Environmental exposure to heat and cold”, “Other unintentional injuries”, “Interpersonal violence”, “Other exposure to mechanical forces”, and “Executions and police conflict”. Final fatal discontinuity estimations for these causes were merged with CODEm results post-CoDCorrect to produce final cause of death results.

Refer to the table at the end of this section for a complete list of the cause-of-injury categories, modelling strategies, and covariate changes from GBD 2016.

#### GBD injury codes and categories

The International Classification of Diseases (ICD) was used to classify injuries. In GBD, injury incidence and death are defined as ICD-9 codes E000-E999 and ICD-10 chapters V to Y. There is one exception: deaths and cases of alcohol poisoning and drug overdoses are classified under drug and alcohol use disorders. In GBD 2017, injury causes were organized into 28 mutually exclusive and collectively exhaustive external cause-of-injury categories. For GBD 2017, “Poisoning” was differentiated into “Poisoning by carbon monoxide,” and “Poisoning by other”, and “Unintentional suffocation” was removed as its ICD codes were added to the “Pulmonary aspiration and foreign body in airway” cause.

#### Preparation of data

The preparation of cause of death data includes age splitting, age-sex splitting, smoothing, and outlier detection. These steps are described in detail by Naghavi and colleagues and Lozano and colleagues.<sup>1,2,3</sup> The concept of “garbage codes” and redistribution of these codes was proposed in GBD 1990.<sup>4</sup> Garbage codes are causes of death that should not be identified as specific underlying causes of death but have been entered as the underlying cause of death on death certificates. A classic example of these types of codes in injuries chapters are “Exposure to unspecified factor” (X59 in ICD-10 and E887 in ICD-9) and all undetermined intent codes (Y10-Y34 in ICD-10 and E980-E988 in ICD-9). Other examples of garbage codes in injuries are the coding of an injury death to intermediate codes like septicaemia or peritonitis or as an ill-defined and unknown cause of mortality (R99). Approximately 2% of total deaths in countries with vital registration data are assigned to these three injury garbage code categories.

#### Splitting into sublevel causes

In countries with non-detail ICD code data, cause-of-injury categories were proportionally split into sublevel cause-of-injury categories. The sublevel cause-of-injury causes were created in the CoDCorrect process. One of the countries with non-detail ICD code data is South Africa, and in GBD 2013 the proportions of sublevel cause-of-injury were based on vital registration data. For GBD iterations of 2015, 2016, and 2017, the proportions were based on post-mortem investigation of injury deaths as described in the paper by Matzopoulos and colleagues 2015.<sup>5</sup>

#### Limitations and model assumptions

We added police data for road injuries and interpersonal violence to help predict level and age patterns in countries with sparse or absent cause of death data even though we know from countries with near-complete vital registration data that police records tend to underestimate the true level of deaths. However, we applied police data estimates in instances where reported deaths were higher than vital registration numbers.

#### Covariates

The following covariates were included.

| Transport injuries |                                           |           |
|--------------------|-------------------------------------------|-----------|
| Level              | Covariate                                 | Direction |
| 1                  | Alcohol (litres per capita)               | +         |
| 1                  | Vehicles – 2 wheels fraction (proportion) | +         |



|                                 |                                                    |           |
|---------------------------------|----------------------------------------------------|-----------|
| 1                               | Vehicles – 2+4 wheels (per capita)                 | +         |
| 2                               | Healthcare access and quality index                | -         |
| 2                               | LDI (I\$ per capita)                               | 0         |
| 2                               | Population density (300-500 ppl/sqkm, proportion)  | 0         |
| 2                               | Population density (500-1000 ppl/sqkm, proportion) | 0         |
| 3                               | Education (years per capita)                       | -         |
| 3                               | Rainfall quintile 5 (proportion)                   | +         |
| 3                               | Socio-demographic Index                            | -         |
| <b>Road injuries</b>            |                                                    |           |
| Level                           | Covariate                                          | Direction |
| 1                               | Alcohol (litres per capita)                        | +         |
| 1                               | Log-transformed SEV scalar: Road Inj               | +         |
| 1                               | Vehicles – 2 wheels (per capita)                   | +         |
| 1                               | Vehicles – 2 wheels fraction (proportion)          | +         |
| 1                               | Vehicles – 2+4 wheels (per capita)                 | +         |
| 1                               | Vehicles – 4 wheels (per capita)                   | +         |
| 2                               | Healthcare access and quality index                | -         |
| 2                               | Population 15 to 30 (proportion)                   | +         |
| 2                               | Population density (300-500 ppl/sqkm, proportion)  | 0         |
| 2                               | Population density (500-1000 ppl/sqkm, proportion) | 0         |
| 3                               | Education (years per capita)                       | -         |
| 3                               | LDI (I\$ per capita)                               | 0         |
| 3                               | Socio-demographic Index                            | -         |
| <b>Pedestrian road injuries</b> |                                                    |           |
| Level                           | Covariate                                          | Direction |
| 1                               | Alcohol (litres per capita)                        | +         |
| 1                               | Log-transformed SEV scalar: Pedest                 | +         |
| 1                               | Vehicles – 2 wheels fraction (proportion)          | +         |
| 1                               | Vehicles – 2+4 wheels (per capita)                 | +         |
| 2                               | Healthcare access and quality index                | -         |
| 2                               | LDI (I\$ per capita)                               | 0         |
| 2                               | Population density (300-500 ppl/sqkm, proportion)  | 0         |
| 2                               | Population density (500-1000 ppl/sqkm, proportion) | 0         |
| 3                               | Education (years per capita)                       | -         |
| 3                               | Rainfall quintile 5 (proportion)                   | +         |
| 3                               | Socio-demographic Index                            | -         |

| <b>Cyclist road injuries</b>       |                                                    |           |
|------------------------------------|----------------------------------------------------|-----------|
| Level                              | Covariate                                          | Direction |
| 1                                  | Alcohol (litres per capita)                        | +         |
| 1                                  | Log-transformed SEV scalar: Cyclist                | +         |
| 1                                  | Vehicles – 2 wheels fraction (proportion)          | +         |
| 1                                  | Vehicles – 2+4 wheels (per capita)                 | +         |
| 2                                  | Healthcare access and quality index                | -         |
| 2                                  | LDI (I\$ per capita)                               | 0         |
| 2                                  | Population density (300-500 ppl/sqkm, proportion)  | 0         |
| 2                                  | Population density (500-1000 ppl/sqkm, proportion) | 0         |
| 3                                  | Education (years per capita)                       | -         |
| 3                                  | Socio-demographic Index                            | 0         |
| <b>Motorcyclist road injuries</b>  |                                                    |           |
| Level                              | Covariate                                          | Direction |
| 1                                  | Alcohol (litres per capita)                        | +         |
| 1                                  | Log-transformed SEV scalar: Mot Cyc                | +         |
| 1                                  | Vehicles – 2 wheels (per capita)                   | +         |
| 2                                  | Healthcare access and quality index                | -         |
| 2                                  | LDI (I\$ per capita)                               | 0         |
| 2                                  | Population density (300-500 ppl/sqkm, proportion)  | 0         |
| 2                                  | Population density (500-1000 ppl/sqkm, proportion) | 0         |
| 3                                  | Education (years per capita)                       | -         |
| 3                                  | Rainfall quintile 5 (proportion)                   | +         |
| 3                                  | Socio-demographic Index                            | 0         |
| <b>Motor vehicle road injuries</b> |                                                    |           |
| Level                              | Covariate                                          | Direction |
| 1                                  | Alcohol (litres per capita)                        | +         |
| 1                                  | Log-transformed SEV scalar: Mot Veh                | +         |
| 1                                  | Vehicles – 4 wheels (per capita)                   | +         |
| 2                                  | Healthcare access and quality index                | -         |
| 2                                  | Population density (300-500 ppl/sqkm, proportion)  | 0         |
| 2                                  | Population density (500-1000 ppl/sqkm, proportion) | 0         |
| 3                                  | Education (years per capita)                       | 0         |
| 3                                  | LDI (I\$ per capita)                               | 0         |
| 3                                  | Rainfall quintile 5 (proportion)                   | +         |
| 3                                  | Socio-demographic Index                            | 0         |

| <b>Other road injuries</b>      |                                                        |           |
|---------------------------------|--------------------------------------------------------|-----------|
| Level                           | Covariate                                              | Direction |
| 1                               | Alcohol (litres per capita)                            | +         |
| 1                               | Log-transformed SEV scalar: Oth Road                   | +         |
| 1                               | Vehicles – 2 wheels fraction (proportion)              | +         |
| 1                               | Vehicles – 2+4 wheels (per capita)                     | +         |
| 2                               | Healthcare access and quality index                    | -         |
| 2                               | LDI (I\$ per capita)                                   | 0         |
| 3                               | Rainfall quintile 5 (proportion)                       | +         |
| 3                               | Socio-demographic Index                                | -         |
|                                 |                                                        |           |
| <b>Other transport injuries</b> |                                                        |           |
| Level                           | Covariate                                              | Direction |
| 1                               | Alcohol (litres per capita)                            | +         |
| 1                               | Log-transformed SEV scalar: Oth Trans                  | +         |
| 1                               | Vehicles – 2 wheels fraction (proportion)              | +         |
| 1                               | Vehicles – 2+4 wheels (per capita)                     | +         |
| 2                               | Healthcare access and quality index                    | -         |
| 2                               | Population density (300-500 ppl/sqkm, proportion)      | 0         |
| 2                               | Population density (500-1000 ppl/sqkm, proportion)     | 0         |
| 3                               | Education (years per capita)                           | 0         |
| 3                               | LDI (I\$ per capita)                                   | 0         |
| 3                               | LDI (I\$ per capita)                                   | +         |
| 3                               | Rainfall quintile 5 (proportion)                       | +         |
| 3                               | Socio-demographic Index                                | 0         |
|                                 |                                                        |           |
| <b>Unintentional injuries</b>   |                                                        |           |
| Level                           | Covariate                                              | Direction |
| 1                               | Cumulative cigarettes (5 Years)                        | +         |
| 1                               | Diabetes fasting plasma glucose (mmol/L)               | +         |
| 1                               | Health system access 2 (unitless)                      | -         |
| 1                               | Indoor air pollution (all cooking fuels)               | +         |
| 1                               | Smoking prevalence                                     | +         |
| 1                               | Underweight (proportion <2SD weight for age, <5 years) | +         |
| 2                               | Alcohol (litres per capita)                            | +         |
| 2                               | Population density (500-1000 ppl/sqkm, proportion)     | +         |
| 2                               | Population density (over 1000 ppl/sqkm, proportion)    | +         |
| 3                               | Education (years per capita)                           | -         |
| 3                               | LDI (I\$ per capita)                                   | -         |

| <b>Falls</b>                          |                                                     |           |
|---------------------------------------|-----------------------------------------------------|-----------|
| Level                                 | Covariate                                           | Direction |
| 1                                     | Alcohol (litres per capita)                         | +         |
| 1                                     | Log-transformed SEV scalar: Falls                   | +         |
| 2                                     | Healthcare access and quality index                 | -         |
| 2                                     | Milk adjusted (g)                                   | -         |
| 3                                     | Elevation over 1500m (proportion)                   | +         |
| 3                                     | LDI (I\$ per capita)                                | 0         |
| 3                                     | Socio-demographic Index                             | 0         |
| <b>Drowning</b>                       |                                                     |           |
| Level                                 | Covariate                                           | Direction |
| 1                                     | Alcohol (litres per capita)                         | +         |
| 1                                     | Coastal population within 10km (proportion)         | +         |
| 1                                     | Landlocked nation (binary)                          | -         |
| 1                                     | Log-transformed SEV scalar: Drown                   | +         |
| 1                                     | Rainfall quintile 1 (proportion)                    | -         |
| 1                                     | Rainfall quintile 5 (proportion)                    | +         |
| 2                                     | Elevation under 100m (proportion)                   | +         |
| 3                                     | Education (years per capita)                        | -         |
| 3                                     | LDI (I\$ per capita)                                | 0         |
| 3                                     | Socio-demographic Index                             | -         |
| <b>Fire, heat, and hot substances</b> |                                                     |           |
| Level                                 | Covariate                                           | Direction |
| 1                                     | Log-transformed SEV scalar: Fire                    | +         |
| 2                                     | Alcohol (litres per capita)                         | +         |
| 2                                     | Healthcare access and quality index                 | -         |
| 2                                     | Indoor air pollution (all cooking fuels)            | +         |
| 2                                     | Population density (over 1000 ppl/sqkm, proportion) | 0         |
| 2                                     | Tobacco (cigarettes per capita)                     | +         |
| 3                                     | Education (years per capita)                        | -         |
| 3                                     | LDI (I\$ per capita)                                | 0         |
| 3                                     | Socio-demographic Index                             | -         |
| <b>Poisonings</b>                     |                                                     |           |
| Level                                 | Covariate                                           | Direction |
| 1                                     | Log-transformed SEV scalar: Poison                  | +         |

|                                       |                                                     |           |
|---------------------------------------|-----------------------------------------------------|-----------|
| 1                                     | Opium cultivation (binary)                          | +         |
| 2                                     | Healthcare access and quality index                 | -         |
| 2                                     | Population density (over 1000 ppl/sqkm, proportion) | 0         |
| 2                                     | Population density (under 150 ppl/sqkm, proportion) | 0         |
| 3                                     | Education (years per capita)                        | -         |
| 3                                     | LDI (I\$ per capita)                                | 0         |
| 3                                     | Socio-demographic Index                             | -         |
| <b>Poisoning by carbon monoxide</b>   |                                                     |           |
| Level                                 | Covariate                                           | Direction |
| 3                                     | Education (years per capita)                        | -         |
| 3                                     | Healthcare access and quality index                 | -         |
| 3                                     | LDI (I\$ per capita)                                | 0         |
| 3                                     | Socio-demographic Index                             | 0         |
| <b>Poisoning by other means</b>       |                                                     |           |
| Level                                 | Covariate                                           | Direction |
| 3                                     | Education (years per capita)                        | -         |
| 3                                     | Healthcare access and quality index                 | -         |
| 3                                     | LDI (I\$ per capita)                                | 0         |
| 3                                     | Socio-demographic Index                             | 0         |
| <b>Exposure to mechanical forces</b>  |                                                     |           |
| Level                                 | Covariate                                           | Direction |
| 2                                     | Alcohol (litres per capita)                         | +         |
| 2                                     | Healthcare access and quality index                 | -         |
| 2                                     | Population density (over 1000 ppl/sqkm, proportion) | 0         |
| 2                                     | Population density (under 150 ppl/sqkm, proportion) | 0         |
| 3                                     | Education (years per capita)                        | -         |
| 3                                     | LDI (I\$ per capita)                                | 0         |
| 3                                     | Socio-demographic Index                             | -         |
| <b>Unintentional firearm injuries</b> |                                                     |           |
| Level                                 | Covariate                                           | Direction |
| 1                                     | Log-transformed SEV scalar: Mech Gun                | +         |
| 2                                     | Alcohol (litres per capita)                         | +         |
| 2                                     | Health system access (unitless)                     | -         |
| 2                                     | Healthcare access and quality index                 | -         |
| 3                                     | Education (years per capita)                        | -         |

|                                             |                                                     |           |
|---------------------------------------------|-----------------------------------------------------|-----------|
| 3                                           | LDI (I\$ per capita)                                | 0         |
| 3                                           | Population density (over 1000 ppl/sqkm, proportion) | 0         |
| 3                                           | Population density (under 150 ppl/sqkm, proportion) | 0         |
| 3                                           | Socio-demographic Index                             | -         |
| <b>Other exposure to mechanical forces</b>  |                                                     |           |
| Level                                       | Covariate                                           | Direction |
| 1                                           | Log-transformed SEV scalar: Oth Mech                | +         |
| 2                                           | Alcohol (litres per capita)                         | +         |
| 2                                           | Health system access (unitless)                     | -         |
| 2                                           | Healthcare access and quality index                 | -         |
| 2                                           | Population density (over 1000 ppl/sqkm, proportion) | 0         |
| 2                                           | Population density (under 150 ppl/sqkm, proportion) | 0         |
| 3                                           | Education (years per capita)                        | -         |
| 3                                           | LDI (I\$ per capita)                                | 0         |
| 3                                           | Socio-demographic Index                             | -         |
| <b>Adverse effects of medical treatment</b> |                                                     |           |
| Level                                       | Covariate                                           | Direction |
| 2                                           | Healthcare access and quality index                 | 0         |
| 3                                           | LDI (I\$ per capita)                                | 0         |
| 3                                           | Socio-demographic Index                             | 0         |
| <b>Animal contact</b>                       |                                                     |           |
| Level                                       | Covariate                                           | Direction |
| 1                                           | Alcohol (litres per capita)                         | +         |
| 1                                           | Log-transformed SEV scalar: Animal                  | +         |
| 2                                           | Healthcare access and quality index                 | -         |
| 2                                           | Population 15 to 30 (proportion)                    | +         |
| 3                                           | Education (years per capita)                        | -         |
| 3                                           | Elevation over 1500m (proportion)                   | 0         |
| 3                                           | Elevation under 100m (proportion)                   | 0         |
| 3                                           | LDI (I\$ per capita)                                | 0         |
| 3                                           | Population density (over 1000 ppl/sqkm, proportion) | 0         |
| 3                                           | Population density (under 150 ppl/sqkm, proportion) | 0         |
| 3                                           | Socio-demographic Index                             | -         |
| <b>Venomous animal contact</b>              |                                                     |           |
| Level                                       | Covariate                                           | Direction |

|                                                        |                                                     |           |
|--------------------------------------------------------|-----------------------------------------------------|-----------|
| 1                                                      | Alcohol (litres per capita)                         | +         |
| 1                                                      | Log-transformed SEV scalar: Venom                   | +         |
| 2                                                      | Healthcare access and quality index                 | -         |
| 3                                                      | Education (years per capita)                        | -         |
| 3                                                      | Elevation over 1500m (proportion)                   | 0         |
| 3                                                      | Elevation under 100m (proportion)                   | 0         |
| 3                                                      | LDI (I\$ per capita)                                | 0         |
| 3                                                      | Population density (over 1000 ppl/sqkm, proportion) | 0         |
| 3                                                      | Population density (under 150 ppl/sqkm, proportion) | 0         |
| 3                                                      | Socio-demographic Index                             | -         |
|                                                        |                                                     |           |
| <b>Non-venomous animal contact</b>                     |                                                     |           |
| Level                                                  | Covariate                                           | Direction |
| 1                                                      | Alcohol (litres per capita)                         | +         |
| 1                                                      | Log-transformed SEV scalar: Non Ven                 | +         |
| 2                                                      | Healthcare access and quality index                 | -         |
| 3                                                      | Alcohol (litres per capita)                         | +         |
| 3                                                      | Education (years per capita)                        | -         |
| 3                                                      | Elevation over 1500m (proportion)                   | 0         |
| 3                                                      | Elevation under 100m (proportion)                   | 0         |
| 3                                                      | Healthcare access and quality index                 | -         |
| 3                                                      | LDI (I\$ per capita)                                | 0         |
| 3                                                      | Population density (over 1000 ppl/sqkm, proportion) | 0         |
| 3                                                      | Population density (under 150 ppl/sqkm, proportion) | 0         |
| 3                                                      | Socio-demographic Index                             | -         |
|                                                        |                                                     |           |
| <b>Foreign body</b>                                    |                                                     |           |
| Level                                                  | Covariate                                           | Direction |
| 1                                                      | Education (years per capita)                        | +         |
| 1                                                      | Indoor air pollution (all cooking fuels)            | +         |
| 1                                                      | LDI (I\$ per capita)                                | +         |
| 1                                                      | Population density (over 1000 ppl/sqkm, proportion) | +         |
| 1                                                      | Population over 65 (proportion)                     | +         |
| 2                                                      | Healthcare access and quality index                 | -         |
| 3                                                      | Socio-demographic Index                             | 0         |
|                                                        |                                                     |           |
| <b>Pulmonary aspiration and foreign body in airway</b> |                                                     |           |
| Level                                                  | Covariate                                           | Direction |
| 1                                                      | Log-transformed SEV scalar: F Body Asp              | +         |

|                                             |                                                     |           |
|---------------------------------------------|-----------------------------------------------------|-----------|
| 2                                           | Alcohol (litres per capita)                         | +         |
| 2                                           | Alcohol binge drinker proportion, age-standardised  | +         |
| 2                                           | Healthcare access and quality index                 | -         |
| 2                                           | Mean BMI                                            | +         |
| 3                                           | Education (years per capita)                        | -         |
| 3                                           | LDI (I\$ per capita)                                | 0         |
| 3                                           | Socio-demographic Index                             | 0         |
|                                             |                                                     |           |
| <b>Foreign body in other body part</b>      |                                                     |           |
| Level                                       | Covariate                                           | Direction |
| 1                                           | Alcohol (litres per capita)                         | +         |
| 1                                           | Log-transformed SEV scalar: Oth F Body              | +         |
| 2                                           | Healthcare access and quality index                 | -         |
| 3                                           | Education (years per capita)                        | -         |
| 3                                           | Elevation Over 1500m (proportion)                   | 0         |
| 3                                           | Elevation Under 100m (proportion)                   | 0         |
| 3                                           | LDI (I\$ per capita)                                | 0         |
| 3                                           | Population density (over 1000 ppl/sqkm, proportion) | 0         |
| 3                                           | Population density (under 150 ppl/sqkm, proportion) | 0         |
| 3                                           | Socio-demographic Index                             | -         |
|                                             |                                                     |           |
| <b>Other unintentional injuries</b>         |                                                     |           |
| Level                                       | Covariate                                           | Direction |
| 1                                           | Alcohol (liters per capita)                         | +         |
| 1                                           | Log-transformed SEV scalar: Oth Unint               | +         |
| 1                                           | Vehicles – 2 wheels (per capita)                    | +         |
| 1                                           | Vehicles – 4 wheels (per capita)                    | 0         |
| 2                                           | Healthcare access and quality index                 | -         |
| 3                                           | Education (years per capita)                        | -         |
| 3                                           | Elevation over 1500m (proportion)                   | 0         |
| 3                                           | Elevation under 100m (proportion)                   | 0         |
| 3                                           | LDI (I\$ per capita)                                | 0         |
| 3                                           | Population density (over 1000 ppl/sqkm, proportion) | 0         |
| 3                                           | Population density (under 150 ppl/sqkm, proportion) | 0         |
| 3                                           | Socio-demographic Index                             | 0         |
|                                             |                                                     |           |
| <b>Self-harm and interpersonal violence</b> |                                                     |           |
| Level                                       | Covariate                                           | Direction |
| 1                                           | Alcohol (litres per capita)                         | +         |



|                             |                                                                  |           |
|-----------------------------|------------------------------------------------------------------|-----------|
| 1                           | Healthcare access and quality index                              | +         |
| 1                           | Log-transformed SEV scalar: Oth Unint                            | +         |
| 3                           | Education (years per capita)                                     | -         |
| 3                           | Elevation over 1500m (proportion)                                | 0         |
| 3                           | Elevation under 100m (proportion)                                | 0         |
| 3                           | LDI (I\$ per capita)                                             | 0         |
| 3                           | Population density (over 1000 ppl/sqkm, proportion)              | 0         |
| 3                           | Population density (under 150 ppl/sqkm, proportion)              | 0         |
|                             |                                                                  |           |
| <b>Self-harm</b>            |                                                                  |           |
| Level                       | Covariate                                                        | Direction |
| 1                           | Alcohol (litres per capita)                                      | +         |
| 1                           | Log-transformed SEV scalar: Self Harm                            | +         |
| 1                           | Major depressive disorder                                        | +         |
| 1                           | Non-partner lifetime prevalence of sexual violence (female-only) | +         |
| 1                           | Risk of self-harm due to major depressive disorder               | +         |
| 2                           | Healthcare access and quality index                              | -         |
| 2                           | Muslim religion (proportion of population)                       | -         |
| 2                           | Population density (150-300 ppl/sqkm, proportion)                | 0         |
| 2                           | Population density (300-500 ppl/sqkm, proportion)                | 0         |
| 2                           | Population density (500-1000 ppl/sqkm, proportion)               | 0         |
| 2                           | Population density (over 1000 ppl/sqkm, proportion)              | 0         |
| 2                           | Population density (under 150 ppl/sqkm, proportion)              | 0         |
| 2                           | Religion (binary, >50% Muslim)                                   | -         |
| 3                           | Education (years per capita)                                     | 0         |
| 3                           | LDI (I\$ per capita)                                             | 0         |
| 3                           | Socio-demographic Index                                          | 0         |
|                             |                                                                  |           |
| <b>Self-harm by firearm</b> |                                                                  |           |
| Level                       | Covariate                                                        | Direction |
| 1                           | Alcohol (litres per capita)                                      | +         |
| 1                           | Log-transformed SEV scalar: Self Harm                            | +         |
| 1                           | Major depressive disorder                                        | +         |
| 2                           | Healthcare access and quality index                              | -         |
| 2                           | Population density (150-300 ppl/sqkm, proportion)                | 0         |
| 2                           | Population density (300-500 ppl/sqkm, proportion)                | 0         |
| 2                           | Population density (500-1000 ppl/sqkm, proportion)               | 0         |
| 2                           | Population density (over 1000 ppl/sqkm, proportion)              | 0         |
| 2                           | Population density (under 150 ppl/sqkm, proportion)              | 0         |

|                                           |                                                     |           |
|-------------------------------------------|-----------------------------------------------------|-----------|
| 2                                         | Religion (binary, >50% Muslim)                      | -         |
| 3                                         | Education (years per capita)                        | 0         |
| 3                                         | LDI (I\$ per capita)                                | 0         |
| 3                                         | Socio-demographic Index                             | 0         |
| <b>Self-harm by other specified means</b> |                                                     |           |
| Level                                     | Covariate                                           | Direction |
| 1                                         | Alcohol (litres per capita)                         | +         |
| 1                                         | Log-transformed SEV scalar: Self Harm               | +         |
| 1                                         | Major depressive disorder                           | +         |
| 2                                         | Healthcare access and quality index                 | -         |
| 2                                         | Population density (150-300 ppl/sqkm, proportion)   | 0         |
| 2                                         | Population density (300-500 ppl/sqkm, proportion)   | 0         |
| 2                                         | Population density (500-1000 ppl/sqkm, proportion)  | 0         |
| 2                                         | Population density (over 1000 ppl/sqkm, proportion) | 0         |
| 2                                         | Population density (under 150 ppl/sqkm, proportion) | 0         |
| 2                                         | Religion (binary, >50% Muslim)                      | -         |
| 3                                         | Education (years per capita)                        | 0         |
| 3                                         | LDI (I\$ per capita)                                | 0         |
| 3                                         | Socio-demographic Index                             | 0         |
| <b>Interpersonal violence</b>             |                                                     |           |
| Level                                     | Covariate                                           | Direction |
| 1                                         | Alcohol (liters per capita)                         | +         |
| 1                                         | Log-transformed SEV scalar: Violence                | +         |
| 2                                         | Healthcare access and quality index                 | -         |
| 2                                         | Opium cultivation (binary)                          | +         |
| 2                                         | Population density (over 1000 ppl/sqkm, proportion) | +         |
| 3                                         | Education (years per capita)                        | 0         |
| 3                                         | LDI (I\$ per capita)                                | 0         |
| 3                                         | Socio-demographic Index                             | 0         |
| <b>Assault by firearm</b>                 |                                                     |           |
| Level                                     | Covariate                                           | Direction |
| 1                                         | Alcohol (liters per capita)                         | +         |
| 1                                         | Log-transformed SEV scalar: Viol Gun                | +         |
| 2                                         | Healthcare access and quality index                 | -         |
| 2                                         | Opium cultivation (binary)                          | +         |
| 2                                         | Population density (over 1000 ppl/sqkm, proportion) | +         |

|                                             |                                                                |           |
|---------------------------------------------|----------------------------------------------------------------|-----------|
| 3                                           | Education (years per capita)                                   | 0         |
| 3                                           | LDI (I\$ per capita)                                           | 0         |
| 3                                           | Socio-demographic Index                                        | 0         |
|                                             |                                                                |           |
| <b>Assault by sharp object</b>              |                                                                |           |
| Level                                       | Covariate                                                      | Direction |
| 1                                           | Alcohol (litres per capita)                                    | +         |
| 1                                           | Log-transformed SEV scalar: Viol Knife                         | +         |
| 2                                           | Healthcare access and quality index                            | -         |
| 2                                           | Opium cultivation (binary)                                     | +         |
| 2                                           | Population density (over 1000 ppl/sqkm, proportion)            | +         |
| 3                                           | Education (years per capita)                                   | 0         |
| 3                                           | LDI (I\$ per capita)                                           | 0         |
| 3                                           | Socio-demographic Index                                        | 0         |
|                                             |                                                                |           |
| <b>Assault by other means</b>               |                                                                |           |
| Level                                       | Covariate                                                      | Direction |
| 1                                           | Alcohol (litres per capita)                                    | +         |
| 1                                           | Log-transformed SEV scalar: Oth Viol                           | +         |
| 2                                           | Healthcare access and quality index                            | -         |
| 2                                           | Opium cultivation (binary)                                     | +         |
| 2                                           | Population density (over 1000 ppl/sqkm, proportion)            | +         |
| 3                                           | Education (years per capita)                                   | 0         |
| 3                                           | LDI (I\$ per capita)                                           | 0         |
| 3                                           | Socio-demographic Index                                        | 0         |
|                                             |                                                                |           |
| <b>Environmental heat and cold exposure</b> |                                                                |           |
| Level                                       | Covariate                                                      | Direction |
| 2                                           | Healthcare access and quality index                            | -         |
| 3                                           | 90th percentile climatic temperature in the given country-year | 0         |
| 3                                           | Education (years per capita)                                   | -         |
| 3                                           | Elevation 500 to 1500m (proportion)                            | 0         |
| 3                                           | Elevation over 1500m (proportion)                              | 0         |
| 3                                           | LDI (I\$ per capita)                                           | 0         |
| 3                                           | Population fensity (150-300 ppl/sqkm, proportion)              | 0         |
| 3                                           | Population-weighted mean temperature                           | 0         |
| 3                                           | Rainfall (quintiles 4-5)                                       | 0         |
| 3                                           | Sanitation (proportion with access)                            | 0         |
| 3                                           | Socio-demographic Index                                        | -         |

| Table – Injury cause list |                                                 |                                          |                                               |
|---------------------------|-------------------------------------------------|------------------------------------------|-----------------------------------------------|
| ID                        | Cause                                           | Modelling strategy                       | Covariate changes from GBD 2016               |
| 1                         | Transport injuries                              | CODEm                                    |                                               |
| 1.1                       | Road injuries                                   | CODEm and fatal discontinuity estimation |                                               |
| 1.1.1                     | Pedestrian road injuries                        | CODEm                                    |                                               |
| 1.1.2                     | Cyclist road injuries                           | CODEm                                    |                                               |
| 1.1.3                     | Motorcyclist road injuries                      | CODEm                                    |                                               |
| 1.1.4                     | Motor vehicle road injuries                     | CODEm and fatal discontinuity estimation |                                               |
| 1.1.5                     | Other road injuries                             | CODEm                                    |                                               |
| 1.2                       | Other transport injuries                        | CODEm and fatal discontinuity estimation |                                               |
| 2                         | Unintentional injuries                          | CODEm                                    |                                               |
| 2.1                       | Falls                                           | CODEm                                    |                                               |
| 2.2                       | Drowning                                        | CODEm                                    |                                               |
| 2.3                       | Fire, heat, and hot substances                  | CODEm and fatal discontinuity estimation |                                               |
| 2.4                       | Poisonings                                      | CODEm and fatal discontinuity estimation |                                               |
| 2.4.1                     | Poisoning by carbon monoxide                    | CODEm                                    | Same covariates used as Poisoning in GBD 2016 |
| 2.4.2                     | Poisoning by other means                        | CODEm                                    | Same covariates used as Poisoning in GBD 2016 |
| 2.5                       | Exposure to mechanical forces                   | CODEm                                    |                                               |
| 2.5.1                     | Unintentional firearm injuries                  | CODEm                                    |                                               |
| 2.5.2                     | Other exposure to mechanical forces             | CODEm and fatal discontinuity estimation |                                               |
| 2.6                       | Adverse effects of medical treatment            | CODEm                                    |                                               |
| 2.7                       | Animal contact                                  | CODEm                                    |                                               |
| 2.7.1                     | Venomous animal contact                         | CODEm                                    |                                               |
| 2.7.2                     | Non-venomous animal contact                     | CODEm                                    |                                               |
| 2.8                       | Foreign body                                    | CODEm                                    |                                               |
| 2.8.1                     | Pulmonary aspiration and foreign body in airway | CODEm                                    |                                               |
| 2.8.2                     | Foreign body in other body part                 | CODEm                                    |                                               |

| Table – Injury cause list |                                         |                                          |                                 |
|---------------------------|-----------------------------------------|------------------------------------------|---------------------------------|
| ID                        | Cause                                   | Modelling strategy                       | Covariate changes from GBD 2016 |
| 2.9                       | Environmental exposure to heat and cold | CODEm and fatal discontinuity estimation |                                 |
| 2.10                      | Exposure to forces of nature            | Fatal discontinuity estimation           |                                 |
| 2.11                      | Other unintentional injuries            | CODEm and fatal discontinuity estimation |                                 |
| 3                         | Self-harm and interpersonal violence    | CODEm                                    |                                 |
| 3.1                       | Self-harm                               | CODEm                                    |                                 |
| 3.1.1                     | Self-harm by firearm                    | CODEm                                    |                                 |
| 3.1.2                     | Self-harm by other specified means      | CODEm                                    |                                 |
| 3.2                       | Interpersonal violence                  | CODEm and fatal discontinuity estimation |                                 |
| 3.2.1                     | Physical violence by firearm            | CODEm                                    |                                 |
| 3.2.2                     | Physical violence by sharp object       | CODEm                                    |                                 |
| 3.2.3                     | Physical violence by other means        | CODEm                                    |                                 |
| 3.3                       | Conflict and terrorism                  | Fatal discontinuity estimation           |                                 |
| 3.4                       | Executions and police conflict          | CODEm and fatal discontinuity estimation |                                 |

## References

- 1 Lozano R, Naghavi M, Foreman K, *et al.* Global and regional mortality from 235 causes of death for 20 age groups in 1990 and 2010: a systematic analysis for the Global Burden of Disease Study 2010. *The Lancet* 2012; **380**: 2095–128.
- 2 Global, regional, and national age–sex specific all-cause and cause-specific mortality for 240 causes of death, 1990–2013: a systematic analysis for the Global Burden of Disease Study 2013. *The Lancet* 2015; **385**: 117–71.
- 3 Global, regional, and national life expectancy, all-cause mortality, and cause-specific mortality for 249 causes of death, 1980-2015: a systematic analysis for the Global Burden of Disease Study 2015. *The Lancet* 2016; **388**: 1459-1544.
- 4 Murray CJL, Lopez AD, Harvard School of Public Health, World Health Organization, World Bank. The global burden of disease: a comprehensive assessment of mortality and disability from diseases, injuries, and risk factors in 1990 and projected to 2020. Cambridge, MA: Published by the Harvard School of Public Health on behalf of the World Health Organization and the World Bank : Distributed by Harvard University Press, 1996.

5 Matzopoulos R, Prinsloo M, Wyk VP, Gwebushe N, Mathews S, et al. Injury-related mortality in South Africa: a retrospective descriptive study of postmortem investigations. *Bull World Health Organ* 2015; **93**: 303–13.

## Fatal Discontinuities

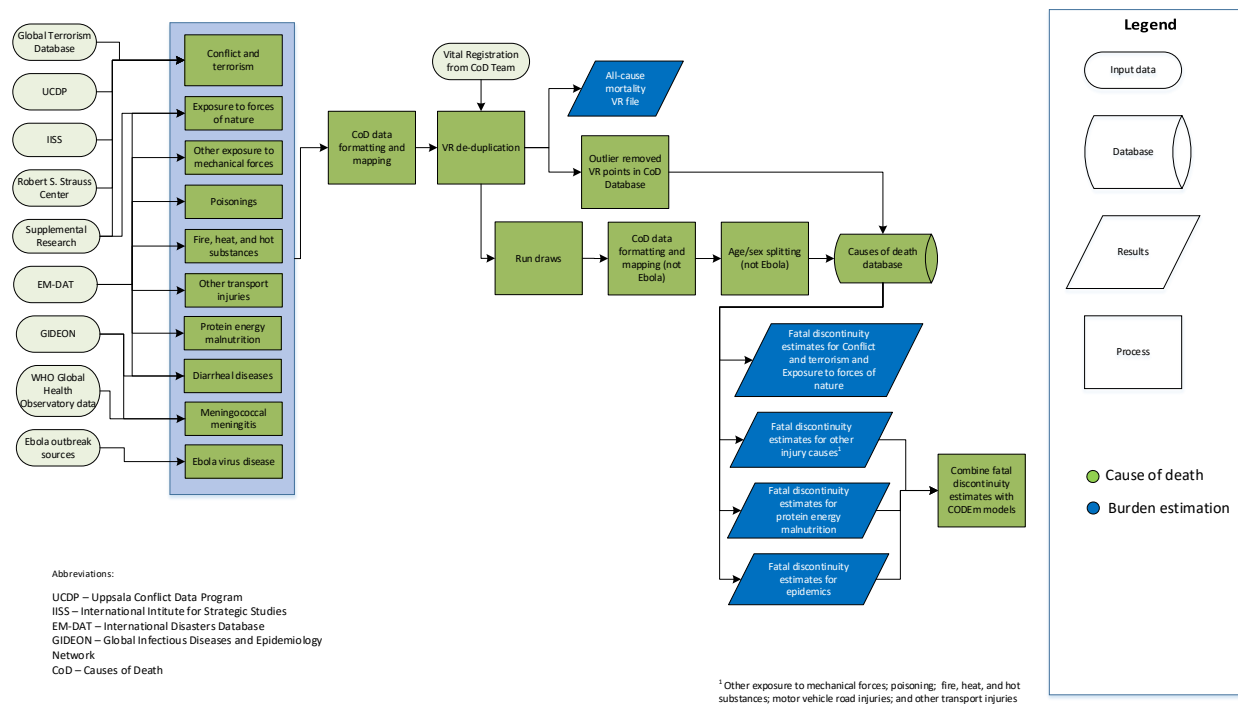

### Input data

#### Overall

Input data for fatal discontinuities are compiled a range of sources, including country vital registration (VR) data; international databases that capture several cause-specific fatal discontinuities; and supplemental data in the presence of known issues with data quality or representativeness, or time lags in reporting. A systematic literature review was not used to identify input data for fatal discontinuities, though some literature sources were identified through online supplemental research. Below we provide more detail on the different input data sources by sub-causes of fatal discontinuities.

#### Subnational locations and population splitting

In locations where we produced estimates at the subnational level for GBD 2017, deaths due to all fatal discontinuity causes were assigned to the relevant subnational location(s) when that information could be obtained either through country data sources (eg, VR) or through additional online research. In the rare case that no subnational location could be found, the deaths were split proportionally by population across all subnational locations.

In locations that have experienced boundary changes or split from other locations that we currently estimate (eg, the former Yugoslavia, Czechoslovakia, the Soviet Union, Sudan and South Sudan), we split deaths due to events that occurred prior to boundary changes proportionally based on the populations residing within the boundaries of present-day locations unless we found documentation that clearly indicated whether the event and corresponding deaths occurred in one of the present-day GBD 2017 locations.

### *Choosing between multiple sources for same event*

Where multiple sources reported shock deaths for the same location-year-cause, a cause-specific prioritisation scheme was followed that reflected the available detail in the cause-specific datasets. For example, the Generalized Event Dataset from UCDP was prioritised above all other non-VR sources because it included detail on how deaths were distributed between multiple actors and locations in each conflict event. In most cases, VR from 4- or 5-star locations was used where available. In some cases, VR from 4- or 5-star locations was not chosen if there were well-known data-quality issues or discrepancies in the cause of death data reporting related to a particular event (eg, supplemental death data for Louisiana was used for Hurricane Katrina because of established data reporting issues). The process for prioritisation among various sources for location-year fatal discontinuities is described more in the Modelling strategy below.

Major data sources other than country vital registration for each fatal discontinuity cause follow.

***Conflict and terrorism.*** In GBD 2016, data for conflict and terrorism came from the Uppsala Conflict Data Program (UCDP), International Institute for Strategic Studies, and Robert S. Strauss Center for International Security and Law. For GBD 2017, data from the Global Terrorism Database (GTD), the University of Chicago Suicide Attack Database, and the RAND Database of Worldwide Terrorism Incidents were used in addition to those used in GBD 2016. The table below provides details about the various datasets we utilised from these sources, the dates they were last accessed, and the years for which we used the data provided. Where these data sources reported deaths due to gang violence, the cause was re-mapped to physical violence by other means. Where these data sources reported deaths due to legal intervention, the cause was re-mapped to executions and police conflict.



| Data source name                                                      | Date accessed | Years of data downloaded | Type of data included                                                                                                                                                                                                                                                |
|-----------------------------------------------------------------------|---------------|--------------------------|----------------------------------------------------------------------------------------------------------------------------------------------------------------------------------------------------------------------------------------------------------------------|
| <b>Uppsala Conflict Data Program<sup>1</sup></b>                      |               |                          |                                                                                                                                                                                                                                                                      |
| Georeferenced Event Dataset, Version 17.1                             | 1/16/2018     | 1989-2015                | UCDP battles, non-state, and one-sided conflict deaths with the most disaggregated location information available                                                                                                                                                    |
| PRIO Battles Deaths Dataset, Version 3.1                              | 1/16/2018     | 1970-1988                | Armed conflict (civil wars, etc.)                                                                                                                                                                                                                                    |
| <b>International Institute for Strategic Studies</b>                  |               |                          |                                                                                                                                                                                                                                                                      |
| Armed Conflict Dataset                                                | 11/17/2016    | 1997-2016                | Insurgency, Inter-state, Intra-state conflict deaths                                                                                                                                                                                                                 |
| <b>Robert S. Strauss Center For International Security And Law</b>    |               |                          |                                                                                                                                                                                                                                                                      |
| Armed Conflict Location and Event Dataset (ACLED)                     | 1/16/2018     | 1997-2016                | Actions of opposition groups, governments, and militias in selected locations in Africa, Asia, and the Middle East specifying the exact location and date of battle events, transfers of military control, headquarter establishment, civilian violence, and rioting |
| Social Conflict Analysis Database (SCAD)                              | 1/16/2018     | 1990-2016                | Protests, riots, strikes, inter-communal conflict, government violence against civilians, and other forms of social conflict (covers Africa, Latin America, and Asia)                                                                                                |
| <b>University of Maryland, Global Terrorism Database</b>              |               |                          |                                                                                                                                                                                                                                                                      |
| Global Terrorism Database (GTD)                                       | 1/16/2018     | 1970-2016                | Attacks aimed at attaining political, economic, religious, or social goal, includes evidence of intention to coerce, action was outside precepts of International Humanitarian Law.                                                                                  |
| <b>University of Chicago, Chicago Project on Security and Threats</b> |               |                          |                                                                                                                                                                                                                                                                      |
| Suicide Attack Database (CPOST SAD)                                   | 8/5/2017      | 1974-2016                | Attacks in which an attacker kills him/herself in a deliberate attempt to kill others, includes only attacks perpetrated by non-state actors                                                                                                                         |
| <b>RAND National Security Research Division</b>                       |               |                          |                                                                                                                                                                                                                                                                      |
| RAND Database of Worldwide Terrorism Incidents                        | 9/8/2017      | 1968-2009                | Terrorism, defined by the nature of the act, not by the identity of the perpetrators or the nature of the cause; including violence, calculated to create fear/alarm, intended to coerce certain actions, motive is political, group, or individual                  |

Supplemental online research was conducted for recent conflicts where the databases above were not up to date. In addition, deaths due to conflict and terrorism in Iraq from 2003 to present were estimated using a combination of supplemental sources. The source found with the lowest number of deaths, Iraq Body Count<sup>2</sup>, was used as the lower bound of the uncertainty interval from 2003 to 2016. Estimates from the Iraq Mortality Study by Hagopian et al<sup>3</sup> from 2003 to 2006, the deadliest years of the war, were used to scale deaths to generate the upper uncertainty interval limits using the following formula:

$$deaths_{GBD\ 2017,\ high} = deaths_{IBC} \cdot \left[ \frac{deaths_{IMS}}{deaths_{IBC}} \right]_{2003-2006}$$

We used the average ratio between IMS and IBC reported deaths between 2003 and 2006, multiplied by the number of deaths reported by the IBC. This high estimate was carried forward through 2017 under the assumption that the Iraq Body Count similarly undercounts the number of deaths due to the ongoing civil war in Iraq. The final, best estimate for conflict and terrorism deaths in Iraq from 2003 to 2016 is the midpoint of the high and low estimates given above.

We identified four major conflicts that were not represented in these databases: 1997 civil conflict in Albania<sup>4</sup>; 1971 genocide in Bangladesh<sup>5</sup>; 1972 genocide in Burundi<sup>6</sup>; and 1993 genocide in Burundi<sup>6</sup>. In these cases, we used literature sources in order to account for these fatal discontinuities.

For country-years where multiple sources provided estimates, we prioritised sources in the following order: (1) country VR data, if death estimates were highest of all sources; (2) UCDP; (3) IISS; (4) country VR if death estimates were not the highest of all sources; (5) Robert Strauss Center; (6) Global Terrorism DB; (7) CPOST Suicide Attack Database; (8) online supplemental research.

***Exposure to forces of nature, other injury causes, and protein-energy malnutrition.*** The Centre for Research on the Epidemiology of Disasters' International Disaster Database (EM-DAT) served as the primary non-VR source of fatal discontinuities due to exposure to forces of nature (ie, natural disasters); other transport injuries (eg, plane, train, and boat accidents); poisonings; fire, heat, and hot substances; other exposure to mechanical forces (eg, building collapse); and protein-energy malnutrition (ie, famine or severe drought). Data from EM-DAT were last accessed February 14, 2018. Supplemental online research was conducted for events where EM-DAT was not up to date.

For country-years where multiple sources provided estimates, we prioritised sources in the following order: (1) country VR data, if data quality rating is 4 or 5 stars; (2) country VR data if data quality rating is less than 4 stars and death estimates were highest of all sources; (3) EM-DAT; (4) online supplemental research. Exceptions were made where it was clear that VR systems had been compromised by the event being measured.

***Meningococcal meningitis and diarrhoeal diseases.*** For GBD 2017, we included fatal discontinuities due to a subset of infectious diseases: meningococcal meningitis (or meningococcal infection) and diarrhoeal disease caused by cholera. These two infectious diseases were first included on the fatal discontinuity cause list for GBD 2016 because (1) their current modelling strategies with the Cause of Death Ensemble model (CODEm) do not optimally capture the potentially highly variable – or epidemic – mortality levels and trends characteristic of these two causes; and (2) they can contribute to significant total fatalities in a given location-year. Other infectious diseases for which the latter is true – high death rates in the presence of an outbreak or epidemic – are currently modelled with alternative cause of death methods (eg, natural history models for measles and yellow fever), which allow for greater variation year-over-year if or when outbreaks occur. In future iterations of the GBD, we plan to revisit the inclusion criteria for infectious diseases as fatal discontinuities and develop more of an ensemble approach to modelling causes that can be both endemic (and thus result in more uniform levels and trends over time) and epidemic (and subsequently lead to rapid increases – and decreases – in deaths for a given location-year).

The Global Infectious Diseases and Epidemiology Network (GIDEON) served as the primary data source for collating cholera and meningococcal meningitis or meningococcal infection death reports.<sup>7,8</sup> For any year in which cholera or meningococcal meningitis deaths were recorded in a country or territory

covered by the GBD, we directly extracted reported deaths from 1970 to 2016. When there were reporting gaps in cholera or meningococcal meningitis deaths over this period of time and the World Health Organization (WHO) annual cholera or meningitis reports had death reports for those years, we used the WHO reports. The primary exception were two major cholera outbreaks in Bangladesh – 1982 to 1983 and 1991 – which were not captured by either GIDEON or WHO. As result, we used the EM-DAT records for the 1982–1983 outbreak and literature for the 1991 outbreak.<sup>9</sup> For the Yemen Cholera outbreak in 2016 and 2017, we used estimates from local collaborators in the absence of other data sources.

**Ebola.** Since GBD 2015, outbreaks due to Ebola virus disease have been estimated using the data and methods described in the Ebola write-up of this appendix and included in GBD death estimates in the same way as other fatal discontinuity causes.

### Modelling strategy

All input data for fatal discontinuity causes were run through the causes of death data formatting and mapping process.

#### *VR de-duplication*

For injury causes that also have continuous background mortality and a CODEm model, a process was established to avoid duplication of fatal discontinuity deaths in the two models. First, location-years with fatal discontinuities data from non-VR sources were identified. If these location-cause-years also had VR death estimates that were greater than 40% higher than the immediately surrounding years and could be linked to a specific fatal discontinuity event, these years were marked as outliers in the VR data and the difference between the outlier year and the average of the surrounding years was included in the relevant cause in the fatal discontinuities database. The deaths from the identified events were subtracted from the all-cause VR estimates used in the all-cause mortality estimation process.

#### *Uncertainty analysis for input and draw-level input to age-sex splitting*

Uncertainty intervals for deaths due to conflict and terrorism were generated using UCDP high and low death estimates, except in the case of Iraq 2003–2016, as explained above. In cases where low and high estimates were not included in the available data, the regional average uncertainty interval was applied to the available death estimate across all fatal discontinuity causes.

We assumed a log-normal distribution using mean death rates and standard error based on high and low estimates. In the case that standard error was less than  $10e-8$ , the draws were set equal to the mean rate. 1,000 draws were sampled from this log-normal distribution. These 1,000 draws were then converted back to count space and used for final calculations of means and uncertainty intervals.

#### *Age-sex splitting*

All compiled data were run through the causes of death age-sex splitting process, except for where we had strong supplemental information on the age distribution of specific, large events, such as United States mortality in the Vietnam War and Iranian mortality from the Iran-Iraq conflict in the early 1980s.

#### *Changes from GBD 2016*

GBD 2017 saw an effort to systematise the collection of up-to-date fatal discontinuity data through supplemental online research. New tools included use of Twitter to identify events not covered by other sources, most notably in identifying events that occurred recently (2016, 2017). This process resulted in a more comprehensive set of conflict and terrorism data for 2017, as well as large natural disasters not contained in EM-DAT or VR.

For GBD 2017, efforts were also made to improve location tagging in raw data to the GBD location hierarchy using several approaches. Identifying the correct GBD location for each event is difficult, as reports of fatal discontinuities come in many formats, often with limited metadata. The approaches used for improving the location tagging included a) utilising the collaborator network to more accurately tag events to subnational locations when information in the data was scarce, b) automated matching with GBD location names, c) overlaying a spatial file of the most-detailed GBD geographies, d) geo-coding using precise place names, and e) for events spanning multiple GBD locations, but without detail in the raw data, deaths were split using population.

We completed a detailed review of the fatal discontinuity cause mappings for conflict and terrorism, police conflict and executions, using the text descriptions of each event when provided in the data. This exercise resulted in updating the GBD cause assigned for a number of events present in the GBD 2016 analysis, which is one contributor in the differences seen in the GBD 2016 and GBD 2017 fatal discontinuity estimates.

## References

- 1 UCDP/PRIO Armed Conflict Dataset Codebook. Uppsala Conflict Data Program (UCDP); Centre for the Study of Civil Wars, International Peace Research Institute, Oslo (PRIO), 2013.
- 2 Iraq Body Count. <https://www.iraqbodycount.org/database/> (accessed May 8, 2017).
- 3 Hagopian A, Flaxman AD, Takaro TK, *et al.* Mortality in Iraq Associated with the 2003–2011 War and Occupation: Findings from a National Cluster Sample Survey by the University Collaborative Iraq Mortality Study. *PLOS Medicine* 2013; **10**: e1001533.
- 4 Jarvis C. The Rise and Fall of Albania's Pyramid Schemes. *F&D* 2000; **37**.  
<http://www.imf.org/external/pubs/ft/fandd/2000/03/jarvis.htm>.
- 5 Obermeyer Z, Murray CJL, Gakidou E. Fifty years of violent war deaths from Vietnam to Bosnia: analysis of data from the world health survey programme. *BMJ* 2008; **336**: 1482–6.
- 6 Milton L. Rwanda, 1994: International incompetence produces genocide. 1994  
<https://ezproxy.uwc.edu/login?url=http://search.proquest.com/docview/234405747?accountid=4241>  
1.
- 7 Inc GI, Berger DS. Cholera: Global Status: 2017 edition. GIDEON Informatics Inc, 2017.
- 8 Inc GI, Berger DS. Bacterial Meningitis: Global Status: 2017 edition. GIDEON Informatics Inc, 2017.
- 9 Siddique A, Zaman K, Baqui A, *et al.* Cholera Epidemics in Bangladesh: 1985–1991. *Journal of Diarrhoeal Diseases Research* 1992; **10**: 79–86.

## Section 4: Central computation

### Section 4.1: Imported cases

Imported cases are fatalities that occur in a geographic area where a particular CoD is known to be eradicated in a specific time period or where infection cannot occur. We apply space-time restrictions to these causes in the modeling strategy for that location and time period. However, in some rare cases, there are deaths from these causes outside of restricted locations and time periods. These deaths are referred to as Imported Cases.

Illustrating this concept, Chagas Disease is transmitted by insect vectors that only exist in the Americas. For this reason, Chagas Disease is restricted in the models for countries such as Russia. However, it is possible that someone traveling in Latin America could contract Chagas Disease and then die after returning home to Russia. Imported cases accounts for these kinds of deaths.

To calculate these Imported cases, we find all cases from the VRs of data-rich countries for any CoD that is otherwise geographically or temporally restricted. We then create a beta distribution from that data point, using the sample size of the VR for that data point, and upload these draws as a custom CoD model. This model is then used as an input to CoDCorrect.

### Section 4.2: CodCorrect

#### Section 4.2.1: Objective of CodCorrect

As mentioned in the main text, the CoD models are cause-specific. As such, there is no guarantee that the sum of these models will equal the results of the all-cause mortality estimates or that model results of child causes add up to the parent model results. The CoDCorrect process is used to make the CoD and all-cause mortality estimates internally consistent using a very simple algorithm.

#### Section 4.2.2: Algorithm and levels

The core algorithm remains the same as it did in GBD 2013. The equation can be written as follows:

$$CD_{lyasjd} = D_{lyasjd} \left( \frac{PD_{lyasjd}}{\sum_{j=1}^k D_{lyasjd}} \right)$$

Where:

$CD_{lyasjd}$  is the corrected number of deaths for a location  $l$ , year  $y$ , age  $a$ , sex  $s$ , cause  $j$ , and draw  $d$

$PD_{lyasjd}$  is the parent cause deaths for a location  $l$ , year  $y$ , age  $a$ , sex  $s$ , cause  $j$ , and draw  $d$

$D_{lyasjd}$  is the uncorrected number of deaths estimated from a cause-specific model for a  $l$ , year  $y$ , age  $a$ , sex  $s$ , cause  $j$ , and draw  $d$

The CoDCorrect process starts by rescaling the Level 1 causes to match the all-cause mortality estimates (which is used for  $PD_{lyasjd}$  in the above equation). Level 2 causes are then rescaled to their corrected parent causes. This continues until all levels of the hierarchy have been rescaled. Causes and their levels within the CoDCorrect hierarchy can be found in Appendix Table 14.

Unlike in GBD 2013, HIV is not included in the CoDCorrect process for GBD 2017. To account for this change, Level 1 CoDCorrect causes are rescaled to HIV-deleted mortality estimates which are produced as part of the mortality and HIV estimation process. Results from the GBD version of Spectrum are added to the post-CoDCorrect death estimates, along with fatal discontinuities and imported cases, to generate the full set of death estimates.

### Section 4.2.3: Diagnostic results of CodCorrect by cause and location

For more detail on diagnostic results of CodCorrect by cause see Appendix Table 15.

### Section 4.3: Years of life lost (YLLs) calculation

Years of life lost due to premature mortality (YLLs) were computed for 918 locations and 37 years. First, we used the lowest observed age-specific mortality rates by location and sex across all estimation years from locations with total populations greater than 5 million in 2016 to establish a theoretical minimum risk reference life table. The values can be found in Appendix Table 16.

The YLL is a metric that is computed by multiplying the number of estimated deaths by the standard life expectancy at age of death. The metric therefore highlights premature deaths by applying a larger weight to deaths that occur at younger age groups. We propagated uncertainty from CoDCorrected deaths for all demographics. The core equation can be written as follows:

$$YLL = \sum_{c=1, a=0, s=1}^{\infty} d_{cas} e_a$$

#### Section 4.3.1: GBD world population age standard

Age-standardized populations in the GBD were calculated using the GBD world population age standard. For GBD 2013, GBD 2015 and GBD 2016, the age-specific proportional distributions of all national locations from the UNPOP World Population Prospects 2012 revision for all years from 2010 to 2035 were used to generate a standard population age structure using the non-weighted mean across all the aforementioned country-years. For GBD 2017 we have used the non-weighted mean of 2017 age-specific proportional distributions from the GBD 2017 population estimates for all national locations with a population greater than 5 million people in 2017 to generate an updated standard population age structure.<sup>30</sup> The values used for the age standard are found in Appendix Table 17.

## Section 5: SDI Analysis

### Section 5.1: SDI definition

The Socio-demographic Index (SDI) is a composite indicator of development status strongly correlated with health outcomes. In short, it is the geometric mean of 0 to 1 indices of total fertility rate under the age of 25 (TFU25), mean education for those aged 15 and older (EDU15+), and lag distributed income (LDI) per capita.

### Section 5.2: Development of revised SDI indicator

SDI was originally constructed for GBD 2015 using the Human Development Index (HDI) methodology, wherein a 0 to 1 index value was determined for each of the original three covariate inputs (TFR in ages 15 to 49, EDU15+, and LDI per capita) using the observed minima and maxima over the estimation period to set the scales.<sup>31</sup>

In response to feedback from collaborators and the evolution of the GBD, we have refined the indicator with each GBD cycle. For GBD 2017, in conjunction with our expanded estimation of age-specific fertility, we replaced TFR with TFU25 as one of the three component indices. The TFU25 provides a better measure of women's status in society, as it focuses on ages where childbearing disrupts the pursuit of education and entrance into the workforce. In addition, we observe that in highly developed countries the TFU25 has tended to decline consistently over time, even amidst rebounds in TFR driven by increasing fertility in older ages. The concordance correlation coefficient between SDI using the GBD 2016 method and the updated method for GBD 2017 was 0.981.

During GBD 2016 we moved from using relative index scales to absolute scales to enhance the stability of SDI's interpretation over time, as we noticed that the measure was highly sensitive to the addition of subnational units that tended to stretch the empirical minima and maxima.<sup>32</sup> We selected the minima and maxima of the scales by examining the relationships each of the inputs had with life expectancy at birth and under-5 mortality and identifying points of limiting returns at both high and low values, if they occurred prior to theoretical limits (e.g., a TFU25 of 0).

Thus, an index score of 0 represents the minimum level of each covariate input past which selected health outcomes can get no worse, while an index score of 1 represents the maximum level of each covariate input past which selected health outcomes cease to improve. As a composite, a location with an SDI of 0 would have a theoretical minimum level of development relevant to these health outcomes, while a location with an SDI of 1 would have a theoretical maximum level of development relevant to these health outcomes.

We summarize the final scales for GBD 2017 in the table below.

| Input          | Lower Bound                         | Upper Bound                |
|----------------|-------------------------------------|----------------------------|
| TFU25          | 0                                   | 3                          |
| LDI per capita | 250 USD (5.52 log USD) <sup>b</sup> | 60,000 USD (11.00 log USD) |

---

EDU15+

0 years

17 years

---

<sup>b</sup> The minimum for the LDI scale was originally set at the theoretical limit of 0 USD, as we did not observe an asymptotic relationship between  $\log(\text{LDI})$  and  $E_0$  or  $5q_0$  at lower values of  $\log(\text{LDI})$ . Empirically, however, we also did not observe an LDI below 350 USD (5.86 log USD) for the estimation period 1970-2016. In log-space, this meant that approximately half of our scale was not being utilized, compressing the observed variation in LDI and diminishing its meaningful contribution to SDI. Accordingly, we set the lower limit on LDI to 250 USD (5.52 log USD) to ensure we were fully utilizing the range of the scale to capture its variation across space and time, as is the case with the other two inputs.

Using scales described above, we computed the index scores underlying SDI as follows:

$$I_{cly} = \frac{(C_{ly} - C_{low})}{(C_{high} - C_{low})}$$

Where  $I_{cly}$  – the index for covariate  $C$ , location  $l$ , and year  $y$  – is equal to the difference between the value of that covariate in that location-year and the lower bound of the covariate divided by the difference between the upper and lower bounds for that covariate. If the values of input covariates fell outside the upper or lower bounds (e.g. LDI per capita greater than 60,000 USD), they were mapped to the respective upper or lower bounds. We also note that the index value for TFU25 was computed as  $1 - I_{TFU25ly}$ , as lower TFU25s correspond to higher levels of development, and thus higher index scores. For GBD 2017 we expanded the computation of SDI to 890 national and subnational locations spanning the time period 1950-2017.

The composite Socio-demographic Index is the geometric mean of these three indices for a given location-year. The cutoff values used to determine quintiles for analysis were then computed using country-level estimates of SDI for the year 2017, excluding countries with populations less than 1 million. SDI groupings by geography are provided in Appendix Table 19, SDI values by location are provided in Appendix Table 20, and SDI R-squared values with lags up to 10 years are provided in Appendix Table 18.

### Example Calculation

Below we present the calculation of SDI for a hypothetical country in the year 2010:

$$TFU25 = 1.09; \text{ Mean educ yrs pc} = 8.23; \ln LDI = 9.60$$

$$I_{TFU25} = 1 - \frac{1.09 - 0}{3 - 0} = .637$$

$$I_{Educ} = \frac{8.23 - 0}{17 - 0} = .484$$

$$I_{\ln LDI} = \frac{9.60 - 5.52}{11.00 - 5.52} = .744$$

$$SDI = \sqrt[3]{I_{TFU25} * I_{Educ} * I_{\ln LDI}} = \sqrt[3]{.637 * .484 * .744} = .611$$



$$I_{\ln LDI} = \frac{9.58 - 5.52}{11.00 - 5.52} = .741$$

$$SDI = \sqrt[3]{I_{TFR} * I_{Educ} * I_{\ln LDI}} = \sqrt[3]{.855 * .543 * .741} = .701$$

## Section 6: References

- 1 Office of the Registrar General and Census Commissioner. India Special Survey of Deaths. India, 2004.
- 2 GBD 2016 Mortality Collaborators. Global, regional, and national under-5 mortality, adult mortality, age-specific mortality, and life expectancy, 1970-2016: a systematic analysis for the Global Burden of Disease Study 2016. *Lancet Rev* 2017.
- 3 Office of the Registrar General and Census Commissioner. India Medical Certification of Cause of Death Reports 1990-2010. India, 2014.
- 4 Office of the Registrar General and Census Commissioner. India Medical Certification of Cause of Death Reports 1980-1986. India.
- 5 Todd S, Barr S, Passmore AP. Cause of death in Alzheimer's disease: a cohort study. *QJM Mon J Assoc Physicians* 2013; **106**: 747–53.
- 6 Brunnström HR, Englund EM. Cause of death in patients with dementia disorders. *Eur J Neurol* 2009; **16**: 488–92.
- 7 Keene J, Hope T, Fairburn CG, Jacoby R. Death and dementia. *Int J Geriatr Psychiatry* 2001; **16**: 969–74.
- 8 Thomas BM, Starr JM, Whalley LJ. Death certification in treated cases of presenile Alzheimer's disease and vascular dementia in Scotland. *Age Ageing* 1997; **26**: 401–6.
- 9 Naghavi M, Makela S, Foreman K, O'Brien J, Pourmalek F, Lozano R. Algorithms for enhancing public health utility of national causes-of-death data. *Popul Health Metr* 2010; **8**: 9.
- 10 Ahern RM, Lozano R, Naghavi M, Foreman K, Gakidou E, Murray CJ. Improving the public health utility of global cardiovascular mortality data: the rise of ischemic heart disease. *Popul Health Metr* 2011; **9**: 8.
- 11 Barker B, Degenhardt L, National Drug and Alcohol Research Centre (Australia). Accidental drug-induced deaths in Australia 1997-2001. Sydney, Australia: National Drug and Alcohol Research Centre, University of New South Wales, 2003.
- 12 Roxburgh A, Burns L. Accidental drug-induced deaths due to opioids in Australia, 2011. Sydney, Australia: National Drug and Alcohol Research Centre, University of New South Wales, 2015.

- 13 Roxburgh A, Burns L. Cocaine and methamphetamine related drug-induced deaths in Australia, 2011. Sydney, Australia: National Drug and Alcohol Research Centre, University of New South Wales, 2015.
- 14 Naghavi M, Wang H, Lozano R, *et al.* Global, regional, and national age-sex specific all-cause and cause-specific mortality for 240 causes of death, 1990–2013: a systematic analysis for the Global Burden of Disease Study 2013. *The Lancet* 2015; **385**: 117–71.
- 15 Lozano R, Naghavi M, Foreman K, *et al.* Global and regional mortality from 235 causes of death for 20 age groups in 1990 and 2010: a systematic analysis for the Global Burden of Disease Study 2010. *The Lancet* 2012; **380**: 2095–128.
- 16 Calvert C, Ronsmans C. The contribution of HIV to pregnancy-related mortality: a systematic review and meta-analysis. *AIDS Lond Engl* 2013; **27**: 1631–9.
- 17 Figueroa-Damián R. [Pregnancy outcome in women infected with the human immunodeficiency virus]. *Salud Publica Mex* 1999; **41**: 362–7.
- 18 Ryder RW, Nsuami M, Nsa W, *et al.* Mortality in HIV-1-seropositive women, their spouses and their newly born children during 36 months of follow-up in Kinshasa, Zaïre. *AIDS Lond Engl* 1994; **8**: 667–72.
- 19 Zvandasara P, Saungweme G, Mlambo JT, Moyo J. Post Caesarean section infective morbidity in HIV-positive women at a tertiary training hospital in Zimbabwe. *Cent Afr J Med* 2007; **53**: 43–7.
- 20 Chilongozi D, Wang L, Brown L, *et al.* Morbidity and mortality among a cohort of human immunodeficiency virus type 1-infected and uninfected pregnant women and their infants from Malawi, Zambia, and Tanzania. *Pediatr Infect Dis J* 2008; **27**: 808–14.
- 21 Leroy V, Ladner J, Nyiraziraje M, *et al.* Effect of HIV-1 infection on pregnancy outcome in women in Kigali, Rwanda, 1992-1994. Pregnancy and HIV Study Group. *AIDS Lond Engl* 1998; **12**: 643–50.
- 22 Kourtis AP, Bansil P, McPheeters M, Meikle SF, Posner SF, Jamieson DJ. Hospitalizations of pregnant HIV-infected women in the USA prior to and during the era of HAART, 1994-2003. *AIDS Lond Engl* 2006; **20**: 1823–31.
- 23 Ticconi C, Mapfumo M, Dorrucchi M, *et al.* Effect of maternal HIV and malaria infection on pregnancy and perinatal outcome in Zimbabwe. *J Acquir Immune Defic Syndr* 1999 2003; **34**: 289–94.
- 24 DerSimonian R, Laird N. Meta-analysis in clinical trials. *Control Clin Trials* 1986; **7**: 177–88.
- 25 Lozano R, Lopez AD, Atkinson C, Naghavi M, Flaxman AD, Murray CJ. Performance of physician-certified verbal autopsies: multisite validation study using clinical diagnostic gold standards. *Popul Health Metr* 2011; **9**: 32.
- 26 Foreman KJ, Lozano R, Lopez AD, Murray CJ. Modeling causes of death: an integrated approach using CODEm. *Popul Health Metr* 2012; **10**: 1.
- 27 Bell RM, Koren Y. Lessons from the Netflix Prize Challenge. *SIGKDD Explor News* 2007; **9**: 75–79.

- 28 Bell RM, Koren Y, Volinsky C. All together now: A perspective on the NETFLIX PRIZE. *CHANCE* 2010; **23**: 24–24.
- 29 Flaxman AD, Vos T, Murray CJL, editors. An Integrative MetaRegression Framework for Descriptive Epidemiology, 1 edition. Seattle: University of Washington Press, 2015.
- 30 GBD 2017 Population and Fertility collaborators. Population and fertility by age and sex for 195 countries and territories 1950-2017: a systematic analysis for the Global Burden of Disease 2017. *The Lancet* in review.
- 31 Wang H, Naghavi M, Allen C, *et al.* Global, regional, and national life expectancy, all-cause mortality, and cause-specific mortality for 249 causes of death, 1980–2015: a systematic analysis for the Global Burden of Disease Study 2015. *The Lancet* 2016; **388**: 1459–544.
- 32 Wang H, Abajobir AA, Abate KH, *et al.* Global, regional, and national under-5 mortality, adult mortality, age-specific mortality, and life expectancy, 1970–2016: a systematic analysis for the Global Burden of Disease Study 2016. *The Lancet* 2017; **390**: 1084–150.

**Appendix Figure 1. Analytical flowchart for the development of the GBD 2017 cause of death database (A) and different strategies used to model different causes (B) and ultimately combine them into a consistent set of cause-specific deaths for each location, age, sex, and year.**

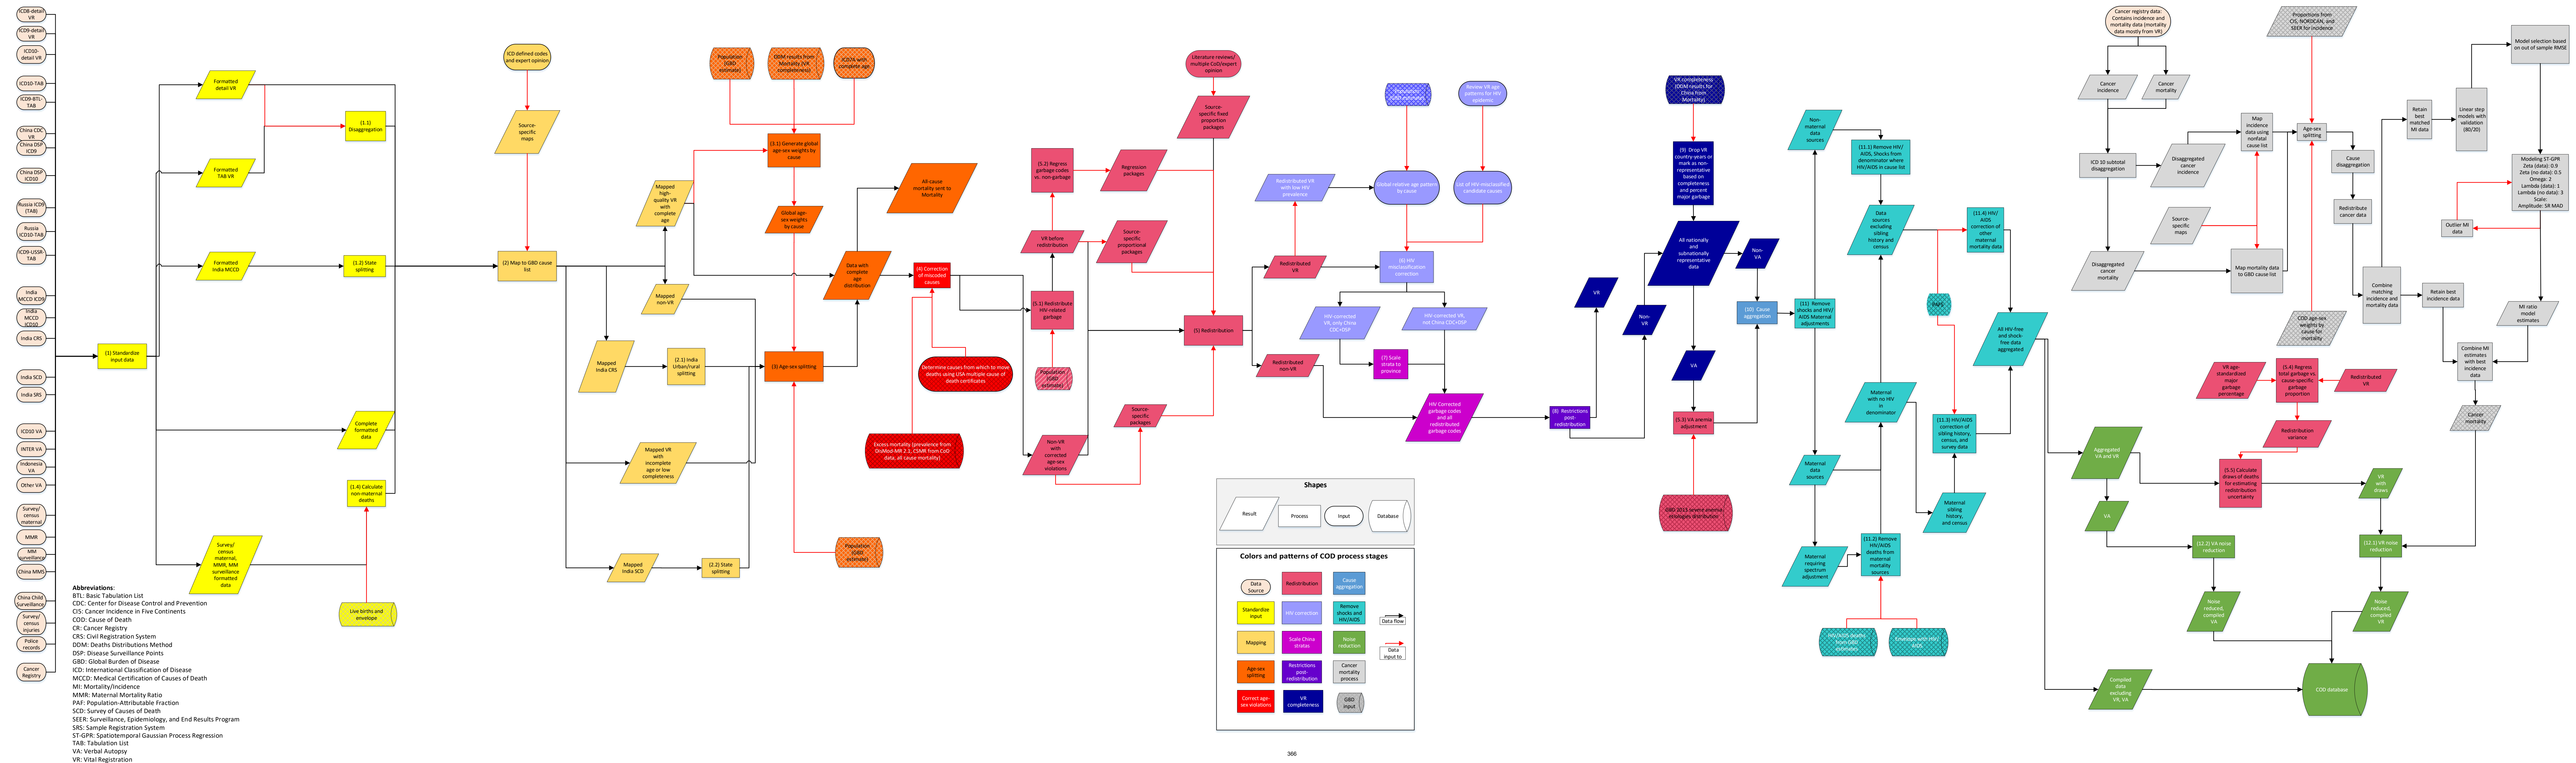

Appendix Figure 2. GBD 2017 Causes of death estimation flowchart by modeling group

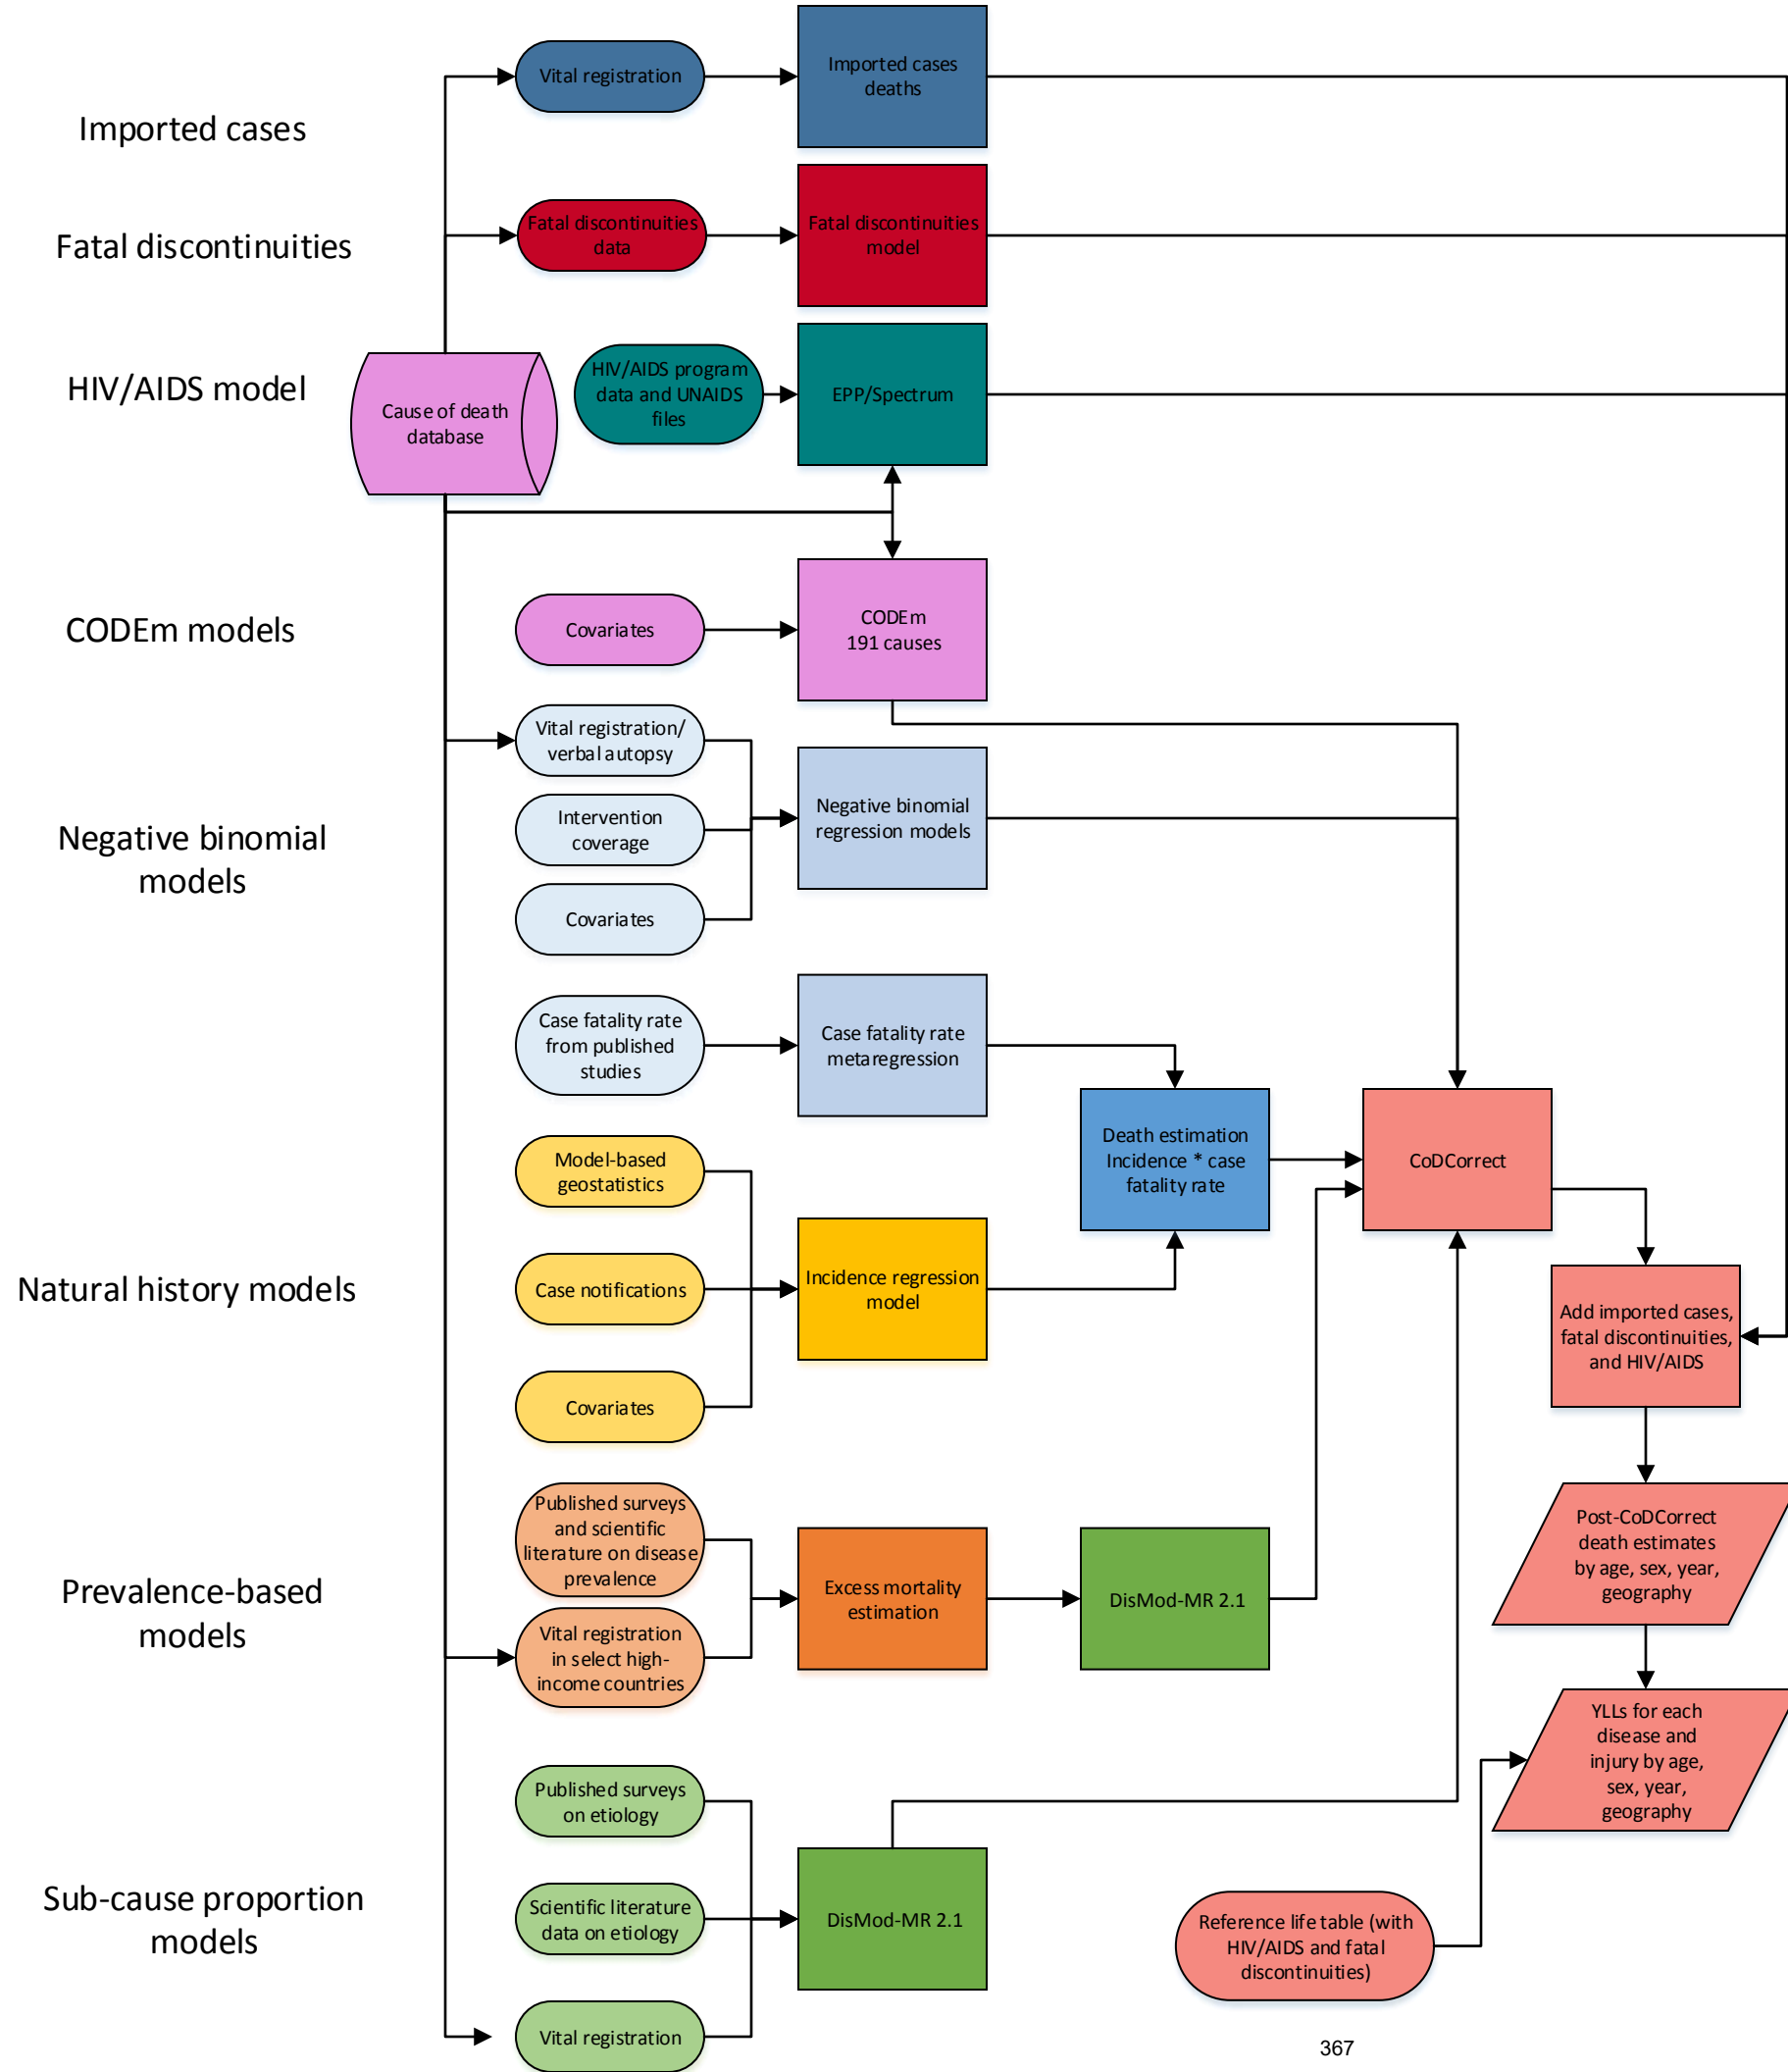

**Abbreviations:**  
 CODEm: Cause of death ensemble model  
 GBD: Global Burden of Disease  
 YLL: years of life lost



Appendix Figure 3. Vital Registration and Verbal Autopsy data availability by country, 1980–2017

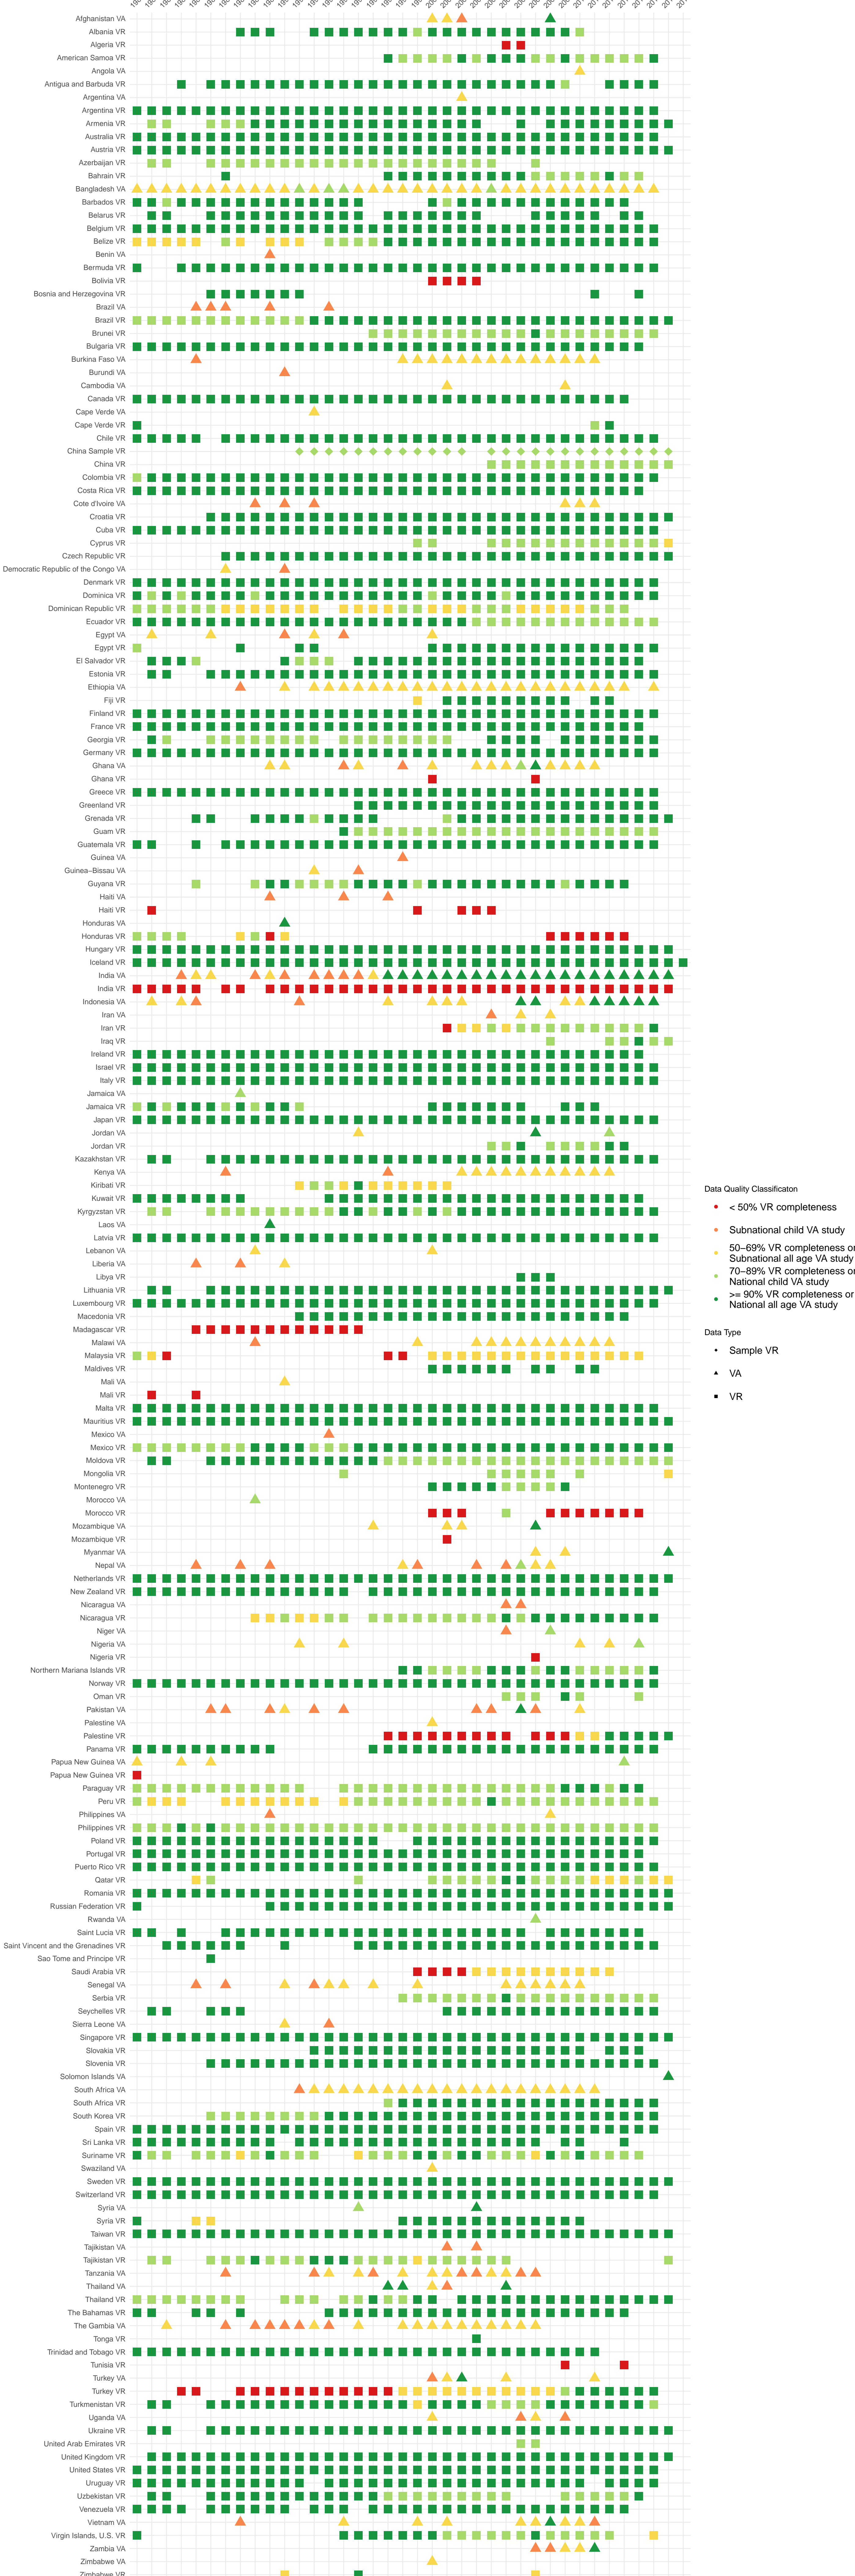







Appendix Figure 5A: Classification of national time series of vital registration and verbal autopsy data 1980–2017

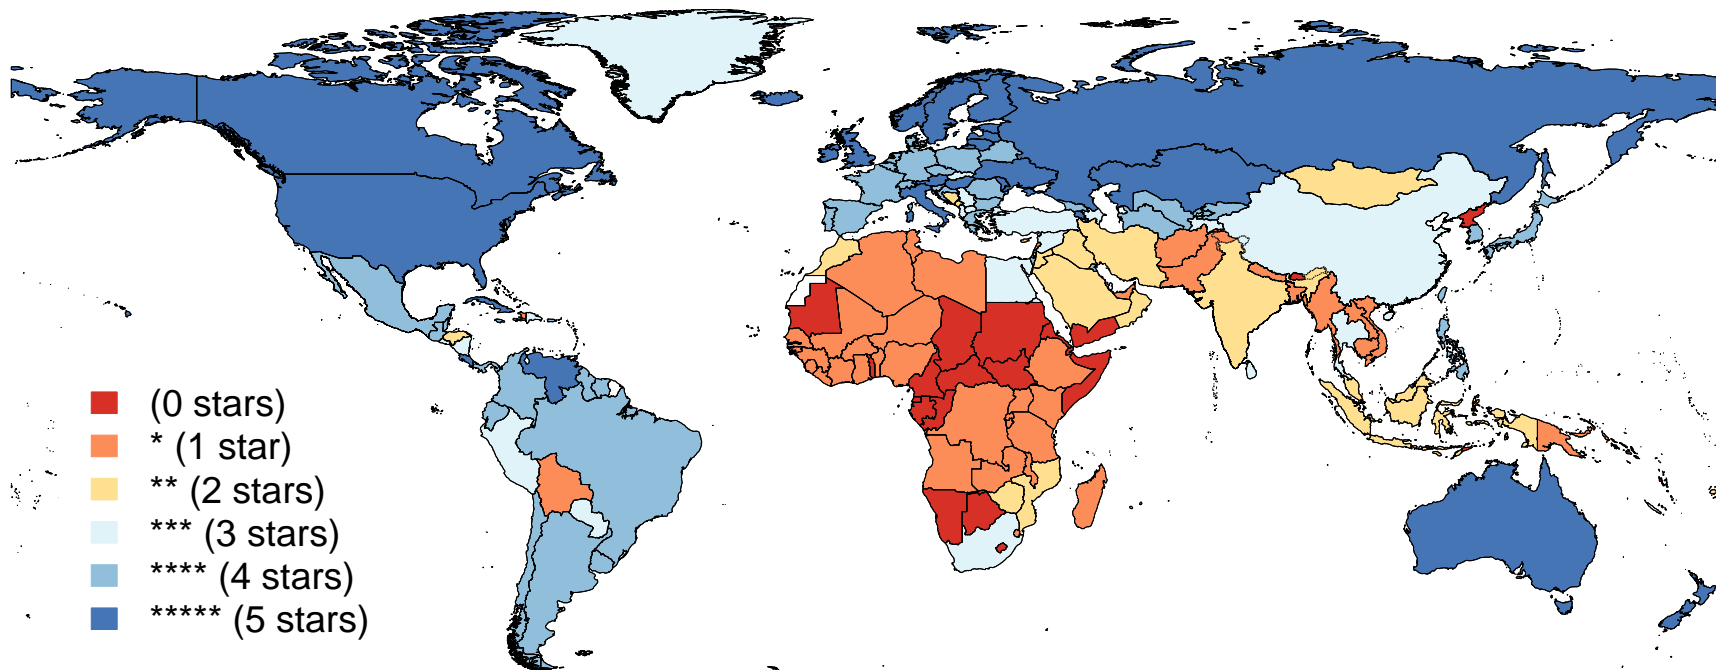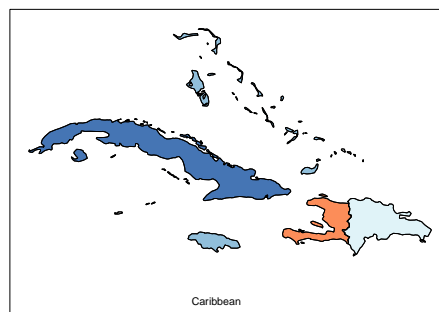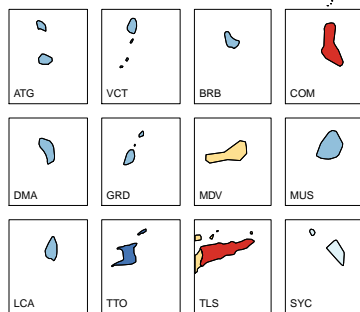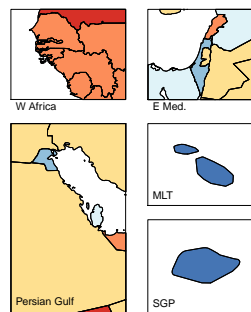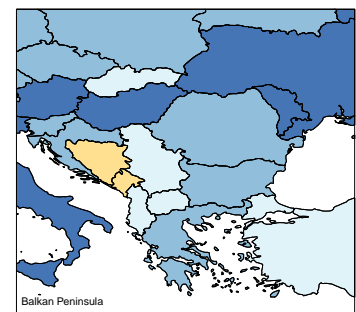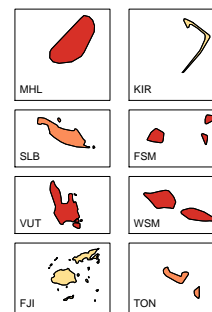

Appendix Figure 5B: Classification of national time series of vital registration and verbal autopsy data 2010–2017

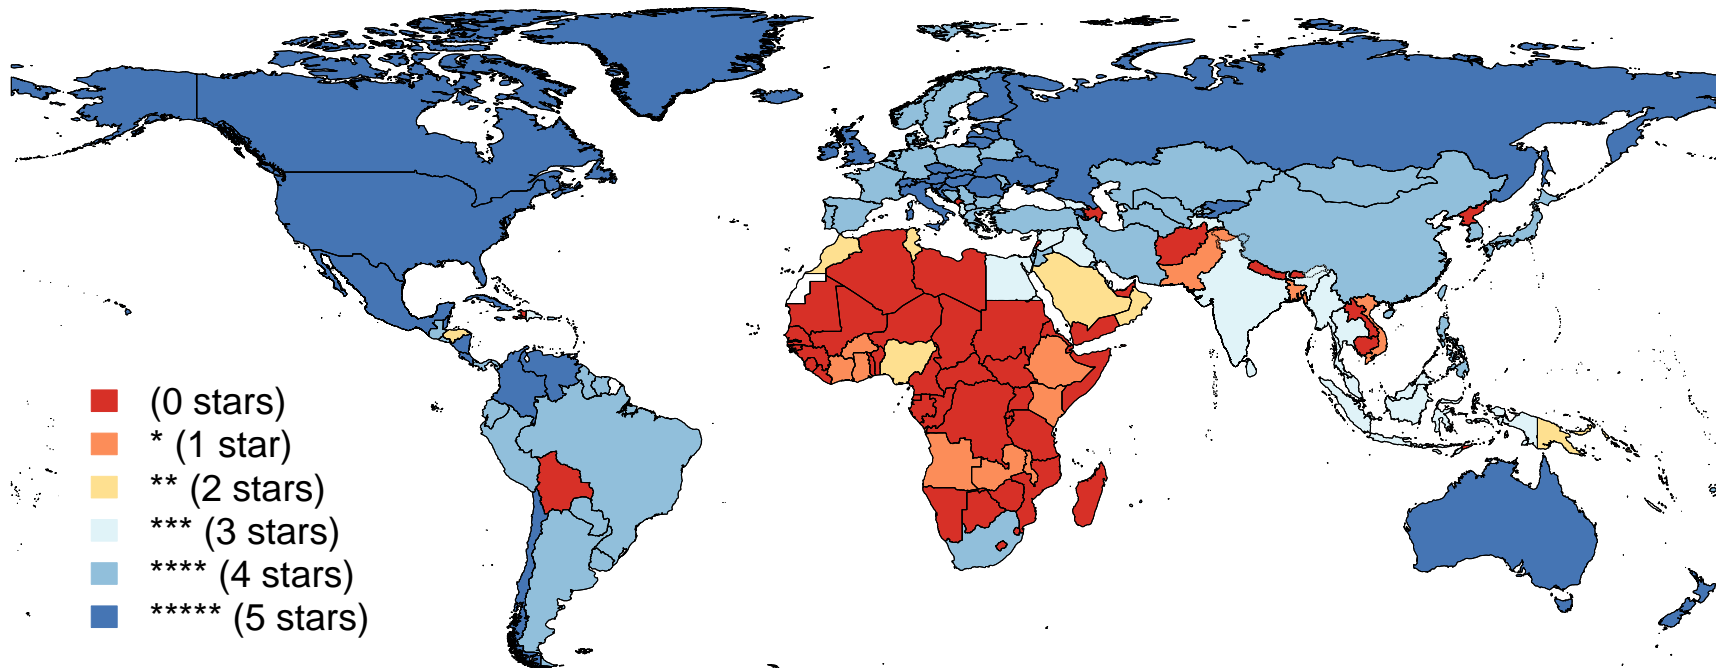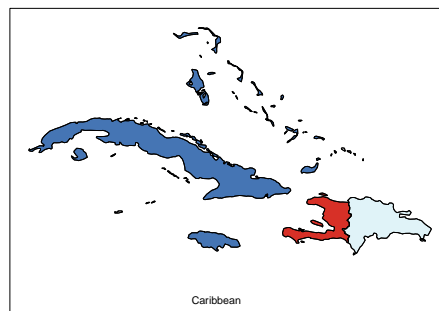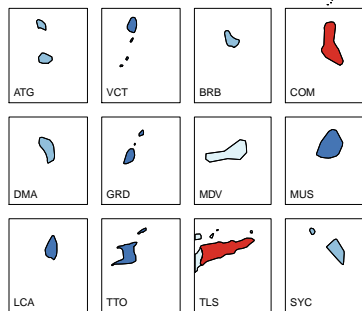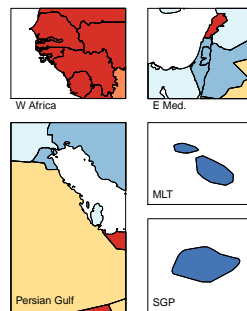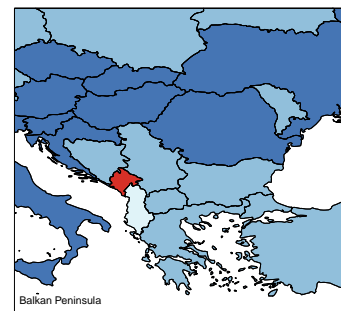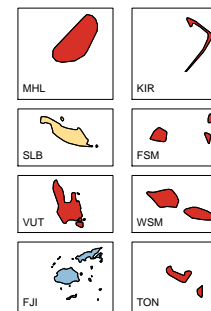

Appendix Figure 6a. Recoding of Alzheimer's disease and other dementias – Sweden

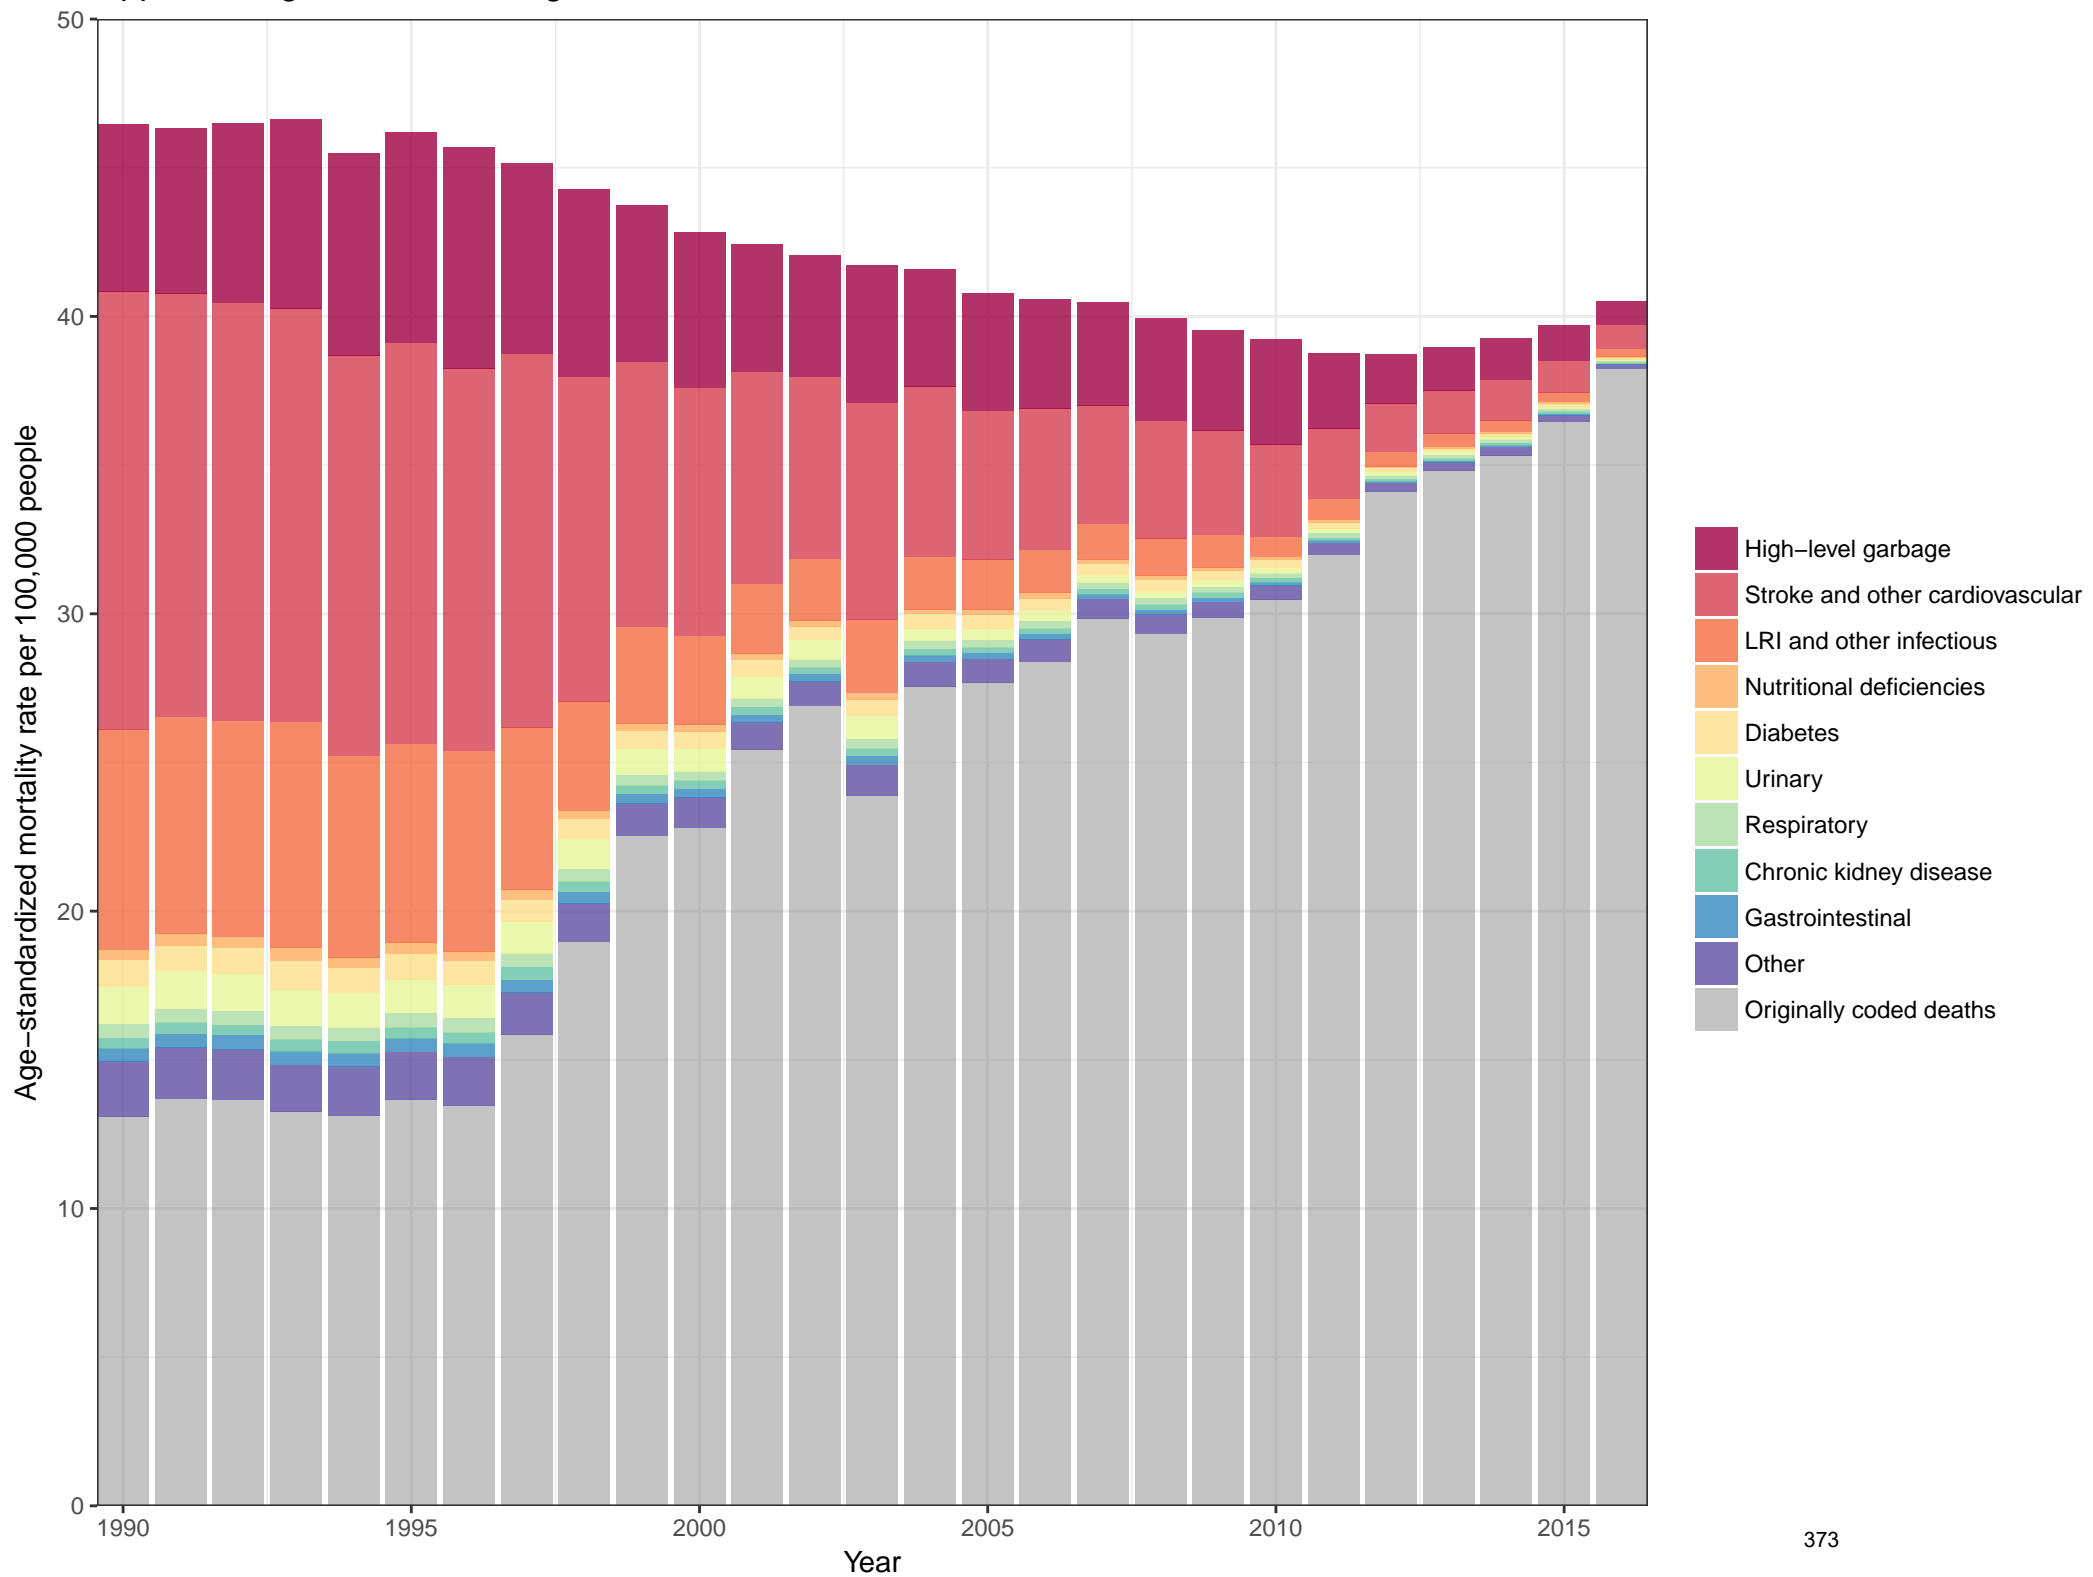

Appendix Figure 6a. Recoding of Alzheimer's disease and other dementias – Mexico

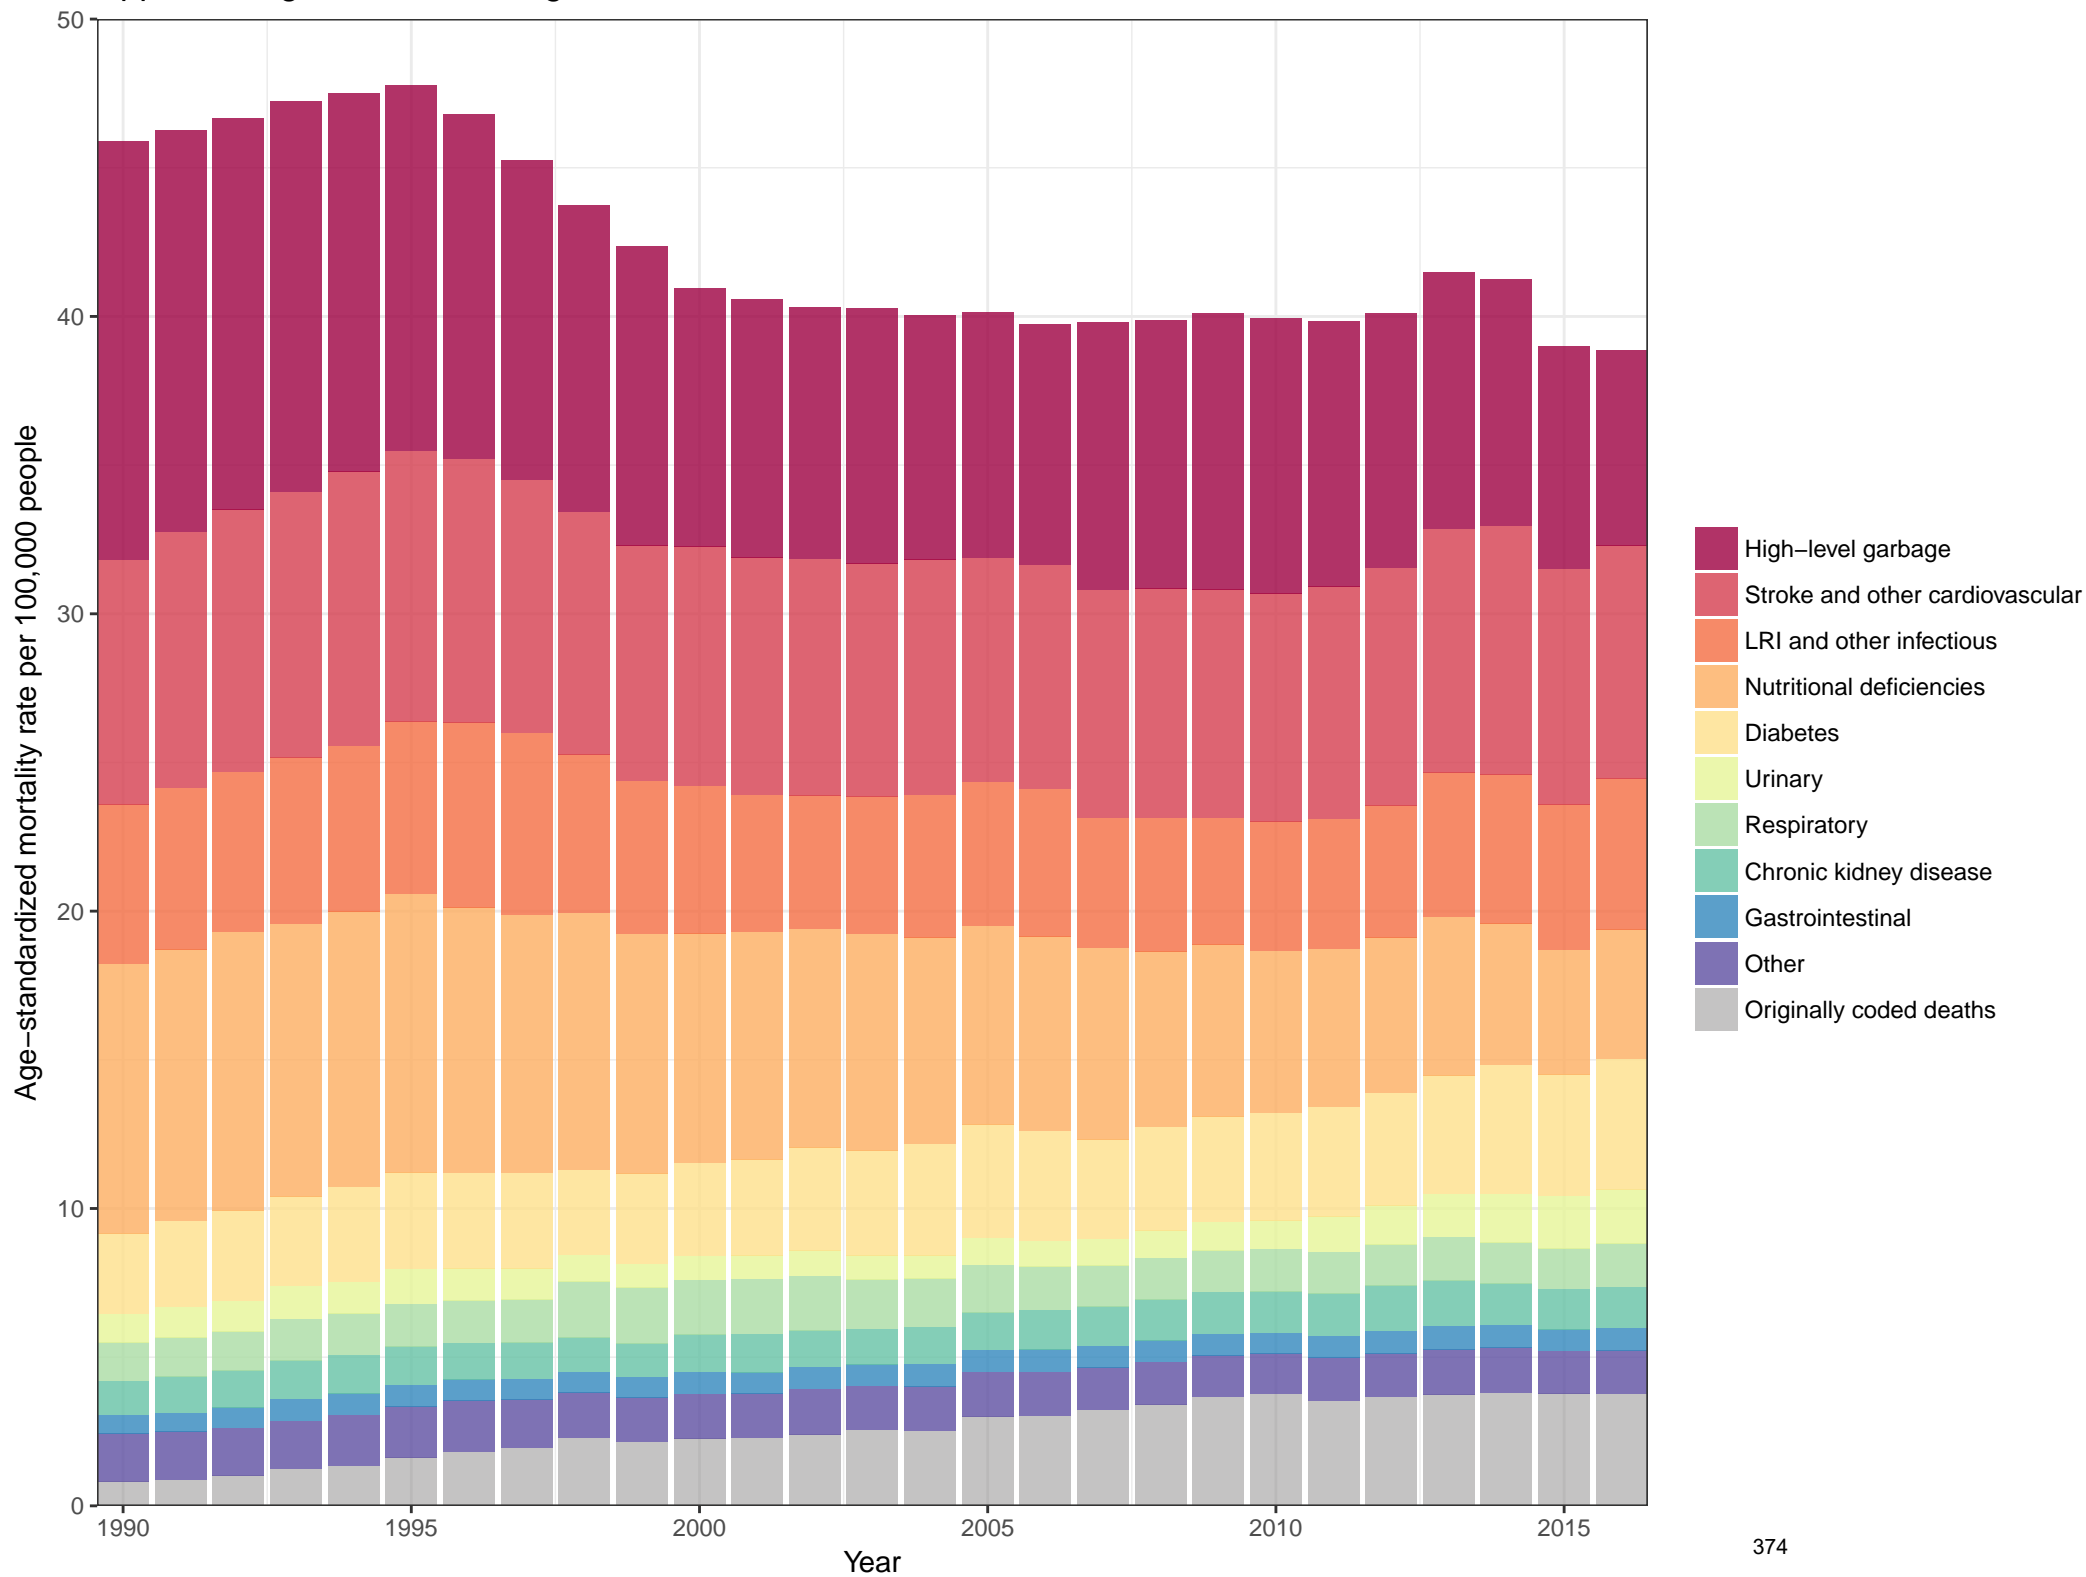

Appendix Figure 6b. Recoding of Parkinson's disease – Sweden

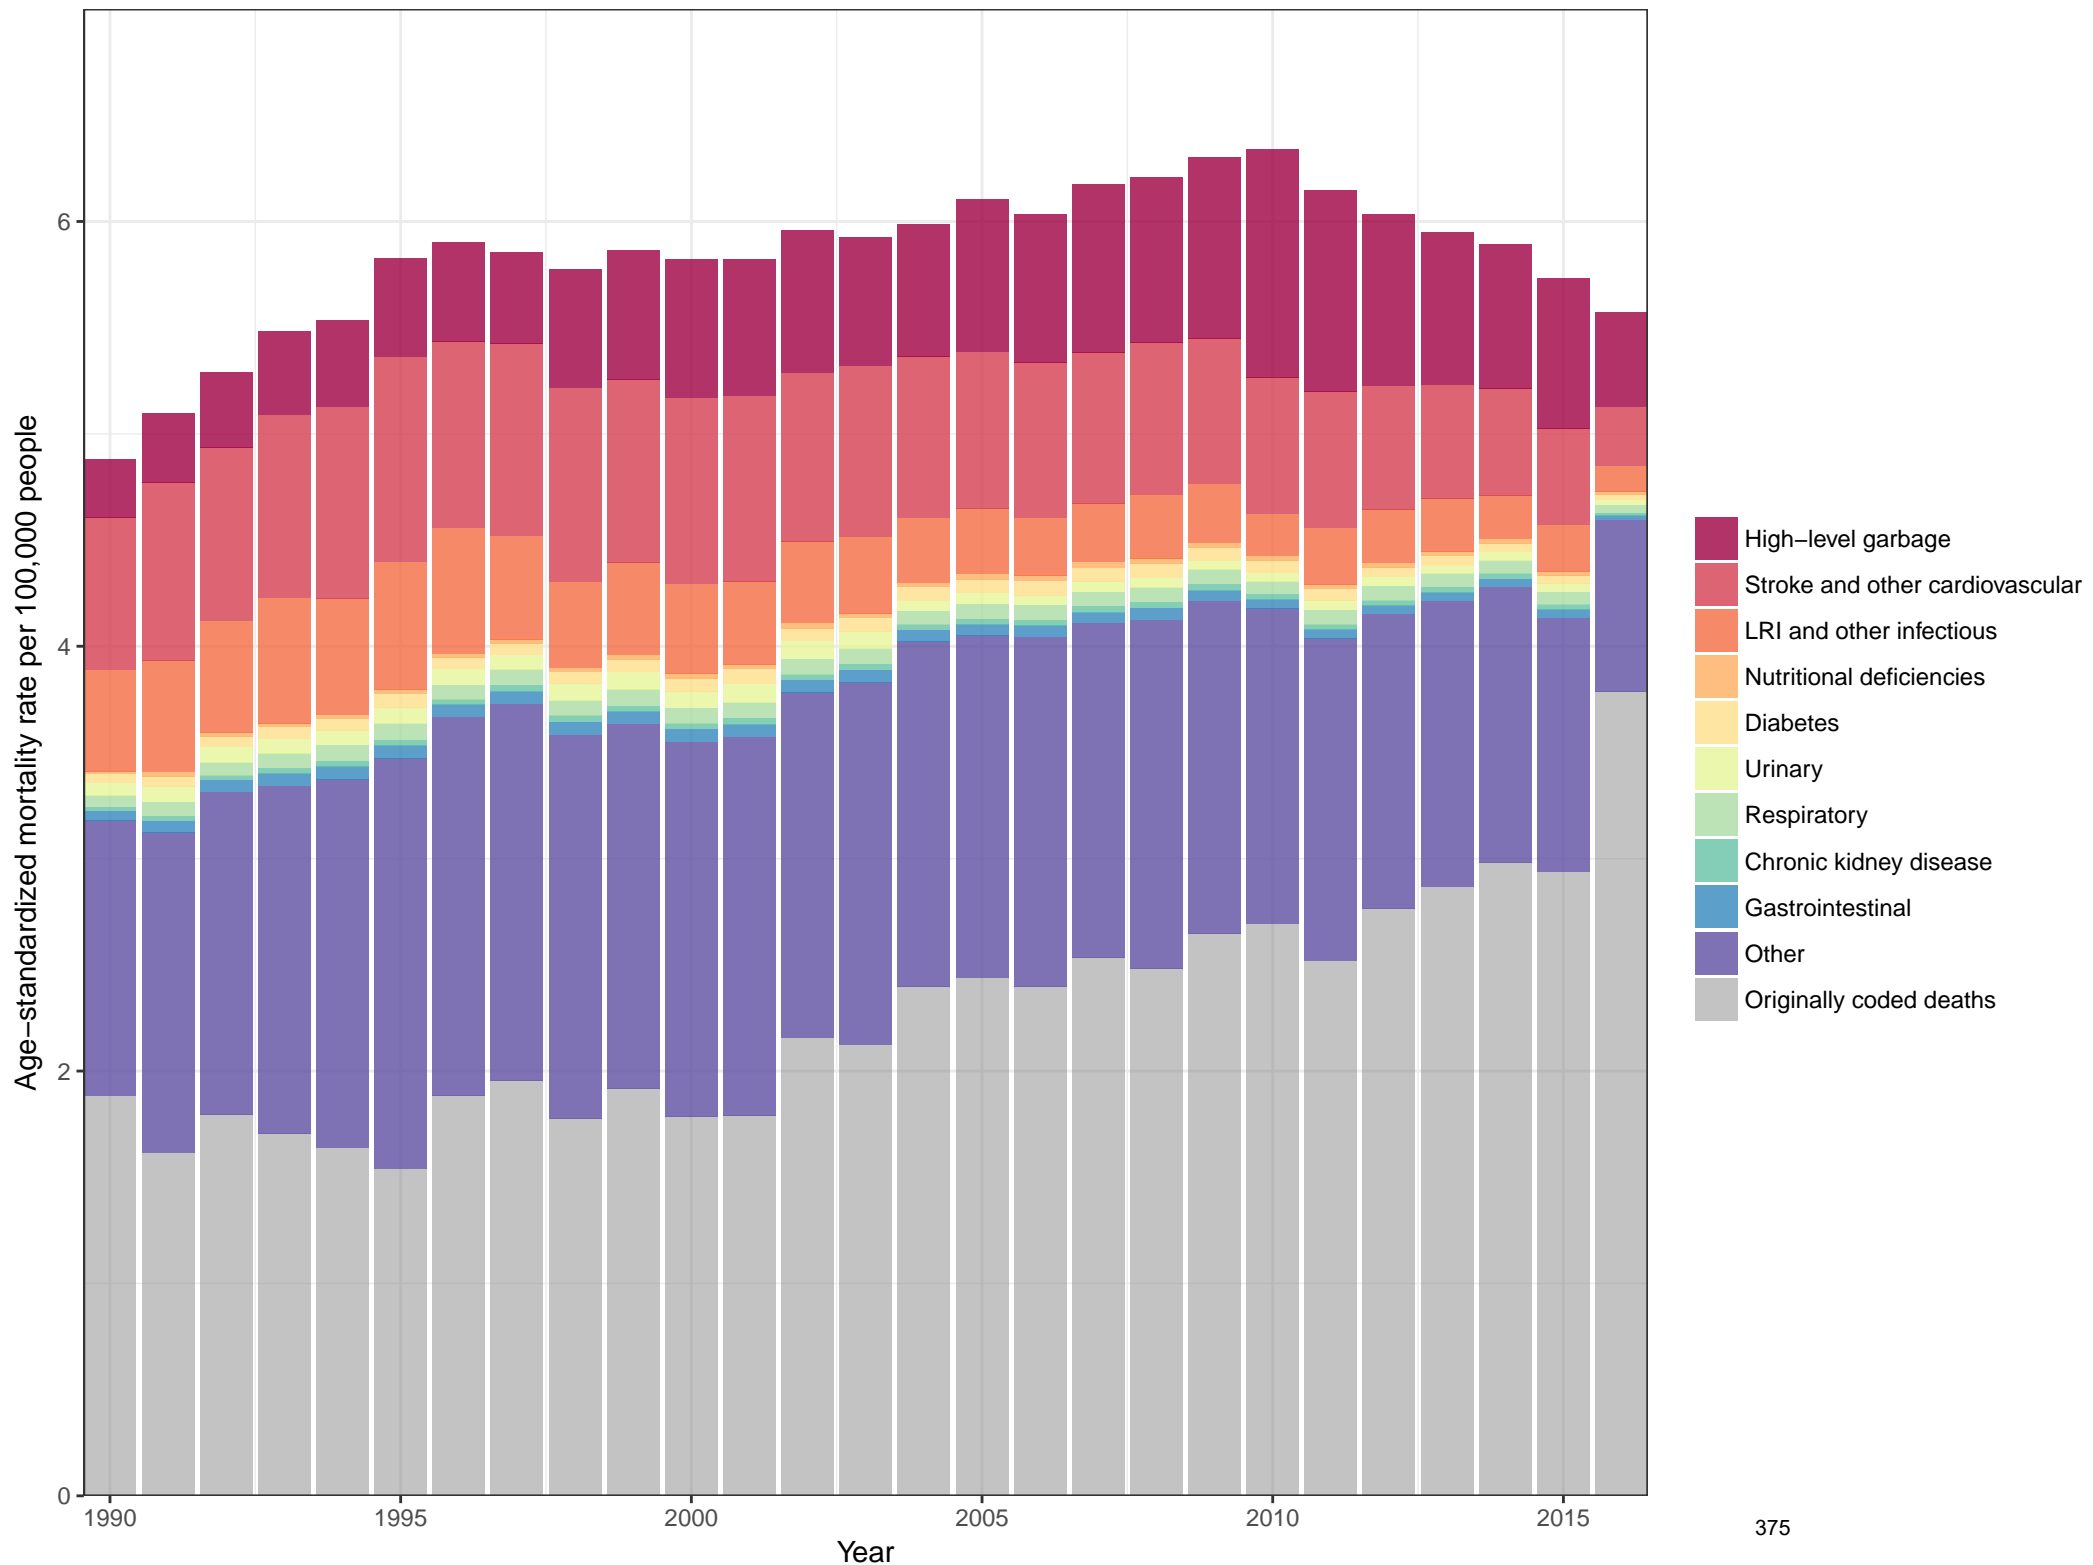

Appendix Figure 6b. Recoding of Parkinson's disease – Mexico

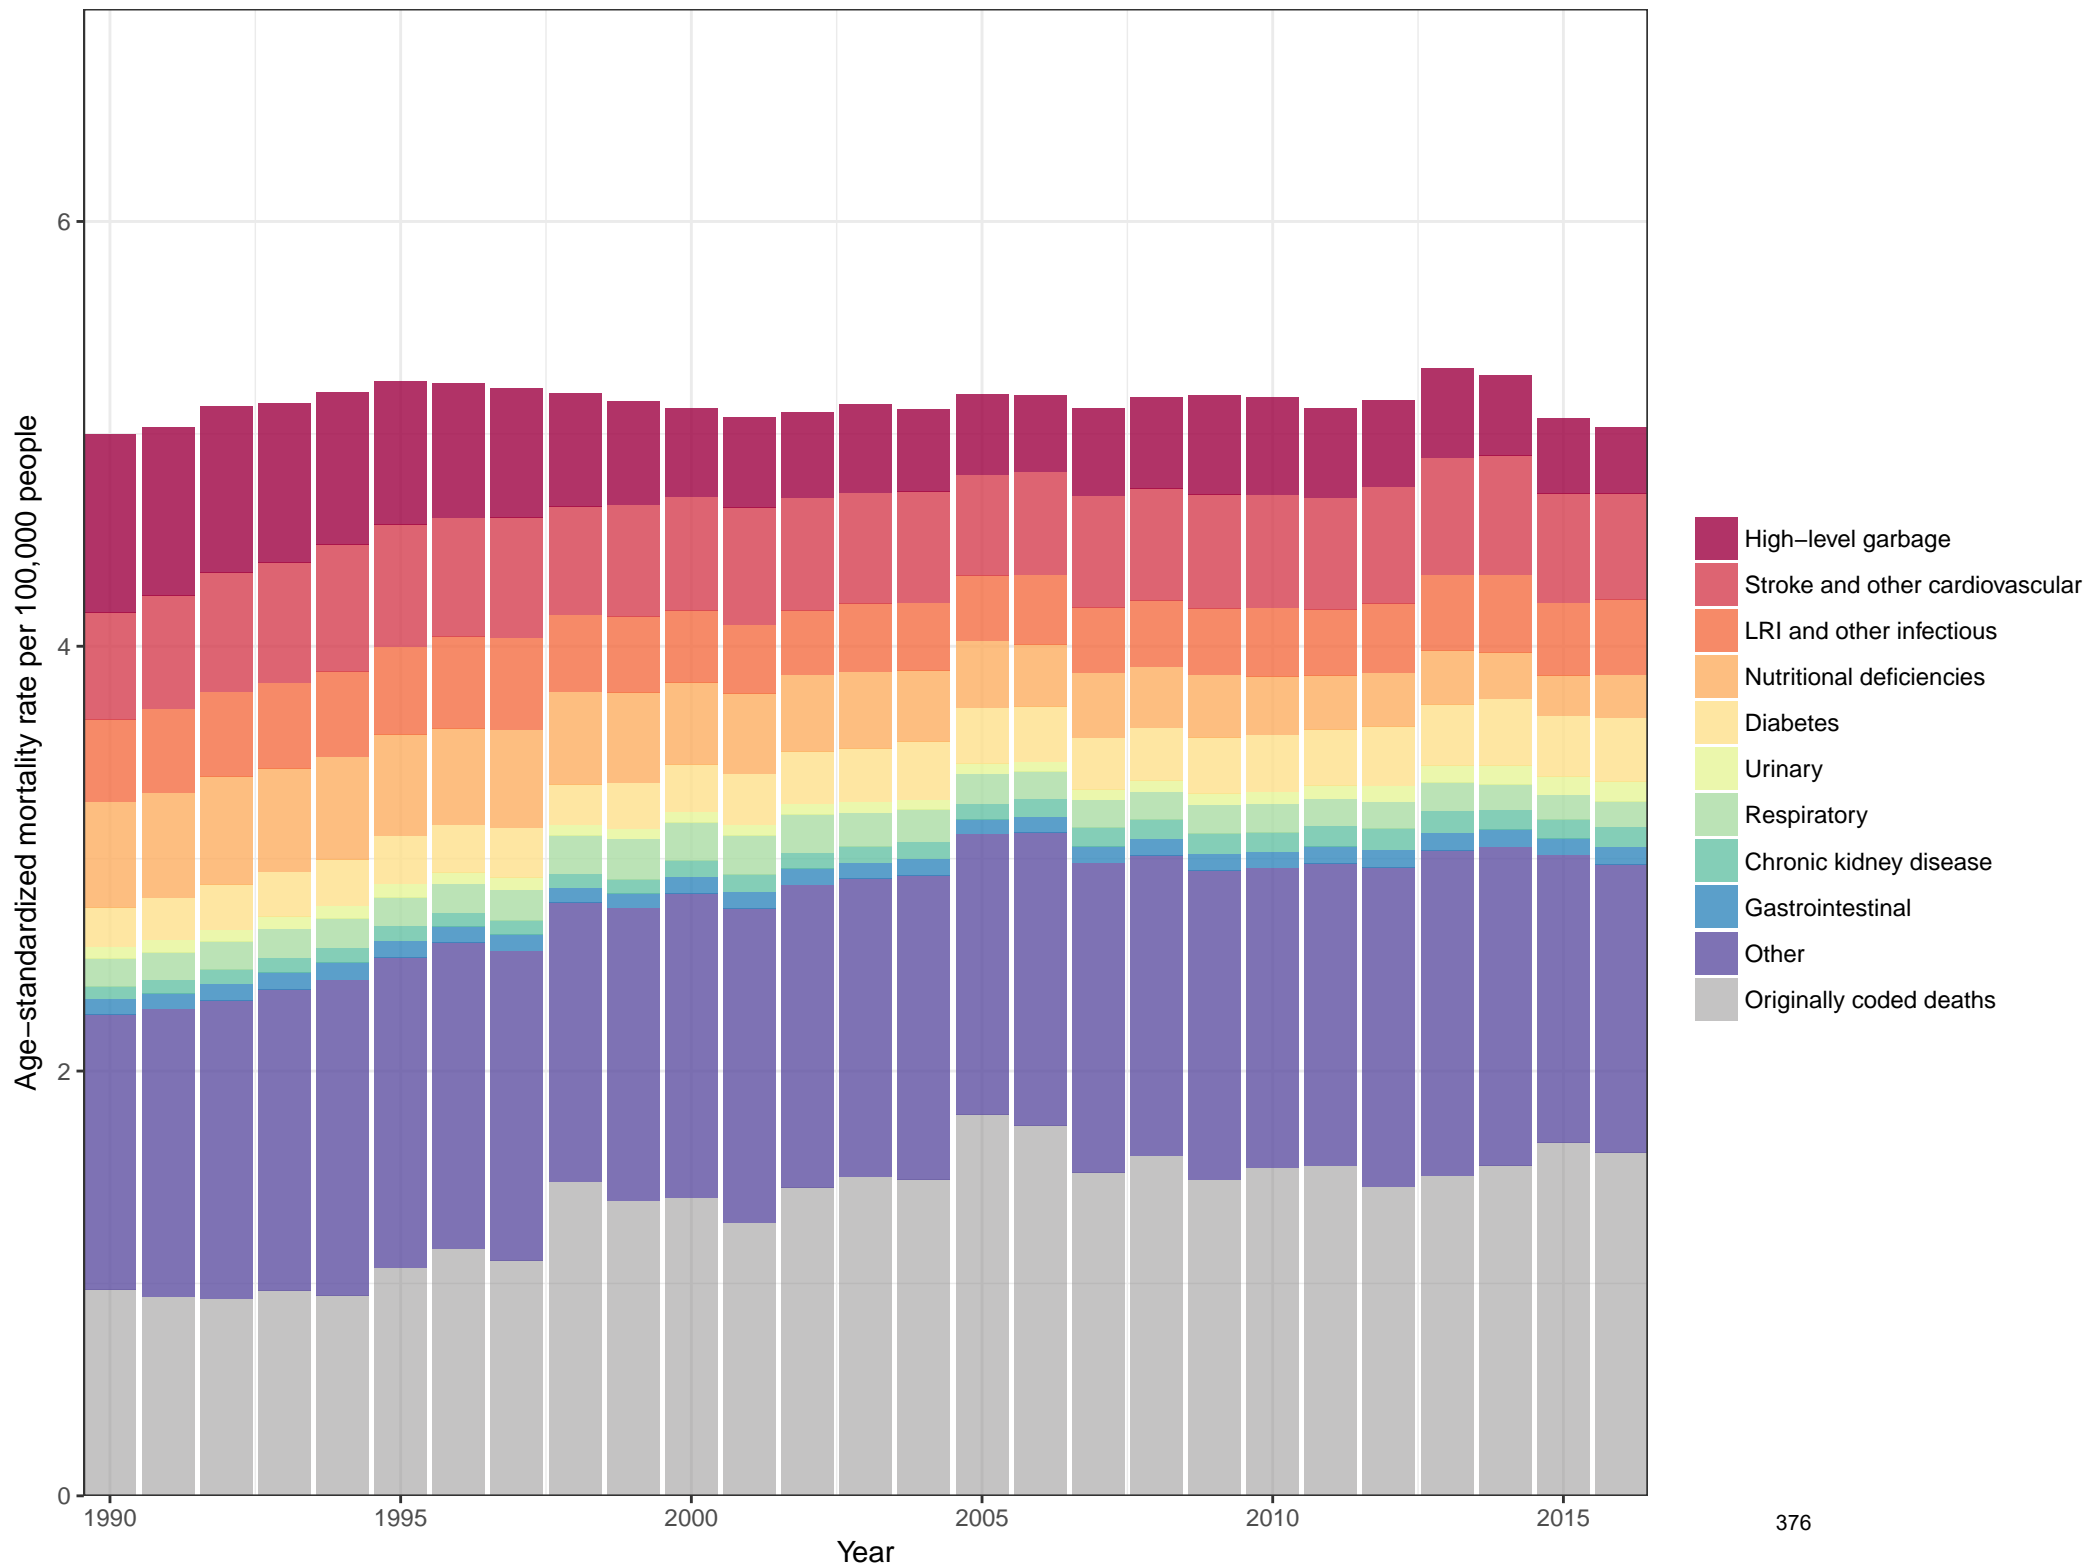

Appendix Figure 6c. Recoding of atrial fibrillation and flutter – Sweden

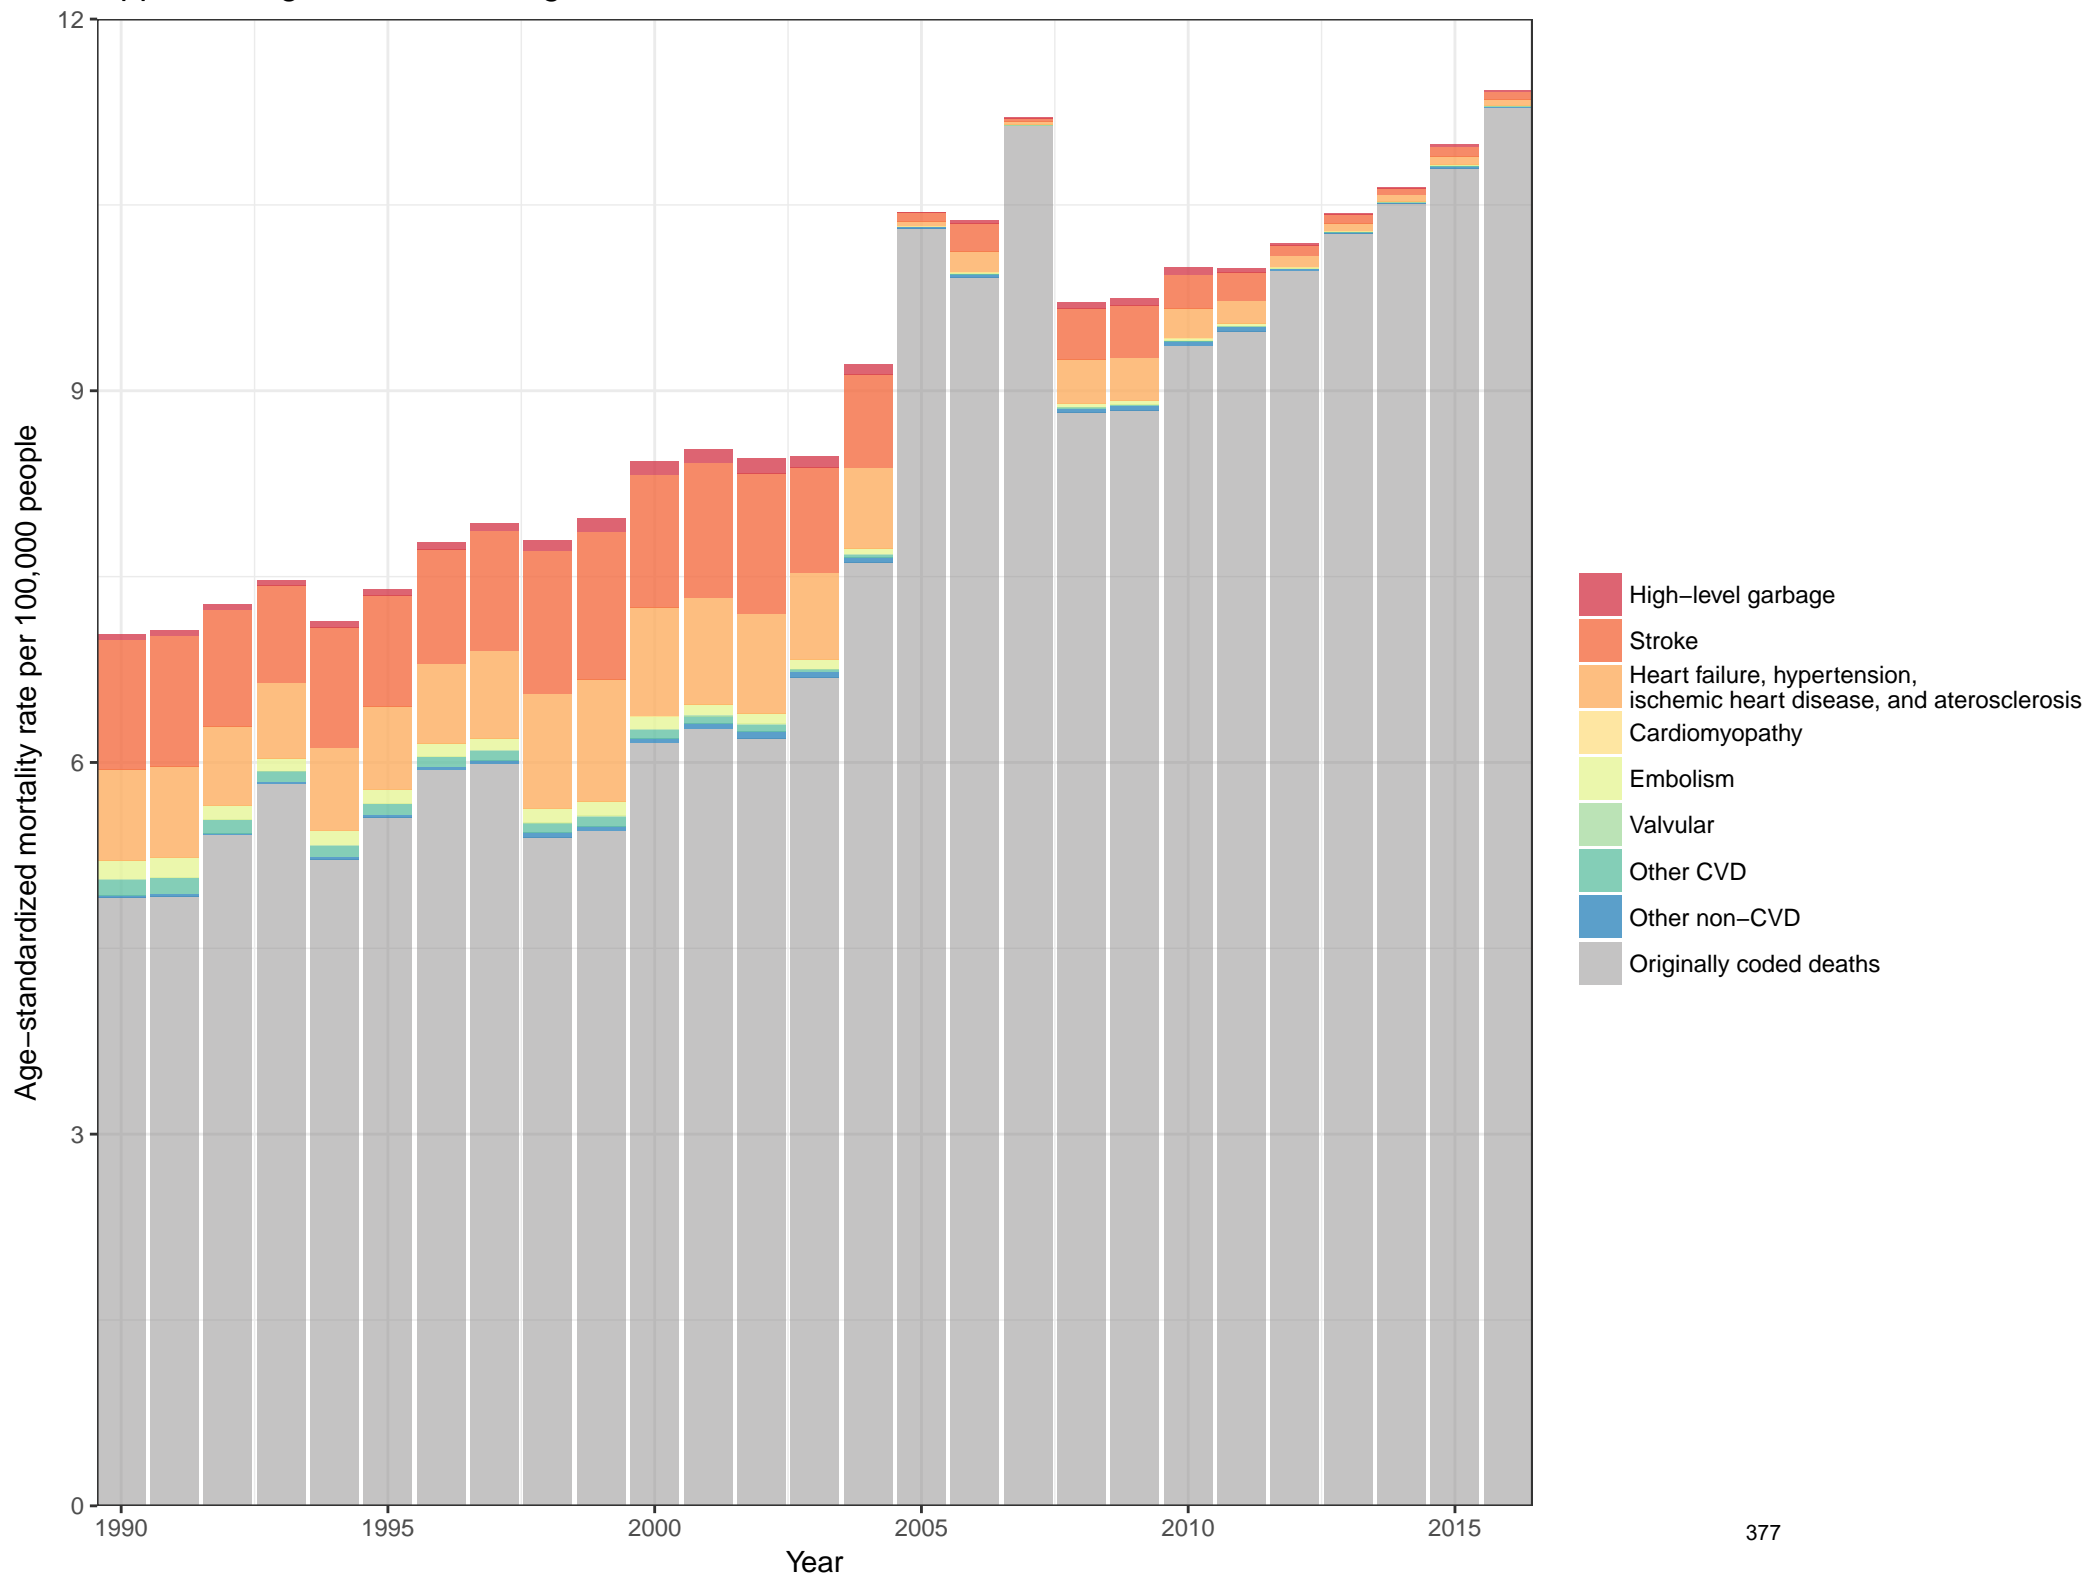

Appendix Figure 6c. Recoding of atrial fibrillation and flutter – Mexico

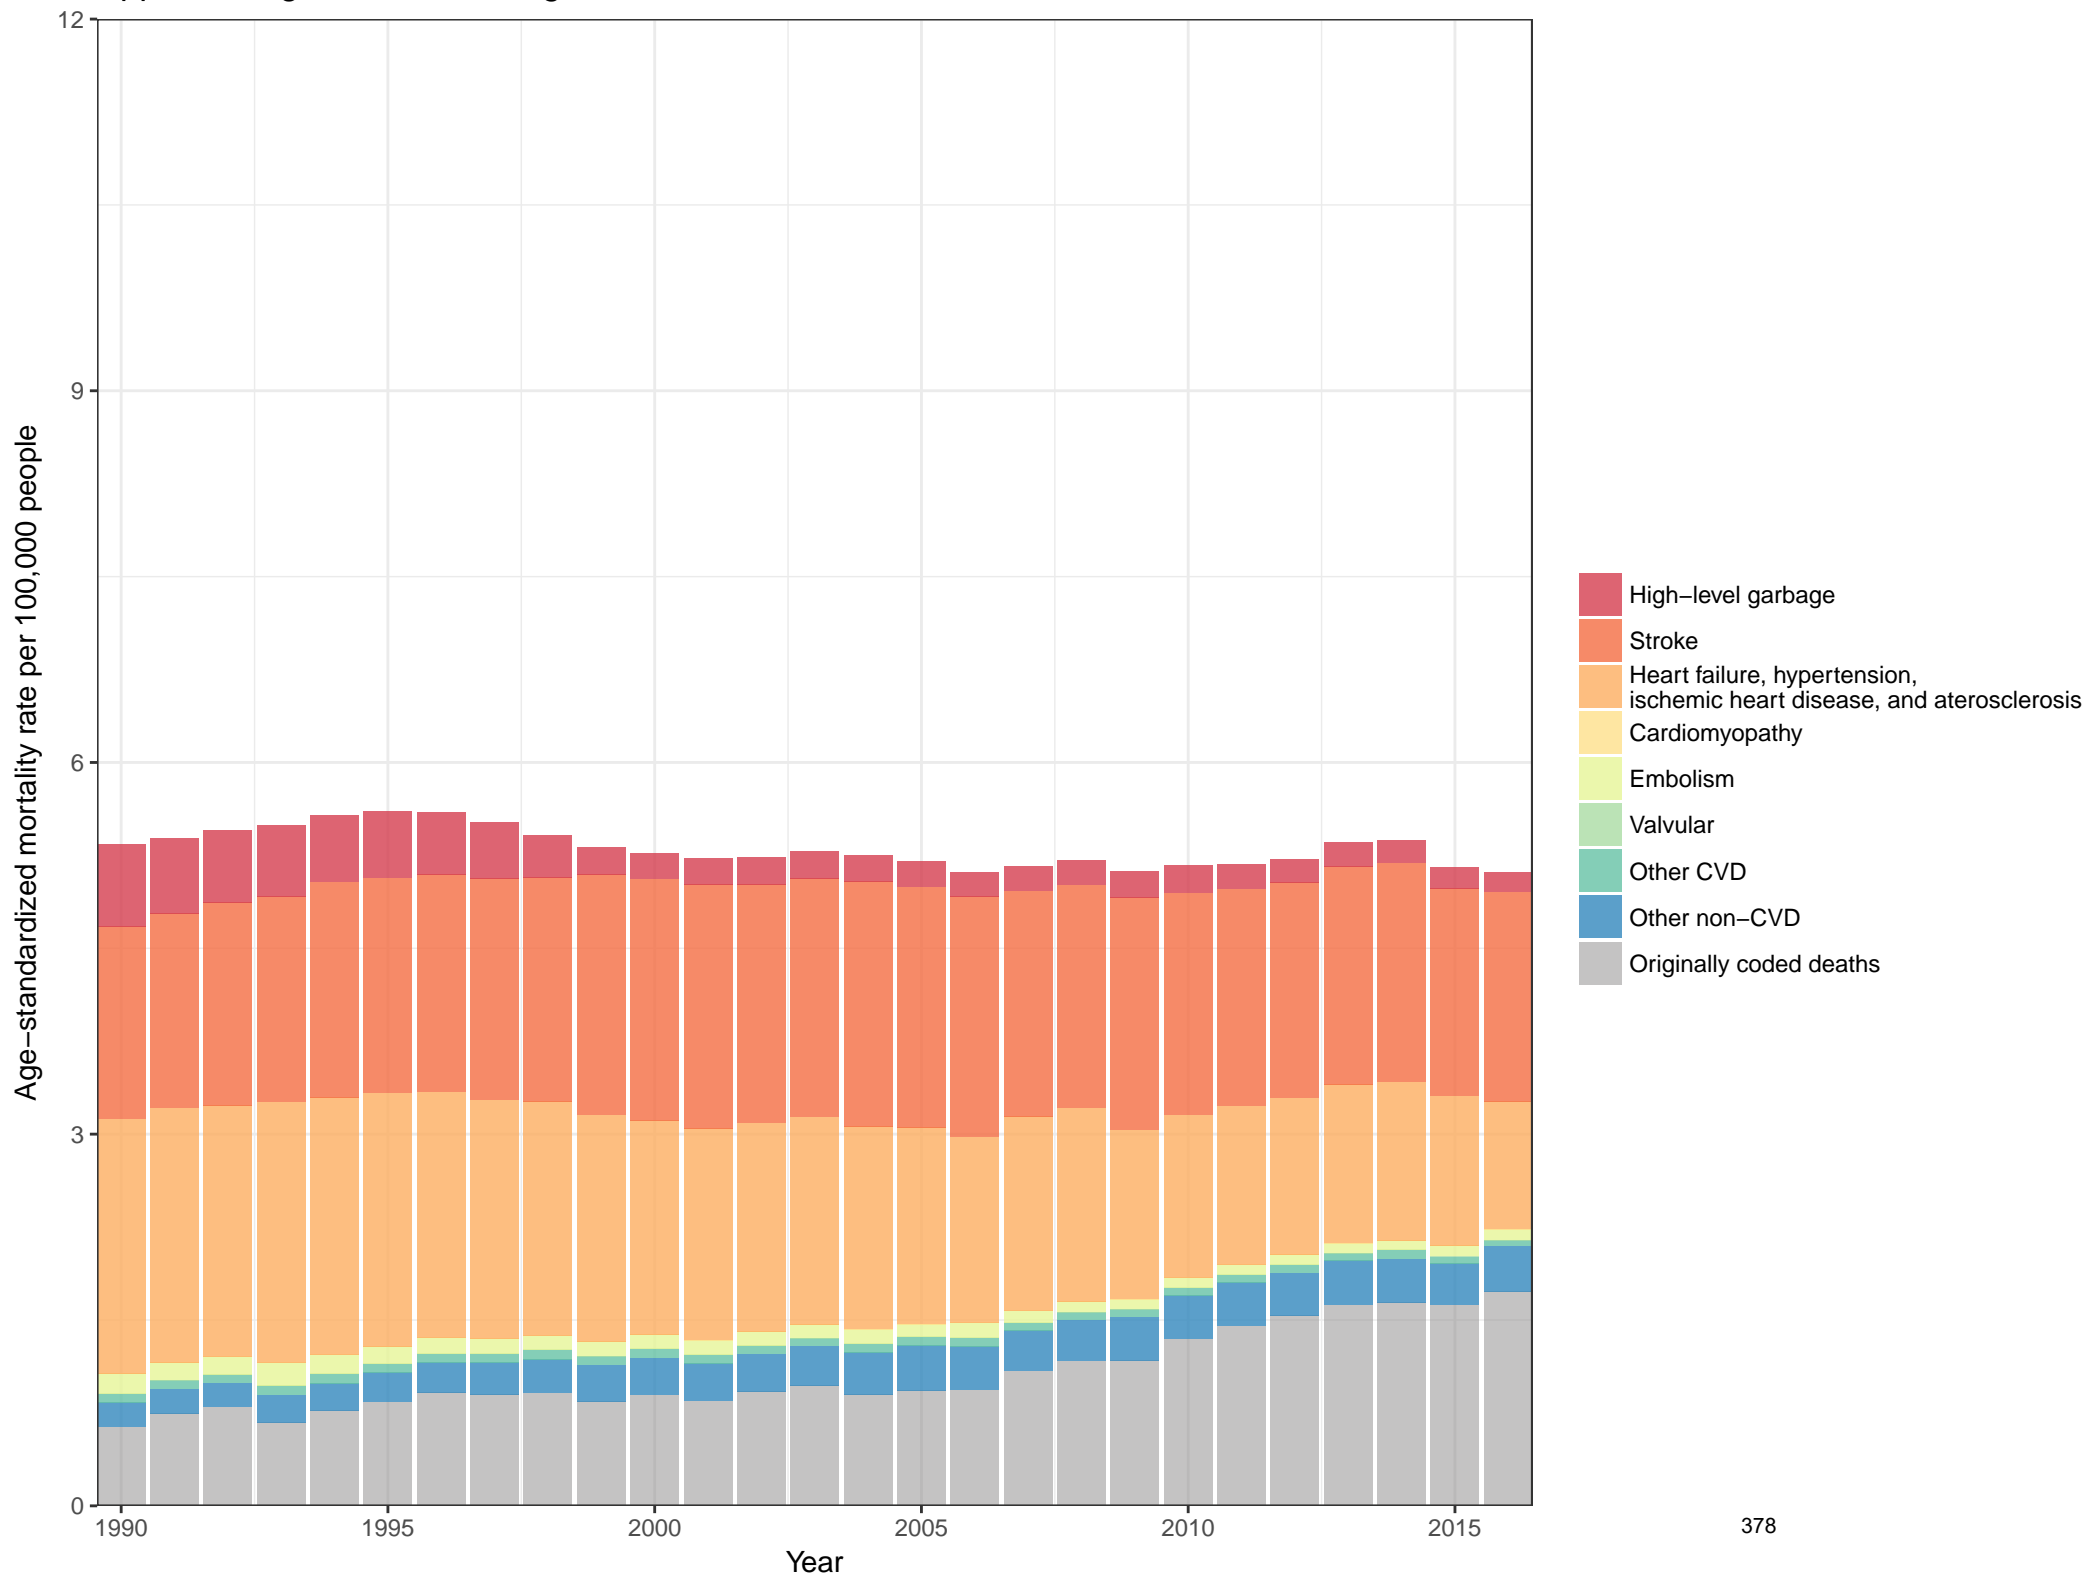



Appendix Figure 7. GBD 2017 DisMod-MR 2.1 analytical cascade

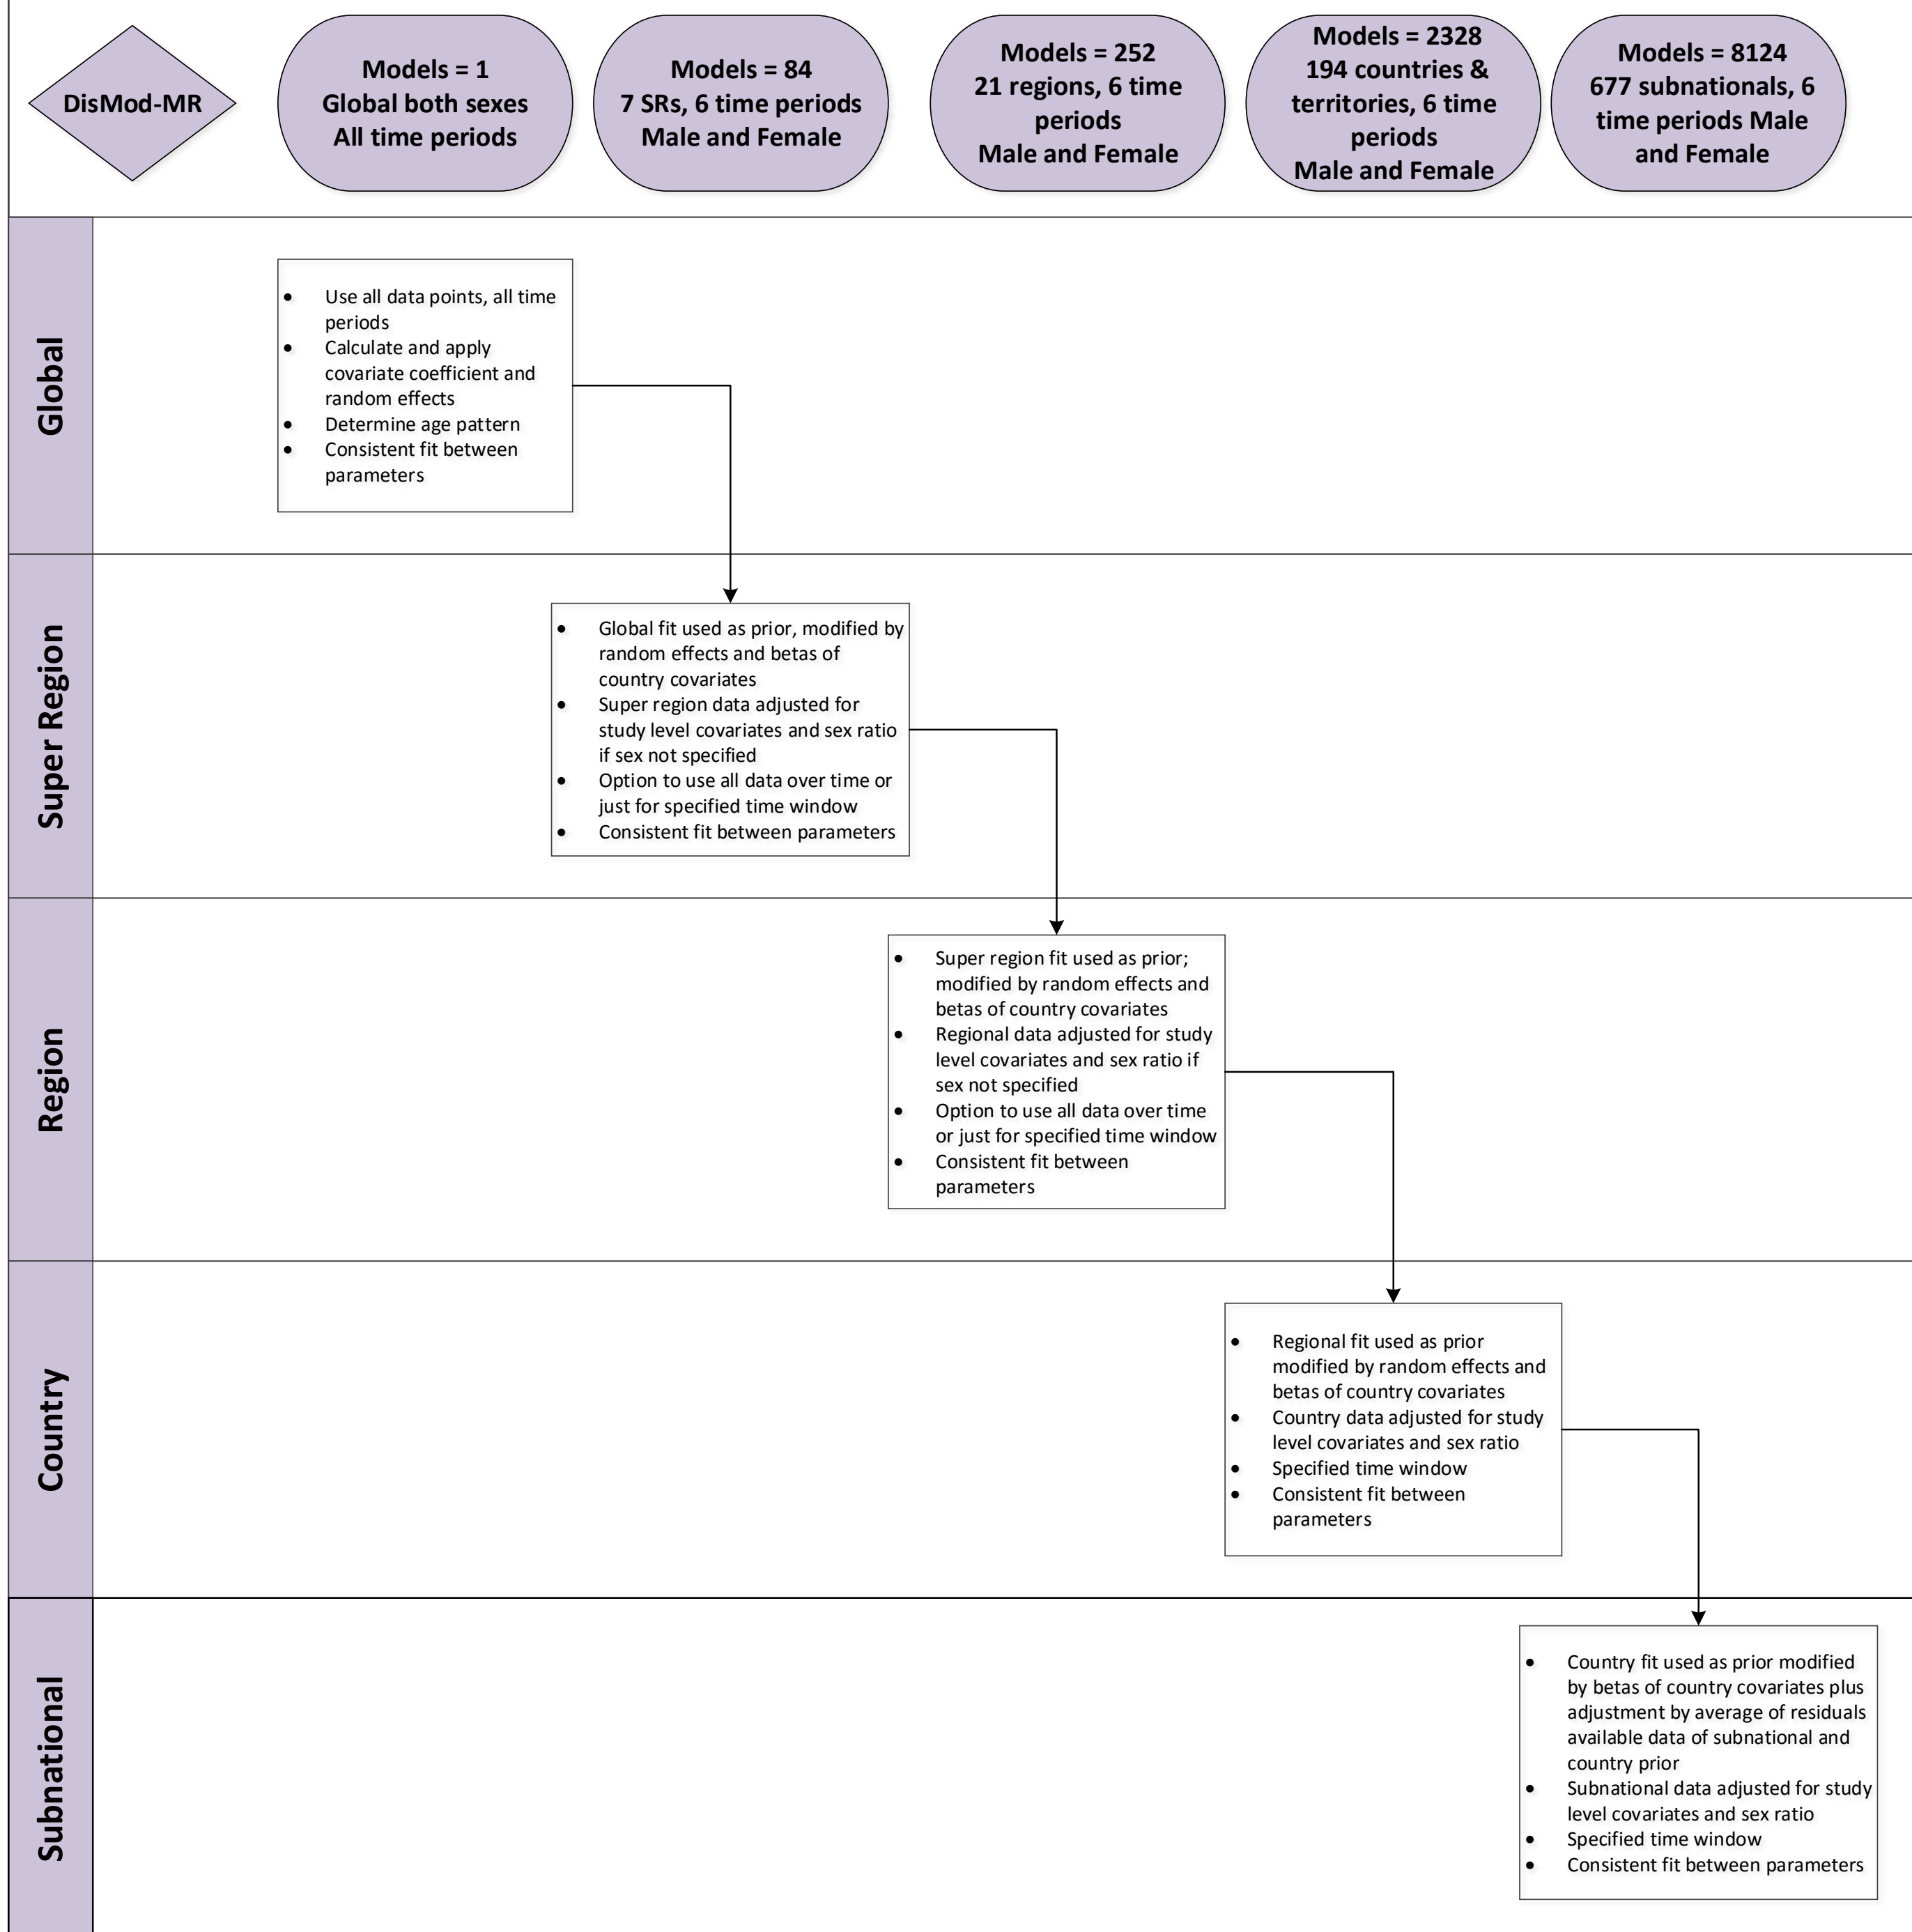

Appendix Table 1. GATHER checklist of information that should be included in reports of global health estimates, with description of compliance and location of information for GBD 2017 [Global, regional, and national age-sex specific mortality for 282 causes of death, 1980-2017: a systematic analysis for the Global Burden of Disease Study 2017]

| #                                                                                                     | GATHER checklist item                                                                                                                                                                                                                                                                                                                         | Description of compliance                                                                                                                              | Reference                                                                            |
|-------------------------------------------------------------------------------------------------------|-----------------------------------------------------------------------------------------------------------------------------------------------------------------------------------------------------------------------------------------------------------------------------------------------------------------------------------------------|--------------------------------------------------------------------------------------------------------------------------------------------------------|--------------------------------------------------------------------------------------|
| <b>Objectives and funding</b>                                                                         |                                                                                                                                                                                                                                                                                                                                               |                                                                                                                                                        |                                                                                      |
| 1                                                                                                     | Define the indicators, populations, and time periods for which estimates were made.                                                                                                                                                                                                                                                           | Narrative provided in paper and methods appendix describing indicators, definitions, and populations                                                   | Main text (Methods—Overview, Geographic units and time periods) and methods appendix |
| 2                                                                                                     | List the funding sources for the work.                                                                                                                                                                                                                                                                                                        | Funding sources listed in paper                                                                                                                        | Summary (Funding)                                                                    |
| <b>Data Inputs</b>                                                                                    |                                                                                                                                                                                                                                                                                                                                               |                                                                                                                                                        |                                                                                      |
| <i>For all data inputs from multiple sources that are synthesized as part of the study:</i>           |                                                                                                                                                                                                                                                                                                                                               |                                                                                                                                                        |                                                                                      |
| 3                                                                                                     | Describe how the data were identified and how the data were accessed.                                                                                                                                                                                                                                                                         | Narrative description of data seeking methods provided                                                                                                 | Main text (Methods) and methods appendix                                             |
| 4                                                                                                     | Specify the inclusion and exclusion criteria. Identify all ad-hoc exclusions.                                                                                                                                                                                                                                                                 | Narrative about inclusion and exclusion criteria by data type provided                                                                                 | Main text (Methods) and methods appendix                                             |
| 5                                                                                                     | Provide information on all included data sources and their main characteristics. For each data source used, report reference information or contact name/institution, population represented, data collection method, year(s) of data collection, sex and age range, diagnostic criteria or measurement method, and sample size, as relevant. | An interactive, online data source tool that provides metadata for data sources by component, geography, cause, risk, or impairment has been developed | Online data citation tools                                                           |
| 6                                                                                                     | Identify and describe any categories of input data that have potentially important biases (e.g., based on characteristics listed in item 5).                                                                                                                                                                                                  | Summary of known biases by cause included in methods appendix                                                                                          | Methods appendix                                                                     |
| <i>For data inputs that contribute to the analysis but were not synthesized as part of the study:</i> |                                                                                                                                                                                                                                                                                                                                               |                                                                                                                                                        |                                                                                      |
| 7                                                                                                     | Describe and give sources for any other data inputs.                                                                                                                                                                                                                                                                                          | Included in online data source tool, <a href="http://ghdx.healthdata.org/gbd-2017">http://ghdx.healthdata.org/gbd-2017</a>                             | Online data citation tools                                                           |
| <i>For all data inputs:</i>                                                                           |                                                                                                                                                                                                                                                                                                                                               |                                                                                                                                                        |                                                                                      |
| 8                                                                                                     | Provide all data inputs in a file format from which data can be efficiently extracted (e.g., a spreadsheet as opposed to a PDF), including all relevant meta-data listed in item 5. For any data inputs that cannot be shared due to ethical or legal                                                                                         | Downloads of input data available through online tools, including data visualization tools                                                             | Online data visualization tools, data query tools, and                               |

|                               |                                                                                                                                                                                                                                                                         |                                                                                                                                                                                                                          |                                                                                                                                                                                                                              |
|-------------------------------|-------------------------------------------------------------------------------------------------------------------------------------------------------------------------------------------------------------------------------------------------------------------------|--------------------------------------------------------------------------------------------------------------------------------------------------------------------------------------------------------------------------|------------------------------------------------------------------------------------------------------------------------------------------------------------------------------------------------------------------------------|
|                               | reasons, such as third-party ownership, provide a contact name or the name of the institution that retains the right to the data.                                                                                                                                       | and data query tools, <a href="http://ghdx.healthdata.org/gbd-2017">http://ghdx.healthdata.org/gbd-2017</a> ; input data not available in tools will be made available upon request                                      | the Global Health Data Exchange, <a href="http://ghdx.healthdata.org">http://ghdx.healthdata.org</a>                                                                                                                         |
| <b>Data analysis</b>          |                                                                                                                                                                                                                                                                         |                                                                                                                                                                                                                          |                                                                                                                                                                                                                              |
| 9                             | Provide a conceptual overview of the data analysis method. A diagram may be helpful.                                                                                                                                                                                    | Flow diagrams of the overall methodological processes, as well as cause-specific modelling processes, have been provided                                                                                                 | Main text (Methods) and methods appendix                                                                                                                                                                                     |
| 10                            | Provide a detailed description of all steps of the analysis, including mathematical formulae. This description should cover, as relevant, data cleaning, data pre-processing, data adjustments and weighting of data sources, and mathematical or statistical model(s). | Flow diagrams and corresponding methodological write-ups for each cause, as well as the demographics and causes of death databases and modelling processes, have been provided                                           | Main text (Methods) and methods appendix                                                                                                                                                                                     |
| 11                            | Describe how candidate models were evaluated and how the final model(s) were selected.                                                                                                                                                                                  | Provided in the methodological write-ups                                                                                                                                                                                 | Methods appendix                                                                                                                                                                                                             |
| 12                            | Provide the results of an evaluation of model performance, if done, as well as the results of any relevant sensitivity analysis.                                                                                                                                        | Provided in the methodological write-ups                                                                                                                                                                                 | Methods appendix                                                                                                                                                                                                             |
| 13                            | Describe methods for calculating uncertainty of the estimates. State which sources of uncertainty were, and were not, accounted for in the uncertainty analysis.                                                                                                        | Provided in the methodological write-ups                                                                                                                                                                                 | Methods appendix                                                                                                                                                                                                             |
| 14                            | State how analytic or statistical source code used to generate estimates can be accessed.                                                                                                                                                                               | Access statement provided                                                                                                                                                                                                | Code is provided in an online repository                                                                                                                                                                                     |
| <b>Results and Discussion</b> |                                                                                                                                                                                                                                                                         |                                                                                                                                                                                                                          |                                                                                                                                                                                                                              |
| 15                            | Provide published estimates in a file format from which data can be efficiently extracted.                                                                                                                                                                              | Results are available through online data visualization tools, the Global Health Data Exchange, and the online data query tool ( <a href="http://ghdx.healthdata.org/gbd-2017">http://ghdx.healthdata.org/gbd-2017</a> ) | Main text, methods appendix, and online data tools (data visualization tools, data query tools, and the Global Health Data Exchange, <a href="http://ghdx.healthdata.org/gbd-2017">http://ghdx.healthdata.org/gbd-2017</a> ) |
| 16                            | Report a quantitative measure of the uncertainty of the estimates (e.g. uncertainty intervals).                                                                                                                                                                         | Uncertainty intervals are provided with all results                                                                                                                                                                      | Main text, methods appendix, and online data tools (data                                                                                                                                                                     |

|    |                                                                                                                                                          |                                                                                                                                           |                                                                                                                                                                     |
|----|----------------------------------------------------------------------------------------------------------------------------------------------------------|-------------------------------------------------------------------------------------------------------------------------------------------|---------------------------------------------------------------------------------------------------------------------------------------------------------------------|
|    |                                                                                                                                                          |                                                                                                                                           | visualization tools, data query tools, and the Global Health Data Exchange, <a href="http://ghdx.healthdata.org/gbd-2017">http://ghdx.healthdata.org/gbd-2017</a> ) |
| 17 | Interpret results in light of existing evidence. If updating a previous set of estimates, describe the reasons for changes in estimates.                 | Discussion of methodological changes between GBD rounds provided in the narrative of the Article and methods appendix                     | Main text (Methods and Discussion) and methods appendix                                                                                                             |
| 18 | Discuss limitations of the estimates. Include a discussion of any modelling assumptions or data limitations that affect interpretation of the estimates. | Discussion of limitations provided in the narrative of the main paper, as well as in the methodological write-ups in the methods appendix | Main text (Limitations) and methods appendix                                                                                                                        |

**Appendix Table 2. GBD 2017 location hierarchy with levels**

| Geography                                        | Level |
|--------------------------------------------------|-------|
| Global                                           | 0     |
| Low SDI                                          | 1     |
| Low-middle SDI                                   | 1     |
| Middle SDI                                       | 1     |
| High-middle SDI                                  | 1     |
| High SDI                                         | 1     |
| Central Europe, Eastern Europe, and Central Asia | 1     |
| Central Asia                                     | 2     |
| Armenia                                          | 3     |
| Azerbaijan                                       | 3     |
| Georgia                                          | 3     |
| Kazakhstan                                       | 3     |
| Kyrgyzstan                                       | 3     |
| Mongolia                                         | 3     |
| Tajikistan                                       | 3     |
| Turkmenistan                                     | 3     |
| Uzbekistan                                       | 3     |
| Central Europe                                   | 2     |
| Albania                                          | 3     |
| Bosnia and Herzegovina                           | 3     |
| Bulgaria                                         | 3     |
| Croatia                                          | 3     |
| Czech Republic                                   | 3     |
| Hungary                                          | 3     |
| Macedonia                                        | 3     |
| Montenegro                                       | 3     |
| Poland                                           | 3     |
| Romania                                          | 3     |
| Serbia                                           | 3     |
| Slovakia                                         | 3     |
| Slovenia                                         | 3     |
| Eastern Europe                                   | 2     |
| Belarus                                          | 3     |
| Estonia                                          | 3     |
| Latvia                                           | 3     |
| Lithuania                                        | 3     |
| Moldova                                          | 3     |
| Russian Federation                               | 3     |
| Ukraine                                          | 3     |
| High-income                                      | 1     |
| Australasia                                      | 2     |
| Australia                                        | 3     |
| New Zealand                                      | 3     |
| High-income Asia Pacific                         | 2     |

**Appendix Table 2. GBD 2017 location hierarchy with levels**

| Geography | Level |
|-----------|-------|
| Brunei    | 3     |
| Japan     | 3     |
| Aichi     | 4     |
| Akita     | 4     |
| Aomori    | 4     |
| Chiba     | 4     |
| Ehime     | 4     |
| Fukui     | 4     |
| Fukuoka   | 4     |
| Fukushima | 4     |
| Gifu      | 4     |
| Gunma     | 4     |
| Hiroshima | 4     |
| Hokkaidō  | 4     |
| Hyōgo     | 4     |
| Ibaraki   | 4     |
| Ishikawa  | 4     |
| Iwate     | 4     |
| Kagawa    | 4     |
| Kagoshima | 4     |
| Kanagawa  | 4     |
| Kōchi     | 4     |
| Kumamoto  | 4     |
| Kyōto     | 4     |
| Mie       | 4     |
| Miyagi    | 4     |
| Miyazaki  | 4     |
| Nagano    | 4     |
| Nagasaki  | 4     |
| Nara      | 4     |
| Niigata   | 4     |
| Ōita      | 4     |
| Okayama   | 4     |
| Okinawa   | 4     |
| Ōsaka     | 4     |
| Saga      | 4     |
| Saitama   | 4     |
| Shiga     | 4     |
| Shimane   | 4     |
| Shizuoka  | 4     |
| Tochigi   | 4     |
| Tokushima | 4     |
| Tōkyō     | 4     |
| Tottori   | 4     |
| Toyama    | 4     |

**Appendix Table 2. GBD 2017 location hierarchy with levels**

| <b>Geography</b>          | <b>Level</b> |
|---------------------------|--------------|
| Wakayama                  | 4            |
| Yamagata                  | 4            |
| Yamaguchi                 | 4            |
| Yamanashi                 | 4            |
| South Korea               | 3            |
| Singapore                 | 3            |
| High-income North America | 2            |
| Canada                    | 3            |
| Greenland                 | 3            |
| United States             | 3            |
| Alabama                   | 4            |
| Alaska                    | 4            |
| Arizona                   | 4            |
| Arkansas                  | 4            |
| California                | 4            |
| Colorado                  | 4            |
| Connecticut               | 4            |
| Delaware                  | 4            |
| District of Columbia      | 4            |
| Florida                   | 4            |
| Georgia                   | 4            |
| Hawaii                    | 4            |
| Idaho                     | 4            |
| Illinois                  | 4            |
| Indiana                   | 4            |
| Iowa                      | 4            |
| Kansas                    | 4            |
| Kentucky                  | 4            |
| Louisiana                 | 4            |
| Maine                     | 4            |
| Maryland                  | 4            |
| Massachusetts             | 4            |
| Michigan                  | 4            |
| Minnesota                 | 4            |
| Mississippi               | 4            |
| Missouri                  | 4            |
| Montana                   | 4            |
| Nebraska                  | 4            |
| Nevada                    | 4            |
| New Hampshire             | 4            |
| New Jersey                | 4            |
| New Mexico                | 4            |
| New York                  | 4            |
| North Carolina            | 4            |
| North Dakota              | 4            |

**Appendix Table 2. GBD 2017 location hierarchy with levels**

| Geography               | Level |
|-------------------------|-------|
| Ohio                    | 4     |
| Oklahoma                | 4     |
| Oregon                  | 4     |
| Pennsylvania            | 4     |
| Rhode Island            | 4     |
| South Carolina          | 4     |
| South Dakota            | 4     |
| Tennessee               | 4     |
| Texas                   | 4     |
| Utah                    | 4     |
| Vermont                 | 4     |
| Virginia                | 4     |
| Washington              | 4     |
| West Virginia           | 4     |
| Wisconsin               | 4     |
| Wyoming                 | 4     |
| Southern Latin America  | 2     |
| Argentina               | 3     |
| Chile                   | 3     |
| Uruguay                 | 3     |
| Western Europe          | 2     |
| Andorra                 | 3     |
| Austria                 | 3     |
| Belgium                 | 3     |
| Cyprus                  | 3     |
| Denmark                 | 3     |
| Finland                 | 3     |
| France                  | 3     |
| Germany                 | 3     |
| Greece                  | 3     |
| Iceland                 | 3     |
| Ireland                 | 3     |
| Israel                  | 3     |
| Italy                   | 3     |
| Luxembourg              | 3     |
| Malta                   | 3     |
| Netherlands             | 3     |
| Norway                  | 3     |
| Portugal                | 3     |
| Spain                   | 3     |
| Sweden                  | 3     |
| Stockholm               | 4     |
| Sweden except Stockholm | 4     |
| Switzerland             | 3     |
| United Kingdom          | 3     |



**Appendix Table 2. GBD 2017 location hierarchy with levels**

| <b>Geography</b>       | <b>Level</b> |
|------------------------|--------------|
| England                | 4            |
| East Midlands          | 5            |
| Derby                  | 6            |
| Derbyshire             | 6            |
| Leicester              | 6            |
| Leicestershire         | 6            |
| Lincolnshire           | 6            |
| Northamptonshire       | 6            |
| Nottingham             | 6            |
| Nottinghamshire        | 6            |
| Rutland                | 6            |
| East of England        | 5            |
| Bedford                | 6            |
| Cambridgeshire         | 6            |
| Central Bedfordshire   | 6            |
| Essex                  | 6            |
| Hertfordshire          | 6            |
| Luton                  | 6            |
| Norfolk                | 6            |
| Peterborough           | 6            |
| Southend-on-Sea        | 6            |
| Suffolk                | 6            |
| Thurrock               | 6            |
| Greater London         | 5            |
| Barking and Dagenham   | 6            |
| Barnet                 | 6            |
| Bexley                 | 6            |
| Brent                  | 6            |
| Bromley                | 6            |
| Camden                 | 6            |
| Croydon                | 6            |
| Ealing                 | 6            |
| Enfield                | 6            |
| Greenwich              | 6            |
| Hackney                | 6            |
| Hammersmith and Fulham | 6            |
| Haringey               | 6            |
| Harrow                 | 6            |
| Havering               | 6            |
| Hillingdon             | 6            |
| Hounslow               | 6            |
| Islington              | 6            |
| Kensington and Chelsea | 6            |
| Kingston upon Thames   | 6            |
| Lambeth                | 6            |

**Appendix Table 2. GBD 2017 location hierarchy with levels**

| Geography                 | Level |
|---------------------------|-------|
| Lewisham                  | 6     |
| Merton                    | 6     |
| Newham                    | 6     |
| Redbridge                 | 6     |
| Richmond upon Thames      | 6     |
| Southwark                 | 6     |
| Sutton                    | 6     |
| Tower Hamlets             | 6     |
| Waltham Forest            | 6     |
| Wandsworth                | 6     |
| Westminster               | 6     |
| North East England        | 5     |
| County Durham             | 6     |
| Darlington                | 6     |
| Gateshead                 | 6     |
| Hartlepool                | 6     |
| Middlesbrough             | 6     |
| Newcastle upon Tyne       | 6     |
| North Tyneside            | 6     |
| Northumberland            | 6     |
| Redcar and Cleveland      | 6     |
| South Tyneside            | 6     |
| Stockton-on-Tees          | 6     |
| Sunderland                | 6     |
| North West England        | 5     |
| Blackburn with Darwen     | 6     |
| Blackpool                 | 6     |
| Bolton                    | 6     |
| Bury                      | 6     |
| Cheshire East             | 6     |
| Cheshire West and Chester | 6     |
| Cumbria                   | 6     |
| Halton                    | 6     |
| Knowsley                  | 6     |
| Lancashire                | 6     |
| Liverpool                 | 6     |
| Manchester                | 6     |
| Oldham                    | 6     |
| Rochdale                  | 6     |
| Salford                   | 6     |
| Sefton                    | 6     |
| St Helens                 | 6     |
| Stockport                 | 6     |
| Tameside                  | 6     |
| Trafford                  | 6     |

**Appendix Table 2. GBD 2017 location hierarchy with levels**

| Geography                    | Level |
|------------------------------|-------|
| Warrington                   | 6     |
| Wigan                        | 6     |
| Wirral                       | 6     |
| South East England           | 5     |
| Bracknell Forest             | 6     |
| Brighton and Hove            | 6     |
| Buckinghamshire              | 6     |
| East Sussex                  | 6     |
| Hampshire                    | 6     |
| Isle of Wight                | 6     |
| Kent                         | 6     |
| Medway                       | 6     |
| Milton Keynes                | 6     |
| Oxfordshire                  | 6     |
| Portsmouth                   | 6     |
| Reading                      | 6     |
| Slough                       | 6     |
| Southampton                  | 6     |
| Surrey                       | 6     |
| West Berkshire               | 6     |
| West Sussex                  | 6     |
| Windsor and Maidenhead       | 6     |
| Wokingham                    | 6     |
| South West England           | 5     |
| Bath and North East Somerset | 6     |
| Bournemouth                  | 6     |
| Bristol, City of             | 6     |
| Cornwall                     | 6     |
| Devon                        | 6     |
| Dorset                       | 6     |
| Gloucestershire              | 6     |
| North Somerset               | 6     |
| Plymouth                     | 6     |
| Poole                        | 6     |
| Somerset                     | 6     |
| South Gloucestershire        | 6     |
| Swindon                      | 6     |
| Torbay                       | 6     |
| Wiltshire                    | 6     |
| West Midlands                | 5     |
| Birmingham                   | 6     |
| Coventry                     | 6     |
| Dudley                       | 6     |
| Herefordshire, County of     | 6     |
| Sandwell                     | 6     |

**Appendix Table 2. GBD 2017 location hierarchy with levels**

| <b>Geography</b>            | <b>Level</b> |
|-----------------------------|--------------|
| Shropshire                  | 6            |
| Solihull                    | 6            |
| Staffordshire               | 6            |
| Stoke-on-Trent              | 6            |
| Telford and Wrekin          | 6            |
| Walsall                     | 6            |
| Warwickshire                | 6            |
| Wolverhampton               | 6            |
| Worcestershire              | 6            |
| Yorkshire and the Humber    | 5            |
| Barnsley                    | 6            |
| Bradford                    | 6            |
| Calderdale                  | 6            |
| Doncaster                   | 6            |
| East Riding of Yorkshire    | 6            |
| Kingston upon Hull, City of | 6            |
| Kirklees                    | 6            |
| Leeds                       | 6            |
| North East Lincolnshire     | 6            |
| North Lincolnshire          | 6            |
| North Yorkshire             | 6            |
| Rotherham                   | 6            |
| Sheffield                   | 6            |
| Wakefield                   | 6            |
| York                        | 6            |
| Northern Ireland            | 4            |
| Scotland                    | 4            |
| Wales                       | 4            |
| Latin America and Caribbean | 1            |
| Andean Latin America        | 2            |
| Bolivia                     | 3            |
| Ecuador                     | 3            |
| Peru                        | 3            |
| Caribbean                   | 2            |
| Antigua and Barbuda         | 3            |
| The Bahamas                 | 3            |
| Barbados                    | 3            |
| Belize                      | 3            |
| Bermuda                     | 3            |
| Cuba                        | 3            |
| Dominica                    | 3            |
| Dominican Republic          | 3            |
| Grenada                     | 3            |
| Guyana                      | 3            |
| Haiti                       | 3            |

**Appendix Table 2. GBD 2017 location hierarchy with levels**

| <b>Geography</b>                 | <b>Level</b> |
|----------------------------------|--------------|
| Jamaica                          | 3            |
| Puerto Rico                      | 3            |
| Saint Lucia                      | 3            |
| Saint Vincent and the Grenadines | 3            |
| Suriname                         | 3            |
| Trinidad and Tobago              | 3            |
| Virgin Islands, U.S.             | 3            |
| Central Latin America            | 2            |
| Colombia                         | 3            |
| Costa Rica                       | 3            |
| El Salvador                      | 3            |
| Guatemala                        | 3            |
| Honduras                         | 3            |
| Mexico                           | 3            |
| Aguascalientes                   | 4            |
| Baja California                  | 4            |
| Baja California Sur              | 4            |
| Campeche                         | 4            |
| Chiapas                          | 4            |
| Chihuahua                        | 4            |
| Coahuila                         | 4            |
| Colima                           | 4            |
| Mexico City                      | 4            |
| Durango                          | 4            |
| Guanajuato                       | 4            |
| Guerrero                         | 4            |
| Hidalgo                          | 4            |
| Jalisco                          | 4            |
| México                           | 4            |
| Michoacán de Ocampo              | 4            |
| Morelos                          | 4            |
| Nayarit                          | 4            |
| Nuevo León                       | 4            |
| Oaxaca                           | 4            |
| Puebla                           | 4            |
| Querétaro                        | 4            |
| Quintana Roo                     | 4            |
| San Luis Potosí                  | 4            |
| Sinaloa                          | 4            |
| Sonora                           | 4            |
| Tabasco                          | 4            |
| Tamaulipas                       | 4            |
| Tlaxcala                         | 4            |
| Veracruz de Ignacio de la Llave  | 4            |
| Yucatán                          | 4            |

**Appendix Table 2. GBD 2017 location hierarchy with levels**

| Geography                    | Level |
|------------------------------|-------|
| Zacatecas                    | 4     |
| Nicaragua                    | 3     |
| Panama                       | 3     |
| Venezuela                    | 3     |
| Tropical Latin America       | 2     |
| Brazil                       | 3     |
| Acre                         | 4     |
| Alagoas                      | 4     |
| Amapá                        | 4     |
| Amazonas                     | 4     |
| Bahia                        | 4     |
| Ceará                        | 4     |
| Distrito Federal             | 4     |
| Espírito Santo               | 4     |
| Goiás                        | 4     |
| Maranhão                     | 4     |
| Mato Grosso                  | 4     |
| Mato Grosso do Sul           | 4     |
| Minas Gerais                 | 4     |
| Pará                         | 4     |
| Paraíba                      | 4     |
| Paraná                       | 4     |
| Pernambuco                   | 4     |
| Piauí                        | 4     |
| Rio de Janeiro               | 4     |
| Rio Grande do Norte          | 4     |
| Rio Grande do Sul            | 4     |
| Rondônia                     | 4     |
| Roraima                      | 4     |
| Santa Catarina               | 4     |
| São Paulo                    | 4     |
| Sergipe                      | 4     |
| Tocantins                    | 4     |
| Paraguay                     | 3     |
| North Africa and Middle East | 1     |
| North Africa and Middle East | 2     |
| Afghanistan                  | 3     |
| Algeria                      | 3     |
| Bahrain                      | 3     |
| Egypt                        | 3     |
| Iran                         | 3     |
| Iraq                         | 3     |
| Jordan                       | 3     |
| Kuwait                       | 3     |
| Lebanon                      | 3     |

**Appendix Table 2. GBD 2017 location hierarchy with levels**

| Geography            | Level |
|----------------------|-------|
| Libya                | 3     |
| Morocco              | 3     |
| Palestine            | 3     |
| Oman                 | 3     |
| Qatar                | 3     |
| Saudi Arabia         | 3     |
| Sudan                | 3     |
| Syria                | 3     |
| Tunisia              | 3     |
| Turkey               | 3     |
| United Arab Emirates | 3     |
| Yemen                | 3     |
| South Asia           | 1     |
| South Asia           | 2     |
| Bangladesh           | 3     |
| Bhutan               | 3     |
| India                | 3     |
| Andhra Pradesh       | 4     |
| Arunachal Pradesh    | 4     |
| Assam                | 4     |
| Bihar                | 4     |
| Chhattisgarh         | 4     |
| Delhi                | 4     |
| Goa                  | 4     |
| Gujarat              | 4     |
| Haryana              | 4     |
| Himachal Pradesh     | 4     |
| Jammu and Kashmir    | 4     |
| Jharkhand            | 4     |
| Karnataka            | 4     |
| Kerala               | 4     |
| Madhya Pradesh       | 4     |
| Maharashtra          | 4     |
| Manipur              | 4     |
| Meghalaya            | 4     |
| Mizoram              | 4     |
| Nagaland             | 4     |
| Odisha               | 4     |
| Punjab               | 4     |
| Rajasthan            | 4     |
| Sikkim               | 4     |
| Tamil Nadu           | 4     |
| Telangana            | 4     |
| Tripura              | 4     |
| Uttar Pradesh        | 4     |

**Appendix Table 2. GBD 2017 location hierarchy with levels**

| Geography                              | Level |
|----------------------------------------|-------|
| Uttarakhand                            | 4     |
| West Bengal                            | 4     |
| Union Territories other than Delhi     | 4     |
| Nepal                                  | 3     |
| Pakistan                               | 3     |
| Southeast Asia, East Asia, and Oceania | 1     |
| East Asia                              | 2     |
| China                                  | 3     |
| North Korea                            | 3     |
| Taiwan                                 | 3     |
| Oceania                                | 2     |
| American Samoa                         | 3     |
| Federated States of Micronesia         | 3     |
| Fiji                                   | 3     |
| Guam                                   | 3     |
| Kiribati                               | 3     |
| Marshall Islands                       | 3     |
| Northern Mariana Islands               | 3     |
| Papua New Guinea                       | 3     |
| Samoa                                  | 3     |
| Solomon Islands                        | 3     |
| Tonga                                  | 3     |
| Vanuatu                                | 3     |
| Southeast Asia                         | 2     |
| Cambodia                               | 3     |
| Indonesia                              | 3     |
| Laos                                   | 3     |
| Malaysia                               | 3     |
| Maldives                               | 3     |
| Mauritius                              | 3     |
| Myanmar                                | 3     |
| Philippines                            | 3     |
| Sri Lanka                              | 3     |
| Seychelles                             | 3     |
| Thailand                               | 3     |
| Timor-Leste                            | 3     |
| Vietnam                                | 3     |
| Sub-Saharan Africa                     | 1     |
| Central Sub-Saharan Africa             | 2     |
| Angola                                 | 3     |
| Central African Republic               | 3     |
| Congo                                  | 3     |
| Democratic Republic of the Congo       | 3     |
| Equatorial Guinea                      | 3     |
| Gabon                                  | 3     |



**Appendix Table 2. GBD 2017 location hierarchy with levels**

| <b>Geography</b>           | <b>Level</b> |
|----------------------------|--------------|
| Eastern Sub-Saharan Africa | 2            |
| Burundi                    | 3            |
| Comoros                    | 3            |
| Djibouti                   | 3            |
| Eritrea                    | 3            |
| Ethiopia                   | 3            |
| Kenya                      | 3            |
| Baringo                    | 4            |
| Bomet                      | 4            |
| Bungoma                    | 4            |
| Busia                      | 4            |
| Elgeyo-Marakwet            | 4            |
| Embu                       | 4            |
| Garissa                    | 4            |
| HomaBay                    | 4            |
| Isiolo                     | 4            |
| Kajiado                    | 4            |
| Kakamega                   | 4            |
| Kericho                    | 4            |
| Kiambu                     | 4            |
| Kilifi                     | 4            |
| Kirinyaga                  | 4            |
| Kisii                      | 4            |
| Kisumu                     | 4            |
| Kitui                      | 4            |
| Kwale                      | 4            |
| Laikipia                   | 4            |
| Lamu                       | 4            |
| Machakos                   | 4            |
| Makueni                    | 4            |
| Mandera                    | 4            |
| Marsabit                   | 4            |
| Meru                       | 4            |
| Migori                     | 4            |
| Mombasa                    | 4            |
| Murang'a                   | 4            |
| Nairobi                    | 4            |
| Nakuru                     | 4            |
| Nandi                      | 4            |
| Narok                      | 4            |
| Nyamira                    | 4            |
| Nyandarua                  | 4            |
| Nyeri                      | 4            |
| Samburu                    | 4            |
| Siaya                      | 4            |

**Appendix Table 2. GBD 2017 location hierarchy with levels**

| Geography                   | Level |
|-----------------------------|-------|
| Taita Taveta                | 4     |
| Tana River                  | 4     |
| Tharaka Nithi               | 4     |
| Trans Nzoia                 | 4     |
| Turkana                     | 4     |
| Uasin Gishu                 | 4     |
| Vihiga                      | 4     |
| Wajir                       | 4     |
| West Pokot                  | 4     |
| Madagascar                  | 3     |
| Malawi                      | 3     |
| Mozambique                  | 3     |
| Rwanda                      | 3     |
| Somalia                     | 3     |
| South Sudan                 | 3     |
| Tanzania                    | 3     |
| Uganda                      | 3     |
| Zambia                      | 3     |
| Southern Sub-Saharan Africa | 2     |
| Botswana                    | 3     |
| Lesotho                     | 3     |
| Namibia                     | 3     |
| South Africa                | 3     |
| Swaziland                   | 3     |
| Zimbabwe                    | 3     |
| Western Sub-Saharan Africa  | 2     |
| Benin                       | 3     |
| Burkina Faso                | 3     |
| Cameroon                    | 3     |
| Cape Verde                  | 3     |
| Chad                        | 3     |
| Cote d'Ivoire               | 3     |
| The Gambia                  | 3     |
| Ghana                       | 3     |
| Guinea                      | 3     |
| Guinea-Bissau               | 3     |
| Liberia                     | 3     |
| Mali                        | 3     |
| Mauritania                  | 3     |
| Niger                       | 3     |
| Nigeria                     | 3     |
| Sao Tome and Principe       | 3     |
| Senegal                     | 3     |
| Sierra Leone                | 3     |
| Togo                        | 3     |

Appendix Table 3. Total number of site years by cause and source type for GBD 2017

| Cause                                                              | Level | Vital Registration | Vital Registration - Sample | Verbal Autopsy | Surveillance | Survey/Census | Sibling History | Cancer Registry | Police Records |
|--------------------------------------------------------------------|-------|--------------------|-----------------------------|----------------|--------------|---------------|-----------------|-----------------|----------------|
| All causes                                                         | 0     | 19377              | 793                         | 3095           | 2261         | 1144          | 4746            | 5545            | 1567           |
| Communicable, maternal, neonatal, and nutritional diseases         | 1     | 19377              | 793                         | 2773           | 2261         | 1078          | 4746            |                 |                |
| HIV/AIDS and sexually transmitted infections                       | 2     | 19331              | 793                         | 527            | 411          |               |                 |                 |                |
| HIV/AIDS                                                           | 3     | 19290              | 793                         | 477            | 411          |               |                 |                 |                |
| HIV/AIDS - Drug-susceptible Tuberculosis                           | 4     | 9706               | 416                         |                | 11           |               |                 |                 |                |
| HIV/AIDS resulting in other diseases                               | 4     | 16206              | 416                         |                | 58           |               |                 |                 |                |
| Sexually transmitted diseases excluding HIV                        | 3     | 19325              | 793                         | 405            | 239          |               |                 |                 |                |
| Syphilis                                                           | 4     | 18852              | 793                         |                | 239          |               |                 |                 |                |
| Chlamydial infection                                               | 4     | 17624              | 416                         |                |              |               |                 |                 |                |
| Gonococcal infection                                               | 4     | 18551              | 793                         |                |              |               |                 |                 |                |
| Other sexually transmitted diseases                                | 4     | 18840              | 416                         |                |              |               |                 |                 |                |
| Respiratory infections and tuberculosis                            | 2     | 19343              | 793                         | 1790           | 560          |               |                 |                 |                |
| Tuberculosis                                                       | 3     | 19343              | 793                         | 1543           | 360          |               |                 |                 |                |
| Drug-susceptible tuberculosis                                      | 4     | 16189              | 416                         |                |              |               |                 |                 |                |
| Multidrug-resistant tuberculosis without extensive drug resistance | 4     | 9646               | 416                         |                |              |               |                 |                 |                |
| Lower respiratory infections                                       | 3     | 19343              | 793                         | 1748           | 560          |               |                 |                 |                |
| Influenza                                                          | 4     | 16471              | 416                         |                |              |               |                 |                 |                |
| Pneumococcal pneumonia                                             | 4     | 16331              | 416                         |                |              |               |                 |                 |                |
| H influenzae type B pneumonia                                      | 4     | 16331              | 416                         |                |              |               |                 |                 |                |
| Respiratory syncytial virus pneumonia                              | 4     | 16189              | 416                         |                |              |               |                 |                 |                |
| Other lower respiratory infections                                 | 4     | 16331              | 416                         |                |              |               |                 |                 |                |
| Upper respiratory infections                                       | 3     | 18434              | 793                         |                |              |               |                 |                 |                |
| Otitis media                                                       | 3     | 17865              | 793                         | 150            |              |               |                 |                 |                |
| Enteric infections                                                 | 2     | 19343              | 793                         | 1744           | 509          |               |                 |                 |                |
| Diarrheal diseases                                                 | 3     | 19343              | 793                         | 1735           | 509          |               |                 |                 |                |
| Cholera                                                            | 4     | 16508              | 416                         |                |              |               |                 |                 |                |
| Other salmonella infections                                        | 4     | 16511              | 416                         |                |              |               |                 |                 |                |
| Shigellosis                                                        | 4     | 16333              | 416                         |                |              |               |                 |                 |                |
| Enteropathogenic E coli infection                                  | 4     | 9649               | 416                         |                |              |               |                 |                 |                |
| Enterotoxigenic E coli infection                                   | 4     | 9649               | 416                         |                |              |               |                 |                 |                |
| Campylobacter enteritis                                            | 4     | 9649               | 416                         |                |              |               |                 |                 |                |
| Amoebiasis                                                         | 4     | 16330              | 416                         |                |              |               |                 |                 |                |
| Cryptosporidiosis                                                  | 4     | 16189              | 416                         |                |              |               |                 |                 |                |
| Rotaviral enteritis                                                | 4     | 9649               | 416                         |                |              |               |                 |                 |                |
| Aeromonas                                                          | 4     | 6540               | 416                         |                |              |               |                 |                 |                |
| Chloridium difficile                                               | 4     | 16331              | 416                         |                |              |               |                 |                 |                |
| Norovirus                                                          | 4     | 9649               | 416                         |                |              |               |                 |                 |                |
| Adenovirus                                                         | 4     | 9649               | 416                         |                |              |               |                 |                 |                |
| Other bacterial foodborne diarrhea                                 | 4     | 16353              | 416                         |                |              |               |                 |                 |                |
| Other diarrheal diseases                                           | 4     | 16471              | 416                         |                |              |               |                 |                 |                |
| Typhoid and paratyphoid                                            | 3     | 19324              | 793                         | 420            |              |               |                 |                 |                |
| Typhoid fever                                                      | 4     | 17673              | 416                         |                |              |               |                 |                 |                |
| Paratyphoid fever                                                  | 4     | 17043              | 416                         |                |              |               |                 |                 |                |
| Invasive Non-typhoidal Salmonella (NTS)                            | 3     | 17239              | 416                         |                |              |               |                 |                 |                |
| Pulmonary tuberculosis                                             | 3     | 18262              | 416                         | 146            |              |               |                 |                 |                |
| Other intestinal infectious diseases                               | 3     | 18262              | 416                         | 146            |              |               |                 |                 |                |
| Neglected tropical diseases and malaria                            | 2     | 19347              | 793                         | 1525           | 289          |               |                 |                 |                |
| Malaria                                                            | 3     | 19289              | 793                         | 1388           | 1            |               |                 |                 |                |
| Chagas disease                                                     | 3     | 6494               | 325                         |                |              |               |                 |                 |                |
| Leishmaniasis                                                      | 3     | 18689              | 793                         | 353            |              |               |                 |                 |                |
| Visceral leishmaniasis                                             | 4     | 18134              | 793                         | 353            |              |               |                 |                 |                |
| African trypanosomiasis                                            | 3     | 16957              | 416                         | 148            |              |               |                 |                 |                |
| Schistosomiasis                                                    | 3     | 17143              | 416                         |                |              |               |                 |                 |                |
| Cysticercosis                                                      | 3     | 18110              | 793                         |                |              |               |                 |                 |                |
| Cystic echinococcosis                                              | 3     | 18256              | 793                         |                |              |               |                 |                 |                |
| Dengue                                                             | 3     | 18434              | 416                         | 345            | 1            |               |                 |                 |                |
| Yellow fever                                                       | 3     | 17145              | 416                         | 160            |              |               |                 |                 |                |
| Rabies                                                             | 3     | 18997              | 793                         | 970            | 278          |               |                 |                 |                |
| Intestinal nematode infections                                     | 3     | 18841              | 793                         | 287            |              |               |                 |                 |                |
| Ascariasis                                                         | 4     | 10956              | 416                         |                |              |               |                 |                 |                |
| Hookworm                                                           | 3     | 248                | 42                          |                | 9            |               |                 |                 |                |
| Zika virus                                                         | 3     | 10274              | 416                         |                |              |               |                 |                 |                |
| Other neglected tropical diseases                                  | 3     | 17698              | 793                         |                |              |               |                 |                 |                |
| Other infectious diseases                                          | 2     | 19343              | 793                         | 1668           | 807          |               |                 |                 |                |
| Meningitis                                                         | 3     | 19331              | 793                         | 1470           | 546          |               |                 |                 |                |
| Pneumococcal meningitis                                            | 4     | 16753              | 416                         |                |              |               |                 |                 |                |
| H influenzae type B meningitis                                     | 4     | 16760              | 416                         |                |              |               |                 |                 |                |
| Meningococcal meningitis                                           | 4     | 17964              | 416                         |                |              |               |                 |                 |                |
| Other meningitis                                                   | 4     | 16760              | 416                         |                |              |               |                 |                 |                |
| Encephalitis                                                       | 3     | 19028              | 793                         | 395            |              |               |                 |                 |                |
| Diphtheria                                                         | 3     | 19046              | 793                         |                |              |               |                 |                 |                |
| Whooping cough                                                     | 3     | 19337              | 793                         | 589            |              |               |                 |                 |                |
| Tetanus                                                            | 3     | 19198              | 793                         | 1295           | 393          |               |                 |                 |                |
| Measles                                                            | 3     | 19332              | 793                         | 1151           | 524          |               |                 |                 |                |
| Varicella and herpes zoster                                        | 3     | 18227              | 793                         | 377            |              |               |                 |                 |                |
| Acute hepatitis                                                    | 3     | 19336              | 793                         | 1189           |              |               |                 |                 |                |
| Acute hepatitis A                                                  | 4     | 16618              | 416                         |                |              |               |                 |                 |                |
| Acute hepatitis B                                                  | 4     | 16615              | 416                         |                |              |               |                 |                 |                |
| Acute hepatitis C                                                  | 4     | 16608              | 416                         |                |              |               |                 |                 |                |
| Acute hepatitis E                                                  | 4     | 10068              | 416                         |                |              |               |                 |                 |                |
| Other unspecified infectious diseases                              | 3     | 19053              | 793                         | 1089           | 804          |               |                 |                 |                |
| Maternal and neonatal disorders                                    | 2     | 19370              | 793                         | 2526           | 1903         | 1078          | 4746            |                 |                |
| Maternal disorders                                                 | 3     | 19367              | 793                         | 2120           | 1345         | 1078          | 4746            |                 |                |
| Maternal hemorrhage                                                | 4     | 19139              | 793                         | 1097           | 848          | 9             | 1               |                 |                |
| Maternal sepsis and other maternal infections                      | 4     | 18839              | 793                         | 804            | 544          | 7             | 1               |                 |                |
| Maternal hypertensive disorders                                    | 4     | 19144              | 793                         | 805            | 823          | 9             | 1               |                 |                |
| Maternal obstructed labor and uterine rupture                      | 4     | 18843              | 793                         | 800            | 615          | 8             | 1               |                 |                |
| Maternal abortion and miscarriage                                  | 4     | 19161              | 793                         | 333            | 400          | 7             | 1               |                 |                |
| Ectopic pregnancy                                                  | 4     | 18239              | 793                         | 70             | 515          |               | 1               |                 |                |
| Indirect maternal deaths                                           | 4     | 18822              | 793                         | 798            | 923          | 9             | 1               |                 |                |
| Late maternal deaths                                               | 4     | 10922              | 416                         |                | 152          |               |                 |                 |                |
| Maternal deaths aggravated by HIV/AIDS                             | 4     | 19367              | 793                         | 2120           | 1345         | 1078          | 4746            |                 |                |
| Other maternal disorders                                           | 4     | 18836              | 793                         | 290            | 771          | 4             | 1               |                 |                |
| Neonatal disorders                                                 | 3     | 19345              | 791                         | 1597           | 558          |               |                 |                 |                |
| Neonatal preterm birth                                             | 4     | 18225              | 791                         | 511            | 558          |               |                 |                 |                |
| Neonatal encephalopathy due to birth asphyxia and trauma           | 4     | 18218              | 791                         | 497            | 558          |               |                 |                 |                |
| Neonatal sepsis and other neonatal infections                      | 4     | 18175              | 791                         | 165            | 546          |               |                 |                 |                |
| Hemolytic disease and other neonatal jaundice                      | 4     | 18204              | 791                         | 347            |              |               |                 |                 |                |
| Other neonatal disorders                                           | 4     | 18205              | 791                         | 173            | 552          |               |                 |                 |                |
| Nutritional deficiencies                                           | 2     | 19343              | 793                         | 1414           | 523          |               |                 |                 |                |
| Protein-energy malnutrition                                        | 3     | 19002              | 793                         | 1366           |              |               |                 |                 |                |
| Dietary iron deficiency                                            | 3     |                    |                             | 741            |              |               |                 |                 |                |
| Other nutritional deficiencies                                     | 3     | 18223              | 793                         |                |              |               |                 |                 |                |
| Non-communicable diseases                                          | 1     | 19353              | 793                         | 1814           | 632          |               |                 | 5545            | 64             |
| Neoplasms                                                          | 2     | 19327              | 793                         | 1460           | 624          |               |                 | 5545            |                |
| Lip and oral cavity cancer                                         | 3     | 18987              | 793                         | 405            |              |               |                 | 4627            |                |
| Nasopharynx cancer                                                 | 3     | 18985              | 793                         |                |              |               |                 | 5490            |                |
| Other pharynx cancer                                               | 3     | 18985              | 793                         | 187            |              |               |                 | 5478            |                |
| Esophageal cancer                                                  | 3     | 19323              | 793                         | 419            |              |               |                 | 5497            |                |
| Stomach cancer                                                     | 3     | 19327              | 793                         | 187            |              |               |                 | 5518            |                |
| Colon and rectum cancer                                            | 3     | 19327              | 793                         | 432            |              |               |                 | 5518            |                |
| Liver cancer                                                       | 3     | 18989              | 793                         | 187            |              |               |                 | 5508            |                |
| Gallbladder and biliary tract cancer                               | 3     | 18392              | 793                         |                |              |               |                 | 5465            |                |
| Pancreatic cancer                                                  | 3     | 18986              | 793                         |                |              |               |                 | 5516            |                |
| Larynx cancer                                                      | 3     | 19323              | 793                         | 187            |              |               |                 | 5503            |                |
| Tracheal, bronchus, and lung cancer                                | 3     | 19327              | 793                         | 424            |              |               |                 | 5503            |                |
| Malignant skin melanoma                                            | 3     | 18987              | 793                         |                |              |               |                 | 5395            |                |
| Non-melanoma skin cancer                                           | 3     | 18994              | 793                         |                |              |               |                 |                 |                |
| Non-melanoma skin cancer (squamous-cell carcinoma)                 | 4     | 18393              | 793                         |                |              |               |                 |                 |                |
| Basal cancer                                                       | 3     | 19327              | 793                         | 445            | 1            |               |                 | 5507            |                |
| Cervical cancer                                                    | 3     | 19327              | 793                         | 183            |              |               |                 | 5334            |                |
| Uterine cancer                                                     | 3     | 19313              | 793                         | 185            |              |               |                 | 5382            |                |
| Ovarian cancer                                                     | 3     | 18983              | 793                         |                |              |               |                 | 5390            |                |
| Prostate cancer                                                    | 3     | 19324              | 793                         |                |              |               |                 | 5376            |                |
| Testicular cancer                                                  | 3     | 18262              | 793                         | 132            |              |               |                 | 5352            |                |
| Kidney cancer                                                      | 3     | 18983              | 793                         |                |              |               |                 | 5322            |                |
| Bladder cancer                                                     | 3     | 18985              | 793                         |                |              |               |                 | 5369            |                |

Appendix Table 3. Total number of site years by cause and source type for GBD 2017

| Cause                                                                  | Level | Vital Registration | Vital Registration - Sample | Verbal Autopsy | Surveillance | Survey/Census | Sibling History | Cancer Registry | Police Records |
|------------------------------------------------------------------------|-------|--------------------|-----------------------------|----------------|--------------|---------------|-----------------|-----------------|----------------|
| Brain and nervous system cancer                                        | 3     | 18986              | 793                         | 404            |              |               |                 | 5493            |                |
| Thyroid cancer                                                         | 3     | 10984              | 793                         |                |              |               |                 | 5501            |                |
| Melanoma                                                               | 3     | 10982              | 416                         |                |              |               |                 |                 |                |
| Hodgkin lymphoma                                                       | 3     | 18984              | 793                         |                |              |               |                 | 5437            |                |
| Non-Hodgkin lymphoma                                                   | 3     | 18986              | 793                         |                |              |               |                 | 5472            |                |
| Multiple myeloma                                                       | 3     | 18983              | 793                         |                |              |               |                 | 5464            |                |
| Leukemia                                                               | 3     | 19326              | 793                         | 187            | 551          |               |                 | 5511            |                |
| Acute lymphoid leukemia                                                | 4     | 16294              | 416                         |                |              |               |                 | 2649            |                |
| Chronic lymphoid leukemia                                              | 4     | 16214              | 403                         |                |              |               |                 | 2625            |                |
| Acute myeloid leukemia                                                 | 4     | 16288              | 416                         |                |              |               |                 | 3452            |                |
| Chronic myeloid leukemia                                               | 4     | 16288              | 416                         |                |              |               |                 | 2637            |                |
| Other leukemia                                                         | 4     | 16748              | 416                         |                |              |               |                 | 4436            |                |
| Other malignant neoplasms                                              | 3     | 19041              | 793                         | 403            | 72           |               |                 | 5524            |                |
| Other neoplasms                                                        | 3     | 16750              | 416                         |                |              |               |                 |                 |                |
| Myelodysplastic, myeloproliferative, and other hematopoietic neoplasms | 4     | 16608              | 416                         |                |              |               |                 |                 |                |
| Other benign and in situ neoplasms                                     | 4     | 16608              | 416                         |                |              |               |                 |                 |                |
| Cardiovascular diseases                                                | 2     | 19353              | 793                         | 1656           | 2            |               |                 |                 |                |
| Rheumatic heart disease                                                | 3     | 19329              | 793                         | 443            |              |               |                 |                 |                |
| Ischemic heart disease                                                 | 3     | 19341              | 793                         | 1514           |              |               |                 |                 |                |
| Stroke                                                                 | 3     | 19341              | 793                         | 1369           | 1            |               |                 |                 |                |
| Ischemic stroke                                                        | 4     | 18259              | 793                         |                |              |               |                 |                 |                |
| Intracerebral hemorrhage                                               | 4     | 18252              | 793                         |                |              |               |                 |                 |                |
| Subarachnoid hemorrhage                                                | 4     | 18252              | 793                         |                |              |               |                 |                 |                |
| Hypertensive heart disease                                             | 3     | 18275              | 793                         |                |              |               |                 |                 |                |
| Non-rheumatic valvular heart disease                                   | 3     | 17754              | 793                         |                |              |               |                 |                 |                |
| Non-rheumatic calcific aortic valve disease                            | 4     | 17199              | 416                         |                |              |               |                 |                 |                |
| Non-rheumatic degenerative mitral valve disease                        | 4     | 17199              | 416                         |                |              |               |                 |                 |                |
| Other non-rheumatic valve diseases                                     | 4     | 17199              | 416                         |                |              |               |                 |                 |                |
| Cardiomyopathy and myocarditis                                         | 3     | 18394              | 793                         |                |              |               |                 |                 |                |
| Myocarditis                                                            | 4     | 17193              | 416                         |                |              |               |                 |                 |                |
| Alcoholic cardiomyopathy                                               | 4     | 17193              | 416                         |                |              |               |                 |                 |                |
| Other cardiomyopathy                                                   | 4     | 17193              | 416                         |                |              |               |                 |                 |                |
| Atrial fibrillation and flutter                                        | 3     | 16753              | 416                         |                |              |               |                 |                 |                |
| Aortic aneurysm                                                        | 3     | 17634              | 416                         |                |              |               |                 |                 |                |
| Peripheral artery disease                                              | 3     | 16750              | 416                         |                |              |               |                 |                 |                |
| Endocarditis                                                           | 3     | 17625              | 793                         |                |              |               |                 |                 |                |
| Other cardiovascular and circulatory diseases                          | 3     | 18275              | 793                         | 405            |              |               |                 |                 |                |
| Chronic respiratory diseases                                           | 2     | 19343              | 793                         | 1568           | 517          |               |                 |                 |                |
| Chronic obstructive pulmonary disease                                  | 3     | 17641              | 793                         |                |              |               |                 |                 |                |
| Pneumoconiosis                                                         | 3     | 17621              | 416                         |                |              |               |                 |                 |                |
| Silicosis                                                              | 4     | 17624              | 416                         |                |              |               |                 |                 |                |
| Asbestosis                                                             | 4     | 17624              | 416                         |                |              |               |                 |                 |                |
| Coal workers pneumoconiosis                                            | 4     | 17482              | 416                         |                |              |               |                 |                 |                |
| Other pneumoconiosis                                                   | 4     | 17624              | 416                         |                |              |               |                 |                 |                |
| Asthma                                                                 | 3     | 17621              | 416                         |                |              |               |                 |                 |                |
| Interstitial lung disease and pulmonary sarcoidosis                    | 3     | 17624              | 416                         |                |              |               |                 |                 |                |
| Other chronic respiratory diseases                                     | 3     | 17631              | 793                         |                |              |               |                 |                 |                |
| Digestive diseases                                                     | 2     | 19329              | 793                         | 1406           | 546          |               |                 |                 |                |
| Cirrhosis and other chronic liver diseases                             | 3     | 19329              | 793                         | 1263           |              |               |                 |                 |                |
| Upper digestive system diseases                                        | 3     | 19315              | 793                         | 347            |              |               |                 |                 |                |
| Peptic ulcer disease                                                   | 4     | 17939              | 416                         |                |              |               |                 |                 |                |
| Gastritis and duodenitis                                               | 4     | 17924              | 416                         |                |              |               |                 |                 |                |
| Appendicitis                                                           | 3     | 19325              | 793                         | 187            |              |               |                 |                 |                |
| Paralytic ileus and intestinal obstruction                             | 3     | 18984              | 793                         | 378            |              |               |                 |                 |                |
| Inguinal, femoral, and abdominal hernia                                | 3     | 18554              | 416                         | 679            |              |               |                 |                 |                |
| Inflammatory bowel disease                                             | 3     | 17628              | 416                         |                |              |               |                 |                 |                |
| Vascular intestinal disorders                                          | 3     | 17621              | 416                         |                |              |               |                 |                 |                |
| Gallbladder and biliary diseases                                       | 3     | 19149              | 793                         |                |              |               |                 |                 |                |
| Pancreatitis                                                           | 3     | 17933              | 416                         |                |              |               |                 |                 |                |
| Other digestive diseases                                               | 3     | 18850              | 793                         |                |              |               |                 |                 |                |
| Neurological disorders                                                 | 2     | 19284              | 793                         | 920            |              |               |                 |                 |                |
| Alzheimer disease and other dementias                                  | 3     | 18986              | 793                         | 32             |              |               |                 |                 |                |
| Parkinson disease                                                      | 3     | 18119              | 793                         |                |              |               |                 |                 |                |
| Epilepsy                                                               | 3     | 19148              | 793                         | 918            |              |               |                 |                 |                |
| Multiple sclerosis                                                     | 3     | 18382              | 744                         |                |              |               |                 |                 |                |
| Motor neuron disease                                                   | 3     | 16750              | 416                         |                |              |               |                 |                 |                |
| Other neurological disorders                                           | 3     | 17628              | 416                         |                |              |               |                 |                 |                |
| Mental disorders                                                       | 2     | 17057              | 793                         |                |              |               |                 |                 |                |
| Eating disorders                                                       | 3     | 14044              | 351                         |                |              |               |                 |                 |                |
| Anorexia nervosa                                                       | 4     | 12755              | 351                         |                |              |               |                 |                 |                |
| Bulimia nervosa                                                        | 4     | 2177               | 65                          |                |              |               |                 |                 |                |
| Substance use disorders                                                | 2     | 19261              | 793                         | 317            |              |               |                 |                 | 64             |
| Alcohol use disorders                                                  | 3     | 19261              | 793                         | 315            |              |               |                 |                 |                |
| Drug use disorders                                                     | 3     | 19260              | 793                         | 302            |              |               |                 |                 | 64             |
| Opioid use disorders                                                   | 4     | 17202              | 416                         |                |              |               |                 |                 |                |
| Cocaine use disorders                                                  | 4     | 17202              | 416                         |                |              |               |                 |                 |                |
| Amphetamine use disorders                                              | 4     | 17202              | 416                         |                |              |               |                 |                 |                |
| Other drug use disorders                                               | 4     | 17202              | 416                         |                |              |               |                 |                 |                |
| Diabetes and kidney diseases                                           | 2     | 19329              | 793                         | 1494           |              |               |                 |                 |                |
| Diabetes mellitus                                                      | 3     | 19329              | 793                         | 1261           |              |               |                 |                 |                |
| Diabetes mellitus type 1                                               | 4     | 17482              | 416                         |                |              |               |                 |                 |                |
| Diabetes mellitus type 2                                               | 4     | 17479              | 416                         |                |              |               |                 |                 |                |
| Chronic kidney disease                                                 | 3     | 19329              | 793                         | 1402           |              |               |                 |                 |                |
| Chronic kidney disease due to diabetes mellitus type 1                 | 4     | 16611              | 416                         |                |              |               |                 |                 |                |
| Chronic kidney disease due to diabetes mellitus type 2                 | 4     | 16611              | 416                         |                |              |               |                 |                 |                |
| Chronic kidney disease due to hypertension                             | 4     | 16331              | 416                         |                |              |               |                 |                 |                |
| Chronic kidney disease due to glomerulonephritis                       | 4     | 16331              | 416                         |                |              |               |                 |                 |                |
| Chronic kidney disease due to other causes                             | 4     | 16331              | 416                         |                |              |               |                 |                 |                |
| Acute glomerulonephritis                                               | 3     | 19348              | 793                         |                |              |               |                 |                 |                |
| Skin and subcutaneous diseases                                         | 2     | 19302              | 793                         | 421            |              |               |                 |                 |                |
| Bacterial skin diseases                                                | 3     | 18977              | 793                         | 389            |              |               |                 |                 |                |
| Cellulitis                                                             | 4     | 16753              | 416                         |                |              |               |                 |                 |                |
| Pyoderma                                                               | 4     | 16755              | 416                         |                |              |               |                 |                 |                |
| Decubitus ulcer                                                        | 3     | 17621              | 416                         | 221            |              |               |                 |                 |                |
| Other skin and subcutaneous diseases                                   | 3     | 16750              | 416                         |                |              |               |                 |                 |                |
| Musculoskeletal disorders                                              | 2     | 18983              | 793                         | 404            |              |               |                 |                 |                |
| Rheumatoid arthritis                                                   | 3     | 17621              | 793                         |                |              |               |                 |                 |                |
| Other musculoskeletal disorders                                        | 3     | 17622              | 793                         |                |              |               |                 |                 |                |
| Other non-communicable diseases                                        | 2     | 19353              | 793                         | 1433           | 559          |               |                 |                 |                |
| Congenital birth defects                                               | 3     | 19353              | 793                         | 1342           | 559          |               |                 |                 |                |
| Neural tube defects                                                    | 4     | 19176              | 793                         | 104            | 548          |               |                 |                 |                |
| Congenital heart anomalies                                             | 4     | 19173              | 793                         | 424            | 557          |               |                 |                 |                |
| Orofacial clefts                                                       | 4     | 17277              | 416                         |                |              |               |                 |                 |                |
| Down syndrome                                                          | 4     | 17628              | 416                         |                | 540          |               |                 |                 |                |
| Other chromosomal abnormalities                                        | 4     | 17621              | 416                         |                |              |               |                 |                 |                |
| Congenital musculoskeletal and limb anomalies                          | 4     | 16608              | 416                         |                |              |               |                 |                 |                |
| Urogenital congenital anomalies                                        | 4     | 16753              | 416                         |                | 481          |               |                 |                 |                |
| Digestive congenital anomalies                                         | 4     | 16750              | 416                         |                |              |               |                 |                 |                |
| Other congenital birth defects                                         | 4     | 17621              | 793                         | 370            |              |               |                 |                 |                |
| Urinary diseases and male infertility                                  | 3     | 19323              | 793                         | 405            |              |               |                 |                 |                |
| Urinary tract infections                                               | 4     | 18694              | 793                         | 183            |              |               |                 |                 |                |
| Urolithiasis                                                           | 4     | 17639              | 793                         | 170            |              |               |                 |                 |                |
| Other urinary diseases                                                 | 4     | 16755              | 793                         |                |              |               |                 |                 |                |
| Gynecological diseases                                                 | 3     | 19129              | 793                         | 671            |              |               |                 |                 |                |
| Uterine fibroids                                                       | 4     | 16753              | 416                         | 101            |              |               |                 |                 |                |
| Polycystic ovarian syndrome                                            | 4     | 16567              | 416                         |                |              |               |                 |                 |                |
| Endometriosis                                                          | 4     | 16885              | 416                         |                |              |               |                 |                 |                |
| Genital prolapse                                                       | 4     | 16750              | 416                         |                |              |               |                 |                 |                |
| Other gynecological diseases                                           | 4     | 16611              | 416                         |                |              |               |                 |                 |                |
| Hemoglobinopathies and hemolytic anemias                               | 3     | 19307              | 793                         | 1059           |              |               |                 |                 |                |
| Thalassemias                                                           | 4     | 17931              | 793                         | 214            |              |               |                 |                 |                |
| Sickle cell disorders                                                  | 4     | 17631              | 793                         | 416            |              |               |                 |                 |                |
| G6PD deficiency                                                        | 4     | 6390               | 351                         |                |              |               |                 |                 |                |
| Other hemoglobinopathies and hemolytic anemias                         | 4     | 17628              | 793                         |                |              |               |                 |                 |                |
| Endocrine, metabolic, blood, and immune disorders                      | 3     | 19311              | 793                         | 776            |              |               |                 |                 |                |
| Sudden infant death syndrome                                           | 3     | 14934              | 39                          |                |              |               |                 |                 |                |
| Injuries                                                               | 1     | 19329              | 793                         | 1852           | 562          | 292           |                 |                 | 1567           |

Appendix Table 3. Total number of site years by cause and source type for GBD 2017

| Cause                                           | Level | Vital Registration | Vital Registration - Sample | Verbal Autopsy | Surveillance | Survey/Census | Sibling History | Cancer Registry | Police Records |
|-------------------------------------------------|-------|--------------------|-----------------------------|----------------|--------------|---------------|-----------------|-----------------|----------------|
| Transport injuries                              | 2     | 19329              | 793                         | 1464           |              | 557           |                 |                 | 75             |
| Road injuries                                   | 3     | 18563              | 793                         | 188            |              |               | 265             |                 | 75             |
| Pedestrian road injuries                        | 4     | 16753              | 416                         | 188            |              |               | 13              |                 | 70             |
| Cyclist road injuries                           | 4     | 16753              | 416                         | 188            |              |               |                 |                 | 45             |
| Motorcyclist road injuries                      | 4     | 16753              | 416                         | 187            |              |               | 2               |                 | 52             |
| Motor vehicle road injuries                     | 4     | 16753              | 416                         | 188            |              |               | 9               |                 | 63             |
| Other road injuries                             | 4     | 16753              | 416                         | 188            |              |               |                 |                 | 31             |
| Other transport injuries                        | 3     | 17392              | 416                         | 188            |              |               |                 |                 | 2              |
| Unintentional injuries                          | 2     | 19327              | 793                         | 1588           | 558          |               | 13              |                 | 223            |
| Falls                                           | 3     | 19327              | 793                         | 1492           | 554          |               | 5               |                 | 223            |
| Drowning                                        | 3     | 19315              | 793                         | 1357           | 553          |               | 2               |                 | 191            |
| Fire, heat, and hot substances                  | 3     | 19326              | 793                         | 1344           |              |               | 1               |                 | 188            |
| Poisonings                                      | 3     | 19286              | 793                         | 456            | 523          |               |                 |                 | 188            |
| Poisoning by carbon monoxide                    | 4     | 18487              | 793                         | 129            |              |               |                 |                 | 188            |
| Poisoning by other means                        | 4     | 16563              | 793                         |                |              |               |                 |                 |                |
| Exposure to mechanical forces                   | 3     | 19038              | 793                         | 380            | 558          |               | 8               |                 |                |
| Unintentional firearm injuries                  | 4     | 17973              | 793                         | 358            |              |               | 1               |                 |                |
| Other exposure to mechanical forces             | 4     | 17381              | 793                         | 373            | 558          |               | 4               |                 |                |
| Adverse effects of medical treatment            | 3     | 19026              | 793                         | 187            |              |               |                 |                 |                |
| Animal contact                                  | 3     | 18684              | 793                         | 1551           |              |               | 1               |                 |                |
| Venomous animal contact                         | 4     | 17660              | 793                         | 443            |              |               |                 |                 |                |
| Non-venomous animal contact                     | 4     | 16753              | 793                         |                |              |               |                 |                 |                |
| Foreign body                                    | 3     | 18395              | 793                         | 410            |              |               |                 |                 |                |
| Pulmonary aspiration and foreign body in airway | 4     | 16753              | 793                         | 181            |              |               |                 |                 |                |
| Foreign body in other body part                 | 4     | 16753              | 793                         |                |              |               |                 |                 |                |
| Environmental heat and cold exposure            | 3     | 18685              | 793                         | 338            |              |               |                 |                 |                |
| Exposure to forces of nature                    | 3     | 18998              | 793                         | 238            |              |               | 6               |                 |                |
| Other unintentional injuries                    | 3     | 18459              | 793                         | 413            |              |               | 1               |                 |                |
| Self-harm and interpersonal violence            | 2     | 19329              | 793                         | 1582           | 1            |               | 14              |                 | 1269           |
| Self-harm                                       | 3     | 19329              | 793                         | 1522           |              |               | 3               |                 |                |
| Self-harm by firearm                            | 4     | 16563              | 416                         |                |              |               |                 |                 |                |
| Self-harm by other specified means              | 4     | 16563              | 416                         |                |              |               |                 |                 |                |
| Interpersonal violence                          | 3     | 19329              | 793                         | 1331           |              |               | 9               |                 | 1269           |
| Physical violence by firearm                    | 4     | 16753              | 416                         | 352            |              |               | 5               |                 |                |
| Physical violence by sharp object               | 4     | 16753              | 416                         | 460            |              |               | 1               |                 |                |
| Physical violence by other means                | 4     | 16753              | 416                         | 359            |              |               |                 |                 |                |
| Conflict and terrorism                          | 3     | 18839              | 793                         | 341            |              |               | 3               |                 |                |
| Executions and police conflict                  | 3     | 18200              | 793                         | 156            |              |               |                 |                 |                |

**Appendix Table 4. List of International Classification of Diseases (ICD) codes mapped to the Global Burden of Disease cause list for causes of death**

| Cause                                                                         | ICD10                                                                                                                                                                                                                                                                                                                                                                                                                                                                                                                                                                                                                                                                                                                                                                                                                                                                                                                                                                                                                                                                                                                                                                             | ICD9                                                                                                                                                                                                                                                                                                                                                                                                                                                                                                                                                                                                                                                        |
|-------------------------------------------------------------------------------|-----------------------------------------------------------------------------------------------------------------------------------------------------------------------------------------------------------------------------------------------------------------------------------------------------------------------------------------------------------------------------------------------------------------------------------------------------------------------------------------------------------------------------------------------------------------------------------------------------------------------------------------------------------------------------------------------------------------------------------------------------------------------------------------------------------------------------------------------------------------------------------------------------------------------------------------------------------------------------------------------------------------------------------------------------------------------------------------------------------------------------------------------------------------------------------|-------------------------------------------------------------------------------------------------------------------------------------------------------------------------------------------------------------------------------------------------------------------------------------------------------------------------------------------------------------------------------------------------------------------------------------------------------------------------------------------------------------------------------------------------------------------------------------------------------------------------------------------------------------|
| Communicable, maternal, neonatal, and nutritional diseases                    | A00-A00.9, A01.0-A14, A15-A28.9, A32-A39.9, A48.1-A48.2, A48.4-A48.5, A50-A58, A60-A60.9, A63-A63.8, A65-A65.0, A68-A70, A74, A74.8-A75.9, A77-A96.9, A98-A98.8, B00-B06.9, B10-B10.8, B15-B17.9, B19-B27.9, B29.4, B33-B33.1, B33.3-B33.8, B47-B48.8, B50-B53.8, B55.0, B56-B57.5, B60-B60.8, B63, B65-B67.9, B69-B72.0, B74.3-B75, B77-B77.9, B83-B83.8, B90-B91, B94.1-B94.2, B95-B95.5, B97.4-B97.6, D50.1-D50.8, D51-D52.0, D52.8-D53.9, E00-E02, E40-E46.9, E51-E61.9, E63-E64.0, E64.2-E64.9, F07.1, G00.0-G00.8, G03-G03.8, G04-G05.8, G14-G14.6, G21.3, H70-H70.9, I00, I02, I02.9, I98.0-I98.1, J00-J02.8, J03-J03.8, J04-J04.2, J05-J05.1, J06.0-J06.8, J09-J15.8, J16-J16.9, J20-J21.9, J36-J36.0, K67.0-K67.8, K75.3, K76.3, K77.0, K93.0-K93.1, M03.1, M12.1, M49.0-M49.1, M73.0-M73.1, M89.6, N74.1, N96, N98-N98.9, O00-O07.9, O09-O16.9, O20-O26.9, O28-O36.9, O40-O48.1, O60-O77.9, O80-O92.7, O96-O98.6, O98.8-P04.2, P04.5-P05.9, P07-P15.9, P19-P22.9, P23.0-P23.4, P24-P29.9, P35-P37.2, P37.5-P39.9, P50-P61.9, P70-P70.1, P70.3-P72.9, P74-P78.9, P80-P81.9, P83-P84, P90-P94.9, P96, P96.3-P96.4, P96.8, R19.7, U04-U04.9, U06-U06.9, U82-U89, Z16-Z16.3 | 001-001.9, 002.0-029, 032-034.9, 036-036.3, 036.5-037.9, 040, 040.1-041.0, 042-066.9, 070-075.9, 078.3-078.7, 079-079.7, 080-083.9, 084.0-084.5, 084.7-084.9, 085.0, 086-088, 088.8-088.9, 090-101.6, 104-104.9, 120-124.9, 125.4-125.9, 127-127.1, 128-129.0, 136-136.2, 137-139.0, 244.2, 260-263.9, 265-269.9, 281.0-281.9, 320.0-320.8, 321-323.9, 381-383.9, 390-390.9, 392, 392.9, 425.6, 460-464.4, 464.8-464.9, 465.0-465.8, 466-469, 470.0, 475-475.9, 476.9, 480-482.8, 483.0-483.9, 484.0-484.7, 487-489, 630-636.9, 638-638.9, 640-679.1, 716.0, 730.4-730.6, 760-760.6, 760.8-768, 768.2-770, 770.1-775.0, 775.4-779.3, 779.6-779.8, V09-V09.9 |
| HIV/AIDS and sexually transmitted infections                                  | A50-A58, A60-A60.9, A63-A63.8, B20-B24.9, B63, I98.0, K67.0-K67.2, M03.1, M73.0-M73.1                                                                                                                                                                                                                                                                                                                                                                                                                                                                                                                                                                                                                                                                                                                                                                                                                                                                                                                                                                                                                                                                                             | 042-044.9, 054.1, 090-099.9                                                                                                                                                                                                                                                                                                                                                                                                                                                                                                                                                                                                                                 |
| HIV/AIDS                                                                      | B20-B24.9                                                                                                                                                                                                                                                                                                                                                                                                                                                                                                                                                                                                                                                                                                                                                                                                                                                                                                                                                                                                                                                                                                                                                                         | 042-044.9                                                                                                                                                                                                                                                                                                                                                                                                                                                                                                                                                                                                                                                   |
| HIV/AIDS – Drug-susceptible Tuberculosis                                      | B20.0                                                                                                                                                                                                                                                                                                                                                                                                                                                                                                                                                                                                                                                                                                                                                                                                                                                                                                                                                                                                                                                                                                                                                                             |                                                                                                                                                                                                                                                                                                                                                                                                                                                                                                                                                                                                                                                             |
| HIV/AIDS - Multidrug-resistant Tuberculosis without extensive drug resistance |                                                                                                                                                                                                                                                                                                                                                                                                                                                                                                                                                                                                                                                                                                                                                                                                                                                                                                                                                                                                                                                                                                                                                                                   |                                                                                                                                                                                                                                                                                                                                                                                                                                                                                                                                                                                                                                                             |
| HIV/AIDS - Extensively drug-resistant Tuberculosis                            |                                                                                                                                                                                                                                                                                                                                                                                                                                                                                                                                                                                                                                                                                                                                                                                                                                                                                                                                                                                                                                                                                                                                                                                   |                                                                                                                                                                                                                                                                                                                                                                                                                                                                                                                                                                                                                                                             |
| HIV/AIDS resulting in other diseases                                          | B20.1-B23.9, B24.0                                                                                                                                                                                                                                                                                                                                                                                                                                                                                                                                                                                                                                                                                                                                                                                                                                                                                                                                                                                                                                                                                                                                                                | 042-044.9                                                                                                                                                                                                                                                                                                                                                                                                                                                                                                                                                                                                                                                   |
| Sexually transmitted diseases excluding HIV                                   | A50-A58, A60-A60.9, A63-A63.8, B63, I98.0, K67.0-K67.2, M03.1, M73.0-M73.1                                                                                                                                                                                                                                                                                                                                                                                                                                                                                                                                                                                                                                                                                                                                                                                                                                                                                                                                                                                                                                                                                                        | 054.1, 090-099.9                                                                                                                                                                                                                                                                                                                                                                                                                                                                                                                                                                                                                                            |
| Syphilis                                                                      | A50-A53.9, I98.0, K67.2, M03.1, M73.1                                                                                                                                                                                                                                                                                                                                                                                                                                                                                                                                                                                                                                                                                                                                                                                                                                                                                                                                                                                                                                                                                                                                             | 090-097.9                                                                                                                                                                                                                                                                                                                                                                                                                                                                                                                                                                                                                                                   |
| Chlamydial infection                                                          | A55-A56.8, K67.0                                                                                                                                                                                                                                                                                                                                                                                                                                                                                                                                                                                                                                                                                                                                                                                                                                                                                                                                                                                                                                                                                                                                                                  | 099                                                                                                                                                                                                                                                                                                                                                                                                                                                                                                                                                                                                                                                         |
| Gonococcal infection                                                          | A54-A54.9, K67.1, M73.0                                                                                                                                                                                                                                                                                                                                                                                                                                                                                                                                                                                                                                                                                                                                                                                                                                                                                                                                                                                                                                                                                                                                                           | 098-098.9                                                                                                                                                                                                                                                                                                                                                                                                                                                                                                                                                                                                                                                   |
| Other sexually transmitted diseases                                           | A57-A58, A63-A63.8, B63                                                                                                                                                                                                                                                                                                                                                                                                                                                                                                                                                                                                                                                                                                                                                                                                                                                                                                                                                                                                                                                                                                                                                           | 099.0-099.9                                                                                                                                                                                                                                                                                                                                                                                                                                                                                                                                                                                                                                                 |
| Respiratory infections and tuberculosis                                       | A10-A14, A15-A19.9, A48.1, A70, B90-B90.9, B97.4-B97.6, H70-H70.9, J00-J02.8, J03-J03.8, J04-J04.2, J05-J05.1, J06.0-J06.8, J09-J15.8, J16-J16.9, J20-J21.9, J36-J36.0, K67.3, K93.0, M49.0, N74.1, P23.0-P23.4, P37.0, U04-U04.9, U84.3                                                                                                                                                                                                                                                                                                                                                                                                                                                                                                                                                                                                                                                                                                                                                                                                                                                                                                                                          | 010-019.9, 034.0, 079.6, 137-137.9, 138.0-138.9, 381-383.9, 460-464.4, 464.8-464.9, 465.0-465.8, 466-469, 470.0, 475-475.9, 476.9, 480-482.8, 483.0-483.9, 484.1-484.2, 484.6-484.7, 487-489, 730.4-730.6                                                                                                                                                                                                                                                                                                                                                                                                                                                   |
| Tuberculosis                                                                  | A15-A19.9, B90-B90.9, K67.3, K93.0, M49.0, N74.1, P37.0, U84.3                                                                                                                                                                                                                                                                                                                                                                                                                                                                                                                                                                                                                                                                                                                                                                                                                                                                                                                                                                                                                                                                                                                    | 010-019.9, 137-137.9, 138.0-138.9, 730.4-730.6                                                                                                                                                                                                                                                                                                                                                                                                                                                                                                                                                                                                              |
| Drug-susceptible tuberculosis                                                 | A15-A19.9, B90-B90.9, K67.3, K93.0, M49.0, N74.1, P37.0                                                                                                                                                                                                                                                                                                                                                                                                                                                                                                                                                                                                                                                                                                                                                                                                                                                                                                                                                                                                                                                                                                                           | 010-019.9, 137-137.9, 138.0-138.9, 730.4-730.6                                                                                                                                                                                                                                                                                                                                                                                                                                                                                                                                                                                                              |
| Multidrug-resistant tuberculosis without extensive drug resistance            | U84.3                                                                                                                                                                                                                                                                                                                                                                                                                                                                                                                                                                                                                                                                                                                                                                                                                                                                                                                                                                                                                                                                                                                                                                             |                                                                                                                                                                                                                                                                                                                                                                                                                                                                                                                                                                                                                                                             |
| Extensively drug-resistant tuberculosis                                       |                                                                                                                                                                                                                                                                                                                                                                                                                                                                                                                                                                                                                                                                                                                                                                                                                                                                                                                                                                                                                                                                                                                                                                                   |                                                                                                                                                                                                                                                                                                                                                                                                                                                                                                                                                                                                                                                             |
| Lower respiratory infections                                                  | A48.1, A70, B97.4-B97.6, J09-J15.8, J16-J16.9, J20-J21.9, P23.0-P23.4, U04-U04.9                                                                                                                                                                                                                                                                                                                                                                                                                                                                                                                                                                                                                                                                                                                                                                                                                                                                                                                                                                                                                                                                                                  | 079.6, 466-469, 470.0, 480-482.8, 483.0-483.9, 484.1-484.2, 484.6-484.7, 487-489                                                                                                                                                                                                                                                                                                                                                                                                                                                                                                                                                                            |
| Influenza                                                                     | J09-J11.8, U04-U04.9                                                                                                                                                                                                                                                                                                                                                                                                                                                                                                                                                                                                                                                                                                                                                                                                                                                                                                                                                                                                                                                                                                                                                              | 079.6, 487-489                                                                                                                                                                                                                                                                                                                                                                                                                                                                                                                                                                                                                                              |
| Pneumococcal pneumonia                                                        | J13-J13.9, J15.3-J15.4, J15.6                                                                                                                                                                                                                                                                                                                                                                                                                                                                                                                                                                                                                                                                                                                                                                                                                                                                                                                                                                                                                                                                                                                                                     | 481-481.9                                                                                                                                                                                                                                                                                                                                                                                                                                                                                                                                                                                                                                                   |
| H influenzae type B pneumonia                                                 | J14-J14.0                                                                                                                                                                                                                                                                                                                                                                                                                                                                                                                                                                                                                                                                                                                                                                                                                                                                                                                                                                                                                                                                                                                                                                         | 482.2                                                                                                                                                                                                                                                                                                                                                                                                                                                                                                                                                                                                                                                       |
| Respiratory syncytial virus pneumonia                                         | B97.4-B97.6, J12.1                                                                                                                                                                                                                                                                                                                                                                                                                                                                                                                                                                                                                                                                                                                                                                                                                                                                                                                                                                                                                                                                                                                                                                | 480.1                                                                                                                                                                                                                                                                                                                                                                                                                                                                                                                                                                                                                                                       |
| Other lower respiratory infections                                            | A48.1, A70, J12-J12.0, J12.2-J12.9, J15-J15.2, J15.5, J15.7-J15.8, J16-J16.9, J20-J21.9, P23.0-P23.4                                                                                                                                                                                                                                                                                                                                                                                                                                                                                                                                                                                                                                                                                                                                                                                                                                                                                                                                                                                                                                                                              | 466-469, 470.0, 480-480.0, 480.2-480.9, 482-482.1, 482.3-482.8, 483.0-483.9, 484.1-484.2, 484.6-484.7                                                                                                                                                                                                                                                                                                                                                                                                                                                                                                                                                       |
| Upper respiratory infections                                                  | J00-J02.8, J03-J03.8, J04-J04.2, J05-J05.1, J06.0-J06.8, J36-J36.0                                                                                                                                                                                                                                                                                                                                                                                                                                                                                                                                                                                                                                                                                                                                                                                                                                                                                                                                                                                                                                                                                                                | 034.0, 460-464.4, 464.8-464.9, 465.0-465.8, 475-475.9, 476.9                                                                                                                                                                                                                                                                                                                                                                                                                                                                                                                                                                                                |
| Otitis media                                                                  | H70-H70.9                                                                                                                                                                                                                                                                                                                                                                                                                                                                                                                                                                                                                                                                                                                                                                                                                                                                                                                                                                                                                                                                                                                                                                         | 381-383.9                                                                                                                                                                                                                                                                                                                                                                                                                                                                                                                                                                                                                                                   |
| Enteric infections                                                            | A00-A00.9, A01.0-A09.9, A80-A80.9, R19.7                                                                                                                                                                                                                                                                                                                                                                                                                                                                                                                                                                                                                                                                                                                                                                                                                                                                                                                                                                                                                                                                                                                                          | 001-001.9, 002.0-009.9, 045-045.9, 138                                                                                                                                                                                                                                                                                                                                                                                                                                                                                                                                                                                                                      |
| Diarrheal diseases                                                            | A00-A00.9, A02-A02.0, A02.8-A07, A07.2-A07.4, A08-A09.9, R19.7                                                                                                                                                                                                                                                                                                                                                                                                                                                                                                                                                                                                                                                                                                                                                                                                                                                                                                                                                                                                                                                                                                                    | 001-001.9, 003.8-006.9, 007.4-007.8, 008.2-009.9                                                                                                                                                                                                                                                                                                                                                                                                                                                                                                                                                                                                            |
| Cholera                                                                       | A00-A00.9                                                                                                                                                                                                                                                                                                                                                                                                                                                                                                                                                                                                                                                                                                                                                                                                                                                                                                                                                                                                                                                                                                                                                                         | 001-001.9                                                                                                                                                                                                                                                                                                                                                                                                                                                                                                                                                                                                                                                   |
| Other salmonella infections                                                   | A02-A02.0, A02.8-A02.9                                                                                                                                                                                                                                                                                                                                                                                                                                                                                                                                                                                                                                                                                                                                                                                                                                                                                                                                                                                                                                                                                                                                                            | 003.8-003.9                                                                                                                                                                                                                                                                                                                                                                                                                                                                                                                                                                                                                                                 |
| Shigellosis                                                                   | A03-A03.9                                                                                                                                                                                                                                                                                                                                                                                                                                                                                                                                                                                                                                                                                                                                                                                                                                                                                                                                                                                                                                                                                                                                                                         | 004-004.9                                                                                                                                                                                                                                                                                                                                                                                                                                                                                                                                                                                                                                                   |
| Enteropathogenic E coli infection                                             | A04.0                                                                                                                                                                                                                                                                                                                                                                                                                                                                                                                                                                                                                                                                                                                                                                                                                                                                                                                                                                                                                                                                                                                                                                             |                                                                                                                                                                                                                                                                                                                                                                                                                                                                                                                                                                                                                                                             |
| Enterotoxigenic E coli infection                                              | A04.1-A04.4                                                                                                                                                                                                                                                                                                                                                                                                                                                                                                                                                                                                                                                                                                                                                                                                                                                                                                                                                                                                                                                                                                                                                                       |                                                                                                                                                                                                                                                                                                                                                                                                                                                                                                                                                                                                                                                             |
| Campylobacter enteritis                                                       | A04.5                                                                                                                                                                                                                                                                                                                                                                                                                                                                                                                                                                                                                                                                                                                                                                                                                                                                                                                                                                                                                                                                                                                                                                             |                                                                                                                                                                                                                                                                                                                                                                                                                                                                                                                                                                                                                                                             |
| Amoebiasis                                                                    | A06-A06.9                                                                                                                                                                                                                                                                                                                                                                                                                                                                                                                                                                                                                                                                                                                                                                                                                                                                                                                                                                                                                                                                                                                                                                         | 006-006.9                                                                                                                                                                                                                                                                                                                                                                                                                                                                                                                                                                                                                                                   |
| Cryptosporidiosis                                                             | A07.2                                                                                                                                                                                                                                                                                                                                                                                                                                                                                                                                                                                                                                                                                                                                                                                                                                                                                                                                                                                                                                                                                                                                                                             | 007.4-007.7                                                                                                                                                                                                                                                                                                                                                                                                                                                                                                                                                                                                                                                 |
| Rotaviral enteritis                                                           | A08.0                                                                                                                                                                                                                                                                                                                                                                                                                                                                                                                                                                                                                                                                                                                                                                                                                                                                                                                                                                                                                                                                                                                                                                             |                                                                                                                                                                                                                                                                                                                                                                                                                                                                                                                                                                                                                                                             |
| Aeromonas                                                                     |                                                                                                                                                                                                                                                                                                                                                                                                                                                                                                                                                                                                                                                                                                                                                                                                                                                                                                                                                                                                                                                                                                                                                                                   | 008.2                                                                                                                                                                                                                                                                                                                                                                                                                                                                                                                                                                                                                                                       |
| Clostridium difficile                                                         | A04.7                                                                                                                                                                                                                                                                                                                                                                                                                                                                                                                                                                                                                                                                                                                                                                                                                                                                                                                                                                                                                                                                                                                                                                             |                                                                                                                                                                                                                                                                                                                                                                                                                                                                                                                                                                                                                                                             |
| Norovirus                                                                     | A08.1                                                                                                                                                                                                                                                                                                                                                                                                                                                                                                                                                                                                                                                                                                                                                                                                                                                                                                                                                                                                                                                                                                                                                                             |                                                                                                                                                                                                                                                                                                                                                                                                                                                                                                                                                                                                                                                             |
| Adenovirus                                                                    | A08.2                                                                                                                                                                                                                                                                                                                                                                                                                                                                                                                                                                                                                                                                                                                                                                                                                                                                                                                                                                                                                                                                                                                                                                             |                                                                                                                                                                                                                                                                                                                                                                                                                                                                                                                                                                                                                                                             |
| Other bacterial foodborne diarrhea                                            | A05-A05.9                                                                                                                                                                                                                                                                                                                                                                                                                                                                                                                                                                                                                                                                                                                                                                                                                                                                                                                                                                                                                                                                                                                                                                         | 005-005.9                                                                                                                                                                                                                                                                                                                                                                                                                                                                                                                                                                                                                                                   |
| Other diarrheal diseases                                                      | A04, A04.6, A04.8-A04.9, A07, A07.3-A07.4, A08, A08.3-A09.9, R19.7                                                                                                                                                                                                                                                                                                                                                                                                                                                                                                                                                                                                                                                                                                                                                                                                                                                                                                                                                                                                                                                                                                                | 007.8, 008.3-009.9                                                                                                                                                                                                                                                                                                                                                                                                                                                                                                                                                                                                                                          |
| Typhoid and paratyphoid                                                       | A01.0-A01.4                                                                                                                                                                                                                                                                                                                                                                                                                                                                                                                                                                                                                                                                                                                                                                                                                                                                                                                                                                                                                                                                                                                                                                       | 002.0-002.9                                                                                                                                                                                                                                                                                                                                                                                                                                                                                                                                                                                                                                                 |
| Typhoid fever                                                                 | A01.0                                                                                                                                                                                                                                                                                                                                                                                                                                                                                                                                                                                                                                                                                                                                                                                                                                                                                                                                                                                                                                                                                                                                                                             | 002.0                                                                                                                                                                                                                                                                                                                                                                                                                                                                                                                                                                                                                                                       |

| Cause                                         | ICD10                                                                                                                                                                                                                                                                                                                                                                                                                         | ICD9                                                                                                                                                                                                                                                                                                   |
|-----------------------------------------------|-------------------------------------------------------------------------------------------------------------------------------------------------------------------------------------------------------------------------------------------------------------------------------------------------------------------------------------------------------------------------------------------------------------------------------|--------------------------------------------------------------------------------------------------------------------------------------------------------------------------------------------------------------------------------------------------------------------------------------------------------|
| Paratyphoid fever                             | A01.1-A01.4                                                                                                                                                                                                                                                                                                                                                                                                                   | 002.1-002.9                                                                                                                                                                                                                                                                                            |
| Invasive Non-typhoidal Salmonella (iNTS)      | A02.1-A02.2                                                                                                                                                                                                                                                                                                                                                                                                                   | 003-003.7                                                                                                                                                                                                                                                                                              |
| Poliomyelitis                                 | A80-A80.9                                                                                                                                                                                                                                                                                                                                                                                                                     | 045-045.9, 138                                                                                                                                                                                                                                                                                         |
| Other intestinal infectious diseases          | A07.0-A07.1, A07.8-A07.9                                                                                                                                                                                                                                                                                                                                                                                                      | 007-007.3, 007.9-008.1                                                                                                                                                                                                                                                                                 |
| Neglected tropical diseases and malaria       | A68-A68.9, A69.2-A69.9, A75-A75.9, A77-A79.9, A82-A82.9, A90-A96.9, A98-A98.8, B33.0-B33.1, B50-B53.8, B55.0, B56-B57.5, B60-B60.8, B65-B67.9, B69-B72.0, B74.3-B75, B77-B77.9, B83-B83.8, K93.1, P37.1, U06-U06.9                                                                                                                                                                                                            | 060-061.8, 065-066.9, 071-071.9, 080-083.9, 084.0-084.5, 084.7-084.9, 085.0, 086-088, 088.8-088.9, 120-124.9, 125.4-125.9, 127-127.1, 128-129.0, 425.6                                                                                                                                                 |
| Malaria                                       | B50-B53.8                                                                                                                                                                                                                                                                                                                                                                                                                     | 084.0-084.5, 084.7-084.9                                                                                                                                                                                                                                                                               |
| Leprosy                                       | A30-A30.9                                                                                                                                                                                                                                                                                                                                                                                                                     | 030-030.9                                                                                                                                                                                                                                                                                              |
| Chagas disease                                | B57-B57.5, K93.1                                                                                                                                                                                                                                                                                                                                                                                                              | 086-086.2, 086.9, 425.6                                                                                                                                                                                                                                                                                |
| Leishmaniasis                                 | B55.0                                                                                                                                                                                                                                                                                                                                                                                                                         | 085.0                                                                                                                                                                                                                                                                                                  |
| Visceral leishmaniasis                        | B55.0                                                                                                                                                                                                                                                                                                                                                                                                                         | 085.0                                                                                                                                                                                                                                                                                                  |
| African trypanosomiasis                       | B56-B56.9                                                                                                                                                                                                                                                                                                                                                                                                                     | 086.3-086.5                                                                                                                                                                                                                                                                                            |
| Schistosomiasis                               | B65-B65.9                                                                                                                                                                                                                                                                                                                                                                                                                     | 120-120.9                                                                                                                                                                                                                                                                                              |
| Cysticercosis                                 | B69-B69.9                                                                                                                                                                                                                                                                                                                                                                                                                     | 123.1                                                                                                                                                                                                                                                                                                  |
| Cystic echinococcosis                         | B67-B67.4, B67.8-B67.9                                                                                                                                                                                                                                                                                                                                                                                                        | 122-122.4, 122.8-122.9                                                                                                                                                                                                                                                                                 |
| Dengue                                        | A90-A91.9                                                                                                                                                                                                                                                                                                                                                                                                                     | 061-061.8                                                                                                                                                                                                                                                                                              |
| Yellow fever                                  | A95-A95.9                                                                                                                                                                                                                                                                                                                                                                                                                     | 060-060.9                                                                                                                                                                                                                                                                                              |
| Rabies                                        | A82-A82.9                                                                                                                                                                                                                                                                                                                                                                                                                     | 071-071.9                                                                                                                                                                                                                                                                                              |
| Intestinal nematode infections                | B77-B77.9                                                                                                                                                                                                                                                                                                                                                                                                                     | 127.0                                                                                                                                                                                                                                                                                                  |
| Ascariasis                                    | B77-B77.9                                                                                                                                                                                                                                                                                                                                                                                                                     | 127.0                                                                                                                                                                                                                                                                                                  |
| Ebola                                         | A98.4                                                                                                                                                                                                                                                                                                                                                                                                                         |                                                                                                                                                                                                                                                                                                        |
| Zika virus                                    | U06-U06.9                                                                                                                                                                                                                                                                                                                                                                                                                     |                                                                                                                                                                                                                                                                                                        |
| Other neglected tropical diseases             | A68-A68.9, A69.2-A69.9, A75-A75.9, A77-A79.9, A92-A94.0, A96-A96.9, A98-A98.3, A98.5-A98.8, B33.0-B33.1, B60-B60.8, B67.5-B67.7, B70-B71.9, B74.3-B75, B83-B83.8, P37.1                                                                                                                                                                                                                                                       | 065-066.9, 080-083.9, 087-088, 088.8-088.9, 122.5-122.7, 123-123.0, 123.2-124.9, 125.4-125.6, 125.9, 127, 127.1, 128-129.0                                                                                                                                                                             |
| Other infectious diseases                     | A20-A28.9, A32-A39.9, A48.2, A48.4-A48.5, A65-A65.0, A69-A69.1, A74, A74.8-A74.9, A81-A81.9, A83-A89.9, B00-B06.9, B10-B10.8, B15-B17.9, B19-B19.9, B25-B27.9, B29.4, B33, B33.3-B33.8, B47-B48.8, B91, B94.1-B94.2, B95-B95.5, F07.1, G00.0-G00.8, G03-G03.8, G04-G05.8, G14-G14.6, G21.3, I00, I02, I02.9, I98.1, K67.8, K75.3, K76.3, K77.0, M49.1, M89.6, P35-P35.9, P37, P37.2, P37.5-P37.9, U82-U84, U85-U89, Z16-Z16.3 | 020-029, 032-034, 034.1-034.9, 036-036.3, 036.5-037.9, 040, 040.1-041.0, 046-054.0, 054.2-059.9, 062-064.9, 070-070.9, 072-075.9, 078.3-078.7, 079-079.5, 079.7, 100-101.6, 104-104.9, 136-136.2, 139-139.0, 320.0-320.8, 321-323.9, 390-390.9, 392, 392.9, 484.0, 484.3-484.5, 771.0-771.3, V09-V09.9 |
| Meningitis                                    | A39-A39.9, A87-A87.9, G00.0-G00.8, G03-G03.8                                                                                                                                                                                                                                                                                                                                                                                  | 036-036.3, 036.5-036.9, 047-049.9, 320.0-320.8, 321-322.9                                                                                                                                                                                                                                              |
| Pneumococcal meningitis                       | G00.1                                                                                                                                                                                                                                                                                                                                                                                                                         | 320.1                                                                                                                                                                                                                                                                                                  |
| H influenzae type B meningitis                | G00.0                                                                                                                                                                                                                                                                                                                                                                                                                         | 320.0                                                                                                                                                                                                                                                                                                  |
| Meningococcal meningitis                      | A39-A39.9                                                                                                                                                                                                                                                                                                                                                                                                                     | 036-036.3, 036.5-036.9                                                                                                                                                                                                                                                                                 |
| Other meningitis                              | A87-A87.9, G00.2-G00.8, G03-G03.8                                                                                                                                                                                                                                                                                                                                                                                             | 047-049.9, 320.2-320.8, 321-322.9                                                                                                                                                                                                                                                                      |
| Encephalitis                                  | A83-A86.4, B94.1, F07.1, G04-G05.8, G21.3                                                                                                                                                                                                                                                                                                                                                                                     | 062-064.9, 139.0, 323, 323.4-323.9                                                                                                                                                                                                                                                                     |
| Diphtheria                                    | A36-A36.9                                                                                                                                                                                                                                                                                                                                                                                                                     | 032-032.9                                                                                                                                                                                                                                                                                              |
| Whooping cough                                | A37-A37.9                                                                                                                                                                                                                                                                                                                                                                                                                     | 033-033.9, 484.3                                                                                                                                                                                                                                                                                       |
| Tetanus                                       | A33-A35.0                                                                                                                                                                                                                                                                                                                                                                                                                     | 037-037.9, 771.3                                                                                                                                                                                                                                                                                       |
| Measles                                       | B05-B05.9                                                                                                                                                                                                                                                                                                                                                                                                                     | 055-055.9, 484.0                                                                                                                                                                                                                                                                                       |
| Varicella and herpes zoster                   | B01-B02.9, P35.8                                                                                                                                                                                                                                                                                                                                                                                                              | 052-053.9                                                                                                                                                                                                                                                                                              |
| Acute hepatitis                               | B15-B17.9, B19-B19.9, B94.2, P35.3                                                                                                                                                                                                                                                                                                                                                                                            | 070-070.9                                                                                                                                                                                                                                                                                              |
| Acute hepatitis A                             | B15-B15.9                                                                                                                                                                                                                                                                                                                                                                                                                     | 070.0-070.1                                                                                                                                                                                                                                                                                            |
| Acute hepatitis B                             | B16-B16.9, B17.0, B19.1, P35.3                                                                                                                                                                                                                                                                                                                                                                                                | 070.2-070.3                                                                                                                                                                                                                                                                                            |
| Acute hepatitis C                             | B17.1, B19.2                                                                                                                                                                                                                                                                                                                                                                                                                  | 070.7                                                                                                                                                                                                                                                                                                  |
| Acute hepatitis E                             | B17.2                                                                                                                                                                                                                                                                                                                                                                                                                         |                                                                                                                                                                                                                                                                                                        |
| Other unspecified infectious diseases         | A20-A28.9, A32-A32.9, A38-A38.9, A48.2, A48.4-A48.5, A65-A65.0, A69-A69.1, A74, A74.8-A74.9, A81-A81.9, A88-A89.9, B00-B00.9, B03-B04, B06-B06.9, B10-B10.8, B25-B27.9, B29.4, B33, B33.3-B33.8, B47-B48.8, B91, B95-B95.5, G14-G14.6, I00, I02, I02.9, I98.1, K67.8, K75.3, K76.3, K77.0, M49.1, M89.6, P35-P35.2, P35.9, P37, P37.2, P37.5-P37.9, U82-U84, U85-U89, Z16-Z16.3                                               | 020-029, 034, 034.1-034.9, 040, 040.1-041.0, 046-046.9, 050-051.9, 054-054.0, 054.2-054.9, 056-059.9, 072-075.9, 078.3-078.7, 079-079.5, 079.7, 100-101.6, 104-104.9, 136-136.2, 139, 323.0-323.3, 390-390.9, 392, 392.9, 484.4-484.5, 771.0-771.2, V09-V09.9                                          |
| Maternal and neonatal disorders               | N96, N98-N98.9, O00-O07.9, O09-O16.9, O20-O26.9, O28-O36.9, O40-O48.1, O60-O77.9, O80-O92.7, O96-O98.6, O98.8-P04.2, P04.5-P05.9, P07-P15.9, P19-P22.9, P24-P29.9, P36-P36.9, P38-P39.9, P50-P61.9, P70-P70.1, P70.3-P72.9, P74-P78.9, P80-P81.9, P83-P84, P90-P94.9, P96, P96.3-P96.4, P96.8                                                                                                                                 | 630-636.9, 638-638.9, 640-679.1, 760-760.6, 760.8-768, 768.2-770, 770.1-771, 771.4-775.0, 775.4-779.3, 779.6-779.8                                                                                                                                                                                     |
| Maternal disorders                            | N96, N98-N98.9, O00-O07.9, O09-O16.9, O20-O26.9, O28-O36.9, O40-O48.1, O60-O77.9, O80-O92.7, O96-O98.6, O98.8-O99.9                                                                                                                                                                                                                                                                                                           | 630-636.9, 638-638.9, 640-679.1                                                                                                                                                                                                                                                                        |
| Maternal hemorrhage                           | O20-O20.9, O43.2, O44-O46.9, O62-O62.9, O67-O67.9, O70, O72-O72.3                                                                                                                                                                                                                                                                                                                                                             | 640-641.9, 661-661.9, 665, 666-666.9                                                                                                                                                                                                                                                                   |
| Maternal sepsis and other maternal infections | O23-O23.9, O85-O86.8, O91-O91.2                                                                                                                                                                                                                                                                                                                                                                                               | 659.3, 670-670.9                                                                                                                                                                                                                                                                                       |
| Maternal hypertensive disorders               | O10-O16.9                                                                                                                                                                                                                                                                                                                                                                                                                     | 642-642.9                                                                                                                                                                                                                                                                                              |
| Maternal obstructed labor and uterine rupture | O32-O33.9, O64-O66.9, O71-O71.9                                                                                                                                                                                                                                                                                                                                                                                               | 652-653.9, 660-660.9, 665.0-665.3                                                                                                                                                                                                                                                                      |
| Maternal abortion and miscarriage             | N96, O01-O07.9                                                                                                                                                                                                                                                                                                                                                                                                                | 630-632.9, 634-636.9, 638-638.9, 646.3                                                                                                                                                                                                                                                                 |
| Ectopic pregnancy                             | O00-O00.9                                                                                                                                                                                                                                                                                                                                                                                                                     | 633-633.9                                                                                                                                                                                                                                                                                              |

| Cause                                                    | ICD10                                                                                                                                                                                                                                                                                                                                                                                                                                                                                                                                                                                                                                                                                                                                                                                                                                                                                                                                                                                                                                                                                                                                                                                                                                                                                                                                                                                                                                                                                                                                                                                                                                                                                                                                                                                                                                                                                                                                                                                                                                                                                                                                                                                                                                                                                                                                                                                                                                                            | ICD9                                                                                                                                                                                                                                                                                                                                                                                                                                                                                                                                                                                                                                                                                                                                                                                                                                                                                                                                                                                                                                                                                                                                                                                                                                                                                                                                                                                                                                                                                                                                                                                                                                                                                                                                                                                                                                                                                                                                                   |
|----------------------------------------------------------|------------------------------------------------------------------------------------------------------------------------------------------------------------------------------------------------------------------------------------------------------------------------------------------------------------------------------------------------------------------------------------------------------------------------------------------------------------------------------------------------------------------------------------------------------------------------------------------------------------------------------------------------------------------------------------------------------------------------------------------------------------------------------------------------------------------------------------------------------------------------------------------------------------------------------------------------------------------------------------------------------------------------------------------------------------------------------------------------------------------------------------------------------------------------------------------------------------------------------------------------------------------------------------------------------------------------------------------------------------------------------------------------------------------------------------------------------------------------------------------------------------------------------------------------------------------------------------------------------------------------------------------------------------------------------------------------------------------------------------------------------------------------------------------------------------------------------------------------------------------------------------------------------------------------------------------------------------------------------------------------------------------------------------------------------------------------------------------------------------------------------------------------------------------------------------------------------------------------------------------------------------------------------------------------------------------------------------------------------------------------------------------------------------------------------------------------------------------|--------------------------------------------------------------------------------------------------------------------------------------------------------------------------------------------------------------------------------------------------------------------------------------------------------------------------------------------------------------------------------------------------------------------------------------------------------------------------------------------------------------------------------------------------------------------------------------------------------------------------------------------------------------------------------------------------------------------------------------------------------------------------------------------------------------------------------------------------------------------------------------------------------------------------------------------------------------------------------------------------------------------------------------------------------------------------------------------------------------------------------------------------------------------------------------------------------------------------------------------------------------------------------------------------------------------------------------------------------------------------------------------------------------------------------------------------------------------------------------------------------------------------------------------------------------------------------------------------------------------------------------------------------------------------------------------------------------------------------------------------------------------------------------------------------------------------------------------------------------------------------------------------------------------------------------------------------|
| Indirect maternal deaths                                 | O24-O25.3, O98-O98.6, O98.8-O99.9                                                                                                                                                                                                                                                                                                                                                                                                                                                                                                                                                                                                                                                                                                                                                                                                                                                                                                                                                                                                                                                                                                                                                                                                                                                                                                                                                                                                                                                                                                                                                                                                                                                                                                                                                                                                                                                                                                                                                                                                                                                                                                                                                                                                                                                                                                                                                                                                                                | 646-646.2, 646.4-649.9                                                                                                                                                                                                                                                                                                                                                                                                                                                                                                                                                                                                                                                                                                                                                                                                                                                                                                                                                                                                                                                                                                                                                                                                                                                                                                                                                                                                                                                                                                                                                                                                                                                                                                                                                                                                                                                                                                                                 |
| Late maternal deaths                                     | O96-O97.9                                                                                                                                                                                                                                                                                                                                                                                                                                                                                                                                                                                                                                                                                                                                                                                                                                                                                                                                                                                                                                                                                                                                                                                                                                                                                                                                                                                                                                                                                                                                                                                                                                                                                                                                                                                                                                                                                                                                                                                                                                                                                                                                                                                                                                                                                                                                                                                                                                                        |                                                                                                                                                                                                                                                                                                                                                                                                                                                                                                                                                                                                                                                                                                                                                                                                                                                                                                                                                                                                                                                                                                                                                                                                                                                                                                                                                                                                                                                                                                                                                                                                                                                                                                                                                                                                                                                                                                                                                        |
| Maternal deaths aggravated by HIV/AIDS                   |                                                                                                                                                                                                                                                                                                                                                                                                                                                                                                                                                                                                                                                                                                                                                                                                                                                                                                                                                                                                                                                                                                                                                                                                                                                                                                                                                                                                                                                                                                                                                                                                                                                                                                                                                                                                                                                                                                                                                                                                                                                                                                                                                                                                                                                                                                                                                                                                                                                                  |                                                                                                                                                                                                                                                                                                                                                                                                                                                                                                                                                                                                                                                                                                                                                                                                                                                                                                                                                                                                                                                                                                                                                                                                                                                                                                                                                                                                                                                                                                                                                                                                                                                                                                                                                                                                                                                                                                                                                        |
| Other maternal disorders                                 | N98-N98.9, O09-O09.9, O21-O22.9, O26-O26.9, O28-O31.8, O34-O36.9, O40-O43.1, O43.8-O43.9, O47-O48.1, O60-O61.9, O63-O63.9, O68-O69.9, O70.0-O70.9, O73-O77.9, O80-O84.9, O87-O90.9, O92-O92.7                                                                                                                                                                                                                                                                                                                                                                                                                                                                                                                                                                                                                                                                                                                                                                                                                                                                                                                                                                                                                                                                                                                                                                                                                                                                                                                                                                                                                                                                                                                                                                                                                                                                                                                                                                                                                                                                                                                                                                                                                                                                                                                                                                                                                                                                    | 643-645.2, 650-651.9, 654-659.2, 659.4-659.9, 662-664.9, 665.4-665.9, 667-669.9, 671-679.1                                                                                                                                                                                                                                                                                                                                                                                                                                                                                                                                                                                                                                                                                                                                                                                                                                                                                                                                                                                                                                                                                                                                                                                                                                                                                                                                                                                                                                                                                                                                                                                                                                                                                                                                                                                                                                                             |
| Neonatal disorders                                       | P00-P04.2, P04.5-P05.9, P07-P15.9, P19-P22.9, P24-P29.9, P36-P36.9, P38-P39.9, P50-P61.9, P70-P70.1, P70.3-P72.9, P74-P78.9, P80-P81.9, P83-P84, P90-P94.9, P96, P96.3-P96.4, P96.8                                                                                                                                                                                                                                                                                                                                                                                                                                                                                                                                                                                                                                                                                                                                                                                                                                                                                                                                                                                                                                                                                                                                                                                                                                                                                                                                                                                                                                                                                                                                                                                                                                                                                                                                                                                                                                                                                                                                                                                                                                                                                                                                                                                                                                                                              | 760-760.6, 760.8-768, 768.2-770, 770.1-771, 771.4-775.0, 775.4-779.3, 779.6-779.8                                                                                                                                                                                                                                                                                                                                                                                                                                                                                                                                                                                                                                                                                                                                                                                                                                                                                                                                                                                                                                                                                                                                                                                                                                                                                                                                                                                                                                                                                                                                                                                                                                                                                                                                                                                                                                                                      |
| Neonatal preterm birth                                   | P01.0-P01.1, P07-P07.3, P22-P22.9, P25-P28.9, P61.2, P77-P77.9                                                                                                                                                                                                                                                                                                                                                                                                                                                                                                                                                                                                                                                                                                                                                                                                                                                                                                                                                                                                                                                                                                                                                                                                                                                                                                                                                                                                                                                                                                                                                                                                                                                                                                                                                                                                                                                                                                                                                                                                                                                                                                                                                                                                                                                                                                                                                                                                   | 761.0-761.1, 765-765.9, 769-769.9, 770.2-770.9, 776.6, 777.5-777.6                                                                                                                                                                                                                                                                                                                                                                                                                                                                                                                                                                                                                                                                                                                                                                                                                                                                                                                                                                                                                                                                                                                                                                                                                                                                                                                                                                                                                                                                                                                                                                                                                                                                                                                                                                                                                                                                                     |
| Neonatal encephalopathy due to birth asphyxia and trauma | P01.7, P02-P03.9, P10-P15.9, P20-P21.9, P24-P24.9, P90-P91.9                                                                                                                                                                                                                                                                                                                                                                                                                                                                                                                                                                                                                                                                                                                                                                                                                                                                                                                                                                                                                                                                                                                                                                                                                                                                                                                                                                                                                                                                                                                                                                                                                                                                                                                                                                                                                                                                                                                                                                                                                                                                                                                                                                                                                                                                                                                                                                                                     | 761.7-763.9, 767-768, 768.2-768.9, 770.1, 772.1-772.9, 779.0-779.2                                                                                                                                                                                                                                                                                                                                                                                                                                                                                                                                                                                                                                                                                                                                                                                                                                                                                                                                                                                                                                                                                                                                                                                                                                                                                                                                                                                                                                                                                                                                                                                                                                                                                                                                                                                                                                                                                     |
| Neonatal sepsis and other neonatal infections            | P36-P36.9, P38-P39.9                                                                                                                                                                                                                                                                                                                                                                                                                                                                                                                                                                                                                                                                                                                                                                                                                                                                                                                                                                                                                                                                                                                                                                                                                                                                                                                                                                                                                                                                                                                                                                                                                                                                                                                                                                                                                                                                                                                                                                                                                                                                                                                                                                                                                                                                                                                                                                                                                                             | 771.4-771.9                                                                                                                                                                                                                                                                                                                                                                                                                                                                                                                                                                                                                                                                                                                                                                                                                                                                                                                                                                                                                                                                                                                                                                                                                                                                                                                                                                                                                                                                                                                                                                                                                                                                                                                                                                                                                                                                                                                                            |
| Hemolytic disease and other neonatal jaundice            | P55-P59.9                                                                                                                                                                                                                                                                                                                                                                                                                                                                                                                                                                                                                                                                                                                                                                                                                                                                                                                                                                                                                                                                                                                                                                                                                                                                                                                                                                                                                                                                                                                                                                                                                                                                                                                                                                                                                                                                                                                                                                                                                                                                                                                                                                                                                                                                                                                                                                                                                                                        | 773-774.9                                                                                                                                                                                                                                                                                                                                                                                                                                                                                                                                                                                                                                                                                                                                                                                                                                                                                                                                                                                                                                                                                                                                                                                                                                                                                                                                                                                                                                                                                                                                                                                                                                                                                                                                                                                                                                                                                                                                              |
| Other neonatal disorders                                 | P00-P01, P01.2-P01.6, P01.8-P01.9, P04-P04.2, P04.5-P05.9, P08-P09, P19-P19.9, P29-P29.9, P50-P54.9, P60-P61.1, P61.3-P61.9, P70-P70.1, P70.3-P72.9, P74-P76.9, P78-P78.9, P80-P81.9, P83-P84, P92-P94.9, P96, P96.3-P96.4, P96.8                                                                                                                                                                                                                                                                                                                                                                                                                                                                                                                                                                                                                                                                                                                                                                                                                                                                                                                                                                                                                                                                                                                                                                                                                                                                                                                                                                                                                                                                                                                                                                                                                                                                                                                                                                                                                                                                                                                                                                                                                                                                                                                                                                                                                                | 760-760.6, 760.8-761, 761.2-761.6, 764-764.9, 766-766.9, 770, 771, 772-772.0, 775-775.0, 775.4-776.5, 776.7-777.4, 777.7-779, 779.3, 779.6-779.8                                                                                                                                                                                                                                                                                                                                                                                                                                                                                                                                                                                                                                                                                                                                                                                                                                                                                                                                                                                                                                                                                                                                                                                                                                                                                                                                                                                                                                                                                                                                                                                                                                                                                                                                                                                                       |
| Nutritional deficiencies                                 | D50.1-D50.8, D51-D52.0, D52.8-D53.9, E00-E02, E40-E46.9, E51-E61.9, E63-E64.0, E64.2-E64.9, M12.1                                                                                                                                                                                                                                                                                                                                                                                                                                                                                                                                                                                                                                                                                                                                                                                                                                                                                                                                                                                                                                                                                                                                                                                                                                                                                                                                                                                                                                                                                                                                                                                                                                                                                                                                                                                                                                                                                                                                                                                                                                                                                                                                                                                                                                                                                                                                                                | 244.2, 260-263.9, 265-269.9, 281.0-281.9, 716.0                                                                                                                                                                                                                                                                                                                                                                                                                                                                                                                                                                                                                                                                                                                                                                                                                                                                                                                                                                                                                                                                                                                                                                                                                                                                                                                                                                                                                                                                                                                                                                                                                                                                                                                                                                                                                                                                                                        |
| Protein-energy malnutrition                              | E40-E46.9, E64.0                                                                                                                                                                                                                                                                                                                                                                                                                                                                                                                                                                                                                                                                                                                                                                                                                                                                                                                                                                                                                                                                                                                                                                                                                                                                                                                                                                                                                                                                                                                                                                                                                                                                                                                                                                                                                                                                                                                                                                                                                                                                                                                                                                                                                                                                                                                                                                                                                                                 | 260-263.9                                                                                                                                                                                                                                                                                                                                                                                                                                                                                                                                                                                                                                                                                                                                                                                                                                                                                                                                                                                                                                                                                                                                                                                                                                                                                                                                                                                                                                                                                                                                                                                                                                                                                                                                                                                                                                                                                                                                              |
| Iodine deficiency                                        |                                                                                                                                                                                                                                                                                                                                                                                                                                                                                                                                                                                                                                                                                                                                                                                                                                                                                                                                                                                                                                                                                                                                                                                                                                                                                                                                                                                                                                                                                                                                                                                                                                                                                                                                                                                                                                                                                                                                                                                                                                                                                                                                                                                                                                                                                                                                                                                                                                                                  |                                                                                                                                                                                                                                                                                                                                                                                                                                                                                                                                                                                                                                                                                                                                                                                                                                                                                                                                                                                                                                                                                                                                                                                                                                                                                                                                                                                                                                                                                                                                                                                                                                                                                                                                                                                                                                                                                                                                                        |
| Iron-deficiency anemia                                   | D50.1-D50.8                                                                                                                                                                                                                                                                                                                                                                                                                                                                                                                                                                                                                                                                                                                                                                                                                                                                                                                                                                                                                                                                                                                                                                                                                                                                                                                                                                                                                                                                                                                                                                                                                                                                                                                                                                                                                                                                                                                                                                                                                                                                                                                                                                                                                                                                                                                                                                                                                                                      |                                                                                                                                                                                                                                                                                                                                                                                                                                                                                                                                                                                                                                                                                                                                                                                                                                                                                                                                                                                                                                                                                                                                                                                                                                                                                                                                                                                                                                                                                                                                                                                                                                                                                                                                                                                                                                                                                                                                                        |
| Other nutritional deficiencies                           | D51-D52.0, D52.8-D53.9, E00-E02, E51-E61.9, E63-E64, E64.2-E64.9, M12.1                                                                                                                                                                                                                                                                                                                                                                                                                                                                                                                                                                                                                                                                                                                                                                                                                                                                                                                                                                                                                                                                                                                                                                                                                                                                                                                                                                                                                                                                                                                                                                                                                                                                                                                                                                                                                                                                                                                                                                                                                                                                                                                                                                                                                                                                                                                                                                                          | 244.2, 265-269.9, 281.0-281.9, 716.0                                                                                                                                                                                                                                                                                                                                                                                                                                                                                                                                                                                                                                                                                                                                                                                                                                                                                                                                                                                                                                                                                                                                                                                                                                                                                                                                                                                                                                                                                                                                                                                                                                                                                                                                                                                                                                                                                                                   |
| Non-communicable diseases                                | A46-A46.0, A66-A67.9, B18-B18.9, B33.2, B86, C00-C13.9, C15-C25.9, C30-C34.9, C37-C38.8, C40-C41.9, C43-C45.9, C47-C54.9, C56-C57.8, C58-C58.0, C60-C63.8, C64-C67.9, C68.0-C68.8, C69-C75.8, C81-C86.6, C88-C96.9, D00.1-D00.2, D01.0-D01.3, D02.0-D02.3, D03-D06.9, D07.0-D07.2, D07.4-D07.5, D09.0, D09.2-D09.3, D09.8, D10.0-D10.7, D11-D12.9, D13.0-D13.7, D14.0-D14.3, D15-D16.9, D22-D27.9, D28.0-D28.7, D29.0-D29.8, D30.0-D30.8, D31-D36, D36.1-D36.7, D37.1-D37.5, D38.0-D38.5, D39.1-D39.2, D39.8, D40.0-D40.8, D41.0-D41.8, D42-D43.9, D44.0-D44.8, D45-D47.9, D48.0-D48.6, D49.2-D49.4, D49.6, D52.1, D55-D58.9, D59.0-D59.3, D59.5-D59.6, D60-D61.9, D63.1, D64.0, D66-D67, D68.0-D69.8, D70-D75.8, D76-D78.8, D86-D86.9, D89-D89.3, E03-E07.1, E09-E11.9, E15.0, E16.0-E16.9, E20-E34.8, E36-E36.8, E65-E68, E70-E85.2, E88-E89.9, F00-F03.9, F10-F16.9, F18-F19.9, F24, F50.0-F50.5, G10-G13.8, G20-G20.9, G23-G26.0, G30-G31.9, G35-G37.9, G40-G41.9, G45-G46.8, G47.3, G61-G61.9, G70-G73.7, G90-G90.9, G93.7, G95-G95.9, G97-G97.9, H05.0-H05.1, I01-I01.9, I02.0, I05-I09.9, I11-I13.9, I20-I25.9, I27.1, I28-I28.8, I30-I31.1, I31.8-I37.8, I38-I41.9, I42.1-I42.8, I43-I43.9, I47-I48.9, I51.0-I51.4, I60-I63.9, I65-I66.9, I67.0-I67.3, I67.5-I67.7, I68.0-I68.2, I69.0-I69.3, I70.2-I70.8, I71-I73.9, I77-I89.9, I95.2-I95.3, I97-I98, I98.2, I98.9, I30-I35.9, I37-I39.9, J41-J46.9, J60-J63.8, J65-J68.9, J70-J70.9, J82, J84-J84.9, J91-J92.9, J95-J95.9, K20-K29.9, K31-K31.8, K35-K38.9, K40-K46.9, K50-K52.9, K55-K62.9, K63.5, K64-K64.9, K66.8, K67, K68-K68.9, K70-K70.3, K71.7, K74-K74.9, K75.1-K75.2, K75.4-K76.2, K76.4-K77, K77.8, K80-K83.9, K85-K86.9, K90-K91.9, K92.8, K93.8-K95.8, L00-L05.9, L08-L08.9, L10-L14.0, L51-L51.9, L88-L89.9, L93-L93.2, L97-L98.4, M00-M03.0, M03.2-M03.6, M05-M09.8, M30-M36.8, M40-M43.1, M65-M65.0, M71.0-M71.1, M72.5-M72.6, M80-M82.8, M86.3-M86.4, M87-M87.1, M88-M89.0, M89.5, M89.7-M89.9, N00-N08.8, N10-N12.9, N14-N16.8, N18-N18.9, N20-N23.0, N25-N28.1, N29-N32.0, N32.3-N32.4, N34-N34.3, N36-N36.9, N39-N39.2, N41-N41.9, N44-N44.0, N45-N45.9, N49-N49.9, N60-N60.9, N65-N65.1, N72-N72.0, N75-N77.8, N80-N81.9, N83-N83.9, N84.0-N84.1, N87-N87.9, N99-N99.9, P04.3-P04.4, P70.2, P96.0-P96.2, P96.5, Q00-Q07.9, Q10.4-Q18.9, Q20-Q28.9, Q30-Q36, Q37-Q45.9, Q50-Q87.8, Q89-Q89.8, Q90-Q93.9, Q95-Q99.8, R50.2, R78.0-R78.5, R95-R95.9, X45-X45.9, X65-X65.9, Y15-Y15.9 | 035-035.9, 036.4, 102-103.9, 133-133.6, 135-135.9, 136.6, 140-148.9, 150-158.9, 160-164.9, 170-175.9, 180-183.8, 184.0-184.4, 184.8, 185-186.9, 187.1-187.8, 188-188.9, 189.0-189.8, 190-194.8, 200-208.9, 209.0-209.1, 209.4-209.5, 210.0-210.9, 211.0-211.8, 212.0-212.8, 213-213.9, 217-220.9, 221.0-221.8, 222.0-222.8, 223.0-223.8, 224-228.9, 229.0, 229.8, 230.1-230.8, 231.0-231.2, 232-232.9, 233.0-233.2, 233.4-233.5, 233.7, 234.0-234.8, 235.0, 235.4, 235.6-235.8, 236.0-236.2, 236.4-236.5, 236.7, 237-237.3, 237.5-237.9, 238.0-238.9, 239.2-239.4, 239.6, 240-243.9, 244.0-244.1, 244.3-244.8, 245-246.9, 251-259.9, 270-273.9, 275-276, 277-277.2, 277.4-277.9, 278.0-278.8, 282-284.9, 286-286.5, 286.7-289.7, 290-292.9, 294.1-294.9, 303-303.9, 304.0-304.8, 305-305.9, 307.1, 327.2-327.8, 330-331.2, 331.5-332.0, 333-337.9, 340-341.9, 345-345.9, 349, 349.2-349.8, 353.6-353.9, 356-356.9, 357.0-357.1, 357.3-357.7, 358-359.9, 376.0-376.1, 391-391.9, 392.0, 393-398.9, 402-404.9, 410-414.9, 416.1, 417-417.9, 420-423, 423.1-423.9, 424.0-424.9, 425.0-425.3, 425.5, 425.7-425.8, 427-427.3, 427.6-427.8, 429.0, 430-435.9, 437.0-437.2, 437.4-437.8, 440.2, 440.4, 441-443.9, 446-457, 457.1-457.9, 459, 459.1-459.3, 470, 470.9-474.9, 476-476.1, 477-479, 491-493.9, 495-504.9, 506-506.9, 508-509, 515, 516-517.8, 518.6-518.7, 518.9, 519.0-519.4, 530-536.1, 536.4, 537-537.6, 537.8, 538-543.9, 550-553.6, 555-558.9, 560-560.3, 560.8-560.9, 562-562.1, 564-564.7, 565-566.9, 569.0-569.7, 571-571.9, 572.2-573.0, 573.4-577.9, 579-583.9, 585-585.9, 588-590.9, 592-593.8, 594-599.6, 599.8, 601-602.9, 604-604.9, 608.2, 610-610.9, 617-618.9, 620-620.9, 621.4-621.9, 622.1-622.7, 629-629.8, 680-689, 694-695.5, 707-707.9, 710-711.9, 714-714.3, 714.8-714.9, 730.1, 732-732.9, 733.0-733.1, 740-749.0, 749.2-758.9, 759.0-759.8, 760.7, 775.1-775.3, 779.4-779.5, 787.1, 788.0, 790.3, 798-798.0, E850, E860 |
| Neoplasms                                                | C00-C13.9, C15-C25.9, C30-C34.9, C37-C38.8, C40-C41.9, C43-C45.9, C47-C54.9, C56-C57.8, C58-C58.0, C60-C63.8, C64-C67.9, C68.0-C68.8, C69-C75.8, C81-C86.6, C88-C96.9, D00.1-D00.2, D01.0-D01.3, D02.0-D02.3, D03-D06.9, D07.0-D07.2, D07.4-D07.5, D09.0, D09.2-D09.3, D09.8, D10.0-D10.7, D11-D12.9, D13.0-D13.7, D14.0-D14.3, D15-D16.9, D22-D24.9, D26.0-D27.9, D28.0-D28.1, D28.7, D29.0-D29.8, D30.0-D30.8, D31-D36, D36.1-D36.7, D37.1-D37.5, D38.0-D38.5, D39.1-D39.2, D39.8, D40.0-D40.8, D41.0-D41.8, D42-D43.9, D44.0-D44.8, D45-D47.9, D48.0-D48.6, D49.2-D49.4, D49.6, K62.0-K62.1, K63.5, N60-N60.9, N84.0-N84.1, N87-N87.9                                                                                                                                                                                                                                                                                                                                                                                                                                                                                                                                                                                                                                                                                                                                                                                                                                                                                                                                                                                                                                                                                                                                                                                                                                                                                                                                                                                                                                                                                                                                                                                                                                                                                                                                                                                                                         | 140-148.9, 150-158.9, 160-164.9, 170-175.9, 180-183.8, 184.0-184.4, 184.8, 185-186.9, 187.1-187.8, 188-188.9, 189.0-189.8, 190-194.8, 200-208.9, 209.0-209.1, 209.4-209.5, 210.0-210.9, 211.0-211.8, 212.0-212.8, 213-213.9, 217-217.8, 217-217.8, 219.0, 220-220.9, 221.0-221.8, 222.0-222.8, 223.0-223.8, 224-228.9, 229.0, 229.8, 230.1-230.8, 231.0-231.2, 232-232.9, 233.0-233.2, 233.4-233.5, 233.7, 234.0-234.8, 235.0, 235.4, 235.6-235.8, 236.1-236.2, 236.4-236.5, 236.7, 237-237.3, 237.5-237.9, 238.0-238.9, 239.2-239.4, 239.6, 569.0, 610-610.9, 622.1-622.2, 622.7                                                                                                                                                                                                                                                                                                                                                                                                                                                                                                                                                                                                                                                                                                                                                                                                                                                                                                                                                                                                                                                                                                                                                                                                                                                                                                                                                                      |
| Lip and oral cavity cancer                               | C00-C08.9, D10.0-D10.5, D11-D11.9                                                                                                                                                                                                                                                                                                                                                                                                                                                                                                                                                                                                                                                                                                                                                                                                                                                                                                                                                                                                                                                                                                                                                                                                                                                                                                                                                                                                                                                                                                                                                                                                                                                                                                                                                                                                                                                                                                                                                                                                                                                                                                                                                                                                                                                                                                                                                                                                                                | 140-145.9, 210.0-210.6, 235.0                                                                                                                                                                                                                                                                                                                                                                                                                                                                                                                                                                                                                                                                                                                                                                                                                                                                                                                                                                                                                                                                                                                                                                                                                                                                                                                                                                                                                                                                                                                                                                                                                                                                                                                                                                                                                                                                                                                          |
| Nasopharynx cancer                                       | C11-C11.9, D10.6                                                                                                                                                                                                                                                                                                                                                                                                                                                                                                                                                                                                                                                                                                                                                                                                                                                                                                                                                                                                                                                                                                                                                                                                                                                                                                                                                                                                                                                                                                                                                                                                                                                                                                                                                                                                                                                                                                                                                                                                                                                                                                                                                                                                                                                                                                                                                                                                                                                 | 147-147.9, 210.7-210.9                                                                                                                                                                                                                                                                                                                                                                                                                                                                                                                                                                                                                                                                                                                                                                                                                                                                                                                                                                                                                                                                                                                                                                                                                                                                                                                                                                                                                                                                                                                                                                                                                                                                                                                                                                                                                                                                                                                                 |
| Other pharynx cancer                                     | C09-C10.9, C12-C13.9, D10.7                                                                                                                                                                                                                                                                                                                                                                                                                                                                                                                                                                                                                                                                                                                                                                                                                                                                                                                                                                                                                                                                                                                                                                                                                                                                                                                                                                                                                                                                                                                                                                                                                                                                                                                                                                                                                                                                                                                                                                                                                                                                                                                                                                                                                                                                                                                                                                                                                                      | 146-146.9, 148-148.9                                                                                                                                                                                                                                                                                                                                                                                                                                                                                                                                                                                                                                                                                                                                                                                                                                                                                                                                                                                                                                                                                                                                                                                                                                                                                                                                                                                                                                                                                                                                                                                                                                                                                                                                                                                                                                                                                                                                   |
| Esophageal cancer                                        | C15-C15.9, D00.1, D13.0                                                                                                                                                                                                                                                                                                                                                                                                                                                                                                                                                                                                                                                                                                                                                                                                                                                                                                                                                                                                                                                                                                                                                                                                                                                                                                                                                                                                                                                                                                                                                                                                                                                                                                                                                                                                                                                                                                                                                                                                                                                                                                                                                                                                                                                                                                                                                                                                                                          | 150-150.9, 211.0, 230.1                                                                                                                                                                                                                                                                                                                                                                                                                                                                                                                                                                                                                                                                                                                                                                                                                                                                                                                                                                                                                                                                                                                                                                                                                                                                                                                                                                                                                                                                                                                                                                                                                                                                                                                                                                                                                                                                                                                                |
| Stomach cancer                                           | C16-C16.9, D00.2, D13.1, D37.1                                                                                                                                                                                                                                                                                                                                                                                                                                                                                                                                                                                                                                                                                                                                                                                                                                                                                                                                                                                                                                                                                                                                                                                                                                                                                                                                                                                                                                                                                                                                                                                                                                                                                                                                                                                                                                                                                                                                                                                                                                                                                                                                                                                                                                                                                                                                                                                                                                   | 151-151.9, 211.1, 230.2                                                                                                                                                                                                                                                                                                                                                                                                                                                                                                                                                                                                                                                                                                                                                                                                                                                                                                                                                                                                                                                                                                                                                                                                                                                                                                                                                                                                                                                                                                                                                                                                                                                                                                                                                                                                                                                                                                                                |
| Colon and rectum cancer                                  | C18-C21.9, D01.0-D01.3, D12-D12.9, D37.3-D37.5                                                                                                                                                                                                                                                                                                                                                                                                                                                                                                                                                                                                                                                                                                                                                                                                                                                                                                                                                                                                                                                                                                                                                                                                                                                                                                                                                                                                                                                                                                                                                                                                                                                                                                                                                                                                                                                                                                                                                                                                                                                                                                                                                                                                                                                                                                                                                                                                                   | 153-154.9, 209.1, 209.5, 211.3-211.4, 230.3-230.6, 569.0                                                                                                                                                                                                                                                                                                                                                                                                                                                                                                                                                                                                                                                                                                                                                                                                                                                                                                                                                                                                                                                                                                                                                                                                                                                                                                                                                                                                                                                                                                                                                                                                                                                                                                                                                                                                                                                                                               |



| Cause                                                                  | ICD10                                                                                                                                                                                                                                                                                                                                                                       | ICD9                                                                                                                                                                                                                                                                                                                                                                             |
|------------------------------------------------------------------------|-----------------------------------------------------------------------------------------------------------------------------------------------------------------------------------------------------------------------------------------------------------------------------------------------------------------------------------------------------------------------------|----------------------------------------------------------------------------------------------------------------------------------------------------------------------------------------------------------------------------------------------------------------------------------------------------------------------------------------------------------------------------------|
| Liver cancer                                                           | C22-C22.9, D13.4                                                                                                                                                                                                                                                                                                                                                            | 155-155.9, 211.5                                                                                                                                                                                                                                                                                                                                                                 |
| Liver cancer due to hepatitis B                                        |                                                                                                                                                                                                                                                                                                                                                                             |                                                                                                                                                                                                                                                                                                                                                                                  |
| Liver cancer due to hepatitis C                                        |                                                                                                                                                                                                                                                                                                                                                                             |                                                                                                                                                                                                                                                                                                                                                                                  |
| Liver cancer due to alcohol use                                        |                                                                                                                                                                                                                                                                                                                                                                             |                                                                                                                                                                                                                                                                                                                                                                                  |
| Liver cancer due to NASH                                               |                                                                                                                                                                                                                                                                                                                                                                             |                                                                                                                                                                                                                                                                                                                                                                                  |
| Liver cancer due to other causes                                       |                                                                                                                                                                                                                                                                                                                                                                             |                                                                                                                                                                                                                                                                                                                                                                                  |
| Gallbladder and biliary tract cancer                                   | C23-C24.9, D13.5                                                                                                                                                                                                                                                                                                                                                            | 156-156.9                                                                                                                                                                                                                                                                                                                                                                        |
| Pancreatic cancer                                                      | C25-C25.9, D13.6-D13.7                                                                                                                                                                                                                                                                                                                                                      | 157-157.9, 211.6-211.7                                                                                                                                                                                                                                                                                                                                                           |
| Larynx cancer                                                          | C32-C32.9, D02.0, D14.1, D38.0                                                                                                                                                                                                                                                                                                                                              | 161-161.9, 212.1, 231.0, 235.6                                                                                                                                                                                                                                                                                                                                                   |
| Tracheal, bronchus, and lung cancer                                    | C33-C34.9, D02.1-D02.3, D14.2-D14.3, D38.1                                                                                                                                                                                                                                                                                                                                  | 162-162.9, 212.2-212.3, 231.1-231.2, 235.7                                                                                                                                                                                                                                                                                                                                       |
| Malignant skin melanoma                                                | C43-C43.9, D03-D03.9, D22-D23.9, D48.5                                                                                                                                                                                                                                                                                                                                      | 172-172.9                                                                                                                                                                                                                                                                                                                                                                        |
| Non-melanoma skin cancer                                               | C44-C44.9, D04-D04.9, D49.2                                                                                                                                                                                                                                                                                                                                                 | 173-173.9, 222.4, 232-232.9, 238.2                                                                                                                                                                                                                                                                                                                                               |
| Non-melanoma skin cancer (squamous-cell carcinoma)                     | C44-C44.9, D04-D04.9, D49.2                                                                                                                                                                                                                                                                                                                                                 | 173-173.9, 222.4, 232-232.9, 238.2                                                                                                                                                                                                                                                                                                                                               |
| Breast cancer                                                          | C50-C50.9, D05-D05.9, D24-D24.9, D48.6, D49.3                                                                                                                                                                                                                                                                                                                               | 174-175.9, 217-217.8, 233.0, 238.3, 239.3, 610-610.9                                                                                                                                                                                                                                                                                                                             |
| Cervical cancer                                                        | C53-C53.9, D06-D06.9, D26.0                                                                                                                                                                                                                                                                                                                                                 | 180-180.9, 219.0, 233.1, 622.1-622.2, 622.7                                                                                                                                                                                                                                                                                                                                      |
| Uterine cancer                                                         | C54-C54.9, D07.0-D07.2, D26.1-D26.9                                                                                                                                                                                                                                                                                                                                         | 182-182.9, 233.2                                                                                                                                                                                                                                                                                                                                                                 |
| Ovarian cancer                                                         | C56-C56.9, D27-D27.9, D39.1                                                                                                                                                                                                                                                                                                                                                 | 183-183.0, 220-220.9, 236.2                                                                                                                                                                                                                                                                                                                                                      |
| Prostate cancer                                                        | C61-C61.9, D07.5, D29.1, D40.0                                                                                                                                                                                                                                                                                                                                              | 185-185.9, 222.2, 236.5                                                                                                                                                                                                                                                                                                                                                          |
| Testicular cancer                                                      | C62-C62.9, D29.2-D29.8, D40.1-D40.8                                                                                                                                                                                                                                                                                                                                         | 186-186.9, 222.0, 222.3, 236.4                                                                                                                                                                                                                                                                                                                                                   |
| Kidney cancer                                                          | C64-C65.9, D30.0-D30.1, D41.0-D41.1                                                                                                                                                                                                                                                                                                                                         | 189.0-189.1, 189.5-189.6, 223.0-223.1                                                                                                                                                                                                                                                                                                                                            |
| Bladder cancer                                                         | C67-C67.9, D09.0, D30.3, D41.4-D41.8, D49.4                                                                                                                                                                                                                                                                                                                                 | 188-188.9, 223.3, 233.7, 236.7, 239.4                                                                                                                                                                                                                                                                                                                                            |
| Brain and nervous system cancer                                        | C70-C72.9                                                                                                                                                                                                                                                                                                                                                                   | 191-192.9                                                                                                                                                                                                                                                                                                                                                                        |
| Thyroid cancer                                                         | C73-C73.9, D09.3, D09.8, D34-D34.9, D44.0                                                                                                                                                                                                                                                                                                                                   | 193-193.9, 226-226.9                                                                                                                                                                                                                                                                                                                                                             |
| Mesothelioma                                                           | C45-C45.9                                                                                                                                                                                                                                                                                                                                                                   |                                                                                                                                                                                                                                                                                                                                                                                  |
| Hodgkin lymphoma                                                       | C81-C81.9                                                                                                                                                                                                                                                                                                                                                                   | 201-201.9                                                                                                                                                                                                                                                                                                                                                                        |
| Non-Hodgkin lymphoma                                                   | C82-C86.6, C96-C96.9                                                                                                                                                                                                                                                                                                                                                        | 200-200.9, 202-202.9                                                                                                                                                                                                                                                                                                                                                             |
| Multiple myeloma                                                       | C88-C90.9                                                                                                                                                                                                                                                                                                                                                                   | 203-203.9                                                                                                                                                                                                                                                                                                                                                                        |
| Leukemia                                                               | C91-C95.9                                                                                                                                                                                                                                                                                                                                                                   | 204-208.9                                                                                                                                                                                                                                                                                                                                                                        |
| Acute lymphoid leukemia                                                | C91.0                                                                                                                                                                                                                                                                                                                                                                       | 204.0                                                                                                                                                                                                                                                                                                                                                                            |
| Chronic lymphoid leukemia                                              | C91.1                                                                                                                                                                                                                                                                                                                                                                       | 204.1                                                                                                                                                                                                                                                                                                                                                                            |
| Acute myeloid leukemia                                                 | C92.0, C92.3-C92.6, C93.0, C94.0, C94.2, C94.4-C94.5                                                                                                                                                                                                                                                                                                                        | 205.0, 205.3, 206.0, 207.0                                                                                                                                                                                                                                                                                                                                                       |
| Chronic myeloid leukemia                                               | C92.1                                                                                                                                                                                                                                                                                                                                                                       | 205.1, 206.1, 207.1                                                                                                                                                                                                                                                                                                                                                              |
| Other leukemia                                                         | C91.2-C91.9, C92.2, C92.7-C92.9, C93.1-C93.9, C94.1, C94.3, C94.6-C95.9                                                                                                                                                                                                                                                                                                     | 204.2-204.9, 205.2, 205.8-205.9, 206.2-207, 207.2-208.9                                                                                                                                                                                                                                                                                                                          |
| Other malignant cancers                                                | C17-C17.9, C30-C31.9, C37-C38.8, C40-C41.9, C47-C4A, C51-C52.9, C57-C57.8, C58-C58.0, C60-C60.9, C63-C63.8, C66-C66.9, C68.0-C68.8, C69-C69.9, C74-C75.8, D07.4, D09.2, D13.2-D13.3, D14.0, D15-D16.9, D28.0-D28.1, D28.7, D29.0, D30.2, D30.4-D30.8, D31-D31.9, D35-D35.2, D35.5-D36, D36.1-D36.7, D37.2, D38.2-D38.5, D39.2, D39.8, D41.2-D41.3, D44.1-D44.8, D48.0-D48.4 | 152-152.9, 158-158.9, 160-160.9, 163-164.9, 170-171.9, 181-181.9, 183.2-183.8, 184.0-184.4, 184.8, 187.1-187.8, 189.2-189.4, 189.8, 190-190.9, 194-194.8, 209.0, 209.4, 211.2, 211.8, 212.0, 212.4-212.8, 213-213.9, 221.0-221.8, 222.1, 222.8, 223.2, 223.8, 224-224.9, 227-228.9, 229.0, 229.8, 230.7-230.8, 233.4-233.5, 234.0-234.8, 235.4, 235.8, 236.1, 238.0-238.1, 239.2 |
| Other neoplasms                                                        | D32-D33.9, D35.3-D35.4, D42-D43.9, D45-D47.9, D49.6, K62.0-K62.1, K63.5, N60-N60.9, N84.0-N84.1, N87-N87.9                                                                                                                                                                                                                                                                  | 225-225.9, 237-237.3, 237.5-237.9, 238.4-238.9, 239.6                                                                                                                                                                                                                                                                                                                            |
| Myelodysplastic, myeloproliferative, and other hematopoietic neoplasms | D45-D47.9                                                                                                                                                                                                                                                                                                                                                                   | 238.4-238.9                                                                                                                                                                                                                                                                                                                                                                      |
| Benign and in situ intestinal neoplasms                                | K62.0-K62.1, K63.5                                                                                                                                                                                                                                                                                                                                                          |                                                                                                                                                                                                                                                                                                                                                                                  |
| Benign and in situ cervical and uterine neoplasms                      | N84.0-N84.1, N87-N87.9                                                                                                                                                                                                                                                                                                                                                      |                                                                                                                                                                                                                                                                                                                                                                                  |
| Other benign and in situ neoplasms                                     | N60-N60.9                                                                                                                                                                                                                                                                                                                                                                   |                                                                                                                                                                                                                                                                                                                                                                                  |
| Cardiovascular diseases                                                | B33.2, G45-G46.8, I01-I01.9, I02.0, I05-I09.9, I11-I11.9, I20-I25.9, I28-I28.8, I30-I31.1, I31.8-I37.8, I38-I41.9, I42.1-I42.8, I43-I43.9, I47-I48.9, I51.0-I51.4, I60-I63.9, I65-I66.9, I67.0-I67.3, I67.5-I67.6, I68.0-I68.2, I69.0-I69.3, I70.2-I70.8, I71-I73.9, I77-I83.9, I86-I89.0, I89.9, I98, K75.1                                                                | 036.4, 391-391.9, 392.0, 393-398.9, 402-402.9, 410-414.9, 417-417.9, 420-423, 423.1-423.9, 424.0-424.9, 425.0-425.3, 425.5, 425.7-425.8, 427-427.3, 427.6-427.8, 429.0, 430-435.9, 437.0-437.2, 437.5-437.8, 440.2, 440.4, 441-443.9, 447-454.9, 456, 456.3-457, 457.1, 457.8-457.9, 459, 459.1-459.3                                                                            |
| Rheumatic heart disease                                                | I01-I01.9, I02.0, I05-I09.9                                                                                                                                                                                                                                                                                                                                                 | 391-391.9, 392.0, 393-398.9                                                                                                                                                                                                                                                                                                                                                      |
| Ischemic heart disease                                                 | I20-I25.9                                                                                                                                                                                                                                                                                                                                                                   | 410-414.9                                                                                                                                                                                                                                                                                                                                                                        |
| Stroke                                                                 | G45-G46.8, I60-I63.9, I65-I66.9, I67.0-I67.3, I67.5-I67.6, I68.1-I68.2, I69.0-I69.3                                                                                                                                                                                                                                                                                         | 430-435.9, 437.0-437.2, 437.5-437.8                                                                                                                                                                                                                                                                                                                                              |
| Ischemic stroke                                                        | G45-G46.8, I63-I63.9, I65-I66.9, I67.2-I67.3, I67.5-I67.6, I69.3                                                                                                                                                                                                                                                                                                            | 433-435.9, 437.0-437.1, 437.5-437.8                                                                                                                                                                                                                                                                                                                                              |
| Intracerebral hemorrhage                                               | I61-I62, I62.1-I62.9, I68.1-I68.2, I69.1-I69.2                                                                                                                                                                                                                                                                                                                              | 431-432.9, 437.2                                                                                                                                                                                                                                                                                                                                                                 |
| Subarachnoid hemorrhage                                                | I60-I60.9, I62.0, I67.0-I67.1, I69.0                                                                                                                                                                                                                                                                                                                                        | 430-430.9                                                                                                                                                                                                                                                                                                                                                                        |
| Hypertensive heart disease                                             | I11-I11.9                                                                                                                                                                                                                                                                                                                                                                   | 402-402.9                                                                                                                                                                                                                                                                                                                                                                        |
| Non-rheumatic valvular heart disease                                   | I34-I37.8                                                                                                                                                                                                                                                                                                                                                                   | 424.0-424.3, 424.8                                                                                                                                                                                                                                                                                                                                                               |
| Non-rheumatic calcific aortic valve disease                            | I35-I35.9                                                                                                                                                                                                                                                                                                                                                                   | 424.1                                                                                                                                                                                                                                                                                                                                                                            |
| Non-rheumatic degenerative mitral valve disease                        | I34-I34.9                                                                                                                                                                                                                                                                                                                                                                   | 424.0                                                                                                                                                                                                                                                                                                                                                                            |
| Other non-rheumatic valve diseases                                     | I36-I37.8                                                                                                                                                                                                                                                                                                                                                                   | 424.2-424.3, 424.8                                                                                                                                                                                                                                                                                                                                                               |
| Cardiomyopathy and myocarditis                                         | B33.2, I40-I41.9, I42.1-I42.8, I43-I43.9, I51.4                                                                                                                                                                                                                                                                                                                             | 422-422.9, 425.0-425.3, 425.5, 425.7-425.8, 429.0                                                                                                                                                                                                                                                                                                                                |
| Myocarditis                                                            | B33.2, I40-I41.9, I51.4                                                                                                                                                                                                                                                                                                                                                     | 422-422.9                                                                                                                                                                                                                                                                                                                                                                        |
| Alcoholic cardiomyopathy                                               | I42.6                                                                                                                                                                                                                                                                                                                                                                       | 425.5                                                                                                                                                                                                                                                                                                                                                                            |

| Cause                                                                       | ICD10                                                                                                                                                                                                                                                                                       | ICD9                                                                                                                                                                                                                                                                              |
|-----------------------------------------------------------------------------|---------------------------------------------------------------------------------------------------------------------------------------------------------------------------------------------------------------------------------------------------------------------------------------------|-----------------------------------------------------------------------------------------------------------------------------------------------------------------------------------------------------------------------------------------------------------------------------------|
| Other cardiomyopathy                                                        | I42.1-I42.5, I42.7-I42.8, I43-I43.9                                                                                                                                                                                                                                                         | 425.0-425.3, 425.7-425.8, 429.0                                                                                                                                                                                                                                                   |
| Atrial fibrillation and flutter                                             | I48-I48.9                                                                                                                                                                                                                                                                                   | 427.3                                                                                                                                                                                                                                                                             |
| Aortic aneurysm                                                             | I71-I71.9                                                                                                                                                                                                                                                                                   | 441-441.9                                                                                                                                                                                                                                                                         |
| Peripheral artery disease                                                   | I70.2-I70.8, I73-I73.9                                                                                                                                                                                                                                                                      | 440.2, 440.4, 443.0-443.9                                                                                                                                                                                                                                                         |
| Endocarditis                                                                | I33-I33.9, I38-I39.9                                                                                                                                                                                                                                                                        | 421-421.9, 424.4-424.5, 424.9                                                                                                                                                                                                                                                     |
| Other cardiovascular and circulatory diseases                               | I28-I28.8, I30-I31.1, I31.8-I32.8, I47-I47.9, I51.0-I51.3, I68.0, I72-I72.9, I77-I83.9, I86-I89.0, I89.9, I98, K75.1                                                                                                                                                                        | 036.4, 417-417.9, 420-420.9, 423, 423.1-423.9, 427-427.2, 427.6-427.8, 442-443, 447-454.9, 456, 456.3-457, 457.1, 457.8-457.9, 459, 459.1-459.3                                                                                                                                   |
| Chronic respiratory diseases                                                | D86-D86.2, D86.9, G47.3, J30-J35.9, J37-J39.9, J41-J46.9, J60-J63.8, J65-J68.9, J70, J70.8-J70.9, J82, J84-J84.9, J91-J92.9                                                                                                                                                                 | 135-135.9, 136.6, 327.2-327.8, 470, 470.9-474.9, 476-476.1, 477-479, 491-493.9, 495-504.9, 506-506.9, 508-509, 515, 516-517.8, 518.6, 518.9, 519.1-519.4                                                                                                                          |
| Chronic obstructive pulmonary disease                                       | J41-J44.9                                                                                                                                                                                                                                                                                   | 491-492.9, 496-499                                                                                                                                                                                                                                                                |
| Pneumoconiosis                                                              | J60-J63.8, J65-J65.0, J92.0                                                                                                                                                                                                                                                                 | 500-504.9                                                                                                                                                                                                                                                                         |
| Silicosis                                                                   | J62-J62.9                                                                                                                                                                                                                                                                                   | 502-502.9, 503.0, 503.9                                                                                                                                                                                                                                                           |
| Asbestosis                                                                  | J61-J61.0, J92.0                                                                                                                                                                                                                                                                            | 501                                                                                                                                                                                                                                                                               |
| Coal workers pneumoconiosis                                                 | J60-J60.0                                                                                                                                                                                                                                                                                   | 500-500.9, 501.0-501.9                                                                                                                                                                                                                                                            |
| Other pneumoconiosis                                                        | J63-J63.8, J65-J65.0                                                                                                                                                                                                                                                                        | 503, 503.1, 504-504.9                                                                                                                                                                                                                                                             |
| Asthma                                                                      | J45-J46.9                                                                                                                                                                                                                                                                                   | 493-493.9                                                                                                                                                                                                                                                                         |
| Interstitial lung disease and pulmonary sarcoidosis                         | D86-D86.2, D86.9, J84-J84.9                                                                                                                                                                                                                                                                 | 135-135.9, 136.6, 515, 516-516.9                                                                                                                                                                                                                                                  |
| Other chronic respiratory diseases                                          | G47.3, J30-J35.9, J37-J39.9, J66-J68.9, J70, J70.8-J70.9, J82, J91-J92, J92.9                                                                                                                                                                                                               | 327.2-327.8, 470, 470.9-474.9, 476-476.1, 477-479, 495-495.9, 506-506.9, 508-509, 517-517.8, 518.6, 518.9, 519.1-519.4                                                                                                                                                            |
| Digestive diseases                                                          | B18-B18.9, I84-I85.9, I98.2, K20-K29.9, K31-K31.8, K35-K38.9, K40-K42.9, K44-K46.9, K50-K52.9, K55-K62, K62.2-K62.6, K62.8-K62.9, K64-K64.9, K66.8, K67, K68-K68.9, K70-K70.3, K71.7, K74-K74.9, K75.2, K75.4-K76.2, K76.4-K77, K77.8, K80-K83.9, K85-K86.9, K90-K90.9, K92.8, K93.8, M09.1 | 455-455.9, 456.0-456.2, 530-536.1, 537-537.6, 537.8, 538, 540-543.9, 550-551.1, 551.3-552.1, 552.3-553.6, 555-558.9, 560-560.3, 560.8-560.9, 562-562.1, 564-564.1, 564.5-564.7, 565-566.9, 569.1-569.5, 569.7, 571-571.9, 572.2-573.0, 573.4-577.9, 579-579.2, 579.4-579.9, 787.1 |
| Cirrhosis and other chronic liver diseases                                  | B18-B18.9, I85-I85.9, I98.2, K70-K70.3, K71.7, K74-K74.9, K75.2, K75.4-K76.2, K76.4-K76.9, K77.8                                                                                                                                                                                            | 456.0-456.2, 571-571.9, 572.2-573.0, 573.4-573.9                                                                                                                                                                                                                                  |
| Cirrhosis and other chronic liver diseases due to hepatitis B               |                                                                                                                                                                                                                                                                                             |                                                                                                                                                                                                                                                                                   |
| Cirrhosis and other chronic liver diseases due to hepatitis C               |                                                                                                                                                                                                                                                                                             |                                                                                                                                                                                                                                                                                   |
| Cirrhosis and other chronic liver diseases due to alcohol use               |                                                                                                                                                                                                                                                                                             |                                                                                                                                                                                                                                                                                   |
| Non-alcoholic fatty liver disease/Non-alcoholic steatohepatitis (NFLD/NASH) |                                                                                                                                                                                                                                                                                             |                                                                                                                                                                                                                                                                                   |
| Cirrhosis and other chronic liver diseases due to other causes              |                                                                                                                                                                                                                                                                                             |                                                                                                                                                                                                                                                                                   |
| Upper digestive system diseases                                             | K21-K21.9, K22.7, K25-K29.9, K31, K31.1-K31.6, K31.8                                                                                                                                                                                                                                        | 530.1, 530.8, 531-535.9, 787.1                                                                                                                                                                                                                                                    |
| Peptic ulcer disease                                                        | K25-K28.9, K31, K31.1-K31.6, K31.8                                                                                                                                                                                                                                                          | 531-534.9                                                                                                                                                                                                                                                                         |
| Gastritis and duodenitis                                                    | K29-K29.9                                                                                                                                                                                                                                                                                   | 535-535.9                                                                                                                                                                                                                                                                         |
| Appendicitis                                                                | K35-K37.9, K38.3-K38.9                                                                                                                                                                                                                                                                      | 540-542.9                                                                                                                                                                                                                                                                         |
| Paralytic ileus and intestinal obstruction                                  | K56-K56.9                                                                                                                                                                                                                                                                                   | 560-560.3, 560.8-560.9                                                                                                                                                                                                                                                            |
| Inguinal, femoral, and abdominal hernia                                     | K40-K42.9, K44-K46.9                                                                                                                                                                                                                                                                        | 550-551.1, 551.3-552.1, 552.3-553.0, 553.6                                                                                                                                                                                                                                        |
| Inflammatory bowel disease                                                  | K50-K52.9, M09.1                                                                                                                                                                                                                                                                            | 555-556.9, 558-558.9, 569.5                                                                                                                                                                                                                                                       |
| Vascular intestinal disorders                                               | K55-K55.9                                                                                                                                                                                                                                                                                   | 557-557.9                                                                                                                                                                                                                                                                         |
| Gallbladder and biliary diseases                                            | K80-K83.9                                                                                                                                                                                                                                                                                   | 574-576.9                                                                                                                                                                                                                                                                         |
| Pancreatitis                                                                | K85-K86.9                                                                                                                                                                                                                                                                                   | 577-577.9, 579.4                                                                                                                                                                                                                                                                  |
| Other digestive diseases                                                    | I84-I84.9, K20-K20.9, K22-K22.6, K22.8-K24, K31.0, K31.7, K38-K38.2, K57-K62, K62.2-K62.6, K62.8-K62.9, K64-K64.9, K66.8, K67, K68-K68.9, K77, K90-K90.9, K92.8, K93.8                                                                                                                      | 455-455.9, 530-530.0, 530.2-530.7, 530.9, 536-536.1, 537-537.6, 537.8, 538, 543-543.9, 553.1-553.3, 562-562.1, 564-564.1, 564.5-564.7, 565-566.9, 569.1-569.4, 569.7, 579-579.2, 579.8-579.9                                                                                      |
| Neurological disorders                                                      | F00-F03.9, G10-G13.8, G20-G20.9, G23-G24, G24.1-G25.0, G25.2-G25.3, G25.5, G25.8-G26.0, G30-G31.1, G31.8-G31.9, G35-G37.9, G40-G41.9, G61-G61.9, G70-G72, G72.2-G73.7, G90-G90.9, G95-G95.9, M33-M33.9                                                                                      | 290-290.9, 294.1-294.9, 330-331.2, 331.5-332.0, 333-337.9, 340-341.9, 345-345.9, 349, 349.2-349.8, 353.6-353.9, 356-356.9, 357.0-357.1, 357.3-357.4, 357.7, 358-359.9, 775.2                                                                                                      |
| Alzheimer disease and other dementias                                       | F00-F03.9, G30-G31.1, G31.8-G31.9                                                                                                                                                                                                                                                           | 290-290.9, 294.1-294.9, 331-331.2                                                                                                                                                                                                                                                 |
| Parkinson disease                                                           | G20-G20.9                                                                                                                                                                                                                                                                                   | 332-332.0                                                                                                                                                                                                                                                                         |
| Epilepsy                                                                    | G40-G41.9                                                                                                                                                                                                                                                                                   | 345-345.9                                                                                                                                                                                                                                                                         |
| Multiple sclerosis                                                          | G35-G35.9                                                                                                                                                                                                                                                                                   | 340-340.9                                                                                                                                                                                                                                                                         |
| Motor neuron disease                                                        | G12.2-G12.9                                                                                                                                                                                                                                                                                 | 335-335.2, 335.8-335.9                                                                                                                                                                                                                                                            |
| Other neurological disorders                                                | G10-G12.1, G13-G13.8, G23-G24, G24.1-G25.0, G25.2-G25.3, G25.5, G25.8-G26.0, G36-G37.9, G61-G61.9, G70-G72, G72.2-G73.7, G90-G90.9, G95-G95.9, M33-M33.9                                                                                                                                    | 330-330.9, 331.5-331.9, 333-334.9, 335.3, 336-337.9, 341-341.9, 349, 349.2-349.8, 353.6-353.9, 356-356.9, 357.0-357.1, 357.3-357.4, 357.7, 358-359.9, 775.2                                                                                                                       |
| Mental disorders                                                            | F24, F50.0-F50.5                                                                                                                                                                                                                                                                            | 307.1                                                                                                                                                                                                                                                                             |
| Eating disorders                                                            | F50.0-F50.5                                                                                                                                                                                                                                                                                 | 307.1                                                                                                                                                                                                                                                                             |
| Anorexia nervosa                                                            | F50.0-F50.1                                                                                                                                                                                                                                                                                 | 307.1                                                                                                                                                                                                                                                                             |
| Bulimia nervosa                                                             | F50.2-F50.5                                                                                                                                                                                                                                                                                 |                                                                                                                                                                                                                                                                                   |
| Substance use disorders                                                     | F10-F16.9, F18-F19.9, G31.2, G72.1, P04.3-P04.4, P96.1, Q86.0, R78.0-R78.5, X45-X45.9, X65-X65.9, Y15-Y15.9                                                                                                                                                                                 | 291-292.9, 303-303.9, 304.0-304.8, 305-305.9, 357.5, 760.7, 790.3, E850, E860                                                                                                                                                                                                     |
| Alcohol use disorders                                                       | F10-F10.9, G31.2, G72.1, P04.3, Q86.0, R78.0, X45-X45.9, X65-X65.9, Y15-Y15.9                                                                                                                                                                                                               | 291-291.9, 303-303.9, 305.0, 357.5, 790.3, E860                                                                                                                                                                                                                                   |
| Drug use disorders                                                          | F11-F16.9, F18-F19.9, P04.4, P96.1, R78.1-R78.5                                                                                                                                                                                                                                             | 292-292.9, 304.0-304.8, 305, 305.1-305.9, 760.7, E850                                                                                                                                                                                                                             |
| Opioid use disorders                                                        | F11-F11.9, P96.1, R78.1                                                                                                                                                                                                                                                                     | 304.0, 305.5                                                                                                                                                                                                                                                                      |
| Cocaine use disorders                                                       | F14-F14.9, R78.2                                                                                                                                                                                                                                                                            | 304.2, 305.6                                                                                                                                                                                                                                                                      |
| Amphetamine use disorders                                                   | F15-F15.9                                                                                                                                                                                                                                                                                   | 304.4, 305.7                                                                                                                                                                                                                                                                      |

| Cause                                                  | ICD10                                                                                                                                                                                                                                                                                                                                                                                                                                                                                                                                                                                                                                                                                                                                                                                                    | ICD9                                                                                                                                                                                                                                                                                                                                                                                                                                                                                                  |
|--------------------------------------------------------|----------------------------------------------------------------------------------------------------------------------------------------------------------------------------------------------------------------------------------------------------------------------------------------------------------------------------------------------------------------------------------------------------------------------------------------------------------------------------------------------------------------------------------------------------------------------------------------------------------------------------------------------------------------------------------------------------------------------------------------------------------------------------------------------------------|-------------------------------------------------------------------------------------------------------------------------------------------------------------------------------------------------------------------------------------------------------------------------------------------------------------------------------------------------------------------------------------------------------------------------------------------------------------------------------------------------------|
| Other drug use disorders                               | F13-F13.9, F16-F16.9, F18-F19.9, P04.4, R78.3-R78.5                                                                                                                                                                                                                                                                                                                                                                                                                                                                                                                                                                                                                                                                                                                                                      | 292-292.9, 304.1, 304.5-304.8, 305, 305.1, 305.3-305.4, 305.8-305.9, 760.7                                                                                                                                                                                                                                                                                                                                                                                                                            |
| Diabetes and kidney diseases                           | D63.1, E10-E11.9, I12-I13.9, N00-N08.8, N15.0, N18-N18.9, P70.2, Q61-Q62.8                                                                                                                                                                                                                                                                                                                                                                                                                                                                                                                                                                                                                                                                                                                               | 403-404.9, 580-583.9, 585-585.9, 589-589.9, 753-753.3, 775.1                                                                                                                                                                                                                                                                                                                                                                                                                                          |
| Diabetes mellitus                                      | E10-E10.1, E10.3-E11.1, E11.3-E11.9, P70.2                                                                                                                                                                                                                                                                                                                                                                                                                                                                                                                                                                                                                                                                                                                                                               | 775.1                                                                                                                                                                                                                                                                                                                                                                                                                                                                                                 |
| Diabetes mellitus type 1                               | E10-E10.1, E10.3-E10.9, P70.2                                                                                                                                                                                                                                                                                                                                                                                                                                                                                                                                                                                                                                                                                                                                                                            | 775.1                                                                                                                                                                                                                                                                                                                                                                                                                                                                                                 |
| Diabetes mellitus type 2                               | E11-E11.1, E11.3-E11.9                                                                                                                                                                                                                                                                                                                                                                                                                                                                                                                                                                                                                                                                                                                                                                                   |                                                                                                                                                                                                                                                                                                                                                                                                                                                                                                       |
| Chronic kidney disease                                 | D63.1, E10.2, E11.2, I12-I13.9, N02-N08.8, N15.0, N18-N18.9, Q61-Q62.8                                                                                                                                                                                                                                                                                                                                                                                                                                                                                                                                                                                                                                                                                                                                   | 403-404.9, 581-583.9, 585-585.9, 589-589.9, 753-753.3                                                                                                                                                                                                                                                                                                                                                                                                                                                 |
| Chronic kidney disease due to diabetes mellitus type 1 | E10.2                                                                                                                                                                                                                                                                                                                                                                                                                                                                                                                                                                                                                                                                                                                                                                                                    |                                                                                                                                                                                                                                                                                                                                                                                                                                                                                                       |
| Chronic kidney disease due to diabetes mellitus type 2 | E11.2                                                                                                                                                                                                                                                                                                                                                                                                                                                                                                                                                                                                                                                                                                                                                                                                    |                                                                                                                                                                                                                                                                                                                                                                                                                                                                                                       |
| Chronic kidney disease due to hypertension             | I12-I13.9                                                                                                                                                                                                                                                                                                                                                                                                                                                                                                                                                                                                                                                                                                                                                                                                | 403-404.9                                                                                                                                                                                                                                                                                                                                                                                                                                                                                             |
| Chronic kidney disease due to glomerulonephritis       | N03-N06.9                                                                                                                                                                                                                                                                                                                                                                                                                                                                                                                                                                                                                                                                                                                                                                                                | 581-583.9                                                                                                                                                                                                                                                                                                                                                                                                                                                                                             |
| Chronic kidney disease due to other causes             | N02-N02.9, N07-N08.8, N15.0, Q61-Q62.8                                                                                                                                                                                                                                                                                                                                                                                                                                                                                                                                                                                                                                                                                                                                                                   | 589-589.9, 753-753.3                                                                                                                                                                                                                                                                                                                                                                                                                                                                                  |
| Acute glomerulonephritis                               | N00-N01.9                                                                                                                                                                                                                                                                                                                                                                                                                                                                                                                                                                                                                                                                                                                                                                                                | 580-580.9                                                                                                                                                                                                                                                                                                                                                                                                                                                                                             |
| Skin and subcutaneous diseases                         | A46-A46.0, A66-A67.9, B86, D86.3, I89.1-I89.8, L00-L05.9, L08-L08.9, L10-L14.0, L51-L51.9, L88-L89.9, L97-L98.4, M72.5-M72.6                                                                                                                                                                                                                                                                                                                                                                                                                                                                                                                                                                                                                                                                             | 035-035.9, 102-103.9, 133-133.6, 457.2-457.3, 680-689, 694-695.3, 707-707.9                                                                                                                                                                                                                                                                                                                                                                                                                           |
| Bacterial skin diseases                                | A46-A46.0, A66-A67.9, I89.1-I89.8, L00-L05.9, L08-L08.9, L88, L97-L98.4, M72.5-M72.6                                                                                                                                                                                                                                                                                                                                                                                                                                                                                                                                                                                                                                                                                                                     | 035-035.9, 102-103.9, 457.2-457.3, 680-689                                                                                                                                                                                                                                                                                                                                                                                                                                                            |
| Cellulitis                                             | L03-L03.9, M72.5-M72.6                                                                                                                                                                                                                                                                                                                                                                                                                                                                                                                                                                                                                                                                                                                                                                                   | 681-682.9                                                                                                                                                                                                                                                                                                                                                                                                                                                                                             |
| Pyoderma                                               | A46-A46.0, A66-A67.9, I89.1-I89.8, L00-L02.9, L04-L05.9, L08-L08.9, L88, L97-L98.4                                                                                                                                                                                                                                                                                                                                                                                                                                                                                                                                                                                                                                                                                                                       | 035-035.9, 102-103.9, 457.2-457.3, 680-680.9, 683-689                                                                                                                                                                                                                                                                                                                                                                                                                                                 |
| Decubitus ulcer                                        | L89-L89.9                                                                                                                                                                                                                                                                                                                                                                                                                                                                                                                                                                                                                                                                                                                                                                                                | 707-707.9                                                                                                                                                                                                                                                                                                                                                                                                                                                                                             |
| Other skin and subcutaneous diseases                   | D86.3, L10-L14.0, L51-L51.9                                                                                                                                                                                                                                                                                                                                                                                                                                                                                                                                                                                                                                                                                                                                                                              | 694-695.3                                                                                                                                                                                                                                                                                                                                                                                                                                                                                             |
| Musculoskeletal disorders                              | I27.1, I67.7, L93-L93.2, M00-M03.0, M03.2-M03.6, M05-M09.0, M09.2-M09.8, M30-M32.9, M34-M36.8, M40-M43.1, M65-M65.0, M71.0-M71.1, M80-M82.8, M86.3-M86.4, M87-M87.0, M88-M89.0, M89.5, M89.7-M89.9                                                                                                                                                                                                                                                                                                                                                                                                                                                                                                                                                                                                       | 416.1, 437.4, 446-446.9, 695.4-695.5, 710-711.9, 714-714.3, 714.8-714.9, 730.1, 732-732.9, 733.0-733.1                                                                                                                                                                                                                                                                                                                                                                                                |
| Rheumatoid arthritis                                   | M05-M06.9, M08.0-M08.8                                                                                                                                                                                                                                                                                                                                                                                                                                                                                                                                                                                                                                                                                                                                                                                   | 714-714.3, 714.8-714.9                                                                                                                                                                                                                                                                                                                                                                                                                                                                                |
| Other musculoskeletal disorders                        | I27.1, I67.7, L93-L93.2, M00-M03.0, M03.2-M03.6, M07-M08, M08.9-M09.0, M09.2-M09.8, M30-M32.9, M34-M36.8, M40-M43.1, M65-M65.0, M71.0-M71.1, M80-M82.8, M86.3-M86.4, M87-M87.0, M88-M89.0, M89.5, M89.7-M89.9                                                                                                                                                                                                                                                                                                                                                                                                                                                                                                                                                                                            | 416.1, 437.4, 446-446.9, 695.4-695.5, 710-711.9, 730.1, 732-732.9, 733.0-733.1                                                                                                                                                                                                                                                                                                                                                                                                                        |
| Other non-communicable diseases                        | D25-D26, D28.2, D52.1, D55-D58.9, D59.0-D59.3, D59.5-D59.6, D60-D61.9, D64.0, D66-D67, D68.0-D69.8, D70-D75.8, D76-D78.8, D86.8, D89-D89.3, E03-E07.1, E09-E09.9, E15.0, E16.0-E16.9, E20-E34.8, E36-E36.8, E65-E68, E70-E85.2, E88-E89.9, G24.0, G25.1, G25.4, G25.6-G25.7, G72.0, G93.7, G97-G97.9, I95.2-I95.3, I97-I97.9, I98.9, J70.0-J70.5, J95-J95.9, K43-K43.9, K62.7, K91-K91.9, K94-K95.8, M87.1, N10-N12.9, N14-N15, N15.1-N16.8, N20-N23.0, N25-N28.1, N29-N32.0, N32.3-N32.4, N34-N34.3, N36-N36.9, N39-N39.2, N41-N41.9, N44-N44.0, N45-N45.9, N49-N49.9, N65-N65.1, N72-N72.0, N75-N77.8, N80-N81.9, N83-N83.9, N99-N99.9, P96.0, P96.2, P96.5, Q00-Q07.9, Q10.4-Q18.9, Q20-Q28.9, Q30-Q36, Q37-Q45.9, Q50-Q60.6, Q63-Q86, Q86.1-Q87.8, Q89-Q89.8, Q90-Q93.9, Q95-Q99.8, R50.2, R95-R95.9 | 218-219, 219.1-219.9, 236.0, 240-243.9, 244.0-244.1, 244.3-244.8, 245-246.9, 251-259.9, 270-273.9, 275-276, 277-277.2, 277.4-277.9, 278.0-278.8, 282-284.9, 286-286.5, 286.7-289.7, 357.6, 518.7, 519.0, 536.4, 539-539.9, 551.2, 552.2, 564.2-564.4, 569.6, 579.3, 588-588.9, 590-590.9, 592-593.8, 594-599.6, 599.8, 601-602.9, 604-604.9, 608.2, 617-618.9, 620-620.9, 621.4-621.9, 622.3-622.6, 629-629.8, 740-749.0, 749.2-752.9, 753.4-758.9, 759.0-759.8, 775.3, 779.4-779.5, 788.0, 798-798.0 |
| Congenital birth defects                               | P96.0, Q00-Q07.9, Q10.4-Q18.9, Q20-Q28.9, Q30-Q36, Q37-Q45.9, Q50-Q60.6, Q63-Q86, Q86.1-Q87.8, Q89-Q89.8, Q90-Q93.9, Q95-Q99.8                                                                                                                                                                                                                                                                                                                                                                                                                                                                                                                                                                                                                                                                           | 740-749.0, 749.2-752.9, 753.4-758.9, 759.0-759.8                                                                                                                                                                                                                                                                                                                                                                                                                                                      |
| Neural tube defects                                    | Q00-Q01.9, Q05-Q05.9                                                                                                                                                                                                                                                                                                                                                                                                                                                                                                                                                                                                                                                                                                                                                                                     | 740-741.9, 742.0                                                                                                                                                                                                                                                                                                                                                                                                                                                                                      |
| Congenital heart anomalies                             | Q20-Q28.9                                                                                                                                                                                                                                                                                                                                                                                                                                                                                                                                                                                                                                                                                                                                                                                                | 745-747.9                                                                                                                                                                                                                                                                                                                                                                                                                                                                                             |
| Orofacial clefts                                       | Q35-Q36, Q37-Q37.9                                                                                                                                                                                                                                                                                                                                                                                                                                                                                                                                                                                                                                                                                                                                                                                       | 749-749.0, 749.2-749.9                                                                                                                                                                                                                                                                                                                                                                                                                                                                                |
| Down syndrome                                          | Q90-Q90.9                                                                                                                                                                                                                                                                                                                                                                                                                                                                                                                                                                                                                                                                                                                                                                                                | 758.0                                                                                                                                                                                                                                                                                                                                                                                                                                                                                                 |
| Other chromosomal abnormalities                        | Q87-Q87.8, Q91-Q93.9, Q95-Q95.9, Q97-Q97.9, Q99-Q99.8                                                                                                                                                                                                                                                                                                                                                                                                                                                                                                                                                                                                                                                                                                                                                    | 758, 758.1-758.6, 758.8-758.9                                                                                                                                                                                                                                                                                                                                                                                                                                                                         |
| Congenital musculoskeletal and limb anomalies          | Q65-Q79, Q79.6-Q79.9                                                                                                                                                                                                                                                                                                                                                                                                                                                                                                                                                                                                                                                                                                                                                                                     | 742.5, 754-756.5, 756.8-756.9                                                                                                                                                                                                                                                                                                                                                                                                                                                                         |
| Urogenital congenital anomalies                        | P96.0, Q50-Q56.4, Q60-Q60.6, Q63-Q64.9                                                                                                                                                                                                                                                                                                                                                                                                                                                                                                                                                                                                                                                                                                                                                                   | 752-752.9, 753.4-753.9                                                                                                                                                                                                                                                                                                                                                                                                                                                                                |
| Digestive congenital anomalies                         | Q38-Q45.9, Q79.0-Q79.5                                                                                                                                                                                                                                                                                                                                                                                                                                                                                                                                                                                                                                                                                                                                                                                   | 750-751.9, 756.6-756.7                                                                                                                                                                                                                                                                                                                                                                                                                                                                                |
| Other congenital birth defects                         | Q02-Q04.9, Q06-Q07.9, Q10.4-Q18.9, Q30-Q34.9, Q57, Q80-Q86, Q86.1-Q86.8, Q89-Q89.8                                                                                                                                                                                                                                                                                                                                                                                                                                                                                                                                                                                                                                                                                                                       | 742, 742.1-742.4, 742.8-744.9, 748-748.9, 757-757.9, 759.0-759.8                                                                                                                                                                                                                                                                                                                                                                                                                                      |
| Urinary diseases and male infertility                  | N10-N12.9, N15, N15.1-N16.8, N20-N23.0, N25-N28.1, N29-N32.0, N32.3-N32.4, N34-N34.3, N36-N36.9, N39-N39.2, N41-N41.9, N44-N44.0, N45-N45.9, N49-N49.9                                                                                                                                                                                                                                                                                                                                                                                                                                                                                                                                                                                                                                                   | 588-588.9, 590-590.9, 592-593.8, 594-598.1, 598.8-599.6, 599.8, 601-602.9, 604-604.9, 608.2, 788.0                                                                                                                                                                                                                                                                                                                                                                                                    |
| Urinary tract infections                               | N10-N12.9, N15, N15.1-N16.8, N30-N30.9, N34-N34.3, N39.0-N39.2                                                                                                                                                                                                                                                                                                                                                                                                                                                                                                                                                                                                                                                                                                                                           | 590-590.9, 595-595.9, 597-597.9, 599.0                                                                                                                                                                                                                                                                                                                                                                                                                                                                |
| Urolithiasis                                           | N20-N23.0                                                                                                                                                                                                                                                                                                                                                                                                                                                                                                                                                                                                                                                                                                                                                                                                | 592-592.9, 594-594.9, 788.0                                                                                                                                                                                                                                                                                                                                                                                                                                                                           |
| Other urinary diseases                                 | N25-N28.1, N29-N29.8, N31-N32.0, N32.3-N32.4, N36-N36.9, N39, N41-N41.9, N44-N44.0, N45-N45.9, N49-N49.9                                                                                                                                                                                                                                                                                                                                                                                                                                                                                                                                                                                                                                                                                                 | 588-588.9, 593-593.8, 596-596.9, 598-598.1, 598.8-599, 599.1-599.6, 599.8, 601-602.9, 604-604.9, 608.2                                                                                                                                                                                                                                                                                                                                                                                                |
| Gynecological diseases                                 | D25-D26, D28.2, E28.2, N72-N72.0, N75-N77.8, N80-N81.9, N83-N83.9                                                                                                                                                                                                                                                                                                                                                                                                                                                                                                                                                                                                                                                                                                                                        | 218-219, 219.1-219.9, 236.0, 256.4, 617-618.9, 620-620.9, 621.4-621.9, 622.3-622.6, 629-629.8                                                                                                                                                                                                                                                                                                                                                                                                         |
| Uterine fibroids                                       | D25-D26, D28.2                                                                                                                                                                                                                                                                                                                                                                                                                                                                                                                                                                                                                                                                                                                                                                                           | 218-219, 219.1-219.9, 236.0                                                                                                                                                                                                                                                                                                                                                                                                                                                                           |
| Polycystic ovarian syndrome                            | E28.2                                                                                                                                                                                                                                                                                                                                                                                                                                                                                                                                                                                                                                                                                                                                                                                                    | 256.4                                                                                                                                                                                                                                                                                                                                                                                                                                                                                                 |
| Endometriosis                                          | N80-N80.9                                                                                                                                                                                                                                                                                                                                                                                                                                                                                                                                                                                                                                                                                                                                                                                                | 617-617.9                                                                                                                                                                                                                                                                                                                                                                                                                                                                                             |
| Genital prolapse                                       | N81-N81.9                                                                                                                                                                                                                                                                                                                                                                                                                                                                                                                                                                                                                                                                                                                                                                                                | 618-618.9                                                                                                                                                                                                                                                                                                                                                                                                                                                                                             |
| Other gynecological diseases                           | N72-N72.0, N75-N77.8, N83-N83.9                                                                                                                                                                                                                                                                                                                                                                                                                                                                                                                                                                                                                                                                                                                                                                          | 620-620.9, 621.4-621.9, 622.3-622.6, 629-629.8                                                                                                                                                                                                                                                                                                                                                                                                                                                        |
| Hemoglobinopathies and hemolytic anemias               | D55-D58.9, D59.1, D59.3, D59.5, D60-D61.9, D64.0                                                                                                                                                                                                                                                                                                                                                                                                                                                                                                                                                                                                                                                                                                                                                         | 282-284.9                                                                                                                                                                                                                                                                                                                                                                                                                                                                                             |
| Thalassemias                                           | D56-D56.9                                                                                                                                                                                                                                                                                                                                                                                                                                                                                                                                                                                                                                                                                                                                                                                                | 282.4-282.5                                                                                                                                                                                                                                                                                                                                                                                                                                                                                           |

| Cause                                             | ICD10                                                                                                                                                                                                                                                                                                                                                                                                                       | ICD9                                                                                                                                                                                                                                                               |
|---------------------------------------------------|-----------------------------------------------------------------------------------------------------------------------------------------------------------------------------------------------------------------------------------------------------------------------------------------------------------------------------------------------------------------------------------------------------------------------------|--------------------------------------------------------------------------------------------------------------------------------------------------------------------------------------------------------------------------------------------------------------------|
| Sickle cell disorders                             | D57-D57.8                                                                                                                                                                                                                                                                                                                                                                                                                   | 282.6                                                                                                                                                                                                                                                              |
| G6PD deficiency                                   | D55-D55.2                                                                                                                                                                                                                                                                                                                                                                                                                   | 282.2-282.3                                                                                                                                                                                                                                                        |
| Other hemoglobinopathies and hemolytic anemias    | D55.3-D55.9, D58-D58.9, D59.1, D59.3, D59.5, D60-D61.9, D64.0                                                                                                                                                                                                                                                                                                                                                               | 282-282.1, 282.7-284.9                                                                                                                                                                                                                                             |
| Endocrine, metabolic, blood, and immune disorders | D52.1, D59.0, D59.2, D59.6, D66-D67, D68.0-D69.8, D70-D75.8, D76-D78.8, D86.8, D89-D89.3, E03-E07.1, E09-E09.9, E15.0, E16.0-E16.9, E20-E28.1, E28.3-E34.8, E36-E36.8, E65-E68, E70-E85.2, E88-E89.9, G24.0, G25.1, G25.4, G25.6-G25.7, G72.0, G93.7, G97-G97.9, I95.2-I95.3, I97-I97.9, I98.9, J70.0-J70.5, J95-J95.9, K43-K43.9, K62.7, K91-K91.9, K94-K95.8, M87.1, N14-N14.4, N65-N65.1, N99-N99.9, P96.2, P96.5, R50.2 | 240-243.9, 244.0-244.1, 244.3-244.8, 245-246.9, 251-256.3, 256.8-259.9, 270-273.9, 275-276, 277-277.2, 277.4-277.9, 278.0-278.8, 286-286.5, 286.7-289.7, 357.6, 518.7, 519.0, 536.4, 539-539.9, 551.2, 552.2, 564.2-564.4, 569.6, 579.3, 598.2, 775.3, 779.4-779.5 |
| Sudden infant death syndrome                      | R95-R95.9                                                                                                                                                                                                                                                                                                                                                                                                                   | 798-798.0                                                                                                                                                                                                                                                          |
| Injuries                                          | L55-L55.9, L56.3, L56.8-L56.9, L58-L58.9, U00-U03, V00-V86.9, V87.2-V87.3, V88.2-V88.3, V90-V98.8, W00-W46.2, W49-W62.9, W64-W70.9, W73-W75.9, W77-W81.9, W83-W94.9, W97.9, W99-X06.9, X08-X39.9, X46-X48.9, X50-X54.9, X57-X58.9, X60-X64.9, X66-Y08.9, Y35-Y84.9, Y87.0-Y87.1, Y88-Y88.3, Y89.0-Y89.1                                                                                                                     | 349.0-349.1, 457.0, E800-E807, E830-E838, E840-E849, E856-E857, E861-E865, E867-E869, E870-E876, E878-E879, E880-E886, E888-E928, E930-E979, E990-E999                                                                                                             |
| Transport injuries                                | V00-V86.9, V87.2-V87.3, V88.2-V88.3, V90-V98.8                                                                                                                                                                                                                                                                                                                                                                              | E800-E807, E830-E838, E840-E849                                                                                                                                                                                                                                    |
| Road injuries                                     | V01-V04.9, V06-V80.9, V82-V82.9, V87.2-V87.3                                                                                                                                                                                                                                                                                                                                                                                |                                                                                                                                                                                                                                                                    |
| Pedestrian road injuries                          | V01-V04.9, V06-V09.9                                                                                                                                                                                                                                                                                                                                                                                                        |                                                                                                                                                                                                                                                                    |
| Cyclist road injuries                             | V10-V19.9                                                                                                                                                                                                                                                                                                                                                                                                                   |                                                                                                                                                                                                                                                                    |
| Motorcyclist road injuries                        | V20-V29.9                                                                                                                                                                                                                                                                                                                                                                                                                   |                                                                                                                                                                                                                                                                    |
| Motor vehicle road injuries                       | V30-V79.9, V87.2-V87.3                                                                                                                                                                                                                                                                                                                                                                                                      |                                                                                                                                                                                                                                                                    |
| Other road injuries                               | V80-V80.9, V82-V82.9                                                                                                                                                                                                                                                                                                                                                                                                        |                                                                                                                                                                                                                                                                    |
| Other transport injuries                          | V00-V00.8, V05-V05.9, V81-V81.9, V83-V86.9, V88.2-V88.3, V90-V98.8                                                                                                                                                                                                                                                                                                                                                          | E800-E807, E830-E838, E840-E849                                                                                                                                                                                                                                    |
| Unintentional injuries                            | L55-L55.9, L56.3, L56.8-L56.9, L58-L58.9, W00-W46.2, W49-W62.9, W64-W70.9, W73-W75.9, W77-W81.9, W83-W94.9, W97.9, W99-X06.9, X08-X39.9, X46-X48.9, X50-X54.9, X57-X58.9, Y40-Y84.9, Y88-Y88.3                                                                                                                                                                                                                              | 349.0-349.1, 457.0, E856-E857, E861-E865, E867-E869, E870-E876, E878-E879, E880-E886, E888-E928, E930-E949                                                                                                                                                         |
| Falls                                             | W00-W19.9                                                                                                                                                                                                                                                                                                                                                                                                                   | E880-E886, E888                                                                                                                                                                                                                                                    |
| Drowning                                          | W65-W70.9, W73-W74.9                                                                                                                                                                                                                                                                                                                                                                                                        | E910                                                                                                                                                                                                                                                               |
| Fire, heat, and hot substances                    | X00-X06.9, X08-X19.9                                                                                                                                                                                                                                                                                                                                                                                                        | E890-E899, E924                                                                                                                                                                                                                                                    |
| Poisonings                                        | X46-X48.9                                                                                                                                                                                                                                                                                                                                                                                                                   | E856-E857, E861-E865, E867-E869                                                                                                                                                                                                                                    |
| Poisoning by carbon monoxide                      | X47-X47.9                                                                                                                                                                                                                                                                                                                                                                                                                   | E862, E868-E869                                                                                                                                                                                                                                                    |
| Poisoning by other means                          | X46-X46.9, X48-X48.9                                                                                                                                                                                                                                                                                                                                                                                                        | E856-E857, E861, E863-E865, E867                                                                                                                                                                                                                                   |
| Exposure to mechanical forces                     | W20-W38.9, W40-W43.9, W45.0-W45.2, W46-W46.2, W49-W52                                                                                                                                                                                                                                                                                                                                                                       | E916-E922                                                                                                                                                                                                                                                          |
| Unintentional firearm injuries                    | W32-W34.9                                                                                                                                                                                                                                                                                                                                                                                                                   | E922                                                                                                                                                                                                                                                               |
| Other exposure to mechanical forces               | W20-W31.9, W35-W38.9, W40-W43.9, W45.0-W45.2, W46-W46.2, W49-W52                                                                                                                                                                                                                                                                                                                                                            | E916-E921                                                                                                                                                                                                                                                          |
| Adverse effects of medical treatment              | Y40-Y84.9, Y88-Y88.3                                                                                                                                                                                                                                                                                                                                                                                                        | 349.0-349.1, 457.0, E870-E876, E878-E879, E930-E949                                                                                                                                                                                                                |
| Animal contact                                    | W52.0-W62.9, W64-W64.9, X20-X29.9                                                                                                                                                                                                                                                                                                                                                                                           | E905-E906                                                                                                                                                                                                                                                          |
| Venomous animal contact                           | X20-X29.9                                                                                                                                                                                                                                                                                                                                                                                                                   | E905                                                                                                                                                                                                                                                               |
| Non-venomous animal contact                       | W52.0-W62.9, W64-W64.9                                                                                                                                                                                                                                                                                                                                                                                                      | E906                                                                                                                                                                                                                                                               |
| Foreign body                                      | W44-W45, W45.3-W45.9, W75-W75.9, W78-W80.9, W83-W84.9                                                                                                                                                                                                                                                                                                                                                                       | E911-E915                                                                                                                                                                                                                                                          |
| Pulmonary aspiration and foreign body in airway   | W75-W75.9, W78-W80.9, W83-W84.9                                                                                                                                                                                                                                                                                                                                                                                             | E911-E913                                                                                                                                                                                                                                                          |
| Foreign body in other body part                   | W44-W45, W45.3-W45.9                                                                                                                                                                                                                                                                                                                                                                                                        | E914-E915                                                                                                                                                                                                                                                          |
| Environmental heat and cold exposure              | L55-L55.9, L56.3, L56.8-L56.9, L58-L58.9, W88-W94.9, W97.9, W99-W99.9, X30-X32.9, X39-X39.9                                                                                                                                                                                                                                                                                                                                 | E900-E902, E926                                                                                                                                                                                                                                                    |
| Exposure to forces of nature                      | X33-X38.9                                                                                                                                                                                                                                                                                                                                                                                                                   | E907-E909                                                                                                                                                                                                                                                          |
| Other unintentional injuries                      | W39-W39.9, W77-W77.9, W81-W81.9, W85-W87.9, X50-X54.9, X57-X58.9                                                                                                                                                                                                                                                                                                                                                            | E903-E904, E923, E925, E927-E928                                                                                                                                                                                                                                   |
| Self-harm and interpersonal violence              | U00-U03, X60-X64.9, X66-Y08.9, Y35-Y38.9, Y87.0-Y87.1, Y89.0-Y89.1                                                                                                                                                                                                                                                                                                                                                          | E950-E979, E990-E999                                                                                                                                                                                                                                               |
| Self-harm                                         | X60-X64.9, X66-X84.9, Y87.0                                                                                                                                                                                                                                                                                                                                                                                                 | E950-E959                                                                                                                                                                                                                                                          |
| Self-harm by firearm                              | X72-X74.9                                                                                                                                                                                                                                                                                                                                                                                                                   | E955                                                                                                                                                                                                                                                               |
| Self-harm by other specified means                | X60-X64.9, X66-X71.9, X75-X84.9, Y87.0                                                                                                                                                                                                                                                                                                                                                                                      | E950-E954, E956-E959                                                                                                                                                                                                                                               |
| Interpersonal violence                            | X85-Y08.9, Y87.1                                                                                                                                                                                                                                                                                                                                                                                                            | E960-E969                                                                                                                                                                                                                                                          |
| Physical violence by firearm                      | X93-X95.9                                                                                                                                                                                                                                                                                                                                                                                                                   | E965                                                                                                                                                                                                                                                               |
| Physical violence by sharp object                 | X99-X99.9                                                                                                                                                                                                                                                                                                                                                                                                                   | E966                                                                                                                                                                                                                                                               |
| Physical violence by other means                  | X85-X92.9, X96-X98.9, Y00-Y04.9, Y06-Y08.9, Y87.1                                                                                                                                                                                                                                                                                                                                                                           | E961-E964, E967-E969                                                                                                                                                                                                                                               |
| Conflict and terrorism                            | U00-U03, Y36-Y38.9, Y89.1                                                                                                                                                                                                                                                                                                                                                                                                   | E979, E990-E999                                                                                                                                                                                                                                                    |
| Executions and police conflict                    | Y35-Y35.9, Y89.0                                                                                                                                                                                                                                                                                                                                                                                                            | E970-E978                                                                                                                                                                                                                                                          |
| None                                              |                                                                                                                                                                                                                                                                                                                                                                                                                             |                                                                                                                                                                                                                                                                    |
| Still Born                                        | P95-P95.9                                                                                                                                                                                                                                                                                                                                                                                                                   | 768.0-768.1                                                                                                                                                                                                                                                        |

| Cause                      | ICD10                                                                                                                                                                                                                                                                                                                                                                                                                                                                                                                                                                                                                                                                                                                                                                                                                                                                                                                                                                                                                                                                                                                                                                                                                                                                                                                                                                                                                                                                                                                                                                                                                                                                                       | ICD9                                                                                                                                                                                                                                                                                                                                                                                                                                                                                                                                                                                                                                                                                                                                                                                                                                                                                                                                                                                                                                                                                                                                                                                                                                                                                    |
|----------------------------|---------------------------------------------------------------------------------------------------------------------------------------------------------------------------------------------------------------------------------------------------------------------------------------------------------------------------------------------------------------------------------------------------------------------------------------------------------------------------------------------------------------------------------------------------------------------------------------------------------------------------------------------------------------------------------------------------------------------------------------------------------------------------------------------------------------------------------------------------------------------------------------------------------------------------------------------------------------------------------------------------------------------------------------------------------------------------------------------------------------------------------------------------------------------------------------------------------------------------------------------------------------------------------------------------------------------------------------------------------------------------------------------------------------------------------------------------------------------------------------------------------------------------------------------------------------------------------------------------------------------------------------------------------------------------------------------|-----------------------------------------------------------------------------------------------------------------------------------------------------------------------------------------------------------------------------------------------------------------------------------------------------------------------------------------------------------------------------------------------------------------------------------------------------------------------------------------------------------------------------------------------------------------------------------------------------------------------------------------------------------------------------------------------------------------------------------------------------------------------------------------------------------------------------------------------------------------------------------------------------------------------------------------------------------------------------------------------------------------------------------------------------------------------------------------------------------------------------------------------------------------------------------------------------------------------------------------------------------------------------------------|
| Garbage Code (GBD Level 1) | A31-A31.9, A40-A44.9, A48.0, A48.3, A49.0-A49.1, A59-A59.9, A71-A71.9, A74.0, B07-B07.9, B30-B30.9, B35-B46.9, B49-B49.9, B55.1-B55.2, B58-B59.9, B85-B85.4, B87-B88.9, B94.0, C46-C46.9, D50-D50.0, D50.9, D62-D63.0, D63.8-D64, D64.1-D65.9, D68, D69.9, D80-D84.9, D89.8-D89.9, E12-E15, E16, E50-E50.9, E64.1, E85.3-E87.6, E87.8-E87.9, F06.2-F06.4, F07.2, F09-F09.9, F17-F17.9, F20-F23.9, F25-F49, F51-F99.0, G06-G08.0, G32-G32.8, G43-G44.2, G44.4-G44.8, G47-G47.2, G47.4-G47.9, G50-G60.9, G62-G65.2, G80-G83.9, G89-G89.4, G91-G91.2, G91.4-G92.9, G93.1-G93.2, G93.4-G93.6, G98, G99-H05, H05.2-H69.9, H71-H99, I26-I26.9, I31.2-I31.4, I37.9, I46-I46.9, I50-I50.9, I51.7, I67.4, I76, I95-I95.1, I95.8-I95.9, J40-J40.9, J47-J47.9, J69-J69.9, J80-J80.9, J85-J85.3, J86-J86.9, J93-J93.1, J93.8-J93.9, J94.2, J96-J96.9, J98.1-J98.3, K00-K19, K30, K65-K66.1, K66.9, K70.4-K71.6, K71.8-K73.9, K75.0, L20-L30.9, L40-L50.9, L52-L54.8, L56-L56.2, L56.4-L56.5, L57-L57.9, L59-L68.9, L70-L76.8, L80-L87.9, L90-L92.9, L94-L96, L98.5-L99.8, M04, M10-M12.0, M12.2-M29, M37-M39, M43.2-M49, M49.2-M64, M65.1-M71, M71.2-M72.4, M72.8-M73, M73.8-M79.9, M83-M86.2, M86.5-M86.9, M87.2-M87.9, M89.1-M89.4, M90-M99.9, N17-N17.9, N19-N19.9, N32.1-N32.2, N32.8-N33.8, N35-N35.9, N37-N37.8, N39.3-N39.8, N42-N43.4, N44.1-N44.8, N46-N48.9, N50-N53.9, N61-N64.9, N82-N82.9, N91-N91.5, N95, N95.1-N95.9, N97-N97.9, R02-R02.9, R03.1, R07.0, R08-R09, R09.3, R11-R12.0, R14-R15.9, R19-R19.6, R19.8-R23, R23.1-R30.9, R32-R50.1, R50.8-R57.9, R58.0-R78, R78.6-R94.8, R96-R99.9, U05, U07-U81, U89.9-U99, X40-X44.9, X49-X49.9, Y10-Y14.9, Y16-Y19.9, Z00-Z15.8, Z17-unsnp. | 031-031.9, 038-039.9, 040.0, 041.1, 076-078.2, 085.1-085.5, 088.0-088.7, 110-118.9, 125-125.3, 126-126.9, 127.2-127.9, 130-132.9, 133.8-134.9, 136.3-136.5, 139.1, 139.9, 176-176.9, 247-248, 250-250.9, 264-264.9, 274-274.9, 276.0-276.5, 276.7-276.9, 277.3, 279-281, 285-285.9, 286.6, 293, 294-294.0, 295-302.9, 306-307.0, 307.2-307.4, 307.6-319.9, 324-327.1, 328-329, 338-339.1, 339.3-339.8, 342-344.9, 346-347.9, 350-353.5, 354-355.9, 357.2, 360-376, 376.2-380.9, 384-389.9, 415-415.9, 423.0, 424, 427.5, 427.9-428.9, 429.3, 437.3, 458-458.9, 459.0, 490-490.9, 494-494.9, 507-507.9, 510-510.9, 512-513.9, 518.0-518.2, 518.5, 520-529.9, 536.3, 536.8-536.9, 537.7, 537.9, 564.8-564.9, 567-568.9, 570-570.9, 572-572.1, 573.1-573.3, 584-584.9, 586-587.9, 603-603.9, 605-608.1, 608.3-609, 611-612.1, 615-616.9, 619-619.9, 621-621.3, 622-622.0, 622.8-623.6, 623.8-624.5, 624.8-628.9, 629.9, 690-693.9, 695.8-706.9, 708-709.9, 712-713.8, 715-716, 716.2-721.6, 721.8-730.0, 730.2-730.3, 730.7-731.9, 733, 733.2-734.2, 737-738, 738.2-739.9, 780-782.3, 782.6-784.6, 784.9, 785.4-786, 786.6, 786.8, 787, 787.3-788, 788.3-789, 790-790.2, 790.4-796.1, 796.3-797.9, 798.1-799, 799.2-799.9, 999.0-999.9, E851-E855, E858, E866, E980-E982, V01-V08, V10-uns |
| Garbage Code (GBD Level 2) | A14.9, A29-A30.9, A45-A45.9, A47-A48, A48.8-A49, A49.3-A49.9, A61-A62, A72-A73, A76, A97, B08-B09, B11-B14, B28-B29, B31-B32.4, B34-B34.9, B61-B62, B68-B68.9, B73-B74.2, B76-B76.9, B78-B81.8, B84, B92-B94, B94.8-B94.9, B95.6-B97.3, B97.7-B99.9, D59, D59.4, D59.8-D59.9, G44.3, G91.3, G93.0, G93.3, I10-I10.9, I15-I15.9, I27-I27.0, I27.2-I27.9, I28.9, I70-I70.1, I70.9, I74-I75.8, J81-J81.1, J90-J90.0, J94-J94.1, J94.8-J94.9, K92.0-K92.2, N70-N71.9, N73-N74.0, N74.2-N74.8, R03-R03.0, R04-R06.9, R09.0-R09.2, R09.8-R10.9, R13-R13.9, R16-R18.9, R23.0, R58, S00-T98.3, W47-W48, W63, W71-W72, W76-W76.9, W82, W95-W97, W98, X07, X55-X56, X59-X59.9, Y20-Y34.9, Y86-Y87, Y87.2, Y89, Y89.9-Y99.9                                                                                                                                                                                                                                                                                                                                                                                                                                                                                                                                                                                                                                                                                                                                                                                                                                                                                                                                                                            | 000-000.9, 030-030.9, 041.2-041.9, 067-069, 078.8-078.9, 079.8-079.9, 089-089.9, 105-109.9, 119, 136.8-136.9, 139.8, 304, 304.9, 339.2, 401-401.9, 405-405.9, 416-416.0, 416.2-416.9, 440-440.1, 440.3, 440.8-440.9, 444-445.8, 511-511.9, 514-514.9, 515.0-515.9, 518, 518.3-518.4, 518.8, 536.2, 578-578.9, 599.7, 613-614.9, 714.4, 716.1, 721.7, 735-736.9, 738.0-738.1, 782.4, 784.7-784.8, 786.3, 787.0, 787.2, 789.0-789.9, 796.2, 799.0-799.1, 800-999, E000-E80, E83, E839, E85, E859, E87, E877, E88, E887, E929, E983-E985, E988-E989                                                                                                                                                                                                                                                                                                                                                                                                                                                                                                                                                                                                                                                                                                                                        |
| Garbage Code (GBD Level 3) | A01, A49.2, A64-A64.0, A99-A99.0, B89, C14-C14.9, C26-C29, C35-C36, C39-C39.9, C42, C55-C55.9, C57.9, C59, C63.9, C68, C68.9, C75.9-C80.9, C87, C97-D00.0, D01, D01.4-D02, D02.4-D02.9, D07, D07.3, D07.6-D09, D09.1, D09.7, D09.9-D10, D10.9, D13, D13.9-D14, D14.4, D17-D21.9, D28, D28.9-D29, D29.9-D30, D30.9, D36.0, D36.9-D37.0, D37.6-D38, D38.6-D39.0, D39.7, D39.9-D40, D40.9-D41, D41.9, D44, D44.9, D48, D48.7-D49.1, D49.5, D49.7-D49.9, D54, D75.9, D79, D85, D87-D88, D90-D99, E07.8-E08.9, E17-E19, E34.9-E35.8, E37-E39, E47-E49., E62, E69, E87.7, E90-E998, F04-F06.1, F06.5-F07.0, F07.8-F08, F50, F50.8-F50.9, G09-G09.9, G15-G19, G21-G21.2, G21.4-G22.0, G27-G29, G33-G34, G38-G39., G42, G48-G49, G66-G69, G74-G79, G84-G88, G93, G93.8-G94.8, G96-G96.9, G98.0-G98.9, I00.0, I03-I04., I14-I14.1, I16-I19, I29-I29.9, I44-I45.9, I49-I49.9, I51, I51.6, I51.8-I59, I90-I94, I96-I96.9, I98.4-I98.8, I99-ID5.9, J02.9, J03.9, J04.3, J06, J06.9, J48-J59, J71-J79, J81.9, J83, J85.9, J87-J89, J90.9, J93.6, J97-J98.0, J98.4-J99.8, K31.9-K34, K39, K47-K49, K53-K54, K63-K63.4, K63.8-K63.9, K69, K75, K78-K79, K84, K87-K89, K92, K92.9-K93, K96-K99, L06-L07, L09, L15-L19, L31-L39, L69, L77-L79, N09, N13-N13.9, N24, N28.8-N28.9, N38, N39.9-N40.9, N54-N59, N66-N69, N78-N79, N84, N84.2-N86, N88-N90.9, N92-N94.9, N95.0, O08-O08.9, O17-O19, O27, O37-O39, O49-O59, O78-O79, O93-O95.9, P06, P16-P18, P30-P34.2, P40-P49, P62-P69, P73, P79, P82, P85-P89, P96.9-P99.9, Q08-Q10.3, Q19, Q29-Q29., Q36.0-Q36.9, Q46-Q49, Q88, Q89.9, Q94, Q99.9-R01.2, R07, R07.1-R07.9, R31-R31.9                                                                          | 002, 085, 085.9, 149-149.9, 159-159.9, 165-169, 177-179.9, 183.9-184, 184.5, 184.9, 187, 187.9, 189, 189.9, 194.9-199.9, 209, 209.2-209.3, 209.6-210, 211, 211.9-212, 212.9, 214-216.9, 221, 221.9-222, 222.9-223, 223.9, 229, 229.1, 229.9-230.0, 230.9-231, 231.8-231.9, 233, 233.3, 233.6, 233.9-234, 234.9-235, 235.1-235.3, 235.5, 235.9-236, 236.3, 236.6, 236.9, 237.4, 239-239.1, 239.5, 239.7-239.9, 249-249.9, 276.6, 278, 293.0-293.9, 331.3-331.4, 332.1-332.9, 348-348.9, 349.9, 357, 357.8-357.9, 399-400.0, 406-409.4, 418-419.9, 426-426.9, 427.4, 429, 429.2, 429.4-429.9, 459.5-459.9, 464.5, 465, 465.9, 505-505.9, 519, 519.8-519.9, 544-549, 553.8-553.9, 559-559.0, 560.4-560.7, 561, 562.2-563, 569, 569.8-569.9, 591-591.9, 593.9, 599.9-600.9, 623.7, 624.6, 637-637.9, 639-639.9, 749.1, 759, 759.9, 779.9, 782.5, 785-785.3, 786.0-786.2, 786.4-786.5, 786.7, 786.9, 788.1-788.2, E986-E987                                                                                                                                                                                                                                                                                                                                                                  |
| Garbage Code (GBD Level 4) | B54-B55, B55.9, B64, B82-B82.9, B83.9, G00, G00.9-G02.8, G03.9, I42-I42.0, I42.9, I51.5, I64-I64.9, I67, I67.8-I68, I68.8-I69, I69.4-I69.9, J07-J08, J15.9, J17-J19.6, J22-J29, J64-J64.9, P23, P23.5-P23.9, P37.3-P37.4, V87-V87.1, V87.4-V88.1, V88.4-V89.9, V99-V99.0, Y09-Y09.9, Y85-Y85.9                                                                                                                                                                                                                                                                                                                                                                                                                                                                                                                                                                                                                                                                                                                                                                                                                                                                                                                                                                                                                                                                                                                                                                                                                                                                                                                                                                                              | 084, 084.6, 238, 244, 244.9, 289.8-289.9, 307.5, 320, 320.9, 425, 425.4, 425.9, 429.1, 436-437, 437.9-439.6, 482.9-483, 484, 484.8-486.9, 770.0, E808-E829                                                                                                                                                                                                                                                                                                                                                                                                                                                                                                                                                                                                                                                                                                                                                                                                                                                                                                                                                                                                                                                                                                                              |

**Appendix Table 5. Restrictions on age and sex by cause for GBD 2017**

| Cause                                                                         | Minimum Age | Maximum Age | Sex Restrictions |
|-------------------------------------------------------------------------------|-------------|-------------|------------------|
| HIV/AIDS and sexually transmitted infections                                  | 7 days      |             |                  |
| HIV/AIDS                                                                      | 28 days     |             |                  |
| HIV/AIDS - Drug-susceptible Tuberculosis                                      | 28 days     |             |                  |
| HIV/AIDS - Multidrug-resistant Tuberculosis without extensive drug resistance | 28 days     |             |                  |
| HIV/AIDS - Extensively drug-resistant Tuberculosis                            | 28 days     |             |                  |
| HIV/AIDS resulting in other diseases                                          | 28 days     |             |                  |
| Sexually transmitted infections excluding HIV                                 |             |             |                  |
| Syphilis                                                                      |             |             |                  |
| Chlamydial infection                                                          | 10          |             |                  |
| Gonococcal infection                                                          | 10          |             |                  |
| Other sexually transmitted infections                                         | 10          |             |                  |
| Respiratory infections and tuberculosis                                       | 7 days      |             |                  |
| Tuberculosis                                                                  | 28 days     |             |                  |
| Drug-susceptible tuberculosis                                                 | 28 days     |             |                  |
| Multidrug-resistant tuberculosis without extensive drug resistance            | 28 days     |             |                  |
| Extensively drug-resistant tuberculosis                                       | 28 days     |             |                  |
| Lower respiratory infections                                                  |             |             |                  |
| Upper respiratory infections                                                  |             |             |                  |
| Otitis media                                                                  |             |             |                  |
| Enteric infections                                                            |             |             |                  |
| Diarrhoeal diseases                                                           |             |             |                  |
| Typhoid and paratyphoid                                                       | 7 days      |             |                  |
| Typhoid fever                                                                 | 28 days     |             |                  |
| Paratyphoid fever                                                             | 28 days     |             |                  |
| iNTS                                                                          | 7 days      |             |                  |
| Other intestinal infectious diseases                                          | 28 days     |             |                  |
| Neglected tropical diseases and malaria                                       |             |             |                  |
| Malaria                                                                       | 7 days      |             |                  |
| Chagas disease                                                                | 28 days     |             |                  |
| Leishmaniasis                                                                 | 28 days     |             |                  |
| Visceral leishmaniasis                                                        | 28 days     |             |                  |
| African trypanosomiasis                                                       | 1           |             |                  |
| Schistosomiasis                                                               | 28 days     |             |                  |
| Cysticercosis                                                                 |             |             |                  |
| Cystic echinococcosis                                                         | 1           |             |                  |
| Dengue                                                                        | 28 days     |             |                  |
| Yellow fever                                                                  | 7 days      |             |                  |
| Rabies                                                                        | 28 days     |             |                  |
| Intestinal nematode infections                                                | 28 days     |             |                  |
| Ascariasis                                                                    | 28 days     |             |                  |
| Ebola virus disease                                                           |             |             |                  |
| Zika virus disease                                                            |             |             |                  |
| Other neglected tropical diseases                                             |             |             |                  |
| Other infectious diseases                                                     |             |             |                  |
| Meningitis                                                                    |             |             |                  |
| Pneumococcal meningitis                                                       |             |             |                  |
| H influenzae type B meningitis                                                |             |             |                  |
| Meningococcal infection                                                       |             |             |                  |
| Other meningitis                                                              |             |             |                  |
| Encephalitis                                                                  |             |             |                  |
| Diphtheria                                                                    | 28 days     | 59          |                  |
| Whooping cough                                                                | 28 days     | 59          |                  |
| Tetanus                                                                       |             |             |                  |
| Measles                                                                       | 28 days     | 59          |                  |
| Varicella and herpes zoster                                                   |             |             |                  |
| Acute hepatitis                                                               | 28 days     |             |                  |

**Appendix Table 5. Restrictions on age and sex by cause for GBD 2017**

| Cause                                                    | Minimum Age | Maximum Age | Sex Restrictions |
|----------------------------------------------------------|-------------|-------------|------------------|
| Acute hepatitis A                                        | 28 days     |             |                  |
| Acute hepatitis B                                        | 28 days     |             |                  |
| Acute hepatitis C                                        | 28 days     |             |                  |
| Acute hepatitis E                                        | 28 days     |             |                  |
| Other unspecified infectious diseases                    |             |             |                  |
| Maternal and neonatal disorders                          |             | 54          |                  |
| Maternal disorders                                       | 10          | 54          | Females Only     |
| Maternal haemorrhage                                     | 10          | 54          | Females Only     |
| Maternal sepsis and other pregnancy related infections   | 10          | 54          | Females Only     |
| Maternal hypertensive disorders                          | 10          | 54          | Females Only     |
| Maternal obstructed labour and uterine rupture           | 10          | 54          | Females Only     |
| Maternal abortive outcome                                | 10          | 54          | Females Only     |
| Ectopic pregnancy                                        | 10          | 54          | Females Only     |
| Indirect maternal deaths                                 | 10          | 54          | Females Only     |
| Late maternal deaths                                     | 10          | 54          | Females Only     |
| Maternal deaths aggravated by HIV/AIDS                   | 10          | 54          | Females Only     |
| Other maternal disorders                                 | 10          | 54          | Females Only     |
| Neonatal disorders                                       |             | 4           |                  |
| Neonatal preterm birth                                   |             | 4           |                  |
| Neonatal encephalopathy due to birth asphyxia and trauma |             | 4           |                  |
| Neonatal sepsis and other neonatal infections            |             | 4           |                  |
| Hemolytic disease and other neonatal jaundice            |             | 4           |                  |
| Other neonatal disorders                                 |             | 4           |                  |
| Nutritional deficiencies                                 | 28 days     |             |                  |
| Protein-energy malnutrition                              | 28 days     |             |                  |
| Other nutritional deficiencies                           | 28 days     |             |                  |
| Neoplasms                                                |             |             |                  |
| Lip and oral cavity cancer                               | 15          |             |                  |
| Nasopharynx cancer                                       | 5           |             |                  |
| Other pharynx cancer                                     | 15          |             |                  |
| Oesophageal cancer                                       | 15          |             |                  |
| Stomach cancer                                           | 15          |             |                  |
| Colon and rectum cancer                                  | 15          |             |                  |
| Liver cancer                                             | 5           |             |                  |
| Liver cancer due to hepatitis B                          | 5           |             |                  |
| Liver cancer due to hepatitis C                          | 5           |             |                  |
| Liver cancer due to alcohol use                          | 15          |             |                  |
| Liver cancer due to NASH                                 | 15          |             |                  |
| Liver cancer due to other causes                         | 5           |             |                  |
| Gallbladder and biliary tract cancer                     | 15          |             |                  |
| Pancreatic cancer                                        | 15          |             |                  |
| Larynx cancer                                            | 15          |             |                  |
| Tracheal, bronchus, and lung cancer                      | 15          |             |                  |
| Malignant skin melanoma                                  | 15          |             |                  |
| Non-melanoma skin cancer                                 | 15          |             |                  |
| Non-melanoma skin cancer (squamous-cell carcinoma)       | 15          |             |                  |
| Breast cancer                                            | 15          |             |                  |
| Cervical cancer                                          | 15          |             | Females Only     |
| Uterine cancer                                           | 15          |             | Females Only     |
| Ovarian cancer                                           | 15          |             | Females Only     |
| Prostate cancer                                          | 15          |             | Males Only       |
| Testicular cancer                                        | 15          |             | Males Only       |
| Kidney cancer                                            |             |             |                  |
| Bladder cancer                                           | 15          |             |                  |
| Brain and nervous system cancer                          |             |             |                  |
| Thyroid cancer                                           | 10          |             |                  |
| Mesothelioma                                             | 15          |             |                  |

**Appendix Table 5. Restrictions on age and sex by cause for GBD 2017**

| Cause                                                                  | Minimum Age | Maximum Age | Sex Restrictions |
|------------------------------------------------------------------------|-------------|-------------|------------------|
| Hodgkin lymphoma                                                       |             |             |                  |
| Non-Hodgkin's lymphoma                                                 |             |             |                  |
| Multiple myeloma                                                       | 15          |             |                  |
| Leukaemia                                                              |             |             |                  |
| Acute lymphoid leukaemia                                               |             |             |                  |
| Chronic lymphoid leukaemia                                             | 15          |             |                  |
| Acute myeloid leukaemia                                                |             |             |                  |
| Chronic myeloid leukaemia                                              | 15          |             |                  |
| Other leukaemia                                                        |             |             |                  |
| Other malignant cancers                                                |             |             |                  |
| Other neoplasms                                                        |             |             |                  |
| Myelodysplastic, myeloproliferative, and other hematopoietic neoplasms |             |             |                  |
| Other benign and in situ neoplasms                                     |             |             |                  |
| Cardiovascular diseases                                                |             |             |                  |
| Rheumatic heart disease                                                | 1           |             |                  |
| Ischaemic heart disease                                                | 15          |             |                  |
| Stroke                                                                 |             |             |                  |
| Ischaemic stroke                                                       |             |             |                  |
| Intracerebral hemorrhage                                               |             |             |                  |
| Subarachnoid hemorrhage                                                |             |             |                  |
| Hypertensive heart disease                                             | 15          |             |                  |
| Non-rheumatic valvular heart disease                                   | 15          |             |                  |
| Non-rheumatic calcific aortic valve disease                            | 15          |             |                  |
| Non-rheumatic degenerative mitral valve disease                        | 15          |             |                  |
| Other non-rheumatic valve diseases                                     | 15          |             |                  |
| Cardiomyopathy and myocarditis                                         |             |             |                  |
| Myocarditis                                                            |             |             |                  |
| Alcoholic cardiomyopathy                                               | 15          |             |                  |
| Other cardiomyopathy                                                   |             |             |                  |
| Atrial fibrillation and flutter                                        | 30          |             |                  |
| Aortic aneurysm                                                        | 15          |             |                  |
| Peripheral vascular disease                                            | 40          |             |                  |
| Endocarditis                                                           |             |             |                  |
| Other cardiovascular and circulatory diseases                          |             |             |                  |
| Chronic respiratory diseases                                           |             |             |                  |
| Chronic obstructive pulmonary disease                                  | 28 days     |             |                  |
| Pneumoconiosis                                                         | 15          |             |                  |
| Silicosis                                                              | 15          |             |                  |
| Asbestosis                                                             | 15          |             |                  |
| Coal workers pneumoconiosis                                            | 15          |             |                  |
| Other pneumoconiosis                                                   | 15          |             |                  |
| Asthma                                                                 | 1           |             |                  |
| Interstitial lung disease and pulmonary sarcoidosis                    | 1           |             |                  |
| Other chronic respiratory diseases                                     |             |             |                  |
| Digestive diseases                                                     |             |             |                  |
| Cirrhosis and other chronic liver diseases                             | 1           |             |                  |
| Cirrhosis and other chronic liver diseases due to hepatitis B          | 1           |             |                  |
| Cirrhosis and other chronic liver diseases due to hepatitis C          | 1           |             |                  |
| Cirrhosis and other chronic liver diseases due to alcohol use          | 15          |             |                  |
| Cirrhosis due to NASH                                                  | 15          |             |                  |
| Cirrhosis and other chronic liver diseases due to other causes         | 1           |             |                  |
| Upper digestive system diseases                                        | 1           |             |                  |
| Peptic ulcer disease                                                   | 1           |             |                  |
| Gastritis and duodenitis                                               | 1           |             |                  |
| Appendicitis                                                           | 1           |             |                  |
| Paralytic ileus and intestinal obstruction                             |             |             |                  |



**Appendix Table 5. Restrictions on age and sex by cause for GBD 2017**

| Cause                                                      | Minimum Age | Maximum Age | Sex Restrictions |
|------------------------------------------------------------|-------------|-------------|------------------|
| Inguinal, femoral, and abdominal hernia                    | 1           |             |                  |
| Inflammatory bowel disease                                 | 1           |             |                  |
| Vascular intestinal disorders                              | 1           |             |                  |
| Gallbladder and biliary diseases                           | 1           |             |                  |
| Pancreatitis                                               | 1           |             |                  |
| Other digestive diseases                                   | 1           |             |                  |
| Neurological disorders                                     | 28 days     |             |                  |
| Alzheimer's disease and other dementias                    | 40          |             |                  |
| Parkinson's disease                                        | 20          |             |                  |
| Epilepsy                                                   | 28 days     |             |                  |
| Multiple sclerosis                                         | 20          |             |                  |
| Motor neuron disease                                       |             |             |                  |
| Other neurological disorders                               | 28 days     |             |                  |
| Mental disorders                                           |             |             |                  |
| Eating disorders                                           | 5           | 49          |                  |
| Anorexia nervosa                                           | 5           | 49          |                  |
| Bulimia nervosa                                            | 5           | 49          |                  |
| Substance use disorders                                    |             |             |                  |
| Alcohol use disorders                                      | 15          |             |                  |
| Drug use disorders                                         |             |             |                  |
| Opioid use disorders                                       |             |             |                  |
| Cocaine use disorders                                      | 15          |             |                  |
| Amphetamine use disorders                                  | 15          |             |                  |
| Other drug use disorders                                   | 15          |             |                  |
| Diabetes and kidney diseases                               |             |             |                  |
| Diabetes mellitus                                          |             |             |                  |
| Diabetes mellitus type 1                                   |             |             |                  |
| Diabetes mellitus type 2                                   | 15          |             |                  |
| Chronic kidney disease                                     | 28 days     |             |                  |
| Chronic kidney disease due to diabetes mellitus type 1     | 28 days     |             |                  |
| Chronic kidney disease due to diabetes mellitus type 2     | 28 days     |             |                  |
| Chronic kidney disease due to hypertension                 | 28 days     |             |                  |
| Chronic kidney disease due to glomerulonephritis           | 28 days     |             |                  |
| Chronic kidney disease due to other and unspecified causes | 28 days     |             |                  |
| Acute glomerulonephritis                                   | 28 days     |             |                  |
| Skin and subcutaneous diseases                             | 28 days     |             |                  |
| Bacterial skin diseases                                    | 7 days      |             |                  |
| Cellulitis                                                 | 28 days     |             |                  |
| Pyoderma                                                   | 28 days     |             |                  |
| Decubitus ulcer                                            | 1           |             |                  |
| Other skin and subcutaneous diseases                       | 28 days     |             |                  |
| Musculoskeletal disorders                                  | 5           |             |                  |
| Rheumatoid arthritis                                       | 5           |             |                  |
| Other musculoskeletal disorders                            | 5           |             |                  |
| Other non-communicable diseases                            |             |             |                  |
| Congenital anomalies                                       |             | 69          |                  |
| Neural tube defects                                        |             | 69          |                  |
| Congenital heart anomalies                                 |             | 69          |                  |
| Orofacial clefts                                           |             | 4           |                  |
| Down's syndrome                                            |             | 69          |                  |
| Other chromosomal abnormalities                            |             | 69          |                  |
| Congenital musculoskeletal and limb anomalies              |             | 69          |                  |
| Urogenital congenital anomalies                            |             | 69          |                  |
| Digestive congenital anomalies                             |             | 69          |                  |
| Other congenital anomalies                                 |             | 69          |                  |
| Urinary diseases and male infertility                      |             |             |                  |
| Urinary tract infections                                   |             |             |                  |

**Appendix Table 5. Restrictions on age and sex by cause for GBD 2017**

| Cause                                             | Minimum Age | Maximum Age | Sex Restrictions |
|---------------------------------------------------|-------------|-------------|------------------|
| Urolithiasis                                      | 5           |             |                  |
| Other urinary diseases                            |             |             |                  |
| Gynecological diseases                            | 15          |             | Females Only     |
| Uterine fibroids                                  | 15          |             | Females Only     |
| Polycystic ovarian syndrome                       | 15          | 54          | Females Only     |
| Endometriosis                                     | 15          | 54          | Females Only     |
| Genital prolapse                                  | 15          |             | Females Only     |
| Other gynecological diseases                      | 15          |             | Females Only     |
| Hemoglobinopathies and hemolytic anaemias         |             |             |                  |
| Thalassemias                                      |             |             |                  |
| Sickle cell disorders                             |             |             |                  |
| G6PD deficiency                                   |             |             |                  |
| Other hemoglobinopathies and hemolytic anaemias   |             |             |                  |
| Endocrine, metabolic, blood, and immune disorders |             |             |                  |
| Sudden infant death syndrome                      | 7 days      | 364 days    |                  |
| Transport injuries                                |             |             |                  |
| Road injuries                                     |             |             |                  |
| Pedestrian road injuries                          |             |             |                  |
| Cyclist road injuries                             | 1           |             |                  |
| Motorcyclist road injuries                        |             |             |                  |
| Motor vehicle road injuries                       |             |             |                  |
| Other road injuries                               |             |             |                  |
| Other transport injuries                          |             |             |                  |
| Unintentional injuries                            |             |             |                  |
| Falls                                             |             |             |                  |
| Drowning                                          |             |             |                  |
| Fire, heat, and hot substances                    |             |             |                  |
| Poisonings                                        |             |             |                  |
| Poisoning by carbon monoxide                      |             |             |                  |
| Poisoning by other means                          |             |             |                  |
| Exposure to mechanical forces                     |             |             |                  |
| Unintentional firearm injuries                    |             |             |                  |
| Other exposure to mechanical forces               |             |             |                  |
| Adverse effects of medical treatment              |             |             |                  |
| Animal contact                                    |             |             |                  |
| Venomous animal contact                           |             |             |                  |
| Non-venomous animal contact                       |             |             |                  |
| Foreign body                                      |             |             |                  |
| Pulmonary aspiration and foreign body in airway   |             |             |                  |
| Foreign body in other body part                   |             |             |                  |
| Environmental heat and cold exposure              |             |             |                  |
| Exposure to forces of nature                      |             |             |                  |
| Other unintentional injuries                      |             |             |                  |
| Self-harm and interpersonal violence              |             |             |                  |
| Self-harm                                         | 10          |             |                  |
| Self-harm by firearm                              | 10          |             |                  |
| Self-harm by other specified means                | 10          |             |                  |
| Interpersonal violence                            |             |             |                  |
| Assault by firearm                                |             |             |                  |
| Assault by sharp object                           |             |             |                  |
| Assault by other means                            |             |             |                  |
| Conflict and terrorism                            |             |             |                  |
| Executions and police conflict                    | 28 days     |             |                  |

**Appendix Table 6. HIV/AIDS-related garbage code redistribution packages**

| Package name                                      | ICD9 codes                                                                                                                                                                                                                   | ICD10 codes                                                                                                                                                                |
|---------------------------------------------------|------------------------------------------------------------------------------------------------------------------------------------------------------------------------------------------------------------------------------|----------------------------------------------------------------------------------------------------------------------------------------------------------------------------|
| Actinomycosis                                     | 39, 39.0, 39.1, 39.2, 39.3, 39.4, 39.6, 39.8, 39.9, 113, 113.2, 113.4, 113.5, 113.6                                                                                                                                          | A42, A42.0, A42.1, A42.2, A42.7, A42.8, A42.81, A42.82, A42.89, A42.9                                                                                                      |
| Bartonellosis                                     | 88.0, 88.2, 88.3, 88.5, 88.7                                                                                                                                                                                                 | A44, A44.0, A44.1, A44.8, A44.9                                                                                                                                            |
| Urogenital Candidiasis                            | 112.1, 112.2                                                                                                                                                                                                                 | B37.3, B37.4, B37.41, B37.42, B37.49                                                                                                                                       |
| Candidiasis                                       | 112, 112.0, 112.3, 112.4, 112.5, 112.6, 112.8, 112.81, 112.82, 112.83, 112.84, 112.85, 112.89, 112.9                                                                                                                         | B37, B37.0, B37.1, B37.2, B37.5, B37.6, B37.7, B37.8, B37.81, B37.82, B37.83, B37.84, B37.89, B37.9                                                                        |
| Coccidioidomycosis                                | 114, 114.0, 114.1, 114.2, 114.3, 114.4, 114.5, 114.6, 114.9                                                                                                                                                                  | B38, B38.0, B38.1, B38.2, B38.3, B38.4, B38.7, B38.8, B38.81, B38.89, B38.9                                                                                                |
| Histoplasmosis                                    | 115, 115.0, 115.00, 115.01, 115.02, 115.03, 115.04, 115.05, 115.09, 115.1, 115.10, 115.11, 115.12, 115.13, 115.14, 115.15, 115.19, 115.2, 115.3, 115.4, 115.5, 115.9, 115.90, 115.91, 115.92, 115.93, 115.94, 115.95, 115.99 | B39, B39.0, B39.1, B39.2, B39.3, B39.4, B39.5, B39.9                                                                                                                       |
| Blastomycosis                                     | 116, 116.0, 116.2, 116.3, 116.4, 116.5, 116.6, 116.9                                                                                                                                                                         | B40, B40.0, B40.1, B40.2, B40.3, B40.7, B40.8, B40.81, B40.89, B40.9                                                                                                       |
| Paracoccidioidomycosis                            | 116.1                                                                                                                                                                                                                        | B41, B41.0, B41.7, B41.8, B41.9                                                                                                                                            |
| Sporotrichosis & Chromomycosis                    | 117.1                                                                                                                                                                                                                        | B42, B42.0, B42.1, B42.7, B42.8, B42.81, B42.82, B42.89, B42.9, B43, B43.0, B43.1, B43.2, B43.8, B43.9                                                                     |
| Aspergillosis                                     | 117.3                                                                                                                                                                                                                        | B44, B44.0, B44.1, B44.2, B44.7, B44.8, B44.81, B44.89, B44.9                                                                                                              |
| Zygomycosis                                       | 117.7                                                                                                                                                                                                                        | B46, B46.0, B46.1, B46.2, B46.3, B46.4, B46.5, B46.8, B46.9                                                                                                                |
| Toxoplasmosis                                     | 130, 130.0, 130.1, 130.2, 130.3, 130.4, 130.5, 130.6, 130.7, 130.8, 130.9                                                                                                                                                    | B58, B58.0, B58.00, B58.01, B58.09, B58.1, B58.2, B58.3, B58.8, B58.81, B58.82, B58.83, B58.89, B58.9                                                                      |
| Pneumocystosis, Psorospermiasis, Sarcosporidiosis | 136.3, 136.4, 136.5                                                                                                                                                                                                          | B59, B59.0, B59.9                                                                                                                                                          |
| Cryptococcosis                                    | 117.5                                                                                                                                                                                                                        | B45, B45.0, B45.1, B45.2, B45.3, B45.7, B45.8, B45.9                                                                                                                       |
| Chromoblastomycosis / Nocardiosis                 | 117.2                                                                                                                                                                                                                        | A43, A43.0, A43.1, A43.8, A43.9                                                                                                                                            |
| Mycoses / Unspecified mycosis                     | 117, 117.0, 117.4, 117.6, 117.8, 117.9, 118, 118.0, 118.1, 118.2, 118.3, 118.4, 118.5, 118.6, 118.9                                                                                                                          | B49, B49.5, B49.9                                                                                                                                                          |
| Cutaneous leishmaniasis                           | 85.1, 85.2, 85.3, 85.4, 85.5                                                                                                                                                                                                 | B55.1, B55.2                                                                                                                                                               |
| Other Mycobacterial infection                     | 31, 31.0, 31.2, 31.8, 31.9                                                                                                                                                                                                   | A31, A31.0, A31.8, A31.9                                                                                                                                                   |
| Mycobacterial skin infection                      | 31.1                                                                                                                                                                                                                         | A31.1, A31.2                                                                                                                                                               |
| Immunodeficiency - antibody                       | 279.0, 279.00, 279.01, 279.02, 279.03, 279.04, 279.05, 279.06, 279.09, 279.1                                                                                                                                                 | D80, D80.0, D80.1, D80.2, D80.3, D80.4, D80.5, D80.6, D80.7, D80.8, D80.9                                                                                                  |
| Immunodeficiency - WBC                            | 279.10, 279.11, 279.12, 279.13, 279.19, 279.2, 279.3, 279.4, 279.41, 279.49                                                                                                                                                  | D81, D81.0, D81.1, D81.2, D81.3, D81.4, D81.5, D81.6, D81.7, D81.8, D81.81, D81.810, D81.818, D81.819, D81.89, D81.9, D82, D82.0, D82.1, D82.2, D82.3, D82.4, D82.8, D82.9 |
| Immunodeficiency - other                          | 279, 279.5, 279.50, 279.51, 279.52, 279.53, 279.6, 279.8, 279.9                                                                                                                                                              | D83, D83.0, D83.1, D83.2, D83.8, D83.9, D84, D84.0, D84.1, D84.8, D84.9, D89.8, D89.81, D89.810, D89.811, D89.812, D89.813, D89.82, D89.89, D89.9                          |

**Appendix Table 6 HIV/AIDS-related garbage code redistribution packages**

| Package name     | ICD9 codes                                                  | ICD10 codes                                                                                       |
|------------------|-------------------------------------------------------------|---------------------------------------------------------------------------------------------------|
| Kaposi's sarcoma | 176, 176.0, 176.1, 176.2, 176.3, 176.4, 176.5, 176.8, 176.9 | C46, C46.0, C46.1, C46.2, C46.3, C46.4, C46.5, C46.50, C46.51, C46.52, C46.6, C46.7, C46.8, C46.9 |

**Appendix Table 7. Data quality rating from 0 to 5 stars, maximum percent well certified per 5-year interval and percent well certified across time series for 195 countries, 1980-2017**

| Country                        | Data Quality Rating | 1980-1984 | 1985-1989 | 1990-1994 | 1995-1999 | 2000-2004 | 2005-2009 | 2010-2017 | 1980-2017 |
|--------------------------------|---------------------|-----------|-----------|-----------|-----------|-----------|-----------|-----------|-----------|
| Afghanistan                    | 1                   | 0.0       | 0.0       | 0.0       | 0.0       | 4.6       | 38.2      | 0.0       | 6.1       |
| Albania                        | 3                   | 0.0       | 66.1      | 68.6      | 70.7      | 71.8      | 72.5      | 54.7      | 57.8      |
| Algeria                        | 1                   | 0.0       | 0.0       | 0.0       | 0.0       | 0.0       | 17.3      | 0.0       | 2.5       |
| American Samoa                 | 3                   | 0.0       | 0.0       | 0.0       | 73.7      | 78.2      | 83.4      | 79.4      | 45.0      |
| Andorra                        | 0                   | 0.0       | 0.0       | 0.0       | 0.0       | 0.0       | 0.0       | 0.0       | 0.0       |
| Angola                         | 1                   | 0.0       | 0.0       | 0.0       | 0.0       | 0.0       | 0.0       | 4.4       | 0.6       |
| Antigua and Barbuda            | 4                   | 60.9      | 72.0      | 75.1      | 79.5      | 79.3      | 80.0      | 74.7      | 74.5      |
| Argentina                      | 4                   | 77.4      | 70.9      | 69.7      | 68.5      | 66.7      | 66.6      | 69.9      | 70.0      |
| Armenia                        | 5                   | 74.2      | 78.1      | 85.0      | 88.8      | 88.9      | 92.7      | 91.9      | 85.6      |
| Australia                      | 5                   | 93.2      | 93.6      | 92.9      | 92.5      | 91.1      | 90.5      | 90.0      | 91.9      |
| Austria                        | 5                   | 90.9      | 90.9      | 90.0      | 88.6      | 91.9      | 90.8      | 89.2      | 90.2      |
| Azerbaijan                     | 3                   | 75.5      | 75.4      | 78.1      | 72.0      | 68.2      | 41.8      | 0.0       | 58.7      |
| Bahrain                        | 3                   | 0.0       | 78.1      | 0.0       | 61.6      | 64.6      | 55.9      | 56.8      | 45.3      |
| Bangladesh                     | 1                   | 2.8       | 4.5       | 25.7      | 4.4       | 12.4      | 6.3       | 6.3       | 8.9       |
| Barbados                       | 4                   | 75.0      | 75.8      | 77.6      | 77.4      | 75.6      | 82.1      | 82.0      | 77.9      |
| Belarus                        | 4                   | 84.0      | 88.9      | 80.1      | 82.9      | 85.4      | 84.5      | 85.0      | 84.4      |
| Belgium                        | 4                   | 77.8      | 77.6      | 81.3      | 84.1      | 82.8      | 82.7      | 80.4      | 81.0      |
| Belize                         | 4                   | 47.5      | 52.4      | 49.8      | 76.6      | 78.3      | 87.1      | 89.1      | 68.7      |
| Benin                          | 1                   | 0.0       | 0.6       | 0.0       | 0.0       | 0.0       | 0.0       | 0.0       | 0.1       |
| Bermuda                        | 5                   | 90.4      | 88.7      | 90.2      | 93.5      | 91.1      | 86.4      | 90.3      | 90.1      |
| Bhutan                         | 0                   | 0.0       | 0.0       | 0.0       | 0.0       | 0.0       | 0.0       | 0.0       | 0.0       |
| Bolivia                        | 1                   | 0.0       | 0.0       | 0.0       | 0.0       | 14.7      | 0.0       | 0.0       | 2.1       |
| Bosnia and Herzegovina         | 2                   | 0.0       | 65.8      | 67.1      | 0.0       | 0.0       | 0.0       | 71.4      | 29.2      |
| Botswana                       | 0                   | 0.0       | 0.0       | 0.0       | 0.0       | 0.0       | 0.0       | 0.0       | 0.0       |
| Brazil                         | 4                   | 54.0      | 58.9      | 65.2      | 68.9      | 74.6      | 80.7      | 82.5      | 69.3      |
| Brunei                         | 3                   | 0.0       | 0.0       | 0.0       | 66.7      | 73.2      | 76.1      | 74.5      | 41.5      |
| Bulgaria                       | 4                   | 81.7      | 82.3      | 79.6      | 76.5      | 71.8      | 73.5      | 70.2      | 76.5      |
| Burkina Faso                   | 1                   | 0.2       | 0.0       | 0.0       | 4.6       | 6.3       | 4.6       | 0.3       | 2.3       |
| Burundi                        | 1                   | 0.0       | 0.0       | 2.2       | 0.0       | 0.0       | 0.0       | 0.0       | 0.3       |
| Cambodia                       | 1                   | 0.0       | 0.0       | 0.0       | 0.0       | 1.6       | 4.4       | 0.0       | 0.9       |
| Cameroon                       | 0                   | 0.0       | 0.0       | 0.0       | 0.0       | 0.0       | 0.0       | 0.0       | 0.0       |
| Canada                         | 5                   | 89.4      | 90.0      | 89.1      | 88.6      | 89.3      | 89.4      | 90.1      | 89.4      |
| Cape Verde                     | 2                   | 56.1      | 0.0       | 0.1       | 0.0       | 0.0       | 0.0       | 67.7      | 17.7      |
| Central African Republic       | 0                   | 0.0       | 0.0       | 0.0       | 0.0       | 0.0       | 0.0       | 0.0       | 0.0       |
| Chad                           | 0                   | 0.0       | 0.0       | 0.0       | 0.0       | 0.0       | 0.0       | 0.0       | 0.0       |
| Chile                          | 4                   | 75.7      | 75.5      | 81.7      | 84.7      | 90.8      | 90.8      | 89.8      | 84.1      |
| China                          | 3                   | 0.0       | 0.9       | 73.8      | 75.1      | 70.3      | 73.0      | 73.5      | 52.4      |
| Colombia                       | 4                   | 72.4      | 74.4      | 77.3      | 88.0      | 88.6      | 88.9      | 88.5      | 82.6      |
| Comoros                        | 0                   | 0.0       | 0.0       | 0.0       | 0.0       | 0.0       | 0.0       | 0.0       | 0.0       |
| Congo (Brazzaville)            | 0                   | 0.0       | 0.0       | 0.0       | 0.0       | 0.0       | 0.0       | 0.0       | 0.0       |
| Costa Rica                     | 5                   | 81.6      | 83.4      | 82.5      | 91.1      | 92.3      | 90.6      | 90.5      | 87.4      |
| Cote d'Ivoire                  | 1                   | 0.0       | 1.2       | 1.2       | 0.0       | 0.0       | 0.2       | 0.2       | 0.4       |
| Croatia                        | 4                   | 0.0       | 84.4      | 85.3      | 82.6      | 86.1      | 88.3      | 92.3      | 74.1      |
| Cuba                           | 5                   | 84.7      | 85.1      | 84.9      | 88.9      | 90.2      | 91.0      | 91.5      | 88.0      |
| Cyprus                         | 2                   | 0.0       | 0.0       | 0.0       | 26.8      | 53.8      | 59.5      | 60.9      | 28.7      |
| Czech Republic                 | 4                   | 0.0       | 90.7      | 89.6      | 84.8      | 84.7      | 85.8      | 87.8      | 74.8      |
| DR Congo                       | 1                   | 0.0       | 2.3       | 3.0       | 0.0       | 0.0       | 0.0       | 0.0       | 0.8       |
| Denmark                        | 4                   | 84.5      | 82.9      | 83.1      | 85.8      | 85.4      | 84.5      | 84.6      | 84.4      |
| Djibouti                       | 0                   | 0.0       | 0.0       | 0.0       | 0.0       | 0.0       | 0.0       | 0.0       | 0.0       |
| Dominica                       | 4                   | 71.6      | 63.1      | 62.1      | 65.8      | 68.6      | 81.7      | 83.9      | 71.0      |
| Dominican Republic             | 3                   | 53.6      | 53.5      | 44.5      | 53.8      | 57.2      | 56.8      | 59.9      | 54.2      |
| Ecuador                        | 4                   | 73.0      | 72.4      | 72.9      | 69.8      | 66.4      | 62.9      | 70.4      | 69.7      |
| Egypt                          | 3                   | 35.0      | 48.2      | 46.8      | 0.0       | 43.9      | 42.7      | 48.2      | 37.8      |
| El Salvador                    | 3                   | 73.3      | 0.0       | 60.4      | 67.2      | 69.4      | 70.8      | 67.4      | 58.4      |
| Equatorial Guinea              | 0                   | 0.0       | 0.0       | 0.0       | 0.0       | 0.0       | 0.0       | 0.0       | 0.0       |
| Eritrea                        | 0                   | 0.0       | 0.0       | 0.0       | 0.0       | 0.0       | 0.0       | 0.0       | 0.0       |
| Estonia                        | 5                   | 92.1      | 92.7      | 93.8      | 93.1      | 92.5      | 94.1      | 93.9      | 93.2      |
| Ethiopia                       | 1                   | 0.0       | 1.2       | 2.5       | 0.6       | 5.0       | 4.6       | 4.6       | 2.6       |
| Federated States of Micronesia | 0                   | 0.0       | 0.0       | 0.0       | 0.0       | 0.0       | 0.0       | 0.0       | 0.0       |
| Fiji                           | 2                   | 0.0       | 0.0       | 0.0       | 34.8      | 58.0      | 63.9      | 70.0      | 32.4      |
| Finland                        | 5                   | 83.7      | 91.7      | 91.7      | 95.8      | 95.6      | 94.9      | 95.9      | 92.8      |
| France                         | 4                   | 76.1      | 78.4      | 79.1      | 79.0      | 79.1      | 79.4      | 77.4      | 78.3      |
| Gabon                          | 0                   | 0.0       | 0.0       | 0.0       | 0.0       | 0.0       | 0.0       | 0.0       | 0.0       |
| Georgia                        | 4                   | 83.4      | 80.7      | 81.3      | 77.7      | 78.7      | 62.2      | 58.9      | 74.7      |
| Germany                        | 4                   | 78.4      | 80.5      | 84.1      | 83.9      | 83.5      | 83.8      | 84.0      | 82.6      |
| Ghana                          | 1                   | 0.0       | 0.1       | 1.5       | 0.8       | 7.2       | 16.7      | 0.5       | 3.8       |
| Greece                         | 4                   | 80.2      | 81.6      | 71.7      | 72.0      | 72.6      | 77.9      | 76.2      | 76.0      |
| Greenland                      | 3                   | 0.0       | 0.0       | 0.0       | 90.2      | 89.7      | 89.6      | 87.6      | 51.0      |
| Grenada                        | 4                   | 67.7      | 63.4      | 64.0      | 63.2      | 77.0      | 79.9      | 85.9      | 71.6      |
| Guam                           | 3                   | 0.0       | 0.0       | 85.9      | 80.7      | 76.7      | 79.9      | 79.2      | 57.5      |
| Guatemala                      | 4                   | 80.1      | 75.0      | 73.9      | 72.6      | 73.3      | 75.2      | 78.0      | 75.4      |
| Guinea                         | 1                   | 0.0       | 0.0       | 0.0       | 3.2       | 0.0       | 0.0       | 0.0       | 0.5       |
| Guinea-Bissau                  | 1                   | 0.0       | 0.0       | 0.1       | 1.2       | 0.0       | 0.0       | 0.0       | 0.2       |
| Guyana                         | 4                   | 55.5      | 76.2      | 69.8      | 78.3      | 84.3      | 85.5      | 78.6      | 75.5      |

**Appendix Table 7. Data quality rating from 0 to 5 stars, maximum percent well certified per 5-year interval and percent well certified across time series for 195 countries, 1980-2017**

| Country                          | Data Quality Rating | 1980-1984 | 1985-1989 | 1990-1994 | 1995-1999 | 2000-2004 | 2005-2009 | 2010-2017 | 1980-2017 |
|----------------------------------|---------------------|-----------|-----------|-----------|-----------|-----------|-----------|-----------|-----------|
| Haiti                            | 1                   | 22.3      | 1.3       | 1.0       | 13.9      | 6.1       | 0.0       | 0.0       | 6.4       |
| Honduras                         | 2                   | 41.2      | 46.0      | 43.2      | 0.0       | 0.0       | 17.5      | 19.1      | 23.8      |
| Hungary                          | 5                   | 91.0      | 89.8      | 89.9      | 91.0      | 92.1      | 92.6      | 93.8      | 91.5      |
| Iceland                          | 5                   | 92.6      | 93.8      | 94.2      | 94.1      | 93.5      | 92.9      | 91.4      | 93.2      |
| India                            | 2                   | 2.8       | 3.0       | 2.9       | 5.2       | 6.3       | 52.7      | 49.0      | 17.4      |
| Indonesia                        | 2                   | 1.4       | 0.0       | 1.3       | 0.4       | 0.3       | 53.7      | 62.3      | 17.1      |
| Iran                             | 2                   | 0.0       | 0.0       | 0.0       | 0.0       | 52.8      | 63.7      | 80.3      | 28.1      |
| Iraq                             | 2                   | 0.0       | 0.0       | 0.0       | 0.0       | 0.0       | 45.8      | 56.7      | 14.6      |
| Ireland                          | 5                   | 90.3      | 91.6      | 91.7      | 90.9      | 90.2      | 92.4      | 92.3      | 91.3      |
| Israel                           | 4                   | 81.2      | 82.6      | 83.2      | 82.7      | 81.8      | 80.1      | 80.7      | 81.8      |
| Italy                            | 5                   | 88.8      | 88.4      | 88.5      | 87.8      | 88.1      | 88.7      | 88.3      | 88.4      |
| Jamaica                          | 4                   | 70.5      | 72.8      | 64.6      | 0.0       | 83.0      | 87.5      | 89.1      | 66.8      |
| Japan                            | 4                   | 82.6      | 81.0      | 81.5      | 87.6      | 85.7      | 84.4      | 81.3      | 83.4      |
| Jordan                           | 2                   | 0.0       | 0.0       | 0.0       | 1.9       | 70.1      | 76.5      | 74.1      | 31.8      |
| Kazakhstan                       | 5                   | 80.0      | 84.9      | 89.1      | 88.6      | 85.0      | 84.2      | 84.1      | 85.1      |
| Kenya                            | 1                   | 0.0       | 2.7       | 0.0       | 0.4       | 4.9       | 5.4       | 0.8       | 2.0       |
| Kiribati                         | 2                   | 0.0       | 0.0       | 47.9      | 66.6      | 35.6      | 0.0       | 0.0       | 21.4      |
| Kuwait                           | 4                   | 82.1      | 81.9      | 76.4      | 77.5      | 83.1      | 84.9      | 84.6      | 81.5      |
| Kyrgyzstan                       | 4                   | 67.5      | 75.9      | 72.5      | 74.4      | 87.4      | 92.9      | 93.2      | 80.6      |
| Laos                             | 1                   | 0.0       | 1.3       | 0.0       | 0.0       | 0.0       | 0.0       | 0.0       | 0.2       |
| Latvia                           | 5                   | 92.5      | 92.7      | 89.3      | 92.0      | 91.1      | 88.7      | 94.3      | 91.5      |
| Lebanon                          | 1                   | 0.0       | 3.5       | 0.0       | 0.0       | 0.0       | 0.0       | 0.0       | 0.5       |
| Lesotho                          | 0                   | 0.0       | 0.0       | 0.0       | 0.0       | 0.0       | 0.0       | 0.0       | 0.0       |
| Liberia                          | 1                   | 2.1       | 2.1       | 3.2       | 0.0       | 0.0       | 0.0       | 0.0       | 1.1       |
| Libya                            | 1                   | 0.0       | 0.0       | 0.0       | 0.0       | 0.0       | 12.6      | 0.0       | 1.8       |
| Lithuania                        | 5                   | 90.1      | 94.0      | 93.7      | 94.8      | 92.9      | 93.3      | 94.6      | 93.3      |
| Luxembourg                       | 4                   | 86.4      | 85.8      | 85.5      | 84.5      | 80.6      | 77.9      | 82.5      | 83.3      |
| Macedonia                        | 3                   | 0.0       | 0.0       | 82.5      | 83.8      | 84.5      | 81.7      | 79.6      | 58.9      |
| Madagascar                       | 1                   | 2.8       | 3.5       | 2.4       | 2.4       | 0.0       | 0.0       | 0.0       | 1.6       |
| Malawi                           | 1                   | 0.0       | 2.5       | 0.0       | 0.6       | 2.5       | 4.5       | 0.6       | 1.5       |
| Malaysia                         | 2                   | 46.9      | 0.0       | 0.0       | 32.1      | 37.3      | 42.0      | 40.2      | 28.4      |
| Maldives                         | 2                   | 0.0       | 0.0       | 0.0       | 0.0       | 44.0      | 46.6      | 60.1      | 21.5      |
| Mali                             | 1                   | 4.0       | 0.0       | 0.1       | 0.0       | 0.0       | 0.0       | 0.0       | 0.6       |
| Malta                            | 5                   | 81.2      | 86.3      | 88.7      | 90.0      | 90.3      | 92.8      | 89.5      | 88.4      |
| Marshall Islands                 | 0                   | 0.0       | 0.0       | 0.0       | 0.0       | 0.0       | 0.0       | 0.0       | 0.0       |
| Mauritania                       | 0                   | 0.0       | 0.0       | 0.0       | 0.0       | 0.0       | 0.0       | 0.0       | 0.0       |
| Mauritius                        | 4                   | 75.2      | 79.4      | 78.7      | 78.2      | 83.2      | 85.1      | 86.3      | 80.9      |
| Mexico                           | 4                   | 68.3      | 77.7      | 78.5      | 79.7      | 82.4      | 84.1      | 88.1      | 79.8      |
| Moldova                          | 5                   | 88.8      | 91.2      | 81.9      | 87.8      | 85.0      | 83.5      | 83.7      | 86.0      |
| Mongolia                         | 2                   | 0.0       | 0.0       | 61.2      | 0.0       | 19.6      | 21.4      | 83.4      | 26.5      |
| Montenegro                       | 2                   | 0.0       | 0.0       | 0.0       | 0.0       | 69.2      | 69.2      | 0.0       | 19.8      |
| Morocco                          | 2                   | 0.0       | 15.4      | 0.0       | 0.0       | 10.2      | 33.3      | 13.7      | 10.4      |
| Mozambique                       | 2                   | 0.0       | 0.0       | 0.0       | 0.1       | 16.2      | 63.4      | 0.0       | 11.4      |
| Myanmar                          | 1                   | 0.0       | 0.0       | 0.0       | 0.0       | 0.0       | 2.9       | 49.5      | 7.5       |
| Namibia                          | 0                   | 0.0       | 0.0       | 0.0       | 0.0       | 0.0       | 0.0       | 0.0       | 0.0       |
| Nepal                            | 1                   | 2.8       | 2.6       | 0.0       | 0.6       | 0.6       | 9.2       | 0.0       | 2.3       |
| Netherlands                      | 4                   | 88.5      | 86.7      | 85.2      | 83.9      | 82.3      | 83.2      | 83.3      | 84.7      |
| New Zealand                      | 5                   | 95.3      | 95.2      | 95.1      | 96.8      | 96.4      | 96.3      | 95.7      | 95.8      |
| Nicaragua                        | 3                   | 0.0       | 54.3      | 56.9      | 69.0      | 77.2      | 84.9      | 90.5      | 61.8      |
| Niger                            | 1                   | 0.0       | 0.0       | 0.0       | 0.0       | 0.0       | 35.7      | 0.0       | 5.1       |
| Nigeria                          | 1                   | 0.0       | 0.0       | 3.3       | 0.0       | 0.0       | 0.1       | 32.3      | 5.1       |
| North Korea                      | 0                   | 0.0       | 0.0       | 0.0       | 0.0       | 0.0       | 0.0       | 0.0       | 0.0       |
| Northern Mariana Islands         | 3                   | 0.0       | 0.0       | 0.0       | 75.3      | 71.4      | 80.3      | 82.5      | 44.2      |
| Norway                           | 5                   | 88.6      | 89.4      | 88.6      | 88.5      | 86.3      | 84.2      | 84.1      | 87.1      |
| Oman                             | 2                   | 0.0       | 0.0       | 0.0       | 0.0       | 0.0       | 73.2      | 34.4      | 15.4      |
| Pakistan                         | 1                   | 0.0       | 2.8       | 1.6       | 0.0       | 1.5       | 17.8      | 1.9       | 3.7       |
| Palestine                        | 2                   | 0.0       | 0.0       | 0.0       | 29.7      | 32.2      | 34.2      | 74.1      | 24.3      |
| Panama                           | 4                   | 72.3      | 75.3      | 0.0       | 83.5      | 86.6      | 86.3      | 84.0      | 69.7      |
| Papua New Guinea                 | 1                   | 9.4       | 3.4       | 0.0       | 0.0       | 0.0       | 0.0       | 28.8      | 6.0       |
| Paraguay                         | 3                   | 51.3      | 51.2      | 57.2      | 62.7      | 63.6      | 68.8      | 74.0      | 61.3      |
| Peru                             | 3                   | 54.9      | 36.1      | 37.2      | 51.1      | 63.3      | 65.4      | 65.9      | 53.4      |
| Philippines                      | 4                   | 68.2      | 71.1      | 65.9      | 68.6      | 74.3      | 74.1      | 74.8      | 71.0      |
| Poland                           | 4                   | 61.8      | 59.5      | 59.9      | 71.6      | 73.7      | 73.5      | 72.6      | 67.5      |
| Portugal                         | 4                   | 76.9      | 77.1      | 76.3      | 76.2      | 79.1      | 77.7      | 80.1      | 77.6      |
| Puerto Rico                      | 4                   | 78.6      | 76.7      | 83.9      | 83.2      | 83.6      | 83.6      | 84.4      | 82.0      |
| Qatar                            | 3                   | 14.7      | 18.9      | 0.0       | 55.1      | 56.3      | 64.9      | 46.1      | 36.6      |
| Romania                          | 4                   | 76.0      | 78.0      | 83.3      | 84.8      | 85.9      | 86.2      | 85.4      | 82.8      |
| Russian Federation               | 5                   | 93.0      | 87.3      | 90.7      | 87.6      | 88.0      | 89.3      | 88.8      | 89.3      |
| Rwanda                           | 1                   | 0.0       | 0.0       | 0.0       | 0.0       | 0.0       | 22.6      | 0.0       | 3.2       |
| Saint Lucia                      | 4                   | 66.8      | 68.2      | 73.2      | 72.1      | 80.0      | 79.0      | 85.6      | 75.0      |
| Saint Vincent and the Grenadines | 4                   | 72.3      | 63.4      | 61.2      | 85.3      | 85.1      | 87.6      | 87.3      | 77.5      |
| Samoa                            | 0                   | 0.0       | 0.0       | 0.0       | 0.0       | 0.0       | 0.0       | 0.0       | 0.0       |
| Sao Tome and Principe            | 1                   | 0.0       | 69.6      | 0.0       | 0.0       | 0.0       | 0.0       | 0.0       | 9.9       |
| Saudi Arabia                     | 2                   | 0.0       | 0.0       | 0.0       | 23.1      | 27.5      | 29.4      | 28.8      | 15.5      |

**Appendix Table 7. Data quality rating from 0 to 5 stars, maximum percent well certified per 5-year interval and percent well certified across time series for 195 countries, 1980-2017**

| Country                    | Data Quality Rating | 1980-1984 | 1985-1989 | 1990-1994 | 1995-1999 | 2000-2004 | 2005-2009 | 2010-2017 | 1980-2017 |
|----------------------------|---------------------|-----------|-----------|-----------|-----------|-----------|-----------|-----------|-----------|
| Senegal                    | 1                   | 2.0       | 2.5       | 2.6       | 2.5       | 0.0       | 0.0       | 0.0       | 1.4       |
| Serbia                     | 3                   | 0.0       | 0.0       | 0.0       | 66.7      | 70.8      | 74.9      | 69.6      | 40.3      |
| Seychelles                 | 3                   | 74.4      | 71.5      | 0.0       | 0.0       | 75.9      | 76.9      | 78.1      | 53.8      |
| Sierra Leone               | 1                   | 0.0       | 0.0       | 3.4       | 0.0       | 0.0       | 0.0       | 0.0       | 0.5       |
| Singapore                  | 5                   | 91.2      | 92.0      | 94.6      | 95.1      | 95.3      | 94.9      | 95.7      | 94.1      |
| Slovakia                   | 3                   | 0.0       | 0.0       | 82.7      | 81.9      | 84.9      | 90.2      | 92.9      | 61.8      |
| Slovenia                   | 4                   | 0.0       | 91.6      | 92.5      | 91.8      | 89.3      | 88.3      | 88.5      | 77.4      |
| Solomon Islands            | 1                   | 0.0       | 0.0       | 0.0       | 0.0       | 0.0       | 0.0       | 34.6      | 4.9       |
| Somalia                    | 0                   | 0.0       | 0.0       | 0.0       | 0.0       | 0.0       | 0.0       | 0.0       | 0.0       |
| South Africa               | 3                   | 0.0       | 0.0       | 1.0       | 67.8      | 72.0      | 72.3      | 70.7      | 40.5      |
| South Korea                | 4                   | 0.0       | 57.8      | 74.2      | 75.4      | 84.5      | 82.2      | 81.9      | 65.1      |
| South Sudan                | 0                   | 0.0       | 0.0       | 0.0       | 0.0       | 0.0       | 0.0       | 0.0       | 0.0       |
| Spain                      | 4                   | 77.3      | 79.4      | 82.6      | 83.8      | 83.1      | 84.0      | 84.8      | 82.1      |
| Sri Lanka                  | 3                   | 52.0      | 50.2      | 47.7      | 55.4      | 63.7      | 67.4      | 64.8      | 57.3      |
| Sudan                      | 0                   | 0.0       | 0.0       | 0.0       | 0.0       | 0.0       | 0.0       | 0.0       | 0.0       |
| Suriname                   | 4                   | 60.0      | 63.7      | 61.2      | 66.4      | 74.3      | 73.3      | 73.9      | 67.5      |
| Swaziland                  | 1                   | 0.0       | 0.0       | 0.0       | 0.0       | 0.0       | 0.0       | 0.0       | 0.0       |
| Sweden                     | 5                   | 87.4      | 88.6      | 88.2      | 87.1      | 85.7      | 85.9      | 84.8      | 86.8      |
| Switzerland                | 4                   | 73.8      | 74.2      | 73.4      | 84.6      | 84.4      | 86.7      | 86.1      | 80.5      |
| Syria                      | 3                   | 29.5      | 13.2      | 0.0       | 54.3      | 66.7      | 74.4      | 59.8      | 42.5      |
| Taiwan (Province of China) | 4                   | 84.3      | 82.4      | 79.2      | 83.4      | 84.4      | 84.8      | 83.7      | 83.2      |
| Tajikistan                 | 3                   | 74.9      | 71.4      | 71.6      | 58.5      | 51.4      | 50.6      | 50.7      | 61.3      |
| Tanzania                   | 1                   | 0.0       | 2.8       | 1.8       | 2.1       | 6.3       | 2.5       | 0.0       | 2.2       |
| Thailand                   | 3                   | 29.9      | 28.3      | 35.9      | 62.6      | 52.0      | 61.6      | 62.3      | 47.5      |
| The Bahamas                | 4                   | 76.2      | 82.6      | 83.0      | 89.8      | 87.7      | 86.7      | 86.3      | 84.6      |
| The Gambia                 | 1                   | 2.8       | 2.2       | 2.1       | 0.9       | 0.7       | 1.0       | 0.0       | 1.4       |
| Timor-Leste                | 0                   | 0.0       | 0.0       | 0.0       | 0.0       | 0.0       | 0.0       | 0.0       | 0.0       |
| Togo                       | 0                   | 0.0       | 0.0       | 0.0       | 0.0       | 0.0       | 0.0       | 0.0       | 0.0       |
| Tonga                      | 1                   | 0.0       | 0.0       | 0.0       | 0.0       | 53.6      | 0.0       | 0.0       | 7.7       |
| Trinidad and Tobago        | 5                   | 79.2      | 83.4      | 85.5      | 89.5      | 90.7      | 89.6      | 90.1      | 86.9      |
| Tunisia                    | 1                   | 0.0       | 0.0       | 0.0       | 0.0       | 0.0       | 28.9      | 24.8      | 7.7       |
| Turkey                     | 3                   | 16.8      | 19.6      | 20.7      | 24.0      | 59.7      | 70.3      | 83.9      | 42.2      |
| Turkmenistan               | 4                   | 88.4      | 88.1      | 83.0      | 80.9      | 85.1      | 81.0      | 83.4      | 84.3      |
| Uganda                     | 1                   | 0.0       | 0.0       | 0.0       | 0.0       | 0.0       | 2.7       | 0.0       | 0.4       |
| Ukraine                    | 5                   | 87.4      | 90.0      | 83.5      | 86.0      | 86.4      | 90.9      | 92.2      | 88.1      |
| United Arab Emirates       | 1                   | 0.0       | 0.0       | 0.0       | 0.0       | 0.0       | 41.5      | 0.0       | 5.9       |
| United Kingdom             | 5                   | 94.2      | 94.1      | 94.1      | 92.0      | 91.4      | 91.5      | 92.4      | 92.8      |
| USA                        | 5                   | 88.5      | 88.1      | 88.7      | 88.1      | 88.0      | 87.2      | 86.7      | 87.9      |
| Uruguay                    | 4                   | 77.3      | 76.0      | 79.1      | 79.1      | 79.6      | 78.5      | 77.5      | 78.1      |
| Uzbekistan                 | 4                   | 83.1      | 86.3      | 85.0      | 79.0      | 68.3      | 72.2      | 79.8      | 79.1      |
| Vanuatu                    | 0                   | 0.0       | 0.0       | 0.0       | 0.0       | 0.0       | 0.0       | 0.0       | 0.0       |
| Venezuela                  | 5                   | 81.3      | 75.2      | 83.3      | 87.8      | 89.8      | 89.5      | 88.9      | 85.1      |
| Vietnam                    | 1                   | 0.0       | 0.7       | 0.2       | 1.3       | 0.9       | 62.0      | 4.8       | 10.0      |
| Virgin Islands             | 4                   | 82.0      | 0.0       | 90.6      | 90.5      | 84.1      | 81.9      | 74.0      | 71.8      |
| Yemen                      | 0                   | 0.0       | 0.0       | 0.0       | 0.0       | 0.0       | 0.0       | 0.0       | 0.0       |
| Zambia                     | 1                   | 0.0       | 0.0       | 0.0       | 0.0       | 0.0       | 6.3       | 9.5       | 2.3       |
| Zimbabwe                   | 2                   | 0.0       | 0.0       | 45.3      | 74.2      | 0.0       | 45.3      | 0.0       | 23.5      |

**Appendix Table 8. Underlying indicators for percent well-certified for data source with maximum percent well certified in each 5-year time interval for 195 countries, 1980-2017**

| Country             | Time Window | Stars | Percent Well-Certified [PWC] (%) | Max PWC Data Year | Max PWC Data Source                                       | Completeness (%) | Percent Major Garbage (%) | Verbal Autopsy Adjustment (None for VR) (%) |
|---------------------|-------------|-------|----------------------------------|-------------------|-----------------------------------------------------------|------------------|---------------------------|---------------------------------------------|
| Afghanistan         | 1980-1984   | 0     |                                  |                   |                                                           |                  |                           |                                             |
| Afghanistan         | 1985-1989   | 0     |                                  |                   |                                                           |                  |                           |                                             |
| Afghanistan         | 1990-1994   | 0     |                                  |                   |                                                           |                  |                           |                                             |
| Afghanistan         | 1995-1999   | 0     |                                  |                   |                                                           |                  |                           |                                             |
| Afghanistan         | 2000-2004   | 1     | 4.6                              | 2001              | Afghanistan - Badghis Nutrition and Health Survey 2002    |                  | 27.8                      | 6.4                                         |
| Afghanistan         | 2005-2009   | 3     | 38.2                             | 2008              | Afghanistan Special Demographic and Health Survey 2010    |                  | 40.3                      | 64.0                                        |
| Afghanistan         | 2010-2017   | 0     |                                  |                   |                                                           |                  |                           |                                             |
| Albania             | 1980-1984   | 0     |                                  |                   |                                                           |                  |                           |                                             |
| Albania             | 1985-1989   | 4     | 66.1                             | 1989              | Vital Registration                                        | 100.0            | 33.9                      |                                             |
| Albania             | 1990-1994   | 4     | 68.6                             | 1993              | Vital Registration                                        | 100.0            | 31.4                      |                                             |
| Albania             | 1995-1999   | 4     | 70.7                             | 1998              | Vital Registration                                        | 98.3             | 28.1                      |                                             |
| Albania             | 2000-2004   | 4     | 71.8                             | 2000              | Vital Registration                                        | 100.0            | 28.2                      |                                             |
| Albania             | 2005-2009   | 4     | 72.5                             | 2008              | Vital Registration                                        | 100.0            | 27.5                      |                                             |
| Albania             | 2010-2017   | 3     | 54.7                             | 2010              | Vital Registration                                        | 72.2             | 24.2                      |                                             |
| Algeria             | 1980-1984   | 0     |                                  |                   |                                                           |                  |                           |                                             |
| Algeria             | 1985-1989   | 0     |                                  |                   |                                                           |                  |                           |                                             |
| Algeria             | 1990-1994   | 0     |                                  |                   |                                                           |                  |                           |                                             |
| Algeria             | 1995-1999   | 0     |                                  |                   |                                                           |                  |                           |                                             |
| Algeria             | 2000-2004   | 0     |                                  |                   |                                                           |                  |                           |                                             |
| Algeria             | 2005-2009   | 2     | 17.3                             | 2006              | Vital Registration                                        | 30.7             | 43.7                      |                                             |
| Algeria             | 2010-2017   | 0     |                                  |                   |                                                           |                  |                           |                                             |
| American Samoa      | 1980-1984   | 0     |                                  |                   |                                                           |                  |                           |                                             |
| American Samoa      | 1985-1989   | 0     |                                  |                   |                                                           |                  |                           |                                             |
| American Samoa      | 1990-1994   | 0     |                                  |                   |                                                           |                  |                           |                                             |
| American Samoa      | 1995-1999   | 4     | 73.7                             | 1997              | Vital Registration                                        | 94.3             | 21.8                      |                                             |
| American Samoa      | 2000-2004   | 4     | 78.2                             | 2002              | Vital Registration                                        | 96.9             | 19.3                      |                                             |
| American Samoa      | 2005-2009   | 4     | 83.4                             | 2009              | Vital Registration                                        | 100.0            | 16.6                      |                                             |
| American Samoa      | 2010-2017   | 4     | 79.4                             | 2015              | Vital Registration                                        | 93.2             | 14.9                      |                                             |
| Andorra             | 1980-1984   | 0     |                                  |                   |                                                           |                  |                           |                                             |
| Andorra             | 1985-1989   | 0     |                                  |                   |                                                           |                  |                           |                                             |
| Andorra             | 1990-1994   | 0     |                                  |                   |                                                           |                  |                           |                                             |
| Andorra             | 1995-1999   | 0     |                                  |                   |                                                           |                  |                           |                                             |
| Andorra             | 2000-2004   | 0     |                                  |                   |                                                           |                  |                           |                                             |
| Andorra             | 2005-2009   | 0     |                                  |                   |                                                           |                  |                           |                                             |
| Andorra             | 2010-2017   | 0     |                                  |                   |                                                           |                  |                           |                                             |
| Angola              | 1980-1984   | 0     |                                  |                   |                                                           |                  |                           |                                             |
| Angola              | 1985-1989   | 0     |                                  |                   |                                                           |                  |                           |                                             |
| Angola              | 1990-1994   | 0     |                                  |                   |                                                           |                  |                           |                                             |
| Angola              | 1995-1999   | 0     |                                  |                   |                                                           |                  |                           |                                             |
| Angola              | 2000-2004   | 0     |                                  |                   |                                                           |                  |                           |                                             |
| Angola              | 2005-2009   | 0     |                                  |                   |                                                           |                  |                           |                                             |
| Angola              | 2010-2017   | 1     | 4.4                              | 2010              | Angola - Dande Health and Demographic Surveillance System |                  | 30.9                      | 6.4                                         |
| Antigua and Barbuda | 1980-1984   | 3     | 60.9                             | 1983              | Vital Registration                                        | 91.2             | 33.3                      |                                             |
| Antigua and Barbuda | 1985-1989   | 4     | 72.0                             | 1989              | Vital Registration                                        | 100.0            | 28.0                      |                                             |
| Antigua and Barbuda | 1990-1994   | 4     | 75.1                             | 1991              | Vital Registration                                        | 100.0            | 24.9                      |                                             |
| Antigua and Barbuda | 1995-1999   | 4     | 79.5                             | 1996              | Vital Registration                                        | 100.0            | 20.5                      |                                             |
| Antigua and Barbuda | 2000-2004   | 4     | 79.3                             | 2004              | Vital Registration                                        | 100.0            | 20.7                      |                                             |
| Antigua and Barbuda | 2005-2009   | 4     | 80.0                             | 2007              | Vital Registration                                        | 100.0            | 20.0                      |                                             |
| Antigua and Barbuda | 2010-2017   | 4     | 74.7                             | 2014              | Vital Registration                                        | 100.0            | 25.3                      |                                             |
| Argentina           | 1980-1984   | 4     | 77.4                             | 1981              | Vital Registration                                        | 99.9             | 22.5                      |                                             |
| Argentina           | 1985-1989   | 4     | 70.9                             | 1987              | Vital Registration                                        | 100.0            | 29.1                      |                                             |
| Argentina           | 1990-1994   | 4     | 69.7                             | 1990              | Vital Registration                                        | 100.0            | 30.3                      |                                             |
| Argentina           | 1995-1999   | 4     | 68.5                             | 1996              | Vital Registration                                        | 100.0            | 31.5                      |                                             |
| Argentina           | 2000-2004   | 4     | 66.7                             | 2000              | Vital Registration                                        | 99.9             | 33.3                      |                                             |
| Argentina           | 2005-2009   | 4     | 66.6                             | 2005              | Vital Registration                                        | 100.0            | 33.4                      |                                             |
| Argentina           | 2010-2017   | 4     | 69.9                             | 2015              | Vital Registration                                        | 98.9             | 29.3                      |                                             |
| Armenia             | 1980-1984   | 4     | 74.2                             | 1982              | Vital Registration                                        | 85.7             | 13.5                      |                                             |
| Armenia             | 1985-1989   | 4     | 78.1                             | 1989              | Vital Registration                                        | 90.7             | 13.9                      |                                             |
| Armenia             | 1990-1994   | 4     | 85.0                             | 1992              | Vital Registration                                        | 97.8             | 13.2                      |                                             |
| Armenia             | 1995-1999   | 5     | 88.8                             | 1999              | Vital Registration                                        | 100.0            | 11.2                      |                                             |
| Armenia             | 2000-2004   | 5     | 88.9                             | 2000              | Vital Registration                                        | 99.8             | 10.9                      |                                             |
| Armenia             | 2005-2009   | 5     | 92.7                             | 2008              | Vital Registration                                        | 99.8             | 7.1                       |                                             |
| Armenia             | 2010-2017   | 5     | 91.9                             | 2010              | Vital Registration                                        | 100.0            | 8.1                       |                                             |
| Australia           | 1980-1984   | 5     | 93.2                             | 1982              | Vital Registration                                        | 100.0            | 6.8                       |                                             |
| Australia           | 1985-1989   | 5     | 93.6                             | 1987              | Vital Registration                                        | 100.0            | 6.4                       |                                             |
| Australia           | 1990-1994   | 5     | 92.9                             | 1990              | Vital Registration                                        | 100.0            | 7.1                       |                                             |
| Australia           | 1995-1999   | 5     | 92.5                             | 1996              | Vital Registration                                        | 100.0            | 7.5                       |                                             |
| Australia           | 2000-2004   | 5     | 91.1                             | 2002              | Vital Registration                                        | 100.0            | 8.9                       |                                             |
| Australia           | 2005-2009   | 5     | 90.5                             | 2008              | Vital Registration                                        | 100.0            | 9.5                       |                                             |
| Australia           | 2010-2017   | 5     | 90.0                             | 2011              | Vital Registration                                        | 99.8             | 9.8                       |                                             |
| Austria             | 1980-1984   | 5     | 89.9                             | 1980              | Vital Registration                                        | 100.0            | 10.1                      |                                             |
| Austria             | 1985-1989   | 5     | 90.9                             | 1987              | Vital Registration                                        | 100.0            | 9.1                       |                                             |
| Austria             | 1990-1994   | 5     | 90.0                             | 1990              | Vital Registration                                        | 100.0            | 10.0                      |                                             |
| Austria             | 1995-1999   | 5     | 88.6                             | 1996              | Vital Registration                                        | 99.9             | 11.2                      |                                             |



Appendix Table 8. Underlying indicators for percent well-certified for data source with maximum percent well certified in each 5-year time interval for 195 countries, 1980-2017

| Country    | Time Window | Stars | Percent Well-Certified [PWC] (%) | Max PWC Data Year | Max PWC Data Source                                                                            | Completeness (%) | Percent Major Garbage (%) | Verbal Autopsy Adjustment (None for VR) (%) |
|------------|-------------|-------|----------------------------------|-------------------|------------------------------------------------------------------------------------------------|------------------|---------------------------|---------------------------------------------|
| Austria    | 2000-2004   | 5     | 91.9                             | 2003              | Vital Registration                                                                             | 100.0            | 8.1                       |                                             |
| Austria    | 2005-2009   | 5     | 90.8                             | 2008              | Vital Registration                                                                             | 100.0            | 9.2                       |                                             |
| Austria    | 2010-2017   | 5     | 89.2                             | 2013              | Vital Registration                                                                             | 100.0            | 10.8                      |                                             |
| Azerbaijan | 1980-1984   | 4     | 75.5                             | 1981              | Vital Registration                                                                             | 87.4             | 13.6                      |                                             |
| Azerbaijan | 1985-1989   | 4     | 75.4                             | 1988              | Vital Registration                                                                             | 86.6             | 12.9                      |                                             |
| Azerbaijan | 1990-1994   | 4     | 78.1                             | 1993              | Vital Registration                                                                             | 88.4             | 11.6                      |                                             |
| Azerbaijan | 1995-1999   | 4     | 72.0                             | 1995              | Vital Registration                                                                             | 84.1             | 14.4                      |                                             |
| Azerbaijan | 2000-2004   | 4     | 68.2                             | 2003              | Vital Registration                                                                             | 73.7             | 7.5                       |                                             |
| Azerbaijan | 2005-2009   | 3     | 41.8                             | 2007              | Vital Registration                                                                             | 73.1             | 42.9                      |                                             |
| Azerbaijan | 2010-2017   | 0     |                                  |                   |                                                                                                |                  |                           |                                             |
| Bahrain    | 1980-1984   | 0     |                                  |                   |                                                                                                |                  |                           |                                             |
| Bahrain    | 1985-1989   | 4     | 78.1                             | 1986              | Vital Registration                                                                             | 100.0            | 21.9                      |                                             |
| Bahrain    | 1990-1994   | 0     |                                  |                   |                                                                                                |                  |                           |                                             |
| Bahrain    | 1995-1999   | 3     | 61.6                             | 1997              | Vital Registration                                                                             | 90.7             | 32.1                      |                                             |
| Bahrain    | 2000-2004   | 3     | 64.6                             | 2000              | Vital Registration                                                                             | 99.0             | 34.8                      |                                             |
| Bahrain    | 2005-2009   | 3     | 55.9                             | 2005              | Vital Registration                                                                             | 91.8             | 39.1                      |                                             |
| Bahrain    | 2010-2017   | 3     | 56.8                             | 2014              | Vital Registration                                                                             | 88.9             | 36.2                      |                                             |
| Bangladesh | 1980-1984   | 1     | 2.8                              | 1984              | Bangladesh - Matlab Health and Demographic Surveillance System                                 |                  | 55.5                      | 6.4                                         |
| Bangladesh | 1985-1989   | 1     | 4.5                              | 1989              | Bangladesh - Matlab Health and Demographic Surveillance System                                 |                  | 29.3                      | 6.4                                         |
| Bangladesh | 1990-1994   | 2     | 25.7                             | 1991              | Causes of childhood deaths in Bangladesh: an update                                            |                  | 16.7                      | 30.8                                        |
| Bangladesh | 1995-1999   | 1     | 4.4                              | 1998              | Bangladesh - Matlab Health and Demographic Surveillance System                                 |                  | 31.9                      | 6.4                                         |
| Bangladesh | 2000-2004   | 2     | 12.4                             | 2004              | Bangladesh Demographic and Health Survey 2004                                                  |                  | 40.9                      | 20.9                                        |
| Bangladesh | 2005-2009   | 1     | 6.3                              | 2006              | Bangladesh - Matlab Health and Demographic Surveillance System                                 |                  | 2.2                       | 6.4                                         |
| Bangladesh | 2010-2017   | 1     | 6.3                              | 2010              | Bangladesh - Matlab Health and Demographic Surveillance System                                 |                  | 1.6                       | 6.4                                         |
| Barbados   | 1980-1984   | 4     | 75.0                             | 1980              | Vital Registration                                                                             | 100.0            | 25.0                      |                                             |
| Barbados   | 1985-1989   | 4     | 75.8                             | 1987              | Vital Registration                                                                             | 100.0            | 24.2                      |                                             |
| Barbados   | 1990-1994   | 4     | 77.6                             | 1992              | Vital Registration                                                                             | 100.0            | 22.4                      |                                             |
| Barbados   | 1995-1999   | 4     | 77.4                             | 1995              | Vital Registration                                                                             | 100.0            | 22.6                      |                                             |
| Barbados   | 2000-2004   | 4     | 75.6                             | 2000              | Vital Registration                                                                             | 100.0            | 24.4                      |                                             |
| Barbados   | 2005-2009   | 4     | 82.1                             | 2007              | Vital Registration                                                                             | 100.0            | 17.9                      |                                             |
| Barbados   | 2010-2017   | 4     | 82.0                             | 2011              | Vital Registration                                                                             | 100.0            | 18.0                      |                                             |
| Belarus    | 1980-1984   | 4     | 84.0                             | 1982              | Vital Registration                                                                             | 97.6             | 13.9                      |                                             |
| Belarus    | 1985-1989   | 5     | 88.9                             | 1987              | Vital Registration                                                                             | 100.0            | 11.1                      |                                             |
| Belarus    | 1990-1994   | 4     | 80.1                             | 1990              | Vital Registration                                                                             | 100.0            | 19.9                      |                                             |
| Belarus    | 1995-1999   | 4     | 82.9                             | 1999              | Vital Registration                                                                             | 100.0            | 17.1                      |                                             |
| Belarus    | 2000-2004   | 5     | 85.4                             | 2002              | Vital Registration                                                                             | 100.0            | 14.6                      |                                             |
| Belarus    | 2005-2009   | 4     | 84.5                             | 2007              | Vital Registration                                                                             | 100.0            | 15.5                      |                                             |
| Belarus    | 2010-2017   | 4     | 85.0                             | 2010              | Vital Registration                                                                             | 100.0            | 15.0                      |                                             |
| Belgium    | 1980-1984   | 4     | 77.8                             | 1981              | Vital Registration                                                                             | 100.0            | 22.2                      |                                             |
| Belgium    | 1985-1989   | 4     | 77.6                             | 1987              | Vital Registration                                                                             | 100.0            | 22.4                      |                                             |
| Belgium    | 1990-1994   | 4     | 81.3                             | 1993              | Vital Registration                                                                             | 100.0            | 18.7                      |                                             |
| Belgium    | 1995-1999   | 4     | 84.1                             | 1998              | Vital Registration                                                                             | 100.0            | 15.9                      |                                             |
| Belgium    | 2000-2004   | 4     | 82.8                             | 2000              | Vital Registration                                                                             | 99.5             | 16.8                      |                                             |
| Belgium    | 2005-2009   | 4     | 82.7                             | 2008              | Vital Registration                                                                             | 99.7             | 17.0                      |                                             |
| Belgium    | 2010-2017   | 4     | 80.4                             | 2010              | Vital Registration                                                                             | 100.0            | 19.6                      |                                             |
| Belize     | 1980-1984   | 3     | 47.5                             | 1984              | Vital Registration                                                                             | 69.5             | 31.7                      |                                             |
| Belize     | 1985-1989   | 3     | 52.4                             | 1987              | Vital Registration                                                                             | 68.2             | 23.2                      |                                             |
| Belize     | 1990-1994   | 3     | 49.8                             | 1993              | Vital Registration                                                                             | 76.1             | 34.6                      |                                             |
| Belize     | 1995-1999   | 4     | 76.6                             | 1998              | Vital Registration                                                                             | 100.0            | 23.4                      |                                             |
| Belize     | 2000-2004   | 4     | 78.3                             | 2002              | Vital Registration                                                                             | 100.0            | 21.7                      |                                             |
| Belize     | 2005-2009   | 5     | 87.1                             | 2009              | Vital Registration                                                                             | 100.0            | 12.9                      |                                             |
| Belize     | 2010-2017   | 5     | 89.1                             | 2011              | Vital Registration                                                                             | 100.0            | 10.9                      |                                             |
| Benin      | 1980-1984   | 0     |                                  |                   |                                                                                                |                  |                           |                                             |
| Benin      | 1985-1989   | 1     | 0.6                              | 1989              | Incidence de décès de 0 à 1 an dans une cohorte de 802 enfants en milieu rural au sud du Bénin |                  | 72.0                      | 2.0                                         |
| Benin      | 1990-1994   | 0     |                                  |                   |                                                                                                |                  |                           |                                             |
| Benin      | 1995-1999   | 0     |                                  |                   |                                                                                                |                  |                           |                                             |
| Benin      | 2000-2004   | 0     |                                  |                   |                                                                                                |                  |                           |                                             |
| Benin      | 2005-2009   | 0     |                                  |                   |                                                                                                |                  |                           |                                             |
| Benin      | 2010-2017   | 0     |                                  |                   |                                                                                                |                  |                           |                                             |
| Bermuda    | 1980-1984   | 5     | 90.4                             | 1984              | Vital Registration                                                                             | 100.0            | 9.6                       |                                             |
| Bermuda    | 1985-1989   | 5     | 88.7                             | 1985              | Vital Registration                                                                             | 100.0            | 11.3                      |                                             |
| Bermuda    | 1990-1994   | 5     | 90.2                             | 1991              | Vital Registration                                                                             | 100.0            | 9.8                       |                                             |
| Bermuda    | 1995-1999   | 5     | 93.5                             | 1996              | Vital Registration                                                                             | 100.0            | 6.5                       |                                             |
| Bermuda    | 2000-2004   | 5     | 91.1                             | 2002              | Vital Registration                                                                             | 100.0            | 8.9                       |                                             |
| Bermuda    | 2005-2009   | 5     | 86.4                             | 2005              | Vital Registration                                                                             | 100.0            | 13.6                      |                                             |
| Bermuda    | 2010-2017   | 5     | 90.3                             | 2014              | Vital Registration                                                                             | 100.0            | 9.7                       |                                             |
| Bhutan     | 1980-1984   | 0     |                                  |                   |                                                                                                |                  |                           |                                             |
| Bhutan     | 1985-1989   | 0     |                                  |                   |                                                                                                |                  |                           |                                             |
| Bhutan     | 1990-1994   | 0     |                                  |                   |                                                                                                |                  |                           |                                             |
| Bhutan     | 1995-1999   | 0     |                                  |                   |                                                                                                |                  |                           |                                             |
| Bhutan     | 2000-2004   | 0     |                                  |                   |                                                                                                |                  |                           |                                             |
| Bhutan     | 2005-2009   | 0     |                                  |                   |                                                                                                |                  |                           |                                             |

**Appendix Table 8. Underlying indicators for percent well-certified for data source with maximum percent well certified in each 5-year time interval for 195 countries, 1980-2017**

| Country                | Time Window | Stars | Percent Well-Certified [PWC] (%) | Max PWC Data Year | Max PWC Data Source                                                                                                                                                                | Completeness (%) | Percent Major Garbage (%) | Verbal Autopsy Adjustment (None for VR) (%) |
|------------------------|-------------|-------|----------------------------------|-------------------|------------------------------------------------------------------------------------------------------------------------------------------------------------------------------------|------------------|---------------------------|---------------------------------------------|
| Bhutan                 | 2010-2017   | 0     |                                  |                   |                                                                                                                                                                                    |                  |                           |                                             |
| Bolivia                | 1980-1984   | 0     |                                  |                   |                                                                                                                                                                                    |                  |                           |                                             |
| Bolivia                | 1985-1989   | 0     |                                  |                   |                                                                                                                                                                                    |                  |                           |                                             |
| Bolivia                | 1990-1994   | 0     |                                  |                   |                                                                                                                                                                                    |                  |                           |                                             |
| Bolivia                | 1995-1999   | 0     |                                  |                   |                                                                                                                                                                                    |                  |                           |                                             |
| Bolivia                | 2000-2004   | 2     | 14.7                             | 2003              | Vital Registration                                                                                                                                                                 | 46.5             | 68.5                      |                                             |
| Bolivia                | 2005-2009   | 0     |                                  |                   |                                                                                                                                                                                    |                  |                           |                                             |
| Bolivia                | 2010-2017   | 0     |                                  |                   |                                                                                                                                                                                    |                  |                           |                                             |
| Bosnia and Herzegovina | 1980-1984   | 0     |                                  |                   |                                                                                                                                                                                    |                  |                           |                                             |
| Bosnia and Herzegovina | 1985-1989   | 4     | 65.8                             | 1988              | Vital Registration                                                                                                                                                                 | 98.6             | 33.3                      |                                             |
| Bosnia and Herzegovina | 1990-1994   | 4     | 67.1                             | 1990              | Vital Registration                                                                                                                                                                 | 99.9             | 32.8                      |                                             |
| Bosnia and Herzegovina | 1995-1999   | 0     |                                  |                   |                                                                                                                                                                                    |                  |                           |                                             |
| Bosnia and Herzegovina | 2000-2004   | 0     |                                  |                   |                                                                                                                                                                                    |                  |                           |                                             |
| Bosnia and Herzegovina | 2005-2009   | 0     |                                  |                   |                                                                                                                                                                                    |                  |                           |                                             |
| Bosnia and Herzegovina | 2010-2017   | 4     | 71.4                             | 2014              | Vital Registration                                                                                                                                                                 | 99.1             | 28.0                      |                                             |
| Botswana               | 1980-1984   | 0     |                                  |                   |                                                                                                                                                                                    |                  |                           |                                             |
| Botswana               | 1985-1989   | 0     |                                  |                   |                                                                                                                                                                                    |                  |                           |                                             |
| Botswana               | 1990-1994   | 0     |                                  |                   |                                                                                                                                                                                    |                  |                           |                                             |
| Botswana               | 1995-1999   | 0     |                                  |                   |                                                                                                                                                                                    |                  |                           |                                             |
| Botswana               | 2000-2004   | 0     |                                  |                   |                                                                                                                                                                                    |                  |                           |                                             |
| Botswana               | 2005-2009   | 0     |                                  |                   |                                                                                                                                                                                    |                  |                           |                                             |
| Botswana               | 2010-2017   | 0     |                                  |                   |                                                                                                                                                                                    |                  |                           |                                             |
| Brazil                 | 1980-1984   | 3     | 54.0                             | 1984              | Vital Registration                                                                                                                                                                 | 84.2             | 35.8                      |                                             |
| Brazil                 | 1985-1989   | 3     | 58.9                             | 1989              | Vital Registration                                                                                                                                                                 | 86.9             | 32.3                      |                                             |
| Brazil                 | 1990-1994   | 4     | 65.2                             | 1994              | Vital Registration                                                                                                                                                                 | 93.8             | 30.5                      |                                             |
| Brazil                 | 1995-1999   | 4     | 68.9                             | 1999              | Vital Registration                                                                                                                                                                 | 95.5             | 27.8                      |                                             |
| Brazil                 | 2000-2004   | 4     | 74.6                             | 2004              | Vital Registration                                                                                                                                                                 | 98.5             | 24.3                      |                                             |
| Brazil                 | 2005-2009   | 4     | 80.7                             | 2009              | Vital Registration                                                                                                                                                                 | 99.6             | 19.0                      |                                             |
| Brazil                 | 2010-2017   | 4     | 82.5                             | 2014              | Vital Registration                                                                                                                                                                 | 100.0            | 17.5                      |                                             |
| Brunei                 | 1980-1984   | 0     |                                  |                   |                                                                                                                                                                                    |                  |                           |                                             |
| Brunei                 | 1985-1989   | 0     |                                  |                   |                                                                                                                                                                                    |                  |                           |                                             |
| Brunei                 | 1990-1994   | 0     |                                  |                   |                                                                                                                                                                                    |                  |                           |                                             |
| Brunei                 | 1995-1999   | 4     | 66.7                             | 1998              | Vital Registration                                                                                                                                                                 | 77.8             | 14.2                      |                                             |
| Brunei                 | 2000-2004   | 4     | 73.2                             | 2002              | Vital Registration                                                                                                                                                                 | 88.4             | 17.2                      |                                             |
| Brunei                 | 2005-2009   | 4     | 76.1                             | 2007              | Vital Registration                                                                                                                                                                 | 93.0             | 18.1                      |                                             |
| Brunei                 | 2010-2017   | 4     | 74.5                             | 2015              | Vital Registration                                                                                                                                                                 | 87.9             | 15.3                      |                                             |
| Bulgaria               | 1980-1984   | 4     | 81.7                             | 1984              | Vital Registration                                                                                                                                                                 | 100.0            | 18.3                      |                                             |
| Bulgaria               | 1985-1989   | 4     | 82.3                             | 1986              | Vital Registration                                                                                                                                                                 | 100.0            | 17.7                      |                                             |
| Bulgaria               | 1990-1994   | 4     | 79.6                             | 1991              | Vital Registration                                                                                                                                                                 | 100.0            | 20.4                      |                                             |
| Bulgaria               | 1995-1999   | 4     | 76.5                             | 1995              | Vital Registration                                                                                                                                                                 | 99.8             | 23.3                      |                                             |
| Bulgaria               | 2000-2004   | 4     | 71.8                             | 2002              | Vital Registration                                                                                                                                                                 | 100.0            | 28.2                      |                                             |
| Bulgaria               | 2005-2009   | 4     | 73.5                             | 2005              | Vital Registration                                                                                                                                                                 | 100.0            | 26.5                      |                                             |
| Bulgaria               | 2010-2017   | 4     | 70.2                             | 2012              | Vital Registration                                                                                                                                                                 | 100.0            | 29.8                      |                                             |
| Burkina Faso           | 1980-1984   | 1     | 0.2                              | 1984              | The burden of malaria mortality among African children in the year 2000                                                                                                            |                  | 95.3                      | 3.8                                         |
| Burkina Faso           | 1985-1989   | 0     |                                  |                   |                                                                                                                                                                                    |                  |                           |                                             |
| Burkina Faso           | 1990-1994   | 0     |                                  |                   |                                                                                                                                                                                    |                  |                           |                                             |
| Burkina Faso           | 1995-1999   | 1     | 4.6                              | 1998              | Measuring the local burden of disease. A study of years of life lost in sub-Saharan Africa                                                                                         |                  | 27.4                      | 6.4                                         |
| Burkina Faso           | 2000-2004   | 1     | 6.3                              | 2000              | Burkina Faso - Nouna Health and Demographic Surveillance System                                                                                                                    |                  | 1.0                       | 6.4                                         |
| Burkina Faso           | 2005-2009   | 1     | 4.6                              | 2009              | An improved method for physician-certified verbal autopsy reduces the rate of discrepancy: experiences in the Nouna Health and Demographic Surveillance Site (NHDSS), Burkina Faso |                  | 28.8                      | 6.4                                         |
| Burkina Faso           | 2010-2017   | 1     | 0.3                              | 2010              | Africa, Asia, Oceania - INDEPTH Network Cause-Specific Mortality - Release 2014                                                                                                    |                  | 95.4                      | 6.4                                         |
| Burundi                | 1980-1984   | 0     |                                  |                   |                                                                                                                                                                                    |                  |                           |                                             |
| Burundi                | 1985-1989   | 0     |                                  |                   |                                                                                                                                                                                    |                  |                           |                                             |
| Burundi                | 1990-1994   | 1     | 2.2                              | 1990              | Mortality and morbidity at young ages in a stable hyperendemic malaria region, community Nyanza-Lac, Imbo South, Burundi                                                           |                  | 23.1                      | 2.8                                         |
| Burundi                | 1995-1999   | 0     |                                  |                   |                                                                                                                                                                                    |                  |                           |                                             |
| Burundi                | 2000-2004   | 0     |                                  |                   |                                                                                                                                                                                    |                  |                           |                                             |
| Burundi                | 2005-2009   | 0     |                                  |                   |                                                                                                                                                                                    |                  |                           |                                             |
| Burundi                | 2010-2017   | 0     |                                  |                   |                                                                                                                                                                                    |                  |                           |                                             |
| Cambodia               | 1980-1984   | 0     |                                  |                   |                                                                                                                                                                                    |                  |                           |                                             |
| Cambodia               | 1985-1989   | 0     |                                  |                   |                                                                                                                                                                                    |                  |                           |                                             |
| Cambodia               | 1990-1994   | 0     |                                  |                   |                                                                                                                                                                                    |                  |                           |                                             |
| Cambodia               | 1995-1999   | 0     |                                  |                   |                                                                                                                                                                                    |                  |                           |                                             |
| Cambodia               | 2000-2004   | 1     | 1.6                              | 2001              | Community-based surveillance: a pilot study from rural Cambodia                                                                                                                    |                  | 74.8                      | 6.4                                         |
| Cambodia               | 2005-2009   | 1     | 4.4                              | 2009              | Mortality in Cambodia An 18-Month Prospective Community-based Surveillance of All-age Deaths Using Verbal Autopsies                                                                |                  | 31.4                      | 6.4                                         |
| Cambodia               | 2010-2017   | 0     |                                  |                   |                                                                                                                                                                                    |                  |                           |                                             |
| Cameroon               | 1980-1984   | 0     |                                  |                   |                                                                                                                                                                                    |                  |                           |                                             |
| Cameroon               | 1985-1989   | 0     |                                  |                   |                                                                                                                                                                                    |                  |                           |                                             |
| Cameroon               | 1990-1994   | 0     |                                  |                   |                                                                                                                                                                                    |                  |                           |                                             |
| Cameroon               | 1995-1999   | 0     |                                  |                   |                                                                                                                                                                                    |                  |                           |                                             |
| Cameroon               | 2000-2004   | 0     |                                  |                   |                                                                                                                                                                                    |                  |                           |                                             |
| Cameroon               | 2005-2009   | 0     |                                  |                   |                                                                                                                                                                                    |                  |                           |                                             |

**Appendix Table 8. Underlying indicators for percent well-certified for data source with maximum percent well certified in each 5-year time interval for 195 countries, 1980-2017**

| Country                  | Time Window | Stars | Percent Well-Certified [PWC] (%) | Max PWC Data Year | Max PWC Data Source                                                               | Completeness (%) | Percent Major Garbage (%) | Verbal Autopsy Adjustment (None for VR) (%) |
|--------------------------|-------------|-------|----------------------------------|-------------------|-----------------------------------------------------------------------------------|------------------|---------------------------|---------------------------------------------|
| Cameroon                 | 2010-2017   | 0     |                                  |                   |                                                                                   |                  |                           |                                             |
| Canada                   | 1980-1984   | 5     | 89.4                             | 1984              | Vital Registration                                                                | 100.0            | 10.6                      |                                             |
| Canada                   | 1985-1989   | 5     | 90.0                             | 1986              | Vital Registration                                                                | 100.0            | 10.0                      |                                             |
| Canada                   | 1990-1994   | 5     | 89.1                             | 1993              | Vital Registration                                                                | 100.0            | 10.9                      |                                             |
| Canada                   | 1995-1999   | 5     | 88.6                             | 1995              | Vital Registration                                                                | 100.0            | 11.4                      |                                             |
| Canada                   | 2000-2004   | 5     | 89.3                             | 2002              | Vital Registration                                                                | 100.0            | 10.7                      |                                             |
| Canada                   | 2005-2009   | 5     | 89.4                             | 2007              | Vital Registration                                                                | 99.5             | 10.2                      |                                             |
| Canada                   | 2010-2017   | 5     | 90.1                             | 2013              | Vital Registration                                                                | 99.4             | 9.4                       |                                             |
| Cape Verde               | 1980-1984   | 3     | 56.1                             | 1980              | Vital Registration                                                                | 95.5             | 41.2                      |                                             |
| Cape Verde               | 1985-1989   | 0     |                                  |                   |                                                                                   |                  |                           |                                             |
| Cape Verde               | 1990-1994   | 1     | 0.1                              | 1992              | Deaths among women of reproductive age in Cape Verde: cause and avoidability      |                  | 49.5                      | 0.2                                         |
| Cape Verde               | 1995-1999   | 0     |                                  |                   |                                                                                   |                  |                           |                                             |
| Cape Verde               | 2000-2004   | 0     |                                  |                   |                                                                                   |                  |                           |                                             |
| Cape Verde               | 2005-2009   | 0     |                                  |                   |                                                                                   |                  |                           |                                             |
| Cape Verde               | 2010-2017   | 4     | 67.7                             | 2012              | Vital Registration                                                                | 95.9             | 29.3                      |                                             |
| Central African Republic | 1980-1984   | 0     |                                  |                   |                                                                                   |                  |                           |                                             |
| Central African Republic | 1985-1989   | 0     |                                  |                   |                                                                                   |                  |                           |                                             |
| Central African Republic | 1990-1994   | 0     |                                  |                   |                                                                                   |                  |                           |                                             |
| Central African Republic | 1995-1999   | 0     |                                  |                   |                                                                                   |                  |                           |                                             |
| Central African Republic | 2000-2004   | 0     |                                  |                   |                                                                                   |                  |                           |                                             |
| Central African Republic | 2005-2009   | 0     |                                  |                   |                                                                                   |                  |                           |                                             |
| Central African Republic | 2010-2017   | 0     |                                  |                   |                                                                                   |                  |                           |                                             |
| Chad                     | 1980-1984   | 0     |                                  |                   |                                                                                   |                  |                           |                                             |
| Chad                     | 1985-1989   | 0     |                                  |                   |                                                                                   |                  |                           |                                             |
| Chad                     | 1990-1994   | 0     |                                  |                   |                                                                                   |                  |                           |                                             |
| Chad                     | 1995-1999   | 0     |                                  |                   |                                                                                   |                  |                           |                                             |
| Chad                     | 2000-2004   | 0     |                                  |                   |                                                                                   |                  |                           |                                             |
| Chad                     | 2005-2009   | 0     |                                  |                   |                                                                                   |                  |                           |                                             |
| Chad                     | 2010-2017   | 0     |                                  |                   |                                                                                   |                  |                           |                                             |
| Chile                    | 1980-1984   | 4     | 75.7                             | 1983              | Vital Registration                                                                | 100.0            | 24.3                      |                                             |
| Chile                    | 1985-1989   | 4     | 75.5                             | 1988              | Vital Registration                                                                | 100.0            | 24.5                      |                                             |
| Chile                    | 1990-1994   | 4     | 81.7                             | 1994              | Vital Registration                                                                | 98.8             | 17.3                      |                                             |
| Chile                    | 1995-1999   | 4     | 84.7                             | 1999              | Vital Registration                                                                | 100.0            | 15.3                      |                                             |
| Chile                    | 2000-2004   | 5     | 90.8                             | 2003              | Vital Registration                                                                | 99.8             | 9.1                       |                                             |
| Chile                    | 2005-2009   | 5     | 90.8                             | 2005              | Vital Registration                                                                | 100.0            | 9.2                       |                                             |
| Chile                    | 2010-2017   | 5     | 89.8                             | 2012              | Vital Registration                                                                | 100.0            | 10.2                      |                                             |
| China                    | 1980-1984   | 0     |                                  |                   |                                                                                   |                  |                           |                                             |
| China                    | 1985-1989   | 1     | 0.9                              | 1986              | Infant mortality among various nationalities in the middle part of Guizhou, China |                  | 17.9                      | 1.0                                         |
| China                    | 1990-1994   | 4     | 73.8                             | 1994              | Vital Registration - Sample                                                       | 85.3             | 13.4                      |                                             |
| China                    | 1995-1999   | 4     | 75.1                             | 1998              | Vital Registration - Sample                                                       | 87.4             | 14.0                      |                                             |
| China                    | 2000-2004   | 4     | 70.3                             | 2004              | Vital Registration                                                                | 74.2             | 5.3                       |                                             |
| China                    | 2005-2009   | 4     | 73.0                             | 2009              | Vital Registration - Sample                                                       | 77.7             | 6.0                       |                                             |
| China                    | 2010-2017   | 4     | 73.5                             | 2012              | Vital Registration - Sample                                                       | 77.6             | 5.4                       |                                             |
| Colombia                 | 1980-1984   | 4     | 72.4                             | 1983              | Vital Registration                                                                | 92.1             | 21.4                      |                                             |
| Colombia                 | 1985-1989   | 4     | 74.4                             | 1985              | Vital Registration                                                                | 94.2             | 21.0                      |                                             |
| Colombia                 | 1990-1994   | 4     | 77.3                             | 1994              | Vital Registration                                                                | 92.0             | 16.0                      |                                             |
| Colombia                 | 1995-1999   | 5     | 88.0                             | 1999              | Vital Registration                                                                | 98.6             | 10.8                      |                                             |
| Colombia                 | 2000-2004   | 5     | 88.6                             | 2001              | Vital Registration                                                                | 98.7             | 10.2                      |                                             |
| Colombia                 | 2005-2009   | 5     | 88.9                             | 2008              | Vital Registration                                                                | 99.6             | 10.7                      |                                             |
| Colombia                 | 2010-2017   | 5     | 88.5                             | 2013              | Vital Registration                                                                | 98.5             | 10.1                      |                                             |
| Comoros                  | 1980-1984   | 0     |                                  |                   |                                                                                   |                  |                           |                                             |
| Comoros                  | 1985-1989   | 0     |                                  |                   |                                                                                   |                  |                           |                                             |
| Comoros                  | 1990-1994   | 0     |                                  |                   |                                                                                   |                  |                           |                                             |
| Comoros                  | 1995-1999   | 0     |                                  |                   |                                                                                   |                  |                           |                                             |
| Comoros                  | 2000-2004   | 0     |                                  |                   |                                                                                   |                  |                           |                                             |
| Comoros                  | 2005-2009   | 0     |                                  |                   |                                                                                   |                  |                           |                                             |
| Comoros                  | 2010-2017   | 0     |                                  |                   |                                                                                   |                  |                           |                                             |
| Congo (Brazzaville)      | 1980-1984   | 0     |                                  |                   |                                                                                   |                  |                           |                                             |
| Congo (Brazzaville)      | 1985-1989   | 0     |                                  |                   |                                                                                   |                  |                           |                                             |
| Congo (Brazzaville)      | 1990-1994   | 0     |                                  |                   |                                                                                   |                  |                           |                                             |
| Congo (Brazzaville)      | 1995-1999   | 0     |                                  |                   |                                                                                   |                  |                           |                                             |
| Congo (Brazzaville)      | 2000-2004   | 0     |                                  |                   |                                                                                   |                  |                           |                                             |
| Congo (Brazzaville)      | 2005-2009   | 0     |                                  |                   |                                                                                   |                  |                           |                                             |
| Congo (Brazzaville)      | 2010-2017   | 0     |                                  |                   |                                                                                   |                  |                           |                                             |
| Costa Rica               | 1980-1984   | 4     | 81.6                             | 1983              | Vital Registration                                                                | 100.0            | 18.4                      |                                             |
| Costa Rica               | 1985-1989   | 4     | 83.4                             | 1987              | Vital Registration                                                                | 100.0            | 16.6                      |                                             |
| Costa Rica               | 1990-1994   | 4     | 82.5                             | 1993              | Vital Registration                                                                | 100.0            | 17.5                      |                                             |
| Costa Rica               | 1995-1999   | 5     | 91.1                             | 1999              | Vital Registration                                                                | 100.0            | 8.9                       |                                             |
| Costa Rica               | 2000-2004   | 5     | 92.3                             | 2003              | Vital Registration                                                                | 100.0            | 7.7                       |                                             |
| Costa Rica               | 2005-2009   | 5     | 90.6                             | 2005              | Vital Registration                                                                | 99.5             | 9.0                       |                                             |
| Costa Rica               | 2010-2017   | 5     | 90.5                             | 2014              | Vital Registration                                                                | 100.0            | 9.5                       |                                             |
| Cote d'Ivoire            | 1980-1984   | 0     |                                  |                   |                                                                                   |                  |                           |                                             |

**Appendix Table 8. Underlying indicators for percent well-certified for data source with maximum percent well certified in each 5-year time interval for 195 countries, 1980-2017**

| Country            | Time Window | Stars | Percent Well-Certified [PWC] (%) | Max PWC Data Year | Max PWC Data Source                                                                                                                                        | Completeness (%) | Percent Major Garbage (%) | Verbal Autopsy Adjustment (None for VR) (%) |
|--------------------|-------------|-------|----------------------------------|-------------------|------------------------------------------------------------------------------------------------------------------------------------------------------------|------------------|---------------------------|---------------------------------------------|
| Cote d'Ivoire      | 1985-1989   | 1     | 1.2                              | 1988              | Effet de l'observance des d'approvisionnement en eau et de la therapie par voie orale sur les diarrhees chez les enfants de moins de 5 de la Cote d'Ivoire |                  | 68.0                      | 3.7                                         |
| Cote d'Ivoire      | 1990-1994   | 1     | 1.2                              | 1992              |                                                                                                                                                            |                  |                           |                                             |
| Cote d'Ivoire      | 1995-1999   | 0     |                                  |                   |                                                                                                                                                            |                  |                           |                                             |
| Cote d'Ivoire      | 2000-2004   | 0     |                                  |                   |                                                                                                                                                            |                  |                           |                                             |
| Cote d'Ivoire      | 2005-2009   | 1     | 0.2                              | 2009              | Africa, Asia, Oceania - INDEPTH Network Cause-Specific Mortality - Release 2014                                                                            |                  | 97.1                      | 6.4                                         |
| Cote d'Ivoire      | 2010-2017   | 1     | 0.2                              | 2011              | Africa, Asia, Oceania - INDEPTH Network Cause-Specific Mortality - Release 2014                                                                            |                  | 96.8                      | 6.4                                         |
| Croatia            | 1980-1984   | 0     |                                  |                   |                                                                                                                                                            |                  |                           |                                             |
| Croatia            | 1985-1989   | 4     | 84.4                             | 1989              | Vital Registration                                                                                                                                         | 100.0            | 15.6                      |                                             |
| Croatia            | 1990-1994   | 5     | 85.3                             | 1990              | Vital Registration                                                                                                                                         | 100.0            | 14.7                      |                                             |
| Croatia            | 1995-1999   | 4     | 82.6                             | 1999              | Vital Registration                                                                                                                                         | 100.0            | 17.4                      |                                             |
| Croatia            | 2000-2004   | 5     | 86.1                             | 2004              | Vital Registration                                                                                                                                         | 100.0            | 13.9                      |                                             |
| Croatia            | 2005-2009   | 5     | 88.3                             | 2009              | Vital Registration                                                                                                                                         | 100.0            | 11.7                      |                                             |
| Croatia            | 2010-2017   | 5     | 92.3                             | 2014              | Vital Registration                                                                                                                                         | 100.0            | 7.7                       |                                             |
| Cuba               | 1980-1984   | 4     | 84.7                             | 1981              | Vital Registration                                                                                                                                         | 99.6             | 15.0                      |                                             |
| Cuba               | 1985-1989   | 5     | 85.1                             | 1988              | Vital Registration                                                                                                                                         | 98.9             | 13.9                      |                                             |
| Cuba               | 1990-1994   | 4     | 84.9                             | 1990              | Vital Registration                                                                                                                                         | 99.4             | 14.5                      |                                             |
| Cuba               | 1995-1999   | 5     | 88.9                             | 1997              | Vital Registration                                                                                                                                         | 100.0            | 11.1                      |                                             |
| Cuba               | 2000-2004   | 5     | 90.2                             | 2003              | Vital Registration                                                                                                                                         | 100.0            | 9.8                       |                                             |
| Cuba               | 2005-2009   | 5     | 91.0                             | 2009              | Vital Registration                                                                                                                                         | 100.0            | 9.0                       |                                             |
| Cuba               | 2010-2017   | 5     | 91.5                             | 2015              | Vital Registration                                                                                                                                         | 100.0            | 8.5                       |                                             |
| Cyprus             | 1980-1984   | 0     |                                  |                   |                                                                                                                                                            |                  |                           |                                             |
| Cyprus             | 1985-1989   | 0     |                                  |                   |                                                                                                                                                            |                  |                           |                                             |
| Cyprus             | 1990-1994   | 0     |                                  |                   |                                                                                                                                                            |                  |                           |                                             |
| Cyprus             | 1995-1999   | 2     | 26.8                             | 1999              | Vital Registration                                                                                                                                         | 76.8             | 65.0                      |                                             |
| Cyprus             | 2000-2004   | 3     | 53.8                             | 2004              | Vital Registration                                                                                                                                         | 77.4             | 30.5                      |                                             |
| Cyprus             | 2005-2009   | 3     | 59.5                             | 2007              | Vital Registration                                                                                                                                         | 77.1             | 22.8                      |                                             |
| Cyprus             | 2010-2017   | 3     | 60.9                             | 2015              | Vital Registration                                                                                                                                         | 75.0             | 18.7                      |                                             |
| Czech Republic     | 1980-1984   | 0     |                                  |                   |                                                                                                                                                            |                  |                           |                                             |
| Czech Republic     | 1985-1989   | 5     | 90.7                             | 1986              | Vital Registration                                                                                                                                         | 100.0            | 9.3                       |                                             |
| Czech Republic     | 1990-1994   | 5     | 89.6                             | 1990              | Vital Registration                                                                                                                                         | 100.0            | 10.4                      |                                             |
| Czech Republic     | 1995-1999   | 4     | 84.8                             | 1995              | Vital Registration                                                                                                                                         | 100.0            | 15.2                      |                                             |
| Czech Republic     | 2000-2004   | 4     | 84.7                             | 2000              | Vital Registration                                                                                                                                         | 99.5             | 14.9                      |                                             |
| Czech Republic     | 2005-2009   | 5     | 85.8                             | 2007              | Vital Registration                                                                                                                                         | 100.0            | 14.2                      |                                             |
| Czech Republic     | 2010-2017   | 5     | 87.8                             | 2013              | Vital Registration                                                                                                                                         | 100.0            | 12.2                      |                                             |
| DR Congo           | 1980-1984   | 0     |                                  |                   |                                                                                                                                                            |                  |                           |                                             |
| DR Congo           | 1985-1989   | 1     | 2.3                              | 1986              | Etude de la mortalité globale et de la mortalité liée au paludisme dans le Kivu montagneux, Zaïre                                                          |                  | 63.5                      | 6.4                                         |
| DR Congo           | 1990-1994   | 1     | 3.0                              | 1990              |                                                                                                                                                            |                  |                           |                                             |
| DR Congo           | 1995-1999   | 0     |                                  |                   | Influence of nutritional status on child mortality in rural Zaire                                                                                          |                  | 14.2                      | 3.5                                         |
| DR Congo           | 2000-2004   | 0     |                                  |                   |                                                                                                                                                            |                  |                           |                                             |
| DR Congo           | 2005-2009   | 0     |                                  |                   |                                                                                                                                                            |                  |                           |                                             |
| DR Congo           | 2010-2017   | 0     |                                  |                   |                                                                                                                                                            |                  |                           |                                             |
| DR Congo           | 2010-2017   | 0     |                                  |                   |                                                                                                                                                            |                  |                           |                                             |
| Denmark            | 1980-1984   | 4     | 84.5                             | 1981              | Vital Registration                                                                                                                                         | 100.0            | 15.5                      |                                             |
| Denmark            | 1985-1989   | 4     | 82.9                             | 1985              | Vital Registration                                                                                                                                         | 100.0            | 17.1                      |                                             |
| Denmark            | 1990-1994   | 4     | 83.1                             | 1994              | Vital Registration                                                                                                                                         | 99.0             | 16.0                      |                                             |
| Denmark            | 1995-1999   | 5     | 85.8                             | 1999              | Vital Registration                                                                                                                                         | 99.0             | 13.3                      |                                             |
| Denmark            | 2000-2004   | 5     | 85.4                             | 2000              | Vital Registration                                                                                                                                         | 100.0            | 14.6                      |                                             |
| Denmark            | 2005-2009   | 4     | 84.5                             | 2005              | Vital Registration                                                                                                                                         | 100.0            | 15.5                      |                                             |
| Denmark            | 2010-2017   | 4     | 84.6                             | 2012              | Vital Registration                                                                                                                                         | 100.0            | 15.4                      |                                             |
| Djibouti           | 1980-1984   | 0     |                                  |                   |                                                                                                                                                            |                  |                           |                                             |
| Djibouti           | 1985-1989   | 0     |                                  |                   |                                                                                                                                                            |                  |                           |                                             |
| Djibouti           | 1990-1994   | 0     |                                  |                   |                                                                                                                                                            |                  |                           |                                             |
| Djibouti           | 1995-1999   | 0     |                                  |                   |                                                                                                                                                            |                  |                           |                                             |
| Djibouti           | 2000-2004   | 0     |                                  |                   |                                                                                                                                                            |                  |                           |                                             |
| Djibouti           | 2005-2009   | 0     |                                  |                   |                                                                                                                                                            |                  |                           |                                             |
| Djibouti           | 2010-2017   | 0     |                                  |                   |                                                                                                                                                            |                  |                           |                                             |
| Dominica           | 1980-1984   | 4     | 71.6                             | 1984              | Vital Registration                                                                                                                                         | 100.0            | 28.4                      |                                             |
| Dominica           | 1985-1989   | 3     | 63.1                             | 1986              | Vital Registration                                                                                                                                         | 100.0            | 36.9                      |                                             |
| Dominica           | 1990-1994   | 3     | 62.1                             | 1992              | Vital Registration                                                                                                                                         | 99.4             | 37.6                      |                                             |
| Dominica           | 1995-1999   | 4     | 65.8                             | 1999              | Vital Registration                                                                                                                                         | 100.0            | 34.2                      |                                             |
| Dominica           | 2000-2004   | 4     | 68.6                             | 2004              | Vital Registration                                                                                                                                         | 98.7             | 30.5                      |                                             |
| Dominica           | 2005-2009   | 4     | 81.7                             | 2007              | Vital Registration                                                                                                                                         | 100.0            | 18.3                      |                                             |
| Dominica           | 2010-2017   | 4     | 83.9                             | 2011              | Vital Registration                                                                                                                                         | 100.0            | 16.1                      |                                             |
| Dominican Republic | 1980-1984   | 3     | 53.6                             | 1984              | Vital Registration                                                                                                                                         | 79.7             | 32.7                      |                                             |
| Dominican Republic | 1985-1989   | 3     | 53.5                             | 1985              | Vital Registration                                                                                                                                         | 77.9             | 31.3                      |                                             |
| Dominican Republic | 1990-1994   | 3     | 44.5                             | 1990              | Vital Registration                                                                                                                                         | 65.6             | 32.2                      |                                             |
| Dominican Republic | 1995-1999   | 3     | 53.8                             | 1999              | Vital Registration                                                                                                                                         | 73.9             | 27.3                      |                                             |
| Dominican Republic | 2000-2004   | 3     | 57.2                             | 2004              | Vital Registration                                                                                                                                         | 75.2             | 24.0                      |                                             |
| Dominican Republic | 2005-2009   | 3     | 56.8                             | 2005              | Vital Registration                                                                                                                                         | 72.2             | 21.3                      |                                             |
| Dominican Republic | 2010-2017   | 3     | 59.9                             | 2013              | Vital Registration                                                                                                                                         | 72.9             | 17.9                      |                                             |
| Ecuador            | 1980-1984   | 4     | 73.0                             | 1982              | Vital Registration                                                                                                                                         | 100.0            | 27.0                      |                                             |
| Ecuador            | 1985-1989   | 4     | 72.4                             | 1988              | Vital Registration                                                                                                                                         | 100.0            | 27.6                      |                                             |

Appendix Table 8. Underlying indicators for percent well-certified for data source with maximum percent well certified in each 5-year time interval for 195 countries, 1980-2017

| Country                        | Time Window | Stars | Percent Well-Certified [PWC] (%) | Max PWC Data Year | Max PWC Data Source                                                                                                                             | Completeness (%) | Percent Major Garbage (%) | Verbal Autopsy Adjustment (None for VR) (%) |
|--------------------------------|-------------|-------|----------------------------------|-------------------|-------------------------------------------------------------------------------------------------------------------------------------------------|------------------|---------------------------|---------------------------------------------|
| Ecuador                        | 1990-1994   | 4     | 72.9                             | 1992              | Vital Registration                                                                                                                              | 100.0            | 27.1                      |                                             |
| Ecuador                        | 1995-1999   | 4     | 69.8                             | 1996              | Vital Registration                                                                                                                              | 97.1             | 28.1                      |                                             |
| Ecuador                        | 2000-2004   | 4     | 66.4                             | 2001              | Vital Registration                                                                                                                              | 98.9             | 32.9                      |                                             |
| Ecuador                        | 2005-2009   | 3     | 62.9                             | 2006              | Vital Registration                                                                                                                              | 86.5             | 27.3                      |                                             |
| Ecuador                        | 2010-2017   | 4     | 70.4                             | 2015              | Vital Registration                                                                                                                              | 85.7             | 17.8                      |                                             |
| Egypt                          | 1980-1984   | 3     | 35.0                             | 1980              | Vital Registration                                                                                                                              | 81.8             | 57.2                      |                                             |
| Egypt                          | 1985-1989   | 3     | 48.2                             | 1987              | Vital Registration                                                                                                                              | 96.6             | 50.1                      |                                             |
| Egypt                          | 1990-1994   | 3     | 46.8                             | 1991              | Vital Registration                                                                                                                              | 93.1             | 49.7                      |                                             |
| Egypt                          | 1995-1999   | 0     |                                  |                   |                                                                                                                                                 |                  |                           |                                             |
| Egypt                          | 2000-2004   | 3     | 43.9                             | 2000              | Vital Registration                                                                                                                              | 98.4             | 55.4                      |                                             |
| Egypt                          | 2005-2009   | 3     | 42.7                             | 2005              | Vital Registration                                                                                                                              | 100.0            | 57.3                      |                                             |
| Egypt                          | 2010-2017   | 3     | 48.2                             | 2014              | Vital Registration                                                                                                                              | 100.0            | 51.8                      |                                             |
| El Salvador                    | 1980-1984   | 4     | 73.3                             | 1981              | Vital Registration                                                                                                                              | 100.0            | 26.7                      |                                             |
| El Salvador                    | 1985-1989   | 0     |                                  |                   |                                                                                                                                                 |                  |                           |                                             |
| El Salvador                    | 1990-1994   | 3     | 60.4                             | 1990              | Vital Registration                                                                                                                              | 90.4             | 33.2                      |                                             |
| El Salvador                    | 1995-1999   | 4     | 67.2                             | 1996              | Vital Registration                                                                                                                              | 93.5             | 28.1                      |                                             |
| El Salvador                    | 2000-2004   | 4     | 69.4                             | 2001              | Vital Registration                                                                                                                              | 99.0             | 29.8                      |                                             |
| El Salvador                    | 2005-2009   | 4     | 70.8                             | 2006              | Vital Registration                                                                                                                              | 100.0            | 29.2                      |                                             |
| El Salvador                    | 2010-2017   | 4     | 67.4                             | 2011              | Vital Registration                                                                                                                              | 99.2             | 32.0                      |                                             |
| Equatorial Guinea              | 1980-1984   | 0     |                                  |                   |                                                                                                                                                 |                  |                           |                                             |
| Equatorial Guinea              | 1985-1989   | 0     |                                  |                   |                                                                                                                                                 |                  |                           |                                             |
| Equatorial Guinea              | 1990-1994   | 0     |                                  |                   |                                                                                                                                                 |                  |                           |                                             |
| Equatorial Guinea              | 1995-1999   | 0     |                                  |                   |                                                                                                                                                 |                  |                           |                                             |
| Equatorial Guinea              | 2000-2004   | 0     |                                  |                   |                                                                                                                                                 |                  |                           |                                             |
| Equatorial Guinea              | 2005-2009   | 0     |                                  |                   |                                                                                                                                                 |                  |                           |                                             |
| Equatorial Guinea              | 2010-2017   | 0     |                                  |                   |                                                                                                                                                 |                  |                           |                                             |
| Eritrea                        | 1980-1984   | 0     |                                  |                   |                                                                                                                                                 |                  |                           |                                             |
| Eritrea                        | 1985-1989   | 0     |                                  |                   |                                                                                                                                                 |                  |                           |                                             |
| Eritrea                        | 1990-1994   | 0     |                                  |                   |                                                                                                                                                 |                  |                           |                                             |
| Eritrea                        | 1995-1999   | 0     |                                  |                   |                                                                                                                                                 |                  |                           |                                             |
| Eritrea                        | 2000-2004   | 0     |                                  |                   |                                                                                                                                                 |                  |                           |                                             |
| Eritrea                        | 2005-2009   | 0     |                                  |                   |                                                                                                                                                 |                  |                           |                                             |
| Eritrea                        | 2010-2017   | 0     |                                  |                   |                                                                                                                                                 |                  |                           |                                             |
| Estonia                        | 1980-1984   | 5     | 92.1                             | 1981              | Vital Registration                                                                                                                              | 99.9             | 7.8                       |                                             |
| Estonia                        | 1985-1989   | 5     | 92.7                             | 1986              | Vital Registration                                                                                                                              | 100.0            | 7.3                       |                                             |
| Estonia                        | 1990-1994   | 5     | 93.8                             | 1994              | Vital Registration                                                                                                                              | 100.0            | 6.2                       |                                             |
| Estonia                        | 1995-1999   | 5     | 93.1                             | 1996              | Vital Registration                                                                                                                              | 100.0            | 6.9                       |                                             |
| Estonia                        | 2000-2004   | 5     | 92.5                             | 2000              | Vital Registration                                                                                                                              | 100.0            | 7.5                       |                                             |
| Estonia                        | 2005-2009   | 5     | 94.1                             | 2009              | Vital Registration                                                                                                                              | 100.0            | 5.8                       |                                             |
| Estonia                        | 2010-2017   | 5     | 93.9                             | 2010              | Vital Registration                                                                                                                              | 100.0            | 6.1                       |                                             |
| Ethiopia                       | 1980-1984   | 0     |                                  |                   |                                                                                                                                                 |                  |                           |                                             |
| Ethiopia                       | 1985-1989   | 1     | 1.2                              | 1987              | The Butajira rural health project in Ethiopia: mortality pattern of the under fives                                                             |                  | 62.5                      | 3.1                                         |
| Ethiopia                       | 1990-1994   | 1     | 2.5                              | 1992              | Patterns of childhood mortality in three districts of north Gondar Administrative Zone. A community based study using the verbal autopsy method |                  | 19.5                      | 3.1                                         |
| Ethiopia                       | 1995-1999   | 1     | 0.6                              | 1995              | Africa, Asia, Oceania - INDEPTH Network Cause-Specific Mortality - Release 2014                                                                 |                  | 90.3                      | 6.4                                         |
| Ethiopia                       | 2000-2004   | 1     | 5.0                              | 2001              | HIV/AIDS-Related Mortality In Addis Ababa City Administration                                                                                   |                  | 22.5                      | 6.4                                         |
| Ethiopia                       | 2005-2009   | 1     | 4.6                              | 2009              | Ethiopia Demographic Surveillance Verbal Autopsy Data 2009-2013                                                                                 |                  | 27.6                      | 6.4                                         |
| Ethiopia                       | 2010-2017   | 1     | 4.6                              | 2010              | Ethiopia Demographic Surveillance Verbal Autopsy Data 2009-2013                                                                                 |                  | 28.1                      | 6.4                                         |
| Federated States of Micronesia | 1980-1984   | 0     |                                  |                   |                                                                                                                                                 |                  |                           |                                             |
| Federated States of Micronesia | 1985-1989   | 0     |                                  |                   |                                                                                                                                                 |                  |                           |                                             |
| Federated States of Micronesia | 1990-1994   | 0     |                                  |                   |                                                                                                                                                 |                  |                           |                                             |
| Federated States of Micronesia | 1995-1999   | 0     |                                  |                   |                                                                                                                                                 |                  |                           |                                             |
| Federated States of Micronesia | 2000-2004   | 0     |                                  |                   |                                                                                                                                                 |                  |                           |                                             |
| Federated States of Micronesia | 2005-2009   | 0     |                                  |                   |                                                                                                                                                 |                  |                           |                                             |
| Federated States of Micronesia | 2010-2017   | 0     |                                  |                   |                                                                                                                                                 |                  |                           |                                             |
| Fiji                           | 1980-1984   | 0     |                                  |                   |                                                                                                                                                 |                  |                           |                                             |
| Fiji                           | 1985-1989   | 0     |                                  |                   |                                                                                                                                                 |                  |                           |                                             |
| Fiji                           | 1990-1994   | 0     |                                  |                   |                                                                                                                                                 |                  |                           |                                             |
| Fiji                           | 1995-1999   | 2     | 34.8                             | 1999              | Vital Registration                                                                                                                              | 61.0             | 42.9                      |                                             |
| Fiji                           | 2000-2004   | 3     | 58.0                             | 2004              | Vital Registration                                                                                                                              | 97.9             | 40.8                      |                                             |
| Fiji                           | 2005-2009   | 3     | 63.9                             | 2008              | Vital Registration                                                                                                                              | 100.0            | 36.1                      |                                             |
| Fiji                           | 2010-2017   | 4     | 70.0                             | 2012              | Vital Registration                                                                                                                              | 99.4             | 29.6                      |                                             |
| Finland                        | 1980-1984   | 4     | 83.7                             | 1980              | Vital Registration                                                                                                                              | 100.0            | 16.3                      |                                             |
| Finland                        | 1985-1989   | 5     | 91.7                             | 1987              | Vital Registration                                                                                                                              | 100.0            | 8.3                       |                                             |
| Finland                        | 1990-1994   | 5     | 91.7                             | 1993              | Vital Registration                                                                                                                              | 100.0            | 8.3                       |                                             |
| Finland                        | 1995-1999   | 5     | 95.8                             | 1999              | Vital Registration                                                                                                                              | 100.0            | 4.2                       |                                             |
| Finland                        | 2000-2004   | 5     | 95.6                             | 2003              | Vital Registration                                                                                                                              | 100.0            | 4.4                       |                                             |
| Finland                        | 2005-2009   | 5     | 94.9                             | 2006              | Vital Registration                                                                                                                              | 99.8             | 4.9                       |                                             |
| Finland                        | 2010-2017   | 5     | 95.9                             | 2015              | Vital Registration                                                                                                                              | 100.0            | 4.1                       |                                             |
| France                         | 1980-1984   | 4     | 76.1                             | 1984              | Vital Registration                                                                                                                              | 99.6             | 23.6                      |                                             |
| France                         | 1985-1989   | 4     | 78.4                             | 1988              | Vital Registration                                                                                                                              | 100.0            | 21.6                      |                                             |
| France                         | 1990-1994   | 4     | 79.1                             | 1993              | Vital Registration                                                                                                                              | 100.0            | 20.9                      |                                             |

Appendix Table 8. Underlying indicators for percent well-certified for data source with maximum percent well certified in each 5-year time interval for 195 countries, 1980-2017

| Country   | Time Window | Stars | Percent Well-Certified [PWC] (%) | Max PWC Data Year | Max PWC Data Source                                                                                                  | Completeness (%) | Percent Major Garbage (%) | Verbal Autopsy Adjustment (None for VR) (%) |
|-----------|-------------|-------|----------------------------------|-------------------|----------------------------------------------------------------------------------------------------------------------|------------------|---------------------------|---------------------------------------------|
| France    | 1995-1999   | 4     | 79.0                             | 1998              | Vital Registration                                                                                                   | 100.0            | 21.0                      |                                             |
| France    | 2000-2004   | 4     | 79.1                             | 2000              | Vital Registration                                                                                                   | 100.0            | 20.9                      |                                             |
| France    | 2005-2009   | 4     | 79.4                             | 2005              | Vital Registration                                                                                                   | 100.0            | 20.6                      |                                             |
| France    | 2010-2017   | 4     | 77.4                             | 2010              | Vital Registration                                                                                                   | 99.6             | 22.3                      |                                             |
| Gabon     | 1980-1984   | 0     |                                  |                   |                                                                                                                      |                  |                           |                                             |
| Gabon     | 1985-1989   | 0     |                                  |                   |                                                                                                                      |                  |                           |                                             |
| Gabon     | 1990-1994   | 0     |                                  |                   |                                                                                                                      |                  |                           |                                             |
| Gabon     | 1995-1999   | 0     |                                  |                   |                                                                                                                      |                  |                           |                                             |
| Gabon     | 2000-2004   | 0     |                                  |                   |                                                                                                                      |                  |                           |                                             |
| Gabon     | 2005-2009   | 0     |                                  |                   |                                                                                                                      |                  |                           |                                             |
| Gabon     | 2010-2017   | 0     |                                  |                   |                                                                                                                      |                  |                           |                                             |
| Georgia   | 1980-1984   | 4     | 83.4                             | 1981              | Vital Registration                                                                                                   | 92.7             | 10.0                      |                                             |
| Georgia   | 1985-1989   | 4     | 80.7                             | 1988              | Vital Registration                                                                                                   | 88.1             | 8.4                       |                                             |
| Georgia   | 1990-1994   | 4     | 81.3                             | 1992              | Vital Registration                                                                                                   | 89.1             | 8.8                       |                                             |
| Georgia   | 1995-1999   | 4     | 77.7                             | 1995              | Vital Registration                                                                                                   | 85.4             | 8.9                       |                                             |
| Georgia   | 2000-2004   | 4     | 78.7                             | 2000              | Vital Registration                                                                                                   | 88.9             | 11.5                      |                                             |
| Georgia   | 2005-2009   | 3     | 62.2                             | 2005              | Vital Registration                                                                                                   | 98.1             | 36.6                      |                                             |
| Georgia   | 2010-2017   | 3     | 58.9                             | 2014              | Vital Registration                                                                                                   | 100.0            | 41.1                      |                                             |
| Germany   | 1980-1984   | 4     | 78.4                             | 1984              | Vital Registration                                                                                                   | 100.0            | 21.6                      |                                             |
| Germany   | 1985-1989   | 4     | 80.5                             | 1989              | Vital Registration                                                                                                   | 100.0            | 19.5                      |                                             |
| Germany   | 1990-1994   | 4     | 84.1                             | 1993              | Vital Registration                                                                                                   | 100.0            | 15.9                      |                                             |
| Germany   | 1995-1999   | 4     | 83.9                             | 1998              | Vital Registration                                                                                                   | 100.0            | 16.1                      |                                             |
| Germany   | 2000-2004   | 4     | 83.5                             | 2004              | Vital Registration                                                                                                   | 100.0            | 16.5                      |                                             |
| Germany   | 2005-2009   | 4     | 83.8                             | 2006              | Vital Registration                                                                                                   | 100.0            | 16.2                      |                                             |
| Germany   | 2010-2017   | 4     | 84.0                             | 2011              | Vital Registration                                                                                                   | 99.9             | 15.9                      |                                             |
| Ghana     | 1980-1984   | 0     |                                  |                   |                                                                                                                      |                  |                           |                                             |
| Ghana     | 1985-1989   | 1     | 0.1                              | 1989              | Maternal mortality among the Kassena-Nankana of northern Ghana                                                       |                  | 79.0                      | 0.5                                         |
| Ghana     | 1990-1994   | 1     | 1.5                              | 1990              | Vitamin A supplementation in northern Ghana: effects on clinic attendances, hospital admissions, and child mortality |                  | 27.9                      | 2.0                                         |
| Ghana     | 1995-1999   | 1     | 0.8                              | 1998              | Trend and causes of neonatal mortality in the Kassena-Nankana district of northern Ghana, 1995-2002                  |                  | 6.0                       | 0.8                                         |
| Ghana     | 2000-2004   | 1     | 7.2                              | 2000              | Vital Registration                                                                                                   | 10.6             | 32.8                      |                                             |
| Ghana     | 2005-2009   | 2     | 16.7                             | 2006              | Ghana Child Verbal Autopsy Study 2008                                                                                |                  | 8.2                       | 18.2                                        |
| Ghana     | 2010-2017   | 1     | 0.5                              | 2011              | Africa, Asia, Oceania - INDEPTH Network Cause-Specific Mortality - Release 2014                                      |                  | 92.7                      | 6.4                                         |
| Greece    | 1980-1984   | 4     | 80.2                             | 1984              | Vital Registration                                                                                                   | 99.0             | 19.0                      |                                             |
| Greece    | 1985-1989   | 4     | 81.6                             | 1985              | Vital Registration                                                                                                   | 100.0            | 18.4                      |                                             |
| Greece    | 1990-1994   | 4     | 71.7                             | 1994              | Vital Registration                                                                                                   | 100.0            | 28.3                      |                                             |
| Greece    | 1995-1999   | 4     | 72.0                             | 1995              | Vital Registration                                                                                                   | 100.0            | 28.0                      |                                             |
| Greece    | 2000-2004   | 4     | 72.6                             | 2001              | Vital Registration                                                                                                   | 100.0            | 27.4                      |                                             |
| Greece    | 2005-2009   | 4     | 77.9                             | 2009              | Vital Registration                                                                                                   | 100.0            | 22.1                      |                                             |
| Greece    | 2010-2017   | 4     | 76.2                             | 2010              | Vital Registration                                                                                                   | 100.0            | 23.8                      |                                             |
| Greenland | 1980-1984   | 0     |                                  |                   |                                                                                                                      |                  |                           |                                             |
| Greenland | 1985-1989   | 0     |                                  |                   |                                                                                                                      |                  |                           |                                             |
| Greenland | 1990-1994   | 0     |                                  |                   |                                                                                                                      |                  |                           |                                             |
| Greenland | 1995-1999   | 5     | 90.2                             | 1999              | Vital Registration                                                                                                   | 100.0            | 9.8                       |                                             |
| Greenland | 2000-2004   | 5     | 89.7                             | 2001              | Vital Registration                                                                                                   | 100.0            | 10.3                      |                                             |
| Greenland | 2005-2009   | 5     | 89.6                             | 2005              | Vital Registration                                                                                                   | 100.0            | 10.4                      |                                             |
| Greenland | 2010-2017   | 5     | 87.6                             | 2010              | Vital Registration                                                                                                   | 100.0            | 12.4                      |                                             |
| Grenada   | 1980-1984   | 4     | 67.7                             | 1984              | Vital Registration                                                                                                   | 95.4             | 29.0                      |                                             |
| Grenada   | 1985-1989   | 3     | 63.4                             | 1988              | Vital Registration                                                                                                   | 100.0            | 36.6                      |                                             |
| Grenada   | 1990-1994   | 3     | 64.0                             | 1994              | Vital Registration                                                                                                   | 100.0            | 36.0                      |                                             |
| Grenada   | 1995-1999   | 3     | 63.2                             | 1995              | Vital Registration                                                                                                   | 100.0            | 36.8                      |                                             |
| Grenada   | 2000-2004   | 4     | 77.0                             | 2002              | Vital Registration                                                                                                   | 100.0            | 23.0                      |                                             |
| Grenada   | 2005-2009   | 4     | 79.9                             | 2009              | Vital Registration                                                                                                   | 100.0            | 20.1                      |                                             |
| Grenada   | 2010-2017   | 5     | 85.9                             | 2016              | Vital Registration                                                                                                   | 100.0            | 14.1                      |                                             |
| Guam      | 1980-1984   | 0     |                                  |                   |                                                                                                                      |                  |                           |                                             |
| Guam      | 1985-1989   | 0     |                                  |                   |                                                                                                                      |                  |                           |                                             |
| Guam      | 1990-1994   | 5     | 85.9                             | 1994              | Vital Registration                                                                                                   | 91.7             | 6.3                       |                                             |
| Guam      | 1995-1999   | 4     | 80.7                             | 1999              | Vital Registration                                                                                                   | 87.6             | 7.9                       |                                             |
| Guam      | 2000-2004   | 4     | 76.7                             | 2001              | Vital Registration                                                                                                   | 84.2             | 8.8                       |                                             |
| Guam      | 2005-2009   | 4     | 79.9                             | 2009              | Vital Registration                                                                                                   | 87.0             | 8.2                       |                                             |
| Guam      | 2010-2017   | 4     | 79.2                             | 2010              | Vital Registration                                                                                                   | 88.4             | 10.4                      |                                             |
| Guatemala | 1980-1984   | 4     | 80.1                             | 1980              | Vital Registration                                                                                                   | 100.0            | 19.9                      |                                             |
| Guatemala | 1985-1989   | 4     | 75.0                             | 1987              | Vital Registration                                                                                                   | 100.0            | 25.0                      |                                             |
| Guatemala | 1990-1994   | 4     | 73.9                             | 1990              | Vital Registration                                                                                                   | 100.0            | 26.1                      |                                             |
| Guatemala | 1995-1999   | 4     | 72.6                             | 1998              | Vital Registration                                                                                                   | 100.0            | 27.4                      |                                             |
| Guatemala | 2000-2004   | 4     | 73.3                             | 2002              | Vital Registration                                                                                                   | 100.0            | 26.7                      |                                             |
| Guatemala | 2005-2009   | 4     | 75.2                             | 2009              | Vital Registration                                                                                                   | 100.0            | 24.8                      |                                             |
| Guatemala | 2010-2017   | 4     | 78.0                             | 2014              | Vital Registration                                                                                                   | 99.7             | 21.7                      |                                             |
| Guinea    | 1980-1984   | 0     |                                  |                   |                                                                                                                      |                  |                           |                                             |
| Guinea    | 1985-1989   | 0     |                                  |                   |                                                                                                                      |                  |                           |                                             |
| Guinea    | 1990-1994   | 0     |                                  |                   |                                                                                                                      |                  |                           |                                             |
| Guinea    | 1995-1999   | 1     | 3.2                              | 1998              | Guinea - Mandiana Mortality Study 1998-1999                                                                          |                  | 5.5                       | 3.4                                         |
| Guinea    | 2000-2004   | 0     |                                  |                   |                                                                                                                      |                  |                           |                                             |

**Appendix Table 8. Underlying indicators for percent well-certified for data source with maximum percent well certified in each 5-year time interval for 195 countries, 1980-2017**

| Country       | Time Window | Stars | Percent Well-Certified [PWC] (%) | Max PWC Data Year | Max PWC Data Source                                                                                                                                                                      | Completeness (%)   | Percent Major Garbage (%) | Verbal Autopsy Adjustment (None for VR) (%) |
|---------------|-------------|-------|----------------------------------|-------------------|------------------------------------------------------------------------------------------------------------------------------------------------------------------------------------------|--------------------|---------------------------|---------------------------------------------|
| Guinea        | 2005-2009   | 0     |                                  |                   |                                                                                                                                                                                          |                    |                           |                                             |
| Guinea        | 2010-2017   | 0     |                                  |                   |                                                                                                                                                                                          |                    |                           |                                             |
| Guinea-Bissau | 1980-1984   | 0     |                                  |                   |                                                                                                                                                                                          |                    |                           |                                             |
| Guinea-Bissau | 1985-1989   | 0     |                                  |                   |                                                                                                                                                                                          |                    |                           |                                             |
| Guinea-Bissau | 1990-1994   | 1     | 0.1                              | 1992              | Maternal mortality in Guinea-Bissau: the use of verbal autopsy in a multi-ethnic population<br>BCG vaccination scar associated with better childhood survival in Guinea-Bissau           |                    | 80.9                      | 0.4                                         |
| Guinea-Bissau | 1995-1999   | 1     | 1.2                              | 1995              |                                                                                                                                                                                          |                    | 45.6                      | 2.2                                         |
| Guinea-Bissau | 2000-2004   | 0     |                                  |                   |                                                                                                                                                                                          |                    |                           |                                             |
| Guinea-Bissau | 2005-2009   | 0     |                                  |                   |                                                                                                                                                                                          |                    |                           |                                             |
| Guinea-Bissau | 2010-2017   | 0     |                                  |                   |                                                                                                                                                                                          |                    |                           |                                             |
| Guyana        | 1980-1984   | 3     | 55.5                             | 1984              |                                                                                                                                                                                          | Vital Registration | 84.2                      | 34.1                                        |
| Guyana        | 1985-1989   | 4     | 76.2                             | 1989              | Vital Registration                                                                                                                                                                       | 99.1               | 23.1                      |                                             |
| Guyana        | 1990-1994   | 4     | 69.8                             | 1990              | Vital Registration                                                                                                                                                                       | 91.8               | 24.0                      |                                             |
| Guyana        | 1995-1999   | 4     | 78.3                             | 1995              | Vital Registration                                                                                                                                                                       | 99.0               | 20.9                      |                                             |
| Guyana        | 2000-2004   | 4     | 84.3                             | 2000              | Vital Registration                                                                                                                                                                       | 96.8               | 12.9                      |                                             |
| Guyana        | 2005-2009   | 5     | 85.5                             | 2005              | Vital Registration                                                                                                                                                                       | 98.6               | 13.2                      |                                             |
| Guyana        | 2010-2017   | 4     | 78.6                             | 2010              | Vital Registration                                                                                                                                                                       | 95.7               | 17.9                      |                                             |
| Haiti         | 1980-1984   | 2     | 22.3                             | 1981              | Vital Registration                                                                                                                                                                       | 48.1               | 53.7                      |                                             |
| Haiti         | 1985-1989   | 1     | 1.3                              | 1989              | The utility of verbal autopsies for identifying HIV-1-related deaths in Haitian children                                                                                                 |                    | 21.7                      | 1.7                                         |
| Haiti         | 1990-1994   | 1     | 1.0                              | 1994              | Survey on Infant mortality in Mirebalais, Haiti                                                                                                                                          |                    | 36.5                      | 1.5                                         |
| Haiti         | 1995-1999   | 2     | 13.9                             | 1999              | Vital Registration                                                                                                                                                                       | 30.5               | 54.4                      |                                             |
| Haiti         | 2000-2004   | 1     | 6.1                              | 2002              | Vital Registration                                                                                                                                                                       | 10.4               | 41.2                      |                                             |
| Haiti         | 2005-2009   | 0     |                                  |                   |                                                                                                                                                                                          |                    |                           |                                             |
| Haiti         | 2010-2017   | 0     |                                  |                   |                                                                                                                                                                                          |                    |                           |                                             |
| Honduras      | 1980-1984   | 3     | 41.2                             | 1981              | Vital Registration                                                                                                                                                                       | 79.6               | 48.3                      |                                             |
| Honduras      | 1985-1989   | 3     | 46.0                             | 1988              | Vital Registration                                                                                                                                                                       | 70.6               | 34.8                      |                                             |
| Honduras      | 1990-1994   | 3     | 43.2                             | 1990              | Vital Registration                                                                                                                                                                       | 65.9               | 34.5                      |                                             |
| Honduras      | 1995-1999   | 0     |                                  |                   |                                                                                                                                                                                          |                    |                           |                                             |
| Honduras      | 2000-2004   | 0     |                                  |                   |                                                                                                                                                                                          |                    |                           |                                             |
| Honduras      | 2005-2009   | 2     | 17.5                             | 2008              | Vital Registration                                                                                                                                                                       | 19.8               | 11.9                      |                                             |
| Honduras      | 2010-2017   | 2     | 19.1                             | 2013              | Vital Registration                                                                                                                                                                       | 21.1               | 9.6                       |                                             |
| Hungary       | 1980-1984   | 5     | 91.0                             | 1980              | Vital Registration                                                                                                                                                                       | 100.0              | 9.0                       |                                             |
| Hungary       | 1985-1989   | 5     | 89.8                             | 1988              | Vital Registration                                                                                                                                                                       | 100.0              | 10.2                      |                                             |
| Hungary       | 1990-1994   | 5     | 89.9                             | 1994              | Vital Registration                                                                                                                                                                       | 100.0              | 10.1                      |                                             |
| Hungary       | 1995-1999   | 5     | 91.0                             | 1997              | Vital Registration                                                                                                                                                                       | 100.0              | 9.0                       |                                             |
| Hungary       | 2000-2004   | 5     | 92.1                             | 2003              | Vital Registration                                                                                                                                                                       | 100.0              | 7.9                       |                                             |
| Hungary       | 2005-2009   | 5     | 92.6                             | 2008              | Vital Registration                                                                                                                                                                       | 99.5               | 6.9                       |                                             |
| Hungary       | 2010-2017   | 5     | 93.8                             | 2014              | Vital Registration                                                                                                                                                                       | 100.0              | 6.2                       |                                             |
| Iceland       | 1980-1984   | 5     | 92.6                             | 1983              | Vital Registration                                                                                                                                                                       | 100.0              | 7.4                       |                                             |
| Iceland       | 1985-1989   | 5     | 93.8                             | 1988              | Vital Registration                                                                                                                                                                       | 100.0              | 6.2                       |                                             |
| Iceland       | 1990-1994   | 5     | 94.2                             | 1991              | Vital Registration                                                                                                                                                                       | 100.0              | 5.8                       |                                             |
| Iceland       | 1995-1999   | 5     | 94.1                             | 1999              | Vital Registration                                                                                                                                                                       | 100.0              | 5.9                       |                                             |
| Iceland       | 2000-2004   | 5     | 93.5                             | 2004              | Vital Registration                                                                                                                                                                       | 100.0              | 6.5                       |                                             |
| Iceland       | 2005-2009   | 5     | 92.9                             | 2005              | Vital Registration                                                                                                                                                                       | 100.0              | 7.1                       |                                             |
| Iceland       | 2010-2017   | 5     | 91.4                             | 2010              | Vital Registration                                                                                                                                                                       | 100.0              | 8.6                       |                                             |
| India         | 1980-1984   | 1     | 2.8                              | 1984              | Vital Registration                                                                                                                                                                       | 3.9                | 28.7                      |                                             |
| India         | 1985-1989   | 1     | 3.0                              | 1986              | Vital Registration                                                                                                                                                                       | 4.0                | 23.9                      |                                             |
| India         | 1990-1994   | 1     | 2.9                              | 1991              | Vital Registration                                                                                                                                                                       | 4.6                | 35.6                      |                                             |
| India         | 1995-1999   | 1     | 5.2                              | 1999              | Vital Registration                                                                                                                                                                       | 8.5                | 38.4                      |                                             |
| India         | 2000-2004   | 1     | 6.3                              | 2003              | India Study on Causes of Death by Verbal Autopsy 2003                                                                                                                                    |                    | 1.7                       | 6.4                                         |
| India         | 2005-2009   | 3     | 52.7                             | 2005              | Verbal Autopsy                                                                                                                                                                           |                    | 17.7                      | 64.0                                        |
| India         | 2010-2017   | 3     | 49.0                             | 2012              | Verbal Autopsy                                                                                                                                                                           |                    | 23.4                      | 64.0                                        |
| Indonesia     | 1980-1984   | 1     | 1.4                              | 1983              | The incidence of diarrhoeal diseases and diarrhoeal diseases related mortality in rural swampy low-land area of south Sumatra, Indonesia                                                 |                    | 77.9                      | 6.4                                         |
| Indonesia     | 1985-1989   | 0     |                                  |                   |                                                                                                                                                                                          |                    |                           |                                             |
| Indonesia     | 1990-1994   | 1     | 1.3                              | 1991              | Care-seeking for fatal illnesses in young children in Indramayu, West Java, Indonesia                                                                                                    |                    | 23.4                      | 1.7                                         |
| Indonesia     | 1995-1999   | 1     | 0.4                              | 1997              | Age- and cause-specific childhood mortality in Lombok, Indonesia, as a factor for determining the appropriateness of introducing Haemophilus influenzae type b and pneumococcal vaccines |                    | 34.1                      | 0.6                                         |
| Indonesia     | 2000-2004   | 1     | 0.3                              | 2001              | Determining the Cause of Death: Mortality Surveillance Using Verbal Autopsy in Indonesia                                                                                                 |                    | 96.0                      | 6.4                                         |
| Indonesia     | 2005-2009   | 3     | 53.7                             | 2007              | Indonesia Basic Health Research 2007-2008                                                                                                                                                |                    | 3.9                       | 55.8                                        |
| Indonesia     | 2010-2017   | 3     | 62.3                             | 2013              | Indonesia Sample Registration System - Deaths 2013                                                                                                                                       |                    | 2.6                       | 64.0                                        |
| Iran          | 1980-1984   | 0     |                                  |                   |                                                                                                                                                                                          |                    |                           |                                             |
| Iran          | 1985-1989   | 0     |                                  |                   |                                                                                                                                                                                          |                    |                           |                                             |
| Iran          | 1990-1994   | 0     |                                  |                   |                                                                                                                                                                                          |                    |                           |                                             |
| Iran          | 1995-1999   | 0     |                                  |                   |                                                                                                                                                                                          |                    |                           |                                             |
| Iran          | 2000-2004   | 3     | 52.8                             | 2004              | Vital Registration                                                                                                                                                                       | 70.1               | 24.6                      |                                             |
| Iran          | 2005-2009   | 3     | 63.7                             | 2008              | Vital Registration                                                                                                                                                                       | 77.3               | 17.6                      |                                             |
| Iran          | 2010-2017   | 4     | 80.3                             | 2015              | Vital Registration                                                                                                                                                                       | 100.0              | 19.7                      |                                             |
| Iraq          | 1980-1984   | 0     |                                  |                   |                                                                                                                                                                                          |                    |                           |                                             |
| Iraq          | 1985-1989   | 0     |                                  |                   |                                                                                                                                                                                          |                    |                           |                                             |
| Iraq          | 1990-1994   | 0     |                                  |                   |                                                                                                                                                                                          |                    |                           |                                             |
| Iraq          | 1995-1999   | 0     |                                  |                   |                                                                                                                                                                                          |                    |                           |                                             |

Appendix Table 8. Underlying indicators for percent well-certified for data source with maximum percent well certified in each 5-year time interval for 195 countries, 1980-2017

| Country    | Time Window | Stars | Percent Well-Certified [PWC] (%) | Max PWC Data Year | Max PWC Data Source                                                             | Completeness (%) | Percent Major Garbage (%) | Verbal Autopsy Adjustment (None for VR) (%) |
|------------|-------------|-------|----------------------------------|-------------------|---------------------------------------------------------------------------------|------------------|---------------------------|---------------------------------------------|
| Iraq       | 2000-2004   | 0     |                                  |                   |                                                                                 |                  |                           |                                             |
| Iraq       | 2005-2009   | 3     | 45.8                             | 2008              | Vital Registration                                                              | 78.4             | 41.6                      |                                             |
| Iraq       | 2010-2017   | 3     | 56.7                             | 2014              | Vital Registration                                                              | 92.0             | 38.4                      |                                             |
| Ireland    | 1980-1984   | 5     | 90.3                             | 1983              | Vital Registration                                                              | 100.0            | 9.7                       |                                             |
| Ireland    | 1985-1989   | 5     | 91.6                             | 1988              | Vital Registration                                                              | 100.0            | 8.4                       |                                             |
| Ireland    | 1990-1994   | 5     | 91.7                             | 1993              | Vital Registration                                                              | 100.0            | 8.3                       |                                             |
| Ireland    | 1995-1999   | 5     | 90.9                             | 1995              | Vital Registration                                                              | 100.0            | 9.1                       |                                             |
| Ireland    | 2000-2004   | 5     | 90.2                             | 2002              | Vital Registration                                                              | 99.8             | 9.6                       |                                             |
| Ireland    | 2005-2009   | 5     | 92.4                             | 2007              | Vital Registration                                                              | 99.9             | 7.6                       |                                             |
| Ireland    | 2010-2017   | 5     | 92.3                             | 2012              | Vital Registration                                                              | 100.0            | 7.7                       |                                             |
| Israel     | 1980-1984   | 4     | 81.2                             | 1983              | Vital Registration                                                              | 99.9             | 18.7                      |                                             |
| Israel     | 1985-1989   | 4     | 82.6                             | 1989              | Vital Registration                                                              | 100.0            | 17.4                      |                                             |
| Israel     | 1990-1994   | 4     | 83.2                             | 1993              | Vital Registration                                                              | 100.0            | 16.8                      |                                             |
| Israel     | 1995-1999   | 4     | 82.7                             | 1995              | Vital Registration                                                              | 100.0            | 17.3                      |                                             |
| Israel     | 2000-2004   | 4     | 81.8                             | 2002              | Vital Registration                                                              | 100.0            | 18.2                      |                                             |
| Israel     | 2005-2009   | 4     | 80.1                             | 2005              | Vital Registration                                                              | 100.0            | 19.9                      |                                             |
| Israel     | 2010-2017   | 4     | 80.7                             | 2010              | Vital Registration                                                              | 100.0            | 19.3                      |                                             |
| Italy      | 1980-1984   | 5     | 88.8                             | 1980              | Vital Registration                                                              | 100.0            | 11.2                      |                                             |
| Italy      | 1985-1989   | 5     | 88.4                             | 1989              | Vital Registration                                                              | 100.0            | 11.6                      |                                             |
| Italy      | 1990-1994   | 5     | 88.5                             | 1994              | Vital Registration                                                              | 100.0            | 11.5                      |                                             |
| Italy      | 1995-1999   | 5     | 87.8                             | 1995              | Vital Registration                                                              | 100.0            | 12.2                      |                                             |
| Italy      | 2000-2004   | 5     | 88.1                             | 2003              | Vital Registration                                                              | 100.0            | 11.9                      |                                             |
| Italy      | 2005-2009   | 5     | 88.7                             | 2008              | Vital Registration                                                              | 100.0            | 11.3                      |                                             |
| Italy      | 2010-2017   | 5     | 88.3                             | 2010              | Vital Registration                                                              | 99.9             | 11.6                      |                                             |
| Jamaica    | 1980-1984   | 4     | 70.5                             | 1983              | Vital Registration                                                              | 97.9             | 28.0                      |                                             |
| Jamaica    | 1985-1989   | 4     | 72.8                             | 1987              | Vital Registration                                                              | 100.0            | 27.2                      |                                             |
| Jamaica    | 1990-1994   | 3     | 64.6                             | 1990              | Vital Registration                                                              | 94.4             | 31.6                      |                                             |
| Jamaica    | 1995-1999   | 0     |                                  |                   |                                                                                 |                  |                           |                                             |
| Jamaica    | 2000-2004   | 4     | 83.0                             | 2004              | Vital Registration                                                              | 100.0            | 17.0                      |                                             |
| Jamaica    | 2005-2009   | 5     | 87.5                             | 2009              | Vital Registration                                                              | 100.0            | 12.5                      |                                             |
| Jamaica    | 2010-2017   | 5     | 89.1                             | 2011              | Vital Registration                                                              | 100.0            | 10.9                      |                                             |
| Japan      | 1980-1984   | 4     | 82.6                             | 1980              | Vital Registration                                                              | 100.0            | 17.4                      |                                             |
| Japan      | 1985-1989   | 4     | 81.0                             | 1985              | Vital Registration                                                              | 100.0            | 19.0                      |                                             |
| Japan      | 1990-1994   | 4     | 81.5                             | 1994              | Vital Registration                                                              | 99.7             | 18.3                      |                                             |
| Japan      | 1995-1999   | 5     | 87.6                             | 1995              | Vital Registration                                                              | 100.0            | 12.4                      |                                             |
| Japan      | 2000-2004   | 5     | 85.7                             | 2000              | Vital Registration                                                              | 99.4             | 13.8                      |                                             |
| Japan      | 2005-2009   | 4     | 84.4                             | 2005              | Vital Registration                                                              | 100.0            | 15.6                      |                                             |
| Japan      | 2010-2017   | 4     | 81.3                             | 2010              | Vital Registration                                                              | 100.0            | 18.7                      |                                             |
| Jordan     | 1980-1984   | 0     |                                  |                   |                                                                                 |                  |                           |                                             |
| Jordan     | 1985-1989   | 0     |                                  |                   |                                                                                 |                  |                           |                                             |
| Jordan     | 1990-1994   | 0     |                                  |                   |                                                                                 |                  |                           |                                             |
| Jordan     | 1995-1999   | 1     | 1.9                              | 1995              | Mortality and causes of death in Jordan 1995-96: assessment by verbal autopsy   |                  | 69.6                      | 6.4                                         |
| Jordan     | 2000-2004   | 4     | 70.1                             | 2004              | Vital Registration                                                              | 88.5             | 20.8                      |                                             |
| Jordan     | 2005-2009   | 4     | 76.5                             | 2006              | Vital Registration                                                              | 92.6             | 17.4                      |                                             |
| Jordan     | 2010-2017   | 4     | 74.1                             | 2012              | Vital Registration                                                              | 92.0             | 19.4                      |                                             |
| Kazakhstan | 1980-1984   | 4     | 80.0                             | 1982              | Vital Registration                                                              | 97.5             | 18.0                      |                                             |
| Kazakhstan | 1985-1989   | 4     | 84.9                             | 1989              | Vital Registration                                                              | 99.8             | 15.0                      |                                             |
| Kazakhstan | 1990-1994   | 5     | 89.1                             | 1993              | Vital Registration                                                              | 100.0            | 10.9                      |                                             |
| Kazakhstan | 1995-1999   | 5     | 88.6                             | 1995              | Vital Registration                                                              | 100.0            | 11.4                      |                                             |
| Kazakhstan | 2000-2004   | 5     | 85.0                             | 2000              | Vital Registration                                                              | 98.9             | 14.0                      |                                             |
| Kazakhstan | 2005-2009   | 4     | 84.2                             | 2005              | Vital Registration                                                              | 98.6             | 14.6                      |                                             |
| Kazakhstan | 2010-2017   | 4     | 84.1                             | 2015              | Vital Registration                                                              | 96.3             | 12.7                      |                                             |
| Kenya      | 1980-1984   | 0     |                                  |                   |                                                                                 |                  |                           |                                             |
| Kenya      | 1985-1989   | 1     | 2.7                              | 1986              | Mortality patterns in a rural Kenyan community                                  |                  | 12.0                      | 3.1                                         |
| Kenya      | 1990-1994   | 0     |                                  |                   |                                                                                 |                  |                           |                                             |
| Kenya      | 1995-1999   | 1     | 0.4                              | 1997              | The burden of malaria mortality among African children in the year 2000         |                  | 82.2                      | 2.5                                         |
| Kenya      | 2000-2004   | 1     | 4.9                              | 2003              | Kenya - Nairobi Urban Health and Demographic Surveillance System                |                  | 19.8                      | 6.1                                         |
| Kenya      | 2005-2009   | 1     | 5.4                              | 2006              | Kenya - Nairobi Urban Health and Demographic Surveillance System                |                  | 16.2                      | 6.4                                         |
| Kenya      | 2010-2017   | 1     | 0.8                              | 2011              | Africa, Asia, Oceania - INDEPTH Network Cause-Specific Mortality - Release 2014 |                  | 87.7                      | 6.4                                         |
| Kiribati   | 1980-1984   | 0     |                                  |                   |                                                                                 |                  |                           |                                             |
| Kiribati   | 1985-1989   | 0     |                                  |                   |                                                                                 |                  |                           |                                             |
| Kiribati   | 1990-1994   | 3     | 47.9                             | 1993              | Vital Registration                                                              | 71.6             | 33.1                      |                                             |
| Kiribati   | 1995-1999   | 4     | 66.6                             | 1995              | Vital Registration                                                              | 100.0            | 33.4                      |                                             |
| Kiribati   | 2000-2004   | 3     | 35.6                             | 2000              | Vital Registration                                                              | 65.4             | 45.5                      |                                             |
| Kiribati   | 2005-2009   | 0     |                                  |                   |                                                                                 |                  |                           |                                             |
| Kiribati   | 2010-2017   | 0     |                                  |                   |                                                                                 |                  |                           |                                             |
| Kuwait     | 1980-1984   | 4     | 82.1                             | 1981              | Vital Registration                                                              | 100.0            | 17.9                      |                                             |
| Kuwait     | 1985-1989   | 4     | 81.9                             | 1985              | Vital Registration                                                              | 100.0            | 18.1                      |                                             |
| Kuwait     | 1990-1994   | 4     | 76.4                             | 1994              | Vital Registration                                                              | 97.1             | 21.3                      |                                             |
| Kuwait     | 1995-1999   | 4     | 77.5                             | 1998              | Vital Registration                                                              | 99.4             | 22.0                      |                                             |
| Kuwait     | 2000-2004   | 4     | 83.1                             | 2004              | Vital Registration                                                              | 100.0            | 16.9                      |                                             |
| Kuwait     | 2005-2009   | 4     | 84.9                             | 2009              | Vital Registration                                                              | 100.0            | 15.1                      |                                             |



Appendix Table 8. Underlying indicators for percent well-certified for data source with maximum percent well certified in each 5-year time interval for 195 countries, 1980-2017

| Country    | Time Window | Stars | Percent Well-Certified [PWC] (%) | Max PWC Data Year | Max PWC Data Source                                                                                                                                  | Completeness (%) | Percent Major Garbage (%) | Verbal Autopsy Adjustment (None for VR) (%) |
|------------|-------------|-------|----------------------------------|-------------------|------------------------------------------------------------------------------------------------------------------------------------------------------|------------------|---------------------------|---------------------------------------------|
| Kuwait     | 2010-2017   | 4     | 84.6                             | 2010              | Vital Registration                                                                                                                                   | 99.1             | 14.7                      |                                             |
| Kyrgyzstan | 1980-1984   | 4     | 67.5                             | 1981              | Vital Registration                                                                                                                                   | 81.7             | 17.3                      |                                             |
| Kyrgyzstan | 1985-1989   | 4     | 75.9                             | 1988              | Vital Registration                                                                                                                                   | 87.7             | 13.5                      |                                             |
| Kyrgyzstan | 1990-1994   | 4     | 72.5                             | 1994              | Vital Registration                                                                                                                                   | 93.1             | 22.1                      |                                             |
| Kyrgyzstan | 1995-1999   | 4     | 74.4                             | 1998              | Vital Registration                                                                                                                                   | 91.7             | 18.9                      |                                             |
| Kyrgyzstan | 2000-2004   | 5     | 87.4                             | 2003              | Vital Registration                                                                                                                                   | 95.7             | 8.7                       |                                             |
| Kyrgyzstan | 2005-2009   | 5     | 92.9                             | 2008              | Vital Registration                                                                                                                                   | 100.0            | 7.1                       |                                             |
| Kyrgyzstan | 2010-2017   | 5     | 93.2                             | 2014              | Vital Registration                                                                                                                                   | 100.0            | 6.8                       |                                             |
| Laos       | 1980-1984   | 0     |                                  |                   |                                                                                                                                                      |                  |                           |                                             |
| Laos       | 1985-1989   | 1     | 1.3                              | 1989              | The Lao People's Democratic Republic: maternal mortality and female mortality: determining causes of death                                           |                  | 68.7                      | 4.2                                         |
| Laos       | 1990-1994   | 0     |                                  |                   |                                                                                                                                                      |                  |                           |                                             |
| Laos       | 1995-1999   | 0     |                                  |                   |                                                                                                                                                      |                  |                           |                                             |
| Laos       | 2000-2004   | 0     |                                  |                   |                                                                                                                                                      |                  |                           |                                             |
| Laos       | 2005-2009   | 0     |                                  |                   |                                                                                                                                                      |                  |                           |                                             |
| Laos       | 2010-2017   | 0     |                                  |                   |                                                                                                                                                      |                  |                           |                                             |
| Latvia     | 1980-1984   | 5     | 92.5                             | 1984              | Vital Registration                                                                                                                                   | 100.0            | 7.5                       |                                             |
| Latvia     | 1985-1989   | 5     | 92.7                             | 1985              | Vital Registration                                                                                                                                   | 100.0            | 7.3                       |                                             |
| Latvia     | 1990-1994   | 5     | 89.3                             | 1990              | Vital Registration                                                                                                                                   | 100.0            | 10.7                      |                                             |
| Latvia     | 1995-1999   | 5     | 92.0                             | 1999              | Vital Registration                                                                                                                                   | 100.0            | 8.0                       |                                             |
| Latvia     | 2000-2004   | 5     | 91.1                             | 2000              | Vital Registration                                                                                                                                   | 100.0            | 8.9                       |                                             |
| Latvia     | 2005-2009   | 5     | 88.7                             | 2007              | Vital Registration                                                                                                                                   | 99.4             | 10.8                      |                                             |
| Latvia     | 2010-2017   | 5     | 94.3                             | 2015              | Vital Registration                                                                                                                                   | 100.0            | 5.7                       |                                             |
| Lebanon    | 1980-1984   | 0     |                                  |                   |                                                                                                                                                      |                  |                           |                                             |
| Lebanon    | 1985-1989   | 1     | 3.5                              | 1988              | Non-communicable disease mortality rates using the verbal autopsy in a cohort of middle aged and older populations in Beirut during wartime, 1983-93 |                  | 16.8                      | 4.2                                         |
| Lebanon    | 1990-1994   | 0     |                                  |                   |                                                                                                                                                      |                  |                           |                                             |
| Lebanon    | 1995-1999   | 0     |                                  |                   |                                                                                                                                                      |                  |                           |                                             |
| Lebanon    | 2000-2004   | 1     | 0.0                              | 2000              | Facility-based audit of maternal mortality in Lebanon: A feasibility study                                                                           |                  | 94.6                      | 0.4                                         |
| Lebanon    | 2005-2009   | 0     |                                  |                   |                                                                                                                                                      |                  |                           |                                             |
| Lebanon    | 2010-2017   | 0     |                                  |                   |                                                                                                                                                      |                  |                           |                                             |
| Lesotho    | 1980-1984   | 0     |                                  |                   |                                                                                                                                                      |                  |                           |                                             |
| Lesotho    | 1985-1989   | 0     |                                  |                   |                                                                                                                                                      |                  |                           |                                             |
| Lesotho    | 1990-1994   | 0     |                                  |                   |                                                                                                                                                      |                  |                           |                                             |
| Lesotho    | 1995-1999   | 0     |                                  |                   |                                                                                                                                                      |                  |                           |                                             |
| Lesotho    | 2000-2004   | 0     |                                  |                   |                                                                                                                                                      |                  |                           |                                             |
| Lesotho    | 2005-2009   | 0     |                                  |                   |                                                                                                                                                      |                  |                           |                                             |
| Lesotho    | 2010-2017   | 0     |                                  |                   |                                                                                                                                                      |                  |                           |                                             |
| Liberia    | 1980-1984   | 1     | 2.1                              | 1984              | Infant and child mortality in two counties of Liberia: results of a survey in 1988 and trends since 1984                                             |                  | 48.0                      | 3.9                                         |
| Liberia    | 1985-1989   | 1     | 2.1                              | 1987              | Infant and child mortality in two counties of Liberia: results of a survey in 1988 and trends since 1984                                             |                  | 45.5                      | 3.9                                         |
| Liberia    | 1990-1994   | 1     | 3.2                              | 1990              | Application of the verbal autopsy during a clinical trial                                                                                            |                  | 29.2                      | 4.6                                         |
| Liberia    | 1995-1999   | 0     |                                  |                   |                                                                                                                                                      |                  |                           |                                             |
| Liberia    | 2000-2004   | 0     |                                  |                   |                                                                                                                                                      |                  |                           |                                             |
| Liberia    | 2005-2009   | 0     |                                  |                   |                                                                                                                                                      |                  |                           |                                             |
| Liberia    | 2010-2017   | 0     |                                  |                   |                                                                                                                                                      |                  |                           |                                             |
| Libya      | 1980-1984   | 0     |                                  |                   |                                                                                                                                                      |                  |                           |                                             |
| Libya      | 1985-1989   | 0     |                                  |                   |                                                                                                                                                      |                  |                           |                                             |
| Libya      | 1990-1994   | 0     |                                  |                   |                                                                                                                                                      |                  |                           |                                             |
| Libya      | 1995-1999   | 0     |                                  |                   |                                                                                                                                                      |                  |                           |                                             |
| Libya      | 2000-2004   | 0     |                                  |                   |                                                                                                                                                      |                  |                           |                                             |
| Libya      | 2005-2009   | 2     | 12.6                             | 2006              | Vital Registration                                                                                                                                   | 96.2             | 86.9                      |                                             |
| Libya      | 2010-2017   | 0     |                                  |                   |                                                                                                                                                      |                  |                           |                                             |
| Lithuania  | 1980-1984   | 5     | 90.1                             | 1982              | Vital Registration                                                                                                                                   | 98.5             | 8.5                       |                                             |
| Lithuania  | 1985-1989   | 5     | 94.0                             | 1988              | Vital Registration                                                                                                                                   | 100.0            | 6.0                       |                                             |
| Lithuania  | 1990-1994   | 5     | 93.7                             | 1990              | Vital Registration                                                                                                                                   | 100.0            | 6.3                       |                                             |
| Lithuania  | 1995-1999   | 5     | 94.8                             | 1997              | Vital Registration                                                                                                                                   | 100.0            | 5.2                       |                                             |
| Lithuania  | 2000-2004   | 5     | 92.9                             | 2002              | Vital Registration                                                                                                                                   | 100.0            | 7.1                       |                                             |
| Lithuania  | 2005-2009   | 5     | 93.3                             | 2009              | Vital Registration                                                                                                                                   | 100.0            | 6.7                       |                                             |
| Lithuania  | 2010-2017   | 5     | 94.6                             | 2013              | Vital Registration                                                                                                                                   | 100.0            | 5.4                       |                                             |
| Luxembourg | 1980-1984   | 5     | 86.4                             | 1984              | Vital Registration                                                                                                                                   | 99.9             | 13.6                      |                                             |
| Luxembourg | 1985-1989   | 5     | 85.8                             | 1985              | Vital Registration                                                                                                                                   | 98.9             | 13.3                      |                                             |
| Luxembourg | 1990-1994   | 5     | 85.5                             | 1992              | Vital Registration                                                                                                                                   | 100.0            | 14.5                      |                                             |
| Luxembourg | 1995-1999   | 4     | 84.5                             | 1997              | Vital Registration                                                                                                                                   | 100.0            | 15.5                      |                                             |
| Luxembourg | 2000-2004   | 4     | 80.6                             | 2000              | Vital Registration                                                                                                                                   | 98.2             | 17.9                      |                                             |
| Luxembourg | 2005-2009   | 4     | 77.9                             | 2007              | Vital Registration                                                                                                                                   | 100.0            | 22.1                      |                                             |
| Luxembourg | 2010-2017   | 4     | 82.5                             | 2015              | Vital Registration                                                                                                                                   | 100.0            | 17.5                      |                                             |
| Macedonia  | 1980-1984   | 0     |                                  |                   |                                                                                                                                                      |                  |                           |                                             |
| Macedonia  | 1985-1989   | 0     |                                  |                   |                                                                                                                                                      |                  |                           |                                             |
| Macedonia  | 1990-1994   | 4     | 82.5                             | 1994              | Vital Registration                                                                                                                                   | 100.0            | 17.5                      |                                             |
| Macedonia  | 1995-1999   | 4     | 83.8                             | 1998              | Vital Registration                                                                                                                                   | 100.0            | 16.2                      |                                             |
| Macedonia  | 2000-2004   | 4     | 84.5                             | 2003              | Vital Registration                                                                                                                                   | 99.5             | 15.1                      |                                             |
| Macedonia  | 2005-2009   | 4     | 81.7                             | 2009              | Vital Registration                                                                                                                                   | 100.0            | 18.3                      |                                             |
| Macedonia  | 2010-2017   | 4     | 79.6                             | 2010              | Vital Registration                                                                                                                                   | 99.2             | 19.7                      |                                             |

**Appendix Table 8. Underlying indicators for percent well-certified for data source with maximum percent well certified in each 5-year time interval for 195 countries, 1980-2017**

| Country          | Time Window | Stars | Percent Well-Certified [PWC] (%) | Max PWC Data Year | Max PWC Data Source                                                                                          | Completeness (%) | Percent Major Garbage (%) | Verbal Autopsy Adjustment (None for VR) (%) |
|------------------|-------------|-------|----------------------------------|-------------------|--------------------------------------------------------------------------------------------------------------|------------------|---------------------------|---------------------------------------------|
| Madagascar       | 1980-1984   | 1     | 2.8                              | 1984              | Vital Registration                                                                                           | 4.9              | 42.4                      |                                             |
| Madagascar       | 1985-1989   | 1     | 3.5                              | 1986              | Vital Registration                                                                                           | 6.0              | 42.7                      |                                             |
| Madagascar       | 1990-1994   | 1     | 2.4                              | 1990              | Vital Registration                                                                                           | 4.1              | 40.9                      |                                             |
| Madagascar       | 1995-1999   | 1     | 2.4                              | 1995              | Vital Registration                                                                                           | 4.3              | 43.0                      |                                             |
| Madagascar       | 2000-2004   | 0     |                                  |                   |                                                                                                              |                  |                           |                                             |
| Madagascar       | 2005-2009   | 0     |                                  |                   |                                                                                                              |                  |                           |                                             |
| Madagascar       | 2010-2017   | 0     |                                  |                   |                                                                                                              |                  |                           |                                             |
| Malawi           | 1980-1984   | 0     |                                  |                   |                                                                                                              |                  |                           |                                             |
| Malawi           | 1985-1989   | 1     | 2.5                              | 1988              | Infant and second-year mortality in rural Malawi: causes and descriptive epidemiology                        |                  | 35.2                      | 3.8                                         |
| Malawi           | 1990-1994   | 0     |                                  |                   |                                                                                                              |                  |                           |                                             |
| Malawi           | 1995-1999   | 1     | 0.6                              | 1999              | Estimation of AIDS adult mortality by verbal autopsy in rural Malawi                                         |                  | 28.0                      | 0.8                                         |
| Malawi           | 2000-2004   | 1     | 2.5                              | 2004              | Adult mortality and probable cause of death in rural northern Malawi in the era of HIV treatment             |                  | 30.9                      | 3.6                                         |
| Malawi           | 2005-2009   | 1     | 4.5                              | 2008              | Rates and causes of death in Chiradzulu District, Malawi, 2008: a key informant study                        |                  | 30.0                      | 6.4                                         |
| Malawi           | 2010-2017   | 1     | 0.6                              | 2011              | Measuring causes of adult mortality in rural northern Malawi over a decade of change                         |                  | 84.2                      | 4.0                                         |
| Malaysia         | 1980-1984   | 3     | 46.9                             | 1980              | Vital Registration                                                                                           | 70.6             | 33.6                      |                                             |
| Malaysia         | 1985-1989   | 0     |                                  |                   |                                                                                                              |                  |                           |                                             |
| Malaysia         | 1990-1994   | 0     |                                  |                   |                                                                                                              |                  |                           |                                             |
| Malaysia         | 1995-1999   | 2     | 32.1                             | 1997              | Vital Registration                                                                                           | 46.0             | 30.2                      |                                             |
| Malaysia         | 2000-2004   | 3     | 37.3                             | 2004              | Vital Registration                                                                                           | 58.4             | 36.2                      |                                             |
| Malaysia         | 2005-2009   | 3     | 42.0                             | 2008              | Vital Registration                                                                                           | 62.4             | 32.6                      |                                             |
| Malaysia         | 2010-2017   | 3     | 40.2                             | 2014              | Vital Registration                                                                                           | 53.9             | 25.4                      |                                             |
| Maldives         | 1980-1984   | 0     |                                  |                   |                                                                                                              |                  |                           |                                             |
| Maldives         | 1985-1989   | 0     |                                  |                   |                                                                                                              |                  |                           |                                             |
| Maldives         | 1990-1994   | 0     |                                  |                   |                                                                                                              |                  |                           |                                             |
| Maldives         | 1995-1999   | 0     |                                  |                   |                                                                                                              |                  |                           |                                             |
| Maldives         | 2000-2004   | 3     | 44.0                             | 2002              | Vital Registration                                                                                           | 100.0            | 56.0                      |                                             |
| Maldives         | 2005-2009   | 3     | 46.6                             | 2008              | Vital Registration                                                                                           | 97.0             | 52.0                      |                                             |
| Maldives         | 2010-2017   | 3     | 60.1                             | 2011              | Vital Registration                                                                                           | 100.0            | 39.9                      |                                             |
| Mali             | 1980-1984   | 1     | 4.0                              | 1981              | Vital Registration                                                                                           | 7.4              | 45.8                      |                                             |
| Mali             | 1985-1989   | 0     |                                  |                   |                                                                                                              |                  |                           |                                             |
| Mali             | 1990-1994   | 1     | 0.1                              | 1990              | Assessment of maternal mortality and late maternal mortality among a cohort of pregnant women in Bamako, Mal |                  | 79.0                      | 0.3                                         |
| Mali             | 1995-1999   | 0     |                                  |                   |                                                                                                              |                  |                           |                                             |
| Mali             | 2000-2004   | 0     |                                  |                   |                                                                                                              |                  |                           |                                             |
| Mali             | 2005-2009   | 0     |                                  |                   |                                                                                                              |                  |                           |                                             |
| Mali             | 2010-2017   | 0     |                                  |                   |                                                                                                              |                  |                           |                                             |
| Malta            | 1980-1984   | 4     | 81.2                             | 1982              | Vital Registration                                                                                           | 100.0            | 18.8                      |                                             |
| Malta            | 1985-1989   | 5     | 86.3                             | 1989              | Vital Registration                                                                                           | 98.5             | 12.4                      |                                             |
| Malta            | 1990-1994   | 5     | 88.7                             | 1993              | Vital Registration                                                                                           | 100.0            | 11.3                      |                                             |
| Malta            | 1995-1999   | 5     | 90.0                             | 1997              | Vital Registration                                                                                           | 100.0            | 10.0                      |                                             |
| Malta            | 2000-2004   | 5     | 90.3                             | 2001              | Vital Registration                                                                                           | 99.1             | 8.9                       |                                             |
| Malta            | 2005-2009   | 5     | 92.8                             | 2008              | Vital Registration                                                                                           | 100.0            | 7.2                       |                                             |
| Malta            | 2010-2017   | 5     | 89.5                             | 2011              | Vital Registration                                                                                           | 99.6             | 10.1                      |                                             |
| Marshall Islands | 1980-1984   | 0     |                                  |                   |                                                                                                              |                  |                           |                                             |
| Marshall Islands | 1985-1989   | 0     |                                  |                   |                                                                                                              |                  |                           |                                             |
| Marshall Islands | 1990-1994   | 0     |                                  |                   |                                                                                                              |                  |                           |                                             |
| Marshall Islands | 1995-1999   | 0     |                                  |                   |                                                                                                              |                  |                           |                                             |
| Marshall Islands | 2000-2004   | 0     |                                  |                   |                                                                                                              |                  |                           |                                             |
| Marshall Islands | 2005-2009   | 0     |                                  |                   |                                                                                                              |                  |                           |                                             |
| Marshall Islands | 2010-2017   | 0     |                                  |                   |                                                                                                              |                  |                           |                                             |
| Mauritania       | 1980-1984   | 0     |                                  |                   |                                                                                                              |                  |                           |                                             |
| Mauritania       | 1985-1989   | 0     |                                  |                   |                                                                                                              |                  |                           |                                             |
| Mauritania       | 1990-1994   | 0     |                                  |                   |                                                                                                              |                  |                           |                                             |
| Mauritania       | 1995-1999   | 0     |                                  |                   |                                                                                                              |                  |                           |                                             |
| Mauritania       | 2000-2004   | 0     |                                  |                   |                                                                                                              |                  |                           |                                             |
| Mauritania       | 2005-2009   | 0     |                                  |                   |                                                                                                              |                  |                           |                                             |
| Mauritania       | 2010-2017   | 0     |                                  |                   |                                                                                                              |                  |                           |                                             |
| Mauritius        | 1980-1984   | 4     | 75.2                             | 1984              | Vital Registration                                                                                           | 100.0            | 24.8                      |                                             |
| Mauritius        | 1985-1989   | 4     | 79.4                             | 1988              | Vital Registration                                                                                           | 99.6             | 20.3                      |                                             |
| Mauritius        | 1990-1994   | 4     | 78.7                             | 1991              | Vital Registration                                                                                           | 100.0            | 21.3                      |                                             |
| Mauritius        | 1995-1999   | 4     | 78.2                             | 1998              | Vital Registration                                                                                           | 100.0            | 21.8                      |                                             |
| Mauritius        | 2000-2004   | 4     | 83.2                             | 2002              | Vital Registration                                                                                           | 100.0            | 16.8                      |                                             |
| Mauritius        | 2005-2009   | 5     | 85.1                             | 2007              | Vital Registration                                                                                           | 98.9             | 13.9                      |                                             |
| Mauritius        | 2010-2017   | 5     | 86.3                             | 2014              | Vital Registration                                                                                           | 98.8             | 12.6                      |                                             |
| Mexico           | 1980-1984   | 4     | 68.3                             | 1984              | Vital Registration                                                                                           | 87.3             | 21.8                      |                                             |
| Mexico           | 1985-1989   | 4     | 77.7                             | 1989              | Vital Registration                                                                                           | 93.9             | 17.3                      |                                             |
| Mexico           | 1990-1994   | 4     | 78.5                             | 1990              | Vital Registration                                                                                           | 94.3             | 16.8                      |                                             |
| Mexico           | 1995-1999   | 4     | 79.7                             | 1999              | Vital Registration                                                                                           | 91.8             | 13.2                      |                                             |
| Mexico           | 2000-2004   | 4     | 82.4                             | 2004              | Vital Registration                                                                                           | 93.8             | 12.2                      |                                             |
| Mexico           | 2005-2009   | 4     | 84.1                             | 2007              | Vital Registration                                                                                           | 97.3             | 13.5                      |                                             |
| Mexico           | 2010-2017   | 5     | 88.1                             | 2014              | Vital Registration                                                                                           | 100.0            | 11.9                      |                                             |
| Moldova          | 1980-1984   | 5     | 88.8                             | 1981              | Vital Registration                                                                                           | 100.0            | 11.2                      |                                             |
| Moldova          | 1985-1989   | 5     | 91.2                             | 1985              | Vital Registration                                                                                           | 100.0            | 8.8                       |                                             |

**Appendix Table 8. Underlying indicators for percent well-certified for data source with maximum percent well certified in each 5-year time interval for 195 countries, 1980-2017**

| Country     | Time Window | Stars | Percent Well-Certified [PWC] (%) | Max PWC Data Year | Max PWC Data Source                                                                                                                        | Completeness (%) | Percent Major Garbage (%) | Verbal Autopsy Adjustment (None for VR) (%) |
|-------------|-------------|-------|----------------------------------|-------------------|--------------------------------------------------------------------------------------------------------------------------------------------|------------------|---------------------------|---------------------------------------------|
| Moldova     | 1990-1994   | 4     | 81.9                             | 1991              | Vital Registration                                                                                                                         | 100.0            | 18.1                      |                                             |
| Moldova     | 1995-1999   | 5     | 87.8                             | 1996              | Vital Registration                                                                                                                         | 98.4             | 10.8                      |                                             |
| Moldova     | 2000-2004   | 5     | 85.0                             | 2003              | Vital Registration                                                                                                                         | 88.1             | 3.5                       |                                             |
| Moldova     | 2005-2009   | 4     | 83.5                             | 2005              | Vital Registration                                                                                                                         | 86.2             | 3.2                       |                                             |
| Moldova     | 2010-2017   | 4     | 83.7                             | 2010              | Vital Registration                                                                                                                         | 86.5             | 3.2                       |                                             |
| Mongolia    | 1980-1984   | 0     |                                  |                   |                                                                                                                                            |                  |                           |                                             |
| Mongolia    | 1985-1989   | 0     |                                  |                   |                                                                                                                                            |                  |                           |                                             |
| Mongolia    | 1990-1994   | 3     | 61.2                             | 1994              | Vital Registration                                                                                                                         | 77.5             | 21.0                      |                                             |
| Mongolia    | 1995-1999   | 0     |                                  |                   |                                                                                                                                            |                  |                           |                                             |
| Mongolia    | 2000-2004   | 2     | 19.6                             | 2004              | Vital Registration                                                                                                                         | 81.1             | 75.8                      |                                             |
| Mongolia    | 2005-2009   | 2     | 21.4                             | 2008              | Vital Registration                                                                                                                         | 80.6             | 73.4                      |                                             |
| Mongolia    | 2010-2017   | 4     | 83.4                             | 2010              | Vital Registration                                                                                                                         | 89.1             | 6.3                       |                                             |
| Montenegro  | 1980-1984   | 0     |                                  |                   |                                                                                                                                            |                  |                           |                                             |
| Montenegro  | 1985-1989   | 0     |                                  |                   |                                                                                                                                            |                  |                           |                                             |
| Montenegro  | 1990-1994   | 0     |                                  |                   |                                                                                                                                            |                  |                           |                                             |
| Montenegro  | 1995-1999   | 0     |                                  |                   |                                                                                                                                            |                  |                           |                                             |
| Montenegro  | 2000-2004   | 4     | 69.2                             | 2004              | Vital Registration                                                                                                                         | 98.0             | 29.4                      |                                             |
| Montenegro  | 2005-2009   | 4     | 69.2                             | 2009              | Vital Registration                                                                                                                         | 98.8             | 29.9                      |                                             |
| Montenegro  | 2010-2017   | 0     |                                  |                   |                                                                                                                                            |                  |                           |                                             |
| Morocco     | 1980-1984   | 0     |                                  |                   |                                                                                                                                            |                  |                           |                                             |
| Morocco     | 1985-1989   | 2     | 15.4                             | 1988              | Morocco National Survey on Causes and Circumstances of Infant and Child Deaths 1988-1989                                                   |                  | 25.7                      | 20.7                                        |
| Morocco     | 1990-1994   | 0     |                                  |                   |                                                                                                                                            |                  |                           |                                             |
| Morocco     | 1995-1999   | 0     |                                  |                   |                                                                                                                                            |                  |                           |                                             |
| Morocco     | 2000-2004   | 2     | 10.2                             | 2001              | Vital Registration                                                                                                                         | 21.7             | 53.0                      |                                             |
| Morocco     | 2005-2009   | 2     | 33.3                             | 2005              | Vital Registration                                                                                                                         | 73.5             | 54.7                      |                                             |
| Morocco     | 2010-2017   | 2     | 13.7                             | 2014              | Vital Registration                                                                                                                         | 26.8             | 49.0                      |                                             |
| Mozambique  | 1980-1984   | 0     |                                  |                   |                                                                                                                                            |                  |                           |                                             |
| Mozambique  | 1985-1989   | 0     |                                  |                   |                                                                                                                                            |                  |                           |                                             |
| Mozambique  | 1990-1994   | 0     |                                  |                   |                                                                                                                                            |                  |                           |                                             |
| Mozambique  | 1995-1999   | 1     | 0.1                              | 1996              | Quality of registration of maternal deaths in Mozambique: a community-based study in rural and urban area                                  |                  | 81.3                      | 0.4                                         |
| Mozambique  | 2000-2004   | 2     | 16.2                             | 2001              | Vital Registration                                                                                                                         | 20.5             | 21.0                      |                                             |
| Mozambique  | 2005-2009   | 3     | 63.4                             | 2007              | Mozambique National Survey on the Causes of Death 2007-2008                                                                                |                  | 0.9                       | 64.0                                        |
| Mozambique  | 2010-2017   | 0     |                                  |                   |                                                                                                                                            |                  |                           |                                             |
| Myanmar     | 1980-1984   | 0     |                                  |                   |                                                                                                                                            |                  |                           |                                             |
| Myanmar     | 1985-1989   | 0     |                                  |                   |                                                                                                                                            |                  |                           |                                             |
| Myanmar     | 1990-1994   | 0     |                                  |                   |                                                                                                                                            |                  |                           |                                             |
| Myanmar     | 1995-1999   | 0     |                                  |                   |                                                                                                                                            |                  |                           |                                             |
| Myanmar     | 2000-2004   | 0     |                                  |                   |                                                                                                                                            |                  |                           |                                             |
| Myanmar     | 2005-2009   | 1     | 2.9                              | 2007              | Cause of Death Verification Study in Myanmar                                                                                               |                  | 54.3                      | 6.3                                         |
| Myanmar     | 2010-2017   | 3     | 49.5                             | 2016              | Myanmar National Mortality Survey 2016                                                                                                     |                  | 22.6                      | 64.0                                        |
| Namibia     | 1980-1984   | 0     |                                  |                   |                                                                                                                                            |                  |                           |                                             |
| Namibia     | 1985-1989   | 0     |                                  |                   |                                                                                                                                            |                  |                           |                                             |
| Namibia     | 1990-1994   | 0     |                                  |                   |                                                                                                                                            |                  |                           |                                             |
| Namibia     | 1995-1999   | 0     |                                  |                   |                                                                                                                                            |                  |                           |                                             |
| Namibia     | 2000-2004   | 0     |                                  |                   |                                                                                                                                            |                  |                           |                                             |
| Namibia     | 2005-2009   | 0     |                                  |                   |                                                                                                                                            |                  |                           |                                             |
| Namibia     | 2010-2017   | 0     |                                  |                   |                                                                                                                                            |                  |                           |                                             |
| Nepal       | 1980-1984   | 1     | 2.8                              | 1984              | Impact of a pilot acute respiratory infection (ARI) control programme in a rural community of the hill region of Nepal                     |                  | 17.2                      | 3.4                                         |
| Nepal       | 1985-1989   | 1     | 2.6                              | 1987              | Reduction in total under-five mortality in western Nepal through community-based antimicrobial treatment of pneumonia                      |                  | 19.2                      | 3.2                                         |
| Nepal       | 1990-1994   | 0     |                                  |                   |                                                                                                                                            |                  |                           |                                             |
| Nepal       | 1995-1999   | 1     | 0.6                              | 1999              | Evaluation of neonatal verbal autopsy using physician review versus algorithm-based cause-of-death assignment in rural Nepal               |                  | 45.6                      | 1.1                                         |
| Nepal       | 2000-2004   | 1     | 0.6                              | 2003              | Effect of daily zinc supplementation on child mortality in southern Nepal: a community-based, cluster randomised, placebo-controlled trial |                  | 31.8                      | 0.9                                         |
| Nepal       | 2005-2009   | 1     | 9.2                              | 2006              | Nepal Demographic and Health Survey 2006                                                                                                   |                  | 40.3                      | 15.4                                        |
| Nepal       | 2010-2017   | 0     |                                  |                   |                                                                                                                                            |                  |                           |                                             |
| Netherlands | 1980-1984   | 5     | 88.5                             | 1981              | Vital Registration                                                                                                                         | 100.0            | 11.5                      |                                             |
| Netherlands | 1985-1989   | 5     | 86.7                             | 1988              | Vital Registration                                                                                                                         | 100.0            | 13.3                      |                                             |
| Netherlands | 1990-1994   | 5     | 85.2                             | 1990              | Vital Registration                                                                                                                         | 100.0            | 14.8                      |                                             |
| Netherlands | 1995-1999   | 4     | 83.9                             | 1996              | Vital Registration                                                                                                                         | 100.0            | 16.1                      |                                             |
| Netherlands | 2000-2004   | 4     | 82.3                             | 2003              | Vital Registration                                                                                                                         | 100.0            | 17.7                      |                                             |
| Netherlands | 2005-2009   | 4     | 83.2                             | 2006              | Vital Registration                                                                                                                         | 100.0            | 16.8                      |                                             |
| Netherlands | 2010-2017   | 4     | 83.3                             | 2012              | Vital Registration                                                                                                                         | 100.0            | 16.7                      |                                             |
| New Zealand | 1980-1984   | 5     | 95.3                             | 1980              | Vital Registration                                                                                                                         | 100.0            | 4.7                       |                                             |
| New Zealand | 1985-1989   | 5     | 95.2                             | 1985              | Vital Registration                                                                                                                         | 100.0            | 4.8                       |                                             |
| New Zealand | 1990-1994   | 5     | 95.1                             | 1994              | Vital Registration                                                                                                                         | 100.0            | 4.9                       |                                             |
| New Zealand | 1995-1999   | 5     | 96.8                             | 1999              | Vital Registration                                                                                                                         | 100.0            | 3.2                       |                                             |
| New Zealand | 2000-2004   | 5     | 96.4                             | 2004              | Vital Registration                                                                                                                         | 100.0            | 3.6                       |                                             |
| New Zealand | 2005-2009   | 5     | 96.3                             | 2006              | Vital Registration                                                                                                                         | 100.0            | 3.7                       |                                             |
| New Zealand | 2010-2017   | 5     | 95.7                             | 2012              | Vital Registration                                                                                                                         | 100.0            | 4.3                       |                                             |
| Nicaragua   | 1980-1984   | 0     |                                  |                   |                                                                                                                                            |                  |                           |                                             |
| Nicaragua   | 1985-1989   | 3     | 54.3                             | 1988              | Vital Registration                                                                                                                         | 68.7             | 20.9                      |                                             |

**Appendix Table 8. Underlying indicators for percent well-certified for data source with maximum percent well certified in each 5-year time interval for 195 countries, 1980-2017**

| Country                  | Time Window | Stars | Percent Well-Certified [PWC] (%) | Max PWC Data Year | Max PWC Data Source                                                                                                                                                        | Completeness (%) | Percent Major Garbage (%) | Verbal Autopsy Adjustment (None for VR) (%) |
|--------------------------|-------------|-------|----------------------------------|-------------------|----------------------------------------------------------------------------------------------------------------------------------------------------------------------------|------------------|---------------------------|---------------------------------------------|
| Nicaragua                | 1990-1994   | 3     | 56.9                             | 1990              | Vital Registration                                                                                                                                                         | 71.2             | 20.1                      |                                             |
| Nicaragua                | 1995-1999   | 4     | 69.0                             | 1998              | Vital Registration                                                                                                                                                         | 81.6             | 15.4                      |                                             |
| Nicaragua                | 2000-2004   | 4     | 77.2                             | 2004              | Vital Registration                                                                                                                                                         | 87.4             | 11.7                      |                                             |
| Nicaragua                | 2005-2009   | 4     | 84.9                             | 2009              | Vital Registration                                                                                                                                                         | 95.5             | 11.2                      |                                             |
| Nicaragua                | 2010-2017   | 5     | 90.5                             | 2013              | Vital Registration                                                                                                                                                         | 100.0            | 9.5                       |                                             |
| Niger                    | 1980-1984   | 0     |                                  |                   |                                                                                                                                                                            |                  |                           |                                             |
| Niger                    | 1985-1989   | 0     |                                  |                   |                                                                                                                                                                            |                  |                           |                                             |
| Niger                    | 1990-1994   | 0     |                                  |                   |                                                                                                                                                                            |                  |                           |                                             |
| Niger                    | 1995-1999   | 0     |                                  |                   |                                                                                                                                                                            |                  |                           |                                             |
| Niger                    | 2000-2004   | 0     |                                  |                   |                                                                                                                                                                            |                  |                           |                                             |
| Niger                    | 2005-2009   | 3     | 35.7                             | 2008              | Direct estimates of national neonatal and child cause-specific mortality proportions in Niger by expert algorithm and physician-coded analysis of verbal autopsy interview |                  | 8.9                       | 39.1                                        |
| Niger                    | 2010-2017   | 0     |                                  |                   |                                                                                                                                                                            |                  |                           |                                             |
| Nigeria                  | 1980-1984   | 0     |                                  |                   |                                                                                                                                                                            |                  |                           |                                             |
| Nigeria                  | 1985-1989   | 0     |                                  |                   |                                                                                                                                                                            |                  |                           |                                             |
| Nigeria                  | 1990-1994   | 1     | 3.3                              | 1991              | Community-based surveillance of paediatric deaths in Cross River State, Nigeria                                                                                            |                  | 9.7                       | 3.7                                         |
| Nigeria                  | 1995-1999   | 0     |                                  |                   |                                                                                                                                                                            |                  |                           |                                             |
| Nigeria                  | 2000-2004   | 0     |                                  |                   |                                                                                                                                                                            |                  |                           |                                             |
| Nigeria                  | 2005-2009   | 1     | 0.1                              | 2007              | Vital Registration                                                                                                                                                         | 1.7              | 91.6                      |                                             |
| Nigeria                  | 2010-2017   | 2     | 32.3                             | 2014              | Direct estimates of cause-specific mortality fractions and rates of under-five deaths in the northern and southern regions of Nigeria by verbal autopsy interview          |                  | 5.5                       | 34.2                                        |
| North Korea              | 1980-1984   | 0     |                                  |                   |                                                                                                                                                                            |                  |                           |                                             |
| North Korea              | 1985-1989   | 0     |                                  |                   |                                                                                                                                                                            |                  |                           |                                             |
| North Korea              | 1990-1994   | 0     |                                  |                   |                                                                                                                                                                            |                  |                           |                                             |
| North Korea              | 1995-1999   | 0     |                                  |                   |                                                                                                                                                                            |                  |                           |                                             |
| North Korea              | 2000-2004   | 0     |                                  |                   |                                                                                                                                                                            |                  |                           |                                             |
| North Korea              | 2005-2009   | 0     |                                  |                   |                                                                                                                                                                            |                  |                           |                                             |
| North Korea              | 2010-2017   | 0     |                                  |                   |                                                                                                                                                                            |                  |                           |                                             |
| Northern Mariana Islands | 1980-1984   | 0     |                                  |                   |                                                                                                                                                                            |                  |                           |                                             |
| Northern Mariana Islands | 1985-1989   | 0     |                                  |                   |                                                                                                                                                                            |                  |                           |                                             |
| Northern Mariana Islands | 1990-1994   | 0     |                                  |                   |                                                                                                                                                                            |                  |                           |                                             |
| Northern Mariana Islands | 1995-1999   | 4     | 75.3                             | 1998              | Vital Registration                                                                                                                                                         | 100.0            | 24.7                      |                                             |
| Northern Mariana Islands | 2000-2004   | 4     | 71.4                             | 2004              | Vital Registration                                                                                                                                                         | 90.8             | 21.3                      |                                             |
| Northern Mariana Islands | 2005-2009   | 4     | 80.3                             | 2009              | Vital Registration                                                                                                                                                         | 100.0            | 19.7                      |                                             |
| Northern Mariana Islands | 2010-2017   | 4     | 82.5                             | 2015              | Vital Registration                                                                                                                                                         | 93.9             | 12.1                      |                                             |
| Norway                   | 1980-1984   | 5     | 88.6                             | 1984              | Vital Registration                                                                                                                                                         | 99.3             | 10.8                      |                                             |
| Norway                   | 1985-1989   | 5     | 89.4                             | 1985              | Vital Registration                                                                                                                                                         | 100.0            | 10.6                      |                                             |
| Norway                   | 1990-1994   | 5     | 88.6                             | 1990              | Vital Registration                                                                                                                                                         | 100.0            | 11.4                      |                                             |
| Norway                   | 1995-1999   | 5     | 88.5                             | 1997              | Vital Registration                                                                                                                                                         | 100.0            | 11.5                      |                                             |
| Norway                   | 2000-2004   | 5     | 86.3                             | 2001              | Vital Registration                                                                                                                                                         | 99.8             | 13.5                      |                                             |
| Norway                   | 2005-2009   | 4     | 84.2                             | 2006              | Vital Registration                                                                                                                                                         | 100.0            | 15.7                      |                                             |
| Norway                   | 2010-2017   | 4     | 84.1                             | 2015              | Vital Registration                                                                                                                                                         | 100.0            | 15.9                      |                                             |
| Oman                     | 1980-1984   | 0     |                                  |                   |                                                                                                                                                                            |                  |                           |                                             |
| Oman                     | 1985-1989   | 0     |                                  |                   |                                                                                                                                                                            |                  |                           |                                             |
| Oman                     | 1990-1994   | 0     |                                  |                   |                                                                                                                                                                            |                  |                           |                                             |
| Oman                     | 1995-1999   | 0     |                                  |                   |                                                                                                                                                                            |                  |                           |                                             |
| Oman                     | 2000-2004   | 0     |                                  |                   |                                                                                                                                                                            |                  |                           |                                             |
| Oman                     | 2005-2009   | 4     | 73.2                             | 2007              | Vital Registration                                                                                                                                                         | 87.6             | 16.5                      |                                             |
| Oman                     | 2010-2017   | 2     | 34.4                             | 2014              | Vital Registration                                                                                                                                                         | 78.6             | 56.2                      |                                             |
| Pakistan                 | 1980-1984   | 0     |                                  |                   |                                                                                                                                                                            |                  |                           |                                             |
| Pakistan                 | 1985-1989   | 1     | 2.8                              | 1986              | Acute respiratory infections in children: a case management intervention in Abbottabad District, Pakistan                                                                  |                  | 13.0                      | 3.2                                         |
| Pakistan                 | 1990-1994   | 1     | 1.6                              | 1994              | Time to focus child survival programmes on the newborn: assessment of levels and causes of infant mortality in rural Pakistan                                              |                  | 19.9                      | 2.0                                         |
| Pakistan                 | 1995-1999   | 0     |                                  |                   |                                                                                                                                                                            |                  |                           |                                             |
| Pakistan                 | 2000-2004   | 1     | 1.5                              | 2003              | Impact of a community-based perinatal and newborn preventive care package on perinatal and neonatal mortality in a remote mountainous district in Northern Pakistan        |                  | 0.0                       | 1.5                                         |
| Pakistan                 | 2005-2009   | 2     | 17.8                             | 2006              | Pakistan Demographic and Health Survey 2006-2007                                                                                                                           |                  | 32.9                      | 26.6                                        |
| Pakistan                 | 2010-2017   | 1     | 1.9                              | 2010              | Cause of Death in under 5 Children in a Demographic Surveillance Site in Pakistan                                                                                          |                  | 19.1                      | 2.4                                         |
| Palestine                | 1980-1984   | 0     |                                  |                   |                                                                                                                                                                            |                  |                           |                                             |
| Palestine                | 1985-1989   | 0     |                                  |                   |                                                                                                                                                                            |                  |                           |                                             |
| Palestine                | 1990-1994   | 0     |                                  |                   |                                                                                                                                                                            |                  |                           |                                             |
| Palestine                | 1995-1999   | 2     | 29.7                             | 1999              | Vital Registration                                                                                                                                                         | 48.2             | 38.3                      |                                             |
| Palestine                | 2000-2004   | 2     | 32.2                             | 2004              | Vital Registration                                                                                                                                                         | 48.1             | 33.1                      |                                             |
| Palestine                | 2005-2009   | 2     | 34.2                             | 2009              | Vital Registration                                                                                                                                                         | 49.5             | 30.9                      |                                             |
| Palestine                | 2010-2017   | 4     | 74.1                             | 2014              | Vital Registration                                                                                                                                                         | 100.0            | 25.9                      |                                             |
| Panama                   | 1980-1984   | 4     | 72.3                             | 1983              | Vital Registration                                                                                                                                                         | 97.3             | 25.7                      |                                             |
| Panama                   | 1985-1989   | 4     | 75.3                             | 1987              | Vital Registration                                                                                                                                                         | 97.3             | 22.6                      |                                             |
| Panama                   | 1990-1994   | 0     |                                  |                   |                                                                                                                                                                            |                  |                           |                                             |
| Panama                   | 1995-1999   | 4     | 83.5                             | 1999              | Vital Registration                                                                                                                                                         | 100.0            | 16.5                      |                                             |
| Panama                   | 2000-2004   | 5     | 86.6                             | 2002              | Vital Registration                                                                                                                                                         | 100.0            | 13.4                      |                                             |
| Panama                   | 2005-2009   | 5     | 86.3                             | 2007              | Vital Registration                                                                                                                                                         | 100.0            | 13.7                      |                                             |
| Panama                   | 2010-2017   | 4     | 84.0                             | 2014              | Vital Registration                                                                                                                                                         | 100.0            | 16.0                      |                                             |

**Appendix Table 8. Underlying indicators for percent well-certified for data source with maximum percent well certified in each 5-year time interval for 195 countries, 1980-2017**

| Country            | Time Window | Stars | Percent Well-Certified [PWC] (%) | Max PWC Data Year | Max PWC Data Source                                                                                                                                                      | Completeness (%) | Percent Major Garbage (%) | Verbal Autopsy Adjustment (None for VR) (%) |
|--------------------|-------------|-------|----------------------------------|-------------------|--------------------------------------------------------------------------------------------------------------------------------------------------------------------------|------------------|---------------------------|---------------------------------------------|
| Papua New Guinea   | 1980-1984   | 1     | 9.4                              | 1980              | Vital Registration<br>Mortality rates and the utilization of health services during terminal illness in the Asaro Valley, Eastern Highlands Province<br>Papua New Guinea | 11.4             | 17.4                      | 6.4                                         |
| Papua New Guinea   | 1985-1989   | 1     | 3.4                              | 1985              |                                                                                                                                                                          |                  |                           |                                             |
| Papua New Guinea   | 1990-1994   | 0     |                                  |                   |                                                                                                                                                                          |                  |                           |                                             |
| Papua New Guinea   | 1995-1999   | 0     |                                  |                   |                                                                                                                                                                          |                  |                           |                                             |
| Papua New Guinea   | 2000-2004   | 0     |                                  |                   |                                                                                                                                                                          |                  |                           |                                             |
| Papua New Guinea   | 2005-2009   | 0     |                                  |                   |                                                                                                                                                                          |                  |                           |                                             |
| Papua New Guinea   | 2010-2017   | 2     | 28.8                             | 2013              | The epidemiological transition in Papua New Guinea: new evidence from verbal autopsy studies                                                                             |                  | 53.7                      | 62.3                                        |
| Paraguay           | 1980-1984   | 3     | 51.3                             | 1980              | Vital Registration                                                                                                                                                       | 79.3             | 35.4                      |                                             |
| Paraguay           | 1985-1989   | 3     | 51.2                             | 1989              | Vital Registration                                                                                                                                                       | 76.3             | 32.9                      |                                             |
| Paraguay           | 1990-1994   | 3     | 57.2                             | 1994              | Vital Registration                                                                                                                                                       | 77.1             | 25.8                      |                                             |
| Paraguay           | 1995-1999   | 3     | 62.7                             | 1996              | Vital Registration                                                                                                                                                       | 84.9             | 26.1                      |                                             |
| Paraguay           | 2000-2004   | 3     | 63.6                             | 2004              | Vital Registration                                                                                                                                                       | 88.3             | 27.9                      |                                             |
| Paraguay           | 2005-2009   | 4     | 68.8                             | 2009              | Vital Registration                                                                                                                                                       | 90.9             | 24.3                      |                                             |
| Paraguay           | 2010-2017   | 4     | 74.0                             | 2013              | Vital Registration                                                                                                                                                       | 93.6             | 21.0                      |                                             |
| Peru               | 1980-1984   | 3     | 54.9                             | 1980              | Vital Registration                                                                                                                                                       | 70.4             | 21.9                      |                                             |
| Peru               | 1985-1989   | 3     | 36.1                             | 1989              | Vital Registration                                                                                                                                                       | 68.9             | 47.7                      |                                             |
| Peru               | 1990-1994   | 3     | 37.2                             | 1992              | Vital Registration                                                                                                                                                       | 68.0             | 45.3                      |                                             |
| Peru               | 1995-1999   | 3     | 51.1                             | 1999              | Vital Registration                                                                                                                                                       | 79.6             | 35.8                      |                                             |
| Peru               | 2000-2004   | 3     | 63.3                             | 2004              | Vital Registration                                                                                                                                                       | 90.4             | 29.9                      |                                             |
| Peru               | 2005-2009   | 4     | 65.4                             | 2007              | Vital Registration                                                                                                                                                       | 86.4             | 24.3                      |                                             |
| Peru               | 2010-2017   | 4     | 65.9                             | 2015              | Vital Registration                                                                                                                                                       | 82.8             | 20.4                      |                                             |
| Philippines        | 1980-1984   | 4     | 68.2                             | 1983              | Vital Registration                                                                                                                                                       | 91.0             | 23.1                      |                                             |
| Philippines        | 1985-1989   | 4     | 71.1                             | 1985              | Vital Registration                                                                                                                                                       | 90.2             | 21.2                      |                                             |
| Philippines        | 1990-1994   | 4     | 65.9                             | 1990              | Vital Registration                                                                                                                                                       | 85.5             | 22.9                      |                                             |
| Philippines        | 1995-1999   | 4     | 68.6                             | 1998              | Vital Registration                                                                                                                                                       | 87.9             | 21.9                      |                                             |
| Philippines        | 2000-2004   | 4     | 74.3                             | 2002              | Vital Registration                                                                                                                                                       | 87.1             | 14.7                      |                                             |
| Philippines        | 2005-2009   | 4     | 74.1                             | 2009              | Vital Registration                                                                                                                                                       | 87.3             | 15.1                      |                                             |
| Philippines        | 2010-2017   | 4     | 74.8                             | 2015              | Vital Registration                                                                                                                                                       | 87.9             | 14.9                      |                                             |
| Poland             | 1980-1984   | 3     | 61.8                             | 1981              | Vital Registration                                                                                                                                                       | 99.4             | 37.8                      |                                             |
| Poland             | 1985-1989   | 3     | 59.5                             | 1988              | Vital Registration                                                                                                                                                       | 100.0            | 40.5                      |                                             |
| Poland             | 1990-1994   | 3     | 59.9                             | 1994              | Vital Registration                                                                                                                                                       | 100.0            | 40.1                      |                                             |
| Poland             | 1995-1999   | 4     | 71.6                             | 1999              | Vital Registration                                                                                                                                                       | 99.9             | 28.4                      |                                             |
| Poland             | 2000-2004   | 4     | 73.7                             | 2002              | Vital Registration                                                                                                                                                       | 99.3             | 25.8                      |                                             |
| Poland             | 2005-2009   | 4     | 73.5                             | 2005              | Vital Registration                                                                                                                                                       | 99.9             | 26.4                      |                                             |
| Poland             | 2010-2017   | 4     | 72.6                             | 2011              | Vital Registration                                                                                                                                                       | 99.8             | 27.2                      |                                             |
| Portugal           | 1980-1984   | 4     | 76.9                             | 1984              | Vital Registration                                                                                                                                                       | 100.0            | 23.1                      |                                             |
| Portugal           | 1985-1989   | 4     | 77.1                             | 1985              | Vital Registration                                                                                                                                                       | 100.0            | 22.9                      |                                             |
| Portugal           | 1990-1994   | 4     | 76.3                             | 1991              | Vital Registration                                                                                                                                                       | 100.0            | 23.7                      |                                             |
| Portugal           | 1995-1999   | 4     | 76.2                             | 1995              | Vital Registration                                                                                                                                                       | 100.0            | 23.8                      |                                             |
| Portugal           | 2000-2004   | 4     | 79.1                             | 2002              | Vital Registration                                                                                                                                                       | 100.0            | 20.9                      |                                             |
| Portugal           | 2005-2009   | 4     | 77.7                             | 2009              | Vital Registration                                                                                                                                                       | 100.0            | 22.3                      |                                             |
| Portugal           | 2010-2017   | 4     | 80.1                             | 2014              | Vital Registration                                                                                                                                                       | 97.9             | 18.2                      |                                             |
| Puerto Rico        | 1980-1984   | 4     | 78.6                             | 1981              | Vital Registration                                                                                                                                                       | 100.0            | 21.4                      |                                             |
| Puerto Rico        | 1985-1989   | 4     | 76.7                             | 1989              | Vital Registration                                                                                                                                                       | 100.0            | 23.3                      |                                             |
| Puerto Rico        | 1990-1994   | 4     | 83.9                             | 1994              | Vital Registration                                                                                                                                                       | 100.0            | 16.1                      |                                             |
| Puerto Rico        | 1995-1999   | 4     | 83.2                             | 1996              | Vital Registration                                                                                                                                                       | 100.0            | 16.8                      |                                             |
| Puerto Rico        | 2000-2004   | 4     | 83.6                             | 2004              | Vital Registration                                                                                                                                                       | 100.0            | 16.4                      |                                             |
| Puerto Rico        | 2005-2009   | 4     | 83.6                             | 2008              | Vital Registration                                                                                                                                                       | 100.0            | 16.4                      |                                             |
| Puerto Rico        | 2010-2017   | 4     | 84.4                             | 2012              | Vital Registration                                                                                                                                                       | 100.0            | 15.6                      |                                             |
| Qatar              | 1980-1984   | 2     | 14.7                             | 1984              | Vital Registration                                                                                                                                                       | 65.6             | 77.6                      |                                             |
| Qatar              | 1985-1989   | 2     | 18.9                             | 1985              | Vital Registration                                                                                                                                                       | 77.9             | 75.7                      |                                             |
| Qatar              | 1990-1994   | 0     |                                  |                   |                                                                                                                                                                          |                  |                           |                                             |
| Qatar              | 1995-1999   | 3     | 55.1                             | 1995              | Vital Registration                                                                                                                                                       | 78.9             | 30.1                      |                                             |
| Qatar              | 2000-2004   | 3     | 56.3                             | 2001              | Vital Registration                                                                                                                                                       | 87.0             | 35.3                      |                                             |
| Qatar              | 2005-2009   | 3     | 64.9                             | 2006              | Vital Registration                                                                                                                                                       | 95.1             | 31.8                      |                                             |
| Qatar              | 2010-2017   | 3     | 46.1                             | 2010              | Vital Registration                                                                                                                                                       | 74.2             | 37.8                      |                                             |
| Romania            | 1980-1984   | 4     | 76.0                             | 1980              | Vital Registration                                                                                                                                                       | 100.0            | 24.0                      |                                             |
| Romania            | 1985-1989   | 4     | 78.0                             | 1989              | Vital Registration                                                                                                                                                       | 100.0            | 22.0                      |                                             |
| Romania            | 1990-1994   | 4     | 83.3                             | 1994              | Vital Registration                                                                                                                                                       | 100.0            | 16.7                      |                                             |
| Romania            | 1995-1999   | 4     | 84.8                             | 1999              | Vital Registration                                                                                                                                                       | 100.0            | 15.2                      |                                             |
| Romania            | 2000-2004   | 5     | 85.9                             | 2004              | Vital Registration                                                                                                                                                       | 99.8             | 13.9                      |                                             |
| Romania            | 2005-2009   | 5     | 86.2                             | 2006              | Vital Registration                                                                                                                                                       | 100.0            | 13.8                      |                                             |
| Romania            | 2010-2017   | 5     | 85.4                             | 2010              | Vital Registration                                                                                                                                                       | 100.0            | 14.6                      |                                             |
| Russian Federation | 1980-1984   | 5     | 93.0                             | 1980              | Vital Registration                                                                                                                                                       | 100.0            | 7.0                       |                                             |
| Russian Federation | 1985-1989   | 5     | 87.3                             | 1989              | Vital Registration                                                                                                                                                       | 94.7             | 7.8                       |                                             |
| Russian Federation | 1990-1994   | 5     | 90.7                             | 1990              | Vital Registration                                                                                                                                                       | 100.0            | 9.3                       |                                             |
| Russian Federation | 1995-1999   | 5     | 87.6                             | 1998              | Vital Registration                                                                                                                                                       | 100.0            | 12.4                      |                                             |
| Russian Federation | 2000-2004   | 5     | 88.0                             | 2004              | Vital Registration                                                                                                                                                       | 100.0            | 12.0                      |                                             |
| Russian Federation | 2005-2009   | 5     | 89.3                             | 2009              | Vital Registration                                                                                                                                                       | 100.0            | 10.7                      |                                             |
| Russian Federation | 2010-2017   | 5     | 88.8                             | 2010              | Vital Registration                                                                                                                                                       | 100.0            | 11.2                      |                                             |
| Rwanda             | 1980-1984   | 0     |                                  |                   |                                                                                                                                                                          |                  |                           |                                             |
| Rwanda             | 1985-1989   | 0     |                                  |                   |                                                                                                                                                                          |                  |                           |                                             |
| Rwanda             | 1990-1994   | 0     |                                  |                   |                                                                                                                                                                          |                  |                           |                                             |

**Appendix Table 8. Underlying indicators for percent well-certified for data source with maximum percent well certified in each 5-year time interval for 195 countries, 1980-2017**

| Country                          | Time Window | Stars | Percent Well-Certified [PWC] (%) | Max PWC Data Year | Max PWC Data Source                                                                                                                               | Completeness (%) | Percent Major Garbage (%) | Verbal Autopsy Adjustment (None for VR) (%) |
|----------------------------------|-------------|-------|----------------------------------|-------------------|---------------------------------------------------------------------------------------------------------------------------------------------------|------------------|---------------------------|---------------------------------------------|
| Rwanda                           | 1995-1999   | 0     |                                  |                   |                                                                                                                                                   |                  |                           |                                             |
| Rwanda                           | 2000-2004   | 0     |                                  |                   |                                                                                                                                                   |                  |                           |                                             |
| Rwanda                           | 2005-2009   | 2     | 22.6                             | 2007              | Rwanda Child Verbal Autopsy Study 2008                                                                                                            |                  | 11.6                      | 25.5                                        |
| Rwanda                           | 2010-2017   | 0     |                                  |                   |                                                                                                                                                   |                  |                           |                                             |
| Saint Lucia                      | 1980-1984   | 4     | 66.8                             | 1983              | Vital Registration                                                                                                                                | 94.7             | 29.5                      |                                             |
| Saint Lucia                      | 1985-1989   | 4     | 68.2                             | 1987              | Vital Registration                                                                                                                                | 100.0            | 31.8                      |                                             |
| Saint Lucia                      | 1990-1994   | 4     | 73.2                             | 1994              | Vital Registration                                                                                                                                | 100.0            | 26.8                      |                                             |
| Saint Lucia                      | 1995-1999   | 4     | 72.1                             | 1997              | Vital Registration                                                                                                                                | 100.0            | 27.9                      |                                             |
| Saint Lucia                      | 2000-2004   | 4     | 80.0                             | 2001              | Vital Registration                                                                                                                                | 100.0            | 20.0                      |                                             |
| Saint Lucia                      | 2005-2009   | 4     | 79.0                             | 2009              | Vital Registration                                                                                                                                | 94.4             | 16.3                      |                                             |
| Saint Lucia                      | 2010-2017   | 5     | 85.6                             | 2014              | Vital Registration                                                                                                                                | 100.0            | 14.4                      |                                             |
| Saint Vincent and the Grenadines | 1980-1984   | 4     | 72.3                             | 1983              | Vital Registration                                                                                                                                | 100.0            | 27.7                      |                                             |
| Saint Vincent and the Grenadines | 1985-1989   | 3     | 63.4                             | 1986              | Vital Registration                                                                                                                                | 92.2             | 31.2                      |                                             |
| Saint Vincent and the Grenadines | 1990-1994   | 3     | 61.2                             | 1990              | Vital Registration                                                                                                                                | 96.7             | 36.7                      |                                             |
| Saint Vincent and the Grenadines | 1995-1999   | 5     | 85.3                             | 1998              | Vital Registration                                                                                                                                | 100.0            | 14.7                      |                                             |
| Saint Vincent and the Grenadines | 2000-2004   | 5     | 85.1                             | 2002              | Vital Registration                                                                                                                                | 100.0            | 14.9                      |                                             |
| Saint Vincent and the Grenadines | 2005-2009   | 5     | 87.6                             | 2007              | Vital Registration                                                                                                                                | 99.2             | 11.7                      |                                             |
| Saint Vincent and the Grenadines | 2010-2017   | 5     | 87.3                             | 2014              | Vital Registration                                                                                                                                | 100.0            | 12.7                      |                                             |
| Samoa                            | 1980-1984   | 0     |                                  |                   |                                                                                                                                                   |                  |                           |                                             |
| Samoa                            | 1985-1989   | 0     |                                  |                   |                                                                                                                                                   |                  |                           |                                             |
| Samoa                            | 1990-1994   | 0     |                                  |                   |                                                                                                                                                   |                  |                           |                                             |
| Samoa                            | 1995-1999   | 0     |                                  |                   |                                                                                                                                                   |                  |                           |                                             |
| Samoa                            | 2000-2004   | 0     |                                  |                   |                                                                                                                                                   |                  |                           |                                             |
| Samoa                            | 2005-2009   | 0     |                                  |                   |                                                                                                                                                   |                  |                           |                                             |
| Samoa                            | 2010-2017   | 0     |                                  |                   |                                                                                                                                                   |                  |                           |                                             |
| Sao Tome and Principe            | 1980-1984   | 0     |                                  |                   |                                                                                                                                                   |                  |                           |                                             |
| Sao Tome and Principe            | 1985-1989   | 4     | 69.6                             | 1985              | Vital Registration                                                                                                                                | 100.0            | 30.4                      |                                             |
| Sao Tome and Principe            | 1990-1994   | 0     |                                  |                   |                                                                                                                                                   |                  |                           |                                             |
| Sao Tome and Principe            | 1995-1999   | 0     |                                  |                   |                                                                                                                                                   |                  |                           |                                             |
| Sao Tome and Principe            | 2000-2004   | 0     |                                  |                   |                                                                                                                                                   |                  |                           |                                             |
| Sao Tome and Principe            | 2005-2009   | 0     |                                  |                   |                                                                                                                                                   |                  |                           |                                             |
| Sao Tome and Principe            | 2010-2017   | 0     |                                  |                   |                                                                                                                                                   |                  |                           |                                             |
| Saudi Arabia                     | 1980-1984   | 0     |                                  |                   |                                                                                                                                                   |                  |                           |                                             |
| Saudi Arabia                     | 1985-1989   | 0     |                                  |                   |                                                                                                                                                   |                  |                           |                                             |
| Saudi Arabia                     | 1990-1994   | 0     |                                  |                   |                                                                                                                                                   |                  |                           |                                             |
| Saudi Arabia                     | 1995-1999   | 2     | 23.1                             | 1999              | Vital Registration                                                                                                                                | 42.3             | 45.5                      |                                             |
| Saudi Arabia                     | 2000-2004   | 2     | 27.5                             | 2004              | Vital Registration                                                                                                                                | 55.1             | 50.0                      |                                             |
| Saudi Arabia                     | 2005-2009   | 2     | 29.4                             | 2008              | Vital Registration                                                                                                                                | 63.1             | 53.5                      |                                             |
| Saudi Arabia                     | 2010-2017   | 2     | 28.8                             | 2010              | Vital Registration                                                                                                                                | 63.2             | 54.5                      |                                             |
| Senegal                          | 1980-1984   | 1     | 2.0                              | 1984              | Senegal - Risk of Death Associated with Different Nutritional States in Children of Preschool age: Study Conducted in Niakhar (Senegal) 1983-1986 |                  | 28.7                      | 2.7                                         |
| Senegal                          | 1985-1989   | 1     | 2.5                              | 1986              | International differences in clinical patterns of diarrhoeal deaths: a comparison of children from Brazil, Senegal, Bangladesh, and India         |                  | 30.0                      | 3.6                                         |
| Senegal                          | 1990-1994   | 1     | 2.6                              | 1993              | Childhood mortality and probable causes of death using verbal autopsy in Niakhar, Senegal, 1989-2000                                              |                  | 26.2                      | 3.5                                         |
| Senegal                          | 1995-1999   | 1     | 2.5                              | 1996              | Childhood mortality and probable causes of death using verbal autopsy in Niakhar, Senegal, 1989-2000                                              |                  | 25.1                      | 3.4                                         |
| Senegal                          | 2000-2004   | 0     |                                  |                   |                                                                                                                                                   |                  |                           |                                             |
| Senegal                          | 2005-2009   | 1     | 0.0                              | 2008              | Africa, Asia, Oceania - INDEPTH Network Cause-Specific Mortality - Release 2014                                                                   |                  | 99.6                      | 6.4                                         |
| Senegal                          | 2010-2017   | 0     | 0.0                              | 2010              | Africa, Asia, Oceania - INDEPTH Network Cause-Specific Mortality - Release 2014                                                                   |                  | 100.0                     | 6.4                                         |
| Serbia                           | 1980-1984   | 0     |                                  |                   |                                                                                                                                                   |                  |                           |                                             |
| Serbia                           | 1985-1989   | 0     |                                  |                   |                                                                                                                                                   |                  |                           |                                             |
| Serbia                           | 1990-1994   | 0     |                                  |                   |                                                                                                                                                   |                  |                           |                                             |
| Serbia                           | 1995-1999   | 4     | 66.7                             | 1999              | Vital Registration                                                                                                                                | 84.8             | 21.3                      |                                             |
| Serbia                           | 2000-2004   | 4     | 70.8                             | 2003              | Vital Registration                                                                                                                                | 89.0             | 20.4                      |                                             |
| Serbia                           | 2005-2009   | 4     | 74.9                             | 2005              | Vital Registration                                                                                                                                | 90.6             | 17.4                      |                                             |
| Serbia                           | 2010-2017   | 4     | 69.6                             | 2010              | Vital Registration                                                                                                                                | 83.5             | 16.7                      |                                             |
| Seychelles                       | 1980-1984   | 4     | 74.4                             | 1982              | Vital Registration                                                                                                                                | 100.0            | 25.6                      |                                             |
| Seychelles                       | 1985-1989   | 4     | 71.5                             | 1987              | Vital Registration                                                                                                                                | 98.7             | 27.6                      |                                             |
| Seychelles                       | 1990-1994   | 0     |                                  |                   |                                                                                                                                                   |                  |                           |                                             |
| Seychelles                       | 1995-1999   | 0     |                                  |                   |                                                                                                                                                   |                  |                           |                                             |
| Seychelles                       | 2000-2004   | 4     | 75.9                             | 2002              | Vital Registration                                                                                                                                | 100.0            | 24.1                      |                                             |
| Seychelles                       | 2005-2009   | 4     | 76.9                             | 2008              | Vital Registration                                                                                                                                | 100.0            | 23.1                      |                                             |
| Seychelles                       | 2010-2017   | 4     | 78.1                             | 2011              | Vital Registration                                                                                                                                | 100.0            | 21.9                      |                                             |
| Sierra Leone                     | 1980-1984   | 0     |                                  |                   |                                                                                                                                                   |                  |                           |                                             |
| Sierra Leone                     | 1985-1989   | 0     |                                  |                   |                                                                                                                                                   |                  |                           |                                             |
| Sierra Leone                     | 1990-1994   | 1     | 3.4                              | 1990              | Malaria in a rural area of Sierra Leone. I. Initial results                                                                                       |                  | 10.8                      | 3.8                                         |
| Sierra Leone                     | 1995-1999   | 0     |                                  |                   |                                                                                                                                                   |                  |                           |                                             |
| Sierra Leone                     | 2000-2004   | 0     |                                  |                   |                                                                                                                                                   |                  |                           |                                             |
| Sierra Leone                     | 2005-2009   | 0     |                                  |                   |                                                                                                                                                   |                  |                           |                                             |
| Sierra Leone                     | 2010-2017   | 0     |                                  |                   |                                                                                                                                                   |                  |                           |                                             |
| Singapore                        | 1980-1984   | 5     | 91.2                             | 1983              | Vital Registration                                                                                                                                | 100.0            | 8.8                       |                                             |
| Singapore                        | 1985-1989   | 5     | 92.0                             | 1985              | Vital Registration                                                                                                                                | 100.0            | 8.0                       |                                             |
| Singapore                        | 1990-1994   | 5     | 94.6                             | 1994              | Vital Registration                                                                                                                                | 99.9             | 5.3                       |                                             |

Appendix Table 8. Underlying indicators for percent well-certified for data source with maximum percent well certified in each 5-year time interval for 195 countries, 1980-2017

| Country         | Time Window | Stars | Percent Well-Certified [PWC] (%) | Max PWC Data Year | Max PWC Data Source                                                                       | Completeness (%) | Percent Major Garbage (%) | Verbal Autopsy Adjustment (None for VR) (%) |
|-----------------|-------------|-------|----------------------------------|-------------------|-------------------------------------------------------------------------------------------|------------------|---------------------------|---------------------------------------------|
| Singapore       | 1995-1999   | 5     | 95.1                             | 1997              | Vital Registration                                                                        | 99.7             | 4.7                       |                                             |
| Singapore       | 2000-2004   | 5     | 95.3                             | 2003              | Vital Registration                                                                        | 100.0            | 4.7                       |                                             |
| Singapore       | 2005-2009   | 5     | 94.9                             | 2007              | Vital Registration                                                                        | 100.0            | 5.1                       |                                             |
| Singapore       | 2010-2017   | 5     | 95.7                             | 2015              | Vital Registration                                                                        | 98.5             | 2.8                       |                                             |
| Slovakia        | 1980-1984   | 0     |                                  |                   |                                                                                           |                  |                           |                                             |
| Slovakia        | 1985-1989   | 0     |                                  |                   |                                                                                           |                  |                           |                                             |
| Slovakia        | 1990-1994   | 4     | 82.7                             | 1994              | Vital Registration                                                                        | 99.8             | 17.1                      |                                             |
| Slovakia        | 1995-1999   | 4     | 81.9                             | 1999              | Vital Registration                                                                        | 99.1             | 17.4                      |                                             |
| Slovakia        | 2000-2004   | 4     | 84.9                             | 2003              | Vital Registration                                                                        | 99.7             | 14.9                      |                                             |
| Slovakia        | 2005-2009   | 5     | 90.2                             | 2008              | Vital Registration                                                                        | 99.7             | 9.6                       |                                             |
| Slovakia        | 2010-2017   | 5     | 92.9                             | 2012              | Vital Registration                                                                        | 100.0            | 7.1                       |                                             |
| Slovenia        | 1980-1984   | 0     |                                  |                   |                                                                                           |                  |                           |                                             |
| Slovenia        | 1985-1989   | 5     | 91.6                             | 1985              | Vital Registration                                                                        | 100.0            | 8.4                       |                                             |
| Slovenia        | 1990-1994   | 5     | 92.5                             | 1992              | Vital Registration                                                                        | 100.0            | 7.5                       |                                             |
| Slovenia        | 1995-1999   | 5     | 91.8                             | 1997              | Vital Registration                                                                        | 100.0            | 8.2                       |                                             |
| Slovenia        | 2000-2004   | 5     | 89.3                             | 2000              | Vital Registration                                                                        | 100.0            | 10.7                      |                                             |
| Slovenia        | 2005-2009   | 5     | 88.3                             | 2009              | Vital Registration                                                                        | 100.0            | 11.7                      |                                             |
| Slovenia        | 2010-2017   | 5     | 88.5                             | 2011              | Vital Registration                                                                        | 100.0            | 11.5                      |                                             |
| Solomon Islands | 1980-1984   | 0     |                                  |                   |                                                                                           |                  |                           |                                             |
| Solomon Islands | 1985-1989   | 0     |                                  |                   |                                                                                           |                  |                           |                                             |
| Solomon Islands | 1990-1994   | 0     |                                  |                   |                                                                                           |                  |                           |                                             |
| Solomon Islands | 1995-1999   | 0     |                                  |                   |                                                                                           |                  |                           |                                             |
| Solomon Islands | 2000-2004   | 0     |                                  |                   |                                                                                           |                  |                           |                                             |
| Solomon Islands | 2005-2009   | 0     |                                  |                   |                                                                                           |                  |                           |                                             |
| Solomon Islands | 2010-2017   | 2     | 34.6                             | 2016              | Verbal Autopsy                                                                            |                  | 37.4                      | 55.3                                        |
| Somalia         | 1980-1984   | 0     |                                  |                   |                                                                                           |                  |                           |                                             |
| Somalia         | 1985-1989   | 0     |                                  |                   |                                                                                           |                  |                           |                                             |
| Somalia         | 1990-1994   | 0     |                                  |                   |                                                                                           |                  |                           |                                             |
| Somalia         | 1995-1999   | 0     |                                  |                   |                                                                                           |                  |                           |                                             |
| Somalia         | 2000-2004   | 0     |                                  |                   |                                                                                           |                  |                           |                                             |
| Somalia         | 2005-2009   | 0     |                                  |                   |                                                                                           |                  |                           |                                             |
| Somalia         | 2010-2017   | 0     |                                  |                   |                                                                                           |                  |                           |                                             |
| South Africa    | 1980-1984   | 0     |                                  |                   |                                                                                           |                  |                           |                                             |
| South Africa    | 1985-1989   | 0     |                                  |                   |                                                                                           |                  |                           |                                             |
| South Africa    | 1990-1994   | 1     | 1.0                              | 1991              | 'A bothersome death' -- narrative accounts of infant mortality in Cape Town, South Africa |                  | 19.0                      | 1.2                                         |
| South Africa    | 1995-1999   | 4     | 67.8                             | 1999              | Vital Registration                                                                        | 100.0            | 32.2                      |                                             |
| South Africa    | 2000-2004   | 4     | 72.0                             | 2004              | Vital Registration                                                                        | 100.0            | 28.0                      |                                             |
| South Africa    | 2005-2009   | 4     | 72.3                             | 2005              | Vital Registration                                                                        | 100.0            | 27.7                      |                                             |
| South Africa    | 2010-2017   | 4     | 70.7                             | 2013              | Vital Registration                                                                        | 100.0            | 29.3                      |                                             |
| South Korea     | 1980-1984   | 0     |                                  |                   |                                                                                           |                  |                           |                                             |
| South Korea     | 1985-1989   | 3     | 57.8                             | 1985              | Vital Registration                                                                        | 85.6             | 32.5                      |                                             |
| South Korea     | 1990-1994   | 4     | 74.2                             | 1994              | Vital Registration                                                                        | 96.0             | 22.7                      |                                             |
| South Korea     | 1995-1999   | 4     | 75.4                             | 1995              | Vital Registration                                                                        | 99.8             | 24.5                      |                                             |
| South Korea     | 2000-2004   | 4     | 84.5                             | 2002              | Vital Registration                                                                        | 100.0            | 15.5                      |                                             |
| South Korea     | 2005-2009   | 4     | 82.2                             | 2007              | Vital Registration                                                                        | 100.0            | 17.8                      |                                             |
| South Korea     | 2010-2017   | 4     | 81.9                             | 2014              | Vital Registration                                                                        | 99.7             | 17.9                      |                                             |
| South Sudan     | 1980-1984   | 0     |                                  |                   |                                                                                           |                  |                           |                                             |
| South Sudan     | 1985-1989   | 0     |                                  |                   |                                                                                           |                  |                           |                                             |
| South Sudan     | 1990-1994   | 0     |                                  |                   |                                                                                           |                  |                           |                                             |
| South Sudan     | 1995-1999   | 0     |                                  |                   |                                                                                           |                  |                           |                                             |
| South Sudan     | 2000-2004   | 0     |                                  |                   |                                                                                           |                  |                           |                                             |
| South Sudan     | 2005-2009   | 0     |                                  |                   |                                                                                           |                  |                           |                                             |
| South Sudan     | 2010-2017   | 0     |                                  |                   |                                                                                           |                  |                           |                                             |
| Spain           | 1980-1984   | 4     | 77.3                             | 1984              | Vital Registration                                                                        | 99.4             | 22.2                      |                                             |
| Spain           | 1985-1989   | 4     | 79.4                             | 1989              | Vital Registration                                                                        | 100.0            | 20.6                      |                                             |
| Spain           | 1990-1994   | 4     | 82.6                             | 1994              | Vital Registration                                                                        | 100.0            | 17.4                      |                                             |
| Spain           | 1995-1999   | 4     | 83.8                             | 1998              | Vital Registration                                                                        | 100.0            | 16.2                      |                                             |
| Spain           | 2000-2004   | 4     | 83.1                             | 2002              | Vital Registration                                                                        | 100.0            | 16.9                      |                                             |
| Spain           | 2005-2009   | 4     | 84.0                             | 2009              | Vital Registration                                                                        | 100.0            | 16.0                      |                                             |
| Spain           | 2010-2017   | 4     | 84.8                             | 2015              | Vital Registration                                                                        | 100.0            | 15.2                      |                                             |
| Sri Lanka       | 1980-1984   | 3     | 52.0                             | 1980              | Vital Registration                                                                        | 100.0            | 48.0                      |                                             |
| Sri Lanka       | 1985-1989   | 3     | 50.2                             | 1986              | Vital Registration                                                                        | 100.0            | 49.8                      |                                             |
| Sri Lanka       | 1990-1994   | 3     | 47.7                             | 1993              | Vital Registration                                                                        | 100.0            | 52.3                      |                                             |
| Sri Lanka       | 1995-1999   | 3     | 55.4                             | 1999              | Vital Registration                                                                        | 100.0            | 44.6                      |                                             |
| Sri Lanka       | 2000-2004   | 3     | 63.7                             | 2004              | Vital Registration                                                                        | 100.0            | 36.3                      |                                             |
| Sri Lanka       | 2005-2009   | 4     | 67.4                             | 2007              | Vital Registration                                                                        | 100.0            | 32.6                      |                                             |
| Sri Lanka       | 2010-2017   | 3     | 64.8                             | 2010              | Vital Registration                                                                        | 100.0            | 35.2                      |                                             |
| Sudan           | 1980-1984   | 0     |                                  |                   |                                                                                           |                  |                           |                                             |
| Sudan           | 1985-1989   | 0     |                                  |                   |                                                                                           |                  |                           |                                             |
| Sudan           | 1990-1994   | 0     |                                  |                   |                                                                                           |                  |                           |                                             |
| Sudan           | 1995-1999   | 0     |                                  |                   |                                                                                           |                  |                           |                                             |
| Sudan           | 2000-2004   | 0     |                                  |                   |                                                                                           |                  |                           |                                             |
| Sudan           | 2005-2009   | 0     |                                  |                   |                                                                                           |                  |                           |                                             |
| Sudan           | 2010-2017   | 0     |                                  |                   |                                                                                           |                  |                           |                                             |

**Appendix Table 8. Underlying indicators for percent well-certified for data source with maximum percent well certified in each 5-year time interval for 195 countries, 1980-2017**

| Country                    | Time Window | Stars | Percent Well-Certified [PWC] (%) | Max PWC Data Year | Max PWC Data Source                                                                                                                                                                                                          | Completeness (%) | Percent Major Garbage (%) | Verbal Autopsy Adjustment (None for VR) (%) |
|----------------------------|-------------|-------|----------------------------------|-------------------|------------------------------------------------------------------------------------------------------------------------------------------------------------------------------------------------------------------------------|------------------|---------------------------|---------------------------------------------|
| Suriname                   | 1980-1984   | 3     | 60.0                             | 1984              | Vital Registration                                                                                                                                                                                                           | 87.6             | 31.5                      |                                             |
| Suriname                   | 1985-1989   | 3     | 63.7                             | 1989              | Vital Registration                                                                                                                                                                                                           | 91.3             | 30.2                      |                                             |
| Suriname                   | 1990-1994   | 3     | 61.2                             | 1991              | Vital Registration                                                                                                                                                                                                           | 86.2             | 29.0                      |                                             |
| Suriname                   | 1995-1999   | 4     | 66.4                             | 1999              | Vital Registration                                                                                                                                                                                                           | 92.4             | 28.2                      |                                             |
| Suriname                   | 2000-2004   | 4     | 74.3                             | 2002              | Vital Registration                                                                                                                                                                                                           | 93.5             | 20.5                      |                                             |
| Suriname                   | 2005-2009   | 4     | 73.3                             | 2008              | Vital Registration                                                                                                                                                                                                           | 91.1             | 19.5                      |                                             |
| Suriname                   | 2010-2017   | 4     | 73.9                             | 2010              | Vital Registration                                                                                                                                                                                                           | 90.3             | 18.2                      |                                             |
| Swaziland                  | 1980-1984   | 0     |                                  |                   |                                                                                                                                                                                                                              |                  |                           |                                             |
| Swaziland                  | 1985-1989   | 0     |                                  |                   |                                                                                                                                                                                                                              |                  |                           |                                             |
| Swaziland                  | 1990-1994   | 0     |                                  |                   |                                                                                                                                                                                                                              |                  |                           |                                             |
| Swaziland                  | 1995-1999   | 0     |                                  |                   |                                                                                                                                                                                                                              |                  |                           |                                             |
| Swaziland                  | 2000-2004   | 1     | 0.0                              | 2000              | Effect of HIV infection on pregnancy-related mortality in sub-Saharan Africa: secondary analyses of pooled community-based data from the network for Analysing Longitudinal Population-based HIV/AIDS data on Africa (ALPHA) |                  | 94.9                      | 0.4                                         |
| Swaziland                  | 2005-2009   | 0     |                                  |                   |                                                                                                                                                                                                                              |                  |                           |                                             |
| Swaziland                  | 2010-2017   | 0     |                                  |                   |                                                                                                                                                                                                                              |                  |                           |                                             |
| Sweden                     | 1980-1984   | 5     | 87.4                             | 1980              | Vital Registration                                                                                                                                                                                                           | 99.1             | 11.8                      |                                             |
| Sweden                     | 1985-1989   | 5     | 88.6                             | 1988              | Vital Registration                                                                                                                                                                                                           | 100.0            | 11.4                      |                                             |
| Sweden                     | 1990-1994   | 5     | 88.2                             | 1990              | Vital Registration                                                                                                                                                                                                           | 100.0            | 11.8                      |                                             |
| Sweden                     | 1995-1999   | 5     | 87.1                             | 1995              | Vital Registration                                                                                                                                                                                                           | 100.0            | 12.9                      |                                             |
| Sweden                     | 2000-2004   | 5     | 85.7                             | 2002              | Vital Registration                                                                                                                                                                                                           | 100.0            | 14.3                      |                                             |
| Sweden                     | 2005-2009   | 5     | 85.9                             | 2005              | Vital Registration                                                                                                                                                                                                           | 99.9             | 14.1                      |                                             |
| Sweden                     | 2010-2017   | 4     | 84.8                             | 2013              | Vital Registration                                                                                                                                                                                                           | 99.9             | 15.2                      |                                             |
| Switzerland                | 1980-1984   | 4     | 73.8                             | 1983              | Vital Registration                                                                                                                                                                                                           | 100.0            | 26.2                      |                                             |
| Switzerland                | 1985-1989   | 4     | 74.2                             | 1986              | Vital Registration                                                                                                                                                                                                           | 100.0            | 25.8                      |                                             |
| Switzerland                | 1990-1994   | 4     | 73.4                             | 1990              | Vital Registration                                                                                                                                                                                                           | 100.0            | 26.6                      |                                             |
| Switzerland                | 1995-1999   | 4     | 84.6                             | 1998              | Vital Registration                                                                                                                                                                                                           | 100.0            | 15.4                      |                                             |
| Switzerland                | 2000-2004   | 4     | 84.4                             | 2003              | Vital Registration                                                                                                                                                                                                           | 100.0            | 15.6                      |                                             |
| Switzerland                | 2005-2009   | 5     | 86.7                             | 2008              | Vital Registration                                                                                                                                                                                                           | 100.0            | 13.3                      |                                             |
| Switzerland                | 2010-2017   | 5     | 86.1                             | 2010              | Vital Registration                                                                                                                                                                                                           | 100.0            | 13.9                      |                                             |
| Syria                      | 1980-1984   | 2     | 29.5                             | 1980              | Vital Registration                                                                                                                                                                                                           | 100.0            | 70.5                      |                                             |
| Syria                      | 1985-1989   | 2     | 13.2                             | 1985              | Vital Registration                                                                                                                                                                                                           | 66.4             | 80.1                      |                                             |
| Syria                      | 1990-1994   | 0     |                                  |                   |                                                                                                                                                                                                                              |                  |                           |                                             |
| Syria                      | 1995-1999   | 3     | 54.3                             | 1999              | Vital Registration                                                                                                                                                                                                           | 100.0            | 45.7                      |                                             |
| Syria                      | 2000-2004   | 4     | 66.7                             | 2004              | Vital Registration                                                                                                                                                                                                           | 97.9             | 31.9                      |                                             |
| Syria                      | 2005-2009   | 4     | 74.4                             | 2009              | Vital Registration                                                                                                                                                                                                           | 99.7             | 25.4                      |                                             |
| Syria                      | 2010-2017   | 3     | 59.8                             | 2010              | Vital Registration                                                                                                                                                                                                           | 100.0            | 40.2                      |                                             |
| Taiwan (Province of China) | 1980-1984   | 4     | 84.3                             | 1980              | Vital Registration                                                                                                                                                                                                           | 99.2             | 15.0                      |                                             |
| Taiwan (Province of China) | 1985-1989   | 4     | 82.4                             | 1986              | Vital Registration                                                                                                                                                                                                           | 100.0            | 17.6                      |                                             |
| Taiwan (Province of China) | 1990-1994   | 4     | 79.2                             | 1990              | Vital Registration                                                                                                                                                                                                           | 99.3             | 20.2                      |                                             |
| Taiwan (Province of China) | 1995-1999   | 4     | 83.4                             | 1999              | Vital Registration                                                                                                                                                                                                           | 99.7             | 16.4                      |                                             |
| Taiwan (Province of China) | 2000-2004   | 4     | 84.4                             | 2004              | Vital Registration                                                                                                                                                                                                           | 100.0            | 15.6                      |                                             |
| Taiwan (Province of China) | 2005-2009   | 4     | 84.8                             | 2005              | Vital Registration                                                                                                                                                                                                           | 100.0            | 15.2                      |                                             |
| Taiwan (Province of China) | 2010-2017   | 4     | 83.7                             | 2014              | Vital Registration                                                                                                                                                                                                           | 100.0            | 16.3                      |                                             |
| Tajikistan                 | 1980-1984   | 4     | 74.9                             | 1981              | Vital Registration                                                                                                                                                                                                           | 89.2             | 16.0                      |                                             |
| Tajikistan                 | 1985-1989   | 4     | 71.4                             | 1988              | Vital Registration                                                                                                                                                                                                           | 92.9             | 23.1                      |                                             |
| Tajikistan                 | 1990-1994   | 4     | 71.6                             | 1992              | Vital Registration                                                                                                                                                                                                           | 92.8             | 22.9                      |                                             |
| Tajikistan                 | 1995-1999   | 3     | 58.5                             | 1995              | Vital Registration                                                                                                                                                                                                           | 82.9             | 29.4                      |                                             |
| Tajikistan                 | 2000-2004   | 3     | 51.4                             | 2002              | Vital Registration                                                                                                                                                                                                           | 74.0             | 30.5                      |                                             |
| Tajikistan                 | 2005-2009   | 3     | 50.6                             | 2005              | Vital Registration                                                                                                                                                                                                           | 75.4             | 32.9                      |                                             |
| Tajikistan                 | 2010-2017   | 3     | 50.7                             | 2016              | Vital Registration                                                                                                                                                                                                           | 75.6             | 33.0                      |                                             |
| Tanzania                   | 1980-1984   | 0     |                                  |                   |                                                                                                                                                                                                                              |                  |                           |                                             |
| Tanzania                   | 1985-1989   | 1     | 2.8                              | 1986              | Risk factors for deaths in children under 5 years old in Bagamoyo district, Tanzania                                                                                                                                         |                  | 20.7                      | 3.5                                         |
| Tanzania                   | 1990-1994   | 1     | 1.8                              | 1993              | Community based studies on childhood mortality in a malaria holoendemic area on the Tanzanian coast                                                                                                                          |                  | 46.6                      | 3.3                                         |
| Tanzania                   | 1995-1999   | 1     | 2.1                              | 1995              | The Policy Implications of Tanzania's Mortality Burden                                                                                                                                                                       |                  | 67.2                      | 6.4                                         |
| Tanzania                   | 2000-2004   | 1     | 6.3                              | 2000              | Tanzania - Rufiji Health and Demographic Surveillance System                                                                                                                                                                 |                  | 0.9                       | 6.4                                         |
| Tanzania                   | 2005-2009   | 1     | 2.5                              | 2005              | The contribution of reduction in malaria as a cause of rapid decline of under-five mortality: evidence from the Rufiji Health and Demographic Surveillance System (HDSS) in rural Tanzania                                   |                  | 6.7                       | 2.7                                         |
| Tanzania                   | 2010-2017   | 0     |                                  |                   |                                                                                                                                                                                                                              |                  |                           |                                             |
| Thailand                   | 1980-1984   | 2     | 29.9                             | 1980              | Vital Registration                                                                                                                                                                                                           | 80.3             | 62.8                      |                                             |
| Thailand                   | 1985-1989   | 2     | 28.3                             | 1987              | Vital Registration                                                                                                                                                                                                           | 80.3             | 64.8                      |                                             |
| Thailand                   | 1990-1994   | 3     | 35.9                             | 1994              | Vital Registration                                                                                                                                                                                                           | 87.6             | 59.0                      |                                             |
| Thailand                   | 1995-1999   | 3     | 62.6                             | 1998              | Thailand Burden of Disease and Injuries 1998-1999                                                                                                                                                                            |                  | 2.2                       | 64.0                                        |
| Thailand                   | 2000-2004   | 3     | 52.0                             | 2003              | Vital Registration                                                                                                                                                                                                           | 100.0            | 48.0                      |                                             |
| Thailand                   | 2005-2009   | 3     | 61.6                             | 2005              | Thailand Verbal Autopsy Study 2005                                                                                                                                                                                           |                  | 3.7                       | 64.0                                        |
| Thailand                   | 2010-2017   | 3     | 62.3                             | 2016              | Vital Registration                                                                                                                                                                                                           | 100.0            | 37.7                      |                                             |
| The Bahamas                | 1980-1984   | 4     | 76.2                             | 1984              | Vital Registration                                                                                                                                                                                                           | 95.8             | 20.5                      |                                             |
| The Bahamas                | 1985-1989   | 4     | 82.6                             | 1987              | Vital Registration                                                                                                                                                                                                           | 100.0            | 17.4                      |                                             |
| The Bahamas                | 1990-1994   | 4     | 83.0                             | 1994              | Vital Registration                                                                                                                                                                                                           | 100.0            | 17.0                      |                                             |
| The Bahamas                | 1995-1999   | 5     | 89.8                             | 1999              | Vital Registration                                                                                                                                                                                                           | 100.0            | 10.2                      |                                             |
| The Bahamas                | 2000-2004   | 5     | 87.7                             | 2000              | Vital Registration                                                                                                                                                                                                           | 100.0            | 12.3                      |                                             |
| The Bahamas                | 2005-2009   | 5     | 86.7                             | 2009              | Vital Registration                                                                                                                                                                                                           | 100.0            | 13.3                      |                                             |
| The Bahamas                | 2010-2017   | 5     | 86.3                             | 2011              | Vital Registration                                                                                                                                                                                                           | 100.0            | 13.7                      |                                             |



**Appendix Table 8. Underlying indicators for percent well-certified for data source with maximum percent well certified in each 5-year time interval for 195 countries, 1980-2017**

| Country             | Time Window | Stars | Percent Well-Certified [PWC] (%) | Max PWC Data Year | Max PWC Data Source                                                                                                                                                                                                          | Completeness (%) | Percent Major Garbage (%) | Verbal Autopsy Adjustment (None for VR) (%) |
|---------------------|-------------|-------|----------------------------------|-------------------|------------------------------------------------------------------------------------------------------------------------------------------------------------------------------------------------------------------------------|------------------|---------------------------|---------------------------------------------|
| The Gambia          | 1980-1984   | 1     | 2.8                              | 1982              | Deaths in infancy and early childhood in a well-vaccinated, rural West African population                                                                                                                                    |                  | 20.7                      | 3.5                                         |
| The Gambia          | 1985-1989   | 1     | 2.2                              | 1989              | Changes in the pattern of infant and childhood mortality in upper river division, The Gambia, from 1989 to 1993                                                                                                              |                  | 29.4                      | 3.1                                         |
| The Gambia          | 1990-1994   | 1     | 2.1                              | 1991              | Changes in the pattern of infant and childhood mortality in upper river division, The Gambia, from 1989 to 1993                                                                                                              |                  | 30.2                      | 3.1                                         |
| The Gambia          | 1995-1999   | 1     | 0.9                              | 1999              | Reaching millennium development goal 4 - the Gambia                                                                                                                                                                          |                  | 65.1                      | 2.7                                         |
| The Gambia          | 2000-2004   | 1     | 0.7                              | 2002              | Reaching millennium development goal 4 - the Gambia                                                                                                                                                                          |                  | 70.4                      | 2.5                                         |
| The Gambia          | 2005-2009   | 1     | 1.0                              | 2006              | Preventive measures in infancy to reduce under-five mortality: a case-control study in The Gambia                                                                                                                            |                  | 56.0                      | 2.2                                         |
| The Gambia          | 2010-2017   | 0     |                                  |                   |                                                                                                                                                                                                                              |                  |                           |                                             |
| Timor-Leste         | 1980-1984   | 0     |                                  |                   |                                                                                                                                                                                                                              |                  |                           |                                             |
| Timor-Leste         | 1985-1989   | 0     |                                  |                   |                                                                                                                                                                                                                              |                  |                           |                                             |
| Timor-Leste         | 1990-1994   | 0     |                                  |                   |                                                                                                                                                                                                                              |                  |                           |                                             |
| Timor-Leste         | 1995-1999   | 0     |                                  |                   |                                                                                                                                                                                                                              |                  |                           |                                             |
| Timor-Leste         | 2000-2004   | 0     |                                  |                   |                                                                                                                                                                                                                              |                  |                           |                                             |
| Timor-Leste         | 2005-2009   | 0     |                                  |                   |                                                                                                                                                                                                                              |                  |                           |                                             |
| Timor-Leste         | 2010-2017   | 0     |                                  |                   |                                                                                                                                                                                                                              |                  |                           |                                             |
| Togo                | 1980-1984   | 0     |                                  |                   |                                                                                                                                                                                                                              |                  |                           |                                             |
| Togo                | 1985-1989   | 0     |                                  |                   |                                                                                                                                                                                                                              |                  |                           |                                             |
| Togo                | 1990-1994   | 0     |                                  |                   |                                                                                                                                                                                                                              |                  |                           |                                             |
| Togo                | 1995-1999   | 0     |                                  |                   |                                                                                                                                                                                                                              |                  |                           |                                             |
| Togo                | 2000-2004   | 0     |                                  |                   |                                                                                                                                                                                                                              |                  |                           |                                             |
| Togo                | 2005-2009   | 0     |                                  |                   |                                                                                                                                                                                                                              |                  |                           |                                             |
| Togo                | 2010-2017   | 0     |                                  |                   |                                                                                                                                                                                                                              |                  |                           |                                             |
| Tonga               | 1980-1984   | 0     |                                  |                   |                                                                                                                                                                                                                              |                  |                           |                                             |
| Tonga               | 1985-1989   | 0     |                                  |                   |                                                                                                                                                                                                                              |                  |                           |                                             |
| Tonga               | 1990-1994   | 0     |                                  |                   |                                                                                                                                                                                                                              |                  |                           |                                             |
| Tonga               | 1995-1999   | 0     |                                  |                   |                                                                                                                                                                                                                              |                  |                           |                                             |
| Tonga               | 2000-2004   | 3     | 53.6                             | 2003              | Vital Registration                                                                                                                                                                                                           | 100.0            | 46.4                      |                                             |
| Tonga               | 2005-2009   | 0     |                                  |                   |                                                                                                                                                                                                                              |                  |                           |                                             |
| Tonga               | 2010-2017   | 0     |                                  |                   |                                                                                                                                                                                                                              |                  |                           |                                             |
| Trinidad and Tobago | 1980-1984   | 4     | 79.2                             | 1983              | Vital Registration                                                                                                                                                                                                           | 94.7             | 16.3                      |                                             |
| Trinidad and Tobago | 1985-1989   | 4     | 83.4                             | 1987              | Vital Registration                                                                                                                                                                                                           | 98.6             | 15.4                      |                                             |
| Trinidad and Tobago | 1990-1994   | 5     | 85.5                             | 1994              | Vital Registration                                                                                                                                                                                                           | 100.0            | 14.5                      |                                             |
| Trinidad and Tobago | 1995-1999   | 5     | 89.5                             | 1999              | Vital Registration                                                                                                                                                                                                           | 100.0            | 10.5                      |                                             |
| Trinidad and Tobago | 2000-2004   | 5     | 90.7                             | 2002              | Vital Registration                                                                                                                                                                                                           | 100.0            | 9.3                       |                                             |
| Trinidad and Tobago | 2005-2009   | 5     | 89.6                             | 2005              | Vital Registration                                                                                                                                                                                                           | 100.0            | 10.4                      |                                             |
| Trinidad and Tobago | 2010-2017   | 5     | 90.1                             | 2011              | Vital Registration                                                                                                                                                                                                           | 100.0            | 9.9                       |                                             |
| Tunisia             | 1980-1984   | 0     |                                  |                   |                                                                                                                                                                                                                              |                  |                           |                                             |
| Tunisia             | 1985-1989   | 0     |                                  |                   |                                                                                                                                                                                                                              |                  |                           |                                             |
| Tunisia             | 1990-1994   | 0     |                                  |                   |                                                                                                                                                                                                                              |                  |                           |                                             |
| Tunisia             | 1995-1999   | 0     |                                  |                   |                                                                                                                                                                                                                              |                  |                           |                                             |
| Tunisia             | 2000-2004   | 0     |                                  |                   |                                                                                                                                                                                                                              |                  |                           |                                             |
| Tunisia             | 2005-2009   | 2     | 28.9                             | 2009              | Vital Registration                                                                                                                                                                                                           | 39.0             | 25.8                      |                                             |
| Tunisia             | 2010-2017   | 2     | 24.8                             | 2013              | Vital Registration                                                                                                                                                                                                           | 38.2             | 35.2                      |                                             |
| Turkey              | 1980-1984   | 2     | 16.8                             | 1983              | Vital Registration                                                                                                                                                                                                           | 36.2             | 53.6                      |                                             |
| Turkey              | 1985-1989   | 2     | 19.6                             | 1989              | Vital Registration                                                                                                                                                                                                           | 42.2             | 53.5                      |                                             |
| Turkey              | 1990-1994   | 2     | 20.7                             | 1993              | Vital Registration                                                                                                                                                                                                           | 44.5             | 53.4                      |                                             |
| Turkey              | 1995-1999   | 2     | 24.0                             | 1999              | Vital Registration                                                                                                                                                                                                           | 54.8             | 56.2                      |                                             |
| Turkey              | 2000-2004   | 3     | 59.7                             | 2002              | Turkey Verbal Autopsy Survey 2003                                                                                                                                                                                            |                  | 6.6                       | 64.0                                        |
| Turkey              | 2005-2009   | 4     | 70.3                             | 2009              | Vital Registration                                                                                                                                                                                                           | 88.1             | 20.1                      |                                             |
| Turkey              | 2010-2017   | 4     | 83.9                             | 2013              | Vital Registration                                                                                                                                                                                                           | 99.3             | 15.5                      |                                             |
| Turkmenistan        | 1980-1984   | 5     | 88.4                             | 1981              | Vital Registration                                                                                                                                                                                                           | 100.0            | 11.6                      |                                             |
| Turkmenistan        | 1985-1989   | 5     | 88.1                             | 1986              | Vital Registration                                                                                                                                                                                                           | 100.0            | 11.9                      |                                             |
| Turkmenistan        | 1990-1994   | 4     | 83.0                             | 1991              | Vital Registration                                                                                                                                                                                                           | 100.0            | 17.0                      |                                             |
| Turkmenistan        | 1995-1999   | 4     | 80.9                             | 1995              | Vital Registration                                                                                                                                                                                                           | 100.0            | 19.1                      |                                             |
| Turkmenistan        | 2000-2004   | 5     | 85.1                             | 2002              | Vital Registration                                                                                                                                                                                                           | 96.4             | 11.7                      |                                             |
| Turkmenistan        | 2005-2009   | 4     | 81.0                             | 2009              | Vital Registration                                                                                                                                                                                                           | 96.9             | 16.4                      |                                             |
| Turkmenistan        | 2010-2017   | 4     | 83.4                             | 2010              | Vital Registration                                                                                                                                                                                                           | 100.0            | 16.6                      |                                             |
| USA                 | 1980-1984   | 5     | 88.5                             | 1980              | Vital Registration                                                                                                                                                                                                           | 98.0             | 9.6                       |                                             |
| USA                 | 1985-1989   | 5     | 88.1                             | 1989              | Vital Registration                                                                                                                                                                                                           | 98.8             | 10.8                      |                                             |
| USA                 | 1990-1994   | 5     | 88.7                             | 1993              | Vital Registration                                                                                                                                                                                                           | 99.6             | 11.0                      |                                             |
| USA                 | 1995-1999   | 5     | 88.1                             | 1999              | Vital Registration                                                                                                                                                                                                           | 100.0            | 11.9                      |                                             |
| USA                 | 2000-2004   | 5     | 88.0                             | 2000              | Vital Registration                                                                                                                                                                                                           | 100.0            | 12.0                      |                                             |
| USA                 | 2005-2009   | 5     | 87.2                             | 2005              | Vital Registration                                                                                                                                                                                                           | 100.0            | 12.8                      |                                             |
| USA                 | 2010-2017   | 5     | 86.7                             | 2010              | Vital Registration                                                                                                                                                                                                           | 99.9             | 13.2                      |                                             |
| Uganda              | 1980-1984   | 0     |                                  |                   |                                                                                                                                                                                                                              |                  |                           |                                             |
| Uganda              | 1985-1989   | 0     |                                  |                   |                                                                                                                                                                                                                              |                  |                           |                                             |
| Uganda              | 1990-1994   | 0     |                                  |                   |                                                                                                                                                                                                                              |                  |                           |                                             |
| Uganda              | 1995-1999   | 0     |                                  |                   |                                                                                                                                                                                                                              |                  |                           |                                             |
| Uganda              | 2000-2004   | 1     | 0.0                              | 2000              | Effect of HIV infection on pregnancy-related mortality in sub-Saharan Africa: secondary analyses of pooled community-based data from the network for Analysing Longitudinal Population-based HIV/AIDS data on Africa (ALPHA) |                  | 95.7                      | 0.4                                         |
| Uganda              | 2005-2009   | 1     | 2.7                              | 2006              | Uganda Child Verbal Autopsy Study 2007                                                                                                                                                                                       |                  | 12.4                      | 3.0                                         |
| Uganda              | 2010-2017   | 0     |                                  |                   |                                                                                                                                                                                                                              |                  |                           |                                             |
| Ukraine             | 1980-1984   | 5     | 87.4                             | 1982              | Vital Registration                                                                                                                                                                                                           | 98.5             | 11.2                      |                                             |

Appendix Table 8. Underlying indicators for percent well-certified for data source with maximum percent well certified in each 5-year time interval for 195 countries, 1980-2017

| Country              | Time Window | Stars | Percent Well-Certified [PWC] (%) | Max PWC Data Year | Max PWC Data Source                                                                                                         | Completeness (%) | Percent Major Garbage (%) | Verbal Autopsy Adjustment (None for VR) (%) |
|----------------------|-------------|-------|----------------------------------|-------------------|-----------------------------------------------------------------------------------------------------------------------------|------------------|---------------------------|---------------------------------------------|
| Ukraine              | 1985-1989   | 5     | 90.0                             | 1985              | Vital Registration                                                                                                          | 100.0            | 10.0                      |                                             |
| Ukraine              | 1990-1994   | 4     | 83.5                             | 1994              | Vital Registration                                                                                                          | 100.0            | 16.5                      |                                             |
| Ukraine              | 1995-1999   | 5     | 86.0                             | 1999              | Vital Registration                                                                                                          | 100.0            | 14.0                      |                                             |
| Ukraine              | 2000-2004   | 5     | 86.4                             | 2000              | Vital Registration                                                                                                          | 100.0            | 13.6                      |                                             |
| Ukraine              | 2005-2009   | 5     | 90.9                             | 2009              | Vital Registration                                                                                                          | 100.0            | 9.1                       |                                             |
| Ukraine              | 2010-2017   | 5     | 92.2                             | 2012              | Vital Registration                                                                                                          | 100.0            | 7.8                       |                                             |
| United Arab Emirates | 1980-1984   | 0     |                                  |                   |                                                                                                                             |                  |                           |                                             |
| United Arab Emirates | 1985-1989   | 0     |                                  |                   |                                                                                                                             |                  |                           |                                             |
| United Arab Emirates | 1990-1994   | 0     |                                  |                   |                                                                                                                             |                  |                           |                                             |
| United Arab Emirates | 1995-1999   | 0     |                                  |                   |                                                                                                                             |                  |                           |                                             |
| United Arab Emirates | 2000-2004   | 0     |                                  |                   |                                                                                                                             |                  |                           |                                             |
| United Arab Emirates | 2005-2009   | 3     | 41.5                             | 2007              | Vital Registration                                                                                                          | 81.9             | 49.3                      |                                             |
| United Arab Emirates | 2010-2017   | 0     |                                  |                   |                                                                                                                             |                  |                           |                                             |
| United Kingdom       | 1980-1984   | 5     | 94.2                             | 1984              | Vital Registration                                                                                                          | 100.0            | 5.8                       |                                             |
| United Kingdom       | 1985-1989   | 5     | 94.1                             | 1985              | Vital Registration                                                                                                          | 100.0            | 5.9                       |                                             |
| United Kingdom       | 1990-1994   | 5     | 94.1                             | 1992              | Vital Registration                                                                                                          | 100.0            | 5.9                       |                                             |
| United Kingdom       | 1995-1999   | 5     | 92.0                             | 1995              | Vital Registration                                                                                                          | 100.0            | 8.0                       |                                             |
| United Kingdom       | 2000-2004   | 5     | 91.4                             | 2001              | Vital Registration                                                                                                          | 100.0            | 8.6                       |                                             |
| United Kingdom       | 2005-2009   | 5     | 91.5                             | 2009              | Vital Registration                                                                                                          | 100.0            | 8.5                       |                                             |
| United Kingdom       | 2010-2017   | 5     | 92.4                             | 2014              | Vital Registration                                                                                                          | 100.0            | 7.6                       |                                             |
| Uruguay              | 1980-1984   | 4     | 77.3                             | 1982              | Vital Registration                                                                                                          | 100.0            | 22.7                      |                                             |
| Uruguay              | 1985-1989   | 4     | 76.0                             | 1985              | Vital Registration                                                                                                          | 100.0            | 24.0                      |                                             |
| Uruguay              | 1990-1994   | 4     | 79.1                             | 1991              | Vital Registration                                                                                                          | 100.0            | 20.9                      |                                             |
| Uruguay              | 1995-1999   | 4     | 79.1                             | 1998              | Vital Registration                                                                                                          | 100.0            | 20.9                      |                                             |
| Uruguay              | 2000-2004   | 4     | 79.6                             | 2001              | Vital Registration                                                                                                          | 100.0            | 20.4                      |                                             |
| Uruguay              | 2005-2009   | 4     | 78.5                             | 2005              | Vital Registration                                                                                                          | 100.0            | 21.5                      |                                             |
| Uruguay              | 2010-2017   | 4     | 77.5                             | 2015              | Vital Registration                                                                                                          | 100.0            | 22.5                      |                                             |
| Uzbekistan           | 1980-1984   | 4     | 83.1                             | 1982              | Vital Registration                                                                                                          | 97.7             | 14.9                      |                                             |
| Uzbekistan           | 1985-1989   | 5     | 86.3                             | 1985              | Vital Registration                                                                                                          | 100.0            | 13.7                      |                                             |
| Uzbekistan           | 1990-1994   | 4     | 85.0                             | 1992              | Vital Registration                                                                                                          | 100.0            | 15.0                      |                                             |
| Uzbekistan           | 1995-1999   | 4     | 79.0                             | 1995              | Vital Registration                                                                                                          | 94.9             | 16.8                      |                                             |
| Uzbekistan           | 2000-2004   | 4     | 68.3                             | 2000              | Vital Registration                                                                                                          | 83.8             | 18.5                      |                                             |
| Uzbekistan           | 2005-2009   | 4     | 72.2                             | 2009              | Vital Registration                                                                                                          | 79.4             | 9.1                       |                                             |
| Uzbekistan           | 2010-2017   | 4     | 79.8                             | 2012              | Vital Registration                                                                                                          | 88.9             | 10.2                      |                                             |
| Vanuatu              | 1980-1984   | 0     |                                  |                   |                                                                                                                             |                  |                           |                                             |
| Vanuatu              | 1985-1989   | 0     |                                  |                   |                                                                                                                             |                  |                           |                                             |
| Vanuatu              | 1990-1994   | 0     |                                  |                   |                                                                                                                             |                  |                           |                                             |
| Vanuatu              | 1995-1999   | 0     |                                  |                   |                                                                                                                             |                  |                           |                                             |
| Vanuatu              | 2000-2004   | 0     |                                  |                   |                                                                                                                             |                  |                           |                                             |
| Vanuatu              | 2005-2009   | 0     |                                  |                   |                                                                                                                             |                  |                           |                                             |
| Vanuatu              | 2010-2017   | 0     |                                  |                   |                                                                                                                             |                  |                           |                                             |
| Venezuela            | 1980-1984   | 4     | 81.3                             | 1983              | Vital Registration                                                                                                          | 99.8             | 18.6                      |                                             |
| Venezuela            | 1985-1989   | 4     | 75.2                             | 1988              | Vital Registration                                                                                                          | 100.0            | 24.8                      |                                             |
| Venezuela            | 1990-1994   | 4     | 83.3                             | 1994              | Vital Registration                                                                                                          | 99.8             | 16.5                      |                                             |
| Venezuela            | 1995-1999   | 5     | 87.8                             | 1999              | Vital Registration                                                                                                          | 100.0            | 12.2                      |                                             |
| Venezuela            | 2000-2004   | 5     | 89.8                             | 2001              | Vital Registration                                                                                                          | 100.0            | 10.2                      |                                             |
| Venezuela            | 2005-2009   | 5     | 89.5                             | 2005              | Vital Registration                                                                                                          | 100.0            | 10.5                      |                                             |
| Venezuela            | 2010-2017   | 5     | 88.9                             | 2011              | Vital Registration                                                                                                          | 100.0            | 11.1                      |                                             |
| Vietnam              | 1980-1984   | 0     |                                  |                   |                                                                                                                             |                  |                           |                                             |
| Vietnam              | 1985-1989   | 1     | 0.7                              | 1987              | Are there social inequities in child morbidity and mortality in rural Vietnam                                               |                  | 52.4                      | 1.5                                         |
| Vietnam              | 1990-1994   | 1     | 0.2                              | 1994              | Maternal mortality in Vietnam in 1994-95                                                                                    |                  | 77.6                      | 1.0                                         |
| Vietnam              | 1995-1999   | 1     | 1.3                              | 1999              | Applying verbal autopsy to determine cause of death in rural Vietnam                                                        |                  | 79.9                      | 6.4                                         |
| Vietnam              | 2000-2004   | 1     | 0.9                              | 2001              | Socio-economic status inequality and major causes of death in adults: a 5-year follow-up study in rural Vietnam             |                  | 84.5                      | 5.7                                         |
| Vietnam              | 2005-2009   | 3     | 62.0                             | 2008              | Mortality measures from sample-based surveillance: evidence of the epidemiological transition in Viet Nam, Unpublished data |                  | 3.1                       | 64.0                                        |
| Vietnam              | 2010-2017   | 1     | 4.8                              | 2010              | The causes of deaths in Chililab between 2008-2010 based on verbal autopsy method                                           |                  | 24.3                      | 6.4                                         |
| Virgin Islands       | 1980-1984   | 4     | 82.0                             | 1980              | Vital Registration                                                                                                          | 100.0            | 18.0                      |                                             |
| Virgin Islands       | 1985-1989   | 0     |                                  |                   |                                                                                                                             |                  |                           |                                             |
| Virgin Islands       | 1990-1994   | 5     | 90.6                             | 1994              | Vital Registration                                                                                                          | 100.0            | 9.4                       |                                             |
| Virgin Islands       | 1995-1999   | 5     | 90.5                             | 1995              | Vital Registration                                                                                                          | 100.0            | 9.5                       |                                             |
| Virgin Islands       | 2000-2004   | 4     | 84.1                             | 2000              | Vital Registration                                                                                                          | 94.5             | 11.0                      |                                             |
| Virgin Islands       | 2005-2009   | 4     | 81.9                             | 2007              | Vital Registration                                                                                                          | 90.5             | 9.5                       |                                             |
| Virgin Islands       | 2010-2017   | 4     | 74.0                             | 2010              | Vital Registration                                                                                                          | 86.6             | 14.5                      |                                             |
| Yemen                | 1980-1984   | 0     |                                  |                   |                                                                                                                             |                  |                           |                                             |
| Yemen                | 1985-1989   | 0     |                                  |                   |                                                                                                                             |                  |                           |                                             |
| Yemen                | 1990-1994   | 0     |                                  |                   |                                                                                                                             |                  |                           |                                             |
| Yemen                | 1995-1999   | 0     |                                  |                   |                                                                                                                             |                  |                           |                                             |
| Yemen                | 2000-2004   | 0     |                                  |                   |                                                                                                                             |                  |                           |                                             |
| Yemen                | 2005-2009   | 0     |                                  |                   |                                                                                                                             |                  |                           |                                             |
| Yemen                | 2010-2017   | 0     |                                  |                   |                                                                                                                             |                  |                           |                                             |
| Zambia               | 1980-1984   | 0     |                                  |                   |                                                                                                                             |                  |                           |                                             |
| Zambia               | 1985-1989   | 0     |                                  |                   |                                                                                                                             |                  |                           |                                             |
| Zambia               | 1990-1994   | 0     |                                  |                   |                                                                                                                             |                  |                           |                                             |

**Appendix Table 8. Underlying indicators for percent well-certified for data source with maximum percent well certified in each 5-year time interval for 195 countries, 1980-2017**

| Country  | Time Window | Stars | Percent Well-Certified [PWC] (%) | Max PWC Data Year | Max PWC Data Source                                                                                                                                                                                                          | Completeness (%) | Percent Major Garbage (%) | Verbal Autopsy Adjustment (None for VR) (%) |
|----------|-------------|-------|----------------------------------|-------------------|------------------------------------------------------------------------------------------------------------------------------------------------------------------------------------------------------------------------------|------------------|---------------------------|---------------------------------------------|
| Zambia   | 1995-1999   | 0     |                                  |                   |                                                                                                                                                                                                                              |                  |                           |                                             |
| Zambia   | 2000-2004   | 0     |                                  |                   |                                                                                                                                                                                                                              |                  |                           |                                             |
| Zambia   | 2005-2009   | 1     | 6.3                              | 2009              | Zambia Sample Vital Registration with Verbal Autopsy (SAVVY) Data 2010                                                                                                                                                       |                  | 1.0                       | 6.4                                         |
| Zambia   | 2010-2017   | 1     | 9.5                              | 2011              | Adult Mortality in Sub-saharan Africa, Zambia: Where Do Adults Die?                                                                                                                                                          |                  | 42.7                      | 16.6                                        |
| Zimbabwe | 1980-1984   | 0     |                                  |                   |                                                                                                                                                                                                                              |                  |                           |                                             |
| Zimbabwe | 1985-1989   | 0     |                                  |                   |                                                                                                                                                                                                                              |                  |                           |                                             |
| Zimbabwe | 1990-1994   | 3     | 45.3                             | 1990              | Vital Registration                                                                                                                                                                                                           | 59.8             | 24.2                      |                                             |
| Zimbabwe | 1995-1999   | 4     | 74.2                             | 1995              | Vital Registration                                                                                                                                                                                                           | 100.0            | 25.8                      |                                             |
| Zimbabwe | 2000-2004   | 1     | 0.0                              | 2000              | Effect of HIV infection on pregnancy-related mortality in sub-Saharan Africa: secondary analyses of pooled community-based data from the network for Analysing Longitudinal Population-based HIV/AIDS data on Africa (ALPHA) |                  | 96.6                      | 0.5                                         |
| Zimbabwe | 2005-2009   | 3     | 45.3                             | 2007              | Vital Registration                                                                                                                                                                                                           | 55.0             | 17.7                      |                                             |
| Zimbabwe | 2010-2017   | 0     |                                  |                   |                                                                                                                                                                                                                              |                  |                           |                                             |

**Appendix Table 9: CODEm covariates used, level of covariate, and expected direction of covariate by cause, sex, and age**

*Covariates that CODEm did not select during the covariate selection process have no draw counts listed.*

| Cause                                         | Sex    | Age Start   | Age End   | Model Type | Direction | Level | Covariate Name                                         | Number of Draws |
|-----------------------------------------------|--------|-------------|-----------|------------|-----------|-------|--------------------------------------------------------|-----------------|
| Sexually transmitted infections excluding HIV | Female | 10-14 years | 95+ years | Data Rich  | 1         | 1     | Syphilis prevalence (proportion)                       | --              |
| Sexually transmitted infections excluding HIV | Female | 10-14 years | 95+ years | Data Rich  | -1        | 2     | Education (years per capita)                           | 57              |
| Sexually transmitted infections excluding HIV | Female | 10-14 years | 95+ years | Data Rich  | -1        | 2     | Health System Access (capped)                          | 57              |
| Sexually transmitted infections excluding HIV | Female | 10-14 years | 95+ years | Data Rich  | -1        | 2     | Healthcare access and quality index                    | 112             |
| Sexually transmitted infections excluding HIV | Female | 10-14 years | 95+ years | Data Rich  | -1        | 2     | Legality of Abortion                                   | 618             |
| Sexually transmitted infections excluding HIV | Female | 10-14 years | 95+ years | Data Rich  | 1         | 2     | Age-Specific Fertility Rate                            | --              |
| Sexually transmitted infections excluding HIV | Female | 10-14 years | 95+ years | Data Rich  | 1         | 2     | Total Fertility Rate                                   | --              |
| Sexually transmitted infections excluding HIV | Female | 10-14 years | 95+ years | Data Rich  | -1        | 3     | Antenatal Care (4 visits) Coverage (proportion)        | 138             |
| Sexually transmitted infections excluding HIV | Female | 10-14 years | 95+ years | Data Rich  | -1        | 3     | Antenatal Care (1 visit) Coverage (proportion)         | 531             |
| Sexually transmitted infections excluding HIV | Female | 10-14 years | 95+ years | Data Rich  | -1        | 3     | LDI (1\$ per capita)                                   | --              |
| Sexually transmitted infections excluding HIV | Female | 10-14 years | 95+ years | Global     | 1         | 1     | Syphilis prevalence (proportion)                       | --              |
| Sexually transmitted infections excluding HIV | Female | 10-14 years | 95+ years | Global     | -1        | 2     | Education (years per capita)                           | 59              |
| Sexually transmitted infections excluding HIV | Female | 10-14 years | 95+ years | Global     | -1        | 2     | Health System Access (capped)                          | 59              |
| Sexually transmitted infections excluding HIV | Female | 10-14 years | 95+ years | Global     | -1        | 2     | Healthcare access and quality index                    | 284             |
| Sexually transmitted infections excluding HIV | Female | 10-14 years | 95+ years | Global     | -1        | 2     | Legality of Abortion                                   | 343             |
| Sexually transmitted infections excluding HIV | Female | 10-14 years | 95+ years | Global     | 1         | 2     | Age-Specific Fertility Rate                            | --              |
| Sexually transmitted infections excluding HIV | Female | 10-14 years | 95+ years | Global     | 1         | 2     | Total Fertility Rate                                   | --              |
| Sexually transmitted infections excluding HIV | Female | 10-14 years | 95+ years | Global     | -1        | 3     | Antenatal Care (1 visit) Coverage (proportion)         | 336             |
| Sexually transmitted infections excluding HIV | Female | 10-14 years | 95+ years | Global     | -1        | 3     | Antenatal Care (4 visits) Coverage (proportion)        | 359             |
| Sexually transmitted infections excluding HIV | Female | 10-14 years | 95+ years | Global     | -1        | 3     | LDI (1\$ per capita)                                   | --              |
| Sexually transmitted infections excluding HIV | Male   | 10-14 years | 95+ years | Data Rich  | 1         | 1     | Syphilis prevalence (proportion)                       | --              |
| Sexually transmitted infections excluding HIV | Male   | 10-14 years | 95+ years | Data Rich  | -1        | 2     | Healthcare access and quality index                    | 404             |
| Sexually transmitted infections excluding HIV | Male   | 10-14 years | 95+ years | Data Rich  | -1        | 2     | Education (years per capita)                           | 449             |
| Sexually transmitted infections excluding HIV | Male   | 10-14 years | 95+ years | Data Rich  | -1        | 2     | Legality of Abortion                                   | 643             |
| Sexually transmitted infections excluding HIV | Male   | 10-14 years | 95+ years | Data Rich  | -1        | 2     | Health System Access (capped)                          | 788             |
| Sexually transmitted infections excluding HIV | Male   | 10-14 years | 95+ years | Data Rich  | 1         | 2     | Age-Specific Fertility Rate                            | --              |
| Sexually transmitted infections excluding HIV | Male   | 10-14 years | 95+ years | Data Rich  | 1         | 2     | Total Fertility Rate                                   | --              |
| Sexually transmitted infections excluding HIV | Male   | 10-14 years | 95+ years | Data Rich  | -1        | 3     | Antenatal Care (1 visit) Coverage (proportion)         | 175             |
| Sexually transmitted infections excluding HIV | Male   | 10-14 years | 95+ years | Data Rich  | -1        | 3     | Antenatal Care (4 visits) Coverage (proportion)        | 221             |
| Sexually transmitted infections excluding HIV | Male   | 10-14 years | 95+ years | Data Rich  | -1        | 3     | LDI (1\$ per capita)                                   | --              |
| Sexually transmitted infections excluding HIV | Male   | 10-14 years | 95+ years | Global     | 1         | 1     | Syphilis prevalence (proportion)                       | --              |
| Sexually transmitted infections excluding HIV | Male   | 10-14 years | 95+ years | Global     | -1        | 2     | Education (years per capita)                           | 385             |
| Sexually transmitted infections excluding HIV | Male   | 10-14 years | 95+ years | Global     | -1        | 2     | Healthcare access and quality index                    | 385             |
| Sexually transmitted infections excluding HIV | Male   | 10-14 years | 95+ years | Global     | -1        | 2     | Legality of Abortion                                   | 385             |
| Sexually transmitted infections excluding HIV | Male   | 10-14 years | 95+ years | Global     | -1        | 2     | Health System Access (capped)                          | 647             |
| Sexually transmitted infections excluding HIV | Male   | 10-14 years | 95+ years | Global     | 1         | 2     | Age-Specific Fertility Rate                            | --              |
| Sexually transmitted infections excluding HIV | Male   | 10-14 years | 95+ years | Global     | 1         | 2     | Total Fertility Rate                                   | --              |
| Sexually transmitted infections excluding HIV | Male   | 10-14 years | 95+ years | Global     | -1        | 3     | Antenatal Care (4 visits) Coverage (proportion)        | 99              |
| Sexually transmitted infections excluding HIV | Male   | 10-14 years | 95+ years | Global     | -1        | 3     | Antenatal Care (1 visit) Coverage (proportion)         | 335             |
| Sexually transmitted infections excluding HIV | Male   | 10-14 years | 95+ years | Global     | -1        | 3     | LDI (1\$ per capita)                                   | --              |
| Lower respiratory infections                  | Female | 0-6 days    | 1-4 years | Data Rich  | -1        | 1     | Antibiotics for LRI                                    | 94              |
| Lower respiratory infections                  | Female | 0-6 days    | 1-4 years | Data Rich  | -1        | 1     | PCV3 Coverage (proportion)                             | 401             |
| Lower respiratory infections                  | Female | 0-6 days    | 1-4 years | Data Rich  | -1        | 1     | Hib3 Vaccine Coverage (proportion)                     | 506             |
| Lower respiratory infections                  | Female | 0-6 days    | 1-4 years | Data Rich  | 1         | 1     | Age- and sex-specific wasting (weight-for-height) SEV  | 38              |
| Lower respiratory infections                  | Female | 0-6 days    | 1-4 years | Data Rich  | 1         | 1     | Age- and sex-specific stunting (height-for-age) SEV    | 80              |
| Lower respiratory infections                  | Female | 0-6 days    | 1-4 years | Data Rich  | 1         | 1     | Indoor Air Pollution (All Cooking Fuels)               | 208             |
| Lower respiratory infections                  | Female | 0-6 days    | 1-4 years | Data Rich  | 1         | 1     | Age- and sex-specific underweight (weight-for-age) SEV | 326             |
| Lower respiratory infections                  | Female | 0-6 days    | 1-4 years | Data Rich  | 1         | 1     | Short gestation SEV (all ages, by sex)                 | 328             |
| Lower respiratory infections                  | Female | 0-6 days    | 1-4 years | Data Rich  | 1         | 1     | Low birth weight SEV (all ages, by sex)                | 384             |
| Lower respiratory infections                  | Female | 0-6 days    | 1-4 years | Data Rich  | 1         | 1     | Log-transformed SEV scalar: LRI                        | 918             |
| Lower respiratory infections                  | Female | 0-6 days    | 1-4 years | Data Rich  | -1        | 2     | Healthcare access and quality index                    | 126             |
| Lower respiratory infections                  | Female | 0-6 days    | 1-4 years | Data Rich  | -1        | 2     | DTP3 Coverage (proportion)                             | 407             |
| Lower respiratory infections                  | Female | 0-6 days    | 1-4 years | Data Rich  | 1         | 2     | Zinc deficiency                                        | 0               |
| Lower respiratory infections                  | Female | 0-6 days    | 1-4 years | Data Rich  | 1         | 2     | Vitamin A Deficiency Prevalence (age-standardized)     | 145             |
| Lower respiratory infections                  | Female | 0-6 days    | 1-4 years | Data Rich  | 1         | 2     | Secondhand smoke                                       | 330             |
| Lower respiratory infections                  | Female | 0-6 days    | 1-4 years | Data Rich  | 1         | 2     | Outdoor Air Pollution (PM2.5)                          | 382             |
| Lower respiratory infections                  | Female | 0-6 days    | 1-4 years | Data Rich  | 1         | 2     | Discontinued breastfeeding SEV                         | --              |
| Lower respiratory infections                  | Female | 0-6 days    | 1-4 years | Data Rich  | -1        | 3     | Maternal Education (years per capita)                  | 0               |
| Lower respiratory infections                  | Female | 0-6 days    | 1-4 years | Data Rich  | -1        | 3     | Socio-demographic Index                                | 90              |
| Lower respiratory infections                  | Female | 0-6 days    | 1-4 years | Data Rich  | 1         | 3     | Population Density (over 1000 ppl/sqkm, proportion)    | 38              |
| Lower respiratory infections                  | Female | 0-6 days    | 1-4 years | Data Rich  | 1         | 3     | No access to handwashing facility                      | 404             |
| Lower respiratory infections                  | Female | 0-6 days    | 1-4 years | Data Rich  | 1         | 3     | SEV unsafe sanitation                                  | 596             |
| Lower respiratory infections                  | Female | 0-6 days    | 1-4 years | Global     | -1        | 1     | Hib3 Vaccine Coverage (proportion)                     | 259             |
| Lower respiratory infections                  | Female | 0-6 days    | 1-4 years | Global     | -1        | 1     | Antibiotics for LRI                                    | 389             |
| Lower respiratory infections                  | Female | 0-6 days    | 1-4 years | Global     | -1        | 1     | PCV3 Coverage (proportion)                             | 428             |
| Lower respiratory infections                  | Female | 0-6 days    | 1-4 years | Global     | 1         | 1     | Short gestation SEV (all ages, by sex)                 | 143             |
| Lower respiratory infections                  | Female | 0-6 days    | 1-4 years | Global     | 1         | 1     | Age- and sex-specific stunting (height-for-age) SEV    | 287             |
| Lower respiratory infections                  | Female | 0-6 days    | 1-4 years | Global     | 1         | 1     | Indoor Air Pollution (All Cooking Fuels)               | 290             |
| Lower respiratory infections                  | Female | 0-6 days    | 1-4 years | Global     | 1         | 1     | Age- and sex-specific underweight (weight-for-age) SEV | 321             |
| Lower respiratory infections                  | Female | 0-6 days    | 1-4 years | Global     | 1         | 1     | Age- and sex-specific wasting (weight-for-height) SEV  | 326             |
| Lower respiratory infections                  | Female | 0-6 days    | 1-4 years | Global     | 1         | 1     | Low birth weight SEV (all ages, by sex)                | 382             |
| Lower respiratory infections                  | Female | 0-6 days    | 1-4 years | Global     | 1         | 1     | Log-transformed SEV scalar: LRI                        | 855             |
| Lower respiratory infections                  | Female | 0-6 days    | 1-4 years | Global     | -1        | 2     | Healthcare access and quality index                    | 4               |
| Lower respiratory infections                  | Female | 0-6 days    | 1-4 years | Global     | -1        | 2     | DTP3 Coverage (proportion)                             | 69              |
| Lower respiratory infections                  | Female | 0-6 days    | 1-4 years | Global     | 1         | 2     | Vitamin A Deficiency Prevalence (age-standardized)     | 3               |
| Lower respiratory infections                  | Female | 0-6 days    | 1-4 years | Global     | 1         | 2     | Secondhand smoke                                       | 34              |
| Lower respiratory infections                  | Female | 0-6 days    | 1-4 years | Global     | 1         | 2     | Zinc deficiency                                        | 77              |
| Lower respiratory infections                  | Female | 0-6 days    | 1-4 years | Global     | 1         | 2     | Discontinued breastfeeding SEV                         | --              |

**Appendix Table 9: CODEm covariates used, level of covariate, and expected direction of covariate by cause, sex, and age**

*Covariates that CODEm did not select during the covariate selection process have no draw counts listed.*

| Cause                        | Sex    | Age Start | Age End   | Model Type | Direction | Level | Covariate Name                                         | Number of Draws |
|------------------------------|--------|-----------|-----------|------------|-----------|-------|--------------------------------------------------------|-----------------|
| Lower respiratory infections | Female | 0-6 days  | 1-4 years | Global     | 1         | 2     | Outdoor Air Pollution (PM2.5)                          | --              |
| Lower respiratory infections | Female | 0-6 days  | 1-4 years | Global     | -1        | 3     | Socio-demographic Index                                | 375             |
| Lower respiratory infections | Female | 0-6 days  | 1-4 years | Global     | -1        | 3     | Maternal Education (years per capita)                  | 385             |
| Lower respiratory infections | Female | 0-6 days  | 1-4 years | Global     | 1         | 3     | No access to handwashing facility                      | 381             |
| Lower respiratory infections | Female | 0-6 days  | 1-4 years | Global     | 1         | 3     | SEV unsafe sanitation                                  | 553             |
| Lower respiratory infections | Female | 0-6 days  | 1-4 years | Global     | 1         | 3     | Population Density (over 1000 ppl/sqkm, proportion)    | --              |
| Lower respiratory infections | Female | 5-9 years | 95+ years | Data Rich  | 1         | 1     | Secondhand smoke                                       | 3               |
| Lower respiratory infections | Female | 5-9 years | 95+ years | Data Rich  | 1         | 1     | Log-transformed SEV scalar: LRI                        | 5               |
| Lower respiratory infections | Female | 5-9 years | 95+ years | Data Rich  | 1         | 1     | Outdoor Air Pollution (PM2.5)                          | 19              |
| Lower respiratory infections | Female | 5-9 years | 95+ years | Data Rich  | 1         | 1     | Smoking Prevalence                                     | 562             |
| Lower respiratory infections | Female | 5-9 years | 95+ years | Data Rich  | 1         | 1     | Indoor Air Pollution (All Cooking Fuels)               | 828             |
| Lower respiratory infections | Female | 5-9 years | 95+ years | Data Rich  | -1        | 2     | Mean BMI                                               | 1               |
| Lower respiratory infections | Female | 5-9 years | 95+ years | Data Rich  | -1        | 2     | DTP3 Coverage (proportion)                             | 51              |
| Lower respiratory infections | Female | 5-9 years | 95+ years | Data Rich  | -1        | 2     | Healthcare access and quality index                    | 52              |
| Lower respiratory infections | Female | 5-9 years | 95+ years | Data Rich  | -1        | 2     | PCV3 Coverage (proportion)                             | --              |
| Lower respiratory infections | Female | 5-9 years | 95+ years | Data Rich  | 1         | 2     | No access to handwashing facility                      | 346             |
| Lower respiratory infections | Female | 5-9 years | 95+ years | Data Rich  | -1        | 3     | Socio-demographic Index                                | 28              |
| Lower respiratory infections | Female | 5-9 years | 95+ years | Data Rich  | -1        | 3     | Education (years per capita)                           | 35              |
| Lower respiratory infections | Female | 5-9 years | 95+ years | Data Rich  | -1        | 3     | LDI (IS per capita)                                    | --              |
| Lower respiratory infections | Female | 5-9 years | 95+ years | Data Rich  | 1         | 3     | SEV unsafe sanitation                                  | 45              |
| Lower respiratory infections | Female | 5-9 years | 95+ years | Data Rich  | 1         | 3     | Alcohol (liters per capita)                            | 520             |
| Lower respiratory infections | Female | 5-9 years | 95+ years | Global     | 1         | 1     | Secondhand smoke                                       | 3               |
| Lower respiratory infections | Female | 5-9 years | 95+ years | Global     | 1         | 1     | Indoor Air Pollution (All Cooking Fuels)               | 7               |
| Lower respiratory infections | Female | 5-9 years | 95+ years | Global     | 1         | 1     | Log-transformed SEV scalar: LRI                        | 116             |
| Lower respiratory infections | Female | 5-9 years | 95+ years | Global     | 1         | 1     | Smoking Prevalence                                     | 879             |
| Lower respiratory infections | Female | 5-9 years | 95+ years | Global     | 1         | 1     | Outdoor Air Pollution (PM2.5)                          | --              |
| Lower respiratory infections | Female | 5-9 years | 95+ years | Global     | -1        | 2     | DTP3 Coverage (proportion)                             | 0               |
| Lower respiratory infections | Female | 5-9 years | 95+ years | Global     | -1        | 2     | PCV3 Coverage (proportion)                             | 72              |
| Lower respiratory infections | Female | 5-9 years | 95+ years | Global     | -1        | 2     | Mean BMI                                               | 191             |
| Lower respiratory infections | Female | 5-9 years | 95+ years | Global     | -1        | 2     | Healthcare access and quality index                    | 296             |
| Lower respiratory infections | Female | 5-9 years | 95+ years | Global     | 1         | 2     | No access to handwashing facility                      | 254             |
| Lower respiratory infections | Female | 5-9 years | 95+ years | Global     | -1        | 3     | Education (years per capita)                           | 0               |
| Lower respiratory infections | Female | 5-9 years | 95+ years | Global     | -1        | 3     | Socio-demographic Index                                | 100             |
| Lower respiratory infections | Female | 5-9 years | 95+ years | Global     | -1        | 3     | LDI (IS per capita)                                    | --              |
| Lower respiratory infections | Female | 5-9 years | 95+ years | Global     | 1         | 3     | SEV unsafe sanitation                                  | 287             |
| Lower respiratory infections | Female | 5-9 years | 95+ years | Global     | 1         | 3     | Alcohol (liters per capita)                            | 655             |
| Lower respiratory infections | Male   | 0-6 days  | 1-4 years | Data Rich  | -1        | 1     | Antibiotics for LRI                                    | 119             |
| Lower respiratory infections | Male   | 0-6 days  | 1-4 years | Data Rich  | -1        | 1     | PCV3 Coverage (proportion)                             | 268             |
| Lower respiratory infections | Male   | 0-6 days  | 1-4 years | Data Rich  | -1        | 1     | Hib3 Vaccine Coverage (proportion)                     | 421             |
| Lower respiratory infections | Male   | 0-6 days  | 1-4 years | Data Rich  | 1         | 1     | Indoor Air Pollution (All Cooking Fuels)               | 0               |
| Lower respiratory infections | Male   | 0-6 days  | 1-4 years | Data Rich  | 1         | 1     | Age- and sex-specific stunting (height-for-age) SEV    | 172             |
| Lower respiratory infections | Male   | 0-6 days  | 1-4 years | Data Rich  | 1         | 1     | Low birth weight SEV (all ages, by sex)                | 179             |
| Lower respiratory infections | Male   | 0-6 days  | 1-4 years | Data Rich  | 1         | 1     | Age- and sex-specific wasting (weight-for-height) SEV  | 259             |
| Lower respiratory infections | Male   | 0-6 days  | 1-4 years | Data Rich  | 1         | 1     | Short gestation SEV (all ages, by sex)                 | 270             |
| Lower respiratory infections | Male   | 0-6 days  | 1-4 years | Data Rich  | 1         | 1     | Age- and sex-specific underweight (weight-for-age) SEV | 292             |
| Lower respiratory infections | Male   | 0-6 days  | 1-4 years | Data Rich  | 1         | 1     | Log-transformed SEV scalar: LRI                        | 997             |
| Lower respiratory infections | Male   | 0-6 days  | 1-4 years | Data Rich  | -1        | 2     | DTP3 Coverage (proportion)                             | 254             |
| Lower respiratory infections | Male   | 0-6 days  | 1-4 years | Data Rich  | -1        | 2     | Healthcare access and quality index                    | 338             |
| Lower respiratory infections | Male   | 0-6 days  | 1-4 years | Data Rich  | 1         | 2     | Zinc deficiency                                        | 0               |
| Lower respiratory infections | Male   | 0-6 days  | 1-4 years | Data Rich  | 1         | 2     | Vitamin A Deficiency Prevalence (age-standardized)     | 3               |
| Lower respiratory infections | Male   | 0-6 days  | 1-4 years | Data Rich  | 1         | 2     | Discontinued breastfeeding SEV                         | 366             |
| Lower respiratory infections | Male   | 0-6 days  | 1-4 years | Data Rich  | 1         | 2     | Secondhand smoke                                       | 563             |
| Lower respiratory infections | Male   | 0-6 days  | 1-4 years | Data Rich  | 1         | 2     | Outdoor Air Pollution (PM2.5)                          | 638             |
| Lower respiratory infections | Male   | 0-6 days  | 1-4 years | Data Rich  | -1        | 3     | Maternal Education (years per capita)                  | 66              |
| Lower respiratory infections | Male   | 0-6 days  | 1-4 years | Data Rich  | -1        | 3     | Socio-demographic Index                                | 232             |
| Lower respiratory infections | Male   | 0-6 days  | 1-4 years | Data Rich  | 1         | 3     | Population Density (over 1000 ppl/sqkm, proportion)    | 558             |
| Lower respiratory infections | Male   | 0-6 days  | 1-4 years | Data Rich  | 1         | 3     | No access to handwashing facility                      | 679             |
| Lower respiratory infections | Male   | 0-6 days  | 1-4 years | Data Rich  | 1         | 3     | SEV unsafe sanitation                                  | 771             |
| Lower respiratory infections | Male   | 0-6 days  | 1-4 years | Global     | -1        | 1     | Hib3 Vaccine Coverage (proportion)                     | 269             |
| Lower respiratory infections | Male   | 0-6 days  | 1-4 years | Global     | -1        | 1     | Antibiotics for LRI                                    | 408             |
| Lower respiratory infections | Male   | 0-6 days  | 1-4 years | Global     | -1        | 1     | PCV3 Coverage (proportion)                             | 754             |
| Lower respiratory infections | Male   | 0-6 days  | 1-4 years | Global     | 1         | 1     | Indoor Air Pollution (All Cooking Fuels)               | 159             |
| Lower respiratory infections | Male   | 0-6 days  | 1-4 years | Global     | 1         | 1     | Short gestation SEV (all ages, by sex)                 | 185             |
| Lower respiratory infections | Male   | 0-6 days  | 1-4 years | Global     | 1         | 1     | Age- and sex-specific underweight (weight-for-age) SEV | 203             |
| Lower respiratory infections | Male   | 0-6 days  | 1-4 years | Global     | 1         | 1     | Age- and sex-specific wasting (weight-for-height) SEV  | 354             |
| Lower respiratory infections | Male   | 0-6 days  | 1-4 years | Global     | 1         | 1     | Age- and sex-specific stunting (height-for-age) SEV    | 392             |
| Lower respiratory infections | Male   | 0-6 days  | 1-4 years | Global     | 1         | 1     | Low birth weight SEV (all ages, by sex)                | 423             |
| Lower respiratory infections | Male   | 0-6 days  | 1-4 years | Global     | 1         | 1     | Log-transformed SEV scalar: LRI                        | 1000            |
| Lower respiratory infections | Male   | 0-6 days  | 1-4 years | Global     | -1        | 2     | Healthcare access and quality index                    | 0               |
| Lower respiratory infections | Male   | 0-6 days  | 1-4 years | Global     | -1        | 2     | DTP3 Coverage (proportion)                             | 3               |
| Lower respiratory infections | Male   | 0-6 days  | 1-4 years | Global     | 1         | 2     | Outdoor Air Pollution (PM2.5)                          | 0               |
| Lower respiratory infections | Male   | 0-6 days  | 1-4 years | Global     | 1         | 2     | Secondhand smoke                                       | 0               |
| Lower respiratory infections | Male   | 0-6 days  | 1-4 years | Global     | 1         | 2     | Vitamin A Deficiency Prevalence (age-standardized)     | 0               |
| Lower respiratory infections | Male   | 0-6 days  | 1-4 years | Global     | 1         | 2     | Zinc deficiency                                        | 3               |
| Lower respiratory infections | Male   | 0-6 days  | 1-4 years | Global     | 1         | 2     | Discontinued breastfeeding SEV                         | --              |
| Lower respiratory infections | Male   | 0-6 days  | 1-4 years | Global     | -1        | 3     | Socio-demographic Index                                | 310             |
| Lower respiratory infections | Male   | 0-6 days  | 1-4 years | Global     | -1        | 3     | Maternal Education (years per capita)                  | 353             |
| Lower respiratory infections | Male   | 0-6 days  | 1-4 years | Global     | 1         | 3     | No access to handwashing facility                      | 403             |

**Appendix Table 9: CODEm covariates used, level of covariate, and expected direction of covariate by cause, sex, and age**

*Covariates that CODEm did not select during the covariate selection process have no draw counts listed.*

| Cause                        | Sex    | Age Start | Age End   | Model Type | Direction | Level | Covariate Name                                      | Number of Draws |
|------------------------------|--------|-----------|-----------|------------|-----------|-------|-----------------------------------------------------|-----------------|
| Lower respiratory infections | Male   | 0-6 days  | 1-4 years | Global     | 1         | 3     | SEV unsafe sanitation                               | 812             |
| Lower respiratory infections | Male   | 0-6 days  | 1-4 years | Global     | 1         | 3     | Population Density (over 1000 ppl/sqkm, proportion) | --              |
| Lower respiratory infections | Male   | 5-9 years | 95+ years | Data Rich  | 1         | 1     | Outdoor Air Pollution (PM2.5)                       | 0               |
| Lower respiratory infections | Male   | 5-9 years | 95+ years | Data Rich  | 1         | 1     | Log-transformed SEV scalar: LRI                     | 61              |
| Lower respiratory infections | Male   | 5-9 years | 95+ years | Data Rich  | 1         | 1     | Smoking Prevalence                                  | 326             |
| Lower respiratory infections | Male   | 5-9 years | 95+ years | Data Rich  | 1         | 1     | Indoor Air Pollution (All Cooking Fuels)            | 699             |
| Lower respiratory infections | Male   | 5-9 years | 95+ years | Data Rich  | 1         | 1     | Secondhand smoke                                    | 730             |
| Lower respiratory infections | Male   | 5-9 years | 95+ years | Data Rich  | -1        | 2     | Healthcare access and quality index                 | 16              |
| Lower respiratory infections | Male   | 5-9 years | 95+ years | Data Rich  | -1        | 2     | DTP3 Coverage (proportion)                          | 56              |
| Lower respiratory infections | Male   | 5-9 years | 95+ years | Data Rich  | -1        | 2     | PCV3 Coverage (proportion)                          | 125             |
| Lower respiratory infections | Male   | 5-9 years | 95+ years | Data Rich  | -1        | 2     | Mean BMI                                            | 141             |
| Lower respiratory infections | Male   | 5-9 years | 95+ years | Data Rich  | 1         | 2     | No access to handwashing facility                   | 1               |
| Lower respiratory infections | Male   | 5-9 years | 95+ years | Data Rich  | -1        | 3     | Socio-demographic Index                             | 35              |
| Lower respiratory infections | Male   | 5-9 years | 95+ years | Data Rich  | -1        | 3     | Education (years per capita)                        | 95              |
| Lower respiratory infections | Male   | 5-9 years | 95+ years | Data Rich  | -1        | 3     | LDI (US\$ per capita)                               | --              |
| Lower respiratory infections | Male   | 5-9 years | 95+ years | Data Rich  | 1         | 3     | SEV unsafe sanitation                               | 1               |
| Lower respiratory infections | Male   | 5-9 years | 95+ years | Data Rich  | 1         | 3     | Alcohol (liters per capita)                         | 491             |
| Lower respiratory infections | Male   | 5-9 years | 95+ years | Global     | 1         | 1     | Smoking Prevalence                                  | 5               |
| Lower respiratory infections | Male   | 5-9 years | 95+ years | Global     | 1         | 1     | Log-transformed SEV scalar: LRI                     | 6               |
| Lower respiratory infections | Male   | 5-9 years | 95+ years | Global     | 1         | 1     | Secondhand smoke                                    | 577             |
| Lower respiratory infections | Male   | 5-9 years | 95+ years | Global     | 1         | 1     | Indoor Air Pollution (All Cooking Fuels)            | 647             |
| Lower respiratory infections | Male   | 5-9 years | 95+ years | Global     | 1         | 1     | Outdoor Air Pollution (PM2.5)                       | --              |
| Lower respiratory infections | Male   | 5-9 years | 95+ years | Global     | -1        | 2     | DTP3 Coverage (proportion)                          | 3               |
| Lower respiratory infections | Male   | 5-9 years | 95+ years | Global     | -1        | 2     | Mean BMI                                            | 8               |
| Lower respiratory infections | Male   | 5-9 years | 95+ years | Global     | -1        | 2     | Healthcare access and quality index                 | 21              |
| Lower respiratory infections | Male   | 5-9 years | 95+ years | Global     | -1        | 2     | PCV3 Coverage (proportion)                          | 331             |
| Lower respiratory infections | Male   | 5-9 years | 95+ years | Global     | 1         | 2     | No access to handwashing facility                   | 0               |
| Lower respiratory infections | Male   | 5-9 years | 95+ years | Global     | -1        | 3     | Socio-demographic Index                             | 1               |
| Lower respiratory infections | Male   | 5-9 years | 95+ years | Global     | -1        | 3     | Education (years per capita)                        | 2               |
| Lower respiratory infections | Male   | 5-9 years | 95+ years | Global     | -1        | 3     | LDI (US\$ per capita)                               | --              |
| Lower respiratory infections | Male   | 5-9 years | 95+ years | Global     | 1         | 3     | SEV unsafe sanitation                               | 46              |
| Lower respiratory infections | Male   | 5-9 years | 95+ years | Global     | 1         | 3     | Alcohol (liters per capita)                         | 624             |
| Upper respiratory infections | Female | 0-6 days  | 95+ years | Data Rich  | 1         | 1     | Smoking Prevalence                                  | 1000            |
| Upper respiratory infections | Female | 0-6 days  | 95+ years | Data Rich  | -1        | 2     | Healthcare access and quality index                 | --              |
| Upper respiratory infections | Female | 0-6 days  | 95+ years | Data Rich  | 1         | 2     | Indoor Air Pollution (All Cooking Fuels)            | 488             |
| Upper respiratory infections | Female | 0-6 days  | 95+ years | Data Rich  | 1         | 2     | Outdoor Air Pollution (PM2.5)                       | 488             |
| Upper respiratory infections | Female | 0-6 days  | 95+ years | Data Rich  | -1        | 3     | Socio-demographic Index                             | 145             |
| Upper respiratory infections | Female | 0-6 days  | 95+ years | Data Rich  | -1        | 3     | Education (years per capita)                        | --              |
| Upper respiratory infections | Female | 0-6 days  | 95+ years | Data Rich  | -1        | 3     | LDI (US\$ per capita)                               | --              |
| Upper respiratory infections | Female | 0-6 days  | 95+ years | Global     | 1         | 1     | Smoking Prevalence                                  | 1000            |
| Upper respiratory infections | Female | 0-6 days  | 95+ years | Global     | -1        | 2     | Healthcare access and quality index                 | --              |
| Upper respiratory infections | Female | 0-6 days  | 95+ years | Global     | 1         | 2     | Indoor Air Pollution (All Cooking Fuels)            | 356             |
| Upper respiratory infections | Female | 0-6 days  | 95+ years | Global     | 1         | 2     | Outdoor Air Pollution (PM2.5)                       | --              |
| Upper respiratory infections | Female | 0-6 days  | 95+ years | Global     | -1        | 3     | Socio-demographic Index                             | 160             |
| Upper respiratory infections | Female | 0-6 days  | 95+ years | Global     | -1        | 3     | Education (years per capita)                        | --              |
| Upper respiratory infections | Female | 0-6 days  | 95+ years | Global     | -1        | 3     | LDI (US\$ per capita)                               | --              |
| Upper respiratory infections | Male   | 0-6 days  | 95+ years | Data Rich  | 1         | 1     | Smoking Prevalence                                  | 1000            |
| Upper respiratory infections | Male   | 0-6 days  | 95+ years | Data Rich  | -1        | 2     | Healthcare access and quality index                 | 324             |
| Upper respiratory infections | Male   | 0-6 days  | 95+ years | Data Rich  | 1         | 2     | Indoor Air Pollution (All Cooking Fuels)            | 351             |
| Upper respiratory infections | Male   | 0-6 days  | 95+ years | Data Rich  | 1         | 2     | Outdoor Air Pollution (PM2.5)                       | --              |
| Upper respiratory infections | Male   | 0-6 days  | 95+ years | Data Rich  | -1        | 3     | Socio-demographic Index                             | 151             |
| Upper respiratory infections | Male   | 0-6 days  | 95+ years | Data Rich  | -1        | 3     | Education (years per capita)                        | 751             |
| Upper respiratory infections | Male   | 0-6 days  | 95+ years | Data Rich  | -1        | 3     | LDI (US\$ per capita)                               | --              |
| Upper respiratory infections | Male   | 0-6 days  | 95+ years | Global     | 1         | 1     | Smoking Prevalence                                  | 1000            |
| Upper respiratory infections | Male   | 0-6 days  | 95+ years | Global     | -1        | 2     | Healthcare access and quality index                 | 336             |
| Upper respiratory infections | Male   | 0-6 days  | 95+ years | Global     | 1         | 2     | Indoor Air Pollution (All Cooking Fuels)            | 336             |
| Upper respiratory infections | Male   | 0-6 days  | 95+ years | Global     | 1         | 2     | Outdoor Air Pollution (PM2.5)                       | --              |
| Upper respiratory infections | Male   | 0-6 days  | 95+ years | Global     | -1        | 3     | Socio-demographic Index                             | 208             |
| Upper respiratory infections | Male   | 0-6 days  | 95+ years | Global     | -1        | 3     | Education (years per capita)                        | 328             |
| Upper respiratory infections | Male   | 0-6 days  | 95+ years | Global     | -1        | 3     | LDI (US\$ per capita)                               | --              |
| Otitis media                 | Female | 0-6 days  | 95+ years | Data Rich  | 1         | 1     | Log-transformed SEV scalar: Otitis                  | 556             |
| Otitis media                 | Female | 0-6 days  | 95+ years | Data Rich  | 1         | 1     | Smoking Prevalence                                  | 786             |
| Otitis media                 | Female | 0-6 days  | 95+ years | Data Rich  | -1        | 2     | Healthcare access and quality index                 | 940             |
| Otitis media                 | Female | 0-6 days  | 95+ years | Data Rich  | 1         | 2     | Indoor Air Pollution (All Cooking Fuels)            | 17              |
| Otitis media                 | Female | 0-6 days  | 95+ years | Data Rich  | 1         | 2     | Outdoor Air Pollution (PM2.5)                       | 209             |
| Otitis media                 | Female | 0-6 days  | 95+ years | Data Rich  | -1        | 3     | Socio-demographic Index                             | 40              |
| Otitis media                 | Female | 0-6 days  | 95+ years | Data Rich  | -1        | 3     | Education (years per capita)                        | 595             |
| Otitis media                 | Female | 0-6 days  | 95+ years | Data Rich  | -1        | 3     | LDI (US\$ per capita)                               | --              |
| Otitis media                 | Female | 0-6 days  | 95+ years | Global     | 1         | 1     | Log-transformed SEV scalar: Otitis                  | 303             |
| Otitis media                 | Female | 0-6 days  | 95+ years | Global     | 1         | 1     | Smoking Prevalence                                  | 889             |
| Otitis media                 | Female | 0-6 days  | 95+ years | Global     | -1        | 2     | Healthcare access and quality index                 | 641             |
| Otitis media                 | Female | 0-6 days  | 95+ years | Global     | 1         | 2     | Indoor Air Pollution (All Cooking Fuels)            | 175             |
| Otitis media                 | Female | 0-6 days  | 95+ years | Global     | 1         | 2     | Outdoor Air Pollution (PM2.5)                       | 361             |
| Otitis media                 | Female | 0-6 days  | 95+ years | Global     | -1        | 3     | Socio-demographic Index                             | 278             |
| Otitis media                 | Female | 0-6 days  | 95+ years | Global     | -1        | 3     | Education (years per capita)                        | 655             |
| Otitis media                 | Female | 0-6 days  | 95+ years | Global     | -1        | 3     | LDI (US\$ per capita)                               | --              |
| Otitis media                 | Male   | 0-6 days  | 95+ years | Data Rich  | 1         | 1     | Log-transformed SEV scalar: Otitis                  | 307             |
| Otitis media                 | Male   | 0-6 days  | 95+ years | Data Rich  | 1         | 1     | Smoking Prevalence                                  | 874             |

**Appendix Table 9: CODEm covariates used, level of covariate, and expected direction of covariate by cause, sex, and age**

*Covariates that CODEm did not select during the covariate selection process have no draw counts listed.*

| Cause               | Sex    | Age Start | Age End   | Model Type | Direction | Level | Covariate Name                                         | Number of Draws |
|---------------------|--------|-----------|-----------|------------|-----------|-------|--------------------------------------------------------|-----------------|
| Otitis media        | Male   | 0-6 days  | 95+ years | Data Rich  | -1        | 2     | Healthcare access and quality index                    | 913             |
| Otitis media        | Male   | 0-6 days  | 95+ years | Data Rich  | 1         | 2     | Indoor Air Pollution (All Cooking Fuels)               | 46              |
| Otitis media        | Male   | 0-6 days  | 95+ years | Data Rich  | 1         | 2     | Outdoor Air Pollution (PM2.5)                          | 812             |
| Otitis media        | Male   | 0-6 days  | 95+ years | Data Rich  | -1        | 3     | Socio-demographic Index                                | 66              |
| Otitis media        | Male   | 0-6 days  | 95+ years | Data Rich  | -1        | 3     | Education (years per capita)                           | 512             |
| Otitis media        | Male   | 0-6 days  | 95+ years | Data Rich  | -1        | 3     | LDI (IS per capita)                                    | --              |
| Otitis media        | Male   | 0-6 days  | 95+ years | Global     | 1         | 1     | Log-transformed SEV scalar: Otitis                     | 531             |
| Otitis media        | Male   | 0-6 days  | 95+ years | Global     | 1         | 1     | Smoking Prevalence                                     | 673             |
| Otitis media        | Male   | 0-6 days  | 95+ years | Global     | -1        | 2     | Healthcare access and quality index                    | 736             |
| Otitis media        | Male   | 0-6 days  | 95+ years | Global     | 1         | 2     | Indoor Air Pollution (All Cooking Fuels)               | 116             |
| Otitis media        | Male   | 0-6 days  | 95+ years | Global     | 1         | 2     | Outdoor Air Pollution (PM2.5)                          | 669             |
| Otitis media        | Male   | 0-6 days  | 95+ years | Global     | -1        | 3     | Socio-demographic Index                                | 170             |
| Otitis media        | Male   | 0-6 days  | 95+ years | Global     | -1        | 3     | Education (years per capita)                           | 467             |
| Otitis media        | Male   | 0-6 days  | 95+ years | Global     | -1        | 3     | LDI (IS per capita)                                    | --              |
| Diarrhoeal diseases | Female | 0-6 days  | 1-4 years | Data Rich  | -1        | 1     | Improved Water Source (proportion with access)         | 0               |
| Diarrhoeal diseases | Female | 0-6 days  | 1-4 years | Data Rich  | -1        | 1     | Rotavirus coverage (proportion)                        | 0               |
| Diarrhoeal diseases | Female | 0-6 days  | 1-4 years | Data Rich  | -1        | 1     | ORS (oral rehydration)                                 | 550             |
| Diarrhoeal diseases | Female | 0-6 days  | 1-4 years | Data Rich  | -1        | 1     | Sanitation (proportion with access)                    | 553             |
| Diarrhoeal diseases | Female | 0-6 days  | 1-4 years | Data Rich  | 1         | 1     | Short gestation SEV (all ages, by sex)                 | 130             |
| Diarrhoeal diseases | Female | 0-6 days  | 1-4 years | Data Rich  | 1         | 1     | SEV unsafe sanitation                                  | 190             |
| Diarrhoeal diseases | Female | 0-6 days  | 1-4 years | Data Rich  | 1         | 1     | Age- and sex-specific stunting (height-for-age) SEV    | 332             |
| Diarrhoeal diseases | Female | 0-6 days  | 1-4 years | Data Rich  | 1         | 1     | Age- and sex-specific underweight (weight-for-age) SEV | 398             |
| Diarrhoeal diseases | Female | 0-6 days  | 1-4 years | Data Rich  | 1         | 1     | Age- and sex-specific wasting (weight-for-height) SEV  | 424             |
| Diarrhoeal diseases | Female | 0-6 days  | 1-4 years | Data Rich  | 1         | 1     | Low birth weight SEV (all ages, by sex)                | 615             |
| Diarrhoeal diseases | Female | 0-6 days  | 1-4 years | Data Rich  | 1         | 1     | SEV unsafe water                                       | 810             |
| Diarrhoeal diseases | Female | 0-6 days  | 1-4 years | Data Rich  | 1         | 1     | Log-transformed SEV scalar: Diarrhea                   | 910             |
| Diarrhoeal diseases | Female | 0-6 days  | 1-4 years | Data Rich  | -1        | 2     | Healthcare access and quality index                    | 0               |
| Diarrhoeal diseases | Female | 0-6 days  | 1-4 years | Data Rich  | -1        | 2     | Zinc treatment for diarrhea                            | 74              |
| Diarrhoeal diseases | Female | 0-6 days  | 1-4 years | Data Rich  | 1         | 2     | Vitamin A Deficiency Prevalence (age-standardized)     | 13              |
| Diarrhoeal diseases | Female | 0-6 days  | 1-4 years | Data Rich  | 1         | 2     | Discontinued breastfeeding SEV                         | 17              |
| Diarrhoeal diseases | Female | 0-6 days  | 1-4 years | Data Rich  | 1         | 2     | Zinc deficiency                                        | 416             |
| Diarrhoeal diseases | Female | 0-6 days  | 1-4 years | Data Rich  | -1        | 3     | Maternal Education (years per capita)                  | 0               |
| Diarrhoeal diseases | Female | 0-6 days  | 1-4 years | Data Rich  | -1        | 3     | Socio-demographic Index                                | 0               |
| Diarrhoeal diseases | Female | 0-6 days  | 1-4 years | Data Rich  | -1        | 3     | LDI (IS per capita)                                    | --              |
| Diarrhoeal diseases | Female | 0-6 days  | 1-4 years | Data Rich  | 1         | 3     | No access to handwashing facility                      | 661             |
| Diarrhoeal diseases | Female | 0-6 days  | 1-4 years | Global     | -1        | 1     | Improved Water Source (proportion with access)         | 0               |
| Diarrhoeal diseases | Female | 0-6 days  | 1-4 years | Global     | -1        | 1     | Rotavirus coverage (proportion)                        | 12              |
| Diarrhoeal diseases | Female | 0-6 days  | 1-4 years | Global     | -1        | 1     | ORS (oral rehydration)                                 | 541             |
| Diarrhoeal diseases | Female | 0-6 days  | 1-4 years | Global     | -1        | 1     | Sanitation (proportion with access)                    | 708             |
| Diarrhoeal diseases | Female | 0-6 days  | 1-4 years | Global     | 1         | 1     | Age- and sex-specific wasting (weight-for-height) SEV  | 151             |
| Diarrhoeal diseases | Female | 0-6 days  | 1-4 years | Global     | 1         | 1     | Low birth weight SEV (all ages, by sex)                | 154             |
| Diarrhoeal diseases | Female | 0-6 days  | 1-4 years | Global     | 1         | 1     | Short gestation SEV (all ages, by sex)                 | 262             |
| Diarrhoeal diseases | Female | 0-6 days  | 1-4 years | Global     | 1         | 1     | Age- and sex-specific stunting (height-for-age) SEV    | 404             |
| Diarrhoeal diseases | Female | 0-6 days  | 1-4 years | Global     | 1         | 1     | SEV unsafe water                                       | 441             |
| Diarrhoeal diseases | Female | 0-6 days  | 1-4 years | Global     | 1         | 1     | SEV unsafe sanitation                                  | 514             |
| Diarrhoeal diseases | Female | 0-6 days  | 1-4 years | Global     | 1         | 1     | Age- and sex-specific underweight (weight-for-age) SEV | 523             |
| Diarrhoeal diseases | Female | 0-6 days  | 1-4 years | Global     | 1         | 1     | Log-transformed SEV scalar: Diarrhea                   | 553             |
| Diarrhoeal diseases | Female | 0-6 days  | 1-4 years | Global     | -1        | 2     | Healthcare access and quality index                    | 0               |
| Diarrhoeal diseases | Female | 0-6 days  | 1-4 years | Global     | -1        | 2     | Zinc treatment for diarrhea                            | --              |
| Diarrhoeal diseases | Female | 0-6 days  | 1-4 years | Global     | 1         | 2     | Zinc deficiency                                        | 44              |
| Diarrhoeal diseases | Female | 0-6 days  | 1-4 years | Global     | 1         | 2     | Vitamin A Deficiency Prevalence (age-standardized)     | 131             |
| Diarrhoeal diseases | Female | 0-6 days  | 1-4 years | Global     | 1         | 2     | Discontinued breastfeeding SEV                         | 659             |
| Diarrhoeal diseases | Female | 0-6 days  | 1-4 years | Global     | -1        | 3     | Maternal Education (years per capita)                  | 0               |
| Diarrhoeal diseases | Female | 0-6 days  | 1-4 years | Global     | -1        | 3     | Socio-demographic Index                                | 0               |
| Diarrhoeal diseases | Female | 0-6 days  | 1-4 years | Global     | -1        | 3     | LDI (IS per capita)                                    | --              |
| Diarrhoeal diseases | Female | 0-6 days  | 1-4 years | Global     | 1         | 3     | No access to handwashing facility                      | 421             |
| Diarrhoeal diseases | Female | 5-9 years | 95+ years | Data Rich  | -1        | 1     | Improved Water Source (proportion with access)         | 0               |
| Diarrhoeal diseases | Female | 5-9 years | 95+ years | Data Rich  | -1        | 1     | Sanitation (proportion with access)                    | 558             |
| Diarrhoeal diseases | Female | 5-9 years | 95+ years | Data Rich  | 1         | 1     | Log-transformed SEV scalar: Diarrhea                   | 286             |
| Diarrhoeal diseases | Female | 5-9 years | 95+ years | Data Rich  | 1         | 1     | SEV unsafe sanitation                                  | 369             |
| Diarrhoeal diseases | Female | 5-9 years | 95+ years | Data Rich  | 1         | 1     | SEV unsafe water                                       | 525             |
| Diarrhoeal diseases | Female | 5-9 years | 95+ years | Data Rich  | -1        | 2     | Healthcare access and quality index                    | --              |
| Diarrhoeal diseases | Female | 5-9 years | 95+ years | Data Rich  | -1        | 2     | Rotavirus coverage (proportion)                        | --              |
| Diarrhoeal diseases | Female | 5-9 years | 95+ years | Data Rich  | -1        | 3     | Education (years per capita)                           | --              |
| Diarrhoeal diseases | Female | 5-9 years | 95+ years | Data Rich  | -1        | 3     | LDI (IS per capita)                                    | --              |
| Diarrhoeal diseases | Female | 5-9 years | 95+ years | Data Rich  | -1        | 3     | Mean BMI                                               | --              |
| Diarrhoeal diseases | Female | 5-9 years | 95+ years | Data Rich  | -1        | 3     | Socio-demographic Index                                | --              |
| Diarrhoeal diseases | Female | 5-9 years | 95+ years | Data Rich  | 0         | 3     | Population Density (over 1000 ppl/sqkm, proportion)    | 446             |
| Diarrhoeal diseases | Female | 5-9 years | 95+ years | Global     | -1        | 1     | Sanitation (proportion with access)                    | 508             |
| Diarrhoeal diseases | Female | 5-9 years | 95+ years | Global     | -1        | 1     | Improved Water Source (proportion with access)         | --              |
| Diarrhoeal diseases | Female | 5-9 years | 95+ years | Global     | 1         | 1     | Log-transformed SEV scalar: Diarrhea                   | 398             |
| Diarrhoeal diseases | Female | 5-9 years | 95+ years | Global     | 1         | 1     | SEV unsafe sanitation                                  | 455             |
| Diarrhoeal diseases | Female | 5-9 years | 95+ years | Global     | 1         | 1     | SEV unsafe water                                       | 602             |
| Diarrhoeal diseases | Female | 5-9 years | 95+ years | Global     | -1        | 2     | Healthcare access and quality index                    | --              |
| Diarrhoeal diseases | Female | 5-9 years | 95+ years | Global     | -1        | 2     | Rotavirus coverage (proportion)                        | --              |
| Diarrhoeal diseases | Female | 5-9 years | 95+ years | Global     | -1        | 3     | Education (years per capita)                           | --              |
| Diarrhoeal diseases | Female | 5-9 years | 95+ years | Global     | -1        | 3     | LDI (IS per capita)                                    | --              |
| Diarrhoeal diseases | Female | 5-9 years | 95+ years | Global     | -1        | 3     | Mean BMI                                               | --              |

**Appendix Table 9: CODEm covariates used, level of covariate, and expected direction of covariate by cause, sex, and age**

*Covariates that CODEm did not select during the covariate selection process have no draw counts listed.*

| Cause               | Sex    | Age Start   | Age End   | Model Type | Direction | Level | Covariate Name                                         | Number of Draws |
|---------------------|--------|-------------|-----------|------------|-----------|-------|--------------------------------------------------------|-----------------|
| Diarrhoeal diseases | Female | 5-9 years   | 95+ years | Global     | -1        | 3     | Socio-demographic Index                                | --              |
| Diarrhoeal diseases | Female | 5-9 years   | 95+ years | Global     | 0         | 3     | Population Density (over 1000 ppl/sqkm, proportion)    | 348             |
| Diarrhoeal diseases | Male   | 0-6 days    | 1-4 years | Data Rich  | -1        | 1     | Improved Water Source (proportion with access)         | 0               |
| Diarrhoeal diseases | Male   | 0-6 days    | 1-4 years | Data Rich  | -1        | 1     | Rotavirus coverage (proportion)                        | 0               |
| Diarrhoeal diseases | Male   | 0-6 days    | 1-4 years | Data Rich  | -1        | 1     | ORS (oral rehydration)                                 | 301             |
| Diarrhoeal diseases | Male   | 0-6 days    | 1-4 years | Data Rich  | -1        | 1     | Sanitation (proportion with access)                    | 558             |
| Diarrhoeal diseases | Male   | 0-6 days    | 1-4 years | Data Rich  | 1         | 1     | Short gestation SEV (all ages, by sex)                 | 0               |
| Diarrhoeal diseases | Male   | 0-6 days    | 1-4 years | Data Rich  | 1         | 1     | Low birth weight SEV (all ages, by sex)                | 1               |
| Diarrhoeal diseases | Male   | 0-6 days    | 1-4 years | Data Rich  | 1         | 1     | Age- and sex-specific wasting (weight-for-height) SEV  | 222             |
| Diarrhoeal diseases | Male   | 0-6 days    | 1-4 years | Data Rich  | 1         | 1     | SEV unsafe sanitation                                  | 260             |
| Diarrhoeal diseases | Male   | 0-6 days    | 1-4 years | Data Rich  | 1         | 1     | Age- and sex-specific stunting (height-for-age) SEV    | 287             |
| Diarrhoeal diseases | Male   | 0-6 days    | 1-4 years | Data Rich  | 1         | 1     | Log-transformed SEV scalar: Diarrhea                   | 349             |
| Diarrhoeal diseases | Male   | 0-6 days    | 1-4 years | Data Rich  | 1         | 1     | Age- and sex-specific underweight (weight-for-age) SEV | 671             |
| Diarrhoeal diseases | Male   | 0-6 days    | 1-4 years | Data Rich  | 1         | 1     | SEV unsafe water                                       | 878             |
| Diarrhoeal diseases | Male   | 0-6 days    | 1-4 years | Data Rich  | -1        | 2     | Healthcare access and quality index                    | 0               |
| Diarrhoeal diseases | Male   | 0-6 days    | 1-4 years | Data Rich  | -1        | 2     | Zinc treatment for diarrhea                            | 35              |
| Diarrhoeal diseases | Male   | 0-6 days    | 1-4 years | Data Rich  | 1         | 2     | Zinc deficiency                                        | 34              |
| Diarrhoeal diseases | Male   | 0-6 days    | 1-4 years | Data Rich  | 1         | 2     | Vitamin A Deficiency Prevalence (age-standardized)     | 67              |
| Diarrhoeal diseases | Male   | 0-6 days    | 1-4 years | Data Rich  | 1         | 2     | Discontinued breastfeeding SEV                         | 76              |
| Diarrhoeal diseases | Male   | 0-6 days    | 1-4 years | Data Rich  | -1        | 3     | Maternal Education (years per capita)                  | 0               |
| Diarrhoeal diseases | Male   | 0-6 days    | 1-4 years | Data Rich  | -1        | 3     | Socio-demographic Index                                | 0               |
| Diarrhoeal diseases | Male   | 0-6 days    | 1-4 years | Data Rich  | -1        | 3     | LDI (I\$ per capita)                                   | --              |
| Diarrhoeal diseases | Male   | 0-6 days    | 1-4 years | Data Rich  | 1         | 3     | No access to handwashing facility                      | 378             |
| Diarrhoeal diseases | Male   | 0-6 days    | 1-4 years | Global     | -1        | 1     | Improved Water Source (proportion with access)         | 0               |
| Diarrhoeal diseases | Male   | 0-6 days    | 1-4 years | Global     | -1        | 1     | Rotavirus coverage (proportion)                        | 56              |
| Diarrhoeal diseases | Male   | 0-6 days    | 1-4 years | Global     | -1        | 1     | ORS (oral rehydration)                                 | 562             |
| Diarrhoeal diseases | Male   | 0-6 days    | 1-4 years | Global     | -1        | 1     | Sanitation (proportion with access)                    | 841             |
| Diarrhoeal diseases | Male   | 0-6 days    | 1-4 years | Global     | 1         | 1     | Age- and sex-specific wasting (weight-for-height) SEV  | 35              |
| Diarrhoeal diseases | Male   | 0-6 days    | 1-4 years | Global     | 1         | 1     | SEV unsafe sanitation                                  | 153             |
| Diarrhoeal diseases | Male   | 0-6 days    | 1-4 years | Global     | 1         | 1     | Short gestation SEV (all ages, by sex)                 | 207             |
| Diarrhoeal diseases | Male   | 0-6 days    | 1-4 years | Global     | 1         | 1     | Age- and sex-specific underweight (weight-for-age) SEV | 276             |
| Diarrhoeal diseases | Male   | 0-6 days    | 1-4 years | Global     | 1         | 1     | Low birth weight SEV (all ages, by sex)                | 425             |
| Diarrhoeal diseases | Male   | 0-6 days    | 1-4 years | Global     | 1         | 1     | Log-transformed SEV scalar: Diarrhea                   | 648             |
| Diarrhoeal diseases | Male   | 0-6 days    | 1-4 years | Global     | 1         | 1     | SEV unsafe water                                       | 776             |
| Diarrhoeal diseases | Male   | 0-6 days    | 1-4 years | Global     | 1         | 1     | Age- and sex-specific stunting (height-for-age) SEV    | 854             |
| Diarrhoeal diseases | Male   | 0-6 days    | 1-4 years | Global     | -1        | 2     | Healthcare access and quality index                    | 33              |
| Diarrhoeal diseases | Male   | 0-6 days    | 1-4 years | Global     | -1        | 2     | Zinc treatment for diarrhea                            | --              |
| Diarrhoeal diseases | Male   | 0-6 days    | 1-4 years | Global     | 1         | 2     | Zinc deficiency                                        | 1               |
| Diarrhoeal diseases | Male   | 0-6 days    | 1-4 years | Global     | 1         | 2     | Vitamin A Deficiency Prevalence (age-standardized)     | 123             |
| Diarrhoeal diseases | Male   | 0-6 days    | 1-4 years | Global     | 1         | 2     | Discontinued breastfeeding SEV                         | 363             |
| Diarrhoeal diseases | Male   | 0-6 days    | 1-4 years | Global     | -1        | 3     | Maternal Education (years per capita)                  | 77              |
| Diarrhoeal diseases | Male   | 0-6 days    | 1-4 years | Global     | -1        | 3     | Socio-demographic Index                                | 92              |
| Diarrhoeal diseases | Male   | 0-6 days    | 1-4 years | Global     | -1        | 3     | LDI (I\$ per capita)                                   | --              |
| Diarrhoeal diseases | Male   | 0-6 days    | 1-4 years | Global     | 1         | 3     | No access to handwashing facility                      | 149             |
| Diarrhoeal diseases | Male   | 5-9 years   | 95+ years | Data Rich  | -1        | 1     | Sanitation (proportion with access)                    | 395             |
| Diarrhoeal diseases | Male   | 5-9 years   | 95+ years | Data Rich  | -1        | 1     | Improved Water Source (proportion with access)         | --              |
| Diarrhoeal diseases | Male   | 5-9 years   | 95+ years | Data Rich  | 1         | 1     | SEV unsafe water                                       | 142             |
| Diarrhoeal diseases | Male   | 5-9 years   | 95+ years | Data Rich  | 1         | 1     | SEV unsafe sanitation                                  | 562             |
| Diarrhoeal diseases | Male   | 5-9 years   | 95+ years | Data Rich  | 1         | 1     | Log-transformed SEV scalar: Diarrhea                   | 778             |
| Diarrhoeal diseases | Male   | 5-9 years   | 95+ years | Data Rich  | -1        | 2     | Healthcare access and quality index                    | --              |
| Diarrhoeal diseases | Male   | 5-9 years   | 95+ years | Data Rich  | -1        | 2     | Rotavirus coverage (proportion)                        | --              |
| Diarrhoeal diseases | Male   | 5-9 years   | 95+ years | Data Rich  | -1        | 3     | Education (years per capita)                           | --              |
| Diarrhoeal diseases | Male   | 5-9 years   | 95+ years | Data Rich  | -1        | 3     | LDI (I\$ per capita)                                   | --              |
| Diarrhoeal diseases | Male   | 5-9 years   | 95+ years | Data Rich  | -1        | 3     | Mean BMI                                               | --              |
| Diarrhoeal diseases | Male   | 5-9 years   | 95+ years | Data Rich  | -1        | 3     | Socio-demographic Index                                | --              |
| Diarrhoeal diseases | Male   | 5-9 years   | 95+ years | Data Rich  | 0         | 3     | Population Density (over 1000 ppl/sqkm, proportion)    | 443             |
| Diarrhoeal diseases | Male   | 5-9 years   | 95+ years | Global     | -1        | 1     | Improved Water Source (proportion with access)         | 0               |
| Diarrhoeal diseases | Male   | 5-9 years   | 95+ years | Global     | -1        | 1     | Sanitation (proportion with access)                    | 466             |
| Diarrhoeal diseases | Male   | 5-9 years   | 95+ years | Global     | 1         | 1     | Log-transformed SEV scalar: Diarrhea                   | 368             |
| Diarrhoeal diseases | Male   | 5-9 years   | 95+ years | Global     | 1         | 1     | SEV unsafe water                                       | 544             |
| Diarrhoeal diseases | Male   | 5-9 years   | 95+ years | Global     | 1         | 1     | SEV unsafe sanitation                                  | 564             |
| Diarrhoeal diseases | Male   | 5-9 years   | 95+ years | Global     | -1        | 2     | Healthcare access and quality index                    | 0               |
| Diarrhoeal diseases | Male   | 5-9 years   | 95+ years | Global     | -1        | 2     | Rotavirus coverage (proportion)                        | --              |
| Diarrhoeal diseases | Male   | 5-9 years   | 95+ years | Global     | -1        | 3     | Education (years per capita)                           | --              |
| Diarrhoeal diseases | Male   | 5-9 years   | 95+ years | Global     | -1        | 3     | LDI (I\$ per capita)                                   | --              |
| Diarrhoeal diseases | Male   | 5-9 years   | 95+ years | Global     | -1        | 3     | Mean BMI                                               | --              |
| Diarrhoeal diseases | Male   | 5-9 years   | 95+ years | Global     | -1        | 3     | Socio-demographic Index                                | --              |
| Diarrhoeal diseases | Male   | 5-9 years   | 95+ years | Global     | 0         | 3     | Population Density (over 1000 ppl/sqkm, proportion)    | 471             |
| Dengue              | Female | 28-364 days | 95+ years | Data Rich  | 1         | 1     | Population weighted probability of dengue transmission | 720             |
| Dengue              | Female | 28-364 days | 95+ years | Data Rich  | 1         | 1     | Population Density (over 1000 ppl/sqkm, proportion)    | --              |
| Dengue              | Female | 28-364 days | 95+ years | Data Rich  | 0         | 2     | Health System Access (unitless)                        | 740             |
| Dengue              | Female | 28-364 days | 95+ years | Data Rich  | 1         | 2     | Elevation Under 100m (proportion)                      | 259             |
| Dengue              | Female | 28-364 days | 95+ years | Data Rich  | 1         | 2     | Latitude Under 15 (proportion)                         | 528             |
| Dengue              | Female | 28-364 days | 95+ years | Data Rich  | 1         | 2     | Dengue outbreaks (binary)                              | 787             |
| Dengue              | Female | 28-364 days | 95+ years | Data Rich  | 1         | 2     | Rainfall Quintile 4 (proportion)                       | --              |
| Dengue              | Female | 28-364 days | 95+ years | Data Rich  | 1         | 2     | Rainfall Quintile 5 (proportion)                       | --              |
| Dengue              | Female | 28-364 days | 95+ years | Data Rich  | 0         | 3     | Education (years per capita)                           | 299             |
| Dengue              | Female | 28-364 days | 95+ years | Data Rich  | 0         | 3     | LDI (I\$ per capita)                                   | --              |



**Appendix Table 9: CODEm covariates used, level of covariate, and expected direction of covariate by cause, sex, and age**

*Covariates that CODEm did not select during the covariate selection process have no draw counts listed.*

| Cause                             | Sex    | Age Start   | Age End   | Model Type | Direction | Level | Covariate Name                                         | Number of Draws |
|-----------------------------------|--------|-------------|-----------|------------|-----------|-------|--------------------------------------------------------|-----------------|
| Dengue                            | Female | 28-364 days | 95+ years | Global     | 1         | 1     | Population weighted probability of dengue transmission | 1000            |
| Dengue                            | Female | 28-364 days | 95+ years | Global     | 1         | 1     | Population Density (over 1000 ppl/sqkm, proportion)    | --              |
| Dengue                            | Female | 28-364 days | 95+ years | Global     | 0         | 2     | Health System Access (unitless)                        | 647             |
| Dengue                            | Female | 28-364 days | 95+ years | Global     | 1         | 2     | Elevation Under 100m (proportion)                      | 129             |
| Dengue                            | Female | 28-364 days | 95+ years | Global     | 1         | 2     | Dengue outbreaks (binary)                              | 725             |
| Dengue                            | Female | 28-364 days | 95+ years | Global     | 1         | 2     | Latitude Under 15 (proportion)                         | 725             |
| Dengue                            | Female | 28-364 days | 95+ years | Global     | 1         | 2     | Rainfall Quintile 4 (proportion)                       | --              |
| Dengue                            | Female | 28-364 days | 95+ years | Global     | 1         | 2     | Rainfall Quintile 5 (proportion)                       | --              |
| Dengue                            | Female | 28-364 days | 95+ years | Global     | 0         | 3     | Education (years per capita)                           | --              |
| Dengue                            | Female | 28-364 days | 95+ years | Global     | 0         | 3     | LDI (1\$ per capita)                                   | --              |
| Dengue                            | Male   | 28-364 days | 95+ years | Data Rich  | 1         | 1     | Population weighted probability of dengue transmission | 668             |
| Dengue                            | Male   | 28-364 days | 95+ years | Data Rich  | 1         | 1     | Population Density (over 1000 ppl/sqkm, proportion)    | --              |
| Dengue                            | Male   | 28-364 days | 95+ years | Data Rich  | 0         | 2     | Health System Access (unitless)                        | 672             |
| Dengue                            | Male   | 28-364 days | 95+ years | Data Rich  | 1         | 2     | Elevation Under 100m (proportion)                      | 244             |
| Dengue                            | Male   | 28-364 days | 95+ years | Data Rich  | 1         | 2     | Rainfall Quintile 4 (proportion)                       | 244             |
| Dengue                            | Male   | 28-364 days | 95+ years | Data Rich  | 1         | 2     | Dengue outbreaks (binary)                              | 428             |
| Dengue                            | Male   | 28-364 days | 95+ years | Data Rich  | 1         | 2     | Latitude Under 15 (proportion)                         | 672             |
| Dengue                            | Male   | 28-364 days | 95+ years | Data Rich  | 1         | 2     | Rainfall Quintile 4 (proportion)                       | --              |
| Dengue                            | Male   | 28-364 days | 95+ years | Data Rich  | 0         | 3     | Education (years per capita)                           | 600             |
| Dengue                            | Male   | 28-364 days | 95+ years | Data Rich  | 0         | 3     | LDI (1\$ per capita)                                   | --              |
| Dengue                            | Male   | 28-364 days | 95+ years | Global     | 1         | 1     | Population Density (over 1000 ppl/sqkm, proportion)    | 101             |
| Dengue                            | Male   | 28-364 days | 95+ years | Global     | 1         | 1     | Population weighted probability of dengue transmission | 899             |
| Dengue                            | Male   | 28-364 days | 95+ years | Global     | 0         | 2     | Health System Access (unitless)                        | 483             |
| Dengue                            | Male   | 28-364 days | 95+ years | Global     | 1         | 2     | Elevation Under 100m (proportion)                      | 87              |
| Dengue                            | Male   | 28-364 days | 95+ years | Global     | 1         | 2     | Rainfall Quintile 4 (proportion)                       | 570             |
| Dengue                            | Male   | 28-364 days | 95+ years | Global     | 1         | 2     | Dengue outbreaks (binary)                              | 594             |
| Dengue                            | Male   | 28-364 days | 95+ years | Global     | 1         | 2     | Latitude Under 15 (proportion)                         | 612             |
| Dengue                            | Male   | 28-364 days | 95+ years | Global     | 1         | 2     | Rainfall Quintile 5 (proportion)                       | --              |
| Dengue                            | Male   | 28-364 days | 95+ years | Global     | 0         | 3     | Education (years per capita)                           | 381             |
| Dengue                            | Male   | 28-364 days | 95+ years | Global     | 0         | 3     | LDI (1\$ per capita)                                   | --              |
| Rabies                            | Female | 28-364 days | 95+ years | Data Rich  | -1        | 1     | Antenatal Care (4 visits) Coverage (proportion)        | 206             |
| Rabies                            | Female | 28-364 days | 95+ years | Data Rich  | -1        | 1     | In-Facility Delivery (proportion)                      | 384             |
| Rabies                            | Female | 28-364 days | 95+ years | Data Rich  | -1        | 1     | Health System Access (unitless)                        | 700             |
| Rabies                            | Female | 28-364 days | 95+ years | Data Rich  | -1        | 2     | Health System Access (capped)                          | 1               |
| Rabies                            | Female | 28-364 days | 95+ years | Data Rich  | -1        | 2     | Healthcare access and quality index                    | 82              |
| Rabies                            | Female | 28-364 days | 95+ years | Data Rich  | -1        | 2     | Skilled Birth Attendance (proportion)                  | 952             |
| Rabies                            | Female | 28-364 days | 95+ years | Data Rich  | -1        | 3     | Socio-demographic Index                                | 44              |
| Rabies                            | Female | 28-364 days | 95+ years | Data Rich  | 0         | 3     | Population Density (500-1000 ppl/sqkm, proportion)     | --              |
| Rabies                            | Female | 28-364 days | 95+ years | Data Rich  | 0         | 3     | Population Density (under 150 ppl/sqkm, proportion)    | --              |
| Rabies                            | Female | 28-364 days | 95+ years | Global     | -1        | 1     | Antenatal Care (4 visits) Coverage (proportion)        | 352             |
| Rabies                            | Female | 28-364 days | 95+ years | Global     | -1        | 1     | In-Facility Delivery (proportion)                      | 919             |
| Rabies                            | Female | 28-364 days | 95+ years | Global     | -1        | 2     | Skilled Birth Attendance (proportion)                  | 246             |
| Rabies                            | Female | 28-364 days | 95+ years | Global     | -1        | 2     | Health System Access (unitless)                        | 342             |
| Rabies                            | Female | 28-364 days | 95+ years | Global     | 1         | 2     | Healthcare access and quality index                    | --              |
| Rabies                            | Female | 28-364 days | 95+ years | Global     | -1        | 3     | Socio-demographic Index                                | 329             |
| Rabies                            | Female | 28-364 days | 95+ years | Global     | 0         | 3     | Population Density (500-1000 ppl/sqkm, proportion)     | --              |
| Rabies                            | Female | 28-364 days | 95+ years | Global     | 0         | 3     | Population Density (under 150 ppl/sqkm, proportion)    | --              |
| Rabies                            | Male   | 28-364 days | 95+ years | Data Rich  | -1        | 1     | Health System Access (unitless)                        | 288             |
| Rabies                            | Male   | 28-364 days | 95+ years | Data Rich  | -1        | 1     | Antenatal Care (4 visits) Coverage (proportion)        | 444             |
| Rabies                            | Male   | 28-364 days | 95+ years | Data Rich  | -1        | 1     | In-Facility Delivery (proportion)                      | 793             |
| Rabies                            | Male   | 28-364 days | 95+ years | Data Rich  | -1        | 2     | Health System Access (capped)                          | 25              |
| Rabies                            | Male   | 28-364 days | 95+ years | Data Rich  | -1        | 2     | Healthcare access and quality index                    | 353             |
| Rabies                            | Male   | 28-364 days | 95+ years | Data Rich  | -1        | 2     | Skilled Birth Attendance (proportion)                  | 959             |
| Rabies                            | Male   | 28-364 days | 95+ years | Data Rich  | -1        | 3     | Socio-demographic Index                                | 57              |
| Rabies                            | Male   | 28-364 days | 95+ years | Data Rich  | 0         | 3     | Population Density (500-1000 ppl/sqkm, proportion)     | --              |
| Rabies                            | Male   | 28-364 days | 95+ years | Data Rich  | 0         | 3     | Population Density (under 150 ppl/sqkm, proportion)    | --              |
| Rabies                            | Male   | 28-364 days | 95+ years | Global     | -1        | 1     | In-Facility Delivery (proportion)                      | 697             |
| Rabies                            | Male   | 28-364 days | 95+ years | Global     | -1        | 1     | Antenatal Care (4 visits) Coverage (proportion)        | 747             |
| Rabies                            | Male   | 28-364 days | 95+ years | Global     | -1        | 2     | Skilled Birth Attendance (proportion)                  | 38              |
| Rabies                            | Male   | 28-364 days | 95+ years | Global     | -1        | 2     | Health System Access (unitless)                        | 130             |
| Rabies                            | Male   | 28-364 days | 95+ years | Global     | 1         | 2     | Healthcare access and quality index                    | 231             |
| Rabies                            | Male   | 28-364 days | 95+ years | Global     | -1        | 3     | Socio-demographic Index                                | 735             |
| Rabies                            | Male   | 28-364 days | 95+ years | Global     | 0         | 3     | Population Density (500-1000 ppl/sqkm, proportion)     | --              |
| Rabies                            | Male   | 28-364 days | 95+ years | Global     | 0         | 3     | Population Density (under 150 ppl/sqkm, proportion)    | --              |
| Other neglected tropical diseases | Female | 0-6 days    | 95+ years | Data Rich  | -1        | 1     | Healthcare access and quality index                    | 521             |
| Other neglected tropical diseases | Female | 0-6 days    | 95+ years | Data Rich  | 1         | 1     | Latitude Under 15 (proportion)                         | 728             |
| Other neglected tropical diseases | Female | 0-6 days    | 95+ years | Data Rich  | -1        | 2     | Sanitation (proportion with access)                    | 155             |
| Other neglected tropical diseases | Female | 0-6 days    | 95+ years | Data Rich  | 1         | 2     | Rainfall Quintile 5 (proportion)                       | 377             |
| Other neglected tropical diseases | Female | 0-6 days    | 95+ years | Data Rich  | -1        | 3     | Socio-demographic Index                                | 173             |
| Other neglected tropical diseases | Female | 0-6 days    | 95+ years | Data Rich  | -1        | 3     | Education (years per capita)                           | --              |
| Other neglected tropical diseases | Female | 0-6 days    | 95+ years | Data Rich  | -1        | 3     | LDI (1\$ per capita)                                   | --              |
| Other neglected tropical diseases | Female | 0-6 days    | 95+ years | Global     | -1        | 1     | Healthcare access and quality index                    | 674             |
| Other neglected tropical diseases | Female | 0-6 days    | 95+ years | Global     | 1         | 1     | Latitude Under 15 (proportion)                         | 252             |
| Other neglected tropical diseases | Female | 0-6 days    | 95+ years | Global     | -1        | 2     | Sanitation (proportion with access)                    | 237             |
| Other neglected tropical diseases | Female | 0-6 days    | 95+ years | Global     | 1         | 2     | Rainfall Quintile 5 (proportion)                       | 563             |
| Other neglected tropical diseases | Female | 0-6 days    | 95+ years | Global     | -1        | 3     | Education (years per capita)                           | --              |
| Other neglected tropical diseases | Female | 0-6 days    | 95+ years | Global     | -1        | 3     | LDI (1\$ per capita)                                   | --              |
| Other neglected tropical diseases | Female | 0-6 days    | 95+ years | Global     | -1        | 3     | Socio-demographic Index                                | --              |

**Appendix Table 9: CODEm covariates used, level of covariate, and expected direction of covariate by cause, sex, and age**

*Covariates that CODEm did not select during the covariate selection process have no draw counts listed.*

| Cause                             | Sex    | Age Start | Age End   | Model Type | Direction | Level | Covariate Name                                                                                             | Number of Draws |
|-----------------------------------|--------|-----------|-----------|------------|-----------|-------|------------------------------------------------------------------------------------------------------------|-----------------|
| Other neglected tropical diseases | Male   | 0-6 days  | 95+ years | Data Rich  | -1        | 1     | Healthcare access and quality index                                                                        | 487             |
| Other neglected tropical diseases | Male   | 0-6 days  | 95+ years | Data Rich  | 1         | 1     | Latitude Under 15 (proportion)                                                                             | 646             |
| Other neglected tropical diseases | Male   | 0-6 days  | 95+ years | Data Rich  | -1        | 2     | Sanitation (proportion with access)                                                                        | 475             |
| Other neglected tropical diseases | Male   | 0-6 days  | 95+ years | Data Rich  | 1         | 2     | Rainfall Quintile 5 (proportion)                                                                           | 475             |
| Other neglected tropical diseases | Male   | 0-6 days  | 95+ years | Data Rich  | -1        | 3     | Education (years per capita)                                                                               | --              |
| Other neglected tropical diseases | Male   | 0-6 days  | 95+ years | Data Rich  | -1        | 3     | LDI (IS per capita)                                                                                        | --              |
| Other neglected tropical diseases | Male   | 0-6 days  | 95+ years | Data Rich  | -1        | 3     | Socio-demographic Index                                                                                    | --              |
| Other neglected tropical diseases | Male   | 0-6 days  | 95+ years | Global     | -1        | 1     | Healthcare access and quality index                                                                        | 537             |
| Other neglected tropical diseases | Male   | 0-6 days  | 95+ years | Global     | 1         | 1     | Latitude Under 15 (proportion)                                                                             | 629             |
| Other neglected tropical diseases | Male   | 0-6 days  | 95+ years | Global     | -1        | 2     | Sanitation (proportion with access)                                                                        | 406             |
| Other neglected tropical diseases | Male   | 0-6 days  | 95+ years | Global     | 1         | 2     | Rainfall Quintile 5 (proportion)                                                                           | 100             |
| Other neglected tropical diseases | Male   | 0-6 days  | 95+ years | Global     | -1        | 3     | Education (years per capita)                                                                               | --              |
| Other neglected tropical diseases | Male   | 0-6 days  | 95+ years | Global     | -1        | 3     | LDI (IS per capita)                                                                                        | --              |
| Other neglected tropical diseases | Male   | 0-6 days  | 95+ years | Global     | -1        | 3     | Socio-demographic Index                                                                                    | --              |
| Meningitis                        | Female | 0-6 days  | 1-4 years | Data Rich  | -1        | 1     | Hib3 Vaccine Coverage (proportion)                                                                         | 1000            |
| Meningitis                        | Female | 0-6 days  | 1-4 years | Data Rich  | -1        | 1     | Proportion of total population covered by menaftrivac initiative (meningitis meningococcal type A vaccine) | --              |
| Meningitis                        | Female | 0-6 days  | 1-4 years | Data Rich  | 1         | 1     | meningitis belt (proportion)                                                                               | --              |
| Meningitis                        | Female | 0-6 days  | 1-4 years | Data Rich  | -1        | 2     | Health System Access (capped)                                                                              | 125             |
| Meningitis                        | Female | 0-6 days  | 1-4 years | Data Rich  | -1        | 2     | Healthcare access and quality index                                                                        | 233             |
| Meningitis                        | Female | 0-6 days  | 1-4 years | Data Rich  | -1        | 2     | Improved Water Source (proportion with access)                                                             | --              |
| Meningitis                        | Female | 0-6 days  | 1-4 years | Data Rich  | 1         | 2     | Underweight (proportion <2SD weight for age, <5 years)                                                     | 502             |
| Meningitis                        | Female | 0-6 days  | 1-4 years | Data Rich  | -1        | 3     | DTP3 Coverage (proportion)                                                                                 | 65              |
| Meningitis                        | Female | 0-6 days  | 1-4 years | Data Rich  | -1        | 3     | Sanitation (proportion with access)                                                                        | 192             |
| Meningitis                        | Female | 0-6 days  | 1-4 years | Data Rich  | -1        | 3     | Maternal Education (years per capita)                                                                      | 229             |
| Meningitis                        | Female | 0-6 days  | 1-4 years | Data Rich  | -1        | 3     | Socio-demographic Index                                                                                    | 274             |
| Meningitis                        | Female | 0-6 days  | 1-4 years | Data Rich  | -1        | 3     | LDI (IS per capita)                                                                                        | --              |
| Meningitis                        | Female | 0-6 days  | 1-4 years | Global     | -1        | 1     | Proportion of total population covered by menaftrivac initiative (meningitis meningococcal type A vaccine) | 3               |
| Meningitis                        | Female | 0-6 days  | 1-4 years | Global     | -1        | 1     | Hib3 Vaccine Coverage (proportion)                                                                         | 819             |
| Meningitis                        | Female | 0-6 days  | 1-4 years | Global     | 1         | 1     | meningitis belt (proportion)                                                                               | 421             |
| Meningitis                        | Female | 0-6 days  | 1-4 years | Global     | -1        | 2     | Health System Access (capped)                                                                              | 47              |
| Meningitis                        | Female | 0-6 days  | 1-4 years | Global     | -1        | 2     | Healthcare access and quality index                                                                        | 252             |
| Meningitis                        | Female | 0-6 days  | 1-4 years | Global     | -1        | 2     | Improved Water Source (proportion with access)                                                             | --              |
| Meningitis                        | Female | 0-6 days  | 1-4 years | Global     | 1         | 2     | Underweight (proportion <2SD weight for age, <5 years)                                                     | 193             |
| Meningitis                        | Female | 0-6 days  | 1-4 years | Global     | -1        | 3     | Maternal Education (years per capita)                                                                      | 65              |
| Meningitis                        | Female | 0-6 days  | 1-4 years | Global     | -1        | 3     | Socio-demographic Index                                                                                    | 73              |
| Meningitis                        | Female | 0-6 days  | 1-4 years | Global     | -1        | 3     | Sanitation (proportion with access)                                                                        | 254             |
| Meningitis                        | Female | 0-6 days  | 1-4 years | Global     | -1        | 3     | DTP3 Coverage (proportion)                                                                                 | 283             |
| Meningitis                        | Female | 0-6 days  | 1-4 years | Global     | -1        | 3     | LDI (IS per capita)                                                                                        | --              |
| Meningitis                        | Female | 5-9 years | 95+ years | Data Rich  | -1        | 1     | Hib3 Vaccine Coverage (proportion)                                                                         | 1000            |
| Meningitis                        | Female | 5-9 years | 95+ years | Data Rich  | -1        | 1     | Proportion of total population covered by menaftrivac initiative (meningitis meningococcal type A vaccine) | --              |
| Meningitis                        | Female | 5-9 years | 95+ years | Data Rich  | 1         | 1     | meningitis belt (proportion)                                                                               | --              |
| Meningitis                        | Female | 5-9 years | 95+ years | Data Rich  | -1        | 2     | Healthcare access and quality index                                                                        | 40              |
| Meningitis                        | Female | 5-9 years | 95+ years | Data Rich  | -1        | 2     | Health System Access (capped)                                                                              | --              |
| Meningitis                        | Female | 5-9 years | 95+ years | Data Rich  | -1        | 2     | Improved Water Source (proportion with access)                                                             | --              |
| Meningitis                        | Female | 5-9 years | 95+ years | Data Rich  | 1         | 2     | Underweight (proportion <2SD weight for age, <5 years)                                                     | 542             |
| Meningitis                        | Female | 5-9 years | 95+ years | Data Rich  | -1        | 3     | DTP3 Coverage (proportion)                                                                                 | 13              |
| Meningitis                        | Female | 5-9 years | 95+ years | Data Rich  | -1        | 3     | Maternal Education (years per capita)                                                                      | 176             |
| Meningitis                        | Female | 5-9 years | 95+ years | Data Rich  | -1        | 3     | Sanitation (proportion with access)                                                                        | 408             |
| Meningitis                        | Female | 5-9 years | 95+ years | Data Rich  | -1        | 3     | Socio-demographic Index                                                                                    | 414             |
| Meningitis                        | Female | 5-9 years | 95+ years | Data Rich  | -1        | 3     | LDI (IS per capita)                                                                                        | --              |
| Meningitis                        | Female | 5-9 years | 95+ years | Global     | -1        | 1     | Hib3 Vaccine Coverage (proportion)                                                                         | 992             |
| Meningitis                        | Female | 5-9 years | 95+ years | Global     | -1        | 1     | Proportion of total population covered by menaftrivac initiative (meningitis meningococcal type A vaccine) | --              |
| Meningitis                        | Female | 5-9 years | 95+ years | Global     | 1         | 1     | meningitis belt (proportion)                                                                               | 8               |
| Meningitis                        | Female | 5-9 years | 95+ years | Global     | -1        | 2     | Healthcare access and quality index                                                                        | 90              |
| Meningitis                        | Female | 5-9 years | 95+ years | Global     | -1        | 2     | Health System Access (capped)                                                                              | --              |
| Meningitis                        | Female | 5-9 years | 95+ years | Global     | -1        | 2     | Improved Water Source (proportion with access)                                                             | --              |
| Meningitis                        | Female | 5-9 years | 95+ years | Global     | 1         | 2     | Underweight (proportion <2SD weight for age, <5 years)                                                     | 525             |
| Meningitis                        | Female | 5-9 years | 95+ years | Global     | -1        | 3     | DTP3 Coverage (proportion)                                                                                 | 26              |
| Meningitis                        | Female | 5-9 years | 95+ years | Global     | -1        | 3     | Maternal Education (years per capita)                                                                      | 70              |
| Meningitis                        | Female | 5-9 years | 95+ years | Global     | -1        | 3     | Socio-demographic Index                                                                                    | 302             |
| Meningitis                        | Female | 5-9 years | 95+ years | Global     | -1        | 3     | Sanitation (proportion with access)                                                                        | 507             |
| Meningitis                        | Female | 5-9 years | 95+ years | Global     | -1        | 3     | LDI (IS per capita)                                                                                        | --              |
| Meningitis                        | Male   | 0-6 days  | 1-4 years | Data Rich  | -1        | 1     | Hib3 Vaccine Coverage (proportion)                                                                         | 1000            |
| Meningitis                        | Male   | 0-6 days  | 1-4 years | Data Rich  | -1        | 1     | Proportion of total population covered by menaftrivac initiative (meningitis meningococcal type A vaccine) | --              |
| Meningitis                        | Male   | 0-6 days  | 1-4 years | Data Rich  | 1         | 1     | meningitis belt (proportion)                                                                               | --              |
| Meningitis                        | Male   | 0-6 days  | 1-4 years | Data Rich  | -1        | 2     | Healthcare access and quality index                                                                        | 305             |
| Meningitis                        | Male   | 0-6 days  | 1-4 years | Data Rich  | -1        | 2     | Health System Access (capped)                                                                              | 333             |
| Meningitis                        | Male   | 0-6 days  | 1-4 years | Data Rich  | -1        | 2     | Improved Water Source (proportion with access)                                                             | --              |
| Meningitis                        | Male   | 0-6 days  | 1-4 years | Data Rich  | 1         | 2     | Underweight (proportion <2SD weight for age, <5 years)                                                     | 531             |
| Meningitis                        | Male   | 0-6 days  | 1-4 years | Data Rich  | -1        | 3     | DTP3 Coverage (proportion)                                                                                 | 108             |
| Meningitis                        | Male   | 0-6 days  | 1-4 years | Data Rich  | -1        | 3     | Sanitation (proportion with access)                                                                        | 279             |
| Meningitis                        | Male   | 0-6 days  | 1-4 years | Data Rich  | -1        | 3     | Maternal Education (years per capita)                                                                      | 306             |
| Meningitis                        | Male   | 0-6 days  | 1-4 years | Data Rich  | -1        | 3     | Socio-demographic Index                                                                                    | 375             |
| Meningitis                        | Male   | 0-6 days  | 1-4 years | Data Rich  | -1        | 3     | LDI (IS per capita)                                                                                        | --              |
| Meningitis                        | Male   | 0-6 days  | 1-4 years | Global     | -1        | 1     | Hib3 Vaccine Coverage (proportion)                                                                         | 635             |

**Appendix Table 9: CODEm covariates used, level of covariate, and expected direction of covariate by cause, sex, and age**

*Covariates that CODEm did not select during the covariate selection process have no draw counts listed.*

| Cause        | Sex    | Age Start | Age End   | Model Type | Direction | Level | Covariate Name                                                                                            | Number of Draws |
|--------------|--------|-----------|-----------|------------|-----------|-------|-----------------------------------------------------------------------------------------------------------|-----------------|
| Meningitis   | Male   | 0-6 days  | 1-4 years | Global     | -1        | 1     | Proportion of total population covered by menafrivac initiative (meningitis meningococcal type A vaccine) | --              |
| Meningitis   | Male   | 0-6 days  | 1-4 years | Global     | 1         | 1     | meningitis belt (proportion)                                                                              | 606             |
| Meningitis   | Male   | 0-6 days  | 1-4 years | Global     | -1        | 2     | Health System Access (capped)                                                                             | 225             |
| Meningitis   | Male   | 0-6 days  | 1-4 years | Global     | -1        | 2     | Healthcare access and quality index                                                                       | 372             |
| Meningitis   | Male   | 0-6 days  | 1-4 years | Global     | -1        | 2     | Improved Water Source (proportion with access)                                                            | --              |
| Meningitis   | Male   | 0-6 days  | 1-4 years | Global     | 1         | 2     | Underweight (proportion <2SD weight for age, <5 years)                                                    | 145             |
| Meningitis   | Male   | 0-6 days  | 1-4 years | Global     | -1        | 3     | DTP3 Coverage (proportion)                                                                                | 80              |
| Meningitis   | Male   | 0-6 days  | 1-4 years | Global     | -1        | 3     | Maternal Education (years per capita)                                                                     | 113             |
| Meningitis   | Male   | 0-6 days  | 1-4 years | Global     | -1        | 3     | Socio-demographic Index                                                                                   | 126             |
| Meningitis   | Male   | 0-6 days  | 1-4 years | Global     | -1        | 3     | Sanitation (proportion with access)                                                                       | 525             |
| Meningitis   | Male   | 0-6 days  | 1-4 years | Global     | -1        | 3     | LDI (I\$ per capita)                                                                                      | --              |
| Meningitis   | Male   | 5-9 years | 95+ years | Data Rich  | -1        | 1     | Hib3 Vaccine Coverage (proportion)                                                                        | 1000            |
| Meningitis   | Male   | 5-9 years | 95+ years | Data Rich  | -1        | 1     | Proportion of total population covered by menafrivac initiative (meningitis meningococcal type A vaccine) | --              |
| Meningitis   | Male   | 5-9 years | 95+ years | Data Rich  | 1         | 1     | meningitis belt (proportion)                                                                              | --              |
| Meningitis   | Male   | 5-9 years | 95+ years | Data Rich  | -1        | 2     | Healthcare access and quality index                                                                       | 73              |
| Meningitis   | Male   | 5-9 years | 95+ years | Data Rich  | -1        | 2     | Health System Access (capped)                                                                             | --              |
| Meningitis   | Male   | 5-9 years | 95+ years | Data Rich  | -1        | 2     | Improved Water Source (proportion with access)                                                            | --              |
| Meningitis   | Male   | 5-9 years | 95+ years | Data Rich  | 1         | 2     | Underweight (proportion <2SD weight for age, <5 years)                                                    | 153             |
| Meningitis   | Male   | 5-9 years | 95+ years | Data Rich  | -1        | 3     | Maternal Education (years per capita)                                                                     | 202             |
| Meningitis   | Male   | 5-9 years | 95+ years | Data Rich  | -1        | 3     | Socio-demographic Index                                                                                   | 241             |
| Meningitis   | Male   | 5-9 years | 95+ years | Data Rich  | -1        | 3     | Sanitation (proportion with access)                                                                       | 358             |
| Meningitis   | Male   | 5-9 years | 95+ years | Data Rich  | -1        | 3     | DTP3 Coverage (proportion)                                                                                | --              |
| Meningitis   | Male   | 5-9 years | 95+ years | Data Rich  | -1        | 3     | LDI (I\$ per capita)                                                                                      | --              |
| Meningitis   | Male   | 5-9 years | 95+ years | Global     | -1        | 1     | Hib3 Vaccine Coverage (proportion)                                                                        | --              |
| Meningitis   | Male   | 5-9 years | 95+ years | Global     | -1        | 1     | Proportion of total population covered by menafrivac initiative (meningitis meningococcal type A vaccine) | --              |
| Meningitis   | Male   | 5-9 years | 95+ years | Global     | 1         | 1     | meningitis belt (proportion)                                                                              | 24              |
| Meningitis   | Male   | 5-9 years | 95+ years | Global     | -1        | 2     | Healthcare access and quality index                                                                       | 420             |
| Meningitis   | Male   | 5-9 years | 95+ years | Global     | -1        | 2     | Health System Access (capped)                                                                             | --              |
| Meningitis   | Male   | 5-9 years | 95+ years | Global     | -1        | 2     | Improved Water Source (proportion with access)                                                            | --              |
| Meningitis   | Male   | 5-9 years | 95+ years | Global     | 1         | 2     | Underweight (proportion <2SD weight for age, <5 years)                                                    | 325             |
| Meningitis   | Male   | 5-9 years | 95+ years | Global     | -1        | 3     | DTP3 Coverage (proportion)                                                                                | 182             |
| Meningitis   | Male   | 5-9 years | 95+ years | Global     | -1        | 3     | Socio-demographic Index                                                                                   | 285             |
| Meningitis   | Male   | 5-9 years | 95+ years | Global     | -1        | 3     | Sanitation (proportion with access)                                                                       | 381             |
| Meningitis   | Male   | 5-9 years | 95+ years | Global     | -1        | 3     | LDI (I\$ per capita)                                                                                      | --              |
| Meningitis   | Male   | 5-9 years | 95+ years | Global     | -1        | 3     | Maternal Education (years per capita)                                                                     | --              |
| Encephalitis | Female | 0-6 days  | 95+ years | Data Rich  | 1         | 1     | Japanese encephalitis endemic area (binary)                                                               | 611             |
| Encephalitis | Female | 0-6 days  | 95+ years | Data Rich  | 1         | 1     | Underweight (proportion <2SD weight for age, <5 years)                                                    | 698             |
| Encephalitis | Female | 0-6 days  | 95+ years | Data Rich  | -1        | 2     | Health System Access (capped)                                                                             | --              |
| Encephalitis | Female | 0-6 days  | 95+ years | Data Rich  | -1        | 2     | Healthcare access and quality index                                                                       | --              |
| Encephalitis | Female | 0-6 days  | 95+ years | Data Rich  | -1        | 2     | LDI (I\$ per capita)                                                                                      | --              |
| Encephalitis | Female | 0-6 days  | 95+ years | Data Rich  | -1        | 3     | Improved Water Source (proportion with access)                                                            | 69              |
| Encephalitis | Female | 0-6 days  | 95+ years | Data Rich  | -1        | 3     | Sanitation (proportion with access)                                                                       | 658             |
| Encephalitis | Female | 0-6 days  | 95+ years | Data Rich  | -1        | 3     | DTP3 Coverage (proportion)                                                                                | --              |
| Encephalitis | Female | 0-6 days  | 95+ years | Data Rich  | -1        | 3     | In-Facility Delivery (proportion)                                                                         | --              |
| Encephalitis | Female | 0-6 days  | 95+ years | Data Rich  | -1        | 3     | Maternal Education (years per capita)                                                                     | --              |
| Encephalitis | Female | 0-6 days  | 95+ years | Data Rich  | -1        | 3     | Socio-demographic Index                                                                                   | --              |
| Encephalitis | Female | 0-6 days  | 95+ years | Global     | 1         | 1     | Japanese encephalitis endemic area (binary)                                                               | 800             |
| Encephalitis | Female | 0-6 days  | 95+ years | Global     | 1         | 1     | Underweight (proportion <2SD weight for age, <5 years)                                                    | --              |
| Encephalitis | Female | 0-6 days  | 95+ years | Global     | -1        | 2     | Healthcare access and quality index                                                                       | 322             |
| Encephalitis | Female | 0-6 days  | 95+ years | Global     | -1        | 2     | Health System Access (capped)                                                                             | --              |
| Encephalitis | Female | 0-6 days  | 95+ years | Global     | -1        | 2     | LDI (I\$ per capita)                                                                                      | --              |
| Encephalitis | Female | 0-6 days  | 95+ years | Global     | -1        | 3     | Socio-demographic Index                                                                                   | 19              |
| Encephalitis | Female | 0-6 days  | 95+ years | Global     | -1        | 3     | DTP3 Coverage (proportion)                                                                                | --              |
| Encephalitis | Female | 0-6 days  | 95+ years | Global     | -1        | 3     | Improved Water Source (proportion with access)                                                            | --              |
| Encephalitis | Female | 0-6 days  | 95+ years | Global     | -1        | 3     | In-Facility Delivery (proportion)                                                                         | --              |
| Encephalitis | Female | 0-6 days  | 95+ years | Global     | -1        | 3     | Maternal Education (years per capita)                                                                     | --              |
| Encephalitis | Female | 0-6 days  | 95+ years | Global     | -1        | 3     | Sanitation (proportion with access)                                                                       | --              |
| Encephalitis | Male   | 0-6 days  | 95+ years | Data Rich  | 1         | 1     | Underweight (proportion <2SD weight for age, <5 years)                                                    | 546             |
| Encephalitis | Male   | 0-6 days  | 95+ years | Data Rich  | 1         | 1     | Japanese encephalitis endemic area (binary)                                                               | 695             |
| Encephalitis | Male   | 0-6 days  | 95+ years | Data Rich  | -1        | 2     | Healthcare access and quality index                                                                       | 51              |
| Encephalitis | Male   | 0-6 days  | 95+ years | Data Rich  | -1        | 2     | Health System Access (capped)                                                                             | --              |
| Encephalitis | Male   | 0-6 days  | 95+ years | Data Rich  | -1        | 2     | LDI (I\$ per capita)                                                                                      | --              |
| Encephalitis | Male   | 0-6 days  | 95+ years | Data Rich  | -1        | 3     | Improved Water Source (proportion with access)                                                            | 38              |
| Encephalitis | Male   | 0-6 days  | 95+ years | Data Rich  | -1        | 3     | Sanitation (proportion with access)                                                                       | 418             |
| Encephalitis | Male   | 0-6 days  | 95+ years | Data Rich  | -1        | 3     | DTP3 Coverage (proportion)                                                                                | --              |
| Encephalitis | Male   | 0-6 days  | 95+ years | Data Rich  | -1        | 3     | In-Facility Delivery (proportion)                                                                         | --              |
| Encephalitis | Male   | 0-6 days  | 95+ years | Data Rich  | -1        | 3     | Maternal Education (years per capita)                                                                     | --              |
| Encephalitis | Male   | 0-6 days  | 95+ years | Data Rich  | -1        | 3     | Socio-demographic Index                                                                                   | --              |
| Encephalitis | Male   | 0-6 days  | 95+ years | Global     | 1         | 1     | Japanese encephalitis endemic area (binary)                                                               | 548             |
| Encephalitis | Male   | 0-6 days  | 95+ years | Global     | 1         | 1     | Underweight (proportion <2SD weight for age, <5 years)                                                    | --              |
| Encephalitis | Male   | 0-6 days  | 95+ years | Global     | -1        | 2     | Healthcare access and quality index                                                                       | 276             |
| Encephalitis | Male   | 0-6 days  | 95+ years | Global     | -1        | 2     | Health System Access (capped)                                                                             | --              |
| Encephalitis | Male   | 0-6 days  | 95+ years | Global     | -1        | 2     | LDI (I\$ per capita)                                                                                      | --              |
| Encephalitis | Male   | 0-6 days  | 95+ years | Global     | -1        | 3     | Socio-demographic Index                                                                                   | 33              |
| Encephalitis | Male   | 0-6 days  | 95+ years | Global     | -1        | 3     | DTP3 Coverage (proportion)                                                                                | --              |
| Encephalitis | Male   | 0-6 days  | 95+ years | Global     | -1        | 3     | Improved Water Source (proportion with access)                                                            | --              |

**Appendix Table 9: CODEm covariates used, level of covariate, and expected direction of covariate by cause, sex, and age**

*Covariates that CODEm did not select during the covariate selection process have no draw counts listed.*

| Cause           | Sex    | Age Start   | Age End     | Model Type | Direction | Level | Covariate Name                                               | Number of Draws |
|-----------------|--------|-------------|-------------|------------|-----------|-------|--------------------------------------------------------------|-----------------|
| Encephalitis    | Male   | 0-6 days    | 95+ years   | Global     | -1        | 3     | In-Facility Delivery (proportion)                            | --              |
| Encephalitis    | Male   | 0-6 days    | 95+ years   | Global     | -1        | 3     | Maternal Education (years per capita)                        | --              |
| Encephalitis    | Male   | 0-6 days    | 95+ years   | Global     | -1        | 3     | Sanitation (proportion with access)                          | --              |
| Tetanus         | Female | 0-6 days    | 28-364 days | Data Rich  | -1        | 1     | DTP3 Coverage (proportion)                                   | 13              |
| Tetanus         | Female | 0-6 days    | 28-364 days | Data Rich  | -1        | 1     | Tetanus Toxoid Coverage Smooth (proportion)                  | 1000            |
| Tetanus         | Female | 0-6 days    | 28-364 days | Data Rich  | -1        | 2     | In-Facility Delivery (proportion)                            | 115             |
| Tetanus         | Female | 0-6 days    | 28-364 days | Data Rich  | -1        | 2     | Skilled Birth Attendance (proportion)                        | 133             |
| Tetanus         | Female | 0-6 days    | 28-364 days | Data Rich  | -1        | 2     | Healthcare access and quality index                          | 768             |
| Tetanus         | Female | 0-6 days    | 28-364 days | Data Rich  | -1        | 2     | Health System Access (capped)                                | 791             |
| Tetanus         | Female | 0-6 days    | 28-364 days | Data Rich  | -1        | 3     | Education (years per capita)                                 | 238             |
| Tetanus         | Female | 0-6 days    | 28-364 days | Data Rich  | -1        | 3     | Socio-demographic Index                                      | 479             |
| Tetanus         | Female | 0-6 days    | 28-364 days | Data Rich  | -1        | 3     | LDI (IS per capita)                                          | --              |
| Tetanus         | Female | 0-6 days    | 28-364 days | Global     | -1        | 1     | DTP3 Coverage (proportion)                                   | 613             |
| Tetanus         | Female | 0-6 days    | 28-364 days | Global     | -1        | 1     | Tetanus Toxoid Coverage Smooth (proportion)                  | 670             |
| Tetanus         | Female | 0-6 days    | 28-364 days | Global     | -1        | 2     | In-Facility Delivery (proportion)                            | 339             |
| Tetanus         | Female | 0-6 days    | 28-364 days | Global     | -1        | 2     | Healthcare access and quality index                          | 496             |
| Tetanus         | Female | 0-6 days    | 28-364 days | Global     | -1        | 2     | Skilled Birth Attendance (proportion)                        | 629             |
| Tetanus         | Female | 0-6 days    | 28-364 days | Global     | -1        | 2     | Health System Access (capped)                                | 652             |
| Tetanus         | Female | 0-6 days    | 28-364 days | Global     | -1        | 3     | Socio-demographic Index                                      | 353             |
| Tetanus         | Female | 0-6 days    | 28-364 days | Global     | -1        | 3     | Education (years per capita)                                 | 454             |
| Tetanus         | Female | 0-6 days    | 28-364 days | Global     | -1        | 3     | LDI (IS per capita)                                          | --              |
| Tetanus         | Female | 1-4 years   | 95+ years   | Data Rich  | -1        | 1     | DTP3 Coverage (proportion)                                   | 1000            |
| Tetanus         | Female | 1-4 years   | 95+ years   | Data Rich  | -1        | 2     | Healthcare access and quality index                          | 828             |
| Tetanus         | Female | 1-4 years   | 95+ years   | Data Rich  | -1        | 2     | Health System Access (capped)                                | --              |
| Tetanus         | Female | 1-4 years   | 95+ years   | Data Rich  | -1        | 3     | Socio-demographic Index                                      | 537             |
| Tetanus         | Female | 1-4 years   | 95+ years   | Data Rich  | -1        | 3     | Education (years per capita)                                 | 625             |
| Tetanus         | Female | 1-4 years   | 95+ years   | Data Rich  | -1        | 3     | Sanitation (proportion with access)                          | 745             |
| Tetanus         | Female | 1-4 years   | 95+ years   | Data Rich  | -1        | 3     | LDI (IS per capita)                                          | --              |
| Tetanus         | Female | 1-4 years   | 95+ years   | Global     | -1        | 1     | DTP3 Coverage (proportion)                                   | 1000            |
| Tetanus         | Female | 1-4 years   | 95+ years   | Global     | -1        | 2     | Health System Access (capped)                                | 188             |
| Tetanus         | Female | 1-4 years   | 95+ years   | Global     | -1        | 2     | Healthcare access and quality index                          | 540             |
| Tetanus         | Female | 1-4 years   | 95+ years   | Global     | -1        | 3     | Socio-demographic Index                                      | 402             |
| Tetanus         | Female | 1-4 years   | 95+ years   | Global     | -1        | 3     | Education (years per capita)                                 | 496             |
| Tetanus         | Female | 1-4 years   | 95+ years   | Global     | -1        | 3     | Sanitation (proportion with access)                          | 569             |
| Tetanus         | Female | 1-4 years   | 95+ years   | Global     | -1        | 3     | LDI (IS per capita)                                          | --              |
| Tetanus         | Male   | 0-6 days    | 28-364 days | Data Rich  | -1        | 1     | DTP3 Coverage (proportion)                                   | 428             |
| Tetanus         | Male   | 0-6 days    | 28-364 days | Data Rich  | -1        | 1     | Tetanus Toxoid Coverage Smooth (proportion)                  | 819             |
| Tetanus         | Male   | 0-6 days    | 28-364 days | Data Rich  | -1        | 2     | Skilled Birth Attendance (proportion)                        | 124             |
| Tetanus         | Male   | 0-6 days    | 28-364 days | Data Rich  | -1        | 2     | In-Facility Delivery (proportion)                            | 199             |
| Tetanus         | Male   | 0-6 days    | 28-364 days | Data Rich  | -1        | 2     | Healthcare access and quality index                          | 216             |
| Tetanus         | Male   | 0-6 days    | 28-364 days | Data Rich  | -1        | 2     | Health System Access (capped)                                | 278             |
| Tetanus         | Male   | 0-6 days    | 28-364 days | Data Rich  | -1        | 3     | Socio-demographic Index                                      | 550             |
| Tetanus         | Male   | 0-6 days    | 28-364 days | Data Rich  | -1        | 3     | Education (years per capita)                                 | 728             |
| Tetanus         | Male   | 0-6 days    | 28-364 days | Data Rich  | -1        | 3     | LDI (IS per capita)                                          | --              |
| Tetanus         | Male   | 0-6 days    | 28-364 days | Global     | -1        | 1     | Tetanus Toxoid Coverage Smooth (proportion)                  | 615             |
| Tetanus         | Male   | 0-6 days    | 28-364 days | Global     | -1        | 1     | DTP3 Coverage (proportion)                                   | 688             |
| Tetanus         | Male   | 0-6 days    | 28-364 days | Global     | -1        | 2     | Health System Access (capped)                                | 524             |
| Tetanus         | Male   | 0-6 days    | 28-364 days | Global     | -1        | 2     | Skilled Birth Attendance (proportion)                        | 714             |
| Tetanus         | Male   | 0-6 days    | 28-364 days | Global     | -1        | 2     | In-Facility Delivery (proportion)                            | 744             |
| Tetanus         | Male   | 0-6 days    | 28-364 days | Global     | -1        | 2     | Healthcare access and quality index                          | 766             |
| Tetanus         | Male   | 0-6 days    | 28-364 days | Global     | -1        | 3     | Education (years per capita)                                 | 238             |
| Tetanus         | Male   | 0-6 days    | 28-364 days | Global     | -1        | 3     | Socio-demographic Index                                      | 327             |
| Tetanus         | Male   | 0-6 days    | 28-364 days | Global     | -1        | 3     | LDI (IS per capita)                                          | --              |
| Tetanus         | Male   | 1-4 years   | 95+ years   | Data Rich  | -1        | 1     | DTP3 Coverage (proportion)                                   | 1000            |
| Tetanus         | Male   | 1-4 years   | 95+ years   | Data Rich  | -1        | 2     | Health System Access (capped)                                | 514             |
| Tetanus         | Male   | 1-4 years   | 95+ years   | Data Rich  | -1        | 2     | Healthcare access and quality index                          | --              |
| Tetanus         | Male   | 1-4 years   | 95+ years   | Data Rich  | -1        | 3     | Socio-demographic Index                                      | 548             |
| Tetanus         | Male   | 1-4 years   | 95+ years   | Data Rich  | -1        | 3     | Education (years per capita)                                 | --              |
| Tetanus         | Male   | 1-4 years   | 95+ years   | Data Rich  | -1        | 3     | LDI (IS per capita)                                          | --              |
| Tetanus         | Male   | 1-4 years   | 95+ years   | Data Rich  | -1        | 3     | Sanitation (proportion with access)                          | --              |
| Tetanus         | Male   | 1-4 years   | 95+ years   | Global     | -1        | 1     | DTP3 Coverage (proportion)                                   | 665             |
| Tetanus         | Male   | 1-4 years   | 95+ years   | Global     | -1        | 2     | Health System Access (capped)                                | 351             |
| Tetanus         | Male   | 1-4 years   | 95+ years   | Global     | -1        | 2     | Healthcare access and quality index                          | 576             |
| Tetanus         | Male   | 1-4 years   | 95+ years   | Global     | -1        | 3     | Socio-demographic Index                                      | 660             |
| Tetanus         | Male   | 1-4 years   | 95+ years   | Global     | -1        | 3     | Education (years per capita)                                 | 786             |
| Tetanus         | Male   | 1-4 years   | 95+ years   | Global     | -1        | 3     | Sanitation (proportion with access)                          | 786             |
| Tetanus         | Male   | 1-4 years   | 95+ years   | Global     | -1        | 3     | LDI (IS per capita)                                          | --              |
| Acute hepatitis | Female | 28-364 days | 95+ years   | Data Rich  | 1         | 1     | Seroprevalence of anti-HAV (IgG)                             | 474             |
| Acute hepatitis | Female | 28-364 days | 95+ years   | Data Rich  | 1         | 1     | Hepatitis B (HBsAg) Seroprevalence                           | 770             |
| Acute hepatitis | Female | 28-364 days | 95+ years   | Data Rich  | 1         | 1     | Hepatitis C (IgG) Seroprevalence                             | --              |
| Acute hepatitis | Female | 28-364 days | 95+ years   | Data Rich  | 1         | 1     | Log-transformed SEV scalar: Hep                              | --              |
| Acute hepatitis | Female | 28-364 days | 95+ years   | Data Rich  | 1         | 1     | Seroprevalence of anti-HEV (IgG)                             | --              |
| Acute hepatitis | Female | 28-364 days | 95+ years   | Data Rich  | -1        | 2     | Socio-demographic Index                                      | 170             |
| Acute hepatitis | Female | 28-364 days | 95+ years   | Data Rich  | -1        | 2     | Healthcare access and quality index                          | 194             |
| Acute hepatitis | Female | 28-364 days | 95+ years   | Data Rich  | -1        | 2     | Hepatitis B vaccine coverage (proportion), aged through time | 282             |
| Acute hepatitis | Female | 28-364 days | 95+ years   | Data Rich  | 1         | 2     | SEV unsafe sanitation                                        | 122             |
| Acute hepatitis | Female | 28-364 days | 95+ years   | Data Rich  | 1         | 2     | SEV unsafe water                                             | 304             |
| Acute hepatitis | Female | 28-364 days | 95+ years   | Data Rich  | -1        | 3     | Education (years per capita)                                 | 24              |

**Appendix Table 9: CODEm covariates used, level of covariate, and expected direction of covariate by cause, sex, and age**

*Covariates that CODEm did not select during the covariate selection process have no draw counts listed.*

| Cause                                 | Sex    | Age Start   | Age End   | Model Type | Direction | Level | Covariate Name                                               | Number of Draws |
|---------------------------------------|--------|-------------|-----------|------------|-----------|-------|--------------------------------------------------------------|-----------------|
| Acute hepatitis                       | Female | 28-364 days | 95+ years | Data Rich  | -1        | 3     | LDI (I\$ per capita)                                         | --              |
| Acute hepatitis                       | Female | 28-364 days | 95+ years | Global     | 1         | 1     | Hepatitis B (HBsAg) Seroprevalence                           | 369             |
| Acute hepatitis                       | Female | 28-364 days | 95+ years | Global     | 1         | 1     | Seroprevalence of anti-HAV (IgG)                             | 725             |
| Acute hepatitis                       | Female | 28-364 days | 95+ years | Global     | 1         | 1     | Hepatitis C (IgG) Seroprevalence                             | --              |
| Acute hepatitis                       | Female | 28-364 days | 95+ years | Global     | 1         | 1     | Log-transformed SEV scalar: Hep                              | --              |
| Acute hepatitis                       | Female | 28-364 days | 95+ years | Global     | 1         | 1     | Seroprevalence of anti-HEV (IgG)                             | --              |
| Acute hepatitis                       | Female | 28-364 days | 95+ years | Global     | -1        | 2     | Healthcare access and quality index                          | 221             |
| Acute hepatitis                       | Female | 28-364 days | 95+ years | Global     | -1        | 2     | Hepatitis B vaccine coverage (proportion), aged through time | 313             |
| Acute hepatitis                       | Female | 28-364 days | 95+ years | Global     | -1        | 2     | Socio-demographic Index                                      | 323             |
| Acute hepatitis                       | Female | 28-364 days | 95+ years | Global     | 1         | 2     | SEV unsafe sanitation                                        | 396             |
| Acute hepatitis                       | Female | 28-364 days | 95+ years | Global     | 1         | 2     | SEV unsafe water                                             | 621             |
| Acute hepatitis                       | Female | 28-364 days | 95+ years | Global     | -1        | 3     | Education (years per capita)                                 | 295             |
| Acute hepatitis                       | Female | 28-364 days | 95+ years | Global     | -1        | 3     | LDI (I\$ per capita)                                         | --              |
| Acute hepatitis                       | Male   | 28-364 days | 95+ years | Data Rich  | 1         | 1     | Seroprevalence of anti-HAV (IgG)                             | 172             |
| Acute hepatitis                       | Male   | 28-364 days | 95+ years | Data Rich  | 1         | 1     | Hepatitis B (HBsAg) Seroprevalence                           | 865             |
| Acute hepatitis                       | Male   | 28-364 days | 95+ years | Data Rich  | 1         | 1     | Hepatitis C (IgG) Seroprevalence                             | --              |
| Acute hepatitis                       | Male   | 28-364 days | 95+ years | Data Rich  | 1         | 1     | Seroprevalence of anti-HEV (IgG)                             | --              |
| Acute hepatitis                       | Male   | 28-364 days | 95+ years | Data Rich  | -1        | 2     | Healthcare access and quality index                          | 20              |
| Acute hepatitis                       | Male   | 28-364 days | 95+ years | Data Rich  | -1        | 2     | Hepatitis B vaccine coverage (proportion), aged through time | 453             |
| Acute hepatitis                       | Male   | 28-364 days | 95+ years | Data Rich  | 1         | 2     | Log-transformed SEV scalar: Hep                              | 59              |
| Acute hepatitis                       | Male   | 28-364 days | 95+ years | Data Rich  | 1         | 2     | SEV unsafe sanitation                                        | 231             |
| Acute hepatitis                       | Male   | 28-364 days | 95+ years | Data Rich  | 1         | 2     | SEV unsafe water                                             | 233             |
| Acute hepatitis                       | Male   | 28-364 days | 95+ years | Data Rich  | -1        | 3     | Education (years per capita)                                 | 43              |
| Acute hepatitis                       | Male   | 28-364 days | 95+ years | Data Rich  | -1        | 3     | Socio-demographic Index                                      | 133             |
| Acute hepatitis                       | Male   | 28-364 days | 95+ years | Data Rich  | -1        | 3     | LDI (I\$ per capita)                                         | --              |
| Acute hepatitis                       | Male   | 28-364 days | 95+ years | Global     | 1         | 1     | Log-transformed SEV scalar: Hep                              | 230             |
| Acute hepatitis                       | Male   | 28-364 days | 95+ years | Global     | 1         | 1     | Hepatitis B (HBsAg) Seroprevalence                           | 523             |
| Acute hepatitis                       | Male   | 28-364 days | 95+ years | Global     | 1         | 1     | Seroprevalence of anti-HAV (IgG)                             | 603             |
| Acute hepatitis                       | Male   | 28-364 days | 95+ years | Global     | 1         | 1     | Hepatitis C (IgG) Seroprevalence                             | --              |
| Acute hepatitis                       | Male   | 28-364 days | 95+ years | Global     | 1         | 1     | Seroprevalence of anti-HEV (IgG)                             | --              |
| Acute hepatitis                       | Male   | 28-364 days | 95+ years | Global     | -1        | 2     | Socio-demographic Index                                      | 31              |
| Acute hepatitis                       | Male   | 28-364 days | 95+ years | Global     | -1        | 2     | Healthcare access and quality index                          | 238             |
| Acute hepatitis                       | Male   | 28-364 days | 95+ years | Global     | -1        | 2     | Hepatitis B vaccine coverage (proportion), aged through time | 453             |
| Acute hepatitis                       | Male   | 28-364 days | 95+ years | Global     | 1         | 2     | SEV unsafe sanitation                                        | 227             |
| Acute hepatitis                       | Male   | 28-364 days | 95+ years | Global     | 1         | 2     | SEV unsafe water                                             | 299             |
| Acute hepatitis                       | Male   | 28-364 days | 95+ years | Global     | -1        | 3     | Education (years per capita)                                 | 36              |
| Acute hepatitis                       | Male   | 28-364 days | 95+ years | Global     | -1        | 3     | LDI (I\$ per capita)                                         | --              |
| Other unspecified infectious diseases | Female | 0-6 days    | 95+ years | Data Rich  | -1        | 1     | DTP3 Coverage (proportion)                                   | 525             |
| Other unspecified infectious diseases | Female | 0-6 days    | 95+ years | Data Rich  | -1        | 1     | Health System Access (unitless)                              | --              |
| Other unspecified infectious diseases | Female | 0-6 days    | 95+ years | Data Rich  | -1        | 1     | Measles Vaccine Coverage (proportion)                        | --              |
| Other unspecified infectious diseases | Female | 0-6 days    | 95+ years | Data Rich  | -1        | 2     | Antenatal Care (1 visit) Coverage (proportion)               | --              |
| Other unspecified infectious diseases | Female | 0-6 days    | 95+ years | Data Rich  | -1        | 2     | Health System Access (capped)                                | --              |
| Other unspecified infectious diseases | Female | 0-6 days    | 95+ years | Data Rich  | -1        | 2     | Healthcare access and quality index                          | --              |
| Other unspecified infectious diseases | Female | 0-6 days    | 95+ years | Data Rich  | -1        | 2     | Improved Water Source (proportion with access)               | --              |
| Other unspecified infectious diseases | Female | 0-6 days    | 95+ years | Data Rich  | -1        | 2     | Latitude Over 45 (proportion)                                | --              |
| Other unspecified infectious diseases | Female | 0-6 days    | 95+ years | Data Rich  | -1        | 2     | Rainfall Quintile 1 (proportion)                             | --              |
| Other unspecified infectious diseases | Female | 0-6 days    | 95+ years | Data Rich  | -1        | 2     | Sanitation (proportion with access)                          | --              |
| Other unspecified infectious diseases | Female | 0-6 days    | 95+ years | Data Rich  | 0         | 2     | Rainfall Quintile 2 (proportion)                             | 236             |
| Other unspecified infectious diseases | Female | 0-6 days    | 95+ years | Data Rich  | 0         | 2     | Rainfall Quintile 4 (proportion)                             | 236             |
| Other unspecified infectious diseases | Female | 0-6 days    | 95+ years | Data Rich  | 0         | 2     | Latitude 30 to 45 (proportion)                               | 246             |
| Other unspecified infectious diseases | Female | 0-6 days    | 95+ years | Data Rich  | 0         | 2     | Latitude 15 to 30 (proportion)                               | 452             |
| Other unspecified infectious diseases | Female | 0-6 days    | 95+ years | Data Rich  | 0         | 2     | Rainfall Quintile 3 (proportion)                             | 620             |
| Other unspecified infectious diseases | Female | 0-6 days    | 95+ years | Data Rich  | 1         | 2     | Latitude Under 15 (proportion)                               | 431             |
| Other unspecified infectious diseases | Female | 0-6 days    | 95+ years | Data Rich  | 1         | 2     | Rainfall Quintile 5 (proportion)                             | --              |
| Other unspecified infectious diseases | Female | 0-6 days    | 95+ years | Data Rich  | 1         | 2     | Underweight (proportion <2SD weight for age, <5 years)       | --              |
| Other unspecified infectious diseases | Female | 0-6 days    | 95+ years | Data Rich  | -1        | 3     | Education (years per capita)                                 | --              |
| Other unspecified infectious diseases | Female | 0-6 days    | 95+ years | Data Rich  | -1        | 3     | LDI (I\$ per capita)                                         | --              |
| Other unspecified infectious diseases | Female | 0-6 days    | 95+ years | Data Rich  | -1        | 3     | Socio-demographic Index                                      | --              |
| Other unspecified infectious diseases | Female | 0-6 days    | 95+ years | Global     | -1        | 1     | Antenatal Care (1 visit) Coverage (proportion)               | --              |
| Other unspecified infectious diseases | Female | 0-6 days    | 95+ years | Global     | 1         | 1     | Underweight (proportion <2SD weight for age, <5 years)       | 1000            |
| Other unspecified infectious diseases | Female | 0-6 days    | 95+ years | Global     | -1        | 2     | Sanitation (proportion with access)                          | 459             |
| Other unspecified infectious diseases | Female | 0-6 days    | 95+ years | Global     | -1        | 2     | Latitude Over 45 (proportion)                                | 662             |
| Other unspecified infectious diseases | Female | 0-6 days    | 95+ years | Global     | -1        | 2     | Healthcare access and quality index                          | --              |
| Other unspecified infectious diseases | Female | 0-6 days    | 95+ years | Global     | -1        | 2     | Improved Water Source (proportion with access)               | --              |
| Other unspecified infectious diseases | Female | 0-6 days    | 95+ years | Global     | -1        | 3     | DTP3 Coverage (proportion)                                   | --              |
| Other unspecified infectious diseases | Female | 0-6 days    | 95+ years | Global     | -1        | 3     | Socio-demographic Index                                      | --              |
| Other unspecified infectious diseases | Female | 0-6 days    | 95+ years | Global     | 0         | 3     | Latitude 30 to 45 (proportion)                               | 557             |
| Other unspecified infectious diseases | Female | 0-6 days    | 95+ years | Global     | 0         | 3     | Latitude 15 to 30 (proportion)                               | 582             |
| Other unspecified infectious diseases | Female | 0-6 days    | 95+ years | Global     | 1         | 3     | Latitude Under 15 (proportion)                               | 573             |
| Other unspecified infectious diseases | Male   | 0-6 days    | 95+ years | Data Rich  | -1        | 1     | Measles Vaccine Coverage (proportion)                        | 892             |
| Other unspecified infectious diseases | Male   | 0-6 days    | 95+ years | Data Rich  | -1        | 1     | DTP3 Coverage (proportion)                                   | --              |
| Other unspecified infectious diseases | Male   | 0-6 days    | 95+ years | Data Rich  | -1        | 1     | Health System Access (unitless)                              | --              |
| Other unspecified infectious diseases | Male   | 0-6 days    | 95+ years | Data Rich  | -1        | 2     | Antenatal Care (1 visit) Coverage (proportion)               | --              |
| Other unspecified infectious diseases | Male   | 0-6 days    | 95+ years | Data Rich  | -1        | 2     | Improved Water Source (proportion with access)               | --              |
| Other unspecified infectious diseases | Male   | 0-6 days    | 95+ years | Data Rich  | -1        | 2     | Latitude Over 45 (proportion)                                | --              |
| Other unspecified infectious diseases | Male   | 0-6 days    | 95+ years | Data Rich  | -1        | 2     | Rainfall Quintile 1 (proportion)                             | --              |
| Other unspecified infectious diseases | Male   | 0-6 days    | 95+ years | Data Rich  | -1        | 2     | Sanitation (proportion with access)                          | --              |
| Other unspecified infectious diseases | Male   | 0-6 days    | 95+ years | Data Rich  | 0         | 2     | Latitude 15 to 30 (proportion)                               | 108             |

**Appendix Table 9: CODEm covariates used, level of covariate, and expected direction of covariate by cause, sex, and age**

*Covariates that CODEm did not select during the covariate selection process have no draw counts listed.*

| Cause                                 | Sex    | Age Start | Age End   | Model Type | Direction | Level | Covariate Name                                         | Number of Draws |
|---------------------------------------|--------|-----------|-----------|------------|-----------|-------|--------------------------------------------------------|-----------------|
| Other unspecified infectious diseases | Male   | 0-6 days  | 95+ years | Data Rich  | 0         | 2     | Latitude 30 to 45 (proportion)                         | 108             |
| Other unspecified infectious diseases | Male   | 0-6 days  | 95+ years | Data Rich  | 0         | 2     | Rainfall Quintile 4 (proportion)                       | 162             |
| Other unspecified infectious diseases | Male   | 0-6 days  | 95+ years | Data Rich  | 0         | 2     | Rainfall Quintile 3 (proportion)                       | 434             |
| Other unspecified infectious diseases | Male   | 0-6 days  | 95+ years | Data Rich  | 0         | 2     | Rainfall Quintile 2 (proportion)                       | 492             |
| Other unspecified infectious diseases | Male   | 0-6 days  | 95+ years | Data Rich  | 1         | 2     | Rainfall Quintile 5 (proportion)                       | 374             |
| Other unspecified infectious diseases | Male   | 0-6 days  | 95+ years | Data Rich  | 1         | 2     | Latitude Under 15 (proportion)                         | --              |
| Other unspecified infectious diseases | Male   | 0-6 days  | 95+ years | Data Rich  | 1         | 2     | Underweight (proportion <2SD weight for age, <5 years) | --              |
| Other unspecified infectious diseases | Male   | 0-6 days  | 95+ years | Data Rich  | -1        | 3     | Education (years per capita)                           | --              |
| Other unspecified infectious diseases | Male   | 0-6 days  | 95+ years | Data Rich  | -1        | 3     | LDI (IS per capita)                                    | --              |
| Other unspecified infectious diseases | Male   | 0-6 days  | 95+ years | Data Rich  | -1        | 3     | Socio-demographic Index                                | --              |
| Other unspecified infectious diseases | Male   | 0-6 days  | 95+ years | Global     | -1        | 1     | Antenatal Care (1 visit) Coverage (proportion)         | 381             |
| Other unspecified infectious diseases | Male   | 0-6 days  | 95+ years | Global     | 1         | 1     | Underweight (proportion <2SD weight for age, <5 years) | 884             |
| Other unspecified infectious diseases | Male   | 0-6 days  | 95+ years | Global     | -1        | 2     | Improved Water Source (proportion with access)         | 358             |
| Other unspecified infectious diseases | Male   | 0-6 days  | 95+ years | Global     | -1        | 2     | Sanitation (proportion with access)                    | 358             |
| Other unspecified infectious diseases | Male   | 0-6 days  | 95+ years | Global     | -1        | 2     | Latitude Over 45 (proportion)                          | 532             |
| Other unspecified infectious diseases | Male   | 0-6 days  | 95+ years | Global     | -1        | 3     | DTP3 Coverage (proportion)                             | --              |
| Other unspecified infectious diseases | Male   | 0-6 days  | 95+ years | Global     | -1        | 3     | Socio-demographic Index                                | --              |
| Other unspecified infectious diseases | Male   | 0-6 days  | 95+ years | Global     | 0         | 3     | Latitude 30 to 45 (proportion)                         | 545             |
| Other unspecified infectious diseases | Male   | 0-6 days  | 95+ years | Global     | 0         | 3     | Latitude 15 to 30 (proportion)                         | 576             |
| Other unspecified infectious diseases | Male   | 0-6 days  | 95+ years | Global     | 1         | 3     | Latitude Under 15 (proportion)                         | 165             |
| Neonatal disorders                    | Female | 0-6 days  | 1-4 years | Data Rich  | 1         | 1     | Indoor Air Pollution (All Cooking Fuels)               | 177             |
| Neonatal disorders                    | Female | 0-6 days  | 1-4 years | Data Rich  | 1         | 1     | Smoking Prevalence (Reproductive Age Standardized)     | 743             |
| Neonatal disorders                    | Female | 0-6 days  | 1-4 years | Data Rich  | -1        | 2     | In-Facility Delivery (proportion)                      | 61              |
| Neonatal disorders                    | Female | 0-6 days  | 1-4 years | Data Rich  | -1        | 2     | Antenatal Care (4 visits) Coverage (proportion)        | 103             |
| Neonatal disorders                    | Female | 0-6 days  | 1-4 years | Data Rich  | -1        | 2     | Skilled Birth Attendance (proportion)                  | 150             |
| Neonatal disorders                    | Female | 0-6 days  | 1-4 years | Data Rich  | -1        | 2     | Healthcare access and quality index                    | 253             |
| Neonatal disorders                    | Female | 0-6 days  | 1-4 years | Data Rich  | -1        | 2     | Health System Access (capped)                          | 497             |
| Neonatal disorders                    | Female | 0-6 days  | 1-4 years | Data Rich  | 1         | 2     | Age-standardized underweight (weight-for-age) SEV      | 80              |
| Neonatal disorders                    | Female | 0-6 days  | 1-4 years | Data Rich  | 1         | 2     | Live Births 35+ (proportion)                           | 187             |
| Neonatal disorders                    | Female | 0-6 days  | 1-4 years | Data Rich  | -1        | 3     | Socio-demographic Index                                | 80              |
| Neonatal disorders                    | Female | 0-6 days  | 1-4 years | Data Rich  | -1        | 3     | Education (years per capita)                           | 126             |
| Neonatal disorders                    | Female | 0-6 days  | 1-4 years | Data Rich  | -1        | 3     | LDI (IS per capita)                                    | --              |
| Neonatal disorders                    | Female | 0-6 days  | 1-4 years | Data Rich  | 1         | 3     | Total Fertility Rate                                   | --              |
| Neonatal disorders                    | Female | 0-6 days  | 1-4 years | Global     | 1         | 1     | Indoor Air Pollution (All Cooking Fuels)               | 169             |
| Neonatal disorders                    | Female | 0-6 days  | 1-4 years | Global     | 1         | 1     | Smoking Prevalence (Reproductive Age Standardized)     | 581             |
| Neonatal disorders                    | Female | 0-6 days  | 1-4 years | Global     | -1        | 2     | Health System Access (capped)                          | 47              |
| Neonatal disorders                    | Female | 0-6 days  | 1-4 years | Global     | -1        | 2     | Antenatal Care (4 visits) Coverage (proportion)        | 48              |
| Neonatal disorders                    | Female | 0-6 days  | 1-4 years | Global     | -1        | 2     | In-Facility Delivery (proportion)                      | 89              |
| Neonatal disorders                    | Female | 0-6 days  | 1-4 years | Global     | -1        | 2     | Skilled Birth Attendance (proportion)                  | 89              |
| Neonatal disorders                    | Female | 0-6 days  | 1-4 years | Global     | -1        | 2     | Healthcare access and quality index                    | 356             |
| Neonatal disorders                    | Female | 0-6 days  | 1-4 years | Global     | 1         | 2     | Age-standardized underweight (weight-for-age) SEV      | 137             |
| Neonatal disorders                    | Female | 0-6 days  | 1-4 years | Global     | 1         | 2     | Live Births 35+ (proportion)                           | 323             |
| Neonatal disorders                    | Female | 0-6 days  | 1-4 years | Global     | -1        | 3     | Education (years per capita)                           | 125             |
| Neonatal disorders                    | Female | 0-6 days  | 1-4 years | Global     | -1        | 3     | Socio-demographic Index                                | 150             |
| Neonatal disorders                    | Female | 0-6 days  | 1-4 years | Global     | -1        | 3     | LDI (IS per capita)                                    | --              |
| Neonatal disorders                    | Female | 0-6 days  | 1-4 years | Global     | 1         | 3     | Total Fertility Rate                                   | --              |
| Neonatal disorders                    | Male   | 0-6 days  | 1-4 years | Data Rich  | 1         | 1     | Smoking Prevalence (Reproductive Age Standardized)     | 316             |
| Neonatal disorders                    | Male   | 0-6 days  | 1-4 years | Data Rich  | 1         | 1     | Indoor Air Pollution (All Cooking Fuels)               | 498             |
| Neonatal disorders                    | Male   | 0-6 days  | 1-4 years | Data Rich  | -1        | 2     | Antenatal Care (4 visits) Coverage (proportion)        | 8               |
| Neonatal disorders                    | Male   | 0-6 days  | 1-4 years | Data Rich  | -1        | 2     | Skilled Birth Attendance (proportion)                  | 166             |
| Neonatal disorders                    | Male   | 0-6 days  | 1-4 years | Data Rich  | -1        | 2     | In-Facility Delivery (proportion)                      | 240             |
| Neonatal disorders                    | Male   | 0-6 days  | 1-4 years | Data Rich  | -1        | 2     | Health System Access (capped)                          | --              |
| Neonatal disorders                    | Male   | 0-6 days  | 1-4 years | Data Rich  | -1        | 2     | Healthcare access and quality index                    | --              |
| Neonatal disorders                    | Male   | 0-6 days  | 1-4 years | Data Rich  | 1         | 2     | Age-standardized underweight (weight-for-age) SEV      | 210             |
| Neonatal disorders                    | Male   | 0-6 days  | 1-4 years | Data Rich  | 1         | 2     | Live Births 35+ (proportion)                           | 250             |
| Neonatal disorders                    | Male   | 0-6 days  | 1-4 years | Data Rich  | -1        | 3     | Socio-demographic Index                                | 61              |
| Neonatal disorders                    | Male   | 0-6 days  | 1-4 years | Data Rich  | -1        | 3     | Education (years per capita)                           | 70              |
| Neonatal disorders                    | Male   | 0-6 days  | 1-4 years | Data Rich  | -1        | 3     | LDI (IS per capita)                                    | --              |
| Neonatal disorders                    | Male   | 0-6 days  | 1-4 years | Data Rich  | 1         | 3     | Total Fertility Rate                                   | --              |
| Neonatal disorders                    | Male   | 0-6 days  | 1-4 years | Global     | 1         | 1     | Indoor Air Pollution (All Cooking Fuels)               | 387             |
| Neonatal disorders                    | Male   | 0-6 days  | 1-4 years | Global     | 1         | 1     | Smoking Prevalence (Reproductive Age Standardized)     | 394             |
| Neonatal disorders                    | Male   | 0-6 days  | 1-4 years | Global     | -1        | 2     | Antenatal Care (4 visits) Coverage (proportion)        | 57              |
| Neonatal disorders                    | Male   | 0-6 days  | 1-4 years | Global     | -1        | 2     | In-Facility Delivery (proportion)                      | 92              |
| Neonatal disorders                    | Male   | 0-6 days  | 1-4 years | Global     | -1        | 2     | Skilled Birth Attendance (proportion)                  | 210             |
| Neonatal disorders                    | Male   | 0-6 days  | 1-4 years | Global     | -1        | 2     | Health System Access (capped)                          | 217             |
| Neonatal disorders                    | Male   | 0-6 days  | 1-4 years | Global     | -1        | 2     | Healthcare access and quality index                    | --              |
| Neonatal disorders                    | Male   | 0-6 days  | 1-4 years | Global     | 1         | 2     | Age-standardized underweight (weight-for-age) SEV      | 248             |
| Neonatal disorders                    | Male   | 0-6 days  | 1-4 years | Global     | 1         | 2     | Live Births 35+ (proportion)                           | 323             |
| Neonatal disorders                    | Male   | 0-6 days  | 1-4 years | Global     | -1        | 3     | Socio-demographic Index                                | 85              |
| Neonatal disorders                    | Male   | 0-6 days  | 1-4 years | Global     | -1        | 3     | Education (years per capita)                           | 156             |
| Neonatal disorders                    | Male   | 0-6 days  | 1-4 years | Global     | -1        | 3     | LDI (IS per capita)                                    | --              |
| Neonatal disorders                    | Male   | 0-6 days  | 1-4 years | Global     | 1         | 3     | Total Fertility Rate                                   | --              |
| Neonatal preterm birth                | Female | 0-6 days  | 1-4 years | Data Rich  | -1        | 1     | Health System Access (capped)                          | 700             |
| Neonatal preterm birth                | Female | 0-6 days  | 1-4 years | Data Rich  | 1         | 1     | Indoor Air Pollution (All Cooking Fuels)               | 12              |
| Neonatal preterm birth                | Female | 0-6 days  | 1-4 years | Data Rich  | 1         | 1     | Smoking Prevalence (Reproductive Age Standardized)     | 396             |
| Neonatal preterm birth                | Female | 0-6 days  | 1-4 years | Data Rich  | -1        | 2     | In-Facility Delivery (proportion)                      | 1               |
| Neonatal preterm birth                | Female | 0-6 days  | 1-4 years | Data Rich  | -1        | 2     | Skilled Birth Attendance (proportion)                  | 53              |
| Neonatal preterm birth                | Female | 0-6 days  | 1-4 years | Data Rich  | -1        | 2     | Antenatal Care (4 visits) Coverage (proportion)        | 106             |



**Appendix Table 9: CODEm covariates used, level of covariate, and expected direction of covariate by cause, sex, and age**

*Covariates that CODEm did not select during the covariate selection process have no draw counts listed.*

| Cause                                                    | Sex    | Age Start | Age End   | Model Type | Direction | Level | Covariate Name                                     | Number of Draws |
|----------------------------------------------------------|--------|-----------|-----------|------------|-----------|-------|----------------------------------------------------|-----------------|
| Neonatal preterm birth                                   | Female | 0-6 days  | 1-4 years | Data Rich  | -1        | 2     | Healthcare access and quality index                | 483             |
| Neonatal preterm birth                                   | Female | 0-6 days  | 1-4 years | Data Rich  | 1         | 2     | Age-standardized underweight (weight-for-age) SEV  | 54              |
| Neonatal preterm birth                                   | Female | 0-6 days  | 1-4 years | Data Rich  | 1         | 2     | Live Births 35+ (proportion)                       | 191             |
| Neonatal preterm birth                                   | Female | 0-6 days  | 1-4 years | Data Rich  | -1        | 3     | Education (years per capita)                       | 27              |
| Neonatal preterm birth                                   | Female | 0-6 days  | 1-4 years | Data Rich  | -1        | 3     | Socio-demographic Index                            | 197             |
| Neonatal preterm birth                                   | Female | 0-6 days  | 1-4 years | Data Rich  | -1        | 3     | LDI (IS per capita)                                | --              |
| Neonatal preterm birth                                   | Female | 0-6 days  | 1-4 years | Data Rich  | 1         | 3     | Total Fertility Rate                               | --              |
| Neonatal preterm birth                                   | Female | 0-6 days  | 1-4 years | Global     | -1        | 1     | Health System Access (capped)                      | 610             |
| Neonatal preterm birth                                   | Female | 0-6 days  | 1-4 years | Global     | 1         | 1     | Indoor Air Pollution (All Cooking Fuels)           | 79              |
| Neonatal preterm birth                                   | Female | 0-6 days  | 1-4 years | Global     | 1         | 1     | Smoking Prevalence (Reproductive Age Standardized) | 199             |
| Neonatal preterm birth                                   | Female | 0-6 days  | 1-4 years | Global     | -1        | 2     | Antenatal Care (4 visits) Coverage (proportion)    | 18              |
| Neonatal preterm birth                                   | Female | 0-6 days  | 1-4 years | Global     | -1        | 2     | In-Facility Delivery (proportion)                  | 106             |
| Neonatal preterm birth                                   | Female | 0-6 days  | 1-4 years | Global     | -1        | 2     | Skilled Birth Attendance (proportion)              | 114             |
| Neonatal preterm birth                                   | Female | 0-6 days  | 1-4 years | Global     | -1        | 2     | Healthcare access and quality index                | 412             |
| Neonatal preterm birth                                   | Female | 0-6 days  | 1-4 years | Global     | 1         | 2     | Age-standardized underweight (weight-for-age) SEV  | 248             |
| Neonatal preterm birth                                   | Female | 0-6 days  | 1-4 years | Global     | 1         | 2     | Live Births 35+ (proportion)                       | 324             |
| Neonatal preterm birth                                   | Female | 0-6 days  | 1-4 years | Global     | -1        | 3     | Education (years per capita)                       | 53              |
| Neonatal preterm birth                                   | Female | 0-6 days  | 1-4 years | Global     | -1        | 3     | Socio-demographic Index                            | 131             |
| Neonatal preterm birth                                   | Female | 0-6 days  | 1-4 years | Global     | -1        | 3     | LDI (IS per capita)                                | --              |
| Neonatal preterm birth                                   | Female | 0-6 days  | 1-4 years | Global     | 1         | 3     | Total Fertility Rate                               | --              |
| Neonatal preterm birth                                   | Male   | 0-6 days  | 1-4 years | Data Rich  | -1        | 1     | Health System Access (capped)                      | 759             |
| Neonatal preterm birth                                   | Male   | 0-6 days  | 1-4 years | Data Rich  | 1         | 1     | Indoor Air Pollution (All Cooking Fuels)           | 19              |
| Neonatal preterm birth                                   | Male   | 0-6 days  | 1-4 years | Data Rich  | 1         | 1     | Smoking Prevalence (Reproductive Age Standardized) | 32              |
| Neonatal preterm birth                                   | Male   | 0-6 days  | 1-4 years | Data Rich  | -1        | 2     | Antenatal Care (4 visits) Coverage (proportion)    | 42              |
| Neonatal preterm birth                                   | Male   | 0-6 days  | 1-4 years | Data Rich  | -1        | 2     | Healthcare access and quality index                | 122             |
| Neonatal preterm birth                                   | Male   | 0-6 days  | 1-4 years | Data Rich  | -1        | 2     | In-Facility Delivery (proportion)                  | 122             |
| Neonatal preterm birth                                   | Male   | 0-6 days  | 1-4 years | Data Rich  | -1        | 2     | Skilled Birth Attendance (proportion)              | 187             |
| Neonatal preterm birth                                   | Male   | 0-6 days  | 1-4 years | Data Rich  | 1         | 2     | Live Births 35+ (proportion)                       | 193             |
| Neonatal preterm birth                                   | Male   | 0-6 days  | 1-4 years | Data Rich  | 1         | 2     | Age-standardized underweight (weight-for-age) SEV  | 231             |
| Neonatal preterm birth                                   | Male   | 0-6 days  | 1-4 years | Data Rich  | -1        | 3     | Education (years per capita)                       | 44              |
| Neonatal preterm birth                                   | Male   | 0-6 days  | 1-4 years | Data Rich  | -1        | 3     | Socio-demographic Index                            | 172             |
| Neonatal preterm birth                                   | Male   | 0-6 days  | 1-4 years | Data Rich  | -1        | 3     | LDI (IS per capita)                                | --              |
| Neonatal preterm birth                                   | Male   | 0-6 days  | 1-4 years | Data Rich  | 1         | 3     | Total Fertility Rate                               | --              |
| Neonatal preterm birth                                   | Male   | 0-6 days  | 1-4 years | Global     | -1        | 1     | Health System Access (capped)                      | 640             |
| Neonatal preterm birth                                   | Male   | 0-6 days  | 1-4 years | Global     | 1         | 1     | Smoking Prevalence (Reproductive Age Standardized) | 33              |
| Neonatal preterm birth                                   | Male   | 0-6 days  | 1-4 years | Global     | 1         | 1     | Indoor Air Pollution (All Cooking Fuels)           | 66              |
| Neonatal preterm birth                                   | Male   | 0-6 days  | 1-4 years | Global     | -1        | 2     | Antenatal Care (4 visits) Coverage (proportion)    | 45              |
| Neonatal preterm birth                                   | Male   | 0-6 days  | 1-4 years | Global     | -1        | 2     | In-Facility Delivery (proportion)                  | 58              |
| Neonatal preterm birth                                   | Male   | 0-6 days  | 1-4 years | Global     | -1        | 2     | Healthcare access and quality index                | 121             |
| Neonatal preterm birth                                   | Male   | 0-6 days  | 1-4 years | Global     | -1        | 2     | Skilled Birth Attendance (proportion)              | 160             |
| Neonatal preterm birth                                   | Male   | 0-6 days  | 1-4 years | Global     | 1         | 2     | Age-standardized underweight (weight-for-age) SEV  | 254             |
| Neonatal preterm birth                                   | Male   | 0-6 days  | 1-4 years | Global     | 1         | 2     | Live Births 35+ (proportion)                       | 324             |
| Neonatal preterm birth                                   | Male   | 0-6 days  | 1-4 years | Global     | -1        | 3     | Education (years per capita)                       | 67              |
| Neonatal preterm birth                                   | Male   | 0-6 days  | 1-4 years | Global     | -1        | 3     | Socio-demographic Index                            | 102             |
| Neonatal preterm birth                                   | Male   | 0-6 days  | 1-4 years | Global     | -1        | 3     | LDI (IS per capita)                                | --              |
| Neonatal preterm birth                                   | Male   | 0-6 days  | 1-4 years | Global     | 1         | 3     | Total Fertility Rate                               | --              |
| Neonatal encephalopathy due to birth asphyxia and trauma | Female | 0-6 days  | 1-4 years | Data Rich  | 1         | 1     | Indoor Air Pollution (All Cooking Fuels)           | 326             |
| Neonatal encephalopathy due to birth asphyxia and trauma | Female | 0-6 days  | 1-4 years | Data Rich  | 1         | 1     | Smoking Prevalence (Reproductive Age Standardized) | 854             |
| Neonatal encephalopathy due to birth asphyxia and trauma | Female | 0-6 days  | 1-4 years | Data Rich  | -1        | 2     | Antenatal Care (4 visits) Coverage (proportion)    | 37              |
| Neonatal encephalopathy due to birth asphyxia and trauma | Female | 0-6 days  | 1-4 years | Data Rich  | -1        | 2     | In-Facility Delivery (proportion)                  | 78              |
| Neonatal encephalopathy due to birth asphyxia and trauma | Female | 0-6 days  | 1-4 years | Data Rich  | -1        | 2     | Health System Access (capped)                      | 117             |
| Neonatal encephalopathy due to birth asphyxia and trauma | Female | 0-6 days  | 1-4 years | Data Rich  | -1        | 2     | Healthcare access and quality index                | 239             |
| Neonatal encephalopathy due to birth asphyxia and trauma | Female | 0-6 days  | 1-4 years | Data Rich  | -1        | 2     | Skilled Birth Attendance (proportion)              | 256             |
| Neonatal encephalopathy due to birth asphyxia and trauma | Female | 0-6 days  | 1-4 years | Data Rich  | 1         | 2     | Age-standardized underweight (weight-for-age) SEV  | 368             |
| Neonatal encephalopathy due to birth asphyxia and trauma | Female | 0-6 days  | 1-4 years | Data Rich  | 1         | 2     | Live Births 35+ (proportion)                       | --              |
| Neonatal encephalopathy due to birth asphyxia and trauma | Female | 0-6 days  | 1-4 years | Data Rich  | -1        | 3     | Socio-demographic Index                            | 284             |
| Neonatal encephalopathy due to birth asphyxia and trauma | Female | 0-6 days  | 1-4 years | Data Rich  | -1        | 3     | Education (years per capita)                       | --              |
| Neonatal encephalopathy due to birth asphyxia and trauma | Female | 0-6 days  | 1-4 years | Data Rich  | -1        | 3     | LDI (IS per capita)                                | --              |
| Neonatal encephalopathy due to birth asphyxia and trauma | Female | 0-6 days  | 1-4 years | Data Rich  | 1         | 3     | Total Fertility Rate                               | --              |
| Neonatal encephalopathy due to birth asphyxia and trauma | Female | 0-6 days  | 1-4 years | Global     | 1         | 1     | Smoking Prevalence (Reproductive Age Standardized) | 384             |
| Neonatal encephalopathy due to birth asphyxia and trauma | Female | 0-6 days  | 1-4 years | Global     | 1         | 1     | Indoor Air Pollution (All Cooking Fuels)           | 412             |
| Neonatal encephalopathy due to birth asphyxia and trauma | Female | 0-6 days  | 1-4 years | Global     | -1        | 2     | Skilled Birth Attendance (proportion)              | 106             |
| Neonatal encephalopathy due to birth asphyxia and trauma | Female | 0-6 days  | 1-4 years | Global     | -1        | 2     | Antenatal Care (4 visits) Coverage (proportion)    | 112             |
| Neonatal encephalopathy due to birth asphyxia and trauma | Female | 0-6 days  | 1-4 years | Global     | -1        | 2     | In-Facility Delivery (proportion)                  | 160             |
| Neonatal encephalopathy due to birth asphyxia and trauma | Female | 0-6 days  | 1-4 years | Global     | -1        | 2     | Health System Access (capped)                      | 242             |
| Neonatal encephalopathy due to birth asphyxia and trauma | Female | 0-6 days  | 1-4 years | Global     | -1        | 2     | Healthcare access and quality index                | --              |
| Neonatal encephalopathy due to birth asphyxia and trauma | Female | 0-6 days  | 1-4 years | Global     | 1         | 2     | Age-standardized underweight (weight-for-age) SEV  | 262             |
| Neonatal encephalopathy due to birth asphyxia and trauma | Female | 0-6 days  | 1-4 years | Global     | 1         | 2     | Live Births 35+ (proportion)                       | 324             |
| Neonatal encephalopathy due to birth asphyxia and trauma | Female | 0-6 days  | 1-4 years | Global     | -1        | 3     | Socio-demographic Index                            | 115             |
| Neonatal encephalopathy due to birth asphyxia and trauma | Female | 0-6 days  | 1-4 years | Global     | -1        | 3     | Education (years per capita)                       | --              |
| Neonatal encephalopathy due to birth asphyxia and trauma | Female | 0-6 days  | 1-4 years | Global     | -1        | 3     | LDI (IS per capita)                                | --              |
| Neonatal encephalopathy due to birth asphyxia and trauma | Female | 0-6 days  | 1-4 years | Global     | 1         | 3     | Total Fertility Rate                               | --              |
| Neonatal encephalopathy due to birth asphyxia and trauma | Male   | 0-6 days  | 1-4 years | Data Rich  | 1         | 1     | Indoor Air Pollution (All Cooking Fuels)           | 364             |
| Neonatal encephalopathy due to birth asphyxia and trauma | Male   | 0-6 days  | 1-4 years | Data Rich  | 1         | 1     | Smoking Prevalence (Reproductive Age Standardized) | 550             |
| Neonatal encephalopathy due to birth asphyxia and trauma | Male   | 0-6 days  | 1-4 years | Data Rich  | -1        | 2     | Antenatal Care (4 visits) Coverage (proportion)    | 75              |
| Neonatal encephalopathy due to birth asphyxia and trauma | Male   | 0-6 days  | 1-4 years | Data Rich  | -1        | 2     | Skilled Birth Attendance (proportion)              | 103             |
| Neonatal encephalopathy due to birth asphyxia and trauma | Male   | 0-6 days  | 1-4 years | Data Rich  | -1        | 2     | In-Facility Delivery (proportion)                  | 152             |
| Neonatal encephalopathy due to birth asphyxia and trauma | Male   | 0-6 days  | 1-4 years | Data Rich  | -1        | 2     | Health System Access (capped)                      | 325             |

**Appendix Table 9: CODEm covariates used, level of covariate, and expected direction of covariate by cause, sex, and age**

*Covariates that CODEm did not select during the covariate selection process have no draw counts listed.*

| Cause                                                    | Sex    | Age Start | Age End   | Model Type | Direction | Level | Covariate Name                                     | Number of Draws |
|----------------------------------------------------------|--------|-----------|-----------|------------|-----------|-------|----------------------------------------------------|-----------------|
| Neonatal encephalopathy due to birth asphyxia and trauma | Male   | 0-6 days  | 1-4 years | Data Rich  | -1        | 2     | Healthcare access and quality index                | --              |
| Neonatal encephalopathy due to birth asphyxia and trauma | Male   | 0-6 days  | 1-4 years | Data Rich  | 1         | 2     | Age-standardized underweight (weight-for-age) SEV  | 265             |
| Neonatal encephalopathy due to birth asphyxia and trauma | Male   | 0-6 days  | 1-4 years | Data Rich  | 1         | 2     | Live Births 35+ (proportion)                       | --              |
| Neonatal encephalopathy due to birth asphyxia and trauma | Male   | 0-6 days  | 1-4 years | Data Rich  | -1        | 3     | Socio-demographic Index                            | 140             |
| Neonatal encephalopathy due to birth asphyxia and trauma | Male   | 0-6 days  | 1-4 years | Data Rich  | -1        | 3     | Education (years per capita)                       | 207             |
| Neonatal encephalopathy due to birth asphyxia and trauma | Male   | 0-6 days  | 1-4 years | Data Rich  | -1        | 3     | LDI (IS per capita)                                | --              |
| Neonatal encephalopathy due to birth asphyxia and trauma | Male   | 0-6 days  | 1-4 years | Data Rich  | 1         | 3     | Total Fertility Rate                               | --              |
| Neonatal encephalopathy due to birth asphyxia and trauma | Male   | 0-6 days  | 1-4 years | Global     | 1         | 1     | Indoor Air Pollution (All Cooking Fuels)           | 226             |
| Neonatal encephalopathy due to birth asphyxia and trauma | Male   | 0-6 days  | 1-4 years | Global     | 1         | 1     | Smoking Prevalence (Reproductive Age Standardized) | 558             |
| Neonatal encephalopathy due to birth asphyxia and trauma | Male   | 0-6 days  | 1-4 years | Global     | -1        | 2     | Antenatal Care (4 visits) Coverage (proportion)    | 12              |
| Neonatal encephalopathy due to birth asphyxia and trauma | Male   | 0-6 days  | 1-4 years | Global     | -1        | 2     | Skilled Birth Attendance (proportion)              | 74              |
| Neonatal encephalopathy due to birth asphyxia and trauma | Male   | 0-6 days  | 1-4 years | Global     | -1        | 2     | In-Facility Delivery (proportion)                  | 172             |
| Neonatal encephalopathy due to birth asphyxia and trauma | Male   | 0-6 days  | 1-4 years | Global     | -1        | 2     | Healthcare access and quality index                | 213             |
| Neonatal encephalopathy due to birth asphyxia and trauma | Male   | 0-6 days  | 1-4 years | Global     | -1        | 2     | Health System Access (capped)                      | 404             |
| Neonatal encephalopathy due to birth asphyxia and trauma | Male   | 0-6 days  | 1-4 years | Global     | 1         | 2     | Age-standardized underweight (weight-for-age) SEV  | 178             |
| Neonatal encephalopathy due to birth asphyxia and trauma | Male   | 0-6 days  | 1-4 years | Global     | 1         | 2     | Live Births 35+ (proportion)                       | --              |
| Neonatal encephalopathy due to birth asphyxia and trauma | Male   | 0-6 days  | 1-4 years | Global     | -1        | 3     | Socio-demographic Index                            | 164             |
| Neonatal encephalopathy due to birth asphyxia and trauma | Male   | 0-6 days  | 1-4 years | Global     | -1        | 3     | Education (years per capita)                       | --              |
| Neonatal encephalopathy due to birth asphyxia and trauma | Male   | 0-6 days  | 1-4 years | Global     | -1        | 3     | LDI (IS per capita)                                | --              |
| Neonatal encephalopathy due to birth asphyxia and trauma | Male   | 0-6 days  | 1-4 years | Global     | 1         | 3     | Total Fertility Rate                               | --              |
| Neonatal sepsis and other neonatal infections            | Female | 0-6 days  | 1-4 years | Data Rich  | 1         | 1     | Smoking Prevalence (Reproductive Age Standardized) | 953             |
| Neonatal sepsis and other neonatal infections            | Female | 0-6 days  | 1-4 years | Data Rich  | 1         | 1     | Indoor Air Pollution (All Cooking Fuels)           | --              |
| Neonatal sepsis and other neonatal infections            | Female | 0-6 days  | 1-4 years | Data Rich  | -1        | 2     | Healthcare access and quality index                | 127             |
| Neonatal sepsis and other neonatal infections            | Female | 0-6 days  | 1-4 years | Data Rich  | -1        | 2     | Antenatal Care (4 visits) Coverage (proportion)    | 187             |
| Neonatal sepsis and other neonatal infections            | Female | 0-6 days  | 1-4 years | Data Rich  | -1        | 2     | Health System Access (capped)                      | 187             |
| Neonatal sepsis and other neonatal infections            | Female | 0-6 days  | 1-4 years | Data Rich  | -1        | 2     | In-Facility Delivery (proportion)                  | --              |
| Neonatal sepsis and other neonatal infections            | Female | 0-6 days  | 1-4 years | Data Rich  | -1        | 2     | Skilled Birth Attendance (proportion)              | --              |
| Neonatal sepsis and other neonatal infections            | Female | 0-6 days  | 1-4 years | Data Rich  | 1         | 2     | Live Births 35+ (proportion)                       | 47              |
| Neonatal sepsis and other neonatal infections            | Female | 0-6 days  | 1-4 years | Data Rich  | 1         | 2     | Age-standardized underweight (weight-for-age) SEV  | --              |
| Neonatal sepsis and other neonatal infections            | Female | 0-6 days  | 1-4 years | Data Rich  | -1        | 3     | Education (years per capita)                       | 111             |
| Neonatal sepsis and other neonatal infections            | Female | 0-6 days  | 1-4 years | Data Rich  | -1        | 3     | Socio-demographic Index                            | 204             |
| Neonatal sepsis and other neonatal infections            | Female | 0-6 days  | 1-4 years | Data Rich  | -1        | 3     | LDI (IS per capita)                                | --              |
| Neonatal sepsis and other neonatal infections            | Female | 0-6 days  | 1-4 years | Data Rich  | 1         | 3     | Total Fertility Rate                               | --              |
| Neonatal sepsis and other neonatal infections            | Female | 0-6 days  | 1-4 years | Global     | 1         | 1     | Smoking Prevalence (Reproductive Age Standardized) | 920             |
| Neonatal sepsis and other neonatal infections            | Female | 0-6 days  | 1-4 years | Global     | 1         | 1     | Indoor Air Pollution (All Cooking Fuels)           | --              |
| Neonatal sepsis and other neonatal infections            | Female | 0-6 days  | 1-4 years | Global     | -1        | 2     | Antenatal Care (4 visits) Coverage (proportion)    | 38              |
| Neonatal sepsis and other neonatal infections            | Female | 0-6 days  | 1-4 years | Global     | -1        | 2     | Health System Access (capped)                      | 148             |
| Neonatal sepsis and other neonatal infections            | Female | 0-6 days  | 1-4 years | Global     | -1        | 2     | Healthcare access and quality index                | 269             |
| Neonatal sepsis and other neonatal infections            | Female | 0-6 days  | 1-4 years | Global     | -1        | 2     | In-Facility Delivery (proportion)                  | --              |
| Neonatal sepsis and other neonatal infections            | Female | 0-6 days  | 1-4 years | Global     | -1        | 2     | Skilled Birth Attendance (proportion)              | --              |
| Neonatal sepsis and other neonatal infections            | Female | 0-6 days  | 1-4 years | Global     | 1         | 2     | Live Births 35+ (proportion)                       | 80              |
| Neonatal sepsis and other neonatal infections            | Female | 0-6 days  | 1-4 years | Global     | 1         | 2     | Age-standardized underweight (weight-for-age) SEV  | --              |
| Neonatal sepsis and other neonatal infections            | Female | 0-6 days  | 1-4 years | Global     | -1        | 3     | Education (years per capita)                       | 129             |
| Neonatal sepsis and other neonatal infections            | Female | 0-6 days  | 1-4 years | Global     | -1        | 3     | Socio-demographic Index                            | 129             |
| Neonatal sepsis and other neonatal infections            | Female | 0-6 days  | 1-4 years | Global     | -1        | 3     | LDI (IS per capita)                                | --              |
| Neonatal sepsis and other neonatal infections            | Female | 0-6 days  | 1-4 years | Global     | 1         | 3     | Total Fertility Rate                               | --              |
| Neonatal sepsis and other neonatal infections            | Male   | 0-6 days  | 1-4 years | Data Rich  | 1         | 1     | Indoor Air Pollution (All Cooking Fuels)           | 89              |
| Neonatal sepsis and other neonatal infections            | Male   | 0-6 days  | 1-4 years | Data Rich  | 1         | 1     | Age-standardized underweight (weight-for-age) SEV  | 209             |
| Neonatal sepsis and other neonatal infections            | Male   | 0-6 days  | 1-4 years | Data Rich  | 1         | 1     | Smoking Prevalence (Reproductive Age Standardized) | 765             |
| Neonatal sepsis and other neonatal infections            | Male   | 0-6 days  | 1-4 years | Data Rich  | -1        | 2     | Skilled Birth Attendance (proportion)              | 24              |
| Neonatal sepsis and other neonatal infections            | Male   | 0-6 days  | 1-4 years | Data Rich  | -1        | 2     | Antenatal Care (4 visits) Coverage (proportion)    | 107             |
| Neonatal sepsis and other neonatal infections            | Male   | 0-6 days  | 1-4 years | Data Rich  | -1        | 2     | Healthcare access and quality index                | 324             |
| Neonatal sepsis and other neonatal infections            | Male   | 0-6 days  | 1-4 years | Data Rich  | -1        | 2     | Health System Access (capped)                      | 431             |
| Neonatal sepsis and other neonatal infections            | Male   | 0-6 days  | 1-4 years | Data Rich  | -1        | 2     | In-Facility Delivery (proportion)                  | --              |
| Neonatal sepsis and other neonatal infections            | Male   | 0-6 days  | 1-4 years | Data Rich  | 1         | 2     | Live Births 35+ (proportion)                       | 33              |
| Neonatal sepsis and other neonatal infections            | Male   | 0-6 days  | 1-4 years | Data Rich  | -1        | 3     | Socio-demographic Index                            | 118             |
| Neonatal sepsis and other neonatal infections            | Male   | 0-6 days  | 1-4 years | Data Rich  | -1        | 3     | Education (years per capita)                       | 202             |
| Neonatal sepsis and other neonatal infections            | Male   | 0-6 days  | 1-4 years | Data Rich  | -1        | 3     | LDI (IS per capita)                                | --              |
| Neonatal sepsis and other neonatal infections            | Male   | 0-6 days  | 1-4 years | Data Rich  | 1         | 3     | Total Fertility Rate                               | --              |
| Neonatal sepsis and other neonatal infections            | Male   | 0-6 days  | 1-4 years | Global     | 1         | 1     | Indoor Air Pollution (All Cooking Fuels)           | 62              |
| Neonatal sepsis and other neonatal infections            | Male   | 0-6 days  | 1-4 years | Global     | 1         | 1     | Smoking Prevalence (Reproductive Age Standardized) | 772             |
| Neonatal sepsis and other neonatal infections            | Male   | 0-6 days  | 1-4 years | Global     | -1        | 2     | Skilled Birth Attendance (proportion)              | 26              |
| Neonatal sepsis and other neonatal infections            | Male   | 0-6 days  | 1-4 years | Global     | -1        | 2     | In-Facility Delivery (proportion)                  | 32              |
| Neonatal sepsis and other neonatal infections            | Male   | 0-6 days  | 1-4 years | Global     | -1        | 2     | Antenatal Care (4 visits) Coverage (proportion)    | 39              |
| Neonatal sepsis and other neonatal infections            | Male   | 0-6 days  | 1-4 years | Global     | -1        | 2     | Healthcare access and quality index                | 440             |
| Neonatal sepsis and other neonatal infections            | Male   | 0-6 days  | 1-4 years | Global     | -1        | 2     | Health System Access (capped)                      | 479             |
| Neonatal sepsis and other neonatal infections            | Male   | 0-6 days  | 1-4 years | Global     | 1         | 2     | Age-standardized underweight (weight-for-age) SEV  | 55              |
| Neonatal sepsis and other neonatal infections            | Male   | 0-6 days  | 1-4 years | Global     | 1         | 2     | Live Births 35+ (proportion)                       | 190             |
| Neonatal sepsis and other neonatal infections            | Male   | 0-6 days  | 1-4 years | Global     | -1        | 3     | Socio-demographic Index                            | 249             |
| Neonatal sepsis and other neonatal infections            | Male   | 0-6 days  | 1-4 years | Global     | -1        | 3     | Education (years per capita)                       | 281             |
| Neonatal sepsis and other neonatal infections            | Male   | 0-6 days  | 1-4 years | Global     | -1        | 3     | LDI (IS per capita)                                | --              |
| Neonatal sepsis and other neonatal infections            | Male   | 0-6 days  | 1-4 years | Global     | 1         | 3     | Total Fertility Rate                               | --              |
| Hemolytic disease and other neonatal jaundice            | Female | 0-6 days  | 1-4 years | Data Rich  | 1         | 1     | Indoor Air Pollution (All Cooking Fuels)           | 332             |
| Hemolytic disease and other neonatal jaundice            | Female | 0-6 days  | 1-4 years | Data Rich  | 1         | 1     | Smoking Prevalence (Reproductive Age Standardized) | 737             |
| Hemolytic disease and other neonatal jaundice            | Female | 0-6 days  | 1-4 years | Data Rich  | -1        | 2     | Health System Access (capped)                      | 0               |
| Hemolytic disease and other neonatal jaundice            | Female | 0-6 days  | 1-4 years | Data Rich  | -1        | 2     | Antenatal Care (4 visits) Coverage (proportion)    | 84              |
| Hemolytic disease and other neonatal jaundice            | Female | 0-6 days  | 1-4 years | Data Rich  | -1        | 2     | Healthcare access and quality index                | 141             |
| Hemolytic disease and other neonatal jaundice            | Female | 0-6 days  | 1-4 years | Data Rich  | -1        | 2     | Skilled Birth Attendance (proportion)              | 174             |



**Appendix Table 9: CODEm covariates used, level of covariate, and expected direction of covariate by cause, sex, and age**

*Covariates that CODEm did not select during the covariate selection process have no draw counts listed.*

| Cause                                         | Sex    | Age Start | Age End   | Model Type | Direction | Level | Covariate Name                                     | Number of Draws |
|-----------------------------------------------|--------|-----------|-----------|------------|-----------|-------|----------------------------------------------------|-----------------|
| Hemolytic disease and other neonatal jaundice | Female | 0-6 days  | 1-4 years | Data Rich  | -1        | 2     | In-Facility Delivery (proportion)                  | 446             |
| Hemolytic disease and other neonatal jaundice | Female | 0-6 days  | 1-4 years | Data Rich  | 1         | 2     | Age-standardized underweight (weight-for-age) SEV  | 5               |
| Hemolytic disease and other neonatal jaundice | Female | 0-6 days  | 1-4 years | Data Rich  | 1         | 2     | Live Births 35+ (proportion)                       | --              |
| Hemolytic disease and other neonatal jaundice | Female | 0-6 days  | 1-4 years | Data Rich  | -1        | 3     | Education (years per capita)                       | 187             |
| Hemolytic disease and other neonatal jaundice | Female | 0-6 days  | 1-4 years | Data Rich  | -1        | 3     | Socio-demographic Index                            | 338             |
| Hemolytic disease and other neonatal jaundice | Female | 0-6 days  | 1-4 years | Data Rich  | -1        | 3     | LDI (IS per capita)                                | --              |
| Hemolytic disease and other neonatal jaundice | Female | 0-6 days  | 1-4 years | Data Rich  | 1         | 3     | Total Fertility Rate                               | --              |
| Hemolytic disease and other neonatal jaundice | Female | 0-6 days  | 1-4 years | Global     | 1         | 1     | Age-standardized underweight (weight-for-age) SEV  | 16              |
| Hemolytic disease and other neonatal jaundice | Female | 0-6 days  | 1-4 years | Global     | 1         | 1     | Indoor Air Pollution (All Cooking Fuels)           | 269             |
| Hemolytic disease and other neonatal jaundice | Female | 0-6 days  | 1-4 years | Global     | 1         | 1     | Smoking Prevalence (Reproductive Age Standardized) | 911             |
| Hemolytic disease and other neonatal jaundice | Female | 0-6 days  | 1-4 years | Global     | -1        | 2     | Health System Access (capped)                      | 0               |
| Hemolytic disease and other neonatal jaundice | Female | 0-6 days  | 1-4 years | Global     | -1        | 2     | Antenatal Care (4 visits) Coverage (proportion)    | 39              |
| Hemolytic disease and other neonatal jaundice | Female | 0-6 days  | 1-4 years | Global     | -1        | 2     | Skilled Birth Attendance (proportion)              | 68              |
| Hemolytic disease and other neonatal jaundice | Female | 0-6 days  | 1-4 years | Global     | -1        | 2     | Healthcare access and quality index                | 115             |
| Hemolytic disease and other neonatal jaundice | Female | 0-6 days  | 1-4 years | Global     | -1        | 2     | In-Facility Delivery (proportion)                  | 741             |
| Hemolytic disease and other neonatal jaundice | Female | 0-6 days  | 1-4 years | Global     | 1         | 2     | Live Births 35+ (proportion)                       | --              |
| Hemolytic disease and other neonatal jaundice | Female | 0-6 days  | 1-4 years | Global     | -1        | 3     | Education (years per capita)                       | 5               |
| Hemolytic disease and other neonatal jaundice | Female | 0-6 days  | 1-4 years | Global     | -1        | 3     | Socio-demographic Index                            | 279             |
| Hemolytic disease and other neonatal jaundice | Female | 0-6 days  | 1-4 years | Global     | -1        | 3     | LDI (IS per capita)                                | --              |
| Hemolytic disease and other neonatal jaundice | Female | 0-6 days  | 1-4 years | Global     | 1         | 3     | Total Fertility Rate                               | --              |
| Hemolytic disease and other neonatal jaundice | Male   | 0-6 days  | 1-4 years | Data Rich  | 1         | 1     | Indoor Air Pollution (All Cooking Fuels)           | 354             |
| Hemolytic disease and other neonatal jaundice | Male   | 0-6 days  | 1-4 years | Data Rich  | 1         | 1     | Smoking Prevalence (Reproductive Age Standardized) | 854             |
| Hemolytic disease and other neonatal jaundice | Male   | 0-6 days  | 1-4 years | Data Rich  | -1        | 2     | Skilled Birth Attendance (proportion)              | 5               |
| Hemolytic disease and other neonatal jaundice | Male   | 0-6 days  | 1-4 years | Data Rich  | -1        | 2     | Antenatal Care (4 visits) Coverage (proportion)    | 89              |
| Hemolytic disease and other neonatal jaundice | Male   | 0-6 days  | 1-4 years | Data Rich  | -1        | 2     | In-Facility Delivery (proportion)                  | 156             |
| Hemolytic disease and other neonatal jaundice | Male   | 0-6 days  | 1-4 years | Data Rich  | -1        | 2     | Healthcare access and quality index                | 242             |
| Hemolytic disease and other neonatal jaundice | Male   | 0-6 days  | 1-4 years | Data Rich  | -1        | 2     | Health System Access (capped)                      | 278             |
| Hemolytic disease and other neonatal jaundice | Male   | 0-6 days  | 1-4 years | Data Rich  | 1         | 2     | Age-standardized underweight (weight-for-age) SEV  | 172             |
| Hemolytic disease and other neonatal jaundice | Male   | 0-6 days  | 1-4 years | Data Rich  | 1         | 2     | Live Births 35+ (proportion)                       | --              |
| Hemolytic disease and other neonatal jaundice | Male   | 0-6 days  | 1-4 years | Data Rich  | -1        | 3     | Education (years per capita)                       | 218             |
| Hemolytic disease and other neonatal jaundice | Male   | 0-6 days  | 1-4 years | Data Rich  | -1        | 3     | Socio-demographic Index                            | 350             |
| Hemolytic disease and other neonatal jaundice | Male   | 0-6 days  | 1-4 years | Data Rich  | -1        | 3     | LDI (IS per capita)                                | --              |
| Hemolytic disease and other neonatal jaundice | Male   | 0-6 days  | 1-4 years | Data Rich  | 1         | 3     | Total Fertility Rate                               | --              |
| Hemolytic disease and other neonatal jaundice | Male   | 0-6 days  | 1-4 years | Global     | 1         | 1     | Indoor Air Pollution (All Cooking Fuels)           | 419             |
| Hemolytic disease and other neonatal jaundice | Male   | 0-6 days  | 1-4 years | Global     | 1         | 1     | Smoking Prevalence (Reproductive Age Standardized) | 791             |
| Hemolytic disease and other neonatal jaundice | Male   | 0-6 days  | 1-4 years | Global     | -1        | 2     | In-Facility Delivery (proportion)                  | 82              |
| Hemolytic disease and other neonatal jaundice | Male   | 0-6 days  | 1-4 years | Global     | -1        | 2     | Healthcare access and quality index                | 121             |
| Hemolytic disease and other neonatal jaundice | Male   | 0-6 days  | 1-4 years | Global     | -1        | 2     | Skilled Birth Attendance (proportion)              | 143             |
| Hemolytic disease and other neonatal jaundice | Male   | 0-6 days  | 1-4 years | Global     | -1        | 2     | Antenatal Care (4 visits) Coverage (proportion)    | 241             |
| Hemolytic disease and other neonatal jaundice | Male   | 0-6 days  | 1-4 years | Global     | -1        | 2     | Health System Access (capped)                      | 412             |
| Hemolytic disease and other neonatal jaundice | Male   | 0-6 days  | 1-4 years | Global     | 1         | 2     | Age-standardized underweight (weight-for-age) SEV  | 25              |
| Hemolytic disease and other neonatal jaundice | Male   | 0-6 days  | 1-4 years | Global     | 1         | 2     | Live Births 35+ (proportion)                       | --              |
| Hemolytic disease and other neonatal jaundice | Male   | 0-6 days  | 1-4 years | Global     | -1        | 3     | Socio-demographic Index                            | 142             |
| Hemolytic disease and other neonatal jaundice | Male   | 0-6 days  | 1-4 years | Global     | -1        | 3     | Education (years per capita)                       | 194             |
| Hemolytic disease and other neonatal jaundice | Male   | 0-6 days  | 1-4 years | Global     | -1        | 3     | LDI (IS per capita)                                | --              |
| Hemolytic disease and other neonatal jaundice | Male   | 0-6 days  | 1-4 years | Global     | 1         | 3     | Total Fertility Rate                               | --              |
| Other neonatal disorders                      | Female | 0-6 days  | 1-4 years | Data Rich  | 1         | 1     | Indoor Air Pollution (All Cooking Fuels)           | 484             |
| Other neonatal disorders                      | Female | 0-6 days  | 1-4 years | Data Rich  | 1         | 1     | Smoking Prevalence (Reproductive Age Standardized) | 679             |
| Other neonatal disorders                      | Female | 0-6 days  | 1-4 years | Data Rich  | -1        | 2     | Skilled Birth Attendance (proportion)              | 49              |
| Other neonatal disorders                      | Female | 0-6 days  | 1-4 years | Data Rich  | -1        | 2     | In-Facility Delivery (proportion)                  | 50              |
| Other neonatal disorders                      | Female | 0-6 days  | 1-4 years | Data Rich  | -1        | 2     | Health System Access (capped)                      | 127             |
| Other neonatal disorders                      | Female | 0-6 days  | 1-4 years | Data Rich  | -1        | 2     | Antenatal Care (4 visits) Coverage (proportion)    | 268             |
| Other neonatal disorders                      | Female | 0-6 days  | 1-4 years | Data Rich  | -1        | 2     | Healthcare access and quality index                | 550             |
| Other neonatal disorders                      | Female | 0-6 days  | 1-4 years | Data Rich  | 1         | 2     | Age-standardized underweight (weight-for-age) SEV  | 1               |
| Other neonatal disorders                      | Female | 0-6 days  | 1-4 years | Data Rich  | 1         | 2     | Live Births 35+ (proportion)                       | 186             |
| Other neonatal disorders                      | Female | 0-6 days  | 1-4 years | Data Rich  | -1        | 3     | Socio-demographic Index                            | 67              |
| Other neonatal disorders                      | Female | 0-6 days  | 1-4 years | Data Rich  | -1        | 3     | Education (years per capita)                       | 164             |
| Other neonatal disorders                      | Female | 0-6 days  | 1-4 years | Data Rich  | -1        | 3     | LDI (IS per capita)                                | --              |
| Other neonatal disorders                      | Female | 0-6 days  | 1-4 years | Data Rich  | 1         | 3     | Total Fertility Rate                               | --              |
| Other neonatal disorders                      | Female | 0-6 days  | 1-4 years | Global     | 1         | 1     | Indoor Air Pollution (All Cooking Fuels)           | 320             |
| Other neonatal disorders                      | Female | 0-6 days  | 1-4 years | Global     | 1         | 1     | Smoking Prevalence (Reproductive Age Standardized) | 490             |
| Other neonatal disorders                      | Female | 0-6 days  | 1-4 years | Global     | -1        | 2     | Skilled Birth Attendance (proportion)              | 165             |
| Other neonatal disorders                      | Female | 0-6 days  | 1-4 years | Global     | -1        | 2     | In-Facility Delivery (proportion)                  | 376             |
| Other neonatal disorders                      | Female | 0-6 days  | 1-4 years | Global     | -1        | 2     | Antenatal Care (4 visits) Coverage (proportion)    | 464             |
| Other neonatal disorders                      | Female | 0-6 days  | 1-4 years | Global     | -1        | 2     | Health System Access (capped)                      | 680             |
| Other neonatal disorders                      | Female | 0-6 days  | 1-4 years | Global     | -1        | 2     | Healthcare access and quality index                | --              |
| Other neonatal disorders                      | Female | 0-6 days  | 1-4 years | Global     | 1         | 2     | Live Births 35+ (proportion)                       | 190             |
| Other neonatal disorders                      | Female | 0-6 days  | 1-4 years | Global     | 1         | 2     | Age-standardized underweight (weight-for-age) SEV  | 355             |
| Other neonatal disorders                      | Female | 0-6 days  | 1-4 years | Global     | -1        | 3     | Education (years per capita)                       | 74              |
| Other neonatal disorders                      | Female | 0-6 days  | 1-4 years | Global     | -1        | 3     | Socio-demographic Index                            | 79              |
| Other neonatal disorders                      | Female | 0-6 days  | 1-4 years | Global     | -1        | 3     | LDI (IS per capita)                                | --              |
| Other neonatal disorders                      | Female | 0-6 days  | 1-4 years | Global     | 1         | 3     | Total Fertility Rate                               | --              |
| Other neonatal disorders                      | Male   | 0-6 days  | 1-4 years | Data Rich  | 1         | 1     | Indoor Air Pollution (All Cooking Fuels)           | 451             |
| Other neonatal disorders                      | Male   | 0-6 days  | 1-4 years | Data Rich  | 1         | 1     | Smoking Prevalence (Reproductive Age Standardized) | 719             |
| Other neonatal disorders                      | Male   | 0-6 days  | 1-4 years | Data Rich  | -1        | 2     | Antenatal Care (4 visits) Coverage (proportion)    | 51              |
| Other neonatal disorders                      | Male   | 0-6 days  | 1-4 years | Data Rich  | -1        | 2     | Health System Access (capped)                      | 313             |
| Other neonatal disorders                      | Male   | 0-6 days  | 1-4 years | Data Rich  | -1        | 2     | In-Facility Delivery (proportion)                  | 321             |
| Other neonatal disorders                      | Male   | 0-6 days  | 1-4 years | Data Rich  | -1        | 2     | Skilled Birth Attendance (proportion)              | 359             |

**Appendix Table 9: CODEm covariates used, level of covariate, and expected direction of covariate by cause, sex, and age**

*Covariates that CODEm did not select during the covariate selection process have no draw counts listed.*

| Cause                    | Sex    | Age Start   | Age End   | Model Type | Direction | Level | Covariate Name                                         | Number of Draws |
|--------------------------|--------|-------------|-----------|------------|-----------|-------|--------------------------------------------------------|-----------------|
| Other neonatal disorders | Male   | 0-6 days    | 1-4 years | Data Rich  | -1        | 2     | Healthcare access and quality index                    | --              |
| Other neonatal disorders | Male   | 0-6 days    | 1-4 years | Data Rich  | 1         | 2     | Live Births 35+ (proportion)                           | 188             |
| Other neonatal disorders | Male   | 0-6 days    | 1-4 years | Data Rich  | 1         | 2     | Age-standardized underweight (weight-for-age) SEV      | 225             |
| Other neonatal disorders | Male   | 0-6 days    | 1-4 years | Data Rich  | -1        | 3     | Education (years per capita)                           | --              |
| Other neonatal disorders | Male   | 0-6 days    | 1-4 years | Data Rich  | -1        | 3     | LDI (IS per capita)                                    | --              |
| Other neonatal disorders | Male   | 0-6 days    | 1-4 years | Data Rich  | -1        | 3     | Socio-demographic Index                                | --              |
| Other neonatal disorders | Male   | 0-6 days    | 1-4 years | Data Rich  | 1         | 3     | Total Fertility Rate                                   | --              |
| Other neonatal disorders | Male   | 0-6 days    | 1-4 years | Global     | 1         | 1     | Smoking Prevalence (Reproductive Age Standardized)     | 234             |
| Other neonatal disorders | Male   | 0-6 days    | 1-4 years | Global     | 1         | 1     | Indoor Air Pollution (All Cooking Fuels)               | 807             |
| Other neonatal disorders | Male   | 0-6 days    | 1-4 years | Global     | -1        | 2     | Antenatal Care (4 visits) Coverage (proportion)        | 173             |
| Other neonatal disorders | Male   | 0-6 days    | 1-4 years | Global     | -1        | 2     | Skilled Birth Attendance (proportion)                  | 228             |
| Other neonatal disorders | Male   | 0-6 days    | 1-4 years | Global     | -1        | 2     | In-Facility Delivery (proportion)                      | 230             |
| Other neonatal disorders | Male   | 0-6 days    | 1-4 years | Global     | -1        | 2     | Health System Access (capped)                          | 346             |
| Other neonatal disorders | Male   | 0-6 days    | 1-4 years | Global     | -1        | 2     | Healthcare access and quality index                    | --              |
| Other neonatal disorders | Male   | 0-6 days    | 1-4 years | Global     | 1         | 2     | Age-standardized underweight (weight-for-age) SEV      | 182             |
| Other neonatal disorders | Male   | 0-6 days    | 1-4 years | Global     | 1         | 2     | Live Births 35+ (proportion)                           | 193             |
| Other neonatal disorders | Male   | 0-6 days    | 1-4 years | Global     | -1        | 3     | Education (years per capita)                           | --              |
| Other neonatal disorders | Male   | 0-6 days    | 1-4 years | Global     | -1        | 3     | LDI (IS per capita)                                    | --              |
| Other neonatal disorders | Male   | 0-6 days    | 1-4 years | Global     | -1        | 3     | Socio-demographic Index                                | --              |
| Other neonatal disorders | Male   | 0-6 days    | 1-4 years | Global     | 1         | 3     | Total Fertility Rate                                   | --              |
| Nutritional deficiencies | Female | 28-364 days | 95+ years | Data Rich  | -1        | 1     | Proportion of households using iodized salt (adjusted) | 0               |
| Nutritional deficiencies | Female | 28-364 days | 95+ years | Data Rich  | -1        | 1     | energy unadjusted(kcal)                                | 0               |
| Nutritional deficiencies | Female | 28-364 days | 95+ years | Data Rich  | 1         | 1     | Age-Standardize Prevalence of Severe Anemia            | 0               |
| Nutritional deficiencies | Female | 28-364 days | 95+ years | Data Rich  | 1         | 1     | Age-standardized wasting (weight-for-height) SEV       | 205             |
| Nutritional deficiencies | Female | 28-364 days | 95+ years | Data Rich  | 1         | 1     | Underweight, age and sex specific                      | 358             |
| Nutritional deficiencies | Female | 28-364 days | 95+ years | Data Rich  | 1         | 1     | Age-standardized underweight (weight-for-age) SEV      | 795             |
| Nutritional deficiencies | Female | 28-364 days | 95+ years | Data Rich  | -1        | 2     | Health System Access (capped)                          | 0               |
| Nutritional deficiencies | Female | 28-364 days | 95+ years | Data Rich  | -1        | 2     | Healthcare access and quality index                    | 0               |
| Nutritional deficiencies | Female | 28-364 days | 95+ years | Data Rich  | 0         | 2     | Rainfall Quintile 2 (proportion)                       | 49              |
| Nutritional deficiencies | Female | 28-364 days | 95+ years | Data Rich  | 0         | 2     | Rainfall Quintile 1 (proportion)                       | 74              |
| Nutritional deficiencies | Female | 28-364 days | 95+ years | Data Rich  | 1         | 2     | Log-transformed SEV scalar: Diarrhea                   | 0               |
| Nutritional deficiencies | Female | 28-364 days | 95+ years | Data Rich  | 1         | 2     | SEV unsafe water                                       | 17              |
| Nutritional deficiencies | Female | 28-364 days | 95+ years | Data Rich  | 1         | 2     | SEV unsafe sanitation                                  | 27              |
| Nutritional deficiencies | Female | 28-364 days | 95+ years | Data Rich  | 1         | 2     | Alcohol SEV, age and sex specific                      | 79              |
| Nutritional deficiencies | Female | 28-364 days | 95+ years | Data Rich  | 1         | 2     | Mortality Rate Due to War Shocks (per 1 person)        | --              |
| Nutritional deficiencies | Female | 28-364 days | 95+ years | Data Rich  | -1        | 3     | Maternal Education (years per capita)                  | 0               |
| Nutritional deficiencies | Female | 28-364 days | 95+ years | Data Rich  | -1        | 3     | Education (years per capita)                           | 167             |
| Nutritional deficiencies | Female | 28-364 days | 95+ years | Data Rich  | -1        | 3     | Socio-demographic Index                                | 269             |
| Nutritional deficiencies | Female | 28-364 days | 95+ years | Data Rich  | -1        | 3     | LDI (IS per capita)                                    | --              |
| Nutritional deficiencies | Female | 28-364 days | 95+ years | Global     | -1        | 1     | energy unadjusted(kcal)                                | 73              |
| Nutritional deficiencies | Female | 28-364 days | 95+ years | Global     | -1        | 1     | Proportion of households using iodized salt (adjusted) | 511             |
| Nutritional deficiencies | Female | 28-364 days | 95+ years | Global     | 1         | 1     | Age-standardized underweight (weight-for-age) SEV      | 15              |
| Nutritional deficiencies | Female | 28-364 days | 95+ years | Global     | 1         | 1     | Age-Standardize Prevalence of Severe Anemia            | 60              |
| Nutritional deficiencies | Female | 28-364 days | 95+ years | Global     | 1         | 1     | Age-standardized wasting (weight-for-height) SEV       | 322             |
| Nutritional deficiencies | Female | 28-364 days | 95+ years | Global     | 1         | 1     | Underweight, age and sex specific                      | 949             |
| Nutritional deficiencies | Female | 28-364 days | 95+ years | Global     | -1        | 2     | Health System Access (capped)                          | 0               |
| Nutritional deficiencies | Female | 28-364 days | 95+ years | Global     | -1        | 2     | Healthcare access and quality index                    | 7               |
| Nutritional deficiencies | Female | 28-364 days | 95+ years | Global     | 0         | 2     | Rainfall Quintile 1 (proportion)                       | 70              |
| Nutritional deficiencies | Female | 28-364 days | 95+ years | Global     | 0         | 2     | Rainfall Quintile 2 (proportion)                       | 399             |
| Nutritional deficiencies | Female | 28-364 days | 95+ years | Global     | 1         | 2     | Log-transformed SEV scalar: Diarrhea                   | 6               |
| Nutritional deficiencies | Female | 28-364 days | 95+ years | Global     | 1         | 2     | SEV unsafe sanitation                                  | 388             |
| Nutritional deficiencies | Female | 28-364 days | 95+ years | Global     | 1         | 2     | SEV unsafe water                                       | 388             |
| Nutritional deficiencies | Female | 28-364 days | 95+ years | Global     | 1         | 2     | Alcohol SEV, age and sex specific                      | 598             |
| Nutritional deficiencies | Female | 28-364 days | 95+ years | Global     | 1         | 2     | Mortality Rate Due to War Shocks (per 1 person)        | --              |
| Nutritional deficiencies | Female | 28-364 days | 95+ years | Global     | -1        | 3     | Socio-demographic Index                                | 2               |
| Nutritional deficiencies | Female | 28-364 days | 95+ years | Global     | -1        | 3     | Education (years per capita)                           | 158             |
| Nutritional deficiencies | Female | 28-364 days | 95+ years | Global     | -1        | 3     | LDI (IS per capita)                                    | --              |
| Nutritional deficiencies | Male   | 28-364 days | 95+ years | Data Rich  | -1        | 1     | Proportion of households using iodized salt (adjusted) | 3               |
| Nutritional deficiencies | Male   | 28-364 days | 95+ years | Data Rich  | -1        | 1     | energy unadjusted(kcal)                                | 138             |
| Nutritional deficiencies | Male   | 28-364 days | 95+ years | Data Rich  | 1         | 1     | Age-standardized wasting (weight-for-height) SEV       | 197             |
| Nutritional deficiencies | Male   | 28-364 days | 95+ years | Data Rich  | 1         | 1     | Age-Standardize Prevalence of Severe Anemia            | 350             |
| Nutritional deficiencies | Male   | 28-364 days | 95+ years | Data Rich  | 1         | 1     | Age-standardized underweight (weight-for-age) SEV      | 724             |
| Nutritional deficiencies | Male   | 28-364 days | 95+ years | Data Rich  | 1         | 1     | Underweight, age and sex specific                      | 920             |
| Nutritional deficiencies | Male   | 28-364 days | 95+ years | Data Rich  | -1        | 2     | Healthcare access and quality index                    | 0               |
| Nutritional deficiencies | Male   | 28-364 days | 95+ years | Data Rich  | -1        | 2     | Sanitation (proportion with access)                    | 0               |
| Nutritional deficiencies | Male   | 28-364 days | 95+ years | Data Rich  | -1        | 2     | Health System Access (capped)                          | 11              |
| Nutritional deficiencies | Male   | 28-364 days | 95+ years | Data Rich  | -1        | 2     | Improved Water Source (proportion with access)         | 12              |
| Nutritional deficiencies | Male   | 28-364 days | 95+ years | Data Rich  | 0         | 2     | Rainfall Quintile 2 (proportion)                       | 34              |
| Nutritional deficiencies | Male   | 28-364 days | 95+ years | Data Rich  | 0         | 2     | Rainfall Quintile 1 (proportion)                       | 285             |
| Nutritional deficiencies | Male   | 28-364 days | 95+ years | Data Rich  | 1         | 2     | Alcohol SEV, age and sex specific                      | 0               |
| Nutritional deficiencies | Male   | 28-364 days | 95+ years | Data Rich  | 1         | 2     | Mortality Rate Due to War Shocks (per 1 person)        | --              |
| Nutritional deficiencies | Male   | 28-364 days | 95+ years | Data Rich  | -1        | 3     | Education (years per capita)                           | 0               |
| Nutritional deficiencies | Male   | 28-364 days | 95+ years | Data Rich  | -1        | 3     | Socio-demographic Index                                | 4               |
| Nutritional deficiencies | Male   | 28-364 days | 95+ years | Data Rich  | -1        | 3     | Maternal Education (years per capita)                  | 27              |
| Nutritional deficiencies | Male   | 28-364 days | 95+ years | Data Rich  | -1        | 3     | LDI (IS per capita)                                    | --              |
| Nutritional deficiencies | Male   | 28-364 days | 95+ years | Global     | -1        | 1     | Proportion of households using iodized salt (adjusted) | 0               |
| Nutritional deficiencies | Male   | 28-364 days | 95+ years | Global     | -1        | 1     | energy unadjusted(kcal)                                | 16              |
| Nutritional deficiencies | Male   | 28-364 days | 95+ years | Global     | 1         | 1     | Age-standardized wasting (weight-for-height) SEV       | 105             |

**Appendix Table 9: CODEm covariates used, level of covariate, and expected direction of covariate by cause, sex, and age**

*Covariates that CODEm did not select during the covariate selection process have no draw counts listed.*

| Cause                       | Sex    | Age Start   | Age End   | Model Type | Direction | Level | Covariate Name                                        | Number of Draws |
|-----------------------------|--------|-------------|-----------|------------|-----------|-------|-------------------------------------------------------|-----------------|
| Nutritional deficiencies    | Male   | 28-364 days | 95+ years | Global     | 1         | 1     | Age-Standardize Prevalence of Severe Anemia           | 212             |
| Nutritional deficiencies    | Male   | 28-364 days | 95+ years | Global     | 1         | 1     | Underweight, age and sex specific                     | 467             |
| Nutritional deficiencies    | Male   | 28-364 days | 95+ years | Global     | 1         | 1     | Age-standardized underweight (weight-for-age) SEV     | 828             |
| Nutritional deficiencies    | Male   | 28-364 days | 95+ years | Global     | -1        | 2     | Health System Access (capped)                         | 0               |
| Nutritional deficiencies    | Male   | 28-364 days | 95+ years | Global     | -1        | 2     | Healthcare access and quality index                   | 174             |
| Nutritional deficiencies    | Male   | 28-364 days | 95+ years | Global     | 0         | 2     | Rainfall Quintile 1 (proportion)                      | 177             |
| Nutritional deficiencies    | Male   | 28-364 days | 95+ years | Global     | 0         | 2     | Rainfall Quintile 2 (proportion)                      | 215             |
| Nutritional deficiencies    | Male   | 28-364 days | 95+ years | Global     | 1         | 2     | Alcohol SEV, age and sex specific                     | 0               |
| Nutritional deficiencies    | Male   | 28-364 days | 95+ years | Global     | 1         | 2     | Log-transformed SEV scalar: Diarrhea                  | 14              |
| Nutritional deficiencies    | Male   | 28-364 days | 95+ years | Global     | 1         | 2     | SEV unsafe water                                      | 101             |
| Nutritional deficiencies    | Male   | 28-364 days | 95+ years | Global     | 1         | 2     | SEV unsafe sanitation                                 | 189             |
| Nutritional deficiencies    | Male   | 28-364 days | 95+ years | Global     | 1         | 2     | Mortality Rate Due to War Shocks (per 1 person)       | --              |
| Nutritional deficiencies    | Male   | 28-364 days | 95+ years | Global     | -1        | 3     | Education (years per capita)                          | 3               |
| Nutritional deficiencies    | Male   | 28-364 days | 95+ years | Global     | -1        | 3     | Socio-demographic Index                               | 114             |
| Nutritional deficiencies    | Male   | 28-364 days | 95+ years | Global     | -1        | 3     | Maternal Education (years per capita)                 | 147             |
| Nutritional deficiencies    | Male   | 28-364 days | 95+ years | Global     | -1        | 3     | LDI (IS per capita)                                   | --              |
| Protein-energy malnutrition | Female | 28-364 days | 1-4 years | Data Rich  | -1        | 1     | energy unadjusted(kcal)                               | --              |
| Protein-energy malnutrition | Female | 28-364 days | 1-4 years | Data Rich  | 1         | 1     | Age-Standardize Prevalence of Severe Anemia           | 342             |
| Protein-energy malnutrition | Female | 28-364 days | 1-4 years | Data Rich  | 1         | 1     | Underweight, age and sex specific                     | 502             |
| Protein-energy malnutrition | Female | 28-364 days | 1-4 years | Data Rich  | 1         | 1     | Age- and sex-specific wasting (weight-for-height) SEV | 534             |
| Protein-energy malnutrition | Female | 28-364 days | 1-4 years | Data Rich  | 1         | 1     | Malnutrition Shock mortality rate                     | --              |
| Protein-energy malnutrition | Female | 28-364 days | 1-4 years | Data Rich  | -1        | 2     | Health System Access (capped)                         | 0               |
| Protein-energy malnutrition | Female | 28-364 days | 1-4 years | Data Rich  | -1        | 2     | Healthcare access and quality index                   | 115             |
| Protein-energy malnutrition | Female | 28-364 days | 1-4 years | Data Rich  | 0         | 2     | Rainfall Quintile 1 (proportion)                      | 0               |
| Protein-energy malnutrition | Female | 28-364 days | 1-4 years | Data Rich  | 0         | 2     | Rainfall Quintile 2 (proportion)                      | 365             |
| Protein-energy malnutrition | Female | 28-364 days | 1-4 years | Data Rich  | 1         | 2     | Log-transformed SEV scalar: Diarrhea                  | 115             |
| Protein-energy malnutrition | Female | 28-364 days | 1-4 years | Data Rich  | 1         | 2     | SEV unsafe sanitation                                 | 115             |
| Protein-energy malnutrition | Female | 28-364 days | 1-4 years | Data Rich  | 1         | 2     | SEV unsafe water                                      | 115             |
| Protein-energy malnutrition | Female | 28-364 days | 1-4 years | Data Rich  | 1         | 2     | Alcohol SEV, age and sex specific                     | --              |
| Protein-energy malnutrition | Female | 28-364 days | 1-4 years | Data Rich  | 1         | 2     | Mortality Rate Due to War Shocks (per 1 person)       | --              |
| Protein-energy malnutrition | Female | 28-364 days | 1-4 years | Data Rich  | -1        | 3     | Antenatal Care (4 visits) Coverage (proportion)       | 76              |
| Protein-energy malnutrition | Female | 28-364 days | 1-4 years | Data Rich  | -1        | 3     | Socio-demographic Index                               | 179             |
| Protein-energy malnutrition | Female | 28-364 days | 1-4 years | Data Rich  | -1        | 3     | Education (years per capita)                          | 212             |
| Protein-energy malnutrition | Female | 28-364 days | 1-4 years | Data Rich  | -1        | 3     | LDI (IS per capita)                                   | --              |
| Protein-energy malnutrition | Female | 28-364 days | 1-4 years | Global     | -1        | 1     | energy unadjusted(kcal)                               | --              |
| Protein-energy malnutrition | Female | 28-364 days | 1-4 years | Global     | 1         | 1     | Age-Standardize Prevalence of Severe Anemia           | 320             |
| Protein-energy malnutrition | Female | 28-364 days | 1-4 years | Global     | 1         | 1     | Age- and sex-specific wasting (weight-for-height) SEV | 482             |
| Protein-energy malnutrition | Female | 28-364 days | 1-4 years | Global     | 1         | 1     | Underweight, age and sex specific                     | 576             |
| Protein-energy malnutrition | Female | 28-364 days | 1-4 years | Global     | 1         | 1     | Malnutrition Shock mortality rate                     | --              |
| Protein-energy malnutrition | Female | 28-364 days | 1-4 years | Global     | -1        | 2     | Health System Access (capped)                         | 0               |
| Protein-energy malnutrition | Female | 28-364 days | 1-4 years | Global     | -1        | 2     | Healthcare access and quality index                   | 0               |
| Protein-energy malnutrition | Female | 28-364 days | 1-4 years | Global     | 0         | 2     | Rainfall Quintile 1 (proportion)                      | 178             |
| Protein-energy malnutrition | Female | 28-364 days | 1-4 years | Global     | 0         | 2     | Rainfall Quintile 2 (proportion)                      | 179             |
| Protein-energy malnutrition | Female | 28-364 days | 1-4 years | Global     | 1         | 2     | Log-transformed SEV scalar: Diarrhea                  | 0               |
| Protein-energy malnutrition | Female | 28-364 days | 1-4 years | Global     | 1         | 2     | SEV unsafe water                                      | 34              |
| Protein-energy malnutrition | Female | 28-364 days | 1-4 years | Global     | 1         | 2     | SEV unsafe sanitation                                 | 125             |
| Protein-energy malnutrition | Female | 28-364 days | 1-4 years | Global     | 1         | 2     | Alcohol SEV, age and sex specific                     | --              |
| Protein-energy malnutrition | Female | 28-364 days | 1-4 years | Global     | 1         | 2     | Mortality Rate Due to War Shocks (per 1 person)       | --              |
| Protein-energy malnutrition | Female | 28-364 days | 1-4 years | Global     | -1        | 3     | Education (years per capita)                          | 0               |
| Protein-energy malnutrition | Female | 28-364 days | 1-4 years | Global     | -1        | 3     | Socio-demographic Index                               | 0               |
| Protein-energy malnutrition | Female | 28-364 days | 1-4 years | Global     | -1        | 3     | Antenatal Care (4 visits) Coverage (proportion)       | 504             |
| Protein-energy malnutrition | Female | 28-364 days | 1-4 years | Global     | -1        | 3     | LDI (IS per capita)                                   | --              |
| Protein-energy malnutrition | Female | 5-9 years   | 95+ years | Data Rich  | -1        | 1     | energy unadjusted(kcal)                               | --              |
| Protein-energy malnutrition | Female | 5-9 years   | 95+ years | Data Rich  | 1         | 1     | Age-Standardize Prevalence of Severe Anemia           | --              |
| Protein-energy malnutrition | Female | 5-9 years   | 95+ years | Data Rich  | 1         | 1     | Age-standardized wasting (weight-for-height) SEV      | --              |
| Protein-energy malnutrition | Female | 5-9 years   | 95+ years | Data Rich  | 1         | 1     | Malnutrition Shock mortality rate                     | --              |
| Protein-energy malnutrition | Female | 5-9 years   | 95+ years | Data Rich  | 1         | 1     | Underweight, age and sex specific                     | --              |
| Protein-energy malnutrition | Female | 5-9 years   | 95+ years | Data Rich  | -1        | 2     | Health System Access (capped)                         | --              |
| Protein-energy malnutrition | Female | 5-9 years   | 95+ years | Data Rich  | -1        | 2     | Healthcare access and quality index                   | --              |
| Protein-energy malnutrition | Female | 5-9 years   | 95+ years | Data Rich  | 0         | 2     | Rainfall Quintile 2 (proportion)                      | 1000            |
| Protein-energy malnutrition | Female | 5-9 years   | 95+ years | Data Rich  | 0         | 2     | Rainfall Quintile 1 (proportion)                      | --              |
| Protein-energy malnutrition | Female | 5-9 years   | 95+ years | Data Rich  | 1         | 2     | Alcohol SEV, age and sex specific                     | --              |
| Protein-energy malnutrition | Female | 5-9 years   | 95+ years | Data Rich  | 1         | 2     | Log-transformed SEV scalar: Diarrhea                  | --              |
| Protein-energy malnutrition | Female | 5-9 years   | 95+ years | Data Rich  | 1         | 2     | Mortality Rate Due to War Shocks (per 1 person)       | --              |
| Protein-energy malnutrition | Female | 5-9 years   | 95+ years | Data Rich  | 1         | 2     | SEV unsafe sanitation                                 | --              |
| Protein-energy malnutrition | Female | 5-9 years   | 95+ years | Data Rich  | 1         | 2     | SEV unsafe water                                      | --              |
| Protein-energy malnutrition | Female | 5-9 years   | 95+ years | Data Rich  | -1        | 3     | Antenatal Care (4 visits) Coverage (proportion)       | --              |
| Protein-energy malnutrition | Female | 5-9 years   | 95+ years | Data Rich  | -1        | 3     | Education (years per capita)                          | --              |
| Protein-energy malnutrition | Female | 5-9 years   | 95+ years | Data Rich  | -1        | 3     | LDI (IS per capita)                                   | --              |
| Protein-energy malnutrition | Female | 5-9 years   | 95+ years | Data Rich  | -1        | 3     | Socio-demographic Index                               | --              |
| Protein-energy malnutrition | Female | 5-9 years   | 95+ years | Global     | -1        | 1     | energy unadjusted(kcal)                               | --              |
| Protein-energy malnutrition | Female | 5-9 years   | 95+ years | Global     | 1         | 1     | Age-Standardize Prevalence of Severe Anemia           | 197             |
| Protein-energy malnutrition | Female | 5-9 years   | 95+ years | Global     | 1         | 1     | Age-standardized wasting (weight-for-height) SEV      | 628             |
| Protein-energy malnutrition | Female | 5-9 years   | 95+ years | Global     | 1         | 1     | Underweight, age and sex specific                     | 783             |
| Protein-energy malnutrition | Female | 5-9 years   | 95+ years | Global     | 1         | 1     | Malnutrition Shock mortality rate                     | --              |
| Protein-energy malnutrition | Female | 5-9 years   | 95+ years | Global     | -1        | 2     | Health System Access (capped)                         | --              |
| Protein-energy malnutrition | Female | 5-9 years   | 95+ years | Global     | -1        | 2     | Healthcare access and quality index                   | --              |
| Protein-energy malnutrition | Female | 5-9 years   | 95+ years | Global     | 0         | 2     | Rainfall Quintile 1 (proportion)                      | 255             |

**Appendix Table 9: CODEm covariates used, level of covariate, and expected direction of covariate by cause, sex, and age**

*Covariates that CODEm did not select during the covariate selection process have no draw counts listed.*

| Cause                          | Sex    | Age Start   | Age End   | Model Type | Direction | Level | Covariate Name                                        | Number of Draws |
|--------------------------------|--------|-------------|-----------|------------|-----------|-------|-------------------------------------------------------|-----------------|
| Protein-energy malnutrition    | Female | 5-9 years   | 95+ years | Global     | 0         | 2     | Rainfall Quintile 2 (proportion)                      | 597             |
| Protein-energy malnutrition    | Female | 5-9 years   | 95+ years | Global     | 1         | 2     | Alcohol SEV, age and sex specific                     | 7               |
| Protein-energy malnutrition    | Female | 5-9 years   | 95+ years | Global     | 1         | 2     | Log-transformed SEV scalar: Diarrhea                  | 62              |
| Protein-energy malnutrition    | Female | 5-9 years   | 95+ years | Global     | 1         | 2     | SEV unsafe sanitation                                 | 84              |
| Protein-energy malnutrition    | Female | 5-9 years   | 95+ years | Global     | 1         | 2     | SEV unsafe water                                      | 279             |
| Protein-energy malnutrition    | Female | 5-9 years   | 95+ years | Global     | 1         | 2     | Mortality Rate Due to War Shocks (per 1 person)       | --              |
| Protein-energy malnutrition    | Female | 5-9 years   | 95+ years | Global     | -1        | 3     | Socio-demographic Index                               | 2               |
| Protein-energy malnutrition    | Female | 5-9 years   | 95+ years | Global     | -1        | 3     | Education (years per capita)                          | 5               |
| Protein-energy malnutrition    | Female | 5-9 years   | 95+ years | Global     | -1        | 3     | Antenatal Care (4 visits) Coverage (proportion)       | 426             |
| Protein-energy malnutrition    | Female | 5-9 years   | 95+ years | Global     | -1        | 3     | LDI (I\$ per capita)                                  | --              |
| Protein-energy malnutrition    | Male   | 28-364 days | 1-4 years | Data Rich  | -1        | 1     | energy unadjusted(kcal)                               | --              |
| Protein-energy malnutrition    | Male   | 28-364 days | 1-4 years | Data Rich  | 1         | 1     | Underweight, age and sex specific                     | 337             |
| Protein-energy malnutrition    | Male   | 28-364 days | 1-4 years | Data Rich  | 1         | 1     | Age-Standardize Prevalence of Severe Anemia           | 388             |
| Protein-energy malnutrition    | Male   | 28-364 days | 1-4 years | Data Rich  | 1         | 1     | Age- and sex-specific wasting (weight-for-height) SEV | 672             |
| Protein-energy malnutrition    | Male   | 28-364 days | 1-4 years | Data Rich  | 1         | 1     | Malnutrition Shock mortality rate                     | --              |
| Protein-energy malnutrition    | Male   | 28-364 days | 1-4 years | Data Rich  | -1        | 2     | Healthcare access and quality index                   | 9               |
| Protein-energy malnutrition    | Male   | 28-364 days | 1-4 years | Data Rich  | -1        | 2     | Health System Access (capped)                         | 11              |
| Protein-energy malnutrition    | Male   | 28-364 days | 1-4 years | Data Rich  | 0         | 2     | Rainfall Quintile 1 (proportion)                      | 294             |
| Protein-energy malnutrition    | Male   | 28-364 days | 1-4 years | Data Rich  | 0         | 2     | Rainfall Quintile 2 (proportion)                      | 359             |
| Protein-energy malnutrition    | Male   | 28-364 days | 1-4 years | Data Rich  | 1         | 2     | Log-transformed SEV scalar: Diarrhea                  | 11              |
| Protein-energy malnutrition    | Male   | 28-364 days | 1-4 years | Data Rich  | 1         | 2     | SEV unsafe water                                      | 11              |
| Protein-energy malnutrition    | Male   | 28-364 days | 1-4 years | Data Rich  | 1         | 2     | SEV unsafe sanitation                                 | 52              |
| Protein-energy malnutrition    | Male   | 28-364 days | 1-4 years | Data Rich  | 1         | 2     | Alcohol SEV, age and sex specific                     | --              |
| Protein-energy malnutrition    | Male   | 28-364 days | 1-4 years | Data Rich  | 1         | 2     | Mortality Rate Due to War Shocks (per 1 person)       | --              |
| Protein-energy malnutrition    | Male   | 28-364 days | 1-4 years | Data Rich  | -1        | 3     | Education (years per capita)                          | 17              |
| Protein-energy malnutrition    | Male   | 28-364 days | 1-4 years | Data Rich  | -1        | 3     | Socio-demographic Index                               | 18              |
| Protein-energy malnutrition    | Male   | 28-364 days | 1-4 years | Data Rich  | -1        | 3     | LDI (I\$ per capita)                                  | --              |
| Protein-energy malnutrition    | Male   | 28-364 days | 1-4 years | Global     | -1        | 1     | energy unadjusted(kcal)                               | --              |
| Protein-energy malnutrition    | Male   | 28-364 days | 1-4 years | Global     | 1         | 1     | Age-Standardize Prevalence of Severe Anemia           | 190             |
| Protein-energy malnutrition    | Male   | 28-364 days | 1-4 years | Global     | 1         | 1     | Age- and sex-specific wasting (weight-for-height) SEV | 641             |
| Protein-energy malnutrition    | Male   | 28-364 days | 1-4 years | Global     | 1         | 1     | Underweight, age and sex specific                     | 759             |
| Protein-energy malnutrition    | Male   | 28-364 days | 1-4 years | Global     | 1         | 1     | Malnutrition Shock mortality rate                     | --              |
| Protein-energy malnutrition    | Male   | 28-364 days | 1-4 years | Global     | -1        | 2     | Health System Access (capped)                         | 0               |
| Protein-energy malnutrition    | Male   | 28-364 days | 1-4 years | Global     | -1        | 2     | Healthcare access and quality index                   | 0               |
| Protein-energy malnutrition    | Male   | 28-364 days | 1-4 years | Global     | 0         | 2     | Rainfall Quintile 1 (proportion)                      | 755             |
| Protein-energy malnutrition    | Male   | 28-364 days | 1-4 years | Global     | 0         | 2     | Rainfall Quintile 2 (proportion)                      | 803             |
| Protein-energy malnutrition    | Male   | 28-364 days | 1-4 years | Global     | 1         | 2     | Log-transformed SEV scalar: Diarrhea                  | 0               |
| Protein-energy malnutrition    | Male   | 28-364 days | 1-4 years | Global     | 1         | 2     | SEV unsafe water                                      | 15              |
| Protein-energy malnutrition    | Male   | 28-364 days | 1-4 years | Global     | 1         | 2     | SEV unsafe sanitation                                 | 716             |
| Protein-energy malnutrition    | Male   | 28-364 days | 1-4 years | Global     | 1         | 2     | Alcohol SEV, age and sex specific                     | --              |
| Protein-energy malnutrition    | Male   | 28-364 days | 1-4 years | Global     | 1         | 2     | Mortality Rate Due to War Shocks (per 1 person)       | --              |
| Protein-energy malnutrition    | Male   | 28-364 days | 1-4 years | Global     | -1        | 3     | Education (years per capita)                          | 0               |
| Protein-energy malnutrition    | Male   | 28-364 days | 1-4 years | Global     | -1        | 3     | Socio-demographic Index                               | 0               |
| Protein-energy malnutrition    | Male   | 28-364 days | 1-4 years | Global     | -1        | 3     | LDI (I\$ per capita)                                  | --              |
| Protein-energy malnutrition    | Male   | 5-9 years   | 95+ years | Data Rich  | -1        | 1     | energy unadjusted(kcal)                               | --              |
| Protein-energy malnutrition    | Male   | 5-9 years   | 95+ years | Data Rich  | 1         | 1     | Age-Standardize Prevalence of Severe Anemia           | 254             |
| Protein-energy malnutrition    | Male   | 5-9 years   | 95+ years | Data Rich  | 1         | 1     | Underweight, age and sex specific                     | 254             |
| Protein-energy malnutrition    | Male   | 5-9 years   | 95+ years | Data Rich  | 1         | 1     | Malnutrition Shock mortality rate                     | --              |
| Protein-energy malnutrition    | Male   | 5-9 years   | 95+ years | Data Rich  | -1        | 2     | Health System Access (capped)                         | --              |
| Protein-energy malnutrition    | Male   | 5-9 years   | 95+ years | Data Rich  | -1        | 2     | Healthcare access and quality index                   | --              |
| Protein-energy malnutrition    | Male   | 5-9 years   | 95+ years | Data Rich  | 0         | 2     | Rainfall Quintile 2 (proportion)                      | 294             |
| Protein-energy malnutrition    | Male   | 5-9 years   | 95+ years | Data Rich  | 0         | 2     | Rainfall Quintile 1 (proportion)                      | --              |
| Protein-energy malnutrition    | Male   | 5-9 years   | 95+ years | Data Rich  | 1         | 2     | SEV unsafe sanitation                                 | 185             |
| Protein-energy malnutrition    | Male   | 5-9 years   | 95+ years | Data Rich  | 1         | 2     | Alcohol SEV, age and sex specific                     | --              |
| Protein-energy malnutrition    | Male   | 5-9 years   | 95+ years | Data Rich  | 1         | 2     | Log-transformed SEV scalar: Diarrhea                  | --              |
| Protein-energy malnutrition    | Male   | 5-9 years   | 95+ years | Data Rich  | 1         | 2     | Mortality Rate Due to War Shocks (per 1 person)       | --              |
| Protein-energy malnutrition    | Male   | 5-9 years   | 95+ years | Data Rich  | 1         | 2     | SEV unsafe water                                      | --              |
| Protein-energy malnutrition    | Male   | 5-9 years   | 95+ years | Data Rich  | -1        | 3     | Education (years per capita)                          | --              |
| Protein-energy malnutrition    | Male   | 5-9 years   | 95+ years | Data Rich  | -1        | 3     | LDI (I\$ per capita)                                  | --              |
| Protein-energy malnutrition    | Male   | 5-9 years   | 95+ years | Data Rich  | -1        | 3     | Socio-demographic Index                               | --              |
| Protein-energy malnutrition    | Male   | 5-9 years   | 95+ years | Global     | -1        | 1     | energy unadjusted(kcal)                               | --              |
| Protein-energy malnutrition    | Male   | 5-9 years   | 95+ years | Global     | 1         | 1     | Age-Standardize Prevalence of Severe Anemia           | 25              |
| Protein-energy malnutrition    | Male   | 5-9 years   | 95+ years | Global     | 1         | 1     | Underweight, age and sex specific                     | 535             |
| Protein-energy malnutrition    | Male   | 5-9 years   | 95+ years | Global     | 1         | 1     | Malnutrition Shock mortality rate                     | --              |
| Protein-energy malnutrition    | Male   | 5-9 years   | 95+ years | Global     | -1        | 2     | Health System Access (capped)                         | --              |
| Protein-energy malnutrition    | Male   | 5-9 years   | 95+ years | Global     | -1        | 2     | Healthcare access and quality index                   | --              |
| Protein-energy malnutrition    | Male   | 5-9 years   | 95+ years | Global     | 0         | 2     | Rainfall Quintile 2 (proportion)                      | 5               |
| Protein-energy malnutrition    | Male   | 5-9 years   | 95+ years | Global     | 0         | 2     | Rainfall Quintile 1 (proportion)                      | 13              |
| Protein-energy malnutrition    | Male   | 5-9 years   | 95+ years | Global     | 1         | 2     | SEV unsafe sanitation                                 | 56              |
| Protein-energy malnutrition    | Male   | 5-9 years   | 95+ years | Global     | 1         | 2     | Log-transformed SEV scalar: Diarrhea                  | 185             |
| Protein-energy malnutrition    | Male   | 5-9 years   | 95+ years | Global     | 1         | 2     | SEV unsafe water                                      | 410             |
| Protein-energy malnutrition    | Male   | 5-9 years   | 95+ years | Global     | 1         | 2     | Alcohol SEV, age and sex specific                     | --              |
| Protein-energy malnutrition    | Male   | 5-9 years   | 95+ years | Global     | 1         | 2     | Mortality Rate Due to War Shocks (per 1 person)       | --              |
| Protein-energy malnutrition    | Male   | 5-9 years   | 95+ years | Global     | -1        | 3     | Education (years per capita)                          | 10              |
| Protein-energy malnutrition    | Male   | 5-9 years   | 95+ years | Global     | -1        | 3     | Socio-demographic Index                               | 94              |
| Protein-energy malnutrition    | Male   | 5-9 years   | 95+ years | Global     | -1        | 3     | Maternal Education (years per capita)                 | 155             |
| Protein-energy malnutrition    | Male   | 5-9 years   | 95+ years | Global     | -1        | 3     | LDI (I\$ per capita)                                  | --              |
| Other nutritional deficiencies | Female | 28-364 days | 95+ years | Data Rich  | 1         | 1     | Age-Standardize Prevalence of Severe Anemia           | 191             |

**Appendix Table 9: CODEm covariates used, level of covariate, and expected direction of covariate by cause, sex, and age**

*Covariates that CODEm did not select during the covariate selection process have no draw counts listed.*

| Cause                          | Sex    | Age Start   | Age End   | Model Type | Direction | Level | Covariate Name                                    | Number of Draws |
|--------------------------------|--------|-------------|-----------|------------|-----------|-------|---------------------------------------------------|-----------------|
| Other nutritional deficiencies | Female | 28-364 days | 95+ years | Data Rich  | 1         | 1     | Age-standardized underweight (weight-for-age) SEV | 224             |
| Other nutritional deficiencies | Female | 28-364 days | 95+ years | Data Rich  | 1         | 1     | Underweight, age and sex specific                 | 879             |
| Other nutritional deficiencies | Female | 28-364 days | 95+ years | Data Rich  | 1         | 1     | Malnutrition Shock mortality rate                 | --              |
| Other nutritional deficiencies | Female | 28-364 days | 95+ years | Data Rich  | -1        | 2     | energy unadjusted(kcal)                           | 22              |
| Other nutritional deficiencies | Female | 28-364 days | 95+ years | Data Rich  | -1        | 2     | Healthcare access and quality index               | 459             |
| Other nutritional deficiencies | Female | 28-364 days | 95+ years | Data Rich  | -1        | 2     | Health System Access (capped)                     | 486             |
| Other nutritional deficiencies | Female | 28-364 days | 95+ years | Data Rich  | 0         | 2     | Rainfall Quintile 2 (proportion)                  | 92              |
| Other nutritional deficiencies | Female | 28-364 days | 95+ years | Data Rich  | 0         | 2     | Rainfall Quintile 1 (proportion)                  | 496             |
| Other nutritional deficiencies | Female | 28-364 days | 95+ years | Data Rich  | 1         | 2     | SEV unsafe sanitation                             | 13              |
| Other nutritional deficiencies | Female | 28-364 days | 95+ years | Data Rich  | 1         | 2     | Log-transformed SEV scalar: Diarrhea              | 27              |
| Other nutritional deficiencies | Female | 28-364 days | 95+ years | Data Rich  | 1         | 2     | SEV unsafe water                                  | 28              |
| Other nutritional deficiencies | Female | 28-364 days | 95+ years | Data Rich  | 1         | 2     | Alcohol SEV, age and sex specific                 | --              |
| Other nutritional deficiencies | Female | 28-364 days | 95+ years | Data Rich  | 1         | 2     | Mortality Rate Due to War Shocks (per 1 person)   | --              |
| Other nutritional deficiencies | Female | 28-364 days | 95+ years | Data Rich  | -1        | 3     | Socio-demographic Index                           | 453             |
| Other nutritional deficiencies | Female | 28-364 days | 95+ years | Data Rich  | -1        | 3     | Education (years per capita)                      | 522             |
| Other nutritional deficiencies | Female | 28-364 days | 95+ years | Data Rich  | -1        | 3     | LDI (US\$ per capita)                             | --              |
| Other nutritional deficiencies | Female | 28-364 days | 95+ years | Global     | 1         | 1     | Age-standardized underweight (weight-for-age) SEV | 151             |
| Other nutritional deficiencies | Female | 28-364 days | 95+ years | Global     | 1         | 1     | Age-Standardize Prevalence of Severe Anemia       | 323             |
| Other nutritional deficiencies | Female | 28-364 days | 95+ years | Global     | 1         | 1     | Underweight, age and sex specific                 | 744             |
| Other nutritional deficiencies | Female | 28-364 days | 95+ years | Global     | 1         | 1     | Malnutrition Shock mortality rate                 | --              |
| Other nutritional deficiencies | Female | 28-364 days | 95+ years | Global     | -1        | 2     | energy unadjusted(kcal)                           | 32              |
| Other nutritional deficiencies | Female | 28-364 days | 95+ years | Global     | -1        | 2     | Healthcare access and quality index               | 535             |
| Other nutritional deficiencies | Female | 28-364 days | 95+ years | Global     | -1        | 2     | Health System Access (capped)                     | 547             |
| Other nutritional deficiencies | Female | 28-364 days | 95+ years | Global     | 0         | 2     | Rainfall Quintile 1 (proportion)                  | 86              |
| Other nutritional deficiencies | Female | 28-364 days | 95+ years | Global     | 0         | 2     | Rainfall Quintile 2 (proportion)                  | 582             |
| Other nutritional deficiencies | Female | 28-364 days | 95+ years | Global     | 1         | 2     | SEV unsafe sanitation                             | 4               |
| Other nutritional deficiencies | Female | 28-364 days | 95+ years | Global     | 1         | 2     | SEV unsafe water                                  | 40              |
| Other nutritional deficiencies | Female | 28-364 days | 95+ years | Global     | 1         | 2     | Log-transformed SEV scalar: Diarrhea              | 85              |
| Other nutritional deficiencies | Female | 28-364 days | 95+ years | Global     | 1         | 2     | Alcohol SEV, age and sex specific                 | --              |
| Other nutritional deficiencies | Female | 28-364 days | 95+ years | Global     | 1         | 2     | Mortality Rate Due to War Shocks (per 1 person)   | --              |
| Other nutritional deficiencies | Female | 28-364 days | 95+ years | Global     | -1        | 3     | Socio-demographic Index                           | 170             |
| Other nutritional deficiencies | Female | 28-364 days | 95+ years | Global     | -1        | 3     | Education (years per capita)                      | 471             |
| Other nutritional deficiencies | Female | 28-364 days | 95+ years | Global     | -1        | 3     | LDI (US\$ per capita)                             | --              |
| Other nutritional deficiencies | Male   | 28-364 days | 95+ years | Data Rich  | 1         | 1     | Age-standardized underweight (weight-for-age) SEV | 104             |
| Other nutritional deficiencies | Male   | 28-364 days | 95+ years | Data Rich  | 1         | 1     | Age-Standardize Prevalence of Severe Anemia       | 191             |
| Other nutritional deficiencies | Male   | 28-364 days | 95+ years | Data Rich  | 1         | 1     | Underweight, age and sex specific                 | 899             |
| Other nutritional deficiencies | Male   | 28-364 days | 95+ years | Data Rich  | 1         | 1     | Malnutrition Shock mortality rate                 | --              |
| Other nutritional deficiencies | Male   | 28-364 days | 95+ years | Data Rich  | -1        | 2     | Healthcare access and quality index               | 7               |
| Other nutritional deficiencies | Male   | 28-364 days | 95+ years | Data Rich  | -1        | 2     | Health System Access (capped)                     | 245             |
| Other nutritional deficiencies | Male   | 28-364 days | 95+ years | Data Rich  | -1        | 2     | energy unadjusted(kcal)                           | 299             |
| Other nutritional deficiencies | Male   | 28-364 days | 95+ years | Data Rich  | 0         | 2     | Rainfall Quintile 2 (proportion)                  | 411             |
| Other nutritional deficiencies | Male   | 28-364 days | 95+ years | Data Rich  | 0         | 2     | Rainfall Quintile 1 (proportion)                  | 500             |
| Other nutritional deficiencies | Male   | 28-364 days | 95+ years | Data Rich  | 1         | 2     | SEV unsafe sanitation                             | 22              |
| Other nutritional deficiencies | Male   | 28-364 days | 95+ years | Data Rich  | 1         | 2     | SEV unsafe water                                  | 324             |
| Other nutritional deficiencies | Male   | 28-364 days | 95+ years | Data Rich  | 1         | 2     | Log-transformed SEV scalar: Diarrhea              | 356             |
| Other nutritional deficiencies | Male   | 28-364 days | 95+ years | Data Rich  | 1         | 2     | Alcohol SEV, age and sex specific                 | --              |
| Other nutritional deficiencies | Male   | 28-364 days | 95+ years | Data Rich  | 1         | 2     | Mortality Rate Due to War Shocks (per 1 person)   | --              |
| Other nutritional deficiencies | Male   | 28-364 days | 95+ years | Data Rich  | -1        | 3     | Socio-demographic Index                           | 249             |
| Other nutritional deficiencies | Male   | 28-364 days | 95+ years | Data Rich  | -1        | 3     | Education (years per capita)                      | --              |
| Other nutritional deficiencies | Male   | 28-364 days | 95+ years | Data Rich  | -1        | 3     | LDI (US\$ per capita)                             | --              |
| Other nutritional deficiencies | Male   | 28-364 days | 95+ years | Global     | 1         | 1     | Age-Standardize Prevalence of Severe Anemia       | 412             |
| Other nutritional deficiencies | Male   | 28-364 days | 95+ years | Global     | 1         | 1     | Age-standardized underweight (weight-for-age) SEV | 935             |
| Other nutritional deficiencies | Male   | 28-364 days | 95+ years | Global     | 1         | 1     | Underweight, age and sex specific                 | 949             |
| Other nutritional deficiencies | Male   | 28-364 days | 95+ years | Global     | 1         | 1     | Malnutrition Shock mortality rate                 | --              |
| Other nutritional deficiencies | Male   | 28-364 days | 95+ years | Global     | -1        | 2     | Healthcare access and quality index               | 15              |
| Other nutritional deficiencies | Male   | 28-364 days | 95+ years | Global     | -1        | 2     | energy unadjusted(kcal)                           | 170             |
| Other nutritional deficiencies | Male   | 28-364 days | 95+ years | Global     | -1        | 2     | Health System Access (capped)                     | 237             |
| Other nutritional deficiencies | Male   | 28-364 days | 95+ years | Global     | 0         | 2     | Rainfall Quintile 1 (proportion)                  | 120             |
| Other nutritional deficiencies | Male   | 28-364 days | 95+ years | Global     | 0         | 2     | Rainfall Quintile 2 (proportion)                  | 383             |
| Other nutritional deficiencies | Male   | 28-364 days | 95+ years | Global     | 1         | 2     | SEV unsafe sanitation                             | 1               |
| Other nutritional deficiencies | Male   | 28-364 days | 95+ years | Global     | 1         | 2     | SEV unsafe water                                  | 24              |
| Other nutritional deficiencies | Male   | 28-364 days | 95+ years | Global     | 1         | 2     | Log-transformed SEV scalar: Diarrhea              | 150             |
| Other nutritional deficiencies | Male   | 28-364 days | 95+ years | Global     | 1         | 2     | Alcohol SEV, age and sex specific                 | --              |
| Other nutritional deficiencies | Male   | 28-364 days | 95+ years | Global     | 1         | 2     | Mortality Rate Due to War Shocks (per 1 person)   | --              |
| Other nutritional deficiencies | Male   | 28-364 days | 95+ years | Global     | -1        | 3     | Education (years per capita)                      | 202             |
| Other nutritional deficiencies | Male   | 28-364 days | 95+ years | Global     | -1        | 3     | LDI (US\$ per capita)                             | --              |
| Other nutritional deficiencies | Male   | 28-364 days | 95+ years | Global     | -1        | 3     | Socio-demographic Index                           | --              |
| Lip and oral cavity cancer     | Female | 15-19 years | 95+ years | Data Rich  | -1        | 1     | vegetables adjusted(g)                            | 434             |
| Lip and oral cavity cancer     | Female | 15-19 years | 95+ years | Data Rich  | 1         | 1     | Cumulative Cigarettes (10 Years)                  | 0               |
| Lip and oral cavity cancer     | Female | 15-19 years | 95+ years | Data Rich  | 1         | 1     | Cumulative Cigarettes (5 Years)                   | 0               |
| Lip and oral cavity cancer     | Female | 15-19 years | 95+ years | Data Rich  | 1         | 1     | Cumulative Cigarettes (15 Years)                  | 16              |
| Lip and oral cavity cancer     | Female | 15-19 years | 95+ years | Data Rich  | 1         | 1     | Smoking Prevalence                                | 35              |
| Lip and oral cavity cancer     | Female | 15-19 years | 95+ years | Data Rich  | 1         | 1     | Log-transformed SEV scalar: Mouth C               | 121             |
| Lip and oral cavity cancer     | Female | 15-19 years | 95+ years | Data Rich  | 1         | 1     | Alcohol (liters per capita)                       | 201             |
| Lip and oral cavity cancer     | Female | 15-19 years | 95+ years | Data Rich  | 1         | 1     | Cumulative Cigarettes (20 Years)                  | 278             |
| Lip and oral cavity cancer     | Female | 15-19 years | 95+ years | Data Rich  | 1         | 1     | Tobacco (cigarettes per capita)                   | --              |
| Lip and oral cavity cancer     | Female | 15-19 years | 95+ years | Data Rich  | -1        | 2     | Healthcare access and quality index               | 22              |
| Lip and oral cavity cancer     | Female | 15-19 years | 95+ years | Data Rich  | -1        | 2     | Health System Access 2 (unitless)                 | 366             |

**Appendix Table 9: CODEm covariates used, level of covariate, and expected direction of covariate by cause, sex, and age**

*Covariates that CODEm did not select during the covariate selection process have no draw counts listed.*

| Cause                      | Sex    | Age Start   | Age End   | Model Type | Direction | Level | Covariate Name                                      | Number of Draws |
|----------------------------|--------|-------------|-----------|------------|-----------|-------|-----------------------------------------------------|-----------------|
| Lip and oral cavity cancer | Female | 15-19 years | 95+ years | Data Rich  | -1        | 2     | fruits adjusted(g)                                  | --              |
| Lip and oral cavity cancer | Female | 15-19 years | 95+ years | Data Rich  | 1         | 2     | red meats adjusted(g)                               | 479             |
| Lip and oral cavity cancer | Female | 15-19 years | 95+ years | Data Rich  | -1        | 3     | Education (years per capita)                        | --              |
| Lip and oral cavity cancer | Female | 15-19 years | 95+ years | Data Rich  | 0         | 3     | Socio-demographic Index                             | 810             |
| Lip and oral cavity cancer | Female | 15-19 years | 95+ years | Data Rich  | 0         | 3     | LDI (1\$ per capita)                                | --              |
| Lip and oral cavity cancer | Female | 15-19 years | 95+ years | Global     | -1        | 1     | vegetables adjusted(g)                              | 1000            |
| Lip and oral cavity cancer | Female | 15-19 years | 95+ years | Global     | 1         | 1     | Cumulative Cigarettes (5 Years)                     | 0               |
| Lip and oral cavity cancer | Female | 15-19 years | 95+ years | Global     | 1         | 1     | Tobacco (cigarettes per capita)                     | 0               |
| Lip and oral cavity cancer | Female | 15-19 years | 95+ years | Global     | 1         | 1     | Cumulative Cigarettes (15 Years)                    | 26              |
| Lip and oral cavity cancer | Female | 15-19 years | 95+ years | Global     | 1         | 1     | Log-transformed SEV scalar: Mouth C                 | 74              |
| Lip and oral cavity cancer | Female | 15-19 years | 95+ years | Global     | 1         | 1     | Cumulative Cigarettes (10 Years)                    | 102             |
| Lip and oral cavity cancer | Female | 15-19 years | 95+ years | Global     | 1         | 1     | Cumulative Cigarettes (20 Years)                    | 304             |
| Lip and oral cavity cancer | Female | 15-19 years | 95+ years | Global     | 1         | 1     | Smoking Prevalence                                  | 566             |
| Lip and oral cavity cancer | Female | 15-19 years | 95+ years | Global     | 1         | 1     | Alcohol (liters per capita)                         | 849             |
| Lip and oral cavity cancer | Female | 15-19 years | 95+ years | Global     | -1        | 2     | fruits adjusted(g)                                  | 0               |
| Lip and oral cavity cancer | Female | 15-19 years | 95+ years | Global     | -1        | 2     | Healthcare access and quality index                 | 298             |
| Lip and oral cavity cancer | Female | 15-19 years | 95+ years | Global     | 1         | 2     | red meats adjusted(g)                               | 99              |
| Lip and oral cavity cancer | Female | 15-19 years | 95+ years | Global     | -1        | 3     | Education (years per capita)                        | 0               |
| Lip and oral cavity cancer | Female | 15-19 years | 95+ years | Global     | 0         | 3     | Socio-demographic Index                             | 684             |
| Lip and oral cavity cancer | Female | 15-19 years | 95+ years | Global     | 0         | 3     | LDI (1\$ per capita)                                | --              |
| Lip and oral cavity cancer | Male   | 15-19 years | 95+ years | Data Rich  | -1        | 1     | vegetables adjusted(g)                              | 60              |
| Lip and oral cavity cancer | Male   | 15-19 years | 95+ years | Data Rich  | 1         | 1     | Tobacco (cigarettes per capita)                     | 0               |
| Lip and oral cavity cancer | Male   | 15-19 years | 95+ years | Data Rich  | 1         | 1     | Cumulative Cigarettes (10 Years)                    | 6               |
| Lip and oral cavity cancer | Male   | 15-19 years | 95+ years | Data Rich  | 1         | 1     | Cumulative Cigarettes (5 Years)                     | 12              |
| Lip and oral cavity cancer | Male   | 15-19 years | 95+ years | Data Rich  | 1         | 1     | Smoking Prevalence                                  | 13              |
| Lip and oral cavity cancer | Male   | 15-19 years | 95+ years | Data Rich  | 1         | 1     | Cumulative Cigarettes (15 Years)                    | 16              |
| Lip and oral cavity cancer | Male   | 15-19 years | 95+ years | Data Rich  | 1         | 1     | Cumulative Cigarettes (20 Years)                    | 30              |
| Lip and oral cavity cancer | Male   | 15-19 years | 95+ years | Data Rich  | 1         | 1     | Alcohol (liters per capita)                         | 458             |
| Lip and oral cavity cancer | Male   | 15-19 years | 95+ years | Data Rich  | 1         | 1     | Log-transformed SEV scalar: Mouth C                 | 745             |
| Lip and oral cavity cancer | Male   | 15-19 years | 95+ years | Data Rich  | -1        | 2     | Healthcare access and quality index                 | 0               |
| Lip and oral cavity cancer | Male   | 15-19 years | 95+ years | Data Rich  | -1        | 2     | fruits adjusted(g)                                  | --              |
| Lip and oral cavity cancer | Male   | 15-19 years | 95+ years | Data Rich  | 1         | 2     | red meats adjusted(g)                               | 604             |
| Lip and oral cavity cancer | Male   | 15-19 years | 95+ years | Data Rich  | -1        | 3     | Education (years per capita)                        | 7               |
| Lip and oral cavity cancer | Male   | 15-19 years | 95+ years | Data Rich  | 0         | 3     | Socio-demographic Index                             | 623             |
| Lip and oral cavity cancer | Male   | 15-19 years | 95+ years | Data Rich  | 0         | 3     | LDI (1\$ per capita)                                | --              |
| Lip and oral cavity cancer | Male   | 15-19 years | 95+ years | Global     | -1        | 1     | vegetables adjusted(g)                              | 293             |
| Lip and oral cavity cancer | Male   | 15-19 years | 95+ years | Global     | 1         | 1     | Cumulative Cigarettes (5 Years)                     | 0               |
| Lip and oral cavity cancer | Male   | 15-19 years | 95+ years | Global     | 1         | 1     | Cumulative Cigarettes (10 Years)                    | 1               |
| Lip and oral cavity cancer | Male   | 15-19 years | 95+ years | Global     | 1         | 1     | Smoking Prevalence                                  | 4               |
| Lip and oral cavity cancer | Male   | 15-19 years | 95+ years | Global     | 1         | 1     | Cumulative Cigarettes (15 Years)                    | 41              |
| Lip and oral cavity cancer | Male   | 15-19 years | 95+ years | Global     | 1         | 1     | Cumulative Cigarettes (20 Years)                    | 233             |
| Lip and oral cavity cancer | Male   | 15-19 years | 95+ years | Global     | 1         | 1     | Tobacco (cigarettes per capita)                     | 254             |
| Lip and oral cavity cancer | Male   | 15-19 years | 95+ years | Global     | 1         | 1     | Log-transformed SEV scalar: Mouth C                 | 495             |
| Lip and oral cavity cancer | Male   | 15-19 years | 95+ years | Global     | 1         | 1     | Alcohol (liters per capita)                         | 568             |
| Lip and oral cavity cancer | Male   | 15-19 years | 95+ years | Global     | -1        | 2     | Healthcare access and quality index                 | 329             |
| Lip and oral cavity cancer | Male   | 15-19 years | 95+ years | Global     | -1        | 2     | fruits adjusted(g)                                  | --              |
| Lip and oral cavity cancer | Male   | 15-19 years | 95+ years | Global     | 1         | 2     | red meats adjusted(g)                               | 659             |
| Lip and oral cavity cancer | Male   | 15-19 years | 95+ years | Global     | -1        | 3     | Education (years per capita)                        | 0               |
| Lip and oral cavity cancer | Male   | 15-19 years | 95+ years | Global     | 0         | 3     | Socio-demographic Index                             | 572             |
| Lip and oral cavity cancer | Male   | 15-19 years | 95+ years | Global     | 0         | 3     | LDI (1\$ per capita)                                | --              |
| Nasopharynx cancer         | Female | 5-9 years   | 95+ years | Data Rich  | 1         | 1     | Tobacco (cigarettes per capita)                     | 0               |
| Nasopharynx cancer         | Female | 5-9 years   | 95+ years | Data Rich  | 1         | 1     | Cumulative Cigarettes (10 Years)                    | 47              |
| Nasopharynx cancer         | Female | 5-9 years   | 95+ years | Data Rich  | 1         | 1     | Cumulative Cigarettes (15 Years)                    | 163             |
| Nasopharynx cancer         | Female | 5-9 years   | 95+ years | Data Rich  | 1         | 1     | Log-transformed SEV scalar: Nasoph C                | 167             |
| Nasopharynx cancer         | Female | 5-9 years   | 95+ years | Data Rich  | 1         | 1     | Smoking Prevalence                                  | 286             |
| Nasopharynx cancer         | Female | 5-9 years   | 95+ years | Data Rich  | 1         | 1     | Cumulative Cigarettes (5 Years)                     | 295             |
| Nasopharynx cancer         | Female | 5-9 years   | 95+ years | Data Rich  | 1         | 1     | Cumulative Cigarettes (20 Years)                    | 738             |
| Nasopharynx cancer         | Female | 5-9 years   | 95+ years | Data Rich  | 1         | 1     | Alcohol (liters per capita)                         | --              |
| Nasopharynx cancer         | Female | 5-9 years   | 95+ years | Data Rich  | -1        | 2     | Healthcare access and quality index                 | 0               |
| Nasopharynx cancer         | Female | 5-9 years   | 95+ years | Data Rich  | -1        | 2     | fruits adjusted(g)                                  | 0               |
| Nasopharynx cancer         | Female | 5-9 years   | 95+ years | Data Rich  | -1        | 2     | vegetables adjusted(g)                              | 0               |
| Nasopharynx cancer         | Female | 5-9 years   | 95+ years | Data Rich  | 1         | 2     | Population Density (over 1000 ppl/sqkm, proportion) | 1               |
| Nasopharynx cancer         | Female | 5-9 years   | 95+ years | Data Rich  | 1         | 2     | Population Density (under 150 ppl/sqkm, proportion) | --              |
| Nasopharynx cancer         | Female | 5-9 years   | 95+ years | Data Rich  | -1        | 3     | Education (years per capita)                        | 0               |
| Nasopharynx cancer         | Female | 5-9 years   | 95+ years | Data Rich  | 0         | 3     | Socio-demographic Index                             | 608             |
| Nasopharynx cancer         | Female | 5-9 years   | 95+ years | Data Rich  | 0         | 3     | LDI (1\$ per capita)                                | --              |
| Nasopharynx cancer         | Female | 5-9 years   | 95+ years | Global     | 1         | 1     | Tobacco (cigarettes per capita)                     | 39              |
| Nasopharynx cancer         | Female | 5-9 years   | 95+ years | Global     | 1         | 1     | Smoking Prevalence                                  | 57              |
| Nasopharynx cancer         | Female | 5-9 years   | 95+ years | Global     | 1         | 1     | Cumulative Cigarettes (10 Years)                    | 200             |
| Nasopharynx cancer         | Female | 5-9 years   | 95+ years | Global     | 1         | 1     | Cumulative Cigarettes (20 Years)                    | 212             |
| Nasopharynx cancer         | Female | 5-9 years   | 95+ years | Global     | 1         | 1     | Cumulative Cigarettes (5 Years)                     | 237             |
| Nasopharynx cancer         | Female | 5-9 years   | 95+ years | Global     | 1         | 1     | Cumulative Cigarettes (15 Years)                    | 311             |
| Nasopharynx cancer         | Female | 5-9 years   | 95+ years | Global     | 1         | 1     | Log-transformed SEV scalar: Nasoph C                | 394             |
| Nasopharynx cancer         | Female | 5-9 years   | 95+ years | Global     | 1         | 1     | Alcohol (liters per capita)                         | --              |
| Nasopharynx cancer         | Female | 5-9 years   | 95+ years | Global     | -1        | 2     | fruits adjusted(g)                                  | 0               |
| Nasopharynx cancer         | Female | 5-9 years   | 95+ years | Global     | -1        | 2     | Healthcare access and quality index                 | 40              |
| Nasopharynx cancer         | Female | 5-9 years   | 95+ years | Global     | -1        | 2     | vegetables adjusted(g)                              | 449             |
| Nasopharynx cancer         | Female | 5-9 years   | 95+ years | Global     | 1         | 2     | Population Density (over 1000 ppl/sqkm, proportion) | 496             |



**Appendix Table 9: CODEm covariates used, level of covariate, and expected direction of covariate by cause, sex, and age**

*Covariates that CODEm did not select during the covariate selection process have no draw counts listed.*

| Cause                | Sex    | Age Start   | Age End   | Model Type | Direction | Level | Covariate Name                                      | Number of Draws |
|----------------------|--------|-------------|-----------|------------|-----------|-------|-----------------------------------------------------|-----------------|
| Nasopharynx cancer   | Female | 5-9 years   | 95+ years | Global     | 1         | 2     | Population Density (under 150 ppl/sqkm, proportion) | --              |
| Nasopharynx cancer   | Female | 5-9 years   | 95+ years | Global     | -1        | 3     | Education (years per capita)                        | 0               |
| Nasopharynx cancer   | Female | 5-9 years   | 95+ years | Global     | 0         | 3     | Socio-demographic Index                             | 223             |
| Nasopharynx cancer   | Female | 5-9 years   | 95+ years | Global     | 0         | 3     | LDI (IS per capita)                                 | --              |
| Nasopharynx cancer   | Male   | 5-9 years   | 95+ years | Data Rich  | 1         | 1     | Cumulative Cigarettes (15 Years)                    | 4               |
| Nasopharynx cancer   | Male   | 5-9 years   | 95+ years | Data Rich  | 1         | 1     | Smoking Prevalence                                  | 10              |
| Nasopharynx cancer   | Male   | 5-9 years   | 95+ years | Data Rich  | 1         | 1     | Cumulative Cigarettes (5 Years)                     | 12              |
| Nasopharynx cancer   | Male   | 5-9 years   | 95+ years | Data Rich  | 1         | 1     | Cumulative Cigarettes (10 Years)                    | 81              |
| Nasopharynx cancer   | Male   | 5-9 years   | 95+ years | Data Rich  | 1         | 1     | Tobacco (cigarettes per capita)                     | 110             |
| Nasopharynx cancer   | Male   | 5-9 years   | 95+ years | Data Rich  | 1         | 1     | Cumulative Cigarettes (20 Years)                    | 332             |
| Nasopharynx cancer   | Male   | 5-9 years   | 95+ years | Data Rich  | 1         | 1     | Alcohol (liters per capita)                         | --              |
| Nasopharynx cancer   | Male   | 5-9 years   | 95+ years | Data Rich  | 1         | 1     | Log-transformed SEV scalar: Nasoph C                | --              |
| Nasopharynx cancer   | Male   | 5-9 years   | 95+ years | Data Rich  | -1        | 2     | Healthcare access and quality index                 | 27              |
| Nasopharynx cancer   | Male   | 5-9 years   | 95+ years | Data Rich  | -1        | 2     | fruits adjusted(g)                                  | 193             |
| Nasopharynx cancer   | Male   | 5-9 years   | 95+ years | Data Rich  | -1        | 2     | vegetables adjusted(g)                              | 257             |
| Nasopharynx cancer   | Male   | 5-9 years   | 95+ years | Data Rich  | 1         | 2     | Population Density (over 1000 ppl/sqkm, proportion) | 532             |
| Nasopharynx cancer   | Male   | 5-9 years   | 95+ years | Data Rich  | 1         | 2     | Population Density (under 150 ppl/sqkm, proportion) | --              |
| Nasopharynx cancer   | Male   | 5-9 years   | 95+ years | Data Rich  | -1        | 3     | Education (years per capita)                        | 27              |
| Nasopharynx cancer   | Male   | 5-9 years   | 95+ years | Data Rich  | 0         | 3     | Socio-demographic Index                             | 46              |
| Nasopharynx cancer   | Male   | 5-9 years   | 95+ years | Data Rich  | 0         | 3     | LDI (IS per capita)                                 | --              |
| Nasopharynx cancer   | Male   | 5-9 years   | 95+ years | Global     | 1         | 1     | Cumulative Cigarettes (5 Years)                     | 0               |
| Nasopharynx cancer   | Male   | 5-9 years   | 95+ years | Global     | 1         | 1     | Tobacco (cigarettes per capita)                     | 5               |
| Nasopharynx cancer   | Male   | 5-9 years   | 95+ years | Global     | 1         | 1     | Cumulative Cigarettes (20 Years)                    | 84              |
| Nasopharynx cancer   | Male   | 5-9 years   | 95+ years | Global     | 1         | 1     | Cumulative Cigarettes (10 Years)                    | 87              |
| Nasopharynx cancer   | Male   | 5-9 years   | 95+ years | Global     | 1         | 1     | Log-transformed SEV scalar: Nasoph C                | 138             |
| Nasopharynx cancer   | Male   | 5-9 years   | 95+ years | Global     | 1         | 1     | Cumulative Cigarettes (15 Years)                    | 189             |
| Nasopharynx cancer   | Male   | 5-9 years   | 95+ years | Global     | 1         | 1     | Smoking Prevalence                                  | 241             |
| Nasopharynx cancer   | Male   | 5-9 years   | 95+ years | Global     | 1         | 1     | Alcohol (liters per capita)                         | 650             |
| Nasopharynx cancer   | Male   | 5-9 years   | 95+ years | Global     | -1        | 2     | fruits adjusted(g)                                  | 50              |
| Nasopharynx cancer   | Male   | 5-9 years   | 95+ years | Global     | -1        | 2     | Healthcare access and quality index                 | 360             |
| Nasopharynx cancer   | Male   | 5-9 years   | 95+ years | Global     | -1        | 2     | vegetables adjusted(g)                              | 602             |
| Nasopharynx cancer   | Male   | 5-9 years   | 95+ years | Global     | 1         | 2     | Population Density (over 1000 ppl/sqkm, proportion) | 311             |
| Nasopharynx cancer   | Male   | 5-9 years   | 95+ years | Global     | 1         | 2     | Population Density (under 150 ppl/sqkm, proportion) | --              |
| Nasopharynx cancer   | Male   | 5-9 years   | 95+ years | Global     | -1        | 3     | Education (years per capita)                        | 129             |
| Nasopharynx cancer   | Male   | 5-9 years   | 95+ years | Global     | 0         | 3     | Socio-demographic Index                             | 278             |
| Nasopharynx cancer   | Male   | 5-9 years   | 95+ years | Global     | 0         | 3     | LDI (IS per capita)                                 | --              |
| Other pharynx cancer | Female | 15-19 years | 95+ years | Data Rich  | 1         | 1     | Log-transformed SEV scalar: Oth Phar C              | 94              |
| Other pharynx cancer | Female | 15-19 years | 95+ years | Data Rich  | 1         | 1     | Alcohol (liters per capita)                         | 225             |
| Other pharynx cancer | Female | 15-19 years | 95+ years | Data Rich  | 1         | 1     | Smoking Prevalence                                  | --              |
| Other pharynx cancer | Female | 15-19 years | 95+ years | Data Rich  | -1        | 2     | Healthcare access and quality index                 | 189             |
| Other pharynx cancer | Female | 15-19 years | 95+ years | Data Rich  | -1        | 2     | vegetables adjusted(g)                              | 236             |
| Other pharynx cancer | Female | 15-19 years | 95+ years | Data Rich  | -1        | 2     | fruits adjusted(g)                                  | --              |
| Other pharynx cancer | Female | 15-19 years | 95+ years | Data Rich  | 1         | 2     | Population Density (over 1000 ppl/sqkm, proportion) | 309             |
| Other pharynx cancer | Female | 15-19 years | 95+ years | Data Rich  | 1         | 2     | Cumulative Cigarettes (5 Years)                     | --              |
| Other pharynx cancer | Female | 15-19 years | 95+ years | Data Rich  | 1         | 2     | Population Density (under 150 ppl/sqkm, proportion) | --              |
| Other pharynx cancer | Female | 15-19 years | 95+ years | Data Rich  | -1        | 3     | Education (years per capita)                        | 97              |
| Other pharynx cancer | Female | 15-19 years | 95+ years | Data Rich  | 0         | 3     | Socio-demographic Index                             | 271             |
| Other pharynx cancer | Female | 15-19 years | 95+ years | Data Rich  | 0         | 3     | LDI (IS per capita)                                 | --              |
| Other pharynx cancer | Female | 15-19 years | 95+ years | Global     | 1         | 1     | Smoking Prevalence                                  | 170             |
| Other pharynx cancer | Female | 15-19 years | 95+ years | Global     | 1         | 1     | Log-transformed SEV scalar: Oth Phar C              | 271             |
| Other pharynx cancer | Female | 15-19 years | 95+ years | Global     | 1         | 1     | Alcohol (liters per capita)                         | 729             |
| Other pharynx cancer | Female | 15-19 years | 95+ years | Global     | -1        | 2     | fruits adjusted(g)                                  | 17              |
| Other pharynx cancer | Female | 15-19 years | 95+ years | Global     | -1        | 2     | vegetables adjusted(g)                              | 125             |
| Other pharynx cancer | Female | 15-19 years | 95+ years | Global     | -1        | 2     | Healthcare access and quality index                 | 205             |
| Other pharynx cancer | Female | 15-19 years | 95+ years | Global     | 1         | 2     | Cumulative Cigarettes (5 Years)                     | 144             |
| Other pharynx cancer | Female | 15-19 years | 95+ years | Global     | 1         | 2     | Population Density (over 1000 ppl/sqkm, proportion) | 636             |
| Other pharynx cancer | Female | 15-19 years | 95+ years | Global     | 1         | 2     | Population Density (under 150 ppl/sqkm, proportion) | --              |
| Other pharynx cancer | Female | 15-19 years | 95+ years | Global     | -1        | 3     | Education (years per capita)                        | 61              |
| Other pharynx cancer | Female | 15-19 years | 95+ years | Global     | 0         | 3     | Socio-demographic Index                             | 315             |
| Other pharynx cancer | Female | 15-19 years | 95+ years | Global     | 0         | 3     | LDI (IS per capita)                                 | --              |
| Other pharynx cancer | Male   | 15-19 years | 95+ years | Data Rich  | 1         | 1     | Log-transformed SEV scalar: Oth Phar C              | 335             |
| Other pharynx cancer | Male   | 15-19 years | 95+ years | Data Rich  | 1         | 1     | Alcohol (liters per capita)                         | 799             |
| Other pharynx cancer | Male   | 15-19 years | 95+ years | Data Rich  | 1         | 1     | Smoking Prevalence                                  | --              |
| Other pharynx cancer | Male   | 15-19 years | 95+ years | Data Rich  | -1        | 2     | Healthcare access and quality index                 | --              |
| Other pharynx cancer | Male   | 15-19 years | 95+ years | Data Rich  | -1        | 2     | fruits adjusted(g)                                  | --              |
| Other pharynx cancer | Male   | 15-19 years | 95+ years | Data Rich  | -1        | 2     | vegetables adjusted(g)                              | --              |
| Other pharynx cancer | Male   | 15-19 years | 95+ years | Data Rich  | 1         | 2     | Population Density (over 1000 ppl/sqkm, proportion) | 423             |
| Other pharynx cancer | Male   | 15-19 years | 95+ years | Data Rich  | 1         | 2     | Cumulative Cigarettes (5 Years)                     | --              |
| Other pharynx cancer | Male   | 15-19 years | 95+ years | Data Rich  | 1         | 2     | Population Density (under 150 ppl/sqkm, proportion) | --              |
| Other pharynx cancer | Male   | 15-19 years | 95+ years | Data Rich  | -1        | 3     | Education (years per capita)                        | --              |
| Other pharynx cancer | Male   | 15-19 years | 95+ years | Data Rich  | 0         | 3     | Socio-demographic Index                             | 406             |
| Other pharynx cancer | Male   | 15-19 years | 95+ years | Data Rich  | 0         | 3     | LDI (IS per capita)                                 | --              |
| Other pharynx cancer | Male   | 15-19 years | 95+ years | Global     | 1         | 1     | Log-transformed SEV scalar: Oth Phar C              | 676             |
| Other pharynx cancer | Male   | 15-19 years | 95+ years | Global     | 1         | 1     | Alcohol (liters per capita)                         | 784             |
| Other pharynx cancer | Male   | 15-19 years | 95+ years | Global     | 1         | 1     | Smoking Prevalence                                  | --              |
| Other pharynx cancer | Male   | 15-19 years | 95+ years | Global     | -1        | 2     | Healthcare access and quality index                 | --              |
| Other pharynx cancer | Male   | 15-19 years | 95+ years | Global     | -1        | 2     | fruits adjusted(g)                                  | --              |
| Other pharynx cancer | Male   | 15-19 years | 95+ years | Global     | -1        | 2     | vegetables adjusted(g)                              | --              |

**Appendix Table 9: CODEm covariates used, level of covariate, and expected direction of covariate by cause, sex, and age**

*Covariates that CODEm did not select during the covariate selection process have no draw counts listed.*

| Cause                | Sex    | Age Start   | Age End   | Model Type | Direction | Level | Covariate Name                                         | Number of Draws |
|----------------------|--------|-------------|-----------|------------|-----------|-------|--------------------------------------------------------|-----------------|
| Other pharynx cancer | Male   | 15-19 years | 95+ years | Global     | 1         | 2     | Population Density (over 1000 ppl/sqkm, proportion)    | 276             |
| Other pharynx cancer | Male   | 15-19 years | 95+ years | Global     | 1         | 2     | Cumulative Cigarettes (5 Years)                        | --              |
| Other pharynx cancer | Male   | 15-19 years | 95+ years | Global     | 1         | 2     | Population Density (under 150 ppl/sqkm, proportion)    | --              |
| Other pharynx cancer | Male   | 15-19 years | 95+ years | Global     | -1        | 3     | Education (years per capita)                           | --              |
| Other pharynx cancer | Male   | 15-19 years | 95+ years | Global     | 0         | 3     | Socio-demographic Index                                | 198             |
| Other pharynx cancer | Male   | 15-19 years | 95+ years | Global     | 0         | 3     | LDI (1\$ per capita)                                   | --              |
| Oesophageal cancer   | Female | 15-19 years | 95+ years | Data Rich  | -1        | 1     | fruits adjusted(g)                                     | --              |
| Oesophageal cancer   | Female | 15-19 years | 95+ years | Data Rich  | 1         | 1     | Smoking Prevalence                                     | 0               |
| Oesophageal cancer   | Female | 15-19 years | 95+ years | Data Rich  | 1         | 1     | Tobacco (cigarettes per capita)                        | 0               |
| Oesophageal cancer   | Female | 15-19 years | 95+ years | Data Rich  | 1         | 1     | Mean BMI                                               | 62              |
| Oesophageal cancer   | Female | 15-19 years | 95+ years | Data Rich  | 1         | 1     | Log-transformed age-standardized SEV scalar: Esophag C | 300             |
| Oesophageal cancer   | Female | 15-19 years | 95+ years | Data Rich  | 1         | 1     | Alcohol (liters per capita)                            | 833             |
| Oesophageal cancer   | Female | 15-19 years | 95+ years | Data Rich  | 1         | 1     | Log-transformed SEV scalar: Esophag C                  | --              |
| Oesophageal cancer   | Female | 15-19 years | 95+ years | Data Rich  | -1        | 2     | Healthcare access and quality index                    | 0               |
| Oesophageal cancer   | Female | 15-19 years | 95+ years | Data Rich  | -1        | 2     | Improved Water Source (proportion with access)         | 0               |
| Oesophageal cancer   | Female | 15-19 years | 95+ years | Data Rich  | -1        | 2     | vegetables adjusted(g)                                 | 7               |
| Oesophageal cancer   | Female | 15-19 years | 95+ years | Data Rich  | -1        | 2     | Sanitation (proportion with access)                    | 379             |
| Oesophageal cancer   | Female | 15-19 years | 95+ years | Data Rich  | 1         | 2     | Indoor Air Pollution (All Cooking Fuels)               | 77              |
| Oesophageal cancer   | Female | 15-19 years | 95+ years | Data Rich  | -1        | 3     | Education (years per capita)                           | 0               |
| Oesophageal cancer   | Female | 15-19 years | 95+ years | Data Rich  | 0         | 3     | Socio-demographic Index                                | 357             |
| Oesophageal cancer   | Female | 15-19 years | 95+ years | Data Rich  | 0         | 3     | LDI (1\$ per capita)                                   | --              |
| Oesophageal cancer   | Female | 15-19 years | 95+ years | Global     | -1        | 1     | fruits adjusted(g)                                     | 313             |
| Oesophageal cancer   | Female | 15-19 years | 95+ years | Global     | 1         | 1     | Smoking Prevalence                                     | 43              |
| Oesophageal cancer   | Female | 15-19 years | 95+ years | Global     | 1         | 1     | Tobacco (cigarettes per capita)                        | 53              |
| Oesophageal cancer   | Female | 15-19 years | 95+ years | Global     | 1         | 1     | Log-transformed age-standardized SEV scalar: Esophag C | 97              |
| Oesophageal cancer   | Female | 15-19 years | 95+ years | Global     | 1         | 1     | Alcohol (liters per capita)                            | 538             |
| Oesophageal cancer   | Female | 15-19 years | 95+ years | Global     | 1         | 1     | Mean BMI                                               | 685             |
| Oesophageal cancer   | Female | 15-19 years | 95+ years | Global     | 1         | 1     | Log-transformed SEV scalar: Esophag C                  | --              |
| Oesophageal cancer   | Female | 15-19 years | 95+ years | Global     | -1        | 2     | Improved Water Source (proportion with access)         | 0               |
| Oesophageal cancer   | Female | 15-19 years | 95+ years | Global     | -1        | 2     | Healthcare access and quality index                    | 57              |
| Oesophageal cancer   | Female | 15-19 years | 95+ years | Global     | -1        | 2     | vegetables adjusted(g)                                 | 207             |
| Oesophageal cancer   | Female | 15-19 years | 95+ years | Global     | -1        | 2     | Sanitation (proportion with access)                    | 442             |
| Oesophageal cancer   | Female | 15-19 years | 95+ years | Global     | 1         | 2     | Indoor Air Pollution (All Cooking Fuels)               | 431             |
| Oesophageal cancer   | Female | 15-19 years | 95+ years | Global     | -1        | 3     | Education (years per capita)                           | 170             |
| Oesophageal cancer   | Female | 15-19 years | 95+ years | Global     | 0         | 3     | Socio-demographic Index                                | 488             |
| Oesophageal cancer   | Female | 15-19 years | 95+ years | Global     | 0         | 3     | LDI (1\$ per capita)                                   | --              |
| Oesophageal cancer   | Male   | 15-19 years | 95+ years | Data Rich  | -1        | 1     | fruits adjusted(g)                                     | --              |
| Oesophageal cancer   | Male   | 15-19 years | 95+ years | Data Rich  | 1         | 1     | Tobacco (cigarettes per capita)                        | 3               |
| Oesophageal cancer   | Male   | 15-19 years | 95+ years | Data Rich  | 1         | 1     | Log-transformed SEV scalar: Esophag C                  | 5               |
| Oesophageal cancer   | Male   | 15-19 years | 95+ years | Data Rich  | 1         | 1     | Smoking Prevalence                                     | 7               |
| Oesophageal cancer   | Male   | 15-19 years | 95+ years | Data Rich  | 1         | 1     | Log-transformed age-standardized SEV scalar: Esophag C | 21              |
| Oesophageal cancer   | Male   | 15-19 years | 95+ years | Data Rich  | 1         | 1     | Alcohol (liters per capita)                            | 147             |
| Oesophageal cancer   | Male   | 15-19 years | 95+ years | Data Rich  | 1         | 1     | Mean BMI                                               | 981             |
| Oesophageal cancer   | Male   | 15-19 years | 95+ years | Data Rich  | -1        | 2     | Healthcare access and quality index                    | 1               |
| Oesophageal cancer   | Male   | 15-19 years | 95+ years | Data Rich  | -1        | 2     | vegetables adjusted(g)                                 | 288             |
| Oesophageal cancer   | Male   | 15-19 years | 95+ years | Data Rich  | -1        | 2     | Sanitation (proportion with access)                    | 460             |
| Oesophageal cancer   | Male   | 15-19 years | 95+ years | Data Rich  | -1        | 2     | Improved Water Source (proportion with access)         | --              |
| Oesophageal cancer   | Male   | 15-19 years | 95+ years | Data Rich  | 1         | 2     | Indoor Air Pollution (All Cooking Fuels)               | 305             |
| Oesophageal cancer   | Male   | 15-19 years | 95+ years | Data Rich  | -1        | 3     | Education (years per capita)                           | 0               |
| Oesophageal cancer   | Male   | 15-19 years | 95+ years | Data Rich  | 0         | 3     | Socio-demographic Index                                | 547             |
| Oesophageal cancer   | Male   | 15-19 years | 95+ years | Data Rich  | 0         | 3     | LDI (1\$ per capita)                                   | --              |
| Oesophageal cancer   | Male   | 15-19 years | 95+ years | Global     | -1        | 1     | fruits adjusted(g)                                     | 259             |
| Oesophageal cancer   | Male   | 15-19 years | 95+ years | Global     | 1         | 1     | Log-transformed SEV scalar: Esophag C                  | 0               |
| Oesophageal cancer   | Male   | 15-19 years | 95+ years | Global     | 1         | 1     | Smoking Prevalence                                     | 0               |
| Oesophageal cancer   | Male   | 15-19 years | 95+ years | Global     | 1         | 1     | Tobacco (cigarettes per capita)                        | 0               |
| Oesophageal cancer   | Male   | 15-19 years | 95+ years | Global     | 1         | 1     | Alcohol (liters per capita)                            | 196             |
| Oesophageal cancer   | Male   | 15-19 years | 95+ years | Global     | 1         | 1     | Log-transformed age-standardized SEV scalar: Esophag C | 274             |
| Oesophageal cancer   | Male   | 15-19 years | 95+ years | Global     | 1         | 1     | Mean BMI                                               | 999             |
| Oesophageal cancer   | Male   | 15-19 years | 95+ years | Global     | -1        | 2     | Healthcare access and quality index                    | 0               |
| Oesophageal cancer   | Male   | 15-19 years | 95+ years | Global     | -1        | 2     | Improved Water Source (proportion with access)         | 0               |
| Oesophageal cancer   | Male   | 15-19 years | 95+ years | Global     | -1        | 2     | vegetables adjusted(g)                                 | 344             |
| Oesophageal cancer   | Male   | 15-19 years | 95+ years | Global     | -1        | 2     | Sanitation (proportion with access)                    | 447             |
| Oesophageal cancer   | Male   | 15-19 years | 95+ years | Global     | 1         | 2     | Indoor Air Pollution (All Cooking Fuels)               | 379             |
| Oesophageal cancer   | Male   | 15-19 years | 95+ years | Global     | -1        | 3     | Education (years per capita)                           | 0               |
| Oesophageal cancer   | Male   | 15-19 years | 95+ years | Global     | 0         | 3     | Socio-demographic Index                                | 583             |
| Oesophageal cancer   | Male   | 15-19 years | 95+ years | Global     | 0         | 3     | LDI (1\$ per capita)                                   | --              |
| Stomach cancer       | Female | 15-19 years | 95+ years | Data Rich  | 1         | 1     | Smoking Prevalence                                     | 0               |
| Stomach cancer       | Female | 15-19 years | 95+ years | Data Rich  | 1         | 1     | SEV unsafe water                                       | 6               |
| Stomach cancer       | Female | 15-19 years | 95+ years | Data Rich  | 1         | 1     | Cumulative Cigarettes (5 Years)                        | 15              |
| Stomach cancer       | Female | 15-19 years | 95+ years | Data Rich  | 1         | 1     | Cumulative Cigarettes (15 Years)                       | 54              |
| Stomach cancer       | Female | 15-19 years | 95+ years | Data Rich  | 1         | 1     | SEV unsafe sanitation                                  | 178             |
| Stomach cancer       | Female | 15-19 years | 95+ years | Data Rich  | 1         | 1     | Log-transformed SEV scalar: Stomach C                  | 183             |
| Stomach cancer       | Female | 15-19 years | 95+ years | Data Rich  | 1         | 1     | Cumulative Cigarettes (10 Years)                       | 215             |
| Stomach cancer       | Female | 15-19 years | 95+ years | Data Rich  | 1         | 1     | Tobacco (cigarettes per capita)                        | 367             |
| Stomach cancer       | Female | 15-19 years | 95+ years | Data Rich  | 1         | 1     | Cumulative Cigarettes (20 Years)                       | 368             |
| Stomach cancer       | Female | 15-19 years | 95+ years | Data Rich  | 1         | 1     | Diet high in sodium                                    | --              |
| Stomach cancer       | Female | 15-19 years | 95+ years | Data Rich  | -1        | 2     | fruits adjusted(g)                                     | 20              |
| Stomach cancer       | Female | 15-19 years | 95+ years | Data Rich  | -1        | 2     | vegetables adjusted(g)                                 | 23              |



**Appendix Table 9: CODEm covariates used, level of covariate, and expected direction of covariate by cause, sex, and age**

*Covariates that CODEm did not select during the covariate selection process have no draw counts listed.*

| Cause                   | Sex    | Age Start   | Age End   | Model Type | Direction | Level | Covariate Name                                           | Number of Draws |
|-------------------------|--------|-------------|-----------|------------|-----------|-------|----------------------------------------------------------|-----------------|
| Stomach cancer          | Female | 15-19 years | 95+ years | Data Rich  | -1        | 2     | Healthcare access and quality index                      | 27              |
| Stomach cancer          | Female | 15-19 years | 95+ years | Data Rich  | -1        | 2     | Sanitation (proportion with access)                      | 152             |
| Stomach cancer          | Female | 15-19 years | 95+ years | Data Rich  | -1        | 2     | Improved Water Source (proportion with access)           | 153             |
| Stomach cancer          | Female | 15-19 years | 95+ years | Data Rich  | 1         | 2     | Mean BMI                                                 | --              |
| Stomach cancer          | Female | 15-19 years | 95+ years | Data Rich  | -1        | 3     | Education (years per capita)                             | 699             |
| Stomach cancer          | Female | 15-19 years | 95+ years | Data Rich  | 0         | 3     | Socio-demographic Index                                  | 551             |
| Stomach cancer          | Female | 15-19 years | 95+ years | Data Rich  | 0         | 3     | LDI (I\$ per capita)                                     | --              |
| Stomach cancer          | Female | 15-19 years | 95+ years | Global     | 1         | 1     | Cumulative Cigarettes (5 Years)                          | 0               |
| Stomach cancer          | Female | 15-19 years | 95+ years | Global     | 1         | 1     | Smoking Prevalence                                       | 0               |
| Stomach cancer          | Female | 15-19 years | 95+ years | Global     | 1         | 1     | Cumulative Cigarettes (10 Years)                         | 2               |
| Stomach cancer          | Female | 15-19 years | 95+ years | Global     | 1         | 1     | SEV unsafe sanitation                                    | 69              |
| Stomach cancer          | Female | 15-19 years | 95+ years | Global     | 1         | 1     | SEV unsafe water                                         | 85              |
| Stomach cancer          | Female | 15-19 years | 95+ years | Global     | 1         | 1     | Log-transformed SEV scalar: Stomach C                    | 127             |
| Stomach cancer          | Female | 15-19 years | 95+ years | Global     | 1         | 1     | Cumulative Cigarettes (15 Years)                         | 281             |
| Stomach cancer          | Female | 15-19 years | 95+ years | Global     | 1         | 1     | Cumulative Cigarettes (20 Years)                         | 367             |
| Stomach cancer          | Female | 15-19 years | 95+ years | Global     | 1         | 1     | Diet high in sodium                                      | 769             |
| Stomach cancer          | Female | 15-19 years | 95+ years | Global     | 1         | 1     | Tobacco (cigarettes per capita)                          | 946             |
| Stomach cancer          | Female | 15-19 years | 95+ years | Global     | -1        | 2     | fruits adjusted(g)                                       | 1               |
| Stomach cancer          | Female | 15-19 years | 95+ years | Global     | -1        | 2     | Sanitation (proportion with access)                      | 12              |
| Stomach cancer          | Female | 15-19 years | 95+ years | Global     | -1        | 2     | Improved Water Source (proportion with access)           | 19              |
| Stomach cancer          | Female | 15-19 years | 95+ years | Global     | -1        | 2     | Healthcare access and quality index                      | 28              |
| Stomach cancer          | Female | 15-19 years | 95+ years | Global     | -1        | 2     | vegetables adjusted(g)                                   | 129             |
| Stomach cancer          | Female | 15-19 years | 95+ years | Global     | 1         | 2     | Mean BMI                                                 | --              |
| Stomach cancer          | Female | 15-19 years | 95+ years | Global     | -1        | 3     | Education (years per capita)                             | 38              |
| Stomach cancer          | Female | 15-19 years | 95+ years | Global     | 0         | 3     | Socio-demographic Index                                  | 234             |
| Stomach cancer          | Female | 15-19 years | 95+ years | Global     | 0         | 3     | LDI (I\$ per capita)                                     | --              |
| Stomach cancer          | Male   | 15-19 years | 95+ years | Data Rich  | 1         | 1     | SEV unsafe water                                         | 0               |
| Stomach cancer          | Male   | 15-19 years | 95+ years | Data Rich  | 1         | 1     | Cumulative Cigarettes (20 Years)                         | 22              |
| Stomach cancer          | Male   | 15-19 years | 95+ years | Data Rich  | 1         | 1     | SEV unsafe sanitation                                    | 33              |
| Stomach cancer          | Male   | 15-19 years | 95+ years | Data Rich  | 1         | 1     | Cumulative Cigarettes (15 Years)                         | 99              |
| Stomach cancer          | Male   | 15-19 years | 95+ years | Data Rich  | 1         | 1     | Cumulative Cigarettes (10 Years)                         | 105             |
| Stomach cancer          | Male   | 15-19 years | 95+ years | Data Rich  | 1         | 1     | Tobacco (cigarettes per capita)                          | 185             |
| Stomach cancer          | Male   | 15-19 years | 95+ years | Data Rich  | 1         | 1     | Smoking Prevalence                                       | 297             |
| Stomach cancer          | Male   | 15-19 years | 95+ years | Data Rich  | 1         | 1     | Cumulative Cigarettes (5 Years)                          | 452             |
| Stomach cancer          | Male   | 15-19 years | 95+ years | Data Rich  | 1         | 1     | Log-transformed SEV scalar: Stomach C                    | 617             |
| Stomach cancer          | Male   | 15-19 years | 95+ years | Data Rich  | 1         | 1     | Diet high in sodium                                      | --              |
| Stomach cancer          | Male   | 15-19 years | 95+ years | Data Rich  | -1        | 2     | Healthcare access and quality index                      | 14              |
| Stomach cancer          | Male   | 15-19 years | 95+ years | Data Rich  | -1        | 2     | fruits adjusted(g)                                       | 14              |
| Stomach cancer          | Male   | 15-19 years | 95+ years | Data Rich  | -1        | 2     | Sanitation (proportion with access)                      | 138             |
| Stomach cancer          | Male   | 15-19 years | 95+ years | Data Rich  | -1        | 2     | vegetables adjusted(g)                                   | 183             |
| Stomach cancer          | Male   | 15-19 years | 95+ years | Data Rich  | -1        | 2     | Improved Water Source (proportion with access)           | 302             |
| Stomach cancer          | Male   | 15-19 years | 95+ years | Data Rich  | 1         | 2     | Mean BMI                                                 | --              |
| Stomach cancer          | Male   | 15-19 years | 95+ years | Data Rich  | -1        | 3     | Education (years per capita)                             | 751             |
| Stomach cancer          | Male   | 15-19 years | 95+ years | Data Rich  | 0         | 3     | Socio-demographic Index                                  | 868             |
| Stomach cancer          | Male   | 15-19 years | 95+ years | Data Rich  | 0         | 3     | LDI (I\$ per capita)                                     | --              |
| Stomach cancer          | Male   | 15-19 years | 95+ years | Global     | 1         | 1     | Cumulative Cigarettes (5 Years)                          | 87              |
| Stomach cancer          | Male   | 15-19 years | 95+ years | Global     | 1         | 1     | Diet high in sodium                                      | 180             |
| Stomach cancer          | Male   | 15-19 years | 95+ years | Global     | 1         | 1     | Smoking Prevalence                                       | 210             |
| Stomach cancer          | Male   | 15-19 years | 95+ years | Global     | 1         | 1     | SEV unsafe sanitation                                    | 217             |
| Stomach cancer          | Male   | 15-19 years | 95+ years | Global     | 1         | 1     | SEV unsafe water                                         | 231             |
| Stomach cancer          | Male   | 15-19 years | 95+ years | Global     | 1         | 1     | Cumulative Cigarettes (10 Years)                         | 235             |
| Stomach cancer          | Male   | 15-19 years | 95+ years | Global     | 1         | 1     | Cumulative Cigarettes (15 Years)                         | 268             |
| Stomach cancer          | Male   | 15-19 years | 95+ years | Global     | 1         | 1     | Cumulative Cigarettes (20 Years)                         | 385             |
| Stomach cancer          | Male   | 15-19 years | 95+ years | Global     | 1         | 1     | Log-transformed SEV scalar: Stomach C                    | 450             |
| Stomach cancer          | Male   | 15-19 years | 95+ years | Global     | 1         | 1     | Tobacco (cigarettes per capita)                          | 568             |
| Stomach cancer          | Male   | 15-19 years | 95+ years | Global     | -1        | 2     | vegetables adjusted(g)                                   | 39              |
| Stomach cancer          | Male   | 15-19 years | 95+ years | Global     | -1        | 2     | Sanitation (proportion with access)                      | 80              |
| Stomach cancer          | Male   | 15-19 years | 95+ years | Global     | -1        | 2     | fruits adjusted(g)                                       | 83              |
| Stomach cancer          | Male   | 15-19 years | 95+ years | Global     | -1        | 2     | Healthcare access and quality index                      | 221             |
| Stomach cancer          | Male   | 15-19 years | 95+ years | Global     | -1        | 2     | Improved Water Source (proportion with access)           | 223             |
| Stomach cancer          | Male   | 15-19 years | 95+ years | Global     | 1         | 2     | Mean BMI                                                 | --              |
| Stomach cancer          | Male   | 15-19 years | 95+ years | Global     | -1        | 3     | Education (years per capita)                             | 73              |
| Stomach cancer          | Male   | 15-19 years | 95+ years | Global     | 0         | 3     | Socio-demographic Index                                  | 108             |
| Stomach cancer          | Male   | 15-19 years | 95+ years | Global     | 0         | 3     | LDI (I\$ per capita)                                     | --              |
| Colon and rectum cancer | Female | 15-19 years | 95+ years | Data Rich  | -1        | 1     | Total Physical Activity (MET-min/week), Age-standardized | 7               |
| Colon and rectum cancer | Female | 15-19 years | 95+ years | Data Rich  | -1        | 1     | Total Physical Activity (MET-min/week), Age-specific     | 174             |
| Colon and rectum cancer | Female | 15-19 years | 95+ years | Data Rich  | 1         | 1     | Tobacco (cigarettes per capita)                          | 0               |
| Colon and rectum cancer | Female | 15-19 years | 95+ years | Data Rich  | 1         | 1     | Log-transformed SEV scalar: Colorect C                   | 79              |
| Colon and rectum cancer | Female | 15-19 years | 95+ years | Data Rich  | 1         | 1     | Smoking Prevalence                                       | 79              |
| Colon and rectum cancer | Female | 15-19 years | 95+ years | Data Rich  | 1         | 1     | Alcohol (liters per capita)                              | 137             |
| Colon and rectum cancer | Female | 15-19 years | 95+ years | Data Rich  | 1         | 1     | Mean BMI                                                 | 739             |
| Colon and rectum cancer | Female | 15-19 years | 95+ years | Data Rich  | 1         | 1     | red meats adjusted(g)                                    | 818             |
| Colon and rectum cancer | Female | 15-19 years | 95+ years | Data Rich  | -1        | 2     | Healthcare access and quality index                      | 0               |
| Colon and rectum cancer | Female | 15-19 years | 95+ years | Data Rich  | -1        | 2     | fruits adjusted(g)                                       | 0               |
| Colon and rectum cancer | Female | 15-19 years | 95+ years | Data Rich  | -1        | 2     | nuts seeds adjusted(g)                                   | 150             |
| Colon and rectum cancer | Female | 15-19 years | 95+ years | Data Rich  | -1        | 2     | pufa adjusted(percent)                                   | 257             |
| Colon and rectum cancer | Female | 15-19 years | 95+ years | Data Rich  | -1        | 2     | vegetables adjusted(g)                                   | 545             |
| Colon and rectum cancer | Female | 15-19 years | 95+ years | Data Rich  | -1        | 2     | milk adjusted(g)                                         | 594             |

**Appendix Table 9: CODEm covariates used, level of covariate, and expected direction of covariate by cause, sex, and age**

*Covariates that CODEm did not select during the covariate selection process have no draw counts listed.*

| Cause                   | Sex    | Age Start   | Age End   | Model Type | Direction | Level | Covariate Name                                           | Number of Draws |
|-------------------------|--------|-------------|-----------|------------|-----------|-------|----------------------------------------------------------|-----------------|
| Colon and rectum cancer | Female | 15-19 years | 95+ years | Data Rich  | -1        | 2     | fiber adjusted(g)                                        | 815             |
| Colon and rectum cancer | Female | 15-19 years | 95+ years | Data Rich  | -1        | 2     | calcium adjusted(g)                                      | --              |
| Colon and rectum cancer | Female | 15-19 years | 95+ years | Data Rich  | 1         | 2     | Cumulative Cigarettes (10 Years)                         | 21              |
| Colon and rectum cancer | Female | 15-19 years | 95+ years | Data Rich  | 1         | 2     | Diabetes Age-Specific Prevalence (proportion)            | 32              |
| Colon and rectum cancer | Female | 15-19 years | 95+ years | Data Rich  | 1         | 2     | Cumulative Cigarettes (5 Years)                          | 156             |
| Colon and rectum cancer | Female | 15-19 years | 95+ years | Data Rich  | 1         | 2     | Cumulative Cigarettes (15 Years)                         | 266             |
| Colon and rectum cancer | Female | 15-19 years | 95+ years | Data Rich  | 1         | 2     | Cumulative Cigarettes (20 Years)                         | 410             |
| Colon and rectum cancer | Female | 15-19 years | 95+ years | Data Rich  | 1         | 2     | Diabetes Fasting Plasma Glucose (mmol/L)                 | 592             |
| Colon and rectum cancer | Female | 15-19 years | 95+ years | Data Rich  | -1        | 3     | Education (years per capita)                             | 67              |
| Colon and rectum cancer | Female | 15-19 years | 95+ years | Data Rich  | 0         | 3     | Socio-demographic Index                                  | 0               |
| Colon and rectum cancer | Female | 15-19 years | 95+ years | Data Rich  | 0         | 3     | LDI (I\$ per capita)                                     | --              |
| Colon and rectum cancer | Female | 15-19 years | 95+ years | Global     | -1        | 1     | Total Physical Activity (MET-min/week), Age-specific     | 163             |
| Colon and rectum cancer | Female | 15-19 years | 95+ years | Global     | -1        | 1     | Total Physical Activity (MET-min/week), Age-standardized | 370             |
| Colon and rectum cancer | Female | 15-19 years | 95+ years | Global     | 1         | 1     | Mean BMI                                                 | 0               |
| Colon and rectum cancer | Female | 15-19 years | 95+ years | Global     | 1         | 1     | Tobacco (cigarettes per capita)                          | 78              |
| Colon and rectum cancer | Female | 15-19 years | 95+ years | Global     | 1         | 1     | Smoking Prevalence                                       | 84              |
| Colon and rectum cancer | Female | 15-19 years | 95+ years | Global     | 1         | 1     | Alcohol (liters per capita)                              | 242             |
| Colon and rectum cancer | Female | 15-19 years | 95+ years | Global     | 1         | 1     | red meats adjusted(g)                                    | 408             |
| Colon and rectum cancer | Female | 15-19 years | 95+ years | Global     | 1         | 1     | Log-transformed SEV scalar: Colorect C                   | 451             |
| Colon and rectum cancer | Female | 15-19 years | 95+ years | Global     | -1        | 2     | milk adjusted(g)                                         | 0               |
| Colon and rectum cancer | Female | 15-19 years | 95+ years | Global     | -1        | 2     | fruits adjusted(g)                                       | 4               |
| Colon and rectum cancer | Female | 15-19 years | 95+ years | Global     | -1        | 2     | vegetables adjusted(g)                                   | 17              |
| Colon and rectum cancer | Female | 15-19 years | 95+ years | Global     | -1        | 2     | calcium adjusted(g)                                      | 22              |
| Colon and rectum cancer | Female | 15-19 years | 95+ years | Global     | -1        | 2     | pufa adjusted(percent)                                   | 23              |
| Colon and rectum cancer | Female | 15-19 years | 95+ years | Global     | -1        | 2     | Healthcare access and quality index                      | 46              |
| Colon and rectum cancer | Female | 15-19 years | 95+ years | Global     | -1        | 2     | nuts seeds adjusted(g)                                   | 612             |
| Colon and rectum cancer | Female | 15-19 years | 95+ years | Global     | -1        | 2     | fiber adjusted(g)                                        | 961             |
| Colon and rectum cancer | Female | 15-19 years | 95+ years | Global     | 1         | 2     | Cumulative Cigarettes (5 Years)                          | 1               |
| Colon and rectum cancer | Female | 15-19 years | 95+ years | Global     | 1         | 2     | Cumulative Cigarettes (15 Years)                         | 215             |
| Colon and rectum cancer | Female | 15-19 years | 95+ years | Global     | 1         | 2     | Cumulative Cigarettes (20 Years)                         | 216             |
| Colon and rectum cancer | Female | 15-19 years | 95+ years | Global     | 1         | 2     | Cumulative Cigarettes (10 Years)                         | 244             |
| Colon and rectum cancer | Female | 15-19 years | 95+ years | Global     | 1         | 2     | Diabetes Fasting Plasma Glucose (mmol/L)                 | 291             |
| Colon and rectum cancer | Female | 15-19 years | 95+ years | Global     | 1         | 2     | Diabetes Age-Specific Prevalence (proportion)            | 654             |
| Colon and rectum cancer | Female | 15-19 years | 95+ years | Global     | -1        | 3     | Education (years per capita)                             | 262             |
| Colon and rectum cancer | Female | 15-19 years | 95+ years | Global     | 0         | 3     | Socio-demographic Index                                  | 498             |
| Colon and rectum cancer | Female | 15-19 years | 95+ years | Global     | 0         | 3     | LDI (I\$ per capita)                                     | --              |
| Colon and rectum cancer | Male   | 15-19 years | 95+ years | Data Rich  | -1        | 1     | Total Physical Activity (MET-min/week), Age-specific     | 42              |
| Colon and rectum cancer | Male   | 15-19 years | 95+ years | Data Rich  | -1        | 1     | Total Physical Activity (MET-min/week), Age-standardized | 199             |
| Colon and rectum cancer | Male   | 15-19 years | 95+ years | Data Rich  | 1         | 1     | Alcohol (liters per capita)                              | 0               |
| Colon and rectum cancer | Male   | 15-19 years | 95+ years | Data Rich  | 1         | 1     | Tobacco (cigarettes per capita)                          | 0               |
| Colon and rectum cancer | Male   | 15-19 years | 95+ years | Data Rich  | 1         | 1     | Smoking Prevalence                                       | 79              |
| Colon and rectum cancer | Male   | 15-19 years | 95+ years | Data Rich  | 1         | 1     | Mean BMI                                                 | 397             |
| Colon and rectum cancer | Male   | 15-19 years | 95+ years | Data Rich  | 1         | 1     | red meats adjusted(g)                                    | 401             |
| Colon and rectum cancer | Male   | 15-19 years | 95+ years | Data Rich  | 1         | 1     | Log-transformed SEV scalar: Colorect C                   | 463             |
| Colon and rectum cancer | Male   | 15-19 years | 95+ years | Data Rich  | -1        | 2     | Healthcare access and quality index                      | 0               |
| Colon and rectum cancer | Male   | 15-19 years | 95+ years | Data Rich  | -1        | 2     | fruits adjusted(g)                                       | 4               |
| Colon and rectum cancer | Male   | 15-19 years | 95+ years | Data Rich  | -1        | 2     | pufa adjusted(percent)                                   | 96              |
| Colon and rectum cancer | Male   | 15-19 years | 95+ years | Data Rich  | -1        | 2     | milk adjusted(g)                                         | 138             |
| Colon and rectum cancer | Male   | 15-19 years | 95+ years | Data Rich  | -1        | 2     | vegetables adjusted(g)                                   | 246             |
| Colon and rectum cancer | Male   | 15-19 years | 95+ years | Data Rich  | -1        | 2     | nuts seeds adjusted(g)                                   | 270             |
| Colon and rectum cancer | Male   | 15-19 years | 95+ years | Data Rich  | -1        | 2     | fiber adjusted(g)                                        | 436             |
| Colon and rectum cancer | Male   | 15-19 years | 95+ years | Data Rich  | -1        | 2     | calcium adjusted(g)                                      | --              |
| Colon and rectum cancer | Male   | 15-19 years | 95+ years | Data Rich  | 1         | 2     | Cumulative Cigarettes (5 Years)                          | 0               |
| Colon and rectum cancer | Male   | 15-19 years | 95+ years | Data Rich  | 1         | 2     | Cumulative Cigarettes (15 Years)                         | 4               |
| Colon and rectum cancer | Male   | 15-19 years | 95+ years | Data Rich  | 1         | 2     | Cumulative Cigarettes (10 Years)                         | 13              |
| Colon and rectum cancer | Male   | 15-19 years | 95+ years | Data Rich  | 1         | 2     | Diabetes Age-Specific Prevalence (proportion)            | 24              |
| Colon and rectum cancer | Male   | 15-19 years | 95+ years | Data Rich  | 1         | 2     | Cumulative Cigarettes (20 Years)                         | 317             |
| Colon and rectum cancer | Male   | 15-19 years | 95+ years | Data Rich  | 1         | 2     | Diabetes Fasting Plasma Glucose (mmol/L)                 | 544             |
| Colon and rectum cancer | Male   | 15-19 years | 95+ years | Data Rich  | -1        | 3     | Education (years per capita)                             | 0               |
| Colon and rectum cancer | Male   | 15-19 years | 95+ years | Data Rich  | 0         | 3     | Socio-demographic Index                                  | 515             |
| Colon and rectum cancer | Male   | 15-19 years | 95+ years | Data Rich  | 0         | 3     | LDI (I\$ per capita)                                     | --              |
| Colon and rectum cancer | Male   | 15-19 years | 95+ years | Global     | -1        | 1     | Total Physical Activity (MET-min/week), Age-standardized | 84              |
| Colon and rectum cancer | Male   | 15-19 years | 95+ years | Global     | -1        | 1     | Total Physical Activity (MET-min/week), Age-specific     | 107             |
| Colon and rectum cancer | Male   | 15-19 years | 95+ years | Global     | 1         | 1     | Alcohol (liters per capita)                              | 0               |
| Colon and rectum cancer | Male   | 15-19 years | 95+ years | Global     | 1         | 1     | Smoking Prevalence                                       | 57              |
| Colon and rectum cancer | Male   | 15-19 years | 95+ years | Global     | 1         | 1     | Tobacco (cigarettes per capita)                          | 77              |
| Colon and rectum cancer | Male   | 15-19 years | 95+ years | Global     | 1         | 1     | red meats adjusted(g)                                    | 504             |
| Colon and rectum cancer | Male   | 15-19 years | 95+ years | Global     | 1         | 1     | Log-transformed SEV scalar: Colorect C                   | 642             |
| Colon and rectum cancer | Male   | 15-19 years | 95+ years | Global     | 1         | 1     | Mean BMI                                                 | 709             |
| Colon and rectum cancer | Male   | 15-19 years | 95+ years | Global     | -1        | 2     | Healthcare access and quality index                      | 0               |
| Colon and rectum cancer | Male   | 15-19 years | 95+ years | Global     | -1        | 2     | fruits adjusted(g)                                       | 5               |
| Colon and rectum cancer | Male   | 15-19 years | 95+ years | Global     | -1        | 2     | nuts seeds adjusted(g)                                   | 157             |
| Colon and rectum cancer | Male   | 15-19 years | 95+ years | Global     | -1        | 2     | pufa adjusted(percent)                                   | 296             |
| Colon and rectum cancer | Male   | 15-19 years | 95+ years | Global     | -1        | 2     | milk adjusted(g)                                         | 364             |
| Colon and rectum cancer | Male   | 15-19 years | 95+ years | Global     | -1        | 2     | vegetables adjusted(g)                                   | 381             |
| Colon and rectum cancer | Male   | 15-19 years | 95+ years | Global     | -1        | 2     | fiber adjusted(g)                                        | 623             |
| Colon and rectum cancer | Male   | 15-19 years | 95+ years | Global     | -1        | 2     | calcium adjusted(g)                                      | --              |
| Colon and rectum cancer | Male   | 15-19 years | 95+ years | Global     | 1         | 2     | Cumulative Cigarettes (5 Years)                          | 0               |

**Appendix Table 9: CODEm covariates used, level of covariate, and expected direction of covariate by cause, sex, and age**

*Covariates that CODEm did not select during the covariate selection process have no draw counts listed.*

| Cause                   | Sex    | Age Start   | Age End   | Model Type | Direction | Level | Covariate Name                                               | Number of Draws |
|-------------------------|--------|-------------|-----------|------------|-----------|-------|--------------------------------------------------------------|-----------------|
| Colon and rectum cancer | Male   | 15-19 years | 95+ years | Global     | 1         | 2     | Diabetes Age-Specific Prevalence (proportion)                | 175             |
| Colon and rectum cancer | Male   | 15-19 years | 95+ years | Global     | 1         | 2     | Cumulative Cigarettes (10 Years)                             | 190             |
| Colon and rectum cancer | Male   | 15-19 years | 95+ years | Global     | 1         | 2     | Cumulative Cigarettes (20 Years)                             | 255             |
| Colon and rectum cancer | Male   | 15-19 years | 95+ years | Global     | 1         | 2     | Cumulative Cigarettes (15 Years)                             | 294             |
| Colon and rectum cancer | Male   | 15-19 years | 95+ years | Global     | 1         | 2     | Diabetes Fasting Plasma Glucose (mmol/L)                     | 878             |
| Colon and rectum cancer | Male   | 15-19 years | 95+ years | Global     | -1        | 3     | Education (years per capita)                                 | 0               |
| Colon and rectum cancer | Male   | 15-19 years | 95+ years | Global     | 0         | 3     | Socio-demographic Index                                      | 468             |
| Colon and rectum cancer | Male   | 15-19 years | 95+ years | Global     | 0         | 3     | LDI (I\$ per capita)                                         | --              |
| Liver cancer            | Female | 5-9 years   | 95+ years | Data Rich  | 1         | 1     | Hepatitis B (HBsAg) Seroprevalence                           | 10              |
| Liver cancer            | Female | 5-9 years   | 95+ years | Data Rich  | 1         | 1     | Alcohol (liters per capita)                                  | 196             |
| Liver cancer            | Female | 5-9 years   | 95+ years | Data Rich  | 1         | 1     | Log-transformed SEV scalar: Liver C                          | 794             |
| Liver cancer            | Female | 5-9 years   | 95+ years | Data Rich  | 1         | 1     | HIV age-standardized prevalence                              | --              |
| Liver cancer            | Female | 5-9 years   | 95+ years | Data Rich  | 1         | 1     | Hepatitis C (IgG) Seroprevalence                             | --              |
| Liver cancer            | Female | 5-9 years   | 95+ years | Data Rich  | -1        | 2     | Hepatitis B 3-dose coverage (proportion)                     | 303             |
| Liver cancer            | Female | 5-9 years   | 95+ years | Data Rich  | -1        | 2     | Hepatitis B 3-dose coverage (proportion), lagged 10 years    | 304             |
| Liver cancer            | Female | 5-9 years   | 95+ years | Data Rich  | -1        | 2     | Hepatitis B vaccine coverage (proportion), aged through time | 462             |
| Liver cancer            | Female | 5-9 years   | 95+ years | Data Rich  | -1        | 2     | Healthcare access and quality index                          | --              |
| Liver cancer            | Female | 5-9 years   | 95+ years | Data Rich  | -1        | 2     | Hepatitis B 3-dose coverage (proportion), lagged 5 years     | --              |
| Liver cancer            | Female | 5-9 years   | 95+ years | Data Rich  | 1         | 2     | Diabetes Fasting Plasma Glucose (mmol/L)                     | 94              |
| Liver cancer            | Female | 5-9 years   | 95+ years | Data Rich  | 1         | 2     | red meats adjusted(g)                                        | 252             |
| Liver cancer            | Female | 5-9 years   | 95+ years | Data Rich  | 1         | 2     | Intravenous drug use (age-standardized proportion)           | 333             |
| Liver cancer            | Female | 5-9 years   | 95+ years | Data Rich  | 1         | 2     | Diabetes Age-Standardized Prevalence (proportion)            | 502             |
| Liver cancer            | Female | 5-9 years   | 95+ years | Data Rich  | 1         | 2     | Mean BMI                                                     | 671             |
| Liver cancer            | Female | 5-9 years   | 95+ years | Data Rich  | 1         | 2     | Cumulative Cigarettes (10 Years)                             | --              |
| Liver cancer            | Female | 5-9 years   | 95+ years | Data Rich  | 1         | 2     | Cumulative Cigarettes (15 Years)                             | --              |
| Liver cancer            | Female | 5-9 years   | 95+ years | Data Rich  | 1         | 2     | Cumulative Cigarettes (20 Years)                             | --              |
| Liver cancer            | Female | 5-9 years   | 95+ years | Data Rich  | 1         | 2     | Cumulative Cigarettes (5 Years)                              | --              |
| Liver cancer            | Female | 5-9 years   | 95+ years | Data Rich  | 1         | 2     | Tobacco (cigarettes per capita)                              | --              |
| Liver cancer            | Female | 5-9 years   | 95+ years | Data Rich  | -1        | 3     | Education (years per capita)                                 | --              |
| Liver cancer            | Female | 5-9 years   | 95+ years | Data Rich  | 0         | 3     | Socio-demographic Index                                      | 61              |
| Liver cancer            | Female | 5-9 years   | 95+ years | Data Rich  | 0         | 3     | LDI (I\$ per capita)                                         | --              |
| Liver cancer            | Female | 5-9 years   | 95+ years | Global     | 1         | 1     | Alcohol (liters per capita)                                  | --              |
| Liver cancer            | Female | 5-9 years   | 95+ years | Global     | 1         | 1     | HIV age-standardized prevalence                              | --              |
| Liver cancer            | Female | 5-9 years   | 95+ years | Global     | 1         | 1     | Hepatitis B (HBsAg) Seroprevalence                           | --              |
| Liver cancer            | Female | 5-9 years   | 95+ years | Global     | 1         | 1     | Hepatitis C (IgG) Seroprevalence                             | --              |
| Liver cancer            | Female | 5-9 years   | 95+ years | Global     | 1         | 1     | Log-transformed SEV scalar: Liver C                          | --              |
| Liver cancer            | Female | 5-9 years   | 95+ years | Global     | -1        | 2     | Healthcare access and quality index                          | --              |
| Liver cancer            | Female | 5-9 years   | 95+ years | Global     | -1        | 2     | Hepatitis B 3-dose coverage (proportion)                     | --              |
| Liver cancer            | Female | 5-9 years   | 95+ years | Global     | -1        | 2     | Hepatitis B 3-dose coverage (proportion), lagged 10 years    | --              |
| Liver cancer            | Female | 5-9 years   | 95+ years | Global     | -1        | 2     | Hepatitis B 3-dose coverage (proportion), lagged 5 years     | --              |
| Liver cancer            | Female | 5-9 years   | 95+ years | Global     | -1        | 2     | Hepatitis B vaccine coverage (proportion), aged through time | --              |
| Liver cancer            | Female | 5-9 years   | 95+ years | Global     | 1         | 2     | Cumulative Cigarettes (10 Years)                             | --              |
| Liver cancer            | Female | 5-9 years   | 95+ years | Global     | 1         | 2     | Cumulative Cigarettes (15 Years)                             | --              |
| Liver cancer            | Female | 5-9 years   | 95+ years | Global     | 1         | 2     | Cumulative Cigarettes (20 Years)                             | --              |
| Liver cancer            | Female | 5-9 years   | 95+ years | Global     | 1         | 2     | Cumulative Cigarettes (5 Years)                              | --              |
| Liver cancer            | Female | 5-9 years   | 95+ years | Global     | 1         | 2     | Diabetes Age-Standardized Prevalence (proportion)            | --              |
| Liver cancer            | Female | 5-9 years   | 95+ years | Global     | 1         | 2     | Diabetes Fasting Plasma Glucose (mmol/L)                     | --              |
| Liver cancer            | Female | 5-9 years   | 95+ years | Global     | 1         | 2     | Intravenous drug use (age-standardized proportion)           | --              |
| Liver cancer            | Female | 5-9 years   | 95+ years | Global     | 1         | 2     | Mean BMI                                                     | --              |
| Liver cancer            | Female | 5-9 years   | 95+ years | Global     | 1         | 2     | Tobacco (cigarettes per capita)                              | --              |
| Liver cancer            | Female | 5-9 years   | 95+ years | Global     | 1         | 2     | red meats adjusted(g)                                        | --              |
| Liver cancer            | Female | 5-9 years   | 95+ years | Global     | -1        | 3     | Education (years per capita)                                 | --              |
| Liver cancer            | Female | 5-9 years   | 95+ years | Global     | 0         | 3     | LDI (I\$ per capita)                                         | --              |
| Liver cancer            | Female | 5-9 years   | 95+ years | Global     | 0         | 3     | Socio-demographic Index                                      | --              |
| Liver cancer            | Male   | 5-9 years   | 95+ years | Data Rich  | 1         | 1     | Alcohol (liters per capita)                                  | 579             |
| Liver cancer            | Male   | 5-9 years   | 95+ years | Data Rich  | 1         | 1     | HIV age-standardized prevalence                              | --              |
| Liver cancer            | Male   | 5-9 years   | 95+ years | Data Rich  | 1         | 1     | Hepatitis B (HBsAg) Seroprevalence                           | --              |
| Liver cancer            | Male   | 5-9 years   | 95+ years | Data Rich  | 1         | 1     | Hepatitis C (IgG) Seroprevalence                             | --              |
| Liver cancer            | Male   | 5-9 years   | 95+ years | Data Rich  | 1         | 1     | Log-transformed SEV scalar: Liver C                          | --              |
| Liver cancer            | Male   | 5-9 years   | 95+ years | Data Rich  | -1        | 2     | Hepatitis B vaccine coverage (proportion), aged through time | 235             |
| Liver cancer            | Male   | 5-9 years   | 95+ years | Data Rich  | -1        | 2     | Hepatitis B 3-dose coverage (proportion), lagged 5 years     | 344             |
| Liver cancer            | Male   | 5-9 years   | 95+ years | Data Rich  | -1        | 2     | Hepatitis B 3-dose coverage (proportion), lagged 10 years    | 354             |
| Liver cancer            | Male   | 5-9 years   | 95+ years | Data Rich  | -1        | 2     | Hepatitis B 3-dose coverage (proportion)                     | 413             |
| Liver cancer            | Male   | 5-9 years   | 95+ years | Data Rich  | -1        | 2     | Healthcare access and quality index                          | --              |
| Liver cancer            | Male   | 5-9 years   | 95+ years | Data Rich  | 1         | 2     | Diabetes Fasting Plasma Glucose (mmol/L)                     | 2               |
| Liver cancer            | Male   | 5-9 years   | 95+ years | Data Rich  | 1         | 2     | red meats adjusted(g)                                        | 2               |
| Liver cancer            | Male   | 5-9 years   | 95+ years | Data Rich  | 1         | 2     | Intravenous drug use (age-standardized proportion)           | 173             |
| Liver cancer            | Male   | 5-9 years   | 95+ years | Data Rich  | 1         | 2     | Diabetes Age-Standardized Prevalence (proportion)            | 293             |
| Liver cancer            | Male   | 5-9 years   | 95+ years | Data Rich  | 1         | 2     | Mean BMI                                                     | 979             |
| Liver cancer            | Male   | 5-9 years   | 95+ years | Data Rich  | 1         | 2     | Cumulative Cigarettes (10 Years)                             | --              |
| Liver cancer            | Male   | 5-9 years   | 95+ years | Data Rich  | 1         | 2     | Cumulative Cigarettes (15 Years)                             | --              |
| Liver cancer            | Male   | 5-9 years   | 95+ years | Data Rich  | 1         | 2     | Cumulative Cigarettes (20 Years)                             | --              |
| Liver cancer            | Male   | 5-9 years   | 95+ years | Data Rich  | 1         | 2     | Cumulative Cigarettes (5 Years)                              | --              |
| Liver cancer            | Male   | 5-9 years   | 95+ years | Data Rich  | 1         | 2     | Tobacco (cigarettes per capita)                              | --              |
| Liver cancer            | Male   | 5-9 years   | 95+ years | Data Rich  | -1        | 3     | Education (years per capita)                                 | 73              |
| Liver cancer            | Male   | 5-9 years   | 95+ years | Data Rich  | 0         | 3     | Socio-demographic Index                                      | 252             |
| Liver cancer            | Male   | 5-9 years   | 95+ years | Data Rich  | 0         | 3     | LDI (I\$ per capita)                                         | --              |
| Liver cancer            | Male   | 5-9 years   | 95+ years | Global     | 1         | 1     | Alcohol (liters per capita)                                  | --              |

**Appendix Table 9: CODEm covariates used, level of covariate, and expected direction of covariate by cause, sex, and age**

*Covariates that CODEm did not select during the covariate selection process have no draw counts listed.*

| Cause                                | Sex    | Age Start   | Age End   | Model Type | Direction | Level | Covariate Name                                               | Number of Draws |
|--------------------------------------|--------|-------------|-----------|------------|-----------|-------|--------------------------------------------------------------|-----------------|
| Liver cancer                         | Male   | 5-9 years   | 95+ years | Global     | 1         | 1     | HIV age-standardized prevalence                              | --              |
| Liver cancer                         | Male   | 5-9 years   | 95+ years | Global     | 1         | 1     | Hepatitis B (HBsAg) Seroprevalence                           | --              |
| Liver cancer                         | Male   | 5-9 years   | 95+ years | Global     | 1         | 1     | Hepatitis C (IgG) Seroprevalence                             | --              |
| Liver cancer                         | Male   | 5-9 years   | 95+ years | Global     | 1         | 1     | Log-transformed SEV scalar: Liver C                          | --              |
| Liver cancer                         | Male   | 5-9 years   | 95+ years | Global     | -1        | 2     | Healthcare access and quality index                          | --              |
| Liver cancer                         | Male   | 5-9 years   | 95+ years | Global     | -1        | 2     | Hepatitis B 3-dose coverage (proportion)                     | --              |
| Liver cancer                         | Male   | 5-9 years   | 95+ years | Global     | -1        | 2     | Hepatitis B 3-dose coverage (proportion), lagged 10 years    | --              |
| Liver cancer                         | Male   | 5-9 years   | 95+ years | Global     | -1        | 2     | Hepatitis B 3-dose coverage (proportion), lagged 5 years     | --              |
| Liver cancer                         | Male   | 5-9 years   | 95+ years | Global     | -1        | 2     | Hepatitis B vaccine coverage (proportion), aged through time | --              |
| Liver cancer                         | Male   | 5-9 years   | 95+ years | Global     | 1         | 2     | Cumulative Cigarettes (10 Years)                             | --              |
| Liver cancer                         | Male   | 5-9 years   | 95+ years | Global     | 1         | 2     | Cumulative Cigarettes (15 Years)                             | --              |
| Liver cancer                         | Male   | 5-9 years   | 95+ years | Global     | 1         | 2     | Cumulative Cigarettes (20 Years)                             | --              |
| Liver cancer                         | Male   | 5-9 years   | 95+ years | Global     | 1         | 2     | Cumulative Cigarettes (5 Years)                              | --              |
| Liver cancer                         | Male   | 5-9 years   | 95+ years | Global     | 1         | 2     | Diabetes Age-Standardized Prevalence (proportion)            | --              |
| Liver cancer                         | Male   | 5-9 years   | 95+ years | Global     | 1         | 2     | Diabetes Fasting Plasma Glucose (mmol/L)                     | --              |
| Liver cancer                         | Male   | 5-9 years   | 95+ years | Global     | 1         | 2     | Intravenous drug use (age-standardized proportion)           | --              |
| Liver cancer                         | Male   | 5-9 years   | 95+ years | Global     | 1         | 2     | Mean BMI                                                     | --              |
| Liver cancer                         | Male   | 5-9 years   | 95+ years | Global     | 1         | 2     | Tobacco (cigarettes per capita)                              | --              |
| Liver cancer                         | Male   | 5-9 years   | 95+ years | Global     | 1         | 2     | red meats adjusted(g)                                        | --              |
| Liver cancer                         | Male   | 5-9 years   | 95+ years | Global     | -1        | 3     | Education (years per capita)                                 | --              |
| Liver cancer                         | Male   | 5-9 years   | 95+ years | Global     | 0         | 3     | LDI (I\$ per capita)                                         | --              |
| Liver cancer                         | Male   | 5-9 years   | 95+ years | Global     | 0         | 3     | Socio-demographic Index                                      | --              |
| Gallbladder and biliary tract cancer | Female | 15-19 years | 95+ years | Data Rich  | 1         | 1     | Log-transformed SEV scalar: Gallblad C                       | --              |
| Gallbladder and biliary tract cancer | Female | 15-19 years | 95+ years | Data Rich  | 1         | 1     | Mean BMI                                                     | --              |
| Gallbladder and biliary tract cancer | Female | 15-19 years | 95+ years | Data Rich  | -1        | 2     | fruits adjusted(g)                                           | 25              |
| Gallbladder and biliary tract cancer | Female | 15-19 years | 95+ years | Data Rich  | -1        | 2     | Healthcare access and quality index                          | 79              |
| Gallbladder and biliary tract cancer | Female | 15-19 years | 95+ years | Data Rich  | -1        | 2     | vegetables adjusted(g)                                       | 125             |
| Gallbladder and biliary tract cancer | Female | 15-19 years | 95+ years | Data Rich  | 1         | 2     | Smoking Prevalence                                           | 354             |
| Gallbladder and biliary tract cancer | Female | 15-19 years | 95+ years | Data Rich  | 1         | 2     | Cumulative Cigarettes (10 Years)                             | 502             |
| Gallbladder and biliary tract cancer | Female | 15-19 years | 95+ years | Data Rich  | 1         | 2     | Alcohol (liters per capita)                                  | --              |
| Gallbladder and biliary tract cancer | Female | 15-19 years | 95+ years | Data Rich  | 1         | 2     | Cumulative Cigarettes (5 Years)                              | --              |
| Gallbladder and biliary tract cancer | Female | 15-19 years | 95+ years | Data Rich  | 1         | 2     | Diabetes Age-Standardized Prevalence (proportion)            | --              |
| Gallbladder and biliary tract cancer | Female | 15-19 years | 95+ years | Data Rich  | 1         | 2     | Tobacco (cigarettes per capita)                              | --              |
| Gallbladder and biliary tract cancer | Female | 15-19 years | 95+ years | Data Rich  | -1        | 3     | Education (years per capita)                                 | 113             |
| Gallbladder and biliary tract cancer | Female | 15-19 years | 95+ years | Data Rich  | 0         | 3     | Socio-demographic Index                                      | 77              |
| Gallbladder and biliary tract cancer | Female | 15-19 years | 95+ years | Data Rich  | 0         | 3     | LDI (I\$ per capita)                                         | --              |
| Gallbladder and biliary tract cancer | Female | 15-19 years | 95+ years | Global     | 1         | 1     | Log-transformed SEV scalar: Gallblad C                       | --              |
| Gallbladder and biliary tract cancer | Female | 15-19 years | 95+ years | Global     | 1         | 1     | Mean BMI                                                     | --              |
| Gallbladder and biliary tract cancer | Female | 15-19 years | 95+ years | Global     | -1        | 2     | Healthcare access and quality index                          | 532             |
| Gallbladder and biliary tract cancer | Female | 15-19 years | 95+ years | Global     | -1        | 2     | fruits adjusted(g)                                           | --              |
| Gallbladder and biliary tract cancer | Female | 15-19 years | 95+ years | Global     | -1        | 2     | vegetables adjusted(g)                                       | --              |
| Gallbladder and biliary tract cancer | Female | 15-19 years | 95+ years | Global     | 1         | 2     | Cumulative Cigarettes (10 Years)                             | 262             |
| Gallbladder and biliary tract cancer | Female | 15-19 years | 95+ years | Global     | 1         | 2     | Smoking Prevalence                                           | 412             |
| Gallbladder and biliary tract cancer | Female | 15-19 years | 95+ years | Global     | 1         | 2     | Cumulative Cigarettes (5 Years)                              | 420             |
| Gallbladder and biliary tract cancer | Female | 15-19 years | 95+ years | Global     | 1         | 2     | Alcohol (liters per capita)                                  | 682             |
| Gallbladder and biliary tract cancer | Female | 15-19 years | 95+ years | Global     | 1         | 2     | Diabetes Age-Standardized Prevalence (proportion)            | --              |
| Gallbladder and biliary tract cancer | Female | 15-19 years | 95+ years | Global     | 1         | 2     | Tobacco (cigarettes per capita)                              | --              |
| Gallbladder and biliary tract cancer | Female | 15-19 years | 95+ years | Global     | -1        | 3     | Education (years per capita)                                 | 282             |
| Gallbladder and biliary tract cancer | Female | 15-19 years | 95+ years | Global     | 0         | 3     | Socio-demographic Index                                      | 343             |
| Gallbladder and biliary tract cancer | Female | 15-19 years | 95+ years | Global     | 0         | 3     | LDI (I\$ per capita)                                         | --              |
| Gallbladder and biliary tract cancer | Male   | 15-19 years | 95+ years | Data Rich  | 1         | 1     | Log-transformed SEV scalar: Gallblad C                       | --              |
| Gallbladder and biliary tract cancer | Male   | 15-19 years | 95+ years | Data Rich  | 1         | 1     | Mean BMI                                                     | --              |
| Gallbladder and biliary tract cancer | Male   | 15-19 years | 95+ years | Data Rich  | -1        | 2     | fruits adjusted(g)                                           | 97              |
| Gallbladder and biliary tract cancer | Male   | 15-19 years | 95+ years | Data Rich  | -1        | 2     | vegetables adjusted(g)                                       | 497             |
| Gallbladder and biliary tract cancer | Male   | 15-19 years | 95+ years | Data Rich  | -1        | 2     | Healthcare access and quality index                          | --              |
| Gallbladder and biliary tract cancer | Male   | 15-19 years | 95+ years | Data Rich  | 1         | 2     | Cumulative Cigarettes (5 Years)                              | 155             |
| Gallbladder and biliary tract cancer | Male   | 15-19 years | 95+ years | Data Rich  | 1         | 2     | Alcohol (liters per capita)                                  | 198             |
| Gallbladder and biliary tract cancer | Male   | 15-19 years | 95+ years | Data Rich  | 1         | 2     | Cumulative Cigarettes (10 Years)                             | 241             |
| Gallbladder and biliary tract cancer | Male   | 15-19 years | 95+ years | Data Rich  | 1         | 2     | Smoking Prevalence                                           | 396             |
| Gallbladder and biliary tract cancer | Male   | 15-19 years | 95+ years | Data Rich  | 1         | 2     | Tobacco (cigarettes per capita)                              | 396             |
| Gallbladder and biliary tract cancer | Male   | 15-19 years | 95+ years | Data Rich  | 1         | 2     | Diabetes Age-Standardized Prevalence (proportion)            | --              |
| Gallbladder and biliary tract cancer | Male   | 15-19 years | 95+ years | Data Rich  | -1        | 3     | Education (years per capita)                                 | 324             |
| Gallbladder and biliary tract cancer | Male   | 15-19 years | 95+ years | Data Rich  | 0         | 3     | Socio-demographic Index                                      | 207             |
| Gallbladder and biliary tract cancer | Male   | 15-19 years | 95+ years | Data Rich  | 0         | 3     | LDI (I\$ per capita)                                         | --              |
| Gallbladder and biliary tract cancer | Male   | 15-19 years | 95+ years | Global     | 1         | 1     | Log-transformed SEV scalar: Gallblad C                       | 463             |
| Gallbladder and biliary tract cancer | Male   | 15-19 years | 95+ years | Global     | 1         | 1     | Mean BMI                                                     | --              |
| Gallbladder and biliary tract cancer | Male   | 15-19 years | 95+ years | Global     | -1        | 2     | vegetables adjusted(g)                                       | 100             |
| Gallbladder and biliary tract cancer | Male   | 15-19 years | 95+ years | Global     | -1        | 2     | Healthcare access and quality index                          | --              |
| Gallbladder and biliary tract cancer | Male   | 15-19 years | 95+ years | Global     | -1        | 2     | fruits adjusted(g)                                           | --              |
| Gallbladder and biliary tract cancer | Male   | 15-19 years | 95+ years | Global     | 1         | 2     | Alcohol (liters per capita)                                  | 245             |
| Gallbladder and biliary tract cancer | Male   | 15-19 years | 95+ years | Global     | 1         | 2     | Cumulative Cigarettes (10 Years)                             | 562             |
| Gallbladder and biliary tract cancer | Male   | 15-19 years | 95+ years | Global     | 1         | 2     | Cumulative Cigarettes (5 Years)                              | --              |
| Gallbladder and biliary tract cancer | Male   | 15-19 years | 95+ years | Global     | 1         | 2     | Diabetes Age-Standardized Prevalence (proportion)            | --              |
| Gallbladder and biliary tract cancer | Male   | 15-19 years | 95+ years | Global     | 1         | 2     | Smoking Prevalence                                           | --              |
| Gallbladder and biliary tract cancer | Male   | 15-19 years | 95+ years | Global     | 1         | 2     | Tobacco (cigarettes per capita)                              | --              |
| Gallbladder and biliary tract cancer | Male   | 15-19 years | 95+ years | Global     | -1        | 3     | Education (years per capita)                                 | 293             |
| Gallbladder and biliary tract cancer | Male   | 15-19 years | 95+ years | Global     | 0         | 3     | Socio-demographic Index                                      | 173             |
| Gallbladder and biliary tract cancer | Male   | 15-19 years | 95+ years | Global     | 0         | 3     | LDI (I\$ per capita)                                         | --              |

**Appendix Table 9: CODEm covariates used, level of covariate, and expected direction of covariate by cause, sex, and age**

*Covariates that CODEm did not select during the covariate selection process have no draw counts listed.*

| Cause             | Sex    | Age Start   | Age End   | Model Type | Direction | Level | Covariate Name                                    | Number of Draws |
|-------------------|--------|-------------|-----------|------------|-----------|-------|---------------------------------------------------|-----------------|
| Pancreatic cancer | Female | 15-19 years | 95+ years | Data Rich  | 1         | 1     | Alcohol (liters per capita)                       | 0               |
| Pancreatic cancer | Female | 15-19 years | 95+ years | Data Rich  | 1         | 1     | Tobacco (cigarettes per capita)                   | 5               |
| Pancreatic cancer | Female | 15-19 years | 95+ years | Data Rich  | 1         | 1     | Cumulative Cigarettes (5 Years)                   | 105             |
| Pancreatic cancer | Female | 15-19 years | 95+ years | Data Rich  | 1         | 1     | Cumulative Cigarettes (10 Years)                  | 177             |
| Pancreatic cancer | Female | 15-19 years | 95+ years | Data Rich  | 1         | 1     | Cumulative Cigarettes (15 Years)                  | 230             |
| Pancreatic cancer | Female | 15-19 years | 95+ years | Data Rich  | 1         | 1     | Cumulative Cigarettes (20 Years)                  | 279             |
| Pancreatic cancer | Female | 15-19 years | 95+ years | Data Rich  | 1         | 1     | Smoking Prevalence                                | 446             |
| Pancreatic cancer | Female | 15-19 years | 95+ years | Data Rich  | 1         | 1     | Log-transformed SEV scalar: Pancreas C            | 700             |
| Pancreatic cancer | Female | 15-19 years | 95+ years | Data Rich  | 1         | 1     | Mean BMI                                          | 810             |
| Pancreatic cancer | Female | 15-19 years | 95+ years | Data Rich  | -1        | 2     | Healthcare access and quality index               | --              |
| Pancreatic cancer | Female | 15-19 years | 95+ years | Data Rich  | -1        | 2     | fruits adjusted(g)                                | --              |
| Pancreatic cancer | Female | 15-19 years | 95+ years | Data Rich  | -1        | 2     | vegetables adjusted(g)                            | --              |
| Pancreatic cancer | Female | 15-19 years | 95+ years | Data Rich  | 1         | 2     | red meats adjusted(g)                             | 0               |
| Pancreatic cancer | Female | 15-19 years | 95+ years | Data Rich  | 1         | 2     | Diabetes Fasting Plasma Glucose (mmol/L)          | 75              |
| Pancreatic cancer | Female | 15-19 years | 95+ years | Data Rich  | 1         | 2     | energy unadjusted(kcal)                           | 186             |
| Pancreatic cancer | Female | 15-19 years | 95+ years | Data Rich  | 1         | 2     | Diabetes Age-Standardized Prevalence (proportion) | 192             |
| Pancreatic cancer | Female | 15-19 years | 95+ years | Data Rich  | -1        | 3     | Education (years per capita)                      | --              |
| Pancreatic cancer | Female | 15-19 years | 95+ years | Data Rich  | 0         | 3     | Socio-demographic Index                           | 980             |
| Pancreatic cancer | Female | 15-19 years | 95+ years | Data Rich  | 0         | 3     | LDI (IS per capita)                               | --              |
| Pancreatic cancer | Female | 15-19 years | 95+ years | Global     | 1         | 1     | Alcohol (liters per capita)                       | 0               |
| Pancreatic cancer | Female | 15-19 years | 95+ years | Global     | 1         | 1     | Cumulative Cigarettes (15 Years)                  | 131             |
| Pancreatic cancer | Female | 15-19 years | 95+ years | Global     | 1         | 1     | Cumulative Cigarettes (5 Years)                   | 133             |
| Pancreatic cancer | Female | 15-19 years | 95+ years | Global     | 1         | 1     | Cumulative Cigarettes (20 Years)                  | 157             |
| Pancreatic cancer | Female | 15-19 years | 95+ years | Global     | 1         | 1     | Cumulative Cigarettes (10 Years)                  | 179             |
| Pancreatic cancer | Female | 15-19 years | 95+ years | Global     | 1         | 1     | Tobacco (cigarettes per capita)                   | 502             |
| Pancreatic cancer | Female | 15-19 years | 95+ years | Global     | 1         | 1     | Smoking Prevalence                                | 542             |
| Pancreatic cancer | Female | 15-19 years | 95+ years | Global     | 1         | 1     | Log-transformed SEV scalar: Pancreas C            | 610             |
| Pancreatic cancer | Female | 15-19 years | 95+ years | Global     | 1         | 1     | Mean BMI                                          | 999             |
| Pancreatic cancer | Female | 15-19 years | 95+ years | Global     | -1        | 2     | Healthcare access and quality index               | --              |
| Pancreatic cancer | Female | 15-19 years | 95+ years | Global     | -1        | 2     | fruits adjusted(g)                                | --              |
| Pancreatic cancer | Female | 15-19 years | 95+ years | Global     | -1        | 2     | vegetables adjusted(g)                            | --              |
| Pancreatic cancer | Female | 15-19 years | 95+ years | Global     | 1         | 2     | energy unadjusted(kcal)                           | 0               |
| Pancreatic cancer | Female | 15-19 years | 95+ years | Global     | 1         | 2     | Diabetes Age-Standardized Prevalence (proportion) | 1               |
| Pancreatic cancer | Female | 15-19 years | 95+ years | Global     | 1         | 2     | Diabetes Fasting Plasma Glucose (mmol/L)          | 1               |
| Pancreatic cancer | Female | 15-19 years | 95+ years | Global     | 1         | 2     | red meats adjusted(g)                             | 138             |
| Pancreatic cancer | Female | 15-19 years | 95+ years | Global     | -1        | 3     | Education (years per capita)                      | --              |
| Pancreatic cancer | Female | 15-19 years | 95+ years | Global     | 0         | 3     | Socio-demographic Index                           | 999             |
| Pancreatic cancer | Female | 15-19 years | 95+ years | Global     | 0         | 3     | LDI (IS per capita)                               | --              |
| Pancreatic cancer | Male   | 15-19 years | 95+ years | Data Rich  | 1         | 1     | Cumulative Cigarettes (5 Years)                   | 12              |
| Pancreatic cancer | Male   | 15-19 years | 95+ years | Data Rich  | 1         | 1     | Tobacco (cigarettes per capita)                   | 46              |
| Pancreatic cancer | Male   | 15-19 years | 95+ years | Data Rich  | 1         | 1     | Cumulative Cigarettes (10 Years)                  | 93              |
| Pancreatic cancer | Male   | 15-19 years | 95+ years | Data Rich  | 1         | 1     | Smoking Prevalence                                | 165             |
| Pancreatic cancer | Male   | 15-19 years | 95+ years | Data Rich  | 1         | 1     | Log-transformed SEV scalar: Pancreas C            | 180             |
| Pancreatic cancer | Male   | 15-19 years | 95+ years | Data Rich  | 1         | 1     | Cumulative Cigarettes (20 Years)                  | 205             |
| Pancreatic cancer | Male   | 15-19 years | 95+ years | Data Rich  | 1         | 1     | Cumulative Cigarettes (15 Years)                  | 702             |
| Pancreatic cancer | Male   | 15-19 years | 95+ years | Data Rich  | 1         | 1     | Mean BMI                                          | 923             |
| Pancreatic cancer | Male   | 15-19 years | 95+ years | Data Rich  | 1         | 1     | Alcohol (liters per capita)                       | --              |
| Pancreatic cancer | Male   | 15-19 years | 95+ years | Data Rich  | -1        | 2     | Healthcare access and quality index               | --              |
| Pancreatic cancer | Male   | 15-19 years | 95+ years | Data Rich  | -1        | 2     | fruits adjusted(g)                                | --              |
| Pancreatic cancer | Male   | 15-19 years | 95+ years | Data Rich  | -1        | 2     | vegetables adjusted(g)                            | --              |
| Pancreatic cancer | Male   | 15-19 years | 95+ years | Data Rich  | 1         | 2     | Diabetes Age-Standardized Prevalence (proportion) | 46              |
| Pancreatic cancer | Male   | 15-19 years | 95+ years | Data Rich  | 1         | 2     | energy unadjusted(kcal)                           | 66              |
| Pancreatic cancer | Male   | 15-19 years | 95+ years | Data Rich  | 1         | 2     | red meats adjusted(g)                             | 84              |
| Pancreatic cancer | Male   | 15-19 years | 95+ years | Data Rich  | 1         | 2     | Diabetes Fasting Plasma Glucose (mmol/L)          | 436             |
| Pancreatic cancer | Male   | 15-19 years | 95+ years | Data Rich  | -1        | 3     | Education (years per capita)                      | --              |
| Pancreatic cancer | Male   | 15-19 years | 95+ years | Data Rich  | 0         | 3     | Socio-demographic Index                           | 588             |
| Pancreatic cancer | Male   | 15-19 years | 95+ years | Data Rich  | 0         | 3     | LDI (IS per capita)                               | --              |
| Pancreatic cancer | Male   | 15-19 years | 95+ years | Global     | 1         | 1     | Alcohol (liters per capita)                       | 0               |
| Pancreatic cancer | Male   | 15-19 years | 95+ years | Global     | 1         | 1     | Tobacco (cigarettes per capita)                   | 38              |
| Pancreatic cancer | Male   | 15-19 years | 95+ years | Global     | 1         | 1     | Cumulative Cigarettes (20 Years)                  | 82              |
| Pancreatic cancer | Male   | 15-19 years | 95+ years | Global     | 1         | 1     | Cumulative Cigarettes (10 Years)                  | 85              |
| Pancreatic cancer | Male   | 15-19 years | 95+ years | Global     | 1         | 1     | Smoking Prevalence                                | 214             |
| Pancreatic cancer | Male   | 15-19 years | 95+ years | Global     | 1         | 1     | Log-transformed SEV scalar: Pancreas C            | 288             |
| Pancreatic cancer | Male   | 15-19 years | 95+ years | Global     | 1         | 1     | Cumulative Cigarettes (15 Years)                  | 327             |
| Pancreatic cancer | Male   | 15-19 years | 95+ years | Global     | 1         | 1     | Cumulative Cigarettes (5 Years)                   | 532             |
| Pancreatic cancer | Male   | 15-19 years | 95+ years | Global     | 1         | 1     | Mean BMI                                          | 935             |
| Pancreatic cancer | Male   | 15-19 years | 95+ years | Global     | -1        | 2     | Healthcare access and quality index               | --              |
| Pancreatic cancer | Male   | 15-19 years | 95+ years | Global     | -1        | 2     | fruits adjusted(g)                                | --              |
| Pancreatic cancer | Male   | 15-19 years | 95+ years | Global     | -1        | 2     | vegetables adjusted(g)                            | --              |
| Pancreatic cancer | Male   | 15-19 years | 95+ years | Global     | 1         | 2     | energy unadjusted(kcal)                           | 67              |
| Pancreatic cancer | Male   | 15-19 years | 95+ years | Global     | 1         | 2     | Diabetes Fasting Plasma Glucose (mmol/L)          | 122             |
| Pancreatic cancer | Male   | 15-19 years | 95+ years | Global     | 1         | 2     | Diabetes Age-Standardized Prevalence (proportion) | 254             |
| Pancreatic cancer | Male   | 15-19 years | 95+ years | Global     | 1         | 2     | red meats adjusted(g)                             | 337             |
| Pancreatic cancer | Male   | 15-19 years | 95+ years | Global     | -1        | 3     | Education (years per capita)                      | --              |
| Pancreatic cancer | Male   | 15-19 years | 95+ years | Global     | 0         | 3     | Socio-demographic Index                           | 679             |
| Pancreatic cancer | Male   | 15-19 years | 95+ years | Global     | 0         | 3     | LDI (IS per capita)                               | --              |
| Larynx cancer     | Female | 15-19 years | 95+ years | Data Rich  | 1         | 1     | Alcohol (liters per capita)                       | 180             |
| Larynx cancer     | Female | 15-19 years | 95+ years | Data Rich  | 1         | 1     | Log-transformed SEV scalar: Larynx C              | 1000            |

**Appendix Table 9: CODEm covariates used, level of covariate, and expected direction of covariate by cause, sex, and age**

*Covariates that CODEm did not select during the covariate selection process have no draw counts listed.*

| Cause                               | Sex    | Age Start   | Age End   | Model Type | Direction | Level | Covariate Name                                         | Number of Draws |
|-------------------------------------|--------|-------------|-----------|------------|-----------|-------|--------------------------------------------------------|-----------------|
| Larynx cancer                       | Female | 15-19 years | 95+ years | Data Rich  | -1        | 2     | Healthcare access and quality index                    | 0               |
| Larynx cancer                       | Female | 15-19 years | 95+ years | Data Rich  | -1        | 2     | fruits adjusted(g)                                     | 0               |
| Larynx cancer                       | Female | 15-19 years | 95+ years | Data Rich  | -1        | 2     | vegetables adjusted(g)                                 | 0               |
| Larynx cancer                       | Female | 15-19 years | 95+ years | Data Rich  | 1         | 2     | Tobacco (cigarettes per capita)                        | 0               |
| Larynx cancer                       | Female | 15-19 years | 95+ years | Data Rich  | 1         | 2     | Smoking Prevalence                                     | 10              |
| Larynx cancer                       | Female | 15-19 years | 95+ years | Data Rich  | 1         | 2     | Cumulative Cigarettes (20 Years)                       | 120             |
| Larynx cancer                       | Female | 15-19 years | 95+ years | Data Rich  | 1         | 2     | Cumulative Cigarettes (15 Years)                       | 123             |
| Larynx cancer                       | Female | 15-19 years | 95+ years | Data Rich  | 1         | 2     | Cumulative Cigarettes (10 Years)                       | 161             |
| Larynx cancer                       | Female | 15-19 years | 95+ years | Data Rich  | 1         | 2     | Cumulative Cigarettes (5 Years)                        | 212             |
| Larynx cancer                       | Female | 15-19 years | 95+ years | Data Rich  | 1         | 2     | Population Density (over 1000 ppl/sqkm, proportion)    | 529             |
| Larynx cancer                       | Female | 15-19 years | 95+ years | Data Rich  | 1         | 2     | Asbestos consumption (metric tons per year per capita) | --              |
| Larynx cancer                       | Female | 15-19 years | 95+ years | Data Rich  | 1         | 2     | Population Density (under 150 ppl/sqkm, proportion)    | --              |
| Larynx cancer                       | Female | 15-19 years | 95+ years | Data Rich  | -1        | 3     | Education (years per capita)                           | 8               |
| Larynx cancer                       | Female | 15-19 years | 95+ years | Data Rich  | 0         | 3     | Socio-demographic Index                                | 375             |
| Larynx cancer                       | Female | 15-19 years | 95+ years | Data Rich  | 0         | 3     | LDI (IS per capita)                                    | --              |
| Larynx cancer                       | Female | 15-19 years | 95+ years | Global     | 1         | 1     | Alcohol (liters per capita)                            | 253             |
| Larynx cancer                       | Female | 15-19 years | 95+ years | Global     | 1         | 1     | Log-transformed SEV scalar: Larynx C                   | 875             |
| Larynx cancer                       | Female | 15-19 years | 95+ years | Global     | -1        | 2     | vegetables adjusted(g)                                 | 0               |
| Larynx cancer                       | Female | 15-19 years | 95+ years | Global     | -1        | 2     | fruits adjusted(g)                                     | 138             |
| Larynx cancer                       | Female | 15-19 years | 95+ years | Global     | -1        | 2     | Healthcare access and quality index                    | 372             |
| Larynx cancer                       | Female | 15-19 years | 95+ years | Global     | 1         | 2     | Tobacco (cigarettes per capita)                        | 94              |
| Larynx cancer                       | Female | 15-19 years | 95+ years | Global     | 1         | 2     | Cumulative Cigarettes (20 Years)                       | 152             |
| Larynx cancer                       | Female | 15-19 years | 95+ years | Global     | 1         | 2     | Cumulative Cigarettes (15 Years)                       | 181             |
| Larynx cancer                       | Female | 15-19 years | 95+ years | Global     | 1         | 2     | Cumulative Cigarettes (10 Years)                       | 233             |
| Larynx cancer                       | Female | 15-19 years | 95+ years | Global     | 1         | 2     | Cumulative Cigarettes (5 Years)                        | 285             |
| Larynx cancer                       | Female | 15-19 years | 95+ years | Global     | 1         | 2     | Smoking Prevalence                                     | 413             |
| Larynx cancer                       | Female | 15-19 years | 95+ years | Global     | 1         | 2     | Population Density (over 1000 ppl/sqkm, proportion)    | 618             |
| Larynx cancer                       | Female | 15-19 years | 95+ years | Global     | 1         | 2     | Asbestos consumption (metric tons per year per capita) | --              |
| Larynx cancer                       | Female | 15-19 years | 95+ years | Global     | 1         | 2     | Population Density (under 150 ppl/sqkm, proportion)    | --              |
| Larynx cancer                       | Female | 15-19 years | 95+ years | Global     | -1        | 3     | Education (years per capita)                           | 165             |
| Larynx cancer                       | Female | 15-19 years | 95+ years | Global     | 0         | 3     | Socio-demographic Index                                | 39              |
| Larynx cancer                       | Female | 15-19 years | 95+ years | Global     | 0         | 3     | LDI (IS per capita)                                    | --              |
| Larynx cancer                       | Male   | 15-19 years | 95+ years | Data Rich  | 1         | 1     | Log-transformed SEV scalar: Larynx C                   | 59              |
| Larynx cancer                       | Male   | 15-19 years | 95+ years | Data Rich  | 1         | 1     | Alcohol (liters per capita)                            | 982             |
| Larynx cancer                       | Male   | 15-19 years | 95+ years | Data Rich  | -1        | 2     | fruits adjusted(g)                                     | 0               |
| Larynx cancer                       | Male   | 15-19 years | 95+ years | Data Rich  | -1        | 2     | Healthcare access and quality index                    | 57              |
| Larynx cancer                       | Male   | 15-19 years | 95+ years | Data Rich  | -1        | 2     | vegetables adjusted(g)                                 | 732             |
| Larynx cancer                       | Male   | 15-19 years | 95+ years | Data Rich  | 1         | 2     | Tobacco (cigarettes per capita)                        | 97              |
| Larynx cancer                       | Male   | 15-19 years | 95+ years | Data Rich  | 1         | 2     | Cumulative Cigarettes (10 Years)                       | 143             |
| Larynx cancer                       | Male   | 15-19 years | 95+ years | Data Rich  | 1         | 2     | Smoking Prevalence                                     | 347             |
| Larynx cancer                       | Male   | 15-19 years | 95+ years | Data Rich  | 1         | 2     | Cumulative Cigarettes (15 Years)                       | 400             |
| Larynx cancer                       | Male   | 15-19 years | 95+ years | Data Rich  | 1         | 2     | Cumulative Cigarettes (5 Years)                        | 467             |
| Larynx cancer                       | Male   | 15-19 years | 95+ years | Data Rich  | 1         | 2     | Cumulative Cigarettes (20 Years)                       | 468             |
| Larynx cancer                       | Male   | 15-19 years | 95+ years | Data Rich  | 1         | 2     | Population Density (over 1000 ppl/sqkm, proportion)    | 789             |
| Larynx cancer                       | Male   | 15-19 years | 95+ years | Data Rich  | 1         | 2     | Asbestos consumption (metric tons per year per capita) | --              |
| Larynx cancer                       | Male   | 15-19 years | 95+ years | Data Rich  | 1         | 2     | Population Density (under 150 ppl/sqkm, proportion)    | --              |
| Larynx cancer                       | Male   | 15-19 years | 95+ years | Data Rich  | -1        | 3     | Education (years per capita)                           | 22              |
| Larynx cancer                       | Male   | 15-19 years | 95+ years | Data Rich  | 0         | 3     | Socio-demographic Index                                | 32              |
| Larynx cancer                       | Male   | 15-19 years | 95+ years | Data Rich  | 0         | 3     | LDI (IS per capita)                                    | --              |
| Larynx cancer                       | Male   | 15-19 years | 95+ years | Global     | 1         | 1     | Log-transformed SEV scalar: Larynx C                   | 413             |
| Larynx cancer                       | Male   | 15-19 years | 95+ years | Global     | 1         | 1     | Alcohol (liters per capita)                            | 587             |
| Larynx cancer                       | Male   | 15-19 years | 95+ years | Global     | -1        | 2     | fruits adjusted(g)                                     | 0               |
| Larynx cancer                       | Male   | 15-19 years | 95+ years | Global     | -1        | 2     | Healthcare access and quality index                    | 168             |
| Larynx cancer                       | Male   | 15-19 years | 95+ years | Global     | -1        | 2     | vegetables adjusted(g)                                 | 390             |
| Larynx cancer                       | Male   | 15-19 years | 95+ years | Global     | 1         | 2     | Cumulative Cigarettes (20 Years)                       | 79              |
| Larynx cancer                       | Male   | 15-19 years | 95+ years | Global     | 1         | 2     | Cumulative Cigarettes (10 Years)                       | 377             |
| Larynx cancer                       | Male   | 15-19 years | 95+ years | Global     | 1         | 2     | Smoking Prevalence                                     | 466             |
| Larynx cancer                       | Male   | 15-19 years | 95+ years | Global     | 1         | 2     | Population Density (over 1000 ppl/sqkm, proportion)    | 471             |
| Larynx cancer                       | Male   | 15-19 years | 95+ years | Global     | 1         | 2     | Cumulative Cigarettes (5 Years)                        | 484             |
| Larynx cancer                       | Male   | 15-19 years | 95+ years | Global     | 1         | 2     | Tobacco (cigarettes per capita)                        | 693             |
| Larynx cancer                       | Male   | 15-19 years | 95+ years | Global     | 1         | 2     | Cumulative Cigarettes (15 Years)                       | 727             |
| Larynx cancer                       | Male   | 15-19 years | 95+ years | Global     | 1         | 2     | Asbestos consumption (metric tons per year per capita) | --              |
| Larynx cancer                       | Male   | 15-19 years | 95+ years | Global     | 1         | 2     | Population Density (under 150 ppl/sqkm, proportion)    | --              |
| Larynx cancer                       | Male   | 15-19 years | 95+ years | Global     | -1        | 3     | Education (years per capita)                           | 155             |
| Larynx cancer                       | Male   | 15-19 years | 95+ years | Global     | 0         | 3     | Socio-demographic Index                                | 245             |
| Larynx cancer                       | Male   | 15-19 years | 95+ years | Global     | 0         | 3     | LDI (IS per capita)                                    | --              |
| Tracheal, bronchus, and lung cancer | Female | 15-19 years | 95+ years | Data Rich  | 1         | 1     | Log-transformed SEV scalar: Lung C                     | 12              |
| Tracheal, bronchus, and lung cancer | Female | 15-19 years | 95+ years | Data Rich  | 1         | 1     | Cumulative Cigarettes (10 Years)                       | 15              |
| Tracheal, bronchus, and lung cancer | Female | 15-19 years | 95+ years | Data Rich  | 1         | 1     | Cumulative Cigarettes (15 Years)                       | 89              |
| Tracheal, bronchus, and lung cancer | Female | 15-19 years | 95+ years | Data Rich  | 1         | 1     | Cumulative Cigarettes (20 Years)                       | 120             |
| Tracheal, bronchus, and lung cancer | Female | 15-19 years | 95+ years | Data Rich  | 1         | 1     | Smoking Prevalence                                     | 167             |
| Tracheal, bronchus, and lung cancer | Female | 15-19 years | 95+ years | Data Rich  | 1         | 1     | Cumulative Cigarettes (5 Years)                        | 179             |
| Tracheal, bronchus, and lung cancer | Female | 15-19 years | 95+ years | Data Rich  | 1         | 1     | Asbestos consumption (metric tons per year per capita) | 429             |
| Tracheal, bronchus, and lung cancer | Female | 15-19 years | 95+ years | Data Rich  | 1         | 1     | Log-transformed age-standardized SEV scalar: Lung C    | 559             |
| Tracheal, bronchus, and lung cancer | Female | 15-19 years | 95+ years | Data Rich  | 1         | 1     | Secondhand smoke                                       | --              |
| Tracheal, bronchus, and lung cancer | Female | 15-19 years | 95+ years | Data Rich  | 1         | 1     | Tobacco (cigarettes per capita)                        | --              |
| Tracheal, bronchus, and lung cancer | Female | 15-19 years | 95+ years | Data Rich  | -1        | 2     | Healthcare access and quality index                    | --              |
| Tracheal, bronchus, and lung cancer | Female | 15-19 years | 95+ years | Data Rich  | 1         | 2     | Outdoor Air Pollution (PM2.5)                          | 0               |

**Appendix Table 9: CODEm covariates used, level of covariate, and expected direction of covariate by cause, sex, and age**

*Covariates that CODEm did not select during the covariate selection process have no draw counts listed.*

| Cause                               | Sex    | Age Start   | Age End   | Model Type | Direction | Level | Covariate Name                                         | Number of Draws |
|-------------------------------------|--------|-------------|-----------|------------|-----------|-------|--------------------------------------------------------|-----------------|
| Tracheal, bronchus, and lung cancer | Female | 15-19 years | 95+ years | Data Rich  | 1         | 2     | Diabetes Fasting Plasma Glucose (mmol/L)               | 605             |
| Tracheal, bronchus, and lung cancer | Female | 15-19 years | 95+ years | Data Rich  | 1         | 2     | Indoor Air Pollution (All Cooking Fuels)               | --              |
| Tracheal, bronchus, and lung cancer | Female | 15-19 years | 95+ years | Data Rich  | 1         | 2     | Residential radon                                      | --              |
| Tracheal, bronchus, and lung cancer | Female | 15-19 years | 95+ years | Data Rich  | -1        | 3     | Education (years per capita)                           | --              |
| Tracheal, bronchus, and lung cancer | Female | 15-19 years | 95+ years | Data Rich  | 0         | 3     | Socio-demographic Index                                | 571             |
| Tracheal, bronchus, and lung cancer | Female | 15-19 years | 95+ years | Data Rich  | 0         | 3     | LDI (I\$ per capita)                                   | --              |
| Tracheal, bronchus, and lung cancer | Female | 15-19 years | 95+ years | Global     | 1         | 1     | Asbestos consumption (metric tons per year per capita) | 0               |
| Tracheal, bronchus, and lung cancer | Female | 15-19 years | 95+ years | Global     | 1         | 1     | Secondhand smoke                                       | 0               |
| Tracheal, bronchus, and lung cancer | Female | 15-19 years | 95+ years | Global     | 1         | 1     | Cumulative Cigarettes (10 Years)                       | 27              |
| Tracheal, bronchus, and lung cancer | Female | 15-19 years | 95+ years | Global     | 1         | 1     | Cumulative Cigarettes (15 Years)                       | 27              |
| Tracheal, bronchus, and lung cancer | Female | 15-19 years | 95+ years | Global     | 1         | 1     | Cumulative Cigarettes (20 Years)                       | 71              |
| Tracheal, bronchus, and lung cancer | Female | 15-19 years | 95+ years | Global     | 1         | 1     | Cumulative Cigarettes (5 Years)                        | 163             |
| Tracheal, bronchus, and lung cancer | Female | 15-19 years | 95+ years | Global     | 1         | 1     | Smoking Prevalence                                     | 404             |
| Tracheal, bronchus, and lung cancer | Female | 15-19 years | 95+ years | Global     | 1         | 1     | Log-transformed SEV scalar: Lung C                     | 433             |
| Tracheal, bronchus, and lung cancer | Female | 15-19 years | 95+ years | Global     | 1         | 1     | Log-transformed age-standardized SEV scalar: Lung C    | 574             |
| Tracheal, bronchus, and lung cancer | Female | 15-19 years | 95+ years | Global     | 1         | 1     | Tobacco (cigarettes per capita)                        | --              |
| Tracheal, bronchus, and lung cancer | Female | 15-19 years | 95+ years | Global     | -1        | 2     | Healthcare access and quality index                    | --              |
| Tracheal, bronchus, and lung cancer | Female | 15-19 years | 95+ years | Global     | 1         | 2     | Outdoor Air Pollution (PM2.5)                          | 138             |
| Tracheal, bronchus, and lung cancer | Female | 15-19 years | 95+ years | Global     | 1         | 2     | Diabetes Fasting Plasma Glucose (mmol/L)               | 472             |
| Tracheal, bronchus, and lung cancer | Female | 15-19 years | 95+ years | Global     | 1         | 2     | Indoor Air Pollution (All Cooking Fuels)               | --              |
| Tracheal, bronchus, and lung cancer | Female | 15-19 years | 95+ years | Global     | 1         | 2     | Residential radon                                      | --              |
| Tracheal, bronchus, and lung cancer | Female | 15-19 years | 95+ years | Global     | -1        | 3     | Education (years per capita)                           | --              |
| Tracheal, bronchus, and lung cancer | Female | 15-19 years | 95+ years | Global     | 0         | 3     | Socio-demographic Index                                | 999             |
| Tracheal, bronchus, and lung cancer | Female | 15-19 years | 95+ years | Global     | 0         | 3     | LDI (I\$ per capita)                                   | --              |
| Tracheal, bronchus, and lung cancer | Male   | 15-19 years | 95+ years | Data Rich  | 1         | 1     | Smoking Prevalence                                     | 0               |
| Tracheal, bronchus, and lung cancer | Male   | 15-19 years | 95+ years | Data Rich  | 1         | 1     | Tobacco (cigarettes per capita)                        | 0               |
| Tracheal, bronchus, and lung cancer | Male   | 15-19 years | 95+ years | Data Rich  | 1         | 1     | Cumulative Cigarettes (5 Years)                        | 27              |
| Tracheal, bronchus, and lung cancer | Male   | 15-19 years | 95+ years | Data Rich  | 1         | 1     | Secondhand smoke                                       | 69              |
| Tracheal, bronchus, and lung cancer | Male   | 15-19 years | 95+ years | Data Rich  | 1         | 1     | Cumulative Cigarettes (10 Years)                       | 118             |
| Tracheal, bronchus, and lung cancer | Male   | 15-19 years | 95+ years | Data Rich  | 1         | 1     | Cumulative Cigarettes (20 Years)                       | 224             |
| Tracheal, bronchus, and lung cancer | Male   | 15-19 years | 95+ years | Data Rich  | 1         | 1     | Log-transformed SEV scalar: Lung C                     | 322             |
| Tracheal, bronchus, and lung cancer | Male   | 15-19 years | 95+ years | Data Rich  | 1         | 1     | Cumulative Cigarettes (15 Years)                       | 494             |
| Tracheal, bronchus, and lung cancer | Male   | 15-19 years | 95+ years | Data Rich  | 1         | 1     | Asbestos consumption (metric tons per year per capita) | 690             |
| Tracheal, bronchus, and lung cancer | Male   | 15-19 years | 95+ years | Data Rich  | -1        | 2     | Log-transformed age-standardized SEV scalar: Lung C    | 765             |
| Tracheal, bronchus, and lung cancer | Male   | 15-19 years | 95+ years | Data Rich  | -1        | 2     | Healthcare access and quality index                    | 0               |
| Tracheal, bronchus, and lung cancer | Male   | 15-19 years | 95+ years | Data Rich  | 1         | 2     | Outdoor Air Pollution (PM2.5)                          | 46              |
| Tracheal, bronchus, and lung cancer | Male   | 15-19 years | 95+ years | Data Rich  | 1         | 2     | Diabetes Fasting Plasma Glucose (mmol/L)               | 599             |
| Tracheal, bronchus, and lung cancer | Male   | 15-19 years | 95+ years | Data Rich  | 1         | 2     | Indoor Air Pollution (All Cooking Fuels)               | --              |
| Tracheal, bronchus, and lung cancer | Male   | 15-19 years | 95+ years | Data Rich  | 1         | 2     | Residential radon                                      | --              |
| Tracheal, bronchus, and lung cancer | Male   | 15-19 years | 95+ years | Data Rich  | -1        | 3     | Education (years per capita)                           | 547             |
| Tracheal, bronchus, and lung cancer | Male   | 15-19 years | 95+ years | Data Rich  | 0         | 3     | Socio-demographic Index                                | 673             |
| Tracheal, bronchus, and lung cancer | Male   | 15-19 years | 95+ years | Data Rich  | 0         | 3     | LDI (I\$ per capita)                                   | --              |
| Tracheal, bronchus, and lung cancer | Male   | 15-19 years | 95+ years | Global     | 1         | 1     | Tobacco (cigarettes per capita)                        | 63              |
| Tracheal, bronchus, and lung cancer | Male   | 15-19 years | 95+ years | Global     | 1         | 1     | Cumulative Cigarettes (15 Years)                       | 68              |
| Tracheal, bronchus, and lung cancer | Male   | 15-19 years | 95+ years | Global     | 1         | 1     | Smoking Prevalence                                     | 68              |
| Tracheal, bronchus, and lung cancer | Male   | 15-19 years | 95+ years | Global     | 1         | 1     | Cumulative Cigarettes (10 Years)                       | 231             |
| Tracheal, bronchus, and lung cancer | Male   | 15-19 years | 95+ years | Global     | 1         | 1     | Log-transformed SEV scalar: Lung C                     | 236             |
| Tracheal, bronchus, and lung cancer | Male   | 15-19 years | 95+ years | Global     | 1         | 1     | Cumulative Cigarettes (5 Years)                        | 239             |
| Tracheal, bronchus, and lung cancer | Male   | 15-19 years | 95+ years | Global     | 1         | 1     | Cumulative Cigarettes (20 Years)                       | 268             |
| Tracheal, bronchus, and lung cancer | Male   | 15-19 years | 95+ years | Global     | 1         | 1     | Asbestos consumption (metric tons per year per capita) | 361             |
| Tracheal, bronchus, and lung cancer | Male   | 15-19 years | 95+ years | Global     | 1         | 1     | Secondhand smoke                                       | 365             |
| Tracheal, bronchus, and lung cancer | Male   | 15-19 years | 95+ years | Global     | 1         | 1     | Log-transformed age-standardized SEV scalar: Lung C    | 369             |
| Tracheal, bronchus, and lung cancer | Male   | 15-19 years | 95+ years | Global     | -1        | 2     | Healthcare access and quality index                    | 0               |
| Tracheal, bronchus, and lung cancer | Male   | 15-19 years | 95+ years | Global     | 1         | 2     | Diabetes Fasting Plasma Glucose (mmol/L)               | 324             |
| Tracheal, bronchus, and lung cancer | Male   | 15-19 years | 95+ years | Global     | 1         | 2     | Outdoor Air Pollution (PM2.5)                          | 353             |
| Tracheal, bronchus, and lung cancer | Male   | 15-19 years | 95+ years | Global     | 1         | 2     | Indoor Air Pollution (All Cooking Fuels)               | --              |
| Tracheal, bronchus, and lung cancer | Male   | 15-19 years | 95+ years | Global     | 1         | 2     | Residential radon                                      | --              |
| Tracheal, bronchus, and lung cancer | Male   | 15-19 years | 95+ years | Global     | -1        | 3     | Education (years per capita)                           | 9               |
| Tracheal, bronchus, and lung cancer | Male   | 15-19 years | 95+ years | Global     | 0         | 3     | Socio-demographic Index                                | 538             |
| Tracheal, bronchus, and lung cancer | Male   | 15-19 years | 95+ years | Global     | 0         | 3     | LDI (I\$ per capita)                                   | --              |
| Malignant skin melanoma             | Female | 15-19 years | 95+ years | Data Rich  | 1         | 1     | Alcohol (liters per capita)                            | --              |
| Malignant skin melanoma             | Female | 15-19 years | 95+ years | Data Rich  | -1        | 2     | Latitude 30 to 45 (proportion)                         | 310             |
| Malignant skin melanoma             | Female | 15-19 years | 95+ years | Data Rich  | -1        | 2     | Healthcare access and quality index                    | --              |
| Malignant skin melanoma             | Female | 15-19 years | 95+ years | Data Rich  | -1        | 2     | Latitude Over 45 (proportion)                          | --              |
| Malignant skin melanoma             | Female | 15-19 years | 95+ years | Data Rich  | -1        | 2     | fruits adjusted(g)                                     | --              |
| Malignant skin melanoma             | Female | 15-19 years | 95+ years | Data Rich  | -1        | 2     | vegetables adjusted(g)                                 | --              |
| Malignant skin melanoma             | Female | 15-19 years | 95+ years | Data Rich  | 0         | 2     | Latitude Under 15 (proportion)                         | 367             |
| Malignant skin melanoma             | Female | 15-19 years | 95+ years | Data Rich  | 0         | 2     | Latitude 15 to 30 (proportion)                         | --              |
| Malignant skin melanoma             | Female | 15-19 years | 95+ years | Data Rich  | -1        | 3     | Education (years per capita)                           | --              |
| Malignant skin melanoma             | Female | 15-19 years | 95+ years | Data Rich  | 0         | 3     | Socio-demographic Index                                | 566             |
| Malignant skin melanoma             | Female | 15-19 years | 95+ years | Data Rich  | 0         | 3     | LDI (I\$ per capita)                                   | --              |
| Malignant skin melanoma             | Female | 15-19 years | 95+ years | Global     | 1         | 1     | Alcohol (liters per capita)                            | 181             |
| Malignant skin melanoma             | Female | 15-19 years | 95+ years | Global     | -1        | 2     | vegetables adjusted(g)                                 | 433             |
| Malignant skin melanoma             | Female | 15-19 years | 95+ years | Global     | -1        | 2     | Healthcare access and quality index                    | --              |
| Malignant skin melanoma             | Female | 15-19 years | 95+ years | Global     | -1        | 2     | Latitude 30 to 45 (proportion)                         | --              |
| Malignant skin melanoma             | Female | 15-19 years | 95+ years | Global     | -1        | 2     | Latitude Over 45 (proportion)                          | --              |
| Malignant skin melanoma             | Female | 15-19 years | 95+ years | Global     | -1        | 2     | fruits adjusted(g)                                     | --              |
| Malignant skin melanoma             | Female | 15-19 years | 95+ years | Global     | 0         | 2     | Latitude 15 to 30 (proportion)                         | 472             |



**Appendix Table 9: CODEm covariates used, level of covariate, and expected direction of covariate by cause, sex, and age**

*Covariates that CODEm did not select during the covariate selection process have no draw counts listed.*

| Cause                                              | Sex    | Age Start   | Age End   | Model Type | Direction | Level | Covariate Name                      | Number of Draws |
|----------------------------------------------------|--------|-------------|-----------|------------|-----------|-------|-------------------------------------|-----------------|
| Malignant skin melanoma                            | Female | 15-19 years | 95+ years | Global     | 0         | 2     | Latitude Under 15 (proportion)      | --              |
| Malignant skin melanoma                            | Female | 15-19 years | 95+ years | Global     | -1        | 3     | Education (years per capita)        | --              |
| Malignant skin melanoma                            | Female | 15-19 years | 95+ years | Global     | 0         | 3     | Socio-demographic Index             | 331             |
| Malignant skin melanoma                            | Female | 15-19 years | 95+ years | Global     | 0         | 3     | LDI (I\$ per capita)                | --              |
| Malignant skin melanoma                            | Male   | 15-19 years | 95+ years | Data Rich  | 1         | 1     | Alcohol (liters per capita)         | 224             |
| Malignant skin melanoma                            | Male   | 15-19 years | 95+ years | Data Rich  | -1        | 2     | Healthcare access and quality index | --              |
| Malignant skin melanoma                            | Male   | 15-19 years | 95+ years | Data Rich  | -1        | 2     | Latitude 30 to 45 (proportion)      | --              |
| Malignant skin melanoma                            | Male   | 15-19 years | 95+ years | Data Rich  | -1        | 2     | Latitude Over 45 (proportion)       | --              |
| Malignant skin melanoma                            | Male   | 15-19 years | 95+ years | Data Rich  | -1        | 2     | fruits adjusted(g)                  | --              |
| Malignant skin melanoma                            | Male   | 15-19 years | 95+ years | Data Rich  | -1        | 2     | vegetables adjusted(g)              | --              |
| Malignant skin melanoma                            | Male   | 15-19 years | 95+ years | Data Rich  | 0         | 2     | Latitude Under 15 (proportion)      | 520             |
| Malignant skin melanoma                            | Male   | 15-19 years | 95+ years | Data Rich  | 0         | 2     | Latitude 15 to 30 (proportion)      | --              |
| Malignant skin melanoma                            | Male   | 15-19 years | 95+ years | Data Rich  | -1        | 3     | Education (years per capita)        | --              |
| Malignant skin melanoma                            | Male   | 15-19 years | 95+ years | Data Rich  | 0         | 3     | Socio-demographic Index             | 362             |
| Malignant skin melanoma                            | Male   | 15-19 years | 95+ years | Data Rich  | 0         | 3     | LDI (I\$ per capita)                | --              |
| Malignant skin melanoma                            | Male   | 15-19 years | 95+ years | Global     | 1         | 1     | Alcohol (liters per capita)         | 1000            |
| Malignant skin melanoma                            | Male   | 15-19 years | 95+ years | Global     | -1        | 2     | Healthcare access and quality index | --              |
| Malignant skin melanoma                            | Male   | 15-19 years | 95+ years | Global     | -1        | 2     | Latitude 30 to 45 (proportion)      | --              |
| Malignant skin melanoma                            | Male   | 15-19 years | 95+ years | Global     | -1        | 2     | Latitude Over 45 (proportion)       | --              |
| Malignant skin melanoma                            | Male   | 15-19 years | 95+ years | Global     | -1        | 2     | fruits adjusted(g)                  | --              |
| Malignant skin melanoma                            | Male   | 15-19 years | 95+ years | Global     | -1        | 2     | vegetables adjusted(g)              | --              |
| Malignant skin melanoma                            | Male   | 15-19 years | 95+ years | Global     | 0         | 2     | Latitude Under 15 (proportion)      | 398             |
| Malignant skin melanoma                            | Male   | 15-19 years | 95+ years | Global     | 0         | 2     | Latitude 15 to 30 (proportion)      | --              |
| Malignant skin melanoma                            | Male   | 15-19 years | 95+ years | Global     | -1        | 3     | Education (years per capita)        | --              |
| Malignant skin melanoma                            | Male   | 15-19 years | 95+ years | Global     | 0         | 3     | LDI (I\$ per capita)                | --              |
| Malignant skin melanoma                            | Male   | 15-19 years | 95+ years | Global     | 0         | 3     | Socio-demographic Index             | --              |
| Non-melanoma skin cancer                           | Female | 15-19 years | 95+ years | Data Rich  | 1         | 1     | Cumulative Cigarettes (15 Years)    | 99              |
| Non-melanoma skin cancer                           | Female | 15-19 years | 95+ years | Data Rich  | 1         | 1     | Cumulative Cigarettes (10 Years)    | 182             |
| Non-melanoma skin cancer                           | Female | 15-19 years | 95+ years | Data Rich  | 1         | 1     | Smoking Prevalence                  | 353             |
| Non-melanoma skin cancer                           | Female | 15-19 years | 95+ years | Data Rich  | 1         | 1     | Cumulative Cigarettes (5 Years)     | 519             |
| Non-melanoma skin cancer                           | Female | 15-19 years | 95+ years | Data Rich  | -1        | 2     | Healthcare access and quality index | 355             |
| Non-melanoma skin cancer                           | Female | 15-19 years | 95+ years | Data Rich  | 0         | 2     | Average latitude                    | 215             |
| Non-melanoma skin cancer                           | Female | 15-19 years | 95+ years | Data Rich  | -1        | 3     | Education (years per capita)        | 262             |
| Non-melanoma skin cancer                           | Female | 15-19 years | 95+ years | Data Rich  | 0         | 3     | Socio-demographic Index             | 957             |
| Non-melanoma skin cancer                           | Female | 15-19 years | 95+ years | Data Rich  | 0         | 3     | LDI (I\$ per capita)                | --              |
| Non-melanoma skin cancer                           | Female | 15-19 years | 95+ years | Global     | 1         | 1     | Smoking Prevalence                  | 572             |
| Non-melanoma skin cancer                           | Female | 15-19 years | 95+ years | Global     | 1         | 1     | Cumulative Cigarettes (10 Years)    | --              |
| Non-melanoma skin cancer                           | Female | 15-19 years | 95+ years | Global     | 1         | 1     | Cumulative Cigarettes (15 Years)    | --              |
| Non-melanoma skin cancer                           | Female | 15-19 years | 95+ years | Global     | 1         | 1     | Cumulative Cigarettes (5 Years)     | --              |
| Non-melanoma skin cancer                           | Female | 15-19 years | 95+ years | Global     | -1        | 2     | Healthcare access and quality index | 282             |
| Non-melanoma skin cancer                           | Female | 15-19 years | 95+ years | Global     | 0         | 2     | Average latitude                    | 192             |
| Non-melanoma skin cancer                           | Female | 15-19 years | 95+ years | Global     | -1        | 3     | Education (years per capita)        | 107             |
| Non-melanoma skin cancer                           | Female | 15-19 years | 95+ years | Global     | 0         | 3     | Socio-demographic Index             | 465             |
| Non-melanoma skin cancer                           | Female | 15-19 years | 95+ years | Global     | 0         | 3     | LDI (I\$ per capita)                | --              |
| Non-melanoma skin cancer                           | Male   | 15-19 years | 95+ years | Data Rich  | 1         | 1     | Cumulative Cigarettes (5 Years)     | 73              |
| Non-melanoma skin cancer                           | Male   | 15-19 years | 95+ years | Data Rich  | 1         | 1     | Cumulative Cigarettes (10 Years)    | 130             |
| Non-melanoma skin cancer                           | Male   | 15-19 years | 95+ years | Data Rich  | 1         | 1     | Smoking Prevalence                  | 153             |
| Non-melanoma skin cancer                           | Male   | 15-19 years | 95+ years | Data Rich  | 1         | 1     | Cumulative Cigarettes (15 Years)    | 211             |
| Non-melanoma skin cancer                           | Male   | 15-19 years | 95+ years | Data Rich  | -1        | 2     | Healthcare access and quality index | 392             |
| Non-melanoma skin cancer                           | Male   | 15-19 years | 95+ years | Data Rich  | 0         | 2     | Average latitude                    | 778             |
| Non-melanoma skin cancer                           | Male   | 15-19 years | 95+ years | Data Rich  | -1        | 3     | Education (years per capita)        | 2               |
| Non-melanoma skin cancer                           | Male   | 15-19 years | 95+ years | Data Rich  | 0         | 3     | Socio-demographic Index             | 646             |
| Non-melanoma skin cancer                           | Male   | 15-19 years | 95+ years | Data Rich  | 0         | 3     | LDI (I\$ per capita)                | --              |
| Non-melanoma skin cancer                           | Male   | 15-19 years | 95+ years | Global     | 1         | 1     | Cumulative Cigarettes (5 Years)     | 70              |
| Non-melanoma skin cancer                           | Male   | 15-19 years | 95+ years | Global     | 1         | 1     | Cumulative Cigarettes (10 Years)    | 151             |
| Non-melanoma skin cancer                           | Male   | 15-19 years | 95+ years | Global     | 1         | 1     | Cumulative Cigarettes (15 Years)    | 237             |
| Non-melanoma skin cancer                           | Male   | 15-19 years | 95+ years | Global     | 1         | 1     | Smoking Prevalence                  | 473             |
| Non-melanoma skin cancer                           | Male   | 15-19 years | 95+ years | Global     | -1        | 2     | Healthcare access and quality index | 250             |
| Non-melanoma skin cancer                           | Male   | 15-19 years | 95+ years | Global     | 0         | 2     | Average latitude                    | 562             |
| Non-melanoma skin cancer                           | Male   | 15-19 years | 95+ years | Global     | -1        | 3     | Education (years per capita)        | 4               |
| Non-melanoma skin cancer                           | Male   | 15-19 years | 95+ years | Global     | 0         | 3     | Socio-demographic Index             | 605             |
| Non-melanoma skin cancer                           | Male   | 15-19 years | 95+ years | Global     | 0         | 3     | LDI (I\$ per capita)                | --              |
| Non-melanoma skin cancer (squamous-cell carcinoma) | Female | 28-364 days | 95+ years | Data Rich  | 1         | 1     | Cumulative Cigarettes (5 Years)     | 195             |
| Non-melanoma skin cancer (squamous-cell carcinoma) | Female | 28-364 days | 95+ years | Data Rich  | 1         | 1     | Cumulative Cigarettes (10 Years)    | 217             |
| Non-melanoma skin cancer (squamous-cell carcinoma) | Female | 28-364 days | 95+ years | Data Rich  | 1         | 1     | Cumulative Cigarettes (15 Years)    | 260             |
| Non-melanoma skin cancer (squamous-cell carcinoma) | Female | 28-364 days | 95+ years | Data Rich  | 1         | 1     | Smoking Prevalence                  | 264             |
| Non-melanoma skin cancer (squamous-cell carcinoma) | Female | 28-364 days | 95+ years | Data Rich  | -1        | 2     | Healthcare access and quality index | 516             |
| Non-melanoma skin cancer (squamous-cell carcinoma) | Female | 28-364 days | 95+ years | Data Rich  | 0         | 2     | Average latitude                    | 307             |
| Non-melanoma skin cancer (squamous-cell carcinoma) | Female | 28-364 days | 95+ years | Data Rich  | -1        | 3     | Education (years per capita)        | 30              |
| Non-melanoma skin cancer (squamous-cell carcinoma) | Female | 28-364 days | 95+ years | Data Rich  | 0         | 3     | Socio-demographic Index             | 501             |
| Non-melanoma skin cancer (squamous-cell carcinoma) | Female | 28-364 days | 95+ years | Data Rich  | 0         | 3     | LDI (I\$ per capita)                | 621             |
| Non-melanoma skin cancer (squamous-cell carcinoma) | Female | 28-364 days | 95+ years | Global     | 1         | 1     | Smoking Prevalence                  | 31              |
| Non-melanoma skin cancer (squamous-cell carcinoma) | Female | 28-364 days | 95+ years | Global     | 1         | 1     | Cumulative Cigarettes (10 Years)    | 150             |
| Non-melanoma skin cancer (squamous-cell carcinoma) | Female | 28-364 days | 95+ years | Global     | 1         | 1     | Cumulative Cigarettes (15 Years)    | 192             |
| Non-melanoma skin cancer (squamous-cell carcinoma) | Female | 28-364 days | 95+ years | Global     | 1         | 1     | Cumulative Cigarettes (5 Years)     | 198             |
| Non-melanoma skin cancer (squamous-cell carcinoma) | Female | 28-364 days | 95+ years | Global     | -1        | 2     | Healthcare access and quality index | 80              |
| Non-melanoma skin cancer (squamous-cell carcinoma) | Female | 28-364 days | 95+ years | Global     | 0         | 2     | Average latitude                    | 669             |
| Non-melanoma skin cancer (squamous-cell carcinoma) | Female | 28-364 days | 95+ years | Global     | -1        | 3     | Education (years per capita)        | 45              |



**Appendix Table 9: CODEm covariates used, level of covariate, and expected direction of covariate by cause, sex, and age**

*Covariates that CODEm did not select during the covariate selection process have no draw counts listed.*

| Cause                                              | Sex    | Age Start   | Age End   | Model Type | Direction | Level | Covariate Name                           | Number of Draws |
|----------------------------------------------------|--------|-------------|-----------|------------|-----------|-------|------------------------------------------|-----------------|
| Non-melanoma skin cancer (squamous-cell carcinoma) | Female | 28-364 days | 95+ years | Global     | 0         | 3     | Socio-demographic Index                  | 375             |
| Non-melanoma skin cancer (squamous-cell carcinoma) | Female | 28-364 days | 95+ years | Global     | 0         | 3     | LDI (I\$ per capita)                     | 501             |
| Non-melanoma skin cancer (squamous-cell carcinoma) | Male   | 28-364 days | 95+ years | Data Rich  | 1         | 1     | Cumulative Cigarettes (5 Years)          | 68              |
| Non-melanoma skin cancer (squamous-cell carcinoma) | Male   | 28-364 days | 95+ years | Data Rich  | 1         | 1     | Cumulative Cigarettes (10 Years)         | 116             |
| Non-melanoma skin cancer (squamous-cell carcinoma) | Male   | 28-364 days | 95+ years | Data Rich  | 1         | 1     | Smoking Prevalence                       | 211             |
| Non-melanoma skin cancer (squamous-cell carcinoma) | Male   | 28-364 days | 95+ years | Data Rich  | 1         | 1     | Cumulative Cigarettes (15 Years)         | 269             |
| Non-melanoma skin cancer (squamous-cell carcinoma) | Male   | 28-364 days | 95+ years | Data Rich  | -1        | 2     | Healthcare access and quality index      | 275             |
| Non-melanoma skin cancer (squamous-cell carcinoma) | Male   | 28-364 days | 95+ years | Data Rich  | 0         | 2     | Average latitude                         | 668             |
| Non-melanoma skin cancer (squamous-cell carcinoma) | Male   | 28-364 days | 95+ years | Data Rich  | -1        | 3     | Education (years per capita)             | 16              |
| Non-melanoma skin cancer (squamous-cell carcinoma) | Male   | 28-364 days | 95+ years | Data Rich  | 0         | 3     | LDI (I\$ per capita)                     | 412             |
| Non-melanoma skin cancer (squamous-cell carcinoma) | Male   | 28-364 days | 95+ years | Data Rich  | 0         | 3     | Socio-demographic Index                  | 649             |
| Non-melanoma skin cancer (squamous-cell carcinoma) | Male   | 28-364 days | 95+ years | Global     | 1         | 1     | Cumulative Cigarettes (10 Years)         | 141             |
| Non-melanoma skin cancer (squamous-cell carcinoma) | Male   | 28-364 days | 95+ years | Global     | 1         | 1     | Cumulative Cigarettes (5 Years)          | 153             |
| Non-melanoma skin cancer (squamous-cell carcinoma) | Male   | 28-364 days | 95+ years | Global     | 1         | 1     | Cumulative Cigarettes (15 Years)         | 473             |
| Non-melanoma skin cancer (squamous-cell carcinoma) | Male   | 28-364 days | 95+ years | Global     | 1         | 1     | Smoking Prevalence                       | 724             |
| Non-melanoma skin cancer (squamous-cell carcinoma) | Male   | 28-364 days | 95+ years | Global     | -1        | 2     | Healthcare access and quality index      | 292             |
| Non-melanoma skin cancer (squamous-cell carcinoma) | Male   | 28-364 days | 95+ years | Global     | 0         | 2     | Average latitude                         | 16              |
| Non-melanoma skin cancer (squamous-cell carcinoma) | Male   | 28-364 days | 95+ years | Global     | -1        | 3     | Education (years per capita)             | 15              |
| Non-melanoma skin cancer (squamous-cell carcinoma) | Male   | 28-364 days | 95+ years | Global     | 0         | 3     | Socio-demographic Index                  | 308             |
| Non-melanoma skin cancer (squamous-cell carcinoma) | Male   | 28-364 days | 95+ years | Global     | 0         | 3     | LDI (I\$ per capita)                     | 395             |
| Breast cancer                                      | Female | 15-19 years | 95+ years | Data Rich  | 1         | 1     | Mean BMI                                 | 388             |
| Breast cancer                                      | Female | 15-19 years | 95+ years | Data Rich  | 1         | 1     | Log-transformed SEV scalar: Breast C     | 647             |
| Breast cancer                                      | Female | 15-19 years | 95+ years | Data Rich  | 1         | 1     | Alcohol (liters per capita)              | 669             |
| Breast cancer                                      | Female | 15-19 years | 95+ years | Data Rich  | -1        | 2     | Healthcare access and quality index      | 0               |
| Breast cancer                                      | Female | 15-19 years | 95+ years | Data Rich  | -1        | 2     | vegetables adjusted(g)                   | 0               |
| Breast cancer                                      | Female | 15-19 years | 95+ years | Data Rich  | -1        | 2     | Total Fertility Rate                     | 626             |
| Breast cancer                                      | Female | 15-19 years | 95+ years | Data Rich  | -1        | 2     | Age-Specific Fertility Rate              | 811             |
| Breast cancer                                      | Female | 15-19 years | 95+ years | Data Rich  | -1        | 2     | fruits adjusted(g)                       | --              |
| Breast cancer                                      | Female | 15-19 years | 95+ years | Data Rich  | 1         | 2     | Secondhand smoke                         | 0               |
| Breast cancer                                      | Female | 15-19 years | 95+ years | Data Rich  | 1         | 2     | Smoking Prevalence                       | 0               |
| Breast cancer                                      | Female | 15-19 years | 95+ years | Data Rich  | 1         | 2     | Cumulative Cigarettes (10 Years)         | 2               |
| Breast cancer                                      | Female | 15-19 years | 95+ years | Data Rich  | 1         | 2     | Cumulative Cigarettes (5 Years)          | 40              |
| Breast cancer                                      | Female | 15-19 years | 95+ years | Data Rich  | 1         | 2     | Cumulative Cigarettes (15 Years)         | 140             |
| Breast cancer                                      | Female | 15-19 years | 95+ years | Data Rich  | 1         | 2     | Cumulative Cigarettes (20 Years)         | 350             |
| Breast cancer                                      | Female | 15-19 years | 95+ years | Data Rich  | 1         | 2     | Diabetes Fasting Plasma Glucose (mmol/L) | 814             |
| Breast cancer                                      | Female | 15-19 years | 95+ years | Data Rich  | -1        | 3     | Education (years per capita)             | 0               |
| Breast cancer                                      | Female | 15-19 years | 95+ years | Data Rich  | 0         | 3     | Socio-demographic Index                  | 0               |
| Breast cancer                                      | Female | 15-19 years | 95+ years | Data Rich  | 0         | 3     | LDI (I\$ per capita)                     | --              |
| Breast cancer                                      | Female | 15-19 years | 95+ years | Global     | 1         | 1     | Log-transformed SEV scalar: Breast C     | 255             |
| Breast cancer                                      | Female | 15-19 years | 95+ years | Global     | 1         | 1     | Mean BMI                                 | 289             |
| Breast cancer                                      | Female | 15-19 years | 95+ years | Global     | 1         | 1     | Alcohol (liters per capita)              | 694             |
| Breast cancer                                      | Female | 15-19 years | 95+ years | Global     | -1        | 2     | Healthcare access and quality index      | 203             |
| Breast cancer                                      | Female | 15-19 years | 95+ years | Global     | -1        | 2     | Age-Specific Fertility Rate              | 382             |
| Breast cancer                                      | Female | 15-19 years | 95+ years | Global     | -1        | 2     | vegetables adjusted(g)                   | 423             |
| Breast cancer                                      | Female | 15-19 years | 95+ years | Global     | -1        | 2     | Total Fertility Rate                     | 718             |
| Breast cancer                                      | Female | 15-19 years | 95+ years | Global     | -1        | 2     | fruits adjusted(g)                       | --              |
| Breast cancer                                      | Female | 15-19 years | 95+ years | Global     | 1         | 2     | Cumulative Cigarettes (5 Years)          | 155             |
| Breast cancer                                      | Female | 15-19 years | 95+ years | Global     | 1         | 2     | Cumulative Cigarettes (20 Years)         | 202             |
| Breast cancer                                      | Female | 15-19 years | 95+ years | Global     | 1         | 2     | Cumulative Cigarettes (10 Years)         | 219             |
| Breast cancer                                      | Female | 15-19 years | 95+ years | Global     | 1         | 2     | Cumulative Cigarettes (15 Years)         | 253             |
| Breast cancer                                      | Female | 15-19 years | 95+ years | Global     | 1         | 2     | Diabetes Fasting Plasma Glucose (mmol/L) | 329             |
| Breast cancer                                      | Female | 15-19 years | 95+ years | Global     | 1         | 2     | Smoking Prevalence                       | 488             |
| Breast cancer                                      | Female | 15-19 years | 95+ years | Global     | 1         | 2     | Secondhand smoke                         | --              |
| Breast cancer                                      | Female | 15-19 years | 95+ years | Global     | -1        | 3     | Education (years per capita)             | 8               |
| Breast cancer                                      | Female | 15-19 years | 95+ years | Global     | 0         | 3     | Socio-demographic Index                  | 269             |
| Breast cancer                                      | Female | 15-19 years | 95+ years | Global     | 0         | 3     | LDI (I\$ per capita)                     | --              |
| Breast cancer                                      | Male   | 15-19 years | 95+ years | Data Rich  | 1         | 1     | Log-transformed SEV scalar: Breast C     | 613             |
| Breast cancer                                      | Male   | 15-19 years | 95+ years | Data Rich  | 1         | 1     | Mean BMI                                 | 784             |
| Breast cancer                                      | Male   | 15-19 years | 95+ years | Data Rich  | 1         | 1     | Alcohol (liters per capita)              | --              |
| Breast cancer                                      | Male   | 15-19 years | 95+ years | Data Rich  | -1        | 2     | Healthcare access and quality index      | 21              |
| Breast cancer                                      | Male   | 15-19 years | 95+ years | Data Rich  | -1        | 2     | fruits adjusted(g)                       | 64              |
| Breast cancer                                      | Male   | 15-19 years | 95+ years | Data Rich  | -1        | 2     | vegetables adjusted(g)                   | --              |
| Breast cancer                                      | Male   | 15-19 years | 95+ years | Data Rich  | 1         | 2     | Cumulative Cigarettes (15 Years)         | 10              |
| Breast cancer                                      | Male   | 15-19 years | 95+ years | Data Rich  | 1         | 2     | Cumulative Cigarettes (10 Years)         | 12              |
| Breast cancer                                      | Male   | 15-19 years | 95+ years | Data Rich  | 1         | 2     | Secondhand smoke                         | 17              |
| Breast cancer                                      | Male   | 15-19 years | 95+ years | Data Rich  | 1         | 2     | Cumulative Cigarettes (5 Years)          | 24              |
| Breast cancer                                      | Male   | 15-19 years | 95+ years | Data Rich  | 1         | 2     | Smoking Prevalence                       | 34              |
| Breast cancer                                      | Male   | 15-19 years | 95+ years | Data Rich  | 1         | 2     | Diabetes Fasting Plasma Glucose (mmol/L) | 356             |
| Breast cancer                                      | Male   | 15-19 years | 95+ years | Data Rich  | 1         | 2     | Cumulative Cigarettes (20 Years)         | --              |
| Breast cancer                                      | Male   | 15-19 years | 95+ years | Data Rich  | -1        | 3     | Education (years per capita)             | 9               |
| Breast cancer                                      | Male   | 15-19 years | 95+ years | Data Rich  | 0         | 3     | Socio-demographic Index                  | 94              |
| Breast cancer                                      | Male   | 15-19 years | 95+ years | Data Rich  | 0         | 3     | LDI (I\$ per capita)                     | --              |
| Breast cancer                                      | Male   | 15-19 years | 95+ years | Global     | 1         | 1     | Mean BMI                                 | 541             |
| Breast cancer                                      | Male   | 15-19 years | 95+ years | Global     | 1         | 1     | Log-transformed SEV scalar: Breast C     | 689             |
| Breast cancer                                      | Male   | 15-19 years | 95+ years | Global     | 1         | 1     | Alcohol (liters per capita)              | --              |
| Breast cancer                                      | Male   | 15-19 years | 95+ years | Global     | -1        | 2     | Healthcare access and quality index      | 248             |
| Breast cancer                                      | Male   | 15-19 years | 95+ years | Global     | -1        | 2     | fruits adjusted(g)                       | --              |
| Breast cancer                                      | Male   | 15-19 years | 95+ years | Global     | -1        | 2     | vegetables adjusted(g)                   | --              |

**Appendix Table 9: CODEm covariates used, level of covariate, and expected direction of covariate by cause, sex, and age**  
*Covariates that CODEm did not select during the covariate selection process have no draw counts listed.*

| Cause           | Sex    | Age Start   | Age End   | Model Type | Direction | Level | Covariate Name                                    | Number of Draws |
|-----------------|--------|-------------|-----------|------------|-----------|-------|---------------------------------------------------|-----------------|
| Breast cancer   | Male   | 15-19 years | 95+ years | Global     | 1         | 2     | Cumulative Cigarettes (5 Years)                   | 10              |
| Breast cancer   | Male   | 15-19 years | 95+ years | Global     | 1         | 2     | Cumulative Cigarettes (10 Years)                  | 25              |
| Breast cancer   | Male   | 15-19 years | 95+ years | Global     | 1         | 2     | Cumulative Cigarettes (15 Years)                  | 96              |
| Breast cancer   | Male   | 15-19 years | 95+ years | Global     | 1         | 2     | Smoking Prevalence                                | 112             |
| Breast cancer   | Male   | 15-19 years | 95+ years | Global     | 1         | 2     | Cumulative Cigarettes (20 Years)                  | 177             |
| Breast cancer   | Male   | 15-19 years | 95+ years | Global     | 1         | 2     | Secondhand smoke                                  | 221             |
| Breast cancer   | Male   | 15-19 years | 95+ years | Global     | 1         | 2     | Diabetes Fasting Plasma Glucose (mmol/L)          | 603             |
| Breast cancer   | Male   | 15-19 years | 95+ years | Global     | -1        | 3     | Education (years per capita)                      | 153             |
| Breast cancer   | Male   | 15-19 years | 95+ years | Global     | 0         | 3     | Socio-demographic Index                           | 159             |
| Breast cancer   | Male   | 15-19 years | 95+ years | Global     | 0         | 3     | LDI (I\$ per capita)                              | --              |
| Cervical cancer | Female | 15-19 years | 95+ years | Data Rich  | 1         | 1     | Cumulative Cigarettes (5 Years)                   | 348             |
| Cervical cancer | Female | 15-19 years | 95+ years | Data Rich  | 1         | 1     | Cumulative Cigarettes (10 Years)                  | 633             |
| Cervical cancer | Female | 15-19 years | 95+ years | Data Rich  | 1         | 1     | Cumulative Cigarettes (15 Years)                  | --              |
| Cervical cancer | Female | 15-19 years | 95+ years | Data Rich  | 1         | 1     | HIV age-standardized prevalence                   | --              |
| Cervical cancer | Female | 15-19 years | 95+ years | Data Rich  | -1        | 2     | fruits adjusted(g)                                | 139             |
| Cervical cancer | Female | 15-19 years | 95+ years | Data Rich  | -1        | 2     | vegetables adjusted(g)                            | 216             |
| Cervical cancer | Female | 15-19 years | 95+ years | Data Rich  | -1        | 2     | Healthcare access and quality index               | 465             |
| Cervical cancer | Female | 15-19 years | 95+ years | Data Rich  | 1         | 2     | Age-Specific Fertility Rate                       | 4               |
| Cervical cancer | Female | 15-19 years | 95+ years | Data Rich  | 1         | 2     | Total Fertility Rate                              | 243             |
| Cervical cancer | Female | 15-19 years | 95+ years | Data Rich  | 1         | 2     | Smoking Prevalence                                | 300             |
| Cervical cancer | Female | 15-19 years | 95+ years | Data Rich  | -1        | 3     | Education (years per capita)                      | 474             |
| Cervical cancer | Female | 15-19 years | 95+ years | Data Rich  | 0         | 3     | Socio-demographic Index                           | 295             |
| Cervical cancer | Female | 15-19 years | 95+ years | Data Rich  | 0         | 3     | LDI (I\$ per capita)                              | --              |
| Cervical cancer | Female | 15-19 years | 95+ years | Global     | 1         | 1     | Cumulative Cigarettes (5 Years)                   | 487             |
| Cervical cancer | Female | 15-19 years | 95+ years | Global     | 1         | 1     | Cumulative Cigarettes (15 Years)                  | 513             |
| Cervical cancer | Female | 15-19 years | 95+ years | Global     | 1         | 1     | Cumulative Cigarettes (10 Years)                  | --              |
| Cervical cancer | Female | 15-19 years | 95+ years | Global     | 1         | 1     | HIV age-standardized prevalence                   | --              |
| Cervical cancer | Female | 15-19 years | 95+ years | Global     | -1        | 2     | vegetables adjusted(g)                            | 9               |
| Cervical cancer | Female | 15-19 years | 95+ years | Global     | -1        | 2     | fruits adjusted(g)                                | 15              |
| Cervical cancer | Female | 15-19 years | 95+ years | Global     | -1        | 2     | Healthcare access and quality index               | 295             |
| Cervical cancer | Female | 15-19 years | 95+ years | Global     | 1         | 2     | Age-Specific Fertility Rate                       | 15              |
| Cervical cancer | Female | 15-19 years | 95+ years | Global     | 1         | 2     | Total Fertility Rate                              | 369             |
| Cervical cancer | Female | 15-19 years | 95+ years | Global     | 1         | 2     | Smoking Prevalence                                | --              |
| Cervical cancer | Female | 15-19 years | 95+ years | Global     | -1        | 3     | Education (years per capita)                      | 362             |
| Cervical cancer | Female | 15-19 years | 95+ years | Global     | 0         | 3     | Socio-demographic Index                           | 302             |
| Cervical cancer | Female | 15-19 years | 95+ years | Global     | 0         | 3     | LDI (I\$ per capita)                              | --              |
| Uterine cancer  | Female | 15-19 years | 95+ years | Data Rich  | 1         | 1     | Mean BMI                                          | 369             |
| Uterine cancer  | Female | 15-19 years | 95+ years | Data Rich  | 1         | 1     | Log-transformed SEV scalar: Uterus C              | 626             |
| Uterine cancer  | Female | 15-19 years | 95+ years | Data Rich  | -1        | 2     | fruits adjusted(g)                                | 35              |
| Uterine cancer  | Female | 15-19 years | 95+ years | Data Rich  | -1        | 2     | Healthcare access and quality index               | 43              |
| Uterine cancer  | Female | 15-19 years | 95+ years | Data Rich  | -1        | 2     | vegetables adjusted(g)                            | 655             |
| Uterine cancer  | Female | 15-19 years | 95+ years | Data Rich  | 0         | 2     | Total Fertility Rate                              | 674             |
| Uterine cancer  | Female | 15-19 years | 95+ years | Data Rich  | 1         | 2     | Cumulative Cigarettes (10 Years)                  | 2               |
| Uterine cancer  | Female | 15-19 years | 95+ years | Data Rich  | 1         | 2     | Smoking Prevalence                                | 2               |
| Uterine cancer  | Female | 15-19 years | 95+ years | Data Rich  | 1         | 2     | Cumulative Cigarettes (5 Years)                   | 5               |
| Uterine cancer  | Female | 15-19 years | 95+ years | Data Rich  | 1         | 2     | Tobacco (cigarettes per capita)                   | 52              |
| Uterine cancer  | Female | 15-19 years | 95+ years | Data Rich  | 1         | 2     | Diabetes Age-Standardized Prevalence (proportion) | --              |
| Uterine cancer  | Female | 15-19 years | 95+ years | Data Rich  | -1        | 3     | Education (years per capita)                      | 1               |
| Uterine cancer  | Female | 15-19 years | 95+ years | Data Rich  | 0         | 3     | Socio-demographic Index                           | 20              |
| Uterine cancer  | Female | 15-19 years | 95+ years | Data Rich  | 0         | 3     | LDI (I\$ per capita)                              | --              |
| Uterine cancer  | Female | 15-19 years | 95+ years | Global     | 1         | 1     | Log-transformed SEV scalar: Uterus C              | 257             |
| Uterine cancer  | Female | 15-19 years | 95+ years | Global     | 1         | 1     | Mean BMI                                          | 368             |
| Uterine cancer  | Female | 15-19 years | 95+ years | Global     | -1        | 2     | fruits adjusted(g)                                | 265             |
| Uterine cancer  | Female | 15-19 years | 95+ years | Global     | -1        | 2     | Healthcare access and quality index               | 267             |
| Uterine cancer  | Female | 15-19 years | 95+ years | Global     | -1        | 2     | vegetables adjusted(g)                            | 269             |
| Uterine cancer  | Female | 15-19 years | 95+ years | Global     | 0         | 2     | Total Fertility Rate                              | 340             |
| Uterine cancer  | Female | 15-19 years | 95+ years | Global     | 1         | 2     | Smoking Prevalence                                | 14              |
| Uterine cancer  | Female | 15-19 years | 95+ years | Global     | 1         | 2     | Cumulative Cigarettes (10 Years)                  | 17              |
| Uterine cancer  | Female | 15-19 years | 95+ years | Global     | 1         | 2     | Cumulative Cigarettes (5 Years)                   | 28              |
| Uterine cancer  | Female | 15-19 years | 95+ years | Global     | 1         | 2     | Tobacco (cigarettes per capita)                   | 294             |
| Uterine cancer  | Female | 15-19 years | 95+ years | Global     | 1         | 2     | Diabetes Age-Standardized Prevalence (proportion) | --              |
| Uterine cancer  | Female | 15-19 years | 95+ years | Global     | -1        | 3     | Education (years per capita)                      | 33              |
| Uterine cancer  | Female | 15-19 years | 95+ years | Global     | 0         | 3     | Socio-demographic Index                           | 144             |
| Uterine cancer  | Female | 15-19 years | 95+ years | Global     | 0         | 3     | LDI (I\$ per capita)                              | --              |
| Ovarian cancer  | Female | 15-19 years | 95+ years | Data Rich  | -1        | 1     | Contraception (Modern) Prevalence (proportion)    | --              |
| Ovarian cancer  | Female | 15-19 years | 95+ years | Data Rich  | 1         | 1     | Tobacco (cigarettes per capita)                   | 0               |
| Ovarian cancer  | Female | 15-19 years | 95+ years | Data Rich  | 1         | 1     | Cumulative Cigarettes (20 Years)                  | 1               |
| Ovarian cancer  | Female | 15-19 years | 95+ years | Data Rich  | 1         | 1     | Cumulative Cigarettes (15 Years)                  | 8               |
| Ovarian cancer  | Female | 15-19 years | 95+ years | Data Rich  | 1         | 1     | Cumulative Cigarettes (10 Years)                  | 90              |
| Ovarian cancer  | Female | 15-19 years | 95+ years | Data Rich  | 1         | 1     | Cumulative Cigarettes (5 Years)                   | 230             |
| Ovarian cancer  | Female | 15-19 years | 95+ years | Data Rich  | 1         | 1     | Log-transformed SEV scalar: Ovary C               | 827             |
| Ovarian cancer  | Female | 15-19 years | 95+ years | Data Rich  | 1         | 1     | Alcohol (liters per capita)                       | --              |
| Ovarian cancer  | Female | 15-19 years | 95+ years | Data Rich  | -1        | 2     | fruits adjusted(g)                                | 95              |
| Ovarian cancer  | Female | 15-19 years | 95+ years | Data Rich  | -1        | 2     | vegetables adjusted(g)                            | 123             |
| Ovarian cancer  | Female | 15-19 years | 95+ years | Data Rich  | -1        | 2     | Healthcare access and quality index               | --              |
| Ovarian cancer  | Female | 15-19 years | 95+ years | Data Rich  | 0         | 2     | Total Fertility Rate                              | 285             |
| Ovarian cancer  | Female | 15-19 years | 95+ years | Data Rich  | 1         | 2     | energy unadjusted(kcal)                           | 0               |
| Ovarian cancer  | Female | 15-19 years | 95+ years | Data Rich  | 1         | 2     | Diabetes Fasting Plasma Glucose (mmol/L)          | 95              |

**Appendix Table 9: CODEm covariates used, level of covariate, and expected direction of covariate by cause, sex, and age**

*Covariates that CODEm did not select during the covariate selection process have no draw counts listed.*

| Cause             | Sex    | Age Start   | Age End   | Model Type | Direction | Level | Covariate Name                                         | Number of Draws |
|-------------------|--------|-------------|-----------|------------|-----------|-------|--------------------------------------------------------|-----------------|
| Ovarian cancer    | Female | 15-19 years | 95+ years | Data Rich  | 1         | 2     | Asbestos consumption (metric tons per year per capita) | 329             |
| Ovarian cancer    | Female | 15-19 years | 95+ years | Data Rich  | 1         | 2     | Diabetes Age-Standardized Prevalence (proportion)      | 329             |
| Ovarian cancer    | Female | 15-19 years | 95+ years | Data Rich  | 1         | 2     | Smoking Prevalence                                     | 329             |
| Ovarian cancer    | Female | 15-19 years | 95+ years | Data Rich  | 1         | 2     | Mean BMI                                               | 371             |
| Ovarian cancer    | Female | 15-19 years | 95+ years | Data Rich  | -1        | 3     | Education (years per capita)                           | 56              |
| Ovarian cancer    | Female | 15-19 years | 95+ years | Data Rich  | 0         | 3     | Socio-demographic Index                                | 429             |
| Ovarian cancer    | Female | 15-19 years | 95+ years | Data Rich  | 0         | 3     | LDI (IS per capita)                                    | --              |
| Ovarian cancer    | Female | 15-19 years | 95+ years | Global     | -1        | 1     | Contraception (Modern) Prevalence (proportion)         | --              |
| Ovarian cancer    | Female | 15-19 years | 95+ years | Global     | 1         | 1     | Tobacco (cigarettes per capita)                        | 6               |
| Ovarian cancer    | Female | 15-19 years | 95+ years | Global     | 1         | 1     | Cumulative Cigarettes (5 Years)                        | 52              |
| Ovarian cancer    | Female | 15-19 years | 95+ years | Global     | 1         | 1     | Cumulative Cigarettes (10 Years)                       | 66              |
| Ovarian cancer    | Female | 15-19 years | 95+ years | Global     | 1         | 1     | Cumulative Cigarettes (15 Years)                       | 223             |
| Ovarian cancer    | Female | 15-19 years | 95+ years | Global     | 1         | 1     | Cumulative Cigarettes (20 Years)                       | 325             |
| Ovarian cancer    | Female | 15-19 years | 95+ years | Global     | 1         | 1     | Log-transformed SEV scalar: Ovary C                    | 819             |
| Ovarian cancer    | Female | 15-19 years | 95+ years | Global     | 1         | 1     | Alcohol (liters per capita)                            | --              |
| Ovarian cancer    | Female | 15-19 years | 95+ years | Global     | -1        | 2     | Healthcare access and quality index                    | --              |
| Ovarian cancer    | Female | 15-19 years | 95+ years | Global     | -1        | 2     | fruits adjusted(g)                                     | --              |
| Ovarian cancer    | Female | 15-19 years | 95+ years | Global     | -1        | 2     | vegetables adjusted(g)                                 | --              |
| Ovarian cancer    | Female | 15-19 years | 95+ years | Global     | 0         | 2     | Total Fertility Rate                                   | 216             |
| Ovarian cancer    | Female | 15-19 years | 95+ years | Global     | 1         | 2     | energy unadjusted(kcal)                                | 12              |
| Ovarian cancer    | Female | 15-19 years | 95+ years | Global     | 1         | 2     | Smoking Prevalence                                     | 42              |
| Ovarian cancer    | Female | 15-19 years | 95+ years | Global     | 1         | 2     | Diabetes Fasting Plasma Glucose (mmol/L)               | 290             |
| Ovarian cancer    | Female | 15-19 years | 95+ years | Global     | 1         | 2     | Diabetes Age-Standardized Prevalence (proportion)      | 300             |
| Ovarian cancer    | Female | 15-19 years | 95+ years | Global     | 1         | 2     | Mean BMI                                               | 323             |
| Ovarian cancer    | Female | 15-19 years | 95+ years | Global     | 1         | 2     | Asbestos consumption (metric tons per year per capita) | 400             |
| Ovarian cancer    | Female | 15-19 years | 95+ years | Global     | -1        | 3     | Education (years per capita)                           | 77              |
| Ovarian cancer    | Female | 15-19 years | 95+ years | Global     | 0         | 3     | Socio-demographic Index                                | 576             |
| Ovarian cancer    | Female | 15-19 years | 95+ years | Global     | 0         | 3     | LDI (IS per capita)                                    | --              |
| Prostate cancer   | Male   | 15-19 years | 95+ years | Data Rich  | 1         | 1     | Log-transformed SEV scalar: Prostate C                 | 810             |
| Prostate cancer   | Male   | 15-19 years | 95+ years | Data Rich  | -1        | 2     | Healthcare access and quality index                    | --              |
| Prostate cancer   | Male   | 15-19 years | 95+ years | Data Rich  | 1         | 2     | Smoking Prevalence                                     | --              |
| Prostate cancer   | Male   | 15-19 years | 95+ years | Data Rich  | -1        | 3     | Education (years per capita)                           | --              |
| Prostate cancer   | Male   | 15-19 years | 95+ years | Data Rich  | 0         | 3     | Socio-demographic Index                                | 692             |
| Prostate cancer   | Male   | 15-19 years | 95+ years | Data Rich  | 0         | 3     | LDI (IS per capita)                                    | --              |
| Prostate cancer   | Male   | 15-19 years | 95+ years | Global     | 1         | 1     | Log-transformed SEV scalar: Prostate C                 | 924             |
| Prostate cancer   | Male   | 15-19 years | 95+ years | Global     | -1        | 2     | Healthcare access and quality index                    | 352             |
| Prostate cancer   | Male   | 15-19 years | 95+ years | Global     | 1         | 2     | Smoking Prevalence                                     | 218             |
| Prostate cancer   | Male   | 15-19 years | 95+ years | Global     | -1        | 3     | Education (years per capita)                           | --              |
| Prostate cancer   | Male   | 15-19 years | 95+ years | Global     | 0         | 3     | Socio-demographic Index                                | 504             |
| Prostate cancer   | Male   | 15-19 years | 95+ years | Global     | 0         | 3     | LDI (IS per capita)                                    | --              |
| Testicular cancer | Male   | 15-19 years | 95+ years | Data Rich  | -1        | 2     | Healthcare access and quality index                    | 0               |
| Testicular cancer | Male   | 15-19 years | 95+ years | Data Rich  | -1        | 2     | vegetables adjusted(g)                                 | 440             |
| Testicular cancer | Male   | 15-19 years | 95+ years | Data Rich  | -1        | 2     | fruits adjusted(g)                                     | --              |
| Testicular cancer | Male   | 15-19 years | 95+ years | Data Rich  | 1         | 2     | Cumulative Cigarettes (5 Years)                        | 4               |
| Testicular cancer | Male   | 15-19 years | 95+ years | Data Rich  | 1         | 2     | Cumulative Cigarettes (15 Years)                       | 11              |
| Testicular cancer | Male   | 15-19 years | 95+ years | Data Rich  | 1         | 2     | Cumulative Cigarettes (20 Years)                       | 18              |
| Testicular cancer | Male   | 15-19 years | 95+ years | Data Rich  | 1         | 2     | Cumulative Cigarettes (10 Years)                       | 40              |
| Testicular cancer | Male   | 15-19 years | 95+ years | Data Rich  | 1         | 2     | Smoking Prevalence                                     | 99              |
| Testicular cancer | Male   | 15-19 years | 95+ years | Data Rich  | 1         | 2     | Tobacco (cigarettes per capita)                        | 893             |
| Testicular cancer | Male   | 15-19 years | 95+ years | Data Rich  | -1        | 3     | Education (years per capita)                           | 280             |
| Testicular cancer | Male   | 15-19 years | 95+ years | Data Rich  | 0         | 3     | Socio-demographic Index                                | 695             |
| Testicular cancer | Male   | 15-19 years | 95+ years | Data Rich  | 0         | 3     | LDI (IS per capita)                                    | --              |
| Testicular cancer | Male   | 15-19 years | 95+ years | Global     | -1        | 2     | Healthcare access and quality index                    | 66              |
| Testicular cancer | Male   | 15-19 years | 95+ years | Global     | -1        | 2     | vegetables adjusted(g)                                 | 375             |
| Testicular cancer | Male   | 15-19 years | 95+ years | Global     | -1        | 2     | fruits adjusted(g)                                     | --              |
| Testicular cancer | Male   | 15-19 years | 95+ years | Global     | 1         | 2     | Cumulative Cigarettes (15 Years)                       | 71              |
| Testicular cancer | Male   | 15-19 years | 95+ years | Global     | 1         | 2     | Cumulative Cigarettes (5 Years)                        | 152             |
| Testicular cancer | Male   | 15-19 years | 95+ years | Global     | 1         | 2     | Cumulative Cigarettes (20 Years)                       | 201             |
| Testicular cancer | Male   | 15-19 years | 95+ years | Global     | 1         | 2     | Cumulative Cigarettes (10 Years)                       | 217             |
| Testicular cancer | Male   | 15-19 years | 95+ years | Global     | 1         | 2     | Tobacco (cigarettes per capita)                        | 316             |
| Testicular cancer | Male   | 15-19 years | 95+ years | Global     | 1         | 2     | Smoking Prevalence                                     | 322             |
| Testicular cancer | Male   | 15-19 years | 95+ years | Global     | -1        | 3     | Education (years per capita)                           | 60              |
| Testicular cancer | Male   | 15-19 years | 95+ years | Global     | 0         | 3     | Socio-demographic Index                                | 221             |
| Testicular cancer | Male   | 15-19 years | 95+ years | Global     | 0         | 3     | LDI (IS per capita)                                    | --              |
| Kidney cancer     | Female | 0-6 days    | 95+ years | Data Rich  | 1         | 1     | Mean BMI                                               | 433             |
| Kidney cancer     | Female | 0-6 days    | 95+ years | Data Rich  | 1         | 1     | Log-transformed SEV scalar: Kidney C                   | 567             |
| Kidney cancer     | Female | 0-6 days    | 95+ years | Data Rich  | 1         | 1     | Cumulative Cigarettes (10 Years)                       | --              |
| Kidney cancer     | Female | 0-6 days    | 95+ years | Data Rich  | 1         | 1     | Cumulative Cigarettes (15 Years)                       | --              |
| Kidney cancer     | Female | 0-6 days    | 95+ years | Data Rich  | 1         | 1     | Cumulative Cigarettes (5 Years)                        | --              |
| Kidney cancer     | Female | 0-6 days    | 95+ years | Data Rich  | -1        | 2     | Healthcare access and quality index                    | 266             |
| Kidney cancer     | Female | 0-6 days    | 95+ years | Data Rich  | 1         | 2     | Alcohol (liters per capita)                            | 313             |
| Kidney cancer     | Female | 0-6 days    | 95+ years | Data Rich  | 1         | 2     | Diabetes Age-Standardized Prevalence (proportion)      | --              |
| Kidney cancer     | Female | 0-6 days    | 95+ years | Data Rich  | 1         | 2     | Smoking Prevalence                                     | --              |
| Kidney cancer     | Female | 0-6 days    | 95+ years | Data Rich  | 1         | 2     | Systolic Blood Pressure (mmHg)                         | --              |
| Kidney cancer     | Female | 0-6 days    | 95+ years | Data Rich  | -1        | 3     | Education (years per capita)                           | --              |
| Kidney cancer     | Female | 0-6 days    | 95+ years | Data Rich  | 0         | 3     | Socio-demographic Index                                | 374             |
| Kidney cancer     | Female | 0-6 days    | 95+ years | Data Rich  | 0         | 3     | LDI (IS per capita)                                    | --              |
| Kidney cancer     | Female | 0-6 days    | 95+ years | Global     | 1         | 1     | Mean BMI                                               | 395             |

**Appendix Table 9: CODEm covariates used, level of covariate, and expected direction of covariate by cause, sex, and age**

*Covariates that CODEm did not select during the covariate selection process have no draw counts listed.*

| Cause          | Sex    | Age Start   | Age End   | Model Type | Direction | Level | Covariate Name                                    | Number of Draws |
|----------------|--------|-------------|-----------|------------|-----------|-------|---------------------------------------------------|-----------------|
| Kidney cancer  | Female | 0-6 days    | 95+ years | Global     | 1         | 1     | Log-transformed SEV scalar: Kidney C              | 914             |
| Kidney cancer  | Female | 0-6 days    | 95+ years | Global     | 1         | 1     | Cumulative Cigarettes (10 Years)                  | --              |
| Kidney cancer  | Female | 0-6 days    | 95+ years | Global     | 1         | 1     | Cumulative Cigarettes (15 Years)                  | --              |
| Kidney cancer  | Female | 0-6 days    | 95+ years | Global     | 1         | 1     | Cumulative Cigarettes (5 Years)                   | --              |
| Kidney cancer  | Female | 0-6 days    | 95+ years | Global     | -1        | 2     | Healthcare access and quality index               | --              |
| Kidney cancer  | Female | 0-6 days    | 95+ years | Global     | 1         | 2     | Diabetes Age-Standardized Prevalence (proportion) | 80              |
| Kidney cancer  | Female | 0-6 days    | 95+ years | Global     | 1         | 2     | Alcohol (liters per capita)                       | 263             |
| Kidney cancer  | Female | 0-6 days    | 95+ years | Global     | 1         | 2     | Smoking Prevalence                                | --              |
| Kidney cancer  | Female | 0-6 days    | 95+ years | Global     | 1         | 2     | Systolic Blood Pressure (mmHg)                    | --              |
| Kidney cancer  | Female | 0-6 days    | 95+ years | Global     | -1        | 3     | Education (years per capita)                      | --              |
| Kidney cancer  | Female | 0-6 days    | 95+ years | Global     | 0         | 3     | Socio-demographic Index                           | 404             |
| Kidney cancer  | Female | 0-6 days    | 95+ years | Global     | 0         | 3     | LDI (I\$ per capita)                              | --              |
| Kidney cancer  | Male   | 0-6 days    | 95+ years | Data Rich  | 1         | 1     | Mean BMI                                          | 607             |
| Kidney cancer  | Male   | 0-6 days    | 95+ years | Data Rich  | 1         | 1     | Log-transformed SEV scalar: Kidney C              | 937             |
| Kidney cancer  | Male   | 0-6 days    | 95+ years | Data Rich  | 1         | 1     | Cumulative Cigarettes (10 Years)                  | --              |
| Kidney cancer  | Male   | 0-6 days    | 95+ years | Data Rich  | 1         | 1     | Cumulative Cigarettes (15 Years)                  | --              |
| Kidney cancer  | Male   | 0-6 days    | 95+ years | Data Rich  | 1         | 1     | Cumulative Cigarettes (5 Years)                   | --              |
| Kidney cancer  | Male   | 0-6 days    | 95+ years | Data Rich  | -1        | 2     | Healthcare access and quality index               | --              |
| Kidney cancer  | Male   | 0-6 days    | 95+ years | Data Rich  | 1         | 2     | Systolic Blood Pressure (mmHg)                    | 22              |
| Kidney cancer  | Male   | 0-6 days    | 95+ years | Data Rich  | 1         | 2     | Diabetes Age-Standardized Prevalence (proportion) | 97              |
| Kidney cancer  | Male   | 0-6 days    | 95+ years | Data Rich  | 1         | 2     | Alcohol (liters per capita)                       | --              |
| Kidney cancer  | Male   | 0-6 days    | 95+ years | Data Rich  | 1         | 2     | Smoking Prevalence                                | --              |
| Kidney cancer  | Male   | 0-6 days    | 95+ years | Data Rich  | -1        | 3     | Education (years per capita)                      | --              |
| Kidney cancer  | Male   | 0-6 days    | 95+ years | Data Rich  | 0         | 3     | Socio-demographic Index                           | 720             |
| Kidney cancer  | Male   | 0-6 days    | 95+ years | Data Rich  | 0         | 3     | LDI (I\$ per capita)                              | --              |
| Kidney cancer  | Male   | 0-6 days    | 95+ years | Global     | 1         | 1     | Log-transformed SEV scalar: Kidney C              | 513             |
| Kidney cancer  | Male   | 0-6 days    | 95+ years | Global     | 1         | 1     | Mean BMI                                          | 619             |
| Kidney cancer  | Male   | 0-6 days    | 95+ years | Global     | 1         | 1     | Cumulative Cigarettes (10 Years)                  | --              |
| Kidney cancer  | Male   | 0-6 days    | 95+ years | Global     | 1         | 1     | Cumulative Cigarettes (15 Years)                  | --              |
| Kidney cancer  | Male   | 0-6 days    | 95+ years | Global     | 1         | 1     | Cumulative Cigarettes (5 Years)                   | --              |
| Kidney cancer  | Male   | 0-6 days    | 95+ years | Global     | -1        | 2     | Healthcare access and quality index               | --              |
| Kidney cancer  | Male   | 0-6 days    | 95+ years | Global     | 1         | 2     | Diabetes Age-Standardized Prevalence (proportion) | 57              |
| Kidney cancer  | Male   | 0-6 days    | 95+ years | Global     | 1         | 2     | Systolic Blood Pressure (mmHg)                    | 271             |
| Kidney cancer  | Male   | 0-6 days    | 95+ years | Global     | 1         | 2     | Alcohol (liters per capita)                       | --              |
| Kidney cancer  | Male   | 0-6 days    | 95+ years | Global     | 1         | 2     | Smoking Prevalence                                | --              |
| Kidney cancer  | Male   | 0-6 days    | 95+ years | Global     | -1        | 3     | Education (years per capita)                      | --              |
| Kidney cancer  | Male   | 0-6 days    | 95+ years | Global     | 0         | 3     | Socio-demographic Index                           | 481             |
| Kidney cancer  | Male   | 0-6 days    | 95+ years | Global     | 0         | 3     | LDI (I\$ per capita)                              | --              |
| Bladder cancer | Female | 15-19 years | 95+ years | Data Rich  | 1         | 1     | Cumulative Cigarettes (10 Years)                  | 15              |
| Bladder cancer | Female | 15-19 years | 95+ years | Data Rich  | 1         | 1     | Cumulative Cigarettes (5 Years)                   | 47              |
| Bladder cancer | Female | 15-19 years | 95+ years | Data Rich  | 1         | 1     | Log-transformed SEV scalar: Bladder C             | 48              |
| Bladder cancer | Female | 15-19 years | 95+ years | Data Rich  | 1         | 1     | Schistosomiasis Prevalence (proportion)           | 71              |
| Bladder cancer | Female | 15-19 years | 95+ years | Data Rich  | 1         | 1     | Cumulative Cigarettes (15 Years)                  | 87              |
| Bladder cancer | Female | 15-19 years | 95+ years | Data Rich  | 1         | 1     | Smoking Prevalence                                | 189             |
| Bladder cancer | Female | 15-19 years | 95+ years | Data Rich  | -1        | 2     | fruits adjusted(g)                                | 0               |
| Bladder cancer | Female | 15-19 years | 95+ years | Data Rich  | -1        | 2     | Healthcare access and quality index               | 249             |
| Bladder cancer | Female | 15-19 years | 95+ years | Data Rich  | -1        | 2     | vegetables adjusted(g)                            | 249             |
| Bladder cancer | Female | 15-19 years | 95+ years | Data Rich  | 1         | 2     | Diabetes Fasting Plasma Glucose (mmol/L)          | 269             |
| Bladder cancer | Female | 15-19 years | 95+ years | Data Rich  | 1         | 2     | Alcohol (liters per capita)                       | 509             |
| Bladder cancer | Female | 15-19 years | 95+ years | Data Rich  | -1        | 3     | Education (years per capita)                      | 180             |
| Bladder cancer | Female | 15-19 years | 95+ years | Data Rich  | 0         | 3     | LDI (I\$ per capita)                              | 341             |
| Bladder cancer | Female | 15-19 years | 95+ years | Data Rich  | 0         | 3     | Socio-demographic Index                           | 678             |
| Bladder cancer | Female | 15-19 years | 95+ years | Global     | 1         | 1     | Cumulative Cigarettes (10 Years)                  | 72              |
| Bladder cancer | Female | 15-19 years | 95+ years | Global     | 1         | 1     | Cumulative Cigarettes (5 Years)                   | 100             |
| Bladder cancer | Female | 15-19 years | 95+ years | Global     | 1         | 1     | Cumulative Cigarettes (15 Years)                  | 102             |
| Bladder cancer | Female | 15-19 years | 95+ years | Global     | 1         | 1     | Smoking Prevalence                                | 235             |
| Bladder cancer | Female | 15-19 years | 95+ years | Global     | 1         | 1     | Schistosomiasis Prevalence (proportion)           | 251             |
| Bladder cancer | Female | 15-19 years | 95+ years | Global     | 1         | 1     | Log-transformed SEV scalar: Bladder C             | 843             |
| Bladder cancer | Female | 15-19 years | 95+ years | Global     | -1        | 2     | fruits adjusted(g)                                | 31              |
| Bladder cancer | Female | 15-19 years | 95+ years | Global     | -1        | 2     | Healthcare access and quality index               | 387             |
| Bladder cancer | Female | 15-19 years | 95+ years | Global     | -1        | 2     | vegetables adjusted(g)                            | 413             |
| Bladder cancer | Female | 15-19 years | 95+ years | Global     | 1         | 2     | Diabetes Fasting Plasma Glucose (mmol/L)          | 301             |
| Bladder cancer | Female | 15-19 years | 95+ years | Global     | 1         | 2     | Alcohol (liters per capita)                       | 526             |
| Bladder cancer | Female | 15-19 years | 95+ years | Global     | -1        | 3     | Education (years per capita)                      | 63              |
| Bladder cancer | Female | 15-19 years | 95+ years | Global     | 0         | 3     | LDI (I\$ per capita)                              | 533             |
| Bladder cancer | Female | 15-19 years | 95+ years | Global     | 0         | 3     | Socio-demographic Index                           | 761             |
| Bladder cancer | Male   | 15-19 years | 95+ years | Data Rich  | 1         | 1     | Cumulative Cigarettes (5 Years)                   | 8               |
| Bladder cancer | Male   | 15-19 years | 95+ years | Data Rich  | 1         | 1     | Smoking Prevalence                                | 78              |
| Bladder cancer | Male   | 15-19 years | 95+ years | Data Rich  | 1         | 1     | Cumulative Cigarettes (10 Years)                  | 198             |
| Bladder cancer | Male   | 15-19 years | 95+ years | Data Rich  | 1         | 1     | Cumulative Cigarettes (15 Years)                  | 361             |
| Bladder cancer | Male   | 15-19 years | 95+ years | Data Rich  | 1         | 1     | Log-transformed SEV scalar: Bladder C             | 560             |
| Bladder cancer | Male   | 15-19 years | 95+ years | Data Rich  | 1         | 1     | Schistosomiasis Prevalence (proportion)           | 722             |
| Bladder cancer | Male   | 15-19 years | 95+ years | Data Rich  | -1        | 2     | fruits adjusted(g)                                | 0               |
| Bladder cancer | Male   | 15-19 years | 95+ years | Data Rich  | -1        | 2     | Healthcare access and quality index               | 571             |
| Bladder cancer | Male   | 15-19 years | 95+ years | Data Rich  | -1        | 2     | vegetables adjusted(g)                            | 571             |
| Bladder cancer | Male   | 15-19 years | 95+ years | Data Rich  | 1         | 2     | Alcohol (liters per capita)                       | 499             |
| Bladder cancer | Male   | 15-19 years | 95+ years | Data Rich  | 1         | 2     | Diabetes Fasting Plasma Glucose (mmol/L)          | 571             |
| Bladder cancer | Male   | 15-19 years | 95+ years | Data Rich  | -1        | 3     | Education (years per capita)                      | 0               |

**Appendix Table 9: CODEm covariates used, level of covariate, and expected direction of covariate by cause, sex, and age**

*Covariates that CODEm did not select during the covariate selection process have no draw counts listed.*

| Cause                           | Sex    | Age Start   | Age End   | Model Type | Direction | Level | Covariate Name                                 | Number of Draws |
|---------------------------------|--------|-------------|-----------|------------|-----------|-------|------------------------------------------------|-----------------|
| Bladder cancer                  | Male   | 15-19 years | 95+ years | Data Rich  | 0         | 3     | Socio-demographic Index                        | 282             |
| Bladder cancer                  | Male   | 15-19 years | 95+ years | Data Rich  | 0         | 3     | LDI (I\$ per capita)                           | 315             |
| Bladder cancer                  | Male   | 15-19 years | 95+ years | Global     | 1         | 1     | Schistosomiasis Prevalence (proportion)        | 0               |
| Bladder cancer                  | Male   | 15-19 years | 95+ years | Global     | 1         | 1     | Cumulative Cigarettes (15 Years)               | 117             |
| Bladder cancer                  | Male   | 15-19 years | 95+ years | Global     | 1         | 1     | Cumulative Cigarettes (10 Years)               | 175             |
| Bladder cancer                  | Male   | 15-19 years | 95+ years | Global     | 1         | 1     | Cumulative Cigarettes (5 Years)                | 219             |
| Bladder cancer                  | Male   | 15-19 years | 95+ years | Global     | 1         | 1     | Log-transformed SEV scalar: Bladder C          | 427             |
| Bladder cancer                  | Male   | 15-19 years | 95+ years | Global     | 1         | 1     | Smoking Prevalence                             | 639             |
| Bladder cancer                  | Male   | 15-19 years | 95+ years | Global     | -1        | 2     | fruits adjusted(g)                             | 138             |
| Bladder cancer                  | Male   | 15-19 years | 95+ years | Global     | -1        | 2     | vegetables adjusted(g)                         | 546             |
| Bladder cancer                  | Male   | 15-19 years | 95+ years | Global     | -1        | 2     | Healthcare access and quality index            | 658             |
| Bladder cancer                  | Male   | 15-19 years | 95+ years | Global     | 1         | 2     | Alcohol (liters per capita)                    | 923             |
| Bladder cancer                  | Male   | 15-19 years | 95+ years | Global     | 1         | 2     | Diabetes Fasting Plasma Glucose (mmol/L)       | 995             |
| Bladder cancer                  | Male   | 15-19 years | 95+ years | Global     | -1        | 3     | Education (years per capita)                   | 0               |
| Bladder cancer                  | Male   | 15-19 years | 95+ years | Global     | 0         | 3     | LDI (I\$ per capita)                           | 819             |
| Bladder cancer                  | Male   | 15-19 years | 95+ years | Global     | 0         | 3     | Socio-demographic Index                        | 982             |
| Brain and nervous system cancer | Female | 0-6 days    | 95+ years | Data Rich  | 1         | 1     | Alcohol (liters per capita)                    | 1000            |
| Brain and nervous system cancer | Female | 0-6 days    | 95+ years | Data Rich  | 1         | 1     | Cumulative Cigarettes (10 Years)               | --              |
| Brain and nervous system cancer | Female | 0-6 days    | 95+ years | Data Rich  | 1         | 1     | Cumulative Cigarettes (15 Years)               | --              |
| Brain and nervous system cancer | Female | 0-6 days    | 95+ years | Data Rich  | 1         | 1     | Smoking Prevalence                             | --              |
| Brain and nervous system cancer | Female | 0-6 days    | 95+ years | Data Rich  | -1        | 2     | Healthcare access and quality index            | --              |
| Brain and nervous system cancer | Female | 0-6 days    | 95+ years | Data Rich  | -1        | 2     | fruits adjusted(g)                             | --              |
| Brain and nervous system cancer | Female | 0-6 days    | 95+ years | Data Rich  | -1        | 2     | vegetables adjusted(g)                         | --              |
| Brain and nervous system cancer | Female | 0-6 days    | 95+ years | Data Rich  | 1         | 2     | Cholesterol (total, mean per capita)           | 471             |
| Brain and nervous system cancer | Female | 0-6 days    | 95+ years | Data Rich  | 1         | 2     | red meats adjusted(g)                          | 471             |
| Brain and nervous system cancer | Female | 0-6 days    | 95+ years | Data Rich  | 1         | 2     | Systolic Blood Pressure (mmHg)                 | --              |
| Brain and nervous system cancer | Female | 0-6 days    | 95+ years | Data Rich  | -1        | 3     | Education (years per capita)                   | --              |
| Brain and nervous system cancer | Female | 0-6 days    | 95+ years | Data Rich  | 0         | 3     | LDI (I\$ per capita)                           | 624             |
| Brain and nervous system cancer | Female | 0-6 days    | 95+ years | Data Rich  | 0         | 3     | Socio-demographic Index                        | --              |
| Brain and nervous system cancer | Female | 0-6 days    | 95+ years | Global     | 1         | 1     | Alcohol (liters per capita)                    | 602             |
| Brain and nervous system cancer | Female | 0-6 days    | 95+ years | Global     | 1         | 1     | Cumulative Cigarettes (10 Years)               | --              |
| Brain and nervous system cancer | Female | 0-6 days    | 95+ years | Global     | 1         | 1     | Cumulative Cigarettes (15 Years)               | --              |
| Brain and nervous system cancer | Female | 0-6 days    | 95+ years | Global     | 1         | 1     | Smoking Prevalence                             | --              |
| Brain and nervous system cancer | Female | 0-6 days    | 95+ years | Global     | -1        | 2     | Healthcare access and quality index            | --              |
| Brain and nervous system cancer | Female | 0-6 days    | 95+ years | Global     | -1        | 2     | fruits adjusted(g)                             | --              |
| Brain and nervous system cancer | Female | 0-6 days    | 95+ years | Global     | -1        | 2     | vegetables adjusted(g)                         | --              |
| Brain and nervous system cancer | Female | 0-6 days    | 95+ years | Global     | 1         | 2     | red meats adjusted(g)                          | 328             |
| Brain and nervous system cancer | Female | 0-6 days    | 95+ years | Global     | 1         | 2     | Cholesterol (total, mean per capita)           | --              |
| Brain and nervous system cancer | Female | 0-6 days    | 95+ years | Global     | 1         | 2     | Systolic Blood Pressure (mmHg)                 | --              |
| Brain and nervous system cancer | Female | 0-6 days    | 95+ years | Global     | -1        | 3     | Education (years per capita)                   | --              |
| Brain and nervous system cancer | Female | 0-6 days    | 95+ years | Global     | 0         | 3     | LDI (I\$ per capita)                           | 398             |
| Brain and nervous system cancer | Female | 0-6 days    | 95+ years | Global     | 0         | 3     | Socio-demographic Index                        | 398             |
| Brain and nervous system cancer | Male   | 0-6 days    | 95+ years | Data Rich  | 1         | 1     | Alcohol (liters per capita)                    | --              |
| Brain and nervous system cancer | Male   | 0-6 days    | 95+ years | Data Rich  | 1         | 1     | Cumulative Cigarettes (10 Years)               | --              |
| Brain and nervous system cancer | Male   | 0-6 days    | 95+ years | Data Rich  | 1         | 1     | Cumulative Cigarettes (15 Years)               | --              |
| Brain and nervous system cancer | Male   | 0-6 days    | 95+ years | Data Rich  | 1         | 1     | Smoking Prevalence                             | --              |
| Brain and nervous system cancer | Male   | 0-6 days    | 95+ years | Data Rich  | -1        | 2     | Healthcare access and quality index            | --              |
| Brain and nervous system cancer | Male   | 0-6 days    | 95+ years | Data Rich  | -1        | 2     | fruits adjusted(g)                             | --              |
| Brain and nervous system cancer | Male   | 0-6 days    | 95+ years | Data Rich  | -1        | 2     | vegetables adjusted(g)                         | --              |
| Brain and nervous system cancer | Male   | 0-6 days    | 95+ years | Data Rich  | 1         | 2     | Cholesterol (total, mean per capita)           | 326             |
| Brain and nervous system cancer | Male   | 0-6 days    | 95+ years | Data Rich  | 1         | 2     | red meats adjusted(g)                          | 434             |
| Brain and nervous system cancer | Male   | 0-6 days    | 95+ years | Data Rich  | 1         | 2     | Systolic Blood Pressure (mmHg)                 | --              |
| Brain and nervous system cancer | Male   | 0-6 days    | 95+ years | Data Rich  | -1        | 3     | Education (years per capita)                   | --              |
| Brain and nervous system cancer | Male   | 0-6 days    | 95+ years | Data Rich  | 0         | 3     | Socio-demographic Index                        | 566             |
| Brain and nervous system cancer | Male   | 0-6 days    | 95+ years | Data Rich  | 0         | 3     | LDI (I\$ per capita)                           | 742             |
| Brain and nervous system cancer | Male   | 0-6 days    | 95+ years | Global     | 1         | 1     | Alcohol (liters per capita)                    | 454             |
| Brain and nervous system cancer | Male   | 0-6 days    | 95+ years | Global     | 1         | 1     | Cumulative Cigarettes (10 Years)               | --              |
| Brain and nervous system cancer | Male   | 0-6 days    | 95+ years | Global     | 1         | 1     | Cumulative Cigarettes (15 Years)               | --              |
| Brain and nervous system cancer | Male   | 0-6 days    | 95+ years | Global     | 1         | 1     | Smoking Prevalence                             | --              |
| Brain and nervous system cancer | Male   | 0-6 days    | 95+ years | Global     | -1        | 2     | Healthcare access and quality index            | --              |
| Brain and nervous system cancer | Male   | 0-6 days    | 95+ years | Global     | -1        | 2     | fruits adjusted(g)                             | --              |
| Brain and nervous system cancer | Male   | 0-6 days    | 95+ years | Global     | -1        | 2     | vegetables adjusted(g)                         | --              |
| Brain and nervous system cancer | Male   | 0-6 days    | 95+ years | Global     | 1         | 2     | red meats adjusted(g)                          | 546             |
| Brain and nervous system cancer | Male   | 0-6 days    | 95+ years | Global     | 1         | 2     | Cholesterol (total, mean per capita)           | --              |
| Brain and nervous system cancer | Male   | 0-6 days    | 95+ years | Global     | 1         | 2     | Systolic Blood Pressure (mmHg)                 | --              |
| Brain and nervous system cancer | Male   | 0-6 days    | 95+ years | Global     | -1        | 3     | Education (years per capita)                   | --              |
| Brain and nervous system cancer | Male   | 0-6 days    | 95+ years | Global     | 0         | 3     | Socio-demographic Index                        | 546             |
| Brain and nervous system cancer | Male   | 0-6 days    | 95+ years | Global     | 0         | 3     | LDI (I\$ per capita)                           | --              |
| Thyroid cancer                  | Female | 10-14 years | 95+ years | Data Rich  | 1         | 1     | Alcohol (liters per capita)                    | 665             |
| Thyroid cancer                  | Female | 10-14 years | 95+ years | Data Rich  | 1         | 1     | Log-transformed SEV scalar: Thyroid C          | 753             |
| Thyroid cancer                  | Female | 10-14 years | 95+ years | Data Rich  | -1        | 2     | Sanitation (proportion with access)            | 5               |
| Thyroid cancer                  | Female | 10-14 years | 95+ years | Data Rich  | -1        | 2     | Healthcare access and quality index            | 55              |
| Thyroid cancer                  | Female | 10-14 years | 95+ years | Data Rich  | -1        | 2     | Improved Water Source (proportion with access) | 55              |
| Thyroid cancer                  | Female | 10-14 years | 95+ years | Data Rich  | -1        | 2     | fruits adjusted(g)                             | 55              |
| Thyroid cancer                  | Female | 10-14 years | 95+ years | Data Rich  | -1        | 2     | vegetables adjusted(g)                         | --              |
| Thyroid cancer                  | Female | 10-14 years | 95+ years | Data Rich  | 1         | 2     | Smoking Prevalence                             | 27              |
| Thyroid cancer                  | Female | 10-14 years | 95+ years | Data Rich  | 1         | 2     | Tobacco (cigarettes per capita)                | 33              |
| Thyroid cancer                  | Female | 10-14 years | 95+ years | Data Rich  | 1         | 2     | red meats adjusted(g)                          | 68              |

**Appendix Table 9: CODEm covariates used, level of covariate, and expected direction of covariate by cause, sex, and age**

*Covariates that CODEm did not select during the covariate selection process have no draw counts listed.*

| Cause          | Sex    | Age Start   | Age End   | Model Type | Direction | Level | Covariate Name                                         | Number of Draws |
|----------------|--------|-------------|-----------|------------|-----------|-------|--------------------------------------------------------|-----------------|
| Thyroid cancer | Female | 10-14 years | 95+ years | Data Rich  | 1         | 2     | Mean BMI                                               | 192             |
| Thyroid cancer | Female | 10-14 years | 95+ years | Data Rich  | -1        | 3     | Education (years per capita)                           | 31              |
| Thyroid cancer | Female | 10-14 years | 95+ years | Data Rich  | 0         | 3     | Socio-demographic Index                                | 279             |
| Thyroid cancer | Female | 10-14 years | 95+ years | Data Rich  | 0         | 3     | LDI (IS per capita)                                    | --              |
| Thyroid cancer | Female | 10-14 years | 95+ years | Global     | 1         | 1     | Log-transformed SEV scalar: Thyroid C                  | 400             |
| Thyroid cancer | Female | 10-14 years | 95+ years | Global     | 1         | 1     | Alcohol (liters per capita)                            | 796             |
| Thyroid cancer | Female | 10-14 years | 95+ years | Global     | -1        | 2     | Sanitation (proportion with access)                    | 72              |
| Thyroid cancer | Female | 10-14 years | 95+ years | Global     | -1        | 2     | Healthcare access and quality index                    | 134             |
| Thyroid cancer | Female | 10-14 years | 95+ years | Global     | -1        | 2     | Improved Water Source (proportion with access)         | 134             |
| Thyroid cancer | Female | 10-14 years | 95+ years | Global     | -1        | 2     | vegetables adjusted(g)                                 | 167             |
| Thyroid cancer | Female | 10-14 years | 95+ years | Global     | -1        | 2     | fruits adjusted(g)                                     | 173             |
| Thyroid cancer | Female | 10-14 years | 95+ years | Global     | 1         | 2     | Tobacco (cigarettes per capita)                        | 70              |
| Thyroid cancer | Female | 10-14 years | 95+ years | Global     | 1         | 2     | Smoking Prevalence                                     | 136             |
| Thyroid cancer | Female | 10-14 years | 95+ years | Global     | 1         | 2     | Mean BMI                                               | 234             |
| Thyroid cancer | Female | 10-14 years | 95+ years | Global     | 1         | 2     | red meats adjusted(g)                                  | 234             |
| Thyroid cancer | Female | 10-14 years | 95+ years | Global     | -1        | 3     | Education (years per capita)                           | 64              |
| Thyroid cancer | Female | 10-14 years | 95+ years | Global     | 0         | 3     | Socio-demographic Index                                | 125             |
| Thyroid cancer | Female | 10-14 years | 95+ years | Global     | 0         | 3     | LDI (IS per capita)                                    | --              |
| Thyroid cancer | Male   | 10-14 years | 95+ years | Data Rich  | 1         | 1     | Alcohol (liters per capita)                            | 369             |
| Thyroid cancer | Male   | 10-14 years | 95+ years | Data Rich  | 1         | 1     | Log-transformed SEV scalar: Thyroid C                  | 770             |
| Thyroid cancer | Male   | 10-14 years | 95+ years | Data Rich  | -1        | 2     | Sanitation (proportion with access)                    | 19              |
| Thyroid cancer | Male   | 10-14 years | 95+ years | Data Rich  | -1        | 2     | Improved Water Source (proportion with access)         | 43              |
| Thyroid cancer | Male   | 10-14 years | 95+ years | Data Rich  | -1        | 2     | Healthcare access and quality index                    | 97              |
| Thyroid cancer | Male   | 10-14 years | 95+ years | Data Rich  | -1        | 2     | fruits adjusted(g)                                     | 384             |
| Thyroid cancer | Male   | 10-14 years | 95+ years | Data Rich  | -1        | 2     | vegetables adjusted(g)                                 | 421             |
| Thyroid cancer | Male   | 10-14 years | 95+ years | Data Rich  | 1         | 2     | Tobacco (cigarettes per capita)                        | 25              |
| Thyroid cancer | Male   | 10-14 years | 95+ years | Data Rich  | 1         | 2     | Smoking Prevalence                                     | 43              |
| Thyroid cancer | Male   | 10-14 years | 95+ years | Data Rich  | 1         | 2     | Mean BMI                                               | 663             |
| Thyroid cancer | Male   | 10-14 years | 95+ years | Data Rich  | 1         | 2     | red meats adjusted(g)                                  | --              |
| Thyroid cancer | Male   | 10-14 years | 95+ years | Data Rich  | -1        | 3     | Education (years per capita)                           | 25              |
| Thyroid cancer | Male   | 10-14 years | 95+ years | Data Rich  | 0         | 3     | Socio-demographic Index                                | 149             |
| Thyroid cancer | Male   | 10-14 years | 95+ years | Data Rich  | 0         | 3     | LDI (IS per capita)                                    | --              |
| Thyroid cancer | Male   | 10-14 years | 95+ years | Global     | 1         | 1     | Alcohol (liters per capita)                            | 483             |
| Thyroid cancer | Male   | 10-14 years | 95+ years | Global     | 1         | 1     | Log-transformed SEV scalar: Thyroid C                  | 614             |
| Thyroid cancer | Male   | 10-14 years | 95+ years | Global     | 2         | 1     | Smoking Prevalence                                     | --              |
| Thyroid cancer | Male   | 10-14 years | 95+ years | Global     | -1        | 2     | Improved Water Source (proportion with access)         | 17              |
| Thyroid cancer | Male   | 10-14 years | 95+ years | Global     | -1        | 2     | Sanitation (proportion with access)                    | 19              |
| Thyroid cancer | Male   | 10-14 years | 95+ years | Global     | -1        | 2     | vegetables adjusted(g)                                 | 53              |
| Thyroid cancer | Male   | 10-14 years | 95+ years | Global     | -1        | 2     | Healthcare access and quality index                    | 226             |
| Thyroid cancer | Male   | 10-14 years | 95+ years | Global     | -1        | 2     | fruits adjusted(g)                                     | 232             |
| Thyroid cancer | Male   | 10-14 years | 95+ years | Global     | 1         | 2     | Tobacco (cigarettes per capita)                        | 68              |
| Thyroid cancer | Male   | 10-14 years | 95+ years | Global     | 1         | 2     | red meats adjusted(g)                                  | 116             |
| Thyroid cancer | Male   | 10-14 years | 95+ years | Global     | 1         | 2     | Mean BMI                                               | --              |
| Thyroid cancer | Male   | 10-14 years | 95+ years | Global     | -1        | 3     | Education (years per capita)                           | 125             |
| Thyroid cancer | Male   | 10-14 years | 95+ years | Global     | 0         | 3     | Socio-demographic Index                                | 297             |
| Thyroid cancer | Male   | 10-14 years | 95+ years | Global     | 0         | 3     | LDI (IS per capita)                                    | --              |
| Mesothelioma   | Female | 15-19 years | 95+ years | Data Rich  | 1         | 1     | Asbestos consumption (metric tons per year per capita) | 0               |
| Mesothelioma   | Female | 15-19 years | 95+ years | Data Rich  | 1         | 1     | Cumulative Cigarettes (5 Years)                        | 39              |
| Mesothelioma   | Female | 15-19 years | 95+ years | Data Rich  | 1         | 1     | Smoking Prevalence                                     | 130             |
| Mesothelioma   | Female | 15-19 years | 95+ years | Data Rich  | 1         | 1     | Log-transformed age-standardized SEV scalar: Mesothel  | 151             |
| Mesothelioma   | Female | 15-19 years | 95+ years | Data Rich  | 1         | 1     | Log-transformed SEV scalar: Mesothel                   | 878             |
| Mesothelioma   | Female | 15-19 years | 95+ years | Data Rich  | 1         | 1     | Asbestos production (binary)                           | --              |
| Mesothelioma   | Female | 15-19 years | 95+ years | Data Rich  | 1         | 1     | Indoor Air Pollution (All Cooking Fuels)               | --              |
| Mesothelioma   | Female | 15-19 years | 95+ years | Data Rich  | -1        | 2     | Healthcare access and quality index                    | --              |
| Mesothelioma   | Female | 15-19 years | 95+ years | Data Rich  | 1         | 2     | Gold production (kg) per capita                        | 0               |
| Mesothelioma   | Female | 15-19 years | 95+ years | Data Rich  | 1         | 2     | Gold production (binary)                               | 498             |
| Mesothelioma   | Female | 15-19 years | 95+ years | Data Rich  | 1         | 2     | Population Density (over 1000 ppl/sqkm, proportion)    | 498             |
| Mesothelioma   | Female | 15-19 years | 95+ years | Data Rich  | 1         | 2     | Asbestos production (kg) per capita                    | --              |
| Mesothelioma   | Female | 15-19 years | 95+ years | Data Rich  | -1        | 3     | Education (years per capita)                           | --              |
| Mesothelioma   | Female | 15-19 years | 95+ years | Data Rich  | 0         | 3     | Socio-demographic Index                                | 648             |
| Mesothelioma   | Female | 15-19 years | 95+ years | Data Rich  | 0         | 3     | LDI (IS per capita)                                    | --              |
| Mesothelioma   | Female | 15-19 years | 95+ years | Global     | 1         | 1     | Asbestos consumption (metric tons per year per capita) | 5               |
| Mesothelioma   | Female | 15-19 years | 95+ years | Global     | 1         | 1     | Smoking Prevalence                                     | 86              |
| Mesothelioma   | Female | 15-19 years | 95+ years | Global     | 1         | 1     | Cumulative Cigarettes (5 Years)                        | 211             |
| Mesothelioma   | Female | 15-19 years | 95+ years | Global     | 1         | 1     | Log-transformed age-standardized SEV scalar: Mesothel  | 652             |
| Mesothelioma   | Female | 15-19 years | 95+ years | Global     | 1         | 1     | Log-transformed SEV scalar: Mesothel                   | 798             |
| Mesothelioma   | Female | 15-19 years | 95+ years | Global     | 1         | 1     | Asbestos production (binary)                           | --              |
| Mesothelioma   | Female | 15-19 years | 95+ years | Global     | 1         | 1     | Indoor Air Pollution (All Cooking Fuels)               | --              |
| Mesothelioma   | Female | 15-19 years | 95+ years | Global     | -1        | 2     | Healthcare access and quality index                    | --              |
| Mesothelioma   | Female | 15-19 years | 95+ years | Global     | 1         | 2     | Gold production (binary)                               | 113             |
| Mesothelioma   | Female | 15-19 years | 95+ years | Global     | 1         | 2     | Gold production (kg) per capita                        | 131             |
| Mesothelioma   | Female | 15-19 years | 95+ years | Global     | 1         | 2     | Population Density (over 1000 ppl/sqkm, proportion)    | 463             |
| Mesothelioma   | Female | 15-19 years | 95+ years | Global     | 1         | 2     | Asbestos production (kg) per capita                    | --              |
| Mesothelioma   | Female | 15-19 years | 95+ years | Global     | -1        | 3     | Education (years per capita)                           | --              |
| Mesothelioma   | Female | 15-19 years | 95+ years | Global     | 0         | 3     | Socio-demographic Index                                | 332             |
| Mesothelioma   | Female | 15-19 years | 95+ years | Global     | 0         | 3     | LDI (IS per capita)                                    | --              |
| Mesothelioma   | Male   | 15-19 years | 95+ years | Data Rich  | 1         | 1     | Asbestos consumption (metric tons per year per capita) | 0               |
| Mesothelioma   | Male   | 15-19 years | 95+ years | Data Rich  | 1         | 1     | Smoking Prevalence                                     | 0               |

**Appendix Table 9: CODEm covariates used, level of covariate, and expected direction of covariate by cause, sex, and age**

*Covariates that CODEm did not select during the covariate selection process have no draw counts listed.*

| Cause                  | Sex    | Age Start   | Age End   | Model Type | Direction | Level | Covariate Name                                         | Number of Draws |
|------------------------|--------|-------------|-----------|------------|-----------|-------|--------------------------------------------------------|-----------------|
| Mesothelioma           | Male   | 15-19 years | 95+ years | Data Rich  | 1         | 1     | Cumulative Cigarettes (5 Years)                        | 375             |
| Mesothelioma           | Male   | 15-19 years | 95+ years | Data Rich  | 1         | 1     | Log-transformed SEV scalar: Mesothel                   | 882             |
| Mesothelioma           | Male   | 15-19 years | 95+ years | Data Rich  | 1         | 1     | Log-transformed age-standardized SEV scalar: Mesothel  | 977             |
| Mesothelioma           | Male   | 15-19 years | 95+ years | Data Rich  | 1         | 1     | Asbestos production (binary)                           | --              |
| Mesothelioma           | Male   | 15-19 years | 95+ years | Data Rich  | 1         | 1     | Indoor Air Pollution (All Cooking Fuels)               | --              |
| Mesothelioma           | Male   | 15-19 years | 95+ years | Data Rich  | -1        | 2     | Healthcare access and quality index                    | --              |
| Mesothelioma           | Male   | 15-19 years | 95+ years | Data Rich  | 1         | 2     | Population Density (over 1000 ppl/sqkm, proportion)    | 6               |
| Mesothelioma           | Male   | 15-19 years | 95+ years | Data Rich  | 1         | 2     | Gold production (binary)                               | 246             |
| Mesothelioma           | Male   | 15-19 years | 95+ years | Data Rich  | 1         | 2     | Asbestos production (kg) per capita                    | --              |
| Mesothelioma           | Male   | 15-19 years | 95+ years | Data Rich  | 1         | 2     | Gold production (kg) per capita                        | --              |
| Mesothelioma           | Male   | 15-19 years | 95+ years | Data Rich  | -1        | 3     | Education (years per capita)                           | --              |
| Mesothelioma           | Male   | 15-19 years | 95+ years | Data Rich  | 0         | 3     | Socio-demographic Index                                | 694             |
| Mesothelioma           | Male   | 15-19 years | 95+ years | Data Rich  | 0         | 3     | LDI (I\$ per capita)                                   | --              |
| Mesothelioma           | Male   | 15-19 years | 95+ years | Global     | 1         | 1     | Asbestos consumption (metric tons per year per capita) | 0               |
| Mesothelioma           | Male   | 15-19 years | 95+ years | Global     | 1         | 1     | Smoking Prevalence                                     | 11              |
| Mesothelioma           | Male   | 15-19 years | 95+ years | Global     | 1         | 1     | Indoor Air Pollution (All Cooking Fuels)               | 167             |
| Mesothelioma           | Male   | 15-19 years | 95+ years | Global     | 1         | 1     | Cumulative Cigarettes (5 Years)                        | 443             |
| Mesothelioma           | Male   | 15-19 years | 95+ years | Global     | 1         | 1     | Log-transformed SEV scalar: Mesothel                   | 732             |
| Mesothelioma           | Male   | 15-19 years | 95+ years | Global     | 1         | 1     | Log-transformed age-standardized SEV scalar: Mesothel  | 968             |
| Mesothelioma           | Male   | 15-19 years | 95+ years | Global     | 1         | 1     | Asbestos production (binary)                           | --              |
| Mesothelioma           | Male   | 15-19 years | 95+ years | Global     | -1        | 2     | Healthcare access and quality index                    | --              |
| Mesothelioma           | Male   | 15-19 years | 95+ years | Global     | 1         | 2     | Gold production (binary)                               | 0               |
| Mesothelioma           | Male   | 15-19 years | 95+ years | Global     | 1         | 2     | Gold production (kg) per capita                        | 0               |
| Mesothelioma           | Male   | 15-19 years | 95+ years | Global     | 1         | 2     | Population Density (over 1000 ppl/sqkm, proportion)    | 84              |
| Mesothelioma           | Male   | 15-19 years | 95+ years | Global     | 1         | 2     | Asbestos production (kg) per capita                    | --              |
| Mesothelioma           | Male   | 15-19 years | 95+ years | Global     | -1        | 3     | Education (years per capita)                           | --              |
| Mesothelioma           | Male   | 15-19 years | 95+ years | Global     | 0         | 3     | Socio-demographic Index                                | 630             |
| Mesothelioma           | Male   | 15-19 years | 95+ years | Global     | 0         | 3     | LDI (I\$ per capita)                                   | --              |
| Hodgkin lymphoma       | Female | 0-6 days    | 95+ years | Data Rich  | -1        | 2     | Healthcare access and quality index                    | 1000            |
| Hodgkin lymphoma       | Female | 0-6 days    | 95+ years | Data Rich  | -1        | 3     | Education (years per capita)                           | 308             |
| Hodgkin lymphoma       | Female | 0-6 days    | 95+ years | Data Rich  | 0         | 3     | Socio-demographic Index                                | 308             |
| Hodgkin lymphoma       | Female | 0-6 days    | 95+ years | Data Rich  | 0         | 3     | LDI (I\$ per capita)                                   | --              |
| Hodgkin lymphoma       | Female | 0-6 days    | 95+ years | Global     | -1        | 2     | Healthcare access and quality index                    | 1000            |
| Hodgkin lymphoma       | Female | 0-6 days    | 95+ years | Global     | -1        | 3     | Education (years per capita)                           | 328             |
| Hodgkin lymphoma       | Female | 0-6 days    | 95+ years | Global     | 0         | 3     | Socio-demographic Index                                | 328             |
| Hodgkin lymphoma       | Female | 0-6 days    | 95+ years | Global     | 0         | 3     | LDI (I\$ per capita)                                   | --              |
| Hodgkin lymphoma       | Male   | 0-6 days    | 95+ years | Data Rich  | -1        | 2     | Healthcare access and quality index                    | --              |
| Hodgkin lymphoma       | Male   | 0-6 days    | 95+ years | Data Rich  | -1        | 3     | Education (years per capita)                           | 381             |
| Hodgkin lymphoma       | Male   | 0-6 days    | 95+ years | Data Rich  | 0         | 3     | Socio-demographic Index                                | 1000            |
| Hodgkin lymphoma       | Male   | 0-6 days    | 95+ years | Data Rich  | 0         | 3     | LDI (I\$ per capita)                                   | --              |
| Hodgkin lymphoma       | Male   | 0-6 days    | 95+ years | Global     | -1        | 2     | Healthcare access and quality index                    | 1000            |
| Hodgkin lymphoma       | Male   | 0-6 days    | 95+ years | Global     | -1        | 3     | Education (years per capita)                           | --              |
| Hodgkin lymphoma       | Male   | 0-6 days    | 95+ years | Global     | 0         | 3     | Socio-demographic Index                                | 452             |
| Hodgkin lymphoma       | Male   | 0-6 days    | 95+ years | Global     | 0         | 3     | LDI (I\$ per capita)                                   | --              |
| Non-Hodgkin's lymphoma | Female | 0-6 days    | 95+ years | Data Rich  | -1        | 2     | Healthcare access and quality index                    | 128             |
| Non-Hodgkin's lymphoma | Female | 0-6 days    | 95+ years | Data Rich  | 1         | 2     | Cumulative Cigarettes (15 Years)                       | 3               |
| Non-Hodgkin's lymphoma | Female | 0-6 days    | 95+ years | Data Rich  | 1         | 2     | Cumulative Cigarettes (10 Years)                       | 22              |
| Non-Hodgkin's lymphoma | Female | 0-6 days    | 95+ years | Data Rich  | 1         | 2     | Smoking Prevalence                                     | 24              |
| Non-Hodgkin's lymphoma | Female | 0-6 days    | 95+ years | Data Rich  | 1         | 2     | Cumulative Cigarettes (5 Years)                        | 44              |
| Non-Hodgkin's lymphoma | Female | 0-6 days    | 95+ years | Data Rich  | 1         | 2     | Cumulative Cigarettes (20 Years)                       | 117             |
| Non-Hodgkin's lymphoma | Female | 0-6 days    | 95+ years | Data Rich  | 1         | 2     | Mean BMI                                               | 407             |
| Non-Hodgkin's lymphoma | Female | 0-6 days    | 95+ years | Data Rich  | 1         | 2     | Alcohol (liters per capita)                            | 902             |
| Non-Hodgkin's lymphoma | Female | 0-6 days    | 95+ years | Data Rich  | 0         | 3     | Total Fertility Rate                                   | 107             |
| Non-Hodgkin's lymphoma | Female | 0-6 days    | 95+ years | Data Rich  | 0         | 3     | Socio-demographic Index                                | 366             |
| Non-Hodgkin's lymphoma | Female | 0-6 days    | 95+ years | Data Rich  | 0         | 3     | LDI (I\$ per capita)                                   | --              |
| Non-Hodgkin's lymphoma | Female | 0-6 days    | 95+ years | Global     | -1        | 2     | Healthcare access and quality index                    | 247             |
| Non-Hodgkin's lymphoma | Female | 0-6 days    | 95+ years | Global     | 1         | 2     | Cumulative Cigarettes (5 Years)                        | 38              |
| Non-Hodgkin's lymphoma | Female | 0-6 days    | 95+ years | Global     | 1         | 2     | Cumulative Cigarettes (10 Years)                       | 86              |
| Non-Hodgkin's lymphoma | Female | 0-6 days    | 95+ years | Global     | 1         | 2     | Smoking Prevalence                                     | 103             |
| Non-Hodgkin's lymphoma | Female | 0-6 days    | 95+ years | Global     | 1         | 2     | Cumulative Cigarettes (20 Years)                       | 161             |
| Non-Hodgkin's lymphoma | Female | 0-6 days    | 95+ years | Global     | 1         | 2     | Cumulative Cigarettes (15 Years)                       | 283             |
| Non-Hodgkin's lymphoma | Female | 0-6 days    | 95+ years | Global     | 1         | 2     | Mean BMI                                               | 532             |
| Non-Hodgkin's lymphoma | Female | 0-6 days    | 95+ years | Global     | 1         | 2     | Alcohol (liters per capita)                            | 749             |
| Non-Hodgkin's lymphoma | Female | 0-6 days    | 95+ years | Global     | 0         | 3     | Socio-demographic Index                                | 361             |
| Non-Hodgkin's lymphoma | Female | 0-6 days    | 95+ years | Global     | 0         | 3     | Total Fertility Rate                                   | 458             |
| Non-Hodgkin's lymphoma | Female | 0-6 days    | 95+ years | Global     | 0         | 3     | LDI (I\$ per capita)                                   | --              |
| Non-Hodgkin's lymphoma | Male   | 0-6 days    | 95+ years | Data Rich  | -1        | 2     | Healthcare access and quality index                    | 233             |
| Non-Hodgkin's lymphoma | Male   | 0-6 days    | 95+ years | Data Rich  | 1         | 2     | Cumulative Cigarettes (10 Years)                       | 13              |
| Non-Hodgkin's lymphoma | Male   | 0-6 days    | 95+ years | Data Rich  | 1         | 2     | Cumulative Cigarettes (20 Years)                       | 17              |
| Non-Hodgkin's lymphoma | Male   | 0-6 days    | 95+ years | Data Rich  | 1         | 2     | Cumulative Cigarettes (15 Years)                       | 23              |
| Non-Hodgkin's lymphoma | Male   | 0-6 days    | 95+ years | Data Rich  | 1         | 2     | Cumulative Cigarettes (5 Years)                        | 169             |
| Non-Hodgkin's lymphoma | Male   | 0-6 days    | 95+ years | Data Rich  | 1         | 2     | Mean BMI                                               | 249             |
| Non-Hodgkin's lymphoma | Male   | 0-6 days    | 95+ years | Data Rich  | 1         | 2     | Alcohol (liters per capita)                            | 568             |
| Non-Hodgkin's lymphoma | Male   | 0-6 days    | 95+ years | Data Rich  | 1         | 2     | Smoking Prevalence                                     | --              |
| Non-Hodgkin's lymphoma | Male   | 0-6 days    | 95+ years | Data Rich  | 0         | 3     | Socio-demographic Index                                | 344             |
| Non-Hodgkin's lymphoma | Male   | 0-6 days    | 95+ years | Data Rich  | 0         | 3     | LDI (I\$ per capita)                                   | --              |
| Non-Hodgkin's lymphoma | Male   | 0-6 days    | 95+ years | Global     | -1        | 2     | Healthcare access and quality index                    | 364             |
| Non-Hodgkin's lymphoma | Male   | 0-6 days    | 95+ years | Global     | 1         | 2     | Cumulative Cigarettes (10 Years)                       | 50              |



**Appendix Table 9: CODEm covariates used, level of covariate, and expected direction of covariate by cause, sex, and age**

*Covariates that CODEm did not select during the covariate selection process have no draw counts listed.*

| Cause                  | Sex    | Age Start   | Age End   | Model Type | Direction | Level | Covariate Name                                        | Number of Draws |
|------------------------|--------|-------------|-----------|------------|-----------|-------|-------------------------------------------------------|-----------------|
| Non-Hodgkin's lymphoma | Male   | 0-6 days    | 95+ years | Global     | 1         | 2     | Cumulative Cigarettes (5 Years)                       | 60              |
| Non-Hodgkin's lymphoma | Male   | 0-6 days    | 95+ years | Global     | 1         | 2     | Cumulative Cigarettes (20 Years)                      | 73              |
| Non-Hodgkin's lymphoma | Male   | 0-6 days    | 95+ years | Global     | 1         | 2     | Cumulative Cigarettes (15 Years)                      | 183             |
| Non-Hodgkin's lymphoma | Male   | 0-6 days    | 95+ years | Global     | 1         | 2     | Mean BMI                                              | 324             |
| Non-Hodgkin's lymphoma | Male   | 0-6 days    | 95+ years | Global     | 1         | 2     | Alcohol (liters per capita)                           | 349             |
| Non-Hodgkin's lymphoma | Male   | 0-6 days    | 95+ years | Global     | 1         | 2     | Smoking Prevalence                                    | --              |
| Non-Hodgkin's lymphoma | Male   | 0-6 days    | 95+ years | Global     | 0         | 3     | Socio-demographic Index                               | 622             |
| Non-Hodgkin's lymphoma | Male   | 0-6 days    | 95+ years | Global     | 0         | 3     | LDI (IS per capita)                                   | --              |
| Multiple myeloma       | Female | 15-19 years | 95+ years | Data Rich  | 1         | 1     | Smoking Prevalence                                    | 287             |
| Multiple myeloma       | Female | 15-19 years | 95+ years | Data Rich  | 1         | 1     | Alcohol (liters per capita)                           | 713             |
| Multiple myeloma       | Female | 15-19 years | 95+ years | Data Rich  | 1         | 1     | Tobacco (cigarettes per capita)                       | --              |
| Multiple myeloma       | Female | 15-19 years | 95+ years | Data Rich  | -1        | 2     | Healthcare access and quality index                   | --              |
| Multiple myeloma       | Female | 15-19 years | 95+ years | Data Rich  | -1        | 2     | Improved Water Source (proportion with access)        | --              |
| Multiple myeloma       | Female | 15-19 years | 95+ years | Data Rich  | -1        | 2     | Sanitation (proportion with access)                   | --              |
| Multiple myeloma       | Female | 15-19 years | 95+ years | Data Rich  | -1        | 2     | fruits adjusted(g)                                    | --              |
| Multiple myeloma       | Female | 15-19 years | 95+ years | Data Rich  | -1        | 2     | vegetables adjusted(g)                                | --              |
| Multiple myeloma       | Female | 15-19 years | 95+ years | Data Rich  | 1         | 2     | red meats adjusted(g)                                 | 191             |
| Multiple myeloma       | Female | 15-19 years | 95+ years | Data Rich  | 1         | 2     | Mean BMI                                              | 379             |
| Multiple myeloma       | Female | 15-19 years | 95+ years | Data Rich  | -1        | 3     | Education (years per capita)                          | --              |
| Multiple myeloma       | Female | 15-19 years | 95+ years | Data Rich  | 0         | 3     | Socio-demographic Index                               | 370             |
| Multiple myeloma       | Female | 15-19 years | 95+ years | Data Rich  | 0         | 3     | LDI (IS per capita)                                   | --              |
| Multiple myeloma       | Female | 15-19 years | 95+ years | Global     | 1         | 1     | Smoking Prevalence                                    | 643             |
| Multiple myeloma       | Female | 15-19 years | 95+ years | Global     | 1         | 1     | Alcohol (liters per capita)                           | 796             |
| Multiple myeloma       | Female | 15-19 years | 95+ years | Global     | 1         | 1     | Tobacco (cigarettes per capita)                       | --              |
| Multiple myeloma       | Female | 15-19 years | 95+ years | Global     | -1        | 2     | Healthcare access and quality index                   | --              |
| Multiple myeloma       | Female | 15-19 years | 95+ years | Global     | -1        | 2     | Improved Water Source (proportion with access)        | --              |
| Multiple myeloma       | Female | 15-19 years | 95+ years | Global     | -1        | 2     | Sanitation (proportion with access)                   | --              |
| Multiple myeloma       | Female | 15-19 years | 95+ years | Global     | -1        | 2     | fruits adjusted(g)                                    | --              |
| Multiple myeloma       | Female | 15-19 years | 95+ years | Global     | -1        | 2     | vegetables adjusted(g)                                | --              |
| Multiple myeloma       | Female | 15-19 years | 95+ years | Global     | 1         | 2     | red meats adjusted(g)                                 | 430             |
| Multiple myeloma       | Female | 15-19 years | 95+ years | Global     | 1         | 2     | Mean BMI                                              | 648             |
| Multiple myeloma       | Female | 15-19 years | 95+ years | Global     | -1        | 3     | Education (years per capita)                          | --              |
| Multiple myeloma       | Female | 15-19 years | 95+ years | Global     | 0         | 3     | Socio-demographic Index                               | 327             |
| Multiple myeloma       | Female | 15-19 years | 95+ years | Global     | 0         | 3     | LDI (IS per capita)                                   | --              |
| Multiple myeloma       | Male   | 15-19 years | 95+ years | Data Rich  | 1         | 1     | Alcohol (liters per capita)                           | 677             |
| Multiple myeloma       | Male   | 15-19 years | 95+ years | Data Rich  | 1         | 1     | Smoking Prevalence                                    | --              |
| Multiple myeloma       | Male   | 15-19 years | 95+ years | Data Rich  | 1         | 1     | Tobacco (cigarettes per capita)                       | --              |
| Multiple myeloma       | Male   | 15-19 years | 95+ years | Data Rich  | -1        | 2     | Healthcare access and quality index                   | --              |
| Multiple myeloma       | Male   | 15-19 years | 95+ years | Data Rich  | -1        | 2     | Improved Water Source (proportion with access)        | --              |
| Multiple myeloma       | Male   | 15-19 years | 95+ years | Data Rich  | -1        | 2     | Sanitation (proportion with access)                   | --              |
| Multiple myeloma       | Male   | 15-19 years | 95+ years | Data Rich  | -1        | 2     | fruits adjusted(g)                                    | --              |
| Multiple myeloma       | Male   | 15-19 years | 95+ years | Data Rich  | -1        | 2     | vegetables adjusted(g)                                | --              |
| Multiple myeloma       | Male   | 15-19 years | 95+ years | Data Rich  | 1         | 2     | red meats adjusted(g)                                 | 707             |
| Multiple myeloma       | Male   | 15-19 years | 95+ years | Data Rich  | 1         | 2     | Mean BMI                                              | --              |
| Multiple myeloma       | Male   | 15-19 years | 95+ years | Data Rich  | -1        | 3     | Education (years per capita)                          | --              |
| Multiple myeloma       | Male   | 15-19 years | 95+ years | Data Rich  | 0         | 3     | Socio-demographic Index                               | 751             |
| Multiple myeloma       | Male   | 15-19 years | 95+ years | Data Rich  | 0         | 3     | LDI (IS per capita)                                   | --              |
| Multiple myeloma       | Male   | 15-19 years | 95+ years | Global     | 1         | 1     | Alcohol (liters per capita)                           | 1000            |
| Multiple myeloma       | Male   | 15-19 years | 95+ years | Global     | 1         | 1     | Smoking Prevalence                                    | --              |
| Multiple myeloma       | Male   | 15-19 years | 95+ years | Global     | 1         | 1     | Tobacco (cigarettes per capita)                       | --              |
| Multiple myeloma       | Male   | 15-19 years | 95+ years | Global     | -1        | 2     | Healthcare access and quality index                   | --              |
| Multiple myeloma       | Male   | 15-19 years | 95+ years | Global     | -1        | 2     | Improved Water Source (proportion with access)        | --              |
| Multiple myeloma       | Male   | 15-19 years | 95+ years | Global     | -1        | 2     | Sanitation (proportion with access)                   | --              |
| Multiple myeloma       | Male   | 15-19 years | 95+ years | Global     | -1        | 2     | fruits adjusted(g)                                    | --              |
| Multiple myeloma       | Male   | 15-19 years | 95+ years | Global     | -1        | 2     | vegetables adjusted(g)                                | --              |
| Multiple myeloma       | Male   | 15-19 years | 95+ years | Global     | 1         | 2     | Mean BMI                                              | 535             |
| Multiple myeloma       | Male   | 15-19 years | 95+ years | Global     | 1         | 2     | red meats adjusted(g)                                 | 535             |
| Multiple myeloma       | Male   | 15-19 years | 95+ years | Global     | -1        | 3     | Education (years per capita)                          | --              |
| Multiple myeloma       | Male   | 15-19 years | 95+ years | Global     | 0         | 3     | Socio-demographic Index                               | 463             |
| Multiple myeloma       | Male   | 15-19 years | 95+ years | Global     | 0         | 3     | LDI (IS per capita)                                   | --              |
| Leukaemia              | Female | 0-6 days    | 95+ years | Data Rich  | 1         | 1     | Log-transformed SEV scalar: Leukemia                  | 1000            |
| Leukaemia              | Female | 0-6 days    | 95+ years | Data Rich  | 1         | 1     | Log-transformed age-standardized SEV scalar: Leukemia | --              |
| Leukaemia              | Female | 0-6 days    | 95+ years | Data Rich  | -1        | 2     | Healthcare access and quality index                   | 351             |
| Leukaemia              | Female | 0-6 days    | 95+ years | Data Rich  | 1         | 2     | Tobacco (cigarettes per capita)                       | 51              |
| Leukaemia              | Female | 0-6 days    | 95+ years | Data Rich  | 1         | 2     | Smoking Prevalence                                    | 184             |
| Leukaemia              | Female | 0-6 days    | 95+ years | Data Rich  | 1         | 2     | Cumulative Cigarettes (15 Years)                      | 197             |
| Leukaemia              | Female | 0-6 days    | 95+ years | Data Rich  | 1         | 2     | Alcohol (liters per capita)                           | 759             |
| Leukaemia              | Female | 0-6 days    | 95+ years | Data Rich  | 1         | 2     | Cumulative Cigarettes (10 Years)                      | --              |
| Leukaemia              | Female | 0-6 days    | 95+ years | Data Rich  | 1         | 2     | Cumulative Cigarettes (20 Years)                      | --              |
| Leukaemia              | Female | 0-6 days    | 95+ years | Data Rich  | 1         | 2     | Cumulative Cigarettes (5 Years)                       | --              |
| Leukaemia              | Female | 0-6 days    | 95+ years | Data Rich  | 1         | 2     | Mean BMI                                              | --              |
| Leukaemia              | Female | 0-6 days    | 95+ years | Data Rich  | -1        | 3     | Education (years per capita)                          | 256             |
| Leukaemia              | Female | 0-6 days    | 95+ years | Data Rich  | 0         | 3     | Socio-demographic Index                               | 191             |
| Leukaemia              | Female | 0-6 days    | 95+ years | Data Rich  | 0         | 3     | LDI (IS per capita)                                   | --              |
| Leukaemia              | Female | 0-6 days    | 95+ years | Global     | 1         | 1     | Log-transformed age-standardized SEV scalar: Leukemia | 255             |
| Leukaemia              | Female | 0-6 days    | 95+ years | Global     | 1         | 1     | Log-transformed SEV scalar: Leukemia                  | --              |
| Leukaemia              | Female | 0-6 days    | 95+ years | Global     | -1        | 2     | Healthcare access and quality index                   | 525             |
| Leukaemia              | Female | 0-6 days    | 95+ years | Global     | 1         | 2     | Cumulative Cigarettes (15 Years)                      | 144             |



**Appendix Table 9: CODEm covariates used, level of covariate, and expected direction of covariate by cause, sex, and age**

*Covariates that CODEm did not select during the covariate selection process have no draw counts listed.*

| Cause                    | Sex    | Age Start | Age End   | Model Type | Direction | Level | Covariate Name                                        | Number of Draws |
|--------------------------|--------|-----------|-----------|------------|-----------|-------|-------------------------------------------------------|-----------------|
| Leukaemia                | Female | 0-6 days  | 95+ years | Global     | 1         | 2     | Cumulative Cigarettes (20 Years)                      | 381             |
| Leukaemia                | Female | 0-6 days  | 95+ years | Global     | 1         | 2     | Alcohol (liters per capita)                           | --              |
| Leukaemia                | Female | 0-6 days  | 95+ years | Global     | 1         | 2     | Cumulative Cigarettes (10 Years)                      | --              |
| Leukaemia                | Female | 0-6 days  | 95+ years | Global     | 1         | 2     | Cumulative Cigarettes (5 Years)                       | --              |
| Leukaemia                | Female | 0-6 days  | 95+ years | Global     | 1         | 2     | Mean BMI                                              | --              |
| Leukaemia                | Female | 0-6 days  | 95+ years | Global     | 1         | 2     | Smoking Prevalence                                    | --              |
| Leukaemia                | Female | 0-6 days  | 95+ years | Global     | 1         | 2     | Tobacco (cigarettes per capita)                       | --              |
| Leukaemia                | Female | 0-6 days  | 95+ years | Global     | -1        | 3     | Education (years per capita)                          | 328             |
| Leukaemia                | Female | 0-6 days  | 95+ years | Global     | 0         | 3     | Socio-demographic Index                               | 220             |
| Leukaemia                | Female | 0-6 days  | 95+ years | Global     | 0         | 3     | LDI (I\$ per capita)                                  | --              |
| Leukaemia                | Male   | 0-6 days  | 95+ years | Data Rich  | 1         | 1     | Log-transformed SEV scalar: Leukemia                  | 465             |
| Leukaemia                | Male   | 0-6 days  | 95+ years | Data Rich  | 1         | 1     | Log-transformed age-standardized SEV scalar: Leukemia | 571             |
| Leukaemia                | Male   | 0-6 days  | 95+ years | Data Rich  | -1        | 2     | Healthcare access and quality index                   | 329             |
| Leukaemia                | Male   | 0-6 days  | 95+ years | Data Rich  | 1         | 2     | Smoking Prevalence                                    | 0               |
| Leukaemia                | Male   | 0-6 days  | 95+ years | Data Rich  | 1         | 2     | Cumulative Cigarettes (10 Years)                      | 55              |
| Leukaemia                | Male   | 0-6 days  | 95+ years | Data Rich  | 1         | 2     | Cumulative Cigarettes (5 Years)                       | 99              |
| Leukaemia                | Male   | 0-6 days  | 95+ years | Data Rich  | 1         | 2     | Cumulative Cigarettes (20 Years)                      | 103             |
| Leukaemia                | Male   | 0-6 days  | 95+ years | Data Rich  | 1         | 2     | Cumulative Cigarettes (15 Years)                      | 105             |
| Leukaemia                | Male   | 0-6 days  | 95+ years | Data Rich  | 1         | 2     | Tobacco (cigarettes per capita)                       | 296             |
| Leukaemia                | Male   | 0-6 days  | 95+ years | Data Rich  | 1         | 2     | Mean BMI                                              | 429             |
| Leukaemia                | Male   | 0-6 days  | 95+ years | Data Rich  | 1         | 2     | Alcohol (liters per capita)                           | --              |
| Leukaemia                | Male   | 0-6 days  | 95+ years | Data Rich  | -1        | 3     | Education (years per capita)                          | 465             |
| Leukaemia                | Male   | 0-6 days  | 95+ years | Data Rich  | 0         | 3     | Socio-demographic Index                               | 636             |
| Leukaemia                | Male   | 0-6 days  | 95+ years | Data Rich  | 0         | 3     | LDI (I\$ per capita)                                  | --              |
| Leukaemia                | Male   | 0-6 days  | 95+ years | Global     | 1         | 1     | Log-transformed SEV scalar: Leukemia                  | --              |
| Leukaemia                | Male   | 0-6 days  | 95+ years | Global     | 1         | 1     | Log-transformed age-standardized SEV scalar: Leukemia | --              |
| Leukaemia                | Male   | 0-6 days  | 95+ years | Global     | -1        | 2     | Healthcare access and quality index                   | 416             |
| Leukaemia                | Male   | 0-6 days  | 95+ years | Global     | 1         | 2     | Cumulative Cigarettes (5 Years)                       | 198             |
| Leukaemia                | Male   | 0-6 days  | 95+ years | Global     | 1         | 2     | Smoking Prevalence                                    | 230             |
| Leukaemia                | Male   | 0-6 days  | 95+ years | Global     | 1         | 2     | Cumulative Cigarettes (10 Years)                      | 256             |
| Leukaemia                | Male   | 0-6 days  | 95+ years | Global     | 1         | 2     | Tobacco (cigarettes per capita)                       | 324             |
| Leukaemia                | Male   | 0-6 days  | 95+ years | Global     | 1         | 2     | Cumulative Cigarettes (20 Years)                      | 514             |
| Leukaemia                | Male   | 0-6 days  | 95+ years | Global     | 1         | 2     | Alcohol (liters per capita)                           | --              |
| Leukaemia                | Male   | 0-6 days  | 95+ years | Global     | 1         | 2     | Cumulative Cigarettes (15 Years)                      | --              |
| Leukaemia                | Male   | 0-6 days  | 95+ years | Global     | 1         | 2     | Mean BMI                                              | --              |
| Leukaemia                | Male   | 0-6 days  | 95+ years | Global     | -1        | 3     | Education (years per capita)                          | 32              |
| Leukaemia                | Male   | 0-6 days  | 95+ years | Global     | 0         | 3     | Socio-demographic Index                               | 457             |
| Leukaemia                | Male   | 0-6 days  | 95+ years | Global     | 0         | 3     | LDI (I\$ per capita)                                  | --              |
| Acute lymphoid leukaemia | Female | 0-6 days  | 95+ years | Data Rich  | 1         | 1     | Log-transformed age-standardized SEV scalar: Leukemia | 523             |
| Acute lymphoid leukaemia | Female | 0-6 days  | 95+ years | Data Rich  | 1         | 1     | Log-transformed SEV scalar: Leukemia                  | 837             |
| Acute lymphoid leukaemia | Female | 0-6 days  | 95+ years | Data Rich  | -1        | 2     | Healthcare access and quality index                   | 18              |
| Acute lymphoid leukaemia | Female | 0-6 days  | 95+ years | Data Rich  | 1         | 2     | Alcohol (liters per capita)                           | 18              |
| Acute lymphoid leukaemia | Female | 0-6 days  | 95+ years | Data Rich  | 1         | 2     | Cumulative Cigarettes (20 Years)                      | 22              |
| Acute lymphoid leukaemia | Female | 0-6 days  | 95+ years | Data Rich  | 1         | 2     | Mean BMI                                              | 199             |
| Acute lymphoid leukaemia | Female | 0-6 days  | 95+ years | Data Rich  | 1         | 2     | Tobacco (cigarettes per capita)                       | 383             |
| Acute lymphoid leukaemia | Female | 0-6 days  | 95+ years | Data Rich  | 1         | 2     | Cumulative Cigarettes (10 Years)                      | --              |
| Acute lymphoid leukaemia | Female | 0-6 days  | 95+ years | Data Rich  | 1         | 2     | Cumulative Cigarettes (15 Years)                      | --              |
| Acute lymphoid leukaemia | Female | 0-6 days  | 95+ years | Data Rich  | 1         | 2     | Cumulative Cigarettes (5 Years)                       | --              |
| Acute lymphoid leukaemia | Female | 0-6 days  | 95+ years | Data Rich  | 1         | 2     | Smoking Prevalence                                    | --              |
| Acute lymphoid leukaemia | Female | 0-6 days  | 95+ years | Data Rich  | -1        | 3     | Education (years per capita)                          | 295             |
| Acute lymphoid leukaemia | Female | 0-6 days  | 95+ years | Data Rich  | 0         | 3     | Socio-demographic Index                               | 612             |
| Acute lymphoid leukaemia | Female | 0-6 days  | 95+ years | Data Rich  | 0         | 3     | LDI (I\$ per capita)                                  | 646             |
| Acute lymphoid leukaemia | Female | 0-6 days  | 95+ years | Global     | 1         | 1     | Log-transformed age-standardized SEV scalar: Leukemia | 649             |
| Acute lymphoid leukaemia | Female | 0-6 days  | 95+ years | Global     | 1         | 1     | Log-transformed SEV scalar: Leukemia                  | 685             |
| Acute lymphoid leukaemia | Female | 0-6 days  | 95+ years | Global     | -1        | 2     | Healthcare access and quality index                   | --              |
| Acute lymphoid leukaemia | Female | 0-6 days  | 95+ years | Global     | 1         | 2     | Alcohol (liters per capita)                           | 34              |
| Acute lymphoid leukaemia | Female | 0-6 days  | 95+ years | Global     | 1         | 2     | Cumulative Cigarettes (20 Years)                      | 109             |
| Acute lymphoid leukaemia | Female | 0-6 days  | 95+ years | Global     | 1         | 2     | Mean BMI                                              | 229             |
| Acute lymphoid leukaemia | Female | 0-6 days  | 95+ years | Global     | 1         | 2     | Tobacco (cigarettes per capita)                       | 265             |
| Acute lymphoid leukaemia | Female | 0-6 days  | 95+ years | Global     | 1         | 2     | Cumulative Cigarettes (10 Years)                      | --              |
| Acute lymphoid leukaemia | Female | 0-6 days  | 95+ years | Global     | 1         | 2     | Cumulative Cigarettes (15 Years)                      | --              |
| Acute lymphoid leukaemia | Female | 0-6 days  | 95+ years | Global     | 1         | 2     | Cumulative Cigarettes (5 Years)                       | --              |
| Acute lymphoid leukaemia | Female | 0-6 days  | 95+ years | Global     | 1         | 2     | Smoking Prevalence                                    | --              |
| Acute lymphoid leukaemia | Female | 0-6 days  | 95+ years | Global     | -1        | 3     | Education (years per capita)                          | 463             |
| Acute lymphoid leukaemia | Female | 0-6 days  | 95+ years | Global     | 0         | 3     | Socio-demographic Index                               | 341             |
| Acute lymphoid leukaemia | Female | 0-6 days  | 95+ years | Global     | 0         | 3     | LDI (I\$ per capita)                                  | 462             |
| Acute lymphoid leukaemia | Male   | 0-6 days  | 95+ years | Data Rich  | 1         | 1     | Log-transformed age-standardized SEV scalar: Leukemia | 440             |
| Acute lymphoid leukaemia | Male   | 0-6 days  | 95+ years | Data Rich  | 1         | 1     | Log-transformed SEV scalar: Leukemia                  | 653             |
| Acute lymphoid leukaemia | Male   | 0-6 days  | 95+ years | Data Rich  | -1        | 2     | Healthcare access and quality index                   | 3               |
| Acute lymphoid leukaemia | Male   | 0-6 days  | 95+ years | Data Rich  | 1         | 2     | Tobacco (cigarettes per capita)                       | 141             |
| Acute lymphoid leukaemia | Male   | 0-6 days  | 95+ years | Data Rich  | 1         | 2     | Mean BMI                                              | 508             |
| Acute lymphoid leukaemia | Male   | 0-6 days  | 95+ years | Data Rich  | 1         | 2     | Alcohol (liters per capita)                           | --              |
| Acute lymphoid leukaemia | Male   | 0-6 days  | 95+ years | Data Rich  | 1         | 2     | Cumulative Cigarettes (10 Years)                      | --              |
| Acute lymphoid leukaemia | Male   | 0-6 days  | 95+ years | Data Rich  | 1         | 2     | Cumulative Cigarettes (15 Years)                      | --              |
| Acute lymphoid leukaemia | Male   | 0-6 days  | 95+ years | Data Rich  | 1         | 2     | Cumulative Cigarettes (20 Years)                      | --              |
| Acute lymphoid leukaemia | Male   | 0-6 days  | 95+ years | Data Rich  | 1         | 2     | Cumulative Cigarettes (5 Years)                       | --              |
| Acute lymphoid leukaemia | Male   | 0-6 days  | 95+ years | Data Rich  | 1         | 2     | Smoking Prevalence                                    | --              |
| Acute lymphoid leukaemia | Male   | 0-6 days  | 95+ years | Data Rich  | -1        | 3     | Education (years per capita)                          | 171             |

**Appendix Table 9: CODEm covariates used, level of covariate, and expected direction of covariate by cause, sex, and age**

*Covariates that CODEm did not select during the covariate selection process have no draw counts listed.*

| Cause                      | Sex    | Age Start   | Age End   | Model Type | Direction | Level | Covariate Name                                        | Number of Draws |
|----------------------------|--------|-------------|-----------|------------|-----------|-------|-------------------------------------------------------|-----------------|
| Acute lymphoid leukaemia   | Male   | 0-6 days    | 95+ years | Data Rich  | 0         | 3     | Socio-demographic Index                               | 539             |
| Acute lymphoid leukaemia   | Male   | 0-6 days    | 95+ years | Data Rich  | 0         | 3     | LDI (I\$ per capita)                                  | 579             |
| Acute lymphoid leukaemia   | Male   | 0-6 days    | 95+ years | Global     | 1         | 1     | Log-transformed SEV scalar: Leukemia                  | 409             |
| Acute lymphoid leukaemia   | Male   | 0-6 days    | 95+ years | Global     | 1         | 1     | Log-transformed age-standardized SEV scalar: Leukemia | 722             |
| Acute lymphoid leukaemia   | Male   | 0-6 days    | 95+ years | Global     | -1        | 2     | Healthcare access and quality index                   | --              |
| Acute lymphoid leukaemia   | Male   | 0-6 days    | 95+ years | Global     | 1         | 2     | Cumulative Cigarettes (20 Years)                      | 12              |
| Acute lymphoid leukaemia   | Male   | 0-6 days    | 95+ years | Global     | 1         | 2     | Smoking Prevalence                                    | 17              |
| Acute lymphoid leukaemia   | Male   | 0-6 days    | 95+ years | Global     | 1         | 2     | Tobacco (cigarettes per capita)                       | 131             |
| Acute lymphoid leukaemia   | Male   | 0-6 days    | 95+ years | Global     | 1         | 2     | Mean BMI                                              | 289             |
| Acute lymphoid leukaemia   | Male   | 0-6 days    | 95+ years | Global     | 1         | 2     | Alcohol (liters per capita)                           | --              |
| Acute lymphoid leukaemia   | Male   | 0-6 days    | 95+ years | Global     | 1         | 2     | Cumulative Cigarettes (10 Years)                      | --              |
| Acute lymphoid leukaemia   | Male   | 0-6 days    | 95+ years | Global     | 1         | 2     | Cumulative Cigarettes (15 Years)                      | --              |
| Acute lymphoid leukaemia   | Male   | 0-6 days    | 95+ years | Global     | 1         | 2     | Cumulative Cigarettes (5 Years)                       | --              |
| Acute lymphoid leukaemia   | Male   | 0-6 days    | 95+ years | Global     | -1        | 3     | Education (years per capita)                          | 103             |
| Acute lymphoid leukaemia   | Male   | 0-6 days    | 95+ years | Global     | 0         | 3     | Socio-demographic Index                               | 235             |
| Acute lymphoid leukaemia   | Male   | 0-6 days    | 95+ years | Global     | 0         | 3     | LDI (I\$ per capita)                                  | 536             |
| Chronic lymphoid leukaemia | Female | 15-19 years | 95+ years | Data Rich  | 1         | 1     | Log-transformed age-standardized SEV scalar: Leukemia | 819             |
| Chronic lymphoid leukaemia | Female | 15-19 years | 95+ years | Data Rich  | 1         | 1     | Log-transformed SEV scalar: Leukemia                  | 964             |
| Chronic lymphoid leukaemia | Female | 15-19 years | 95+ years | Data Rich  | -1        | 2     | Healthcare access and quality index                   | 102             |
| Chronic lymphoid leukaemia | Female | 15-19 years | 95+ years | Data Rich  | 1         | 2     | Cumulative Cigarettes (20 Years)                      | 40              |
| Chronic lymphoid leukaemia | Female | 15-19 years | 95+ years | Data Rich  | 1         | 2     | Cumulative Cigarettes (5 Years)                       | 53              |
| Chronic lymphoid leukaemia | Female | 15-19 years | 95+ years | Data Rich  | 1         | 2     | Cumulative Cigarettes (10 Years)                      | 109             |
| Chronic lymphoid leukaemia | Female | 15-19 years | 95+ years | Data Rich  | 1         | 2     | Tobacco (cigarettes per capita)                       | 180             |
| Chronic lymphoid leukaemia | Female | 15-19 years | 95+ years | Data Rich  | 1         | 2     | Smoking Prevalence                                    | 322             |
| Chronic lymphoid leukaemia | Female | 15-19 years | 95+ years | Data Rich  | 1         | 2     | Mean BMI                                              | 429             |
| Chronic lymphoid leukaemia | Female | 15-19 years | 95+ years | Data Rich  | 1         | 2     | Alcohol (liters per capita)                           | 568             |
| Chronic lymphoid leukaemia | Female | 15-19 years | 95+ years | Data Rich  | 1         | 2     | Cumulative Cigarettes (15 Years)                      | 594             |
| Chronic lymphoid leukaemia | Female | 15-19 years | 95+ years | Data Rich  | -1        | 3     | Education (years per capita)                          | 212             |
| Chronic lymphoid leukaemia | Female | 15-19 years | 95+ years | Data Rich  | 0         | 3     | Socio-demographic Index                               | 46              |
| Chronic lymphoid leukaemia | Female | 15-19 years | 95+ years | Data Rich  | 0         | 3     | LDI (I\$ per capita)                                  | 347             |
| Chronic lymphoid leukaemia | Female | 15-19 years | 95+ years | Global     | 1         | 1     | Log-transformed age-standardized SEV scalar: Leukemia | 160             |
| Chronic lymphoid leukaemia | Female | 15-19 years | 95+ years | Global     | 1         | 1     | Log-transformed SEV scalar: Leukemia                  | 600             |
| Chronic lymphoid leukaemia | Female | 15-19 years | 95+ years | Global     | 1         | 1     | Healthcare access and quality index                   | 814             |
| Chronic lymphoid leukaemia | Female | 15-19 years | 95+ years | Global     | 1         | 2     | Mean BMI                                              | 0               |
| Chronic lymphoid leukaemia | Female | 15-19 years | 95+ years | Global     | 1         | 2     | Cumulative Cigarettes (5 Years)                       | 111             |
| Chronic lymphoid leukaemia | Female | 15-19 years | 95+ years | Global     | 1         | 2     | Cumulative Cigarettes (15 Years)                      | 206             |
| Chronic lymphoid leukaemia | Female | 15-19 years | 95+ years | Global     | 1         | 2     | Tobacco (cigarettes per capita)                       | 239             |
| Chronic lymphoid leukaemia | Female | 15-19 years | 95+ years | Global     | 1         | 2     | Smoking Prevalence                                    | 338             |
| Chronic lymphoid leukaemia | Female | 15-19 years | 95+ years | Global     | 1         | 2     | Cumulative Cigarettes (10 Years)                      | 552             |
| Chronic lymphoid leukaemia | Female | 15-19 years | 95+ years | Global     | 1         | 2     | Cumulative Cigarettes (20 Years)                      | 600             |
| Chronic lymphoid leukaemia | Female | 15-19 years | 95+ years | Global     | 1         | 2     | Alcohol (liters per capita)                           | 676             |
| Chronic lymphoid leukaemia | Female | 15-19 years | 95+ years | Global     | -1        | 3     | Education (years per capita)                          | 25              |
| Chronic lymphoid leukaemia | Female | 15-19 years | 95+ years | Global     | 0         | 3     | LDI (I\$ per capita)                                  | 223             |
| Chronic lymphoid leukaemia | Female | 15-19 years | 95+ years | Global     | 0         | 3     | Socio-demographic Index                               | 229             |
| Chronic lymphoid leukaemia | Male   | 15-19 years | 95+ years | Data Rich  | 1         | 1     | Log-transformed SEV scalar: Leukemia                  | 315             |
| Chronic lymphoid leukaemia | Male   | 15-19 years | 95+ years | Data Rich  | 1         | 1     | Log-transformed age-standardized SEV scalar: Leukemia | 1000            |
| Chronic lymphoid leukaemia | Male   | 15-19 years | 95+ years | Data Rich  | -1        | 2     | Healthcare access and quality index                   | 226             |
| Chronic lymphoid leukaemia | Male   | 15-19 years | 95+ years | Data Rich  | 1         | 2     | Tobacco (cigarettes per capita)                       | 16              |
| Chronic lymphoid leukaemia | Male   | 15-19 years | 95+ years | Data Rich  | 1         | 2     | Cumulative Cigarettes (10 Years)                      | 42              |
| Chronic lymphoid leukaemia | Male   | 15-19 years | 95+ years | Data Rich  | 1         | 2     | Cumulative Cigarettes (20 Years)                      | 75              |
| Chronic lymphoid leukaemia | Male   | 15-19 years | 95+ years | Data Rich  | 1         | 2     | Cumulative Cigarettes (15 Years)                      | 107             |
| Chronic lymphoid leukaemia | Male   | 15-19 years | 95+ years | Data Rich  | 1         | 2     | Mean BMI                                              | 578             |
| Chronic lymphoid leukaemia | Male   | 15-19 years | 95+ years | Data Rich  | 1         | 2     | Alcohol (liters per capita)                           | --              |
| Chronic lymphoid leukaemia | Male   | 15-19 years | 95+ years | Data Rich  | 1         | 2     | Cumulative Cigarettes (5 Years)                       | --              |
| Chronic lymphoid leukaemia | Male   | 15-19 years | 95+ years | Data Rich  | 1         | 2     | Smoking Prevalence                                    | --              |
| Chronic lymphoid leukaemia | Male   | 15-19 years | 95+ years | Data Rich  | -1        | 3     | Education (years per capita)                          | 12              |
| Chronic lymphoid leukaemia | Male   | 15-19 years | 95+ years | Data Rich  | 0         | 3     | LDI (I\$ per capita)                                  | 253             |
| Chronic lymphoid leukaemia | Male   | 15-19 years | 95+ years | Data Rich  | 0         | 3     | Socio-demographic Index                               | 373             |
| Chronic lymphoid leukaemia | Male   | 15-19 years | 95+ years | Global     | 1         | 1     | Log-transformed SEV scalar: Leukemia                  | 134             |
| Chronic lymphoid leukaemia | Male   | 15-19 years | 95+ years | Global     | 1         | 1     | Log-transformed age-standardized SEV scalar: Leukemia | 866             |
| Chronic lymphoid leukaemia | Male   | 15-19 years | 95+ years | Global     | -1        | 2     | Healthcare access and quality index                   | 250             |
| Chronic lymphoid leukaemia | Male   | 15-19 years | 95+ years | Global     | 1         | 2     | Tobacco (cigarettes per capita)                       | 22              |
| Chronic lymphoid leukaemia | Male   | 15-19 years | 95+ years | Global     | 1         | 2     | Cumulative Cigarettes (15 Years)                      | 27              |
| Chronic lymphoid leukaemia | Male   | 15-19 years | 95+ years | Global     | 1         | 2     | Cumulative Cigarettes (10 Years)                      | 137             |
| Chronic lymphoid leukaemia | Male   | 15-19 years | 95+ years | Global     | 1         | 2     | Cumulative Cigarettes (20 Years)                      | 137             |
| Chronic lymphoid leukaemia | Male   | 15-19 years | 95+ years | Global     | 1         | 2     | Cumulative Cigarettes (5 Years)                       | 146             |
| Chronic lymphoid leukaemia | Male   | 15-19 years | 95+ years | Global     | 1         | 2     | Mean BMI                                              | 287             |
| Chronic lymphoid leukaemia | Male   | 15-19 years | 95+ years | Global     | 1         | 2     | Alcohol (liters per capita)                           | --              |
| Chronic lymphoid leukaemia | Male   | 15-19 years | 95+ years | Global     | 1         | 2     | Smoking Prevalence                                    | --              |
| Chronic lymphoid leukaemia | Male   | 15-19 years | 95+ years | Global     | -1        | 3     | Education (years per capita)                          | 55              |
| Chronic lymphoid leukaemia | Male   | 15-19 years | 95+ years | Global     | 0         | 3     | Socio-demographic Index                               | 345             |
| Chronic lymphoid leukaemia | Male   | 15-19 years | 95+ years | Global     | 0         | 3     | LDI (I\$ per capita)                                  | 469             |
| Acute myeloid leukaemia    | Female | 0-6 days    | 95+ years | Data Rich  | 1         | 1     | Log-transformed age-standardized SEV scalar: Leukemia | 867             |
| Acute myeloid leukaemia    | Female | 0-6 days    | 95+ years | Data Rich  | 1         | 1     | Log-transformed SEV scalar: Leukemia                  | 1000            |
| Acute myeloid leukaemia    | Female | 0-6 days    | 95+ years | Data Rich  | -1        | 2     | Healthcare access and quality index                   | --              |
| Acute myeloid leukaemia    | Female | 0-6 days    | 95+ years | Data Rich  | 1         | 2     | Tobacco (cigarettes per capita)                       | 147             |
| Acute myeloid leukaemia    | Female | 0-6 days    | 95+ years | Data Rich  | 1         | 2     | Alcohol (liters per capita)                           | 356             |
| Acute myeloid leukaemia    | Female | 0-6 days    | 95+ years | Data Rich  | 1         | 2     | Cumulative Cigarettes (10 Years)                      | --              |

**Appendix Table 9: CODEm covariates used, level of covariate, and expected direction of covariate by cause, sex, and age**  
*Covariates that CODEm did not select during the covariate selection process have no draw counts listed.*

| Cause                     | Sex    | Age Start   | Age End   | Model Type | Direction | Level | Covariate Name                                        | Number of Draws |
|---------------------------|--------|-------------|-----------|------------|-----------|-------|-------------------------------------------------------|-----------------|
| Acute myeloid leukaemia   | Female | 0-6 days    | 95+ years | Data Rich  | 1         | 2     | Cumulative Cigarettes (15 Years)                      | --              |
| Acute myeloid leukaemia   | Female | 0-6 days    | 95+ years | Data Rich  | 1         | 2     | Cumulative Cigarettes (20 Years)                      | --              |
| Acute myeloid leukaemia   | Female | 0-6 days    | 95+ years | Data Rich  | 1         | 2     | Cumulative Cigarettes (5 Years)                       | --              |
| Acute myeloid leukaemia   | Female | 0-6 days    | 95+ years | Data Rich  | 1         | 2     | Mean BMI                                              | --              |
| Acute myeloid leukaemia   | Female | 0-6 days    | 95+ years | Data Rich  | 1         | 2     | Smoking Prevalence                                    | --              |
| Acute myeloid leukaemia   | Female | 0-6 days    | 95+ years | Data Rich  | -1        | 3     | Education (years per capita)                          | --              |
| Acute myeloid leukaemia   | Female | 0-6 days    | 95+ years | Data Rich  | 0         | 3     | LDI (I\$ per capita)                                  | --              |
| Acute myeloid leukaemia   | Female | 0-6 days    | 95+ years | Data Rich  | 0         | 3     | Socio-demographic Index                               | --              |
| Acute myeloid leukaemia   | Female | 0-6 days    | 95+ years | Global     | 1         | 1     | Log-transformed age-standardized SEV scalar: Leukemia | 577             |
| Acute myeloid leukaemia   | Female | 0-6 days    | 95+ years | Global     | 1         | 1     | Log-transformed SEV scalar: Leukemia                  | 623             |
| Acute myeloid leukaemia   | Female | 0-6 days    | 95+ years | Global     | -1        | 2     | Healthcare access and quality index                   | --              |
| Acute myeloid leukaemia   | Female | 0-6 days    | 95+ years | Global     | 1         | 2     | Tobacco (cigarettes per capita)                       | 42              |
| Acute myeloid leukaemia   | Female | 0-6 days    | 95+ years | Global     | 1         | 2     | Cumulative Cigarettes (10 Years)                      | 46              |
| Acute myeloid leukaemia   | Female | 0-6 days    | 95+ years | Global     | 1         | 2     | Cumulative Cigarettes (5 Years)                       | 49              |
| Acute myeloid leukaemia   | Female | 0-6 days    | 95+ years | Global     | 1         | 2     | Alcohol (liters per capita)                           | 485             |
| Acute myeloid leukaemia   | Female | 0-6 days    | 95+ years | Global     | 1         | 2     | Cumulative Cigarettes (15 Years)                      | --              |
| Acute myeloid leukaemia   | Female | 0-6 days    | 95+ years | Global     | 1         | 2     | Cumulative Cigarettes (20 Years)                      | --              |
| Acute myeloid leukaemia   | Female | 0-6 days    | 95+ years | Global     | 1         | 2     | Mean BMI                                              | --              |
| Acute myeloid leukaemia   | Female | 0-6 days    | 95+ years | Global     | 1         | 2     | Smoking Prevalence                                    | --              |
| Acute myeloid leukaemia   | Female | 0-6 days    | 95+ years | Global     | -1        | 3     | Education (years per capita)                          | --              |
| Acute myeloid leukaemia   | Female | 0-6 days    | 95+ years | Global     | 0         | 3     | Socio-demographic Index                               | 192             |
| Acute myeloid leukaemia   | Female | 0-6 days    | 95+ years | Global     | 0         | 3     | LDI (I\$ per capita)                                  | --              |
| Acute myeloid leukaemia   | Male   | 0-6 days    | 95+ years | Data Rich  | 1         | 1     | Log-transformed SEV scalar: Leukemia                  | 330             |
| Acute myeloid leukaemia   | Male   | 0-6 days    | 95+ years | Data Rich  | 1         | 1     | Log-transformed age-standardized SEV scalar: Leukemia | 779             |
| Acute myeloid leukaemia   | Male   | 0-6 days    | 95+ years | Data Rich  | -1        | 2     | Healthcare access and quality index                   | --              |
| Acute myeloid leukaemia   | Male   | 0-6 days    | 95+ years | Data Rich  | 1         | 2     | Tobacco (cigarettes per capita)                       | 105             |
| Acute myeloid leukaemia   | Male   | 0-6 days    | 95+ years | Data Rich  | 1         | 2     | Alcohol (liters per capita)                           | 271             |
| Acute myeloid leukaemia   | Male   | 0-6 days    | 95+ years | Data Rich  | 1         | 2     | Cumulative Cigarettes (5 Years)                       | 271             |
| Acute myeloid leukaemia   | Male   | 0-6 days    | 95+ years | Data Rich  | 1         | 2     | Mean BMI                                              | 705             |
| Acute myeloid leukaemia   | Male   | 0-6 days    | 95+ years | Data Rich  | 1         | 2     | Cumulative Cigarettes (10 Years)                      | --              |
| Acute myeloid leukaemia   | Male   | 0-6 days    | 95+ years | Data Rich  | 1         | 2     | Cumulative Cigarettes (15 Years)                      | --              |
| Acute myeloid leukaemia   | Male   | 0-6 days    | 95+ years | Data Rich  | 1         | 2     | Cumulative Cigarettes (20 Years)                      | --              |
| Acute myeloid leukaemia   | Male   | 0-6 days    | 95+ years | Data Rich  | 1         | 2     | Smoking Prevalence                                    | --              |
| Acute myeloid leukaemia   | Male   | 0-6 days    | 95+ years | Data Rich  | -1        | 3     | Education (years per capita)                          | 12              |
| Acute myeloid leukaemia   | Male   | 0-6 days    | 95+ years | Data Rich  | 0         | 3     | Socio-demographic Index                               | 281             |
| Acute myeloid leukaemia   | Male   | 0-6 days    | 95+ years | Data Rich  | 0         | 3     | LDI (I\$ per capita)                                  | --              |
| Acute myeloid leukaemia   | Male   | 0-6 days    | 95+ years | Global     | 1         | 1     | Log-transformed age-standardized SEV scalar: Leukemia | 243             |
| Acute myeloid leukaemia   | Male   | 0-6 days    | 95+ years | Global     | 1         | 1     | Log-transformed SEV scalar: Leukemia                  | 757             |
| Acute myeloid leukaemia   | Male   | 0-6 days    | 95+ years | Global     | -1        | 2     | Healthcare access and quality index                   | --              |
| Acute myeloid leukaemia   | Male   | 0-6 days    | 95+ years | Global     | 1         | 2     | Cumulative Cigarettes (5 Years)                       | 184             |
| Acute myeloid leukaemia   | Male   | 0-6 days    | 95+ years | Global     | 1         | 2     | Mean BMI                                              | 189             |
| Acute myeloid leukaemia   | Male   | 0-6 days    | 95+ years | Global     | 1         | 2     | Tobacco (cigarettes per capita)                       | 259             |
| Acute myeloid leukaemia   | Male   | 0-6 days    | 95+ years | Global     | 1         | 2     | Alcohol (liters per capita)                           | 288             |
| Acute myeloid leukaemia   | Male   | 0-6 days    | 95+ years | Global     | 1         | 2     | Cumulative Cigarettes (10 Years)                      | --              |
| Acute myeloid leukaemia   | Male   | 0-6 days    | 95+ years | Global     | 1         | 2     | Cumulative Cigarettes (15 Years)                      | --              |
| Acute myeloid leukaemia   | Male   | 0-6 days    | 95+ years | Global     | 1         | 2     | Cumulative Cigarettes (20 Years)                      | --              |
| Acute myeloid leukaemia   | Male   | 0-6 days    | 95+ years | Global     | 1         | 2     | Smoking Prevalence                                    | --              |
| Acute myeloid leukaemia   | Male   | 0-6 days    | 95+ years | Global     | -1        | 3     | Education (years per capita)                          | --              |
| Acute myeloid leukaemia   | Male   | 0-6 days    | 95+ years | Global     | 0         | 3     | Socio-demographic Index                               | 307             |
| Acute myeloid leukaemia   | Male   | 0-6 days    | 95+ years | Global     | 0         | 3     | LDI (I\$ per capita)                                  | --              |
| Chronic myeloid leukaemia | Female | 28-364 days | 95+ years | Data Rich  | 1         | 1     | Log-transformed SEV scalar: Leukemia                  | --              |
| Chronic myeloid leukaemia | Female | 28-364 days | 95+ years | Data Rich  | 1         | 1     | Log-transformed age-standardized SEV scalar: Leukemia | --              |
| Chronic myeloid leukaemia | Female | 28-364 days | 95+ years | Data Rich  | -1        | 2     | Healthcare access and quality index                   | 702             |
| Chronic myeloid leukaemia | Female | 28-364 days | 95+ years | Data Rich  | 1         | 2     | Cumulative Cigarettes (5 Years)                       | 50              |
| Chronic myeloid leukaemia | Female | 28-364 days | 95+ years | Data Rich  | 1         | 2     | Cumulative Cigarettes (10 Years)                      | 118             |
| Chronic myeloid leukaemia | Female | 28-364 days | 95+ years | Data Rich  | 1         | 2     | Cumulative Cigarettes (20 Years)                      | 239             |
| Chronic myeloid leukaemia | Female | 28-364 days | 95+ years | Data Rich  | 1         | 2     | Cumulative Cigarettes (15 Years)                      | 317             |
| Chronic myeloid leukaemia | Female | 28-364 days | 95+ years | Data Rich  | 1         | 2     | Smoking Prevalence                                    | 327             |
| Chronic myeloid leukaemia | Female | 28-364 days | 95+ years | Data Rich  | 1         | 2     | Alcohol (liters per capita)                           | 432             |
| Chronic myeloid leukaemia | Female | 28-364 days | 95+ years | Data Rich  | 1         | 2     | Tobacco (cigarettes per capita)                       | 507             |
| Chronic myeloid leukaemia | Female | 28-364 days | 95+ years | Data Rich  | 1         | 2     | Mean BMI                                              | --              |
| Chronic myeloid leukaemia | Female | 28-364 days | 95+ years | Data Rich  | -1        | 3     | Education (years per capita)                          | 418             |
| Chronic myeloid leukaemia | Female | 28-364 days | 95+ years | Data Rich  | 0         | 3     | Socio-demographic Index                               | 673             |
| Chronic myeloid leukaemia | Female | 28-364 days | 95+ years | Data Rich  | 0         | 3     | LDI (I\$ per capita)                                  | --              |
| Chronic myeloid leukaemia | Female | 28-364 days | 95+ years | Global     | 1         | 1     | Log-transformed SEV scalar: Leukemia                  | --              |
| Chronic myeloid leukaemia | Female | 28-364 days | 95+ years | Global     | 1         | 1     | Log-transformed age-standardized SEV scalar: Leukemia | --              |
| Chronic myeloid leukaemia | Female | 28-364 days | 95+ years | Global     | -1        | 2     | Healthcare access and quality index                   | 939             |
| Chronic myeloid leukaemia | Female | 28-364 days | 95+ years | Global     | 1         | 2     | Cumulative Cigarettes (5 Years)                       | 109             |
| Chronic myeloid leukaemia | Female | 28-364 days | 95+ years | Global     | 1         | 2     | Cumulative Cigarettes (15 Years)                      | 148             |
| Chronic myeloid leukaemia | Female | 28-364 days | 95+ years | Global     | 1         | 2     | Cumulative Cigarettes (20 Years)                      | 265             |
| Chronic myeloid leukaemia | Female | 28-364 days | 95+ years | Global     | 1         | 2     | Cumulative Cigarettes (10 Years)                      | 417             |
| Chronic myeloid leukaemia | Female | 28-364 days | 95+ years | Global     | 1         | 2     | Smoking Prevalence                                    | 501             |
| Chronic myeloid leukaemia | Female | 28-364 days | 95+ years | Global     | 1         | 2     | Tobacco (cigarettes per capita)                       | 669             |
| Chronic myeloid leukaemia | Female | 28-364 days | 95+ years | Global     | 1         | 2     | Alcohol (liters per capita)                           | 778             |
| Chronic myeloid leukaemia | Female | 28-364 days | 95+ years | Global     | 1         | 2     | Mean BMI                                              | --              |
| Chronic myeloid leukaemia | Female | 28-364 days | 95+ years | Global     | -1        | 3     | Education (years per capita)                          | 131             |
| Chronic myeloid leukaemia | Female | 28-364 days | 95+ years | Global     | 0         | 3     | Socio-demographic Index                               | 217             |
| Chronic myeloid leukaemia | Female | 28-364 days | 95+ years | Global     | 0         | 3     | LDI (I\$ per capita)                                  | --              |

**Appendix Table 9: CODEm covariates used, level of covariate, and expected direction of covariate by cause, sex, and age**

*Covariates that CODEm did not select during the covariate selection process have no draw counts listed.*

| Cause                     | Sex    | Age Start   | Age End   | Model Type | Direction | Level | Covariate Name                                        | Number of Draws |
|---------------------------|--------|-------------|-----------|------------|-----------|-------|-------------------------------------------------------|-----------------|
| Chronic myeloid leukaemia | Male   | 28-364 days | 95+ years | Data Rich  | 1         | 1     | Log-transformed age-standardized SEV scalar: Leukemia | 139             |
| Chronic myeloid leukaemia | Male   | 28-364 days | 95+ years | Data Rich  | 1         | 1     | Log-transformed SEV scalar: Leukemia                  | 888             |
| Chronic myeloid leukaemia | Male   | 28-364 days | 95+ years | Data Rich  | -1        | 2     | Healthcare access and quality index                   | 274             |
| Chronic myeloid leukaemia | Male   | 28-364 days | 95+ years | Data Rich  | 1         | 2     | Cumulative Cigarettes (20 Years)                      | 37              |
| Chronic myeloid leukaemia | Male   | 28-364 days | 95+ years | Data Rich  | 1         | 2     | Cumulative Cigarettes (15 Years)                      | 47              |
| Chronic myeloid leukaemia | Male   | 28-364 days | 95+ years | Data Rich  | 1         | 2     | Tobacco (cigarettes per capita)                       | 54              |
| Chronic myeloid leukaemia | Male   | 28-364 days | 95+ years | Data Rich  | 1         | 2     | Cumulative Cigarettes (10 Years)                      | 79              |
| Chronic myeloid leukaemia | Male   | 28-364 days | 95+ years | Data Rich  | 1         | 2     | Cumulative Cigarettes (5 Years)                       | 111             |
| Chronic myeloid leukaemia | Male   | 28-364 days | 95+ years | Data Rich  | 1         | 2     | Alcohol (liters per capita)                           | 321             |
| Chronic myeloid leukaemia | Male   | 28-364 days | 95+ years | Data Rich  | 1         | 2     | Smoking Prevalence                                    | 496             |
| Chronic myeloid leukaemia | Male   | 28-364 days | 95+ years | Data Rich  | 1         | 2     | Mean BMI                                              | --              |
| Chronic myeloid leukaemia | Male   | 28-364 days | 95+ years | Data Rich  | -1        | 3     | Education (years per capita)                          | 274             |
| Chronic myeloid leukaemia | Male   | 28-364 days | 95+ years | Data Rich  | 0         | 3     | Socio-demographic Index                               | 286             |
| Chronic myeloid leukaemia | Male   | 28-364 days | 95+ years | Data Rich  | 0         | 3     | LDI (I\$ per capita)                                  | --              |
| Chronic myeloid leukaemia | Male   | 28-364 days | 95+ years | Global     | 1         | 1     | Log-transformed age-standardized SEV scalar: Leukemia | 617             |
| Chronic myeloid leukaemia | Male   | 28-364 days | 95+ years | Global     | 1         | 1     | Log-transformed SEV scalar: Leukemia                  | 706             |
| Chronic myeloid leukaemia | Male   | 28-364 days | 95+ years | Global     | -1        | 2     | Healthcare access and quality index                   | 224             |
| Chronic myeloid leukaemia | Male   | 28-364 days | 95+ years | Global     | 1         | 2     | Alcohol (liters per capita)                           | 55              |
| Chronic myeloid leukaemia | Male   | 28-364 days | 95+ years | Global     | 1         | 2     | Cumulative Cigarettes (5 Years)                       | 83              |
| Chronic myeloid leukaemia | Male   | 28-364 days | 95+ years | Global     | 1         | 2     | Cumulative Cigarettes (10 Years)                      | 187             |
| Chronic myeloid leukaemia | Male   | 28-364 days | 95+ years | Global     | 1         | 2     | Cumulative Cigarettes (15 Years)                      | 293             |
| Chronic myeloid leukaemia | Male   | 28-364 days | 95+ years | Global     | 1         | 2     | Smoking Prevalence                                    | 320             |
| Chronic myeloid leukaemia | Male   | 28-364 days | 95+ years | Global     | 1         | 2     | Cumulative Cigarettes (20 Years)                      | 397             |
| Chronic myeloid leukaemia | Male   | 28-364 days | 95+ years | Global     | 1         | 2     | Tobacco (cigarettes per capita)                       | 790             |
| Chronic myeloid leukaemia | Male   | 28-364 days | 95+ years | Global     | 1         | 2     | Mean BMI                                              | --              |
| Chronic myeloid leukaemia | Male   | 28-364 days | 95+ years | Global     | -1        | 3     | Education (years per capita)                          | 374             |
| Chronic myeloid leukaemia | Male   | 28-364 days | 95+ years | Global     | 0         | 3     | Socio-demographic Index                               | 302             |
| Chronic myeloid leukaemia | Male   | 28-364 days | 95+ years | Global     | 0         | 3     | LDI (I\$ per capita)                                  | --              |
| Other leukaemia           | Female | 0-6 days    | 95+ years | Data Rich  | 1         | 1     | Log-transformed SEV scalar: Leukemia                  | --              |
| Other leukaemia           | Female | 0-6 days    | 95+ years | Data Rich  | 1         | 1     | Log-transformed age-standardized SEV scalar: Leukemia | --              |
| Other leukaemia           | Female | 0-6 days    | 95+ years | Data Rich  | -1        | 2     | Healthcare access and quality index                   | 380             |
| Other leukaemia           | Female | 0-6 days    | 95+ years | Data Rich  | 1         | 2     | Cumulative Cigarettes (15 Years)                      | 206             |
| Other leukaemia           | Female | 0-6 days    | 95+ years | Data Rich  | 1         | 2     | Cumulative Cigarettes (20 Years)                      | 245             |
| Other leukaemia           | Female | 0-6 days    | 95+ years | Data Rich  | 1         | 2     | Smoking Prevalence                                    | 267             |
| Other leukaemia           | Female | 0-6 days    | 95+ years | Data Rich  | 1         | 2     | Cumulative Cigarettes (5 Years)                       | 279             |
| Other leukaemia           | Female | 0-6 days    | 95+ years | Data Rich  | 1         | 2     | Cumulative Cigarettes (10 Years)                      | 459             |
| Other leukaemia           | Female | 0-6 days    | 95+ years | Data Rich  | 1         | 2     | Alcohol (liters per capita)                           | --              |
| Other leukaemia           | Female | 0-6 days    | 95+ years | Data Rich  | 1         | 2     | Mean BMI                                              | --              |
| Other leukaemia           | Female | 0-6 days    | 95+ years | Data Rich  | 1         | 2     | Tobacco (cigarettes per capita)                       | --              |
| Other leukaemia           | Female | 0-6 days    | 95+ years | Data Rich  | -1        | 3     | Education (years per capita)                          | 18              |
| Other leukaemia           | Female | 0-6 days    | 95+ years | Data Rich  | 0         | 3     | LDI (I\$ per capita)                                  | 327             |
| Other leukaemia           | Female | 0-6 days    | 95+ years | Data Rich  | 0         | 3     | Socio-demographic Index                               | 357             |
| Other leukaemia           | Female | 0-6 days    | 95+ years | Global     | 1         | 1     | Log-transformed SEV scalar: Leukemia                  | --              |
| Other leukaemia           | Female | 0-6 days    | 95+ years | Global     | 1         | 1     | Log-transformed age-standardized SEV scalar: Leukemia | --              |
| Other leukaemia           | Female | 0-6 days    | 95+ years | Global     | -1        | 2     | Healthcare access and quality index                   | --              |
| Other leukaemia           | Female | 0-6 days    | 95+ years | Global     | 1         | 2     | Smoking Prevalence                                    | 51              |
| Other leukaemia           | Female | 0-6 days    | 95+ years | Global     | 1         | 2     | Cumulative Cigarettes (10 Years)                      | 97              |
| Other leukaemia           | Female | 0-6 days    | 95+ years | Global     | 1         | 2     | Cumulative Cigarettes (20 Years)                      | 151             |
| Other leukaemia           | Female | 0-6 days    | 95+ years | Global     | 1         | 2     | Cumulative Cigarettes (15 Years)                      | 174             |
| Other leukaemia           | Female | 0-6 days    | 95+ years | Global     | 1         | 2     | Cumulative Cigarettes (5 Years)                       | 458             |
| Other leukaemia           | Female | 0-6 days    | 95+ years | Global     | 1         | 2     | Alcohol (liters per capita)                           | --              |
| Other leukaemia           | Female | 0-6 days    | 95+ years | Global     | 1         | 2     | Mean BMI                                              | --              |
| Other leukaemia           | Female | 0-6 days    | 95+ years | Global     | 1         | 2     | Tobacco (cigarettes per capita)                       | --              |
| Other leukaemia           | Female | 0-6 days    | 95+ years | Global     | -1        | 3     | Education (years per capita)                          | 249             |
| Other leukaemia           | Female | 0-6 days    | 95+ years | Global     | 0         | 3     | LDI (I\$ per capita)                                  | 401             |
| Other leukaemia           | Female | 0-6 days    | 95+ years | Global     | 0         | 3     | Socio-demographic Index                               | 513             |
| Other leukaemia           | Male   | 0-6 days    | 95+ years | Data Rich  | 1         | 1     | Log-transformed age-standardized SEV scalar: Leukemia | 78              |
| Other leukaemia           | Male   | 0-6 days    | 95+ years | Data Rich  | 1         | 1     | Log-transformed SEV scalar: Leukemia                  | 119             |
| Other leukaemia           | Male   | 0-6 days    | 95+ years | Data Rich  | -1        | 2     | Healthcare access and quality index                   | 70              |
| Other leukaemia           | Male   | 0-6 days    | 95+ years | Data Rich  | 1         | 2     | Cumulative Cigarettes (10 Years)                      | 38              |
| Other leukaemia           | Male   | 0-6 days    | 95+ years | Data Rich  | 1         | 2     | Smoking Prevalence                                    | 39              |
| Other leukaemia           | Male   | 0-6 days    | 95+ years | Data Rich  | 1         | 2     | Tobacco (cigarettes per capita)                       | 103             |
| Other leukaemia           | Male   | 0-6 days    | 95+ years | Data Rich  | 1         | 2     | Cumulative Cigarettes (20 Years)                      | 125             |
| Other leukaemia           | Male   | 0-6 days    | 95+ years | Data Rich  | 1         | 2     | Cumulative Cigarettes (15 Years)                      | 182             |
| Other leukaemia           | Male   | 0-6 days    | 95+ years | Data Rich  | 1         | 2     | Cumulative Cigarettes (5 Years)                       | 493             |
| Other leukaemia           | Male   | 0-6 days    | 95+ years | Data Rich  | 1         | 2     | Alcohol (liters per capita)                           | --              |
| Other leukaemia           | Male   | 0-6 days    | 95+ years | Data Rich  | 1         | 2     | Mean BMI                                              | --              |
| Other leukaemia           | Male   | 0-6 days    | 95+ years | Data Rich  | -1        | 3     | Education (years per capita)                          | 96              |
| Other leukaemia           | Male   | 0-6 days    | 95+ years | Data Rich  | 0         | 3     | Socio-demographic Index                               | 382             |
| Other leukaemia           | Male   | 0-6 days    | 95+ years | Data Rich  | 0         | 3     | LDI (I\$ per capita)                                  | 439             |
| Other leukaemia           | Male   | 0-6 days    | 95+ years | Global     | 1         | 1     | Log-transformed SEV scalar: Leukemia                  | 158             |
| Other leukaemia           | Male   | 0-6 days    | 95+ years | Global     | 1         | 1     | Log-transformed age-standardized SEV scalar: Leukemia | 842             |
| Other leukaemia           | Male   | 0-6 days    | 95+ years | Global     | -1        | 2     | Healthcare access and quality index                   | 122             |
| Other leukaemia           | Male   | 0-6 days    | 95+ years | Global     | 1         | 2     | Mean BMI                                              | 38              |
| Other leukaemia           | Male   | 0-6 days    | 95+ years | Global     | 1         | 2     | Cumulative Cigarettes (20 Years)                      | 107             |
| Other leukaemia           | Male   | 0-6 days    | 95+ years | Global     | 1         | 2     | Tobacco (cigarettes per capita)                       | 122             |
| Other leukaemia           | Male   | 0-6 days    | 95+ years | Global     | 1         | 2     | Cumulative Cigarettes (15 Years)                      | 181             |
| Other leukaemia           | Male   | 0-6 days    | 95+ years | Global     | 1         | 2     | Cumulative Cigarettes (10 Years)                      | 361             |

**Appendix Table 9: CODEm covariates used, level of covariate, and expected direction of covariate by cause, sex, and age**

*Covariates that CODEm did not select during the covariate selection process have no draw counts listed.*

| Cause                                                                  | Sex    | Age Start | Age End   | Model Type | Direction | Level | Covariate Name                                        | Number of Draws |
|------------------------------------------------------------------------|--------|-----------|-----------|------------|-----------|-------|-------------------------------------------------------|-----------------|
| Other leukaemia                                                        | Male   | 0-6 days  | 95+ years | Global     | 1         | 2     | Cumulative Cigarettes (5 Years)                       | 452             |
| Other leukaemia                                                        | Male   | 0-6 days  | 95+ years | Global     | 1         | 2     | Alcohol (liters per capita)                           | 510             |
| Other leukaemia                                                        | Male   | 0-6 days  | 95+ years | Global     | 1         | 2     | Smoking Prevalence                                    | --              |
| Other leukaemia                                                        | Male   | 0-6 days  | 95+ years | Global     | -1        | 3     | Education (years per capita)                          | 82              |
| Other leukaemia                                                        | Male   | 0-6 days  | 95+ years | Global     | 0         | 3     | Socio-demographic Index                               | 82              |
| Other leukaemia                                                        | Male   | 0-6 days  | 95+ years | Global     | 0         | 3     | LDI (IS per capita)                                   | 498             |
| Other malignant cancers                                                | Female | 0-6 days  | 95+ years | Data Rich  | 1         | 1     | Tobacco (cigarettes per capita)                       | 764             |
| Other malignant cancers                                                | Female | 0-6 days  | 95+ years | Data Rich  | 1         | 1     | Smoking Prevalence                                    | --              |
| Other malignant cancers                                                | Female | 0-6 days  | 95+ years | Data Rich  | -1        | 2     | vegetables adjusted(g)                                | 111             |
| Other malignant cancers                                                | Female | 0-6 days  | 95+ years | Data Rich  | -1        | 2     | Healthcare access and quality index                   | 352             |
| Other malignant cancers                                                | Female | 0-6 days  | 95+ years | Data Rich  | -1        | 2     | fruits adjusted(g)                                    | --              |
| Other malignant cancers                                                | Female | 0-6 days  | 95+ years | Data Rich  | -1        | 2     | nuts seeds adjusted(g)                                | --              |
| Other malignant cancers                                                | Female | 0-6 days  | 95+ years | Data Rich  | -1        | 2     | pufa adjusted(percent)                                | --              |
| Other malignant cancers                                                | Female | 0-6 days  | 95+ years | Data Rich  | -1        | 3     | Education (years per capita)                          | --              |
| Other malignant cancers                                                | Female | 0-6 days  | 95+ years | Data Rich  | 0         | 3     | LDI (IS per capita)                                   | 328             |
| Other malignant cancers                                                | Female | 0-6 days  | 95+ years | Data Rich  | 0         | 3     | Socio-demographic Index                               | 529             |
| Other malignant cancers                                                | Female | 0-6 days  | 95+ years | Global     | 1         | 1     | Tobacco (cigarettes per capita)                       | 669             |
| Other malignant cancers                                                | Female | 0-6 days  | 95+ years | Global     | 1         | 1     | Smoking Prevalence                                    | --              |
| Other malignant cancers                                                | Female | 0-6 days  | 95+ years | Global     | -1        | 2     | fruits adjusted(g)                                    | 51              |
| Other malignant cancers                                                | Female | 0-6 days  | 95+ years | Global     | -1        | 2     | nuts seeds adjusted(g)                                | 78              |
| Other malignant cancers                                                | Female | 0-6 days  | 95+ years | Global     | -1        | 2     | Healthcare access and quality index                   | 233             |
| Other malignant cancers                                                | Female | 0-6 days  | 95+ years | Global     | -1        | 2     | pufa adjusted(percent)                                | 233             |
| Other malignant cancers                                                | Female | 0-6 days  | 95+ years | Global     | -1        | 2     | vegetables adjusted(g)                                | 233             |
| Other malignant cancers                                                | Female | 0-6 days  | 95+ years | Global     | -1        | 3     | Education (years per capita)                          | 100             |
| Other malignant cancers                                                | Female | 0-6 days  | 95+ years | Global     | 0         | 3     | Socio-demographic Index                               | 580             |
| Other malignant cancers                                                | Female | 0-6 days  | 95+ years | Global     | 0         | 3     | LDI (IS per capita)                                   | 680             |
| Other malignant cancers                                                | Male   | 0-6 days  | 95+ years | Data Rich  | 1         | 1     | Smoking Prevalence                                    | 392             |
| Other malignant cancers                                                | Male   | 0-6 days  | 95+ years | Data Rich  | 1         | 1     | Tobacco (cigarettes per capita)                       | 394             |
| Other malignant cancers                                                | Male   | 0-6 days  | 95+ years | Data Rich  | -1        | 2     | vegetables adjusted(g)                                | 57              |
| Other malignant cancers                                                | Male   | 0-6 days  | 95+ years | Data Rich  | -1        | 2     | nuts seeds adjusted(g)                                | 251             |
| Other malignant cancers                                                | Male   | 0-6 days  | 95+ years | Data Rich  | -1        | 2     | pufa adjusted(percent)                                | 251             |
| Other malignant cancers                                                | Male   | 0-6 days  | 95+ years | Data Rich  | -1        | 2     | Healthcare access and quality index                   | --              |
| Other malignant cancers                                                | Male   | 0-6 days  | 95+ years | Data Rich  | -1        | 2     | fruits adjusted(g)                                    | --              |
| Other malignant cancers                                                | Male   | 0-6 days  | 95+ years | Data Rich  | -1        | 3     | Education (years per capita)                          | 388             |
| Other malignant cancers                                                | Male   | 0-6 days  | 95+ years | Data Rich  | 0         | 3     | LDI (IS per capita)                                   | 341             |
| Other malignant cancers                                                | Male   | 0-6 days  | 95+ years | Data Rich  | 0         | 3     | Socio-demographic Index                               | 580             |
| Other malignant cancers                                                | Male   | 0-6 days  | 95+ years | Global     | 1         | 1     | Tobacco (cigarettes per capita)                       | 745             |
| Other malignant cancers                                                | Male   | 0-6 days  | 95+ years | Global     | 1         | 1     | Smoking Prevalence                                    | --              |
| Other malignant cancers                                                | Male   | 0-6 days  | 95+ years | Global     | -1        | 2     | fruits adjusted(g)                                    | 105             |
| Other malignant cancers                                                | Male   | 0-6 days  | 95+ years | Global     | -1        | 2     | Healthcare access and quality index                   | 333             |
| Other malignant cancers                                                | Male   | 0-6 days  | 95+ years | Global     | -1        | 2     | pufa adjusted(percent)                                | 438             |
| Other malignant cancers                                                | Male   | 0-6 days  | 95+ years | Global     | -1        | 2     | nuts seeds adjusted(g)                                | --              |
| Other malignant cancers                                                | Male   | 0-6 days  | 95+ years | Global     | -1        | 2     | vegetables adjusted(g)                                | --              |
| Other malignant cancers                                                | Male   | 0-6 days  | 95+ years | Global     | -1        | 3     | Education (years per capita)                          | 374             |
| Other malignant cancers                                                | Male   | 0-6 days  | 95+ years | Global     | 0         | 3     | Socio-demographic Index                               | 437             |
| Other malignant cancers                                                | Male   | 0-6 days  | 95+ years | Global     | 0         | 3     | LDI (IS per capita)                                   | 629             |
| Other neoplasms                                                        | Female | 0-6 days  | 95+ years | Data Rich  | -1        | 2     | Healthcare access and quality index                   | --              |
| Other neoplasms                                                        | Female | 0-6 days  | 95+ years | Data Rich  | -1        | 3     | Education (years per capita)                          | --              |
| Other neoplasms                                                        | Female | 0-6 days  | 95+ years | Data Rich  | 0         | 3     | LDI (IS per capita)                                   | 1000            |
| Other neoplasms                                                        | Female | 0-6 days  | 95+ years | Data Rich  | 0         | 3     | Socio-demographic Index                               | 1000            |
| Other neoplasms                                                        | Female | 0-6 days  | 95+ years | Global     | -1        | 2     | Healthcare access and quality index                   | --              |
| Other neoplasms                                                        | Female | 0-6 days  | 95+ years | Global     | -1        | 3     | Education (years per capita)                          | --              |
| Other neoplasms                                                        | Female | 0-6 days  | 95+ years | Global     | 0         | 3     | Socio-demographic Index                               | 546             |
| Other neoplasms                                                        | Female | 0-6 days  | 95+ years | Global     | 0         | 3     | LDI (IS per capita)                                   | 1000            |
| Other neoplasms                                                        | Male   | 0-6 days  | 95+ years | Data Rich  | -1        | 2     | Healthcare access and quality index                   | --              |
| Other neoplasms                                                        | Male   | 0-6 days  | 95+ years | Data Rich  | -1        | 3     | Education (years per capita)                          | --              |
| Other neoplasms                                                        | Male   | 0-6 days  | 95+ years | Data Rich  | 0         | 3     | Socio-demographic Index                               | 591             |
| Other neoplasms                                                        | Male   | 0-6 days  | 95+ years | Data Rich  | 0         | 3     | LDI (IS per capita)                                   | 1000            |
| Other neoplasms                                                        | Male   | 0-6 days  | 95+ years | Global     | -1        | 2     | Healthcare access and quality index                   | --              |
| Other neoplasms                                                        | Male   | 0-6 days  | 95+ years | Global     | -1        | 3     | Education (years per capita)                          | --              |
| Other neoplasms                                                        | Male   | 0-6 days  | 95+ years | Global     | 0         | 3     | LDI (IS per capita)                                   | 1000            |
| Other neoplasms                                                        | Male   | 0-6 days  | 95+ years | Global     | 0         | 3     | Socio-demographic Index                               | 1000            |
| Myelodysplastic, myeloproliferative, and other hematopoietic neoplasms | Female | 0-6 days  | 95+ years | Data Rich  | 1         | 1     | Log-transformed SEV scalar: Leukemia                  | 832             |
| Myelodysplastic, myeloproliferative, and other hematopoietic neoplasms | Female | 0-6 days  | 95+ years | Data Rich  | 1         | 1     | Log-transformed age-standardized SEV scalar: Leukemia | 934             |
| Myelodysplastic, myeloproliferative, and other hematopoietic neoplasms | Female | 0-6 days  | 95+ years | Data Rich  | -1        | 2     | Healthcare access and quality index                   | --              |
| Myelodysplastic, myeloproliferative, and other hematopoietic neoplasms | Female | 0-6 days  | 95+ years | Data Rich  | 1         | 2     | Alcohol (liters per capita)                           | 74              |
| Myelodysplastic, myeloproliferative, and other hematopoietic neoplasms | Female | 0-6 days  | 95+ years | Data Rich  | 1         | 2     | Cumulative Cigarettes (10 Years)                      | 186             |
| Myelodysplastic, myeloproliferative, and other hematopoietic neoplasms | Female | 0-6 days  | 95+ years | Data Rich  | 1         | 2     | Cumulative Cigarettes (5 Years)                       | 231             |
| Myelodysplastic, myeloproliferative, and other hematopoietic neoplasms | Female | 0-6 days  | 95+ years | Data Rich  | 1         | 2     | Cumulative Cigarettes (15 Years)                      | --              |
| Myelodysplastic, myeloproliferative, and other hematopoietic neoplasms | Female | 0-6 days  | 95+ years | Data Rich  | 1         | 2     | Cumulative Cigarettes (20 Years)                      | --              |
| Myelodysplastic, myeloproliferative, and other hematopoietic neoplasms | Female | 0-6 days  | 95+ years | Data Rich  | 1         | 2     | Smoking Prevalence                                    | --              |
| Myelodysplastic, myeloproliferative, and other hematopoietic neoplasms | Female | 0-6 days  | 95+ years | Data Rich  | 1         | 2     | Tobacco (cigarettes per capita)                       | --              |

**Appendix Table 9: CODEm covariates used, level of covariate, and expected direction of covariate by cause, sex, and age**

*Covariates that CODEm did not select during the covariate selection process have no draw counts listed.*

| Cause                                                                  | Sex    | Age Start | Age End   | Model Type | Direction | Level | Covariate Name                                        | Number of Draws |
|------------------------------------------------------------------------|--------|-----------|-----------|------------|-----------|-------|-------------------------------------------------------|-----------------|
| Myelodysplastic, myeloproliferative, and other hematopoietic neoplasms | Female | 0-6 days  | 95+ years | Data Rich  | -1        | 3     | Education (years per capita)                          | --              |
| Myelodysplastic, myeloproliferative, and other hematopoietic neoplasms | Female | 0-6 days  | 95+ years | Data Rich  | 0         | 3     | Socio-demographic Index                               | 449             |
| Myelodysplastic, myeloproliferative, and other hematopoietic neoplasms | Female | 0-6 days  | 95+ years | Data Rich  | 0         | 3     | LDI (I\$ per capita)                                  | --              |
| Myelodysplastic, myeloproliferative, and other hematopoietic neoplasms | Female | 0-6 days  | 95+ years | Global     | 1         | 1     | Log-transformed SEV scalar: Leukemia                  | 395             |
| Myelodysplastic, myeloproliferative, and other hematopoietic neoplasms | Female | 0-6 days  | 95+ years | Global     | 1         | 1     | Log-transformed age-standardized SEV scalar: Leukemia | 822             |
| Myelodysplastic, myeloproliferative, and other hematopoietic neoplasms | Female | 0-6 days  | 95+ years | Global     | -1        | 2     | Healthcare access and quality index                   | --              |
| Myelodysplastic, myeloproliferative, and other hematopoietic neoplasms | Female | 0-6 days  | 95+ years | Global     | 1         | 2     | Cumulative Cigarettes (5 Years)                       | 3               |
| Myelodysplastic, myeloproliferative, and other hematopoietic neoplasms | Female | 0-6 days  | 95+ years | Global     | 1         | 2     | Cumulative Cigarettes (10 Years)                      | 19              |
| Myelodysplastic, myeloproliferative, and other hematopoietic neoplasms | Female | 0-6 days  | 95+ years | Global     | 1         | 2     | Cumulative Cigarettes (15 Years)                      | 33              |
| Myelodysplastic, myeloproliferative, and other hematopoietic neoplasms | Female | 0-6 days  | 95+ years | Global     | 1         | 2     | Cumulative Cigarettes (20 Years)                      | 92              |
| Myelodysplastic, myeloproliferative, and other hematopoietic neoplasms | Female | 0-6 days  | 95+ years | Global     | 1         | 2     | Smoking Prevalence                                    | 139             |
| Myelodysplastic, myeloproliferative, and other hematopoietic neoplasms | Female | 0-6 days  | 95+ years | Global     | 1         | 2     | Alcohol (liters per capita)                           | 195             |
| Myelodysplastic, myeloproliferative, and other hematopoietic neoplasms | Female | 0-6 days  | 95+ years | Global     | 1         | 2     | Tobacco (cigarettes per capita)                       | --              |
| Myelodysplastic, myeloproliferative, and other hematopoietic neoplasms | Female | 0-6 days  | 95+ years | Global     | -1        | 3     | Education (years per capita)                          | --              |
| Myelodysplastic, myeloproliferative, and other hematopoietic neoplasms | Female | 0-6 days  | 95+ years | Global     | 0         | 3     | Socio-demographic Index                               | 186             |
| Myelodysplastic, myeloproliferative, and other hematopoietic neoplasms | Female | 0-6 days  | 95+ years | Global     | 0         | 3     | LDI (I\$ per capita)                                  | --              |
| Myelodysplastic, myeloproliferative, and other hematopoietic neoplasms | Male   | 0-6 days  | 95+ years | Data Rich  | 1         | 1     | Log-transformed age-standardized SEV scalar: Leukemia | 374             |
| Myelodysplastic, myeloproliferative, and other hematopoietic neoplasms | Male   | 0-6 days  | 95+ years | Data Rich  | 1         | 1     | Log-transformed SEV scalar: Leukemia                  | 516             |
| Myelodysplastic, myeloproliferative, and other hematopoietic neoplasms | Male   | 0-6 days  | 95+ years | Data Rich  | -1        | 2     | Healthcare access and quality index                   | --              |
| Myelodysplastic, myeloproliferative, and other hematopoietic neoplasms | Male   | 0-6 days  | 95+ years | Data Rich  | 1         | 2     | Cumulative Cigarettes (20 Years)                      | 88              |
| Myelodysplastic, myeloproliferative, and other hematopoietic neoplasms | Male   | 0-6 days  | 95+ years | Data Rich  | 1         | 2     | Cumulative Cigarettes (15 Years)                      | 107             |
| Myelodysplastic, myeloproliferative, and other hematopoietic neoplasms | Male   | 0-6 days  | 95+ years | Data Rich  | 1         | 2     | Cumulative Cigarettes (10 Years)                      | 128             |
| Myelodysplastic, myeloproliferative, and other hematopoietic neoplasms | Male   | 0-6 days  | 95+ years | Data Rich  | 1         | 2     | Alcohol (liters per capita)                           | --              |
| Myelodysplastic, myeloproliferative, and other hematopoietic neoplasms | Male   | 0-6 days  | 95+ years | Data Rich  | 1         | 2     | Cumulative Cigarettes (5 Years)                       | --              |
| Myelodysplastic, myeloproliferative, and other hematopoietic neoplasms | Male   | 0-6 days  | 95+ years | Data Rich  | 1         | 2     | Smoking Prevalence                                    | --              |
| Myelodysplastic, myeloproliferative, and other hematopoietic neoplasms | Male   | 0-6 days  | 95+ years | Data Rich  | 1         | 2     | Tobacco (cigarettes per capita)                       | --              |
| Myelodysplastic, myeloproliferative, and other hematopoietic neoplasms | Male   | 0-6 days  | 95+ years | Data Rich  | -1        | 3     | Education (years per capita)                          | --              |
| Myelodysplastic, myeloproliferative, and other hematopoietic neoplasms | Male   | 0-6 days  | 95+ years | Data Rich  | 0         | 3     | Socio-demographic Index                               | 228             |
| Myelodysplastic, myeloproliferative, and other hematopoietic neoplasms | Male   | 0-6 days  | 95+ years | Data Rich  | 0         | 3     | LDI (I\$ per capita)                                  | --              |
| Myelodysplastic, myeloproliferative, and other hematopoietic neoplasms | Male   | 0-6 days  | 95+ years | Global     | 1         | 1     | Log-transformed SEV scalar: Leukemia                  | 491             |
| Myelodysplastic, myeloproliferative, and other hematopoietic neoplasms | Male   | 0-6 days  | 95+ years | Global     | 1         | 1     | Log-transformed age-standardized SEV scalar: Leukemia | 509             |
| Myelodysplastic, myeloproliferative, and other hematopoietic neoplasms | Male   | 0-6 days  | 95+ years | Global     | -1        | 2     | Healthcare access and quality index                   | --              |
| Myelodysplastic, myeloproliferative, and other hematopoietic neoplasms | Male   | 0-6 days  | 95+ years | Global     | 1         | 2     | Alcohol (liters per capita)                           | --              |
| Myelodysplastic, myeloproliferative, and other hematopoietic neoplasms | Male   | 0-6 days  | 95+ years | Global     | 1         | 2     | Cumulative Cigarettes (10 Years)                      | --              |
| Myelodysplastic, myeloproliferative, and other hematopoietic neoplasms | Male   | 0-6 days  | 95+ years | Global     | 1         | 2     | Cumulative Cigarettes (15 Years)                      | --              |
| Myelodysplastic, myeloproliferative, and other hematopoietic neoplasms | Male   | 0-6 days  | 95+ years | Global     | 1         | 2     | Cumulative Cigarettes (20 Years)                      | --              |
| Myelodysplastic, myeloproliferative, and other hematopoietic neoplasms | Male   | 0-6 days  | 95+ years | Global     | 1         | 2     | Cumulative Cigarettes (5 Years)                       | --              |
| Myelodysplastic, myeloproliferative, and other hematopoietic neoplasms | Male   | 0-6 days  | 95+ years | Global     | 1         | 2     | Smoking Prevalence                                    | --              |
| Myelodysplastic, myeloproliferative, and other hematopoietic neoplasms | Male   | 0-6 days  | 95+ years | Global     | 1         | 2     | Tobacco (cigarettes per capita)                       | --              |
| Myelodysplastic, myeloproliferative, and other hematopoietic neoplasms | Male   | 0-6 days  | 95+ years | Global     | -1        | 3     | Education (years per capita)                          | --              |
| Myelodysplastic, myeloproliferative, and other hematopoietic neoplasms | Male   | 0-6 days  | 95+ years | Global     | 0         | 3     | LDI (I\$ per capita)                                  | --              |
| Myelodysplastic, myeloproliferative, and other hematopoietic neoplasms | Male   | 0-6 days  | 95+ years | Global     | 0         | 3     | Socio-demographic Index                               | --              |
| Other benign and in situ neoplasms                                     | Female | 0-6 days  | 95+ years | Data Rich  | -1        | 2     | Healthcare access and quality index                   | --              |
| Other benign and in situ neoplasms                                     | Female | 0-6 days  | 95+ years | Data Rich  | -1        | 3     | Education (years per capita)                          | --              |
| Other benign and in situ neoplasms                                     | Female | 0-6 days  | 95+ years | Data Rich  | 0         | 3     | LDI (I\$ per capita)                                  | 1000            |
| Other benign and in situ neoplasms                                     | Female | 0-6 days  | 95+ years | Data Rich  | 0         | 3     | Socio-demographic Index                               | 1000            |
| Other benign and in situ neoplasms                                     | Female | 0-6 days  | 95+ years | Global     | -1        | 2     | Healthcare access and quality index                   | 546             |
| Other benign and in situ neoplasms                                     | Female | 0-6 days  | 95+ years | Global     | -1        | 3     | Education (years per capita)                          | --              |
| Other benign and in situ neoplasms                                     | Female | 0-6 days  | 95+ years | Global     | 0         | 3     | LDI (I\$ per capita)                                  | 454             |
| Other benign and in situ neoplasms                                     | Female | 0-6 days  | 95+ years | Global     | 0         | 3     | Socio-demographic Index                               | 454             |
| Other benign and in situ neoplasms                                     | Male   | 0-6 days  | 95+ years | Data Rich  | -1        | 2     | Healthcare access and quality index                   | --              |
| Other benign and in situ neoplasms                                     | Male   | 0-6 days  | 95+ years | Data Rich  | -1        | 3     | Education (years per capita)                          | --              |
| Other benign and in situ neoplasms                                     | Male   | 0-6 days  | 95+ years | Data Rich  | 0         | 3     | Socio-demographic Index                               | 546             |
| Other benign and in situ neoplasms                                     | Male   | 0-6 days  | 95+ years | Data Rich  | 0         | 3     | LDI (I\$ per capita)                                  | 1000            |
| Other benign and in situ neoplasms                                     | Male   | 0-6 days  | 95+ years | Global     | -1        | 2     | Healthcare access and quality index                   | --              |
| Other benign and in situ neoplasms                                     | Male   | 0-6 days  | 95+ years | Global     | -1        | 3     | Education (years per capita)                          | --              |
| Other benign and in situ neoplasms                                     | Male   | 0-6 days  | 95+ years | Global     | 0         | 3     | LDI (I\$ per capita)                                  | 1000            |



**Appendix Table 9: CODEm covariates used, level of covariate, and expected direction of covariate by cause, sex, and age**

*Covariates that CODEm did not select during the covariate selection process have no draw counts listed.*

| Cause                              | Sex    | Age Start | Age End   | Model Type | Direction | Level | Covariate Name                           | Number of Draws |
|------------------------------------|--------|-----------|-----------|------------|-----------|-------|------------------------------------------|-----------------|
| Other benign and in situ neoplasms | Male   | 0-6 days  | 95+ years | Global     | 0         | 3     | Socio-demographic Index                  | 1000            |
| Cardiovascular diseases            | Female | 0-6 days  | 95+ years | Data Rich  | 1         | 1     | Cholesterol (total, mean per capita)     | 195             |
| Cardiovascular diseases            | Female | 0-6 days  | 95+ years | Data Rich  | 1         | 1     | Systolic Blood Pressure (mmHg)           | 681             |
| Cardiovascular diseases            | Female | 0-6 days  | 95+ years | Data Rich  | 1         | 1     | Smoking Prevalence                       | 997             |
| Cardiovascular diseases            | Female | 0-6 days  | 95+ years | Data Rich  | 1         | 1     | Log-transformed SEV scalar: CVD          | 1000            |
| Cardiovascular diseases            | Female | 0-6 days  | 95+ years | Data Rich  | -1        | 2     | Healthcare access and quality index      | 0               |
| Cardiovascular diseases            | Female | 0-6 days  | 95+ years | Data Rich  | -1        | 2     | Elevation Over 1500m (proportion)        | 256             |
| Cardiovascular diseases            | Female | 0-6 days  | 95+ years | Data Rich  | 1         | 2     | Indoor Air Pollution (All Cooking Fuels) | 26              |
| Cardiovascular diseases            | Female | 0-6 days  | 95+ years | Data Rich  | 1         | 2     | Outdoor Air Pollution (PM2.5)            | 283             |
| Cardiovascular diseases            | Female | 0-6 days  | 95+ years | Data Rich  | 1         | 2     | Diabetes Fasting Plasma Glucose (mmol/L) | --              |
| Cardiovascular diseases            | Female | 0-6 days  | 95+ years | Data Rich  | 1         | 2     | Mean BMI                                 | --              |
| Cardiovascular diseases            | Female | 0-6 days  | 95+ years | Data Rich  | -1        | 3     | pulses legumes adjusted(g)               | 0               |
| Cardiovascular diseases            | Female | 0-6 days  | 95+ years | Data Rich  | -1        | 3     | LDI (I\$ per capita)                     | 71              |
| Cardiovascular diseases            | Female | 0-6 days  | 95+ years | Data Rich  | -1        | 3     | nuts seeds adjusted(g)                   | 144             |
| Cardiovascular diseases            | Female | 0-6 days  | 95+ years | Data Rich  | -1        | 3     | fruits adjusted(g)                       | 172             |
| Cardiovascular diseases            | Female | 0-6 days  | 95+ years | Data Rich  | -1        | 3     | pufa adjusted(percent)                   | 211             |
| Cardiovascular diseases            | Female | 0-6 days  | 95+ years | Data Rich  | -1        | 3     | omega 3 adjusted(g)                      | --              |
| Cardiovascular diseases            | Female | 0-6 days  | 95+ years | Data Rich  | -1        | 3     | vegetables adjusted(g)                   | --              |
| Cardiovascular diseases            | Female | 0-6 days  | 95+ years | Data Rich  | 0         | 3     | Socio-demographic Index                  | 0               |
| Cardiovascular diseases            | Female | 0-6 days  | 95+ years | Data Rich  | 0         | 3     | Alcohol (liters per capita)              | 168             |
| Cardiovascular diseases            | Female | 0-6 days  | 95+ years | Data Rich  | 1         | 3     | Diet high in trans fatty acids           | 15              |
| Cardiovascular diseases            | Female | 0-6 days  | 95+ years | Global     | 1         | 1     | Systolic Blood Pressure (mmHg)           | 45              |
| Cardiovascular diseases            | Female | 0-6 days  | 95+ years | Global     | 1         | 1     | Cholesterol (total, mean per capita)     | 139             |
| Cardiovascular diseases            | Female | 0-6 days  | 95+ years | Global     | 1         | 1     | Smoking Prevalence                       | 652             |
| Cardiovascular diseases            | Female | 0-6 days  | 95+ years | Global     | 1         | 1     | Log-transformed SEV scalar: CVD          | 1000            |
| Cardiovascular diseases            | Female | 0-6 days  | 95+ years | Global     | -1        | 2     | Elevation Over 1500m (proportion)        | 0               |
| Cardiovascular diseases            | Female | 0-6 days  | 95+ years | Global     | -1        | 2     | Healthcare access and quality index      | 798             |
| Cardiovascular diseases            | Female | 0-6 days  | 95+ years | Global     | 1         | 2     | Outdoor Air Pollution (PM2.5)            | 25              |
| Cardiovascular diseases            | Female | 0-6 days  | 95+ years | Global     | 1         | 2     | Indoor Air Pollution (All Cooking Fuels) | 47              |
| Cardiovascular diseases            | Female | 0-6 days  | 95+ years | Global     | 1         | 2     | Diabetes Fasting Plasma Glucose (mmol/L) | --              |
| Cardiovascular diseases            | Female | 0-6 days  | 95+ years | Global     | 1         | 2     | Mean BMI                                 | --              |
| Cardiovascular diseases            | Female | 0-6 days  | 95+ years | Global     | -1        | 3     | fruits adjusted(g)                       | 0               |
| Cardiovascular diseases            | Female | 0-6 days  | 95+ years | Global     | -1        | 3     | pulses legumes adjusted(g)               | 0               |
| Cardiovascular diseases            | Female | 0-6 days  | 95+ years | Global     | -1        | 3     | nuts seeds adjusted(g)                   | 140             |
| Cardiovascular diseases            | Female | 0-6 days  | 95+ years | Global     | -1        | 3     | LDI (I\$ per capita)                     | 288             |
| Cardiovascular diseases            | Female | 0-6 days  | 95+ years | Global     | -1        | 3     | pufa adjusted(percent)                   | 360             |
| Cardiovascular diseases            | Female | 0-6 days  | 95+ years | Global     | -1        | 3     | omega 3 adjusted(g)                      | --              |
| Cardiovascular diseases            | Female | 0-6 days  | 95+ years | Global     | -1        | 3     | vegetables adjusted(g)                   | --              |
| Cardiovascular diseases            | Female | 0-6 days  | 95+ years | Global     | 0         | 3     | Socio-demographic Index                  | 326             |
| Cardiovascular diseases            | Female | 0-6 days  | 95+ years | Global     | 0         | 3     | Alcohol (liters per capita)              | 476             |
| Cardiovascular diseases            | Female | 0-6 days  | 95+ years | Global     | 1         | 3     | Diet high in trans fatty acids           | 515             |
| Cardiovascular diseases            | Male   | 0-6 days  | 95+ years | Data Rich  | 1         | 1     | Cholesterol (total, mean per capita)     | 265             |
| Cardiovascular diseases            | Male   | 0-6 days  | 95+ years | Data Rich  | 1         | 1     | Systolic Blood Pressure (mmHg)           | 265             |
| Cardiovascular diseases            | Male   | 0-6 days  | 95+ years | Data Rich  | 1         | 1     | Log-transformed SEV scalar: CVD          | 1000            |
| Cardiovascular diseases            | Male   | 0-6 days  | 95+ years | Data Rich  | 1         | 1     | Smoking Prevalence                       | 1000            |
| Cardiovascular diseases            | Male   | 0-6 days  | 95+ years | Data Rich  | -1        | 2     | Healthcare access and quality index      | 116             |
| Cardiovascular diseases            | Male   | 0-6 days  | 95+ years | Data Rich  | -1        | 2     | Elevation Over 1500m (proportion)        | 121             |
| Cardiovascular diseases            | Male   | 0-6 days  | 95+ years | Data Rich  | 1         | 2     | Indoor Air Pollution (All Cooking Fuels) | 84              |
| Cardiovascular diseases            | Male   | 0-6 days  | 95+ years | Data Rich  | 1         | 2     | Outdoor Air Pollution (PM2.5)            | 121             |
| Cardiovascular diseases            | Male   | 0-6 days  | 95+ years | Data Rich  | 1         | 2     | Diabetes Fasting Plasma Glucose (mmol/L) | --              |
| Cardiovascular diseases            | Male   | 0-6 days  | 95+ years | Data Rich  | 1         | 2     | Mean BMI                                 | --              |
| Cardiovascular diseases            | Male   | 0-6 days  | 95+ years | Data Rich  | -1        | 3     | fruits adjusted(g)                       | 0               |
| Cardiovascular diseases            | Male   | 0-6 days  | 95+ years | Data Rich  | -1        | 3     | LDI (I\$ per capita)                     | 39              |
| Cardiovascular diseases            | Male   | 0-6 days  | 95+ years | Data Rich  | -1        | 3     | nuts seeds adjusted(g)                   | 113             |
| Cardiovascular diseases            | Male   | 0-6 days  | 95+ years | Data Rich  | -1        | 3     | pufa adjusted(percent)                   | 454             |
| Cardiovascular diseases            | Male   | 0-6 days  | 95+ years | Data Rich  | -1        | 3     | pulses legumes adjusted(g)               | 516             |
| Cardiovascular diseases            | Male   | 0-6 days  | 95+ years | Data Rich  | -1        | 3     | omega 3 adjusted(g)                      | --              |
| Cardiovascular diseases            | Male   | 0-6 days  | 95+ years | Data Rich  | -1        | 3     | vegetables adjusted(g)                   | --              |
| Cardiovascular diseases            | Male   | 0-6 days  | 95+ years | Data Rich  | 0         | 3     | Socio-demographic Index                  | 45              |
| Cardiovascular diseases            | Male   | 0-6 days  | 95+ years | Data Rich  | 0         | 3     | Alcohol (liters per capita)              | 511             |
| Cardiovascular diseases            | Male   | 0-6 days  | 95+ years | Data Rich  | 1         | 3     | Diet high in trans fatty acids           | 0               |
| Cardiovascular diseases            | Male   | 0-6 days  | 95+ years | Global     | 1         | 1     | Systolic Blood Pressure (mmHg)           | 19              |
| Cardiovascular diseases            | Male   | 0-6 days  | 95+ years | Global     | 1         | 1     | Cholesterol (total, mean per capita)     | 626             |
| Cardiovascular diseases            | Male   | 0-6 days  | 95+ years | Global     | 1         | 1     | Smoking Prevalence                       | 979             |
| Cardiovascular diseases            | Male   | 0-6 days  | 95+ years | Global     | 1         | 1     | Log-transformed SEV scalar: CVD          | 1000            |
| Cardiovascular diseases            | Male   | 0-6 days  | 95+ years | Global     | -1        | 2     | Elevation Over 1500m (proportion)        | 285             |
| Cardiovascular diseases            | Male   | 0-6 days  | 95+ years | Global     | -1        | 2     | Healthcare access and quality index      | 411             |
| Cardiovascular diseases            | Male   | 0-6 days  | 95+ years | Global     | 1         | 2     | Indoor Air Pollution (All Cooking Fuels) | 264             |
| Cardiovascular diseases            | Male   | 0-6 days  | 95+ years | Global     | 1         | 2     | Diabetes Fasting Plasma Glucose (mmol/L) | 285             |
| Cardiovascular diseases            | Male   | 0-6 days  | 95+ years | Global     | 1         | 2     | Outdoor Air Pollution (PM2.5)            | 285             |
| Cardiovascular diseases            | Male   | 0-6 days  | 95+ years | Global     | 1         | 2     | Mean BMI                                 | --              |
| Cardiovascular diseases            | Male   | 0-6 days  | 95+ years | Global     | -1        | 3     | fruits adjusted(g)                       | 0               |
| Cardiovascular diseases            | Male   | 0-6 days  | 95+ years | Global     | -1        | 3     | LDI (I\$ per capita)                     | 216             |
| Cardiovascular diseases            | Male   | 0-6 days  | 95+ years | Global     | -1        | 3     | pufa adjusted(percent)                   | 408             |
| Cardiovascular diseases            | Male   | 0-6 days  | 95+ years | Global     | -1        | 3     | nuts seeds adjusted(g)                   | 494             |
| Cardiovascular diseases            | Male   | 0-6 days  | 95+ years | Global     | -1        | 3     | pulses legumes adjusted(g)               | 950             |
| Cardiovascular diseases            | Male   | 0-6 days  | 95+ years | Global     | -1        | 3     | omega 3 adjusted(g)                      | --              |
| Cardiovascular diseases            | Male   | 0-6 days  | 95+ years | Global     | -1        | 3     | vegetables adjusted(g)                   | --              |

**Appendix Table 9: CODEm covariates used, level of covariate, and expected direction of covariate by cause, sex, and age**

*Covariates that CODEm did not select during the covariate selection process have no draw counts listed.*

| Cause                   | Sex    | Age Start   | Age End   | Model Type | Direction | Level | Covariate Name                                         | Number of Draws |
|-------------------------|--------|-------------|-----------|------------|-----------|-------|--------------------------------------------------------|-----------------|
| Cardiovascular diseases | Male   | 0-6 days    | 95+ years | Global     | 0         | 3     | Socio-demographic Index                                | 351             |
| Cardiovascular diseases | Male   | 0-6 days    | 95+ years | Global     | 0         | 3     | Alcohol (liters per capita)                            | 923             |
| Cardiovascular diseases | Male   | 0-6 days    | 95+ years | Global     | 1         | 3     | Diet high in trans fatty acids                         | 0               |
| Rheumatic heart disease | Female | 1-4 years   | 95+ years | Data Rich  | -1        | 1     | Improved Water Source (proportion with access)         | 165             |
| Rheumatic heart disease | Female | 1-4 years   | 95+ years | Data Rich  | -1        | 1     | Sanitation (proportion with access)                    | 606             |
| Rheumatic heart disease | Female | 1-4 years   | 95+ years | Data Rich  | 1         | 1     | Underweight (proportion <2SD weight for age, <5 years) | 281             |
| Rheumatic heart disease | Female | 1-4 years   | 95+ years | Data Rich  | 1         | 1     | Log-transformed SEV scalar: RHD                        | 860             |
| Rheumatic heart disease | Female | 1-4 years   | 95+ years | Data Rich  | -1        | 2     | Healthcare access and quality index                    | 199             |
| Rheumatic heart disease | Female | 1-4 years   | 95+ years | Data Rich  | -1        | 3     | Socio-demographic Index                                | 424             |
| Rheumatic heart disease | Female | 1-4 years   | 95+ years | Data Rich  | -1        | 3     | Education (years per capita)                           | 782             |
| Rheumatic heart disease | Female | 1-4 years   | 95+ years | Data Rich  | -1        | 3     | LDI (I\$ per capita)                                   | --              |
| Rheumatic heart disease | Female | 1-4 years   | 95+ years | Global     | -1        | 1     | Improved Water Source (proportion with access)         | 162             |
| Rheumatic heart disease | Female | 1-4 years   | 95+ years | Global     | -1        | 1     | Sanitation (proportion with access)                    | 395             |
| Rheumatic heart disease | Female | 1-4 years   | 95+ years | Global     | 1         | 1     | Underweight (proportion <2SD weight for age, <5 years) | 221             |
| Rheumatic heart disease | Female | 1-4 years   | 95+ years | Global     | 1         | 1     | Log-transformed SEV scalar: RHD                        | 880             |
| Rheumatic heart disease | Female | 1-4 years   | 95+ years | Global     | -1        | 2     | Healthcare access and quality index                    | 282             |
| Rheumatic heart disease | Female | 1-4 years   | 95+ years | Global     | -1        | 3     | Socio-demographic Index                                | 333             |
| Rheumatic heart disease | Female | 1-4 years   | 95+ years | Global     | -1        | 3     | Education (years per capita)                           | 756             |
| Rheumatic heart disease | Female | 1-4 years   | 95+ years | Global     | -1        | 3     | LDI (I\$ per capita)                                   | --              |
| Rheumatic heart disease | Male   | 1-4 years   | 95+ years | Data Rich  | -1        | 1     | Improved Water Source (proportion with access)         | 39              |
| Rheumatic heart disease | Male   | 1-4 years   | 95+ years | Data Rich  | -1        | 1     | Sanitation (proportion with access)                    | 772             |
| Rheumatic heart disease | Male   | 1-4 years   | 95+ years | Data Rich  | 1         | 1     | Underweight (proportion <2SD weight for age, <5 years) | 478             |
| Rheumatic heart disease | Male   | 1-4 years   | 95+ years | Data Rich  | 1         | 1     | Log-transformed SEV scalar: RHD                        | 690             |
| Rheumatic heart disease | Male   | 1-4 years   | 95+ years | Data Rich  | -1        | 2     | Healthcare access and quality index                    | 555             |
| Rheumatic heart disease | Male   | 1-4 years   | 95+ years | Data Rich  | -1        | 3     | Education (years per capita)                           | 336             |
| Rheumatic heart disease | Male   | 1-4 years   | 95+ years | Data Rich  | -1        | 3     | Socio-demographic Index                                | 363             |
| Rheumatic heart disease | Male   | 1-4 years   | 95+ years | Data Rich  | -1        | 3     | LDI (I\$ per capita)                                   | --              |
| Rheumatic heart disease | Male   | 1-4 years   | 95+ years | Global     | -1        | 1     | Improved Water Source (proportion with access)         | 23              |
| Rheumatic heart disease | Male   | 1-4 years   | 95+ years | Global     | -1        | 1     | Sanitation (proportion with access)                    | 546             |
| Rheumatic heart disease | Male   | 1-4 years   | 95+ years | Global     | 1         | 1     | Underweight (proportion <2SD weight for age, <5 years) | 377             |
| Rheumatic heart disease | Male   | 1-4 years   | 95+ years | Global     | 1         | 1     | Log-transformed SEV scalar: RHD                        | 746             |
| Rheumatic heart disease | Male   | 1-4 years   | 95+ years | Global     | -1        | 2     | Healthcare access and quality index                    | 681             |
| Rheumatic heart disease | Male   | 1-4 years   | 95+ years | Global     | -1        | 3     | Socio-demographic Index                                | 136             |
| Rheumatic heart disease | Male   | 1-4 years   | 95+ years | Global     | -1        | 3     | Education (years per capita)                           | 281             |
| Rheumatic heart disease | Male   | 1-4 years   | 95+ years | Global     | -1        | 3     | LDI (I\$ per capita)                                   | --              |
| Ischaemic heart disease | Female | 15-19 years | 95+ years | Data Rich  | 1         | 1     | Cholesterol (total, mean per capita)                   | 628             |
| Ischaemic heart disease | Female | 15-19 years | 95+ years | Data Rich  | 1         | 1     | Systolic Blood Pressure (mmHg)                         | 723             |
| Ischaemic heart disease | Female | 15-19 years | 95+ years | Data Rich  | 1         | 1     | Smoking Prevalence                                     | 972             |
| Ischaemic heart disease | Female | 15-19 years | 95+ years | Data Rich  | 1         | 1     | Log-transformed SEV scalar: IHD                        | 1000            |
| Ischaemic heart disease | Female | 15-19 years | 95+ years | Data Rich  | -1        | 2     | Healthcare access and quality index                    | 460             |
| Ischaemic heart disease | Female | 15-19 years | 95+ years | Data Rich  | -1        | 2     | Elevation Over 1500m (proportion)                      | 624             |
| Ischaemic heart disease | Female | 15-19 years | 95+ years | Data Rich  | 1         | 2     | Indoor Air Pollution (All Cooking Fuels)               | 374             |
| Ischaemic heart disease | Female | 15-19 years | 95+ years | Data Rich  | 1         | 2     | Outdoor Air Pollution (PM2.5)                          | 648             |
| Ischaemic heart disease | Female | 15-19 years | 95+ years | Data Rich  | 1         | 2     | Diabetes Fasting Plasma Glucose (mmol/L)               | --              |
| Ischaemic heart disease | Female | 15-19 years | 95+ years | Data Rich  | 1         | 2     | Mean BMI                                               | --              |
| Ischaemic heart disease | Female | 15-19 years | 95+ years | Data Rich  | -1        | 3     | nuts seeds adjusted(g)                                 | 12              |
| Ischaemic heart disease | Female | 15-19 years | 95+ years | Data Rich  | -1        | 3     | fruits adjusted(g)                                     | 13              |
| Ischaemic heart disease | Female | 15-19 years | 95+ years | Data Rich  | -1        | 3     | pufa adjusted(percent)                                 | 14              |
| Ischaemic heart disease | Female | 15-19 years | 95+ years | Data Rich  | -1        | 3     | pulses legumes adjusted(g)                             | 527             |
| Ischaemic heart disease | Female | 15-19 years | 95+ years | Data Rich  | -1        | 3     | LDI (I\$ per capita)                                   | --              |
| Ischaemic heart disease | Female | 15-19 years | 95+ years | Data Rich  | -1        | 3     | omega 3 adjusted(g)                                    | --              |
| Ischaemic heart disease | Female | 15-19 years | 95+ years | Data Rich  | -1        | 3     | vegetables adjusted(g)                                 | --              |
| Ischaemic heart disease | Female | 15-19 years | 95+ years | Data Rich  | 0         | 3     | Socio-demographic Index                                | 370             |
| Ischaemic heart disease | Female | 15-19 years | 95+ years | Data Rich  | 0         | 3     | Alcohol (liters per capita)                            | 711             |
| Ischaemic heart disease | Female | 15-19 years | 95+ years | Data Rich  | 1         | 3     | Diet high in trans fatty acids                         | 371             |
| Ischaemic heart disease | Female | 15-19 years | 95+ years | Global     | 1         | 1     | Cholesterol (total, mean per capita)                   | 551             |
| Ischaemic heart disease | Female | 15-19 years | 95+ years | Global     | 1         | 1     | Smoking Prevalence                                     | 735             |
| Ischaemic heart disease | Female | 15-19 years | 95+ years | Global     | 1         | 1     | Systolic Blood Pressure (mmHg)                         | 924             |
| Ischaemic heart disease | Female | 15-19 years | 95+ years | Global     | 1         | 1     | Log-transformed SEV scalar: IHD                        | 961             |
| Ischaemic heart disease | Female | 15-19 years | 95+ years | Global     | -1        | 2     | Healthcare access and quality index                    | 71              |
| Ischaemic heart disease | Female | 15-19 years | 95+ years | Global     | -1        | 2     | Elevation Over 1500m (proportion)                      | 424             |
| Ischaemic heart disease | Female | 15-19 years | 95+ years | Global     | 1         | 2     | Indoor Air Pollution (All Cooking Fuels)               | 0               |
| Ischaemic heart disease | Female | 15-19 years | 95+ years | Global     | 1         | 2     | Outdoor Air Pollution (PM2.5)                          | 210             |
| Ischaemic heart disease | Female | 15-19 years | 95+ years | Global     | 1         | 2     | Diabetes Fasting Plasma Glucose (mmol/L)               | 281             |
| Ischaemic heart disease | Female | 15-19 years | 95+ years | Global     | 1         | 2     | Mean BMI                                               | --              |
| Ischaemic heart disease | Female | 15-19 years | 95+ years | Global     | -1        | 3     | fruits adjusted(g)                                     | 0               |
| Ischaemic heart disease | Female | 15-19 years | 95+ years | Global     | -1        | 3     | nuts seeds adjusted(g)                                 | 24              |
| Ischaemic heart disease | Female | 15-19 years | 95+ years | Global     | -1        | 3     | pufa adjusted(percent)                                 | 32              |
| Ischaemic heart disease | Female | 15-19 years | 95+ years | Global     | -1        | 3     | pulses legumes adjusted(g)                             | 422             |
| Ischaemic heart disease | Female | 15-19 years | 95+ years | Global     | -1        | 3     | LDI (I\$ per capita)                                   | --              |
| Ischaemic heart disease | Female | 15-19 years | 95+ years | Global     | -1        | 3     | omega 3 adjusted(g)                                    | --              |
| Ischaemic heart disease | Female | 15-19 years | 95+ years | Global     | -1        | 3     | vegetables adjusted(g)                                 | --              |
| Ischaemic heart disease | Female | 15-19 years | 95+ years | Global     | 0         | 3     | Alcohol (liters per capita)                            | 182             |
| Ischaemic heart disease | Female | 15-19 years | 95+ years | Global     | 0         | 3     | Socio-demographic Index                                | 275             |
| Ischaemic heart disease | Female | 15-19 years | 95+ years | Global     | 1         | 3     | Diet high in trans fatty acids                         | 168             |
| Ischaemic heart disease | Male   | 15-19 years | 95+ years | Data Rich  | 1         | 1     | Systolic Blood Pressure (mmHg)                         | 81              |
| Ischaemic heart disease | Male   | 15-19 years | 95+ years | Data Rich  | 1         | 1     | Cholesterol (total, mean per capita)                   | 611             |
| Ischaemic heart disease | Male   | 15-19 years | 95+ years | Data Rich  | 1         | 1     | Log-transformed SEV scalar: IHD                        | 936             |



**Appendix Table 9: CODEm covariates used, level of covariate, and expected direction of covariate by cause, sex, and age**

*Covariates that CODEm did not select during the covariate selection process have no draw counts listed.*

| Cause                   | Sex    | Age Start   | Age End   | Model Type | Direction | Level | Covariate Name                           | Number of Draws |
|-------------------------|--------|-------------|-----------|------------|-----------|-------|------------------------------------------|-----------------|
| Ischaemic heart disease | Male   | 15-19 years | 95+ years | Data Rich  | 1         | 1     | Smoking Prevalence                       | 1000            |
| Ischaemic heart disease | Male   | 15-19 years | 95+ years | Data Rich  | -1        | 2     | Elevation Over 1500m (proportion)        | 728             |
| Ischaemic heart disease | Male   | 15-19 years | 95+ years | Data Rich  | -1        | 2     | Healthcare access and quality index      | 757             |
| Ischaemic heart disease | Male   | 15-19 years | 95+ years | Data Rich  | 1         | 2     | Indoor Air Pollution (All Cooking Fuels) | 541             |
| Ischaemic heart disease | Male   | 15-19 years | 95+ years | Data Rich  | 1         | 2     | Outdoor Air Pollution (PM2.5)            | 730             |
| Ischaemic heart disease | Male   | 15-19 years | 95+ years | Data Rich  | 1         | 2     | Diabetes Fasting Plasma Glucose (mmol/L) | --              |
| Ischaemic heart disease | Male   | 15-19 years | 95+ years | Data Rich  | 1         | 2     | Mean BMI                                 | --              |
| Ischaemic heart disease | Male   | 15-19 years | 95+ years | Data Rich  | -1        | 3     | fruits adjusted(g)                       | 1               |
| Ischaemic heart disease | Male   | 15-19 years | 95+ years | Data Rich  | -1        | 3     | pufa adjusted(percent)                   | 180             |
| Ischaemic heart disease | Male   | 15-19 years | 95+ years | Data Rich  | -1        | 3     | nuts seeds adjusted(g)                   | 620             |
| Ischaemic heart disease | Male   | 15-19 years | 95+ years | Data Rich  | -1        | 3     | pulses legumes adjusted(g)               | 896             |
| Ischaemic heart disease | Male   | 15-19 years | 95+ years | Data Rich  | -1        | 3     | LDI (1\$ per capita)                     | --              |
| Ischaemic heart disease | Male   | 15-19 years | 95+ years | Data Rich  | -1        | 3     | omega 3 adjusted(g)                      | --              |
| Ischaemic heart disease | Male   | 15-19 years | 95+ years | Data Rich  | -1        | 3     | vegetables adjusted(g)                   | --              |
| Ischaemic heart disease | Male   | 15-19 years | 95+ years | Data Rich  | 0         | 3     | Socio-demographic Index                  | 234             |
| Ischaemic heart disease | Male   | 15-19 years | 95+ years | Data Rich  | 0         | 3     | Alcohol (liters per capita)              | 843             |
| Ischaemic heart disease | Male   | 15-19 years | 95+ years | Data Rich  | 1         | 3     | Diet high in trans fatty acids           | 783             |
| Ischaemic heart disease | Male   | 15-19 years | 95+ years | Global     | 1         | 1     | Log-transformed SEV scalar: IHD          | 791             |
| Ischaemic heart disease | Male   | 15-19 years | 95+ years | Global     | 1         | 1     | Cholesterol (total, mean per capita)     | 851             |
| Ischaemic heart disease | Male   | 15-19 years | 95+ years | Global     | 1         | 1     | Smoking Prevalence                       | 939             |
| Ischaemic heart disease | Male   | 15-19 years | 95+ years | Global     | 1         | 1     | Systolic Blood Pressure (mmHg)           | 966             |
| Ischaemic heart disease | Male   | 15-19 years | 95+ years | Global     | -1        | 2     | Elevation Over 1500m (proportion)        | 667             |
| Ischaemic heart disease | Male   | 15-19 years | 95+ years | Global     | -1        | 2     | Healthcare access and quality index      | 674             |
| Ischaemic heart disease | Male   | 15-19 years | 95+ years | Global     | 1         | 2     | Indoor Air Pollution (All Cooking Fuels) | 233             |
| Ischaemic heart disease | Male   | 15-19 years | 95+ years | Global     | 1         | 2     | Outdoor Air Pollution (PM2.5)            | 671             |
| Ischaemic heart disease | Male   | 15-19 years | 95+ years | Global     | 1         | 2     | Diabetes Fasting Plasma Glucose (mmol/L) | 786             |
| Ischaemic heart disease | Male   | 15-19 years | 95+ years | Global     | 1         | 2     | Mean BMI                                 | --              |
| Ischaemic heart disease | Male   | 15-19 years | 95+ years | Global     | -1        | 3     | fruits adjusted(g)                       | 0               |
| Ischaemic heart disease | Male   | 15-19 years | 95+ years | Global     | -1        | 3     | nuts seeds adjusted(g)                   | 298             |
| Ischaemic heart disease | Male   | 15-19 years | 95+ years | Global     | -1        | 3     | pufa adjusted(percent)                   | 427             |
| Ischaemic heart disease | Male   | 15-19 years | 95+ years | Global     | -1        | 3     | pulses legumes adjusted(g)               | 553             |
| Ischaemic heart disease | Male   | 15-19 years | 95+ years | Global     | -1        | 3     | LDI (1\$ per capita)                     | --              |
| Ischaemic heart disease | Male   | 15-19 years | 95+ years | Global     | -1        | 3     | omega 3 adjusted(g)                      | --              |
| Ischaemic heart disease | Male   | 15-19 years | 95+ years | Global     | -1        | 3     | vegetables adjusted(g)                   | --              |
| Ischaemic heart disease | Male   | 15-19 years | 95+ years | Global     | 0         | 3     | Socio-demographic Index                  | 65              |
| Ischaemic heart disease | Male   | 15-19 years | 95+ years | Global     | 0         | 3     | Alcohol (liters per capita)              | 552             |
| Ischaemic heart disease | Male   | 15-19 years | 95+ years | Global     | 1         | 3     | Diet high in trans fatty acids           | 33              |
| Stroke                  | Female | 0-6 days    | 95+ years | Data Rich  | 1         | 1     | Cholesterol (total, mean per capita)     | 0               |
| Stroke                  | Female | 0-6 days    | 95+ years | Data Rich  | 1         | 1     | Log-transformed SEV scalar: Stroke       | 829             |
| Stroke                  | Female | 0-6 days    | 95+ years | Data Rich  | 1         | 1     | Smoking Prevalence                       | 910             |
| Stroke                  | Female | 0-6 days    | 95+ years | Data Rich  | 1         | 1     | Systolic Blood Pressure (mmHg)           | 1000            |
| Stroke                  | Female | 0-6 days    | 95+ years | Data Rich  | -1        | 2     | Elevation Over 1500m (proportion)        | 0               |
| Stroke                  | Female | 0-6 days    | 95+ years | Data Rich  | -1        | 2     | fruits adjusted(g)                       | 386             |
| Stroke                  | Female | 0-6 days    | 95+ years | Data Rich  | -1        | 2     | Healthcare access and quality index      | 416             |
| Stroke                  | Female | 0-6 days    | 95+ years | Data Rich  | -1        | 2     | vegetables adjusted(g)                   | --              |
| Stroke                  | Female | 0-6 days    | 95+ years | Data Rich  | 1         | 2     | Outdoor Air Pollution (PM2.5)            | 0               |
| Stroke                  | Female | 0-6 days    | 95+ years | Data Rich  | 1         | 2     | Indoor Air Pollution (All Cooking Fuels) | 416             |
| Stroke                  | Female | 0-6 days    | 95+ years | Data Rich  | 1         | 2     | Diabetes Fasting Plasma Glucose (mmol/L) | --              |
| Stroke                  | Female | 0-6 days    | 95+ years | Data Rich  | 1         | 2     | Mean BMI                                 | --              |
| Stroke                  | Female | 0-6 days    | 95+ years | Data Rich  | -1        | 3     | pufa adjusted(percent)                   | 61              |
| Stroke                  | Female | 0-6 days    | 95+ years | Data Rich  | -1        | 3     | pulses legumes adjusted(g)               | 160             |
| Stroke                  | Female | 0-6 days    | 95+ years | Data Rich  | -1        | 3     | nuts seeds adjusted(g)                   | 316             |
| Stroke                  | Female | 0-6 days    | 95+ years | Data Rich  | -1        | 3     | LDI (1\$ per capita)                     | --              |
| Stroke                  | Female | 0-6 days    | 95+ years | Data Rich  | -1        | 3     | omega 3 adjusted(g)                      | --              |
| Stroke                  | Female | 0-6 days    | 95+ years | Data Rich  | 0         | 3     | Socio-demographic Index                  | 488             |
| Stroke                  | Female | 0-6 days    | 95+ years | Data Rich  | 0         | 3     | Alcohol (liters per capita)              | 849             |
| Stroke                  | Female | 0-6 days    | 95+ years | Data Rich  | 1         | 3     | Diet high in trans fatty acids           | 285             |
| Stroke                  | Female | 0-6 days    | 95+ years | Global     | 1         | 1     | Cholesterol (total, mean per capita)     | 28              |
| Stroke                  | Female | 0-6 days    | 95+ years | Global     | 1         | 1     | Log-transformed SEV scalar: Stroke       | 478             |
| Stroke                  | Female | 0-6 days    | 95+ years | Global     | 1         | 1     | Smoking Prevalence                       | 738             |
| Stroke                  | Female | 0-6 days    | 95+ years | Global     | 1         | 1     | Systolic Blood Pressure (mmHg)           | 940             |
| Stroke                  | Female | 0-6 days    | 95+ years | Global     | -1        | 2     | fruits adjusted(g)                       | 245             |
| Stroke                  | Female | 0-6 days    | 95+ years | Global     | -1        | 2     | Healthcare access and quality index      | 817             |
| Stroke                  | Female | 0-6 days    | 95+ years | Global     | -1        | 2     | Elevation Over 1500m (proportion)        | --              |
| Stroke                  | Female | 0-6 days    | 95+ years | Global     | -1        | 2     | vegetables adjusted(g)                   | --              |
| Stroke                  | Female | 0-6 days    | 95+ years | Global     | 1         | 2     | Outdoor Air Pollution (PM2.5)            | 51              |
| Stroke                  | Female | 0-6 days    | 95+ years | Global     | 1         | 2     | Indoor Air Pollution (All Cooking Fuels) | 208             |
| Stroke                  | Female | 0-6 days    | 95+ years | Global     | 1         | 2     | Diabetes Fasting Plasma Glucose (mmol/L) | --              |
| Stroke                  | Female | 0-6 days    | 95+ years | Global     | 1         | 2     | Mean BMI                                 | --              |
| Stroke                  | Female | 0-6 days    | 95+ years | Global     | -1        | 3     | pulses legumes adjusted(g)               | 180             |
| Stroke                  | Female | 0-6 days    | 95+ years | Global     | -1        | 3     | nuts seeds adjusted(g)                   | 208             |
| Stroke                  | Female | 0-6 days    | 95+ years | Global     | -1        | 3     | pufa adjusted(percent)                   | 317             |
| Stroke                  | Female | 0-6 days    | 95+ years | Global     | -1        | 3     | LDI (1\$ per capita)                     | --              |
| Stroke                  | Female | 0-6 days    | 95+ years | Global     | -1        | 3     | omega 3 adjusted(g)                      | --              |
| Stroke                  | Female | 0-6 days    | 95+ years | Global     | 0         | 3     | Socio-demographic Index                  | 233             |
| Stroke                  | Female | 0-6 days    | 95+ years | Global     | 0         | 3     | Alcohol (liters per capita)              | 432             |
| Stroke                  | Female | 0-6 days    | 95+ years | Global     | 1         | 3     | Diet high in trans fatty acids           | 18              |
| Stroke                  | Male   | 0-6 days    | 95+ years | Data Rich  | 1         | 1     | Cholesterol (total, mean per capita)     | 18              |

**Appendix Table 9: CODEm covariates used, level of covariate, and expected direction of covariate by cause, sex, and age**

*Covariates that CODEm did not select during the covariate selection process have no draw counts listed.*

| Cause            | Sex    | Age Start | Age End   | Model Type | Direction | Level | Covariate Name                           | Number of Draws |
|------------------|--------|-----------|-----------|------------|-----------|-------|------------------------------------------|-----------------|
| Stroke           | Male   | 0-6 days  | 95+ years | Data Rich  | 1         | 1     | Systolic Blood Pressure (mmHg)           | 234             |
| Stroke           | Male   | 0-6 days  | 95+ years | Data Rich  | 1         | 1     | Log-transformed SEV scalar: Stroke       | 311             |
| Stroke           | Male   | 0-6 days  | 95+ years | Data Rich  | 1         | 1     | Smoking Prevalence                       | 999             |
| Stroke           | Male   | 0-6 days  | 95+ years | Data Rich  | -1        | 2     | fruits adjusted(g)                       | 148             |
| Stroke           | Male   | 0-6 days  | 95+ years | Data Rich  | -1        | 2     | Elevation Over 1500m (proportion)        | 170             |
| Stroke           | Male   | 0-6 days  | 95+ years | Data Rich  | -1        | 2     | Healthcare access and quality index      | 170             |
| Stroke           | Male   | 0-6 days  | 95+ years | Data Rich  | -1        | 2     | vegetables adjusted(g)                   | --              |
| Stroke           | Male   | 0-6 days  | 95+ years | Data Rich  | 1         | 2     | Outdoor Air Pollution (PM2.5)            | 0               |
| Stroke           | Male   | 0-6 days  | 95+ years | Data Rich  | 1         | 2     | Indoor Air Pollution (All Cooking Fuels) | 33              |
| Stroke           | Male   | 0-6 days  | 95+ years | Data Rich  | 1         | 2     | Diabetes Fasting Plasma Glucose (mmol/L) | --              |
| Stroke           | Male   | 0-6 days  | 95+ years | Data Rich  | 1         | 2     | Mean BMI                                 | --              |
| Stroke           | Male   | 0-6 days  | 95+ years | Data Rich  | -1        | 3     | nuts seeds adjusted(g)                   | 157             |
| Stroke           | Male   | 0-6 days  | 95+ years | Data Rich  | -1        | 3     | pufa adjusted(percent)                   | 310             |
| Stroke           | Male   | 0-6 days  | 95+ years | Data Rich  | -1        | 3     | pulses legumes adjusted(g)               | 612             |
| Stroke           | Male   | 0-6 days  | 95+ years | Data Rich  | -1        | 3     | LDI (1\$ per capita)                     | --              |
| Stroke           | Male   | 0-6 days  | 95+ years | Data Rich  | -1        | 3     | omega 3 adjusted(g)                      | --              |
| Stroke           | Male   | 0-6 days  | 95+ years | Data Rich  | 0         | 3     | Socio-demographic Index                  | 304             |
| Stroke           | Male   | 0-6 days  | 95+ years | Data Rich  | 0         | 3     | Alcohol (liters per capita)              | 915             |
| Stroke           | Male   | 0-6 days  | 95+ years | Data Rich  | 1         | 3     | Diet high in trans fatty acids           | 255             |
| Stroke           | Male   | 0-6 days  | 95+ years | Global     | 1         | 1     | Cholesterol (total, mean per capita)     | 107             |
| Stroke           | Male   | 0-6 days  | 95+ years | Global     | 1         | 1     | Smoking Prevalence                       | 467             |
| Stroke           | Male   | 0-6 days  | 95+ years | Global     | 1         | 1     | Systolic Blood Pressure (mmHg)           | 565             |
| Stroke           | Male   | 0-6 days  | 95+ years | Global     | 1         | 1     | Log-transformed SEV scalar: Stroke       | 708             |
| Stroke           | Male   | 0-6 days  | 95+ years | Global     | -1        | 2     | fruits adjusted(g)                       | 102             |
| Stroke           | Male   | 0-6 days  | 95+ years | Global     | -1        | 2     | Elevation Over 1500m (proportion)        | 258             |
| Stroke           | Male   | 0-6 days  | 95+ years | Global     | -1        | 2     | Healthcare access and quality index      | 761             |
| Stroke           | Male   | 0-6 days  | 95+ years | Global     | -1        | 2     | vegetables adjusted(g)                   | --              |
| Stroke           | Male   | 0-6 days  | 95+ years | Global     | 1         | 2     | Indoor Air Pollution (All Cooking Fuels) | 3               |
| Stroke           | Male   | 0-6 days  | 95+ years | Global     | 1         | 2     | Outdoor Air Pollution (PM2.5)            | 261             |
| Stroke           | Male   | 0-6 days  | 95+ years | Global     | 1         | 2     | Diabetes Fasting Plasma Glucose (mmol/L) | --              |
| Stroke           | Male   | 0-6 days  | 95+ years | Global     | 1         | 2     | Mean BMI                                 | --              |
| Stroke           | Male   | 0-6 days  | 95+ years | Global     | -1        | 3     | pufa adjusted(percent)                   | 179             |
| Stroke           | Male   | 0-6 days  | 95+ years | Global     | -1        | 3     | nuts seeds adjusted(g)                   | 324             |
| Stroke           | Male   | 0-6 days  | 95+ years | Global     | -1        | 3     | pulses legumes adjusted(g)               | 483             |
| Stroke           | Male   | 0-6 days  | 95+ years | Global     | -1        | 3     | LDI (1\$ per capita)                     | --              |
| Stroke           | Male   | 0-6 days  | 95+ years | Global     | -1        | 3     | omega 3 adjusted(g)                      | --              |
| Stroke           | Male   | 0-6 days  | 95+ years | Global     | 0         | 3     | Alcohol (liters per capita)              | 261             |
| Stroke           | Male   | 0-6 days  | 95+ years | Global     | 0         | 3     | Socio-demographic Index                  | 371             |
| Stroke           | Male   | 0-6 days  | 95+ years | Global     | 1         | 3     | Diet high in trans fatty acids           | 136             |
| Ischaemic stroke | Female | 0-6 days  | 95+ years | Data Rich  | 1         | 1     | Cholesterol (total, mean per capita)     | 41              |
| Ischaemic stroke | Female | 0-6 days  | 95+ years | Data Rich  | 1         | 1     | Log-transformed SEV scalar: Isch Stroke  | 107             |
| Ischaemic stroke | Female | 0-6 days  | 95+ years | Data Rich  | 1         | 1     | Smoking Prevalence                       | 239             |
| Ischaemic stroke | Female | 0-6 days  | 95+ years | Data Rich  | 1         | 1     | Systolic Blood Pressure (mmHg)           | 736             |
| Ischaemic stroke | Female | 0-6 days  | 95+ years | Data Rich  | -1        | 2     | Elevation Over 1500m (proportion)        | 577             |
| Ischaemic stroke | Female | 0-6 days  | 95+ years | Data Rich  | -1        | 2     | Healthcare access and quality index      | 577             |
| Ischaemic stroke | Female | 0-6 days  | 95+ years | Data Rich  | 1         | 2     | Outdoor Air Pollution (PM2.5)            | 0               |
| Ischaemic stroke | Female | 0-6 days  | 95+ years | Data Rich  | 1         | 2     | Indoor Air Pollution (All Cooking Fuels) | 604             |
| Ischaemic stroke | Female | 0-6 days  | 95+ years | Data Rich  | 1         | 2     | Diabetes Fasting Plasma Glucose (mmol/L) | --              |
| Ischaemic stroke | Female | 0-6 days  | 95+ years | Data Rich  | 1         | 2     | Mean BMI                                 | --              |
| Ischaemic stroke | Female | 0-6 days  | 95+ years | Data Rich  | -1        | 3     | pulses legumes adjusted(g)               | 0               |
| Ischaemic stroke | Female | 0-6 days  | 95+ years | Data Rich  | -1        | 3     | pufa adjusted(percent)                   | 219             |
| Ischaemic stroke | Female | 0-6 days  | 95+ years | Data Rich  | -1        | 3     | nuts seeds adjusted(g)                   | 343             |
| Ischaemic stroke | Female | 0-6 days  | 95+ years | Data Rich  | -1        | 3     | LDI (1\$ per capita)                     | --              |
| Ischaemic stroke | Female | 0-6 days  | 95+ years | Data Rich  | -1        | 3     | fruits adjusted(g)                       | --              |
| Ischaemic stroke | Female | 0-6 days  | 95+ years | Data Rich  | -1        | 3     | omega 3 adjusted(g)                      | --              |
| Ischaemic stroke | Female | 0-6 days  | 95+ years | Data Rich  | -1        | 3     | vegetables adjusted(g)                   | --              |
| Ischaemic stroke | Female | 0-6 days  | 95+ years | Data Rich  | 0         | 3     | Alcohol (liters per capita)              | 92              |
| Ischaemic stroke | Female | 0-6 days  | 95+ years | Data Rich  | 0         | 3     | Socio-demographic Index                  | 443             |
| Ischaemic stroke | Female | 0-6 days  | 95+ years | Data Rich  | 1         | 3     | Diet high in trans fatty acids           | 424             |
| Ischaemic stroke | Female | 0-6 days  | 95+ years | Global     | 1         | 1     | Systolic Blood Pressure (mmHg)           | 184             |
| Ischaemic stroke | Female | 0-6 days  | 95+ years | Global     | 1         | 1     | Log-transformed SEV scalar: Isch Stroke  | 355             |
| Ischaemic stroke | Female | 0-6 days  | 95+ years | Global     | 1         | 1     | Cholesterol (total, mean per capita)     | 527             |
| Ischaemic stroke | Female | 0-6 days  | 95+ years | Global     | 1         | 1     | Smoking Prevalence                       | 553             |
| Ischaemic stroke | Female | 0-6 days  | 95+ years | Global     | -1        | 2     | Elevation Over 1500m (proportion)        | 728             |
| Ischaemic stroke | Female | 0-6 days  | 95+ years | Global     | -1        | 2     | Healthcare access and quality index      | 815             |
| Ischaemic stroke | Female | 0-6 days  | 95+ years | Global     | 1         | 2     | Indoor Air Pollution (All Cooking Fuels) | 138             |
| Ischaemic stroke | Female | 0-6 days  | 95+ years | Global     | 1         | 2     | Outdoor Air Pollution (PM2.5)            | 457             |
| Ischaemic stroke | Female | 0-6 days  | 95+ years | Global     | 1         | 2     | Diabetes Fasting Plasma Glucose (mmol/L) | --              |
| Ischaemic stroke | Female | 0-6 days  | 95+ years | Global     | 1         | 2     | Mean BMI                                 | --              |
| Ischaemic stroke | Female | 0-6 days  | 95+ years | Global     | -1        | 3     | nuts seeds adjusted(g)                   | 324             |
| Ischaemic stroke | Female | 0-6 days  | 95+ years | Global     | -1        | 3     | pufa adjusted(percent)                   | 483             |
| Ischaemic stroke | Female | 0-6 days  | 95+ years | Global     | -1        | 3     | LDI (1\$ per capita)                     | --              |
| Ischaemic stroke | Female | 0-6 days  | 95+ years | Global     | -1        | 3     | fruits adjusted(g)                       | --              |
| Ischaemic stroke | Female | 0-6 days  | 95+ years | Global     | -1        | 3     | omega 3 adjusted(g)                      | --              |
| Ischaemic stroke | Female | 0-6 days  | 95+ years | Global     | -1        | 3     | pulses legumes adjusted(g)               | --              |
| Ischaemic stroke | Female | 0-6 days  | 95+ years | Global     | -1        | 3     | vegetables adjusted(g)                   | --              |
| Ischaemic stroke | Female | 0-6 days  | 95+ years | Global     | 0         | 3     | Socio-demographic Index                  | 500             |
| Ischaemic stroke | Female | 0-6 days  | 95+ years | Global     | 0         | 3     | Alcohol (liters per capita)              | 650             |

**Appendix Table 9: CODEm covariates used, level of covariate, and expected direction of covariate by cause, sex, and age**

*Covariates that CODEm did not select during the covariate selection process have no draw counts listed.*

| Cause                    | Sex    | Age Start | Age End   | Model Type | Direction | Level | Covariate Name                           | Number of Draws |
|--------------------------|--------|-----------|-----------|------------|-----------|-------|------------------------------------------|-----------------|
| Ischaemic stroke         | Female | 0-6 days  | 95+ years | Global     | 1         | 3     | Diet high in trans fatty acids           | 509             |
| Ischaemic stroke         | Male   | 0-6 days  | 95+ years | Data Rich  | 1         | 1     | Log-transformed SEV scalar: Isch Stroke  | 42              |
| Ischaemic stroke         | Male   | 0-6 days  | 95+ years | Data Rich  | 1         | 1     | Cholesterol (total, mean per capita)     | 64              |
| Ischaemic stroke         | Male   | 0-6 days  | 95+ years | Data Rich  | 1         | 1     | Systolic Blood Pressure (mmHg)           | 918             |
| Ischaemic stroke         | Male   | 0-6 days  | 95+ years | Data Rich  | 1         | 1     | Smoking Prevalence                       | 1000            |
| Ischaemic stroke         | Male   | 0-6 days  | 95+ years | Data Rich  | -1        | 2     | Elevation Over 1500m (proportion)        | 454             |
| Ischaemic stroke         | Male   | 0-6 days  | 95+ years | Data Rich  | -1        | 2     | Healthcare access and quality index      | 454             |
| Ischaemic stroke         | Male   | 0-6 days  | 95+ years | Data Rich  | 1         | 2     | Outdoor Air Pollution (PM2.5)            | 0               |
| Ischaemic stroke         | Male   | 0-6 days  | 95+ years | Data Rich  | 1         | 2     | Indoor Air Pollution (All Cooking Fuels) | 454             |
| Ischaemic stroke         | Male   | 0-6 days  | 95+ years | Data Rich  | 1         | 2     | Diabetes Fasting Plasma Glucose (mmol/L) | --              |
| Ischaemic stroke         | Male   | 0-6 days  | 95+ years | Data Rich  | 1         | 2     | Mean BMI                                 | --              |
| Ischaemic stroke         | Male   | 0-6 days  | 95+ years | Data Rich  | -1        | 3     | pulses legumes adjusted(g)               | 32              |
| Ischaemic stroke         | Male   | 0-6 days  | 95+ years | Data Rich  | -1        | 3     | nuts seeds adjusted(g)                   | 219             |
| Ischaemic stroke         | Male   | 0-6 days  | 95+ years | Data Rich  | -1        | 3     | pufa adjusted(percent)                   | 661             |
| Ischaemic stroke         | Male   | 0-6 days  | 95+ years | Data Rich  | -1        | 3     | LDI (IS per capita)                      | --              |
| Ischaemic stroke         | Male   | 0-6 days  | 95+ years | Data Rich  | -1        | 3     | fruits adjusted(g)                       | --              |
| Ischaemic stroke         | Male   | 0-6 days  | 95+ years | Data Rich  | -1        | 3     | omega 3 adjusted(g)                      | --              |
| Ischaemic stroke         | Male   | 0-6 days  | 95+ years | Data Rich  | -1        | 3     | vegetables adjusted(g)                   | --              |
| Ischaemic stroke         | Male   | 0-6 days  | 95+ years | Data Rich  | 0         | 3     | Alcohol (liters per capita)              | 764             |
| Ischaemic stroke         | Male   | 0-6 days  | 95+ years | Data Rich  | 0         | 3     | Socio-demographic Index                  | 825             |
| Ischaemic stroke         | Male   | 0-6 days  | 95+ years | Data Rich  | 1         | 3     | Diet high in trans fatty acids           | 50              |
| Ischaemic stroke         | Male   | 0-6 days  | 95+ years | Global     | 1         | 1     | Log-transformed SEV scalar: Isch Stroke  | 247             |
| Ischaemic stroke         | Male   | 0-6 days  | 95+ years | Global     | 1         | 1     | Cholesterol (total, mean per capita)     | 384             |
| Ischaemic stroke         | Male   | 0-6 days  | 95+ years | Global     | 1         | 1     | Systolic Blood Pressure (mmHg)           | 548             |
| Ischaemic stroke         | Male   | 0-6 days  | 95+ years | Global     | 1         | 1     | Smoking Prevalence                       | 952             |
| Ischaemic stroke         | Male   | 0-6 days  | 95+ years | Global     | -1        | 2     | Elevation Over 1500m (proportion)        | 408             |
| Ischaemic stroke         | Male   | 0-6 days  | 95+ years | Global     | -1        | 2     | Healthcare access and quality index      | 489             |
| Ischaemic stroke         | Male   | 0-6 days  | 95+ years | Global     | 1         | 2     | Indoor Air Pollution (All Cooking Fuels) | 250             |
| Ischaemic stroke         | Male   | 0-6 days  | 95+ years | Global     | 1         | 2     | Outdoor Air Pollution (PM2.5)            | 557             |
| Ischaemic stroke         | Male   | 0-6 days  | 95+ years | Global     | 1         | 2     | Diabetes Fasting Plasma Glucose (mmol/L) | 574             |
| Ischaemic stroke         | Male   | 0-6 days  | 95+ years | Global     | 1         | 2     | Mean BMI                                 | --              |
| Ischaemic stroke         | Male   | 0-6 days  | 95+ years | Global     | -1        | 3     | pufa adjusted(percent)                   | 90              |
| Ischaemic stroke         | Male   | 0-6 days  | 95+ years | Global     | -1        | 3     | nuts seeds adjusted(g)                   | 274             |
| Ischaemic stroke         | Male   | 0-6 days  | 95+ years | Global     | -1        | 3     | LDI (IS per capita)                      | --              |
| Ischaemic stroke         | Male   | 0-6 days  | 95+ years | Global     | -1        | 3     | fruits adjusted(g)                       | --              |
| Ischaemic stroke         | Male   | 0-6 days  | 95+ years | Global     | -1        | 3     | omega 3 adjusted(g)                      | --              |
| Ischaemic stroke         | Male   | 0-6 days  | 95+ years | Global     | -1        | 3     | pulses legumes adjusted(g)               | --              |
| Ischaemic stroke         | Male   | 0-6 days  | 95+ years | Global     | -1        | 3     | vegetables adjusted(g)                   | --              |
| Ischaemic stroke         | Male   | 0-6 days  | 95+ years | Global     | 0         | 3     | Socio-demographic Index                  | 299             |
| Ischaemic stroke         | Male   | 0-6 days  | 95+ years | Global     | 0         | 3     | Alcohol (liters per capita)              | 643             |
| Ischaemic stroke         | Male   | 0-6 days  | 95+ years | Global     | 1         | 3     | Diet high in trans fatty acids           | 226             |
| Intracerebral hemorrhage | Female | 0-6 days  | 95+ years | Data Rich  | 0         | 1     | Cholesterol (total, mean per capita)     | 821             |
| Intracerebral hemorrhage | Female | 0-6 days  | 95+ years | Data Rich  | 1         | 1     | Log-transformed SEV scalar: Hem Stroke   | 92              |
| Intracerebral hemorrhage | Female | 0-6 days  | 95+ years | Data Rich  | 1         | 1     | Smoking Prevalence                       | 993             |
| Intracerebral hemorrhage | Female | 0-6 days  | 95+ years | Data Rich  | 1         | 1     | Systolic Blood Pressure (mmHg)           | 1000            |
| Intracerebral hemorrhage | Female | 0-6 days  | 95+ years | Data Rich  | -1        | 2     | Elevation Over 1500m (proportion)        | 255             |
| Intracerebral hemorrhage | Female | 0-6 days  | 95+ years | Data Rich  | -1        | 2     | Healthcare access and quality index      | 402             |
| Intracerebral hemorrhage | Female | 0-6 days  | 95+ years | Data Rich  | 1         | 2     | Outdoor Air Pollution (PM2.5)            | 441             |
| Intracerebral hemorrhage | Female | 0-6 days  | 95+ years | Data Rich  | 1         | 2     | Indoor Air Pollution (All Cooking Fuels) | 445             |
| Intracerebral hemorrhage | Female | 0-6 days  | 95+ years | Data Rich  | 1         | 2     | Diabetes Fasting Plasma Glucose (mmol/L) | --              |
| Intracerebral hemorrhage | Female | 0-6 days  | 95+ years | Data Rich  | 1         | 2     | Mean BMI                                 | --              |
| Intracerebral hemorrhage | Female | 0-6 days  | 95+ years | Data Rich  | -1        | 3     | pulses legumes adjusted(g)               | 160             |
| Intracerebral hemorrhage | Female | 0-6 days  | 95+ years | Data Rich  | -1        | 3     | fruits adjusted(g)                       | 299             |
| Intracerebral hemorrhage | Female | 0-6 days  | 95+ years | Data Rich  | -1        | 3     | nuts seeds adjusted(g)                   | 422             |
| Intracerebral hemorrhage | Female | 0-6 days  | 95+ years | Data Rich  | -1        | 3     | LDI (IS per capita)                      | --              |
| Intracerebral hemorrhage | Female | 0-6 days  | 95+ years | Data Rich  | -1        | 3     | omega 3 adjusted(g)                      | --              |
| Intracerebral hemorrhage | Female | 0-6 days  | 95+ years | Data Rich  | -1        | 3     | pufa adjusted(percent)                   | --              |
| Intracerebral hemorrhage | Female | 0-6 days  | 95+ years | Data Rich  | -1        | 3     | vegetables adjusted(g)                   | --              |
| Intracerebral hemorrhage | Female | 0-6 days  | 95+ years | Data Rich  | 0         | 3     | Socio-demographic Index                  | 145             |
| Intracerebral hemorrhage | Female | 0-6 days  | 95+ years | Data Rich  | 0         | 3     | Alcohol (liters per capita)              | 755             |
| Intracerebral hemorrhage | Female | 0-6 days  | 95+ years | Data Rich  | 1         | 3     | Diet high in trans fatty acids           | 0               |
| Intracerebral hemorrhage | Female | 0-6 days  | 95+ years | Global     | 0         | 1     | Cholesterol (total, mean per capita)     | 960             |
| Intracerebral hemorrhage | Female | 0-6 days  | 95+ years | Global     | 1         | 1     | Log-transformed SEV scalar: Hem Stroke   | 364             |
| Intracerebral hemorrhage | Female | 0-6 days  | 95+ years | Global     | 1         | 1     | Smoking Prevalence                       | 930             |
| Intracerebral hemorrhage | Female | 0-6 days  | 95+ years | Global     | 1         | 1     | Systolic Blood Pressure (mmHg)           | 996             |
| Intracerebral hemorrhage | Female | 0-6 days  | 95+ years | Global     | -1        | 2     | Healthcare access and quality index      | 427             |
| Intracerebral hemorrhage | Female | 0-6 days  | 95+ years | Global     | -1        | 2     | Elevation Over 1500m (proportion)        | --              |
| Intracerebral hemorrhage | Female | 0-6 days  | 95+ years | Global     | 1         | 2     | Indoor Air Pollution (All Cooking Fuels) | 36              |
| Intracerebral hemorrhage | Female | 0-6 days  | 95+ years | Global     | 1         | 2     | Outdoor Air Pollution (PM2.5)            | 40              |
| Intracerebral hemorrhage | Female | 0-6 days  | 95+ years | Global     | 1         | 2     | Diabetes Fasting Plasma Glucose (mmol/L) | --              |
| Intracerebral hemorrhage | Female | 0-6 days  | 95+ years | Global     | 1         | 2     | Mean BMI                                 | --              |
| Intracerebral hemorrhage | Female | 0-6 days  | 95+ years | Global     | -1        | 3     | fruits adjusted(g)                       | 10              |
| Intracerebral hemorrhage | Female | 0-6 days  | 95+ years | Global     | -1        | 3     | nuts seeds adjusted(g)                   | 364             |
| Intracerebral hemorrhage | Female | 0-6 days  | 95+ years | Global     | -1        | 3     | pulses legumes adjusted(g)               | 698             |
| Intracerebral hemorrhage | Female | 0-6 days  | 95+ years | Global     | -1        | 3     | LDI (IS per capita)                      | --              |
| Intracerebral hemorrhage | Female | 0-6 days  | 95+ years | Global     | -1        | 3     | omega 3 adjusted(g)                      | --              |
| Intracerebral hemorrhage | Female | 0-6 days  | 95+ years | Global     | -1        | 3     | pufa adjusted(percent)                   | --              |
| Intracerebral hemorrhage | Female | 0-6 days  | 95+ years | Global     | -1        | 3     | vegetables adjusted(g)                   | --              |

**Appendix Table 9: CODEm covariates used, level of covariate, and expected direction of covariate by cause, sex, and age**  
*Covariates that CODEm did not select during the covariate selection process have no draw counts listed.*

| Cause                      | Sex    | Age Start   | Age End   | Model Type | Direction | Level | Covariate Name                           | Number of Draws |
|----------------------------|--------|-------------|-----------|------------|-----------|-------|------------------------------------------|-----------------|
| Intracerebral hemorrhage   | Female | 0-6 days    | 95+ years | Global     | 0         | 3     | Alcohol (liters per capita)              | 230             |
| Intracerebral hemorrhage   | Female | 0-6 days    | 95+ years | Global     | 0         | 3     | Socio-demographic Index                  | 481             |
| Intracerebral hemorrhage   | Female | 0-6 days    | 95+ years | Global     | 1         | 3     | Diet high in trans fatty acids           | 0               |
| Intracerebral hemorrhage   | Male   | 0-6 days    | 95+ years | Data Rich  | 0         | 1     | Cholesterol (total, mean per capita)     | 811             |
| Intracerebral hemorrhage   | Male   | 0-6 days    | 95+ years | Data Rich  | 1         | 1     | Log-transformed SEV scalar: Hem Stroke   | 12              |
| Intracerebral hemorrhage   | Male   | 0-6 days    | 95+ years | Data Rich  | 1         | 1     | Systolic Blood Pressure (mmHg)           | 815             |
| Intracerebral hemorrhage   | Male   | 0-6 days    | 95+ years | Data Rich  | 1         | 1     | Smoking Prevalence                       | 1000            |
| Intracerebral hemorrhage   | Male   | 0-6 days    | 95+ years | Data Rich  | -1        | 2     | Healthcare access and quality index      | 805             |
| Intracerebral hemorrhage   | Male   | 0-6 days    | 95+ years | Data Rich  | -1        | 2     | Elevation Over 1500m (proportion)        | 833             |
| Intracerebral hemorrhage   | Male   | 0-6 days    | 95+ years | Data Rich  | 1         | 2     | Indoor Air Pollution (All Cooking Fuels) | 222             |
| Intracerebral hemorrhage   | Male   | 0-6 days    | 95+ years | Data Rich  | 1         | 2     | Outdoor Air Pollution (PM2.5)            | 930             |
| Intracerebral hemorrhage   | Male   | 0-6 days    | 95+ years | Data Rich  | 1         | 2     | Diabetes Fasting Plasma Glucose (mmol/L) | --              |
| Intracerebral hemorrhage   | Male   | 0-6 days    | 95+ years | Data Rich  | 1         | 2     | Mean BMI                                 | --              |
| Intracerebral hemorrhage   | Male   | 0-6 days    | 95+ years | Data Rich  | -1        | 3     | fruits adjusted(g)                       | 46              |
| Intracerebral hemorrhage   | Male   | 0-6 days    | 95+ years | Data Rich  | -1        | 3     | nuts seeds adjusted(g)                   | 89              |
| Intracerebral hemorrhage   | Male   | 0-6 days    | 95+ years | Data Rich  | -1        | 3     | pulses legumes adjusted(g)               | 681             |
| Intracerebral hemorrhage   | Male   | 0-6 days    | 95+ years | Data Rich  | -1        | 3     | LDI (IS per capita)                      | --              |
| Intracerebral hemorrhage   | Male   | 0-6 days    | 95+ years | Data Rich  | -1        | 3     | omega 3 adjusted(g)                      | --              |
| Intracerebral hemorrhage   | Male   | 0-6 days    | 95+ years | Data Rich  | -1        | 3     | pufa adjusted(percent)                   | --              |
| Intracerebral hemorrhage   | Male   | 0-6 days    | 95+ years | Data Rich  | -1        | 3     | vegetables adjusted(g)                   | --              |
| Intracerebral hemorrhage   | Male   | 0-6 days    | 95+ years | Data Rich  | 0         | 3     | Alcohol (liters per capita)              | 300             |
| Intracerebral hemorrhage   | Male   | 0-6 days    | 95+ years | Data Rich  | 0         | 3     | Socio-demographic Index                  | 585             |
| Intracerebral hemorrhage   | Male   | 0-6 days    | 95+ years | Data Rich  | 1         | 3     | Diet high in trans fatty acids           | 0               |
| Intracerebral hemorrhage   | Male   | 0-6 days    | 95+ years | Global     | 0         | 1     | Cholesterol (total, mean per capita)     | 509             |
| Intracerebral hemorrhage   | Male   | 0-6 days    | 95+ years | Global     | 1         | 1     | Log-transformed SEV scalar: Hem Stroke   | 298             |
| Intracerebral hemorrhage   | Male   | 0-6 days    | 95+ years | Global     | 1         | 1     | Systolic Blood Pressure (mmHg)           | 435             |
| Intracerebral hemorrhage   | Male   | 0-6 days    | 95+ years | Global     | 1         | 1     | Smoking Prevalence                       | 998             |
| Intracerebral hemorrhage   | Male   | 0-6 days    | 95+ years | Global     | -1        | 2     | Healthcare access and quality index      | 458             |
| Intracerebral hemorrhage   | Male   | 0-6 days    | 95+ years | Global     | -1        | 2     | Elevation Over 1500m (proportion)        | --              |
| Intracerebral hemorrhage   | Male   | 0-6 days    | 95+ years | Global     | 1         | 2     | Indoor Air Pollution (All Cooking Fuels) | 478             |
| Intracerebral hemorrhage   | Male   | 0-6 days    | 95+ years | Global     | 1         | 2     | Outdoor Air Pollution (PM2.5)            | 864             |
| Intracerebral hemorrhage   | Male   | 0-6 days    | 95+ years | Global     | 1         | 2     | Diabetes Fasting Plasma Glucose (mmol/L) | --              |
| Intracerebral hemorrhage   | Male   | 0-6 days    | 95+ years | Global     | 1         | 2     | Mean BMI                                 | --              |
| Intracerebral hemorrhage   | Male   | 0-6 days    | 95+ years | Global     | -1        | 3     | fruits adjusted(g)                       | 0               |
| Intracerebral hemorrhage   | Male   | 0-6 days    | 95+ years | Global     | -1        | 3     | nuts seeds adjusted(g)                   | 247             |
| Intracerebral hemorrhage   | Male   | 0-6 days    | 95+ years | Global     | -1        | 3     | pulses legumes adjusted(g)               | 855             |
| Intracerebral hemorrhage   | Male   | 0-6 days    | 95+ years | Global     | -1        | 3     | LDI (IS per capita)                      | --              |
| Intracerebral hemorrhage   | Male   | 0-6 days    | 95+ years | Global     | -1        | 3     | omega 3 adjusted(g)                      | --              |
| Intracerebral hemorrhage   | Male   | 0-6 days    | 95+ years | Global     | -1        | 3     | pufa adjusted(percent)                   | --              |
| Intracerebral hemorrhage   | Male   | 0-6 days    | 95+ years | Global     | -1        | 3     | vegetables adjusted(g)                   | --              |
| Intracerebral hemorrhage   | Male   | 0-6 days    | 95+ years | Global     | 0         | 3     | Socio-demographic Index                  | 492             |
| Intracerebral hemorrhage   | Male   | 0-6 days    | 95+ years | Global     | 0         | 3     | Alcohol (liters per capita)              | 713             |
| Intracerebral hemorrhage   | Male   | 0-6 days    | 95+ years | Global     | 1         | 3     | Diet high in trans fatty acids           | 242             |
| Subarachnoid hemorrhage    | Female | 0-6 days    | 95+ years | Data Rich  | 1         | 1     | Systolic Blood Pressure (mmHg)           | 468             |
| Subarachnoid hemorrhage    | Female | 0-6 days    | 95+ years | Data Rich  | 1         | 1     | Smoking Prevalence                       | 866             |
| Subarachnoid hemorrhage    | Female | 0-6 days    | 95+ years | Data Rich  | -1        | 2     | Healthcare access and quality index      | 308             |
| Subarachnoid hemorrhage    | Female | 0-6 days    | 95+ years | Data Rich  | -1        | 3     | LDI (IS per capita)                      | --              |
| Subarachnoid hemorrhage    | Female | 0-6 days    | 95+ years | Data Rich  | 0         | 3     | Socio-demographic Index                  | 178             |
| Subarachnoid hemorrhage    | Female | 0-6 days    | 95+ years | Data Rich  | 0         | 3     | Alcohol (liters per capita)              | 237             |
| Subarachnoid hemorrhage    | Female | 0-6 days    | 95+ years | Global     | 1         | 1     | Systolic Blood Pressure (mmHg)           | 564             |
| Subarachnoid hemorrhage    | Female | 0-6 days    | 95+ years | Global     | 1         | 1     | Smoking Prevalence                       | 936             |
| Subarachnoid hemorrhage    | Female | 0-6 days    | 95+ years | Global     | -1        | 2     | Healthcare access and quality index      | 647             |
| Subarachnoid hemorrhage    | Female | 0-6 days    | 95+ years | Global     | -1        | 3     | LDI (IS per capita)                      | --              |
| Subarachnoid hemorrhage    | Female | 0-6 days    | 95+ years | Global     | 0         | 3     | Alcohol (liters per capita)              | 351             |
| Subarachnoid hemorrhage    | Female | 0-6 days    | 95+ years | Global     | 0         | 3     | Socio-demographic Index                  | 446             |
| Subarachnoid hemorrhage    | Male   | 0-6 days    | 95+ years | Data Rich  | 1         | 1     | Smoking Prevalence                       | 330             |
| Subarachnoid hemorrhage    | Male   | 0-6 days    | 95+ years | Data Rich  | 1         | 1     | Systolic Blood Pressure (mmHg)           | 1000            |
| Subarachnoid hemorrhage    | Male   | 0-6 days    | 95+ years | Data Rich  | -1        | 2     | Healthcare access and quality index      | 401             |
| Subarachnoid hemorrhage    | Male   | 0-6 days    | 95+ years | Data Rich  | -1        | 3     | LDI (IS per capita)                      | --              |
| Subarachnoid hemorrhage    | Male   | 0-6 days    | 95+ years | Data Rich  | 0         | 3     | Socio-demographic Index                  | 476             |
| Subarachnoid hemorrhage    | Male   | 0-6 days    | 95+ years | Data Rich  | 0         | 3     | Alcohol (liters per capita)              | 554             |
| Subarachnoid hemorrhage    | Male   | 0-6 days    | 95+ years | Global     | 1         | 1     | Systolic Blood Pressure (mmHg)           | 66              |
| Subarachnoid hemorrhage    | Male   | 0-6 days    | 95+ years | Global     | 1         | 1     | Smoking Prevalence                       | 245             |
| Subarachnoid hemorrhage    | Male   | 0-6 days    | 95+ years | Global     | -1        | 2     | Healthcare access and quality index      | 592             |
| Subarachnoid hemorrhage    | Male   | 0-6 days    | 95+ years | Global     | -1        | 3     | LDI (IS per capita)                      | --              |
| Subarachnoid hemorrhage    | Male   | 0-6 days    | 95+ years | Global     | 0         | 3     | Alcohol (liters per capita)              | 228             |
| Subarachnoid hemorrhage    | Male   | 0-6 days    | 95+ years | Global     | 0         | 3     | Socio-demographic Index                  | 371             |
| Hypertensive heart disease | Female | 15-19 years | 95+ years | Data Rich  | 1         | 1     | Systolic Blood Pressure (mmHg)           | 615             |
| Hypertensive heart disease | Female | 15-19 years | 95+ years | Data Rich  | -1        | 2     | Healthcare access and quality index      | 214             |
| Hypertensive heart disease | Female | 15-19 years | 95+ years | Data Rich  | 1         | 2     | Smoking Prevalence                       | 141             |
| Hypertensive heart disease | Female | 15-19 years | 95+ years | Data Rich  | 1         | 2     | Cholesterol (total, mean per capita)     | --              |
| Hypertensive heart disease | Female | 15-19 years | 95+ years | Data Rich  | 1         | 2     | Mean BMI                                 | --              |
| Hypertensive heart disease | Female | 15-19 years | 95+ years | Data Rich  | -1        | 3     | LDI (IS per capita)                      | --              |
| Hypertensive heart disease | Female | 15-19 years | 95+ years | Data Rich  | -1        | 3     | fruits adjusted(g)                       | --              |
| Hypertensive heart disease | Female | 15-19 years | 95+ years | Data Rich  | -1        | 3     | nuts seeds adjusted(g)                   | --              |
| Hypertensive heart disease | Female | 15-19 years | 95+ years | Data Rich  | -1        | 3     | omega 3 adjusted(g)                      | --              |
| Hypertensive heart disease | Female | 15-19 years | 95+ years | Data Rich  | -1        | 3     | pufa adjusted(percent)                   | --              |
| Hypertensive heart disease | Female | 15-19 years | 95+ years | Data Rich  | -1        | 3     | pulses legumes adjusted(g)               | --              |

**Appendix Table 9: CODEm covariates used, level of covariate, and expected direction of covariate by cause, sex, and age**

*Covariates that CODEm did not select during the covariate selection process have no draw counts listed.*

| Cause                                | Sex    | Age Start   | Age End   | Model Type | Direction | Level | Covariate Name                       | Number of Draws |
|--------------------------------------|--------|-------------|-----------|------------|-----------|-------|--------------------------------------|-----------------|
| Hypertensive heart disease           | Female | 15-19 years | 95+ years | Data Rich  | -1        | 3     | vegetables adjusted(g)               | --              |
| Hypertensive heart disease           | Female | 15-19 years | 95+ years | Data Rich  | 0         | 3     | Socio-demographic Index              | 433             |
| Hypertensive heart disease           | Female | 15-19 years | 95+ years | Data Rich  | 0         | 3     | Alcohol (liters per capita)          | 448             |
| Hypertensive heart disease           | Female | 15-19 years | 95+ years | Data Rich  | 1         | 3     | Diet high in trans fatty acids       | --              |
| Hypertensive heart disease           | Female | 15-19 years | 95+ years | Global     | 1         | 1     | Systolic Blood Pressure (mmHg)       | 480             |
| Hypertensive heart disease           | Female | 15-19 years | 95+ years | Global     | -1        | 2     | Healthcare access and quality index  | 389             |
| Hypertensive heart disease           | Female | 15-19 years | 95+ years | Global     | 1         | 2     | Smoking Prevalence                   | 277             |
| Hypertensive heart disease           | Female | 15-19 years | 95+ years | Global     | 1         | 2     | Cholesterol (total, mean per capita) | --              |
| Hypertensive heart disease           | Female | 15-19 years | 95+ years | Global     | 1         | 2     | Mean BMI                             | --              |
| Hypertensive heart disease           | Female | 15-19 years | 95+ years | Global     | -1        | 3     | nuts seeds adjusted(g)               | 14              |
| Hypertensive heart disease           | Female | 15-19 years | 95+ years | Global     | -1        | 3     | fruits adjusted(g)                   | 47              |
| Hypertensive heart disease           | Female | 15-19 years | 95+ years | Global     | -1        | 3     | LDI (1\$ per capita)                 | --              |
| Hypertensive heart disease           | Female | 15-19 years | 95+ years | Global     | -1        | 3     | omega 3 adjusted(g)                  | --              |
| Hypertensive heart disease           | Female | 15-19 years | 95+ years | Global     | -1        | 3     | pufa adjusted(percent)               | --              |
| Hypertensive heart disease           | Female | 15-19 years | 95+ years | Global     | -1        | 3     | pulses legumes adjusted(g)           | --              |
| Hypertensive heart disease           | Female | 15-19 years | 95+ years | Global     | -1        | 3     | vegetables adjusted(g)               | --              |
| Hypertensive heart disease           | Female | 15-19 years | 95+ years | Global     | 0         | 3     | Alcohol (liters per capita)          | 425             |
| Hypertensive heart disease           | Female | 15-19 years | 95+ years | Global     | 0         | 3     | Socio-demographic Index              | 560             |
| Hypertensive heart disease           | Female | 15-19 years | 95+ years | Global     | 1         | 3     | Diet high in trans fatty acids       | --              |
| Hypertensive heart disease           | Male   | 15-19 years | 95+ years | Data Rich  | 1         | 1     | Systolic Blood Pressure (mmHg)       | --              |
| Hypertensive heart disease           | Male   | 15-19 years | 95+ years | Data Rich  | -1        | 2     | Healthcare access and quality index  | 285             |
| Hypertensive heart disease           | Male   | 15-19 years | 95+ years | Data Rich  | 1         | 2     | Smoking Prevalence                   | 647             |
| Hypertensive heart disease           | Male   | 15-19 years | 95+ years | Data Rich  | 1         | 2     | Cholesterol (total, mean per capita) | --              |
| Hypertensive heart disease           | Male   | 15-19 years | 95+ years | Data Rich  | 1         | 2     | Mean BMI                             | --              |
| Hypertensive heart disease           | Male   | 15-19 years | 95+ years | Data Rich  | -1        | 3     | pulses legumes adjusted(g)           | 145             |
| Hypertensive heart disease           | Male   | 15-19 years | 95+ years | Data Rich  | -1        | 3     | LDI (1\$ per capita)                 | --              |
| Hypertensive heart disease           | Male   | 15-19 years | 95+ years | Data Rich  | -1        | 3     | fruits adjusted(g)                   | --              |
| Hypertensive heart disease           | Male   | 15-19 years | 95+ years | Data Rich  | -1        | 3     | nuts seeds adjusted(g)               | --              |
| Hypertensive heart disease           | Male   | 15-19 years | 95+ years | Data Rich  | -1        | 3     | omega 3 adjusted(g)                  | --              |
| Hypertensive heart disease           | Male   | 15-19 years | 95+ years | Data Rich  | -1        | 3     | pufa adjusted(percent)               | --              |
| Hypertensive heart disease           | Male   | 15-19 years | 95+ years | Data Rich  | -1        | 3     | vegetables adjusted(g)               | --              |
| Hypertensive heart disease           | Male   | 15-19 years | 95+ years | Data Rich  | 0         | 3     | Alcohol (liters per capita)          | 248             |
| Hypertensive heart disease           | Male   | 15-19 years | 95+ years | Data Rich  | 0         | 3     | Socio-demographic Index              | 477             |
| Hypertensive heart disease           | Male   | 15-19 years | 95+ years | Data Rich  | 1         | 3     | Diet high in trans fatty acids       | --              |
| Hypertensive heart disease           | Male   | 15-19 years | 95+ years | Global     | 1         | 1     | Systolic Blood Pressure (mmHg)       | 110             |
| Hypertensive heart disease           | Male   | 15-19 years | 95+ years | Global     | -1        | 2     | Healthcare access and quality index  | 557             |
| Hypertensive heart disease           | Male   | 15-19 years | 95+ years | Global     | 1         | 2     | Mean BMI                             | 430             |
| Hypertensive heart disease           | Male   | 15-19 years | 95+ years | Global     | 1         | 2     | Smoking Prevalence                   | 547             |
| Hypertensive heart disease           | Male   | 15-19 years | 95+ years | Global     | 1         | 2     | Cholesterol (total, mean per capita) | --              |
| Hypertensive heart disease           | Male   | 15-19 years | 95+ years | Global     | -1        | 3     | fruits adjusted(g)                   | 31              |
| Hypertensive heart disease           | Male   | 15-19 years | 95+ years | Global     | -1        | 3     | LDI (1\$ per capita)                 | --              |
| Hypertensive heart disease           | Male   | 15-19 years | 95+ years | Global     | -1        | 3     | nuts seeds adjusted(g)               | --              |
| Hypertensive heart disease           | Male   | 15-19 years | 95+ years | Global     | -1        | 3     | omega 3 adjusted(g)                  | --              |
| Hypertensive heart disease           | Male   | 15-19 years | 95+ years | Global     | -1        | 3     | pufa adjusted(percent)               | --              |
| Hypertensive heart disease           | Male   | 15-19 years | 95+ years | Global     | -1        | 3     | pulses legumes adjusted(g)           | --              |
| Hypertensive heart disease           | Male   | 15-19 years | 95+ years | Global     | -1        | 3     | vegetables adjusted(g)               | --              |
| Hypertensive heart disease           | Male   | 15-19 years | 95+ years | Global     | 0         | 3     | Socio-demographic Index              | 251             |
| Hypertensive heart disease           | Male   | 15-19 years | 95+ years | Global     | 0         | 3     | Alcohol (liters per capita)          | 429             |
| Hypertensive heart disease           | Male   | 15-19 years | 95+ years | Global     | 1         | 3     | Diet high in trans fatty acids       | --              |
| Non-rheumatic valvular heart disease | Female | 15-19 years | 95+ years | Data Rich  | 1         | 1     | Systolic Blood Pressure (mmHg)       | 370             |
| Non-rheumatic valvular heart disease | Female | 15-19 years | 95+ years | Data Rich  | 1         | 1     | Smoking Prevalence                   | 416             |
| Non-rheumatic valvular heart disease | Female | 15-19 years | 95+ years | Data Rich  | -1        | 2     | Healthcare access and quality index  | --              |
| Non-rheumatic valvular heart disease | Female | 15-19 years | 95+ years | Data Rich  | 1         | 2     | Mean BMI                             | 276             |
| Non-rheumatic valvular heart disease | Female | 15-19 years | 95+ years | Data Rich  | 1         | 2     | Cholesterol (total, mean per capita) | --              |
| Non-rheumatic valvular heart disease | Female | 15-19 years | 95+ years | Data Rich  | -1        | 3     | LDI (1\$ per capita)                 | --              |
| Non-rheumatic valvular heart disease | Female | 15-19 years | 95+ years | Data Rich  | 0         | 3     | Socio-demographic Index              | 420             |
| Non-rheumatic valvular heart disease | Female | 15-19 years | 95+ years | Data Rich  | 0         | 3     | Alcohol (liters per capita)          | 431             |
| Non-rheumatic valvular heart disease | Female | 15-19 years | 95+ years | Global     | 1         | 1     | Systolic Blood Pressure (mmHg)       | 350             |
| Non-rheumatic valvular heart disease | Female | 15-19 years | 95+ years | Global     | 1         | 1     | Smoking Prevalence                   | 414             |
| Non-rheumatic valvular heart disease | Female | 15-19 years | 95+ years | Global     | -1        | 2     | Healthcare access and quality index  | 183             |
| Non-rheumatic valvular heart disease | Female | 15-19 years | 95+ years | Global     | 1         | 2     | Mean BMI                             | 525             |
| Non-rheumatic valvular heart disease | Female | 15-19 years | 95+ years | Global     | 1         | 2     | Cholesterol (total, mean per capita) | --              |
| Non-rheumatic valvular heart disease | Female | 15-19 years | 95+ years | Global     | -1        | 3     | LDI (1\$ per capita)                 | --              |
| Non-rheumatic valvular heart disease | Female | 15-19 years | 95+ years | Global     | 0         | 3     | Socio-demographic Index              | 513             |
| Non-rheumatic valvular heart disease | Female | 15-19 years | 95+ years | Global     | 0         | 3     | Alcohol (liters per capita)          | 673             |
| Non-rheumatic valvular heart disease | Male   | 15-19 years | 95+ years | Data Rich  | 1         | 1     | Systolic Blood Pressure (mmHg)       | 149             |
| Non-rheumatic valvular heart disease | Male   | 15-19 years | 95+ years | Data Rich  | 1         | 1     | Smoking Prevalence                   | 272             |
| Non-rheumatic valvular heart disease | Male   | 15-19 years | 95+ years | Data Rich  | -1        | 2     | Healthcare access and quality index  | 77              |
| Non-rheumatic valvular heart disease | Male   | 15-19 years | 95+ years | Data Rich  | 1         | 2     | Mean BMI                             | 599             |
| Non-rheumatic valvular heart disease | Male   | 15-19 years | 95+ years | Data Rich  | 1         | 2     | Cholesterol (total, mean per capita) | --              |
| Non-rheumatic valvular heart disease | Male   | 15-19 years | 95+ years | Data Rich  | -1        | 3     | LDI (1\$ per capita)                 | --              |
| Non-rheumatic valvular heart disease | Male   | 15-19 years | 95+ years | Data Rich  | 0         | 3     | Alcohol (liters per capita)          | 280             |
| Non-rheumatic valvular heart disease | Male   | 15-19 years | 95+ years | Data Rich  | 0         | 3     | Socio-demographic Index              | 401             |
| Non-rheumatic valvular heart disease | Male   | 15-19 years | 95+ years | Global     | 1         | 1     | Smoking Prevalence                   | 248             |
| Non-rheumatic valvular heart disease | Male   | 15-19 years | 95+ years | Global     | 1         | 1     | Systolic Blood Pressure (mmHg)       | 395             |
| Non-rheumatic valvular heart disease | Male   | 15-19 years | 95+ years | Global     | -1        | 2     | Healthcare access and quality index  | 268             |
| Non-rheumatic valvular heart disease | Male   | 15-19 years | 95+ years | Global     | 1         | 2     | Mean BMI                             | 299             |
| Non-rheumatic valvular heart disease | Male   | 15-19 years | 95+ years | Global     | 1         | 2     | Cholesterol (total, mean per capita) | --              |

**Appendix Table 9: CODEm covariates used, level of covariate, and expected direction of covariate by cause, sex, and age**

*Covariates that CODEm did not select during the covariate selection process have no draw counts listed.*

| Cause                                           | Sex    | Age Start   | Age End   | Model Type | Direction | Level | Covariate Name                           | Number of Draws |
|-------------------------------------------------|--------|-------------|-----------|------------|-----------|-------|------------------------------------------|-----------------|
| Non-rheumatic valvular heart disease            | Male   | 15-19 years | 95+ years | Global     | -1        | 3     | LDI (IS per capita)                      | --              |
| Non-rheumatic valvular heart disease            | Male   | 15-19 years | 95+ years | Global     | 0         | 3     | Alcohol (liters per capita)              | 402             |
| Non-rheumatic valvular heart disease            | Male   | 15-19 years | 95+ years | Global     | 0         | 3     | Socio-demographic Index                  | 576             |
| Non-rheumatic calcific aortic valve disease     | Female | 15-19 years | 95+ years | Data Rich  | 1         | 1     | Smoking Prevalence                       | 277             |
| Non-rheumatic calcific aortic valve disease     | Female | 15-19 years | 95+ years | Data Rich  | 1         | 1     | Mean BMI                                 | 1000            |
| Non-rheumatic calcific aortic valve disease     | Female | 15-19 years | 95+ years | Data Rich  | 1         | 1     | Systolic Blood Pressure (mmHg)           | --              |
| Non-rheumatic calcific aortic valve disease     | Female | 15-19 years | 95+ years | Data Rich  | -1        | 2     | Healthcare access and quality index      | --              |
| Non-rheumatic calcific aortic valve disease     | Female | 15-19 years | 95+ years | Data Rich  | 1         | 2     | Cholesterol (total, mean per capita)     | --              |
| Non-rheumatic calcific aortic valve disease     | Female | 15-19 years | 95+ years | Data Rich  | 1         | 2     | Diabetes Fasting Plasma Glucose (mmol/L) | --              |
| Non-rheumatic calcific aortic valve disease     | Female | 15-19 years | 95+ years | Data Rich  | -1        | 3     | LDI (IS per capita)                      | --              |
| Non-rheumatic calcific aortic valve disease     | Female | 15-19 years | 95+ years | Data Rich  | 0         | 3     | Socio-demographic Index                  | 463             |
| Non-rheumatic calcific aortic valve disease     | Female | 15-19 years | 95+ years | Data Rich  | 0         | 3     | Alcohol (liters per capita)              | 596             |
| Non-rheumatic calcific aortic valve disease     | Female | 15-19 years | 95+ years | Global     | 1         | 1     | Mean BMI                                 | 513             |
| Non-rheumatic calcific aortic valve disease     | Female | 15-19 years | 95+ years | Global     | 1         | 1     | Smoking Prevalence                       | 513             |
| Non-rheumatic calcific aortic valve disease     | Female | 15-19 years | 95+ years | Global     | 1         | 1     | Systolic Blood Pressure (mmHg)           | --              |
| Non-rheumatic calcific aortic valve disease     | Female | 15-19 years | 95+ years | Global     | -1        | 2     | Healthcare access and quality index      | --              |
| Non-rheumatic calcific aortic valve disease     | Female | 15-19 years | 95+ years | Global     | 1         | 2     | Diabetes Fasting Plasma Glucose (mmol/L) | 334             |
| Non-rheumatic calcific aortic valve disease     | Female | 15-19 years | 95+ years | Global     | 1         | 2     | Cholesterol (total, mean per capita)     | --              |
| Non-rheumatic calcific aortic valve disease     | Female | 15-19 years | 95+ years | Global     | -1        | 3     | LDI (IS per capita)                      | --              |
| Non-rheumatic calcific aortic valve disease     | Female | 15-19 years | 95+ years | Global     | 0         | 3     | Socio-demographic Index                  | 282             |
| Non-rheumatic calcific aortic valve disease     | Female | 15-19 years | 95+ years | Global     | 0         | 3     | Alcohol (liters per capita)              | 628             |
| Non-rheumatic calcific aortic valve disease     | Male   | 15-19 years | 95+ years | Data Rich  | 1         | 1     | Smoking Prevalence                       | 278             |
| Non-rheumatic calcific aortic valve disease     | Male   | 15-19 years | 95+ years | Data Rich  | 1         | 1     | Mean BMI                                 | 1000            |
| Non-rheumatic calcific aortic valve disease     | Male   | 15-19 years | 95+ years | Data Rich  | 1         | 1     | Systolic Blood Pressure (mmHg)           | --              |
| Non-rheumatic calcific aortic valve disease     | Male   | 15-19 years | 95+ years | Data Rich  | -1        | 2     | Healthcare access and quality index      | --              |
| Non-rheumatic calcific aortic valve disease     | Male   | 15-19 years | 95+ years | Data Rich  | 1         | 2     | Cholesterol (total, mean per capita)     | --              |
| Non-rheumatic calcific aortic valve disease     | Male   | 15-19 years | 95+ years | Data Rich  | 1         | 2     | Diabetes Fasting Plasma Glucose (mmol/L) | --              |
| Non-rheumatic calcific aortic valve disease     | Male   | 15-19 years | 95+ years | Data Rich  | -1        | 3     | LDI (IS per capita)                      | --              |
| Non-rheumatic calcific aortic valve disease     | Male   | 15-19 years | 95+ years | Data Rich  | 0         | 3     | Socio-demographic Index                  | 317             |
| Non-rheumatic calcific aortic valve disease     | Male   | 15-19 years | 95+ years | Data Rich  | 0         | 3     | Alcohol (liters per capita)              | 572             |
| Non-rheumatic calcific aortic valve disease     | Male   | 15-19 years | 95+ years | Global     | 1         | 1     | Smoking Prevalence                       | 278             |
| Non-rheumatic calcific aortic valve disease     | Male   | 15-19 years | 95+ years | Global     | 1         | 1     | Mean BMI                                 | 1000            |
| Non-rheumatic calcific aortic valve disease     | Male   | 15-19 years | 95+ years | Global     | 1         | 1     | Systolic Blood Pressure (mmHg)           | --              |
| Non-rheumatic calcific aortic valve disease     | Male   | 15-19 years | 95+ years | Global     | -1        | 2     | Healthcare access and quality index      | --              |
| Non-rheumatic calcific aortic valve disease     | Male   | 15-19 years | 95+ years | Global     | 1         | 2     | Cholesterol (total, mean per capita)     | --              |
| Non-rheumatic calcific aortic valve disease     | Male   | 15-19 years | 95+ years | Global     | 1         | 2     | Diabetes Fasting Plasma Glucose (mmol/L) | --              |
| Non-rheumatic calcific aortic valve disease     | Male   | 15-19 years | 95+ years | Global     | -1        | 3     | LDI (IS per capita)                      | --              |
| Non-rheumatic calcific aortic valve disease     | Male   | 15-19 years | 95+ years | Global     | 0         | 3     | Alcohol (liters per capita)              | 572             |
| Non-rheumatic calcific aortic valve disease     | Male   | 15-19 years | 95+ years | Global     | 0         | 3     | Socio-demographic Index                  | 572             |
| Non-rheumatic degenerative mitral valve disease | Female | 15-19 years | 95+ years | Data Rich  | -1        | 1     | Healthcare access and quality index      | 557             |
| Non-rheumatic degenerative mitral valve disease | Female | 15-19 years | 95+ years | Data Rich  | 0         | 1     | Socio-demographic Index                  | 619             |
| Non-rheumatic degenerative mitral valve disease | Female | 15-19 years | 95+ years | Data Rich  | 0         | 1     | LDI (IS per capita)                      | --              |
| Non-rheumatic degenerative mitral valve disease | Female | 15-19 years | 95+ years | Global     | -1        | 1     | Healthcare access and quality index      | 445             |
| Non-rheumatic degenerative mitral valve disease | Female | 15-19 years | 95+ years | Global     | 0         | 1     | Socio-demographic Index                  | 533             |
| Non-rheumatic degenerative mitral valve disease | Female | 15-19 years | 95+ years | Global     | 0         | 1     | LDI (IS per capita)                      | --              |
| Non-rheumatic degenerative mitral valve disease | Male   | 15-19 years | 95+ years | Data Rich  | -1        | 1     | Healthcare access and quality index      | 600             |
| Non-rheumatic degenerative mitral valve disease | Male   | 15-19 years | 95+ years | Data Rich  | 0         | 1     | Socio-demographic Index                  | 410             |
| Non-rheumatic degenerative mitral valve disease | Male   | 15-19 years | 95+ years | Data Rich  | 0         | 1     | LDI (IS per capita)                      | --              |
| Non-rheumatic degenerative mitral valve disease | Male   | 15-19 years | 95+ years | Global     | -1        | 1     | Healthcare access and quality index      | 443             |
| Non-rheumatic degenerative mitral valve disease | Male   | 15-19 years | 95+ years | Global     | 0         | 1     | Socio-demographic Index                  | 621             |
| Non-rheumatic degenerative mitral valve disease | Male   | 15-19 years | 95+ years | Global     | 0         | 1     | LDI (IS per capita)                      | --              |
| Other non-rheumatic valve diseases              | Female | 15-19 years | 95+ years | Data Rich  | 1         | 1     | Log-transformed SEV scalar: CVD          | 1000            |
| Other non-rheumatic valve diseases              | Female | 15-19 years | 95+ years | Global     | 1         | 1     | Log-transformed SEV scalar: CVD          | 1000            |
| Other non-rheumatic valve diseases              | Male   | 15-19 years | 95+ years | Data Rich  | 1         | 1     | Log-transformed SEV scalar: CVD          | 1000            |
| Other non-rheumatic valve diseases              | Male   | 15-19 years | 95+ years | Global     | 1         | 1     | Log-transformed SEV scalar: CVD          | 1000            |
| Cardiomyopathy and myocarditis                  | Female | 0-6 days    | 95+ years | Data Rich  | 1         | 1     | Smoking Prevalence                       | 193             |
| Cardiomyopathy and myocarditis                  | Female | 0-6 days    | 95+ years | Data Rich  | 1         | 1     | Log-transformed SEV scalar: CMP          | 223             |
| Cardiomyopathy and myocarditis                  | Female | 0-6 days    | 95+ years | Data Rich  | 1         | 1     | Systolic Blood Pressure (mmHg)           | 449             |
| Cardiomyopathy and myocarditis                  | Female | 0-6 days    | 95+ years | Data Rich  | -1        | 2     | Healthcare access and quality index      | 314             |
| Cardiomyopathy and myocarditis                  | Female | 0-6 days    | 95+ years | Data Rich  | 1         | 2     | Mean BMI                                 | 422             |
| Cardiomyopathy and myocarditis                  | Female | 0-6 days    | 95+ years | Data Rich  | 0         | 3     | Socio-demographic Index                  | 438             |
| Cardiomyopathy and myocarditis                  | Female | 0-6 days    | 95+ years | Data Rich  | 0         | 3     | Alcohol (liters per capita)              | 467             |
| Cardiomyopathy and myocarditis                  | Female | 0-6 days    | 95+ years | Data Rich  | 0         | 3     | LDI (IS per capita)                      | --              |
| Cardiomyopathy and myocarditis                  | Female | 0-6 days    | 95+ years | Global     | 0         | 1     | Log-transformed SEV scalar: CMP          | 644             |
| Cardiomyopathy and myocarditis                  | Female | 0-6 days    | 95+ years | Global     | 0         | 1     | Smoking Prevalence                       | 755             |
| Cardiomyopathy and myocarditis                  | Female | 0-6 days    | 95+ years | Global     | 0         | 1     | Systolic Blood Pressure (mmHg)           | 783             |
| Cardiomyopathy and myocarditis                  | Female | 0-6 days    | 95+ years | Global     | -1        | 2     | Healthcare access and quality index      | 49              |
| Cardiomyopathy and myocarditis                  | Female | 0-6 days    | 95+ years | Global     | 1         | 2     | Mean BMI                                 | 554             |
| Cardiomyopathy and myocarditis                  | Female | 0-6 days    | 95+ years | Global     | 0         | 3     | Socio-demographic Index                  | 78              |
| Cardiomyopathy and myocarditis                  | Female | 0-6 days    | 95+ years | Global     | 0         | 3     | Alcohol (liters per capita)              | 253             |
| Cardiomyopathy and myocarditis                  | Female | 0-6 days    | 95+ years | Global     | 0         | 3     | LDI (IS per capita)                      | --              |
| Cardiomyopathy and myocarditis                  | Male   | 0-6 days    | 95+ years | Data Rich  | 1         | 1     | Smoking Prevalence                       | 208             |
| Cardiomyopathy and myocarditis                  | Male   | 0-6 days    | 95+ years | Data Rich  | 1         | 1     | Systolic Blood Pressure (mmHg)           | 298             |
| Cardiomyopathy and myocarditis                  | Male   | 0-6 days    | 95+ years | Data Rich  | 1         | 1     | Log-transformed SEV scalar: CMP          | --              |
| Cardiomyopathy and myocarditis                  | Male   | 0-6 days    | 95+ years | Data Rich  | -1        | 2     | Healthcare access and quality index      | --              |
| Cardiomyopathy and myocarditis                  | Male   | 0-6 days    | 95+ years | Data Rich  | 1         | 2     | Mean BMI                                 | 600             |
| Cardiomyopathy and myocarditis                  | Male   | 0-6 days    | 95+ years | Data Rich  | 0         | 3     | Socio-demographic Index                  | 527             |
| Cardiomyopathy and myocarditis                  | Male   | 0-6 days    | 95+ years | Data Rich  | 0         | 3     | Alcohol (liters per capita)              | 705             |

**Appendix Table 9: CODEm covariates used, level of covariate, and expected direction of covariate by cause, sex, and age**

*Covariates that CODEm did not select during the covariate selection process have no draw counts listed.*

| Cause                          | Sex    | Age Start   | Age End   | Model Type | Direction | Level | Covariate Name                      | Number of Draws |
|--------------------------------|--------|-------------|-----------|------------|-----------|-------|-------------------------------------|-----------------|
| Cardiomyopathy and myocarditis | Male   | 0-6 days    | 95+ years | Data Rich  | 0         | 3     | LDI (IS per capita)                 | --              |
| Cardiomyopathy and myocarditis | Male   | 0-6 days    | 95+ years | Global     | 1         | 1     | Smoking Prevalence                  | 187             |
| Cardiomyopathy and myocarditis | Male   | 0-6 days    | 95+ years | Global     | 1         | 1     | Systolic Blood Pressure (mmHg)      | 424             |
| Cardiomyopathy and myocarditis | Male   | 0-6 days    | 95+ years | Global     | 1         | 1     | Log-transformed SEV scalar: CMP     | --              |
| Cardiomyopathy and myocarditis | Male   | 0-6 days    | 95+ years | Global     | -1        | 2     | Healthcare access and quality index | 273             |
| Cardiomyopathy and myocarditis | Male   | 0-6 days    | 95+ years | Global     | 1         | 2     | Mean BMI                            | 265             |
| Cardiomyopathy and myocarditis | Male   | 0-6 days    | 95+ years | Global     | 0         | 3     | Alcohol (liters per capita)         | 487             |
| Cardiomyopathy and myocarditis | Male   | 0-6 days    | 95+ years | Global     | 0         | 3     | Socio-demographic Index             | 636             |
| Cardiomyopathy and myocarditis | Male   | 0-6 days    | 95+ years | Global     | 0         | 3     | LDI (IS per capita)                 | --              |
| Myocarditis                    | Female | 0-6 days    | 95+ years | Data Rich  | 1         | 1     | Log-transformed SEV scalar: CMP     | --              |
| Myocarditis                    | Female | 0-6 days    | 95+ years | Data Rich  | 1         | 1     | Systolic Blood Pressure (mmHg)      | --              |
| Myocarditis                    | Female | 0-6 days    | 95+ years | Data Rich  | -1        | 2     | Healthcare access and quality index | 489             |
| Myocarditis                    | Female | 0-6 days    | 95+ years | Data Rich  | -1        | 3     | LDI (IS per capita)                 | --              |
| Myocarditis                    | Female | 0-6 days    | 95+ years | Data Rich  | 0         | 3     | Socio-demographic Index             | 778             |
| Myocarditis                    | Female | 0-6 days    | 95+ years | Global     | 1         | 1     | Log-transformed SEV scalar: CMP     | --              |
| Myocarditis                    | Female | 0-6 days    | 95+ years | Global     | 1         | 1     | Systolic Blood Pressure (mmHg)      | --              |
| Myocarditis                    | Female | 0-6 days    | 95+ years | Global     | -1        | 2     | Healthcare access and quality index | 424             |
| Myocarditis                    | Female | 0-6 days    | 95+ years | Global     | -1        | 3     | LDI (IS per capita)                 | --              |
| Myocarditis                    | Female | 0-6 days    | 95+ years | Global     | 0         | 3     | Socio-demographic Index             | 674             |
| Myocarditis                    | Male   | 0-6 days    | 95+ years | Data Rich  | 1         | 1     | Log-transformed SEV scalar: CMP     | --              |
| Myocarditis                    | Male   | 0-6 days    | 95+ years | Data Rich  | 1         | 1     | Systolic Blood Pressure (mmHg)      | --              |
| Myocarditis                    | Male   | 0-6 days    | 95+ years | Data Rich  | -1        | 2     | Healthcare access and quality index | --              |
| Myocarditis                    | Male   | 0-6 days    | 95+ years | Data Rich  | -1        | 3     | LDI (IS per capita)                 | --              |
| Myocarditis                    | Male   | 0-6 days    | 95+ years | Data Rich  | 0         | 3     | Socio-demographic Index             | 1000            |
| Myocarditis                    | Male   | 0-6 days    | 95+ years | Global     | 1         | 1     | Log-transformed SEV scalar: CMP     | --              |
| Myocarditis                    | Male   | 0-6 days    | 95+ years | Global     | 1         | 1     | Systolic Blood Pressure (mmHg)      | --              |
| Myocarditis                    | Male   | 0-6 days    | 95+ years | Global     | -1        | 2     | Healthcare access and quality index | 489             |
| Myocarditis                    | Male   | 0-6 days    | 95+ years | Global     | -1        | 3     | LDI (IS per capita)                 | --              |
| Myocarditis                    | Male   | 0-6 days    | 95+ years | Global     | 0         | 3     | Socio-demographic Index             | 778             |
| Alcoholic cardiomyopathy       | Female | 15-19 years | 95+ years | Data Rich  | 1         | 1     | Smoking Prevalence                  | 182             |
| Alcoholic cardiomyopathy       | Female | 15-19 years | 95+ years | Data Rich  | 1         | 1     | Alcohol (liters per capita)         | 899             |
| Alcoholic cardiomyopathy       | Female | 15-19 years | 95+ years | Data Rich  | 1         | 1     | Log-transformed SEV scalar: CMP     | 927             |
| Alcoholic cardiomyopathy       | Female | 15-19 years | 95+ years | Data Rich  | -1        | 2     | Healthcare access and quality index | 193             |
| Alcoholic cardiomyopathy       | Female | 15-19 years | 95+ years | Data Rich  | -1        | 3     | LDI (IS per capita)                 | --              |
| Alcoholic cardiomyopathy       | Female | 15-19 years | 95+ years | Data Rich  | 0         | 3     | Socio-demographic Index             | 168             |
| Alcoholic cardiomyopathy       | Female | 15-19 years | 95+ years | Global     | 1         | 1     | Smoking Prevalence                  | 453             |
| Alcoholic cardiomyopathy       | Female | 15-19 years | 95+ years | Global     | 1         | 1     | Alcohol (liters per capita)         | 605             |
| Alcoholic cardiomyopathy       | Female | 15-19 years | 95+ years | Global     | 1         | 1     | Log-transformed SEV scalar: CMP     | 997             |
| Alcoholic cardiomyopathy       | Female | 15-19 years | 95+ years | Global     | -1        | 2     | Healthcare access and quality index | 169             |
| Alcoholic cardiomyopathy       | Female | 15-19 years | 95+ years | Global     | -1        | 3     | LDI (IS per capita)                 | --              |
| Alcoholic cardiomyopathy       | Female | 15-19 years | 95+ years | Global     | 0         | 3     | Socio-demographic Index             | 204             |
| Alcoholic cardiomyopathy       | Male   | 15-19 years | 95+ years | Data Rich  | 1         | 1     | Smoking Prevalence                  | 84              |
| Alcoholic cardiomyopathy       | Male   | 15-19 years | 95+ years | Data Rich  | 1         | 1     | Alcohol (liters per capita)         | 648             |
| Alcoholic cardiomyopathy       | Male   | 15-19 years | 95+ years | Data Rich  | 1         | 1     | Log-transformed SEV scalar: CMP     | 750             |
| Alcoholic cardiomyopathy       | Male   | 15-19 years | 95+ years | Data Rich  | -1        | 2     | Healthcare access and quality index | --              |
| Alcoholic cardiomyopathy       | Male   | 15-19 years | 95+ years | Data Rich  | -1        | 3     | LDI (IS per capita)                 | --              |
| Alcoholic cardiomyopathy       | Male   | 15-19 years | 95+ years | Data Rich  | 0         | 3     | Socio-demographic Index             | 714             |
| Alcoholic cardiomyopathy       | Male   | 15-19 years | 95+ years | Global     | 1         | 1     | Smoking Prevalence                  | 186             |
| Alcoholic cardiomyopathy       | Male   | 15-19 years | 95+ years | Global     | 1         | 1     | Alcohol (liters per capita)         | 378             |
| Alcoholic cardiomyopathy       | Male   | 15-19 years | 95+ years | Global     | 1         | 1     | Log-transformed SEV scalar: CMP     | 931             |
| Alcoholic cardiomyopathy       | Male   | 15-19 years | 95+ years | Global     | -1        | 2     | Healthcare access and quality index | 50              |
| Alcoholic cardiomyopathy       | Male   | 15-19 years | 95+ years | Global     | -1        | 3     | LDI (IS per capita)                 | --              |
| Alcoholic cardiomyopathy       | Male   | 15-19 years | 95+ years | Global     | 0         | 3     | Socio-demographic Index             | 623             |
| Other cardiomyopathy           | Female | 0-6 days    | 95+ years | Data Rich  | 1         | 1     | Smoking Prevalence                  | 316             |
| Other cardiomyopathy           | Female | 0-6 days    | 95+ years | Data Rich  | 1         | 1     | Systolic Blood Pressure (mmHg)      | 334             |
| Other cardiomyopathy           | Female | 0-6 days    | 95+ years | Data Rich  | 1         | 1     | Log-transformed SEV scalar: CMP     | --              |
| Other cardiomyopathy           | Female | 0-6 days    | 95+ years | Data Rich  | -1        | 2     | Healthcare access and quality index | --              |
| Other cardiomyopathy           | Female | 0-6 days    | 95+ years | Data Rich  | 1         | 2     | Mean BMI                            | 426             |
| Other cardiomyopathy           | Female | 0-6 days    | 95+ years | Data Rich  | 0         | 3     | Socio-demographic Index             | 634             |
| Other cardiomyopathy           | Female | 0-6 days    | 95+ years | Data Rich  | 0         | 3     | LDI (IS per capita)                 | --              |
| Other cardiomyopathy           | Female | 0-6 days    | 95+ years | Global     | 1         | 1     | Smoking Prevalence                  | 718             |
| Other cardiomyopathy           | Female | 0-6 days    | 95+ years | Global     | 1         | 1     | Systolic Blood Pressure (mmHg)      | 718             |
| Other cardiomyopathy           | Female | 0-6 days    | 95+ years | Global     | 1         | 1     | Log-transformed SEV scalar: CMP     | --              |
| Other cardiomyopathy           | Female | 0-6 days    | 95+ years | Global     | -1        | 2     | Healthcare access and quality index | --              |
| Other cardiomyopathy           | Female | 0-6 days    | 95+ years | Global     | 1         | 2     | Mean BMI                            | 364             |
| Other cardiomyopathy           | Female | 0-6 days    | 95+ years | Global     | 0         | 3     | Socio-demographic Index             | 585             |
| Other cardiomyopathy           | Female | 0-6 days    | 95+ years | Global     | 0         | 3     | LDI (IS per capita)                 | --              |
| Other cardiomyopathy           | Male   | 0-6 days    | 95+ years | Data Rich  | 1         | 1     | Systolic Blood Pressure (mmHg)      | 364             |
| Other cardiomyopathy           | Male   | 0-6 days    | 95+ years | Data Rich  | 1         | 1     | Log-transformed SEV scalar: CMP     | --              |
| Other cardiomyopathy           | Male   | 0-6 days    | 95+ years | Data Rich  | 1         | 1     | Smoking Prevalence                  | --              |
| Other cardiomyopathy           | Male   | 0-6 days    | 95+ years | Data Rich  | -1        | 2     | Healthcare access and quality index | --              |
| Other cardiomyopathy           | Male   | 0-6 days    | 95+ years | Data Rich  | 1         | 2     | Mean BMI                            | 692             |
| Other cardiomyopathy           | Male   | 0-6 days    | 95+ years | Data Rich  | 0         | 3     | Socio-demographic Index             | 463             |
| Other cardiomyopathy           | Male   | 0-6 days    | 95+ years | Data Rich  | 0         | 3     | LDI (IS per capita)                 | --              |
| Other cardiomyopathy           | Male   | 0-6 days    | 95+ years | Global     | 1         | 1     | Systolic Blood Pressure (mmHg)      | 364             |
| Other cardiomyopathy           | Male   | 0-6 days    | 95+ years | Global     | 1         | 1     | Log-transformed SEV scalar: CMP     | --              |
| Other cardiomyopathy           | Male   | 0-6 days    | 95+ years | Global     | 1         | 1     | Smoking Prevalence                  | --              |
| Other cardiomyopathy           | Male   | 0-6 days    | 95+ years | Global     | -1        | 2     | Healthcare access and quality index | --              |



**Appendix Table 9: CODEm covariates used, level of covariate, and expected direction of covariate by cause, sex, and age**  
*Covariates that CODEm did not select during the covariate selection process have no draw counts listed.*

| Cause                           | Sex    | Age Start   | Age End   | Model Type | Direction | Level | Covariate Name                           | Number of Draws |
|---------------------------------|--------|-------------|-----------|------------|-----------|-------|------------------------------------------|-----------------|
| Other cardiomyopathy            | Male   | 0-6 days    | 95+ years | Global     | 1         | 2     | Mean BMI                                 | 523             |
| Other cardiomyopathy            | Male   | 0-6 days    | 95+ years | Global     | 0         | 3     | Socio-demographic Index                  | 607             |
| Other cardiomyopathy            | Male   | 0-6 days    | 95+ years | Global     | 0         | 3     | LDI (I\$ per capita)                     | --              |
| Atrial fibrillation and flutter | Female | 30-34 years | 95+ years | Data Rich  | 1         | 1     | Smoking Prevalence                       | 633             |
| Atrial fibrillation and flutter | Female | 30-34 years | 95+ years | Data Rich  | 1         | 1     | Log-transformed SEV scalar: A Fib        | 762             |
| Atrial fibrillation and flutter | Female | 30-34 years | 95+ years | Data Rich  | 1         | 1     | Systolic Blood Pressure (mmHg)           | --              |
| Atrial fibrillation and flutter | Female | 30-34 years | 95+ years | Data Rich  | -1        | 2     | Healthcare access and quality index      | --              |
| Atrial fibrillation and flutter | Female | 30-34 years | 95+ years | Data Rich  | 1         | 2     | Mean BMI                                 | 334             |
| Atrial fibrillation and flutter | Female | 30-34 years | 95+ years | Data Rich  | 1         | 2     | Diabetes Fasting Plasma Glucose (mmol/L) | 361             |
| Atrial fibrillation and flutter | Female | 30-34 years | 95+ years | Data Rich  | 1         | 2     | Cholesterol (total, mean per capita)     | --              |
| Atrial fibrillation and flutter | Female | 30-34 years | 95+ years | Data Rich  | -1        | 3     | vegetables adjusted(g)                   | 7               |
| Atrial fibrillation and flutter | Female | 30-34 years | 95+ years | Data Rich  | -1        | 3     | nuts seeds adjusted(g)                   | 46              |
| Atrial fibrillation and flutter | Female | 30-34 years | 95+ years | Data Rich  | -1        | 3     | pulses legumes adjusted(g)               | 194             |
| Atrial fibrillation and flutter | Female | 30-34 years | 95+ years | Data Rich  | -1        | 3     | LDI (I\$ per capita)                     | --              |
| Atrial fibrillation and flutter | Female | 30-34 years | 95+ years | Data Rich  | -1        | 3     | fruits adjusted(g)                       | --              |
| Atrial fibrillation and flutter | Female | 30-34 years | 95+ years | Data Rich  | -1        | 3     | omega 3 adjusted(g)                      | --              |
| Atrial fibrillation and flutter | Female | 30-34 years | 95+ years | Data Rich  | -1        | 3     | pufa adjusted(percent)                   | --              |
| Atrial fibrillation and flutter | Female | 30-34 years | 95+ years | Data Rich  | 0         | 3     | Alcohol (liters per capita)              | 279             |
| Atrial fibrillation and flutter | Female | 30-34 years | 95+ years | Data Rich  | 0         | 3     | Socio-demographic Index                  | 410             |
| Atrial fibrillation and flutter | Female | 30-34 years | 95+ years | Data Rich  | 1         | 3     | Diet high in trans fatty acids           | 96              |
| Atrial fibrillation and flutter | Female | 30-34 years | 95+ years | Global     | 1         | 1     | Smoking Prevalence                       | 485             |
| Atrial fibrillation and flutter | Female | 30-34 years | 95+ years | Global     | 1         | 1     | Log-transformed SEV scalar: A Fib        | 583             |
| Atrial fibrillation and flutter | Female | 30-34 years | 95+ years | Global     | 1         | 1     | Systolic Blood Pressure (mmHg)           | --              |
| Atrial fibrillation and flutter | Female | 30-34 years | 95+ years | Global     | -1        | 2     | Healthcare access and quality index      | 378             |
| Atrial fibrillation and flutter | Female | 30-34 years | 95+ years | Global     | 1         | 2     | Mean BMI                                 | 250             |
| Atrial fibrillation and flutter | Female | 30-34 years | 95+ years | Global     | 1         | 2     | Diabetes Fasting Plasma Glucose (mmol/L) | 378             |
| Atrial fibrillation and flutter | Female | 30-34 years | 95+ years | Global     | 1         | 2     | Cholesterol (total, mean per capita)     | --              |
| Atrial fibrillation and flutter | Female | 30-34 years | 95+ years | Global     | -1        | 3     | vegetables adjusted(g)                   | 100             |
| Atrial fibrillation and flutter | Female | 30-34 years | 95+ years | Global     | -1        | 3     | pulses legumes adjusted(g)               | 189             |
| Atrial fibrillation and flutter | Female | 30-34 years | 95+ years | Global     | -1        | 3     | LDI (I\$ per capita)                     | --              |
| Atrial fibrillation and flutter | Female | 30-34 years | 95+ years | Global     | -1        | 3     | fruits adjusted(g)                       | --              |
| Atrial fibrillation and flutter | Female | 30-34 years | 95+ years | Global     | -1        | 3     | nuts seeds adjusted(g)                   | --              |
| Atrial fibrillation and flutter | Female | 30-34 years | 95+ years | Global     | -1        | 3     | omega 3 adjusted(g)                      | --              |
| Atrial fibrillation and flutter | Female | 30-34 years | 95+ years | Global     | -1        | 3     | pufa adjusted(percent)                   | --              |
| Atrial fibrillation and flutter | Female | 30-34 years | 95+ years | Global     | 0         | 3     | Alcohol (liters per capita)              | 316             |
| Atrial fibrillation and flutter | Female | 30-34 years | 95+ years | Global     | 0         | 3     | Socio-demographic Index                  | 487             |
| Atrial fibrillation and flutter | Female | 30-34 years | 95+ years | Global     | 1         | 3     | Diet high in trans fatty acids           | 67              |
| Atrial fibrillation and flutter | Male   | 30-34 years | 95+ years | Data Rich  | 1         | 1     | Log-transformed SEV scalar: A Fib        | --              |
| Atrial fibrillation and flutter | Male   | 30-34 years | 95+ years | Data Rich  | 1         | 1     | Smoking Prevalence                       | --              |
| Atrial fibrillation and flutter | Male   | 30-34 years | 95+ years | Data Rich  | 1         | 1     | Systolic Blood Pressure (mmHg)           | --              |
| Atrial fibrillation and flutter | Male   | 30-34 years | 95+ years | Data Rich  | -1        | 2     | Healthcare access and quality index      | --              |
| Atrial fibrillation and flutter | Male   | 30-34 years | 95+ years | Data Rich  | 1         | 2     | Diabetes Fasting Plasma Glucose (mmol/L) | 244             |
| Atrial fibrillation and flutter | Male   | 30-34 years | 95+ years | Data Rich  | 1         | 2     | Mean BMI                                 | 428             |
| Atrial fibrillation and flutter | Male   | 30-34 years | 95+ years | Data Rich  | 1         | 2     | Cholesterol (total, mean per capita)     | --              |
| Atrial fibrillation and flutter | Male   | 30-34 years | 95+ years | Data Rich  | -1        | 3     | pulses legumes adjusted(g)               | 192             |
| Atrial fibrillation and flutter | Male   | 30-34 years | 95+ years | Data Rich  | -1        | 3     | LDI (I\$ per capita)                     | --              |
| Atrial fibrillation and flutter | Male   | 30-34 years | 95+ years | Data Rich  | -1        | 3     | fruits adjusted(g)                       | --              |
| Atrial fibrillation and flutter | Male   | 30-34 years | 95+ years | Data Rich  | -1        | 3     | nuts seeds adjusted(g)                   | --              |
| Atrial fibrillation and flutter | Male   | 30-34 years | 95+ years | Data Rich  | -1        | 3     | omega 3 adjusted(g)                      | --              |
| Atrial fibrillation and flutter | Male   | 30-34 years | 95+ years | Data Rich  | -1        | 3     | pufa adjusted(percent)                   | --              |
| Atrial fibrillation and flutter | Male   | 30-34 years | 95+ years | Data Rich  | -1        | 3     | vegetables adjusted(g)                   | --              |
| Atrial fibrillation and flutter | Male   | 30-34 years | 95+ years | Data Rich  | 0         | 3     | Socio-demographic Index                  | 160             |
| Atrial fibrillation and flutter | Male   | 30-34 years | 95+ years | Data Rich  | 0         | 3     | Alcohol (liters per capita)              | 680             |
| Atrial fibrillation and flutter | Male   | 30-34 years | 95+ years | Data Rich  | 1         | 3     | Diet high in trans fatty acids           | 444             |
| Atrial fibrillation and flutter | Male   | 30-34 years | 95+ years | Global     | 1         | 1     | Log-transformed SEV scalar: A Fib        | --              |
| Atrial fibrillation and flutter | Male   | 30-34 years | 95+ years | Global     | 1         | 1     | Smoking Prevalence                       | --              |
| Atrial fibrillation and flutter | Male   | 30-34 years | 95+ years | Global     | 1         | 1     | Systolic Blood Pressure (mmHg)           | --              |
| Atrial fibrillation and flutter | Male   | 30-34 years | 95+ years | Global     | -1        | 2     | Healthcare access and quality index      | --              |
| Atrial fibrillation and flutter | Male   | 30-34 years | 95+ years | Global     | 1         | 2     | Diabetes Fasting Plasma Glucose (mmol/L) | 428             |
| Atrial fibrillation and flutter | Male   | 30-34 years | 95+ years | Global     | 1         | 2     | Mean BMI                                 | 757             |
| Atrial fibrillation and flutter | Male   | 30-34 years | 95+ years | Global     | 1         | 2     | Cholesterol (total, mean per capita)     | --              |
| Atrial fibrillation and flutter | Male   | 30-34 years | 95+ years | Global     | -1        | 3     | pulses legumes adjusted(g)               | 36              |
| Atrial fibrillation and flutter | Male   | 30-34 years | 95+ years | Global     | -1        | 3     | LDI (I\$ per capita)                     | --              |
| Atrial fibrillation and flutter | Male   | 30-34 years | 95+ years | Global     | -1        | 3     | fruits adjusted(g)                       | --              |
| Atrial fibrillation and flutter | Male   | 30-34 years | 95+ years | Global     | -1        | 3     | nuts seeds adjusted(g)                   | --              |
| Atrial fibrillation and flutter | Male   | 30-34 years | 95+ years | Global     | -1        | 3     | omega 3 adjusted(g)                      | --              |
| Atrial fibrillation and flutter | Male   | 30-34 years | 95+ years | Global     | -1        | 3     | pufa adjusted(percent)                   | --              |
| Atrial fibrillation and flutter | Male   | 30-34 years | 95+ years | Global     | -1        | 3     | vegetables adjusted(g)                   | --              |
| Atrial fibrillation and flutter | Male   | 30-34 years | 95+ years | Global     | 0         | 3     | Socio-demographic Index                  | 177             |
| Atrial fibrillation and flutter | Male   | 30-34 years | 95+ years | Global     | 0         | 3     | Alcohol (liters per capita)              | 691             |
| Atrial fibrillation and flutter | Male   | 30-34 years | 95+ years | Global     | 1         | 3     | Diet high in trans fatty acids           | 36              |
| Aortic aneurysm                 | Female | 15-19 years | 95+ years | Data Rich  | 1         | 1     | Systolic Blood Pressure (mmHg)           | 65              |
| Aortic aneurysm                 | Female | 15-19 years | 95+ years | Data Rich  | 1         | 1     | Cumulative Cigarettes (10 Years)         | 272             |
| Aortic aneurysm                 | Female | 15-19 years | 95+ years | Data Rich  | 1         | 1     | Cholesterol (total, mean per capita)     | 602             |
| Aortic aneurysm                 | Female | 15-19 years | 95+ years | Data Rich  | 1         | 1     | Log-transformed SEV scalar: Aort An      | 664             |
| Aortic aneurysm                 | Female | 15-19 years | 95+ years | Data Rich  | -1        | 2     | Healthcare access and quality index      | --              |
| Aortic aneurysm                 | Female | 15-19 years | 95+ years | Data Rich  | 1         | 2     | Mean BMI                                 | 187             |
| Aortic aneurysm                 | Female | 15-19 years | 95+ years | Data Rich  | -1        | 3     | nuts seeds adjusted(g)                   | 1               |



**Appendix Table 9: CODEm covariates used, level of covariate, and expected direction of covariate by cause, sex, and age**  
*Covariates that CODEm did not select during the covariate selection process have no draw counts listed.*

| Cause                       | Sex    | Age Start   | Age End   | Model Type | Direction | Level | Covariate Name                           | Number of Draws |
|-----------------------------|--------|-------------|-----------|------------|-----------|-------|------------------------------------------|-----------------|
| Aortic aneurysm             | Female | 15-19 years | 95+ years | Data Rich  | -1        | 3     | vegetables adjusted(g)                   | 1               |
| Aortic aneurysm             | Female | 15-19 years | 95+ years | Data Rich  | -1        | 3     | pulses legumes adjusted(g)               | 66              |
| Aortic aneurysm             | Female | 15-19 years | 95+ years | Data Rich  | -1        | 3     | LDI (1\$ per capita)                     | --              |
| Aortic aneurysm             | Female | 15-19 years | 95+ years | Data Rich  | -1        | 3     | fruits adjusted(g)                       | --              |
| Aortic aneurysm             | Female | 15-19 years | 95+ years | Data Rich  | -1        | 3     | omega 3 adjusted(g)                      | --              |
| Aortic aneurysm             | Female | 15-19 years | 95+ years | Data Rich  | -1        | 3     | pufa adjusted(percent)                   | --              |
| Aortic aneurysm             | Female | 15-19 years | 95+ years | Data Rich  | 0         | 3     | Socio-demographic Index                  | 685             |
| Aortic aneurysm             | Female | 15-19 years | 95+ years | Data Rich  | 0         | 3     | Alcohol (liters per capita)              | 871             |
| Aortic aneurysm             | Female | 15-19 years | 95+ years | Global     | 1         | 1     | Systolic Blood Pressure (mmHg)           | 113             |
| Aortic aneurysm             | Female | 15-19 years | 95+ years | Global     | 1         | 1     | Cumulative Cigarettes (10 Years)         | 198             |
| Aortic aneurysm             | Female | 15-19 years | 95+ years | Global     | 1         | 1     | Log-transformed SEV scalar: Aort An      | 213             |
| Aortic aneurysm             | Female | 15-19 years | 95+ years | Global     | 1         | 1     | Cholesterol (total, mean per capita)     | 795             |
| Aortic aneurysm             | Female | 15-19 years | 95+ years | Global     | -1        | 2     | Healthcare access and quality index      | 39              |
| Aortic aneurysm             | Female | 15-19 years | 95+ years | Global     | 1         | 2     | Mean BMI                                 | 253             |
| Aortic aneurysm             | Female | 15-19 years | 95+ years | Global     | -1        | 3     | nuts seeds adjusted(g)                   | 33              |
| Aortic aneurysm             | Female | 15-19 years | 95+ years | Global     | -1        | 3     | pulses legumes adjusted(g)               | 96              |
| Aortic aneurysm             | Female | 15-19 years | 95+ years | Global     | -1        | 3     | vegetables adjusted(g)                   | 337             |
| Aortic aneurysm             | Female | 15-19 years | 95+ years | Global     | -1        | 3     | LDI (1\$ per capita)                     | --              |
| Aortic aneurysm             | Female | 15-19 years | 95+ years | Global     | -1        | 3     | fruits adjusted(g)                       | --              |
| Aortic aneurysm             | Female | 15-19 years | 95+ years | Global     | -1        | 3     | omega 3 adjusted(g)                      | --              |
| Aortic aneurysm             | Female | 15-19 years | 95+ years | Global     | -1        | 3     | pufa adjusted(percent)                   | --              |
| Aortic aneurysm             | Female | 15-19 years | 95+ years | Global     | 0         | 3     | Socio-demographic Index                  | 558             |
| Aortic aneurysm             | Female | 15-19 years | 95+ years | Global     | 0         | 3     | Alcohol (liters per capita)              | 795             |
| Aortic aneurysm             | Male   | 15-19 years | 95+ years | Data Rich  | 1         | 1     | Systolic Blood Pressure (mmHg)           | 112             |
| Aortic aneurysm             | Male   | 15-19 years | 95+ years | Data Rich  | 1         | 1     | Cumulative Cigarettes (10 Years)         | 121             |
| Aortic aneurysm             | Male   | 15-19 years | 95+ years | Data Rich  | 1         | 1     | Log-transformed SEV scalar: Aort An      | 155             |
| Aortic aneurysm             | Male   | 15-19 years | 95+ years | Data Rich  | 1         | 1     | Cholesterol (total, mean per capita)     | 1000            |
| Aortic aneurysm             | Male   | 15-19 years | 95+ years | Data Rich  | -1        | 2     | Healthcare access and quality index      | 122             |
| Aortic aneurysm             | Male   | 15-19 years | 95+ years | Data Rich  | 1         | 2     | Mean BMI                                 | 253             |
| Aortic aneurysm             | Male   | 15-19 years | 95+ years | Data Rich  | -1        | 3     | nuts seeds adjusted(g)                   | 76              |
| Aortic aneurysm             | Male   | 15-19 years | 95+ years | Data Rich  | -1        | 3     | vegetables adjusted(g)                   | 89              |
| Aortic aneurysm             | Male   | 15-19 years | 95+ years | Data Rich  | -1        | 3     | LDI (1\$ per capita)                     | --              |
| Aortic aneurysm             | Male   | 15-19 years | 95+ years | Data Rich  | -1        | 3     | fruits adjusted(g)                       | --              |
| Aortic aneurysm             | Male   | 15-19 years | 95+ years | Data Rich  | -1        | 3     | omega 3 adjusted(g)                      | --              |
| Aortic aneurysm             | Male   | 15-19 years | 95+ years | Data Rich  | -1        | 3     | pufa adjusted(percent)                   | --              |
| Aortic aneurysm             | Male   | 15-19 years | 95+ years | Data Rich  | -1        | 3     | pulses legumes adjusted(g)               | --              |
| Aortic aneurysm             | Male   | 15-19 years | 95+ years | Data Rich  | 0         | 3     | Socio-demographic Index                  | 504             |
| Aortic aneurysm             | Male   | 15-19 years | 95+ years | Data Rich  | 0         | 3     | Alcohol (liters per capita)              | 586             |
| Aortic aneurysm             | Male   | 15-19 years | 95+ years | Global     | 1         | 1     | Cumulative Cigarettes (10 Years)         | 8               |
| Aortic aneurysm             | Male   | 15-19 years | 95+ years | Global     | 1         | 1     | Systolic Blood Pressure (mmHg)           | 158             |
| Aortic aneurysm             | Male   | 15-19 years | 95+ years | Global     | 1         | 1     | Log-transformed SEV scalar: Aort An      | 197             |
| Aortic aneurysm             | Male   | 15-19 years | 95+ years | Global     | 1         | 1     | Cholesterol (total, mean per capita)     | 978             |
| Aortic aneurysm             | Male   | 15-19 years | 95+ years | Global     | -1        | 2     | Healthcare access and quality index      | 99              |
| Aortic aneurysm             | Male   | 15-19 years | 95+ years | Global     | 1         | 2     | Mean BMI                                 | 374             |
| Aortic aneurysm             | Male   | 15-19 years | 95+ years | Global     | -1        | 3     | nuts seeds adjusted(g)                   | 127             |
| Aortic aneurysm             | Male   | 15-19 years | 95+ years | Global     | -1        | 3     | vegetables adjusted(g)                   | 248             |
| Aortic aneurysm             | Male   | 15-19 years | 95+ years | Global     | -1        | 3     | LDI (1\$ per capita)                     | --              |
| Aortic aneurysm             | Male   | 15-19 years | 95+ years | Global     | -1        | 3     | fruits adjusted(g)                       | --              |
| Aortic aneurysm             | Male   | 15-19 years | 95+ years | Global     | -1        | 3     | omega 3 adjusted(g)                      | --              |
| Aortic aneurysm             | Male   | 15-19 years | 95+ years | Global     | -1        | 3     | pufa adjusted(percent)                   | --              |
| Aortic aneurysm             | Male   | 15-19 years | 95+ years | Global     | -1        | 3     | pulses legumes adjusted(g)               | --              |
| Aortic aneurysm             | Male   | 15-19 years | 95+ years | Global     | 0         | 3     | Socio-demographic Index                  | 517             |
| Aortic aneurysm             | Male   | 15-19 years | 95+ years | Global     | 0         | 3     | Alcohol (liters per capita)              | 718             |
| Peripheral vascular disease | Female | 40-44 years | 95+ years | Data Rich  | 1         | 1     | Cholesterol (total, mean per capita)     | --              |
| Peripheral vascular disease | Female | 40-44 years | 95+ years | Data Rich  | 1         | 1     | Log-transformed SEV scalar: PVD          | --              |
| Peripheral vascular disease | Female | 40-44 years | 95+ years | Data Rich  | 1         | 1     | Smoking Prevalence                       | --              |
| Peripheral vascular disease | Female | 40-44 years | 95+ years | Data Rich  | 1         | 1     | Systolic Blood Pressure (mmHg)           | --              |
| Peripheral vascular disease | Female | 40-44 years | 95+ years | Data Rich  | -1        | 2     | Healthcare access and quality index      | --              |
| Peripheral vascular disease | Female | 40-44 years | 95+ years | Data Rich  | 1         | 2     | Diabetes Fasting Plasma Glucose (mmol/L) | 149             |
| Peripheral vascular disease | Female | 40-44 years | 95+ years | Data Rich  | 1         | 2     | Mean BMI                                 | 578             |
| Peripheral vascular disease | Female | 40-44 years | 95+ years | Data Rich  | -1        | 3     | pulses legumes adjusted(g)               | 16              |
| Peripheral vascular disease | Female | 40-44 years | 95+ years | Data Rich  | -1        | 3     | LDI (1\$ per capita)                     | --              |
| Peripheral vascular disease | Female | 40-44 years | 95+ years | Data Rich  | -1        | 3     | fruits adjusted(g)                       | --              |
| Peripheral vascular disease | Female | 40-44 years | 95+ years | Data Rich  | -1        | 3     | nuts seeds adjusted(g)                   | --              |
| Peripheral vascular disease | Female | 40-44 years | 95+ years | Data Rich  | -1        | 3     | omega 3 adjusted(g)                      | --              |
| Peripheral vascular disease | Female | 40-44 years | 95+ years | Data Rich  | -1        | 3     | pufa adjusted(percent)                   | --              |
| Peripheral vascular disease | Female | 40-44 years | 95+ years | Data Rich  | -1        | 3     | vegetables adjusted(g)                   | --              |
| Peripheral vascular disease | Female | 40-44 years | 95+ years | Data Rich  | 0         | 3     | Alcohol (liters per capita)              | 527             |
| Peripheral vascular disease | Female | 40-44 years | 95+ years | Data Rich  | 0         | 3     | Socio-demographic Index                  | 666             |
| Peripheral vascular disease | Female | 40-44 years | 95+ years | Global     | 1         | 1     | Cholesterol (total, mean per capita)     | --              |
| Peripheral vascular disease | Female | 40-44 years | 95+ years | Global     | 1         | 1     | Log-transformed SEV scalar: PVD          | --              |
| Peripheral vascular disease | Female | 40-44 years | 95+ years | Global     | 1         | 1     | Smoking Prevalence                       | --              |
| Peripheral vascular disease | Female | 40-44 years | 95+ years | Global     | 1         | 1     | Systolic Blood Pressure (mmHg)           | --              |
| Peripheral vascular disease | Female | 40-44 years | 95+ years | Global     | -1        | 2     | Healthcare access and quality index      | --              |
| Peripheral vascular disease | Female | 40-44 years | 95+ years | Global     | 1         | 2     | Diabetes Fasting Plasma Glucose (mmol/L) | 142             |
| Peripheral vascular disease | Female | 40-44 years | 95+ years | Global     | 1         | 2     | Mean BMI                                 | 591             |
| Peripheral vascular disease | Female | 40-44 years | 95+ years | Global     | -1        | 3     | pulses legumes adjusted(g)               | 12              |
| Peripheral vascular disease | Female | 40-44 years | 95+ years | Global     | -1        | 3     | LDI (1\$ per capita)                     | --              |

**Appendix Table 9: CODEm covariates used, level of covariate, and expected direction of covariate by cause, sex, and age**

*Covariates that CODEm did not select during the covariate selection process have no draw counts listed.*

| Cause                                         | Sex    | Age Start   | Age End   | Model Type | Direction | Level | Covariate Name                                 | Number of Draws |
|-----------------------------------------------|--------|-------------|-----------|------------|-----------|-------|------------------------------------------------|-----------------|
| Peripheral vascular disease                   | Female | 40-44 years | 95+ years | Global     | -1        | 3     | fruits adjusted(g)                             | --              |
| Peripheral vascular disease                   | Female | 40-44 years | 95+ years | Global     | -1        | 3     | nuts seeds adjusted(g)                         | --              |
| Peripheral vascular disease                   | Female | 40-44 years | 95+ years | Global     | -1        | 3     | omega 3 adjusted(g)                            | --              |
| Peripheral vascular disease                   | Female | 40-44 years | 95+ years | Global     | -1        | 3     | pufa adjusted(percent)                         | --              |
| Peripheral vascular disease                   | Female | 40-44 years | 95+ years | Global     | -1        | 3     | vegetables adjusted(g)                         | --              |
| Peripheral vascular disease                   | Female | 40-44 years | 95+ years | Global     | 0         | 3     | Socio-demographic Index                        | 664             |
| Peripheral vascular disease                   | Female | 40-44 years | 95+ years | Global     | 0         | 3     | Alcohol (liters per capita)                    | 754             |
| Peripheral vascular disease                   | Male   | 40-44 years | 95+ years | Data Rich  | 1         | 1     | Cholesterol (total, mean per capita)           | --              |
| Peripheral vascular disease                   | Male   | 40-44 years | 95+ years | Data Rich  | 1         | 1     | Log-transformed SEV scalar: PVD                | --              |
| Peripheral vascular disease                   | Male   | 40-44 years | 95+ years | Data Rich  | 1         | 1     | Smoking Prevalence                             | --              |
| Peripheral vascular disease                   | Male   | 40-44 years | 95+ years | Data Rich  | 1         | 1     | Systolic Blood Pressure (mmHg)                 | --              |
| Peripheral vascular disease                   | Male   | 40-44 years | 95+ years | Data Rich  | -1        | 2     | Healthcare access and quality index            | --              |
| Peripheral vascular disease                   | Male   | 40-44 years | 95+ years | Data Rich  | 1         | 2     | Mean BMI                                       | 738             |
| Peripheral vascular disease                   | Male   | 40-44 years | 95+ years | Data Rich  | 1         | 2     | Diabetes Fasting Plasma Glucose (mmol/L)       | --              |
| Peripheral vascular disease                   | Male   | 40-44 years | 95+ years | Data Rich  | -1        | 3     | pulses legumes adjusted(g)                     | 34              |
| Peripheral vascular disease                   | Male   | 40-44 years | 95+ years | Data Rich  | -1        | 3     | LDI (IS per capita)                            | --              |
| Peripheral vascular disease                   | Male   | 40-44 years | 95+ years | Data Rich  | -1        | 3     | fruits adjusted(g)                             | --              |
| Peripheral vascular disease                   | Male   | 40-44 years | 95+ years | Data Rich  | -1        | 3     | nuts seeds adjusted(g)                         | --              |
| Peripheral vascular disease                   | Male   | 40-44 years | 95+ years | Data Rich  | -1        | 3     | omega 3 adjusted(g)                            | --              |
| Peripheral vascular disease                   | Male   | 40-44 years | 95+ years | Data Rich  | -1        | 3     | pufa adjusted(percent)                         | --              |
| Peripheral vascular disease                   | Male   | 40-44 years | 95+ years | Data Rich  | -1        | 3     | vegetables adjusted(g)                         | --              |
| Peripheral vascular disease                   | Male   | 40-44 years | 95+ years | Data Rich  | 0         | 3     | Alcohol (liters per capita)                    | 610             |
| Peripheral vascular disease                   | Male   | 40-44 years | 95+ years | Data Rich  | 0         | 3     | Socio-demographic Index                        | 648             |
| Peripheral vascular disease                   | Male   | 40-44 years | 95+ years | Global     | 1         | 1     | Cholesterol (total, mean per capita)           | --              |
| Peripheral vascular disease                   | Male   | 40-44 years | 95+ years | Global     | 1         | 1     | Log-transformed SEV scalar: PVD                | --              |
| Peripheral vascular disease                   | Male   | 40-44 years | 95+ years | Global     | 1         | 1     | Smoking Prevalence                             | --              |
| Peripheral vascular disease                   | Male   | 40-44 years | 95+ years | Global     | 1         | 1     | Systolic Blood Pressure (mmHg)                 | --              |
| Peripheral vascular disease                   | Male   | 40-44 years | 95+ years | Global     | -1        | 2     | Healthcare access and quality index            | --              |
| Peripheral vascular disease                   | Male   | 40-44 years | 95+ years | Global     | 1         | 2     | Mean BMI                                       | 511             |
| Peripheral vascular disease                   | Male   | 40-44 years | 95+ years | Global     | 1         | 2     | Diabetes Fasting Plasma Glucose (mmol/L)       | --              |
| Peripheral vascular disease                   | Male   | 40-44 years | 95+ years | Global     | -1        | 3     | LDI (IS per capita)                            | --              |
| Peripheral vascular disease                   | Male   | 40-44 years | 95+ years | Global     | -1        | 3     | fruits adjusted(g)                             | --              |
| Peripheral vascular disease                   | Male   | 40-44 years | 95+ years | Global     | -1        | 3     | nuts seeds adjusted(g)                         | --              |
| Peripheral vascular disease                   | Male   | 40-44 years | 95+ years | Global     | -1        | 3     | omega 3 adjusted(g)                            | --              |
| Peripheral vascular disease                   | Male   | 40-44 years | 95+ years | Global     | -1        | 3     | pufa adjusted(percent)                         | --              |
| Peripheral vascular disease                   | Male   | 40-44 years | 95+ years | Global     | -1        | 3     | pulses legumes adjusted(g)                     | --              |
| Peripheral vascular disease                   | Male   | 40-44 years | 95+ years | Global     | -1        | 3     | vegetables adjusted(g)                         | --              |
| Peripheral vascular disease                   | Male   | 40-44 years | 95+ years | Global     | 0         | 3     | Alcohol (liters per capita)                    | 815             |
| Peripheral vascular disease                   | Male   | 40-44 years | 95+ years | Global     | 0         | 3     | Socio-demographic Index                        | 815             |
| Endocarditis                                  | Female | 0-6 days    | 95+ years | Data Rich  | -1        | 1     | Improved Water Source (proportion with access) | 602             |
| Endocarditis                                  | Female | 0-6 days    | 95+ years | Data Rich  | -1        | 1     | Healthcare access and quality index            | --              |
| Endocarditis                                  | Female | 0-6 days    | 95+ years | Data Rich  | -1        | 1     | Sanitation (proportion with access)            | --              |
| Endocarditis                                  | Female | 0-6 days    | 95+ years | Data Rich  | 1         | 1     | Log-transformed SEV scalar: Endocar            | --              |
| Endocarditis                                  | Female | 0-6 days    | 95+ years | Data Rich  | -1        | 3     | LDI (IS per capita)                            | --              |
| Endocarditis                                  | Female | 0-6 days    | 95+ years | Data Rich  | 0         | 3     | Socio-demographic Index                        | 726             |
| Endocarditis                                  | Female | 0-6 days    | 95+ years | Global     | 0         | 1     | Healthcare access and quality index            | 599             |
| Endocarditis                                  | Female | 0-6 days    | 95+ years | Global     | 0         | 1     | Improved Water Source (proportion with access) | 648             |
| Endocarditis                                  | Female | 0-6 days    | 95+ years | Global     | 0         | 1     | Sanitation (proportion with access)            | 677             |
| Endocarditis                                  | Female | 0-6 days    | 95+ years | Global     | 0         | 1     | Log-transformed SEV scalar: Endocar            | 759             |
| Endocarditis                                  | Female | 0-6 days    | 95+ years | Global     | 0         | 3     | Socio-demographic Index                        | 469             |
| Endocarditis                                  | Female | 0-6 days    | 95+ years | Global     | 0         | 3     | LDI (IS per capita)                            | --              |
| Endocarditis                                  | Male   | 0-6 days    | 95+ years | Data Rich  | -1        | 1     | Healthcare access and quality index            | --              |
| Endocarditis                                  | Male   | 0-6 days    | 95+ years | Data Rich  | 0         | 1     | Sanitation (proportion with access)            | 689             |
| Endocarditis                                  | Male   | 0-6 days    | 95+ years | Data Rich  | 0         | 1     | Improved Water Source (proportion with access) | 763             |
| Endocarditis                                  | Male   | 0-6 days    | 95+ years | Data Rich  | 0         | 1     | Log-transformed SEV scalar: Endocar            | 800             |
| Endocarditis                                  | Male   | 0-6 days    | 95+ years | Data Rich  | -1        | 3     | LDI (IS per capita)                            | --              |
| Endocarditis                                  | Male   | 0-6 days    | 95+ years | Data Rich  | 0         | 3     | Socio-demographic Index                        | 700             |
| Endocarditis                                  | Male   | 0-6 days    | 95+ years | Global     | 0         | 1     | Healthcare access and quality index            | 417             |
| Endocarditis                                  | Male   | 0-6 days    | 95+ years | Global     | 0         | 1     | Improved Water Source (proportion with access) | 545             |
| Endocarditis                                  | Male   | 0-6 days    | 95+ years | Global     | 0         | 1     | Sanitation (proportion with access)            | 639             |
| Endocarditis                                  | Male   | 0-6 days    | 95+ years | Global     | 0         | 1     | Log-transformed SEV scalar: Endocar            | 675             |
| Endocarditis                                  | Male   | 0-6 days    | 95+ years | Global     | 0         | 3     | Socio-demographic Index                        | 659             |
| Endocarditis                                  | Male   | 0-6 days    | 95+ years | Global     | 0         | 3     | LDI (IS per capita)                            | --              |
| Other cardiovascular and circulatory diseases | Female | 0-6 days    | 95+ years | Data Rich  | 1         | 1     | Log-transformed SEV scalar: Oth Cardio         | 177             |
| Other cardiovascular and circulatory diseases | Female | 0-6 days    | 95+ years | Data Rich  | 1         | 1     | Cholesterol (total, mean per capita)           | 177             |
| Other cardiovascular and circulatory diseases | Female | 0-6 days    | 95+ years | Data Rich  | 1         | 1     | Systolic Blood Pressure (mmHg)                 | 337             |
| Other cardiovascular and circulatory diseases | Female | 0-6 days    | 95+ years | Data Rich  | 1         | 1     | Smoking Prevalence                             | 359             |
| Other cardiovascular and circulatory diseases | Female | 0-6 days    | 95+ years | Data Rich  | -1        | 2     | Healthcare access and quality index            | 381             |
| Other cardiovascular and circulatory diseases | Female | 0-6 days    | 95+ years | Data Rich  | -1        | 2     | Elevation Over 1500m (proportion)              | --              |
| Other cardiovascular and circulatory diseases | Female | 0-6 days    | 95+ years | Data Rich  | 1         | 2     | Indoor Air Pollution (All Cooking Fuels)       | 126             |
| Other cardiovascular and circulatory diseases | Female | 0-6 days    | 95+ years | Data Rich  | 1         | 2     | Diabetes Fasting Plasma Glucose (mmol/L)       | 301             |
| Other cardiovascular and circulatory diseases | Female | 0-6 days    | 95+ years | Data Rich  | 1         | 2     | Outdoor Air Pollution (PM2.5)                  | 507             |
| Other cardiovascular and circulatory diseases | Female | 0-6 days    | 95+ years | Data Rich  | 1         | 2     | Mean BMI                                       | --              |
| Other cardiovascular and circulatory diseases | Female | 0-6 days    | 95+ years | Data Rich  | -1        | 3     | nuts seeds adjusted(g)                         | 10              |
| Other cardiovascular and circulatory diseases | Female | 0-6 days    | 95+ years | Data Rich  | -1        | 3     | vegetables adjusted(g)                         | 16              |
| Other cardiovascular and circulatory diseases | Female | 0-6 days    | 95+ years | Data Rich  | -1        | 3     | LDI (IS per capita)                            | --              |
| Other cardiovascular and circulatory diseases | Female | 0-6 days    | 95+ years | Data Rich  | -1        | 3     | fruits adjusted(g)                             | --              |
| Other cardiovascular and circulatory diseases | Female | 0-6 days    | 95+ years | Data Rich  | -1        | 3     | omega 3 adjusted(g)                            | --              |

**Appendix Table 9: CODEm covariates used, level of covariate, and expected direction of covariate by cause, sex, and age**  
*Covariates that CODEm did not select during the covariate selection process have no draw counts listed.*

| Cause                                         | Sex    | Age Start | Age End   | Model Type | Direction | Level | Covariate Name                                      | Number of Draws |
|-----------------------------------------------|--------|-----------|-----------|------------|-----------|-------|-----------------------------------------------------|-----------------|
| Other cardiovascular and circulatory diseases | Female | 0-6 days  | 95+ years | Data Rich  | -1        | 3     | pufa adjusted(percent)                              | --              |
| Other cardiovascular and circulatory diseases | Female | 0-6 days  | 95+ years | Data Rich  | -1        | 3     | pulses legumes adjusted(g)                          | --              |
| Other cardiovascular and circulatory diseases | Female | 0-6 days  | 95+ years | Data Rich  | 0         | 3     | Socio-demographic Index                             | 626             |
| Other cardiovascular and circulatory diseases | Female | 0-6 days  | 95+ years | Data Rich  | 0         | 3     | Alcohol (liters per capita)                         | 739             |
| Other cardiovascular and circulatory diseases | Female | 0-6 days  | 95+ years | Global     | 1         | 1     | Log-transformed SEV scalar: Oth Cardio              | 27              |
| Other cardiovascular and circulatory diseases | Female | 0-6 days  | 95+ years | Global     | 1         | 1     | Smoking Prevalence                                  | 327             |
| Other cardiovascular and circulatory diseases | Female | 0-6 days  | 95+ years | Global     | 1         | 1     | Systolic Blood Pressure (mmHg)                      | 649             |
| Other cardiovascular and circulatory diseases | Female | 0-6 days  | 95+ years | Global     | 1         | 1     | Cholesterol (total, mean per capita)                | --              |
| Other cardiovascular and circulatory diseases | Female | 0-6 days  | 95+ years | Global     | -1        | 2     | Healthcare access and quality index                 | 359             |
| Other cardiovascular and circulatory diseases | Female | 0-6 days  | 95+ years | Global     | -1        | 2     | Elevation Over 1500m (proportion)                   | --              |
| Other cardiovascular and circulatory diseases | Female | 0-6 days  | 95+ years | Global     | 1         | 2     | Indoor Air Pollution (All Cooking Fuels)            | 167             |
| Other cardiovascular and circulatory diseases | Female | 0-6 days  | 95+ years | Global     | 1         | 2     | Diabetes Fasting Plasma Glucose (mmol/L)            | --              |
| Other cardiovascular and circulatory diseases | Female | 0-6 days  | 95+ years | Global     | 1         | 2     | Mean BMI                                            | --              |
| Other cardiovascular and circulatory diseases | Female | 0-6 days  | 95+ years | Global     | 1         | 2     | Outdoor Air Pollution (PM2.5)                       | --              |
| Other cardiovascular and circulatory diseases | Female | 0-6 days  | 95+ years | Global     | -1        | 3     | nuts seeds adjusted(g)                              | 3               |
| Other cardiovascular and circulatory diseases | Female | 0-6 days  | 95+ years | Global     | -1        | 3     | vegetables adjusted(g)                              | 23              |
| Other cardiovascular and circulatory diseases | Female | 0-6 days  | 95+ years | Global     | -1        | 3     | LDI (1\$ per capita)                                | --              |
| Other cardiovascular and circulatory diseases | Female | 0-6 days  | 95+ years | Global     | -1        | 3     | fruits adjusted(g)                                  | --              |
| Other cardiovascular and circulatory diseases | Female | 0-6 days  | 95+ years | Global     | -1        | 3     | omega 3 adjusted(g)                                 | --              |
| Other cardiovascular and circulatory diseases | Female | 0-6 days  | 95+ years | Global     | -1        | 3     | pufa adjusted(percent)                              | --              |
| Other cardiovascular and circulatory diseases | Female | 0-6 days  | 95+ years | Global     | -1        | 3     | pulses legumes adjusted(g)                          | --              |
| Other cardiovascular and circulatory diseases | Female | 0-6 days  | 95+ years | Global     | 0         | 3     | Socio-demographic Index                             | 708             |
| Other cardiovascular and circulatory diseases | Female | 0-6 days  | 95+ years | Global     | 0         | 3     | Alcohol (liters per capita)                         | 719             |
| Other cardiovascular and circulatory diseases | Male   | 0-6 days  | 95+ years | Data Rich  | 1         | 1     | Log-transformed SEV scalar: Oth Cardio              | 28              |
| Other cardiovascular and circulatory diseases | Male   | 0-6 days  | 95+ years | Data Rich  | 1         | 1     | Smoking Prevalence                                  | 245             |
| Other cardiovascular and circulatory diseases | Male   | 0-6 days  | 95+ years | Data Rich  | 1         | 1     | Systolic Blood Pressure (mmHg)                      | 429             |
| Other cardiovascular and circulatory diseases | Male   | 0-6 days  | 95+ years | Data Rich  | 1         | 1     | Cholesterol (total, mean per capita)                | 536             |
| Other cardiovascular and circulatory diseases | Male   | 0-6 days  | 95+ years | Data Rich  | -1        | 2     | Healthcare access and quality index                 | 176             |
| Other cardiovascular and circulatory diseases | Male   | 0-6 days  | 95+ years | Data Rich  | -1        | 2     | Elevation Over 1500m (proportion)                   | --              |
| Other cardiovascular and circulatory diseases | Male   | 0-6 days  | 95+ years | Data Rich  | 1         | 2     | Indoor Air Pollution (All Cooking Fuels)            | 206             |
| Other cardiovascular and circulatory diseases | Male   | 0-6 days  | 95+ years | Data Rich  | 1         | 2     | Diabetes Fasting Plasma Glucose (mmol/L)            | 253             |
| Other cardiovascular and circulatory diseases | Male   | 0-6 days  | 95+ years | Data Rich  | 1         | 2     | Mean BMI                                            | 253             |
| Other cardiovascular and circulatory diseases | Male   | 0-6 days  | 95+ years | Data Rich  | 1         | 2     | Outdoor Air Pollution (PM2.5)                       | 329             |
| Other cardiovascular and circulatory diseases | Male   | 0-6 days  | 95+ years | Data Rich  | -1        | 3     | vegetables adjusted(g)                              | 2               |
| Other cardiovascular and circulatory diseases | Male   | 0-6 days  | 95+ years | Data Rich  | -1        | 3     | nuts seeds adjusted(g)                              | 6               |
| Other cardiovascular and circulatory diseases | Male   | 0-6 days  | 95+ years | Data Rich  | -1        | 3     | LDI (1\$ per capita)                                | --              |
| Other cardiovascular and circulatory diseases | Male   | 0-6 days  | 95+ years | Data Rich  | -1        | 3     | fruits adjusted(g)                                  | --              |
| Other cardiovascular and circulatory diseases | Male   | 0-6 days  | 95+ years | Data Rich  | -1        | 3     | omega 3 adjusted(g)                                 | --              |
| Other cardiovascular and circulatory diseases | Male   | 0-6 days  | 95+ years | Data Rich  | -1        | 3     | pufa adjusted(percent)                              | --              |
| Other cardiovascular and circulatory diseases | Male   | 0-6 days  | 95+ years | Data Rich  | -1        | 3     | pulses legumes adjusted(g)                          | --              |
| Other cardiovascular and circulatory diseases | Male   | 0-6 days  | 95+ years | Data Rich  | 0         | 3     | Socio-demographic Index                             | 301             |
| Other cardiovascular and circulatory diseases | Male   | 0-6 days  | 95+ years | Data Rich  | 0         | 3     | Alcohol (liters per capita)                         | 725             |
| Other cardiovascular and circulatory diseases | Male   | 0-6 days  | 95+ years | Global     | 1         | 1     | Log-transformed SEV scalar: Oth Cardio              | 32              |
| Other cardiovascular and circulatory diseases | Male   | 0-6 days  | 95+ years | Global     | 1         | 1     | Smoking Prevalence                                  | 81              |
| Other cardiovascular and circulatory diseases | Male   | 0-6 days  | 95+ years | Global     | 1         | 1     | Cholesterol (total, mean per capita)                | 122             |
| Other cardiovascular and circulatory diseases | Male   | 0-6 days  | 95+ years | Global     | 1         | 1     | Systolic Blood Pressure (mmHg)                      | 150             |
| Other cardiovascular and circulatory diseases | Male   | 0-6 days  | 95+ years | Global     | -1        | 2     | Healthcare access and quality index                 | 171             |
| Other cardiovascular and circulatory diseases | Male   | 0-6 days  | 95+ years | Global     | -1        | 2     | Elevation Over 1500m (proportion)                   | --              |
| Other cardiovascular and circulatory diseases | Male   | 0-6 days  | 95+ years | Global     | 1         | 2     | Indoor Air Pollution (All Cooking Fuels)            | 121             |
| Other cardiovascular and circulatory diseases | Male   | 0-6 days  | 95+ years | Global     | 1         | 2     | Diabetes Fasting Plasma Glucose (mmol/L)            | 486             |
| Other cardiovascular and circulatory diseases | Male   | 0-6 days  | 95+ years | Global     | 1         | 2     | Mean BMI                                            | 486             |
| Other cardiovascular and circulatory diseases | Male   | 0-6 days  | 95+ years | Global     | 1         | 2     | Outdoor Air Pollution (PM2.5)                       | 671             |
| Other cardiovascular and circulatory diseases | Male   | 0-6 days  | 95+ years | Global     | -1        | 3     | nuts seeds adjusted(g)                              | 0               |
| Other cardiovascular and circulatory diseases | Male   | 0-6 days  | 95+ years | Global     | -1        | 3     | vegetables adjusted(g)                              | 0               |
| Other cardiovascular and circulatory diseases | Male   | 0-6 days  | 95+ years | Global     | -1        | 3     | LDI (1\$ per capita)                                | --              |
| Other cardiovascular and circulatory diseases | Male   | 0-6 days  | 95+ years | Global     | -1        | 3     | fruits adjusted(g)                                  | --              |
| Other cardiovascular and circulatory diseases | Male   | 0-6 days  | 95+ years | Global     | -1        | 3     | omega 3 adjusted(g)                                 | --              |
| Other cardiovascular and circulatory diseases | Male   | 0-6 days  | 95+ years | Global     | -1        | 3     | pufa adjusted(percent)                              | --              |
| Other cardiovascular and circulatory diseases | Male   | 0-6 days  | 95+ years | Global     | -1        | 3     | pulses legumes adjusted(g)                          | --              |
| Other cardiovascular and circulatory diseases | Male   | 0-6 days  | 95+ years | Global     | 0         | 3     | Socio-demographic Index                             | 394             |
| Other cardiovascular and circulatory diseases | Male   | 0-6 days  | 95+ years | Global     | 0         | 3     | Alcohol (liters per capita)                         | 647             |
| Chronic respiratory diseases                  | Female | 1-4 years | 95+ years | Data Rich  | 1         | 1     | Cumulative Cigarettes (10 Years)                    | 26              |
| Chronic respiratory diseases                  | Female | 1-4 years | 95+ years | Data Rich  | 1         | 1     | Cumulative Cigarettes (5 Years)                     | 48              |
| Chronic respiratory diseases                  | Female | 1-4 years | 95+ years | Data Rich  | 1         | 1     | Log-transformed SEV scalar: Chr Resp                | 1000            |
| Chronic respiratory diseases                  | Female | 1-4 years | 95+ years | Data Rich  | 1         | 1     | Healthcare access and quality index                 | --              |
| Chronic respiratory diseases                  | Female | 1-4 years | 95+ years | Data Rich  | 1         | 2     | Smoking Prevalence                                  | 3               |
| Chronic respiratory diseases                  | Female | 1-4 years | 95+ years | Data Rich  | 1         | 2     | Indoor Air Pollution (All Cooking Fuels)            | 120             |
| Chronic respiratory diseases                  | Female | 1-4 years | 95+ years | Data Rich  | 1         | 2     | Outdoor Air Pollution (PM2.5)                       | 242             |
| Chronic respiratory diseases                  | Female | 1-4 years | 95+ years | Data Rich  | 1         | 2     | Elevation Over 1500m (proportion)                   | 365             |
| Chronic respiratory diseases                  | Female | 1-4 years | 95+ years | Data Rich  | -1        | 3     | Education (years per capita)                        | 142             |
| Chronic respiratory diseases                  | Female | 1-4 years | 95+ years | Data Rich  | -1        | 3     | LDI (1\$ per capita)                                | --              |
| Chronic respiratory diseases                  | Female | 1-4 years | 95+ years | Data Rich  | 0         | 3     | Socio-demographic Index                             | 246             |
| Chronic respiratory diseases                  | Female | 1-4 years | 95+ years | Data Rich  | 1         | 3     | Population Density (over 1000 ppl/sqkm, proportion) | 0               |
| Chronic respiratory diseases                  | Female | 1-4 years | 95+ years | Data Rich  | 1         | 3     | Elevation 500 to 1500m (proportion)                 | 434             |
| Chronic respiratory diseases                  | Female | 1-4 years | 95+ years | Global     | 1         | 1     | Cumulative Cigarettes (10 Years)                    | 22              |
| Chronic respiratory diseases                  | Female | 1-4 years | 95+ years | Global     | 1         | 1     | Cumulative Cigarettes (5 Years)                     | 23              |
| Chronic respiratory diseases                  | Female | 1-4 years | 95+ years | Global     | 1         | 1     | Log-transformed SEV scalar: Chr Resp                | 963             |
| Chronic respiratory diseases                  | Female | 1-4 years | 95+ years | Global     | 1         | 1     | Healthcare access and quality index                 | --              |

**Appendix Table 9: CODEm covariates used, level of covariate, and expected direction of covariate by cause, sex, and age**

*Covariates that CODEm did not select during the covariate selection process have no draw counts listed.*

| Cause                                 | Sex    | Age Start | Age End   | Model Type | Direction | Level | Covariate Name                                      | Number of Draws |
|---------------------------------------|--------|-----------|-----------|------------|-----------|-------|-----------------------------------------------------|-----------------|
| Chronic respiratory diseases          | Female | 1-4 years | 95+ years | Global     | 1         | 2     | Smoking Prevalence                                  | 11              |
| Chronic respiratory diseases          | Female | 1-4 years | 95+ years | Global     | 1         | 2     | Elevation Over 1500m (proportion)                   | 622             |
| Chronic respiratory diseases          | Female | 1-4 years | 95+ years | Global     | 1         | 2     | Indoor Air Pollution (All Cooking Fuels)            | 622             |
| Chronic respiratory diseases          | Female | 1-4 years | 95+ years | Global     | 1         | 2     | Outdoor Air Pollution (PM2.5)                       | --              |
| Chronic respiratory diseases          | Female | 1-4 years | 95+ years | Global     | -1        | 3     | Education (years per capita)                        | 400             |
| Chronic respiratory diseases          | Female | 1-4 years | 95+ years | Global     | -1        | 3     | LDI (IS per capita)                                 | --              |
| Chronic respiratory diseases          | Female | 1-4 years | 95+ years | Global     | 0         | 3     | Socio-demographic Index                             | 153             |
| Chronic respiratory diseases          | Female | 1-4 years | 95+ years | Global     | 1         | 3     | Elevation 500 to 1500m (proportion)                 | 684             |
| Chronic respiratory diseases          | Female | 1-4 years | 95+ years | Global     | 1         | 3     | Population Density (over 1000 ppl/sqkm, proportion) | --              |
| Chronic respiratory diseases          | Male   | 1-4 years | 95+ years | Data Rich  | 1         | 1     | Cumulative Cigarettes (10 Years)                    | 337             |
| Chronic respiratory diseases          | Male   | 1-4 years | 95+ years | Data Rich  | 1         | 1     | Cumulative Cigarettes (5 Years)                     | 526             |
| Chronic respiratory diseases          | Male   | 1-4 years | 95+ years | Data Rich  | 1         | 1     | Log-transformed SEV scalar: Chr Resp                | 721             |
| Chronic respiratory diseases          | Male   | 1-4 years | 95+ years | Data Rich  | -1        | 2     | Healthcare access and quality index                 | 2               |
| Chronic respiratory diseases          | Male   | 1-4 years | 95+ years | Data Rich  | 1         | 2     | Indoor Air Pollution (All Cooking Fuels)            | 0               |
| Chronic respiratory diseases          | Male   | 1-4 years | 95+ years | Data Rich  | 1         | 2     | Smoking Prevalence                                  | 775             |
| Chronic respiratory diseases          | Male   | 1-4 years | 95+ years | Data Rich  | 1         | 2     | Elevation Over 1500m (proportion)                   | 777             |
| Chronic respiratory diseases          | Male   | 1-4 years | 95+ years | Data Rich  | 1         | 2     | Outdoor Air Pollution (PM2.5)                       | 777             |
| Chronic respiratory diseases          | Male   | 1-4 years | 95+ years | Data Rich  | -1        | 3     | Education (years per capita)                        | 140             |
| Chronic respiratory diseases          | Male   | 1-4 years | 95+ years | Data Rich  | -1        | 3     | LDI (IS per capita)                                 | --              |
| Chronic respiratory diseases          | Male   | 1-4 years | 95+ years | Data Rich  | 0         | 3     | Socio-demographic Index                             | 116             |
| Chronic respiratory diseases          | Male   | 1-4 years | 95+ years | Data Rich  | 1         | 3     | Population Density (over 1000 ppl/sqkm, proportion) | 158             |
| Chronic respiratory diseases          | Male   | 1-4 years | 95+ years | Data Rich  | 1         | 3     | Elevation 500 to 1500m (proportion)                 | 484             |
| Chronic respiratory diseases          | Male   | 1-4 years | 95+ years | Global     | 1         | 1     | Cumulative Cigarettes (10 Years)                    | 75              |
| Chronic respiratory diseases          | Male   | 1-4 years | 95+ years | Global     | 1         | 1     | Indoor Air Pollution (All Cooking Fuels)            | 165             |
| Chronic respiratory diseases          | Male   | 1-4 years | 95+ years | Global     | 1         | 1     | Cumulative Cigarettes (5 Years)                     | 234             |
| Chronic respiratory diseases          | Male   | 1-4 years | 95+ years | Global     | 1         | 1     | Smoking Prevalence                                  | 296             |
| Chronic respiratory diseases          | Male   | 1-4 years | 95+ years | Global     | 1         | 1     | Log-transformed SEV scalar: Chr Resp                | 858             |
| Chronic respiratory diseases          | Male   | 1-4 years | 95+ years | Global     | -1        | 2     | Healthcare access and quality index                 | 253             |
| Chronic respiratory diseases          | Male   | 1-4 years | 95+ years | Global     | 1         | 2     | Outdoor Air Pollution (PM2.5)                       | 0               |
| Chronic respiratory diseases          | Male   | 1-4 years | 95+ years | Global     | 1         | 2     | Elevation Over 1500m (proportion)                   | 548             |
| Chronic respiratory diseases          | Male   | 1-4 years | 95+ years | Global     | -1        | 3     | Education (years per capita)                        | 467             |
| Chronic respiratory diseases          | Male   | 1-4 years | 95+ years | Global     | -1        | 3     | LDI (IS per capita)                                 | --              |
| Chronic respiratory diseases          | Male   | 1-4 years | 95+ years | Global     | 0         | 3     | Socio-demographic Index                             | 262             |
| Chronic respiratory diseases          | Male   | 1-4 years | 95+ years | Global     | 1         | 3     | Population Density (over 1000 ppl/sqkm, proportion) | 202             |
| Chronic respiratory diseases          | Male   | 1-4 years | 95+ years | Global     | 1         | 3     | Elevation 500 to 1500m (proportion)                 | 846             |
| Chronic obstructive pulmonary disease | Female | 1-4 years | 95+ years | Data Rich  | 1         | 1     | Outdoor Air Pollution (PM2.5)                       | 446             |
| Chronic obstructive pulmonary disease | Female | 1-4 years | 95+ years | Data Rich  | 1         | 1     | Log-transformed SEV scalar: COPD                    | 581             |
| Chronic obstructive pulmonary disease | Female | 1-4 years | 95+ years | Data Rich  | 1         | 1     | Elevation Over 1500m (proportion)                   | 678             |
| Chronic obstructive pulmonary disease | Female | 1-4 years | 95+ years | Data Rich  | 1         | 1     | Healthcare access and quality index                 | 706             |
| Chronic obstructive pulmonary disease | Female | 1-4 years | 95+ years | Data Rich  | 1         | 1     | Cumulative Cigarettes (10 Years)                    | --              |
| Chronic obstructive pulmonary disease | Female | 1-4 years | 95+ years | Data Rich  | 1         | 1     | Cumulative Cigarettes (5 Years)                     | --              |
| Chronic obstructive pulmonary disease | Female | 1-4 years | 95+ years | Data Rich  | 1         | 2     | Indoor Air Pollution (All Cooking Fuels)            | 1               |
| Chronic obstructive pulmonary disease | Female | 1-4 years | 95+ years | Data Rich  | 1         | 2     | Smoking Prevalence                                  | 3               |
| Chronic obstructive pulmonary disease | Female | 1-4 years | 95+ years | Data Rich  | -1        | 3     | Education (years per capita)                        | 2               |
| Chronic obstructive pulmonary disease | Female | 1-4 years | 95+ years | Data Rich  | -1        | 3     | LDI (IS per capita)                                 | --              |
| Chronic obstructive pulmonary disease | Female | 1-4 years | 95+ years | Data Rich  | 0         | 3     | Socio-demographic Index                             | 782             |
| Chronic obstructive pulmonary disease | Female | 1-4 years | 95+ years | Global     | 1         | 1     | Healthcare access and quality index                 | 588             |
| Chronic obstructive pulmonary disease | Female | 1-4 years | 95+ years | Global     | 1         | 1     | Log-transformed SEV scalar: COPD                    | 680             |
| Chronic obstructive pulmonary disease | Female | 1-4 years | 95+ years | Global     | 1         | 1     | Elevation Over 1500m (proportion)                   | 803             |
| Chronic obstructive pulmonary disease | Female | 1-4 years | 95+ years | Global     | 1         | 1     | Cumulative Cigarettes (10 Years)                    | --              |
| Chronic obstructive pulmonary disease | Female | 1-4 years | 95+ years | Global     | 1         | 1     | Cumulative Cigarettes (5 Years)                     | --              |
| Chronic obstructive pulmonary disease | Female | 1-4 years | 95+ years | Global     | 1         | 1     | Outdoor Air Pollution (PM2.5)                       | --              |
| Chronic obstructive pulmonary disease | Female | 1-4 years | 95+ years | Global     | 1         | 2     | Smoking Prevalence                                  | 3               |
| Chronic obstructive pulmonary disease | Female | 1-4 years | 95+ years | Global     | 1         | 2     | Indoor Air Pollution (All Cooking Fuels)            | 206             |
| Chronic obstructive pulmonary disease | Female | 1-4 years | 95+ years | Global     | -1        | 3     | Education (years per capita)                        | 35              |
| Chronic obstructive pulmonary disease | Female | 1-4 years | 95+ years | Global     | -1        | 3     | LDI (IS per capita)                                 | --              |
| Chronic obstructive pulmonary disease | Female | 1-4 years | 95+ years | Global     | 0         | 3     | Socio-demographic Index                             | 140             |
| Chronic obstructive pulmonary disease | Male   | 1-4 years | 95+ years | Data Rich  | 1         | 1     | Cumulative Cigarettes (10 Years)                    | 0               |
| Chronic obstructive pulmonary disease | Male   | 1-4 years | 95+ years | Data Rich  | 1         | 1     | Cumulative Cigarettes (20 Years)                    | 0               |
| Chronic obstructive pulmonary disease | Male   | 1-4 years | 95+ years | Data Rich  | 1         | 1     | Cumulative Cigarettes (5 Years)                     | 0               |
| Chronic obstructive pulmonary disease | Male   | 1-4 years | 95+ years | Data Rich  | 1         | 1     | Elevation Over 1500m (proportion)                   | 485             |
| Chronic obstructive pulmonary disease | Male   | 1-4 years | 95+ years | Data Rich  | 1         | 1     | Outdoor Air Pollution (PM2.5)                       | 551             |
| Chronic obstructive pulmonary disease | Male   | 1-4 years | 95+ years | Data Rich  | 1         | 1     | Log-transformed SEV scalar: COPD                    | 652             |
| Chronic obstructive pulmonary disease | Male   | 1-4 years | 95+ years | Data Rich  | -1        | 2     | Healthcare access and quality index                 | 0               |
| Chronic obstructive pulmonary disease | Male   | 1-4 years | 95+ years | Data Rich  | 1         | 2     | Indoor Air Pollution (All Cooking Fuels)            | 0               |
| Chronic obstructive pulmonary disease | Male   | 1-4 years | 95+ years | Data Rich  | 1         | 2     | Smoking Prevalence                                  | 488             |
| Chronic obstructive pulmonary disease | Male   | 1-4 years | 95+ years | Data Rich  | -1        | 3     | Education (years per capita)                        | 813             |
| Chronic obstructive pulmonary disease | Male   | 1-4 years | 95+ years | Data Rich  | -1        | 3     | LDI (IS per capita)                                 | --              |
| Chronic obstructive pulmonary disease | Male   | 1-4 years | 95+ years | Data Rich  | 0         | 3     | Socio-demographic Index                             | 940             |
| Chronic obstructive pulmonary disease | Male   | 1-4 years | 95+ years | Global     | 1         | 1     | Cumulative Cigarettes (20 Years)                    | 0               |
| Chronic obstructive pulmonary disease | Male   | 1-4 years | 95+ years | Global     | 1         | 1     | Cumulative Cigarettes (10 Years)                    | 4               |
| Chronic obstructive pulmonary disease | Male   | 1-4 years | 95+ years | Global     | 1         | 1     | Cumulative Cigarettes (5 Years)                     | 7               |
| Chronic obstructive pulmonary disease | Male   | 1-4 years | 95+ years | Global     | 1         | 1     | Outdoor Air Pollution (PM2.5)                       | 124             |
| Chronic obstructive pulmonary disease | Male   | 1-4 years | 95+ years | Global     | 1         | 1     | Log-transformed SEV scalar: COPD                    | 626             |
| Chronic obstructive pulmonary disease | Male   | 1-4 years | 95+ years | Global     | 1         | 1     | Elevation Over 1500m (proportion)                   | 939             |
| Chronic obstructive pulmonary disease | Male   | 1-4 years | 95+ years | Global     | -1        | 2     | Healthcare access and quality index                 | 477             |
| Chronic obstructive pulmonary disease | Male   | 1-4 years | 95+ years | Global     | 1         | 2     | Indoor Air Pollution (All Cooking Fuels)            | 71              |
| Chronic obstructive pulmonary disease | Male   | 1-4 years | 95+ years | Global     | 1         | 2     | Smoking Prevalence                                  | 380             |

**Appendix Table 9: CODEm covariates used, level of covariate, and expected direction of covariate by cause, sex, and age**

*Covariates that CODEm did not select during the covariate selection process have no draw counts listed.*

| Cause                                 | Sex    | Age Start   | Age End   | Model Type | Direction | Level | Covariate Name                                         | Number of Draws |
|---------------------------------------|--------|-------------|-----------|------------|-----------|-------|--------------------------------------------------------|-----------------|
| Chronic obstructive pulmonary disease | Male   | 1-4 years   | 95+ years | Global     | -1        | 3     | Education (years per capita)                           | 437             |
| Chronic obstructive pulmonary disease | Male   | 1-4 years   | 95+ years | Global     | -1        | 3     | LDI (IS per capita)                                    | --              |
| Chronic obstructive pulmonary disease | Male   | 1-4 years   | 95+ years | Global     | 0         | 3     | Socio-demographic Index                                | 664             |
| Pneumoconiosis                        | Female | 15-19 years | 95+ years | Data Rich  | 1         | 1     | Asbestos consumption (metric tons per year per capita) | 260             |
| Pneumoconiosis                        | Female | 15-19 years | 95+ years | Data Rich  | 1         | 1     | Coal Production (per capita)                           | --              |
| Pneumoconiosis                        | Female | 15-19 years | 95+ years | Data Rich  | 1         | 1     | Gold production (kg) per capita                        | --              |
| Pneumoconiosis                        | Female | 15-19 years | 95+ years | Data Rich  | -1        | 2     | Healthcare access and quality index                    | 43              |
| Pneumoconiosis                        | Female | 15-19 years | 95+ years | Data Rich  | 1         | 2     | Cumulative Cigarettes (5 Years)                        | 38              |
| Pneumoconiosis                        | Female | 15-19 years | 95+ years | Data Rich  | 1         | 2     | Indoor Air Pollution (All Cooking Fuels)               | 38              |
| Pneumoconiosis                        | Female | 15-19 years | 95+ years | Data Rich  | 1         | 2     | Smoking Prevalence                                     | 404             |
| Pneumoconiosis                        | Female | 15-19 years | 95+ years | Data Rich  | -1        | 3     | Education (years per capita)                           | 106             |
| Pneumoconiosis                        | Female | 15-19 years | 95+ years | Data Rich  | -1        | 3     | Socio-demographic Index                                | 430             |
| Pneumoconiosis                        | Female | 15-19 years | 95+ years | Data Rich  | -1        | 3     | LDI (IS per capita)                                    | --              |
| Pneumoconiosis                        | Female | 15-19 years | 95+ years | Global     | 1         | 1     | Asbestos consumption (metric tons per year per capita) | 1000            |
| Pneumoconiosis                        | Female | 15-19 years | 95+ years | Global     | 1         | 1     | Coal Production (per capita)                           | --              |
| Pneumoconiosis                        | Female | 15-19 years | 95+ years | Global     | 1         | 1     | Gold production (kg) per capita                        | --              |
| Pneumoconiosis                        | Female | 15-19 years | 95+ years | Global     | -1        | 2     | Healthcare access and quality index                    | 190             |
| Pneumoconiosis                        | Female | 15-19 years | 95+ years | Global     | 1         | 2     | Cumulative Cigarettes (5 Years)                        | 24              |
| Pneumoconiosis                        | Female | 15-19 years | 95+ years | Global     | 1         | 2     | Indoor Air Pollution (All Cooking Fuels)               | 24              |
| Pneumoconiosis                        | Female | 15-19 years | 95+ years | Global     | 1         | 2     | Smoking Prevalence                                     | 193             |
| Pneumoconiosis                        | Female | 15-19 years | 95+ years | Global     | -1        | 3     | Socio-demographic Index                                | 144             |
| Pneumoconiosis                        | Female | 15-19 years | 95+ years | Global     | -1        | 3     | Education (years per capita)                           | 266             |
| Pneumoconiosis                        | Female | 15-19 years | 95+ years | Global     | -1        | 3     | LDI (IS per capita)                                    | --              |
| Pneumoconiosis                        | Male   | 15-19 years | 95+ years | Data Rich  | 1         | 1     | Asbestos consumption (metric tons per year per capita) | 365             |
| Pneumoconiosis                        | Male   | 15-19 years | 95+ years | Data Rich  | 1         | 1     | Coal Production (per capita)                           | 805             |
| Pneumoconiosis                        | Male   | 15-19 years | 95+ years | Data Rich  | 1         | 1     | Gold production (kg) per capita                        | --              |
| Pneumoconiosis                        | Male   | 15-19 years | 95+ years | Data Rich  | -1        | 2     | Healthcare access and quality index                    | 34              |
| Pneumoconiosis                        | Male   | 15-19 years | 95+ years | Data Rich  | 1         | 2     | Indoor Air Pollution (All Cooking Fuels)               | 0               |
| Pneumoconiosis                        | Male   | 15-19 years | 95+ years | Data Rich  | 1         | 2     | Smoking Prevalence                                     | 154             |
| Pneumoconiosis                        | Male   | 15-19 years | 95+ years | Data Rich  | 1         | 2     | Cumulative Cigarettes (5 Years)                        | 167             |
| Pneumoconiosis                        | Male   | 15-19 years | 95+ years | Data Rich  | -1        | 3     | Socio-demographic Index                                | 29              |
| Pneumoconiosis                        | Male   | 15-19 years | 95+ years | Data Rich  | -1        | 3     | Education (years per capita)                           | 323             |
| Pneumoconiosis                        | Male   | 15-19 years | 95+ years | Data Rich  | -1        | 3     | LDI (IS per capita)                                    | --              |
| Pneumoconiosis                        | Male   | 15-19 years | 95+ years | Global     | 1         | 1     | Coal Production (per capita)                           | 567             |
| Pneumoconiosis                        | Male   | 15-19 years | 95+ years | Global     | 1         | 1     | Asbestos consumption (metric tons per year per capita) | 750             |
| Pneumoconiosis                        | Male   | 15-19 years | 95+ years | Global     | 1         | 1     | Gold production (kg) per capita                        | --              |
| Pneumoconiosis                        | Male   | 15-19 years | 95+ years | Global     | -1        | 2     | Healthcare access and quality index                    | 160             |
| Pneumoconiosis                        | Male   | 15-19 years | 95+ years | Global     | 1         | 2     | Indoor Air Pollution (All Cooking Fuels)               | 2               |
| Pneumoconiosis                        | Male   | 15-19 years | 95+ years | Global     | 1         | 2     | Smoking Prevalence                                     | 126             |
| Pneumoconiosis                        | Male   | 15-19 years | 95+ years | Global     | 1         | 2     | Cumulative Cigarettes (5 Years)                        | 154             |
| Pneumoconiosis                        | Male   | 15-19 years | 95+ years | Global     | -1        | 3     | Education (years per capita)                           | 299             |
| Pneumoconiosis                        | Male   | 15-19 years | 95+ years | Global     | -1        | 3     | Socio-demographic Index                                | 413             |
| Pneumoconiosis                        | Male   | 15-19 years | 95+ years | Global     | -1        | 3     | LDI (IS per capita)                                    | --              |
| Silicosis                             | Female | 15-19 years | 95+ years | Data Rich  | 1         | 1     | Gold production (kg) per capita                        | --              |
| Silicosis                             | Female | 15-19 years | 95+ years | Data Rich  | -1        | 2     | Healthcare access and quality index                    | 568             |
| Silicosis                             | Female | 15-19 years | 95+ years | Data Rich  | 1         | 2     | Cumulative Cigarettes (5 Years)                        | --              |
| Silicosis                             | Female | 15-19 years | 95+ years | Data Rich  | 1         | 2     | Indoor Air Pollution (All Cooking Fuels)               | --              |
| Silicosis                             | Female | 15-19 years | 95+ years | Data Rich  | 1         | 2     | Smoking Prevalence                                     | --              |
| Silicosis                             | Female | 15-19 years | 95+ years | Data Rich  | -1        | 3     | Socio-demographic Index                                | 568             |
| Silicosis                             | Female | 15-19 years | 95+ years | Data Rich  | -1        | 3     | Education (years per capita)                           | --              |
| Silicosis                             | Female | 15-19 years | 95+ years | Data Rich  | -1        | 3     | LDI (IS per capita)                                    | --              |
| Silicosis                             | Female | 15-19 years | 95+ years | Global     | 1         | 1     | Gold production (kg) per capita                        | --              |
| Silicosis                             | Female | 15-19 years | 95+ years | Global     | -1        | 2     | Healthcare access and quality index                    | 546             |
| Silicosis                             | Female | 15-19 years | 95+ years | Global     | 1         | 2     | Cumulative Cigarettes (5 Years)                        | --              |
| Silicosis                             | Female | 15-19 years | 95+ years | Global     | 1         | 2     | Indoor Air Pollution (All Cooking Fuels)               | --              |
| Silicosis                             | Female | 15-19 years | 95+ years | Global     | 1         | 2     | Smoking Prevalence                                     | --              |
| Silicosis                             | Female | 15-19 years | 95+ years | Global     | -1        | 3     | Socio-demographic Index                                | 546             |
| Silicosis                             | Female | 15-19 years | 95+ years | Global     | -1        | 3     | Education (years per capita)                           | --              |
| Silicosis                             | Female | 15-19 years | 95+ years | Global     | -1        | 3     | LDI (IS per capita)                                    | --              |
| Silicosis                             | Male   | 15-19 years | 95+ years | Data Rich  | 1         | 1     | Gold production (kg) per capita                        | 823             |
| Silicosis                             | Male   | 15-19 years | 95+ years | Data Rich  | -1        | 2     | Healthcare access and quality index                    | 110             |
| Silicosis                             | Male   | 15-19 years | 95+ years | Data Rich  | 1         | 2     | Indoor Air Pollution (All Cooking Fuels)               | 10              |
| Silicosis                             | Male   | 15-19 years | 95+ years | Data Rich  | 1         | 2     | Cumulative Cigarettes (5 Years)                        | 70              |
| Silicosis                             | Male   | 15-19 years | 95+ years | Data Rich  | 1         | 2     | Smoking Prevalence                                     | 504             |
| Silicosis                             | Male   | 15-19 years | 95+ years | Data Rich  | -1        | 3     | Education (years per capita)                           | 277             |
| Silicosis                             | Male   | 15-19 years | 95+ years | Data Rich  | -1        | 3     | Socio-demographic Index                                | 384             |
| Silicosis                             | Male   | 15-19 years | 95+ years | Data Rich  | -1        | 3     | LDI (IS per capita)                                    | --              |
| Silicosis                             | Male   | 15-19 years | 95+ years | Global     | 1         | 1     | Gold production (kg) per capita                        | 1000            |
| Silicosis                             | Male   | 15-19 years | 95+ years | Global     | -1        | 2     | Healthcare access and quality index                    | 321             |
| Silicosis                             | Male   | 15-19 years | 95+ years | Global     | 1         | 2     | Indoor Air Pollution (All Cooking Fuels)               | 121             |
| Silicosis                             | Male   | 15-19 years | 95+ years | Global     | 1         | 2     | Cumulative Cigarettes (5 Years)                        | 215             |
| Silicosis                             | Male   | 15-19 years | 95+ years | Global     | 1         | 2     | Smoking Prevalence                                     | --              |
| Silicosis                             | Male   | 15-19 years | 95+ years | Global     | -1        | 3     | Socio-demographic Index                                | 192             |
| Silicosis                             | Male   | 15-19 years | 95+ years | Global     | -1        | 3     | Education (years per capita)                           | 225             |
| Silicosis                             | Male   | 15-19 years | 95+ years | Global     | -1        | 3     | LDI (IS per capita)                                    | --              |
| Asbestosis                            | Female | 15-19 years | 95+ years | Data Rich  | 1         | 1     | Asbestos consumption (metric tons per year per capita) | --              |
| Asbestosis                            | Female | 15-19 years | 95+ years | Data Rich  | -1        | 2     | Healthcare access and quality index                    | --              |
| Asbestosis                            | Female | 15-19 years | 95+ years | Data Rich  | 1         | 2     | Elevation Over 1500m (proportion)                      | 744             |

**Appendix Table 9: CODEm covariates used, level of covariate, and expected direction of covariate by cause, sex, and age**  
*Covariates that CODEm did not select during the covariate selection process have no draw counts listed.*

| Cause                       | Sex    | Age Start   | Age End   | Model Type | Direction | Level | Covariate Name                                         | Number of Draws |
|-----------------------------|--------|-------------|-----------|------------|-----------|-------|--------------------------------------------------------|-----------------|
| Asbestosis                  | Female | 15-19 years | 95+ years | Data Rich  | 1         | 2     | Cumulative Cigarettes (10 Years)                       | --              |
| Asbestosis                  | Female | 15-19 years | 95+ years | Data Rich  | 1         | 2     | Cumulative Cigarettes (5 Years)                        | --              |
| Asbestosis                  | Female | 15-19 years | 95+ years | Data Rich  | 1         | 2     | Elevation 500 to 1500m (proportion)                    | --              |
| Asbestosis                  | Female | 15-19 years | 95+ years | Data Rich  | 1         | 2     | Indoor Air Pollution (All Cooking Fuels)               | --              |
| Asbestosis                  | Female | 15-19 years | 95+ years | Data Rich  | 1         | 2     | Smoking Prevalence                                     | --              |
| Asbestosis                  | Female | 15-19 years | 95+ years | Data Rich  | -1        | 3     | Education (years per capita)                           | --              |
| Asbestosis                  | Female | 15-19 years | 95+ years | Data Rich  | -1        | 3     | LDI (I\$ per capita)                                   | --              |
| Asbestosis                  | Female | 15-19 years | 95+ years | Data Rich  | -1        | 3     | Socio-demographic Index                                | --              |
| Asbestosis                  | Female | 15-19 years | 95+ years | Global     | 1         | 1     | Asbestos consumption (metric tons per year per capita) | --              |
| Asbestosis                  | Female | 15-19 years | 95+ years | Global     | -1        | 2     | Healthcare access and quality index                    | 546             |
| Asbestosis                  | Female | 15-19 years | 95+ years | Global     | 1         | 2     | Elevation Over 1500m (proportion)                      | 546             |
| Asbestosis                  | Female | 15-19 years | 95+ years | Global     | 1         | 2     | Cumulative Cigarettes (10 Years)                       | --              |
| Asbestosis                  | Female | 15-19 years | 95+ years | Global     | 1         | 2     | Cumulative Cigarettes (5 Years)                        | --              |
| Asbestosis                  | Female | 15-19 years | 95+ years | Global     | 1         | 2     | Elevation 500 to 1500m (proportion)                    | --              |
| Asbestosis                  | Female | 15-19 years | 95+ years | Global     | 1         | 2     | Indoor Air Pollution (All Cooking Fuels)               | --              |
| Asbestosis                  | Female | 15-19 years | 95+ years | Global     | 1         | 2     | Smoking Prevalence                                     | --              |
| Asbestosis                  | Female | 15-19 years | 95+ years | Global     | -1        | 3     | Education (years per capita)                           | --              |
| Asbestosis                  | Female | 15-19 years | 95+ years | Global     | -1        | 3     | LDI (I\$ per capita)                                   | --              |
| Asbestosis                  | Female | 15-19 years | 95+ years | Global     | -1        | 3     | Socio-demographic Index                                | --              |
| Asbestosis                  | Male   | 15-19 years | 95+ years | Data Rich  | 1         | 1     | Asbestos consumption (metric tons per year per capita) | --              |
| Asbestosis                  | Male   | 15-19 years | 95+ years | Data Rich  | 1         | 1     | Smoking Prevalence                                     | --              |
| Asbestosis                  | Male   | 15-19 years | 95+ years | Data Rich  | -1        | 2     | Healthcare access and quality index                    | --              |
| Asbestosis                  | Male   | 15-19 years | 95+ years | Data Rich  | 1         | 2     | Elevation 500 to 1500m (proportion)                    | 516             |
| Asbestosis                  | Male   | 15-19 years | 95+ years | Data Rich  | 1         | 2     | Elevation Over 1500m (proportion)                      | 516             |
| Asbestosis                  | Male   | 15-19 years | 95+ years | Data Rich  | 1         | 2     | Cumulative Cigarettes (5 Years)                        | --              |
| Asbestosis                  | Male   | 15-19 years | 95+ years | Data Rich  | 1         | 2     | Indoor Air Pollution (All Cooking Fuels)               | --              |
| Asbestosis                  | Male   | 15-19 years | 95+ years | Data Rich  | -1        | 3     | Education (years per capita)                           | --              |
| Asbestosis                  | Male   | 15-19 years | 95+ years | Data Rich  | -1        | 3     | LDI (I\$ per capita)                                   | --              |
| Asbestosis                  | Male   | 15-19 years | 95+ years | Data Rich  | 0         | 3     | Socio-demographic Index                                | 742             |
| Asbestosis                  | Male   | 15-19 years | 95+ years | Global     | 1         | 1     | Asbestos consumption (metric tons per year per capita) | --              |
| Asbestosis                  | Male   | 15-19 years | 95+ years | Global     | -1        | 2     | Healthcare access and quality index                    | --              |
| Asbestosis                  | Male   | 15-19 years | 95+ years | Global     | 1         | 2     | Elevation 500 to 1500m (proportion)                    | 1000            |
| Asbestosis                  | Male   | 15-19 years | 95+ years | Global     | 1         | 2     | Elevation Over 1500m (proportion)                      | 1000            |
| Asbestosis                  | Male   | 15-19 years | 95+ years | Global     | 1         | 2     | Cumulative Cigarettes (5 Years)                        | --              |
| Asbestosis                  | Male   | 15-19 years | 95+ years | Global     | 1         | 2     | Indoor Air Pollution (All Cooking Fuels)               | --              |
| Asbestosis                  | Male   | 15-19 years | 95+ years | Global     | 1         | 2     | Smoking Prevalence                                     | --              |
| Asbestosis                  | Male   | 15-19 years | 95+ years | Global     | -1        | 3     | Education (years per capita)                           | --              |
| Asbestosis                  | Male   | 15-19 years | 95+ years | Global     | -1        | 3     | LDI (I\$ per capita)                                   | --              |
| Asbestosis                  | Male   | 15-19 years | 95+ years | Global     | -1        | 3     | Socio-demographic Index                                | --              |
| Coal workers pneumoconiosis | Female | 15-19 years | 95+ years | Data Rich  | 1         | 1     | Coal Production (per capita)                           | --              |
| Coal workers pneumoconiosis | Female | 15-19 years | 95+ years | Data Rich  | -1        | 2     | Healthcare access and quality index                    | 325             |
| Coal workers pneumoconiosis | Female | 15-19 years | 95+ years | Data Rich  | 1         | 2     | Smoking Prevalence                                     | 325             |
| Coal workers pneumoconiosis | Female | 15-19 years | 95+ years | Data Rich  | 1         | 2     | Cumulative Cigarettes (5 Years)                        | --              |
| Coal workers pneumoconiosis | Female | 15-19 years | 95+ years | Data Rich  | 1         | 2     | Indoor Air Pollution (All Cooking Fuels)               | --              |
| Coal workers pneumoconiosis | Female | 15-19 years | 95+ years | Data Rich  | -1        | 3     | Education (years per capita)                           | --              |
| Coal workers pneumoconiosis | Female | 15-19 years | 95+ years | Data Rich  | -1        | 3     | LDI (I\$ per capita)                                   | --              |
| Coal workers pneumoconiosis | Female | 15-19 years | 95+ years | Data Rich  | -1        | 3     | Socio-demographic Index                                | --              |
| Coal workers pneumoconiosis | Female | 15-19 years | 95+ years | Global     | 1         | 1     | Coal Production (per capita)                           | --              |
| Coal workers pneumoconiosis | Female | 15-19 years | 95+ years | Global     | -1        | 2     | Healthcare access and quality index                    | 105             |
| Coal workers pneumoconiosis | Female | 15-19 years | 95+ years | Global     | 1         | 2     | Smoking Prevalence                                     | 354             |
| Coal workers pneumoconiosis | Female | 15-19 years | 95+ years | Global     | 1         | 2     | Cumulative Cigarettes (5 Years)                        | --              |
| Coal workers pneumoconiosis | Female | 15-19 years | 95+ years | Global     | 1         | 2     | Indoor Air Pollution (All Cooking Fuels)               | --              |
| Coal workers pneumoconiosis | Female | 15-19 years | 95+ years | Global     | -1        | 3     | Socio-demographic Index                                | 281             |
| Coal workers pneumoconiosis | Female | 15-19 years | 95+ years | Global     | -1        | 3     | Education (years per capita)                           | --              |
| Coal workers pneumoconiosis | Female | 15-19 years | 95+ years | Global     | -1        | 3     | LDI (I\$ per capita)                                   | --              |
| Coal workers pneumoconiosis | Male   | 15-19 years | 95+ years | Data Rich  | 1         | 1     | Coal Production (per capita)                           | 1000            |
| Coal workers pneumoconiosis | Male   | 15-19 years | 95+ years | Data Rich  | -1        | 2     | Healthcare access and quality index                    | 327             |
| Coal workers pneumoconiosis | Male   | 15-19 years | 95+ years | Data Rich  | 1         | 2     | Indoor Air Pollution (All Cooking Fuels)               | 68              |
| Coal workers pneumoconiosis | Male   | 15-19 years | 95+ years | Data Rich  | 1         | 2     | Cumulative Cigarettes (5 Years)                        | 250             |
| Coal workers pneumoconiosis | Male   | 15-19 years | 95+ years | Data Rich  | 1         | 2     | Smoking Prevalence                                     | 274             |
| Coal workers pneumoconiosis | Male   | 15-19 years | 95+ years | Data Rich  | -1        | 3     | Socio-demographic Index                                | 195             |
| Coal workers pneumoconiosis | Male   | 15-19 years | 95+ years | Data Rich  | -1        | 3     | Education (years per capita)                           | 464             |
| Coal workers pneumoconiosis | Male   | 15-19 years | 95+ years | Data Rich  | -1        | 3     | LDI (I\$ per capita)                                   | --              |
| Coal workers pneumoconiosis | Male   | 15-19 years | 95+ years | Global     | 1         | 1     | Coal Production (per capita)                           | 1000            |
| Coal workers pneumoconiosis | Male   | 15-19 years | 95+ years | Global     | -1        | 2     | Healthcare access and quality index                    | 461             |
| Coal workers pneumoconiosis | Male   | 15-19 years | 95+ years | Global     | 1         | 2     | Indoor Air Pollution (All Cooking Fuels)               | 64              |
| Coal workers pneumoconiosis | Male   | 15-19 years | 95+ years | Global     | 1         | 2     | Cumulative Cigarettes (5 Years)                        | 334             |
| Coal workers pneumoconiosis | Male   | 15-19 years | 95+ years | Global     | 1         | 2     | Smoking Prevalence                                     | 339             |
| Coal workers pneumoconiosis | Male   | 15-19 years | 95+ years | Global     | -1        | 3     | Socio-demographic Index                                | 191             |
| Coal workers pneumoconiosis | Male   | 15-19 years | 95+ years | Global     | -1        | 3     | Education (years per capita)                           | 232             |
| Coal workers pneumoconiosis | Male   | 15-19 years | 95+ years | Global     | -1        | 3     | LDI (I\$ per capita)                                   | --              |
| Other pneumoconiosis        | Female | 15-19 years | 95+ years | Data Rich  | -1        | 2     | Healthcare access and quality index                    | 89              |
| Other pneumoconiosis        | Female | 15-19 years | 95+ years | Data Rich  | 1         | 2     | Indoor Air Pollution (All Cooking Fuels)               | 38              |
| Other pneumoconiosis        | Female | 15-19 years | 95+ years | Data Rich  | 1         | 2     | Smoking Prevalence                                     | 408             |
| Other pneumoconiosis        | Female | 15-19 years | 95+ years | Data Rich  | 1         | 2     | Cumulative Cigarettes (5 Years)                        | 575             |
| Other pneumoconiosis        | Female | 15-19 years | 95+ years | Data Rich  | -1        | 3     | Socio-demographic Index                                | 137             |
| Other pneumoconiosis        | Female | 15-19 years | 95+ years | Data Rich  | -1        | 3     | Education (years per capita)                           | --              |
| Other pneumoconiosis        | Female | 15-19 years | 95+ years | Data Rich  | -1        | 3     | LDI (I\$ per capita)                                   | --              |



**Appendix Table 9: CODEm covariates used, level of covariate, and expected direction of covariate by cause, sex, and age**

*Covariates that CODEm did not select during the covariate selection process have no draw counts listed.*

| Cause                                               | Sex    | Age Start   | Age End   | Model Type | Direction | Level | Covariate Name                           | Number of Draws |
|-----------------------------------------------------|--------|-------------|-----------|------------|-----------|-------|------------------------------------------|-----------------|
| Other pneumoconiosis                                | Female | 15-19 years | 95+ years | Global     | -1        | 2     | Healthcare access and quality index      | 38              |
| Other pneumoconiosis                                | Female | 15-19 years | 95+ years | Global     | 1         | 2     | Indoor Air Pollution (All Cooking Fuels) | 63              |
| Other pneumoconiosis                                | Female | 15-19 years | 95+ years | Global     | 1         | 2     | Cumulative Cigarettes (5 Years)          | 431             |
| Other pneumoconiosis                                | Female | 15-19 years | 95+ years | Global     | 1         | 2     | Smoking Prevalence                       | 625             |
| Other pneumoconiosis                                | Female | 15-19 years | 95+ years | Global     | -1        | 3     | Education (years per capita)             | 22              |
| Other pneumoconiosis                                | Female | 15-19 years | 95+ years | Global     | -1        | 3     | Socio-demographic Index                  | 236             |
| Other pneumoconiosis                                | Female | 15-19 years | 95+ years | Global     | -1        | 3     | LDI (IS per capita)                      | --              |
| Other pneumoconiosis                                | Male   | 15-19 years | 95+ years | Data Rich  | -1        | 2     | Healthcare access and quality index      | 508             |
| Other pneumoconiosis                                | Male   | 15-19 years | 95+ years | Data Rich  | 1         | 2     | Indoor Air Pollution (All Cooking Fuels) | 169             |
| Other pneumoconiosis                                | Male   | 15-19 years | 95+ years | Data Rich  | 1         | 2     | Cumulative Cigarettes (5 Years)          | 323             |
| Other pneumoconiosis                                | Male   | 15-19 years | 95+ years | Data Rich  | 1         | 2     | Smoking Prevalence                       | 323             |
| Other pneumoconiosis                                | Male   | 15-19 years | 95+ years | Data Rich  | -1        | 3     | Education (years per capita)             | 141             |
| Other pneumoconiosis                                | Male   | 15-19 years | 95+ years | Data Rich  | -1        | 3     | LDI (IS per capita)                      | --              |
| Other pneumoconiosis                                | Male   | 15-19 years | 95+ years | Data Rich  | -1        | 3     | Socio-demographic Index                  | --              |
| Other pneumoconiosis                                | Male   | 15-19 years | 95+ years | Global     | -1        | 2     | Healthcare access and quality index      | 265             |
| Other pneumoconiosis                                | Male   | 15-19 years | 95+ years | Global     | 1         | 2     | Indoor Air Pollution (All Cooking Fuels) | 216             |
| Other pneumoconiosis                                | Male   | 15-19 years | 95+ years | Global     | 1         | 2     | Cumulative Cigarettes (5 Years)          | 435             |
| Other pneumoconiosis                                | Male   | 15-19 years | 95+ years | Global     | 1         | 2     | Smoking Prevalence                       | 719             |
| Other pneumoconiosis                                | Male   | 15-19 years | 95+ years | Global     | -1        | 3     | Socio-demographic Index                  | 52              |
| Other pneumoconiosis                                | Male   | 15-19 years | 95+ years | Global     | -1        | 3     | Education (years per capita)             | 201             |
| Other pneumoconiosis                                | Male   | 15-19 years | 95+ years | Global     | -1        | 3     | LDI (IS per capita)                      | --              |
| Asthma                                              | Female | 1-4 years   | 95+ years | Data Rich  | -1        | 1     | Healthcare access and quality index      | 566             |
| Asthma                                              | Female | 1-4 years   | 95+ years | Data Rich  | 1         | 1     | Cumulative Cigarettes (10 Years)         | 108             |
| Asthma                                              | Female | 1-4 years   | 95+ years | Data Rich  | 1         | 1     | Cumulative Cigarettes (5 Years)          | 199             |
| Asthma                                              | Female | 1-4 years   | 95+ years | Data Rich  | 1         | 1     | Log-transformed SEV scalar: Asthma       | 347             |
| Asthma                                              | Female | 1-4 years   | 95+ years | Data Rich  | 1         | 2     | Smoking Prevalence                       | 5               |
| Asthma                                              | Female | 1-4 years   | 95+ years | Data Rich  | 1         | 2     | Indoor Air Pollution (All Cooking Fuels) | 29              |
| Asthma                                              | Female | 1-4 years   | 95+ years | Data Rich  | 1         | 2     | Outdoor Air Pollution (PM2.5)            | 537             |
| Asthma                                              | Female | 1-4 years   | 95+ years | Data Rich  | -1        | 3     | Socio-demographic Index                  | 2               |
| Asthma                                              | Female | 1-4 years   | 95+ years | Data Rich  | -1        | 3     | Education (years per capita)             | 180             |
| Asthma                                              | Female | 1-4 years   | 95+ years | Data Rich  | -1        | 3     | LDI (IS per capita)                      | --              |
| Asthma                                              | Female | 1-4 years   | 95+ years | Global     | -1        | 1     | Healthcare access and quality index      | 593             |
| Asthma                                              | Female | 1-4 years   | 95+ years | Global     | 1         | 1     | Log-transformed SEV scalar: Asthma       | 106             |
| Asthma                                              | Female | 1-4 years   | 95+ years | Global     | 1         | 1     | Cumulative Cigarettes (5 Years)          | 145             |
| Asthma                                              | Female | 1-4 years   | 95+ years | Global     | 1         | 1     | Cumulative Cigarettes (10 Years)         | 160             |
| Asthma                                              | Female | 1-4 years   | 95+ years | Global     | 1         | 2     | Smoking Prevalence                       | 2               |
| Asthma                                              | Female | 1-4 years   | 95+ years | Global     | 1         | 2     | Indoor Air Pollution (All Cooking Fuels) | 91              |
| Asthma                                              | Female | 1-4 years   | 95+ years | Global     | 1         | 2     | Outdoor Air Pollution (PM2.5)            | 300             |
| Asthma                                              | Female | 1-4 years   | 95+ years | Global     | -1        | 3     | Socio-demographic Index                  | 12              |
| Asthma                                              | Female | 1-4 years   | 95+ years | Global     | -1        | 3     | Education (years per capita)             | 273             |
| Asthma                                              | Female | 1-4 years   | 95+ years | Global     | -1        | 3     | LDI (IS per capita)                      | --              |
| Asthma                                              | Male   | 1-4 years   | 95+ years | Data Rich  | -1        | 1     | Healthcare access and quality index      | 159             |
| Asthma                                              | Male   | 1-4 years   | 95+ years | Data Rich  | 1         | 1     | Cumulative Cigarettes (5 Years)          | 143             |
| Asthma                                              | Male   | 1-4 years   | 95+ years | Data Rich  | 1         | 1     | Cumulative Cigarettes (10 Years)         | 283             |
| Asthma                                              | Male   | 1-4 years   | 95+ years | Data Rich  | 1         | 1     | Log-transformed SEV scalar: Asthma       | 905             |
| Asthma                                              | Male   | 1-4 years   | 95+ years | Data Rich  | 1         | 2     | Outdoor Air Pollution (PM2.5)            | 9               |
| Asthma                                              | Male   | 1-4 years   | 95+ years | Data Rich  | 1         | 2     | Smoking Prevalence                       | 27              |
| Asthma                                              | Male   | 1-4 years   | 95+ years | Data Rich  | 1         | 2     | Indoor Air Pollution (All Cooking Fuels) | 110             |
| Asthma                                              | Male   | 1-4 years   | 95+ years | Data Rich  | -1        | 3     | Socio-demographic Index                  | 432             |
| Asthma                                              | Male   | 1-4 years   | 95+ years | Data Rich  | -1        | 3     | Education (years per capita)             | 571             |
| Asthma                                              | Male   | 1-4 years   | 95+ years | Data Rich  | -1        | 3     | LDI (IS per capita)                      | --              |
| Asthma                                              | Male   | 1-4 years   | 95+ years | Global     | -1        | 1     | Healthcare access and quality index      | 788             |
| Asthma                                              | Male   | 1-4 years   | 95+ years | Global     | 1         | 1     | Cumulative Cigarettes (5 Years)          | 268             |
| Asthma                                              | Male   | 1-4 years   | 95+ years | Global     | 1         | 1     | Cumulative Cigarettes (10 Years)         | 427             |
| Asthma                                              | Male   | 1-4 years   | 95+ years | Global     | 1         | 1     | Log-transformed SEV scalar: Asthma       | 457             |
| Asthma                                              | Male   | 1-4 years   | 95+ years | Global     | 1         | 2     | Smoking Prevalence                       | 63              |
| Asthma                                              | Male   | 1-4 years   | 95+ years | Global     | 1         | 2     | Indoor Air Pollution (All Cooking Fuels) | 70              |
| Asthma                                              | Male   | 1-4 years   | 95+ years | Global     | 1         | 2     | Outdoor Air Pollution (PM2.5)            | 198             |
| Asthma                                              | Male   | 1-4 years   | 95+ years | Global     | -1        | 3     | Socio-demographic Index                  | 76              |
| Asthma                                              | Male   | 1-4 years   | 95+ years | Global     | -1        | 3     | Education (years per capita)             | 549             |
| Asthma                                              | Male   | 1-4 years   | 95+ years | Global     | -1        | 3     | LDI (IS per capita)                      | --              |
| Interstitial lung disease and pulmonary sarcoidosis | Female | 1-4 years   | 95+ years | Data Rich  | 1         | 1     | Log-transformed SEV scalar: ILD          | 414             |
| Interstitial lung disease and pulmonary sarcoidosis | Female | 1-4 years   | 95+ years | Data Rich  | 1         | 1     | Cumulative Cigarettes (10 Years)         | --              |
| Interstitial lung disease and pulmonary sarcoidosis | Female | 1-4 years   | 95+ years | Data Rich  | 1         | 1     | Cumulative Cigarettes (5 Years)          | --              |
| Interstitial lung disease and pulmonary sarcoidosis | Female | 1-4 years   | 95+ years | Data Rich  | 1         | 1     | Smoking Prevalence                       | --              |
| Interstitial lung disease and pulmonary sarcoidosis | Female | 1-4 years   | 95+ years | Data Rich  | -1        | 2     | Healthcare access and quality index      | --              |
| Interstitial lung disease and pulmonary sarcoidosis | Female | 1-4 years   | 95+ years | Data Rich  | 1         | 2     | Outdoor Air Pollution (PM2.5)            | 586             |
| Interstitial lung disease and pulmonary sarcoidosis | Female | 1-4 years   | 95+ years | Data Rich  | 1         | 2     | Indoor Air Pollution (All Cooking Fuels) | --              |
| Interstitial lung disease and pulmonary sarcoidosis | Female | 1-4 years   | 95+ years | Data Rich  | -1        | 3     | Education (years per capita)             | --              |
| Interstitial lung disease and pulmonary sarcoidosis | Female | 1-4 years   | 95+ years | Data Rich  | -1        | 3     | LDI (IS per capita)                      | --              |
| Interstitial lung disease and pulmonary sarcoidosis | Female | 1-4 years   | 95+ years | Data Rich  | 0         | 3     | Socio-demographic Index                  | 618             |
| Interstitial lung disease and pulmonary sarcoidosis | Female | 1-4 years   | 95+ years | Global     | 1         | 1     | Outdoor Air Pollution (PM2.5)            | 681             |
| Interstitial lung disease and pulmonary sarcoidosis | Female | 1-4 years   | 95+ years | Global     | 1         | 1     | Log-transformed SEV scalar: ILD          | 739             |
| Interstitial lung disease and pulmonary sarcoidosis | Female | 1-4 years   | 95+ years | Global     | 1         | 1     | Cumulative Cigarettes (10 Years)         | --              |
| Interstitial lung disease and pulmonary sarcoidosis | Female | 1-4 years   | 95+ years | Global     | 1         | 1     | Cumulative Cigarettes (5 Years)          | --              |
| Interstitial lung disease and pulmonary sarcoidosis | Female | 1-4 years   | 95+ years | Global     | 1         | 1     | Indoor Air Pollution (All Cooking Fuels) | --              |
| Interstitial lung disease and pulmonary sarcoidosis | Female | 1-4 years   | 95+ years | Global     | 1         | 1     | Smoking Prevalence                       | --              |
| Interstitial lung disease and pulmonary sarcoidosis | Female | 1-4 years   | 95+ years | Global     | -1        | 2     | Healthcare access and quality index      | --              |

**Appendix Table 9: CODEm covariates used, level of covariate, and expected direction of covariate by cause, sex, and age**

*Covariates that CODEm did not select during the covariate selection process have no draw counts listed.*

| Cause                                               | Sex    | Age Start | Age End   | Model Type | Direction | Level | Covariate Name                                      | Number of Draws |
|-----------------------------------------------------|--------|-----------|-----------|------------|-----------|-------|-----------------------------------------------------|-----------------|
| Interstitial lung disease and pulmonary sarcoidosis | Female | 1-4 years | 95+ years | Global     | -1        | 3     | Education (years per capita)                        | --              |
| Interstitial lung disease and pulmonary sarcoidosis | Female | 1-4 years | 95+ years | Global     | -1        | 3     | LDI (IS per capita)                                 | --              |
| Interstitial lung disease and pulmonary sarcoidosis | Female | 1-4 years | 95+ years | Global     | 0         | 3     | Socio-demographic Index                             | 693             |
| Interstitial lung disease and pulmonary sarcoidosis | Male   | 1-4 years | 95+ years | Data Rich  | 1         | 1     | Cumulative Cigarettes (10 Years)                    | --              |
| Interstitial lung disease and pulmonary sarcoidosis | Male   | 1-4 years | 95+ years | Data Rich  | 1         | 1     | Cumulative Cigarettes (5 Years)                     | --              |
| Interstitial lung disease and pulmonary sarcoidosis | Male   | 1-4 years | 95+ years | Data Rich  | 1         | 1     | Log-transformed SEV scalar: ILD                     | --              |
| Interstitial lung disease and pulmonary sarcoidosis | Male   | 1-4 years | 95+ years | Data Rich  | 1         | 1     | Smoking Prevalence                                  | --              |
| Interstitial lung disease and pulmonary sarcoidosis | Male   | 1-4 years | 95+ years | Data Rich  | -1        | 2     | Healthcare access and quality index                 | --              |
| Interstitial lung disease and pulmonary sarcoidosis | Male   | 1-4 years | 95+ years | Data Rich  | 1         | 2     | Outdoor Air Pollution (PM2.5)                       | 1000            |
| Interstitial lung disease and pulmonary sarcoidosis | Male   | 1-4 years | 95+ years | Data Rich  | 1         | 2     | Indoor Air Pollution (All Cooking Fuels)            | --              |
| Interstitial lung disease and pulmonary sarcoidosis | Male   | 1-4 years | 95+ years | Data Rich  | -1        | 3     | Education (years per capita)                        | --              |
| Interstitial lung disease and pulmonary sarcoidosis | Male   | 1-4 years | 95+ years | Data Rich  | -1        | 3     | LDI (IS per capita)                                 | --              |
| Interstitial lung disease and pulmonary sarcoidosis | Male   | 1-4 years | 95+ years | Data Rich  | 0         | 3     | Socio-demographic Index                             | 1000            |
| Interstitial lung disease and pulmonary sarcoidosis | Male   | 1-4 years | 95+ years | Global     | 1         | 1     | Cumulative Cigarettes (10 Years)                    | --              |
| Interstitial lung disease and pulmonary sarcoidosis | Male   | 1-4 years | 95+ years | Global     | 1         | 1     | Cumulative Cigarettes (5 Years)                     | --              |
| Interstitial lung disease and pulmonary sarcoidosis | Male   | 1-4 years | 95+ years | Global     | 1         | 1     | Log-transformed SEV scalar: ILD                     | --              |
| Interstitial lung disease and pulmonary sarcoidosis | Male   | 1-4 years | 95+ years | Global     | 1         | 1     | Smoking Prevalence                                  | --              |
| Interstitial lung disease and pulmonary sarcoidosis | Male   | 1-4 years | 95+ years | Global     | -1        | 2     | Healthcare access and quality index                 | --              |
| Interstitial lung disease and pulmonary sarcoidosis | Male   | 1-4 years | 95+ years | Global     | 1         | 2     | Outdoor Air Pollution (PM2.5)                       | 422             |
| Interstitial lung disease and pulmonary sarcoidosis | Male   | 1-4 years | 95+ years | Global     | 1         | 2     | Indoor Air Pollution (All Cooking Fuels)            | --              |
| Interstitial lung disease and pulmonary sarcoidosis | Male   | 1-4 years | 95+ years | Global     | -1        | 3     | Education (years per capita)                        | --              |
| Interstitial lung disease and pulmonary sarcoidosis | Male   | 1-4 years | 95+ years | Global     | -1        | 3     | LDI (IS per capita)                                 | --              |
| Interstitial lung disease and pulmonary sarcoidosis | Male   | 1-4 years | 95+ years | Global     | 0         | 3     | Socio-demographic Index                             | 815             |
| Other chronic respiratory diseases                  | Female | 1-4 years | 95+ years | Data Rich  | 1         | 1     | Indoor Air Pollution (All Cooking Fuels)            | 242             |
| Other chronic respiratory diseases                  | Female | 1-4 years | 95+ years | Data Rich  | 1         | 1     | Outdoor Air Pollution (PM2.5)                       | 536             |
| Other chronic respiratory diseases                  | Female | 1-4 years | 95+ years | Data Rich  | 1         | 1     | Log-transformed SEV scalar: Oth Resp                | 772             |
| Other chronic respiratory diseases                  | Female | 1-4 years | 95+ years | Data Rich  | 1         | 1     | Cumulative Cigarettes (5 Years)                     | --              |
| Other chronic respiratory diseases                  | Female | 1-4 years | 95+ years | Data Rich  | 1         | 1     | Smoking Prevalence                                  | --              |
| Other chronic respiratory diseases                  | Female | 1-4 years | 95+ years | Data Rich  | -1        | 2     | Healthcare access and quality index                 | 58              |
| Other chronic respiratory diseases                  | Female | 1-4 years | 95+ years | Data Rich  | 1         | 2     | Elevation Over 1500m (proportion)                   | 12              |
| Other chronic respiratory diseases                  | Female | 1-4 years | 95+ years | Data Rich  | 1         | 2     | Elevation 500 to 1500m (proportion)                 | 306             |
| Other chronic respiratory diseases                  | Female | 1-4 years | 95+ years | Data Rich  | 1         | 2     | Population Density (over 1000 ppl/sqkm, proportion) | --              |
| Other chronic respiratory diseases                  | Female | 1-4 years | 95+ years | Data Rich  | -1        | 3     | Education (years per capita)                        | 17              |
| Other chronic respiratory diseases                  | Female | 1-4 years | 95+ years | Data Rich  | -1        | 3     | Socio-demographic Index                             | 44              |
| Other chronic respiratory diseases                  | Female | 1-4 years | 95+ years | Data Rich  | -1        | 3     | LDI (IS per capita)                                 | --              |
| Other chronic respiratory diseases                  | Female | 1-4 years | 95+ years | Global     | 1         | 1     | Indoor Air Pollution (All Cooking Fuels)            | 134             |
| Other chronic respiratory diseases                  | Female | 1-4 years | 95+ years | Global     | 1         | 1     | Log-transformed SEV scalar: Oth Resp                | 939             |
| Other chronic respiratory diseases                  | Female | 1-4 years | 95+ years | Global     | 1         | 1     | Cumulative Cigarettes (5 Years)                     | --              |
| Other chronic respiratory diseases                  | Female | 1-4 years | 95+ years | Global     | 1         | 1     | Outdoor Air Pollution (PM2.5)                       | --              |
| Other chronic respiratory diseases                  | Female | 1-4 years | 95+ years | Global     | 1         | 1     | Smoking Prevalence                                  | --              |
| Other chronic respiratory diseases                  | Female | 1-4 years | 95+ years | Global     | -1        | 2     | Healthcare access and quality index                 | 215             |
| Other chronic respiratory diseases                  | Female | 1-4 years | 95+ years | Global     | 1         | 2     | Elevation 500 to 1500m (proportion)                 | 337             |
| Other chronic respiratory diseases                  | Female | 1-4 years | 95+ years | Global     | 1         | 2     | Elevation Over 1500m (proportion)                   | 405             |
| Other chronic respiratory diseases                  | Female | 1-4 years | 95+ years | Global     | 1         | 2     | Population Density (over 1000 ppl/sqkm, proportion) | --              |
| Other chronic respiratory diseases                  | Female | 1-4 years | 95+ years | Global     | -1        | 3     | Socio-demographic Index                             | 70              |
| Other chronic respiratory diseases                  | Female | 1-4 years | 95+ years | Global     | -1        | 3     | Education (years per capita)                        | 300             |
| Other chronic respiratory diseases                  | Female | 1-4 years | 95+ years | Global     | -1        | 3     | LDI (IS per capita)                                 | --              |
| Other chronic respiratory diseases                  | Male   | 1-4 years | 95+ years | Data Rich  | 1         | 1     | Smoking Prevalence                                  | 19              |
| Other chronic respiratory diseases                  | Male   | 1-4 years | 95+ years | Data Rich  | 1         | 1     | Indoor Air Pollution (All Cooking Fuels)            | 230             |
| Other chronic respiratory diseases                  | Male   | 1-4 years | 95+ years | Data Rich  | 1         | 1     | Outdoor Air Pollution (PM2.5)                       | 253             |
| Other chronic respiratory diseases                  | Male   | 1-4 years | 95+ years | Data Rich  | 1         | 1     | Cumulative Cigarettes (5 Years)                     | 401             |
| Other chronic respiratory diseases                  | Male   | 1-4 years | 95+ years | Data Rich  | 1         | 1     | Log-transformed SEV scalar: Oth Resp                | 997             |
| Other chronic respiratory diseases                  | Male   | 1-4 years | 95+ years | Data Rich  | -1        | 2     | Healthcare access and quality index                 | 0               |
| Other chronic respiratory diseases                  | Male   | 1-4 years | 95+ years | Data Rich  | 1         | 2     | Elevation Over 1500m (proportion)                   | 60              |
| Other chronic respiratory diseases                  | Male   | 1-4 years | 95+ years | Data Rich  | 1         | 2     | Elevation 500 to 1500m (proportion)                 | --              |
| Other chronic respiratory diseases                  | Male   | 1-4 years | 95+ years | Data Rich  | 1         | 2     | Population Density (over 1000 ppl/sqkm, proportion) | --              |
| Other chronic respiratory diseases                  | Male   | 1-4 years | 95+ years | Data Rich  | -1        | 3     | Education (years per capita)                        | 0               |
| Other chronic respiratory diseases                  | Male   | 1-4 years | 95+ years | Data Rich  | -1        | 3     | Socio-demographic Index                             | 0               |
| Other chronic respiratory diseases                  | Male   | 1-4 years | 95+ years | Data Rich  | -1        | 3     | LDI (IS per capita)                                 | --              |
| Other chronic respiratory diseases                  | Male   | 1-4 years | 95+ years | Global     | 1         | 1     | Cumulative Cigarettes (5 Years)                     | 132             |
| Other chronic respiratory diseases                  | Male   | 1-4 years | 95+ years | Global     | 1         | 1     | Smoking Prevalence                                  | 139             |
| Other chronic respiratory diseases                  | Male   | 1-4 years | 95+ years | Global     | 1         | 1     | Indoor Air Pollution (All Cooking Fuels)            | 256             |
| Other chronic respiratory diseases                  | Male   | 1-4 years | 95+ years | Global     | 1         | 1     | Log-transformed SEV scalar: Oth Resp                | 932             |
| Other chronic respiratory diseases                  | Male   | 1-4 years | 95+ years | Global     | 1         | 1     | Outdoor Air Pollution (PM2.5)                       | --              |
| Other chronic respiratory diseases                  | Male   | 1-4 years | 95+ years | Global     | -1        | 2     | Healthcare access and quality index                 | 182             |
| Other chronic respiratory diseases                  | Male   | 1-4 years | 95+ years | Global     | 1         | 2     | Elevation Over 1500m (proportion)                   | 390             |
| Other chronic respiratory diseases                  | Male   | 1-4 years | 95+ years | Global     | 1         | 2     | Elevation 500 to 1500m (proportion)                 | 410             |
| Other chronic respiratory diseases                  | Male   | 1-4 years | 95+ years | Global     | 1         | 2     | Population Density (over 1000 ppl/sqkm, proportion) | --              |
| Other chronic respiratory diseases                  | Male   | 1-4 years | 95+ years | Global     | -1        | 3     | Socio-demographic Index                             | 69              |
| Other chronic respiratory diseases                  | Male   | 1-4 years | 95+ years | Global     | -1        | 3     | Education (years per capita)                        | 168             |
| Other chronic respiratory diseases                  | Male   | 1-4 years | 95+ years | Global     | -1        | 3     | LDI (IS per capita)                                 | --              |
| Digestive diseases                                  | Female | 0-6 days  | 95+ years | Data Rich  | -1        | 1     | Sanitation (proportion with access)                 | 417             |
| Digestive diseases                                  | Female | 0-6 days  | 95+ years | Data Rich  | 1         | 1     | Cumulative Cigarettes (5 Years)                     | 596             |
| Digestive diseases                                  | Female | 0-6 days  | 95+ years | Data Rich  | 1         | 1     | Alcohol (liters per capita)                         | 693             |
| Digestive diseases                                  | Female | 0-6 days  | 95+ years | Data Rich  | -1        | 2     | fruits adjusted(g)                                  | 7               |
| Digestive diseases                                  | Female | 0-6 days  | 95+ years | Data Rich  | -1        | 2     | Healthcare access and quality index                 | --              |
| Digestive diseases                                  | Female | 0-6 days  | 95+ years | Data Rich  | 1         | 2     | red meats adjusted(g)                               | --              |
| Digestive diseases                                  | Female | 0-6 days  | 95+ years | Data Rich  | -1        | 3     | LDI (IS per capita)                                 | 156             |



**Appendix Table 9: CODEm covariates used, level of covariate, and expected direction of covariate by cause, sex, and age**

*Covariates that CODEm did not select during the covariate selection process have no draw counts listed.*

| Cause                                      | Sex    | Age Start | Age End   | Model Type | Direction | Level | Covariate Name                                    | Number of Draws |
|--------------------------------------------|--------|-----------|-----------|------------|-----------|-------|---------------------------------------------------|-----------------|
| Digestive diseases                         | Female | 0-6 days  | 95+ years | Data Rich  | -1        | 3     | Socio-demographic Index                           | 317             |
| Digestive diseases                         | Female | 0-6 days  | 95+ years | Data Rich  | -1        | 3     | Education (years per capita)                      | 472             |
| Digestive diseases                         | Female | 0-6 days  | 95+ years | Global     | -1        | 1     | Sanitation (proportion with access)               | 477             |
| Digestive diseases                         | Female | 0-6 days  | 95+ years | Global     | 1         | 1     | Cumulative Cigarettes (5 Years)                   | 150             |
| Digestive diseases                         | Female | 0-6 days  | 95+ years | Global     | 1         | 1     | Alcohol (liters per capita)                       | 814             |
| Digestive diseases                         | Female | 0-6 days  | 95+ years | Global     | -1        | 2     | fruits adjusted(g)                                | 71              |
| Digestive diseases                         | Female | 0-6 days  | 95+ years | Global     | -1        | 2     | Healthcare access and quality index               | 211             |
| Digestive diseases                         | Female | 0-6 days  | 95+ years | Global     | 1         | 2     | red meats adjusted(g)                             | --              |
| Digestive diseases                         | Female | 0-6 days  | 95+ years | Global     | -1        | 3     | LDI (IS per capita)                               | 137             |
| Digestive diseases                         | Female | 0-6 days  | 95+ years | Global     | -1        | 3     | Socio-demographic Index                           | 168             |
| Digestive diseases                         | Female | 0-6 days  | 95+ years | Global     | -1        | 3     | Education (years per capita)                      | 210             |
| Digestive diseases                         | Male   | 0-6 days  | 95+ years | Data Rich  | -1        | 1     | Sanitation (proportion with access)               | 141             |
| Digestive diseases                         | Male   | 0-6 days  | 95+ years | Data Rich  | 1         | 1     | Cumulative Cigarettes (5 Years)                   | 278             |
| Digestive diseases                         | Male   | 0-6 days  | 95+ years | Data Rich  | 1         | 1     | Alcohol (liters per capita)                       | 905             |
| Digestive diseases                         | Male   | 0-6 days  | 95+ years | Data Rich  | -1        | 2     | fruits adjusted(g)                                | 85              |
| Digestive diseases                         | Male   | 0-6 days  | 95+ years | Data Rich  | -1        | 2     | Healthcare access and quality index               | 183             |
| Digestive diseases                         | Male   | 0-6 days  | 95+ years | Data Rich  | 1         | 2     | red meats adjusted(g)                             | --              |
| Digestive diseases                         | Male   | 0-6 days  | 95+ years | Data Rich  | -1        | 3     | LDI (IS per capita)                               | 27              |
| Digestive diseases                         | Male   | 0-6 days  | 95+ years | Data Rich  | -1        | 3     | Education (years per capita)                      | 142             |
| Digestive diseases                         | Male   | 0-6 days  | 95+ years | Data Rich  | -1        | 3     | Socio-demographic Index                           | 186             |
| Digestive diseases                         | Male   | 0-6 days  | 95+ years | Global     | -1        | 1     | Sanitation (proportion with access)               | 414             |
| Digestive diseases                         | Male   | 0-6 days  | 95+ years | Global     | 1         | 1     | Cumulative Cigarettes (5 Years)                   | 111             |
| Digestive diseases                         | Male   | 0-6 days  | 95+ years | Global     | 1         | 1     | Alcohol (liters per capita)                       | 924             |
| Digestive diseases                         | Male   | 0-6 days  | 95+ years | Global     | -1        | 2     | Healthcare access and quality index               | 116             |
| Digestive diseases                         | Male   | 0-6 days  | 95+ years | Global     | -1        | 2     | fruits adjusted(g)                                | 160             |
| Digestive diseases                         | Male   | 0-6 days  | 95+ years | Global     | 1         | 2     | red meats adjusted(g)                             | --              |
| Digestive diseases                         | Male   | 0-6 days  | 95+ years | Global     | -1        | 3     | LDI (IS per capita)                               | 129             |
| Digestive diseases                         | Male   | 0-6 days  | 95+ years | Global     | -1        | 3     | Socio-demographic Index                           | 216             |
| Digestive diseases                         | Male   | 0-6 days  | 95+ years | Global     | -1        | 3     | Education (years per capita)                      | 314             |
| Cirrhosis and other chronic liver diseases | Female | 1-4 years | 95+ years | Data Rich  | -1        | 1     | Hepatitis B 3-dose coverage (proportion)          | --              |
| Cirrhosis and other chronic liver diseases | Female | 1-4 years | 95+ years | Data Rich  | 1         | 1     | Alcohol (liters per capita)                       | 881             |
| Cirrhosis and other chronic liver diseases | Female | 1-4 years | 95+ years | Data Rich  | 1         | 1     | Schistosomiasis Prevalence (proportion)           | 931             |
| Cirrhosis and other chronic liver diseases | Female | 1-4 years | 95+ years | Data Rich  | 1         | 1     | Hepatitis B (HBsAg) Seroprevalence                | --              |
| Cirrhosis and other chronic liver diseases | Female | 1-4 years | 95+ years | Data Rich  | 1         | 1     | Hepatitis C (IgG) Seroprevalence                  | --              |
| Cirrhosis and other chronic liver diseases | Female | 1-4 years | 95+ years | Data Rich  | -1        | 2     | Healthcare access and quality index               | 187             |
| Cirrhosis and other chronic liver diseases | Female | 1-4 years | 95+ years | Data Rich  | 1         | 2     | Diabetes Age-Standardized Prevalence (proportion) | 397             |
| Cirrhosis and other chronic liver diseases | Female | 1-4 years | 95+ years | Data Rich  | 1         | 2     | Mean BMI                                          | --              |
| Cirrhosis and other chronic liver diseases | Female | 1-4 years | 95+ years | Data Rich  | -1        | 3     | Health System Access 2 (unitless)                 | 79              |
| Cirrhosis and other chronic liver diseases | Female | 1-4 years | 95+ years | Data Rich  | -1        | 3     | Education (years per capita)                      | --              |
| Cirrhosis and other chronic liver diseases | Female | 1-4 years | 95+ years | Data Rich  | -1        | 3     | LDI (IS per capita)                               | --              |
| Cirrhosis and other chronic liver diseases | Female | 1-4 years | 95+ years | Data Rich  | 0         | 3     | Socio-demographic Index                           | 363             |
| Cirrhosis and other chronic liver diseases | Female | 1-4 years | 95+ years | Global     | -1        | 1     | Hepatitis B 3-dose coverage (proportion)          | 33              |
| Cirrhosis and other chronic liver diseases | Female | 1-4 years | 95+ years | Global     | 1         | 1     | Hepatitis B (HBsAg) Seroprevalence                | 22              |
| Cirrhosis and other chronic liver diseases | Female | 1-4 years | 95+ years | Global     | 1         | 1     | Schistosomiasis Prevalence (proportion)           | 247             |
| Cirrhosis and other chronic liver diseases | Female | 1-4 years | 95+ years | Global     | 1         | 1     | Alcohol (liters per capita)                       | 937             |
| Cirrhosis and other chronic liver diseases | Female | 1-4 years | 95+ years | Global     | 1         | 1     | Hepatitis C (IgG) Seroprevalence                  | --              |
| Cirrhosis and other chronic liver diseases | Female | 1-4 years | 95+ years | Global     | -1        | 2     | Healthcare access and quality index               | 54              |
| Cirrhosis and other chronic liver diseases | Female | 1-4 years | 95+ years | Global     | 1         | 2     | Mean BMI                                          | 365             |
| Cirrhosis and other chronic liver diseases | Female | 1-4 years | 95+ years | Global     | 1         | 2     | Diabetes Age-Standardized Prevalence (proportion) | --              |
| Cirrhosis and other chronic liver diseases | Female | 1-4 years | 95+ years | Global     | -1        | 3     | Education (years per capita)                      | 36              |
| Cirrhosis and other chronic liver diseases | Female | 1-4 years | 95+ years | Global     | -1        | 3     | Health System Access 2 (unitless)                 | 67              |
| Cirrhosis and other chronic liver diseases | Female | 1-4 years | 95+ years | Global     | -1        | 3     | LDI (IS per capita)                               | --              |
| Cirrhosis and other chronic liver diseases | Female | 1-4 years | 95+ years | Global     | 0         | 3     | Socio-demographic Index                           | 579             |
| Cirrhosis and other chronic liver diseases | Male   | 1-4 years | 95+ years | Data Rich  | -1        | 1     | Hepatitis B 3-dose coverage (proportion)          | 42              |
| Cirrhosis and other chronic liver diseases | Male   | 1-4 years | 95+ years | Data Rich  | 1         | 1     | Alcohol (liters per capita)                       | 640             |
| Cirrhosis and other chronic liver diseases | Male   | 1-4 years | 95+ years | Data Rich  | 1         | 1     | Schistosomiasis Prevalence (proportion)           | 683             |
| Cirrhosis and other chronic liver diseases | Male   | 1-4 years | 95+ years | Data Rich  | 1         | 1     | Hepatitis B (HBsAg) Seroprevalence                | --              |
| Cirrhosis and other chronic liver diseases | Male   | 1-4 years | 95+ years | Data Rich  | 1         | 1     | Hepatitis C (IgG) Seroprevalence                  | --              |
| Cirrhosis and other chronic liver diseases | Male   | 1-4 years | 95+ years | Data Rich  | -1        | 2     | Healthcare access and quality index               | 50              |
| Cirrhosis and other chronic liver diseases | Male   | 1-4 years | 95+ years | Data Rich  | 1         | 2     | Mean BMI                                          | 272             |
| Cirrhosis and other chronic liver diseases | Male   | 1-4 years | 95+ years | Data Rich  | 1         | 2     | Diabetes Age-Standardized Prevalence (proportion) | --              |
| Cirrhosis and other chronic liver diseases | Male   | 1-4 years | 95+ years | Data Rich  | -1        | 3     | Health System Access 2 (unitless)                 | 105             |
| Cirrhosis and other chronic liver diseases | Male   | 1-4 years | 95+ years | Data Rich  | -1        | 3     | Education (years per capita)                      | --              |
| Cirrhosis and other chronic liver diseases | Male   | 1-4 years | 95+ years | Data Rich  | -1        | 3     | LDI (IS per capita)                               | --              |
| Cirrhosis and other chronic liver diseases | Male   | 1-4 years | 95+ years | Data Rich  | 0         | 3     | Socio-demographic Index                           | 739             |
| Cirrhosis and other chronic liver diseases | Male   | 1-4 years | 95+ years | Global     | -1        | 1     | Hepatitis B 3-dose coverage (proportion)          | 65              |
| Cirrhosis and other chronic liver diseases | Male   | 1-4 years | 95+ years | Global     | 1         | 1     | Hepatitis B (HBsAg) Seroprevalence                | 63              |
| Cirrhosis and other chronic liver diseases | Male   | 1-4 years | 95+ years | Global     | 1         | 1     | Schistosomiasis Prevalence (proportion)           | 415             |
| Cirrhosis and other chronic liver diseases | Male   | 1-4 years | 95+ years | Global     | 1         | 1     | Alcohol (liters per capita)                       | 837             |
| Cirrhosis and other chronic liver diseases | Male   | 1-4 years | 95+ years | Global     | 1         | 1     | Hepatitis C (IgG) Seroprevalence                  | --              |
| Cirrhosis and other chronic liver diseases | Male   | 1-4 years | 95+ years | Global     | -1        | 2     | Healthcare access and quality index               | 60              |
| Cirrhosis and other chronic liver diseases | Male   | 1-4 years | 95+ years | Global     | 1         | 2     | Mean BMI                                          | 535             |
| Cirrhosis and other chronic liver diseases | Male   | 1-4 years | 95+ years | Global     | 1         | 2     | Diabetes Age-Standardized Prevalence (proportion) | --              |
| Cirrhosis and other chronic liver diseases | Male   | 1-4 years | 95+ years | Global     | -1        | 3     | Education (years per capita)                      | 14              |
| Cirrhosis and other chronic liver diseases | Male   | 1-4 years | 95+ years | Global     | -1        | 3     | Health System Access 2 (unitless)                 | 148             |
| Cirrhosis and other chronic liver diseases | Male   | 1-4 years | 95+ years | Global     | -1        | 3     | LDI (IS per capita)                               | --              |
| Cirrhosis and other chronic liver diseases | Male   | 1-4 years | 95+ years | Global     | 0         | 3     | Socio-demographic Index                           | 517             |
| Upper digestive system diseases            | Female | 1-4 years | 95+ years | Data Rich  | 1         | 1     | Cumulative Cigarettes (5 Years)                   | 82              |

**Appendix Table 9: CODEm covariates used, level of covariate, and expected direction of covariate by cause, sex, and age**

*Covariates that CODEm did not select during the covariate selection process have no draw counts listed.*

| Cause                           | Sex    | Age Start | Age End   | Model Type | Direction | Level | Covariate Name                        | Number of Draws |
|---------------------------------|--------|-----------|-----------|------------|-----------|-------|---------------------------------------|-----------------|
| Upper digestive system diseases | Female | 1-4 years | 95+ years | Data Rich  | 1         | 1     | Cumulative Cigarettes (10 Years)      | 288             |
| Upper digestive system diseases | Female | 1-4 years | 95+ years | Data Rich  | 1         | 1     | Smoking Prevalence                    | 409             |
| Upper digestive system diseases | Female | 1-4 years | 95+ years | Data Rich  | 1         | 1     | Alcohol (liters per capita)           | 426             |
| Upper digestive system diseases | Female | 1-4 years | 95+ years | Data Rich  | -1        | 2     | Sanitation (proportion with access)   | 18              |
| Upper digestive system diseases | Female | 1-4 years | 95+ years | Data Rich  | -1        | 2     | Healthcare access and quality index   | 981             |
| Upper digestive system diseases | Female | 1-4 years | 95+ years | Data Rich  | 0         | 2     | vegetables adjusted(g)                | 999             |
| Upper digestive system diseases | Female | 1-4 years | 95+ years | Data Rich  | 1         | 2     | SEV unsafe water                      | 807             |
| Upper digestive system diseases | Female | 1-4 years | 95+ years | Data Rich  | -1        | 3     | Maternal Education (years per capita) | 0               |
| Upper digestive system diseases | Female | 1-4 years | 95+ years | Data Rich  | -1        | 3     | Socio-demographic Index               | 528             |
| Upper digestive system diseases | Female | 1-4 years | 95+ years | Data Rich  | -1        | 3     | LDI (I\$ per capita)                  | --              |
| Upper digestive system diseases | Female | 1-4 years | 95+ years | Global     | 1         | 1     | Smoking Prevalence                    | 216             |
| Upper digestive system diseases | Female | 1-4 years | 95+ years | Global     | 1         | 1     | Cumulative Cigarettes (5 Years)       | 299             |
| Upper digestive system diseases | Female | 1-4 years | 95+ years | Global     | 1         | 1     | Cumulative Cigarettes (10 Years)      | 394             |
| Upper digestive system diseases | Female | 1-4 years | 95+ years | Global     | 1         | 1     | Alcohol (liters per capita)           | 640             |
| Upper digestive system diseases | Female | 1-4 years | 95+ years | Global     | -1        | 2     | Sanitation (proportion with access)   | 69              |
| Upper digestive system diseases | Female | 1-4 years | 95+ years | Global     | -1        | 2     | Healthcare access and quality index   | 654             |
| Upper digestive system diseases | Female | 1-4 years | 95+ years | Global     | 0         | 2     | vegetables adjusted(g)                | 699             |
| Upper digestive system diseases | Female | 1-4 years | 95+ years | Global     | 1         | 2     | SEV unsafe water                      | 313             |
| Upper digestive system diseases | Female | 1-4 years | 95+ years | Global     | -1        | 3     | Socio-demographic Index               | 286             |
| Upper digestive system diseases | Female | 1-4 years | 95+ years | Global     | -1        | 3     | Maternal Education (years per capita) | 344             |
| Upper digestive system diseases | Female | 1-4 years | 95+ years | Global     | -1        | 3     | LDI (I\$ per capita)                  | --              |
| Upper digestive system diseases | Male   | 1-4 years | 95+ years | Data Rich  | 1         | 1     | Alcohol (liters per capita)           | 1               |
| Upper digestive system diseases | Male   | 1-4 years | 95+ years | Data Rich  | 1         | 1     | Cumulative Cigarettes (10 Years)      | 362             |
| Upper digestive system diseases | Male   | 1-4 years | 95+ years | Data Rich  | 1         | 1     | Smoking Prevalence                    | 605             |
| Upper digestive system diseases | Male   | 1-4 years | 95+ years | Data Rich  | 1         | 1     | Cumulative Cigarettes (5 Years)       | 637             |
| Upper digestive system diseases | Male   | 1-4 years | 95+ years | Data Rich  | -1        | 2     | Healthcare access and quality index   | 2               |
| Upper digestive system diseases | Male   | 1-4 years | 95+ years | Data Rich  | -1        | 2     | Sanitation (proportion with access)   | 690             |
| Upper digestive system diseases | Male   | 1-4 years | 95+ years | Data Rich  | 0         | 2     | vegetables adjusted(g)                | 591             |
| Upper digestive system diseases | Male   | 1-4 years | 95+ years | Data Rich  | 1         | 2     | SEV unsafe water                      | 448             |
| Upper digestive system diseases | Male   | 1-4 years | 95+ years | Data Rich  | -1        | 3     | Maternal Education (years per capita) | 153             |
| Upper digestive system diseases | Male   | 1-4 years | 95+ years | Data Rich  | -1        | 3     | Socio-demographic Index               | 337             |
| Upper digestive system diseases | Male   | 1-4 years | 95+ years | Data Rich  | -1        | 3     | LDI (I\$ per capita)                  | --              |
| Upper digestive system diseases | Male   | 1-4 years | 95+ years | Global     | 1         | 1     | Cumulative Cigarettes (5 Years)       | 242             |
| Upper digestive system diseases | Male   | 1-4 years | 95+ years | Global     | 1         | 1     | Smoking Prevalence                    | 286             |
| Upper digestive system diseases | Male   | 1-4 years | 95+ years | Global     | 1         | 1     | Cumulative Cigarettes (10 Years)      | 406             |
| Upper digestive system diseases | Male   | 1-4 years | 95+ years | Global     | 1         | 1     | Alcohol (liters per capita)           | 753             |
| Upper digestive system diseases | Male   | 1-4 years | 95+ years | Global     | -1        | 2     | Sanitation (proportion with access)   | 783             |
| Upper digestive system diseases | Male   | 1-4 years | 95+ years | Global     | -1        | 2     | Healthcare access and quality index   | 852             |
| Upper digestive system diseases | Male   | 1-4 years | 95+ years | Global     | 0         | 2     | vegetables adjusted(g)                | 793             |
| Upper digestive system diseases | Male   | 1-4 years | 95+ years | Global     | 1         | 2     | SEV unsafe water                      | 100             |
| Upper digestive system diseases | Male   | 1-4 years | 95+ years | Global     | -1        | 3     | Maternal Education (years per capita) | 85              |
| Upper digestive system diseases | Male   | 1-4 years | 95+ years | Global     | -1        | 3     | Socio-demographic Index               | 124             |
| Upper digestive system diseases | Male   | 1-4 years | 95+ years | Global     | -1        | 3     | LDI (I\$ per capita)                  | --              |
| Peptic ulcer disease            | Female | 1-4 years | 95+ years | Data Rich  | 1         | 1     | Cumulative Cigarettes (10 Years)      | 288             |
| Peptic ulcer disease            | Female | 1-4 years | 95+ years | Data Rich  | 1         | 1     | Cumulative Cigarettes (5 Years)       | 296             |
| Peptic ulcer disease            | Female | 1-4 years | 95+ years | Data Rich  | 1         | 1     | Alcohol (liters per capita)           | 478             |
| Peptic ulcer disease            | Female | 1-4 years | 95+ years | Data Rich  | 1         | 1     | Smoking Prevalence                    | 741             |
| Peptic ulcer disease            | Female | 1-4 years | 95+ years | Data Rich  | -1        | 2     | Sanitation (proportion with access)   | 0               |
| Peptic ulcer disease            | Female | 1-4 years | 95+ years | Data Rich  | -1        | 2     | Healthcare access and quality index   | 961             |
| Peptic ulcer disease            | Female | 1-4 years | 95+ years | Data Rich  | 0         | 2     | vegetables adjusted(g)                | 956             |
| Peptic ulcer disease            | Female | 1-4 years | 95+ years | Data Rich  | 1         | 2     | SEV unsafe water                      | 965             |
| Peptic ulcer disease            | Female | 1-4 years | 95+ years | Data Rich  | -1        | 3     | Maternal Education (years per capita) | 48              |
| Peptic ulcer disease            | Female | 1-4 years | 95+ years | Data Rich  | -1        | 3     | Socio-demographic Index               | 448             |
| Peptic ulcer disease            | Female | 1-4 years | 95+ years | Data Rich  | -1        | 3     | LDI (I\$ per capita)                  | --              |
| Peptic ulcer disease            | Female | 1-4 years | 95+ years | Global     | 1         | 1     | Cumulative Cigarettes (5 Years)       | 244             |
| Peptic ulcer disease            | Female | 1-4 years | 95+ years | Global     | 1         | 1     | Cumulative Cigarettes (10 Years)      | 381             |
| Peptic ulcer disease            | Female | 1-4 years | 95+ years | Global     | 1         | 1     | Smoking Prevalence                    | 684             |
| Peptic ulcer disease            | Female | 1-4 years | 95+ years | Global     | 1         | 1     | Alcohol (liters per capita)           | 966             |
| Peptic ulcer disease            | Female | 1-4 years | 95+ years | Global     | -1        | 2     | Sanitation (proportion with access)   | 15              |
| Peptic ulcer disease            | Female | 1-4 years | 95+ years | Global     | -1        | 2     | Healthcare access and quality index   | 930             |
| Peptic ulcer disease            | Female | 1-4 years | 95+ years | Global     | 0         | 2     | vegetables adjusted(g)                | 933             |
| Peptic ulcer disease            | Female | 1-4 years | 95+ years | Global     | 1         | 2     | SEV unsafe water                      | 930             |
| Peptic ulcer disease            | Female | 1-4 years | 95+ years | Global     | -1        | 3     | Maternal Education (years per capita) | 36              |
| Peptic ulcer disease            | Female | 1-4 years | 95+ years | Global     | -1        | 3     | Socio-demographic Index               | 368             |
| Peptic ulcer disease            | Female | 1-4 years | 95+ years | Global     | -1        | 3     | LDI (I\$ per capita)                  | --              |
| Peptic ulcer disease            | Male   | 1-4 years | 95+ years | Data Rich  | 1         | 1     | Cumulative Cigarettes (10 Years)      | 101             |
| Peptic ulcer disease            | Male   | 1-4 years | 95+ years | Data Rich  | 1         | 1     | Smoking Prevalence                    | 505             |
| Peptic ulcer disease            | Male   | 1-4 years | 95+ years | Data Rich  | 1         | 1     | Cumulative Cigarettes (5 Years)       | 580             |
| Peptic ulcer disease            | Male   | 1-4 years | 95+ years | Data Rich  | 1         | 1     | Alcohol (liters per capita)           | 775             |
| Peptic ulcer disease            | Male   | 1-4 years | 95+ years | Data Rich  | -1        | 2     | Healthcare access and quality index   | 955             |
| Peptic ulcer disease            | Male   | 1-4 years | 95+ years | Data Rich  | -1        | 2     | Sanitation (proportion with access)   | 979             |
| Peptic ulcer disease            | Male   | 1-4 years | 95+ years | Data Rich  | 0         | 2     | vegetables adjusted(g)                | 923             |
| Peptic ulcer disease            | Male   | 1-4 years | 95+ years | Data Rich  | 1         | 2     | SEV unsafe water                      | 944             |
| Peptic ulcer disease            | Male   | 1-4 years | 95+ years | Data Rich  | -1        | 3     | Maternal Education (years per capita) | 75              |
| Peptic ulcer disease            | Male   | 1-4 years | 95+ years | Data Rich  | -1        | 3     | Socio-demographic Index               | 129             |
| Peptic ulcer disease            | Male   | 1-4 years | 95+ years | Data Rich  | -1        | 3     | LDI (I\$ per capita)                  | --              |
| Peptic ulcer disease            | Male   | 1-4 years | 95+ years | Global     | 1         | 1     | Cumulative Cigarettes (5 Years)       | 346             |
| Peptic ulcer disease            | Male   | 1-4 years | 95+ years | Global     | 1         | 1     | Cumulative Cigarettes (10 Years)      | 409             |

**Appendix Table 9: CODEm covariates used, level of covariate, and expected direction of covariate by cause, sex, and age**

*Covariates that CODEm did not select during the covariate selection process have no draw counts listed.*

| Cause                    | Sex    | Age Start | Age End   | Model Type | Direction | Level | Covariate Name                        | Number of Draws |
|--------------------------|--------|-----------|-----------|------------|-----------|-------|---------------------------------------|-----------------|
| Peptic ulcer disease     | Male   | 1-4 years | 95+ years | Global     | 1         | 1     | Smoking Prevalence                    | 465             |
| Peptic ulcer disease     | Male   | 1-4 years | 95+ years | Global     | 1         | 1     | Alcohol (liters per capita)           | 719             |
| Peptic ulcer disease     | Male   | 1-4 years | 95+ years | Global     | -1        | 2     | Sanitation (proportion with access)   | 789             |
| Peptic ulcer disease     | Male   | 1-4 years | 95+ years | Global     | -1        | 2     | Healthcare access and quality index   | 852             |
| Peptic ulcer disease     | Male   | 1-4 years | 95+ years | Global     | 0         | 2     | vegetables adjusted(g)                | 855             |
| Peptic ulcer disease     | Male   | 1-4 years | 95+ years | Global     | 1         | 2     | SEV unsafe water                      | 525             |
| Peptic ulcer disease     | Male   | 1-4 years | 95+ years | Global     | -1        | 3     | Maternal Education (years per capita) | 125             |
| Peptic ulcer disease     | Male   | 1-4 years | 95+ years | Global     | -1        | 3     | Socio-demographic Index               | 135             |
| Peptic ulcer disease     | Male   | 1-4 years | 95+ years | Global     | -1        | 3     | LDI (IS per capita)                   | --              |
| Gastritis and duodenitis | Female | 1-4 years | 95+ years | Data Rich  | 1         | 1     | Cumulative Cigarettes (5 Years)       | 5               |
| Gastritis and duodenitis | Female | 1-4 years | 95+ years | Data Rich  | 1         | 1     | Cumulative Cigarettes (10 Years)      | 161             |
| Gastritis and duodenitis | Female | 1-4 years | 95+ years | Data Rich  | 1         | 1     | Alcohol (liters per capita)           | 907             |
| Gastritis and duodenitis | Female | 1-4 years | 95+ years | Data Rich  | 1         | 1     | Smoking Prevalence                    | --              |
| Gastritis and duodenitis | Female | 1-4 years | 95+ years | Data Rich  | -1        | 2     | Sanitation (proportion with access)   | 142             |
| Gastritis and duodenitis | Female | 1-4 years | 95+ years | Data Rich  | -1        | 2     | Healthcare access and quality index   | 185             |
| Gastritis and duodenitis | Female | 1-4 years | 95+ years | Data Rich  | 0         | 2     | vegetables adjusted(g)                | 81              |
| Gastritis and duodenitis | Female | 1-4 years | 95+ years | Data Rich  | 1         | 2     | SEV unsafe water                      | 162             |
| Gastritis and duodenitis | Female | 1-4 years | 95+ years | Data Rich  | -1        | 3     | Education (years per capita)          | 15              |
| Gastritis and duodenitis | Female | 1-4 years | 95+ years | Data Rich  | -1        | 3     | Socio-demographic Index               | 62              |
| Gastritis and duodenitis | Female | 1-4 years | 95+ years | Data Rich  | -1        | 3     | LDI (IS per capita)                   | --              |
| Gastritis and duodenitis | Female | 1-4 years | 95+ years | Global     | 1         | 1     | Cumulative Cigarettes (10 Years)      | 100             |
| Gastritis and duodenitis | Female | 1-4 years | 95+ years | Global     | 1         | 1     | Alcohol (liters per capita)           | --              |
| Gastritis and duodenitis | Female | 1-4 years | 95+ years | Global     | 1         | 1     | Cumulative Cigarettes (5 Years)       | --              |
| Gastritis and duodenitis | Female | 1-4 years | 95+ years | Global     | 1         | 1     | Smoking Prevalence                    | --              |
| Gastritis and duodenitis | Female | 1-4 years | 95+ years | Global     | -1        | 2     | Healthcare access and quality index   | 151             |
| Gastritis and duodenitis | Female | 1-4 years | 95+ years | Global     | -1        | 2     | Sanitation (proportion with access)   | 463             |
| Gastritis and duodenitis | Female | 1-4 years | 95+ years | Global     | 0         | 2     | vegetables adjusted(g)                | 614             |
| Gastritis and duodenitis | Female | 1-4 years | 95+ years | Global     | 1         | 2     | SEV unsafe water                      | --              |
| Gastritis and duodenitis | Female | 1-4 years | 95+ years | Global     | -1        | 3     | Socio-demographic Index               | 120             |
| Gastritis and duodenitis | Female | 1-4 years | 95+ years | Global     | -1        | 3     | Education (years per capita)          | --              |
| Gastritis and duodenitis | Female | 1-4 years | 95+ years | Global     | -1        | 3     | LDI (IS per capita)                   | --              |
| Gastritis and duodenitis | Male   | 1-4 years | 95+ years | Data Rich  | 1         | 1     | Cumulative Cigarettes (5 Years)       | 28              |
| Gastritis and duodenitis | Male   | 1-4 years | 95+ years | Data Rich  | 1         | 1     | Alcohol (liters per capita)           | 435             |
| Gastritis and duodenitis | Male   | 1-4 years | 95+ years | Data Rich  | 1         | 1     | Smoking Prevalence                    | 596             |
| Gastritis and duodenitis | Male   | 1-4 years | 95+ years | Data Rich  | 1         | 1     | Cumulative Cigarettes (10 Years)      | 671             |
| Gastritis and duodenitis | Male   | 1-4 years | 95+ years | Data Rich  | -1        | 2     | Healthcare access and quality index   | 9               |
| Gastritis and duodenitis | Male   | 1-4 years | 95+ years | Data Rich  | -1        | 2     | Sanitation (proportion with access)   | 164             |
| Gastritis and duodenitis | Male   | 1-4 years | 95+ years | Data Rich  | 0         | 2     | vegetables adjusted(g)                | 249             |
| Gastritis and duodenitis | Male   | 1-4 years | 95+ years | Data Rich  | 1         | 2     | SEV unsafe water                      | 16              |
| Gastritis and duodenitis | Male   | 1-4 years | 95+ years | Data Rich  | -1        | 3     | Education (years per capita)          | 5               |
| Gastritis and duodenitis | Male   | 1-4 years | 95+ years | Data Rich  | -1        | 3     | Socio-demographic Index               | 14              |
| Gastritis and duodenitis | Male   | 1-4 years | 95+ years | Data Rich  | -1        | 3     | LDI (IS per capita)                   | --              |
| Gastritis and duodenitis | Male   | 1-4 years | 95+ years | Global     | 1         | 1     | Cumulative Cigarettes (5 Years)       | 24              |
| Gastritis and duodenitis | Male   | 1-4 years | 95+ years | Global     | 1         | 1     | Alcohol (liters per capita)           | 241             |
| Gastritis and duodenitis | Male   | 1-4 years | 95+ years | Global     | 1         | 1     | Cumulative Cigarettes (10 Years)      | 465             |
| Gastritis and duodenitis | Male   | 1-4 years | 95+ years | Global     | 1         | 1     | Smoking Prevalence                    | 508             |
| Gastritis and duodenitis | Male   | 1-4 years | 95+ years | Global     | -1        | 2     | Healthcare access and quality index   | 83              |
| Gastritis and duodenitis | Male   | 1-4 years | 95+ years | Global     | -1        | 2     | Sanitation (proportion with access)   | 656             |
| Gastritis and duodenitis | Male   | 1-4 years | 95+ years | Global     | 0         | 2     | vegetables adjusted(g)                | 484             |
| Gastritis and duodenitis | Male   | 1-4 years | 95+ years | Global     | 1         | 2     | SEV unsafe water                      | 3               |
| Gastritis and duodenitis | Male   | 1-4 years | 95+ years | Global     | -1        | 3     | Socio-demographic Index               | 8               |
| Gastritis and duodenitis | Male   | 1-4 years | 95+ years | Global     | -1        | 3     | Education (years per capita)          | 12              |
| Gastritis and duodenitis | Male   | 1-4 years | 95+ years | Global     | -1        | 3     | LDI (IS per capita)                   | --              |
| Appendicitis             | Female | 1-4 years | 95+ years | Data Rich  | -1        | 2     | vegetables adjusted(g)                | 265             |
| Appendicitis             | Female | 1-4 years | 95+ years | Data Rich  | -1        | 2     | fruits adjusted(g)                    | 425             |
| Appendicitis             | Female | 1-4 years | 95+ years | Data Rich  | -1        | 2     | Healthcare access and quality index   | 595             |
| Appendicitis             | Female | 1-4 years | 95+ years | Data Rich  | -1        | 3     | Education (years per capita)          | 12              |
| Appendicitis             | Female | 1-4 years | 95+ years | Data Rich  | -1        | 3     | Socio-demographic Index               | 48              |
| Appendicitis             | Female | 1-4 years | 95+ years | Data Rich  | -1        | 3     | Health System Access (capped)         | 460             |
| Appendicitis             | Female | 1-4 years | 95+ years | Data Rich  | -1        | 3     | LDI (IS per capita)                   | --              |
| Appendicitis             | Female | 1-4 years | 95+ years | Global     | -1        | 2     | fruits adjusted(g)                    | 225             |
| Appendicitis             | Female | 1-4 years | 95+ years | Global     | -1        | 2     | vegetables adjusted(g)                | 433             |
| Appendicitis             | Female | 1-4 years | 95+ years | Global     | -1        | 2     | Healthcare access and quality index   | 653             |
| Appendicitis             | Female | 1-4 years | 95+ years | Global     | -1        | 3     | Education (years per capita)          | 94              |
| Appendicitis             | Female | 1-4 years | 95+ years | Global     | -1        | 3     | Health System Access (capped)         | 136             |
| Appendicitis             | Female | 1-4 years | 95+ years | Global     | -1        | 3     | Socio-demographic Index               | 310             |
| Appendicitis             | Female | 1-4 years | 95+ years | Global     | -1        | 3     | LDI (IS per capita)                   | --              |
| Appendicitis             | Male   | 1-4 years | 95+ years | Data Rich  | -1        | 2     | fruits adjusted(g)                    | 283             |
| Appendicitis             | Male   | 1-4 years | 95+ years | Data Rich  | -1        | 2     | vegetables adjusted(g)                | 557             |
| Appendicitis             | Male   | 1-4 years | 95+ years | Data Rich  | -1        | 2     | Healthcare access and quality index   | 654             |
| Appendicitis             | Male   | 1-4 years | 95+ years | Data Rich  | -1        | 3     | Education (years per capita)          | 12              |
| Appendicitis             | Male   | 1-4 years | 95+ years | Data Rich  | -1        | 3     | Health System Access (capped)         | 24              |
| Appendicitis             | Male   | 1-4 years | 95+ years | Data Rich  | -1        | 3     | Socio-demographic Index               | 502             |
| Appendicitis             | Male   | 1-4 years | 95+ years | Data Rich  | -1        | 3     | LDI (IS per capita)                   | --              |
| Appendicitis             | Male   | 1-4 years | 95+ years | Global     | -1        | 2     | vegetables adjusted(g)                | 217             |
| Appendicitis             | Male   | 1-4 years | 95+ years | Global     | -1        | 2     | fruits adjusted(g)                    | 394             |
| Appendicitis             | Male   | 1-4 years | 95+ years | Global     | -1        | 2     | Healthcare access and quality index   | 728             |
| Appendicitis             | Male   | 1-4 years | 95+ years | Global     | -1        | 3     | Education (years per capita)          | 58              |

**Appendix Table 9: CODEm covariates used, level of covariate, and expected direction of covariate by cause, sex, and age**

*Covariates that CODEm did not select during the covariate selection process have no draw counts listed.*

| Cause                                      | Sex    | Age Start | Age End   | Model Type | Direction | Level | Covariate Name                      | Number of Draws |
|--------------------------------------------|--------|-----------|-----------|------------|-----------|-------|-------------------------------------|-----------------|
| Appendicitis                               | Male   | 1-4 years | 95+ years | Global     | -1        | 3     | Health System Access (capped)       | 161             |
| Appendicitis                               | Male   | 1-4 years | 95+ years | Global     | -1        | 3     | Socio-demographic Index             | 257             |
| Appendicitis                               | Male   | 1-4 years | 95+ years | Global     | -1        | 3     | LDI (IS per capita)                 | --              |
| Paralytic ileus and intestinal obstruction | Female | 0-6 days  | 95+ years | Data Rich  | -1        | 2     | Healthcare access and quality index | 1000            |
| Paralytic ileus and intestinal obstruction | Female | 0-6 days  | 95+ years | Data Rich  | -1        | 2     | vegetables adjusted(g)              | 1000            |
| Paralytic ileus and intestinal obstruction | Female | 0-6 days  | 95+ years | Data Rich  | -1        | 2     | fruits adjusted(g)                  | --              |
| Paralytic ileus and intestinal obstruction | Female | 0-6 days  | 95+ years | Data Rich  | -1        | 3     | Education (years per capita)        | --              |
| Paralytic ileus and intestinal obstruction | Female | 0-6 days  | 95+ years | Data Rich  | -1        | 3     | Health System Access (capped)       | --              |
| Paralytic ileus and intestinal obstruction | Female | 0-6 days  | 95+ years | Data Rich  | -1        | 3     | LDI (IS per capita)                 | --              |
| Paralytic ileus and intestinal obstruction | Female | 0-6 days  | 95+ years | Data Rich  | -1        | 3     | Socio-demographic Index             | --              |
| Paralytic ileus and intestinal obstruction | Female | 0-6 days  | 95+ years | Global     | -1        | 2     | Healthcare access and quality index | 463             |
| Paralytic ileus and intestinal obstruction | Female | 0-6 days  | 95+ years | Global     | -1        | 2     | fruits adjusted(g)                  | 537             |
| Paralytic ileus and intestinal obstruction | Female | 0-6 days  | 95+ years | Global     | -1        | 2     | vegetables adjusted(g)              | 559             |
| Paralytic ileus and intestinal obstruction | Female | 0-6 days  | 95+ years | Global     | -1        | 3     | Socio-demographic Index             | 133             |
| Paralytic ileus and intestinal obstruction | Female | 0-6 days  | 95+ years | Global     | -1        | 3     | Education (years per capita)        | 166             |
| Paralytic ileus and intestinal obstruction | Female | 0-6 days  | 95+ years | Global     | -1        | 3     | Health System Access (capped)       | 166             |
| Paralytic ileus and intestinal obstruction | Female | 0-6 days  | 95+ years | Global     | -1        | 3     | LDI (IS per capita)                 | --              |
| Paralytic ileus and intestinal obstruction | Male   | 0-6 days  | 95+ years | Data Rich  | -1        | 2     | Healthcare access and quality index | 326             |
| Paralytic ileus and intestinal obstruction | Male   | 0-6 days  | 95+ years | Data Rich  | -1        | 2     | vegetables adjusted(g)              | 674             |
| Paralytic ileus and intestinal obstruction | Male   | 0-6 days  | 95+ years | Data Rich  | -1        | 2     | fruits adjusted(g)                  | --              |
| Paralytic ileus and intestinal obstruction | Male   | 0-6 days  | 95+ years | Data Rich  | -1        | 3     | Health System Access (capped)       | 222             |
| Paralytic ileus and intestinal obstruction | Male   | 0-6 days  | 95+ years | Data Rich  | -1        | 3     | Education (years per capita)        | 267             |
| Paralytic ileus and intestinal obstruction | Male   | 0-6 days  | 95+ years | Data Rich  | -1        | 3     | LDI (IS per capita)                 | --              |
| Paralytic ileus and intestinal obstruction | Male   | 0-6 days  | 95+ years | Data Rich  | -1        | 3     | Socio-demographic Index             | --              |
| Paralytic ileus and intestinal obstruction | Male   | 0-6 days  | 95+ years | Global     | -1        | 2     | vegetables adjusted(g)              | 514             |
| Paralytic ileus and intestinal obstruction | Male   | 0-6 days  | 95+ years | Global     | -1        | 2     | Healthcare access and quality index | 706             |
| Paralytic ileus and intestinal obstruction | Male   | 0-6 days  | 95+ years | Global     | -1        | 2     | fruits adjusted(g)                  | 796             |
| Paralytic ileus and intestinal obstruction | Male   | 0-6 days  | 95+ years | Global     | -1        | 3     | Socio-demographic Index             | 161             |
| Paralytic ileus and intestinal obstruction | Male   | 0-6 days  | 95+ years | Global     | -1        | 3     | Education (years per capita)        | --              |
| Paralytic ileus and intestinal obstruction | Male   | 0-6 days  | 95+ years | Global     | -1        | 3     | Health System Access (capped)       | --              |
| Paralytic ileus and intestinal obstruction | Male   | 0-6 days  | 95+ years | Global     | -1        | 3     | LDI (IS per capita)                 | --              |
| Inguinal, femoral, and abdominal hernia    | Female | 1-4 years | 95+ years | Data Rich  | -1        | 1     | Mean BMI                            | 751             |
| Inguinal, femoral, and abdominal hernia    | Female | 1-4 years | 95+ years | Data Rich  | 1         | 1     | Smoking Prevalence                  | 243             |
| Inguinal, femoral, and abdominal hernia    | Female | 1-4 years | 95+ years | Data Rich  | 1         | 1     | Cumulative Cigarettes (10 Years)    | 249             |
| Inguinal, femoral, and abdominal hernia    | Female | 1-4 years | 95+ years | Data Rich  | 1         | 1     | Cumulative Cigarettes (5 Years)     | --              |
| Inguinal, femoral, and abdominal hernia    | Female | 1-4 years | 95+ years | Data Rich  | -1        | 2     | Healthcare access and quality index | --              |
| Inguinal, femoral, and abdominal hernia    | Female | 1-4 years | 95+ years | Data Rich  | -1        | 3     | Education (years per capita)        | --              |
| Inguinal, femoral, and abdominal hernia    | Female | 1-4 years | 95+ years | Data Rich  | -1        | 3     | LDI (IS per capita)                 | --              |
| Inguinal, femoral, and abdominal hernia    | Female | 1-4 years | 95+ years | Data Rich  | 0         | 3     | Socio-demographic Index             | --              |
| Inguinal, femoral, and abdominal hernia    | Female | 1-4 years | 95+ years | Global     | -1        | 1     | Mean BMI                            | 816             |
| Inguinal, femoral, and abdominal hernia    | Female | 1-4 years | 95+ years | Global     | 1         | 1     | Cumulative Cigarettes (10 Years)    | 409             |
| Inguinal, femoral, and abdominal hernia    | Female | 1-4 years | 95+ years | Global     | 1         | 1     | Cumulative Cigarettes (5 Years)     | 485             |
| Inguinal, femoral, and abdominal hernia    | Female | 1-4 years | 95+ years | Global     | 1         | 1     | Smoking Prevalence                  | --              |
| Inguinal, femoral, and abdominal hernia    | Female | 1-4 years | 95+ years | Global     | -1        | 2     | Healthcare access and quality index | --              |
| Inguinal, femoral, and abdominal hernia    | Female | 1-4 years | 95+ years | Global     | -1        | 3     | Education (years per capita)        | 330             |
| Inguinal, femoral, and abdominal hernia    | Female | 1-4 years | 95+ years | Global     | -1        | 3     | LDI (IS per capita)                 | --              |
| Inguinal, femoral, and abdominal hernia    | Female | 1-4 years | 95+ years | Global     | 0         | 3     | Socio-demographic Index             | 227             |
| Inguinal, femoral, and abdominal hernia    | Male   | 1-4 years | 95+ years | Data Rich  | -1        | 1     | Mean BMI                            | 185             |
| Inguinal, femoral, and abdominal hernia    | Male   | 1-4 years | 95+ years | Data Rich  | 1         | 1     | Smoking Prevalence                  | 87              |
| Inguinal, femoral, and abdominal hernia    | Male   | 1-4 years | 95+ years | Data Rich  | 1         | 1     | Cumulative Cigarettes (10 Years)    | 175             |
| Inguinal, femoral, and abdominal hernia    | Male   | 1-4 years | 95+ years | Data Rich  | 1         | 1     | Cumulative Cigarettes (5 Years)     | 681             |
| Inguinal, femoral, and abdominal hernia    | Male   | 1-4 years | 95+ years | Data Rich  | -1        | 2     | Healthcare access and quality index | 430             |
| Inguinal, femoral, and abdominal hernia    | Male   | 1-4 years | 95+ years | Data Rich  | -1        | 3     | Education (years per capita)        | 496             |
| Inguinal, femoral, and abdominal hernia    | Male   | 1-4 years | 95+ years | Data Rich  | -1        | 3     | LDI (IS per capita)                 | --              |
| Inguinal, femoral, and abdominal hernia    | Male   | 1-4 years | 95+ years | Data Rich  | 0         | 3     | Socio-demographic Index             | 340             |
| Inguinal, femoral, and abdominal hernia    | Male   | 1-4 years | 95+ years | Global     | -1        | 1     | Mean BMI                            | 635             |
| Inguinal, femoral, and abdominal hernia    | Male   | 1-4 years | 95+ years | Global     | 1         | 1     | Cumulative Cigarettes (5 Years)     | 73              |
| Inguinal, femoral, and abdominal hernia    | Male   | 1-4 years | 95+ years | Global     | 1         | 1     | Cumulative Cigarettes (10 Years)    | 380             |
| Inguinal, femoral, and abdominal hernia    | Male   | 1-4 years | 95+ years | Global     | 1         | 1     | Smoking Prevalence                  | 560             |
| Inguinal, femoral, and abdominal hernia    | Male   | 1-4 years | 95+ years | Global     | -1        | 2     | Healthcare access and quality index | 67              |
| Inguinal, femoral, and abdominal hernia    | Male   | 1-4 years | 95+ years | Global     | -1        | 3     | Education (years per capita)        | 191             |
| Inguinal, femoral, and abdominal hernia    | Male   | 1-4 years | 95+ years | Global     | -1        | 3     | LDI (IS per capita)                 | --              |
| Inguinal, femoral, and abdominal hernia    | Male   | 1-4 years | 95+ years | Global     | 0         | 3     | Socio-demographic Index             | 361             |
| Inflammatory bowel disease                 | Female | 1-4 years | 95+ years | Data Rich  | -1        | 1     | fruits adjusted(g)                  | --              |
| Inflammatory bowel disease                 | Female | 1-4 years | 95+ years | Data Rich  | -1        | 1     | vegetables adjusted(g)              | --              |
| Inflammatory bowel disease                 | Female | 1-4 years | 95+ years | Data Rich  | 1         | 1     | saturated fats adjusted(percent)    | 455             |
| Inflammatory bowel disease                 | Female | 1-4 years | 95+ years | Data Rich  | 1         | 1     | red meats adjusted(g)               | --              |
| Inflammatory bowel disease                 | Female | 1-4 years | 95+ years | Data Rich  | -1        | 2     | Healthcare access and quality index | 411             |
| Inflammatory bowel disease                 | Female | 1-4 years | 95+ years | Data Rich  | -1        | 2     | Latitude 15 to 30 (proportion)      | --              |
| Inflammatory bowel disease                 | Female | 1-4 years | 95+ years | Data Rich  | 1         | 2     | Latitude Over 45 (proportion)       | 623             |
| Inflammatory bowel disease                 | Female | 1-4 years | 95+ years | Data Rich  | 1         | 2     | Latitude 30 to 45 (proportion)      | --              |
| Inflammatory bowel disease                 | Female | 1-4 years | 95+ years | Data Rich  | -1        | 3     | Education (years per capita)        | --              |
| Inflammatory bowel disease                 | Female | 1-4 years | 95+ years | Data Rich  | 0         | 3     | Socio-demographic Index             | 430             |
| Inflammatory bowel disease                 | Female | 1-4 years | 95+ years | Data Rich  | 0         | 3     | LDI (IS per capita)                 | --              |
| Inflammatory bowel disease                 | Female | 1-4 years | 95+ years | Global     | -1        | 1     | vegetables adjusted(g)              | 369             |
| Inflammatory bowel disease                 | Female | 1-4 years | 95+ years | Global     | -1        | 1     | fruits adjusted(g)                  | 428             |
| Inflammatory bowel disease                 | Female | 1-4 years | 95+ years | Global     | 1         | 1     | saturated fats adjusted(percent)    | 338             |
| Inflammatory bowel disease                 | Female | 1-4 years | 95+ years | Global     | 1         | 1     | red meats adjusted(g)               | --              |

**Appendix Table 9: CODEm covariates used, level of covariate, and expected direction of covariate by cause, sex, and age**

*Covariates that CODEm did not select during the covariate selection process have no draw counts listed.*

| Cause                         | Sex    | Age Start | Age End   | Model Type | Direction | Level | Covariate Name                                    | Number of Draws |
|-------------------------------|--------|-----------|-----------|------------|-----------|-------|---------------------------------------------------|-----------------|
| Inflammatory bowel disease    | Female | 1-4 years | 95+ years | Global     | -1        | 2     | Healthcare access and quality index               | 382             |
| Inflammatory bowel disease    | Female | 1-4 years | 95+ years | Global     | -1        | 2     | Latitude 15 to 30 (proportion)                    | --              |
| Inflammatory bowel disease    | Female | 1-4 years | 95+ years | Global     | 1         | 2     | Latitude Over 45 (proportion)                     | 501             |
| Inflammatory bowel disease    | Female | 1-4 years | 95+ years | Global     | 1         | 2     | Latitude 30 to 45 (proportion)                    | --              |
| Inflammatory bowel disease    | Female | 1-4 years | 95+ years | Global     | -1        | 3     | Education (years per capita)                      | 72              |
| Inflammatory bowel disease    | Female | 1-4 years | 95+ years | Global     | 0         | 3     | Socio-demographic Index                           | 281             |
| Inflammatory bowel disease    | Female | 1-4 years | 95+ years | Global     | 0         | 3     | LDI (IS per capita)                               | --              |
| Inflammatory bowel disease    | Male   | 1-4 years | 95+ years | Data Rich  | -1        | 1     | fruits adjusted(g)                                | 751             |
| Inflammatory bowel disease    | Male   | 1-4 years | 95+ years | Data Rich  | -1        | 1     | vegetables adjusted(g)                            | --              |
| Inflammatory bowel disease    | Male   | 1-4 years | 95+ years | Data Rich  | 1         | 1     | saturated fats adjusted(percent)                  | 249             |
| Inflammatory bowel disease    | Male   | 1-4 years | 95+ years | Data Rich  | 1         | 1     | red meats adjusted(g)                             | --              |
| Inflammatory bowel disease    | Male   | 1-4 years | 95+ years | Data Rich  | -1        | 2     | Healthcare access and quality index               | --              |
| Inflammatory bowel disease    | Male   | 1-4 years | 95+ years | Data Rich  | -1        | 2     | Latitude 15 to 30 (proportion)                    | --              |
| Inflammatory bowel disease    | Male   | 1-4 years | 95+ years | Data Rich  | 1         | 2     | Latitude Over 45 (proportion)                     | 485             |
| Inflammatory bowel disease    | Male   | 1-4 years | 95+ years | Data Rich  | 1         | 2     | Latitude 30 to 45 (proportion)                    | --              |
| Inflammatory bowel disease    | Male   | 1-4 years | 95+ years | Data Rich  | -1        | 3     | Education (years per capita)                      | 453             |
| Inflammatory bowel disease    | Male   | 1-4 years | 95+ years | Data Rich  | 0         | 3     | Socio-demographic Index                           | 453             |
| Inflammatory bowel disease    | Male   | 1-4 years | 95+ years | Data Rich  | 0         | 3     | LDI (IS per capita)                               | --              |
| Inflammatory bowel disease    | Male   | 1-4 years | 95+ years | Global     | -1        | 1     | fruits adjusted(g)                                | 337             |
| Inflammatory bowel disease    | Male   | 1-4 years | 95+ years | Global     | -1        | 1     | vegetables adjusted(g)                            | 432             |
| Inflammatory bowel disease    | Male   | 1-4 years | 95+ years | Global     | 1         | 1     | saturated fats adjusted(percent)                  | 342             |
| Inflammatory bowel disease    | Male   | 1-4 years | 95+ years | Global     | 1         | 1     | red meats adjusted(g)                             | --              |
| Inflammatory bowel disease    | Male   | 1-4 years | 95+ years | Global     | -1        | 2     | Healthcare access and quality index               | 387             |
| Inflammatory bowel disease    | Male   | 1-4 years | 95+ years | Global     | -1        | 2     | Latitude 15 to 30 (proportion)                    | --              |
| Inflammatory bowel disease    | Male   | 1-4 years | 95+ years | Global     | 1         | 2     | Latitude Over 45 (proportion)                     | 629             |
| Inflammatory bowel disease    | Male   | 1-4 years | 95+ years | Global     | 1         | 2     | Latitude 30 to 45 (proportion)                    | --              |
| Inflammatory bowel disease    | Male   | 1-4 years | 95+ years | Global     | -1        | 3     | Education (years per capita)                      | 66              |
| Inflammatory bowel disease    | Male   | 1-4 years | 95+ years | Global     | 0         | 3     | Socio-demographic Index                           | 305             |
| Inflammatory bowel disease    | Male   | 1-4 years | 95+ years | Global     | 0         | 3     | LDI (IS per capita)                               | --              |
| Vascular intestinal disorders | Female | 1-4 years | 95+ years | Data Rich  | 1         | 1     | saturated fats adjusted(percent)                  | 87              |
| Vascular intestinal disorders | Female | 1-4 years | 95+ years | Data Rich  | 1         | 1     | Diabetes Fasting Plasma Glucose (mmol/L)          | 496             |
| Vascular intestinal disorders | Female | 1-4 years | 95+ years | Data Rich  | 1         | 1     | Diabetes Age-Standardized Prevalence (proportion) | 504             |
| Vascular intestinal disorders | Female | 1-4 years | 95+ years | Data Rich  | 1         | 1     | Cholesterol (total, mean per capita)              | --              |
| Vascular intestinal disorders | Female | 1-4 years | 95+ years | Data Rich  | 1         | 1     | Systolic Blood Pressure (mmHg)                    | --              |
| Vascular intestinal disorders | Female | 1-4 years | 95+ years | Data Rich  | -1        | 2     | Healthcare access and quality index               | --              |
| Vascular intestinal disorders | Female | 1-4 years | 95+ years | Data Rich  | -1        | 2     | fruits adjusted(g)                                | --              |
| Vascular intestinal disorders | Female | 1-4 years | 95+ years | Data Rich  | -1        | 2     | vegetables adjusted(g)                            | --              |
| Vascular intestinal disorders | Female | 1-4 years | 95+ years | Data Rich  | 1         | 2     | Alcohol (liters per capita)                       | --              |
| Vascular intestinal disorders | Female | 1-4 years | 95+ years | Data Rich  | -1        | 3     | Education (years per capita)                      | --              |
| Vascular intestinal disorders | Female | 1-4 years | 95+ years | Data Rich  | -1        | 3     | LDI (IS per capita)                               | --              |
| Vascular intestinal disorders | Female | 1-4 years | 95+ years | Data Rich  | 0         | 3     | Socio-demographic Index                           | 262             |
| Vascular intestinal disorders | Female | 1-4 years | 95+ years | Data Rich  | 1         | 3     | Latitude Over 45 (proportion)                     | 535             |
| Vascular intestinal disorders | Female | 1-4 years | 95+ years | Global     | 1         | 1     | saturated fats adjusted(percent)                  | 330             |
| Vascular intestinal disorders | Female | 1-4 years | 95+ years | Global     | 1         | 1     | Diabetes Age-Standardized Prevalence (proportion) | 417             |
| Vascular intestinal disorders | Female | 1-4 years | 95+ years | Global     | 1         | 1     | Diabetes Fasting Plasma Glucose (mmol/L)          | 493             |
| Vascular intestinal disorders | Female | 1-4 years | 95+ years | Global     | 1         | 1     | Cholesterol (total, mean per capita)              | --              |
| Vascular intestinal disorders | Female | 1-4 years | 95+ years | Global     | 1         | 1     | Systolic Blood Pressure (mmHg)                    | --              |
| Vascular intestinal disorders | Female | 1-4 years | 95+ years | Global     | -1        | 2     | Healthcare access and quality index               | --              |
| Vascular intestinal disorders | Female | 1-4 years | 95+ years | Global     | -1        | 2     | fruits adjusted(g)                                | --              |
| Vascular intestinal disorders | Female | 1-4 years | 95+ years | Global     | -1        | 2     | vegetables adjusted(g)                            | --              |
| Vascular intestinal disorders | Female | 1-4 years | 95+ years | Global     | 1         | 2     | Alcohol (liters per capita)                       | --              |
| Vascular intestinal disorders | Female | 1-4 years | 95+ years | Global     | -1        | 3     | Education (years per capita)                      | --              |
| Vascular intestinal disorders | Female | 1-4 years | 95+ years | Global     | -1        | 3     | LDI (IS per capita)                               | --              |
| Vascular intestinal disorders | Female | 1-4 years | 95+ years | Global     | 0         | 3     | Socio-demographic Index                           | 102             |
| Vascular intestinal disorders | Female | 1-4 years | 95+ years | Global     | 1         | 3     | Latitude Over 45 (proportion)                     | 493             |
| Vascular intestinal disorders | Male   | 1-4 years | 95+ years | Data Rich  | 1         | 1     | saturated fats adjusted(percent)                  | 98              |
| Vascular intestinal disorders | Male   | 1-4 years | 95+ years | Data Rich  | 1         | 1     | Diabetes Fasting Plasma Glucose (mmol/L)          | 167             |
| Vascular intestinal disorders | Male   | 1-4 years | 95+ years | Data Rich  | 1         | 1     | Diabetes Age-Standardized Prevalence (proportion) | 572             |
| Vascular intestinal disorders | Male   | 1-4 years | 95+ years | Data Rich  | 1         | 1     | Cholesterol (total, mean per capita)              | --              |
| Vascular intestinal disorders | Male   | 1-4 years | 95+ years | Data Rich  | 1         | 1     | Systolic Blood Pressure (mmHg)                    | --              |
| Vascular intestinal disorders | Male   | 1-4 years | 95+ years | Data Rich  | -1        | 2     | Healthcare access and quality index               | --              |
| Vascular intestinal disorders | Male   | 1-4 years | 95+ years | Data Rich  | -1        | 2     | fruits adjusted(g)                                | --              |
| Vascular intestinal disorders | Male   | 1-4 years | 95+ years | Data Rich  | -1        | 2     | vegetables adjusted(g)                            | --              |
| Vascular intestinal disorders | Male   | 1-4 years | 95+ years | Data Rich  | 1         | 2     | Alcohol (liters per capita)                       | 523             |
| Vascular intestinal disorders | Male   | 1-4 years | 95+ years | Data Rich  | -1        | 3     | Education (years per capita)                      | --              |
| Vascular intestinal disorders | Male   | 1-4 years | 95+ years | Data Rich  | -1        | 3     | LDI (IS per capita)                               | --              |
| Vascular intestinal disorders | Male   | 1-4 years | 95+ years | Data Rich  | 0         | 3     | Socio-demographic Index                           | 180             |
| Vascular intestinal disorders | Male   | 1-4 years | 95+ years | Data Rich  | 1         | 3     | Latitude Over 45 (proportion)                     | 531             |
| Vascular intestinal disorders | Male   | 1-4 years | 95+ years | Global     | 1         | 1     | saturated fats adjusted(percent)                  | 331             |
| Vascular intestinal disorders | Male   | 1-4 years | 95+ years | Global     | 1         | 1     | Diabetes Fasting Plasma Glucose (mmol/L)          | 498             |
| Vascular intestinal disorders | Male   | 1-4 years | 95+ years | Global     | 1         | 1     | Diabetes Age-Standardized Prevalence (proportion) | 645             |
| Vascular intestinal disorders | Male   | 1-4 years | 95+ years | Global     | 1         | 1     | Cholesterol (total, mean per capita)              | --              |
| Vascular intestinal disorders | Male   | 1-4 years | 95+ years | Global     | 1         | 1     | Systolic Blood Pressure (mmHg)                    | --              |
| Vascular intestinal disorders | Male   | 1-4 years | 95+ years | Global     | -1        | 2     | vegetables adjusted(g)                            | 24              |
| Vascular intestinal disorders | Male   | 1-4 years | 95+ years | Global     | -1        | 2     | Healthcare access and quality index               | 29              |
| Vascular intestinal disorders | Male   | 1-4 years | 95+ years | Global     | -1        | 2     | fruits adjusted(g)                                | --              |
| Vascular intestinal disorders | Male   | 1-4 years | 95+ years | Global     | 1         | 2     | Alcohol (liters per capita)                       | 622             |
| Vascular intestinal disorders | Male   | 1-4 years | 95+ years | Global     | -1        | 3     | Education (years per capita)                      | --              |

**Appendix Table 9: CODEm covariates used, level of covariate, and expected direction of covariate by cause, sex, and age**

*Covariates that CODEm did not select during the covariate selection process have no draw counts listed.*

| Cause                            | Sex    | Age Start | Age End   | Model Type | Direction | Level | Covariate Name                                 | Number of Draws |
|----------------------------------|--------|-----------|-----------|------------|-----------|-------|------------------------------------------------|-----------------|
| Vascular intestinal disorders    | Male   | 1-4 years | 95+ years | Global     | -1        | 3     | LDI (IS per capita)                            | --              |
| Vascular intestinal disorders    | Male   | 1-4 years | 95+ years | Global     | 0         | 3     | Socio-demographic Index                        | 40              |
| Vascular intestinal disorders    | Male   | 1-4 years | 95+ years | Global     | 1         | 3     | Latitude Over 45 (proportion)                  | 536             |
| Gallbladder and biliary diseases | Female | 1-4 years | 95+ years | Data Rich  | 1         | 1     | saturated fats adjusted(percent)               | 408             |
| Gallbladder and biliary diseases | Female | 1-4 years | 95+ years | Data Rich  | 1         | 1     | Mean BMI                                       | 473             |
| Gallbladder and biliary diseases | Female | 1-4 years | 95+ years | Data Rich  | -1        | 2     | Healthcare access and quality index            | 365             |
| Gallbladder and biliary diseases | Female | 1-4 years | 95+ years | Data Rich  | 1         | 2     | red meats adjusted(g)                          | 365             |
| Gallbladder and biliary diseases | Female | 1-4 years | 95+ years | Data Rich  | 1         | 2     | Alcohol (liters per capita)                    | --              |
| Gallbladder and biliary diseases | Female | 1-4 years | 95+ years | Data Rich  | 1         | 2     | Population Over 65 (proportion)                | --              |
| Gallbladder and biliary diseases | Female | 1-4 years | 95+ years | Data Rich  | 0         | 3     | Socio-demographic Index                        | 263             |
| Gallbladder and biliary diseases | Female | 1-4 years | 95+ years | Data Rich  | 0         | 3     | Education (years per capita)                   | 304             |
| Gallbladder and biliary diseases | Female | 1-4 years | 95+ years | Data Rich  | 0         | 3     | LDI (IS per capita)                            | --              |
| Gallbladder and biliary diseases | Female | 1-4 years | 95+ years | Global     | 1         | 1     | Mean BMI                                       | 276             |
| Gallbladder and biliary diseases | Female | 1-4 years | 95+ years | Global     | 1         | 1     | saturated fats adjusted(percent)               | 813             |
| Gallbladder and biliary diseases | Female | 1-4 years | 95+ years | Global     | -1        | 2     | Healthcare access and quality index            | 650             |
| Gallbladder and biliary diseases | Female | 1-4 years | 95+ years | Global     | 1         | 2     | red meats adjusted(g)                          | 83              |
| Gallbladder and biliary diseases | Female | 1-4 years | 95+ years | Global     | 1         | 2     | Alcohol (liters per capita)                    | --              |
| Gallbladder and biliary diseases | Female | 1-4 years | 95+ years | Global     | 1         | 2     | Population Over 65 (proportion)                | --              |
| Gallbladder and biliary diseases | Female | 1-4 years | 95+ years | Global     | 0         | 3     | Socio-demographic Index                        | 530             |
| Gallbladder and biliary diseases | Female | 1-4 years | 95+ years | Global     | 0         | 3     | Education (years per capita)                   | 649             |
| Gallbladder and biliary diseases | Female | 1-4 years | 95+ years | Global     | 0         | 3     | LDI (IS per capita)                            | --              |
| Gallbladder and biliary diseases | Male   | 1-4 years | 95+ years | Data Rich  | 1         | 1     | Mean BMI                                       | 404             |
| Gallbladder and biliary diseases | Male   | 1-4 years | 95+ years | Data Rich  | 1         | 1     | saturated fats adjusted(percent)               | 966             |
| Gallbladder and biliary diseases | Male   | 1-4 years | 95+ years | Data Rich  | -1        | 2     | Healthcare access and quality index            | 3               |
| Gallbladder and biliary diseases | Male   | 1-4 years | 95+ years | Data Rich  | 1         | 2     | Alcohol (liters per capita)                    | 3               |
| Gallbladder and biliary diseases | Male   | 1-4 years | 95+ years | Data Rich  | 1         | 2     | red meats adjusted(g)                          | 25              |
| Gallbladder and biliary diseases | Male   | 1-4 years | 95+ years | Data Rich  | 1         | 2     | Population Over 65 (proportion)                | 492             |
| Gallbladder and biliary diseases | Male   | 1-4 years | 95+ years | Data Rich  | 0         | 3     | Education (years per capita)                   | 108             |
| Gallbladder and biliary diseases | Male   | 1-4 years | 95+ years | Data Rich  | 0         | 3     | Socio-demographic Index                        | 391             |
| Gallbladder and biliary diseases | Male   | 1-4 years | 95+ years | Data Rich  | 0         | 3     | LDI (IS per capita)                            | --              |
| Gallbladder and biliary diseases | Male   | 1-4 years | 95+ years | Global     | 1         | 1     | Mean BMI                                       | 417             |
| Gallbladder and biliary diseases | Male   | 1-4 years | 95+ years | Global     | 1         | 1     | saturated fats adjusted(percent)               | 713             |
| Gallbladder and biliary diseases | Male   | 1-4 years | 95+ years | Global     | -1        | 2     | Health System Access (capped)                  | 13              |
| Gallbladder and biliary diseases | Male   | 1-4 years | 95+ years | Global     | -1        | 2     | Healthcare access and quality index            | 200             |
| Gallbladder and biliary diseases | Male   | 1-4 years | 95+ years | Global     | 1         | 2     | red meats adjusted(g)                          | 104             |
| Gallbladder and biliary diseases | Male   | 1-4 years | 95+ years | Global     | 1         | 2     | Alcohol (liters per capita)                    | 248             |
| Gallbladder and biliary diseases | Male   | 1-4 years | 95+ years | Global     | 1         | 2     | Population Over 65 (proportion)                | 267             |
| Gallbladder and biliary diseases | Male   | 1-4 years | 95+ years | Global     | 0         | 3     | Education (years per capita)                   | 200             |
| Gallbladder and biliary diseases | Male   | 1-4 years | 95+ years | Global     | 0         | 3     | Socio-demographic Index                        | 233             |
| Gallbladder and biliary diseases | Male   | 1-4 years | 95+ years | Global     | 0         | 3     | LDI (IS per capita)                            | --              |
| Pancreatitis                     | Female | 1-4 years | 95+ years | Data Rich  | 1         | 1     | Log-transformed SEV scalar: Pancreatit         | 323             |
| Pancreatitis                     | Female | 1-4 years | 95+ years | Data Rich  | 1         | 1     | Alcohol (liters per capita)                    | --              |
| Pancreatitis                     | Female | 1-4 years | 95+ years | Data Rich  | -1        | 2     | Healthcare access and quality index            | 428             |
| Pancreatitis                     | Female | 1-4 years | 95+ years | Data Rich  | 1         | 2     | Mean BMI                                       | --              |
| Pancreatitis                     | Female | 1-4 years | 95+ years | Data Rich  | -1        | 3     | Education (years per capita)                   | 134             |
| Pancreatitis                     | Female | 1-4 years | 95+ years | Data Rich  | 0         | 3     | Socio-demographic Index                        | 358             |
| Pancreatitis                     | Female | 1-4 years | 95+ years | Data Rich  | 0         | 3     | LDI (IS per capita)                            | --              |
| Pancreatitis                     | Female | 1-4 years | 95+ years | Global     | 1         | 1     | Log-transformed SEV scalar: Pancreatit         | 282             |
| Pancreatitis                     | Female | 1-4 years | 95+ years | Global     | 1         | 1     | Alcohol (liters per capita)                    | --              |
| Pancreatitis                     | Female | 1-4 years | 95+ years | Global     | -1        | 2     | Healthcare access and quality index            | 424             |
| Pancreatitis                     | Female | 1-4 years | 95+ years | Global     | 1         | 2     | Mean BMI                                       | --              |
| Pancreatitis                     | Female | 1-4 years | 95+ years | Global     | -1        | 3     | Education (years per capita)                   | 133             |
| Pancreatitis                     | Female | 1-4 years | 95+ years | Global     | 0         | 3     | Socio-demographic Index                        | 392             |
| Pancreatitis                     | Female | 1-4 years | 95+ years | Global     | 0         | 3     | LDI (IS per capita)                            | --              |
| Pancreatitis                     | Male   | 1-4 years | 95+ years | Data Rich  | 1         | 1     | Log-transformed SEV scalar: Pancreatit         | 453             |
| Pancreatitis                     | Male   | 1-4 years | 95+ years | Data Rich  | 1         | 1     | Alcohol (liters per capita)                    | 547             |
| Pancreatitis                     | Male   | 1-4 years | 95+ years | Data Rich  | -1        | 2     | Healthcare access and quality index            | 74              |
| Pancreatitis                     | Male   | 1-4 years | 95+ years | Data Rich  | 1         | 2     | Mean BMI                                       | 706             |
| Pancreatitis                     | Male   | 1-4 years | 95+ years | Data Rich  | -1        | 3     | Education (years per capita)                   | 5               |
| Pancreatitis                     | Male   | 1-4 years | 95+ years | Data Rich  | 0         | 3     | Socio-demographic Index                        | 626             |
| Pancreatitis                     | Male   | 1-4 years | 95+ years | Data Rich  | 0         | 3     | LDI (IS per capita)                            | --              |
| Pancreatitis                     | Male   | 1-4 years | 95+ years | Global     | 1         | 1     | Alcohol (liters per capita)                    | 114             |
| Pancreatitis                     | Male   | 1-4 years | 95+ years | Global     | 1         | 1     | Log-transformed SEV scalar: Pancreatit         | 234             |
| Pancreatitis                     | Male   | 1-4 years | 95+ years | Global     | -1        | 2     | Health System Access (capped)                  | 54              |
| Pancreatitis                     | Male   | 1-4 years | 95+ years | Global     | -1        | 2     | Healthcare access and quality index            | 207             |
| Pancreatitis                     | Male   | 1-4 years | 95+ years | Global     | 1         | 2     | Mean BMI                                       | 513             |
| Pancreatitis                     | Male   | 1-4 years | 95+ years | Global     | -1        | 3     | Education (years per capita)                   | 52              |
| Pancreatitis                     | Male   | 1-4 years | 95+ years | Global     | 0         | 3     | Socio-demographic Index                        | 456             |
| Pancreatitis                     | Male   | 1-4 years | 95+ years | Global     | 0         | 3     | LDI (IS per capita)                            | --              |
| Other digestive diseases         | Female | 1-4 years | 95+ years | Data Rich  | 1         | 1     | Cumulative Cigarettes (5 Years)                | 19              |
| Other digestive diseases         | Female | 1-4 years | 95+ years | Data Rich  | 1         | 1     | Cumulative Cigarettes (10 Years)               | 28              |
| Other digestive diseases         | Female | 1-4 years | 95+ years | Data Rich  | 1         | 1     | Alcohol (liters per capita)                    | 451             |
| Other digestive diseases         | Female | 1-4 years | 95+ years | Data Rich  | 1         | 1     | Smoking Prevalence                             | 906             |
| Other digestive diseases         | Female | 1-4 years | 95+ years | Data Rich  | -1        | 2     | Healthcare access and quality index            | --              |
| Other digestive diseases         | Female | 1-4 years | 95+ years | Data Rich  | -1        | 2     | Improved Water Source (proportion with access) | --              |
| Other digestive diseases         | Female | 1-4 years | 95+ years | Data Rich  | -1        | 2     | Sanitation (proportion with access)            | --              |
| Other digestive diseases         | Female | 1-4 years | 95+ years | Data Rich  | -1        | 2     | fruits adjusted(g)                             | --              |
| Other digestive diseases         | Female | 1-4 years | 95+ years | Data Rich  | 0         | 2     | vegetables adjusted(g)                         | 256             |



**Appendix Table 9: CODEm covariates used, level of covariate, and expected direction of covariate by cause, sex, and age**

*Covariates that CODEm did not select during the covariate selection process have no draw counts listed.*

| Cause                                   | Sex    | Age Start   | Age End   | Model Type | Direction | Level | Covariate Name                                       | Number of Draws |
|-----------------------------------------|--------|-------------|-----------|------------|-----------|-------|------------------------------------------------------|-----------------|
| Other digestive diseases                | Female | 1-4 years   | 95+ years | Data Rich  | 1         | 2     | Diabetes Age-Standardized Prevalence (proportion)    | 98              |
| Other digestive diseases                | Female | 1-4 years   | 95+ years | Data Rich  | 1         | 2     | Mean BMI                                             | 420             |
| Other digestive diseases                | Female | 1-4 years   | 95+ years | Data Rich  | 1         | 2     | red meats adjusted(g)                                | --              |
| Other digestive diseases                | Female | 1-4 years   | 95+ years | Data Rich  | 1         | 2     | saturated fats adjusted(percent)                     | --              |
| Other digestive diseases                | Female | 1-4 years   | 95+ years | Data Rich  | -1        | 3     | Health System Access 2 (unitless)                    | 192             |
| Other digestive diseases                | Female | 1-4 years   | 95+ years | Data Rich  | -1        | 3     | Education (years per capita)                         | --              |
| Other digestive diseases                | Female | 1-4 years   | 95+ years | Data Rich  | -1        | 3     | LDI (I\$ per capita)                                 | --              |
| Other digestive diseases                | Female | 1-4 years   | 95+ years | Data Rich  | 0         | 3     | Socio-demographic Index                              | 547             |
| Other digestive diseases                | Female | 1-4 years   | 95+ years | Global     | 1         | 1     | Alcohol (liters per capita)                          | 659             |
| Other digestive diseases                | Female | 1-4 years   | 95+ years | Global     | 1         | 1     | Smoking Prevalence                                   | 767             |
| Other digestive diseases                | Female | 1-4 years   | 95+ years | Global     | 1         | 1     | Cumulative Cigarettes (10 Years)                     | --              |
| Other digestive diseases                | Female | 1-4 years   | 95+ years | Global     | 1         | 1     | Cumulative Cigarettes (5 Years)                      | --              |
| Other digestive diseases                | Female | 1-4 years   | 95+ years | Global     | -1        | 2     | Improved Water Source (proportion with access)       | 7               |
| Other digestive diseases                | Female | 1-4 years   | 95+ years | Global     | -1        | 2     | Sanitation (proportion with access)                  | 12              |
| Other digestive diseases                | Female | 1-4 years   | 95+ years | Global     | -1        | 2     | fruits adjusted(g)                                   | 12              |
| Other digestive diseases                | Female | 1-4 years   | 95+ years | Global     | -1        | 2     | Healthcare access and quality index                  | 15              |
| Other digestive diseases                | Female | 1-4 years   | 95+ years | Global     | 0         | 2     | vegetables adjusted(g)                               | 596             |
| Other digestive diseases                | Female | 1-4 years   | 95+ years | Global     | 1         | 2     | Mean BMI                                             | 720             |
| Other digestive diseases                | Female | 1-4 years   | 95+ years | Global     | 1         | 2     | Diabetes Age-Standardized Prevalence (proportion)    | --              |
| Other digestive diseases                | Female | 1-4 years   | 95+ years | Global     | 1         | 2     | red meats adjusted(g)                                | --              |
| Other digestive diseases                | Female | 1-4 years   | 95+ years | Global     | 1         | 2     | saturated fats adjusted(percent)                     | --              |
| Other digestive diseases                | Female | 1-4 years   | 95+ years | Global     | -1        | 3     | Education (years per capita)                         | 10              |
| Other digestive diseases                | Female | 1-4 years   | 95+ years | Global     | -1        | 3     | Health System Access 2 (unitless)                    | 416             |
| Other digestive diseases                | Female | 1-4 years   | 95+ years | Global     | -1        | 3     | LDI (I\$ per capita)                                 | --              |
| Other digestive diseases                | Female | 1-4 years   | 95+ years | Global     | 0         | 3     | Socio-demographic Index                              | 610             |
| Other digestive diseases                | Male   | 1-4 years   | 95+ years | Data Rich  | 1         | 1     | Cumulative Cigarettes (5 Years)                      | 40              |
| Other digestive diseases                | Male   | 1-4 years   | 95+ years | Data Rich  | 1         | 1     | Smoking Prevalence                                   | 288             |
| Other digestive diseases                | Male   | 1-4 years   | 95+ years | Data Rich  | 1         | 1     | Alcohol (liters per capita)                          | 924             |
| Other digestive diseases                | Male   | 1-4 years   | 95+ years | Data Rich  | 1         | 1     | Cumulative Cigarettes (10 Years)                     | --              |
| Other digestive diseases                | Male   | 1-4 years   | 95+ years | Data Rich  | -1        | 2     | Healthcare access and quality index                  | --              |
| Other digestive diseases                | Male   | 1-4 years   | 95+ years | Data Rich  | -1        | 2     | Improved Water Source (proportion with access)       | --              |
| Other digestive diseases                | Male   | 1-4 years   | 95+ years | Data Rich  | -1        | 2     | Sanitation (proportion with access)                  | --              |
| Other digestive diseases                | Male   | 1-4 years   | 95+ years | Data Rich  | -1        | 2     | fruits adjusted(g)                                   | --              |
| Other digestive diseases                | Male   | 1-4 years   | 95+ years | Data Rich  | 0         | 2     | vegetables adjusted(g)                               | 263             |
| Other digestive diseases                | Male   | 1-4 years   | 95+ years | Data Rich  | 1         | 2     | Diabetes Age-Standardized Prevalence (proportion)    | 409             |
| Other digestive diseases                | Male   | 1-4 years   | 95+ years | Data Rich  | 1         | 2     | Mean BMI                                             | 592             |
| Other digestive diseases                | Male   | 1-4 years   | 95+ years | Data Rich  | 1         | 2     | red meats adjusted(g)                                | --              |
| Other digestive diseases                | Male   | 1-4 years   | 95+ years | Data Rich  | 1         | 2     | saturated fats adjusted(percent)                     | --              |
| Other digestive diseases                | Male   | 1-4 years   | 95+ years | Data Rich  | -1        | 3     | Health System Access 2 (unitless)                    | 303             |
| Other digestive diseases                | Male   | 1-4 years   | 95+ years | Data Rich  | -1        | 3     | Education (years per capita)                         | --              |
| Other digestive diseases                | Male   | 1-4 years   | 95+ years | Data Rich  | -1        | 3     | LDI (I\$ per capita)                                 | --              |
| Other digestive diseases                | Male   | 1-4 years   | 95+ years | Data Rich  | 0         | 3     | Socio-demographic Index                              | 437             |
| Other digestive diseases                | Male   | 1-4 years   | 95+ years | Global     | 1         | 1     | Smoking Prevalence                                   | 50              |
| Other digestive diseases                | Male   | 1-4 years   | 95+ years | Global     | 1         | 1     | Cumulative Cigarettes (5 Years)                      | 96              |
| Other digestive diseases                | Male   | 1-4 years   | 95+ years | Global     | 1         | 1     | Cumulative Cigarettes (10 Years)                     | 175             |
| Other digestive diseases                | Male   | 1-4 years   | 95+ years | Global     | 1         | 1     | Alcohol (liters per capita)                          | 854             |
| Other digestive diseases                | Male   | 1-4 years   | 95+ years | Global     | -1        | 2     | Healthcare access and quality index                  | 67              |
| Other digestive diseases                | Male   | 1-4 years   | 95+ years | Global     | -1        | 2     | Improved Water Source (proportion with access)       | 82              |
| Other digestive diseases                | Male   | 1-4 years   | 95+ years | Global     | -1        | 2     | Sanitation (proportion with access)                  | 88              |
| Other digestive diseases                | Male   | 1-4 years   | 95+ years | Global     | -1        | 2     | fruits adjusted(g)                                   | 93              |
| Other digestive diseases                | Male   | 1-4 years   | 95+ years | Global     | 0         | 2     | vegetables adjusted(g)                               | 470             |
| Other digestive diseases                | Male   | 1-4 years   | 95+ years | Global     | 1         | 2     | Mean BMI                                             | 326             |
| Other digestive diseases                | Male   | 1-4 years   | 95+ years | Global     | 1         | 2     | Diabetes Age-Standardized Prevalence (proportion)    | --              |
| Other digestive diseases                | Male   | 1-4 years   | 95+ years | Global     | 1         | 2     | red meats adjusted(g)                                | --              |
| Other digestive diseases                | Male   | 1-4 years   | 95+ years | Global     | 1         | 2     | saturated fats adjusted(percent)                     | --              |
| Other digestive diseases                | Male   | 1-4 years   | 95+ years | Global     | -1        | 3     | Education (years per capita)                         | 47              |
| Other digestive diseases                | Male   | 1-4 years   | 95+ years | Global     | -1        | 3     | Health System Access 2 (unitless)                    | 233             |
| Other digestive diseases                | Male   | 1-4 years   | 95+ years | Global     | -1        | 3     | LDI (I\$ per capita)                                 | --              |
| Other digestive diseases                | Male   | 1-4 years   | 95+ years | Global     | 0         | 3     | Socio-demographic Index                              | 407             |
| Alzheimer's disease and other dementias | Female | 40-44 years | 95+ years | Data Rich  | -1        | 1     | Education (years per capita)                         | 125             |
| Alzheimer's disease and other dementias | Female | 40-44 years | 95+ years | Data Rich  | 1         | 1     | Systolic Blood Pressure (mmHg)                       | 0               |
| Alzheimer's disease and other dementias | Female | 40-44 years | 95+ years | Data Rich  | 1         | 1     | Diabetes Age-Specific Prevalence (proportion)        | 214             |
| Alzheimer's disease and other dementias | Female | 40-44 years | 95+ years | Data Rich  | 1         | 1     | Smoking Prevalence                                   | 673             |
| Alzheimer's disease and other dementias | Female | 40-44 years | 95+ years | Data Rich  | 1         | 1     | Mean BMI                                             | 685             |
| Alzheimer's disease and other dementias | Female | 40-44 years | 95+ years | Data Rich  | 1         | 1     | Cholesterol (total, mean per capita)                 | --              |
| Alzheimer's disease and other dementias | Female | 40-44 years | 95+ years | Data Rich  | -1        | 2     | Total Physical Activity (MET-min/week), Age-specific | 178             |
| Alzheimer's disease and other dementias | Female | 40-44 years | 95+ years | Data Rich  | -1        | 2     | Healthcare access and quality index                  | 378             |
| Alzheimer's disease and other dementias | Female | 40-44 years | 95+ years | Data Rich  | 1         | 2     | red meats adjusted(g)                                | 138             |
| Alzheimer's disease and other dementias | Female | 40-44 years | 95+ years | Data Rich  | 1         | 2     | Latitude Over 45 (proportion)                        | 222             |
| Alzheimer's disease and other dementias | Female | 40-44 years | 95+ years | Data Rich  | 1         | 2     | Outdoor Air Pollution (PM2.5)                        | --              |
| Alzheimer's disease and other dementias | Female | 40-44 years | 95+ years | Data Rich  | -1        | 3     | Sanitation (proportion with access)                  | 54              |
| Alzheimer's disease and other dementias | Female | 40-44 years | 95+ years | Data Rich  | -1        | 3     | Improved Water Source (proportion with access)       | 243             |
| Alzheimer's disease and other dementias | Female | 40-44 years | 95+ years | Data Rich  | 0         | 3     | LDI (I\$ per capita)                                 | --              |
| Alzheimer's disease and other dementias | Female | 40-44 years | 95+ years | Global     | -1        | 1     | Education (years per capita)                         | 314             |
| Alzheimer's disease and other dementias | Female | 40-44 years | 95+ years | Global     | 1         | 1     | Systolic Blood Pressure (mmHg)                       | 7               |
| Alzheimer's disease and other dementias | Female | 40-44 years | 95+ years | Global     | 1         | 1     | Diabetes Age-Specific Prevalence (proportion)        | 104             |
| Alzheimer's disease and other dementias | Female | 40-44 years | 95+ years | Global     | 1         | 1     | Mean BMI                                             | 487             |
| Alzheimer's disease and other dementias | Female | 40-44 years | 95+ years | Global     | 1         | 1     | Smoking Prevalence                                   | 578             |

**Appendix Table 9: CODEm covariates used, level of covariate, and expected direction of covariate by cause, sex, and age**

*Covariates that CODEm did not select during the covariate selection process have no draw counts listed.*

| Cause                                   | Sex    | Age Start   | Age End   | Model Type | Direction | Level | Covariate Name                                       | Number of Draws |
|-----------------------------------------|--------|-------------|-----------|------------|-----------|-------|------------------------------------------------------|-----------------|
| Alzheimer's disease and other dementias | Female | 40-44 years | 95+ years | Global     | 1         | 1     | Cholesterol (total, mean per capita)                 | --              |
| Alzheimer's disease and other dementias | Female | 40-44 years | 95+ years | Global     | -1        | 2     | Healthcare access and quality index                  | 141             |
| Alzheimer's disease and other dementias | Female | 40-44 years | 95+ years | Global     | -1        | 2     | Total Physical Activity (MET-min/week), Age-specific | 294             |
| Alzheimer's disease and other dementias | Female | 40-44 years | 95+ years | Global     | 1         | 2     | red meats adjusted(g)                                | 138             |
| Alzheimer's disease and other dementias | Female | 40-44 years | 95+ years | Global     | 1         | 2     | Latitude Over 45 (proportion)                        | 246             |
| Alzheimer's disease and other dementias | Female | 40-44 years | 95+ years | Global     | 1         | 2     | Outdoor Air Pollution (PM2.5)                        | --              |
| Alzheimer's disease and other dementias | Female | 40-44 years | 95+ years | Global     | -1        | 3     | Sanitation (proportion with access)                  | 123             |
| Alzheimer's disease and other dementias | Female | 40-44 years | 95+ years | Global     | -1        | 3     | Improved Water Source (proportion with access)       | 221             |
| Alzheimer's disease and other dementias | Female | 40-44 years | 95+ years | Global     | 0         | 3     | LDI (IS per capita)                                  | --              |
| Alzheimer's disease and other dementias | Male   | 40-44 years | 95+ years | Data Rich  | -1        | 1     | Education (years per capita)                         | 87              |
| Alzheimer's disease and other dementias | Male   | 40-44 years | 95+ years | Data Rich  | 1         | 1     | Diabetes Age-Specific Prevalence (proportion)        | 23              |
| Alzheimer's disease and other dementias | Male   | 40-44 years | 95+ years | Data Rich  | 1         | 1     | Smoking Prevalence                                   | 278             |
| Alzheimer's disease and other dementias | Male   | 40-44 years | 95+ years | Data Rich  | 1         | 1     | Mean BMI                                             | 687             |
| Alzheimer's disease and other dementias | Male   | 40-44 years | 95+ years | Data Rich  | 1         | 1     | Cholesterol (total, mean per capita)                 | --              |
| Alzheimer's disease and other dementias | Male   | 40-44 years | 95+ years | Data Rich  | 1         | 1     | Systolic Blood Pressure (mmHg)                       | --              |
| Alzheimer's disease and other dementias | Male   | 40-44 years | 95+ years | Data Rich  | -1        | 2     | Healthcare access and quality index                  | 0               |
| Alzheimer's disease and other dementias | Male   | 40-44 years | 95+ years | Data Rich  | -1        | 2     | Total Physical Activity (MET-min/week), Age-specific | --              |
| Alzheimer's disease and other dementias | Male   | 40-44 years | 95+ years | Data Rich  | 1         | 2     | red meats adjusted(g)                                | 115             |
| Alzheimer's disease and other dementias | Male   | 40-44 years | 95+ years | Data Rich  | 1         | 2     | Latitude Over 45 (proportion)                        | 296             |
| Alzheimer's disease and other dementias | Male   | 40-44 years | 95+ years | Data Rich  | 1         | 2     | Outdoor Air Pollution (PM2.5)                        | --              |
| Alzheimer's disease and other dementias | Male   | 40-44 years | 95+ years | Data Rich  | -1        | 3     | Sanitation (proportion with access)                  | 138             |
| Alzheimer's disease and other dementias | Male   | 40-44 years | 95+ years | Data Rich  | -1        | 3     | Improved Water Source (proportion with access)       | 194             |
| Alzheimer's disease and other dementias | Male   | 40-44 years | 95+ years | Data Rich  | 0         | 3     | LDI (IS per capita)                                  | --              |
| Alzheimer's disease and other dementias | Male   | 40-44 years | 95+ years | Global     | -1        | 1     | Education (years per capita)                         | 273             |
| Alzheimer's disease and other dementias | Male   | 40-44 years | 95+ years | Global     | 1         | 1     | Smoking Prevalence                                   | 54              |
| Alzheimer's disease and other dementias | Male   | 40-44 years | 95+ years | Global     | 1         | 1     | Diabetes Age-Specific Prevalence (proportion)        | 524             |
| Alzheimer's disease and other dementias | Male   | 40-44 years | 95+ years | Global     | 1         | 1     | Mean BMI                                             | 547             |
| Alzheimer's disease and other dementias | Male   | 40-44 years | 95+ years | Global     | 1         | 1     | Cholesterol (total, mean per capita)                 | --              |
| Alzheimer's disease and other dementias | Male   | 40-44 years | 95+ years | Global     | 1         | 1     | Systolic Blood Pressure (mmHg)                       | --              |
| Alzheimer's disease and other dementias | Male   | 40-44 years | 95+ years | Global     | -1        | 2     | Healthcare access and quality index                  | 5               |
| Alzheimer's disease and other dementias | Male   | 40-44 years | 95+ years | Global     | -1        | 2     | Total Physical Activity (MET-min/week), Age-specific | --              |
| Alzheimer's disease and other dementias | Male   | 40-44 years | 95+ years | Global     | 1         | 2     | red meats adjusted(g)                                | 72              |
| Alzheimer's disease and other dementias | Male   | 40-44 years | 95+ years | Global     | 1         | 2     | Latitude Over 45 (proportion)                        | 670             |
| Alzheimer's disease and other dementias | Male   | 40-44 years | 95+ years | Global     | 1         | 2     | Outdoor Air Pollution (PM2.5)                        | --              |
| Alzheimer's disease and other dementias | Male   | 40-44 years | 95+ years | Global     | -1        | 3     | Sanitation (proportion with access)                  | 87              |
| Alzheimer's disease and other dementias | Male   | 40-44 years | 95+ years | Global     | -1        | 3     | Improved Water Source (proportion with access)       | 98              |
| Alzheimer's disease and other dementias | Male   | 40-44 years | 95+ years | Global     | 0         | 3     | LDI (IS per capita)                                  | --              |
| Parkinson's disease                     | Female | 20-24 years | 95+ years | Data Rich  | -1        | 1     | Cumulative Cigarettes (10 Years)                     | 704             |
| Parkinson's disease                     | Female | 20-24 years | 95+ years | Data Rich  | -1        | 2     | fruits adjusted(g)                                   | 17              |
| Parkinson's disease                     | Female | 20-24 years | 95+ years | Data Rich  | -1        | 2     | Healthcare access and quality index                  | --              |
| Parkinson's disease                     | Female | 20-24 years | 95+ years | Data Rich  | 0         | 2     | Improved Water Source (proportion with access)       | 410             |
| Parkinson's disease                     | Female | 20-24 years | 95+ years | Data Rich  | 0         | 2     | Sanitation (proportion with access)                  | 419             |
| Parkinson's disease                     | Female | 20-24 years | 95+ years | Data Rich  | 1         | 2     | Absolute value of average latitude                   | --              |
| Parkinson's disease                     | Female | 20-24 years | 95+ years | Data Rich  | 1         | 2     | Cholesterol (total, mean per capita)                 | --              |
| Parkinson's disease                     | Female | 20-24 years | 95+ years | Data Rich  | -1        | 3     | Education (years per capita)                         | 83              |
| Parkinson's disease                     | Female | 20-24 years | 95+ years | Data Rich  | 0         | 3     | LDI (IS per capita)                                  | --              |
| Parkinson's disease                     | Female | 20-24 years | 95+ years | Data Rich  | 1         | 3     | Socio-demographic Index                              | 259             |
| Parkinson's disease                     | Female | 20-24 years | 95+ years | Global     | -1        | 1     | Cumulative Cigarettes (10 Years)                     | 680             |
| Parkinson's disease                     | Female | 20-24 years | 95+ years | Global     | -1        | 2     | Healthcare access and quality index                  | 188             |
| Parkinson's disease                     | Female | 20-24 years | 95+ years | Global     | -1        | 2     | fruits adjusted(g)                                   | --              |
| Parkinson's disease                     | Female | 20-24 years | 95+ years | Global     | 0         | 2     | Improved Water Source (proportion with access)       | 553             |
| Parkinson's disease                     | Female | 20-24 years | 95+ years | Global     | 0         | 2     | Sanitation (proportion with access)                  | 553             |
| Parkinson's disease                     | Female | 20-24 years | 95+ years | Global     | 1         | 2     | Cholesterol (total, mean per capita)                 | 77              |
| Parkinson's disease                     | Female | 20-24 years | 95+ years | Global     | 1         | 2     | Absolute value of average latitude                   | 265             |
| Parkinson's disease                     | Female | 20-24 years | 95+ years | Global     | -1        | 3     | Education (years per capita)                         | 66              |
| Parkinson's disease                     | Female | 20-24 years | 95+ years | Global     | 0         | 3     | LDI (IS per capita)                                  | --              |
| Parkinson's disease                     | Female | 20-24 years | 95+ years | Global     | 1         | 3     | Socio-demographic Index                              | 406             |
| Parkinson's disease                     | Male   | 20-24 years | 95+ years | Data Rich  | -1        | 1     | Cumulative Cigarettes (10 Years)                     | 300             |
| Parkinson's disease                     | Male   | 20-24 years | 95+ years | Data Rich  | -1        | 2     | fruits adjusted(g)                                   | 119             |
| Parkinson's disease                     | Male   | 20-24 years | 95+ years | Data Rich  | -1        | 2     | Healthcare access and quality index                  | --              |
| Parkinson's disease                     | Male   | 20-24 years | 95+ years | Data Rich  | 0         | 2     | Improved Water Source (proportion with access)       | 599             |
| Parkinson's disease                     | Male   | 20-24 years | 95+ years | Data Rich  | 0         | 2     | Sanitation (proportion with access)                  | --              |
| Parkinson's disease                     | Male   | 20-24 years | 95+ years | Data Rich  | 1         | 2     | Absolute value of average latitude                   | 119             |
| Parkinson's disease                     | Male   | 20-24 years | 95+ years | Data Rich  | 1         | 2     | Cholesterol (total, mean per capita)                 | --              |
| Parkinson's disease                     | Male   | 20-24 years | 95+ years | Data Rich  | -1        | 3     | Education (years per capita)                         | --              |
| Parkinson's disease                     | Male   | 20-24 years | 95+ years | Data Rich  | 0         | 3     | LDI (IS per capita)                                  | --              |
| Parkinson's disease                     | Male   | 20-24 years | 95+ years | Data Rich  | 1         | 3     | Socio-demographic Index                              | 496             |
| Parkinson's disease                     | Male   | 20-24 years | 95+ years | Global     | -1        | 1     | Cumulative Cigarettes (10 Years)                     | 1000            |
| Parkinson's disease                     | Male   | 20-24 years | 95+ years | Global     | -1        | 2     | Healthcare access and quality index                  | 130             |
| Parkinson's disease                     | Male   | 20-24 years | 95+ years | Global     | -1        | 2     | fruits adjusted(g)                                   | 130             |
| Parkinson's disease                     | Male   | 20-24 years | 95+ years | Global     | 0         | 2     | Sanitation (proportion with access)                  | 312             |
| Parkinson's disease                     | Male   | 20-24 years | 95+ years | Global     | 0         | 2     | Improved Water Source (proportion with access)       | 372             |
| Parkinson's disease                     | Male   | 20-24 years | 95+ years | Global     | 1         | 2     | Absolute value of average latitude                   | 130             |
| Parkinson's disease                     | Male   | 20-24 years | 95+ years | Global     | 1         | 2     | Cholesterol (total, mean per capita)                 | --              |
| Parkinson's disease                     | Male   | 20-24 years | 95+ years | Global     | -1        | 3     | Education (years per capita)                         | --              |
| Parkinson's disease                     | Male   | 20-24 years | 95+ years | Global     | 0         | 3     | LDI (IS per capita)                                  | --              |
| Parkinson's disease                     | Male   | 20-24 years | 95+ years | Global     | 1         | 3     | Socio-demographic Index                              | 398             |
| Epilepsy                                | Female | 28-364 days | 95+ years | Data Rich  | 1         | 1     | Log-transformed SEV scalar: Epilepsy                 | 108             |



**Appendix Table 9: CODEm covariates used, level of covariate, and expected direction of covariate by cause, sex, and age**

*Covariates that CODEm did not select during the covariate selection process have no draw counts listed.*

| Cause              | Sex    | Age Start   | Age End   | Model Type | Direction | Level | Covariate Name                       | Number of Draws |
|--------------------|--------|-------------|-----------|------------|-----------|-------|--------------------------------------|-----------------|
| Epilepsy           | Female | 28-364 days | 95+ years | Data Rich  | 1         | 1     | Pig Meat (kg per capita)             | 630             |
| Epilepsy           | Female | 28-364 days | 95+ years | Data Rich  | 1         | 1     | Pigs (per capita)                    | 687             |
| Epilepsy           | Female | 28-364 days | 95+ years | Data Rich  | 1         | 1     | Systolic Blood Pressure (mmHg)       | --              |
| Epilepsy           | Female | 28-364 days | 95+ years | Data Rich  | -1        | 2     | Healthcare access and quality index  | 28              |
| Epilepsy           | Female | 28-364 days | 95+ years | Data Rich  | 1         | 2     | Mean BMI                             | 582             |
| Epilepsy           | Female | 28-364 days | 95+ years | Data Rich  | 1         | 2     | Cholesterol (total, mean per capita) | --              |
| Epilepsy           | Female | 28-364 days | 95+ years | Data Rich  | -1        | 3     | Education (years per capita)         | 12              |
| Epilepsy           | Female | 28-364 days | 95+ years | Data Rich  | -1        | 3     | Socio-demographic Index              | 16              |
| Epilepsy           | Female | 28-364 days | 95+ years | Data Rich  | -1        | 3     | LDI (IS per capita)                  | --              |
| Epilepsy           | Female | 28-364 days | 95+ years | Data Rich  | 1         | 3     | Cumulative Cigarettes (10 Years)     | --              |
| Epilepsy           | Female | 28-364 days | 95+ years | Data Rich  | 1         | 3     | Cumulative Cigarettes (5 Years)      | --              |
| Epilepsy           | Female | 28-364 days | 95+ years | Global     | 1         | 1     | Log-transformed SEV scalar: Epilepsy | 157             |
| Epilepsy           | Female | 28-364 days | 95+ years | Global     | 1         | 1     | Pig Meat (kg per capita)             | 493             |
| Epilepsy           | Female | 28-364 days | 95+ years | Global     | 1         | 1     | Pigs (per capita)                    | 667             |
| Epilepsy           | Female | 28-364 days | 95+ years | Global     | 1         | 1     | Systolic Blood Pressure (mmHg)       | --              |
| Epilepsy           | Female | 28-364 days | 95+ years | Global     | -1        | 2     | Healthcare access and quality index  | 52              |
| Epilepsy           | Female | 28-364 days | 95+ years | Global     | 1         | 2     | Mean BMI                             | 429             |
| Epilepsy           | Female | 28-364 days | 95+ years | Global     | 1         | 2     | Cholesterol (total, mean per capita) | --              |
| Epilepsy           | Female | 28-364 days | 95+ years | Global     | -1        | 3     | Education (years per capita)         | 39              |
| Epilepsy           | Female | 28-364 days | 95+ years | Global     | -1        | 3     | Socio-demographic Index              | 45              |
| Epilepsy           | Female | 28-364 days | 95+ years | Global     | -1        | 3     | LDI (IS per capita)                  | --              |
| Epilepsy           | Female | 28-364 days | 95+ years | Global     | 1         | 3     | Cumulative Cigarettes (10 Years)     | --              |
| Epilepsy           | Female | 28-364 days | 95+ years | Global     | 1         | 3     | Cumulative Cigarettes (5 Years)      | --              |
| Epilepsy           | Male   | 28-364 days | 95+ years | Data Rich  | 1         | 1     | Log-transformed SEV scalar: Epilepsy | 120             |
| Epilepsy           | Male   | 28-364 days | 95+ years | Data Rich  | 1         | 1     | Pig Meat (kg per capita)             | 580             |
| Epilepsy           | Male   | 28-364 days | 95+ years | Data Rich  | 1         | 1     | Pigs (per capita)                    | 662             |
| Epilepsy           | Male   | 28-364 days | 95+ years | Data Rich  | 1         | 1     | Systolic Blood Pressure (mmHg)       | --              |
| Epilepsy           | Male   | 28-364 days | 95+ years | Data Rich  | -1        | 2     | Healthcare access and quality index  | 13              |
| Epilepsy           | Male   | 28-364 days | 95+ years | Data Rich  | 1         | 2     | Mean BMI                             | 522             |
| Epilepsy           | Male   | 28-364 days | 95+ years | Data Rich  | 1         | 2     | Cholesterol (total, mean per capita) | --              |
| Epilepsy           | Male   | 28-364 days | 95+ years | Data Rich  | -1        | 3     | Education (years per capita)         | 14              |
| Epilepsy           | Male   | 28-364 days | 95+ years | Data Rich  | -1        | 3     | Socio-demographic Index              | 14              |
| Epilepsy           | Male   | 28-364 days | 95+ years | Data Rich  | -1        | 3     | LDI (IS per capita)                  | --              |
| Epilepsy           | Male   | 28-364 days | 95+ years | Data Rich  | 1         | 3     | Cumulative Cigarettes (10 Years)     | 26              |
| Epilepsy           | Male   | 28-364 days | 95+ years | Data Rich  | 1         | 3     | Cumulative Cigarettes (5 Years)      | 33              |
| Epilepsy           | Male   | 28-364 days | 95+ years | Global     | 1         | 1     | Log-transformed SEV scalar: Epilepsy | 129             |
| Epilepsy           | Male   | 28-364 days | 95+ years | Global     | 1         | 1     | Pig Meat (kg per capita)             | 468             |
| Epilepsy           | Male   | 28-364 days | 95+ years | Global     | 1         | 1     | Pigs (per capita)                    | 712             |
| Epilepsy           | Male   | 28-364 days | 95+ years | Global     | 1         | 1     | Systolic Blood Pressure (mmHg)       | --              |
| Epilepsy           | Male   | 28-364 days | 95+ years | Global     | -1        | 2     | Healthcare access and quality index  | 54              |
| Epilepsy           | Male   | 28-364 days | 95+ years | Global     | 1         | 2     | Mean BMI                             | 394             |
| Epilepsy           | Male   | 28-364 days | 95+ years | Global     | 1         | 2     | Cholesterol (total, mean per capita) | --              |
| Epilepsy           | Male   | 28-364 days | 95+ years | Global     | -1        | 3     | Socio-demographic Index              | 43              |
| Epilepsy           | Male   | 28-364 days | 95+ years | Global     | -1        | 3     | Education (years per capita)         | 89              |
| Epilepsy           | Male   | 28-364 days | 95+ years | Global     | -1        | 3     | LDI (IS per capita)                  | --              |
| Epilepsy           | Male   | 28-364 days | 95+ years | Global     | 1         | 3     | Cumulative Cigarettes (5 Years)      | 33              |
| Epilepsy           | Male   | 28-364 days | 95+ years | Global     | 1         | 3     | Cumulative Cigarettes (10 Years)     | --              |
| Multiple sclerosis | Female | 20-24 years | 95+ years | Data Rich  | 1         | 1     | Absolute value of average latitude   | 1000            |
| Multiple sclerosis | Female | 20-24 years | 95+ years | Data Rich  | -1        | 2     | Healthcare access and quality index  | --              |
| Multiple sclerosis | Female | 20-24 years | 95+ years | Data Rich  | 1         | 2     | Cholesterol (total, mean per capita) | --              |
| Multiple sclerosis | Female | 20-24 years | 95+ years | Data Rich  | -1        | 3     | Education (years per capita)         | --              |
| Multiple sclerosis | Female | 20-24 years | 95+ years | Data Rich  | -1        | 3     | LDI (IS per capita)                  | --              |
| Multiple sclerosis | Female | 20-24 years | 95+ years | Data Rich  | 1         | 3     | Socio-demographic Index              | 618             |
| Multiple sclerosis | Female | 20-24 years | 95+ years | Data Rich  | 1         | 3     | Cumulative Cigarettes (10 Years)     | --              |
| Multiple sclerosis | Female | 20-24 years | 95+ years | Data Rich  | 1         | 3     | Cumulative Cigarettes (5 Years)      | --              |
| Multiple sclerosis | Female | 20-24 years | 95+ years | Data Rich  | 1         | 3     | Smoking Prevalence                   | --              |
| Multiple sclerosis | Female | 20-24 years | 95+ years | Global     | 1         | 1     | Absolute value of average latitude   | 1000            |
| Multiple sclerosis | Female | 20-24 years | 95+ years | Global     | -1        | 2     | Healthcare access and quality index  | --              |
| Multiple sclerosis | Female | 20-24 years | 95+ years | Global     | 1         | 2     | Cholesterol (total, mean per capita) | --              |
| Multiple sclerosis | Female | 20-24 years | 95+ years | Global     | -1        | 3     | Education (years per capita)         | --              |
| Multiple sclerosis | Female | 20-24 years | 95+ years | Global     | -1        | 3     | LDI (IS per capita)                  | --              |
| Multiple sclerosis | Female | 20-24 years | 95+ years | Global     | -1        | 3     | Socio-demographic Index              | 569             |
| Multiple sclerosis | Female | 20-24 years | 95+ years | Global     | 1         | 3     | Cumulative Cigarettes (10 Years)     | --              |
| Multiple sclerosis | Female | 20-24 years | 95+ years | Global     | 1         | 3     | Cumulative Cigarettes (5 Years)      | --              |
| Multiple sclerosis | Female | 20-24 years | 95+ years | Global     | 1         | 3     | Smoking Prevalence                   | --              |
| Multiple sclerosis | Male   | 20-24 years | 95+ years | Data Rich  | 1         | 1     | Absolute value of average latitude   | 1000            |
| Multiple sclerosis | Male   | 20-24 years | 95+ years | Data Rich  | -1        | 2     | Healthcare access and quality index  | --              |
| Multiple sclerosis | Male   | 20-24 years | 95+ years | Data Rich  | 1         | 2     | Cholesterol (total, mean per capita) | --              |
| Multiple sclerosis | Male   | 20-24 years | 95+ years | Data Rich  | -1        | 3     | Education (years per capita)         | --              |
| Multiple sclerosis | Male   | 20-24 years | 95+ years | Data Rich  | -1        | 3     | LDI (IS per capita)                  | --              |
| Multiple sclerosis | Male   | 20-24 years | 95+ years | Data Rich  | 1         | 3     | Socio-demographic Index              | 324             |
| Multiple sclerosis | Male   | 20-24 years | 95+ years | Data Rich  | 1         | 3     | Cumulative Cigarettes (10 Years)     | --              |
| Multiple sclerosis | Male   | 20-24 years | 95+ years | Data Rich  | 1         | 3     | Cumulative Cigarettes (5 Years)      | --              |
| Multiple sclerosis | Male   | 20-24 years | 95+ years | Data Rich  | 1         | 3     | Smoking Prevalence                   | --              |
| Multiple sclerosis | Male   | 20-24 years | 95+ years | Global     | 1         | 1     | Absolute value of average latitude   | 1000            |
| Multiple sclerosis | Male   | 20-24 years | 95+ years | Global     | -1        | 2     | Healthcare access and quality index  | --              |
| Multiple sclerosis | Male   | 20-24 years | 95+ years | Global     | 1         | 2     | Cholesterol (total, mean per capita) | --              |
| Multiple sclerosis | Male   | 20-24 years | 95+ years | Global     | -1        | 3     | Education (years per capita)         | --              |

**Appendix Table 9: CODEm covariates used, level of covariate, and expected direction of covariate by cause, sex, and age**

*Covariates that CODEm did not select during the covariate selection process have no draw counts listed.*

| Cause                        | Sex    | Age Start   | Age End   | Model Type | Direction | Level | Covariate Name                                         | Number of Draws |
|------------------------------|--------|-------------|-----------|------------|-----------|-------|--------------------------------------------------------|-----------------|
| Multiple sclerosis           | Male   | 20-24 years | 95+ years | Global     | -1        | 3     | LDI (IS per capita)                                    | --              |
| Multiple sclerosis           | Male   | 20-24 years | 95+ years | Global     | 1         | 3     | Socio-demographic Index                                | 569             |
| Multiple sclerosis           | Male   | 20-24 years | 95+ years | Global     | 1         | 3     | Cumulative Cigarettes (10 Years)                       | --              |
| Multiple sclerosis           | Male   | 20-24 years | 95+ years | Global     | 1         | 3     | Cumulative Cigarettes (5 Years)                        | --              |
| Multiple sclerosis           | Male   | 20-24 years | 95+ years | Global     | 1         | 3     | Smoking Prevalence                                     | --              |
| Motor neuron disease         | Female | 0-6 days    | 95+ years | Data Rich  | -1        | 1     | Mean BMI                                               | --              |
| Motor neuron disease         | Female | 0-6 days    | 95+ years | Data Rich  | 0         | 1     | fruits adjusted(g)                                     | 758             |
| Motor neuron disease         | Female | 0-6 days    | 95+ years | Data Rich  | 0         | 1     | Cholesterol (total, mean per capita)                   | 761             |
| Motor neuron disease         | Female | 0-6 days    | 95+ years | Data Rich  | 1         | 1     | Diabetes Fasting Plasma Glucose (mmol/L)               | 286             |
| Motor neuron disease         | Female | 0-6 days    | 95+ years | Data Rich  | 1         | 1     | Absolute value of average latitude                     | 312             |
| Motor neuron disease         | Female | 0-6 days    | 95+ years | Data Rich  | 1         | 1     | Socio-demographic Index                                | 659             |
| Motor neuron disease         | Female | 0-6 days    | 95+ years | Data Rich  | -1        | 2     | Healthcare access and quality index                    | --              |
| Motor neuron disease         | Female | 0-6 days    | 95+ years | Data Rich  | 0         | 2     | Population-weighted mean temperature                   | 270             |
| Motor neuron disease         | Female | 0-6 days    | 95+ years | Data Rich  | 0         | 2     | Improved Water Source (proportion with access)         | --              |
| Motor neuron disease         | Female | 0-6 days    | 95+ years | Data Rich  | 0         | 2     | Sanitation (proportion with access)                    | --              |
| Motor neuron disease         | Female | 0-6 days    | 95+ years | Data Rich  | 0         | 3     | Education (years per capita)                           | --              |
| Motor neuron disease         | Female | 0-6 days    | 95+ years | Data Rich  | 0         | 3     | LDI (IS per capita)                                    | --              |
| Motor neuron disease         | Female | 0-6 days    | 95+ years | Global     | 0         | 1     | fruits adjusted(g)                                     | 543             |
| Motor neuron disease         | Female | 0-6 days    | 95+ years | Global     | 0         | 1     | Cholesterol (total, mean per capita)                   | 750             |
| Motor neuron disease         | Female | 0-6 days    | 95+ years | Global     | 1         | 1     | Absolute value of average latitude                     | 240             |
| Motor neuron disease         | Female | 0-6 days    | 95+ years | Global     | 1         | 1     | Diabetes Fasting Plasma Glucose (mmol/L)               | 465             |
| Motor neuron disease         | Female | 0-6 days    | 95+ years | Global     | 1         | 1     | Socio-demographic Index                                | 811             |
| Motor neuron disease         | Female | 0-6 days    | 95+ years | Global     | -1        | 2     | Healthcare access and quality index                    | --              |
| Motor neuron disease         | Female | 0-6 days    | 95+ years | Global     | -1        | 2     | Mean BMI                                               | --              |
| Motor neuron disease         | Female | 0-6 days    | 95+ years | Global     | 0         | 2     | Improved Water Source (proportion with access)         | 40              |
| Motor neuron disease         | Female | 0-6 days    | 95+ years | Global     | 0         | 2     | Population-weighted mean temperature                   | 50              |
| Motor neuron disease         | Female | 0-6 days    | 95+ years | Global     | 0         | 2     | Sanitation (proportion with access)                    | 74              |
| Motor neuron disease         | Female | 0-6 days    | 95+ years | Global     | 0         | 3     | Education (years per capita)                           | 194             |
| Motor neuron disease         | Female | 0-6 days    | 95+ years | Global     | 0         | 3     | LDI (IS per capita)                                    | --              |
| Motor neuron disease         | Male   | 0-6 days    | 95+ years | Data Rich  | -1        | 1     | Mean BMI                                               | --              |
| Motor neuron disease         | Male   | 0-6 days    | 95+ years | Data Rich  | 0         | 1     | Cholesterol (total, mean per capita)                   | 134             |
| Motor neuron disease         | Male   | 0-6 days    | 95+ years | Data Rich  | 0         | 1     | fruits adjusted(g)                                     | 743             |
| Motor neuron disease         | Male   | 0-6 days    | 95+ years | Data Rich  | 1         | 1     | Diabetes Fasting Plasma Glucose (mmol/L)               | 165             |
| Motor neuron disease         | Male   | 0-6 days    | 95+ years | Data Rich  | 1         | 1     | Absolute value of average latitude                     | 473             |
| Motor neuron disease         | Male   | 0-6 days    | 95+ years | Data Rich  | 1         | 1     | Socio-demographic Index                                | 889             |
| Motor neuron disease         | Male   | 0-6 days    | 95+ years | Data Rich  | -1        | 2     | Healthcare access and quality index                    | --              |
| Motor neuron disease         | Male   | 0-6 days    | 95+ years | Data Rich  | 0         | 2     | Sanitation (proportion with access)                    | 4               |
| Motor neuron disease         | Male   | 0-6 days    | 95+ years | Data Rich  | 0         | 2     | Improved Water Source (proportion with access)         | 20              |
| Motor neuron disease         | Male   | 0-6 days    | 95+ years | Data Rich  | 0         | 2     | Population-weighted mean temperature                   | --              |
| Motor neuron disease         | Male   | 0-6 days    | 95+ years | Data Rich  | 0         | 3     | Education (years per capita)                           | 260             |
| Motor neuron disease         | Male   | 0-6 days    | 95+ years | Data Rich  | 0         | 3     | LDI (IS per capita)                                    | --              |
| Motor neuron disease         | Male   | 0-6 days    | 95+ years | Global     | -1        | 1     | Mean BMI                                               | --              |
| Motor neuron disease         | Male   | 0-6 days    | 95+ years | Global     | 0         | 1     | Cholesterol (total, mean per capita)                   | 420             |
| Motor neuron disease         | Male   | 0-6 days    | 95+ years | Global     | 0         | 1     | fruits adjusted(g)                                     | 762             |
| Motor neuron disease         | Male   | 0-6 days    | 95+ years | Global     | 1         | 1     | Diabetes Fasting Plasma Glucose (mmol/L)               | 37              |
| Motor neuron disease         | Male   | 0-6 days    | 95+ years | Global     | 1         | 1     | Absolute value of average latitude                     | 413             |
| Motor neuron disease         | Male   | 0-6 days    | 95+ years | Global     | 1         | 1     | Socio-demographic Index                                | 705             |
| Motor neuron disease         | Male   | 0-6 days    | 95+ years | Global     | -1        | 2     | Healthcare access and quality index                    | --              |
| Motor neuron disease         | Male   | 0-6 days    | 95+ years | Global     | 0         | 2     | Sanitation (proportion with access)                    | 164             |
| Motor neuron disease         | Male   | 0-6 days    | 95+ years | Global     | 0         | 2     | Improved Water Source (proportion with access)         | --              |
| Motor neuron disease         | Male   | 0-6 days    | 95+ years | Global     | 0         | 2     | Population-weighted mean temperature                   | --              |
| Motor neuron disease         | Male   | 0-6 days    | 95+ years | Global     | 0         | 3     | Education (years per capita)                           | --              |
| Motor neuron disease         | Male   | 0-6 days    | 95+ years | Global     | 0         | 3     | LDI (IS per capita)                                    | --              |
| Other neurological disorders | Female | 28-364 days | 95+ years | Data Rich  | 1         | 1     | Pig Meat (kg per capita)                               | 154             |
| Other neurological disorders | Female | 28-364 days | 95+ years | Data Rich  | 1         | 1     | Cholesterol (total, mean per capita)                   | 395             |
| Other neurological disorders | Female | 28-364 days | 95+ years | Data Rich  | 1         | 1     | red meats adjusted(g)                                  | 398             |
| Other neurological disorders | Female | 28-364 days | 95+ years | Data Rich  | 1         | 1     | Mean BMI                                               | 960             |
| Other neurological disorders | Female | 28-364 days | 95+ years | Data Rich  | 1         | 1     | Systolic Blood Pressure (mmHg)                         | --              |
| Other neurological disorders | Female | 28-364 days | 95+ years | Data Rich  | 1         | 1     | Underweight (proportion <2SD weight for age, <5 years) | --              |
| Other neurological disorders | Female | 28-364 days | 95+ years | Data Rich  | -1        | 2     | fruits adjusted(g)                                     | 119             |
| Other neurological disorders | Female | 28-364 days | 95+ years | Data Rich  | -1        | 2     | Healthcare access and quality index                    | --              |
| Other neurological disorders | Female | 28-364 days | 95+ years | Data Rich  | 1         | 2     | Alcohol (liters per capita)                            | --              |
| Other neurological disorders | Female | 28-364 days | 95+ years | Data Rich  | 1         | 2     | Population Density (over 1000 ppl/sqkm, proportion)    | --              |
| Other neurological disorders | Female | 28-364 days | 95+ years | Data Rich  | -1        | 3     | Education (years per capita)                           | --              |
| Other neurological disorders | Female | 28-364 days | 95+ years | Data Rich  | -1        | 3     | LDI (IS per capita)                                    | --              |
| Other neurological disorders | Female | 28-364 days | 95+ years | Data Rich  | 0         | 3     | Socio-demographic Index                                | 179             |
| Other neurological disorders | Female | 28-364 days | 95+ years | Data Rich  | 1         | 3     | Smoking Prevalence                                     | 207             |
| Other neurological disorders | Female | 28-364 days | 95+ years | Data Rich  | 1         | 3     | Cumulative Cigarettes (10 Years)                       | --              |
| Other neurological disorders | Female | 28-364 days | 95+ years | Data Rich  | 1         | 3     | Cumulative Cigarettes (5 Years)                        | --              |
| Other neurological disorders | Female | 28-364 days | 95+ years | Global     | 1         | 1     | red meats adjusted(g)                                  | 176             |
| Other neurological disorders | Female | 28-364 days | 95+ years | Global     | 1         | 1     | Pig Meat (kg per capita)                               | 222             |
| Other neurological disorders | Female | 28-364 days | 95+ years | Global     | 1         | 1     | Cholesterol (total, mean per capita)                   | 544             |
| Other neurological disorders | Female | 28-364 days | 95+ years | Global     | 1         | 1     | Mean BMI                                               | 963             |
| Other neurological disorders | Female | 28-364 days | 95+ years | Global     | 1         | 1     | Systolic Blood Pressure (mmHg)                         | --              |
| Other neurological disorders | Female | 28-364 days | 95+ years | Global     | 1         | 1     | Underweight (proportion <2SD weight for age, <5 years) | --              |
| Other neurological disorders | Female | 28-364 days | 95+ years | Global     | -1        | 2     | fruits adjusted(g)                                     | 62              |
| Other neurological disorders | Female | 28-364 days | 95+ years | Global     | -1        | 2     | Healthcare access and quality index                    | --              |
| Other neurological disorders | Female | 28-364 days | 95+ years | Global     | 1         | 2     | Population Density (over 1000 ppl/sqkm, proportion)    | 10              |

**Appendix Table 9: CODEm covariates used, level of covariate, and expected direction of covariate by cause, sex, and age**

*Covariates that CODEm did not select during the covariate selection process have no draw counts listed.*

| Cause                        | Sex    | Age Start   | Age End     | Model Type | Direction | Level | Covariate Name                                         | Number of Draws |
|------------------------------|--------|-------------|-------------|------------|-----------|-------|--------------------------------------------------------|-----------------|
| Other neurological disorders | Female | 28-364 days | 95+ years   | Global     | 1         | 2     | Alcohol (liters per capita)                            | --              |
| Other neurological disorders | Female | 28-364 days | 95+ years   | Global     | -1        | 3     | Education (years per capita)                           | --              |
| Other neurological disorders | Female | 28-364 days | 95+ years   | Global     | -1        | 3     | LDI (IS per capita)                                    | --              |
| Other neurological disorders | Female | 28-364 days | 95+ years   | Global     | 0         | 3     | Socio-demographic Index                                | 436             |
| Other neurological disorders | Female | 28-364 days | 95+ years   | Global     | 1         | 3     | Smoking Prevalence                                     | 101             |
| Other neurological disorders | Female | 28-364 days | 95+ years   | Global     | 1         | 3     | Cumulative Cigarettes (10 Years)                       | --              |
| Other neurological disorders | Female | 28-364 days | 95+ years   | Global     | 1         | 3     | Cumulative Cigarettes (5 Years)                        | --              |
| Other neurological disorders | Male   | 28-364 days | 95+ years   | Data Rich  | 1         | 1     | Pig Meat (kg per capita)                               | 7               |
| Other neurological disorders | Male   | 28-364 days | 95+ years   | Data Rich  | 1         | 1     | Cholesterol (total, mean per capita)                   | 87              |
| Other neurological disorders | Male   | 28-364 days | 95+ years   | Data Rich  | 1         | 1     | Systolic Blood Pressure (mmHg)                         | 468             |
| Other neurological disorders | Male   | 28-364 days | 95+ years   | Data Rich  | 1         | 1     | Mean BMI                                               | 715             |
| Other neurological disorders | Male   | 28-364 days | 95+ years   | Data Rich  | 1         | 1     | Underweight (proportion <2SD weight for age, <5 years) | --              |
| Other neurological disorders | Male   | 28-364 days | 95+ years   | Data Rich  | 1         | 1     | red meats adjusted(g)                                  | --              |
| Other neurological disorders | Male   | 28-364 days | 95+ years   | Data Rich  | -1        | 2     | Healthcare access and quality index                    | 21              |
| Other neurological disorders | Male   | 28-364 days | 95+ years   | Data Rich  | -1        | 2     | fruits adjusted(g)                                     | 21              |
| Other neurological disorders | Male   | 28-364 days | 95+ years   | Data Rich  | 1         | 2     | Alcohol (liters per capita)                            | 293             |
| Other neurological disorders | Male   | 28-364 days | 95+ years   | Data Rich  | 1         | 2     | Population Density (over 1000 ppl/sqkm, proportion)    | --              |
| Other neurological disorders | Male   | 28-364 days | 95+ years   | Data Rich  | -1        | 3     | Education (years per capita)                           | --              |
| Other neurological disorders | Male   | 28-364 days | 95+ years   | Data Rich  | -1        | 3     | LDI (IS per capita)                                    | --              |
| Other neurological disorders | Male   | 28-364 days | 95+ years   | Data Rich  | 0         | 3     | Socio-demographic Index                                | 534             |
| Other neurological disorders | Male   | 28-364 days | 95+ years   | Data Rich  | 1         | 3     | Cumulative Cigarettes (10 Years)                       | --              |
| Other neurological disorders | Male   | 28-364 days | 95+ years   | Data Rich  | 1         | 3     | Cumulative Cigarettes (5 Years)                        | --              |
| Other neurological disorders | Male   | 28-364 days | 95+ years   | Data Rich  | 1         | 3     | Smoking Prevalence                                     | --              |
| Other neurological disorders | Male   | 28-364 days | 95+ years   | Global     | 1         | 1     | Pig Meat (kg per capita)                               | 102             |
| Other neurological disorders | Male   | 28-364 days | 95+ years   | Global     | 1         | 1     | Cholesterol (total, mean per capita)                   | 245             |
| Other neurological disorders | Male   | 28-364 days | 95+ years   | Global     | 1         | 1     | Systolic Blood Pressure (mmHg)                         | 260             |
| Other neurological disorders | Male   | 28-364 days | 95+ years   | Global     | 1         | 1     | Mean BMI                                               | 935             |
| Other neurological disorders | Male   | 28-364 days | 95+ years   | Global     | 1         | 1     | Underweight (proportion <2SD weight for age, <5 years) | --              |
| Other neurological disorders | Male   | 28-364 days | 95+ years   | Global     | 1         | 1     | red meats adjusted(g)                                  | --              |
| Other neurological disorders | Male   | 28-364 days | 95+ years   | Global     | -1        | 2     | Healthcare access and quality index                    | 140             |
| Other neurological disorders | Male   | 28-364 days | 95+ years   | Global     | -1        | 2     | fruits adjusted(g)                                     | 140             |
| Other neurological disorders | Male   | 28-364 days | 95+ years   | Global     | 1         | 2     | Population Density (over 1000 ppl/sqkm, proportion)    | 9               |
| Other neurological disorders | Male   | 28-364 days | 95+ years   | Global     | 1         | 2     | Alcohol (liters per capita)                            | 140             |
| Other neurological disorders | Male   | 28-364 days | 95+ years   | Global     | -1        | 3     | Education (years per capita)                           | --              |
| Other neurological disorders | Male   | 28-364 days | 95+ years   | Global     | -1        | 3     | LDI (IS per capita)                                    | --              |
| Other neurological disorders | Male   | 28-364 days | 95+ years   | Global     | 0         | 3     | Socio-demographic Index                                | 296             |
| Other neurological disorders | Male   | 28-364 days | 95+ years   | Global     | 1         | 3     | Cumulative Cigarettes (10 Years)                       | --              |
| Other neurological disorders | Male   | 28-364 days | 95+ years   | Global     | 1         | 3     | Cumulative Cigarettes (5 Years)                        | --              |
| Other neurological disorders | Male   | 28-364 days | 95+ years   | Global     | 1         | 3     | Smoking Prevalence                                     | --              |
| Eating disorders             | Female | 5-9 years   | 45-49 years | Data Rich  | -1        | 1     | Underweight (proportion <2SD weight for age, <5 years) | 37              |
| Eating disorders             | Female | 5-9 years   | 45-49 years | Data Rich  | 1         | 1     | Maternal Education (years per capita)                  | 568             |
| Eating disorders             | Female | 5-9 years   | 45-49 years | Data Rich  | 1         | 1     | Education (years per capita)                           | --              |
| Eating disorders             | Female | 5-9 years   | 45-49 years | Data Rich  | 1         | 1     | LDI (IS per capita)                                    | --              |
| Eating disorders             | Female | 5-9 years   | 45-49 years | Data Rich  | 1         | 1     | Sanitation (proportion with access)                    | --              |
| Eating disorders             | Female | 5-9 years   | 45-49 years | Data Rich  | -1        | 2     | Healthcare access and quality index                    | 138             |
| Eating disorders             | Female | 5-9 years   | 45-49 years | Data Rich  | 1         | 3     | Socio-demographic Index                                | 161             |
| Eating disorders             | Female | 5-9 years   | 45-49 years | Global     | -1        | 1     | Underweight (proportion <2SD weight for age, <5 years) | 105             |
| Eating disorders             | Female | 5-9 years   | 45-49 years | Global     | 1         | 1     | Maternal Education (years per capita)                  | 477             |
| Eating disorders             | Female | 5-9 years   | 45-49 years | Global     | 1         | 1     | Education (years per capita)                           | --              |
| Eating disorders             | Female | 5-9 years   | 45-49 years | Global     | 1         | 1     | LDI (IS per capita)                                    | --              |
| Eating disorders             | Female | 5-9 years   | 45-49 years | Global     | 1         | 1     | Sanitation (proportion with access)                    | --              |
| Eating disorders             | Female | 5-9 years   | 45-49 years | Global     | -1        | 2     | Healthcare access and quality index                    | 119             |
| Eating disorders             | Female | 5-9 years   | 45-49 years | Global     | 1         | 3     | Socio-demographic Index                                | 211             |
| Eating disorders             | Male   | 5-9 years   | 45-49 years | Data Rich  | -1        | 1     | Underweight (proportion <2SD weight for age, <5 years) | --              |
| Eating disorders             | Male   | 5-9 years   | 45-49 years | Data Rich  | 1         | 1     | Maternal Education (years per capita)                  | 510             |
| Eating disorders             | Male   | 5-9 years   | 45-49 years | Data Rich  | 1         | 1     | Education (years per capita)                           | --              |
| Eating disorders             | Male   | 5-9 years   | 45-49 years | Data Rich  | 1         | 1     | LDI (IS per capita)                                    | --              |
| Eating disorders             | Male   | 5-9 years   | 45-49 years | Data Rich  | 1         | 1     | Sanitation (proportion with access)                    | --              |
| Eating disorders             | Male   | 5-9 years   | 45-49 years | Data Rich  | -1        | 2     | Healthcare access and quality index                    | 718             |
| Eating disorders             | Male   | 5-9 years   | 45-49 years | Data Rich  | 1         | 3     | Socio-demographic Index                                | 351             |
| Eating disorders             | Male   | 5-9 years   | 45-49 years | Global     | -1        | 1     | Underweight (proportion <2SD weight for age, <5 years) | 15              |
| Eating disorders             | Male   | 5-9 years   | 45-49 years | Global     | 1         | 1     | Maternal Education (years per capita)                  | 542             |
| Eating disorders             | Male   | 5-9 years   | 45-49 years | Global     | 1         | 1     | Education (years per capita)                           | --              |
| Eating disorders             | Male   | 5-9 years   | 45-49 years | Global     | 1         | 1     | LDI (IS per capita)                                    | --              |
| Eating disorders             | Male   | 5-9 years   | 45-49 years | Global     | 1         | 1     | Sanitation (proportion with access)                    | --              |
| Eating disorders             | Male   | 5-9 years   | 45-49 years | Global     | -1        | 2     | Healthcare access and quality index                    | 162             |
| Eating disorders             | Male   | 5-9 years   | 45-49 years | Global     | 1         | 3     | Socio-demographic Index                                | 451             |
| Anorexia nervosa             | Female | 5-9 years   | 45-49 years | Data Rich  | -1        | 1     | Underweight (proportion <2SD weight for age, <5 years) | 27              |
| Anorexia nervosa             | Female | 5-9 years   | 45-49 years | Data Rich  | 1         | 1     | Maternal Education (years per capita)                  | 751             |
| Anorexia nervosa             | Female | 5-9 years   | 45-49 years | Data Rich  | 1         | 1     | Education (years per capita)                           | --              |
| Anorexia nervosa             | Female | 5-9 years   | 45-49 years | Data Rich  | 1         | 1     | LDI (IS per capita)                                    | --              |
| Anorexia nervosa             | Female | 5-9 years   | 45-49 years | Data Rich  | 1         | 1     | Sanitation (proportion with access)                    | --              |
| Anorexia nervosa             | Female | 5-9 years   | 45-49 years | Data Rich  | -1        | 2     | Healthcare access and quality index                    | 386             |
| Anorexia nervosa             | Female | 5-9 years   | 45-49 years | Data Rich  | 1         | 3     | Socio-demographic Index                                | 47              |
| Anorexia nervosa             | Female | 5-9 years   | 45-49 years | Global     | -1        | 1     | Underweight (proportion <2SD weight for age, <5 years) | 92              |
| Anorexia nervosa             | Female | 5-9 years   | 45-49 years | Global     | 1         | 1     | Maternal Education (years per capita)                  | 565             |
| Anorexia nervosa             | Female | 5-9 years   | 45-49 years | Global     | 1         | 1     | Education (years per capita)                           | --              |
| Anorexia nervosa             | Female | 5-9 years   | 45-49 years | Global     | 1         | 1     | LDI (IS per capita)                                    | --              |

**Appendix Table 9: CODEm covariates used, level of covariate, and expected direction of covariate by cause, sex, and age**

*Covariates that CODEm did not select during the covariate selection process have no draw counts listed.*

| Cause                 | Sex    | Age Start   | Age End     | Model Type | Direction | Level | Covariate Name                                         | Number of Draws |
|-----------------------|--------|-------------|-------------|------------|-----------|-------|--------------------------------------------------------|-----------------|
| Anorexia nervosa      | Female | 5-9 years   | 45-49 years | Global     | 1         | 1     | Sanitation (proportion with access)                    | --              |
| Anorexia nervosa      | Female | 5-9 years   | 45-49 years | Global     | -1        | 2     | Healthcare access and quality index                    | 185             |
| Anorexia nervosa      | Female | 5-9 years   | 45-49 years | Global     | 1         | 3     | Socio-demographic Index                                | 174             |
| Anorexia nervosa      | Male   | 5-9 years   | 45-49 years | Data Rich  | -1        | 1     | Underweight (proportion <2SD weight for age, <5 years) | --              |
| Anorexia nervosa      | Male   | 5-9 years   | 45-49 years | Data Rich  | 1         | 1     | Maternal Education (years per capita)                  | 45              |
| Anorexia nervosa      | Male   | 5-9 years   | 45-49 years | Data Rich  | 1         | 1     | Education (years per capita)                           | --              |
| Anorexia nervosa      | Male   | 5-9 years   | 45-49 years | Data Rich  | 1         | 1     | LDI (I\$ per capita)                                   | --              |
| Anorexia nervosa      | Male   | 5-9 years   | 45-49 years | Data Rich  | 1         | 1     | Sanitation (proportion with access)                    | --              |
| Anorexia nervosa      | Male   | 5-9 years   | 45-49 years | Data Rich  | -1        | 2     | Healthcare access and quality index                    | 3               |
| Anorexia nervosa      | Male   | 5-9 years   | 45-49 years | Data Rich  | 1         | 3     | Socio-demographic Index                                | 71              |
| Anorexia nervosa      | Male   | 5-9 years   | 45-49 years | Global     | -1        | 1     | Underweight (proportion <2SD weight for age, <5 years) | 47              |
| Anorexia nervosa      | Male   | 5-9 years   | 45-49 years | Global     | 1         | 1     | Maternal Education (years per capita)                  | 133             |
| Anorexia nervosa      | Male   | 5-9 years   | 45-49 years | Global     | 1         | 1     | Education (years per capita)                           | --              |
| Anorexia nervosa      | Male   | 5-9 years   | 45-49 years | Global     | 1         | 1     | LDI (I\$ per capita)                                   | --              |
| Anorexia nervosa      | Male   | 5-9 years   | 45-49 years | Global     | 1         | 1     | Sanitation (proportion with access)                    | --              |
| Anorexia nervosa      | Male   | 5-9 years   | 45-49 years | Global     | -1        | 2     | Healthcare access and quality index                    | 7               |
| Anorexia nervosa      | Male   | 5-9 years   | 45-49 years | Global     | 1         | 3     | Socio-demographic Index                                | 69              |
| Bulimia nervosa       | Female | 5-9 years   | 45-49 years | Data Rich  | -1        | 1     | Underweight (proportion <2SD weight for age, <5 years) | 432             |
| Bulimia nervosa       | Female | 5-9 years   | 45-49 years | Data Rich  | 1         | 1     | Maternal Education (years per capita)                  | 1000            |
| Bulimia nervosa       | Female | 5-9 years   | 45-49 years | Data Rich  | 1         | 1     | Education (years per capita)                           | --              |
| Bulimia nervosa       | Female | 5-9 years   | 45-49 years | Data Rich  | 1         | 1     | LDI (I\$ per capita)                                   | --              |
| Bulimia nervosa       | Female | 5-9 years   | 45-49 years | Data Rich  | 1         | 1     | Sanitation (proportion with access)                    | --              |
| Bulimia nervosa       | Female | 5-9 years   | 45-49 years | Data Rich  | -1        | 2     | Healthcare access and quality index                    | --              |
| Bulimia nervosa       | Female | 5-9 years   | 45-49 years | Data Rich  | 1         | 3     | Socio-demographic Index                                | --              |
| Bulimia nervosa       | Female | 5-9 years   | 45-49 years | Global     | -1        | 1     | Underweight (proportion <2SD weight for age, <5 years) | 231             |
| Bulimia nervosa       | Female | 5-9 years   | 45-49 years | Global     | 1         | 1     | Maternal Education (years per capita)                  | 331             |
| Bulimia nervosa       | Female | 5-9 years   | 45-49 years | Global     | 1         | 1     | Education (years per capita)                           | --              |
| Bulimia nervosa       | Female | 5-9 years   | 45-49 years | Global     | 1         | 1     | LDI (I\$ per capita)                                   | --              |
| Bulimia nervosa       | Female | 5-9 years   | 45-49 years | Global     | 1         | 1     | Sanitation (proportion with access)                    | --              |
| Bulimia nervosa       | Female | 5-9 years   | 45-49 years | Global     | -1        | 2     | Healthcare access and quality index                    | --              |
| Bulimia nervosa       | Female | 5-9 years   | 45-49 years | Global     | 1         | 3     | Socio-demographic Index                                | --              |
| Bulimia nervosa       | Male   | 5-9 years   | 45-49 years | Data Rich  | -1        | 1     | Underweight (proportion <2SD weight for age, <5 years) | 795             |
| Bulimia nervosa       | Male   | 5-9 years   | 45-49 years | Data Rich  | 1         | 1     | Maternal Education (years per capita)                  | 144             |
| Bulimia nervosa       | Male   | 5-9 years   | 45-49 years | Data Rich  | 1         | 1     | Education (years per capita)                           | --              |
| Bulimia nervosa       | Male   | 5-9 years   | 45-49 years | Data Rich  | 1         | 1     | LDI (I\$ per capita)                                   | --              |
| Bulimia nervosa       | Male   | 5-9 years   | 45-49 years | Data Rich  | 1         | 1     | Sanitation (proportion with access)                    | --              |
| Bulimia nervosa       | Male   | 5-9 years   | 45-49 years | Data Rich  | -1        | 2     | Healthcare access and quality index                    | --              |
| Bulimia nervosa       | Male   | 5-9 years   | 45-49 years | Data Rich  | 1         | 3     | Socio-demographic Index                                | 256             |
| Bulimia nervosa       | Male   | 5-9 years   | 45-49 years | Global     | -1        | 1     | Underweight (proportion <2SD weight for age, <5 years) | 155             |
| Bulimia nervosa       | Male   | 5-9 years   | 45-49 years | Global     | 1         | 1     | Maternal Education (years per capita)                  | 311             |
| Bulimia nervosa       | Male   | 5-9 years   | 45-49 years | Global     | 1         | 1     | Education (years per capita)                           | --              |
| Bulimia nervosa       | Male   | 5-9 years   | 45-49 years | Global     | 1         | 1     | LDI (I\$ per capita)                                   | --              |
| Bulimia nervosa       | Male   | 5-9 years   | 45-49 years | Global     | 1         | 1     | Sanitation (proportion with access)                    | --              |
| Bulimia nervosa       | Male   | 5-9 years   | 45-49 years | Global     | -1        | 2     | Healthcare access and quality index                    | 73              |
| Bulimia nervosa       | Male   | 5-9 years   | 45-49 years | Global     | 1         | 3     | Socio-demographic Index                                | 266             |
| Alcohol use disorders | Female | 15-19 years | 95+ years   | Data Rich  | 1         | 1     | Alcohol (liters per capita)                            | 38              |
| Alcohol use disorders | Female | 15-19 years | 95+ years   | Data Rich  | 1         | 1     | Alcohol binge drinker proportion, age-standardized     | 962             |
| Alcohol use disorders | Female | 15-19 years | 95+ years   | Data Rich  | -1        | 2     | Health System Access 2 (unitless)                      | --              |
| Alcohol use disorders | Female | 15-19 years | 95+ years   | Data Rich  | -1        | 2     | Healthcare access and quality index                    | --              |
| Alcohol use disorders | Female | 15-19 years | 95+ years   | Data Rich  | -1        | 2     | Religion (binary, >50% Muslim)                         | --              |
| Alcohol use disorders | Female | 15-19 years | 95+ years   | Data Rich  | 0         | 2     | Smoking Prevalence                                     | 157             |
| Alcohol use disorders | Female | 15-19 years | 95+ years   | Data Rich  | 0         | 2     | Cumulative Cigarettes (10 Years)                       | 481             |
| Alcohol use disorders | Female | 15-19 years | 95+ years   | Data Rich  | -1        | 3     | Education (years per capita)                           | --              |
| Alcohol use disorders | Female | 15-19 years | 95+ years   | Data Rich  | -1        | 3     | LDI (I\$ per capita)                                   | --              |
| Alcohol use disorders | Female | 15-19 years | 95+ years   | Data Rich  | 0         | 3     | Socio-demographic Index                                | 691             |
| Alcohol use disorders | Female | 15-19 years | 95+ years   | Global     | 1         | 1     | Alcohol (liters per capita)                            | 290             |
| Alcohol use disorders | Female | 15-19 years | 95+ years   | Global     | 1         | 1     | Alcohol binge drinker proportion, age-standardized     | 710             |
| Alcohol use disorders | Female | 15-19 years | 95+ years   | Global     | -1        | 2     | Healthcare access and quality index                    | --              |
| Alcohol use disorders | Female | 15-19 years | 95+ years   | Global     | -1        | 2     | Religion (binary, >50% Muslim)                         | --              |
| Alcohol use disorders | Female | 15-19 years | 95+ years   | Global     | 0         | 2     | Smoking Prevalence                                     | 378             |
| Alcohol use disorders | Female | 15-19 years | 95+ years   | Global     | 0         | 2     | Cumulative Cigarettes (10 Years)                       | 670             |
| Alcohol use disorders | Female | 15-19 years | 95+ years   | Global     | -1        | 3     | Education (years per capita)                           | --              |
| Alcohol use disorders | Female | 15-19 years | 95+ years   | Global     | -1        | 3     | LDI (I\$ per capita)                                   | --              |
| Alcohol use disorders | Female | 15-19 years | 95+ years   | Global     | 0         | 3     | Socio-demographic Index                                | 521             |
| Alcohol use disorders | Male   | 15-19 years | 95+ years   | Data Rich  | 1         | 1     | Alcohol (liters per capita)                            | 647             |
| Alcohol use disorders | Male   | 15-19 years | 95+ years   | Data Rich  | 1         | 1     | Alcohol binge drinker proportion, age-standardized     | 754             |
| Alcohol use disorders | Male   | 15-19 years | 95+ years   | Data Rich  | -1        | 2     | Health System Access 2 (unitless)                      | --              |
| Alcohol use disorders | Male   | 15-19 years | 95+ years   | Data Rich  | -1        | 2     | Healthcare access and quality index                    | --              |
| Alcohol use disorders | Male   | 15-19 years | 95+ years   | Data Rich  | -1        | 2     | Religion (binary, >50% Muslim)                         | --              |
| Alcohol use disorders | Male   | 15-19 years | 95+ years   | Data Rich  | 0         | 2     | Cumulative Cigarettes (10 Years)                       | 309             |
| Alcohol use disorders | Male   | 15-19 years | 95+ years   | Data Rich  | 0         | 2     | Smoking Prevalence                                     | 374             |
| Alcohol use disorders | Male   | 15-19 years | 95+ years   | Data Rich  | -1        | 3     | Education (years per capita)                           | --              |
| Alcohol use disorders | Male   | 15-19 years | 95+ years   | Data Rich  | -1        | 3     | LDI (I\$ per capita)                                   | --              |
| Alcohol use disorders | Male   | 15-19 years | 95+ years   | Data Rich  | 0         | 3     | Socio-demographic Index                                | 780             |
| Alcohol use disorders | Male   | 15-19 years | 95+ years   | Global     | 1         | 1     | Alcohol binge drinker proportion, age-standardized     | 624             |
| Alcohol use disorders | Male   | 15-19 years | 95+ years   | Global     | 1         | 1     | Alcohol (liters per capita)                            | 662             |
| Alcohol use disorders | Male   | 15-19 years | 95+ years   | Global     | -1        | 2     | Religion (binary, >50% Muslim)                         | 409             |
| Alcohol use disorders | Male   | 15-19 years | 95+ years   | Global     | -1        | 2     | Healthcare access and quality index                    | --              |

**Appendix Table 9: CODEm covariates used, level of covariate, and expected direction of covariate by cause, sex, and age**  
*Covariates that CODEm did not select during the covariate selection process have no draw counts listed.*

| Cause                 | Sex    | Age Start   | Age End   | Model Type | Direction | Level | Covariate Name                                       | Number of Draws |
|-----------------------|--------|-------------|-----------|------------|-----------|-------|------------------------------------------------------|-----------------|
| Alcohol use disorders | Male   | 15-19 years | 95+ years | Global     | 0         | 2     | Cumulative Cigarettes (10 Years)                     | 723             |
| Alcohol use disorders | Male   | 15-19 years | 95+ years | Global     | 0         | 2     | Smoking Prevalence                                   | 723             |
| Alcohol use disorders | Male   | 15-19 years | 95+ years | Global     | -1        | 3     | Education (years per capita)                         | --              |
| Alcohol use disorders | Male   | 15-19 years | 95+ years | Global     | -1        | 3     | LDI (IS per capita)                                  | --              |
| Alcohol use disorders | Male   | 15-19 years | 95+ years | Global     | 0         | 3     | Socio-demographic Index                              | 583             |
| Drug use disorders    | Female | 15-19 years | 95+ years | Data Rich  | 1         | 1     | Intravenous drug use (age-standardized proportion)   | 6               |
| Drug use disorders    | Female | 15-19 years | 95+ years | Data Rich  | 1         | 1     | Intravenous drug use (proportion by age)             | 160             |
| Drug use disorders    | Female | 15-19 years | 95+ years | Data Rich  | 1         | 1     | Opioids per million population per day (10 year lag) | 1000            |
| Drug use disorders    | Female | 15-19 years | 95+ years | Data Rich  | 0         | 2     | Healthcare access and quality index                  | 962             |
| Drug use disorders    | Female | 15-19 years | 95+ years | Data Rich  | 1         | 2     | Opium Cultivation (binary)                           | 0               |
| Drug use disorders    | Female | 15-19 years | 95+ years | Data Rich  | 1         | 2     | Cumulative Cigarettes (10 Years)                     | --              |
| Drug use disorders    | Female | 15-19 years | 95+ years | Data Rich  | 1         | 2     | Cumulative Cigarettes (5 Years)                      | --              |
| Drug use disorders    | Female | 15-19 years | 95+ years | Data Rich  | 1         | 2     | Smoking Prevalence                                   | --              |
| Drug use disorders    | Female | 15-19 years | 95+ years | Data Rich  | 0         | 3     | Education (years per capita)                         | 1000            |
| Drug use disorders    | Female | 15-19 years | 95+ years | Data Rich  | 0         | 3     | Socio-demographic Index                              | 1000            |
| Drug use disorders    | Female | 15-19 years | 95+ years | Data Rich  | 0         | 3     | LDI (IS per capita)                                  | --              |
| Drug use disorders    | Female | 15-19 years | 95+ years | Global     | 1         | 1     | Intravenous drug use (age-standardized proportion)   | 220             |
| Drug use disorders    | Female | 15-19 years | 95+ years | Global     | 1         | 1     | Intravenous drug use (proportion by age)             | 634             |
| Drug use disorders    | Female | 15-19 years | 95+ years | Global     | 1         | 1     | Opioids per million population per day (10 year lag) | 988             |
| Drug use disorders    | Female | 15-19 years | 95+ years | Global     | 0         | 2     | Healthcare access and quality index                  | 332             |
| Drug use disorders    | Female | 15-19 years | 95+ years | Global     | 1         | 2     | Opium Cultivation (binary)                           | 0               |
| Drug use disorders    | Female | 15-19 years | 95+ years | Global     | 1         | 2     | Cumulative Cigarettes (10 Years)                     | --              |
| Drug use disorders    | Female | 15-19 years | 95+ years | Global     | 1         | 2     | Cumulative Cigarettes (5 Years)                      | --              |
| Drug use disorders    | Female | 15-19 years | 95+ years | Global     | 1         | 2     | Smoking Prevalence                                   | --              |
| Drug use disorders    | Female | 15-19 years | 95+ years | Global     | 0         | 3     | Socio-demographic Index                              | 950             |
| Drug use disorders    | Female | 15-19 years | 95+ years | Global     | 0         | 3     | Education (years per capita)                         | 993             |
| Drug use disorders    | Female | 15-19 years | 95+ years | Global     | 0         | 3     | LDI (IS per capita)                                  | --              |
| Drug use disorders    | Male   | 15-19 years | 95+ years | Data Rich  | 1         | 1     | Intravenous drug use (proportion by age)             | 199             |
| Drug use disorders    | Male   | 15-19 years | 95+ years | Data Rich  | 1         | 1     | Intravenous drug use (age-standardized proportion)   | 839             |
| Drug use disorders    | Male   | 15-19 years | 95+ years | Data Rich  | 1         | 1     | Opioids per million population per day (10 year lag) | 999             |
| Drug use disorders    | Male   | 15-19 years | 95+ years | Data Rich  | 0         | 2     | Healthcare access and quality index                  | 994             |
| Drug use disorders    | Male   | 15-19 years | 95+ years | Data Rich  | 1         | 2     | Opium Cultivation (binary)                           | 0               |
| Drug use disorders    | Male   | 15-19 years | 95+ years | Data Rich  | 1         | 2     | Cumulative Cigarettes (10 Years)                     | --              |
| Drug use disorders    | Male   | 15-19 years | 95+ years | Data Rich  | 1         | 2     | Cumulative Cigarettes (5 Years)                      | --              |
| Drug use disorders    | Male   | 15-19 years | 95+ years | Data Rich  | 1         | 2     | Smoking Prevalence                                   | --              |
| Drug use disorders    | Male   | 15-19 years | 95+ years | Data Rich  | 0         | 3     | Socio-demographic Index                              | 968             |
| Drug use disorders    | Male   | 15-19 years | 95+ years | Data Rich  | 0         | 3     | Education (years per capita)                         | 1000            |
| Drug use disorders    | Male   | 15-19 years | 95+ years | Data Rich  | 0         | 3     | LDI (IS per capita)                                  | --              |
| Drug use disorders    | Male   | 15-19 years | 95+ years | Global     | 1         | 1     | Intravenous drug use (proportion by age)             | 613             |
| Drug use disorders    | Male   | 15-19 years | 95+ years | Global     | 1         | 1     | Intravenous drug use (age-standardized proportion)   | 872             |
| Drug use disorders    | Male   | 15-19 years | 95+ years | Global     | 1         | 1     | Opioids per million population per day (10 year lag) | 997             |
| Drug use disorders    | Male   | 15-19 years | 95+ years | Global     | 0         | 2     | Healthcare access and quality index                  | 346             |
| Drug use disorders    | Male   | 15-19 years | 95+ years | Global     | 1         | 2     | Cumulative Cigarettes (10 Years)                     | --              |
| Drug use disorders    | Male   | 15-19 years | 95+ years | Global     | 1         | 2     | Cumulative Cigarettes (5 Years)                      | --              |
| Drug use disorders    | Male   | 15-19 years | 95+ years | Global     | 1         | 2     | Opium Cultivation (binary)                           | --              |
| Drug use disorders    | Male   | 15-19 years | 95+ years | Global     | 1         | 2     | Smoking Prevalence                                   | --              |
| Drug use disorders    | Male   | 15-19 years | 95+ years | Global     | 0         | 3     | Socio-demographic Index                              | 928             |
| Drug use disorders    | Male   | 15-19 years | 95+ years | Global     | 0         | 3     | Education (years per capita)                         | 971             |
| Drug use disorders    | Male   | 15-19 years | 95+ years | Global     | 0         | 3     | LDI (IS per capita)                                  | --              |
| Opioid use disorders  | Female | 15-19 years | 95+ years | Data Rich  | 1         | 1     | Opioids per million population per day (10 year lag) | 190             |
| Opioid use disorders  | Female | 15-19 years | 95+ years | Data Rich  | 1         | 1     | Opioids per million population per day               | 281             |
| Opioid use disorders  | Female | 15-19 years | 95+ years | Data Rich  | 1         | 1     | Opioids per million population per day (5 year lag)  | 529             |
| Opioid use disorders  | Female | 15-19 years | 95+ years | Data Rich  | 0         | 2     | Healthcare access and quality index                  | 32              |
| Opioid use disorders  | Female | 15-19 years | 95+ years | Data Rich  | 1         | 2     | Opium Cultivation (binary)                           | 38              |
| Opioid use disorders  | Female | 15-19 years | 95+ years | Data Rich  | 1         | 2     | Cumulative Cigarettes (10 Years)                     | --              |
| Opioid use disorders  | Female | 15-19 years | 95+ years | Data Rich  | 1         | 2     | Cumulative Cigarettes (5 Years)                      | --              |
| Opioid use disorders  | Female | 15-19 years | 95+ years | Data Rich  | 1         | 2     | Smoking Prevalence                                   | --              |
| Opioid use disorders  | Female | 15-19 years | 95+ years | Data Rich  | 0         | 3     | Socio-demographic Index                              | 875             |
| Opioid use disorders  | Female | 15-19 years | 95+ years | Data Rich  | 0         | 3     | Education (years per capita)                         | 999             |
| Opioid use disorders  | Female | 15-19 years | 95+ years | Data Rich  | 0         | 3     | LDI (IS per capita)                                  | --              |
| Opioid use disorders  | Female | 15-19 years | 95+ years | Global     | 1         | 1     | Opioids per million population per day (10 year lag) | 153             |
| Opioid use disorders  | Female | 15-19 years | 95+ years | Global     | 1         | 1     | Opioids per million population per day (5 year lag)  | 332             |
| Opioid use disorders  | Female | 15-19 years | 95+ years | Global     | 1         | 1     | Opioids per million population per day               | 515             |
| Opioid use disorders  | Female | 15-19 years | 95+ years | Global     | 0         | 2     | Healthcare access and quality index                  | 471             |
| Opioid use disorders  | Female | 15-19 years | 95+ years | Global     | 1         | 2     | Opium Cultivation (binary)                           | 25              |
| Opioid use disorders  | Female | 15-19 years | 95+ years | Global     | 1         | 2     | Cumulative Cigarettes (10 Years)                     | --              |
| Opioid use disorders  | Female | 15-19 years | 95+ years | Global     | 1         | 2     | Cumulative Cigarettes (5 Years)                      | --              |
| Opioid use disorders  | Female | 15-19 years | 95+ years | Global     | 1         | 2     | Smoking Prevalence                                   | --              |
| Opioid use disorders  | Female | 15-19 years | 95+ years | Global     | 0         | 3     | Socio-demographic Index                              | 700             |
| Opioid use disorders  | Female | 15-19 years | 95+ years | Global     | 0         | 3     | Education (years per capita)                         | 857             |
| Opioid use disorders  | Female | 15-19 years | 95+ years | Global     | 0         | 3     | LDI (IS per capita)                                  | --              |
| Opioid use disorders  | Male   | 15-19 years | 95+ years | Data Rich  | 1         | 1     | Intravenous drug use (age-standardized proportion)   | 7               |
| Opioid use disorders  | Male   | 15-19 years | 95+ years | Data Rich  | 1         | 1     | Intravenous drug use (proportion by age)             | 833             |
| Opioid use disorders  | Male   | 15-19 years | 95+ years | Data Rich  | 1         | 1     | Opioids per million population per day (10 year lag) | 1000            |
| Opioid use disorders  | Male   | 15-19 years | 95+ years | Data Rich  | 0         | 2     | Healthcare access and quality index                  | 802             |
| Opioid use disorders  | Male   | 15-19 years | 95+ years | Data Rich  | 1         | 2     | Cumulative Cigarettes (10 Years)                     | --              |
| Opioid use disorders  | Male   | 15-19 years | 95+ years | Data Rich  | 1         | 2     | Cumulative Cigarettes (5 Years)                      | --              |
| Opioid use disorders  | Male   | 15-19 years | 95+ years | Data Rich  | 1         | 2     | Opium Cultivation (binary)                           | --              |

**Appendix Table 9: CODEm covariates used, level of covariate, and expected direction of covariate by cause, sex, and age**

*Covariates that CODEm did not select during the covariate selection process have no draw counts listed.*

| Cause                     | Sex    | Age Start   | Age End   | Model Type | Direction | Level | Covariate Name                                       | Number of Draws |
|---------------------------|--------|-------------|-----------|------------|-----------|-------|------------------------------------------------------|-----------------|
| Opioid use disorders      | Male   | 15-19 years | 95+ years | Data Rich  | 1         | 2     | Smoking Prevalence                                   | --              |
| Opioid use disorders      | Male   | 15-19 years | 95+ years | Data Rich  | 0         | 3     | Socio-demographic Index                              | 967             |
| Opioid use disorders      | Male   | 15-19 years | 95+ years | Data Rich  | 0         | 3     | Education (years per capita)                         | 994             |
| Opioid use disorders      | Male   | 15-19 years | 95+ years | Data Rich  | 0         | 3     | LDI (I\$ per capita)                                 | --              |
| Opioid use disorders      | Male   | 15-19 years | 95+ years | Global     | 1         | 1     | Intravenous drug use (age-standardized proportion)   | 466             |
| Opioid use disorders      | Male   | 15-19 years | 95+ years | Global     | 1         | 1     | Intravenous drug use (proportion by age)             | 543             |
| Opioid use disorders      | Male   | 15-19 years | 95+ years | Global     | 1         | 1     | Opioids per million population per day (10 year lag) | 997             |
| Opioid use disorders      | Male   | 15-19 years | 95+ years | Global     | 0         | 2     | Healthcare access and quality index                  | 88              |
| Opioid use disorders      | Male   | 15-19 years | 95+ years | Global     | 1         | 2     | Opium Cultivation (binary)                           | 0               |
| Opioid use disorders      | Male   | 15-19 years | 95+ years | Global     | 1         | 2     | Cumulative Cigarettes (10 Years)                     | --              |
| Opioid use disorders      | Male   | 15-19 years | 95+ years | Global     | 1         | 2     | Cumulative Cigarettes (5 Years)                      | --              |
| Opioid use disorders      | Male   | 15-19 years | 95+ years | Global     | 1         | 2     | Smoking Prevalence                                   | --              |
| Opioid use disorders      | Male   | 15-19 years | 95+ years | Global     | 0         | 3     | Socio-demographic Index                              | 571             |
| Opioid use disorders      | Male   | 15-19 years | 95+ years | Global     | 0         | 3     | Education (years per capita)                         | 839             |
| Opioid use disorders      | Male   | 15-19 years | 95+ years | Global     | 0         | 3     | LDI (I\$ per capita)                                 | --              |
| Cocaine use disorders     | Female | 15-19 years | 95+ years | Data Rich  | 1         | 1     | Alcohol (liters per capita)                          | 1000            |
| Cocaine use disorders     | Female | 15-19 years | 95+ years | Data Rich  | 1         | 1     | Cumulative Cigarettes (10 Years)                     | --              |
| Cocaine use disorders     | Female | 15-19 years | 95+ years | Data Rich  | 1         | 1     | Cumulative Cigarettes (5 Years)                      | --              |
| Cocaine use disorders     | Female | 15-19 years | 95+ years | Data Rich  | 1         | 1     | Smoking Prevalence                                   | --              |
| Cocaine use disorders     | Female | 15-19 years | 95+ years | Data Rich  | -1        | 2     | Healthcare access and quality index                  | --              |
| Cocaine use disorders     | Female | 15-19 years | 95+ years | Data Rich  | 0         | 3     | Education (years per capita)                         | 926             |
| Cocaine use disorders     | Female | 15-19 years | 95+ years | Data Rich  | 0         | 3     | LDI (I\$ per capita)                                 | --              |
| Cocaine use disorders     | Female | 15-19 years | 95+ years | Data Rich  | 1         | 3     | Socio-demographic Index                              | --              |
| Cocaine use disorders     | Female | 15-19 years | 95+ years | Global     | 1         | 1     | Alcohol (liters per capita)                          | 1000            |
| Cocaine use disorders     | Female | 15-19 years | 95+ years | Global     | 1         | 1     | Cumulative Cigarettes (10 Years)                     | --              |
| Cocaine use disorders     | Female | 15-19 years | 95+ years | Global     | 1         | 1     | Cumulative Cigarettes (5 Years)                      | --              |
| Cocaine use disorders     | Female | 15-19 years | 95+ years | Global     | 1         | 1     | Smoking Prevalence                                   | --              |
| Cocaine use disorders     | Female | 15-19 years | 95+ years | Global     | -1        | 2     | Healthcare access and quality index                  | --              |
| Cocaine use disorders     | Female | 15-19 years | 95+ years | Global     | 0         | 3     | Education (years per capita)                         | 724             |
| Cocaine use disorders     | Female | 15-19 years | 95+ years | Global     | 0         | 3     | LDI (I\$ per capita)                                 | --              |
| Cocaine use disorders     | Female | 15-19 years | 95+ years | Global     | 1         | 3     | Socio-demographic Index                              | --              |
| Cocaine use disorders     | Male   | 15-19 years | 95+ years | Data Rich  | 1         | 1     | Alcohol (liters per capita)                          | 193             |
| Cocaine use disorders     | Male   | 15-19 years | 95+ years | Data Rich  | 1         | 1     | Cumulative Cigarettes (10 Years)                     | --              |
| Cocaine use disorders     | Male   | 15-19 years | 95+ years | Data Rich  | 1         | 1     | Cumulative Cigarettes (5 Years)                      | --              |
| Cocaine use disorders     | Male   | 15-19 years | 95+ years | Data Rich  | 1         | 1     | Smoking Prevalence                                   | --              |
| Cocaine use disorders     | Male   | 15-19 years | 95+ years | Data Rich  | -1        | 2     | Healthcare access and quality index                  | --              |
| Cocaine use disorders     | Male   | 15-19 years | 95+ years | Data Rich  | 0         | 3     | Education (years per capita)                         | 968             |
| Cocaine use disorders     | Male   | 15-19 years | 95+ years | Data Rich  | 0         | 3     | LDI (I\$ per capita)                                 | --              |
| Cocaine use disorders     | Male   | 15-19 years | 95+ years | Data Rich  | 1         | 3     | Socio-demographic Index                              | 807             |
| Cocaine use disorders     | Male   | 15-19 years | 95+ years | Global     | 1         | 1     | Alcohol (liters per capita)                          | 1000            |
| Cocaine use disorders     | Male   | 15-19 years | 95+ years | Global     | 1         | 1     | Cumulative Cigarettes (10 Years)                     | --              |
| Cocaine use disorders     | Male   | 15-19 years | 95+ years | Global     | 1         | 1     | Cumulative Cigarettes (5 Years)                      | --              |
| Cocaine use disorders     | Male   | 15-19 years | 95+ years | Global     | 1         | 1     | Smoking Prevalence                                   | --              |
| Cocaine use disorders     | Male   | 15-19 years | 95+ years | Global     | -1        | 2     | Healthcare access and quality index                  | --              |
| Cocaine use disorders     | Male   | 15-19 years | 95+ years | Global     | 0         | 3     | Education (years per capita)                         | 724             |
| Cocaine use disorders     | Male   | 15-19 years | 95+ years | Global     | 0         | 3     | LDI (I\$ per capita)                                 | --              |
| Cocaine use disorders     | Male   | 15-19 years | 95+ years | Global     | 1         | 3     | Socio-demographic Index                              | 449             |
| Cocaine use disorders     | Male   | 15-19 years | 95+ years | Global     | 1         | 1     | Alcohol (liters per capita)                          | 166             |
| Amphetamine use disorders | Female | 15-19 years | 95+ years | Data Rich  | 1         | 1     | Cumulative Cigarettes (10 Years)                     | --              |
| Amphetamine use disorders | Female | 15-19 years | 95+ years | Data Rich  | 1         | 1     | Cumulative Cigarettes (5 Years)                      | --              |
| Amphetamine use disorders | Female | 15-19 years | 95+ years | Data Rich  | 1         | 1     | Smoking Prevalence                                   | --              |
| Amphetamine use disorders | Female | 15-19 years | 95+ years | Data Rich  | -1        | 2     | Healthcare access and quality index                  | --              |
| Amphetamine use disorders | Female | 15-19 years | 95+ years | Data Rich  | 0         | 3     | Education (years per capita)                         | 834             |
| Amphetamine use disorders | Female | 15-19 years | 95+ years | Data Rich  | 0         | 3     | LDI (I\$ per capita)                                 | --              |
| Amphetamine use disorders | Female | 15-19 years | 95+ years | Data Rich  | 1         | 3     | Socio-demographic Index                              | 834             |
| Amphetamine use disorders | Female | 15-19 years | 95+ years | Global     | 1         | 1     | Alcohol (liters per capita)                          | 382             |
| Amphetamine use disorders | Female | 15-19 years | 95+ years | Global     | 1         | 1     | Cumulative Cigarettes (10 Years)                     | --              |
| Amphetamine use disorders | Female | 15-19 years | 95+ years | Global     | 1         | 1     | Cumulative Cigarettes (5 Years)                      | --              |
| Amphetamine use disorders | Female | 15-19 years | 95+ years | Global     | 1         | 1     | Smoking Prevalence                                   | --              |
| Amphetamine use disorders | Female | 15-19 years | 95+ years | Global     | -1        | 2     | Healthcare access and quality index                  | --              |
| Amphetamine use disorders | Female | 15-19 years | 95+ years | Global     | 0         | 3     | Education (years per capita)                         | 618             |
| Amphetamine use disorders | Female | 15-19 years | 95+ years | Global     | 0         | 3     | LDI (I\$ per capita)                                 | --              |
| Amphetamine use disorders | Female | 15-19 years | 95+ years | Global     | 1         | 3     | Socio-demographic Index                              | 618             |
| Amphetamine use disorders | Male   | 15-19 years | 95+ years | Data Rich  | 1         | 1     | Alcohol (liters per capita)                          | 1000            |
| Amphetamine use disorders | Male   | 15-19 years | 95+ years | Data Rich  | 1         | 1     | Cumulative Cigarettes (10 Years)                     | --              |
| Amphetamine use disorders | Male   | 15-19 years | 95+ years | Data Rich  | 1         | 1     | Cumulative Cigarettes (5 Years)                      | --              |
| Amphetamine use disorders | Male   | 15-19 years | 95+ years | Data Rich  | 1         | 1     | Smoking Prevalence                                   | --              |
| Amphetamine use disorders | Male   | 15-19 years | 95+ years | Data Rich  | -1        | 2     | Healthcare access and quality index                  | --              |
| Amphetamine use disorders | Male   | 15-19 years | 95+ years | Data Rich  | 0         | 3     | Education (years per capita)                         | --              |
| Amphetamine use disorders | Male   | 15-19 years | 95+ years | Data Rich  | 0         | 3     | LDI (I\$ per capita)                                 | --              |
| Amphetamine use disorders | Male   | 15-19 years | 95+ years | Data Rich  | 1         | 3     | Socio-demographic Index                              | --              |
| Amphetamine use disorders | Male   | 15-19 years | 95+ years | Global     | 1         | 1     | Alcohol (liters per capita)                          | 1000            |
| Amphetamine use disorders | Male   | 15-19 years | 95+ years | Global     | 1         | 1     | Cumulative Cigarettes (10 Years)                     | --              |
| Amphetamine use disorders | Male   | 15-19 years | 95+ years | Global     | 1         | 1     | Cumulative Cigarettes (5 Years)                      | --              |
| Amphetamine use disorders | Male   | 15-19 years | 95+ years | Global     | 1         | 1     | Smoking Prevalence                                   | --              |
| Amphetamine use disorders | Male   | 15-19 years | 95+ years | Global     | -1        | 2     | Healthcare access and quality index                  | --              |
| Amphetamine use disorders | Male   | 15-19 years | 95+ years | Global     | 0         | 3     | Education (years per capita)                         | 500             |
| Amphetamine use disorders | Male   | 15-19 years | 95+ years | Global     | 0         | 3     | LDI (I\$ per capita)                                 | --              |

**Appendix Table 9: CODEm covariates used, level of covariate, and expected direction of covariate by cause, sex, and age**

*Covariates that CODEm did not select during the covariate selection process have no draw counts listed.*

| Cause                     | Sex    | Age Start   | Age End     | Model Type | Direction | Level | Covariate Name                                    | Number of Draws |
|---------------------------|--------|-------------|-------------|------------|-----------|-------|---------------------------------------------------|-----------------|
| Amphetamine use disorders | Male   | 15-19 years | 95+ years   | Global     | 1         | 3     | Socio-demographic Index                           | --              |
| Other drug use disorders  | Female | 15-19 years | 95+ years   | Data Rich  | 1         | 1     | Alcohol (liters per capita)                       | 1000            |
| Other drug use disorders  | Female | 15-19 years | 95+ years   | Data Rich  | 1         | 1     | Cumulative Cigarettes (10 Years)                  | --              |
| Other drug use disorders  | Female | 15-19 years | 95+ years   | Data Rich  | 1         | 1     | Cumulative Cigarettes (5 Years)                   | --              |
| Other drug use disorders  | Female | 15-19 years | 95+ years   | Data Rich  | 1         | 1     | Smoking Prevalence                                | --              |
| Other drug use disorders  | Female | 15-19 years | 95+ years   | Data Rich  | -1        | 2     | Healthcare access and quality index               | --              |
| Other drug use disorders  | Female | 15-19 years | 95+ years   | Data Rich  | 0         | 3     | Education (years per capita)                      | 807             |
| Other drug use disorders  | Female | 15-19 years | 95+ years   | Data Rich  | 0         | 3     | LDI (I\$ per capita)                              | --              |
| Other drug use disorders  | Female | 15-19 years | 95+ years   | Data Rich  | 0         | 3     | Socio-demographic Index                           | --              |
| Other drug use disorders  | Female | 15-19 years | 95+ years   | Global     | 1         | 1     | Alcohol (liters per capita)                       | 1000            |
| Other drug use disorders  | Female | 15-19 years | 95+ years   | Global     | 1         | 1     | Cumulative Cigarettes (10 Years)                  | --              |
| Other drug use disorders  | Female | 15-19 years | 95+ years   | Global     | 1         | 1     | Cumulative Cigarettes (5 Years)                   | --              |
| Other drug use disorders  | Female | 15-19 years | 95+ years   | Global     | 1         | 1     | Smoking Prevalence                                | --              |
| Other drug use disorders  | Female | 15-19 years | 95+ years   | Global     | -1        | 2     | Healthcare access and quality index               | --              |
| Other drug use disorders  | Female | 15-19 years | 95+ years   | Global     | 0         | 3     | Education (years per capita)                      | 724             |
| Other drug use disorders  | Female | 15-19 years | 95+ years   | Global     | 0         | 3     | LDI (I\$ per capita)                              | --              |
| Other drug use disorders  | Female | 15-19 years | 95+ years   | Global     | 0         | 3     | Socio-demographic Index                           | --              |
| Other drug use disorders  | Male   | 15-19 years | 95+ years   | Data Rich  | 1         | 1     | Alcohol (liters per capita)                       | 1000            |
| Other drug use disorders  | Male   | 15-19 years | 95+ years   | Data Rich  | 1         | 1     | Cumulative Cigarettes (10 Years)                  | --              |
| Other drug use disorders  | Male   | 15-19 years | 95+ years   | Data Rich  | 1         | 1     | Cumulative Cigarettes (5 Years)                   | --              |
| Other drug use disorders  | Male   | 15-19 years | 95+ years   | Data Rich  | 1         | 1     | Smoking Prevalence                                | --              |
| Other drug use disorders  | Male   | 15-19 years | 95+ years   | Data Rich  | -1        | 2     | Healthcare access and quality index               | --              |
| Other drug use disorders  | Male   | 15-19 years | 95+ years   | Data Rich  | 0         | 3     | Socio-demographic Index                           | 802             |
| Other drug use disorders  | Male   | 15-19 years | 95+ years   | Data Rich  | 0         | 3     | Education (years per capita)                      | 962             |
| Other drug use disorders  | Male   | 15-19 years | 95+ years   | Data Rich  | 0         | 3     | LDI (I\$ per capita)                              | --              |
| Other drug use disorders  | Male   | 15-19 years | 95+ years   | Global     | 1         | 1     | Alcohol (liters per capita)                       | 1000            |
| Other drug use disorders  | Male   | 15-19 years | 95+ years   | Global     | 1         | 1     | Cumulative Cigarettes (10 Years)                  | --              |
| Other drug use disorders  | Male   | 15-19 years | 95+ years   | Global     | 1         | 1     | Cumulative Cigarettes (5 Years)                   | --              |
| Other drug use disorders  | Male   | 15-19 years | 95+ years   | Global     | 1         | 1     | Smoking Prevalence                                | --              |
| Other drug use disorders  | Male   | 15-19 years | 95+ years   | Global     | -1        | 2     | Healthcare access and quality index               | --              |
| Other drug use disorders  | Male   | 15-19 years | 95+ years   | Global     | 0         | 3     | Education (years per capita)                      | 724             |
| Other drug use disorders  | Male   | 15-19 years | 95+ years   | Global     | 0         | 3     | LDI (I\$ per capita)                              | --              |
| Other drug use disorders  | Male   | 15-19 years | 95+ years   | Global     | 0         | 3     | Socio-demographic Index                           | --              |
| Diabetes mellitus         | Female | 0-6 days    | 10-14 years | Data Rich  | -1        | 1     | Healthcare access and quality index               | 199             |
| Diabetes mellitus         | Female | 0-6 days    | 10-14 years | Data Rich  | -1        | 2     | Mean birth weight                                 | 186             |
| Diabetes mellitus         | Female | 0-6 days    | 10-14 years | Data Rich  | -1        | 2     | Age-standardized underweight (weight-for-age) SEV | 368             |
| Diabetes mellitus         | Female | 0-6 days    | 10-14 years | Data Rich  | -1        | 2     | Age-standardized stunting (height-for-age) SEV    | 470             |
| Diabetes mellitus         | Female | 0-6 days    | 10-14 years | Data Rich  | 1         | 2     | Age-Specific Fertility Rate                       | 945             |
| Diabetes mellitus         | Female | 0-6 days    | 10-14 years | Data Rich  | 1         | 2     | Absolute value of average latitude                | --              |
| Diabetes mellitus         | Female | 0-6 days    | 10-14 years | Data Rich  | 1         | 2     | Live Births 35+ (proportion)                      | --              |
| Diabetes mellitus         | Female | 0-6 days    | 10-14 years | Data Rich  | 1         | 2     | Live Births 40+ (proportion)                      | --              |
| Diabetes mellitus         | Female | 0-6 days    | 10-14 years | Data Rich  | -1        | 3     | Education (years per capita)                      | 198             |
| Diabetes mellitus         | Female | 0-6 days    | 10-14 years | Data Rich  | -1        | 3     | Socio-demographic Index                           | 252             |
| Diabetes mellitus         | Female | 0-6 days    | 10-14 years | Global     | -1        | 1     | Healthcare access and quality index               | 632             |
| Diabetes mellitus         | Female | 0-6 days    | 10-14 years | Global     | -1        | 2     | Age-standardized stunting (height-for-age) SEV    | 733             |
| Diabetes mellitus         | Female | 0-6 days    | 10-14 years | Global     | -1        | 2     | Age-standardized underweight (weight-for-age) SEV | 733             |
| Diabetes mellitus         | Female | 0-6 days    | 10-14 years | Global     | -1        | 2     | Mean birth weight                                 | --              |
| Diabetes mellitus         | Female | 0-6 days    | 10-14 years | Global     | 1         | 2     | Age-Specific Fertility Rate                       | 733             |
| Diabetes mellitus         | Female | 0-6 days    | 10-14 years | Global     | 1         | 2     | Absolute value of average latitude                | --              |
| Diabetes mellitus         | Female | 0-6 days    | 10-14 years | Global     | 1         | 2     | Live Births 35+ (proportion)                      | --              |
| Diabetes mellitus         | Female | 0-6 days    | 10-14 years | Global     | 1         | 2     | Live Births 40+ (proportion)                      | --              |
| Diabetes mellitus         | Female | 0-6 days    | 10-14 years | Global     | -1        | 3     | Education (years per capita)                      | 354             |
| Diabetes mellitus         | Female | 0-6 days    | 10-14 years | Global     | -1        | 3     | Socio-demographic Index                           | 354             |
| Diabetes mellitus         | Female | 15-19 years | 95+ years   | Data Rich  | 1         | 1     | Mean BMI                                          | 483             |
| Diabetes mellitus         | Female | 15-19 years | 95+ years   | Data Rich  | 1         | 1     | Diabetes Age-Standardized Prevalence (proportion) | 517             |
| Diabetes mellitus         | Female | 15-19 years | 95+ years   | Data Rich  | 1         | 1     | Diabetes Fasting Plasma Glucose (mmol/L)          | 530             |
| Diabetes mellitus         | Female | 15-19 years | 95+ years   | Data Rich  | 1         | 1     | Prevalence of obesity                             | 592             |
| Diabetes mellitus         | Female | 15-19 years | 95+ years   | Data Rich  | 0         | 2     | vegetables adjusted(g)                            | 390             |
| Diabetes mellitus         | Female | 15-19 years | 95+ years   | Data Rich  | 0         | 2     | Cholesterol (total, mean per capita)              | 606             |
| Diabetes mellitus         | Female | 15-19 years | 95+ years   | Data Rich  | 0         | 2     | Systolic Blood Pressure (mmHg)                    | 803             |
| Diabetes mellitus         | Female | 15-19 years | 95+ years   | Data Rich  | 0         | 2     | fruits adjusted(g)                                | --              |
| Diabetes mellitus         | Female | 15-19 years | 95+ years   | Data Rich  | 1         | 2     | sugar adjusted(g)                                 | 504             |
| Diabetes mellitus         | Female | 15-19 years | 95+ years   | Data Rich  | 0         | 3     | Education (years per capita)                      | 284             |
| Diabetes mellitus         | Female | 15-19 years | 95+ years   | Data Rich  | 0         | 3     | Healthcare access and quality index               | 313             |
| Diabetes mellitus         | Female | 15-19 years | 95+ years   | Data Rich  | 0         | 3     | LDI (I\$ per capita)                              | --              |
| Diabetes mellitus         | Female | 15-19 years | 95+ years   | Global     | 1         | 1     | Mean BMI                                          | 99              |
| Diabetes mellitus         | Female | 15-19 years | 95+ years   | Global     | 1         | 1     | Diabetes Fasting Plasma Glucose (mmol/L)          | 442             |
| Diabetes mellitus         | Female | 15-19 years | 95+ years   | Global     | 1         | 1     | Prevalence of obesity                             | 620             |
| Diabetes mellitus         | Female | 15-19 years | 95+ years   | Global     | 1         | 1     | Diabetes Age-Standardized Prevalence (proportion) | 985             |
| Diabetes mellitus         | Female | 15-19 years | 95+ years   | Global     | 0         | 2     | vegetables adjusted(g)                            | 245             |
| Diabetes mellitus         | Female | 15-19 years | 95+ years   | Global     | 0         | 2     | Systolic Blood Pressure (mmHg)                    | 915             |
| Diabetes mellitus         | Female | 15-19 years | 95+ years   | Global     | 0         | 2     | Cholesterol (total, mean per capita)              | 928             |
| Diabetes mellitus         | Female | 15-19 years | 95+ years   | Global     | 0         | 2     | fruits adjusted(g)                                | --              |
| Diabetes mellitus         | Female | 15-19 years | 95+ years   | Global     | 1         | 2     | sugar adjusted(g)                                 | 781             |
| Diabetes mellitus         | Female | 15-19 years | 95+ years   | Global     | 0         | 3     | Education (years per capita)                      | 504             |
| Diabetes mellitus         | Female | 15-19 years | 95+ years   | Global     | 0         | 3     | Healthcare access and quality index               | 670             |
| Diabetes mellitus         | Female | 15-19 years | 95+ years   | Global     | 0         | 3     | LDI (I\$ per capita)                              | --              |
| Diabetes mellitus         | Male   | 0-6 days    | 10-14 years | Data Rich  | -1        | 1     | Healthcare access and quality index               | 793             |



**Appendix Table 9: CODEm covariates used, level of covariate, and expected direction of covariate by cause, sex, and age**  
*Covariates that CODEm did not select during the covariate selection process have no draw counts listed.*

| Cause                    | Sex    | Age Start   | Age End     | Model Type | Direction | Level | Covariate Name                                    | Number of Draws |
|--------------------------|--------|-------------|-------------|------------|-----------|-------|---------------------------------------------------|-----------------|
| Diabetes mellitus        | Male   | 0-6 days    | 10-14 years | Data Rich  | -1        | 2     | Age-standardized stunting (height-for-age) SEV    | 549             |
| Diabetes mellitus        | Male   | 0-6 days    | 10-14 years | Data Rich  | -1        | 2     | Age-standardized underweight (weight-for-age) SEV | 584             |
| Diabetes mellitus        | Male   | 0-6 days    | 10-14 years | Data Rich  | -1        | 2     | Mean birth weight                                 | 718             |
| Diabetes mellitus        | Male   | 0-6 days    | 10-14 years | Data Rich  | 1         | 2     | Live Births 35+ (proportion)                      | 207             |
| Diabetes mellitus        | Male   | 0-6 days    | 10-14 years | Data Rich  | 1         | 2     | Absolute value of average latitude                | --              |
| Diabetes mellitus        | Male   | 0-6 days    | 10-14 years | Data Rich  | 1         | 2     | Age-Specific Fertility Rate                       | --              |
| Diabetes mellitus        | Male   | 0-6 days    | 10-14 years | Data Rich  | 1         | 2     | Live Births 40+ (proportion)                      | --              |
| Diabetes mellitus        | Male   | 0-6 days    | 10-14 years | Data Rich  | -1        | 3     | Education (years per capita)                      | 265             |
| Diabetes mellitus        | Male   | 0-6 days    | 10-14 years | Data Rich  | -1        | 3     | Socio-demographic Index                           | 347             |
| Diabetes mellitus        | Male   | 0-6 days    | 10-14 years | Global     | -1        | 1     | Healthcare access and quality index               | 718             |
| Diabetes mellitus        | Male   | 0-6 days    | 10-14 years | Global     | -1        | 2     | Age-standardized stunting (height-for-age) SEV    | 666             |
| Diabetes mellitus        | Male   | 0-6 days    | 10-14 years | Global     | -1        | 2     | Age-standardized underweight (weight-for-age) SEV | 666             |
| Diabetes mellitus        | Male   | 0-6 days    | 10-14 years | Global     | -1        | 2     | Mean birth weight                                 | 666             |
| Diabetes mellitus        | Male   | 0-6 days    | 10-14 years | Global     | 1         | 2     | Live Births 35+ (proportion)                      | 282             |
| Diabetes mellitus        | Male   | 0-6 days    | 10-14 years | Global     | 1         | 2     | Absolute value of average latitude                | --              |
| Diabetes mellitus        | Male   | 0-6 days    | 10-14 years | Global     | 1         | 2     | Age-Specific Fertility Rate                       | --              |
| Diabetes mellitus        | Male   | 0-6 days    | 10-14 years | Global     | 1         | 2     | Live Births 40+ (proportion)                      | --              |
| Diabetes mellitus        | Male   | 0-6 days    | 10-14 years | Global     | -1        | 3     | Education (years per capita)                      | 424             |
| Diabetes mellitus        | Male   | 0-6 days    | 10-14 years | Global     | -1        | 3     | Socio-demographic Index                           | 424             |
| Diabetes mellitus        | Male   | 15-19 years | 95+ years   | Data Rich  | 1         | 1     | Prevalence of obesity                             | 76              |
| Diabetes mellitus        | Male   | 15-19 years | 95+ years   | Data Rich  | 1         | 1     | Diabetes Age-Standardized Prevalence (proportion) | 297             |
| Diabetes mellitus        | Male   | 15-19 years | 95+ years   | Data Rich  | 1         | 1     | Diabetes Fasting Plasma Glucose (mmol/L)          | 417             |
| Diabetes mellitus        | Male   | 15-19 years | 95+ years   | Data Rich  | 1         | 1     | Mean BMI                                          | 879             |
| Diabetes mellitus        | Male   | 15-19 years | 95+ years   | Data Rich  | 0         | 2     | vegetables adjusted(g)                            | 755             |
| Diabetes mellitus        | Male   | 15-19 years | 95+ years   | Data Rich  | 0         | 2     | Cholesterol (total, mean per capita)              | 775             |
| Diabetes mellitus        | Male   | 15-19 years | 95+ years   | Data Rich  | 0         | 2     | Systolic Blood Pressure (mmHg)                    | 931             |
| Diabetes mellitus        | Male   | 15-19 years | 95+ years   | Data Rich  | 0         | 2     | fruits adjusted(g)                                | --              |
| Diabetes mellitus        | Male   | 15-19 years | 95+ years   | Data Rich  | 1         | 2     | sugar adjusted(g)                                 | 0               |
| Diabetes mellitus        | Male   | 15-19 years | 95+ years   | Data Rich  | 0         | 3     | Education (years per capita)                      | 387             |
| Diabetes mellitus        | Male   | 15-19 years | 95+ years   | Data Rich  | 0         | 3     | Healthcare access and quality index               | 410             |
| Diabetes mellitus        | Male   | 15-19 years | 95+ years   | Data Rich  | 0         | 3     | LDI (I\$ per capita)                              | --              |
| Diabetes mellitus        | Male   | 15-19 years | 95+ years   | Global     | 1         | 1     | Prevalence of obesity                             | 208             |
| Diabetes mellitus        | Male   | 15-19 years | 95+ years   | Global     | 1         | 1     | Mean BMI                                          | 660             |
| Diabetes mellitus        | Male   | 15-19 years | 95+ years   | Global     | 1         | 1     | Diabetes Fasting Plasma Glucose (mmol/L)          | 670             |
| Diabetes mellitus        | Male   | 15-19 years | 95+ years   | Global     | 1         | 1     | Diabetes Age-Standardized Prevalence (proportion) | 1000            |
| Diabetes mellitus        | Male   | 15-19 years | 95+ years   | Global     | 0         | 2     | Systolic Blood Pressure (mmHg)                    | 295             |
| Diabetes mellitus        | Male   | 15-19 years | 95+ years   | Global     | 0         | 2     | vegetables adjusted(g)                            | 586             |
| Diabetes mellitus        | Male   | 15-19 years | 95+ years   | Global     | 0         | 2     | Cholesterol (total, mean per capita)              | 615             |
| Diabetes mellitus        | Male   | 15-19 years | 95+ years   | Global     | 0         | 2     | fruits adjusted(g)                                | --              |
| Diabetes mellitus        | Male   | 15-19 years | 95+ years   | Global     | 1         | 2     | sugar adjusted(g)                                 | --              |
| Diabetes mellitus        | Male   | 15-19 years | 95+ years   | Global     | 0         | 3     | Education (years per capita)                      | 529             |
| Diabetes mellitus        | Male   | 15-19 years | 95+ years   | Global     | 0         | 3     | Healthcare access and quality index               | 593             |
| Diabetes mellitus        | Male   | 15-19 years | 95+ years   | Global     | 0         | 3     | LDI (I\$ per capita)                              | --              |
| Diabetes mellitus type 1 | Female | 0-6 days    | 95+ years   | Data Rich  | -1        | 1     | Healthcare access and quality index               | 1000            |
| Diabetes mellitus type 1 | Female | 0-6 days    | 95+ years   | Data Rich  | -1        | 2     | Age-standardized stunting (height-for-age) SEV    | 354             |
| Diabetes mellitus type 1 | Female | 0-6 days    | 95+ years   | Data Rich  | -1        | 2     | Age-standardized underweight (weight-for-age) SEV | --              |
| Diabetes mellitus type 1 | Female | 0-6 days    | 95+ years   | Data Rich  | -1        | 2     | Mean birth weight                                 | --              |
| Diabetes mellitus type 1 | Female | 0-6 days    | 95+ years   | Data Rich  | 1         | 2     | Absolute value of average latitude                | 158             |
| Diabetes mellitus type 1 | Female | 0-6 days    | 95+ years   | Data Rich  | 1         | 2     | Age-Specific Fertility Rate                       | --              |
| Diabetes mellitus type 1 | Female | 0-6 days    | 95+ years   | Data Rich  | 1         | 2     | Live Births 35+ (proportion)                      | --              |
| Diabetes mellitus type 1 | Female | 0-6 days    | 95+ years   | Data Rich  | 1         | 2     | Live Births 40+ (proportion)                      | --              |
| Diabetes mellitus type 1 | Female | 0-6 days    | 95+ years   | Data Rich  | -1        | 3     | Socio-demographic Index                           | 145             |
| Diabetes mellitus type 1 | Female | 0-6 days    | 95+ years   | Data Rich  | -1        | 3     | Education (years per capita)                      | 491             |
| Diabetes mellitus type 1 | Female | 0-6 days    | 95+ years   | Global     | -1        | 1     | Healthcare access and quality index               | 1000            |
| Diabetes mellitus type 1 | Female | 0-6 days    | 95+ years   | Global     | -1        | 2     | Age-standardized underweight (weight-for-age) SEV | 498             |
| Diabetes mellitus type 1 | Female | 0-6 days    | 95+ years   | Global     | -1        | 2     | Age-standardized stunting (height-for-age) SEV    | 555             |
| Diabetes mellitus type 1 | Female | 0-6 days    | 95+ years   | Global     | -1        | 2     | Mean birth weight                                 | --              |
| Diabetes mellitus type 1 | Female | 0-6 days    | 95+ years   | Global     | 1         | 2     | Absolute value of average latitude                | 269             |
| Diabetes mellitus type 1 | Female | 0-6 days    | 95+ years   | Global     | 1         | 2     | Age-Specific Fertility Rate                       | --              |
| Diabetes mellitus type 1 | Female | 0-6 days    | 95+ years   | Global     | 1         | 2     | Live Births 35+ (proportion)                      | --              |
| Diabetes mellitus type 1 | Female | 0-6 days    | 95+ years   | Global     | 1         | 2     | Live Births 40+ (proportion)                      | --              |
| Diabetes mellitus type 1 | Female | 0-6 days    | 95+ years   | Global     | -1        | 3     | Education (years per capita)                      | 450             |
| Diabetes mellitus type 1 | Female | 0-6 days    | 95+ years   | Global     | -1        | 3     | Socio-demographic Index                           | --              |
| Diabetes mellitus type 1 | Male   | 0-6 days    | 95+ years   | Data Rich  | -1        | 1     | Healthcare access and quality index               | 1000            |
| Diabetes mellitus type 1 | Male   | 0-6 days    | 95+ years   | Data Rich  | -1        | 2     | Mean birth weight                                 | 177             |
| Diabetes mellitus type 1 | Male   | 0-6 days    | 95+ years   | Data Rich  | -1        | 2     | Age-standardized underweight (weight-for-age) SEV | 430             |
| Diabetes mellitus type 1 | Male   | 0-6 days    | 95+ years   | Data Rich  | -1        | 2     | Age-standardized stunting (height-for-age) SEV    | 437             |
| Diabetes mellitus type 1 | Male   | 0-6 days    | 95+ years   | Data Rich  | 1         | 2     | Absolute value of average latitude                | 195             |
| Diabetes mellitus type 1 | Male   | 0-6 days    | 95+ years   | Data Rich  | 1         | 2     | Age-Specific Fertility Rate                       | --              |
| Diabetes mellitus type 1 | Male   | 0-6 days    | 95+ years   | Data Rich  | 1         | 2     | Live Births 35+ (proportion)                      | --              |
| Diabetes mellitus type 1 | Male   | 0-6 days    | 95+ years   | Data Rich  | 1         | 2     | Live Births 40+ (proportion)                      | --              |
| Diabetes mellitus type 1 | Male   | 0-6 days    | 95+ years   | Data Rich  | -1        | 3     | Socio-demographic Index                           | 72              |
| Diabetes mellitus type 1 | Male   | 0-6 days    | 95+ years   | Data Rich  | -1        | 3     | Education (years per capita)                      | 492             |
| Diabetes mellitus type 1 | Male   | 0-6 days    | 95+ years   | Global     | -1        | 1     | Healthcare access and quality index               | 1000            |
| Diabetes mellitus type 1 | Male   | 0-6 days    | 95+ years   | Global     | -1        | 2     | Age-standardized underweight (weight-for-age) SEV | 341             |
| Diabetes mellitus type 1 | Male   | 0-6 days    | 95+ years   | Global     | -1        | 2     | Mean birth weight                                 | 440             |
| Diabetes mellitus type 1 | Male   | 0-6 days    | 95+ years   | Global     | -1        | 2     | Age-standardized stunting (height-for-age) SEV    | 662             |
| Diabetes mellitus type 1 | Male   | 0-6 days    | 95+ years   | Global     | 1         | 2     | Absolute value of average latitude                | 119             |



**Appendix Table 9: CODEm covariates used, level of covariate, and expected direction of covariate by cause, sex, and age**  
*Covariates that CODEm did not select during the covariate selection process have no draw counts listed.*

| Cause                    | Sex    | Age Start   | Age End   | Model Type | Direction | Level | Covariate Name                                    | Number of Draws |
|--------------------------|--------|-------------|-----------|------------|-----------|-------|---------------------------------------------------|-----------------|
| Diabetes mellitus type 1 | Male   | 0-6 days    | 95+ years | Global     | 1         | 2     | Age-Specific Fertility Rate                       | --              |
| Diabetes mellitus type 1 | Male   | 0-6 days    | 95+ years | Global     | 1         | 2     | Live Births 35+ (proportion)                      | --              |
| Diabetes mellitus type 1 | Male   | 0-6 days    | 95+ years | Global     | 1         | 2     | Live Births 40+ (proportion)                      | --              |
| Diabetes mellitus type 1 | Male   | 0-6 days    | 95+ years | Global     | -1        | 3     | Education (years per capita)                      | 414             |
| Diabetes mellitus type 1 | Male   | 0-6 days    | 95+ years | Global     | -1        | 3     | Socio-demographic Index                           | --              |
| Diabetes mellitus type 2 | Female | 15-19 years | 95+ years | Data Rich  | 1         | 1     | Prevalence of obesity                             | 487             |
| Diabetes mellitus type 2 | Female | 15-19 years | 95+ years | Data Rich  | 1         | 1     | Mean BMI                                          | 489             |
| Diabetes mellitus type 2 | Female | 15-19 years | 95+ years | Data Rich  | 1         | 1     | Diabetes Fasting Plasma Glucose (mmol/L)          | 742             |
| Diabetes mellitus type 2 | Female | 15-19 years | 95+ years | Data Rich  | 1         | 1     | Diabetes Age-Standardized Prevalence (proportion) | 942             |
| Diabetes mellitus type 2 | Female | 15-19 years | 95+ years | Data Rich  | 0         | 2     | fruits adjusted(g)                                | 654             |
| Diabetes mellitus type 2 | Female | 15-19 years | 95+ years | Data Rich  | 0         | 2     | Alcohol SEV, age and sex specific                 | 788             |
| Diabetes mellitus type 2 | Female | 15-19 years | 95+ years | Data Rich  | 0         | 2     | Cholesterol (total, mean per capita)              | 869             |
| Diabetes mellitus type 2 | Female | 15-19 years | 95+ years | Data Rich  | 0         | 2     | Systolic Blood Pressure (mmHg)                    | 900             |
| Diabetes mellitus type 2 | Female | 15-19 years | 95+ years | Data Rich  | 0         | 2     | vegetables adjusted(g)                            | 951             |
| Diabetes mellitus type 2 | Female | 15-19 years | 95+ years | Data Rich  | 1         | 2     | sugar adjusted(g)                                 | 1               |
| Diabetes mellitus type 2 | Female | 15-19 years | 95+ years | Data Rich  | 0         | 3     | Healthcare access and quality index               | 333             |
| Diabetes mellitus type 2 | Female | 15-19 years | 95+ years | Data Rich  | 0         | 3     | Education (years per capita)                      | 334             |
| Diabetes mellitus type 2 | Female | 15-19 years | 95+ years | Data Rich  | 0         | 3     | LDI (I\$ per capita)                              | --              |
| Diabetes mellitus type 2 | Female | 15-19 years | 95+ years | Global     | 1         | 1     | Prevalence of obesity                             | 241             |
| Diabetes mellitus type 2 | Female | 15-19 years | 95+ years | Global     | 1         | 1     | Mean BMI                                          | 537             |
| Diabetes mellitus type 2 | Female | 15-19 years | 95+ years | Global     | 1         | 1     | Diabetes Fasting Plasma Glucose (mmol/L)          | 556             |
| Diabetes mellitus type 2 | Female | 15-19 years | 95+ years | Global     | 1         | 1     | Diabetes Age-Standardized Prevalence (proportion) | 837             |
| Diabetes mellitus type 2 | Female | 15-19 years | 95+ years | Global     | 0         | 2     | Cholesterol (total, mean per capita)              | 219             |
| Diabetes mellitus type 2 | Female | 15-19 years | 95+ years | Global     | 0         | 2     | vegetables adjusted(g)                            | 253             |
| Diabetes mellitus type 2 | Female | 15-19 years | 95+ years | Global     | 0         | 2     | Systolic Blood Pressure (mmHg)                    | 256             |
| Diabetes mellitus type 2 | Female | 15-19 years | 95+ years | Global     | 0         | 2     | fruits adjusted(g)                                | 412             |
| Diabetes mellitus type 2 | Female | 15-19 years | 95+ years | Global     | 0         | 2     | Alcohol SEV, age and sex specific                 | 546             |
| Diabetes mellitus type 2 | Female | 15-19 years | 95+ years | Global     | 1         | 2     | sugar adjusted(g)                                 | 252             |
| Diabetes mellitus type 2 | Female | 15-19 years | 95+ years | Global     | 0         | 3     | Education (years per capita)                      | 379             |
| Diabetes mellitus type 2 | Female | 15-19 years | 95+ years | Global     | 0         | 3     | Healthcare access and quality index               | 443             |
| Diabetes mellitus type 2 | Female | 15-19 years | 95+ years | Global     | 0         | 3     | LDI (I\$ per capita)                              | --              |
| Diabetes mellitus type 2 | Male   | 15-19 years | 95+ years | Data Rich  | 1         | 1     | Diabetes Age-Standardized Prevalence (proportion) | 83              |
| Diabetes mellitus type 2 | Male   | 15-19 years | 95+ years | Data Rich  | 1         | 1     | Prevalence of obesity                             | 88              |
| Diabetes mellitus type 2 | Male   | 15-19 years | 95+ years | Data Rich  | 1         | 1     | Diabetes Fasting Plasma Glucose (mmol/L)          | 102             |
| Diabetes mellitus type 2 | Male   | 15-19 years | 95+ years | Data Rich  | 1         | 1     | Mean BMI                                          | 912             |
| Diabetes mellitus type 2 | Male   | 15-19 years | 95+ years | Data Rich  | 0         | 2     | Alcohol SEV, age and sex specific                 | 583             |
| Diabetes mellitus type 2 | Male   | 15-19 years | 95+ years | Data Rich  | 0         | 2     | Cholesterol (total, mean per capita)              | 703             |
| Diabetes mellitus type 2 | Male   | 15-19 years | 95+ years | Data Rich  | 0         | 2     | fruits adjusted(g)                                | 720             |
| Diabetes mellitus type 2 | Male   | 15-19 years | 95+ years | Data Rich  | 0         | 2     | vegetables adjusted(g)                            | 879             |
| Diabetes mellitus type 2 | Male   | 15-19 years | 95+ years | Data Rich  | 0         | 2     | Systolic Blood Pressure (mmHg)                    | 984             |
| Diabetes mellitus type 2 | Male   | 15-19 years | 95+ years | Data Rich  | 1         | 2     | sugar adjusted(g)                                 | 0               |
| Diabetes mellitus type 2 | Male   | 15-19 years | 95+ years | Data Rich  | 0         | 3     | Education (years per capita)                      | 163             |
| Diabetes mellitus type 2 | Male   | 15-19 years | 95+ years | Data Rich  | 0         | 3     | Healthcare access and quality index               | 501             |
| Diabetes mellitus type 2 | Male   | 15-19 years | 95+ years | Data Rich  | 0         | 3     | LDI (I\$ per capita)                              | --              |
| Diabetes mellitus type 2 | Male   | 15-19 years | 95+ years | Global     | 1         | 1     | Diabetes Fasting Plasma Glucose (mmol/L)          | 184             |
| Diabetes mellitus type 2 | Male   | 15-19 years | 95+ years | Global     | 1         | 1     | Prevalence of obesity                             | 270             |
| Diabetes mellitus type 2 | Male   | 15-19 years | 95+ years | Global     | 1         | 1     | Mean BMI                                          | 418             |
| Diabetes mellitus type 2 | Male   | 15-19 years | 95+ years | Global     | 1         | 1     | Diabetes Age-Standardized Prevalence (proportion) | 1000            |
| Diabetes mellitus type 2 | Male   | 15-19 years | 95+ years | Global     | 0         | 2     | Cholesterol (total, mean per capita)              | 361             |
| Diabetes mellitus type 2 | Male   | 15-19 years | 95+ years | Global     | 0         | 2     | Systolic Blood Pressure (mmHg)                    | 542             |
| Diabetes mellitus type 2 | Male   | 15-19 years | 95+ years | Global     | 0         | 2     | Alcohol SEV, age and sex specific                 | 587             |
| Diabetes mellitus type 2 | Male   | 15-19 years | 95+ years | Global     | 0         | 2     | fruits adjusted(g)                                | 590             |
| Diabetes mellitus type 2 | Male   | 15-19 years | 95+ years | Global     | 0         | 2     | vegetables adjusted(g)                            | 590             |
| Diabetes mellitus type 2 | Male   | 15-19 years | 95+ years | Global     | 1         | 2     | sugar adjusted(g)                                 | 48              |
| Diabetes mellitus type 2 | Male   | 15-19 years | 95+ years | Global     | 0         | 3     | Healthcare access and quality index               | 471             |
| Diabetes mellitus type 2 | Male   | 15-19 years | 95+ years | Global     | 0         | 3     | Education (years per capita)                      | 507             |
| Diabetes mellitus type 2 | Male   | 15-19 years | 95+ years | Global     | 0         | 3     | LDI (I\$ per capita)                              | --              |
| Chronic kidney disease   | Female | 28-364 days | 95+ years | Data Rich  | -1        | 1     | Healthcare access and quality index               | 9               |
| Chronic kidney disease   | Female | 28-364 days | 95+ years | Data Rich  | 1         | 1     | Systolic Blood Pressure (mmHg)                    | 1               |
| Chronic kidney disease   | Female | 28-364 days | 95+ years | Data Rich  | 1         | 1     | Mean BMI                                          | 41              |
| Chronic kidney disease   | Female | 28-364 days | 95+ years | Data Rich  | 1         | 1     | Diabetes Age-Standardized Prevalence (proportion) | 248             |
| Chronic kidney disease   | Female | 28-364 days | 95+ years | Data Rich  | 1         | 1     | Diabetes Fasting Plasma Glucose (mmol/L)          | 921             |
| Chronic kidney disease   | Female | 28-364 days | 95+ years | Data Rich  | 0         | 2     | red meats adjusted(g)                             | 138             |
| Chronic kidney disease   | Female | 28-364 days | 95+ years | Data Rich  | 1         | 2     | Cholesterol (total, mean per capita)              | 0               |
| Chronic kidney disease   | Female | 28-364 days | 95+ years | Data Rich  | 1         | 2     | energy unadjusted(kcal)                           | 518             |
| Chronic kidney disease   | Female | 28-364 days | 95+ years | Data Rich  | -1        | 3     | Education (years per capita)                      | 116             |
| Chronic kidney disease   | Female | 28-364 days | 95+ years | Data Rich  | -1        | 3     | LDI (I\$ per capita)                              | --              |
| Chronic kidney disease   | Female | 28-364 days | 95+ years | Data Rich  | 0         | 3     | Socio-demographic Index                           | 163             |
| Chronic kidney disease   | Female | 28-364 days | 95+ years | Global     | -1        | 1     | Healthcare access and quality index               | 388             |
| Chronic kidney disease   | Female | 28-364 days | 95+ years | Global     | 1         | 1     | Systolic Blood Pressure (mmHg)                    | 19              |
| Chronic kidney disease   | Female | 28-364 days | 95+ years | Global     | 1         | 1     | Diabetes Age-Standardized Prevalence (proportion) | 59              |
| Chronic kidney disease   | Female | 28-364 days | 95+ years | Global     | 1         | 1     | Diabetes Fasting Plasma Glucose (mmol/L)          | 954             |
| Chronic kidney disease   | Female | 28-364 days | 95+ years | Global     | 1         | 1     | Mean BMI                                          | 1000            |
| Chronic kidney disease   | Female | 28-364 days | 95+ years | Global     | 0         | 2     | red meats adjusted(g)                             | 444             |
| Chronic kidney disease   | Female | 28-364 days | 95+ years | Global     | 1         | 2     | Cholesterol (total, mean per capita)              | 0               |
| Chronic kidney disease   | Female | 28-364 days | 95+ years | Global     | 1         | 2     | energy unadjusted(kcal)                           | 0               |
| Chronic kidney disease   | Female | 28-364 days | 95+ years | Global     | -1        | 3     | Education (years per capita)                      | 647             |
| Chronic kidney disease   | Female | 28-364 days | 95+ years | Global     | -1        | 3     | LDI (I\$ per capita)                              | --              |

**Appendix Table 9: CODEm covariates used, level of covariate, and expected direction of covariate by cause, sex, and age**

*Covariates that CODEm did not select during the covariate selection process have no draw counts listed.*

| Cause                          | Sex    | Age Start   | Age End   | Model Type | Direction | Level | Covariate Name                                    | Number of Draws |
|--------------------------------|--------|-------------|-----------|------------|-----------|-------|---------------------------------------------------|-----------------|
| Chronic kidney disease         | Female | 28-364 days | 95+ years | Global     | 0         | 3     | Socio-demographic Index                           | 489             |
| Chronic kidney disease         | Male   | 28-364 days | 95+ years | Data Rich  | -1        | 1     | Healthcare access and quality index               | 48              |
| Chronic kidney disease         | Male   | 28-364 days | 95+ years | Data Rich  | 1         | 1     | Systolic Blood Pressure (mmHg)                    | 1               |
| Chronic kidney disease         | Male   | 28-364 days | 95+ years | Data Rich  | 1         | 1     | Mean BMI                                          | 130             |
| Chronic kidney disease         | Male   | 28-364 days | 95+ years | Data Rich  | 1         | 1     | Diabetes Fasting Plasma Glucose (mmol/L)          | 427             |
| Chronic kidney disease         | Male   | 28-364 days | 95+ years | Data Rich  | 1         | 1     | Diabetes Age-Standardized Prevalence (proportion) | 790             |
| Chronic kidney disease         | Male   | 28-364 days | 95+ years | Data Rich  | 0         | 2     | red meats adjusted(g)                             | 273             |
| Chronic kidney disease         | Male   | 28-364 days | 95+ years | Data Rich  | 1         | 2     | Cholesterol (total, mean per capita)              | 3               |
| Chronic kidney disease         | Male   | 28-364 days | 95+ years | Data Rich  | 1         | 2     | energy unadjusted(kcal)                           | 105             |
| Chronic kidney disease         | Male   | 28-364 days | 95+ years | Data Rich  | -1        | 3     | Education (years per capita)                      | 68              |
| Chronic kidney disease         | Male   | 28-364 days | 95+ years | Data Rich  | -1        | 3     | LDI (IS per capita)                               | --              |
| Chronic kidney disease         | Male   | 28-364 days | 95+ years | Data Rich  | 0         | 3     | Socio-demographic Index                           | 114             |
| Chronic kidney disease         | Male   | 28-364 days | 95+ years | Global     | -1        | 1     | Healthcare access and quality index               | 363             |
| Chronic kidney disease         | Male   | 28-364 days | 95+ years | Global     | 1         | 1     | Systolic Blood Pressure (mmHg)                    | 0               |
| Chronic kidney disease         | Male   | 28-364 days | 95+ years | Global     | 1         | 1     | Diabetes Fasting Plasma Glucose (mmol/L)          | 452             |
| Chronic kidney disease         | Male   | 28-364 days | 95+ years | Global     | 1         | 1     | Mean BMI                                          | 828             |
| Chronic kidney disease         | Male   | 28-364 days | 95+ years | Global     | 1         | 1     | Diabetes Age-Standardized Prevalence (proportion) | 860             |
| Chronic kidney disease         | Male   | 28-364 days | 95+ years | Global     | 0         | 2     | red meats adjusted(g)                             | 319             |
| Chronic kidney disease         | Male   | 28-364 days | 95+ years | Global     | 1         | 2     | Cholesterol (total, mean per capita)              | 0               |
| Chronic kidney disease         | Male   | 28-364 days | 95+ years | Global     | 1         | 2     | energy unadjusted(kcal)                           | 107             |
| Chronic kidney disease         | Male   | 28-364 days | 95+ years | Global     | -1        | 3     | Education (years per capita)                      | 215             |
| Chronic kidney disease         | Male   | 28-364 days | 95+ years | Global     | -1        | 3     | LDI (IS per capita)                               | --              |
| Chronic kidney disease         | Male   | 28-364 days | 95+ years | Global     | 0         | 3     | Socio-demographic Index                           | 257             |
| Acute glomerulonephritis       | Female | 28-364 days | 95+ years | Data Rich  | -1        | 2     | Sanitation (proportion with access)               | 601             |
| Acute glomerulonephritis       | Female | 28-364 days | 95+ years | Data Rich  | -1        | 2     | Improved Water Source (proportion with access)    | 760             |
| Acute glomerulonephritis       | Female | 28-364 days | 95+ years | Data Rich  | -1        | 2     | Healthcare access and quality index               | 935             |
| Acute glomerulonephritis       | Female | 28-364 days | 95+ years | Data Rich  | 1         | 2     | Systolic Blood Pressure (mmHg)                    | 0               |
| Acute glomerulonephritis       | Female | 28-364 days | 95+ years | Data Rich  | 1         | 2     | Diabetes Age-Standardized Prevalence (proportion) | --              |
| Acute glomerulonephritis       | Female | 28-364 days | 95+ years | Data Rich  | -1        | 3     | Education (years per capita)                      | 16              |
| Acute glomerulonephritis       | Female | 28-364 days | 95+ years | Data Rich  | -1        | 3     | Socio-demographic Index                           | 43              |
| Acute glomerulonephritis       | Female | 28-364 days | 95+ years | Data Rich  | -1        | 3     | LDI (IS per capita)                               | --              |
| Acute glomerulonephritis       | Female | 28-364 days | 95+ years | Global     | -1        | 2     | Healthcare access and quality index               | 492             |
| Acute glomerulonephritis       | Female | 28-364 days | 95+ years | Global     | -1        | 2     | Sanitation (proportion with access)               | 558             |
| Acute glomerulonephritis       | Female | 28-364 days | 95+ years | Global     | -1        | 2     | Improved Water Source (proportion with access)    | 728             |
| Acute glomerulonephritis       | Female | 28-364 days | 95+ years | Global     | 1         | 2     | Systolic Blood Pressure (mmHg)                    | 15              |
| Acute glomerulonephritis       | Female | 28-364 days | 95+ years | Global     | 1         | 2     | Diabetes Age-Standardized Prevalence (proportion) | --              |
| Acute glomerulonephritis       | Female | 28-364 days | 95+ years | Global     | -1        | 3     | Education (years per capita)                      | 207             |
| Acute glomerulonephritis       | Female | 28-364 days | 95+ years | Global     | -1        | 3     | Socio-demographic Index                           | 219             |
| Acute glomerulonephritis       | Female | 28-364 days | 95+ years | Global     | -1        | 3     | LDI (IS per capita)                               | --              |
| Acute glomerulonephritis       | Male   | 28-364 days | 95+ years | Data Rich  | -1        | 2     | Sanitation (proportion with access)               | 491             |
| Acute glomerulonephritis       | Male   | 28-364 days | 95+ years | Data Rich  | -1        | 2     | Improved Water Source (proportion with access)    | 592             |
| Acute glomerulonephritis       | Male   | 28-364 days | 95+ years | Data Rich  | -1        | 2     | Healthcare access and quality index               | 941             |
| Acute glomerulonephritis       | Male   | 28-364 days | 95+ years | Data Rich  | 1         | 2     | Systolic Blood Pressure (mmHg)                    | 0               |
| Acute glomerulonephritis       | Male   | 28-364 days | 95+ years | Data Rich  | 1         | 2     | Diabetes Age-Standardized Prevalence (proportion) | 242             |
| Acute glomerulonephritis       | Male   | 28-364 days | 95+ years | Data Rich  | -1        | 3     | Socio-demographic Index                           | 1               |
| Acute glomerulonephritis       | Male   | 28-364 days | 95+ years | Data Rich  | -1        | 3     | Education (years per capita)                      | 58              |
| Acute glomerulonephritis       | Male   | 28-364 days | 95+ years | Data Rich  | -1        | 3     | LDI (IS per capita)                               | --              |
| Acute glomerulonephritis       | Male   | 28-364 days | 95+ years | Global     | -1        | 2     | Sanitation (proportion with access)               | 520             |
| Acute glomerulonephritis       | Male   | 28-364 days | 95+ years | Global     | -1        | 2     | Improved Water Source (proportion with access)    | 538             |
| Acute glomerulonephritis       | Male   | 28-364 days | 95+ years | Global     | -1        | 2     | Healthcare access and quality index               | 744             |
| Acute glomerulonephritis       | Male   | 28-364 days | 95+ years | Global     | 1         | 2     | Systolic Blood Pressure (mmHg)                    | 154             |
| Acute glomerulonephritis       | Male   | 28-364 days | 95+ years | Global     | 1         | 2     | Diabetes Age-Standardized Prevalence (proportion) | --              |
| Acute glomerulonephritis       | Male   | 28-364 days | 95+ years | Global     | -1        | 3     | Education (years per capita)                      | 44              |
| Acute glomerulonephritis       | Male   | 28-364 days | 95+ years | Global     | -1        | 3     | Socio-demographic Index                           | 142             |
| Acute glomerulonephritis       | Male   | 28-364 days | 95+ years | Global     | -1        | 3     | LDI (IS per capita)                               | --              |
| Skin and subcutaneous diseases | Female | 28-364 days | 95+ years | Data Rich  | -1        | 1     | Improved Water Source (proportion with access)    | --              |
| Skin and subcutaneous diseases | Female | 28-364 days | 95+ years | Data Rich  | 1         | 1     | SEV unsafe sanitation                             | --              |
| Skin and subcutaneous diseases | Female | 28-364 days | 95+ years | Data Rich  | -1        | 2     | Healthcare access and quality index               | --              |
| Skin and subcutaneous diseases | Female | 28-364 days | 95+ years | Data Rich  | 1         | 2     | Alcohol (liters per capita)                       | 1000            |
| Skin and subcutaneous diseases | Female | 28-364 days | 95+ years | Data Rich  | 1         | 2     | Cumulative Cigarettes (10 Years)                  | --              |
| Skin and subcutaneous diseases | Female | 28-364 days | 95+ years | Data Rich  | 1         | 2     | Cumulative Cigarettes (5 Years)                   | --              |
| Skin and subcutaneous diseases | Female | 28-364 days | 95+ years | Data Rich  | 1         | 2     | Smoking Prevalence                                | --              |
| Skin and subcutaneous diseases | Female | 28-364 days | 95+ years | Data Rich  | -1        | 3     | Education (years per capita)                      | --              |
| Skin and subcutaneous diseases | Female | 28-364 days | 95+ years | Data Rich  | -1        | 3     | LDI (IS per capita)                               | --              |
| Skin and subcutaneous diseases | Female | 28-364 days | 95+ years | Data Rich  | 0         | 3     | Socio-demographic Index                           | 568             |
| Skin and subcutaneous diseases | Female | 28-364 days | 95+ years | Global     | -1        | 1     | Improved Water Source (proportion with access)    | --              |
| Skin and subcutaneous diseases | Female | 28-364 days | 95+ years | Global     | 1         | 1     | SEV unsafe sanitation                             | --              |
| Skin and subcutaneous diseases | Female | 28-364 days | 95+ years | Global     | -1        | 2     | Healthcare access and quality index               | --              |
| Skin and subcutaneous diseases | Female | 28-364 days | 95+ years | Global     | 1         | 2     | Alcohol (liters per capita)                       | --              |
| Skin and subcutaneous diseases | Female | 28-364 days | 95+ years | Global     | 1         | 2     | Cumulative Cigarettes (10 Years)                  | --              |
| Skin and subcutaneous diseases | Female | 28-364 days | 95+ years | Global     | 1         | 2     | Cumulative Cigarettes (5 Years)                   | --              |
| Skin and subcutaneous diseases | Female | 28-364 days | 95+ years | Global     | 1         | 2     | Smoking Prevalence                                | --              |
| Skin and subcutaneous diseases | Female | 28-364 days | 95+ years | Global     | -1        | 3     | Education (years per capita)                      | --              |
| Skin and subcutaneous diseases | Female | 28-364 days | 95+ years | Global     | -1        | 3     | LDI (IS per capita)                               | --              |
| Skin and subcutaneous diseases | Female | 28-364 days | 95+ years | Global     | 0         | 3     | Socio-demographic Index                           | 1000            |
| Skin and subcutaneous diseases | Male   | 28-364 days | 95+ years | Data Rich  | -1        | 1     | Improved Water Source (proportion with access)    | --              |
| Skin and subcutaneous diseases | Male   | 28-364 days | 95+ years | Data Rich  | 1         | 1     | SEV unsafe sanitation                             | --              |
| Skin and subcutaneous diseases | Male   | 28-364 days | 95+ years | Data Rich  | -1        | 2     | Healthcare access and quality index               | --              |

**Appendix Table 9: CODEm covariates used, level of covariate, and expected direction of covariate by cause, sex, and age**

*Covariates that CODEm did not select during the covariate selection process have no draw counts listed.*

| Cause                          | Sex    | Age Start   | Age End   | Model Type | Direction | Level | Covariate Name                                 | Number of Draws |
|--------------------------------|--------|-------------|-----------|------------|-----------|-------|------------------------------------------------|-----------------|
| Skin and subcutaneous diseases | Male   | 28-364 days | 95+ years | Data Rich  | 1         | 2     | Alcohol (liters per capita)                    | 1000            |
| Skin and subcutaneous diseases | Male   | 28-364 days | 95+ years | Data Rich  | 1         | 2     | Cumulative Cigarettes (10 Years)               | --              |
| Skin and subcutaneous diseases | Male   | 28-364 days | 95+ years | Data Rich  | 1         | 2     | Cumulative Cigarettes (5 Years)                | --              |
| Skin and subcutaneous diseases | Male   | 28-364 days | 95+ years | Data Rich  | 1         | 2     | Smoking Prevalence                             | --              |
| Skin and subcutaneous diseases | Male   | 28-364 days | 95+ years | Data Rich  | -1        | 3     | Education (years per capita)                   | --              |
| Skin and subcutaneous diseases | Male   | 28-364 days | 95+ years | Data Rich  | -1        | 3     | LDI (IS per capita)                            | --              |
| Skin and subcutaneous diseases | Male   | 28-364 days | 95+ years | Data Rich  | 0         | 3     | Socio-demographic Index                        | 568             |
| Skin and subcutaneous diseases | Male   | 28-364 days | 95+ years | Global     | -1        | 1     | Improved Water Source (proportion with access) | --              |
| Skin and subcutaneous diseases | Male   | 28-364 days | 95+ years | Global     | 1         | 1     | SEV unsafe sanitation                          | 674             |
| Skin and subcutaneous diseases | Male   | 28-364 days | 95+ years | Global     | -1        | 2     | Healthcare access and quality index            | --              |
| Skin and subcutaneous diseases | Male   | 28-364 days | 95+ years | Global     | 1         | 2     | Alcohol (liters per capita)                    | 452             |
| Skin and subcutaneous diseases | Male   | 28-364 days | 95+ years | Global     | 1         | 2     | Cumulative Cigarettes (10 Years)               | --              |
| Skin and subcutaneous diseases | Male   | 28-364 days | 95+ years | Global     | 1         | 2     | Cumulative Cigarettes (5 Years)                | --              |
| Skin and subcutaneous diseases | Male   | 28-364 days | 95+ years | Global     | 1         | 2     | Smoking Prevalence                             | --              |
| Skin and subcutaneous diseases | Male   | 28-364 days | 95+ years | Global     | -1        | 3     | Education (years per capita)                   | --              |
| Skin and subcutaneous diseases | Male   | 28-364 days | 95+ years | Global     | -1        | 3     | LDI (IS per capita)                            | --              |
| Skin and subcutaneous diseases | Male   | 28-364 days | 95+ years | Global     | 0         | 3     | Socio-demographic Index                        | 593             |
| Bacterial skin diseases        | Female | 0-6 days    | 95+ years | Data Rich  | -1        | 1     | Improved Water Source (proportion with access) | --              |
| Bacterial skin diseases        | Female | 0-6 days    | 95+ years | Data Rich  | 1         | 1     | SEV unsafe sanitation                          | --              |
| Bacterial skin diseases        | Female | 0-6 days    | 95+ years | Data Rich  | -1        | 2     | Healthcare access and quality index            | --              |
| Bacterial skin diseases        | Female | 0-6 days    | 95+ years | Data Rich  | 1         | 2     | Alcohol (liters per capita)                    | 1000            |
| Bacterial skin diseases        | Female | 0-6 days    | 95+ years | Data Rich  | 1         | 2     | Cumulative Cigarettes (10 Years)               | --              |
| Bacterial skin diseases        | Female | 0-6 days    | 95+ years | Data Rich  | 1         | 2     | Cumulative Cigarettes (5 Years)                | --              |
| Bacterial skin diseases        | Female | 0-6 days    | 95+ years | Data Rich  | 1         | 2     | Smoking Prevalence                             | --              |
| Bacterial skin diseases        | Female | 0-6 days    | 95+ years | Data Rich  | -1        | 3     | Education (years per capita)                   | --              |
| Bacterial skin diseases        | Female | 0-6 days    | 95+ years | Data Rich  | -1        | 3     | LDI (IS per capita)                            | --              |
| Bacterial skin diseases        | Female | 0-6 days    | 95+ years | Data Rich  | 0         | 3     | Socio-demographic Index                        | --              |
| Bacterial skin diseases        | Female | 0-6 days    | 95+ years | Global     | -1        | 1     | Improved Water Source (proportion with access) | --              |
| Bacterial skin diseases        | Female | 0-6 days    | 95+ years | Global     | 1         | 1     | SEV unsafe sanitation                          | 726             |
| Bacterial skin diseases        | Female | 0-6 days    | 95+ years | Global     | -1        | 2     | Healthcare access and quality index            | --              |
| Bacterial skin diseases        | Female | 0-6 days    | 95+ years | Global     | 1         | 2     | Alcohol (liters per capita)                    | 274             |
| Bacterial skin diseases        | Female | 0-6 days    | 95+ years | Global     | 1         | 2     | Cumulative Cigarettes (10 Years)               | --              |
| Bacterial skin diseases        | Female | 0-6 days    | 95+ years | Global     | 1         | 2     | Cumulative Cigarettes (5 Years)                | --              |
| Bacterial skin diseases        | Female | 0-6 days    | 95+ years | Global     | 1         | 2     | Smoking Prevalence                             | --              |
| Bacterial skin diseases        | Female | 0-6 days    | 95+ years | Global     | -1        | 3     | Education (years per capita)                   | --              |
| Bacterial skin diseases        | Female | 0-6 days    | 95+ years | Global     | -1        | 3     | LDI (IS per capita)                            | --              |
| Bacterial skin diseases        | Female | 0-6 days    | 95+ years | Global     | 0         | 3     | Socio-demographic Index                        | 398             |
| Bacterial skin diseases        | Male   | 0-6 days    | 95+ years | Data Rich  | -1        | 1     | Improved Water Source (proportion with access) | --              |
| Bacterial skin diseases        | Male   | 0-6 days    | 95+ years | Data Rich  | 1         | 1     | SEV unsafe sanitation                          | --              |
| Bacterial skin diseases        | Male   | 0-6 days    | 95+ years | Data Rich  | -1        | 2     | Healthcare access and quality index            | --              |
| Bacterial skin diseases        | Male   | 0-6 days    | 95+ years | Data Rich  | 1         | 2     | Alcohol (liters per capita)                    | 691             |
| Bacterial skin diseases        | Male   | 0-6 days    | 95+ years | Data Rich  | 1         | 2     | Cumulative Cigarettes (10 Years)               | --              |
| Bacterial skin diseases        | Male   | 0-6 days    | 95+ years | Data Rich  | 1         | 2     | Cumulative Cigarettes (5 Years)                | --              |
| Bacterial skin diseases        | Male   | 0-6 days    | 95+ years | Data Rich  | 1         | 2     | Smoking Prevalence                             | --              |
| Bacterial skin diseases        | Male   | 0-6 days    | 95+ years | Data Rich  | -1        | 3     | Education (years per capita)                   | --              |
| Bacterial skin diseases        | Male   | 0-6 days    | 95+ years | Data Rich  | -1        | 3     | LDI (IS per capita)                            | --              |
| Bacterial skin diseases        | Male   | 0-6 days    | 95+ years | Data Rich  | 0         | 3     | Socio-demographic Index                        | 593             |
| Bacterial skin diseases        | Male   | 0-6 days    | 95+ years | Global     | -1        | 1     | Improved Water Source (proportion with access) | --              |
| Bacterial skin diseases        | Male   | 0-6 days    | 95+ years | Global     | 1         | 1     | SEV unsafe sanitation                          | 1000            |
| Bacterial skin diseases        | Male   | 0-6 days    | 95+ years | Global     | -1        | 2     | Healthcare access and quality index            | --              |
| Bacterial skin diseases        | Male   | 0-6 days    | 95+ years | Global     | 1         | 2     | Alcohol (liters per capita)                    | 491             |
| Bacterial skin diseases        | Male   | 0-6 days    | 95+ years | Global     | 1         | 2     | Cumulative Cigarettes (10 Years)               | --              |
| Bacterial skin diseases        | Male   | 0-6 days    | 95+ years | Global     | 1         | 2     | Cumulative Cigarettes (5 Years)                | --              |
| Bacterial skin diseases        | Male   | 0-6 days    | 95+ years | Global     | 1         | 2     | Smoking Prevalence                             | --              |
| Bacterial skin diseases        | Male   | 0-6 days    | 95+ years | Global     | -1        | 3     | Education (years per capita)                   | --              |
| Bacterial skin diseases        | Male   | 0-6 days    | 95+ years | Global     | -1        | 3     | LDI (IS per capita)                            | --              |
| Bacterial skin diseases        | Male   | 0-6 days    | 95+ years | Global     | 0         | 3     | Socio-demographic Index                        | --              |
| Cellulitis                     | Female | 28-364 days | 95+ years | Data Rich  | -1        | 2     | Healthcare access and quality index            | --              |
| Cellulitis                     | Female | 28-364 days | 95+ years | Data Rich  | 0         | 3     | Education (years per capita)                   | --              |
| Cellulitis                     | Female | 28-364 days | 95+ years | Data Rich  | 0         | 3     | LDI (IS per capita)                            | --              |
| Cellulitis                     | Female | 28-364 days | 95+ years | Global     | -1        | 2     | Healthcare access and quality index            | --              |
| Cellulitis                     | Female | 28-364 days | 95+ years | Global     | 0         | 3     | Education (years per capita)                   | 546             |
| Cellulitis                     | Female | 28-364 days | 95+ years | Global     | 0         | 3     | LDI (IS per capita)                            | --              |
| Cellulitis                     | Male   | 28-364 days | 95+ years | Data Rich  | -1        | 2     | Healthcare access and quality index            | --              |
| Cellulitis                     | Male   | 28-364 days | 95+ years | Data Rich  | 0         | 3     | Education (years per capita)                   | 546             |
| Cellulitis                     | Male   | 28-364 days | 95+ years | Data Rich  | 0         | 3     | LDI (IS per capita)                            | --              |
| Cellulitis                     | Male   | 28-364 days | 95+ years | Global     | -1        | 2     | Healthcare access and quality index            | --              |
| Cellulitis                     | Male   | 28-364 days | 95+ years | Global     | 0         | 3     | Education (years per capita)                   | 454             |
| Cellulitis                     | Male   | 28-364 days | 95+ years | Global     | 0         | 3     | LDI (IS per capita)                            | --              |
| Pyoderma                       | Female | 0-6 days    | 95+ years | Data Rich  | -1        | 1     | Improved Water Source (proportion with access) | --              |
| Pyoderma                       | Female | 0-6 days    | 95+ years | Data Rich  | 1         | 1     | SEV unsafe sanitation                          | 1000            |
| Pyoderma                       | Female | 0-6 days    | 95+ years | Data Rich  | -1        | 2     | Healthcare access and quality index            | --              |
| Pyoderma                       | Female | 0-6 days    | 95+ years | Data Rich  | 1         | 2     | Alcohol (liters per capita)                    | --              |
| Pyoderma                       | Female | 0-6 days    | 95+ years | Data Rich  | 1         | 2     | Cumulative Cigarettes (10 Years)               | --              |
| Pyoderma                       | Female | 0-6 days    | 95+ years | Data Rich  | 1         | 2     | Cumulative Cigarettes (5 Years)                | --              |
| Pyoderma                       | Female | 0-6 days    | 95+ years | Data Rich  | 1         | 2     | Smoking Prevalence                             | --              |
| Pyoderma                       | Female | 0-6 days    | 95+ years | Data Rich  | -1        | 3     | Education (years per capita)                   | --              |
| Pyoderma                       | Female | 0-6 days    | 95+ years | Data Rich  | -1        | 3     | LDI (IS per capita)                            | --              |

**Appendix Table 9: CODEm covariates used, level of covariate, and expected direction of covariate by cause, sex, and age**

*Covariates that CODEm did not select during the covariate selection process have no draw counts listed.*

| Cause           | Sex    | Age Start | Age End   | Model Type | Direction | Level | Covariate Name                                 | Number of Draws |
|-----------------|--------|-----------|-----------|------------|-----------|-------|------------------------------------------------|-----------------|
| Pyoderma        | Female | 0-6 days  | 95+ years | Data Rich  | 0         | 3     | Socio-demographic Index                        | 546             |
| Pyoderma        | Female | 0-6 days  | 95+ years | Global     | -1        | 1     | Improved Water Source (proportion with access) | --              |
| Pyoderma        | Female | 0-6 days  | 95+ years | Global     | 1         | 1     | SEV unsafe sanitation                          | 1000            |
| Pyoderma        | Female | 0-6 days  | 95+ years | Global     | -1        | 2     | Healthcare access and quality index            | --              |
| Pyoderma        | Female | 0-6 days  | 95+ years | Global     | 1         | 2     | Alcohol (liters per capita)                    | --              |
| Pyoderma        | Female | 0-6 days  | 95+ years | Global     | 1         | 2     | Cumulative Cigarettes (10 Years)               | --              |
| Pyoderma        | Female | 0-6 days  | 95+ years | Global     | 1         | 2     | Cumulative Cigarettes (5 Years)                | --              |
| Pyoderma        | Female | 0-6 days  | 95+ years | Global     | 1         | 2     | Smoking Prevalence                             | --              |
| Pyoderma        | Female | 0-6 days  | 95+ years | Global     | -1        | 3     | Education (years per capita)                   | --              |
| Pyoderma        | Female | 0-6 days  | 95+ years | Global     | -1        | 3     | LDI (I\$ per capita)                           | --              |
| Pyoderma        | Female | 0-6 days  | 95+ years | Global     | 0         | 3     | Socio-demographic Index                        | 546             |
| Pyoderma        | Male   | 0-6 days  | 95+ years | Data Rich  | -1        | 1     | Improved Water Source (proportion with access) | --              |
| Pyoderma        | Male   | 0-6 days  | 95+ years | Data Rich  | 1         | 1     | SEV unsafe sanitation                          | --              |
| Pyoderma        | Male   | 0-6 days  | 95+ years | Data Rich  | -1        | 2     | Healthcare access and quality index            | --              |
| Pyoderma        | Male   | 0-6 days  | 95+ years | Data Rich  | 1         | 2     | Alcohol (liters per capita)                    | --              |
| Pyoderma        | Male   | 0-6 days  | 95+ years | Data Rich  | 1         | 2     | Cumulative Cigarettes (10 Years)               | --              |
| Pyoderma        | Male   | 0-6 days  | 95+ years | Data Rich  | 1         | 2     | Cumulative Cigarettes (5 Years)                | --              |
| Pyoderma        | Male   | 0-6 days  | 95+ years | Data Rich  | 1         | 2     | Smoking Prevalence                             | --              |
| Pyoderma        | Male   | 0-6 days  | 95+ years | Data Rich  | -1        | 3     | Education (years per capita)                   | --              |
| Pyoderma        | Male   | 0-6 days  | 95+ years | Data Rich  | -1        | 3     | LDI (I\$ per capita)                           | --              |
| Pyoderma        | Male   | 0-6 days  | 95+ years | Data Rich  | 0         | 3     | Socio-demographic Index                        | 1000            |
| Pyoderma        | Male   | 0-6 days  | 95+ years | Global     | -1        | 1     | Improved Water Source (proportion with access) | --              |
| Pyoderma        | Male   | 0-6 days  | 95+ years | Global     | 1         | 1     | SEV unsafe sanitation                          | 1000            |
| Pyoderma        | Male   | 0-6 days  | 95+ years | Global     | -1        | 2     | Healthcare access and quality index            | --              |
| Pyoderma        | Male   | 0-6 days  | 95+ years | Global     | 1         | 2     | Alcohol (liters per capita)                    | --              |
| Pyoderma        | Male   | 0-6 days  | 95+ years | Global     | 1         | 2     | Cumulative Cigarettes (10 Years)               | --              |
| Pyoderma        | Male   | 0-6 days  | 95+ years | Global     | 1         | 2     | Cumulative Cigarettes (5 Years)                | --              |
| Pyoderma        | Male   | 0-6 days  | 95+ years | Global     | 1         | 2     | Smoking Prevalence                             | --              |
| Pyoderma        | Male   | 0-6 days  | 95+ years | Global     | -1        | 3     | Education (years per capita)                   | --              |
| Pyoderma        | Male   | 0-6 days  | 95+ years | Global     | -1        | 3     | LDI (I\$ per capita)                           | --              |
| Pyoderma        | Male   | 0-6 days  | 95+ years | Global     | 0         | 3     | Socio-demographic Index                        | --              |
| Decubitus ulcer | Female | 1-4 years | 95+ years | Data Rich  | -1        | 1     | Improved Water Source (proportion with access) | --              |
| Decubitus ulcer | Female | 1-4 years | 95+ years | Data Rich  | 1         | 1     | Diabetes Fasting Plasma Glucose (mmol/L)       | --              |
| Decubitus ulcer | Female | 1-4 years | 95+ years | Data Rich  | 1         | 1     | Prevalence of obesity                          | --              |
| Decubitus ulcer | Female | 1-4 years | 95+ years | Data Rich  | -1        | 2     | Healthcare access and quality index            | --              |
| Decubitus ulcer | Female | 1-4 years | 95+ years | Data Rich  | 1         | 2     | Smoking Prevalence                             | 105             |
| Decubitus ulcer | Female | 1-4 years | 95+ years | Data Rich  | 1         | 2     | Cumulative Cigarettes (10 Years)               | 128             |
| Decubitus ulcer | Female | 1-4 years | 95+ years | Data Rich  | 1         | 2     | Alcohol (liters per capita)                    | 498             |
| Decubitus ulcer | Female | 1-4 years | 95+ years | Data Rich  | 1         | 2     | Cumulative Cigarettes (5 Years)                | 584             |
| Decubitus ulcer | Female | 1-4 years | 95+ years | Data Rich  | -1        | 3     | Health System Access 2 (unitless)              | 113             |
| Decubitus ulcer | Female | 1-4 years | 95+ years | Data Rich  | -1        | 3     | Education (years per capita)                   | 334             |
| Decubitus ulcer | Female | 1-4 years | 95+ years | Data Rich  | -1        | 3     | LDI (I\$ per capita)                           | --              |
| Decubitus ulcer | Female | 1-4 years | 95+ years | Data Rich  | 0         | 3     | Socio-demographic Index                        | 189             |
| Decubitus ulcer | Female | 1-4 years | 95+ years | Data Rich  | 1         | 3     | SEV unsafe sanitation                          | 42              |
| Decubitus ulcer | Female | 1-4 years | 95+ years | Global     | -1        | 1     | Improved Water Source (proportion with access) | 194             |
| Decubitus ulcer | Female | 1-4 years | 95+ years | Global     | 1         | 1     | Diabetes Fasting Plasma Glucose (mmol/L)       | 194             |
| Decubitus ulcer | Female | 1-4 years | 95+ years | Global     | 1         | 1     | Prevalence of obesity                          | --              |
| Decubitus ulcer | Female | 1-4 years | 95+ years | Global     | -1        | 2     | Healthcare access and quality index            | --              |
| Decubitus ulcer | Female | 1-4 years | 95+ years | Global     | 1         | 2     | Cumulative Cigarettes (5 Years)                | 170             |
| Decubitus ulcer | Female | 1-4 years | 95+ years | Global     | 1         | 2     | Cumulative Cigarettes (10 Years)               | 557             |
| Decubitus ulcer | Female | 1-4 years | 95+ years | Global     | 1         | 2     | Alcohol (liters per capita)                    | 727             |
| Decubitus ulcer | Female | 1-4 years | 95+ years | Global     | 1         | 2     | Smoking Prevalence                             | --              |
| Decubitus ulcer | Female | 1-4 years | 95+ years | Global     | -1        | 3     | Education (years per capita)                   | 279             |
| Decubitus ulcer | Female | 1-4 years | 95+ years | Global     | -1        | 3     | Health System Access 2 (unitless)              | 361             |
| Decubitus ulcer | Female | 1-4 years | 95+ years | Global     | -1        | 3     | LDI (I\$ per capita)                           | --              |
| Decubitus ulcer | Female | 1-4 years | 95+ years | Global     | 0         | 3     | Socio-demographic Index                        | 375             |
| Decubitus ulcer | Female | 1-4 years | 95+ years | Global     | 1         | 3     | SEV unsafe sanitation                          | 104             |
| Decubitus ulcer | Male   | 1-4 years | 95+ years | Data Rich  | -1        | 1     | Improved Water Source (proportion with access) | 572             |
| Decubitus ulcer | Male   | 1-4 years | 95+ years | Data Rich  | 1         | 1     | Diabetes Fasting Plasma Glucose (mmol/L)       | 572             |
| Decubitus ulcer | Male   | 1-4 years | 95+ years | Data Rich  | 1         | 1     | Prevalence of obesity                          | --              |
| Decubitus ulcer | Male   | 1-4 years | 95+ years | Data Rich  | -1        | 2     | Healthcare access and quality index            | --              |
| Decubitus ulcer | Male   | 1-4 years | 95+ years | Data Rich  | 1         | 2     | Cumulative Cigarettes (5 Years)                | 428             |
| Decubitus ulcer | Male   | 1-4 years | 95+ years | Data Rich  | 1         | 2     | Alcohol (liters per capita)                    | --              |
| Decubitus ulcer | Male   | 1-4 years | 95+ years | Data Rich  | 1         | 2     | Cumulative Cigarettes (10 Years)               | --              |
| Decubitus ulcer | Male   | 1-4 years | 95+ years | Data Rich  | 1         | 2     | Smoking Prevalence                             | --              |
| Decubitus ulcer | Male   | 1-4 years | 95+ years | Data Rich  | -1        | 3     | Health System Access 2 (unitless)              | 428             |
| Decubitus ulcer | Male   | 1-4 years | 95+ years | Data Rich  | -1        | 3     | Education (years per capita)                   | --              |
| Decubitus ulcer | Male   | 1-4 years | 95+ years | Data Rich  | -1        | 3     | LDI (I\$ per capita)                           | --              |
| Decubitus ulcer | Male   | 1-4 years | 95+ years | Data Rich  | 0         | 3     | Socio-demographic Index                        | --              |
| Decubitus ulcer | Male   | 1-4 years | 95+ years | Data Rich  | 1         | 3     | SEV unsafe sanitation                          | 325             |
| Decubitus ulcer | Male   | 1-4 years | 95+ years | Global     | -1        | 1     | Improved Water Source (proportion with access) | 249             |
| Decubitus ulcer | Male   | 1-4 years | 95+ years | Global     | 1         | 1     | Diabetes Fasting Plasma Glucose (mmol/L)       | 970             |
| Decubitus ulcer | Male   | 1-4 years | 95+ years | Global     | 1         | 1     | Prevalence of obesity                          | --              |
| Decubitus ulcer | Male   | 1-4 years | 95+ years | Global     | -1        | 2     | Healthcare access and quality index            | 563             |
| Decubitus ulcer | Male   | 1-4 years | 95+ years | Global     | 1         | 2     | Cumulative Cigarettes (10 Years)               | 121             |
| Decubitus ulcer | Male   | 1-4 years | 95+ years | Global     | 1         | 2     | Smoking Prevalence                             | 176             |
| Decubitus ulcer | Male   | 1-4 years | 95+ years | Global     | 1         | 2     | Alcohol (liters per capita)                    | 383             |
| Decubitus ulcer | Male   | 1-4 years | 95+ years | Global     | 1         | 2     | Cumulative Cigarettes (5 Years)                | 529             |

**Appendix Table 9: CODEm covariates used, level of covariate, and expected direction of covariate by cause, sex, and age**

*Covariates that CODEm did not select during the covariate selection process have no draw counts listed.*

| Cause                                | Sex    | Age Start   | Age End   | Model Type | Direction | Level | Covariate Name                                                       | Number of Draws |
|--------------------------------------|--------|-------------|-----------|------------|-----------|-------|----------------------------------------------------------------------|-----------------|
| Decubitus ulcer                      | Male   | 1-4 years   | 95+ years | Global     | -1        | 3     | Health System Access 2 (unitless)                                    | 32              |
| Decubitus ulcer                      | Male   | 1-4 years   | 95+ years | Global     | -1        | 3     | Education (years per capita)                                         | 300             |
| Decubitus ulcer                      | Male   | 1-4 years   | 95+ years | Global     | -1        | 3     | LDI (IS per capita)                                                  | --              |
| Decubitus ulcer                      | Male   | 1-4 years   | 95+ years | Global     | 0         | 3     | Socio-demographic Index                                              | 177             |
| Decubitus ulcer                      | Male   | 1-4 years   | 95+ years | Global     | 1         | 3     | SEV unsafe sanitation                                                | 132             |
| Other skin and subcutaneous diseases | Female | 28-364 days | 95+ years | Data Rich  | -1        | 1     | Improved Water Source (proportion with access)                       | --              |
| Other skin and subcutaneous diseases | Female | 28-364 days | 95+ years | Data Rich  | 1         | 1     | SEV unsafe sanitation                                                | 1000            |
| Other skin and subcutaneous diseases | Female | 28-364 days | 95+ years | Data Rich  | 1         | 1     | Age-standardized underweight (weight-for-age) SEV                    | --              |
| Other skin and subcutaneous diseases | Female | 28-364 days | 95+ years | Data Rich  | -1        | 2     | Healthcare access and quality index                                  | --              |
| Other skin and subcutaneous diseases | Female | 28-364 days | 95+ years | Data Rich  | 1         | 2     | Alcohol (liters per capita)                                          | --              |
| Other skin and subcutaneous diseases | Female | 28-364 days | 95+ years | Data Rich  | 1         | 2     | Cumulative Cigarettes (10 Years)                                     | --              |
| Other skin and subcutaneous diseases | Female | 28-364 days | 95+ years | Data Rich  | 1         | 2     | Cumulative Cigarettes (5 Years)                                      | --              |
| Other skin and subcutaneous diseases | Female | 28-364 days | 95+ years | Data Rich  | 1         | 2     | Smoking Prevalence                                                   | --              |
| Other skin and subcutaneous diseases | Female | 28-364 days | 95+ years | Data Rich  | -1        | 3     | Education (years per capita)                                         | --              |
| Other skin and subcutaneous diseases | Female | 28-364 days | 95+ years | Data Rich  | -1        | 3     | Health System Access 2 (unitless)                                    | --              |
| Other skin and subcutaneous diseases | Female | 28-364 days | 95+ years | Data Rich  | -1        | 3     | LDI (IS per capita)                                                  | --              |
| Other skin and subcutaneous diseases | Female | 28-364 days | 95+ years | Data Rich  | 0         | 3     | Socio-demographic Index                                              | --              |
| Other skin and subcutaneous diseases | Female | 28-364 days | 95+ years | Global     | -1        | 1     | Improved Water Source (proportion with access)                       | 1000            |
| Other skin and subcutaneous diseases | Female | 28-364 days | 95+ years | Global     | 1         | 1     | Age-standardized underweight (weight-for-age) SEV                    | --              |
| Other skin and subcutaneous diseases | Female | 28-364 days | 95+ years | Global     | 1         | 1     | SEV unsafe sanitation                                                | --              |
| Other skin and subcutaneous diseases | Female | 28-364 days | 95+ years | Global     | -1        | 2     | Healthcare access and quality index                                  | --              |
| Other skin and subcutaneous diseases | Female | 28-364 days | 95+ years | Global     | 1         | 2     | Cumulative Cigarettes (5 Years)                                      | 407             |
| Other skin and subcutaneous diseases | Female | 28-364 days | 95+ years | Global     | 1         | 2     | Cumulative Cigarettes (10 Years)                                     | 414             |
| Other skin and subcutaneous diseases | Female | 28-364 days | 95+ years | Global     | 1         | 2     | Alcohol (liters per capita)                                          | --              |
| Other skin and subcutaneous diseases | Female | 28-364 days | 95+ years | Global     | 1         | 2     | Smoking Prevalence                                                   | --              |
| Other skin and subcutaneous diseases | Female | 28-364 days | 95+ years | Global     | -1        | 3     | Health System Access 2 (unitless)                                    | 275             |
| Other skin and subcutaneous diseases | Female | 28-364 days | 95+ years | Global     | -1        | 3     | Education (years per capita)                                         | --              |
| Other skin and subcutaneous diseases | Female | 28-364 days | 95+ years | Global     | -1        | 3     | LDI (IS per capita)                                                  | --              |
| Other skin and subcutaneous diseases | Female | 28-364 days | 95+ years | Global     | 0         | 3     | Socio-demographic Index                                              | --              |
| Other skin and subcutaneous diseases | Male   | 28-364 days | 95+ years | Data Rich  | -1        | 1     | Improved Water Source (proportion with access)                       | 1000            |
| Other skin and subcutaneous diseases | Male   | 28-364 days | 95+ years | Data Rich  | 1         | 1     | Age-standardized underweight (weight-for-age) SEV                    | --              |
| Other skin and subcutaneous diseases | Male   | 28-364 days | 95+ years | Data Rich  | 1         | 1     | SEV unsafe sanitation                                                | --              |
| Other skin and subcutaneous diseases | Male   | 28-364 days | 95+ years | Data Rich  | -1        | 2     | Healthcare access and quality index                                  | --              |
| Other skin and subcutaneous diseases | Male   | 28-364 days | 95+ years | Data Rich  | 1         | 2     | Cumulative Cigarettes (10 Years)                                     | 275             |
| Other skin and subcutaneous diseases | Male   | 28-364 days | 95+ years | Data Rich  | 1         | 2     | Alcohol (liters per capita)                                          | --              |
| Other skin and subcutaneous diseases | Male   | 28-364 days | 95+ years | Data Rich  | 1         | 2     | Smoking Prevalence                                                   | --              |
| Other skin and subcutaneous diseases | Male   | 28-364 days | 95+ years | Data Rich  | -1        | 3     | Health System Access 2 (unitless)                                    | 171             |
| Other skin and subcutaneous diseases | Male   | 28-364 days | 95+ years | Data Rich  | -1        | 3     | Education (years per capita)                                         | --              |
| Other skin and subcutaneous diseases | Male   | 28-364 days | 95+ years | Data Rich  | -1        | 3     | LDI (IS per capita)                                                  | --              |
| Other skin and subcutaneous diseases | Male   | 28-364 days | 95+ years | Data Rich  | 0         | 3     | Socio-demographic Index                                              | 361             |
| Other skin and subcutaneous diseases | Male   | 28-364 days | 95+ years | Global     | -1        | 1     | Improved Water Source (proportion with access)                       | 570             |
| Other skin and subcutaneous diseases | Male   | 28-364 days | 95+ years | Global     | 1         | 1     | SEV unsafe sanitation                                                | 430             |
| Other skin and subcutaneous diseases | Male   | 28-364 days | 95+ years | Global     | 1         | 1     | Age-standardized underweight (weight-for-age) SEV                    | --              |
| Other skin and subcutaneous diseases | Male   | 28-364 days | 95+ years | Global     | -1        | 2     | Healthcare access and quality index                                  | 82              |
| Other skin and subcutaneous diseases | Male   | 28-364 days | 95+ years | Global     | 1         | 2     | Cumulative Cigarettes (5 Years)                                      | 256             |
| Other skin and subcutaneous diseases | Male   | 28-364 days | 95+ years | Global     | 1         | 2     | Smoking Prevalence                                                   | 337             |
| Other skin and subcutaneous diseases | Male   | 28-364 days | 95+ years | Global     | 1         | 2     | Alcohol (liters per capita)                                          | --              |
| Other skin and subcutaneous diseases | Male   | 28-364 days | 95+ years | Global     | 1         | 2     | Cumulative Cigarettes (10 Years)                                     | --              |
| Other skin and subcutaneous diseases | Male   | 28-364 days | 95+ years | Global     | -1        | 3     | Education (years per capita)                                         | 28              |
| Other skin and subcutaneous diseases | Male   | 28-364 days | 95+ years | Global     | -1        | 3     | Health System Access 2 (unitless)                                    | 226             |
| Other skin and subcutaneous diseases | Male   | 28-364 days | 95+ years | Global     | -1        | 3     | LDI (IS per capita)                                                  | --              |
| Other skin and subcutaneous diseases | Male   | 28-364 days | 95+ years | Global     | 0         | 3     | Socio-demographic Index                                              | 46              |
| Musculoskeletal disorders            | Female | 5-9 years   | 95+ years | Data Rich  | 1         | 1     | Mean BMI                                                             | --              |
| Musculoskeletal disorders            | Female | 5-9 years   | 95+ years | Data Rich  | -1        | 2     | Healthcare access and quality index                                  | --              |
| Musculoskeletal disorders            | Female | 5-9 years   | 95+ years | Data Rich  | 0         | 2     | Education (years per capita)                                         | --              |
| Musculoskeletal disorders            | Female | 5-9 years   | 95+ years | Data Rich  | 0         | 2     | LDI (IS per capita)                                                  | --              |
| Musculoskeletal disorders            | Female | 5-9 years   | 95+ years | Data Rich  | 0         | 2     | vegetables adjusted(g)                                               | --              |
| Musculoskeletal disorders            | Female | 5-9 years   | 95+ years | Data Rich  | 1         | 2     | Age-standardized bone mineral density among population age 60+ years | --              |
| Musculoskeletal disorders            | Female | 5-9 years   | 95+ years | Data Rich  | 1         | 2     | Alcohol (liters per capita)                                          | --              |
| Musculoskeletal disorders            | Female | 5-9 years   | 95+ years | Data Rich  | 1         | 2     | Cholesterol (total, mean per capita)                                 | --              |
| Musculoskeletal disorders            | Female | 5-9 years   | 95+ years | Data Rich  | 1         | 2     | Cumulative Cigarettes (10 Years)                                     | --              |
| Musculoskeletal disorders            | Female | 5-9 years   | 95+ years | Data Rich  | 1         | 2     | Cumulative Cigarettes (5 Years)                                      | --              |
| Musculoskeletal disorders            | Female | 5-9 years   | 95+ years | Data Rich  | 1         | 2     | Low bone mineral density                                             | --              |
| Musculoskeletal disorders            | Female | 5-9 years   | 95+ years | Data Rich  | 1         | 2     | Smoking Prevalence                                                   | --              |
| Musculoskeletal disorders            | Female | 5-9 years   | 95+ years | Data Rich  | 0         | 3     | Socio-demographic Index                                              | --              |
| Musculoskeletal disorders            | Female | 5-9 years   | 95+ years | Global     | 1         | 1     | Mean BMI                                                             | 282             |
| Musculoskeletal disorders            | Female | 5-9 years   | 95+ years | Global     | -1        | 2     | Healthcare access and quality index                                  | --              |
| Musculoskeletal disorders            | Female | 5-9 years   | 95+ years | Global     | 0         | 2     | vegetables adjusted(g)                                               | 344             |
| Musculoskeletal disorders            | Female | 5-9 years   | 95+ years | Global     | 0         | 2     | Education (years per capita)                                         | 362             |
| Musculoskeletal disorders            | Female | 5-9 years   | 95+ years | Global     | 0         | 2     | LDI (IS per capita)                                                  | --              |
| Musculoskeletal disorders            | Female | 5-9 years   | 95+ years | Global     | 1         | 2     | Smoking Prevalence                                                   | 52              |
| Musculoskeletal disorders            | Female | 5-9 years   | 95+ years | Global     | 1         | 2     | Cumulative Cigarettes (5 Years)                                      | 66              |
| Musculoskeletal disorders            | Female | 5-9 years   | 95+ years | Global     | 1         | 2     | Cumulative Cigarettes (10 Years)                                     | 79              |
| Musculoskeletal disorders            | Female | 5-9 years   | 95+ years | Global     | 1         | 2     | Alcohol (liters per capita)                                          | 95              |
| Musculoskeletal disorders            | Female | 5-9 years   | 95+ years | Global     | 1         | 2     | Low bone mineral density                                             | 623             |
| Musculoskeletal disorders            | Female | 5-9 years   | 95+ years | Global     | 1         | 2     | Age-standardized bone mineral density among population age 60+ years | --              |

**Appendix Table 9: CODEm covariates used, level of covariate, and expected direction of covariate by cause, sex, and age**

*Covariates that CODEm did not select during the covariate selection process have no draw counts listed.*

| Cause                           | Sex    | Age Start | Age End   | Model Type | Direction | Level | Covariate Name                                                       | Number of Draws |
|---------------------------------|--------|-----------|-----------|------------|-----------|-------|----------------------------------------------------------------------|-----------------|
| Musculoskeletal disorders       | Female | 5-9 years | 95+ years | Global     | 1         | 2     | Cholesterol (total, mean per capita)                                 | --              |
| Musculoskeletal disorders       | Female | 5-9 years | 95+ years | Global     | 0         | 3     | Socio-demographic Index                                              | 246             |
| Musculoskeletal disorders       | Male   | 5-9 years | 95+ years | Data Rich  | 1         | 1     | Mean BMI                                                             | 678             |
| Musculoskeletal disorders       | Male   | 5-9 years | 95+ years | Data Rich  | -1        | 2     | Healthcare access and quality index                                  | 285             |
| Musculoskeletal disorders       | Male   | 5-9 years | 95+ years | Data Rich  | 0         | 2     | Education (years per capita)                                         | 545             |
| Musculoskeletal disorders       | Male   | 5-9 years | 95+ years | Data Rich  | 0         | 2     | vegetables adjusted(g)                                               | 593             |
| Musculoskeletal disorders       | Male   | 5-9 years | 95+ years | Data Rich  | 0         | 2     | LDI (I\$ per capita)                                                 | --              |
| Musculoskeletal disorders       | Male   | 5-9 years | 95+ years | Data Rich  | 1         | 2     | Cumulative Cigarettes (10 Years)                                     | 9               |
| Musculoskeletal disorders       | Male   | 5-9 years | 95+ years | Data Rich  | 1         | 2     | Smoking Prevalence                                                   | 9               |
| Musculoskeletal disorders       | Male   | 5-9 years | 95+ years | Data Rich  | 1         | 2     | Cumulative Cigarettes (5 Years)                                      | 12              |
| Musculoskeletal disorders       | Male   | 5-9 years | 95+ years | Data Rich  | 1         | 2     | Low bone mineral density                                             | 359             |
| Musculoskeletal disorders       | Male   | 5-9 years | 95+ years | Data Rich  | 1         | 2     | Alcohol (liters per capita)                                          | 613             |
| Musculoskeletal disorders       | Male   | 5-9 years | 95+ years | Data Rich  | 1         | 2     | Age-standardized bone mineral density among population age 60+ years | --              |
| Musculoskeletal disorders       | Male   | 5-9 years | 95+ years | Data Rich  | 1         | 2     | Cholesterol (total, mean per capita)                                 | --              |
| Musculoskeletal disorders       | Male   | 5-9 years | 95+ years | Data Rich  | 0         | 3     | Socio-demographic Index                                              | 487             |
| Musculoskeletal disorders       | Male   | 5-9 years | 95+ years | Global     | 1         | 1     | Mean BMI                                                             | 605             |
| Musculoskeletal disorders       | Male   | 5-9 years | 95+ years | Global     | -1        | 2     | Healthcare access and quality index                                  | 144             |
| Musculoskeletal disorders       | Male   | 5-9 years | 95+ years | Global     | 0         | 2     | vegetables adjusted(g)                                               | 309             |
| Musculoskeletal disorders       | Male   | 5-9 years | 95+ years | Global     | 0         | 2     | Education (years per capita)                                         | 625             |
| Musculoskeletal disorders       | Male   | 5-9 years | 95+ years | Global     | 0         | 2     | LDI (I\$ per capita)                                                 | --              |
| Musculoskeletal disorders       | Male   | 5-9 years | 95+ years | Global     | 1         | 2     | Smoking Prevalence                                                   | 66              |
| Musculoskeletal disorders       | Male   | 5-9 years | 95+ years | Global     | 1         | 2     | Cumulative Cigarettes (10 Years)                                     | 99              |
| Musculoskeletal disorders       | Male   | 5-9 years | 95+ years | Global     | 1         | 2     | Alcohol (liters per capita)                                          | 309             |
| Musculoskeletal disorders       | Male   | 5-9 years | 95+ years | Global     | 1         | 2     | Cholesterol (total, mean per capita)                                 | --              |
| Musculoskeletal disorders       | Male   | 5-9 years | 95+ years | Global     | 1         | 2     | Cumulative Cigarettes (5 Years)                                      | --              |
| Musculoskeletal disorders       | Male   | 5-9 years | 95+ years | Global     | 0         | 3     | Socio-demographic Index                                              | 491             |
| Rheumatoid arthritis            | Female | 5-9 years | 95+ years | Data Rich  | -1        | 1     | Healthcare access and quality index                                  | 329             |
| Rheumatoid arthritis            | Female | 5-9 years | 95+ years | Data Rich  | 1         | 1     | Smoking Prevalence                                                   | 118             |
| Rheumatoid arthritis            | Female | 5-9 years | 95+ years | Data Rich  | 1         | 1     | Alcohol (liters per capita)                                          | 137             |
| Rheumatoid arthritis            | Female | 5-9 years | 95+ years | Data Rich  | 1         | 1     | Cumulative Cigarettes (10 Years)                                     | 149             |
| Rheumatoid arthritis            | Female | 5-9 years | 95+ years | Data Rich  | 1         | 1     | Cumulative Cigarettes (5 Years)                                      | 839             |
| Rheumatoid arthritis            | Female | 5-9 years | 95+ years | Data Rich  | 1         | 2     | Cholesterol (total, mean per capita)                                 | 12              |
| Rheumatoid arthritis            | Female | 5-9 years | 95+ years | Data Rich  | 1         | 2     | Mean BMI                                                             | 603             |
| Rheumatoid arthritis            | Female | 5-9 years | 95+ years | Data Rich  | -1        | 3     | Education (years per capita)                                         | 47              |
| Rheumatoid arthritis            | Female | 5-9 years | 95+ years | Data Rich  | -1        | 3     | LDI (I\$ per capita)                                                 | --              |
| Rheumatoid arthritis            | Female | 5-9 years | 95+ years | Data Rich  | 0         | 3     | milk adjusted(g)                                                     | 61              |
| Rheumatoid arthritis            | Female | 5-9 years | 95+ years | Data Rich  | 0         | 3     | Socio-demographic Index                                              | 361             |
| Rheumatoid arthritis            | Female | 5-9 years | 95+ years | Global     | -1        | 1     | Healthcare access and quality index                                  | 309             |
| Rheumatoid arthritis            | Female | 5-9 years | 95+ years | Global     | 1         | 1     | Smoking Prevalence                                                   | 36              |
| Rheumatoid arthritis            | Female | 5-9 years | 95+ years | Global     | 1         | 1     | Cumulative Cigarettes (5 Years)                                      | 258             |
| Rheumatoid arthritis            | Female | 5-9 years | 95+ years | Global     | 1         | 1     | Cumulative Cigarettes (10 Years)                                     | 563             |
| Rheumatoid arthritis            | Female | 5-9 years | 95+ years | Global     | 1         | 1     | Alcohol (liters per capita)                                          | --              |
| Rheumatoid arthritis            | Female | 5-9 years | 95+ years | Global     | 1         | 2     | Cholesterol (total, mean per capita)                                 | 11              |
| Rheumatoid arthritis            | Female | 5-9 years | 95+ years | Global     | 1         | 2     | Mean BMI                                                             | 51              |
| Rheumatoid arthritis            | Female | 5-9 years | 95+ years | Global     | -1        | 3     | Education (years per capita)                                         | 13              |
| Rheumatoid arthritis            | Female | 5-9 years | 95+ years | Global     | -1        | 3     | LDI (I\$ per capita)                                                 | --              |
| Rheumatoid arthritis            | Female | 5-9 years | 95+ years | Global     | 0         | 3     | Socio-demographic Index                                              | 36              |
| Rheumatoid arthritis            | Female | 5-9 years | 95+ years | Global     | 0         | 3     | milk adjusted(g)                                                     | 205             |
| Rheumatoid arthritis            | Male   | 5-9 years | 95+ years | Data Rich  | -1        | 1     | Healthcare access and quality index                                  | 260             |
| Rheumatoid arthritis            | Male   | 5-9 years | 95+ years | Data Rich  | 1         | 1     | Smoking Prevalence                                                   | 36              |
| Rheumatoid arthritis            | Male   | 5-9 years | 95+ years | Data Rich  | 1         | 1     | Cumulative Cigarettes (10 Years)                                     | 149             |
| Rheumatoid arthritis            | Male   | 5-9 years | 95+ years | Data Rich  | 1         | 1     | Cumulative Cigarettes (5 Years)                                      | 704             |
| Rheumatoid arthritis            | Male   | 5-9 years | 95+ years | Data Rich  | 1         | 1     | Alcohol (liters per capita)                                          | --              |
| Rheumatoid arthritis            | Male   | 5-9 years | 95+ years | Data Rich  | 1         | 2     | Mean BMI                                                             | 642             |
| Rheumatoid arthritis            | Male   | 5-9 years | 95+ years | Data Rich  | 1         | 2     | Cholesterol (total, mean per capita)                                 | --              |
| Rheumatoid arthritis            | Male   | 5-9 years | 95+ years | Data Rich  | -1        | 3     | Education (years per capita)                                         | --              |
| Rheumatoid arthritis            | Male   | 5-9 years | 95+ years | Data Rich  | -1        | 3     | LDI (I\$ per capita)                                                 | --              |
| Rheumatoid arthritis            | Male   | 5-9 years | 95+ years | Data Rich  | 0         | 3     | milk adjusted(g)                                                     | 311             |
| Rheumatoid arthritis            | Male   | 5-9 years | 95+ years | Data Rich  | 0         | 3     | Socio-demographic Index                                              | 516             |
| Rheumatoid arthritis            | Male   | 5-9 years | 95+ years | Global     | -1        | 1     | Healthcare access and quality index                                  | 444             |
| Rheumatoid arthritis            | Male   | 5-9 years | 95+ years | Global     | 1         | 1     | Smoking Prevalence                                                   | 50              |
| Rheumatoid arthritis            | Male   | 5-9 years | 95+ years | Global     | 1         | 1     | Cumulative Cigarettes (5 Years)                                      | 379             |
| Rheumatoid arthritis            | Male   | 5-9 years | 95+ years | Global     | 1         | 1     | Cumulative Cigarettes (10 Years)                                     | 415             |
| Rheumatoid arthritis            | Male   | 5-9 years | 95+ years | Global     | 1         | 1     | Alcohol (liters per capita)                                          | --              |
| Rheumatoid arthritis            | Male   | 5-9 years | 95+ years | Global     | 1         | 2     | Cholesterol (total, mean per capita)                                 | --              |
| Rheumatoid arthritis            | Male   | 5-9 years | 95+ years | Global     | 1         | 2     | Mean BMI                                                             | --              |
| Rheumatoid arthritis            | Male   | 5-9 years | 95+ years | Global     | -1        | 3     | Education (years per capita)                                         | 224             |
| Rheumatoid arthritis            | Male   | 5-9 years | 95+ years | Global     | -1        | 3     | LDI (I\$ per capita)                                                 | --              |
| Rheumatoid arthritis            | Male   | 5-9 years | 95+ years | Global     | 0         | 3     | Socio-demographic Index                                              | 13              |
| Rheumatoid arthritis            | Male   | 5-9 years | 95+ years | Global     | 0         | 3     | milk adjusted(g)                                                     | 134             |
| Other musculoskeletal disorders | Female | 5-9 years | 95+ years | Data Rich  | 1         | 1     | Mean BMI                                                             | 508             |
| Other musculoskeletal disorders | Female | 5-9 years | 95+ years | Data Rich  | -1        | 2     | Healthcare access and quality index                                  | --              |
| Other musculoskeletal disorders | Female | 5-9 years | 95+ years | Data Rich  | 0         | 2     | vegetables adjusted(g)                                               | 352             |
| Other musculoskeletal disorders | Female | 5-9 years | 95+ years | Data Rich  | 0         | 2     | Education (years per capita)                                         | 683             |
| Other musculoskeletal disorders | Female | 5-9 years | 95+ years | Data Rich  | 0         | 2     | LDI (I\$ per capita)                                                 | --              |
| Other musculoskeletal disorders | Female | 5-9 years | 95+ years | Data Rich  | 1         | 2     | Alcohol (liters per capita)                                          | 95              |
| Other musculoskeletal disorders | Female | 5-9 years | 95+ years | Data Rich  | 1         | 2     | Cumulative Cigarettes (5 Years)                                      | 179             |



**Appendix Table 9: CODEm covariates used, level of covariate, and expected direction of covariate by cause, sex, and age**

*Covariates that CODEm did not select during the covariate selection process have no draw counts listed.*

| Cause                           | Sex    | Age Start | Age End     | Model Type | Direction | Level | Covariate Name                                             | Number of Draws |
|---------------------------------|--------|-----------|-------------|------------|-----------|-------|------------------------------------------------------------|-----------------|
| Other musculoskeletal disorders | Female | 5-9 years | 95+ years   | Data Rich  | 1         | 2     | Cumulative Cigarettes (10 Years)                           | 239             |
| Other musculoskeletal disorders | Female | 5-9 years | 95+ years   | Data Rich  | 1         | 2     | Cholesterol (total, mean per capita)                       | --              |
| Other musculoskeletal disorders | Female | 5-9 years | 95+ years   | Data Rich  | 1         | 2     | Smoking Prevalence                                         | --              |
| Other musculoskeletal disorders | Female | 5-9 years | 95+ years   | Data Rich  | 0         | 3     | Socio-demographic Index                                    | 341             |
| Other musculoskeletal disorders | Female | 5-9 years | 95+ years   | Global     | 1         | 1     | Mean BMI                                                   | 359             |
| Other musculoskeletal disorders | Female | 5-9 years | 95+ years   | Global     | -1        | 2     | Healthcare access and quality index                        | --              |
| Other musculoskeletal disorders | Female | 5-9 years | 95+ years   | Global     | 0         | 2     | vegetables adjusted(g)                                     | 253             |
| Other musculoskeletal disorders | Female | 5-9 years | 95+ years   | Global     | 0         | 2     | Education (years per capita)                               | 572             |
| Other musculoskeletal disorders | Female | 5-9 years | 95+ years   | Global     | 0         | 2     | LDI (US per capita)                                        | --              |
| Other musculoskeletal disorders | Female | 5-9 years | 95+ years   | Global     | 1         | 2     | Alcohol (liters per capita)                                | 47              |
| Other musculoskeletal disorders | Female | 5-9 years | 95+ years   | Global     | 1         | 2     | Cumulative Cigarettes (5 Years)                            | 85              |
| Other musculoskeletal disorders | Female | 5-9 years | 95+ years   | Global     | 1         | 2     | Cumulative Cigarettes (10 Years)                           | 102             |
| Other musculoskeletal disorders | Female | 5-9 years | 95+ years   | Global     | 1         | 2     | Cholesterol (total, mean per capita)                       | --              |
| Other musculoskeletal disorders | Female | 5-9 years | 95+ years   | Global     | 1         | 2     | Smoking Prevalence                                         | --              |
| Other musculoskeletal disorders | Female | 5-9 years | 95+ years   | Global     | 0         | 3     | Socio-demographic Index                                    | 470             |
| Other musculoskeletal disorders | Male   | 5-9 years | 95+ years   | Data Rich  | 1         | 1     | Mean BMI                                                   | 141             |
| Other musculoskeletal disorders | Male   | 5-9 years | 95+ years   | Data Rich  | -1        | 2     | Healthcare access and quality index                        | --              |
| Other musculoskeletal disorders | Male   | 5-9 years | 95+ years   | Data Rich  | 0         | 2     | vegetables adjusted(g)                                     | 378             |
| Other musculoskeletal disorders | Male   | 5-9 years | 95+ years   | Data Rich  | 0         | 2     | Education (years per capita)                               | 496             |
| Other musculoskeletal disorders | Male   | 5-9 years | 95+ years   | Data Rich  | 0         | 2     | LDI (US per capita)                                        | --              |
| Other musculoskeletal disorders | Male   | 5-9 years | 95+ years   | Data Rich  | 1         | 2     | Alcohol (liters per capita)                                | 580             |
| Other musculoskeletal disorders | Male   | 5-9 years | 95+ years   | Data Rich  | 1         | 2     | Cholesterol (total, mean per capita)                       | --              |
| Other musculoskeletal disorders | Male   | 5-9 years | 95+ years   | Data Rich  | 1         | 2     | Cumulative Cigarettes (10 Years)                           | --              |
| Other musculoskeletal disorders | Male   | 5-9 years | 95+ years   | Data Rich  | 1         | 2     | Cumulative Cigarettes (5 Years)                            | --              |
| Other musculoskeletal disorders | Male   | 5-9 years | 95+ years   | Data Rich  | 1         | 2     | Smoking Prevalence                                         | --              |
| Other musculoskeletal disorders | Male   | 5-9 years | 95+ years   | Data Rich  | 0         | 3     | Socio-demographic Index                                    | 618             |
| Other musculoskeletal disorders | Male   | 5-9 years | 95+ years   | Global     | 1         | 1     | Mean BMI                                                   | --              |
| Other musculoskeletal disorders | Male   | 5-9 years | 95+ years   | Global     | -1        | 2     | Healthcare access and quality index                        | --              |
| Other musculoskeletal disorders | Male   | 5-9 years | 95+ years   | Global     | 0         | 2     | Education (years per capita)                               | 264             |
| Other musculoskeletal disorders | Male   | 5-9 years | 95+ years   | Global     | 0         | 2     | vegetables adjusted(g)                                     | 381             |
| Other musculoskeletal disorders | Male   | 5-9 years | 95+ years   | Global     | 0         | 2     | LDI (US per capita)                                        | --              |
| Other musculoskeletal disorders | Male   | 5-9 years | 95+ years   | Global     | 1         | 2     | Alcohol (liters per capita)                                | 264             |
| Other musculoskeletal disorders | Male   | 5-9 years | 95+ years   | Global     | 1         | 2     | Cholesterol (total, mean per capita)                       | --              |
| Other musculoskeletal disorders | Male   | 5-9 years | 95+ years   | Global     | 1         | 2     | Cumulative Cigarettes (10 Years)                           | --              |
| Other musculoskeletal disorders | Male   | 5-9 years | 95+ years   | Global     | 1         | 2     | Cumulative Cigarettes (5 Years)                            | --              |
| Other musculoskeletal disorders | Male   | 5-9 years | 95+ years   | Global     | 1         | 2     | Smoking Prevalence                                         | --              |
| Other musculoskeletal disorders | Male   | 5-9 years | 95+ years   | Global     | 1         | 2     | Socio-demographic Index                                    | 707             |
| Congenital anomalies            | Female | 0-6 days  | 65-69 years | Data Rich  | -1        | 1     | Composite fortification standard and folic acid inclusion  | 86              |
| Congenital anomalies            | Female | 0-6 days  | 65-69 years | Data Rich  | -1        | 1     | Folic acid unadjusted (ug)                                 | 743             |
| Congenital anomalies            | Female | 0-6 days  | 65-69 years | Data Rich  | -1        | 1     | In-Facility Delivery (proportion)                          | --              |
| Congenital anomalies            | Female | 0-6 days  | 65-69 years | Data Rich  | 1         | 1     | Live Births 35+ (proportion)                               | 460             |
| Congenital anomalies            | Female | 0-6 days  | 65-69 years | Data Rich  | 1         | 1     | Birth prevalence of congenital chromosomal anomalies       | 584             |
| Congenital anomalies            | Female | 0-6 days  | 65-69 years | Data Rich  | 1         | 1     | Birth prevalence of CHD                                    | --              |
| Congenital anomalies            | Female | 0-6 days  | 65-69 years | Data Rich  | 1         | 1     | Maternal alcohol consumption during pregnancy (proportion) | --              |
| Congenital anomalies            | Female | 0-6 days  | 65-69 years | Data Rich  | -1        | 2     | Antenatal Care (4 visits) Coverage (proportion)            | 68              |
| Congenital anomalies            | Female | 0-6 days  | 65-69 years | Data Rich  | -1        | 2     | Healthcare access and quality index                        | --              |
| Congenital anomalies            | Female | 0-6 days  | 65-69 years | Data Rich  | -1        | 2     | Legality of Abortion                                       | --              |
| Congenital anomalies            | Female | 0-6 days  | 65-69 years | Data Rich  | 0         | 2     | Antenatal Care (1 visit) Coverage (proportion)             | 495             |
| Congenital anomalies            | Female | 0-6 days  | 65-69 years | Data Rich  | 1         | 2     | Smoking Prevalence (Reproductive Age Standardized)         | 10              |
| Congenital anomalies            | Female | 0-6 days  | 65-69 years | Data Rich  | -1        | 3     | Socio-demographic Index                                    | 11              |
| Congenital anomalies            | Female | 0-6 days  | 65-69 years | Data Rich  | -1        | 3     | Maternal Education (years per capita)                      | 23              |
| Congenital anomalies            | Female | 0-6 days  | 65-69 years | Data Rich  | 1         | 3     | Outdoor Air Pollution (PM2.5)                              | 21              |
| Congenital anomalies            | Female | 0-6 days  | 65-69 years | Data Rich  | 1         | 3     | Alcohol (liters per capita)                                | 92              |
| Congenital anomalies            | Female | 0-6 days  | 65-69 years | Data Rich  | 1         | 3     | fruits unadjusted(g)                                       | 151             |
| Congenital anomalies            | Female | 0-6 days  | 65-69 years | Data Rich  | 1         | 3     | vegetables unadjusted(g)                                   | 319             |
| Congenital anomalies            | Female | 0-6 days  | 65-69 years | Data Rich  | 1         | 3     | Indoor Air Pollution (All Cooking Fuels)                   | --              |
| Congenital anomalies            | Female | 0-6 days  | 65-69 years | Global     | -1        | 1     | Composite fortification standard and folic acid inclusion  | 0               |
| Congenital anomalies            | Female | 0-6 days  | 65-69 years | Global     | -1        | 1     | In-Facility Delivery (proportion)                          | 0               |
| Congenital anomalies            | Female | 0-6 days  | 65-69 years | Global     | -1        | 1     | Folic acid unadjusted (ug)                                 | 855             |
| Congenital anomalies            | Female | 0-6 days  | 65-69 years | Global     | 1         | 1     | Birth prevalence of CHD                                    | 0               |
| Congenital anomalies            | Female | 0-6 days  | 65-69 years | Global     | 1         | 1     | Birth prevalence of congenital chromosomal anomalies       | 748             |
| Congenital anomalies            | Female | 0-6 days  | 65-69 years | Global     | 1         | 1     | Live Births 35+ (proportion)                               | 758             |
| Congenital anomalies            | Female | 0-6 days  | 65-69 years | Global     | 1         | 1     | Maternal alcohol consumption during pregnancy (proportion) | --              |
| Congenital anomalies            | Female | 0-6 days  | 65-69 years | Global     | -1        | 2     | Antenatal Care (4 visits) Coverage (proportion)            | 0               |
| Congenital anomalies            | Female | 0-6 days  | 65-69 years | Global     | -1        | 2     | Healthcare access and quality index                        | 0               |
| Congenital anomalies            | Female | 0-6 days  | 65-69 years | Global     | -1        | 2     | Legality of Abortion                                       | --              |
| Congenital anomalies            | Female | 0-6 days  | 65-69 years | Global     | 0         | 2     | Antenatal Care (1 visit) Coverage (proportion)             | 977             |
| Congenital anomalies            | Female | 0-6 days  | 65-69 years | Global     | 1         | 2     | Smoking Prevalence (Reproductive Age Standardized)         | 0               |
| Congenital anomalies            | Female | 0-6 days  | 65-69 years | Global     | -1        | 3     | Maternal Education (years per capita)                      | 0               |
| Congenital anomalies            | Female | 0-6 days  | 65-69 years | Global     | -1        | 3     | Socio-demographic Index                                    | 0               |
| Congenital anomalies            | Female | 0-6 days  | 65-69 years | Global     | 1         | 3     | Alcohol (liters per capita)                                | 0               |
| Congenital anomalies            | Female | 0-6 days  | 65-69 years | Global     | 1         | 3     | Indoor Air Pollution (All Cooking Fuels)                   | 0               |
| Congenital anomalies            | Female | 0-6 days  | 65-69 years | Global     | 1         | 3     | Outdoor Air Pollution (PM2.5)                              | 73              |
| Congenital anomalies            | Female | 0-6 days  | 65-69 years | Global     | 1         | 3     | vegetables unadjusted(g)                                   | 185             |
| Congenital anomalies            | Female | 0-6 days  | 65-69 years | Global     | 1         | 3     | fruits unadjusted(g)                                       | 268             |
| Congenital anomalies            | Male   | 0-6 days  | 65-69 years | Data Rich  | -1        | 1     | Composite fortification standard and folic acid inclusion  | 93              |
| Congenital anomalies            | Male   | 0-6 days  | 65-69 years | Data Rich  | -1        | 1     | Folic acid unadjusted (ug)                                 | 827             |
| Congenital anomalies            | Male   | 0-6 days  | 65-69 years | Data Rich  | -1        | 1     | In-Facility Delivery (proportion)                          | --              |

**Appendix Table 9: CODEm covariates used, level of covariate, and expected direction of covariate by cause, sex, and age**

*Covariates that CODEm did not select during the covariate selection process have no draw counts listed.*

| Cause                | Sex    | Age Start | Age End     | Model Type | Direction | Level | Covariate Name                                             | Number of Draws |
|----------------------|--------|-----------|-------------|------------|-----------|-------|------------------------------------------------------------|-----------------|
| Congenital anomalies | Male   | 0-6 days  | 65-69 years | Data Rich  | 1         | 1     | Birth prevalence of CHD                                    | 25              |
| Congenital anomalies | Male   | 0-6 days  | 65-69 years | Data Rich  | 1         | 1     | Birth prevalence of congenital chromosomal anomalies       | 402             |
| Congenital anomalies | Male   | 0-6 days  | 65-69 years | Data Rich  | 1         | 1     | Live Births 35+ (proportion)                               | 644             |
| Congenital anomalies | Male   | 0-6 days  | 65-69 years | Data Rich  | 1         | 1     | Maternal alcohol consumption during pregnancy (proportion) | --              |
| Congenital anomalies | Male   | 0-6 days  | 65-69 years | Data Rich  | -1        | 2     | Healthcare access and quality index                        | 21              |
| Congenital anomalies | Male   | 0-6 days  | 65-69 years | Data Rich  | -1        | 2     | Antenatal Care (4 visits) Coverage (proportion)            | 53              |
| Congenital anomalies | Male   | 0-6 days  | 65-69 years | Data Rich  | -1        | 2     | Legality of Abortion                                       | --              |
| Congenital anomalies | Male   | 0-6 days  | 65-69 years | Data Rich  | 0         | 2     | Antenatal Care (1 visit) Coverage (proportion)             | 624             |
| Congenital anomalies | Male   | 0-6 days  | 65-69 years | Data Rich  | 1         | 2     | Smoking Prevalence (Reproductive Age Standardized)         | 5               |
| Congenital anomalies | Male   | 0-6 days  | 65-69 years | Data Rich  | -1        | 3     | Socio-demographic Index                                    | 23              |
| Congenital anomalies | Male   | 0-6 days  | 65-69 years | Data Rich  | -1        | 3     | Maternal Education (years per capita)                      | 25              |
| Congenital anomalies | Male   | 0-6 days  | 65-69 years | Data Rich  | 1         | 3     | Outdoor Air Pollution (PM2.5)                              | 44              |
| Congenital anomalies | Male   | 0-6 days  | 65-69 years | Data Rich  | 1         | 3     | vegetables unadjusted(g)                                   | 236             |
| Congenital anomalies | Male   | 0-6 days  | 65-69 years | Data Rich  | 1         | 3     | fruits unadjusted(g)                                       | 286             |
| Congenital anomalies | Male   | 0-6 days  | 65-69 years | Data Rich  | 1         | 3     | Alcohol (liters per capita)                                | --              |
| Congenital anomalies | Male   | 0-6 days  | 65-69 years | Data Rich  | 1         | 3     | Indoor Air Pollution (All Cooking Fuels)                   | --              |
| Congenital anomalies | Male   | 0-6 days  | 65-69 years | Global     | -1        | 1     | Composite fortification standard and folic acid inclusion  | 0               |
| Congenital anomalies | Male   | 0-6 days  | 65-69 years | Global     | -1        | 1     | Folic acid unadjusted (ug)                                 | 524             |
| Congenital anomalies | Male   | 0-6 days  | 65-69 years | Global     | -1        | 1     | In-Facility Delivery (proportion)                          | --              |
| Congenital anomalies | Male   | 0-6 days  | 65-69 years | Global     | 1         | 1     | Birth prevalence of CHD                                    | 0               |
| Congenital anomalies | Male   | 0-6 days  | 65-69 years | Global     | 1         | 1     | Birth prevalence of congenital chromosomal anomalies       | 491             |
| Congenital anomalies | Male   | 0-6 days  | 65-69 years | Global     | 1         | 1     | Live Births 35+ (proportion)                               | 911             |
| Congenital anomalies | Male   | 0-6 days  | 65-69 years | Global     | 1         | 1     | Maternal alcohol consumption during pregnancy (proportion) | --              |
| Congenital anomalies | Male   | 0-6 days  | 65-69 years | Global     | -1        | 2     | Antenatal Care (4 visits) Coverage (proportion)            | 0               |
| Congenital anomalies | Male   | 0-6 days  | 65-69 years | Global     | -1        | 2     | Healthcare access and quality index                        | 0               |
| Congenital anomalies | Male   | 0-6 days  | 65-69 years | Global     | -1        | 2     | Legality of Abortion                                       | --              |
| Congenital anomalies | Male   | 0-6 days  | 65-69 years | Global     | 0         | 2     | Antenatal Care (1 visit) Coverage (proportion)             | 894             |
| Congenital anomalies | Male   | 0-6 days  | 65-69 years | Global     | 1         | 2     | Smoking Prevalence (Reproductive Age Standardized)         | 0               |
| Congenital anomalies | Male   | 0-6 days  | 65-69 years | Global     | -1        | 3     | Maternal Education (years per capita)                      | 0               |
| Congenital anomalies | Male   | 0-6 days  | 65-69 years | Global     | -1        | 3     | Socio-demographic Index                                    | 0               |
| Congenital anomalies | Male   | 0-6 days  | 65-69 years | Global     | 1         | 3     | Indoor Air Pollution (All Cooking Fuels)                   | 0               |
| Congenital anomalies | Male   | 0-6 days  | 65-69 years | Global     | 1         | 3     | vegetables unadjusted(g)                                   | 251             |
| Congenital anomalies | Male   | 0-6 days  | 65-69 years | Global     | 1         | 3     | Outdoor Air Pollution (PM2.5)                              | 317             |
| Congenital anomalies | Male   | 0-6 days  | 65-69 years | Global     | 1         | 3     | fruits unadjusted(g)                                       | 398             |
| Congenital anomalies | Male   | 0-6 days  | 65-69 years | Global     | 1         | 3     | Alcohol (liters per capita)                                | --              |
| Neural tube defects  | Female | 0-6 days  | 65-69 years | Data Rich  | -1        | 1     | In-Facility Delivery (proportion)                          | 29              |
| Neural tube defects  | Female | 0-6 days  | 65-69 years | Data Rich  | -1        | 1     | Socio-demographic Index                                    | 186             |
| Neural tube defects  | Female | 0-6 days  | 65-69 years | Data Rich  | -1        | 1     | Composite fortification standard and folic acid inclusion  | 573             |
| Neural tube defects  | Female | 0-6 days  | 65-69 years | Data Rich  | -1        | 1     | Folic acid unadjusted (ug)                                 | 848             |
| Neural tube defects  | Female | 0-6 days  | 65-69 years | Data Rich  | -1        | 2     | Antenatal Care (1 visit) Coverage (proportion)             | 10              |
| Neural tube defects  | Female | 0-6 days  | 65-69 years | Data Rich  | -1        | 2     | Healthcare access and quality index                        | 15              |
| Neural tube defects  | Female | 0-6 days  | 65-69 years | Data Rich  | -1        | 2     | Antenatal Care (4 visits) Coverage (proportion)            | 18              |
| Neural tube defects  | Female | 0-6 days  | 65-69 years | Data Rich  | -1        | 2     | vegetables unadjusted(g)                                   | 366             |
| Neural tube defects  | Female | 0-6 days  | 65-69 years | Data Rich  | -1        | 2     | Legality of Abortion                                       | 389             |
| Neural tube defects  | Female | 0-6 days  | 65-69 years | Data Rich  | 1         | 2     | Smoking Prevalence (Reproductive Age Standardized)         | 215             |
| Neural tube defects  | Female | 0-6 days  | 65-69 years | Data Rich  | -1        | 3     | Maternal Education (years per capita)                      | 80              |
| Neural tube defects  | Female | 0-6 days  | 65-69 years | Data Rich  | 0         | 3     | fruits unadjusted(g)                                       | 263             |
| Neural tube defects  | Female | 0-6 days  | 65-69 years | Data Rich  | 1         | 3     | Indoor Air Pollution (All Cooking Fuels)                   | 0               |
| Neural tube defects  | Female | 0-6 days  | 65-69 years | Data Rich  | 1         | 3     | Diabetes Age-Standardized Prevalence (proportion)          | 77              |
| Neural tube defects  | Female | 0-6 days  | 65-69 years | Data Rich  | 1         | 3     | Maternal alcohol consumption during pregnancy (proportion) | --              |
| Neural tube defects  | Female | 0-6 days  | 65-69 years | Global     | -1        | 1     | Socio-demographic Index                                    | 250             |
| Neural tube defects  | Female | 0-6 days  | 65-69 years | Global     | -1        | 1     | In-Facility Delivery (proportion)                          | 287             |
| Neural tube defects  | Female | 0-6 days  | 65-69 years | Global     | -1        | 1     | Folic acid unadjusted (ug)                                 | 479             |
| Neural tube defects  | Female | 0-6 days  | 65-69 years | Global     | -1        | 1     | Composite fortification standard and folic acid inclusion  | 712             |
| Neural tube defects  | Female | 0-6 days  | 65-69 years | Global     | -1        | 2     | Antenatal Care (1 visit) Coverage (proportion)             | 0               |
| Neural tube defects  | Female | 0-6 days  | 65-69 years | Global     | -1        | 2     | Antenatal Care (4 visits) Coverage (proportion)            | 0               |
| Neural tube defects  | Female | 0-6 days  | 65-69 years | Global     | -1        | 2     | Healthcare access and quality index                        | 13              |
| Neural tube defects  | Female | 0-6 days  | 65-69 years | Global     | -1        | 2     | Legality of Abortion                                       | 275             |
| Neural tube defects  | Female | 0-6 days  | 65-69 years | Global     | -1        | 2     | vegetables unadjusted(g)                                   | 324             |
| Neural tube defects  | Female | 0-6 days  | 65-69 years | Global     | 1         | 2     | Smoking Prevalence (Reproductive Age Standardized)         | 764             |
| Neural tube defects  | Female | 0-6 days  | 65-69 years | Global     | -1        | 3     | Maternal Education (years per capita)                      | 12              |
| Neural tube defects  | Female | 0-6 days  | 65-69 years | Global     | 0         | 3     | fruits unadjusted(g)                                       | 115             |
| Neural tube defects  | Female | 0-6 days  | 65-69 years | Global     | 1         | 3     | Indoor Air Pollution (All Cooking Fuels)                   | 11              |
| Neural tube defects  | Female | 0-6 days  | 65-69 years | Global     | 1         | 3     | Diabetes Age-Standardized Prevalence (proportion)          | 138             |
| Neural tube defects  | Female | 0-6 days  | 65-69 years | Global     | 1         | 3     | Maternal alcohol consumption during pregnancy (proportion) | --              |
| Neural tube defects  | Male   | 0-6 days  | 65-69 years | Data Rich  | -1        | 1     | In-Facility Delivery (proportion)                          | 0               |
| Neural tube defects  | Male   | 0-6 days  | 65-69 years | Data Rich  | -1        | 1     | Socio-demographic Index                                    | 193             |
| Neural tube defects  | Male   | 0-6 days  | 65-69 years | Data Rich  | -1        | 1     | Composite fortification standard and folic acid inclusion  | 587             |
| Neural tube defects  | Male   | 0-6 days  | 65-69 years | Data Rich  | -1        | 1     | Folic acid unadjusted (ug)                                 | 687             |
| Neural tube defects  | Male   | 0-6 days  | 65-69 years | Data Rich  | -1        | 2     | Antenatal Care (1 visit) Coverage (proportion)             | 0               |
| Neural tube defects  | Male   | 0-6 days  | 65-69 years | Data Rich  | -1        | 2     | Healthcare access and quality index                        | 23              |
| Neural tube defects  | Male   | 0-6 days  | 65-69 years | Data Rich  | -1        | 2     | Antenatal Care (4 visits) Coverage (proportion)            | 53              |
| Neural tube defects  | Male   | 0-6 days  | 65-69 years | Data Rich  | -1        | 2     | vegetables unadjusted(g)                                   | 65              |
| Neural tube defects  | Male   | 0-6 days  | 65-69 years | Data Rich  | -1        | 2     | Legality of Abortion                                       | 161             |
| Neural tube defects  | Male   | 0-6 days  | 65-69 years | Data Rich  | 1         | 2     | Smoking Prevalence (Reproductive Age Standardized)         | 373             |
| Neural tube defects  | Male   | 0-6 days  | 65-69 years | Data Rich  | -1        | 3     | Maternal Education (years per capita)                      | 165             |
| Neural tube defects  | Male   | 0-6 days  | 65-69 years | Data Rich  | 0         | 3     | fruits unadjusted(g)                                       | 18              |
| Neural tube defects  | Male   | 0-6 days  | 65-69 years | Data Rich  | 1         | 3     | Indoor Air Pollution (All Cooking Fuels)                   | 0               |



**Appendix Table 9: CODEm covariates used, level of covariate, and expected direction of covariate by cause, sex, and age**

*Covariates that CODEm did not select during the covariate selection process have no draw counts listed.*

| Cause                      | Sex    | Age Start | Age End     | Model Type | Direction | Level | Covariate Name                                             | Number of Draws |
|----------------------------|--------|-----------|-------------|------------|-----------|-------|------------------------------------------------------------|-----------------|
| Neural tube defects        | Male   | 0-6 days  | 65-69 years | Data Rich  | 1         | 3     | Maternal alcohol consumption during pregnancy (proportion) | 41              |
| Neural tube defects        | Male   | 0-6 days  | 65-69 years | Data Rich  | 1         | 3     | Diabetes Age-Standardized Prevalence (proportion)          | 82              |
| Neural tube defects        | Male   | 0-6 days  | 65-69 years | Global     | -1        | 1     | Folic acid unadjusted (ug)                                 | 18              |
| Neural tube defects        | Male   | 0-6 days  | 65-69 years | Global     | -1        | 1     | Composite fortification standard and folic acid inclusion  | 397             |
| Neural tube defects        | Male   | 0-6 days  | 65-69 years | Global     | -1        | 1     | In-Facility Delivery (proportion)                          | 647             |
| Neural tube defects        | Male   | 0-6 days  | 65-69 years | Global     | -1        | 1     | Socio-demographic Index                                    | 797             |
| Neural tube defects        | Male   | 0-6 days  | 65-69 years | Global     | -1        | 2     | Antenatal Care (1 visit) Coverage (proportion)             | 4               |
| Neural tube defects        | Male   | 0-6 days  | 65-69 years | Global     | -1        | 2     | vegetables unadjusted(g)                                   | 23              |
| Neural tube defects        | Male   | 0-6 days  | 65-69 years | Global     | -1        | 2     | Antenatal Care (4 visits) Coverage (proportion)            | 43              |
| Neural tube defects        | Male   | 0-6 days  | 65-69 years | Global     | -1        | 2     | Healthcare access and quality index                        | 157             |
| Neural tube defects        | Male   | 0-6 days  | 65-69 years | Global     | -1        | 2     | Legality of Abortion                                       | 187             |
| Neural tube defects        | Male   | 0-6 days  | 65-69 years | Global     | 1         | 2     | Smoking Prevalence (Reproductive Age Standardized)         | 337             |
| Neural tube defects        | Male   | 0-6 days  | 65-69 years | Global     | -1        | 3     | Maternal Education (years per capita)                      | 204             |
| Neural tube defects        | Male   | 0-6 days  | 65-69 years | Global     | 0         | 3     | fruits unadjusted(g)                                       | 49              |
| Neural tube defects        | Male   | 0-6 days  | 65-69 years | Global     | 1         | 3     | Diabetes Age-Standardized Prevalence (proportion)          | 10              |
| Neural tube defects        | Male   | 0-6 days  | 65-69 years | Global     | 1         | 3     | Indoor Air Pollution (All Cooking Fuels)                   | 491             |
| Neural tube defects        | Male   | 0-6 days  | 65-69 years | Global     | 1         | 3     | Maternal alcohol consumption during pregnancy (proportion) | --              |
| Congenital heart anomalies | Female | 0-6 days  | 65-69 years | Data Rich  | 1         | 1     | Birth prevalence of CHD                                    | --              |
| Congenital heart anomalies | Female | 0-6 days  | 65-69 years | Data Rich  | 1         | 1     | Maternal alcohol consumption during pregnancy (proportion) | --              |
| Congenital heart anomalies | Female | 0-6 days  | 65-69 years | Data Rich  | -1        | 2     | Healthcare access and quality index                        | 235             |
| Congenital heart anomalies | Female | 0-6 days  | 65-69 years | Data Rich  | -1        | 2     | Socio-demographic Index                                    | 235             |
| Congenital heart anomalies | Female | 0-6 days  | 65-69 years | Data Rich  | -1        | 2     | Antenatal Care (1 visit) Coverage (proportion)             | --              |
| Congenital heart anomalies | Female | 0-6 days  | 65-69 years | Data Rich  | -1        | 2     | In-Facility Delivery (proportion)                          | --              |
| Congenital heart anomalies | Female | 0-6 days  | 65-69 years | Data Rich  | -1        | 2     | Legality of Abortion                                       | --              |
| Congenital heart anomalies | Female | 0-6 days  | 65-69 years | Data Rich  | 1         | 2     | Smoking Prevalence (Reproductive Age Standardized)         | 367             |
| Congenital heart anomalies | Female | 0-6 days  | 65-69 years | Data Rich  | 1         | 2     | Diabetes Age-Standardized Prevalence (proportion)          | --              |
| Congenital heart anomalies | Female | 0-6 days  | 65-69 years | Data Rich  | -1        | 3     | Antenatal Care (4 visits) Coverage (proportion)            | 76              |
| Congenital heart anomalies | Female | 0-6 days  | 65-69 years | Data Rich  | -1        | 3     | Maternal Education (years per capita)                      | 101             |
| Congenital heart anomalies | Female | 0-6 days  | 65-69 years | Data Rich  | -1        | 3     | Skilled Birth Attendance (proportion)                      | --              |
| Congenital heart anomalies | Female | 0-6 days  | 65-69 years | Data Rich  | 1         | 3     | Alcohol (liters per capita)                                | 516             |
| Congenital heart anomalies | Female | 0-6 days  | 65-69 years | Data Rich  | 1         | 3     | Live Births 35+ (proportion)                               | --              |
| Congenital heart anomalies | Female | 0-6 days  | 65-69 years | Global     | 1         | 1     | Birth prevalence of CHD                                    | --              |
| Congenital heart anomalies | Female | 0-6 days  | 65-69 years | Global     | 1         | 1     | Maternal alcohol consumption during pregnancy (proportion) | --              |
| Congenital heart anomalies | Female | 0-6 days  | 65-69 years | Global     | -1        | 2     | Antenatal Care (1 visit) Coverage (proportion)             | 25              |
| Congenital heart anomalies | Female | 0-6 days  | 65-69 years | Global     | -1        | 2     | In-Facility Delivery (proportion)                          | 38              |
| Congenital heart anomalies | Female | 0-6 days  | 65-69 years | Global     | -1        | 2     | Healthcare access and quality index                        | 168             |
| Congenital heart anomalies | Female | 0-6 days  | 65-69 years | Global     | -1        | 2     | Socio-demographic Index                                    | 168             |
| Congenital heart anomalies | Female | 0-6 days  | 65-69 years | Global     | -1        | 2     | Legality of Abortion                                       | --              |
| Congenital heart anomalies | Female | 0-6 days  | 65-69 years | Global     | 1         | 2     | Diabetes Age-Standardized Prevalence (proportion)          | 435             |
| Congenital heart anomalies | Female | 0-6 days  | 65-69 years | Global     | 1         | 2     | Smoking Prevalence (Reproductive Age Standardized)         | 603             |
| Congenital heart anomalies | Female | 0-6 days  | 65-69 years | Global     | -1        | 3     | Antenatal Care (4 visits) Coverage (proportion)            | 32              |
| Congenital heart anomalies | Female | 0-6 days  | 65-69 years | Global     | -1        | 3     | Skilled Birth Attendance (proportion)                      | 33              |
| Congenital heart anomalies | Female | 0-6 days  | 65-69 years | Global     | -1        | 3     | Maternal Education (years per capita)                      | 101             |
| Congenital heart anomalies | Female | 0-6 days  | 65-69 years | Global     | 1         | 3     | Alcohol (liters per capita)                                | 494             |
| Congenital heart anomalies | Female | 0-6 days  | 65-69 years | Global     | 1         | 3     | Live Births 35+ (proportion)                               | --              |
| Congenital heart anomalies | Male   | 0-6 days  | 65-69 years | Data Rich  | 1         | 1     | Birth prevalence of CHD                                    | --              |
| Congenital heart anomalies | Male   | 0-6 days  | 65-69 years | Data Rich  | 1         | 1     | Maternal alcohol consumption during pregnancy (proportion) | --              |
| Congenital heart anomalies | Male   | 0-6 days  | 65-69 years | Data Rich  | -1        | 2     | Healthcare access and quality index                        | 329             |
| Congenital heart anomalies | Male   | 0-6 days  | 65-69 years | Data Rich  | -1        | 2     | Socio-demographic Index                                    | 372             |
| Congenital heart anomalies | Male   | 0-6 days  | 65-69 years | Data Rich  | -1        | 2     | Antenatal Care (1 visit) Coverage (proportion)             | --              |
| Congenital heart anomalies | Male   | 0-6 days  | 65-69 years | Data Rich  | -1        | 2     | In-Facility Delivery (proportion)                          | --              |
| Congenital heart anomalies | Male   | 0-6 days  | 65-69 years | Data Rich  | -1        | 2     | Legality of Abortion                                       | --              |
| Congenital heart anomalies | Male   | 0-6 days  | 65-69 years | Data Rich  | 1         | 2     | Smoking Prevalence (Reproductive Age Standardized)         | 782             |
| Congenital heart anomalies | Male   | 0-6 days  | 65-69 years | Data Rich  | 1         | 2     | Diabetes Age-Standardized Prevalence (proportion)          | --              |
| Congenital heart anomalies | Male   | 0-6 days  | 65-69 years | Data Rich  | -1        | 3     | Antenatal Care (4 visits) Coverage (proportion)            | 60              |
| Congenital heart anomalies | Male   | 0-6 days  | 65-69 years | Data Rich  | -1        | 3     | Maternal Education (years per capita)                      | 333             |
| Congenital heart anomalies | Male   | 0-6 days  | 65-69 years | Data Rich  | -1        | 3     | Skilled Birth Attendance (proportion)                      | --              |
| Congenital heart anomalies | Male   | 0-6 days  | 65-69 years | Data Rich  | 1         | 3     | Alcohol (liters per capita)                                | --              |
| Congenital heart anomalies | Male   | 0-6 days  | 65-69 years | Data Rich  | 1         | 3     | Live Births 35+ (proportion)                               | --              |
| Congenital heart anomalies | Male   | 0-6 days  | 65-69 years | Global     | 1         | 1     | Birth prevalence of CHD                                    | --              |
| Congenital heart anomalies | Male   | 0-6 days  | 65-69 years | Global     | 1         | 1     | Maternal alcohol consumption during pregnancy (proportion) | --              |
| Congenital heart anomalies | Male   | 0-6 days  | 65-69 years | Global     | -1        | 2     | Healthcare access and quality index                        | 237             |
| Congenital heart anomalies | Male   | 0-6 days  | 65-69 years | Global     | -1        | 2     | Socio-demographic Index                                    | 237             |
| Congenital heart anomalies | Male   | 0-6 days  | 65-69 years | Global     | -1        | 2     | Antenatal Care (1 visit) Coverage (proportion)             | --              |
| Congenital heart anomalies | Male   | 0-6 days  | 65-69 years | Global     | -1        | 2     | In-Facility Delivery (proportion)                          | --              |
| Congenital heart anomalies | Male   | 0-6 days  | 65-69 years | Global     | -1        | 2     | Legality of Abortion                                       | --              |
| Congenital heart anomalies | Male   | 0-6 days  | 65-69 years | Global     | 1         | 2     | Diabetes Age-Standardized Prevalence (proportion)          | 402             |
| Congenital heart anomalies | Male   | 0-6 days  | 65-69 years | Global     | 1         | 2     | Smoking Prevalence (Reproductive Age Standardized)         | 639             |
| Congenital heart anomalies | Male   | 0-6 days  | 65-69 years | Global     | -1        | 3     | Antenatal Care (4 visits) Coverage (proportion)            | 164             |
| Congenital heart anomalies | Male   | 0-6 days  | 65-69 years | Global     | -1        | 3     | Maternal Education (years per capita)                      | 197             |
| Congenital heart anomalies | Male   | 0-6 days  | 65-69 years | Global     | -1        | 3     | Skilled Birth Attendance (proportion)                      | --              |
| Congenital heart anomalies | Male   | 0-6 days  | 65-69 years | Global     | 1         | 3     | Alcohol (liters per capita)                                | --              |
| Congenital heart anomalies | Male   | 0-6 days  | 65-69 years | Global     | 1         | 3     | Live Births 35+ (proportion)                               | --              |
| Orofacial clefts           | Female | 0-6 days  | 1-4 years   | Data Rich  | -1        | 1     | Socio-demographic Index                                    | 574             |
| Orofacial clefts           | Female | 0-6 days  | 1-4 years   | Data Rich  | -1        | 1     | Composite fortification standard and folic acid inclusion  | 766             |
| Orofacial clefts           | Female | 0-6 days  | 1-4 years   | Data Rich  | 1         | 1     | Indoor Air Pollution (All Cooking Fuels)                   | 15              |
| Orofacial clefts           | Female | 0-6 days  | 1-4 years   | Data Rich  | -1        | 2     | Skilled Birth Attendance (proportion)                      | 0               |
| Orofacial clefts           | Female | 0-6 days  | 1-4 years   | Data Rich  | -1        | 2     | Healthcare access and quality index                        | 597             |

**Appendix Table 9: CODEm covariates used, level of covariate, and expected direction of covariate by cause, sex, and age**

*Covariates that CODEm did not select during the covariate selection process have no draw counts listed.*

| Cause            | Sex    | Age Start | Age End     | Model Type | Direction | Level | Covariate Name                                             | Number of Draws |
|------------------|--------|-----------|-------------|------------|-----------|-------|------------------------------------------------------------|-----------------|
| Orofacial clefts | Female | 0-6 days  | 1-4 years   | Data Rich  | -1        | 2     | Legality of Abortion                                       | --              |
| Orofacial clefts | Female | 0-6 days  | 1-4 years   | Data Rich  | 1         | 2     | Smoking Prevalence (Reproductive Age Standardized)         | 619             |
| Orofacial clefts | Female | 0-6 days  | 1-4 years   | Data Rich  | 1         | 2     | Diabetes Age-Standardized Prevalence (proportion)          | --              |
| Orofacial clefts | Female | 0-6 days  | 1-4 years   | Data Rich  | 1         | 2     | Maternal alcohol consumption during pregnancy (proportion) | --              |
| Orofacial clefts | Female | 0-6 days  | 1-4 years   | Data Rich  | -1        | 3     | Antenatal Care (4 visits) Coverage (proportion)            | 10              |
| Orofacial clefts | Female | 0-6 days  | 1-4 years   | Data Rich  | -1        | 3     | Maternal Education (years per capita)                      | 450             |
| Orofacial clefts | Female | 0-6 days  | 1-4 years   | Data Rich  | -1        | 3     | Antenatal Care (1 visit) Coverage (proportion)             | --              |
| Orofacial clefts | Female | 0-6 days  | 1-4 years   | Data Rich  | 0         | 3     | vegetables unadjusted(g)                                   | 386             |
| Orofacial clefts | Female | 0-6 days  | 1-4 years   | Data Rich  | 0         | 3     | fruits unadjusted(g)                                       | 583             |
| Orofacial clefts | Female | 0-6 days  | 1-4 years   | Data Rich  | 1         | 3     | Alcohol (liters per capita)                                | --              |
| Orofacial clefts | Female | 0-6 days  | 1-4 years   | Global     | -1        | 1     | Socio-demographic Index                                    | 533             |
| Orofacial clefts | Female | 0-6 days  | 1-4 years   | Global     | -1        | 1     | Composite fortification standard and folic acid inclusion  | 818             |
| Orofacial clefts | Female | 0-6 days  | 1-4 years   | Global     | -1        | 2     | Skilled Birth Attendance (proportion)                      | 2               |
| Orofacial clefts | Female | 0-6 days  | 1-4 years   | Global     | -1        | 2     | Healthcare access and quality index                        | 569             |
| Orofacial clefts | Female | 0-6 days  | 1-4 years   | Global     | -1        | 2     | Legality of Abortion                                       | --              |
| Orofacial clefts | Female | 0-6 days  | 1-4 years   | Global     | 1         | 2     | Smoking Prevalence (Reproductive Age Standardized)         | 569             |
| Orofacial clefts | Female | 0-6 days  | 1-4 years   | Global     | 1         | 2     | Diabetes Age-Standardized Prevalence (proportion)          | --              |
| Orofacial clefts | Female | 0-6 days  | 1-4 years   | Global     | 1         | 2     | Maternal alcohol consumption during pregnancy (proportion) | --              |
| Orofacial clefts | Female | 0-6 days  | 1-4 years   | Global     | -1        | 3     | Antenatal Care (4 visits) Coverage (proportion)            | 2               |
| Orofacial clefts | Female | 0-6 days  | 1-4 years   | Global     | -1        | 3     | Maternal Education (years per capita)                      | 498             |
| Orofacial clefts | Female | 0-6 days  | 1-4 years   | Global     | -1        | 3     | Antenatal Care (1 visit) Coverage (proportion)             | --              |
| Orofacial clefts | Female | 0-6 days  | 1-4 years   | Global     | 0         | 3     | fruits unadjusted(g)                                       | 543             |
| Orofacial clefts | Female | 0-6 days  | 1-4 years   | Global     | 0         | 3     | vegetables unadjusted(g)                                   | 663             |
| Orofacial clefts | Female | 0-6 days  | 1-4 years   | Global     | 1         | 3     | Indoor Air Pollution (All Cooking Fuels)                   | 2               |
| Orofacial clefts | Female | 0-6 days  | 1-4 years   | Global     | 1         | 3     | Alcohol (liters per capita)                                | --              |
| Orofacial clefts | Male   | 0-6 days  | 1-4 years   | Data Rich  | -1        | 1     | Composite fortification standard and folic acid inclusion  | 313             |
| Orofacial clefts | Male   | 0-6 days  | 1-4 years   | Data Rich  | -1        | 1     | Socio-demographic Index                                    | 535             |
| Orofacial clefts | Male   | 0-6 days  | 1-4 years   | Data Rich  | -1        | 1     | Folic acid unadjusted (ug)                                 | 950             |
| Orofacial clefts | Male   | 0-6 days  | 1-4 years   | Data Rich  | -1        | 2     | Legality of Abortion                                       | 0               |
| Orofacial clefts | Male   | 0-6 days  | 1-4 years   | Data Rich  | -1        | 2     | Skilled Birth Attendance (proportion)                      | 0               |
| Orofacial clefts | Male   | 0-6 days  | 1-4 years   | Data Rich  | -1        | 2     | Healthcare access and quality index                        | 79              |
| Orofacial clefts | Male   | 0-6 days  | 1-4 years   | Data Rich  | 1         | 2     | Diabetes Age-Standardized Prevalence (proportion)          | 0               |
| Orofacial clefts | Male   | 0-6 days  | 1-4 years   | Data Rich  | 1         | 2     | Smoking Prevalence (Reproductive Age Standardized)         | 215             |
| Orofacial clefts | Male   | 0-6 days  | 1-4 years   | Data Rich  | 1         | 2     | Maternal alcohol consumption during pregnancy (proportion) | --              |
| Orofacial clefts | Male   | 0-6 days  | 1-4 years   | Data Rich  | -1        | 3     | Antenatal Care (1 visit) Coverage (proportion)             | 0               |
| Orofacial clefts | Male   | 0-6 days  | 1-4 years   | Data Rich  | -1        | 3     | Antenatal Care (4 visits) Coverage (proportion)            | 2               |
| Orofacial clefts | Male   | 0-6 days  | 1-4 years   | Data Rich  | -1        | 3     | Maternal Education (years per capita)                      | 375             |
| Orofacial clefts | Male   | 0-6 days  | 1-4 years   | Data Rich  | 0         | 3     | fruits unadjusted(g)                                       | 391             |
| Orofacial clefts | Male   | 0-6 days  | 1-4 years   | Data Rich  | 0         | 3     | vegetables unadjusted(g)                                   | 627             |
| Orofacial clefts | Male   | 0-6 days  | 1-4 years   | Data Rich  | 1         | 3     | Indoor Air Pollution (All Cooking Fuels)                   | 2               |
| Orofacial clefts | Male   | 0-6 days  | 1-4 years   | Data Rich  | 1         | 3     | Alcohol (liters per capita)                                | --              |
| Orofacial clefts | Male   | 0-6 days  | 1-4 years   | Global     | -1        | 1     | Composite fortification standard and folic acid inclusion  | 495             |
| Orofacial clefts | Male   | 0-6 days  | 1-4 years   | Global     | -1        | 1     | Socio-demographic Index                                    | 521             |
| Orofacial clefts | Male   | 0-6 days  | 1-4 years   | Global     | -1        | 1     | Folic acid unadjusted (ug)                                 | 604             |
| Orofacial clefts | Male   | 0-6 days  | 1-4 years   | Global     | -1        | 2     | Skilled Birth Attendance (proportion)                      | 0               |
| Orofacial clefts | Male   | 0-6 days  | 1-4 years   | Global     | -1        | 2     | Healthcare access and quality index                        | 511             |
| Orofacial clefts | Male   | 0-6 days  | 1-4 years   | Global     | -1        | 2     | Legality of Abortion                                       | --              |
| Orofacial clefts | Male   | 0-6 days  | 1-4 years   | Global     | 1         | 2     | Diabetes Age-Standardized Prevalence (proportion)          | 223             |
| Orofacial clefts | Male   | 0-6 days  | 1-4 years   | Global     | 1         | 2     | Smoking Prevalence (Reproductive Age Standardized)         | 556             |
| Orofacial clefts | Male   | 0-6 days  | 1-4 years   | Global     | 1         | 2     | Maternal alcohol consumption during pregnancy (proportion) | --              |
| Orofacial clefts | Male   | 0-6 days  | 1-4 years   | Global     | -1        | 3     | Antenatal Care (1 visit) Coverage (proportion)             | 0               |
| Orofacial clefts | Male   | 0-6 days  | 1-4 years   | Global     | -1        | 3     | Antenatal Care (4 visits) Coverage (proportion)            | 4               |
| Orofacial clefts | Male   | 0-6 days  | 1-4 years   | Global     | -1        | 3     | Maternal Education (years per capita)                      | 64              |
| Orofacial clefts | Male   | 0-6 days  | 1-4 years   | Global     | 0         | 3     | fruits unadjusted(g)                                       | 631             |
| Orofacial clefts | Male   | 0-6 days  | 1-4 years   | Global     | 0         | 3     | vegetables unadjusted(g)                                   | 757             |
| Orofacial clefts | Male   | 0-6 days  | 1-4 years   | Global     | 1         | 3     | Indoor Air Pollution (All Cooking Fuels)                   | 0               |
| Orofacial clefts | Male   | 0-6 days  | 1-4 years   | Global     | 1         | 3     | Alcohol (liters per capita)                                | --              |
| Down's syndrome  | Female | 0-6 days  | 65-69 years | Data Rich  | -1        | 1     | Legality of Abortion                                       | --              |
| Down's syndrome  | Female | 0-6 days  | 65-69 years | Data Rich  | 1         | 1     | Live Births 40+ (proportion)                               | 269             |
| Down's syndrome  | Female | 0-6 days  | 65-69 years | Data Rich  | 1         | 1     | Live Births 35+ (proportion)                               | 752             |
| Down's syndrome  | Female | 0-6 days  | 65-69 years | Data Rich  | 1         | 1     | Birth prevalence of congenital chromosomal anomalies       | 902             |
| Down's syndrome  | Female | 0-6 days  | 65-69 years | Data Rich  | -1        | 2     | Healthcare access and quality index                        | --              |
| Down's syndrome  | Female | 0-6 days  | 65-69 years | Data Rich  | -1        | 2     | In-Facility Delivery (proportion)                          | --              |
| Down's syndrome  | Female | 0-6 days  | 65-69 years | Data Rich  | -1        | 2     | Socio-demographic Index                                    | --              |
| Down's syndrome  | Female | 0-6 days  | 65-69 years | Data Rich  | -1        | 3     | vegetables unadjusted(g)                                   | 249             |
| Down's syndrome  | Female | 0-6 days  | 65-69 years | Data Rich  | -1        | 3     | Antenatal Care (1 visit) Coverage (proportion)             | --              |
| Down's syndrome  | Female | 0-6 days  | 65-69 years | Data Rich  | -1        | 3     | Antenatal Care (4 visits) Coverage (proportion)            | --              |
| Down's syndrome  | Female | 0-6 days  | 65-69 years | Data Rich  | -1        | 3     | Maternal Education (years per capita)                      | --              |
| Down's syndrome  | Female | 0-6 days  | 65-69 years | Data Rich  | 1         | 3     | Indoor Air Pollution (All Cooking Fuels)                   | --              |
| Down's syndrome  | Female | 0-6 days  | 65-69 years | Data Rich  | 1         | 3     | Maternal alcohol consumption during pregnancy (proportion) | --              |
| Down's syndrome  | Female | 0-6 days  | 65-69 years | Data Rich  | 1         | 3     | Smoking Prevalence (Reproductive Age Standardized)         | --              |
| Down's syndrome  | Female | 0-6 days  | 65-69 years | Global     | -1        | 1     | Legality of Abortion                                       | --              |
| Down's syndrome  | Female | 0-6 days  | 65-69 years | Global     | 1         | 1     | Live Births 40+ (proportion)                               | 332             |
| Down's syndrome  | Female | 0-6 days  | 65-69 years | Global     | 1         | 1     | Live Births 35+ (proportion)                               | 758             |
| Down's syndrome  | Female | 0-6 days  | 65-69 years | Global     | 1         | 1     | Birth prevalence of congenital chromosomal anomalies       | 778             |
| Down's syndrome  | Female | 0-6 days  | 65-69 years | Global     | -1        | 2     | Healthcare access and quality index                        | --              |
| Down's syndrome  | Female | 0-6 days  | 65-69 years | Global     | -1        | 2     | In-Facility Delivery (proportion)                          | --              |
| Down's syndrome  | Female | 0-6 days  | 65-69 years | Global     | -1        | 2     | Socio-demographic Index                                    | --              |

**Appendix Table 9: CODEm covariates used, level of covariate, and expected direction of covariate by cause, sex, and age**

*Covariates that CODEm did not select during the covariate selection process have no draw counts listed.*

| Cause                           | Sex    | Age Start | Age End     | Model Type | Direction | Level | Covariate Name                                             | Number of Draws |
|---------------------------------|--------|-----------|-------------|------------|-----------|-------|------------------------------------------------------------|-----------------|
| Down's syndrome                 | Female | 0-6 days  | 65-69 years | Global     | -1        | 3     | vegetables unadjusted(g)                                   | 227             |
| Down's syndrome                 | Female | 0-6 days  | 65-69 years | Global     | -1        | 3     | Antenatal Care (1 visit) Coverage (proportion)             | --              |
| Down's syndrome                 | Female | 0-6 days  | 65-69 years | Global     | -1        | 3     | Antenatal Care (4 visits) Coverage (proportion)            | --              |
| Down's syndrome                 | Female | 0-6 days  | 65-69 years | Global     | -1        | 3     | Maternal Education (years per capita)                      | --              |
| Down's syndrome                 | Female | 0-6 days  | 65-69 years | Global     | 1         | 3     | Indoor Air Pollution (All Cooking Fuels)                   | --              |
| Down's syndrome                 | Female | 0-6 days  | 65-69 years | Global     | 1         | 3     | Maternal alcohol consumption during pregnancy (proportion) | --              |
| Down's syndrome                 | Female | 0-6 days  | 65-69 years | Global     | 1         | 3     | Smoking Prevalence (Reproductive Age Standardized)         | --              |
| Down's syndrome                 | Male   | 0-6 days  | 65-69 years | Data Rich  | -1        | 1     | Legality of Abortion                                       | --              |
| Down's syndrome                 | Male   | 0-6 days  | 65-69 years | Data Rich  | 1         | 1     | Live Births 40+ (proportion)                               | 432             |
| Down's syndrome                 | Male   | 0-6 days  | 65-69 years | Data Rich  | 1         | 1     | Birth prevalence of congenital chromosomal anomalies       | 756             |
| Down's syndrome                 | Male   | 0-6 days  | 65-69 years | Data Rich  | 1         | 1     | Live Births 35+ (proportion)                               | 793             |
| Down's syndrome                 | Male   | 0-6 days  | 65-69 years | Data Rich  | -1        | 2     | Healthcare access and quality index                        | --              |
| Down's syndrome                 | Male   | 0-6 days  | 65-69 years | Data Rich  | -1        | 2     | In-Facility Delivery (proportion)                          | --              |
| Down's syndrome                 | Male   | 0-6 days  | 65-69 years | Data Rich  | -1        | 2     | Socio-demographic Index                                    | --              |
| Down's syndrome                 | Male   | 0-6 days  | 65-69 years | Data Rich  | -1        | 3     | vegetables unadjusted(g)                                   | 292             |
| Down's syndrome                 | Male   | 0-6 days  | 65-69 years | Data Rich  | -1        | 3     | Antenatal Care (1 visit) Coverage (proportion)             | --              |
| Down's syndrome                 | Male   | 0-6 days  | 65-69 years | Data Rich  | -1        | 3     | Antenatal Care (4 visits) Coverage (proportion)            | --              |
| Down's syndrome                 | Male   | 0-6 days  | 65-69 years | Data Rich  | -1        | 3     | Maternal Education (years per capita)                      | --              |
| Down's syndrome                 | Male   | 0-6 days  | 65-69 years | Data Rich  | 1         | 3     | Indoor Air Pollution (All Cooking Fuels)                   | --              |
| Down's syndrome                 | Male   | 0-6 days  | 65-69 years | Data Rich  | 1         | 3     | Maternal alcohol consumption during pregnancy (proportion) | --              |
| Down's syndrome                 | Male   | 0-6 days  | 65-69 years | Data Rich  | 1         | 3     | Smoking Prevalence (Reproductive Age Standardized)         | --              |
| Down's syndrome                 | Male   | 0-6 days  | 65-69 years | Global     | -1        | 1     | Legality of Abortion                                       | --              |
| Down's syndrome                 | Male   | 0-6 days  | 65-69 years | Global     | 1         | 1     | Live Births 40+ (proportion)                               | 216             |
| Down's syndrome                 | Male   | 0-6 days  | 65-69 years | Global     | 1         | 1     | Birth prevalence of congenital chromosomal anomalies       | 574             |
| Down's syndrome                 | Male   | 0-6 days  | 65-69 years | Global     | 1         | 1     | Live Births 35+ (proportion)                               | 863             |
| Down's syndrome                 | Male   | 0-6 days  | 65-69 years | Global     | -1        | 2     | Healthcare access and quality index                        | --              |
| Down's syndrome                 | Male   | 0-6 days  | 65-69 years | Global     | -1        | 2     | In-Facility Delivery (proportion)                          | --              |
| Down's syndrome                 | Male   | 0-6 days  | 65-69 years | Global     | -1        | 2     | Socio-demographic Index                                    | --              |
| Down's syndrome                 | Male   | 0-6 days  | 65-69 years | Global     | -1        | 3     | vegetables unadjusted(g)                                   | 270             |
| Down's syndrome                 | Male   | 0-6 days  | 65-69 years | Global     | -1        | 3     | Antenatal Care (1 visit) Coverage (proportion)             | --              |
| Down's syndrome                 | Male   | 0-6 days  | 65-69 years | Global     | -1        | 3     | Antenatal Care (4 visits) Coverage (proportion)            | --              |
| Down's syndrome                 | Male   | 0-6 days  | 65-69 years | Global     | -1        | 3     | Maternal Education (years per capita)                      | --              |
| Down's syndrome                 | Male   | 0-6 days  | 65-69 years | Global     | 1         | 3     | Indoor Air Pollution (All Cooking Fuels)                   | --              |
| Down's syndrome                 | Male   | 0-6 days  | 65-69 years | Global     | 1         | 3     | Maternal alcohol consumption during pregnancy (proportion) | --              |
| Down's syndrome                 | Male   | 0-6 days  | 65-69 years | Global     | 1         | 3     | Smoking Prevalence (Reproductive Age Standardized)         | --              |
| Other chromosomal abnormalities | Female | 0-6 days  | 65-69 years | Data Rich  | -1        | 1     | Legality of Abortion                                       | --              |
| Other chromosomal abnormalities | Female | 0-6 days  | 65-69 years | Data Rich  | 1         | 1     | Live Births 35+ (proportion)                               | 1000            |
| Other chromosomal abnormalities | Female | 0-6 days  | 65-69 years | Data Rich  | 1         | 1     | Live Births 40+ (proportion)                               | --              |
| Other chromosomal abnormalities | Female | 0-6 days  | 65-69 years | Data Rich  | -1        | 2     | Antenatal Care (1 visit) Coverage (proportion)             | --              |
| Other chromosomal abnormalities | Female | 0-6 days  | 65-69 years | Data Rich  | -1        | 2     | Antenatal Care (4 visits) Coverage (proportion)            | --              |
| Other chromosomal abnormalities | Female | 0-6 days  | 65-69 years | Data Rich  | -1        | 2     | Healthcare access and quality index                        | --              |
| Other chromosomal abnormalities | Female | 0-6 days  | 65-69 years | Data Rich  | -1        | 2     | In-Facility Delivery (proportion)                          | --              |
| Other chromosomal abnormalities | Female | 0-6 days  | 65-69 years | Data Rich  | -1        | 2     | LDI (I\$ per capita)                                       | --              |
| Other chromosomal abnormalities | Female | 0-6 days  | 65-69 years | Data Rich  | 1         | 2     | Maternal alcohol consumption during pregnancy (proportion) | --              |
| Other chromosomal abnormalities | Female | 0-6 days  | 65-69 years | Data Rich  | -1        | 3     | Maternal Education (years per capita)                      | --              |
| Other chromosomal abnormalities | Female | 0-6 days  | 65-69 years | Data Rich  | -1        | 3     | Skilled Birth Attendance (proportion)                      | --              |
| Other chromosomal abnormalities | Female | 0-6 days  | 65-69 years | Data Rich  | 0         | 3     | Socio-demographic Index                                    | --              |
| Other chromosomal abnormalities | Female | 0-6 days  | 65-69 years | Data Rich  | 1         | 3     | Alcohol (liters per capita)                                | 481             |
| Other chromosomal abnormalities | Female | 0-6 days  | 65-69 years | Data Rich  | 1         | 3     | Indoor Air Pollution (All Cooking Fuels)                   | --              |
| Other chromosomal abnormalities | Female | 0-6 days  | 65-69 years | Data Rich  | 1         | 3     | Smoking Prevalence (Reproductive Age Standardized)         | --              |
| Other chromosomal abnormalities | Female | 0-6 days  | 65-69 years | Global     | -1        | 1     | Legality of Abortion                                       | --              |
| Other chromosomal abnormalities | Female | 0-6 days  | 65-69 years | Global     | 1         | 1     | Live Births 35+ (proportion)                               | 1000            |
| Other chromosomal abnormalities | Female | 0-6 days  | 65-69 years | Global     | 1         | 1     | Live Births 40+ (proportion)                               | --              |
| Other chromosomal abnormalities | Female | 0-6 days  | 65-69 years | Global     | -1        | 2     | Antenatal Care (1 visit) Coverage (proportion)             | --              |
| Other chromosomal abnormalities | Female | 0-6 days  | 65-69 years | Global     | -1        | 2     | Antenatal Care (4 visits) Coverage (proportion)            | --              |
| Other chromosomal abnormalities | Female | 0-6 days  | 65-69 years | Global     | -1        | 2     | Healthcare access and quality index                        | --              |
| Other chromosomal abnormalities | Female | 0-6 days  | 65-69 years | Global     | -1        | 2     | In-Facility Delivery (proportion)                          | --              |
| Other chromosomal abnormalities | Female | 0-6 days  | 65-69 years | Global     | -1        | 2     | LDI (I\$ per capita)                                       | --              |
| Other chromosomal abnormalities | Female | 0-6 days  | 65-69 years | Global     | 1         | 2     | Maternal alcohol consumption during pregnancy (proportion) | --              |
| Other chromosomal abnormalities | Female | 0-6 days  | 65-69 years | Global     | -1        | 3     | Maternal Education (years per capita)                      | --              |
| Other chromosomal abnormalities | Female | 0-6 days  | 65-69 years | Global     | -1        | 3     | Skilled Birth Attendance (proportion)                      | --              |
| Other chromosomal abnormalities | Female | 0-6 days  | 65-69 years | Global     | 0         | 3     | Socio-demographic Index                                    | 326             |
| Other chromosomal abnormalities | Female | 0-6 days  | 65-69 years | Global     | 1         | 3     | Alcohol (liters per capita)                                | 593             |
| Other chromosomal abnormalities | Female | 0-6 days  | 65-69 years | Global     | 1         | 3     | Indoor Air Pollution (All Cooking Fuels)                   | --              |
| Other chromosomal abnormalities | Female | 0-6 days  | 65-69 years | Global     | 1         | 3     | Smoking Prevalence (Reproductive Age Standardized)         | --              |
| Other chromosomal abnormalities | Male   | 0-6 days  | 65-69 years | Data Rich  | -1        | 1     | Legality of Abortion                                       | 707             |
| Other chromosomal abnormalities | Male   | 0-6 days  | 65-69 years | Data Rich  | 1         | 1     | Live Births 35+ (proportion)                               | 293             |
| Other chromosomal abnormalities | Male   | 0-6 days  | 65-69 years | Data Rich  | 1         | 1     | Live Births 40+ (proportion)                               | --              |
| Other chromosomal abnormalities | Male   | 0-6 days  | 65-69 years | Data Rich  | -1        | 2     | Antenatal Care (1 visit) Coverage (proportion)             | --              |
| Other chromosomal abnormalities | Male   | 0-6 days  | 65-69 years | Data Rich  | -1        | 2     | Antenatal Care (4 visits) Coverage (proportion)            | --              |
| Other chromosomal abnormalities | Male   | 0-6 days  | 65-69 years | Data Rich  | -1        | 2     | Healthcare access and quality index                        | --              |
| Other chromosomal abnormalities | Male   | 0-6 days  | 65-69 years | Data Rich  | -1        | 2     | In-Facility Delivery (proportion)                          | --              |
| Other chromosomal abnormalities | Male   | 0-6 days  | 65-69 years | Data Rich  | -1        | 2     | LDI (I\$ per capita)                                       | --              |
| Other chromosomal abnormalities | Male   | 0-6 days  | 65-69 years | Data Rich  | 1         | 2     | Maternal alcohol consumption during pregnancy (proportion) | --              |
| Other chromosomal abnormalities | Male   | 0-6 days  | 65-69 years | Data Rich  | -1        | 3     | Maternal Education (years per capita)                      | --              |
| Other chromosomal abnormalities | Male   | 0-6 days  | 65-69 years | Data Rich  | -1        | 3     | Skilled Birth Attendance (proportion)                      | --              |
| Other chromosomal abnormalities | Male   | 0-6 days  | 65-69 years | Data Rich  | 0         | 3     | Socio-demographic Index                                    | 486             |
| Other chromosomal abnormalities | Male   | 0-6 days  | 65-69 years | Data Rich  | 1         | 3     | Alcohol (liters per capita)                                | --              |

**Appendix Table 9: CODEm covariates used, level of covariate, and expected direction of covariate by cause, sex, and age**

*Covariates that CODEm did not select during the covariate selection process have no draw counts listed.*

| Cause                                         | Sex    | Age Start | Age End     | Model Type | Direction | Level | Covariate Name                                             | Number of Draws |
|-----------------------------------------------|--------|-----------|-------------|------------|-----------|-------|------------------------------------------------------------|-----------------|
| Other chromosomal abnormalities               | Male   | 0-6 days  | 65-69 years | Data Rich  | 1         | 3     | Indoor Air Pollution (All Cooking Fuels)                   | --              |
| Other chromosomal abnormalities               | Male   | 0-6 days  | 65-69 years | Data Rich  | 1         | 3     | Smoking Prevalence (Reproductive Age Standardized)         | --              |
| Other chromosomal abnormalities               | Male   | 0-6 days  | 65-69 years | Global     | -1        | 1     | Legality of Abortion                                       | 328             |
| Other chromosomal abnormalities               | Male   | 0-6 days  | 65-69 years | Global     | 1         | 1     | Live Births 35+ (proportion)                               | 672             |
| Other chromosomal abnormalities               | Male   | 0-6 days  | 65-69 years | Global     | 1         | 1     | Live Births 40+ (proportion)                               | --              |
| Other chromosomal abnormalities               | Male   | 0-6 days  | 65-69 years | Global     | -1        | 2     | Antenatal Care (1 visit) Coverage (proportion)             | --              |
| Other chromosomal abnormalities               | Male   | 0-6 days  | 65-69 years | Global     | -1        | 2     | Antenatal Care (4 visits) Coverage (proportion)            | --              |
| Other chromosomal abnormalities               | Male   | 0-6 days  | 65-69 years | Global     | -1        | 2     | Healthcare access and quality index                        | --              |
| Other chromosomal abnormalities               | Male   | 0-6 days  | 65-69 years | Global     | -1        | 2     | In-Facility Delivery (proportion)                          | --              |
| Other chromosomal abnormalities               | Male   | 0-6 days  | 65-69 years | Global     | -1        | 2     | LDI (I\$ per capita)                                       | --              |
| Other chromosomal abnormalities               | Male   | 0-6 days  | 65-69 years | Global     | 1         | 2     | Maternal alcohol consumption during pregnancy (proportion) | --              |
| Other chromosomal abnormalities               | Male   | 0-6 days  | 65-69 years | Global     | -1        | 3     | Maternal Education (years per capita)                      | --              |
| Other chromosomal abnormalities               | Male   | 0-6 days  | 65-69 years | Global     | -1        | 3     | Skilled Birth Attendance (proportion)                      | --              |
| Other chromosomal abnormalities               | Male   | 0-6 days  | 65-69 years | Global     | 0         | 3     | Socio-demographic Index                                    | 636             |
| Other chromosomal abnormalities               | Male   | 0-6 days  | 65-69 years | Global     | 1         | 3     | Alcohol (liters per capita)                                | --              |
| Other chromosomal abnormalities               | Male   | 0-6 days  | 65-69 years | Global     | 1         | 3     | Indoor Air Pollution (All Cooking Fuels)                   | --              |
| Other chromosomal abnormalities               | Male   | 0-6 days  | 65-69 years | Global     | 1         | 3     | Smoking Prevalence (Reproductive Age Standardized)         | --              |
| Congenital musculoskeletal and limb anomalies | Female | 0-6 days  | 65-69 years | Data Rich  | -1        | 1     | Legality of Abortion                                       | 674             |
| Congenital musculoskeletal and limb anomalies | Female | 0-6 days  | 65-69 years | Data Rich  | 1         | 1     | Maternal alcohol consumption during pregnancy (proportion) | --              |
| Congenital musculoskeletal and limb anomalies | Female | 0-6 days  | 65-69 years | Data Rich  | -1        | 2     | Healthcare access and quality index                        | --              |
| Congenital musculoskeletal and limb anomalies | Female | 0-6 days  | 65-69 years | Data Rich  | -1        | 2     | In-Facility Delivery (proportion)                          | --              |
| Congenital musculoskeletal and limb anomalies | Female | 0-6 days  | 65-69 years | Data Rich  | -1        | 2     | Socio-demographic Index                                    | --              |
| Congenital musculoskeletal and limb anomalies | Female | 0-6 days  | 65-69 years | Data Rich  | 1         | 2     | Diabetes Age-Standardized Prevalence (proportion)          | 185             |
| Congenital musculoskeletal and limb anomalies | Female | 0-6 days  | 65-69 years | Data Rich  | 1         | 2     | Indoor Air Pollution (All Cooking Fuels)                   | 185             |
| Congenital musculoskeletal and limb anomalies | Female | 0-6 days  | 65-69 years | Data Rich  | 1         | 2     | Smoking Prevalence (Reproductive Age Standardized)         | --              |
| Congenital musculoskeletal and limb anomalies | Female | 0-6 days  | 65-69 years | Data Rich  | -1        | 3     | Antenatal Care (1 visit) Coverage (proportion)             | --              |
| Congenital musculoskeletal and limb anomalies | Female | 0-6 days  | 65-69 years | Data Rich  | -1        | 3     | Antenatal Care (4 visits) Coverage (proportion)            | --              |
| Congenital musculoskeletal and limb anomalies | Female | 0-6 days  | 65-69 years | Data Rich  | -1        | 3     | LDI (I\$ per capita)                                       | --              |
| Congenital musculoskeletal and limb anomalies | Female | 0-6 days  | 65-69 years | Data Rich  | -1        | 3     | Maternal Education (years per capita)                      | --              |
| Congenital musculoskeletal and limb anomalies | Female | 0-6 days  | 65-69 years | Data Rich  | 0         | 3     | fruits unadjusted(g)                                       | 326             |
| Congenital musculoskeletal and limb anomalies | Female | 0-6 days  | 65-69 years | Data Rich  | 0         | 3     | vegetables unadjusted(g)                                   | --              |
| Congenital musculoskeletal and limb anomalies | Female | 0-6 days  | 65-69 years | Data Rich  | 1         | 3     | Alcohol (liters per capita)                                | 326             |
| Congenital musculoskeletal and limb anomalies | Female | 0-6 days  | 65-69 years | Global     | -1        | 1     | Legality of Abortion                                       | 254             |
| Congenital musculoskeletal and limb anomalies | Female | 0-6 days  | 65-69 years | Global     | 1         | 1     | Maternal alcohol consumption during pregnancy (proportion) | --              |
| Congenital musculoskeletal and limb anomalies | Female | 0-6 days  | 65-69 years | Global     | -1        | 2     | Healthcare access and quality index                        | --              |
| Congenital musculoskeletal and limb anomalies | Female | 0-6 days  | 65-69 years | Global     | -1        | 2     | In-Facility Delivery (proportion)                          | --              |
| Congenital musculoskeletal and limb anomalies | Female | 0-6 days  | 65-69 years | Global     | -1        | 2     | Socio-demographic Index                                    | --              |
| Congenital musculoskeletal and limb anomalies | Female | 0-6 days  | 65-69 years | Global     | 1         | 2     | Diabetes Age-Standardized Prevalence (proportion)          | 541             |
| Congenital musculoskeletal and limb anomalies | Female | 0-6 days  | 65-69 years | Global     | 1         | 2     | Indoor Air Pollution (All Cooking Fuels)                   | --              |
| Congenital musculoskeletal and limb anomalies | Female | 0-6 days  | 65-69 years | Global     | 1         | 2     | Smoking Prevalence (Reproductive Age Standardized)         | --              |
| Congenital musculoskeletal and limb anomalies | Female | 0-6 days  | 65-69 years | Global     | -1        | 3     | Antenatal Care (1 visit) Coverage (proportion)             | --              |
| Congenital musculoskeletal and limb anomalies | Female | 0-6 days  | 65-69 years | Global     | -1        | 3     | Antenatal Care (4 visits) Coverage (proportion)            | --              |
| Congenital musculoskeletal and limb anomalies | Female | 0-6 days  | 65-69 years | Global     | -1        | 3     | LDI (I\$ per capita)                                       | --              |
| Congenital musculoskeletal and limb anomalies | Female | 0-6 days  | 65-69 years | Global     | -1        | 3     | Maternal Education (years per capita)                      | --              |
| Congenital musculoskeletal and limb anomalies | Female | 0-6 days  | 65-69 years | Global     | 0         | 3     | vegetables unadjusted(g)                                   | 197             |
| Congenital musculoskeletal and limb anomalies | Female | 0-6 days  | 65-69 years | Global     | 0         | 3     | fruits unadjusted(g)                                       | 336             |
| Congenital musculoskeletal and limb anomalies | Female | 0-6 days  | 65-69 years | Global     | 1         | 3     | Alcohol (liters per capita)                                | 239             |
| Congenital musculoskeletal and limb anomalies | Male   | 0-6 days  | 65-69 years | Data Rich  | -1        | 1     | Legality of Abortion                                       | 807             |
| Congenital musculoskeletal and limb anomalies | Male   | 0-6 days  | 65-69 years | Data Rich  | 1         | 1     | Maternal alcohol consumption during pregnancy (proportion) | --              |
| Congenital musculoskeletal and limb anomalies | Male   | 0-6 days  | 65-69 years | Data Rich  | -1        | 2     | Healthcare access and quality index                        | 44              |
| Congenital musculoskeletal and limb anomalies | Male   | 0-6 days  | 65-69 years | Data Rich  | -1        | 2     | Socio-demographic Index                                    | 264             |
| Congenital musculoskeletal and limb anomalies | Male   | 0-6 days  | 65-69 years | Data Rich  | -1        | 2     | In-Facility Delivery (proportion)                          | --              |
| Congenital musculoskeletal and limb anomalies | Male   | 0-6 days  | 65-69 years | Data Rich  | 1         | 2     | Indoor Air Pollution (All Cooking Fuels)                   | 35              |
| Congenital musculoskeletal and limb anomalies | Male   | 0-6 days  | 65-69 years | Data Rich  | 1         | 2     | Smoking Prevalence (Reproductive Age Standardized)         | 79              |
| Congenital musculoskeletal and limb anomalies | Male   | 0-6 days  | 65-69 years | Data Rich  | 1         | 2     | Diabetes Age-Standardized Prevalence (proportion)          | --              |
| Congenital musculoskeletal and limb anomalies | Male   | 0-6 days  | 65-69 years | Data Rich  | -1        | 3     | Antenatal Care (1 visit) Coverage (proportion)             | 16              |
| Congenital musculoskeletal and limb anomalies | Male   | 0-6 days  | 65-69 years | Data Rich  | -1        | 3     | Antenatal Care (4 visits) Coverage (proportion)            | 52              |
| Congenital musculoskeletal and limb anomalies | Male   | 0-6 days  | 65-69 years | Data Rich  | -1        | 3     | Maternal Education (years per capita)                      | 329             |
| Congenital musculoskeletal and limb anomalies | Male   | 0-6 days  | 65-69 years | Data Rich  | -1        | 3     | LDI (I\$ per capita)                                       | --              |
| Congenital musculoskeletal and limb anomalies | Male   | 0-6 days  | 65-69 years | Data Rich  | 0         | 3     | fruits unadjusted(g)                                       | 240             |
| Congenital musculoskeletal and limb anomalies | Male   | 0-6 days  | 65-69 years | Data Rich  | 0         | 3     | vegetables unadjusted(g)                                   | 399             |
| Congenital musculoskeletal and limb anomalies | Male   | 0-6 days  | 65-69 years | Data Rich  | 1         | 3     | Alcohol (liters per capita)                                | --              |
| Congenital musculoskeletal and limb anomalies | Male   | 0-6 days  | 65-69 years | Global     | -1        | 1     | Legality of Abortion                                       | 809             |
| Congenital musculoskeletal and limb anomalies | Male   | 0-6 days  | 65-69 years | Global     | 1         | 1     | Maternal alcohol consumption during pregnancy (proportion) | --              |
| Congenital musculoskeletal and limb anomalies | Male   | 0-6 days  | 65-69 years | Global     | -1        | 2     | In-Facility Delivery (proportion)                          | 58              |
| Congenital musculoskeletal and limb anomalies | Male   | 0-6 days  | 65-69 years | Global     | -1        | 2     | Socio-demographic Index                                    | 143             |
| Congenital musculoskeletal and limb anomalies | Male   | 0-6 days  | 65-69 years | Global     | -1        | 2     | Healthcare access and quality index                        | 268             |
| Congenital musculoskeletal and limb anomalies | Male   | 0-6 days  | 65-69 years | Global     | 1         | 2     | Indoor Air Pollution (All Cooking Fuels)                   | 140             |
| Congenital musculoskeletal and limb anomalies | Male   | 0-6 days  | 65-69 years | Global     | 1         | 2     | Diabetes Age-Standardized Prevalence (proportion)          | 191             |
| Congenital musculoskeletal and limb anomalies | Male   | 0-6 days  | 65-69 years | Global     | 1         | 2     | Smoking Prevalence (Reproductive Age Standardized)         | 350             |
| Congenital musculoskeletal and limb anomalies | Male   | 0-6 days  | 65-69 years | Global     | -1        | 3     | Antenatal Care (4 visits) Coverage (proportion)            | 11              |
| Congenital musculoskeletal and limb anomalies | Male   | 0-6 days  | 65-69 years | Global     | -1        | 3     | Antenatal Care (1 visit) Coverage (proportion)             | 84              |
| Congenital musculoskeletal and limb anomalies | Male   | 0-6 days  | 65-69 years | Global     | -1        | 3     | Maternal Education (years per capita)                      | 125             |
| Congenital musculoskeletal and limb anomalies | Male   | 0-6 days  | 65-69 years | Global     | -1        | 3     | LDI (I\$ per capita)                                       | --              |
| Congenital musculoskeletal and limb anomalies | Male   | 0-6 days  | 65-69 years | Global     | 0         | 3     | fruits unadjusted(g)                                       | 86              |
| Congenital musculoskeletal and limb anomalies | Male   | 0-6 days  | 65-69 years | Global     | 0         | 3     | vegetables unadjusted(g)                                   | 482             |
| Congenital musculoskeletal and limb anomalies | Male   | 0-6 days  | 65-69 years | Global     | 1         | 3     | Alcohol (liters per capita)                                | 314             |
| Urogenital congenital anomalies               | Female | 0-6 days  | 65-69 years | Data Rich  | 1         | 1     | Maternal alcohol consumption during pregnancy (proportion) | --              |

**Appendix Table 9: CODEm covariates used, level of covariate, and expected direction of covariate by cause, sex, and age**

*Covariates that CODEm did not select during the covariate selection process have no draw counts listed.*

| Cause                           | Sex    | Age Start | Age End     | Model Type | Direction | Level | Covariate Name                                             | Number of Draws |
|---------------------------------|--------|-----------|-------------|------------|-----------|-------|------------------------------------------------------------|-----------------|
| Urogenital congenital anomalies | Female | 0-6 days  | 65-69 years | Data Rich  | 1         | 1     | Smoking Prevalence (Reproductive Age Standardized)         | --              |
| Urogenital congenital anomalies | Female | 0-6 days  | 65-69 years | Data Rich  | -1        | 2     | Healthcare access and quality index                        | 153             |
| Urogenital congenital anomalies | Female | 0-6 days  | 65-69 years | Data Rich  | -1        | 2     | Socio-demographic Index                                    | 480             |
| Urogenital congenital anomalies | Female | 0-6 days  | 65-69 years | Data Rich  | -1        | 2     | In-Facility Delivery (proportion)                          | --              |
| Urogenital congenital anomalies | Female | 0-6 days  | 65-69 years | Data Rich  | 1         | 2     | Diabetes Age-Standardized Prevalence (proportion)          | 807             |
| Urogenital congenital anomalies | Female | 0-6 days  | 65-69 years | Data Rich  | 1         | 2     | Indoor Air Pollution (All Cooking Fuels)                   | --              |
| Urogenital congenital anomalies | Female | 0-6 days  | 65-69 years | Data Rich  | 1         | 2     | Outdoor Air Pollution (PM2.5)                              | --              |
| Urogenital congenital anomalies | Female | 0-6 days  | 65-69 years | Data Rich  | -1        | 3     | Maternal Education (years per capita)                      | 193             |
| Urogenital congenital anomalies | Female | 0-6 days  | 65-69 years | Data Rich  | -1        | 3     | Antenatal Care (4 visits) Coverage (proportion)            | 211             |
| Urogenital congenital anomalies | Female | 0-6 days  | 65-69 years | Data Rich  | -1        | 3     | Antenatal Care (1 visit) Coverage (proportion)             | --              |
| Urogenital congenital anomalies | Female | 0-6 days  | 65-69 years | Data Rich  | -1        | 3     | LDI (US per capita)                                        | --              |
| Urogenital congenital anomalies | Female | 0-6 days  | 65-69 years | Data Rich  | 1         | 3     | Alcohol (liters per capita)                                | --              |
| Urogenital congenital anomalies | Female | 0-6 days  | 65-69 years | Global     | 1         | 1     | Maternal alcohol consumption during pregnancy (proportion) | --              |
| Urogenital congenital anomalies | Female | 0-6 days  | 65-69 years | Global     | 1         | 1     | Smoking Prevalence (Reproductive Age Standardized)         | --              |
| Urogenital congenital anomalies | Female | 0-6 days  | 65-69 years | Global     | -1        | 2     | In-Facility Delivery (proportion)                          | 171             |
| Urogenital congenital anomalies | Female | 0-6 days  | 65-69 years | Global     | -1        | 2     | Healthcare access and quality index                        | 180             |
| Urogenital congenital anomalies | Female | 0-6 days  | 65-69 years | Global     | -1        | 2     | Socio-demographic Index                                    | 364             |
| Urogenital congenital anomalies | Female | 0-6 days  | 65-69 years | Global     | 1         | 2     | Indoor Air Pollution (All Cooking Fuels)                   | 535             |
| Urogenital congenital anomalies | Female | 0-6 days  | 65-69 years | Global     | 1         | 2     | Diabetes Age-Standardized Prevalence (proportion)          | 940             |
| Urogenital congenital anomalies | Female | 0-6 days  | 65-69 years | Global     | 1         | 2     | Outdoor Air Pollution (PM2.5)                              | --              |
| Urogenital congenital anomalies | Female | 0-6 days  | 65-69 years | Global     | -1        | 3     | Antenatal Care (4 visits) Coverage (proportion)            | 172             |
| Urogenital congenital anomalies | Female | 0-6 days  | 65-69 years | Global     | -1        | 3     | Maternal Education (years per capita)                      | 195             |
| Urogenital congenital anomalies | Female | 0-6 days  | 65-69 years | Global     | -1        | 3     | Antenatal Care (1 visit) Coverage (proportion)             | --              |
| Urogenital congenital anomalies | Female | 0-6 days  | 65-69 years | Global     | -1        | 3     | LDI (US per capita)                                        | --              |
| Urogenital congenital anomalies | Female | 0-6 days  | 65-69 years | Global     | 1         | 3     | Alcohol (liters per capita)                                | --              |
| Urogenital congenital anomalies | Male   | 0-6 days  | 65-69 years | Data Rich  | 1         | 1     | Maternal alcohol consumption during pregnancy (proportion) | --              |
| Urogenital congenital anomalies | Male   | 0-6 days  | 65-69 years | Data Rich  | 1         | 1     | Smoking Prevalence (Reproductive Age Standardized)         | --              |
| Urogenital congenital anomalies | Male   | 0-6 days  | 65-69 years | Data Rich  | -1        | 2     | Healthcare access and quality index                        | 546             |
| Urogenital congenital anomalies | Male   | 0-6 days  | 65-69 years | Data Rich  | -1        | 2     | In-Facility Delivery (proportion)                          | --              |
| Urogenital congenital anomalies | Male   | 0-6 days  | 65-69 years | Data Rich  | -1        | 2     | Socio-demographic Index                                    | --              |
| Urogenital congenital anomalies | Male   | 0-6 days  | 65-69 years | Data Rich  | 1         | 2     | Outdoor Air Pollution (PM2.5)                              | 546             |
| Urogenital congenital anomalies | Male   | 0-6 days  | 65-69 years | Data Rich  | 1         | 2     | Diabetes Age-Standardized Prevalence (proportion)          | 1000            |
| Urogenital congenital anomalies | Male   | 0-6 days  | 65-69 years | Data Rich  | 1         | 2     | Indoor Air Pollution (All Cooking Fuels)                   | --              |
| Urogenital congenital anomalies | Male   | 0-6 days  | 65-69 years | Data Rich  | -1        | 3     | Antenatal Care (1 visit) Coverage (proportion)             | --              |
| Urogenital congenital anomalies | Male   | 0-6 days  | 65-69 years | Data Rich  | -1        | 3     | Antenatal Care (4 visits) Coverage (proportion)            | --              |
| Urogenital congenital anomalies | Male   | 0-6 days  | 65-69 years | Data Rich  | -1        | 3     | LDI (US per capita)                                        | --              |
| Urogenital congenital anomalies | Male   | 0-6 days  | 65-69 years | Data Rich  | -1        | 3     | Maternal Education (years per capita)                      | --              |
| Urogenital congenital anomalies | Male   | 0-6 days  | 65-69 years | Data Rich  | 1         | 3     | Alcohol (liters per capita)                                | --              |
| Urogenital congenital anomalies | Male   | 0-6 days  | 65-69 years | Global     | 1         | 1     | Maternal alcohol consumption during pregnancy (proportion) | --              |
| Urogenital congenital anomalies | Male   | 0-6 days  | 65-69 years | Global     | 1         | 1     | Smoking Prevalence (Reproductive Age Standardized)         | --              |
| Urogenital congenital anomalies | Male   | 0-6 days  | 65-69 years | Global     | -1        | 2     | Socio-demographic Index                                    | 131             |
| Urogenital congenital anomalies | Male   | 0-6 days  | 65-69 years | Global     | -1        | 2     | Healthcare access and quality index                        | 160             |
| Urogenital congenital anomalies | Male   | 0-6 days  | 65-69 years | Global     | -1        | 2     | In-Facility Delivery (proportion)                          | 385             |
| Urogenital congenital anomalies | Male   | 0-6 days  | 65-69 years | Global     | 1         | 2     | Outdoor Air Pollution (PM2.5)                              | 214             |
| Urogenital congenital anomalies | Male   | 0-6 days  | 65-69 years | Global     | 1         | 2     | Indoor Air Pollution (All Cooking Fuels)                   | 414             |
| Urogenital congenital anomalies | Male   | 0-6 days  | 65-69 years | Global     | 1         | 2     | Diabetes Age-Standardized Prevalence (proportion)          | 759             |
| Urogenital congenital anomalies | Male   | 0-6 days  | 65-69 years | Global     | -1        | 3     | Maternal Education (years per capita)                      | 49              |
| Urogenital congenital anomalies | Male   | 0-6 days  | 65-69 years | Global     | -1        | 3     | Antenatal Care (4 visits) Coverage (proportion)            | 160             |
| Urogenital congenital anomalies | Male   | 0-6 days  | 65-69 years | Global     | -1        | 3     | Antenatal Care (1 visit) Coverage (proportion)             | --              |
| Urogenital congenital anomalies | Male   | 0-6 days  | 65-69 years | Global     | -1        | 3     | LDI (US per capita)                                        | --              |
| Urogenital congenital anomalies | Male   | 0-6 days  | 65-69 years | Global     | 1         | 3     | Alcohol (liters per capita)                                | --              |
| Digestive congenital anomalies  | Female | 0-6 days  | 65-69 years | Data Rich  | 1         | 1     | Smoking Prevalence (Reproductive Age Standardized)         | 532             |
| Digestive congenital anomalies  | Female | 0-6 days  | 65-69 years | Data Rich  | 1         | 1     | Maternal alcohol consumption during pregnancy (proportion) | --              |
| Digestive congenital anomalies  | Female | 0-6 days  | 65-69 years | Data Rich  | -1        | 2     | Socio-demographic Index                                    | 114             |
| Digestive congenital anomalies  | Female | 0-6 days  | 65-69 years | Data Rich  | -1        | 2     | Healthcare access and quality index                        | 340             |
| Digestive congenital anomalies  | Female | 0-6 days  | 65-69 years | Data Rich  | -1        | 2     | In-Facility Delivery (proportion)                          | --              |
| Digestive congenital anomalies  | Female | 0-6 days  | 65-69 years | Data Rich  | 1         | 2     | Diabetes Age-Standardized Prevalence (proportion)          | 187             |
| Digestive congenital anomalies  | Female | 0-6 days  | 65-69 years | Data Rich  | 1         | 2     | Prevalence of obesity (age-standardized)                   | 768             |
| Digestive congenital anomalies  | Female | 0-6 days  | 65-69 years | Data Rich  | 1         | 2     | Indoor Air Pollution (All Cooking Fuels)                   | --              |
| Digestive congenital anomalies  | Female | 0-6 days  | 65-69 years | Data Rich  | -1        | 3     | Maternal Education (years per capita)                      | 20              |
| Digestive congenital anomalies  | Female | 0-6 days  | 65-69 years | Data Rich  | -1        | 3     | Health System Access (capped)                              | 267             |
| Digestive congenital anomalies  | Female | 0-6 days  | 65-69 years | Data Rich  | -1        | 3     | Antenatal Care (1 visit) Coverage (proportion)             | --              |
| Digestive congenital anomalies  | Female | 0-6 days  | 65-69 years | Data Rich  | -1        | 3     | Antenatal Care (4 visits) Coverage (proportion)            | --              |
| Digestive congenital anomalies  | Female | 0-6 days  | 65-69 years | Data Rich  | -1        | 3     | LDI (US per capita)                                        | --              |
| Digestive congenital anomalies  | Female | 0-6 days  | 65-69 years | Data Rich  | 0         | 3     | vegetables unadjusted(g)                                   | 285             |
| Digestive congenital anomalies  | Female | 0-6 days  | 65-69 years | Data Rich  | 0         | 3     | fruits unadjusted(g)                                       | 522             |
| Digestive congenital anomalies  | Female | 0-6 days  | 65-69 years | Data Rich  | 1         | 3     | Alcohol (liters per capita)                                | 356             |
| Digestive congenital anomalies  | Female | 0-6 days  | 65-69 years | Global     | 1         | 1     | Smoking Prevalence (Reproductive Age Standardized)         | 282             |
| Digestive congenital anomalies  | Female | 0-6 days  | 65-69 years | Global     | 1         | 1     | Maternal alcohol consumption during pregnancy (proportion) | --              |
| Digestive congenital anomalies  | Female | 0-6 days  | 65-69 years | Global     | -1        | 2     | Healthcare access and quality index                        | 141             |
| Digestive congenital anomalies  | Female | 0-6 days  | 65-69 years | Global     | -1        | 2     | In-Facility Delivery (proportion)                          | --              |
| Digestive congenital anomalies  | Female | 0-6 days  | 65-69 years | Global     | -1        | 2     | Socio-demographic Index                                    | --              |
| Digestive congenital anomalies  | Female | 0-6 days  | 65-69 years | Global     | 1         | 2     | Prevalence of obesity (age-standardized)                   | 348             |
| Digestive congenital anomalies  | Female | 0-6 days  | 65-69 years | Global     | 1         | 2     | Diabetes Age-Standardized Prevalence (proportion)          | 397             |
| Digestive congenital anomalies  | Female | 0-6 days  | 65-69 years | Global     | 1         | 2     | Indoor Air Pollution (All Cooking Fuels)                   | --              |
| Digestive congenital anomalies  | Female | 0-6 days  | 65-69 years | Global     | -1        | 3     | Health System Access (capped)                              | 64              |
| Digestive congenital anomalies  | Female | 0-6 days  | 65-69 years | Global     | -1        | 3     | Antenatal Care (1 visit) Coverage (proportion)             | --              |
| Digestive congenital anomalies  | Female | 0-6 days  | 65-69 years | Global     | -1        | 3     | Antenatal Care (4 visits) Coverage (proportion)            | --              |

**Appendix Table 9: CODEm covariates used, level of covariate, and expected direction of covariate by cause, sex, and age**

*Covariates that CODEm did not select during the covariate selection process have no draw counts listed.*

| Cause                          | Sex    | Age Start | Age End     | Model Type | Direction | Level | Covariate Name                                             | Number of Draws |
|--------------------------------|--------|-----------|-------------|------------|-----------|-------|------------------------------------------------------------|-----------------|
| Digestive congenital anomalies | Female | 0-6 days  | 65-69 years | Global     | -1        | 3     | LDI (IS per capita)                                        | --              |
| Digestive congenital anomalies | Female | 0-6 days  | 65-69 years | Global     | -1        | 3     | Maternal Education (years per capita)                      | --              |
| Digestive congenital anomalies | Female | 0-6 days  | 65-69 years | Global     | 0         | 3     | fruits unadjusted(g)                                       | 414             |
| Digestive congenital anomalies | Female | 0-6 days  | 65-69 years | Global     | 0         | 3     | vegetables unadjusted(g)                                   | 459             |
| Digestive congenital anomalies | Female | 0-6 days  | 65-69 years | Global     | 1         | 3     | Alcohol (liters per capita)                                | 472             |
| Digestive congenital anomalies | Male   | 0-6 days  | 65-69 years | Data Rich  | 1         | 1     | Smoking Prevalence (Reproductive Age Standardized)         | 333             |
| Digestive congenital anomalies | Male   | 0-6 days  | 65-69 years | Data Rich  | 1         | 1     | Maternal alcohol consumption during pregnancy (proportion) | --              |
| Digestive congenital anomalies | Male   | 0-6 days  | 65-69 years | Data Rich  | -1        | 2     | Healthcare access and quality index                        | 96              |
| Digestive congenital anomalies | Male   | 0-6 days  | 65-69 years | Data Rich  | -1        | 2     | Socio-demographic Index                                    | 121             |
| Digestive congenital anomalies | Male   | 0-6 days  | 65-69 years | Data Rich  | -1        | 2     | In-Facility Delivery (proportion)                          | --              |
| Digestive congenital anomalies | Male   | 0-6 days  | 65-69 years | Data Rich  | 1         | 2     | Diabetes Age-Standardized Prevalence (proportion)          | 307             |
| Digestive congenital anomalies | Male   | 0-6 days  | 65-69 years | Data Rich  | 1         | 2     | Prevalence of obesity (age-standardized)                   | 347             |
| Digestive congenital anomalies | Male   | 0-6 days  | 65-69 years | Data Rich  | 1         | 2     | Indoor Air Pollution (All Cooking Fuels)                   | --              |
| Digestive congenital anomalies | Male   | 0-6 days  | 65-69 years | Data Rich  | -1        | 3     | Maternal Education (years per capita)                      | 24              |
| Digestive congenital anomalies | Male   | 0-6 days  | 65-69 years | Data Rich  | -1        | 3     | Health System Access (capped)                              | 184             |
| Digestive congenital anomalies | Male   | 0-6 days  | 65-69 years | Data Rich  | -1        | 3     | Antenatal Care (1 visit) Coverage (proportion)             | --              |
| Digestive congenital anomalies | Male   | 0-6 days  | 65-69 years | Data Rich  | -1        | 3     | Antenatal Care (4 visits) Coverage (proportion)            | --              |
| Digestive congenital anomalies | Male   | 0-6 days  | 65-69 years | Data Rich  | -1        | 3     | LDI (IS per capita)                                        | --              |
| Digestive congenital anomalies | Male   | 0-6 days  | 65-69 years | Data Rich  | 0         | 3     | vegetables unadjusted(g)                                   | 406             |
| Digestive congenital anomalies | Male   | 0-6 days  | 65-69 years | Data Rich  | 0         | 3     | fruits unadjusted(g)                                       | 467             |
| Digestive congenital anomalies | Male   | 0-6 days  | 65-69 years | Data Rich  | 1         | 3     | Alcohol (liters per capita)                                | 342             |
| Digestive congenital anomalies | Male   | 0-6 days  | 65-69 years | Global     | 1         | 1     | Maternal alcohol consumption during pregnancy (proportion) | 260             |
| Digestive congenital anomalies | Male   | 0-6 days  | 65-69 years | Global     | 1         | 1     | Smoking Prevalence (Reproductive Age Standardized)         | --              |
| Digestive congenital anomalies | Male   | 0-6 days  | 65-69 years | Global     | -1        | 2     | Socio-demographic Index                                    | 88              |
| Digestive congenital anomalies | Male   | 0-6 days  | 65-69 years | Global     | -1        | 2     | Healthcare access and quality index                        | 118             |
| Digestive congenital anomalies | Male   | 0-6 days  | 65-69 years | Global     | -1        | 2     | In-Facility Delivery (proportion)                          | --              |
| Digestive congenital anomalies | Male   | 0-6 days  | 65-69 years | Global     | 1         | 2     | Prevalence of obesity (age-standardized)                   | 359             |
| Digestive congenital anomalies | Male   | 0-6 days  | 65-69 years | Global     | 1         | 2     | Diabetes Age-Standardized Prevalence (proportion)          | 487             |
| Digestive congenital anomalies | Male   | 0-6 days  | 65-69 years | Global     | 1         | 2     | Indoor Air Pollution (All Cooking Fuels)                   | --              |
| Digestive congenital anomalies | Male   | 0-6 days  | 65-69 years | Global     | -1        | 3     | Maternal Education (years per capita)                      | 39              |
| Digestive congenital anomalies | Male   | 0-6 days  | 65-69 years | Global     | -1        | 3     | Health System Access (capped)                              | 59              |
| Digestive congenital anomalies | Male   | 0-6 days  | 65-69 years | Global     | -1        | 3     | Antenatal Care (1 visit) Coverage (proportion)             | --              |
| Digestive congenital anomalies | Male   | 0-6 days  | 65-69 years | Global     | -1        | 3     | Antenatal Care (4 visits) Coverage (proportion)            | --              |
| Digestive congenital anomalies | Male   | 0-6 days  | 65-69 years | Global     | -1        | 3     | LDI (IS per capita)                                        | --              |
| Digestive congenital anomalies | Male   | 0-6 days  | 65-69 years | Global     | 0         | 3     | vegetables unadjusted(g)                                   | 137             |
| Digestive congenital anomalies | Male   | 0-6 days  | 65-69 years | Global     | 0         | 3     | fruits unadjusted(g)                                       | 178             |
| Digestive congenital anomalies | Male   | 0-6 days  | 65-69 years | Global     | 1         | 3     | Alcohol (liters per capita)                                | 461             |
| Other congenital anomalies     | Female | 0-6 days  | 65-69 years | Data Rich  | 1         | 1     | Live Births 35+ (proportion)                               | 282             |
| Other congenital anomalies     | Female | 0-6 days  | 65-69 years | Data Rich  | 1         | 1     | Maternal alcohol consumption during pregnancy (proportion) | --              |
| Other congenital anomalies     | Female | 0-6 days  | 65-69 years | Data Rich  | -1        | 2     | Healthcare access and quality index                        | 354             |
| Other congenital anomalies     | Female | 0-6 days  | 65-69 years | Data Rich  | -1        | 2     | In-Facility Delivery (proportion)                          | --              |
| Other congenital anomalies     | Female | 0-6 days  | 65-69 years | Data Rich  | -1        | 2     | Legality of Abortion                                       | --              |
| Other congenital anomalies     | Female | 0-6 days  | 65-69 years | Data Rich  | 1         | 2     | Smoking Prevalence (Reproductive Age Standardized)         | 354             |
| Other congenital anomalies     | Female | 0-6 days  | 65-69 years | Data Rich  | 1         | 2     | Indoor Air Pollution (All Cooking Fuels)                   | --              |
| Other congenital anomalies     | Female | 0-6 days  | 65-69 years | Data Rich  | -1        | 3     | Maternal Education (years per capita)                      | 153             |
| Other congenital anomalies     | Female | 0-6 days  | 65-69 years | Data Rich  | -1        | 3     | Socio-demographic Index                                    | 211             |
| Other congenital anomalies     | Female | 0-6 days  | 65-69 years | Data Rich  | -1        | 3     | Antenatal Care (1 visit) Coverage (proportion)             | --              |
| Other congenital anomalies     | Female | 0-6 days  | 65-69 years | Data Rich  | -1        | 3     | Antenatal Care (4 visits) Coverage (proportion)            | --              |
| Other congenital anomalies     | Female | 0-6 days  | 65-69 years | Data Rich  | -1        | 3     | LDI (IS per capita)                                        | --              |
| Other congenital anomalies     | Female | 0-6 days  | 65-69 years | Data Rich  | 1         | 3     | Diabetes Age-Standardized Prevalence (proportion)          | 415             |
| Other congenital anomalies     | Female | 0-6 days  | 65-69 years | Data Rich  | 1         | 3     | Alcohol (liters per capita)                                | --              |
| Other congenital anomalies     | Female | 0-6 days  | 65-69 years | Global     | 1         | 1     | Live Births 35+ (proportion)                               | 405             |
| Other congenital anomalies     | Female | 0-6 days  | 65-69 years | Global     | 1         | 1     | Maternal alcohol consumption during pregnancy (proportion) | --              |
| Other congenital anomalies     | Female | 0-6 days  | 65-69 years | Global     | -1        | 2     | Healthcare access and quality index                        | 236             |
| Other congenital anomalies     | Female | 0-6 days  | 65-69 years | Global     | -1        | 2     | In-Facility Delivery (proportion)                          | --              |
| Other congenital anomalies     | Female | 0-6 days  | 65-69 years | Global     | -1        | 2     | Legality of Abortion                                       | --              |
| Other congenital anomalies     | Female | 0-6 days  | 65-69 years | Global     | 1         | 2     | Smoking Prevalence (Reproductive Age Standardized)         | 236             |
| Other congenital anomalies     | Female | 0-6 days  | 65-69 years | Global     | 1         | 2     | Indoor Air Pollution (All Cooking Fuels)                   | --              |
| Other congenital anomalies     | Female | 0-6 days  | 65-69 years | Global     | -1        | 3     | Antenatal Care (4 visits) Coverage (proportion)            | 133             |
| Other congenital anomalies     | Female | 0-6 days  | 65-69 years | Global     | -1        | 3     | Socio-demographic Index                                    | 148             |
| Other congenital anomalies     | Female | 0-6 days  | 65-69 years | Global     | -1        | 3     | Maternal Education (years per capita)                      | 161             |
| Other congenital anomalies     | Female | 0-6 days  | 65-69 years | Global     | -1        | 3     | Antenatal Care (1 visit) Coverage (proportion)             | --              |
| Other congenital anomalies     | Female | 0-6 days  | 65-69 years | Global     | -1        | 3     | LDI (IS per capita)                                        | --              |
| Other congenital anomalies     | Female | 0-6 days  | 65-69 years | Global     | 1         | 3     | Diabetes Age-Standardized Prevalence (proportion)          | 674             |
| Other congenital anomalies     | Female | 0-6 days  | 65-69 years | Global     | 1         | 3     | Alcohol (liters per capita)                                | --              |
| Other congenital anomalies     | Male   | 0-6 days  | 65-69 years | Data Rich  | 1         | 1     | Live Births 35+ (proportion)                               | 428             |
| Other congenital anomalies     | Male   | 0-6 days  | 65-69 years | Data Rich  | 1         | 1     | Maternal alcohol consumption during pregnancy (proportion) | --              |
| Other congenital anomalies     | Male   | 0-6 days  | 65-69 years | Data Rich  | -1        | 2     | Healthcare access and quality index                        | 196             |
| Other congenital anomalies     | Male   | 0-6 days  | 65-69 years | Data Rich  | -1        | 2     | In-Facility Delivery (proportion)                          | --              |
| Other congenital anomalies     | Male   | 0-6 days  | 65-69 years | Data Rich  | -1        | 2     | Legality of Abortion                                       | --              |
| Other congenital anomalies     | Male   | 0-6 days  | 65-69 years | Data Rich  | 1         | 2     | Smoking Prevalence (Reproductive Age Standardized)         | 196             |
| Other congenital anomalies     | Male   | 0-6 days  | 65-69 years | Data Rich  | 1         | 2     | Indoor Air Pollution (All Cooking Fuels)                   | --              |
| Other congenital anomalies     | Male   | 0-6 days  | 65-69 years | Data Rich  | -1        | 3     | Socio-demographic Index                                    | 227             |
| Other congenital anomalies     | Male   | 0-6 days  | 65-69 years | Data Rich  | -1        | 3     | Maternal Education (years per capita)                      | 256             |
| Other congenital anomalies     | Male   | 0-6 days  | 65-69 years | Data Rich  | -1        | 3     | Antenatal Care (1 visit) Coverage (proportion)             | --              |
| Other congenital anomalies     | Male   | 0-6 days  | 65-69 years | Data Rich  | -1        | 3     | Antenatal Care (4 visits) Coverage (proportion)            | --              |
| Other congenital anomalies     | Male   | 0-6 days  | 65-69 years | Data Rich  | -1        | 3     | LDI (IS per capita)                                        | --              |
| Other congenital anomalies     | Male   | 0-6 days  | 65-69 years | Data Rich  | 1         | 3     | Diabetes Age-Standardized Prevalence (proportion)          | 719             |



**Appendix Table 9: CODEm covariates used, level of covariate, and expected direction of covariate by cause, sex, and age**

*Covariates that CODEm did not select during the covariate selection process have no draw counts listed.*

| Cause                                 | Sex    | Age Start | Age End     | Model Type | Direction | Level | Covariate Name                                                  | Number of Draws |
|---------------------------------------|--------|-----------|-------------|------------|-----------|-------|-----------------------------------------------------------------|-----------------|
| Other congenital anomalies            | Male   | 0-6 days  | 65-69 years | Data Rich  | 1         | 3     | Alcohol (liters per capita)                                     | --              |
| Other congenital anomalies            | Male   | 0-6 days  | 65-69 years | Global     | 1         | 1     | Live Births 35+ (proportion)                                    | 405             |
| Other congenital anomalies            | Male   | 0-6 days  | 65-69 years | Global     | 1         | 1     | Maternal alcohol consumption during pregnancy (proportion)      | --              |
| Other congenital anomalies            | Male   | 0-6 days  | 65-69 years | Global     | -1        | 2     | Healthcare access and quality index                             | 274             |
| Other congenital anomalies            | Male   | 0-6 days  | 65-69 years | Global     | -1        | 2     | In-Facility Delivery (proportion)                               | --              |
| Other congenital anomalies            | Male   | 0-6 days  | 65-69 years | Global     | -1        | 2     | Legality of Abortion                                            | --              |
| Other congenital anomalies            | Male   | 0-6 days  | 65-69 years | Global     | 1         | 2     | Smoking Prevalence (Reproductive Age Standardized)              | 274             |
| Other congenital anomalies            | Male   | 0-6 days  | 65-69 years | Global     | 1         | 2     | Indoor Air Pollution (All Cooking Fuels)                        | --              |
| Other congenital anomalies            | Male   | 0-6 days  | 65-69 years | Global     | -1        | 3     | Antenatal Care (4 visits) Coverage (proportion)                 | 65              |
| Other congenital anomalies            | Male   | 0-6 days  | 65-69 years | Global     | -1        | 3     | Maternal Education (years per capita)                           | 161             |
| Other congenital anomalies            | Male   | 0-6 days  | 65-69 years | Global     | -1        | 3     | Socio-demographic Index                                         | 173             |
| Other congenital anomalies            | Male   | 0-6 days  | 65-69 years | Global     | -1        | 3     | Antenatal Care (1 visit) Coverage (proportion)                  | --              |
| Other congenital anomalies            | Male   | 0-6 days  | 65-69 years | Global     | -1        | 3     | LDI (US\$ per capita)                                           | --              |
| Other congenital anomalies            | Male   | 0-6 days  | 65-69 years | Global     | 1         | 3     | Diabetes Age-Standardized Prevalence (proportion)               | 581             |
| Other congenital anomalies            | Male   | 0-6 days  | 65-69 years | Global     | 1         | 3     | Alcohol (liters per capita)                                     | --              |
| Urinary diseases and male infertility | Female | 0-6 days  | 95+ years   | Data Rich  | -1        | 2     | Healthcare access and quality index                             | 0               |
| Urinary diseases and male infertility | Female | 0-6 days  | 95+ years   | Data Rich  | 0         | 2     | Latitude Under 15 (proportion)                                  | 340             |
| Urinary diseases and male infertility | Female | 0-6 days  | 95+ years   | Data Rich  | 0         | 2     | Latitude 30 to 45 (proportion)                                  | 447             |
| Urinary diseases and male infertility | Female | 0-6 days  | 95+ years   | Data Rich  | 0         | 2     | Latitude Over 45 (proportion)                                   | 497             |
| Urinary diseases and male infertility | Female | 0-6 days  | 95+ years   | Data Rich  | 0         | 2     | Latitude 15 to 30 (proportion)                                  | 502             |
| Urinary diseases and male infertility | Female | 0-6 days  | 95+ years   | Data Rich  | 1         | 2     | Mean BMI                                                        | 971             |
| Urinary diseases and male infertility | Female | 0-6 days  | 95+ years   | Data Rich  | -1        | 3     | Education (years per capita)                                    | --              |
| Urinary diseases and male infertility | Female | 0-6 days  | 95+ years   | Data Rich  | -1        | 3     | LDI (US\$ per capita)                                           | --              |
| Urinary diseases and male infertility | Female | 0-6 days  | 95+ years   | Data Rich  | 0         | 3     | Socio-demographic Index                                         | 180             |
| Urinary diseases and male infertility | Female | 0-6 days  | 95+ years   | Global     | -1        | 2     | Healthcare access and quality index                             | 0               |
| Urinary diseases and male infertility | Female | 0-6 days  | 95+ years   | Global     | 0         | 2     | Latitude 15 to 30 (proportion)                                  | 305             |
| Urinary diseases and male infertility | Female | 0-6 days  | 95+ years   | Global     | 0         | 2     | Latitude Over 45 (proportion)                                   | 332             |
| Urinary diseases and male infertility | Female | 0-6 days  | 95+ years   | Global     | 0         | 2     | Latitude Under 15 (proportion)                                  | 508             |
| Urinary diseases and male infertility | Female | 0-6 days  | 95+ years   | Global     | 0         | 2     | Latitude 30 to 45 (proportion)                                  | 557             |
| Urinary diseases and male infertility | Female | 0-6 days  | 95+ years   | Global     | 1         | 2     | Mean BMI                                                        | 996             |
| Urinary diseases and male infertility | Female | 0-6 days  | 95+ years   | Global     | -1        | 3     | Education (years per capita)                                    | 0               |
| Urinary diseases and male infertility | Female | 0-6 days  | 95+ years   | Global     | -1        | 3     | LDI (US\$ per capita)                                           | --              |
| Urinary diseases and male infertility | Female | 0-6 days  | 95+ years   | Global     | 0         | 3     | Socio-demographic Index                                         | 884             |
| Urinary diseases and male infertility | Male   | 0-6 days  | 95+ years   | Data Rich  | -1        | 2     | Healthcare access and quality index                             | 0               |
| Urinary diseases and male infertility | Male   | 0-6 days  | 95+ years   | Data Rich  | 0         | 2     | Latitude Under 15 (proportion)                                  | 258             |
| Urinary diseases and male infertility | Male   | 0-6 days  | 95+ years   | Data Rich  | 0         | 2     | Latitude 15 to 30 (proportion)                                  | 330             |
| Urinary diseases and male infertility | Male   | 0-6 days  | 95+ years   | Data Rich  | 0         | 2     | Latitude Over 45 (proportion)                                   | 344             |
| Urinary diseases and male infertility | Male   | 0-6 days  | 95+ years   | Data Rich  | 0         | 2     | Latitude 30 to 45 (proportion)                                  | 618             |
| Urinary diseases and male infertility | Male   | 0-6 days  | 95+ years   | Data Rich  | 1         | 2     | Mean BMI                                                        | 952             |
| Urinary diseases and male infertility | Male   | 0-6 days  | 95+ years   | Data Rich  | -1        | 3     | Education (years per capita)                                    | 0               |
| Urinary diseases and male infertility | Male   | 0-6 days  | 95+ years   | Data Rich  | -1        | 3     | LDI (US\$ per capita)                                           | --              |
| Urinary diseases and male infertility | Male   | 0-6 days  | 95+ years   | Data Rich  | 0         | 3     | Socio-demographic Index                                         | 86              |
| Urinary diseases and male infertility | Male   | 0-6 days  | 95+ years   | Global     | -1        | 2     | Healthcare access and quality index                             | 507             |
| Urinary diseases and male infertility | Male   | 0-6 days  | 95+ years   | Global     | 0         | 2     | Latitude 30 to 45 (proportion)                                  | 545             |
| Urinary diseases and male infertility | Male   | 0-6 days  | 95+ years   | Global     | 0         | 2     | Latitude Over 45 (proportion)                                   | 549             |
| Urinary diseases and male infertility | Male   | 0-6 days  | 95+ years   | Global     | 0         | 2     | Latitude Under 15 (proportion)                                  | 665             |
| Urinary diseases and male infertility | Male   | 0-6 days  | 95+ years   | Global     | 0         | 2     | Latitude 15 to 30 (proportion)                                  | 673             |
| Urinary diseases and male infertility | Male   | 0-6 days  | 95+ years   | Global     | 1         | 2     | Mean BMI                                                        | 953             |
| Urinary diseases and male infertility | Male   | 0-6 days  | 95+ years   | Global     | -1        | 3     | Education (years per capita)                                    | 0               |
| Urinary diseases and male infertility | Male   | 0-6 days  | 95+ years   | Global     | -1        | 3     | LDI (US\$ per capita)                                           | --              |
| Urinary diseases and male infertility | Male   | 0-6 days  | 95+ years   | Global     | 0         | 3     | Socio-demographic Index                                         | 548             |
| Urinary tract infections              | Female | 0-6 days  | 95+ years   | Data Rich  | 1         | 1     | Sanitation (proportion with access)                             | 1000            |
| Urinary tract infections              | Female | 0-6 days  | 95+ years   | Data Rich  | -1        | 2     | Education (years per capita)                                    | --              |
| Urinary tract infections              | Female | 0-6 days  | 95+ years   | Data Rich  | -1        | 2     | Healthcare access and quality index                             | --              |
| Urinary tract infections              | Female | 0-6 days  | 95+ years   | Data Rich  | -1        | 2     | LDI (US\$ per capita)                                           | --              |
| Urinary tract infections              | Female | 0-6 days  | 95+ years   | Data Rich  | 0         | 3     | Socio-demographic Index                                         | --              |
| Urinary tract infections              | Female | 0-6 days  | 95+ years   | Global     | 1         | 1     | Sanitation (proportion with access)                             | 326             |
| Urinary tract infections              | Female | 0-6 days  | 95+ years   | Global     | -1        | 2     | Healthcare access and quality index                             | 489             |
| Urinary tract infections              | Female | 0-6 days  | 95+ years   | Global     | -1        | 2     | Education (years per capita)                                    | --              |
| Urinary tract infections              | Female | 0-6 days  | 95+ years   | Global     | -1        | 2     | LDI (US\$ per capita)                                           | --              |
| Urinary tract infections              | Female | 0-6 days  | 95+ years   | Global     | 0         | 3     | Socio-demographic Index                                         | 452             |
| Urinary tract infections              | Male   | 0-6 days  | 95+ years   | Data Rich  | 1         | 1     | Sanitation (proportion with access)                             | 1000            |
| Urinary tract infections              | Male   | 0-6 days  | 95+ years   | Data Rich  | -1        | 2     | Education (years per capita)                                    | --              |
| Urinary tract infections              | Male   | 0-6 days  | 95+ years   | Data Rich  | -1        | 2     | Health System Access (capped)                                   | --              |
| Urinary tract infections              | Male   | 0-6 days  | 95+ years   | Data Rich  | -1        | 2     | Healthcare access and quality index                             | --              |
| Urinary tract infections              | Male   | 0-6 days  | 95+ years   | Data Rich  | -1        | 2     | LDI (US\$ per capita)                                           | --              |
| Urinary tract infections              | Male   | 0-6 days  | 95+ years   | Data Rich  | 0         | 3     | Socio-demographic Index                                         | --              |
| Urinary tract infections              | Male   | 0-6 days  | 95+ years   | Global     | 1         | 1     | Sanitation (proportion with access)                             | 326             |
| Urinary tract infections              | Male   | 0-6 days  | 95+ years   | Global     | -1        | 2     | Healthcare access and quality index                             | 489             |
| Urinary tract infections              | Male   | 0-6 days  | 95+ years   | Global     | -1        | 2     | Education (years per capita)                                    | --              |
| Urinary tract infections              | Male   | 0-6 days  | 95+ years   | Global     | -1        | 2     | LDI (US\$ per capita)                                           | --              |
| Urinary tract infections              | Male   | 0-6 days  | 95+ years   | Global     | 0         | 3     | Socio-demographic Index                                         | 452             |
| Urolithiasis                          | Female | 5-9 years | 95+ years   | Data Rich  | 1         | 1     | Healthcare access and quality index                             | 620             |
| Urolithiasis                          | Female | 5-9 years | 95+ years   | Data Rich  | 1         | 1     | 90th percentile climatic temperature in the given country-year. | 683             |
| Urolithiasis                          | Female | 5-9 years | 95+ years   | Data Rich  | -1        | 2     | fruits adjusted(g)                                              | 369             |
| Urolithiasis                          | Female | 5-9 years | 95+ years   | Data Rich  | -1        | 2     | vegetables adjusted(g)                                          | 822             |
| Urolithiasis                          | Female | 5-9 years | 95+ years   | Data Rich  | 1         | 2     | red meats adjusted(g)                                           | 903             |
| Urolithiasis                          | Female | 5-9 years | 95+ years   | Data Rich  | -1        | 3     | Education (years per capita)                                    | 5               |

**Appendix Table 9: CODEm covariates used, level of covariate, and expected direction of covariate by cause, sex, and age**

*Covariates that CODEm did not select during the covariate selection process have no draw counts listed.*

| Cause                  | Sex    | Age Start   | Age End   | Model Type | Direction | Level | Covariate Name                                                  | Number of Draws |
|------------------------|--------|-------------|-----------|------------|-----------|-------|-----------------------------------------------------------------|-----------------|
| Urolithiasis           | Female | 5-9 years   | 95+ years | Data Rich  | -1        | 3     | LDI (IS per capita)                                             | --              |
| Urolithiasis           | Female | 5-9 years   | 95+ years | Data Rich  | 0         | 3     | Socio-demographic Index                                         | 319             |
| Urolithiasis           | Female | 5-9 years   | 95+ years | Global     | 1         | 1     | Healthcare access and quality index                             | 333             |
| Urolithiasis           | Female | 5-9 years   | 95+ years | Global     | 1         | 1     | 90th percentile climatic temperature in the given country-year. | 864             |
| Urolithiasis           | Female | 5-9 years   | 95+ years | Global     | -1        | 2     | fruits adjusted(g)                                              | 466             |
| Urolithiasis           | Female | 5-9 years   | 95+ years | Global     | -1        | 2     | vegetables adjusted(g)                                          | 466             |
| Urolithiasis           | Female | 5-9 years   | 95+ years | Global     | 1         | 2     | red meats adjusted(g)                                           | 466             |
| Urolithiasis           | Female | 5-9 years   | 95+ years | Global     | -1        | 3     | Education (years per capita)                                    | 88              |
| Urolithiasis           | Female | 5-9 years   | 95+ years | Global     | -1        | 3     | LDI (IS per capita)                                             | --              |
| Urolithiasis           | Female | 5-9 years   | 95+ years | Global     | 0         | 3     | Socio-demographic Index                                         | 267             |
| Urolithiasis           | Male   | 5-9 years   | 95+ years | Data Rich  | -1        | 1     | Healthcare access and quality index                             | 267             |
| Urolithiasis           | Male   | 5-9 years   | 95+ years | Data Rich  | 1         | 1     | 90th percentile climatic temperature in the given country-year. | 381             |
| Urolithiasis           | Male   | 5-9 years   | 95+ years | Data Rich  | 1         | 1     | red meats adjusted(g)                                           | 935             |
| Urolithiasis           | Male   | 5-9 years   | 95+ years | Data Rich  | -1        | 2     | fruits adjusted(g)                                              | 18              |
| Urolithiasis           | Male   | 5-9 years   | 95+ years | Data Rich  | -1        | 2     | vegetables adjusted(g)                                          | 398             |
| Urolithiasis           | Male   | 5-9 years   | 95+ years | Data Rich  | -1        | 3     | Education (years per capita)                                    | 0               |
| Urolithiasis           | Male   | 5-9 years   | 95+ years | Data Rich  | -1        | 3     | LDI (IS per capita)                                             | --              |
| Urolithiasis           | Male   | 5-9 years   | 95+ years | Data Rich  | 0         | 3     | Socio-demographic Index                                         | 397             |
| Urolithiasis           | Male   | 5-9 years   | 95+ years | Global     | 1         | 1     | 90th percentile climatic temperature in the given country-year. | 1000            |
| Urolithiasis           | Male   | 5-9 years   | 95+ years | Global     | -1        | 2     | vegetables adjusted(g)                                          | 189             |
| Urolithiasis           | Male   | 5-9 years   | 95+ years | Global     | -1        | 2     | Healthcare access and quality index                             | 414             |
| Urolithiasis           | Male   | 5-9 years   | 95+ years | Global     | -1        | 2     | fruits adjusted(g)                                              | 414             |
| Urolithiasis           | Male   | 5-9 years   | 95+ years | Global     | 1         | 2     | red meats adjusted(g)                                           | 225             |
| Urolithiasis           | Male   | 5-9 years   | 95+ years | Global     | -1        | 3     | Education (years per capita)                                    | 222             |
| Urolithiasis           | Male   | 5-9 years   | 95+ years | Global     | -1        | 3     | LDI (IS per capita)                                             | --              |
| Urolithiasis           | Male   | 5-9 years   | 95+ years | Global     | 0         | 3     | Socio-demographic Index                                         | 283             |
| Other urinary diseases | Female | 0-6 days    | 95+ years | Data Rich  | 1         | 1     | Education (years per capita)                                    | --              |
| Other urinary diseases | Female | 0-6 days    | 95+ years | Data Rich  | 1         | 1     | LDI (IS per capita)                                             | --              |
| Other urinary diseases | Female | 0-6 days    | 95+ years | Data Rich  | 1         | 1     | Mean BMI                                                        | --              |
| Other urinary diseases | Female | 0-6 days    | 95+ years | Data Rich  | -1        | 2     | Healthcare access and quality index                             | 653             |
| Other urinary diseases | Female | 0-6 days    | 95+ years | Data Rich  | 0         | 3     | Socio-demographic Index                                         | 614             |
| Other urinary diseases | Female | 0-6 days    | 95+ years | Global     | 1         | 1     | Education (years per capita)                                    | --              |
| Other urinary diseases | Female | 0-6 days    | 95+ years | Global     | 1         | 1     | LDI (IS per capita)                                             | --              |
| Other urinary diseases | Female | 0-6 days    | 95+ years | Global     | 1         | 1     | Mean BMI                                                        | --              |
| Other urinary diseases | Female | 0-6 days    | 95+ years | Global     | -1        | 2     | Healthcare access and quality index                             | 807             |
| Other urinary diseases | Female | 0-6 days    | 95+ years | Global     | 0         | 3     | Socio-demographic Index                                         | 557             |
| Other urinary diseases | Male   | 0-6 days    | 95+ years | Data Rich  | 1         | 1     | Mean BMI                                                        | --              |
| Other urinary diseases | Male   | 0-6 days    | 95+ years | Data Rich  | -1        | 2     | LDI (IS per capita)                                             | 89              |
| Other urinary diseases | Male   | 0-6 days    | 95+ years | Data Rich  | -1        | 2     | Education (years per capita)                                    | 344             |
| Other urinary diseases | Male   | 0-6 days    | 95+ years | Data Rich  | -1        | 2     | Healthcare access and quality index                             | 453             |
| Other urinary diseases | Male   | 0-6 days    | 95+ years | Data Rich  | 0         | 3     | Socio-demographic Index                                         | 662             |
| Other urinary diseases | Male   | 0-6 days    | 95+ years | Global     | 1         | 1     | Mean BMI                                                        | --              |
| Other urinary diseases | Male   | 0-6 days    | 95+ years | Global     | -1        | 2     | LDI (IS per capita)                                             | 251             |
| Other urinary diseases | Male   | 0-6 days    | 95+ years | Global     | -1        | 2     | Education (years per capita)                                    | 598             |
| Other urinary diseases | Male   | 0-6 days    | 95+ years | Global     | -1        | 2     | Healthcare access and quality index                             | 635             |
| Other urinary diseases | Male   | 0-6 days    | 95+ years | Global     | 0         | 3     | Socio-demographic Index                                         | 435             |
| Gynecological diseases | Female | 15-19 years | 95+ years | Data Rich  | 0         | 1     | Smoking Prevalence                                              | 486             |
| Gynecological diseases | Female | 15-19 years | 95+ years | Data Rich  | -1        | 2     | Skilled Birth Attendance (proportion)                           | 407             |
| Gynecological diseases | Female | 15-19 years | 95+ years | Data Rich  | -1        | 2     | Healthcare access and quality index                             | 514             |
| Gynecological diseases | Female | 15-19 years | 95+ years | Data Rich  | -1        | 2     | Health System Access (capped)                                   | 662             |
| Gynecological diseases | Female | 15-19 years | 95+ years | Data Rich  | 1         | 2     | Total Fertility Rate                                            | 407             |
| Gynecological diseases | Female | 15-19 years | 95+ years | Data Rich  | 1         | 2     | Live Births 35+ (proportion)                                    | --              |
| Gynecological diseases | Female | 15-19 years | 95+ years | Data Rich  | -1        | 3     | Socio-demographic Index                                         | 274             |
| Gynecological diseases | Female | 15-19 years | 95+ years | Data Rich  | -1        | 3     | Education (years per capita)                                    | 418             |
| Gynecological diseases | Female | 15-19 years | 95+ years | Data Rich  | -1        | 3     | LDI (IS per capita)                                             | --              |
| Gynecological diseases | Female | 15-19 years | 95+ years | Global     | 0         | 1     | Smoking Prevalence                                              | 1000            |
| Gynecological diseases | Female | 15-19 years | 95+ years | Global     | -1        | 2     | Skilled Birth Attendance (proportion)                           | 145             |
| Gynecological diseases | Female | 15-19 years | 95+ years | Global     | -1        | 2     | Healthcare access and quality index                             | 307             |
| Gynecological diseases | Female | 15-19 years | 95+ years | Global     | -1        | 2     | Health System Access (capped)                                   | 410             |
| Gynecological diseases | Female | 15-19 years | 95+ years | Global     | 1         | 2     | Total Fertility Rate                                            | 201             |
| Gynecological diseases | Female | 15-19 years | 95+ years | Global     | 1         | 2     | Live Births 35+ (proportion)                                    | --              |
| Gynecological diseases | Female | 15-19 years | 95+ years | Global     | -1        | 3     | Socio-demographic Index                                         | 171             |
| Gynecological diseases | Female | 15-19 years | 95+ years | Global     | -1        | 3     | Education (years per capita)                                    | 379             |
| Gynecological diseases | Female | 15-19 years | 95+ years | Global     | -1        | 3     | LDI (IS per capita)                                             | --              |
| Uterine fibroids       | Female | 15-19 years | 95+ years | Data Rich  | 0         | 1     | Smoking Prevalence                                              | --              |
| Uterine fibroids       | Female | 15-19 years | 95+ years | Data Rich  | -1        | 2     | Skilled Birth Attendance (proportion)                           | 300             |
| Uterine fibroids       | Female | 15-19 years | 95+ years | Data Rich  | -1        | 2     | Health System Access (capped)                                   | 570             |
| Uterine fibroids       | Female | 15-19 years | 95+ years | Data Rich  | -1        | 2     | Healthcare access and quality index                             | --              |
| Uterine fibroids       | Female | 15-19 years | 95+ years | Data Rich  | 1         | 2     | Live Births 35+ (proportion)                                    | --              |
| Uterine fibroids       | Female | 15-19 years | 95+ years | Data Rich  | 1         | 2     | Total Fertility Rate                                            | --              |
| Uterine fibroids       | Female | 15-19 years | 95+ years | Data Rich  | -1        | 3     | Socio-demographic Index                                         | 221             |
| Uterine fibroids       | Female | 15-19 years | 95+ years | Data Rich  | -1        | 3     | Education (years per capita)                                    | 380             |
| Uterine fibroids       | Female | 15-19 years | 95+ years | Data Rich  | -1        | 3     | LDI (IS per capita)                                             | --              |
| Uterine fibroids       | Female | 15-19 years | 95+ years | Global     | 0         | 1     | Smoking Prevalence                                              | 1000            |
| Uterine fibroids       | Female | 15-19 years | 95+ years | Global     | -1        | 2     | Skilled Birth Attendance (proportion)                           | 168             |
| Uterine fibroids       | Female | 15-19 years | 95+ years | Global     | -1        | 2     | Healthcare access and quality index                             | 430             |
| Uterine fibroids       | Female | 15-19 years | 95+ years | Global     | -1        | 2     | Health System Access (capped)                                   | 598             |
| Uterine fibroids       | Female | 15-19 years | 95+ years | Global     | 1         | 2     | Total Fertility Rate                                            | 36              |



**Appendix Table 9: CODEm covariates used, level of covariate, and expected direction of covariate by cause, sex, and age**

*Covariates that CODEm did not select during the covariate selection process have no draw counts listed.*

| Cause                                     | Sex    | Age Start   | Age End     | Model Type | Direction | Level | Covariate Name                        | Number of Draws |
|-------------------------------------------|--------|-------------|-------------|------------|-----------|-------|---------------------------------------|-----------------|
| Uterine fibroids                          | Female | 15-19 years | 95+ years   | Global     | 1         | 2     | Live Births 35+ (proportion)          | --              |
| Uterine fibroids                          | Female | 15-19 years | 95+ years   | Global     | -1        | 3     | LDI (IS per capita)                   | 31              |
| Uterine fibroids                          | Female | 15-19 years | 95+ years   | Global     | -1        | 3     | Socio-demographic Index               | 137             |
| Uterine fibroids                          | Female | 15-19 years | 95+ years   | Global     | -1        | 3     | Education (years per capita)          | 428             |
| Polycystic ovarian syndrome               | Female | 15-19 years | 50-54 years | Data Rich  | 0         | 1     | Smoking Prevalence                    | 454             |
| Polycystic ovarian syndrome               | Female | 15-19 years | 50-54 years | Data Rich  | -1        | 2     | Health System Access (capped)         | --              |
| Polycystic ovarian syndrome               | Female | 15-19 years | 50-54 years | Data Rich  | -1        | 2     | Healthcare access and quality index   | --              |
| Polycystic ovarian syndrome               | Female | 15-19 years | 50-54 years | Data Rich  | -1        | 2     | Skilled Birth Attendance (proportion) | --              |
| Polycystic ovarian syndrome               | Female | 15-19 years | 50-54 years | Data Rich  | 1         | 2     | Live Births 35+ (proportion)          | --              |
| Polycystic ovarian syndrome               | Female | 15-19 years | 50-54 years | Data Rich  | 1         | 2     | Total Fertility Rate                  | --              |
| Polycystic ovarian syndrome               | Female | 15-19 years | 50-54 years | Data Rich  | -1        | 3     | LDI (IS per capita)                   | 546             |
| Polycystic ovarian syndrome               | Female | 15-19 years | 50-54 years | Data Rich  | -1        | 3     | Education (years per capita)          | --              |
| Polycystic ovarian syndrome               | Female | 15-19 years | 50-54 years | Data Rich  | -1        | 3     | Socio-demographic Index               | --              |
| Polycystic ovarian syndrome               | Female | 15-19 years | 50-54 years | Global     | 0         | 1     | Smoking Prevalence                    | 1000            |
| Polycystic ovarian syndrome               | Female | 15-19 years | 50-54 years | Global     | -1        | 2     | Health System Access (capped)         | --              |
| Polycystic ovarian syndrome               | Female | 15-19 years | 50-54 years | Global     | -1        | 2     | Healthcare access and quality index   | --              |
| Polycystic ovarian syndrome               | Female | 15-19 years | 50-54 years | Global     | -1        | 2     | Skilled Birth Attendance (proportion) | --              |
| Polycystic ovarian syndrome               | Female | 15-19 years | 50-54 years | Global     | 1         | 2     | Live Births 35+ (proportion)          | --              |
| Polycystic ovarian syndrome               | Female | 15-19 years | 50-54 years | Global     | 1         | 2     | Total Fertility Rate                  | --              |
| Polycystic ovarian syndrome               | Female | 15-19 years | 50-54 years | Global     | -1        | 3     | Education (years per capita)          | --              |
| Polycystic ovarian syndrome               | Female | 15-19 years | 50-54 years | Global     | -1        | 3     | LDI (IS per capita)                   | --              |
| Polycystic ovarian syndrome               | Female | 15-19 years | 50-54 years | Global     | -1        | 3     | Socio-demographic Index               | --              |
| Endometriosis                             | Female | 15-19 years | 50-54 years | Data Rich  | 0         | 1     | Smoking Prevalence                    | 1000            |
| Endometriosis                             | Female | 15-19 years | 50-54 years | Data Rich  | -1        | 2     | Skilled Birth Attendance (proportion) | 76              |
| Endometriosis                             | Female | 15-19 years | 50-54 years | Data Rich  | -1        | 2     | Healthcare access and quality index   | 559             |
| Endometriosis                             | Female | 15-19 years | 50-54 years | Data Rich  | -1        | 2     | Health System Access (capped)         | --              |
| Endometriosis                             | Female | 15-19 years | 50-54 years | Data Rich  | 1         | 2     | Total Fertility Rate                  | 76              |
| Endometriosis                             | Female | 15-19 years | 50-54 years | Data Rich  | 1         | 2     | Live Births 35+ (proportion)          | --              |
| Endometriosis                             | Female | 15-19 years | 50-54 years | Data Rich  | -1        | 3     | Education (years per capita)          | 193             |
| Endometriosis                             | Female | 15-19 years | 50-54 years | Data Rich  | -1        | 3     | Socio-demographic Index               | 312             |
| Endometriosis                             | Female | 15-19 years | 50-54 years | Data Rich  | -1        | 3     | LDI (IS per capita)                   | 564             |
| Endometriosis                             | Female | 15-19 years | 50-54 years | Global     | 0         | 1     | Smoking Prevalence                    | 1000            |
| Endometriosis                             | Female | 15-19 years | 50-54 years | Global     | -1        | 2     | Health System Access (capped)         | 194             |
| Endometriosis                             | Female | 15-19 years | 50-54 years | Global     | -1        | 2     | Skilled Birth Attendance (proportion) | 210             |
| Endometriosis                             | Female | 15-19 years | 50-54 years | Global     | -1        | 2     | Healthcare access and quality index   | 302             |
| Endometriosis                             | Female | 15-19 years | 50-54 years | Global     | 1         | 2     | Total Fertility Rate                  | 192             |
| Endometriosis                             | Female | 15-19 years | 50-54 years | Global     | 1         | 2     | Live Births 35+ (proportion)          | --              |
| Endometriosis                             | Female | 15-19 years | 50-54 years | Global     | -1        | 3     | Education (years per capita)          | 122             |
| Endometriosis                             | Female | 15-19 years | 50-54 years | Global     | -1        | 3     | Socio-demographic Index               | 218             |
| Endometriosis                             | Female | 15-19 years | 50-54 years | Global     | -1        | 3     | LDI (IS per capita)                   | 311             |
| Genital prolapse                          | Female | 15-19 years | 95+ years   | Data Rich  | 0         | 1     | Smoking Prevalence                    | 1000            |
| Genital prolapse                          | Female | 15-19 years | 95+ years   | Data Rich  | -1        | 2     | Health System Access (capped)         | 161             |
| Genital prolapse                          | Female | 15-19 years | 95+ years   | Data Rich  | -1        | 2     | Healthcare access and quality index   | 397             |
| Genital prolapse                          | Female | 15-19 years | 95+ years   | Data Rich  | -1        | 2     | Skilled Birth Attendance (proportion) | 405             |
| Genital prolapse                          | Female | 15-19 years | 95+ years   | Data Rich  | 1         | 2     | Total Fertility Rate                  | 35              |
| Genital prolapse                          | Female | 15-19 years | 95+ years   | Data Rich  | 1         | 2     | Live Births 35+ (proportion)          | --              |
| Genital prolapse                          | Female | 15-19 years | 95+ years   | Data Rich  | -1        | 3     | LDI (IS per capita)                   | 198             |
| Genital prolapse                          | Female | 15-19 years | 95+ years   | Data Rich  | -1        | 3     | Socio-demographic Index               | 384             |
| Genital prolapse                          | Female | 15-19 years | 95+ years   | Data Rich  | -1        | 3     | Education (years per capita)          | 713             |
| Genital prolapse                          | Female | 15-19 years | 95+ years   | Global     | 0         | 1     | Smoking Prevalence                    | 1000            |
| Genital prolapse                          | Female | 15-19 years | 95+ years   | Global     | -1        | 2     | Skilled Birth Attendance (proportion) | 382             |
| Genital prolapse                          | Female | 15-19 years | 95+ years   | Global     | -1        | 2     | Healthcare access and quality index   | 438             |
| Genital prolapse                          | Female | 15-19 years | 95+ years   | Global     | -1        | 2     | Health System Access (capped)         | 548             |
| Genital prolapse                          | Female | 15-19 years | 95+ years   | Global     | 1         | 2     | Total Fertility Rate                  | 326             |
| Genital prolapse                          | Female | 15-19 years | 95+ years   | Global     | 1         | 2     | Live Births 35+ (proportion)          | --              |
| Genital prolapse                          | Female | 15-19 years | 95+ years   | Global     | -1        | 3     | Socio-demographic Index               | 168             |
| Genital prolapse                          | Female | 15-19 years | 95+ years   | Global     | -1        | 3     | Education (years per capita)          | 304             |
| Genital prolapse                          | Female | 15-19 years | 95+ years   | Global     | -1        | 3     | LDI (IS per capita)                   | 400             |
| Other gynecological diseases              | Female | 15-19 years | 95+ years   | Data Rich  | 0         | 1     | Smoking Prevalence                    | 1000            |
| Other gynecological diseases              | Female | 15-19 years | 95+ years   | Data Rich  | -1        | 2     | Health System Access (capped)         | 113             |
| Other gynecological diseases              | Female | 15-19 years | 95+ years   | Data Rich  | -1        | 2     | Healthcare access and quality index   | 347             |
| Other gynecological diseases              | Female | 15-19 years | 95+ years   | Data Rich  | -1        | 2     | Skilled Birth Attendance (proportion) | 375             |
| Other gynecological diseases              | Female | 15-19 years | 95+ years   | Data Rich  | 1         | 2     | Live Births 35+ (proportion)          | 262             |
| Other gynecological diseases              | Female | 15-19 years | 95+ years   | Data Rich  | 1         | 2     | Total Fertility Rate                  | 375             |
| Other gynecological diseases              | Female | 15-19 years | 95+ years   | Data Rich  | -1        | 3     | LDI (IS per capita)                   | 78              |
| Other gynecological diseases              | Female | 15-19 years | 95+ years   | Data Rich  | -1        | 3     | Education (years per capita)          | 151             |
| Other gynecological diseases              | Female | 15-19 years | 95+ years   | Data Rich  | -1        | 3     | Socio-demographic Index               | 193             |
| Other gynecological diseases              | Female | 15-19 years | 95+ years   | Global     | 0         | 1     | Smoking Prevalence                    | 1000            |
| Other gynecological diseases              | Female | 15-19 years | 95+ years   | Global     | -1        | 2     | Healthcare access and quality index   | 86              |
| Other gynecological diseases              | Female | 15-19 years | 95+ years   | Global     | -1        | 2     | Health System Access (capped)         | 118             |
| Other gynecological diseases              | Female | 15-19 years | 95+ years   | Global     | -1        | 2     | Skilled Birth Attendance (proportion) | 339             |
| Other gynecological diseases              | Female | 15-19 years | 95+ years   | Global     | 1         | 2     | Live Births 35+ (proportion)          | 339             |
| Other gynecological diseases              | Female | 15-19 years | 95+ years   | Global     | 1         | 2     | Total Fertility Rate                  | 457             |
| Other gynecological diseases              | Female | 15-19 years | 95+ years   | Global     | -1        | 3     | LDI (IS per capita)                   | 151             |
| Other gynecological diseases              | Female | 15-19 years | 95+ years   | Global     | -1        | 3     | Education (years per capita)          | 188             |
| Other gynecological diseases              | Female | 15-19 years | 95+ years   | Global     | -1        | 3     | Socio-demographic Index               | 204             |
| Hemoglobinopathies and hemolytic anaemias | Female | 0-6 days    | 95+ years   | Data Rich  | -1        | 2     | Health System Access (capped)         | --              |
| Hemoglobinopathies and hemolytic anaemias | Female | 0-6 days    | 95+ years   | Data Rich  | -1        | 2     | Healthcare access and quality index   | --              |

**Appendix Table 9: CODEm covariates used, level of covariate, and expected direction of covariate by cause, sex, and age**

*Covariates that CODEm did not select during the covariate selection process have no draw counts listed.*

| Cause                                             | Sex    | Age Start | Age End     | Model Type | Direction | Level | Covariate Name                                                               | Number of Draws |
|---------------------------------------------------|--------|-----------|-------------|------------|-----------|-------|------------------------------------------------------------------------------|-----------------|
| Hemoglobinopathies and hemolytic anaemias         | Female | 0-6 days  | 95+ years   | Data Rich  | -1        | 3     | Education (years per capita)                                                 | 1000            |
| Hemoglobinopathies and hemolytic anaemias         | Female | 0-6 days  | 95+ years   | Data Rich  | -1        | 3     | Latitude Over 45 (proportion)                                                | 1000            |
| Hemoglobinopathies and hemolytic anaemias         | Female | 0-6 days  | 95+ years   | Data Rich  | -1        | 3     | Socio-demographic Index                                                      | 1000            |
| Hemoglobinopathies and hemolytic anaemias         | Female | 0-6 days  | 95+ years   | Data Rich  | -1        | 3     | LDI (IS per capita)                                                          | --              |
| Hemoglobinopathies and hemolytic anaemias         | Female | 0-6 days  | 95+ years   | Data Rich  | 0         | 3     | Latitude 30 to 45 (proportion)                                               | 1000            |
| Hemoglobinopathies and hemolytic anaemias         | Female | 0-6 days  | 95+ years   | Data Rich  | 1         | 3     | Latitude 15 to 30 (proportion)                                               | --              |
| Hemoglobinopathies and hemolytic anaemias         | Female | 0-6 days  | 95+ years   | Data Rich  | 1         | 3     | Latitude Under 15 (proportion)                                               | --              |
| Hemoglobinopathies and hemolytic anaemias         | Female | 0-6 days  | 95+ years   | Data Rich  | 1         | 3     | Malaria Lysenko PFPR 1 (Holoendemic)                                         | --              |
| Hemoglobinopathies and hemolytic anaemias         | Female | 0-6 days  | 95+ years   | Global     | 1         | 1     | Hemoglobinopathies Prevalence x Excess Mortality                             | 119             |
| Hemoglobinopathies and hemolytic anaemias         | Female | 0-6 days  | 95+ years   | Global     | 1         | 1     | Hemoglobinopathies Prevalence x Excess Mortality (excluding G6PD deficiency) | 201             |
| Hemoglobinopathies and hemolytic anaemias         | Female | 0-6 days  | 95+ years   | Global     | -1        | 2     | Healthcare access and quality index                                          | 257             |
| Hemoglobinopathies and hemolytic anaemias         | Female | 0-6 days  | 95+ years   | Global     | -1        | 2     | Health System Access (capped)                                                | 654             |
| Hemoglobinopathies and hemolytic anaemias         | Female | 0-6 days  | 95+ years   | Global     | -1        | 3     | Socio-demographic Index                                                      | 221             |
| Hemoglobinopathies and hemolytic anaemias         | Female | 0-6 days  | 95+ years   | Global     | -1        | 3     | Education (years per capita)                                                 | 305             |
| Hemoglobinopathies and hemolytic anaemias         | Female | 0-6 days  | 95+ years   | Global     | -1        | 3     | Latitude Over 45 (proportion)                                                | 374             |
| Hemoglobinopathies and hemolytic anaemias         | Female | 0-6 days  | 95+ years   | Global     | -1        | 3     | LDI (IS per capita)                                                          | --              |
| Hemoglobinopathies and hemolytic anaemias         | Female | 0-6 days  | 95+ years   | Global     | 0         | 3     | Latitude 30 to 45 (proportion)                                               | 633             |
| Hemoglobinopathies and hemolytic anaemias         | Female | 0-6 days  | 95+ years   | Global     | 1         | 3     | Latitude 15 to 30 (proportion)                                               | 173             |
| Hemoglobinopathies and hemolytic anaemias         | Female | 0-6 days  | 95+ years   | Global     | 1         | 3     | Malaria Lysenko PFPR 1 (Holoendemic)                                         | 247             |
| Hemoglobinopathies and hemolytic anaemias         | Female | 0-6 days  | 95+ years   | Global     | 1         | 3     | Latitude Under 15 (proportion)                                               | --              |
| Hemoglobinopathies and hemolytic anaemias         | Male   | 0-6 days  | 95+ years   | Data Rich  | -1        | 2     | Health System Access (capped)                                                | 477             |
| Hemoglobinopathies and hemolytic anaemias         | Male   | 0-6 days  | 95+ years   | Data Rich  | -1        | 2     | Healthcare access and quality index                                          | 613             |
| Hemoglobinopathies and hemolytic anaemias         | Male   | 0-6 days  | 95+ years   | Data Rich  | -1        | 3     | Socio-demographic Index                                                      | 50              |
| Hemoglobinopathies and hemolytic anaemias         | Male   | 0-6 days  | 95+ years   | Data Rich  | -1        | 3     | Education (years per capita)                                                 | 60              |
| Hemoglobinopathies and hemolytic anaemias         | Male   | 0-6 days  | 95+ years   | Data Rich  | -1        | 3     | Latitude Over 45 (proportion)                                                | 445             |
| Hemoglobinopathies and hemolytic anaemias         | Male   | 0-6 days  | 95+ years   | Data Rich  | -1        | 3     | LDI (IS per capita)                                                          | --              |
| Hemoglobinopathies and hemolytic anaemias         | Male   | 0-6 days  | 95+ years   | Data Rich  | 0         | 3     | Latitude 30 to 45 (proportion)                                               | 477             |
| Hemoglobinopathies and hemolytic anaemias         | Male   | 0-6 days  | 95+ years   | Data Rich  | 1         | 3     | Latitude Under 15 (proportion)                                               | 202             |
| Hemoglobinopathies and hemolytic anaemias         | Male   | 0-6 days  | 95+ years   | Data Rich  | 1         | 3     | Latitude 15 to 30 (proportion)                                               | 312             |
| Hemoglobinopathies and hemolytic anaemias         | Male   | 0-6 days  | 95+ years   | Data Rich  | 1         | 3     | Malaria Lysenko PFPR 1 (Holoendemic)                                         | --              |
| Hemoglobinopathies and hemolytic anaemias         | Male   | 0-6 days  | 95+ years   | Global     | 1         | 1     | Hemoglobinopathies Prevalence x Excess Mortality (excluding G6PD deficiency) | 159             |
| Hemoglobinopathies and hemolytic anaemias         | Male   | 0-6 days  | 95+ years   | Global     | 1         | 1     | Hemoglobinopathies Prevalence x Excess Mortality                             | 522             |
| Hemoglobinopathies and hemolytic anaemias         | Male   | 0-6 days  | 95+ years   | Global     | -1        | 2     | Health System Access (capped)                                                | 386             |
| Hemoglobinopathies and hemolytic anaemias         | Male   | 0-6 days  | 95+ years   | Global     | -1        | 2     | Healthcare access and quality index                                          | 386             |
| Hemoglobinopathies and hemolytic anaemias         | Male   | 0-6 days  | 95+ years   | Global     | -1        | 3     | Socio-demographic Index                                                      | 184             |
| Hemoglobinopathies and hemolytic anaemias         | Male   | 0-6 days  | 95+ years   | Global     | -1        | 3     | Education (years per capita)                                                 | 271             |
| Hemoglobinopathies and hemolytic anaemias         | Male   | 0-6 days  | 95+ years   | Global     | -1        | 3     | Latitude Over 45 (proportion)                                                | 692             |
| Hemoglobinopathies and hemolytic anaemias         | Male   | 0-6 days  | 95+ years   | Global     | -1        | 3     | LDI (IS per capita)                                                          | --              |
| Hemoglobinopathies and hemolytic anaemias         | Male   | 0-6 days  | 95+ years   | Global     | 0         | 3     | Latitude 30 to 45 (proportion)                                               | 585             |
| Hemoglobinopathies and hemolytic anaemias         | Male   | 0-6 days  | 95+ years   | Global     | 1         | 3     | Malaria Lysenko PFPR 1 (Holoendemic)                                         | 462             |
| Hemoglobinopathies and hemolytic anaemias         | Male   | 0-6 days  | 95+ years   | Global     | 1         | 3     | Latitude 15 to 30 (proportion)                                               | 654             |
| Hemoglobinopathies and hemolytic anaemias         | Male   | 0-6 days  | 95+ years   | Global     | 1         | 3     | Latitude Under 15 (proportion)                                               | --              |
| Endocrine, metabolic, blood, and immune disorders | Female | 0-6 days  | 95+ years   | Data Rich  | 1         | 1     | Mean BMI                                                                     | --              |
| Endocrine, metabolic, blood, and immune disorders | Female | 0-6 days  | 95+ years   | Data Rich  | -1        | 2     | Healthcare access and quality index                                          | 699             |
| Endocrine, metabolic, blood, and immune disorders | Female | 0-6 days  | 95+ years   | Data Rich  | 1         | 2     | Alcohol (liters per capita)                                                  | --              |
| Endocrine, metabolic, blood, and immune disorders | Female | 0-6 days  | 95+ years   | Data Rich  | 1         | 2     | Cholesterol (total, mean per capita)                                         | --              |
| Endocrine, metabolic, blood, and immune disorders | Female | 0-6 days  | 95+ years   | Data Rich  | -1        | 3     | Education (years per capita)                                                 | --              |
| Endocrine, metabolic, blood, and immune disorders | Female | 0-6 days  | 95+ years   | Data Rich  | -1        | 3     | LDI (IS per capita)                                                          | --              |
| Endocrine, metabolic, blood, and immune disorders | Female | 0-6 days  | 95+ years   | Data Rich  | 0         | 3     | Socio-demographic Index                                                      | 572             |
| Endocrine, metabolic, blood, and immune disorders | Female | 0-6 days  | 95+ years   | Global     | 1         | 1     | Mean BMI                                                                     | --              |
| Endocrine, metabolic, blood, and immune disorders | Female | 0-6 days  | 95+ years   | Global     | -1        | 2     | Healthcare access and quality index                                          | 317             |
| Endocrine, metabolic, blood, and immune disorders | Female | 0-6 days  | 95+ years   | Global     | 1         | 2     | Alcohol (liters per capita)                                                  | --              |
| Endocrine, metabolic, blood, and immune disorders | Female | 0-6 days  | 95+ years   | Global     | 1         | 2     | Cholesterol (total, mean per capita)                                         | --              |
| Endocrine, metabolic, blood, and immune disorders | Female | 0-6 days  | 95+ years   | Global     | -1        | 3     | Education (years per capita)                                                 | 271             |
| Endocrine, metabolic, blood, and immune disorders | Female | 0-6 days  | 95+ years   | Global     | -1        | 3     | LDI (IS per capita)                                                          | --              |
| Endocrine, metabolic, blood, and immune disorders | Female | 0-6 days  | 95+ years   | Global     | 0         | 3     | Socio-demographic Index                                                      | 479             |
| Endocrine, metabolic, blood, and immune disorders | Male   | 0-6 days  | 95+ years   | Data Rich  | 1         | 1     | Mean BMI                                                                     | --              |
| Endocrine, metabolic, blood, and immune disorders | Male   | 0-6 days  | 95+ years   | Data Rich  | -1        | 2     | Healthcare access and quality index                                          | 137             |
| Endocrine, metabolic, blood, and immune disorders | Male   | 0-6 days  | 95+ years   | Data Rich  | 1         | 2     | Cholesterol (total, mean per capita)                                         | 137             |
| Endocrine, metabolic, blood, and immune disorders | Male   | 0-6 days  | 95+ years   | Data Rich  | 1         | 2     | Alcohol (liters per capita)                                                  | --              |
| Endocrine, metabolic, blood, and immune disorders | Male   | 0-6 days  | 95+ years   | Data Rich  | -1        | 3     | Education (years per capita)                                                 | 78              |
| Endocrine, metabolic, blood, and immune disorders | Male   | 0-6 days  | 95+ years   | Data Rich  | -1        | 3     | LDI (IS per capita)                                                          | --              |
| Endocrine, metabolic, blood, and immune disorders | Male   | 0-6 days  | 95+ years   | Data Rich  | 0         | 3     | Socio-demographic Index                                                      | 348             |
| Endocrine, metabolic, blood, and immune disorders | Male   | 0-6 days  | 95+ years   | Global     | 1         | 1     | Mean BMI                                                                     | --              |
| Endocrine, metabolic, blood, and immune disorders | Male   | 0-6 days  | 95+ years   | Global     | -1        | 2     | Healthcare access and quality index                                          | 317             |
| Endocrine, metabolic, blood, and immune disorders | Male   | 0-6 days  | 95+ years   | Global     | 1         | 2     | Alcohol (liters per capita)                                                  | --              |
| Endocrine, metabolic, blood, and immune disorders | Male   | 0-6 days  | 95+ years   | Global     | 1         | 2     | Cholesterol (total, mean per capita)                                         | --              |
| Endocrine, metabolic, blood, and immune disorders | Male   | 0-6 days  | 95+ years   | Global     | -1        | 3     | Education (years per capita)                                                 | 286             |
| Endocrine, metabolic, blood, and immune disorders | Male   | 0-6 days  | 95+ years   | Global     | -1        | 3     | LDI (IS per capita)                                                          | --              |
| Endocrine, metabolic, blood, and immune disorders | Male   | 0-6 days  | 95+ years   | Global     | 0         | 3     | Socio-demographic Index                                                      | 531             |
| Sudden infant death syndrome                      | Female | 7-27 days | 28-364 days | Data Rich  | -1        | 1     | In-Facility Delivery (proportion)                                            | 251             |
| Sudden infant death syndrome                      | Female | 7-27 days | 28-364 days | Data Rich  | 1         | 1     | Tobacco (cigarettes per capita)                                              | 900             |
| Sudden infant death syndrome                      | Female | 7-27 days | 28-364 days | Data Rich  | -1        | 2     | Skilled Birth Attendance (proportion)                                        | 120             |
| Sudden infant death syndrome                      | Female | 7-27 days | 28-364 days | Data Rich  | 1         | 2     | Underweight (proportion <2SD weight for age, <5 years)                       | --              |
| Sudden infant death syndrome                      | Female | 7-27 days | 28-364 days | Data Rich  | -1        | 3     | Education (years per capita)                                                 | 208             |
| Sudden infant death syndrome                      | Female | 7-27 days | 28-364 days | Data Rich  | 0         | 3     | Socio-demographic Index                                                      | 208             |
| Sudden infant death syndrome                      | Female | 7-27 days | 28-364 days | Data Rich  | 0         | 3     | LDI (IS per capita)                                                          | --              |
| Sudden infant death syndrome                      | Female | 7-27 days | 28-364 days | Data Rich  | 1         | 3     | Total Fertility Rate                                                         | --              |

**Appendix Table 9: CODEm covariates used, level of covariate, and expected direction of covariate by cause, sex, and age**

*Covariates that CODEm did not select during the covariate selection process have no draw counts listed.*

| Cause                        | Sex    | Age Start | Age End     | Model Type | Direction | Level | Covariate Name                                         | Number of Draws |
|------------------------------|--------|-----------|-------------|------------|-----------|-------|--------------------------------------------------------|-----------------|
| Sudden infant death syndrome | Female | 7-27 days | 28-364 days | Global     | -1        | 1     | In-Facility Delivery (proportion)                      | 412             |
| Sudden infant death syndrome | Female | 7-27 days | 28-364 days | Global     | 1         | 1     | Tobacco (cigarettes per capita)                        | 689             |
| Sudden infant death syndrome | Female | 7-27 days | 28-364 days | Global     | -1        | 2     | Skilled Birth Attendance (proportion)                  | 240             |
| Sudden infant death syndrome | Female | 7-27 days | 28-364 days | Global     | 1         | 2     | Underweight (proportion <2SD weight for age, <5 years) | --              |
| Sudden infant death syndrome | Female | 7-27 days | 28-364 days | Global     | -1        | 3     | Education (years per capita)                           | 146             |
| Sudden infant death syndrome | Female | 7-27 days | 28-364 days | Global     | 0         | 3     | Socio-demographic Index                                | 146             |
| Sudden infant death syndrome | Female | 7-27 days | 28-364 days | Global     | 0         | 3     | LDI (I\$ per capita)                                   | --              |
| Sudden infant death syndrome | Female | 7-27 days | 28-364 days | Global     | 1         | 3     | Total Fertility Rate                                   | --              |
| Sudden infant death syndrome | Male   | 7-27 days | 28-364 days | Data Rich  | -1        | 1     | In-Facility Delivery (proportion)                      | 40              |
| Sudden infant death syndrome | Male   | 7-27 days | 28-364 days | Data Rich  | 1         | 1     | Tobacco (cigarettes per capita)                        | 960             |
| Sudden infant death syndrome | Male   | 7-27 days | 28-364 days | Data Rich  | -1        | 2     | Healthcare access and quality index                    | 368             |
| Sudden infant death syndrome | Male   | 7-27 days | 28-364 days | Data Rich  | -1        | 2     | Health System Access (capped)                          | --              |
| Sudden infant death syndrome | Male   | 7-27 days | 28-364 days | Data Rich  | -1        | 2     | Skilled Birth Attendance (proportion)                  | --              |
| Sudden infant death syndrome | Male   | 7-27 days | 28-364 days | Data Rich  | 1         | 2     | Underweight (proportion <2SD weight for age, <5 years) | --              |
| Sudden infant death syndrome | Male   | 7-27 days | 28-364 days | Data Rich  | -1        | 3     | Education (years per capita)                           | 433             |
| Sudden infant death syndrome | Male   | 7-27 days | 28-364 days | Data Rich  | 0         | 3     | Socio-demographic Index                                | 242             |
| Sudden infant death syndrome | Male   | 7-27 days | 28-364 days | Data Rich  | 0         | 3     | LDI (I\$ per capita)                                   | --              |
| Sudden infant death syndrome | Male   | 7-27 days | 28-364 days | Data Rich  | 1         | 3     | Total Fertility Rate                                   | --              |
| Sudden infant death syndrome | Male   | 7-27 days | 28-364 days | Global     | -1        | 1     | In-Facility Delivery (proportion)                      | 120             |
| Sudden infant death syndrome | Male   | 7-27 days | 28-364 days | Global     | 1         | 1     | Tobacco (cigarettes per capita)                        | 880             |
| Sudden infant death syndrome | Male   | 7-27 days | 28-364 days | Global     | -1        | 2     | Health System Access (capped)                          | 352             |
| Sudden infant death syndrome | Male   | 7-27 days | 28-364 days | Global     | -1        | 2     | Healthcare access and quality index                    | 352             |
| Sudden infant death syndrome | Male   | 7-27 days | 28-364 days | Global     | -1        | 2     | Skilled Birth Attendance (proportion)                  | --              |
| Sudden infant death syndrome | Male   | 7-27 days | 28-364 days | Global     | 1         | 2     | Underweight (proportion <2SD weight for age, <5 years) | --              |
| Sudden infant death syndrome | Male   | 7-27 days | 28-364 days | Global     | -1        | 3     | Education (years per capita)                           | 212             |
| Sudden infant death syndrome | Male   | 7-27 days | 28-364 days | Global     | 0         | 3     | Socio-demographic Index                                | 116             |
| Sudden infant death syndrome | Male   | 7-27 days | 28-364 days | Global     | 0         | 3     | LDI (I\$ per capita)                                   | --              |
| Sudden infant death syndrome | Male   | 7-27 days | 28-364 days | Global     | 1         | 3     | Total Fertility Rate                                   | --              |
| Transport injuries           | Female | 0-6 days  | 95+ years   | Data Rich  | 1         | 1     | Alcohol (liters per capita)                            | 410             |
| Transport injuries           | Female | 0-6 days  | 95+ years   | Data Rich  | 1         | 1     | Vehicles - 2 wheels fraction (proportion)              | 694             |
| Transport injuries           | Female | 0-6 days  | 95+ years   | Data Rich  | 1         | 1     | Vehicles - 2+4 wheels (per capita)                     | --              |
| Transport injuries           | Female | 0-6 days  | 95+ years   | Data Rich  | -1        | 2     | Healthcare access and quality index                    | 462             |
| Transport injuries           | Female | 0-6 days  | 95+ years   | Data Rich  | 0         | 2     | Population Density (300-500 ppl/sqkm, proportion)      | 462             |
| Transport injuries           | Female | 0-6 days  | 95+ years   | Data Rich  | 0         | 2     | Population Density (500-1000 ppl/sqkm, proportion)     | 462             |
| Transport injuries           | Female | 0-6 days  | 95+ years   | Data Rich  | 0         | 2     | LDI (I\$ per capita)                                   | --              |
| Transport injuries           | Female | 0-6 days  | 95+ years   | Data Rich  | -1        | 3     | Education (years per capita)                           | 149             |
| Transport injuries           | Female | 0-6 days  | 95+ years   | Data Rich  | -1        | 3     | Socio-demographic Index                                | 342             |
| Transport injuries           | Female | 0-6 days  | 95+ years   | Data Rich  | 1         | 3     | Rainfall Quintile 5 (proportion)                       | --              |
| Transport injuries           | Female | 0-6 days  | 95+ years   | Global     | 1         | 1     | Alcohol (liters per capita)                            | 671             |
| Transport injuries           | Female | 0-6 days  | 95+ years   | Global     | 1         | 1     | Vehicles - 2 wheels fraction (proportion)              | 812             |
| Transport injuries           | Female | 0-6 days  | 95+ years   | Global     | 1         | 1     | Vehicles - 2+4 wheels (per capita)                     | --              |
| Transport injuries           | Female | 0-6 days  | 95+ years   | Global     | -1        | 2     | Healthcare access and quality index                    | 323             |
| Transport injuries           | Female | 0-6 days  | 95+ years   | Global     | 0         | 2     | Population Density (300-500 ppl/sqkm, proportion)      | 527             |
| Transport injuries           | Female | 0-6 days  | 95+ years   | Global     | 0         | 2     | Population Density (500-1000 ppl/sqkm, proportion)     | 531             |
| Transport injuries           | Female | 0-6 days  | 95+ years   | Global     | 0         | 2     | LDI (I\$ per capita)                                   | --              |
| Transport injuries           | Female | 0-6 days  | 95+ years   | Global     | -1        | 3     | Socio-demographic Index                                | 294             |
| Transport injuries           | Female | 0-6 days  | 95+ years   | Global     | -1        | 3     | Education (years per capita)                           | 344             |
| Transport injuries           | Female | 0-6 days  | 95+ years   | Global     | 1         | 3     | Rainfall Quintile 5 (proportion)                       | --              |
| Transport injuries           | Male   | 0-6 days  | 95+ years   | Data Rich  | 1         | 1     | Alcohol (liters per capita)                            | 1000            |
| Transport injuries           | Male   | 0-6 days  | 95+ years   | Data Rich  | 1         | 1     | Vehicles - 2 wheels fraction (proportion)              | --              |
| Transport injuries           | Male   | 0-6 days  | 95+ years   | Data Rich  | 1         | 1     | Vehicles - 2+4 wheels (per capita)                     | --              |
| Transport injuries           | Male   | 0-6 days  | 95+ years   | Data Rich  | -1        | 2     | Healthcare access and quality index                    | 466             |
| Transport injuries           | Male   | 0-6 days  | 95+ years   | Data Rich  | 0         | 2     | Population Density (300-500 ppl/sqkm, proportion)      | 373             |
| Transport injuries           | Male   | 0-6 days  | 95+ years   | Data Rich  | 0         | 2     | Population Density (500-1000 ppl/sqkm, proportion)     | 424             |
| Transport injuries           | Male   | 0-6 days  | 95+ years   | Data Rich  | 0         | 2     | LDI (I\$ per capita)                                   | --              |
| Transport injuries           | Male   | 0-6 days  | 95+ years   | Data Rich  | -1        | 3     | Education (years per capita)                           | 385             |
| Transport injuries           | Male   | 0-6 days  | 95+ years   | Data Rich  | -1        | 3     | Socio-demographic Index                                | 437             |
| Transport injuries           | Male   | 0-6 days  | 95+ years   | Data Rich  | 1         | 3     | Rainfall Quintile 5 (proportion)                       | --              |
| Transport injuries           | Male   | 0-6 days  | 95+ years   | Global     | 1         | 1     | Alcohol (liters per capita)                            | 470             |
| Transport injuries           | Male   | 0-6 days  | 95+ years   | Global     | 1         | 1     | Vehicles - 2 wheels fraction (proportion)              | 834             |
| Transport injuries           | Male   | 0-6 days  | 95+ years   | Global     | 1         | 1     | Vehicles - 2+4 wheels (per capita)                     | --              |
| Transport injuries           | Male   | 0-6 days  | 95+ years   | Global     | -1        | 2     | Healthcare access and quality index                    | 535             |
| Transport injuries           | Male   | 0-6 days  | 95+ years   | Global     | 0         | 2     | Population Density (300-500 ppl/sqkm, proportion)      | 352             |
| Transport injuries           | Male   | 0-6 days  | 95+ years   | Global     | 0         | 2     | Population Density (500-1000 ppl/sqkm, proportion)     | 481             |
| Transport injuries           | Male   | 0-6 days  | 95+ years   | Global     | 0         | 2     | LDI (I\$ per capita)                                   | --              |
| Transport injuries           | Male   | 0-6 days  | 95+ years   | Global     | -1        | 3     | Socio-demographic Index                                | 309             |
| Transport injuries           | Male   | 0-6 days  | 95+ years   | Global     | -1        | 3     | Education (years per capita)                           | 338             |
| Transport injuries           | Male   | 0-6 days  | 95+ years   | Global     | 1         | 3     | Rainfall Quintile 5 (proportion)                       | --              |
| Road injuries                | Female | 0-6 days  | 95+ years   | Data Rich  | 1         | 1     | Alcohol (liters per capita)                            | 3               |
| Road injuries                | Female | 0-6 days  | 95+ years   | Data Rich  | 1         | 1     | Log-transformed SEV scalar: Road Inj                   | 366             |
| Road injuries                | Female | 0-6 days  | 95+ years   | Data Rich  | 1         | 1     | Vehicles - 2 wheels fraction (proportion)              | 961             |
| Road injuries                | Female | 0-6 days  | 95+ years   | Data Rich  | 1         | 1     | Vehicles - 2 wheels (per capita)                       | --              |
| Road injuries                | Female | 0-6 days  | 95+ years   | Data Rich  | 1         | 1     | Vehicles - 2+4 wheels (per capita)                     | --              |
| Road injuries                | Female | 0-6 days  | 95+ years   | Data Rich  | 1         | 1     | Vehicles - 4 wheels (per capita)                       | --              |
| Road injuries                | Female | 0-6 days  | 95+ years   | Data Rich  | -1        | 2     | Healthcare access and quality index                    | 240             |
| Road injuries                | Female | 0-6 days  | 95+ years   | Data Rich  | 0         | 2     | Population Density (500-1000 ppl/sqkm, proportion)     | 115             |
| Road injuries                | Female | 0-6 days  | 95+ years   | Data Rich  | 0         | 2     | Population Density (300-500 ppl/sqkm, proportion)      | 240             |
| Road injuries                | Female | 0-6 days  | 95+ years   | Data Rich  | 1         | 2     | Population 15 to 30 (proportion)                       | 240             |

**Appendix Table 9: CODEm covariates used, level of covariate, and expected direction of covariate by cause, sex, and age**

*Covariates that CODEm did not select during the covariate selection process have no draw counts listed.*

| Cause                    | Sex    | Age Start | Age End   | Model Type | Direction | Level | Covariate Name                                     | Number of Draws |
|--------------------------|--------|-----------|-----------|------------|-----------|-------|----------------------------------------------------|-----------------|
| Road injuries            | Female | 0-6 days  | 95+ years | Data Rich  | -1        | 3     | Education (years per capita)                       | 0               |
| Road injuries            | Female | 0-6 days  | 95+ years | Data Rich  | -1        | 3     | Socio-demographic Index                            | 0               |
| Road injuries            | Female | 0-6 days  | 95+ years | Data Rich  | 0         | 3     | LDI (IS per capita)                                | --              |
| Road injuries            | Female | 0-6 days  | 95+ years | Global     | 1         | 1     | Alcohol (liters per capita)                        | 338             |
| Road injuries            | Female | 0-6 days  | 95+ years | Global     | 1         | 1     | Vehicles - 2 wheels fraction (proportion)          | 908             |
| Road injuries            | Female | 0-6 days  | 95+ years | Global     | 1         | 1     | Log-transformed SEV scalar: Road Inj               | --              |
| Road injuries            | Female | 0-6 days  | 95+ years | Global     | 1         | 1     | Vehicles - 2 wheels (per capita)                   | --              |
| Road injuries            | Female | 0-6 days  | 95+ years | Global     | 1         | 1     | Vehicles - 2+4 wheels (per capita)                 | --              |
| Road injuries            | Female | 0-6 days  | 95+ years | Global     | 1         | 1     | Vehicles - 4 wheels (per capita)                   | --              |
| Road injuries            | Female | 0-6 days  | 95+ years | Global     | -1        | 2     | Healthcare access and quality index                | 500             |
| Road injuries            | Female | 0-6 days  | 95+ years | Global     | 0         | 2     | Population Density (300-500 ppl/sqkm, proportion)  | 534             |
| Road injuries            | Female | 0-6 days  | 95+ years | Global     | 0         | 2     | Population Density (500-1000 ppl/sqkm, proportion) | 534             |
| Road injuries            | Female | 0-6 days  | 95+ years | Global     | 1         | 2     | Population 15 to 30 (proportion)                   | 71              |
| Road injuries            | Female | 0-6 days  | 95+ years | Global     | -1        | 3     | Socio-demographic Index                            | 184             |
| Road injuries            | Female | 0-6 days  | 95+ years | Global     | -1        | 3     | Education (years per capita)                       | 242             |
| Road injuries            | Female | 0-6 days  | 95+ years | Global     | 0         | 3     | LDI (IS per capita)                                | --              |
| Road injuries            | Male   | 0-6 days  | 95+ years | Data Rich  | 1         | 1     | Alcohol (liters per capita)                        | 519             |
| Road injuries            | Male   | 0-6 days  | 95+ years | Data Rich  | 1         | 1     | Vehicles - 2 wheels fraction (proportion)          | 866             |
| Road injuries            | Male   | 0-6 days  | 95+ years | Data Rich  | 1         | 1     | Log-transformed SEV scalar: Road Inj               | --              |
| Road injuries            | Male   | 0-6 days  | 95+ years | Data Rich  | 1         | 1     | Vehicles - 2 wheels (per capita)                   | --              |
| Road injuries            | Male   | 0-6 days  | 95+ years | Data Rich  | 1         | 1     | Vehicles - 2+4 wheels (per capita)                 | --              |
| Road injuries            | Male   | 0-6 days  | 95+ years | Data Rich  | 1         | 1     | Vehicles - 4 wheels (per capita)                   | --              |
| Road injuries            | Male   | 0-6 days  | 95+ years | Data Rich  | -1        | 2     | Healthcare access and quality index                | 726             |
| Road injuries            | Male   | 0-6 days  | 95+ years | Data Rich  | 0         | 2     | Population Density (500-1000 ppl/sqkm, proportion) | 68              |
| Road injuries            | Male   | 0-6 days  | 95+ years | Data Rich  | 0         | 2     | Population Density (300-500 ppl/sqkm, proportion)  | 326             |
| Road injuries            | Male   | 0-6 days  | 95+ years | Data Rich  | 1         | 2     | Population 15 to 30 (proportion)                   | 382             |
| Road injuries            | Male   | 0-6 days  | 95+ years | Data Rich  | -1        | 3     | Socio-demographic Index                            | 1               |
| Road injuries            | Male   | 0-6 days  | 95+ years | Data Rich  | -1        | 3     | Education (years per capita)                       | 361             |
| Road injuries            | Male   | 0-6 days  | 95+ years | Data Rich  | 0         | 3     | LDI (IS per capita)                                | --              |
| Road injuries            | Male   | 0-6 days  | 95+ years | Global     | 1         | 1     | Vehicles - 2 wheels fraction (proportion)          | 398             |
| Road injuries            | Male   | 0-6 days  | 95+ years | Global     | 1         | 1     | Alcohol (liters per capita)                        | 963             |
| Road injuries            | Male   | 0-6 days  | 95+ years | Global     | 1         | 1     | Log-transformed SEV scalar: Road Inj               | --              |
| Road injuries            | Male   | 0-6 days  | 95+ years | Global     | 1         | 1     | Vehicles - 2 wheels (per capita)                   | --              |
| Road injuries            | Male   | 0-6 days  | 95+ years | Global     | 1         | 1     | Vehicles - 2+4 wheels (per capita)                 | --              |
| Road injuries            | Male   | 0-6 days  | 95+ years | Global     | 1         | 1     | Vehicles - 4 wheels (per capita)                   | --              |
| Road injuries            | Male   | 0-6 days  | 95+ years | Global     | -1        | 2     | Healthcare access and quality index                | 433             |
| Road injuries            | Male   | 0-6 days  | 95+ years | Global     | 0         | 2     | Population Density (300-500 ppl/sqkm, proportion)  | 549             |
| Road injuries            | Male   | 0-6 days  | 95+ years | Global     | 0         | 2     | Population Density (500-1000 ppl/sqkm, proportion) | 615             |
| Road injuries            | Male   | 0-6 days  | 95+ years | Global     | 1         | 2     | Population 15 to 30 (proportion)                   | 397             |
| Road injuries            | Male   | 0-6 days  | 95+ years | Global     | -1        | 3     | Education (years per capita)                       | 328             |
| Road injuries            | Male   | 0-6 days  | 95+ years | Global     | -1        | 3     | Socio-demographic Index                            | 343             |
| Road injuries            | Male   | 0-6 days  | 95+ years | Global     | 0         | 3     | LDI (IS per capita)                                | --              |
| Pedestrian road injuries | Female | 0-6 days  | 95+ years | Data Rich  | 1         | 1     | Vehicles - 2 wheels fraction (proportion)          | 246             |
| Pedestrian road injuries | Female | 0-6 days  | 95+ years | Data Rich  | 1         | 1     | Alcohol (liters per capita)                        | 298             |
| Pedestrian road injuries | Female | 0-6 days  | 95+ years | Data Rich  | 1         | 1     | Log-transformed SEV scalar: Pedest                 | 702             |
| Pedestrian road injuries | Female | 0-6 days  | 95+ years | Data Rich  | 1         | 1     | Vehicles - 2+4 wheels (per capita)                 | --              |
| Pedestrian road injuries | Female | 0-6 days  | 95+ years | Data Rich  | -1        | 2     | Healthcare access and quality index                | 10              |
| Pedestrian road injuries | Female | 0-6 days  | 95+ years | Data Rich  | 0         | 2     | Population Density (300-500 ppl/sqkm, proportion)  | 10              |
| Pedestrian road injuries | Female | 0-6 days  | 95+ years | Data Rich  | 0         | 2     | Population Density (500-1000 ppl/sqkm, proportion) | 10              |
| Pedestrian road injuries | Female | 0-6 days  | 95+ years | Data Rich  | 0         | 2     | LDI (IS per capita)                                | --              |
| Pedestrian road injuries | Female | 0-6 days  | 95+ years | Data Rich  | -1        | 3     | Socio-demographic Index                            | 24              |
| Pedestrian road injuries | Female | 0-6 days  | 95+ years | Data Rich  | -1        | 3     | Education (years per capita)                       | 976             |
| Pedestrian road injuries | Female | 0-6 days  | 95+ years | Data Rich  | 1         | 3     | Rainfall Quintile 5 (proportion)                   | --              |
| Pedestrian road injuries | Female | 0-6 days  | 95+ years | Global     | 1         | 1     | Log-transformed SEV scalar: Pedest                 | 166             |
| Pedestrian road injuries | Female | 0-6 days  | 95+ years | Global     | 1         | 1     | Vehicles - 2 wheels fraction (proportion)          | 479             |
| Pedestrian road injuries | Female | 0-6 days  | 95+ years | Global     | 1         | 1     | Alcohol (liters per capita)                        | 656             |
| Pedestrian road injuries | Female | 0-6 days  | 95+ years | Global     | 1         | 1     | Vehicles - 2+4 wheels (per capita)                 | --              |
| Pedestrian road injuries | Female | 0-6 days  | 95+ years | Global     | -1        | 2     | Healthcare access and quality index                | 139             |
| Pedestrian road injuries | Female | 0-6 days  | 95+ years | Global     | 0         | 2     | Population Density (300-500 ppl/sqkm, proportion)  | 298             |
| Pedestrian road injuries | Female | 0-6 days  | 95+ years | Global     | 0         | 2     | Population Density (500-1000 ppl/sqkm, proportion) | 440             |
| Pedestrian road injuries | Female | 0-6 days  | 95+ years | Global     | 0         | 2     | LDI (IS per capita)                                | --              |
| Pedestrian road injuries | Female | 0-6 days  | 95+ years | Global     | -1        | 3     | Socio-demographic Index                            | 120             |
| Pedestrian road injuries | Female | 0-6 days  | 95+ years | Global     | -1        | 3     | Education (years per capita)                       | 694             |
| Pedestrian road injuries | Female | 0-6 days  | 95+ years | Global     | 1         | 3     | Rainfall Quintile 5 (proportion)                   | 3               |
| Pedestrian road injuries | Male   | 0-6 days  | 95+ years | Data Rich  | 1         | 1     | Alcohol (liters per capita)                        | 38              |
| Pedestrian road injuries | Male   | 0-6 days  | 95+ years | Data Rich  | 1         | 1     | Log-transformed SEV scalar: Pedest                 | 962             |
| Pedestrian road injuries | Male   | 0-6 days  | 95+ years | Data Rich  | 1         | 1     | Vehicles - 2 wheels fraction (proportion)          | --              |
| Pedestrian road injuries | Male   | 0-6 days  | 95+ years | Data Rich  | 1         | 1     | Vehicles - 2+4 wheels (per capita)                 | --              |
| Pedestrian road injuries | Male   | 0-6 days  | 95+ years | Data Rich  | -1        | 2     | Healthcare access and quality index                | 7               |
| Pedestrian road injuries | Male   | 0-6 days  | 95+ years | Data Rich  | 0         | 2     | Population Density (500-1000 ppl/sqkm, proportion) | 0               |
| Pedestrian road injuries | Male   | 0-6 days  | 95+ years | Data Rich  | 0         | 2     | Population Density (300-500 ppl/sqkm, proportion)  | 808             |
| Pedestrian road injuries | Male   | 0-6 days  | 95+ years | Data Rich  | 0         | 2     | LDI (IS per capita)                                | --              |
| Pedestrian road injuries | Male   | 0-6 days  | 95+ years | Data Rich  | -1        | 3     | Socio-demographic Index                            | 834             |
| Pedestrian road injuries | Male   | 0-6 days  | 95+ years | Data Rich  | -1        | 3     | Education (years per capita)                       | 999             |
| Pedestrian road injuries | Male   | 0-6 days  | 95+ years | Data Rich  | 1         | 3     | Rainfall Quintile 5 (proportion)                   | --              |
| Pedestrian road injuries | Male   | 0-6 days  | 95+ years | Global     | 1         | 1     | Vehicles - 2 wheels fraction (proportion)          | 465             |
| Pedestrian road injuries | Male   | 0-6 days  | 95+ years | Global     | 1         | 1     | Alcohol (liters per capita)                        | 928             |
| Pedestrian road injuries | Male   | 0-6 days  | 95+ years | Global     | 1         | 1     | Log-transformed SEV scalar: Pedest                 | --              |

**Appendix Table 9: CODEm covariates used, level of covariate, and expected direction of covariate by cause, sex, and age**  
*Covariates that CODEm did not select during the covariate selection process have no draw counts listed.*

| Cause                      | Sex    | Age Start | Age End   | Model Type | Direction | Level | Covariate Name                                     | Number of Draws |
|----------------------------|--------|-----------|-----------|------------|-----------|-------|----------------------------------------------------|-----------------|
| Pedestrian road injuries   | Male   | 0-6 days  | 95+ years | Global     | 1         | 1     | Vehicles - 2+4 wheels (per capita)                 | --              |
| Pedestrian road injuries   | Male   | 0-6 days  | 95+ years | Global     | -1        | 2     | Healthcare access and quality index                | 578             |
| Pedestrian road injuries   | Male   | 0-6 days  | 95+ years | Global     | 0         | 2     | Population Density (500-1000 ppl/sqkm, proportion) | 425             |
| Pedestrian road injuries   | Male   | 0-6 days  | 95+ years | Global     | 0         | 2     | Population Density (300-500 ppl/sqkm, proportion)  | 476             |
| Pedestrian road injuries   | Male   | 0-6 days  | 95+ years | Global     | 0         | 2     | LDI (1\$ per capita)                               | --              |
| Pedestrian road injuries   | Male   | 0-6 days  | 95+ years | Global     | -1        | 3     | Socio-demographic Index                            | 384             |
| Pedestrian road injuries   | Male   | 0-6 days  | 95+ years | Global     | -1        | 3     | Education (years per capita)                       | 525             |
| Pedestrian road injuries   | Male   | 0-6 days  | 95+ years | Global     | 1         | 3     | Rainfall Quintile 5 (proportion)                   | --              |
| Cyclist road injuries      | Female | 1-4 years | 95+ years | Data Rich  | 1         | 1     | Log-transformed SEV scalar: Cyclist                | 57              |
| Cyclist road injuries      | Female | 1-4 years | 95+ years | Data Rich  | 1         | 1     | Vehicles - 2+4 wheels (per capita)                 | 251             |
| Cyclist road injuries      | Female | 1-4 years | 95+ years | Data Rich  | 1         | 1     | Vehicles - 2 wheels fraction (proportion)          | 385             |
| Cyclist road injuries      | Female | 1-4 years | 95+ years | Data Rich  | 1         | 1     | Alcohol (liters per capita)                        | 773             |
| Cyclist road injuries      | Female | 1-4 years | 95+ years | Data Rich  | -1        | 2     | Healthcare access and quality index                | 0               |
| Cyclist road injuries      | Female | 1-4 years | 95+ years | Data Rich  | 0         | 2     | Population Density (300-500 ppl/sqkm, proportion)  | 179             |
| Cyclist road injuries      | Female | 1-4 years | 95+ years | Data Rich  | 0         | 2     | Population Density (500-1000 ppl/sqkm, proportion) | 179             |
| Cyclist road injuries      | Female | 1-4 years | 95+ years | Data Rich  | 0         | 2     | LDI (1\$ per capita)                               | --              |
| Cyclist road injuries      | Female | 1-4 years | 95+ years | Data Rich  | -1        | 3     | Education (years per capita)                       | 0               |
| Cyclist road injuries      | Female | 1-4 years | 95+ years | Data Rich  | 0         | 3     | Socio-demographic Index                            | 714             |
| Cyclist road injuries      | Female | 1-4 years | 95+ years | Global     | 1         | 1     | Vehicles - 2+4 wheels (per capita)                 | 267             |
| Cyclist road injuries      | Female | 1-4 years | 95+ years | Global     | 1         | 1     | Alcohol (liters per capita)                        | 684             |
| Cyclist road injuries      | Female | 1-4 years | 95+ years | Global     | 1         | 1     | Vehicles - 2 wheels fraction (proportion)          | 745             |
| Cyclist road injuries      | Female | 1-4 years | 95+ years | Global     | 1         | 1     | Log-transformed SEV scalar: Cyclist                | --              |
| Cyclist road injuries      | Female | 1-4 years | 95+ years | Global     | -1        | 2     | Healthcare access and quality index                | 74              |
| Cyclist road injuries      | Female | 1-4 years | 95+ years | Global     | 0         | 2     | Population Density (500-1000 ppl/sqkm, proportion) | 376             |
| Cyclist road injuries      | Female | 1-4 years | 95+ years | Global     | 0         | 2     | Population Density (300-500 ppl/sqkm, proportion)  | 468             |
| Cyclist road injuries      | Female | 1-4 years | 95+ years | Global     | 0         | 2     | LDI (1\$ per capita)                               | --              |
| Cyclist road injuries      | Female | 1-4 years | 95+ years | Global     | -1        | 3     | Education (years per capita)                       | 42              |
| Cyclist road injuries      | Female | 1-4 years | 95+ years | Global     | 0         | 3     | Socio-demographic Index                            | 475             |
| Cyclist road injuries      | Male   | 1-4 years | 95+ years | Data Rich  | 1         | 1     | Vehicles - 2+4 wheels (per capita)                 | 0               |
| Cyclist road injuries      | Male   | 1-4 years | 95+ years | Data Rich  | 1         | 1     | Vehicles - 2 wheels fraction (proportion)          | 191             |
| Cyclist road injuries      | Male   | 1-4 years | 95+ years | Data Rich  | 1         | 1     | Alcohol (liters per capita)                        | 1000            |
| Cyclist road injuries      | Male   | 1-4 years | 95+ years | Data Rich  | 1         | 1     | Log-transformed SEV scalar: Cyclist                | --              |
| Cyclist road injuries      | Male   | 1-4 years | 95+ years | Data Rich  | -1        | 2     | Healthcare access and quality index                | 0               |
| Cyclist road injuries      | Male   | 1-4 years | 95+ years | Data Rich  | 0         | 2     | Population Density (300-500 ppl/sqkm, proportion)  | 803             |
| Cyclist road injuries      | Male   | 1-4 years | 95+ years | Data Rich  | 0         | 2     | Population Density (500-1000 ppl/sqkm, proportion) | 962             |
| Cyclist road injuries      | Male   | 1-4 years | 95+ years | Data Rich  | 0         | 2     | LDI (1\$ per capita)                               | --              |
| Cyclist road injuries      | Male   | 1-4 years | 95+ years | Data Rich  | -1        | 3     | Education (years per capita)                       | 0               |
| Cyclist road injuries      | Male   | 1-4 years | 95+ years | Data Rich  | 0         | 3     | Socio-demographic Index                            | 999             |
| Cyclist road injuries      | Male   | 1-4 years | 95+ years | Global     | 1         | 1     | Vehicles - 2+4 wheels (per capita)                 | 246             |
| Cyclist road injuries      | Male   | 1-4 years | 95+ years | Global     | 1         | 1     | Vehicles - 2 wheels fraction (proportion)          | 575             |
| Cyclist road injuries      | Male   | 1-4 years | 95+ years | Global     | 1         | 1     | Alcohol (liters per capita)                        | 682             |
| Cyclist road injuries      | Male   | 1-4 years | 95+ years | Global     | 1         | 1     | Log-transformed SEV scalar: Cyclist                | --              |
| Cyclist road injuries      | Male   | 1-4 years | 95+ years | Global     | -1        | 2     | Healthcare access and quality index                | 110             |
| Cyclist road injuries      | Male   | 1-4 years | 95+ years | Global     | 0         | 2     | Population Density (500-1000 ppl/sqkm, proportion) | 524             |
| Cyclist road injuries      | Male   | 1-4 years | 95+ years | Global     | 0         | 2     | Population Density (300-500 ppl/sqkm, proportion)  | 559             |
| Cyclist road injuries      | Male   | 1-4 years | 95+ years | Global     | 0         | 2     | LDI (1\$ per capita)                               | --              |
| Cyclist road injuries      | Male   | 1-4 years | 95+ years | Global     | -1        | 3     | Education (years per capita)                       | 32              |
| Cyclist road injuries      | Male   | 1-4 years | 95+ years | Global     | 0         | 3     | Socio-demographic Index                            | 438             |
| Motorcyclist road injuries | Female | 0-6 days  | 95+ years | Data Rich  | 1         | 1     | Alcohol (liters per capita)                        | 1000            |
| Motorcyclist road injuries | Female | 0-6 days  | 95+ years | Data Rich  | 1         | 1     | Log-transformed SEV scalar: Mot Cyc                | --              |
| Motorcyclist road injuries | Female | 0-6 days  | 95+ years | Data Rich  | 1         | 1     | Vehicles - 2 wheels (per capita)                   | --              |
| Motorcyclist road injuries | Female | 0-6 days  | 95+ years | Data Rich  | -1        | 2     | Healthcare access and quality index                | 8               |
| Motorcyclist road injuries | Female | 0-6 days  | 95+ years | Data Rich  | 0         | 2     | Population Density (300-500 ppl/sqkm, proportion)  | 344             |
| Motorcyclist road injuries | Female | 0-6 days  | 95+ years | Data Rich  | 0         | 2     | Population Density (500-1000 ppl/sqkm, proportion) | 851             |
| Motorcyclist road injuries | Female | 0-6 days  | 95+ years | Data Rich  | 0         | 2     | LDI (1\$ per capita)                               | --              |
| Motorcyclist road injuries | Female | 0-6 days  | 95+ years | Data Rich  | -1        | 3     | Education (years per capita)                       | 998             |
| Motorcyclist road injuries | Female | 0-6 days  | 95+ years | Data Rich  | 0         | 3     | Socio-demographic Index                            | 17              |
| Motorcyclist road injuries | Female | 0-6 days  | 95+ years | Data Rich  | 1         | 3     | Rainfall Quintile 5 (proportion)                   | --              |
| Motorcyclist road injuries | Female | 0-6 days  | 95+ years | Global     | 1         | 1     | Alcohol (liters per capita)                        | 426             |
| Motorcyclist road injuries | Female | 0-6 days  | 95+ years | Global     | 1         | 1     | Log-transformed SEV scalar: Mot Cyc                | --              |
| Motorcyclist road injuries | Female | 0-6 days  | 95+ years | Global     | 1         | 1     | Vehicles - 2 wheels (per capita)                   | --              |
| Motorcyclist road injuries | Female | 0-6 days  | 95+ years | Global     | -1        | 2     | Healthcare access and quality index                | 486             |
| Motorcyclist road injuries | Female | 0-6 days  | 95+ years | Global     | 0         | 2     | Population Density (500-1000 ppl/sqkm, proportion) | 288             |
| Motorcyclist road injuries | Female | 0-6 days  | 95+ years | Global     | 0         | 2     | Population Density (300-500 ppl/sqkm, proportion)  | 450             |
| Motorcyclist road injuries | Female | 0-6 days  | 95+ years | Global     | 0         | 2     | LDI (1\$ per capita)                               | --              |
| Motorcyclist road injuries | Female | 0-6 days  | 95+ years | Global     | -1        | 3     | Education (years per capita)                       | 596             |
| Motorcyclist road injuries | Female | 0-6 days  | 95+ years | Global     | 0         | 3     | Socio-demographic Index                            | 297             |
| Motorcyclist road injuries | Female | 0-6 days  | 95+ years | Global     | 1         | 3     | Rainfall Quintile 5 (proportion)                   | --              |
| Motorcyclist road injuries | Male   | 0-6 days  | 95+ years | Data Rich  | 1         | 1     | Alcohol (liters per capita)                        | 1000            |
| Motorcyclist road injuries | Male   | 0-6 days  | 95+ years | Data Rich  | 1         | 1     | Log-transformed SEV scalar: Mot Cyc                | --              |
| Motorcyclist road injuries | Male   | 0-6 days  | 95+ years | Data Rich  | 1         | 1     | Vehicles - 2 wheels (per capita)                   | --              |
| Motorcyclist road injuries | Male   | 0-6 days  | 95+ years | Data Rich  | -1        | 2     | Healthcare access and quality index                | 1               |
| Motorcyclist road injuries | Male   | 0-6 days  | 95+ years | Data Rich  | 0         | 2     | Population Density (300-500 ppl/sqkm, proportion)  | 0               |
| Motorcyclist road injuries | Male   | 0-6 days  | 95+ years | Data Rich  | 0         | 2     | Population Density (500-1000 ppl/sqkm, proportion) | 161             |
| Motorcyclist road injuries | Male   | 0-6 days  | 95+ years | Data Rich  | 0         | 2     | LDI (1\$ per capita)                               | --              |
| Motorcyclist road injuries | Male   | 0-6 days  | 95+ years | Data Rich  | -1        | 3     | Education (years per capita)                       | 32              |
| Motorcyclist road injuries | Male   | 0-6 days  | 95+ years | Data Rich  | 0         | 3     | Socio-demographic Index                            | 801             |
| Motorcyclist road injuries | Male   | 0-6 days  | 95+ years | Data Rich  | 1         | 3     | Rainfall Quintile 5 (proportion)                   | --              |

**Appendix Table 9: CODEm covariates used, level of covariate, and expected direction of covariate by cause, sex, and age**  
*Covariates that CODEm did not select during the covariate selection process have no draw counts listed.*

| Cause                       | Sex    | Age Start | Age End   | Model Type | Direction | Level | Covariate Name                                     | Number of Draws |
|-----------------------------|--------|-----------|-----------|------------|-----------|-------|----------------------------------------------------|-----------------|
| Motorcyclist road injuries  | Male   | 0-6 days  | 95+ years | Global     | 1         | 1     | Alcohol (liters per capita)                        | 1000            |
| Motorcyclist road injuries  | Male   | 0-6 days  | 95+ years | Global     | 1         | 1     | Log-transformed SEV scalar: Mot Cyc                | --              |
| Motorcyclist road injuries  | Male   | 0-6 days  | 95+ years | Global     | 1         | 1     | Vehicles - 2 wheels (per capita)                   | --              |
| Motorcyclist road injuries  | Male   | 0-6 days  | 95+ years | Global     | -1        | 2     | Healthcare access and quality index                | 266             |
| Motorcyclist road injuries  | Male   | 0-6 days  | 95+ years | Global     | 0         | 2     | Population Density (300-500 ppl/sqkm, proportion)  | 615             |
| Motorcyclist road injuries  | Male   | 0-6 days  | 95+ years | Global     | 0         | 2     | Population Density (500-1000 ppl/sqkm, proportion) | 615             |
| Motorcyclist road injuries  | Male   | 0-6 days  | 95+ years | Global     | 0         | 2     | LDI (IS per capita)                                | --              |
| Motorcyclist road injuries  | Male   | 0-6 days  | 95+ years | Global     | -1        | 3     | Education (years per capita)                       | 328             |
| Motorcyclist road injuries  | Male   | 0-6 days  | 95+ years | Global     | 0         | 3     | Socio-demographic Index                            | 180             |
| Motorcyclist road injuries  | Male   | 0-6 days  | 95+ years | Global     | 1         | 3     | Rainfall Quintile 5 (proportion)                   | --              |
| Motor vehicle road injuries | Female | 0-6 days  | 95+ years | Data Rich  | 1         | 1     | Alcohol (liters per capita)                        | 1000            |
| Motor vehicle road injuries | Female | 0-6 days  | 95+ years | Data Rich  | 1         | 1     | Log-transformed SEV scalar: Mot Veh                | --              |
| Motor vehicle road injuries | Female | 0-6 days  | 95+ years | Data Rich  | 1         | 1     | Vehicles - 4 wheels (per capita)                   | --              |
| Motor vehicle road injuries | Female | 0-6 days  | 95+ years | Data Rich  | -1        | 2     | Healthcare access and quality index                | 57              |
| Motor vehicle road injuries | Female | 0-6 days  | 95+ years | Data Rich  | 0         | 2     | Population Density (300-500 ppl/sqkm, proportion)  | 471             |
| Motor vehicle road injuries | Female | 0-6 days  | 95+ years | Data Rich  | 0         | 2     | Population Density (500-1000 ppl/sqkm, proportion) | 471             |
| Motor vehicle road injuries | Female | 0-6 days  | 95+ years | Data Rich  | 0         | 3     | Education (years per capita)                       | 609             |
| Motor vehicle road injuries | Female | 0-6 days  | 95+ years | Data Rich  | 0         | 3     | Socio-demographic Index                            | 762             |
| Motor vehicle road injuries | Female | 0-6 days  | 95+ years | Data Rich  | 0         | 3     | LDI (IS per capita)                                | --              |
| Motor vehicle road injuries | Female | 0-6 days  | 95+ years | Data Rich  | 1         | 3     | Rainfall Quintile 5 (proportion)                   | --              |
| Motor vehicle road injuries | Female | 0-6 days  | 95+ years | Global     | 1         | 1     | Alcohol (liters per capita)                        | 1000            |
| Motor vehicle road injuries | Female | 0-6 days  | 95+ years | Global     | 1         | 1     | Log-transformed SEV scalar: Mot Veh                | --              |
| Motor vehicle road injuries | Female | 0-6 days  | 95+ years | Global     | 1         | 1     | Vehicles - 4 wheels (per capita)                   | --              |
| Motor vehicle road injuries | Female | 0-6 days  | 95+ years | Global     | -1        | 2     | Healthcare access and quality index                | 199             |
| Motor vehicle road injuries | Female | 0-6 days  | 95+ years | Global     | 0         | 2     | Population Density (300-500 ppl/sqkm, proportion)  | 665             |
| Motor vehicle road injuries | Female | 0-6 days  | 95+ years | Global     | 0         | 2     | Population Density (500-1000 ppl/sqkm, proportion) | 665             |
| Motor vehicle road injuries | Female | 0-6 days  | 95+ years | Global     | 0         | 3     | Socio-demographic Index                            | 399             |
| Motor vehicle road injuries | Female | 0-6 days  | 95+ years | Global     | 0         | 3     | Education (years per capita)                       | 477             |
| Motor vehicle road injuries | Female | 0-6 days  | 95+ years | Global     | 0         | 3     | LDI (IS per capita)                                | --              |
| Motor vehicle road injuries | Female | 0-6 days  | 95+ years | Global     | 1         | 3     | Rainfall Quintile 5 (proportion)                   | --              |
| Motor vehicle road injuries | Male   | 0-6 days  | 95+ years | Data Rich  | 1         | 1     | Alcohol (liters per capita)                        | 766             |
| Motor vehicle road injuries | Male   | 0-6 days  | 95+ years | Data Rich  | 1         | 1     | Log-transformed SEV scalar: Mot Veh                | --              |
| Motor vehicle road injuries | Male   | 0-6 days  | 95+ years | Data Rich  | 1         | 1     | Vehicles - 4 wheels (per capita)                   | --              |
| Motor vehicle road injuries | Male   | 0-6 days  | 95+ years | Data Rich  | -1        | 2     | Healthcare access and quality index                | 219             |
| Motor vehicle road injuries | Male   | 0-6 days  | 95+ years | Data Rich  | 0         | 2     | Population Density (300-500 ppl/sqkm, proportion)  | --              |
| Motor vehicle road injuries | Male   | 0-6 days  | 95+ years | Data Rich  | 0         | 2     | Population Density (500-1000 ppl/sqkm, proportion) | --              |
| Motor vehicle road injuries | Male   | 0-6 days  | 95+ years | Data Rich  | 0         | 3     | Education (years per capita)                       | 304             |
| Motor vehicle road injuries | Male   | 0-6 days  | 95+ years | Data Rich  | 0         | 3     | Socio-demographic Index                            | 382             |
| Motor vehicle road injuries | Male   | 0-6 days  | 95+ years | Data Rich  | 0         | 3     | LDI (IS per capita)                                | --              |
| Motor vehicle road injuries | Male   | 0-6 days  | 95+ years | Data Rich  | 1         | 3     | Rainfall Quintile 5 (proportion)                   | --              |
| Motor vehicle road injuries | Male   | 0-6 days  | 95+ years | Global     | 1         | 1     | Alcohol (liters per capita)                        | 353             |
| Motor vehicle road injuries | Male   | 0-6 days  | 95+ years | Global     | 1         | 1     | Log-transformed SEV scalar: Mot Veh                | --              |
| Motor vehicle road injuries | Male   | 0-6 days  | 95+ years | Global     | 1         | 1     | Vehicles - 4 wheels (per capita)                   | --              |
| Motor vehicle road injuries | Male   | 0-6 days  | 95+ years | Global     | -1        | 2     | Healthcare access and quality index                | 242             |
| Motor vehicle road injuries | Male   | 0-6 days  | 95+ years | Global     | 0         | 2     | Population Density (300-500 ppl/sqkm, proportion)  | 770             |
| Motor vehicle road injuries | Male   | 0-6 days  | 95+ years | Global     | 0         | 2     | Population Density (500-1000 ppl/sqkm, proportion) | 770             |
| Motor vehicle road injuries | Male   | 0-6 days  | 95+ years | Global     | 0         | 3     | Education (years per capita)                       | 432             |
| Motor vehicle road injuries | Male   | 0-6 days  | 95+ years | Global     | 0         | 3     | Socio-demographic Index                            | 571             |
| Motor vehicle road injuries | Male   | 0-6 days  | 95+ years | Global     | 0         | 3     | LDI (IS per capita)                                | --              |
| Motor vehicle road injuries | Male   | 0-6 days  | 95+ years | Global     | 1         | 3     | Rainfall Quintile 5 (proportion)                   | --              |
| Other road injuries         | Female | 0-6 days  | 95+ years | Data Rich  | 1         | 1     | Vehicles - 2 wheels fraction (proportion)          | 1000            |
| Other road injuries         | Female | 0-6 days  | 95+ years | Data Rich  | 1         | 1     | Alcohol (liters per capita)                        | --              |
| Other road injuries         | Female | 0-6 days  | 95+ years | Data Rich  | 1         | 1     | Log-transformed SEV scalar: Oth Road               | --              |
| Other road injuries         | Female | 0-6 days  | 95+ years | Data Rich  | 1         | 1     | Vehicles - 2+4 wheels (per capita)                 | --              |
| Other road injuries         | Female | 0-6 days  | 95+ years | Data Rich  | -1        | 2     | Healthcare access and quality index                | 1               |
| Other road injuries         | Female | 0-6 days  | 95+ years | Data Rich  | 0         | 2     | LDI (IS per capita)                                | --              |
| Other road injuries         | Female | 0-6 days  | 95+ years | Data Rich  | -1        | 3     | Socio-demographic Index                            | 166             |
| Other road injuries         | Female | 0-6 days  | 95+ years | Data Rich  | 1         | 3     | Rainfall Quintile 5 (proportion)                   | --              |
| Other road injuries         | Female | 0-6 days  | 95+ years | Global     | 1         | 1     | Vehicles - 2 wheels fraction (proportion)          | 1000            |
| Other road injuries         | Female | 0-6 days  | 95+ years | Global     | 1         | 1     | Alcohol (liters per capita)                        | --              |
| Other road injuries         | Female | 0-6 days  | 95+ years | Global     | 1         | 1     | Log-transformed SEV scalar: Oth Road               | --              |
| Other road injuries         | Female | 0-6 days  | 95+ years | Global     | 1         | 1     | Vehicles - 2+4 wheels (per capita)                 | --              |
| Other road injuries         | Female | 0-6 days  | 95+ years | Global     | -1        | 2     | Healthcare access and quality index                | 161             |
| Other road injuries         | Female | 0-6 days  | 95+ years | Global     | 0         | 2     | LDI (IS per capita)                                | --              |
| Other road injuries         | Female | 0-6 days  | 95+ years | Global     | -1        | 3     | Socio-demographic Index                            | 193             |
| Other road injuries         | Female | 0-6 days  | 95+ years | Global     | 1         | 3     | Rainfall Quintile 5 (proportion)                   | --              |
| Other road injuries         | Male   | 0-6 days  | 95+ years | Data Rich  | 1         | 1     | Vehicles - 2 wheels fraction (proportion)          | 6               |
| Other road injuries         | Male   | 0-6 days  | 95+ years | Data Rich  | 1         | 1     | Alcohol (liters per capita)                        | --              |
| Other road injuries         | Male   | 0-6 days  | 95+ years | Data Rich  | 1         | 1     | Log-transformed SEV scalar: Oth Road               | --              |
| Other road injuries         | Male   | 0-6 days  | 95+ years | Data Rich  | 1         | 1     | Vehicles - 2+4 wheels (per capita)                 | --              |
| Other road injuries         | Male   | 0-6 days  | 95+ years | Data Rich  | -1        | 2     | Healthcare access and quality index                | 1               |
| Other road injuries         | Male   | 0-6 days  | 95+ years | Data Rich  | 0         | 2     | LDI (IS per capita)                                | --              |
| Other road injuries         | Male   | 0-6 days  | 95+ years | Data Rich  | -1        | 3     | Socio-demographic Index                            | 967             |
| Other road injuries         | Male   | 0-6 days  | 95+ years | Data Rich  | 1         | 3     | Rainfall Quintile 5 (proportion)                   | --              |
| Other road injuries         | Male   | 0-6 days  | 95+ years | Global     | 1         | 1     | Vehicles - 2 wheels fraction (proportion)          | 294             |
| Other road injuries         | Male   | 0-6 days  | 95+ years | Global     | 1         | 1     | Alcohol (liters per capita)                        | --              |
| Other road injuries         | Male   | 0-6 days  | 95+ years | Global     | 1         | 1     | Log-transformed SEV scalar: Oth Road               | --              |
| Other road injuries         | Male   | 0-6 days  | 95+ years | Global     | 1         | 1     | Vehicles - 2+4 wheels (per capita)                 | --              |



**Appendix Table 9: CODEm covariates used, level of covariate, and expected direction of covariate by cause, sex, and age**

*Covariates that CODEm did not select during the covariate selection process have no draw counts listed.*

| Cause                    | Sex    | Age Start   | Age End   | Model Type | Direction | Level | Covariate Name                                         | Number of Draws |
|--------------------------|--------|-------------|-----------|------------|-----------|-------|--------------------------------------------------------|-----------------|
| Other road injuries      | Male   | 0-6 days    | 95+ years | Global     | -1        | 2     | Healthcare access and quality index                    | --              |
| Other road injuries      | Male   | 0-6 days    | 95+ years | Global     | 0         | 2     | LDI (IS per capita)                                    | --              |
| Other road injuries      | Male   | 0-6 days    | 95+ years | Global     | -1        | 3     | Socio-demographic Index                                | 674             |
| Other road injuries      | Male   | 0-6 days    | 95+ years | Global     | 1         | 3     | Rainfall Quintile 5 (proportion)                       | --              |
| Other transport injuries | Female | 0-6 days    | 95+ years | Data Rich  | 1         | 1     | Vehicles - 2 wheels fraction (proportion)              | 4               |
| Other transport injuries | Female | 0-6 days    | 95+ years | Data Rich  | 1         | 1     | Alcohol (liters per capita)                            | 702             |
| Other transport injuries | Female | 0-6 days    | 95+ years | Data Rich  | 1         | 1     | Log-transformed SEV scalar: Oth Trans                  | 766             |
| Other transport injuries | Female | 0-6 days    | 95+ years | Data Rich  | 1         | 1     | Vehicles - 2+4 wheels (per capita)                     | --              |
| Other transport injuries | Female | 0-6 days    | 95+ years | Data Rich  | -1        | 2     | Healthcare access and quality index                    | 4               |
| Other transport injuries | Female | 0-6 days    | 95+ years | Data Rich  | 0         | 2     | Population Density (300-500 ppl/sqkm, proportion)      | 233             |
| Other transport injuries | Female | 0-6 days    | 95+ years | Data Rich  | 0         | 2     | Population Density (500-1000 ppl/sqkm, proportion)     | 234             |
| Other transport injuries | Female | 0-6 days    | 95+ years | Data Rich  | 0         | 3     | Education (years per capita)                           | 36              |
| Other transport injuries | Female | 0-6 days    | 95+ years | Data Rich  | 0         | 3     | Socio-demographic Index                                | 62              |
| Other transport injuries | Female | 0-6 days    | 95+ years | Data Rich  | 0         | 3     | LDI (IS per capita)                                    | --              |
| Other transport injuries | Female | 0-6 days    | 95+ years | Data Rich  | 1         | 3     | Rainfall Quintile 5 (proportion)                       | --              |
| Other transport injuries | Female | 0-6 days    | 95+ years | Global     | 1         | 1     | Log-transformed SEV scalar: Oth Trans                  | 204             |
| Other transport injuries | Female | 0-6 days    | 95+ years | Global     | 1         | 1     | Vehicles - 2 wheels fraction (proportion)              | 436             |
| Other transport injuries | Female | 0-6 days    | 95+ years | Global     | 1         | 1     | Alcohol (liters per capita)                            | 702             |
| Other transport injuries | Female | 0-6 days    | 95+ years | Global     | 1         | 1     | Vehicles - 2+4 wheels (per capita)                     | --              |
| Other transport injuries | Female | 0-6 days    | 95+ years | Global     | -1        | 2     | Healthcare access and quality index                    | 1               |
| Other transport injuries | Female | 0-6 days    | 95+ years | Global     | 0         | 2     | Population Density (300-500 ppl/sqkm, proportion)      | 481             |
| Other transport injuries | Female | 0-6 days    | 95+ years | Global     | 0         | 2     | Population Density (500-1000 ppl/sqkm, proportion)     | 481             |
| Other transport injuries | Female | 0-6 days    | 95+ years | Global     | 0         | 3     | Education (years per capita)                           | 136             |
| Other transport injuries | Female | 0-6 days    | 95+ years | Global     | 0         | 3     | Socio-demographic Index                                | 150             |
| Other transport injuries | Female | 0-6 days    | 95+ years | Global     | 0         | 3     | LDI (IS per capita)                                    | --              |
| Other transport injuries | Female | 0-6 days    | 95+ years | Global     | 1         | 3     | Rainfall Quintile 5 (proportion)                       | --              |
| Other transport injuries | Male   | 0-6 days    | 95+ years | Data Rich  | 1         | 1     | Log-transformed SEV scalar: Oth Trans                  | 418             |
| Other transport injuries | Male   | 0-6 days    | 95+ years | Data Rich  | 1         | 1     | Alcohol (liters per capita)                            | 564             |
| Other transport injuries | Male   | 0-6 days    | 95+ years | Data Rich  | 1         | 1     | Vehicles - 2 wheels fraction (proportion)              | 999             |
| Other transport injuries | Male   | 0-6 days    | 95+ years | Data Rich  | 1         | 1     | Vehicles - 2+4 wheels (per capita)                     | --              |
| Other transport injuries | Male   | 0-6 days    | 95+ years | Data Rich  | -1        | 2     | Healthcare access and quality index                    | 11              |
| Other transport injuries | Male   | 0-6 days    | 95+ years | Data Rich  | 0         | 2     | Population Density (300-500 ppl/sqkm, proportion)      | 414             |
| Other transport injuries | Male   | 0-6 days    | 95+ years | Data Rich  | 0         | 2     | Population Density (500-1000 ppl/sqkm, proportion)     | 586             |
| Other transport injuries | Male   | 0-6 days    | 95+ years | Data Rich  | 0         | 3     | Socio-demographic Index                                | 70              |
| Other transport injuries | Male   | 0-6 days    | 95+ years | Data Rich  | 0         | 3     | Education (years per capita)                           | 178             |
| Other transport injuries | Male   | 0-6 days    | 95+ years | Data Rich  | 1         | 3     | LDI (IS per capita)                                    | --              |
| Other transport injuries | Male   | 0-6 days    | 95+ years | Data Rich  | 1         | 3     | Rainfall Quintile 5 (proportion)                       | --              |
| Other transport injuries | Male   | 0-6 days    | 95+ years | Global     | 1         | 1     | Alcohol (liters per capita)                            | 97              |
| Other transport injuries | Male   | 0-6 days    | 95+ years | Global     | 1         | 1     | Log-transformed SEV scalar: Oth Trans                  | 507             |
| Other transport injuries | Male   | 0-6 days    | 95+ years | Global     | 1         | 1     | Vehicles - 2 wheels fraction (proportion)              | 938             |
| Other transport injuries | Male   | 0-6 days    | 95+ years | Global     | 1         | 1     | Vehicles - 2+4 wheels (per capita)                     | --              |
| Other transport injuries | Male   | 0-6 days    | 95+ years | Global     | -1        | 2     | Healthcare access and quality index                    | 103             |
| Other transport injuries | Male   | 0-6 days    | 95+ years | Global     | 0         | 2     | Population Density (300-500 ppl/sqkm, proportion)      | 507             |
| Other transport injuries | Male   | 0-6 days    | 95+ years | Global     | 0         | 2     | Population Density (500-1000 ppl/sqkm, proportion)     | 507             |
| Other transport injuries | Male   | 0-6 days    | 95+ years | Global     | 0         | 3     | Socio-demographic Index                                | 376             |
| Other transport injuries | Male   | 0-6 days    | 95+ years | Global     | 0         | 3     | Education (years per capita)                           | 486             |
| Other transport injuries | Male   | 0-6 days    | 95+ years | Global     | 1         | 3     | LDI (IS per capita)                                    | --              |
| Other transport injuries | Male   | 0-6 days    | 95+ years | Global     | 1         | 3     | Rainfall Quintile 5 (proportion)                       | --              |
| Unintentional injuries   | Female | 28-364 days | 95+ years | Data Rich  | -1        | 1     | Health System Access 2 (unitless)                      | 650             |
| Unintentional injuries   | Female | 28-364 days | 95+ years | Data Rich  | 1         | 1     | Cumulative Cigarettes (5 Years)                        | 29              |
| Unintentional injuries   | Female | 28-364 days | 95+ years | Data Rich  | 1         | 1     | Smoking Prevalence                                     | 162             |
| Unintentional injuries   | Female | 28-364 days | 95+ years | Data Rich  | 1         | 1     | Indoor Air Pollution (All Cooking Fuels)               | 179             |
| Unintentional injuries   | Female | 28-364 days | 95+ years | Data Rich  | 1         | 1     | Diabetes Fasting Plasma Glucose (mmol/L)               | 589             |
| Unintentional injuries   | Female | 28-364 days | 95+ years | Data Rich  | 1         | 1     | Underweight (proportion <2SD weight for age, <5 years) | --              |
| Unintentional injuries   | Female | 28-364 days | 95+ years | Data Rich  | 1         | 2     | Population Density (500-1000 ppl/sqkm, proportion)     | 569             |
| Unintentional injuries   | Female | 28-364 days | 95+ years | Data Rich  | 1         | 2     | Alcohol (liters per capita)                            | 583             |
| Unintentional injuries   | Female | 28-364 days | 95+ years | Data Rich  | 1         | 2     | Population Density (over 1000 ppl/sqkm, proportion)    | --              |
| Unintentional injuries   | Female | 28-364 days | 95+ years | Data Rich  | -1        | 3     | Education (years per capita)                           | 51              |
| Unintentional injuries   | Female | 28-364 days | 95+ years | Data Rich  | -1        | 3     | LDI (IS per capita)                                    | --              |
| Unintentional injuries   | Female | 28-364 days | 95+ years | Global     | -1        | 1     | Health System Access 2 (unitless)                      | 216             |
| Unintentional injuries   | Female | 28-364 days | 95+ years | Global     | 1         | 1     | Smoking Prevalence                                     | 23              |
| Unintentional injuries   | Female | 28-364 days | 95+ years | Global     | 1         | 1     | Cumulative Cigarettes (5 Years)                        | 26              |
| Unintentional injuries   | Female | 28-364 days | 95+ years | Global     | 1         | 1     | Indoor Air Pollution (All Cooking Fuels)               | 32              |
| Unintentional injuries   | Female | 28-364 days | 95+ years | Global     | 1         | 1     | Diabetes Fasting Plasma Glucose (mmol/L)               | 746             |
| Unintentional injuries   | Female | 28-364 days | 95+ years | Global     | 1         | 1     | Underweight (proportion <2SD weight for age, <5 years) | --              |
| Unintentional injuries   | Female | 28-364 days | 95+ years | Global     | 1         | 2     | Alcohol (liters per capita)                            | 509             |
| Unintentional injuries   | Female | 28-364 days | 95+ years | Global     | 1         | 2     | Population Density (500-1000 ppl/sqkm, proportion)     | 565             |
| Unintentional injuries   | Female | 28-364 days | 95+ years | Global     | 1         | 2     | Population Density (over 1000 ppl/sqkm, proportion)    | --              |
| Unintentional injuries   | Female | 28-364 days | 95+ years | Global     | -1        | 3     | Education (years per capita)                           | 57              |
| Unintentional injuries   | Female | 28-364 days | 95+ years | Global     | -1        | 3     | LDI (IS per capita)                                    | --              |
| Unintentional injuries   | Male   | 28-364 days | 95+ years | Data Rich  | -1        | 1     | Health System Access 2 (unitless)                      | 703             |
| Unintentional injuries   | Male   | 28-364 days | 95+ years | Data Rich  | 1         | 1     | Smoking Prevalence                                     | 3               |
| Unintentional injuries   | Male   | 28-364 days | 95+ years | Data Rich  | 1         | 1     | Indoor Air Pollution (All Cooking Fuels)               | 589             |
| Unintentional injuries   | Male   | 28-364 days | 95+ years | Data Rich  | 1         | 1     | Diabetes Fasting Plasma Glucose (mmol/L)               | 616             |
| Unintentional injuries   | Male   | 28-364 days | 95+ years | Data Rich  | 1         | 1     | Cumulative Cigarettes (5 Years)                        | 897             |
| Unintentional injuries   | Male   | 28-364 days | 95+ years | Data Rich  | 1         | 1     | Underweight (proportion <2SD weight for age, <5 years) | --              |
| Unintentional injuries   | Male   | 28-364 days | 95+ years | Data Rich  | 1         | 2     | Population Density (500-1000 ppl/sqkm, proportion)     | 655             |
| Unintentional injuries   | Male   | 28-364 days | 95+ years | Data Rich  | 1         | 2     | Alcohol (liters per capita)                            | 669             |

**Appendix Table 9: CODEm covariates used, level of covariate, and expected direction of covariate by cause, sex, and age**

*Covariates that CODEm did not select during the covariate selection process have no draw counts listed.*

| Cause                  | Sex    | Age Start   | Age End   | Model Type | Direction | Level | Covariate Name                                         | Number of Draws |
|------------------------|--------|-------------|-----------|------------|-----------|-------|--------------------------------------------------------|-----------------|
| Unintentional injuries | Male   | 28-364 days | 95+ years | Data Rich  | 1         | 2     | Population Density (over 1000 ppl/sqkm, proportion)    | --              |
| Unintentional injuries | Male   | 28-364 days | 95+ years | Data Rich  | -1        | 3     | Education (years per capita)                           | 5               |
| Unintentional injuries | Male   | 28-364 days | 95+ years | Data Rich  | -1        | 3     | LDI (IS per capita)                                    | --              |
| Unintentional injuries | Male   | 28-364 days | 95+ years | Global     | -1        | 1     | Health System Access 2 (unitless)                      | 328             |
| Unintentional injuries | Male   | 28-364 days | 95+ years | Global     | 1         | 1     | Smoking Prevalence                                     | 4               |
| Unintentional injuries | Male   | 28-364 days | 95+ years | Global     | 1         | 1     | Indoor Air Pollution (All Cooking Fuels)               | 486             |
| Unintentional injuries | Male   | 28-364 days | 95+ years | Global     | 1         | 1     | Diabetes Fasting Plasma Glucose (mmol/L)               | 798             |
| Unintentional injuries | Male   | 28-364 days | 95+ years | Global     | 1         | 1     | Cumulative Cigarettes (5 Years)                        | 905             |
| Unintentional injuries | Male   | 28-364 days | 95+ years | Global     | 1         | 1     | Underweight (proportion <2SD weight for age, <5 years) | --              |
| Unintentional injuries | Male   | 28-364 days | 95+ years | Global     | 1         | 2     | Population Density (500-1000 ppl/sqkm, proportion)     | 740             |
| Unintentional injuries | Male   | 28-364 days | 95+ years | Global     | 1         | 2     | Alcohol (liters per capita)                            | 787             |
| Unintentional injuries | Male   | 28-364 days | 95+ years | Global     | 1         | 2     | Population Density (over 1000 ppl/sqkm, proportion)    | --              |
| Unintentional injuries | Male   | 28-364 days | 95+ years | Global     | -1        | 3     | Education (years per capita)                           | 0               |
| Unintentional injuries | Male   | 28-364 days | 95+ years | Global     | -1        | 3     | LDI (IS per capita)                                    | --              |
| Falls                  | Female | 0-6 days    | 95+ years | Data Rich  | 1         | 1     | Log-transformed SEV scalar: Falls                      | 214             |
| Falls                  | Female | 0-6 days    | 95+ years | Data Rich  | 1         | 1     | Alcohol (liters per capita)                            | 967             |
| Falls                  | Female | 0-6 days    | 95+ years | Data Rich  | -1        | 2     | Healthcare access and quality index                    | 12              |
| Falls                  | Female | 0-6 days    | 95+ years | Data Rich  | -1        | 2     | milk adjusted(g)                                       | 432             |
| Falls                  | Female | 0-6 days    | 95+ years | Data Rich  | 0         | 3     | Socio-demographic Index                                | 21              |
| Falls                  | Female | 0-6 days    | 95+ years | Data Rich  | 0         | 3     | LDI (IS per capita)                                    | --              |
| Falls                  | Female | 0-6 days    | 95+ years | Data Rich  | 1         | 3     | Elevation Over 1500m (proportion)                      | 276             |
| Falls                  | Female | 0-6 days    | 95+ years | Global     | 1         | 1     | Log-transformed SEV scalar: Falls                      | 387             |
| Falls                  | Female | 0-6 days    | 95+ years | Global     | 1         | 1     | Alcohol (liters per capita)                            | 836             |
| Falls                  | Female | 0-6 days    | 95+ years | Global     | -1        | 2     | milk adjusted(g)                                       | 45              |
| Falls                  | Female | 0-6 days    | 95+ years | Global     | -1        | 2     | Healthcare access and quality index                    | 388             |
| Falls                  | Female | 0-6 days    | 95+ years | Global     | 0         | 3     | Socio-demographic Index                                | 658             |
| Falls                  | Female | 0-6 days    | 95+ years | Global     | 0         | 3     | LDI (IS per capita)                                    | --              |
| Falls                  | Female | 0-6 days    | 95+ years | Global     | 1         | 3     | Elevation Over 1500m (proportion)                      | 494             |
| Falls                  | Male   | 0-6 days    | 95+ years | Data Rich  | 1         | 1     | Log-transformed SEV scalar: Falls                      | 614             |
| Falls                  | Male   | 0-6 days    | 95+ years | Data Rich  | 1         | 1     | Alcohol (liters per capita)                            | 806             |
| Falls                  | Male   | 0-6 days    | 95+ years | Data Rich  | -1        | 2     | Healthcare access and quality index                    | 48              |
| Falls                  | Male   | 0-6 days    | 95+ years | Data Rich  | -1        | 2     | milk adjusted(g)                                       | --              |
| Falls                  | Male   | 0-6 days    | 95+ years | Data Rich  | 0         | 3     | Socio-demographic Index                                | 727             |
| Falls                  | Male   | 0-6 days    | 95+ years | Data Rich  | 0         | 3     | LDI (IS per capita)                                    | --              |
| Falls                  | Male   | 0-6 days    | 95+ years | Data Rich  | 1         | 3     | Elevation Over 1500m (proportion)                      | 737             |
| Falls                  | Male   | 0-6 days    | 95+ years | Global     | 1         | 1     | Alcohol (liters per capita)                            | 1000            |
| Falls                  | Male   | 0-6 days    | 95+ years | Global     | 1         | 1     | Log-transformed SEV scalar: Falls                      | --              |
| Falls                  | Male   | 0-6 days    | 95+ years | Global     | -1        | 2     | Healthcare access and quality index                    | 317             |
| Falls                  | Male   | 0-6 days    | 95+ years | Global     | -1        | 2     | milk adjusted(g)                                       | --              |
| Falls                  | Male   | 0-6 days    | 95+ years | Global     | 0         | 3     | Socio-demographic Index                                | 561             |
| Falls                  | Male   | 0-6 days    | 95+ years | Global     | 0         | 3     | LDI (IS per capita)                                    | --              |
| Falls                  | Male   | 0-6 days    | 95+ years | Global     | 1         | 3     | Elevation Over 1500m (proportion)                      | 561             |
| Drowning               | Female | 0-6 days    | 95+ years | Data Rich  | -1        | 1     | Landlocked Nation (binary)                             | --              |
| Drowning               | Female | 0-6 days    | 95+ years | Data Rich  | -1        | 1     | Rainfall Quintile 1 (proportion)                       | --              |
| Drowning               | Female | 0-6 days    | 95+ years | Data Rich  | 1         | 1     | Coastal Population within 10km (proportion)            | 945             |
| Drowning               | Female | 0-6 days    | 95+ years | Data Rich  | 1         | 1     | Alcohol (liters per capita)                            | 1000            |
| Drowning               | Female | 0-6 days    | 95+ years | Data Rich  | 1         | 1     | Log-transformed SEV scalar: Drown                      | --              |
| Drowning               | Female | 0-6 days    | 95+ years | Data Rich  | 1         | 1     | Rainfall Quintile 5 (proportion)                       | --              |
| Drowning               | Female | 0-6 days    | 95+ years | Data Rich  | 1         | 2     | Elevation Under 100m (proportion)                      | --              |
| Drowning               | Female | 0-6 days    | 95+ years | Data Rich  | -1        | 3     | Socio-demographic Index                                | 38              |
| Drowning               | Female | 0-6 days    | 95+ years | Data Rich  | -1        | 3     | Education (years per capita)                           | 641             |
| Drowning               | Female | 0-6 days    | 95+ years | Data Rich  | 0         | 3     | LDI (IS per capita)                                    | --              |
| Drowning               | Female | 0-6 days    | 95+ years | Global     | -1        | 1     | Landlocked Nation (binary)                             | --              |
| Drowning               | Female | 0-6 days    | 95+ years | Global     | -1        | 1     | Rainfall Quintile 1 (proportion)                       | --              |
| Drowning               | Female | 0-6 days    | 95+ years | Global     | 1         | 1     | Alcohol (liters per capita)                            | 393             |
| Drowning               | Female | 0-6 days    | 95+ years | Global     | 1         | 1     | Coastal Population within 10km (proportion)            | 754             |
| Drowning               | Female | 0-6 days    | 95+ years | Global     | 1         | 1     | Rainfall Quintile 5 (proportion)                       | 767             |
| Drowning               | Female | 0-6 days    | 95+ years | Global     | 1         | 1     | Log-transformed SEV scalar: Drown                      | --              |
| Drowning               | Female | 0-6 days    | 95+ years | Global     | 1         | 2     | Elevation Under 100m (proportion)                      | 22              |
| Drowning               | Female | 0-6 days    | 95+ years | Global     | -1        | 3     | Socio-demographic Index                                | 355             |
| Drowning               | Female | 0-6 days    | 95+ years | Global     | -1        | 3     | Education (years per capita)                           | 543             |
| Drowning               | Female | 0-6 days    | 95+ years | Global     | 0         | 3     | LDI (IS per capita)                                    | --              |
| Drowning               | Male   | 0-6 days    | 95+ years | Data Rich  | -1        | 1     | Landlocked Nation (binary)                             | --              |
| Drowning               | Male   | 0-6 days    | 95+ years | Data Rich  | -1        | 1     | Rainfall Quintile 1 (proportion)                       | --              |
| Drowning               | Male   | 0-6 days    | 95+ years | Data Rich  | 1         | 1     | Coastal Population within 10km (proportion)            | 626             |
| Drowning               | Male   | 0-6 days    | 95+ years | Data Rich  | 1         | 1     | Rainfall Quintile 5 (proportion)                       | 858             |
| Drowning               | Male   | 0-6 days    | 95+ years | Data Rich  | 1         | 1     | Alcohol (liters per capita)                            | 1000            |
| Drowning               | Male   | 0-6 days    | 95+ years | Data Rich  | 1         | 1     | Log-transformed SEV scalar: Drown                      | --              |
| Drowning               | Male   | 0-6 days    | 95+ years | Data Rich  | 1         | 2     | Elevation Under 100m (proportion)                      | 336             |
| Drowning               | Male   | 0-6 days    | 95+ years | Data Rich  | -1        | 3     | Education (years per capita)                           | 17              |
| Drowning               | Male   | 0-6 days    | 95+ years | Data Rich  | -1        | 3     | Socio-demographic Index                                | 983             |
| Drowning               | Male   | 0-6 days    | 95+ years | Data Rich  | 0         | 3     | LDI (IS per capita)                                    | --              |
| Drowning               | Male   | 0-6 days    | 95+ years | Global     | -1        | 1     | Rainfall Quintile 1 (proportion)                       | 546             |
| Drowning               | Male   | 0-6 days    | 95+ years | Global     | -1        | 1     | Landlocked Nation (binary)                             | --              |
| Drowning               | Male   | 0-6 days    | 95+ years | Global     | 1         | 1     | Coastal Population within 10km (proportion)            | 259             |
| Drowning               | Male   | 0-6 days    | 95+ years | Global     | 1         | 1     | Rainfall Quintile 5 (proportion)                       | 339             |
| Drowning               | Male   | 0-6 days    | 95+ years | Global     | 1         | 1     | Alcohol (liters per capita)                            | 644             |
| Drowning               | Male   | 0-6 days    | 95+ years | Global     | 1         | 1     | Log-transformed SEV scalar: Drown                      | --              |



**Appendix Table 9: CODEm covariates used, level of covariate, and expected direction of covariate by cause, sex, and age**

*Covariates that CODEm did not select during the covariate selection process have no draw counts listed.*

| Cause                          | Sex    | Age Start | Age End   | Model Type | Direction | Level | Covariate Name                                      | Number of Draws |
|--------------------------------|--------|-----------|-----------|------------|-----------|-------|-----------------------------------------------------|-----------------|
| Drowning                       | Male   | 0-6 days  | 95+ years | Global     | 1         | 2     | Elevation Under 100m (proportion)                   | 672             |
| Drowning                       | Male   | 0-6 days  | 95+ years | Global     | -1        | 3     | Education (years per capita)                        | 306             |
| Drowning                       | Male   | 0-6 days  | 95+ years | Global     | -1        | 3     | Socio-demographic Index                             | 500             |
| Drowning                       | Male   | 0-6 days  | 95+ years | Global     | 0         | 3     | LDI (IS per capita)                                 | --              |
| Fire, heat, and hot substances | Female | 0-6 days  | 95+ years | Data Rich  | 1         | 1     | Log-transformed SEV scalar: Fire                    | --              |
| Fire, heat, and hot substances | Female | 0-6 days  | 95+ years | Data Rich  | -1        | 2     | Healthcare access and quality index                 | 967             |
| Fire, heat, and hot substances | Female | 0-6 days  | 95+ years | Data Rich  | 0         | 2     | Population Density (over 1000 ppl/sqkm, proportion) | 967             |
| Fire, heat, and hot substances | Female | 0-6 days  | 95+ years | Data Rich  | 1         | 2     | Alcohol (liters per capita)                         | 967             |
| Fire, heat, and hot substances | Female | 0-6 days  | 95+ years | Data Rich  | 1         | 2     | Indoor Air Pollution (All Cooking Fuels)            | 967             |
| Fire, heat, and hot substances | Female | 0-6 days  | 95+ years | Data Rich  | 1         | 2     | Tobacco (cigarettes per capita)                     | 967             |
| Fire, heat, and hot substances | Female | 0-6 days  | 95+ years | Data Rich  | -1        | 3     | Socio-demographic Index                             | 33              |
| Fire, heat, and hot substances | Female | 0-6 days  | 95+ years | Data Rich  | -1        | 3     | Education (years per capita)                        | --              |
| Fire, heat, and hot substances | Female | 0-6 days  | 95+ years | Data Rich  | 0         | 3     | LDI (IS per capita)                                 | --              |
| Fire, heat, and hot substances | Female | 0-6 days  | 95+ years | Global     | 1         | 1     | Log-transformed SEV scalar: Fire                    | --              |
| Fire, heat, and hot substances | Female | 0-6 days  | 95+ years | Global     | -1        | 2     | Healthcare access and quality index                 | 740             |
| Fire, heat, and hot substances | Female | 0-6 days  | 95+ years | Global     | 0         | 2     | Population Density (over 1000 ppl/sqkm, proportion) | 740             |
| Fire, heat, and hot substances | Female | 0-6 days  | 95+ years | Global     | 1         | 2     | Alcohol (liters per capita)                         | 740             |
| Fire, heat, and hot substances | Female | 0-6 days  | 95+ years | Global     | 1         | 2     | Indoor Air Pollution (All Cooking Fuels)            | 740             |
| Fire, heat, and hot substances | Female | 0-6 days  | 95+ years | Global     | 1         | 2     | Tobacco (cigarettes per capita)                     | 740             |
| Fire, heat, and hot substances | Female | 0-6 days  | 95+ years | Global     | -1        | 3     | Education (years per capita)                        | 260             |
| Fire, heat, and hot substances | Female | 0-6 days  | 95+ years | Global     | -1        | 3     | Socio-demographic Index                             | 260             |
| Fire, heat, and hot substances | Female | 0-6 days  | 95+ years | Global     | 0         | 3     | LDI (IS per capita)                                 | --              |
| Fire, heat, and hot substances | Male   | 0-6 days  | 95+ years | Data Rich  | 1         | 1     | Log-transformed SEV scalar: Fire                    | --              |
| Fire, heat, and hot substances | Male   | 0-6 days  | 95+ years | Data Rich  | -1        | 2     | Healthcare access and quality index                 | 366             |
| Fire, heat, and hot substances | Male   | 0-6 days  | 95+ years | Data Rich  | 0         | 2     | Population Density (over 1000 ppl/sqkm, proportion) | 57              |
| Fire, heat, and hot substances | Male   | 0-6 days  | 95+ years | Data Rich  | 1         | 2     | Indoor Air Pollution (All Cooking Fuels)            | 3               |
| Fire, heat, and hot substances | Male   | 0-6 days  | 95+ years | Data Rich  | 1         | 2     | Tobacco (cigarettes per capita)                     | 313             |
| Fire, heat, and hot substances | Male   | 0-6 days  | 95+ years | Data Rich  | 1         | 2     | Alcohol (liters per capita)                         | 368             |
| Fire, heat, and hot substances | Male   | 0-6 days  | 95+ years | Data Rich  | -1        | 3     | Education (years per capita)                        | 140             |
| Fire, heat, and hot substances | Male   | 0-6 days  | 95+ years | Data Rich  | -1        | 3     | Socio-demographic Index                             | 509             |
| Fire, heat, and hot substances | Male   | 0-6 days  | 95+ years | Data Rich  | 0         | 3     | LDI (IS per capita)                                 | --              |
| Fire, heat, and hot substances | Male   | 0-6 days  | 95+ years | Global     | 1         | 1     | Log-transformed SEV scalar: Fire                    | --              |
| Fire, heat, and hot substances | Male   | 0-6 days  | 95+ years | Global     | -1        | 2     | Healthcare access and quality index                 | 303             |
| Fire, heat, and hot substances | Male   | 0-6 days  | 95+ years | Global     | 0         | 2     | Population Density (over 1000 ppl/sqkm, proportion) | 303             |
| Fire, heat, and hot substances | Male   | 0-6 days  | 95+ years | Global     | 1         | 2     | Alcohol (liters per capita)                         | 303             |
| Fire, heat, and hot substances | Male   | 0-6 days  | 95+ years | Global     | 1         | 2     | Indoor Air Pollution (All Cooking Fuels)            | 303             |
| Fire, heat, and hot substances | Male   | 0-6 days  | 95+ years | Global     | 1         | 2     | Tobacco (cigarettes per capita)                     | 557             |
| Fire, heat, and hot substances | Male   | 0-6 days  | 95+ years | Global     | -1        | 3     | Education (years per capita)                        | 150             |
| Fire, heat, and hot substances | Male   | 0-6 days  | 95+ years | Global     | -1        | 3     | Socio-demographic Index                             | 593             |
| Fire, heat, and hot substances | Male   | 0-6 days  | 95+ years | Global     | 0         | 3     | LDI (IS per capita)                                 | --              |
| Poisonings                     | Female | 0-6 days  | 95+ years | Data Rich  | 1         | 1     | Opium Cultivation (binary)                          | 999             |
| Poisonings                     | Female | 0-6 days  | 95+ years | Data Rich  | 1         | 1     | Log-transformed SEV scalar: Poison                  | --              |
| Poisonings                     | Female | 0-6 days  | 95+ years | Data Rich  | -1        | 2     | Healthcare access and quality index                 | 962             |
| Poisonings                     | Female | 0-6 days  | 95+ years | Data Rich  | 0         | 2     | Population Density (under 150 ppl/sqkm, proportion) | 961             |
| Poisonings                     | Female | 0-6 days  | 95+ years | Data Rich  | 0         | 2     | Population Density (over 1000 ppl/sqkm, proportion) | 962             |
| Poisonings                     | Female | 0-6 days  | 95+ years | Data Rich  | -1        | 3     | Socio-demographic Index                             | 32              |
| Poisonings                     | Female | 0-6 days  | 95+ years | Data Rich  | -1        | 3     | Education (years per capita)                        | 160             |
| Poisonings                     | Female | 0-6 days  | 95+ years | Data Rich  | 0         | 3     | LDI (IS per capita)                                 | --              |
| Poisonings                     | Female | 0-6 days  | 95+ years | Global     | 1         | 1     | Opium Cultivation (binary)                          | 1000            |
| Poisonings                     | Female | 0-6 days  | 95+ years | Global     | 1         | 1     | Log-transformed SEV scalar: Poison                  | --              |
| Poisonings                     | Female | 0-6 days  | 95+ years | Global     | -1        | 2     | Healthcare access and quality index                 | 218             |
| Poisonings                     | Female | 0-6 days  | 95+ years | Global     | 0         | 2     | Population Density (over 1000 ppl/sqkm, proportion) | 432             |
| Poisonings                     | Female | 0-6 days  | 95+ years | Global     | 0         | 2     | Population Density (under 150 ppl/sqkm, proportion) | --              |
| Poisonings                     | Female | 0-6 days  | 95+ years | Global     | -1        | 3     | Socio-demographic Index                             | 141             |
| Poisonings                     | Female | 0-6 days  | 95+ years | Global     | -1        | 3     | Education (years per capita)                        | 264             |
| Poisonings                     | Female | 0-6 days  | 95+ years | Global     | 0         | 3     | LDI (IS per capita)                                 | --              |
| Poisonings                     | Male   | 0-6 days  | 95+ years | Data Rich  | 1         | 1     | Log-transformed SEV scalar: Poison                  | --              |
| Poisonings                     | Male   | 0-6 days  | 95+ years | Data Rich  | 1         | 1     | Opium Cultivation (binary)                          | --              |
| Poisonings                     | Male   | 0-6 days  | 95+ years | Data Rich  | -1        | 2     | Healthcare access and quality index                 | 864             |
| Poisonings                     | Male   | 0-6 days  | 95+ years | Data Rich  | 0         | 2     | Population Density (over 1000 ppl/sqkm, proportion) | 864             |
| Poisonings                     | Male   | 0-6 days  | 95+ years | Data Rich  | 0         | 2     | Population Density (under 150 ppl/sqkm, proportion) | 864             |
| Poisonings                     | Male   | 0-6 days  | 95+ years | Data Rich  | -1        | 3     | Education (years per capita)                        | 25              |
| Poisonings                     | Male   | 0-6 days  | 95+ years | Data Rich  | -1        | 3     | Socio-demographic Index                             | 164             |
| Poisonings                     | Male   | 0-6 days  | 95+ years | Data Rich  | 0         | 3     | LDI (IS per capita)                                 | --              |
| Poisonings                     | Male   | 0-6 days  | 95+ years | Global     | 1         | 1     | Opium Cultivation (binary)                          | 412             |
| Poisonings                     | Male   | 0-6 days  | 95+ years | Global     | 1         | 1     | Log-transformed SEV scalar: Poison                  | --              |
| Poisonings                     | Male   | 0-6 days  | 95+ years | Global     | -1        | 2     | Healthcare access and quality index                 | 352             |
| Poisonings                     | Male   | 0-6 days  | 95+ years | Global     | 0         | 2     | Population Density (over 1000 ppl/sqkm, proportion) | 560             |
| Poisonings                     | Male   | 0-6 days  | 95+ years | Global     | 0         | 2     | Population Density (under 150 ppl/sqkm, proportion) | 560             |
| Poisonings                     | Male   | 0-6 days  | 95+ years | Global     | -1        | 3     | Education (years per capita)                        | 236             |
| Poisonings                     | Male   | 0-6 days  | 95+ years | Global     | -1        | 3     | Socio-demographic Index                             | 236             |
| Poisonings                     | Male   | 0-6 days  | 95+ years | Global     | 0         | 3     | LDI (IS per capita)                                 | --              |
| Poisoning by carbon monoxide   | Female | 0-6 days  | 95+ years | Data Rich  | -1        | 3     | Education (years per capita)                        | 6               |
| Poisoning by carbon monoxide   | Female | 0-6 days  | 95+ years | Data Rich  | -1        | 3     | Healthcare access and quality index                 | 31              |
| Poisoning by carbon monoxide   | Female | 0-6 days  | 95+ years | Data Rich  | 0         | 3     | Socio-demographic Index                             | 962             |
| Poisoning by carbon monoxide   | Female | 0-6 days  | 95+ years | Data Rich  | 0         | 3     | LDI (IS per capita)                                 | --              |
| Poisoning by carbon monoxide   | Female | 0-6 days  | 95+ years | Global     | -1        | 3     | Education (years per capita)                        | 444             |
| Poisoning by carbon monoxide   | Female | 0-6 days  | 95+ years | Global     | -1        | 3     | Healthcare access and quality index                 | 530             |

**Appendix Table 9: CODEm covariates used, level of covariate, and expected direction of covariate by cause, sex, and age**

*Covariates that CODEm did not select during the covariate selection process have no draw counts listed.*

| Cause                          | Sex    | Age Start | Age End   | Model Type | Direction | Level | Covariate Name                                      | Number of Draws |
|--------------------------------|--------|-----------|-----------|------------|-----------|-------|-----------------------------------------------------|-----------------|
| Poisoning by carbon monoxide   | Female | 0-6 days  | 95+ years | Global     | 0         | 3     | Socio-demographic Index                             | 395             |
| Poisoning by carbon monoxide   | Female | 0-6 days  | 95+ years | Global     | 0         | 3     | LDI (IS per capita)                                 | --              |
| Poisoning by carbon monoxide   | Male   | 0-6 days  | 95+ years | Data Rich  | -1        | 3     | Healthcare access and quality index                 | 1               |
| Poisoning by carbon monoxide   | Male   | 0-6 days  | 95+ years | Data Rich  | -1        | 3     | Education (years per capita)                        | 961             |
| Poisoning by carbon monoxide   | Male   | 0-6 days  | 95+ years | Data Rich  | 0         | 3     | Socio-demographic Index                             | 999             |
| Poisoning by carbon monoxide   | Male   | 0-6 days  | 95+ years | Data Rich  | 0         | 3     | LDI (IS per capita)                                 | --              |
| Poisoning by carbon monoxide   | Male   | 0-6 days  | 95+ years | Global     | -1        | 3     | Healthcare access and quality index                 | 274             |
| Poisoning by carbon monoxide   | Male   | 0-6 days  | 95+ years | Global     | -1        | 3     | Education (years per capita)                        | 768             |
| Poisoning by carbon monoxide   | Male   | 0-6 days  | 95+ years | Global     | 0         | 3     | Socio-demographic Index                             | 410             |
| Poisoning by carbon monoxide   | Male   | 0-6 days  | 95+ years | Global     | 0         | 3     | LDI (IS per capita)                                 | --              |
| Poisoning by other means       | Female | 0-6 days  | 95+ years | Data Rich  | -1        | 3     | Education (years per capita)                        | 161             |
| Poisoning by other means       | Female | 0-6 days  | 95+ years | Data Rich  | -1        | 3     | Healthcare access and quality index                 | 967             |
| Poisoning by other means       | Female | 0-6 days  | 95+ years | Data Rich  | 0         | 3     | Socio-demographic Index                             | 193             |
| Poisoning by other means       | Female | 0-6 days  | 95+ years | Data Rich  | 0         | 3     | LDI (IS per capita)                                 | --              |
| Poisoning by other means       | Female | 0-6 days  | 95+ years | Global     | -1        | 3     | Education (years per capita)                        | 365             |
| Poisoning by other means       | Female | 0-6 days  | 95+ years | Global     | -1        | 3     | Healthcare access and quality index                 | 399             |
| Poisoning by other means       | Female | 0-6 days  | 95+ years | Global     | 0         | 3     | Socio-demographic Index                             | 444             |
| Poisoning by other means       | Female | 0-6 days  | 95+ years | Global     | 0         | 3     | LDI (IS per capita)                                 | --              |
| Poisoning by other means       | Male   | 0-6 days  | 95+ years | Data Rich  | -1        | 3     | Education (years per capita)                        | 967             |
| Poisoning by other means       | Male   | 0-6 days  | 95+ years | Data Rich  | -1        | 3     | Healthcare access and quality index                 | 1000            |
| Poisoning by other means       | Male   | 0-6 days  | 95+ years | Data Rich  | 0         | 3     | Socio-demographic Index                             | 993             |
| Poisoning by other means       | Male   | 0-6 days  | 95+ years | Data Rich  | 0         | 3     | LDI (IS per capita)                                 | --              |
| Poisoning by other means       | Male   | 0-6 days  | 95+ years | Global     | -1        | 3     | Education (years per capita)                        | 501             |
| Poisoning by other means       | Male   | 0-6 days  | 95+ years | Global     | -1        | 3     | Healthcare access and quality index                 | 536             |
| Poisoning by other means       | Male   | 0-6 days  | 95+ years | Global     | 0         | 3     | Socio-demographic Index                             | 524             |
| Poisoning by other means       | Male   | 0-6 days  | 95+ years | Global     | 0         | 3     | LDI (IS per capita)                                 | --              |
| Exposure to mechanical forces  | Female | 0-6 days  | 95+ years | Data Rich  | -1        | 2     | Healthcare access and quality index                 | 0               |
| Exposure to mechanical forces  | Female | 0-6 days  | 95+ years | Data Rich  | 0         | 2     | Population Density (under 150 ppl/sqkm, proportion) | 839             |
| Exposure to mechanical forces  | Female | 0-6 days  | 95+ years | Data Rich  | 0         | 2     | Population Density (over 1000 ppl/sqkm, proportion) | 968             |
| Exposure to mechanical forces  | Female | 0-6 days  | 95+ years | Data Rich  | 1         | 2     | Alcohol (liters per capita)                         | 7               |
| Exposure to mechanical forces  | Female | 0-6 days  | 95+ years | Data Rich  | -1        | 3     | Education (years per capita)                        | 0               |
| Exposure to mechanical forces  | Female | 0-6 days  | 95+ years | Data Rich  | -1        | 3     | Socio-demographic Index                             | 0               |
| Exposure to mechanical forces  | Female | 0-6 days  | 95+ years | Data Rich  | 0         | 3     | LDI (IS per capita)                                 | --              |
| Exposure to mechanical forces  | Female | 0-6 days  | 95+ years | Global     | -1        | 2     | Healthcare access and quality index                 | 847             |
| Exposure to mechanical forces  | Female | 0-6 days  | 95+ years | Global     | 0         | 2     | Population Density (under 150 ppl/sqkm, proportion) | 436             |
| Exposure to mechanical forces  | Female | 0-6 days  | 95+ years | Global     | 0         | 2     | Population Density (over 1000 ppl/sqkm, proportion) | 556             |
| Exposure to mechanical forces  | Female | 0-6 days  | 95+ years | Global     | 1         | 2     | Alcohol (liters per capita)                         | 258             |
| Exposure to mechanical forces  | Female | 0-6 days  | 95+ years | Global     | -1        | 3     | Education (years per capita)                        | 51              |
| Exposure to mechanical forces  | Female | 0-6 days  | 95+ years | Global     | -1        | 3     | Socio-demographic Index                             | 168             |
| Exposure to mechanical forces  | Female | 0-6 days  | 95+ years | Global     | 0         | 3     | LDI (IS per capita)                                 | --              |
| Exposure to mechanical forces  | Male   | 0-6 days  | 95+ years | Data Rich  | -1        | 2     | Healthcare access and quality index                 | 1000            |
| Exposure to mechanical forces  | Male   | 0-6 days  | 95+ years | Data Rich  | 0         | 2     | Population Density (under 150 ppl/sqkm, proportion) | 967             |
| Exposure to mechanical forces  | Male   | 0-6 days  | 95+ years | Data Rich  | 0         | 2     | Population Density (over 1000 ppl/sqkm, proportion) | 1000            |
| Exposure to mechanical forces  | Male   | 0-6 days  | 95+ years | Data Rich  | 1         | 2     | Alcohol (liters per capita)                         | 199             |
| Exposure to mechanical forces  | Male   | 0-6 days  | 95+ years | Data Rich  | -1        | 3     | Education (years per capita)                        | 0               |
| Exposure to mechanical forces  | Male   | 0-6 days  | 95+ years | Data Rich  | -1        | 3     | Socio-demographic Index                             | 161             |
| Exposure to mechanical forces  | Male   | 0-6 days  | 95+ years | Data Rich  | 0         | 3     | LDI (IS per capita)                                 | --              |
| Exposure to mechanical forces  | Male   | 0-6 days  | 95+ years | Global     | -1        | 2     | Healthcare access and quality index                 | 535             |
| Exposure to mechanical forces  | Male   | 0-6 days  | 95+ years | Global     | 0         | 2     | Population Density (under 150 ppl/sqkm, proportion) | 487             |
| Exposure to mechanical forces  | Male   | 0-6 days  | 95+ years | Global     | 0         | 2     | Population Density (over 1000 ppl/sqkm, proportion) | 694             |
| Exposure to mechanical forces  | Male   | 0-6 days  | 95+ years | Global     | 1         | 2     | Alcohol (liters per capita)                         | 482             |
| Exposure to mechanical forces  | Male   | 0-6 days  | 95+ years | Global     | -1        | 3     | Socio-demographic Index                             | 154             |
| Exposure to mechanical forces  | Male   | 0-6 days  | 95+ years | Global     | -1        | 3     | Education (years per capita)                        | 511             |
| Exposure to mechanical forces  | Male   | 0-6 days  | 95+ years | Global     | 0         | 3     | LDI (IS per capita)                                 | --              |
| Unintentional firearm injuries | Female | 0-6 days  | 95+ years | Data Rich  | 1         | 1     | Log-transformed SEV scalar: Mech Gun                | --              |
| Unintentional firearm injuries | Female | 0-6 days  | 95+ years | Data Rich  | -1        | 2     | Healthcare access and quality index                 | 689             |
| Unintentional firearm injuries | Female | 0-6 days  | 95+ years | Data Rich  | -1        | 2     | Health System Access (unitless)                     | --              |
| Unintentional firearm injuries | Female | 0-6 days  | 95+ years | Data Rich  | 1         | 2     | Alcohol (liters per capita)                         | --              |
| Unintentional firearm injuries | Female | 0-6 days  | 95+ years | Data Rich  | -1        | 3     | Socio-demographic Index                             | 150             |
| Unintentional firearm injuries | Female | 0-6 days  | 95+ years | Data Rich  | -1        | 3     | Education (years per capita)                        | --              |
| Unintentional firearm injuries | Female | 0-6 days  | 95+ years | Data Rich  | 0         | 3     | Population Density (over 1000 ppl/sqkm, proportion) | 235             |
| Unintentional firearm injuries | Female | 0-6 days  | 95+ years | Data Rich  | 0         | 3     | Population Density (under 150 ppl/sqkm, proportion) | 369             |
| Unintentional firearm injuries | Female | 0-6 days  | 95+ years | Data Rich  | 0         | 3     | LDI (IS per capita)                                 | --              |
| Unintentional firearm injuries | Female | 0-6 days  | 95+ years | Global     | 1         | 1     | Log-transformed SEV scalar: Mech Gun                | --              |
| Unintentional firearm injuries | Female | 0-6 days  | 95+ years | Global     | -1        | 2     | Healthcare access and quality index                 | 392             |
| Unintentional firearm injuries | Female | 0-6 days  | 95+ years | Global     | -1        | 2     | Health System Access (unitless)                     | --              |
| Unintentional firearm injuries | Female | 0-6 days  | 95+ years | Global     | 1         | 2     | Alcohol (liters per capita)                         | --              |
| Unintentional firearm injuries | Female | 0-6 days  | 95+ years | Global     | -1        | 3     | Education (years per capita)                        | 133             |
| Unintentional firearm injuries | Female | 0-6 days  | 95+ years | Global     | -1        | 3     | Socio-demographic Index                             | 475             |
| Unintentional firearm injuries | Female | 0-6 days  | 95+ years | Global     | 0         | 3     | Population Density (over 1000 ppl/sqkm, proportion) | 513             |
| Unintentional firearm injuries | Female | 0-6 days  | 95+ years | Global     | 0         | 3     | Population Density (under 150 ppl/sqkm, proportion) | 839             |
| Unintentional firearm injuries | Female | 0-6 days  | 95+ years | Global     | 0         | 3     | LDI (IS per capita)                                 | --              |
| Unintentional firearm injuries | Male   | 0-6 days  | 95+ years | Data Rich  | 1         | 1     | Log-transformed SEV scalar: Mech Gun                | --              |
| Unintentional firearm injuries | Male   | 0-6 days  | 95+ years | Data Rich  | -1        | 2     | Health System Access (unitless)                     | 725             |
| Unintentional firearm injuries | Male   | 0-6 days  | 95+ years | Data Rich  | -1        | 2     | Healthcare access and quality index                 | --              |
| Unintentional firearm injuries | Male   | 0-6 days  | 95+ years | Data Rich  | 1         | 2     | Alcohol (liters per capita)                         | 224             |
| Unintentional firearm injuries | Male   | 0-6 days  | 95+ years | Data Rich  | -1        | 3     | Socio-demographic Index                             | 48              |
| Unintentional firearm injuries | Male   | 0-6 days  | 95+ years | Data Rich  | -1        | 3     | Education (years per capita)                        | 188             |

**Appendix Table 9: CODEm covariates used, level of covariate, and expected direction of covariate by cause, sex, and age**

*Covariates that CODEm did not select during the covariate selection process have no draw counts listed.*

| Cause                                | Sex    | Age Start | Age End   | Model Type | Direction | Level | Covariate Name                                      | Number of Draws |
|--------------------------------------|--------|-----------|-----------|------------|-----------|-------|-----------------------------------------------------|-----------------|
| Unintentional firearm injuries       | Male   | 0-6 days  | 95+ years | Data Rich  | 0         | 3     | Population Density (under 150 ppl/sqkm, proportion) | 113             |
| Unintentional firearm injuries       | Male   | 0-6 days  | 95+ years | Data Rich  | 0         | 3     | Population Density (over 1000 ppl/sqkm, proportion) | 551             |
| Unintentional firearm injuries       | Male   | 0-6 days  | 95+ years | Data Rich  | 0         | 3     | LDI (IS per capita)                                 | --              |
| Unintentional firearm injuries       | Male   | 0-6 days  | 95+ years | Global     | 1         | 1     | Log-transformed SEV scalar: Mech Gun                | --              |
| Unintentional firearm injuries       | Male   | 0-6 days  | 95+ years | Global     | -1        | 2     | Health System Access (unitless)                     | 582             |
| Unintentional firearm injuries       | Male   | 0-6 days  | 95+ years | Global     | -1        | 2     | Healthcare access and quality index                 | 692             |
| Unintentional firearm injuries       | Male   | 0-6 days  | 95+ years | Global     | 1         | 2     | Alcohol (liters per capita)                         | 504             |
| Unintentional firearm injuries       | Male   | 0-6 days  | 95+ years | Global     | -1        | 3     | Education (years per capita)                        | 91              |
| Unintentional firearm injuries       | Male   | 0-6 days  | 95+ years | Global     | -1        | 3     | Socio-demographic Index                             | 373             |
| Unintentional firearm injuries       | Male   | 0-6 days  | 95+ years | Global     | 0         | 3     | Population Density (under 150 ppl/sqkm, proportion) | 383             |
| Unintentional firearm injuries       | Male   | 0-6 days  | 95+ years | Global     | 0         | 3     | Population Density (over 1000 ppl/sqkm, proportion) | 609             |
| Unintentional firearm injuries       | Male   | 0-6 days  | 95+ years | Global     | 0         | 3     | LDI (IS per capita)                                 | --              |
| Other exposure to mechanical forces  | Female | 0-6 days  | 95+ years | Data Rich  | 1         | 1     | Log-transformed SEV scalar: Oth Mech                | 1000            |
| Other exposure to mechanical forces  | Female | 0-6 days  | 95+ years | Data Rich  | -1        | 2     | Health System Access (unitless)                     | 132             |
| Other exposure to mechanical forces  | Female | 0-6 days  | 95+ years | Data Rich  | -1        | 2     | Healthcare access and quality index                 | 132             |
| Other exposure to mechanical forces  | Female | 0-6 days  | 95+ years | Data Rich  | 0         | 2     | Population Density (over 1000 ppl/sqkm, proportion) | 397             |
| Other exposure to mechanical forces  | Female | 0-6 days  | 95+ years | Data Rich  | 0         | 2     | Population Density (under 150 ppl/sqkm, proportion) | 397             |
| Other exposure to mechanical forces  | Female | 0-6 days  | 95+ years | Data Rich  | 1         | 2     | Alcohol (liters per capita)                         | 265             |
| Other exposure to mechanical forces  | Female | 0-6 days  | 95+ years | Data Rich  | -1        | 3     | Education (years per capita)                        | 6               |
| Other exposure to mechanical forces  | Female | 0-6 days  | 95+ years | Data Rich  | -1        | 3     | Socio-demographic Index                             | 14              |
| Other exposure to mechanical forces  | Female | 0-6 days  | 95+ years | Data Rich  | 0         | 3     | LDI (IS per capita)                                 | --              |
| Other exposure to mechanical forces  | Female | 0-6 days  | 95+ years | Global     | 1         | 1     | Log-transformed SEV scalar: Oth Mech                | --              |
| Other exposure to mechanical forces  | Female | 0-6 days  | 95+ years | Global     | -1        | 2     | Health System Access (unitless)                     | 354             |
| Other exposure to mechanical forces  | Female | 0-6 days  | 95+ years | Global     | -1        | 2     | Healthcare access and quality index                 | 354             |
| Other exposure to mechanical forces  | Female | 0-6 days  | 95+ years | Global     | 0         | 2     | Population Density (over 1000 ppl/sqkm, proportion) | 614             |
| Other exposure to mechanical forces  | Female | 0-6 days  | 95+ years | Global     | 0         | 2     | Population Density (under 150 ppl/sqkm, proportion) | 614             |
| Other exposure to mechanical forces  | Female | 0-6 days  | 95+ years | Global     | 1         | 2     | Alcohol (liters per capita)                         | 614             |
| Other exposure to mechanical forces  | Female | 0-6 days  | 95+ years | Global     | -1        | 3     | Education (years per capita)                        | 104             |
| Other exposure to mechanical forces  | Female | 0-6 days  | 95+ years | Global     | -1        | 3     | Socio-demographic Index                             | --              |
| Other exposure to mechanical forces  | Female | 0-6 days  | 95+ years | Global     | 0         | 3     | LDI (IS per capita)                                 | --              |
| Other exposure to mechanical forces  | Male   | 0-6 days  | 95+ years | Data Rich  | 1         | 1     | Log-transformed SEV scalar: Oth Mech                | 1000            |
| Other exposure to mechanical forces  | Male   | 0-6 days  | 95+ years | Data Rich  | -1        | 2     | Healthcare access and quality index                 | 804             |
| Other exposure to mechanical forces  | Male   | 0-6 days  | 95+ years | Data Rich  | -1        | 2     | Health System Access (unitless)                     | --              |
| Other exposure to mechanical forces  | Male   | 0-6 days  | 95+ years | Data Rich  | 0         | 2     | Population Density (over 1000 ppl/sqkm, proportion) | 812             |
| Other exposure to mechanical forces  | Male   | 0-6 days  | 95+ years | Data Rich  | 0         | 2     | Population Density (under 150 ppl/sqkm, proportion) | 812             |
| Other exposure to mechanical forces  | Male   | 0-6 days  | 95+ years | Data Rich  | 1         | 2     | Alcohol (liters per capita)                         | 8               |
| Other exposure to mechanical forces  | Male   | 0-6 days  | 95+ years | Data Rich  | -1        | 3     | Education (years per capita)                        | 251             |
| Other exposure to mechanical forces  | Male   | 0-6 days  | 95+ years | Data Rich  | -1        | 3     | Socio-demographic Index                             | 302             |
| Other exposure to mechanical forces  | Male   | 0-6 days  | 95+ years | Data Rich  | 0         | 3     | LDI (IS per capita)                                 | --              |
| Other exposure to mechanical forces  | Male   | 0-6 days  | 95+ years | Global     | 1         | 1     | Log-transformed SEV scalar: Oth Mech                | 773             |
| Other exposure to mechanical forces  | Male   | 0-6 days  | 95+ years | Global     | -1        | 2     | Health System Access (unitless)                     | 449             |
| Other exposure to mechanical forces  | Male   | 0-6 days  | 95+ years | Global     | -1        | 2     | Healthcare access and quality index                 | 449             |
| Other exposure to mechanical forces  | Male   | 0-6 days  | 95+ years | Global     | 0         | 2     | Population Density (over 1000 ppl/sqkm, proportion) | 449             |
| Other exposure to mechanical forces  | Male   | 0-6 days  | 95+ years | Global     | 0         | 2     | Population Density (under 150 ppl/sqkm, proportion) | 449             |
| Other exposure to mechanical forces  | Male   | 0-6 days  | 95+ years | Global     | 1         | 2     | Alcohol (liters per capita)                         | 449             |
| Other exposure to mechanical forces  | Male   | 0-6 days  | 95+ years | Global     | -1        | 3     | Education (years per capita)                        | 218             |
| Other exposure to mechanical forces  | Male   | 0-6 days  | 95+ years | Global     | -1        | 3     | Socio-demographic Index                             | 251             |
| Other exposure to mechanical forces  | Male   | 0-6 days  | 95+ years | Global     | 0         | 3     | LDI (IS per capita)                                 | --              |
| Adverse effects of medical treatment | Female | 0-6 days  | 95+ years | Data Rich  | 0         | 2     | Healthcare access and quality index                 | --              |
| Adverse effects of medical treatment | Female | 0-6 days  | 95+ years | Data Rich  | 0         | 3     | Socio-demographic Index                             | 166             |
| Adverse effects of medical treatment | Female | 0-6 days  | 95+ years | Data Rich  | 0         | 3     | LDI (IS per capita)                                 | --              |
| Adverse effects of medical treatment | Female | 0-6 days  | 95+ years | Global     | 0         | 2     | Healthcare access and quality index                 | 602             |
| Adverse effects of medical treatment | Female | 0-6 days  | 95+ years | Global     | 0         | 3     | Socio-demographic Index                             | 692             |
| Adverse effects of medical treatment | Female | 0-6 days  | 95+ years | Global     | 0         | 3     | LDI (IS per capita)                                 | --              |
| Adverse effects of medical treatment | Male   | 0-6 days  | 95+ years | Data Rich  | 0         | 2     | Healthcare access and quality index                 | --              |
| Adverse effects of medical treatment | Male   | 0-6 days  | 95+ years | Data Rich  | 0         | 3     | LDI (IS per capita)                                 | --              |
| Adverse effects of medical treatment | Male   | 0-6 days  | 95+ years | Data Rich  | 0         | 3     | Socio-demographic Index                             | --              |
| Adverse effects of medical treatment | Male   | 0-6 days  | 95+ years | Global     | 0         | 2     | Healthcare access and quality index                 | 602             |
| Adverse effects of medical treatment | Male   | 0-6 days  | 95+ years | Global     | 0         | 3     | Socio-demographic Index                             | 726             |
| Adverse effects of medical treatment | Male   | 0-6 days  | 95+ years | Global     | 0         | 3     | LDI (IS per capita)                                 | --              |
| Animal contact                       | Female | 0-6 days  | 95+ years | Data Rich  | 1         | 1     | Alcohol (liters per capita)                         | --              |
| Animal contact                       | Female | 0-6 days  | 95+ years | Data Rich  | 1         | 1     | Log-transformed SEV scalar: Animal                  | --              |
| Animal contact                       | Female | 0-6 days  | 95+ years | Data Rich  | -1        | 2     | Healthcare access and quality index                 | 38              |
| Animal contact                       | Female | 0-6 days  | 95+ years | Data Rich  | 1         | 2     | Population 15 to 30 (proportion)                    | 38              |
| Animal contact                       | Female | 0-6 days  | 95+ years | Data Rich  | -1        | 3     | Socio-demographic Index                             | 1               |
| Animal contact                       | Female | 0-6 days  | 95+ years | Data Rich  | -1        | 3     | Education (years per capita)                        | 160             |
| Animal contact                       | Female | 0-6 days  | 95+ years | Data Rich  | 0         | 3     | Elevation Over 1500m (proportion)                   | 192             |
| Animal contact                       | Female | 0-6 days  | 95+ years | Data Rich  | 0         | 3     | Population Density (over 1000 ppl/sqkm, proportion) | 801             |
| Animal contact                       | Female | 0-6 days  | 95+ years | Data Rich  | 0         | 3     | Population Density (under 150 ppl/sqkm, proportion) | 801             |
| Animal contact                       | Female | 0-6 days  | 95+ years | Data Rich  | 0         | 3     | Elevation Under 100m (proportion)                   | --              |
| Animal contact                       | Female | 0-6 days  | 95+ years | Data Rich  | 0         | 3     | LDI (IS per capita)                                 | --              |
| Animal contact                       | Female | 0-6 days  | 95+ years | Global     | 1         | 1     | Alcohol (liters per capita)                         | --              |
| Animal contact                       | Female | 0-6 days  | 95+ years | Global     | 1         | 1     | Log-transformed SEV scalar: Animal                  | --              |
| Animal contact                       | Female | 0-6 days  | 95+ years | Global     | -1        | 2     | Healthcare access and quality index                 | 424             |
| Animal contact                       | Female | 0-6 days  | 95+ years | Global     | 1         | 2     | Population 15 to 30 (proportion)                    | 424             |
| Animal contact                       | Female | 0-6 days  | 95+ years | Global     | -1        | 3     | Education (years per capita)                        | 133             |
| Animal contact                       | Female | 0-6 days  | 95+ years | Global     | -1        | 3     | Socio-demographic Index                             | 392             |
| Animal contact                       | Female | 0-6 days  | 95+ years | Global     | 0         | 3     | Population Density (over 1000 ppl/sqkm, proportion) | 282             |

**Appendix Table 9: CODEm covariates used, level of covariate, and expected direction of covariate by cause, sex, and age**

*Covariates that CODEm did not select during the covariate selection process have no draw counts listed.*

| Cause                       | Sex    | Age Start | Age End   | Model Type | Direction | Level | Covariate Name                                      | Number of Draws |
|-----------------------------|--------|-----------|-----------|------------|-----------|-------|-----------------------------------------------------|-----------------|
| Animal contact              | Female | 0-6 days  | 95+ years | Global     | 0         | 3     | Population Density (under 150 ppl/sqkm, proportion) | 282             |
| Animal contact              | Female | 0-6 days  | 95+ years | Global     | 0         | 3     | Elevation Over 1500m (proportion)                   | 513             |
| Animal contact              | Female | 0-6 days  | 95+ years | Global     | 0         | 3     | Elevation Under 100m (proportion)                   | 807             |
| Animal contact              | Female | 0-6 days  | 95+ years | Global     | 0         | 3     | LDI (IS per capita)                                 | --              |
| Animal contact              | Male   | 0-6 days  | 95+ years | Data Rich  | 1         | 1     | Alcohol (liters per capita)                         | 969             |
| Animal contact              | Male   | 0-6 days  | 95+ years | Data Rich  | 1         | 1     | Log-transformed SEV scalar: Animal                  | 993             |
| Animal contact              | Male   | 0-6 days  | 95+ years | Data Rich  | -1        | 2     | Healthcare access and quality index                 | 0               |
| Animal contact              | Male   | 0-6 days  | 95+ years | Data Rich  | 1         | 2     | Population 15 to 30 (proportion)                    | 0               |
| Animal contact              | Male   | 0-6 days  | 95+ years | Data Rich  | -1        | 3     | Education (years per capita)                        | 0               |
| Animal contact              | Male   | 0-6 days  | 95+ years | Data Rich  | -1        | 3     | Socio-demographic Index                             | 0               |
| Animal contact              | Male   | 0-6 days  | 95+ years | Data Rich  | 0         | 3     | Population Density (under 150 ppl/sqkm, proportion) | 1               |
| Animal contact              | Male   | 0-6 days  | 95+ years | Data Rich  | 0         | 3     | Elevation Under 100m (proportion)                   | 803             |
| Animal contact              | Male   | 0-6 days  | 95+ years | Data Rich  | 0         | 3     | Population Density (over 1000 ppl/sqkm, proportion) | 803             |
| Animal contact              | Male   | 0-6 days  | 95+ years | Data Rich  | 0         | 3     | Elevation Over 1500m (proportion)                   | 804             |
| Animal contact              | Male   | 0-6 days  | 95+ years | Data Rich  | 0         | 3     | LDI (IS per capita)                                 | --              |
| Animal contact              | Male   | 0-6 days  | 95+ years | Global     | 1         | 1     | Alcohol (liters per capita)                         | 491             |
| Animal contact              | Male   | 0-6 days  | 95+ years | Global     | 1         | 1     | Log-transformed SEV scalar: Animal                  | 509             |
| Animal contact              | Male   | 0-6 days  | 95+ years | Global     | -1        | 2     | Healthcare access and quality index                 | 170             |
| Animal contact              | Male   | 0-6 days  | 95+ years | Global     | 1         | 2     | Population 15 to 30 (proportion)                    | 161             |
| Animal contact              | Male   | 0-6 days  | 95+ years | Global     | -1        | 3     | Socio-demographic Index                             | 195             |
| Animal contact              | Male   | 0-6 days  | 95+ years | Global     | -1        | 3     | Education (years per capita)                        | 196             |
| Animal contact              | Male   | 0-6 days  | 95+ years | Global     | 0         | 3     | Elevation Over 1500m (proportion)                   | 114             |
| Animal contact              | Male   | 0-6 days  | 95+ years | Global     | 0         | 3     | Elevation Under 100m (proportion)                   | 207             |
| Animal contact              | Male   | 0-6 days  | 95+ years | Global     | 0         | 3     | Population Density (under 150 ppl/sqkm, proportion) | 352             |
| Animal contact              | Male   | 0-6 days  | 95+ years | Global     | 0         | 3     | Population Density (over 1000 ppl/sqkm, proportion) | 495             |
| Animal contact              | Male   | 0-6 days  | 95+ years | Global     | 0         | 3     | LDI (IS per capita)                                 | --              |
| Venomous animal contact     | Female | 0-6 days  | 95+ years | Data Rich  | 1         | 1     | Alcohol (liters per capita)                         | --              |
| Venomous animal contact     | Female | 0-6 days  | 95+ years | Data Rich  | 1         | 1     | Log-transformed SEV scalar: Venom                   | --              |
| Venomous animal contact     | Female | 0-6 days  | 95+ years | Data Rich  | -1        | 2     | Healthcare access and quality index                 | --              |
| Venomous animal contact     | Female | 0-6 days  | 95+ years | Data Rich  | -1        | 3     | Education (years per capita)                        | 181             |
| Venomous animal contact     | Female | 0-6 days  | 95+ years | Data Rich  | -1        | 3     | Socio-demographic Index                             | 181             |
| Venomous animal contact     | Female | 0-6 days  | 95+ years | Data Rich  | 0         | 3     | Elevation Over 1500m (proportion)                   | 819             |
| Venomous animal contact     | Female | 0-6 days  | 95+ years | Data Rich  | 0         | 3     | Elevation Under 100m (proportion)                   | 819             |
| Venomous animal contact     | Female | 0-6 days  | 95+ years | Data Rich  | 0         | 3     | Population Density (under 150 ppl/sqkm, proportion) | 1000            |
| Venomous animal contact     | Female | 0-6 days  | 95+ years | Data Rich  | 0         | 3     | LDI (IS per capita)                                 | --              |
| Venomous animal contact     | Female | 0-6 days  | 95+ years | Data Rich  | 0         | 3     | Population Density (over 1000 ppl/sqkm, proportion) | --              |
| Venomous animal contact     | Female | 0-6 days  | 95+ years | Global     | 1         | 1     | Alcohol (liters per capita)                         | --              |
| Venomous animal contact     | Female | 0-6 days  | 95+ years | Global     | 1         | 1     | Log-transformed SEV scalar: Venom                   | --              |
| Venomous animal contact     | Female | 0-6 days  | 95+ years | Global     | -1        | 2     | Healthcare access and quality index                 | --              |
| Venomous animal contact     | Female | 0-6 days  | 95+ years | Global     | -1        | 3     | Education (years per capita)                        | 546             |
| Venomous animal contact     | Female | 0-6 days  | 95+ years | Global     | -1        | 3     | Socio-demographic Index                             | 546             |
| Venomous animal contact     | Female | 0-6 days  | 95+ years | Global     | 0         | 3     | Elevation Under 100m (proportion)                   | 454             |
| Venomous animal contact     | Female | 0-6 days  | 95+ years | Global     | 0         | 3     | Population Density (over 1000 ppl/sqkm, proportion) | 454             |
| Venomous animal contact     | Female | 0-6 days  | 95+ years | Global     | 0         | 3     | Elevation Over 1500m (proportion)                   | --              |
| Venomous animal contact     | Female | 0-6 days  | 95+ years | Global     | 0         | 3     | LDI (IS per capita)                                 | --              |
| Venomous animal contact     | Female | 0-6 days  | 95+ years | Global     | 0         | 3     | Population Density (under 150 ppl/sqkm, proportion) | --              |
| Venomous animal contact     | Male   | 0-6 days  | 95+ years | Data Rich  | 1         | 1     | Log-transformed SEV scalar: Venom                   | 574             |
| Venomous animal contact     | Male   | 0-6 days  | 95+ years | Data Rich  | 1         | 1     | Alcohol (liters per capita)                         | 738             |
| Venomous animal contact     | Male   | 0-6 days  | 95+ years | Data Rich  | -1        | 2     | Healthcare access and quality index                 | 241             |
| Venomous animal contact     | Male   | 0-6 days  | 95+ years | Data Rich  | -1        | 3     | Socio-demographic Index                             | 21              |
| Venomous animal contact     | Male   | 0-6 days  | 95+ years | Data Rich  | -1        | 3     | Education (years per capita)                        | 86              |
| Venomous animal contact     | Male   | 0-6 days  | 95+ years | Data Rich  | 0         | 3     | Elevation Over 1500m (proportion)                   | 16              |
| Venomous animal contact     | Male   | 0-6 days  | 95+ years | Data Rich  | 0         | 3     | Elevation Under 100m (proportion)                   | 111             |
| Venomous animal contact     | Male   | 0-6 days  | 95+ years | Data Rich  | 0         | 3     | Population Density (under 150 ppl/sqkm, proportion) | 399             |
| Venomous animal contact     | Male   | 0-6 days  | 95+ years | Data Rich  | 0         | 3     | Population Density (over 1000 ppl/sqkm, proportion) | 466             |
| Venomous animal contact     | Male   | 0-6 days  | 95+ years | Data Rich  | 0         | 3     | LDI (IS per capita)                                 | --              |
| Venomous animal contact     | Male   | 0-6 days  | 95+ years | Global     | 1         | 1     | Log-transformed SEV scalar: Venom                   | 499             |
| Venomous animal contact     | Male   | 0-6 days  | 95+ years | Global     | 1         | 1     | Alcohol (liters per capita)                         | 661             |
| Venomous animal contact     | Male   | 0-6 days  | 95+ years | Global     | -1        | 2     | Healthcare access and quality index                 | 566             |
| Venomous animal contact     | Male   | 0-6 days  | 95+ years | Global     | -1        | 3     | Education (years per capita)                        | 125             |
| Venomous animal contact     | Male   | 0-6 days  | 95+ years | Global     | -1        | 3     | Socio-demographic Index                             | 225             |
| Venomous animal contact     | Male   | 0-6 days  | 95+ years | Global     | 0         | 3     | Population Density (under 150 ppl/sqkm, proportion) | 575             |
| Venomous animal contact     | Male   | 0-6 days  | 95+ years | Global     | 0         | 3     | Elevation Over 1500m (proportion)                   | 579             |
| Venomous animal contact     | Male   | 0-6 days  | 95+ years | Global     | 0         | 3     | Population Density (over 1000 ppl/sqkm, proportion) | 755             |
| Venomous animal contact     | Male   | 0-6 days  | 95+ years | Global     | 0         | 3     | Elevation Under 100m (proportion)                   | 780             |
| Venomous animal contact     | Male   | 0-6 days  | 95+ years | Global     | 0         | 3     | LDI (IS per capita)                                 | --              |
| Non-venomous animal contact | Female | 0-6 days  | 95+ years | Data Rich  | 1         | 1     | Alcohol (liters per capita)                         | 211             |
| Non-venomous animal contact | Female | 0-6 days  | 95+ years | Data Rich  | 1         | 1     | Log-transformed SEV scalar: Non Ven                 | --              |
| Non-venomous animal contact | Female | 0-6 days  | 95+ years | Data Rich  | -1        | 2     | Healthcare access and quality index                 | --              |
| Non-venomous animal contact | Female | 0-6 days  | 95+ years | Data Rich  | -1        | 3     | Education (years per capita)                        | --              |
| Non-venomous animal contact | Female | 0-6 days  | 95+ years | Data Rich  | -1        | 3     | Socio-demographic Index                             | --              |
| Non-venomous animal contact | Female | 0-6 days  | 95+ years | Data Rich  | 0         | 3     | Population Density (under 150 ppl/sqkm, proportion) | 39              |
| Non-venomous animal contact | Female | 0-6 days  | 95+ years | Data Rich  | 0         | 3     | Elevation Over 1500m (proportion)                   | 828             |
| Non-venomous animal contact | Female | 0-6 days  | 95+ years | Data Rich  | 0         | 3     | Elevation Under 100m (proportion)                   | 828             |
| Non-venomous animal contact | Female | 0-6 days  | 95+ years | Data Rich  | 0         | 3     | Population Density (over 1000 ppl/sqkm, proportion) | 828             |
| Non-venomous animal contact | Female | 0-6 days  | 95+ years | Data Rich  | 0         | 3     | LDI (IS per capita)                                 | --              |
| Non-venomous animal contact | Female | 0-6 days  | 95+ years | Global     | 1         | 1     | Alcohol (liters per capita)                         | 1000            |
| Non-venomous animal contact | Female | 0-6 days  | 95+ years | Global     | 1         | 1     | Log-transformed SEV scalar: Non Ven                 | --              |

**Appendix Table 9: CODEm covariates used, level of covariate, and expected direction of covariate by cause, sex, and age**

*Covariates that CODEm did not select during the covariate selection process have no draw counts listed.*

| Cause                                           | Sex    | Age Start | Age End   | Model Type | Direction | Level | Covariate Name                                      | Number of Draws |
|-------------------------------------------------|--------|-----------|-----------|------------|-----------|-------|-----------------------------------------------------|-----------------|
| Non-venomous animal contact                     | Female | 0-6 days  | 95+ years | Global     | -1        | 2     | Healthcare access and quality index                 | --              |
| Non-venomous animal contact                     | Female | 0-6 days  | 95+ years | Global     | -1        | 3     | Education (years per capita)                        | 161             |
| Non-venomous animal contact                     | Female | 0-6 days  | 95+ years | Global     | -1        | 3     | Socio-demographic Index                             | 193             |
| Non-venomous animal contact                     | Female | 0-6 days  | 95+ years | Global     | 0         | 3     | Elevation Over 1500m (proportion)                   | 282             |
| Non-venomous animal contact                     | Female | 0-6 days  | 95+ years | Global     | 0         | 3     | Population Density (over 1000 ppl/sqkm, proportion) | 282             |
| Non-venomous animal contact                     | Female | 0-6 days  | 95+ years | Global     | 0         | 3     | Elevation Under 100m (proportion)                   | 636             |
| Non-venomous animal contact                     | Female | 0-6 days  | 95+ years | Global     | 0         | 3     | Population Density (under 150 ppl/sqkm, proportion) | 636             |
| Non-venomous animal contact                     | Female | 0-6 days  | 95+ years | Global     | 0         | 3     | LDI (IS per capita)                                 | --              |
| Non-venomous animal contact                     | Male   | 0-6 days  | 95+ years | Data Rich  | 1         | 1     | Alcohol (liters per capita)                         | 468             |
| Non-venomous animal contact                     | Male   | 0-6 days  | 95+ years | Data Rich  | 1         | 1     | Log-transformed SEV scalar: Non Ven                 | --              |
| Non-venomous animal contact                     | Male   | 0-6 days  | 95+ years | Data Rich  | -1        | 2     | Healthcare access and quality index                 | 277             |
| Non-venomous animal contact                     | Male   | 0-6 days  | 95+ years | Data Rich  | -1        | 3     | Socio-demographic Index                             | 255             |
| Non-venomous animal contact                     | Male   | 0-6 days  | 95+ years | Data Rich  | -1        | 3     | Education (years per capita)                        | --              |
| Non-venomous animal contact                     | Male   | 0-6 days  | 95+ years | Data Rich  | 0         | 3     | Elevation Over 1500m (proportion)                   | 374             |
| Non-venomous animal contact                     | Male   | 0-6 days  | 95+ years | Data Rich  | 0         | 3     | Elevation Under 100m (proportion)                   | 643             |
| Non-venomous animal contact                     | Male   | 0-6 days  | 95+ years | Data Rich  | 0         | 3     | Population Density (over 1000 ppl/sqkm, proportion) | 643             |
| Non-venomous animal contact                     | Male   | 0-6 days  | 95+ years | Data Rich  | 0         | 3     | Population Density (under 150 ppl/sqkm, proportion) | 643             |
| Non-venomous animal contact                     | Male   | 0-6 days  | 95+ years | Data Rich  | 0         | 3     | LDI (IS per capita)                                 | --              |
| Non-venomous animal contact                     | Male   | 0-6 days  | 95+ years | Global     | 1         | 1     | Log-transformed SEV scalar: Non Ven                 | --              |
| Non-venomous animal contact                     | Male   | 0-6 days  | 95+ years | Global     | -1        | 3     | Education (years per capita)                        | 454             |
| Non-venomous animal contact                     | Male   | 0-6 days  | 95+ years | Global     | -1        | 3     | Healthcare access and quality index                 | 454             |
| Non-venomous animal contact                     | Male   | 0-6 days  | 95+ years | Global     | -1        | 3     | Socio-demographic Index                             | 454             |
| Non-venomous animal contact                     | Male   | 0-6 days  | 95+ years | Global     | 0         | 3     | LDI (IS per capita)                                 | --              |
| Non-venomous animal contact                     | Male   | 0-6 days  | 95+ years | Global     | 1         | 3     | Alcohol (liters per capita)                         | 546             |
| Foreign body                                    | Female | 0-6 days  | 95+ years | Data Rich  | 1         | 1     | LDI (IS per capita)                                 | 999             |
| Foreign body                                    | Female | 0-6 days  | 95+ years | Data Rich  | 1         | 1     | Education (years per capita)                        | 1000            |
| Foreign body                                    | Female | 0-6 days  | 95+ years | Data Rich  | 1         | 1     | Indoor Air Pollution (All Cooking Fuels)            | 1000            |
| Foreign body                                    | Female | 0-6 days  | 95+ years | Data Rich  | 1         | 1     | Population Over 65 (proportion)                     | 1000            |
| Foreign body                                    | Female | 0-6 days  | 95+ years | Data Rich  | 1         | 1     | Population Density (over 1000 ppl/sqkm, proportion) | --              |
| Foreign body                                    | Female | 0-6 days  | 95+ years | Data Rich  | -1        | 2     | Healthcare access and quality index                 | 165             |
| Foreign body                                    | Female | 0-6 days  | 95+ years | Data Rich  | 0         | 3     | Socio-demographic Index                             | 963             |
| Foreign body                                    | Female | 0-6 days  | 95+ years | Global     | 1         | 1     | Indoor Air Pollution (All Cooking Fuels)            | 55              |
| Foreign body                                    | Female | 0-6 days  | 95+ years | Global     | 1         | 1     | Population Over 65 (proportion)                     | 611             |
| Foreign body                                    | Female | 0-6 days  | 95+ years | Global     | 1         | 1     | LDI (IS per capita)                                 | 614             |
| Foreign body                                    | Female | 0-6 days  | 95+ years | Global     | 1         | 1     | Education (years per capita)                        | 748             |
| Foreign body                                    | Female | 0-6 days  | 95+ years | Global     | 1         | 1     | Population Density (over 1000 ppl/sqkm, proportion) | --              |
| Foreign body                                    | Female | 0-6 days  | 95+ years | Global     | -1        | 2     | Healthcare access and quality index                 | 34              |
| Foreign body                                    | Female | 0-6 days  | 95+ years | Global     | 0         | 3     | Socio-demographic Index                             | 539             |
| Foreign body                                    | Male   | 0-6 days  | 95+ years | Data Rich  | 1         | 1     | Education (years per capita)                        | 395             |
| Foreign body                                    | Male   | 0-6 days  | 95+ years | Data Rich  | 1         | 1     | Indoor Air Pollution (All Cooking Fuels)            | 992             |
| Foreign body                                    | Male   | 0-6 days  | 95+ years | Data Rich  | 1         | 1     | LDI (IS per capita)                                 | 1000            |
| Foreign body                                    | Male   | 0-6 days  | 95+ years | Data Rich  | 1         | 1     | Population Over 65 (proportion)                     | 1000            |
| Foreign body                                    | Male   | 0-6 days  | 95+ years | Data Rich  | 1         | 1     | Population Density (over 1000 ppl/sqkm, proportion) | --              |
| Foreign body                                    | Male   | 0-6 days  | 95+ years | Data Rich  | -1        | 2     | Healthcare access and quality index                 | 61              |
| Foreign body                                    | Male   | 0-6 days  | 95+ years | Data Rich  | 0         | 3     | Socio-demographic Index                             | 884             |
| Foreign body                                    | Male   | 0-6 days  | 95+ years | Global     | 1         | 1     | Population Density (over 1000 ppl/sqkm, proportion) | 21              |
| Foreign body                                    | Male   | 0-6 days  | 95+ years | Global     | 1         | 1     | Indoor Air Pollution (All Cooking Fuels)            | 467             |
| Foreign body                                    | Male   | 0-6 days  | 95+ years | Global     | 1         | 1     | Population Over 65 (proportion)                     | 614             |
| Foreign body                                    | Male   | 0-6 days  | 95+ years | Global     | 1         | 1     | LDI (IS per capita)                                 | 648             |
| Foreign body                                    | Male   | 0-6 days  | 95+ years | Global     | 1         | 1     | Education (years per capita)                        | 835             |
| Foreign body                                    | Male   | 0-6 days  | 95+ years | Global     | -1        | 2     | Healthcare access and quality index                 | --              |
| Foreign body                                    | Male   | 0-6 days  | 95+ years | Global     | 0         | 3     | Socio-demographic Index                             | 475             |
| Pulmonary aspiration and foreign body in airway | Female | 0-6 days  | 95+ years | Data Rich  | 1         | 1     | Log-transformed SEV scalar: F Body Asp              | --              |
| Pulmonary aspiration and foreign body in airway | Female | 0-6 days  | 95+ years | Data Rich  | -1        | 2     | Healthcare access and quality index                 | 32              |
| Pulmonary aspiration and foreign body in airway | Female | 0-6 days  | 95+ years | Data Rich  | 1         | 2     | Mean BMI                                            | 32              |
| Pulmonary aspiration and foreign body in airway | Female | 0-6 days  | 95+ years | Data Rich  | 1         | 2     | Alcohol (liters per capita)                         | --              |
| Pulmonary aspiration and foreign body in airway | Female | 0-6 days  | 95+ years | Data Rich  | 0         | 3     | Socio-demographic Index                             | 770             |
| Pulmonary aspiration and foreign body in airway | Female | 0-6 days  | 95+ years | Data Rich  | 0         | 3     | LDI (IS per capita)                                 | --              |
| Pulmonary aspiration and foreign body in airway | Female | 0-6 days  | 95+ years | Global     | 1         | 1     | Log-transformed SEV scalar: F Body Asp              | --              |
| Pulmonary aspiration and foreign body in airway | Female | 0-6 days  | 95+ years | Global     | -1        | 2     | Healthcare access and quality index                 | 264             |
| Pulmonary aspiration and foreign body in airway | Female | 0-6 days  | 95+ years | Global     | 1         | 2     | Alcohol binge drinker proportion, age-standardized  | 428             |
| Pulmonary aspiration and foreign body in airway | Female | 0-6 days  | 95+ years | Global     | 1         | 2     | Mean BMI                                            | 692             |
| Pulmonary aspiration and foreign body in airway | Female | 0-6 days  | 95+ years | Global     | 1         | 2     | Alcohol (liters per capita)                         | --              |
| Pulmonary aspiration and foreign body in airway | Female | 0-6 days  | 95+ years | Global     | -1        | 3     | Education (years per capita)                        | 100             |
| Pulmonary aspiration and foreign body in airway | Female | 0-6 days  | 95+ years | Global     | 0         | 3     | Socio-demographic Index                             | 352             |
| Pulmonary aspiration and foreign body in airway | Female | 0-6 days  | 95+ years | Global     | 0         | 3     | LDI (IS per capita)                                 | --              |
| Pulmonary aspiration and foreign body in airway | Male   | 0-6 days  | 95+ years | Data Rich  | 1         | 1     | Log-transformed SEV scalar: F Body Asp              | --              |
| Pulmonary aspiration and foreign body in airway | Male   | 0-6 days  | 95+ years | Data Rich  | -1        | 2     | Healthcare access and quality index                 | 250             |
| Pulmonary aspiration and foreign body in airway | Male   | 0-6 days  | 95+ years | Data Rich  | 1         | 2     | Mean BMI                                            | 750             |
| Pulmonary aspiration and foreign body in airway | Male   | 0-6 days  | 95+ years | Data Rich  | 1         | 2     | Alcohol (liters per capita)                         | 1000            |
| Pulmonary aspiration and foreign body in airway | Male   | 0-6 days  | 95+ years | Data Rich  | 0         | 3     | Socio-demographic Index                             | 1000            |
| Pulmonary aspiration and foreign body in airway | Male   | 0-6 days  | 95+ years | Data Rich  | 0         | 3     | LDI (IS per capita)                                 | --              |
| Pulmonary aspiration and foreign body in airway | Male   | 0-6 days  | 95+ years | Global     | 1         | 1     | Log-transformed SEV scalar: F Body Asp              | --              |
| Pulmonary aspiration and foreign body in airway | Male   | 0-6 days  | 95+ years | Global     | -1        | 2     | Healthcare access and quality index                 | 585             |
| Pulmonary aspiration and foreign body in airway | Male   | 0-6 days  | 95+ years | Global     | 1         | 2     | Alcohol (liters per capita)                         | 282             |
| Pulmonary aspiration and foreign body in airway | Male   | 0-6 days  | 95+ years | Global     | 1         | 2     | Mean BMI                                            | --              |
| Pulmonary aspiration and foreign body in airway | Male   | 0-6 days  | 95+ years | Global     | 0         | 3     | Socio-demographic Index                             | 475             |
| Pulmonary aspiration and foreign body in airway | Male   | 0-6 days  | 95+ years | Global     | 0         | 3     | LDI (IS per capita)                                 | --              |

**Appendix Table 9: CODEm covariates used, level of covariate, and expected direction of covariate by cause, sex, and age**

*Covariates that CODEm did not select during the covariate selection process have no draw counts listed.*

| Cause                                | Sex    | Age Start | Age End   | Model Type | Direction | Level | Covariate Name                                                  | Number of Draws |
|--------------------------------------|--------|-----------|-----------|------------|-----------|-------|-----------------------------------------------------------------|-----------------|
| Foreign body in other body part      | Female | 0-6 days  | 95+ years | Data Rich  | 1         | 1     | Alcohol (liters per capita)                                     | 889             |
| Foreign body in other body part      | Female | 0-6 days  | 95+ years | Data Rich  | 1         | 1     | Log-transformed SEV scalar: Oth F Body                          | --              |
| Foreign body in other body part      | Female | 0-6 days  | 95+ years | Data Rich  | -1        | 2     | Healthcare access and quality index                             | 298             |
| Foreign body in other body part      | Female | 0-6 days  | 95+ years | Data Rich  | -1        | 3     | Socio-demographic Index                                         | 239             |
| Foreign body in other body part      | Female | 0-6 days  | 95+ years | Data Rich  | -1        | 3     | Education (years per capita)                                    | --              |
| Foreign body in other body part      | Female | 0-6 days  | 95+ years | Data Rich  | 0         | 3     | Population Density (over 1000 ppl/sqkm, proportion)             | 290             |
| Foreign body in other body part      | Female | 0-6 days  | 95+ years | Data Rich  | 0         | 3     | Elevation Over 1500m (proportion)                               | 350             |
| Foreign body in other body part      | Female | 0-6 days  | 95+ years | Data Rich  | 0         | 3     | Elevation Under 100m (proportion)                               | 418             |
| Foreign body in other body part      | Female | 0-6 days  | 95+ years | Data Rich  | 0         | 3     | Population Density (under 150 ppl/sqkm, proportion)             | 529             |
| Foreign body in other body part      | Female | 0-6 days  | 95+ years | Data Rich  | 0         | 3     | LDI (US per capita)                                             | --              |
| Foreign body in other body part      | Female | 0-6 days  | 95+ years | Global     | 1         | 1     | Alcohol (liters per capita)                                     | 1000            |
| Foreign body in other body part      | Female | 0-6 days  | 95+ years | Global     | 1         | 1     | Log-transformed SEV scalar: Oth F Body                          | --              |
| Foreign body in other body part      | Female | 0-6 days  | 95+ years | Global     | -1        | 2     | Healthcare access and quality index                             | 293             |
| Foreign body in other body part      | Female | 0-6 days  | 95+ years | Global     | -1        | 3     | Education (years per capita)                                    | 92              |
| Foreign body in other body part      | Female | 0-6 days  | 95+ years | Global     | -1        | 3     | Socio-demographic Index                                         | 111             |
| Foreign body in other body part      | Female | 0-6 days  | 95+ years | Global     | 0         | 3     | Elevation Over 1500m (proportion)                               | 388             |
| Foreign body in other body part      | Female | 0-6 days  | 95+ years | Global     | 0         | 3     | Population Density (under 150 ppl/sqkm, proportion)             | 388             |
| Foreign body in other body part      | Female | 0-6 days  | 95+ years | Global     | 0         | 3     | Elevation Under 100m (proportion)                               | 591             |
| Foreign body in other body part      | Female | 0-6 days  | 95+ years | Global     | 0         | 3     | Population Density (over 1000 ppl/sqkm, proportion)             | 591             |
| Foreign body in other body part      | Female | 0-6 days  | 95+ years | Global     | 0         | 3     | LDI (US per capita)                                             | --              |
| Foreign body in other body part      | Male   | 0-6 days  | 95+ years | Data Rich  | 1         | 1     | Alcohol (liters per capita)                                     | 968             |
| Foreign body in other body part      | Male   | 0-6 days  | 95+ years | Data Rich  | 1         | 1     | Log-transformed SEV scalar: Oth F Body                          | --              |
| Foreign body in other body part      | Male   | 0-6 days  | 95+ years | Data Rich  | -1        | 2     | Healthcare access and quality index                             | 153             |
| Foreign body in other body part      | Male   | 0-6 days  | 95+ years | Data Rich  | -1        | 3     | Socio-demographic Index                                         | 249             |
| Foreign body in other body part      | Male   | 0-6 days  | 95+ years | Data Rich  | -1        | 3     | Education (years per capita)                                    | --              |
| Foreign body in other body part      | Male   | 0-6 days  | 95+ years | Data Rich  | 0         | 3     | Elevation Under 100m (proportion)                               | 46              |
| Foreign body in other body part      | Male   | 0-6 days  | 95+ years | Data Rich  | 0         | 3     | Population Density (under 150 ppl/sqkm, proportion)             | 69              |
| Foreign body in other body part      | Male   | 0-6 days  | 95+ years | Data Rich  | 0         | 3     | Population Density (over 1000 ppl/sqkm, proportion)             | 355             |
| Foreign body in other body part      | Male   | 0-6 days  | 95+ years | Data Rich  | 0         | 3     | Elevation Over 1500m (proportion)                               | 409             |
| Foreign body in other body part      | Male   | 0-6 days  | 95+ years | Data Rich  | 0         | 3     | LDI (US per capita)                                             | --              |
| Foreign body in other body part      | Male   | 0-6 days  | 95+ years | Global     | 1         | 1     | Alcohol (liters per capita)                                     | 636             |
| Foreign body in other body part      | Male   | 0-6 days  | 95+ years | Global     | 1         | 1     | Log-transformed SEV scalar: Oth F Body                          | --              |
| Foreign body in other body part      | Male   | 0-6 days  | 95+ years | Global     | -1        | 2     | Healthcare access and quality index                             | 264             |
| Foreign body in other body part      | Male   | 0-6 days  | 95+ years | Global     | -1        | 3     | Socio-demographic Index                                         | 100             |
| Foreign body in other body part      | Male   | 0-6 days  | 95+ years | Global     | -1        | 3     | Education (years per capita)                                    | --              |
| Foreign body in other body part      | Male   | 0-6 days  | 95+ years | Global     | 0         | 3     | Population Density (under 150 ppl/sqkm, proportion)             | 426             |
| Foreign body in other body part      | Male   | 0-6 days  | 95+ years | Global     | 0         | 3     | Elevation Over 1500m (proportion)                               | 437             |
| Foreign body in other body part      | Male   | 0-6 days  | 95+ years | Global     | 0         | 3     | Population Density (over 1000 ppl/sqkm, proportion)             | 499             |
| Foreign body in other body part      | Male   | 0-6 days  | 95+ years | Global     | 0         | 3     | Elevation Under 100m (proportion)                               | 581             |
| Foreign body in other body part      | Male   | 0-6 days  | 95+ years | Global     | 0         | 3     | LDI (US per capita)                                             | --              |
| Environmental heat and cold exposure | Female | 0-6 days  | 95+ years | Data Rich  | -1        | 2     | Healthcare access and quality index                             | 1000            |
| Environmental heat and cold exposure | Female | 0-6 days  | 95+ years | Data Rich  | -1        | 3     | Education (years per capita)                                    | 6               |
| Environmental heat and cold exposure | Female | 0-6 days  | 95+ years | Data Rich  | -1        | 3     | Socio-demographic Index                                         | --              |
| Environmental heat and cold exposure | Female | 0-6 days  | 95+ years | Data Rich  | 0         | 3     | Elevation Over 1500m (proportion)                               | 6               |
| Environmental heat and cold exposure | Female | 0-6 days  | 95+ years | Data Rich  | 0         | 3     | LDI (US per capita)                                             | 6               |
| Environmental heat and cold exposure | Female | 0-6 days  | 95+ years | Data Rich  | 0         | 3     | Population-weighted mean temperature                            | 161             |
| Environmental heat and cold exposure | Female | 0-6 days  | 95+ years | Data Rich  | 0         | 3     | Sanitation (proportion with access)                             | 161             |
| Environmental heat and cold exposure | Female | 0-6 days  | 95+ years | Data Rich  | 0         | 3     | 90th percentile climatic temperature in the given country-year. | 167             |
| Environmental heat and cold exposure | Female | 0-6 days  | 95+ years | Data Rich  | 0         | 3     | Elevation 500 to 1500m (proportion)                             | 167             |
| Environmental heat and cold exposure | Female | 0-6 days  | 95+ years | Data Rich  | 0         | 3     | Population Density (150-300 ppl/sqkm, proportion)               | 167             |
| Environmental heat and cold exposure | Female | 0-6 days  | 95+ years | Data Rich  | 0         | 3     | Rainfall (Quintiles 4-5)                                        | 167             |
| Environmental heat and cold exposure | Female | 0-6 days  | 95+ years | Global     | -1        | 2     | Healthcare access and quality index                             | 1000            |
| Environmental heat and cold exposure | Female | 0-6 days  | 95+ years | Global     | -1        | 3     | Education (years per capita)                                    | 196             |
| Environmental heat and cold exposure | Female | 0-6 days  | 95+ years | Global     | -1        | 3     | Socio-demographic Index                                         | 231             |
| Environmental heat and cold exposure | Female | 0-6 days  | 95+ years | Global     | 0         | 3     | Population-weighted mean temperature                            | 107             |
| Environmental heat and cold exposure | Female | 0-6 days  | 95+ years | Global     | 0         | 3     | LDI (US per capita)                                             | 200             |
| Environmental heat and cold exposure | Female | 0-6 days  | 95+ years | Global     | 0         | 3     | Sanitation (proportion with access)                             | 200             |
| Environmental heat and cold exposure | Female | 0-6 days  | 95+ years | Global     | 0         | 3     | Elevation Over 1500m (proportion)                               | 299             |
| Environmental heat and cold exposure | Female | 0-6 days  | 95+ years | Global     | 0         | 3     | Population Density (150-300 ppl/sqkm, proportion)               | 320             |
| Environmental heat and cold exposure | Female | 0-6 days  | 95+ years | Global     | 0         | 3     | Elevation 500 to 1500m (proportion)                             | 324             |
| Environmental heat and cold exposure | Female | 0-6 days  | 95+ years | Global     | 0         | 3     | 90th percentile climatic temperature in the given country-year. | --              |
| Environmental heat and cold exposure | Female | 0-6 days  | 95+ years | Global     | 0         | 3     | Rainfall (Quintiles 4-5)                                        | --              |
| Environmental heat and cold exposure | Male   | 0-6 days  | 95+ years | Data Rich  | -1        | 2     | Healthcare access and quality index                             | 1000            |
| Environmental heat and cold exposure | Male   | 0-6 days  | 95+ years | Data Rich  | -1        | 3     | Education (years per capita)                                    | --              |
| Environmental heat and cold exposure | Male   | 0-6 days  | 95+ years | Data Rich  | -1        | 3     | Socio-demographic Index                                         | --              |
| Environmental heat and cold exposure | Male   | 0-6 days  | 95+ years | Data Rich  | 0         | 3     | Rainfall (Quintiles 4-5)                                        | 15              |
| Environmental heat and cold exposure | Male   | 0-6 days  | 95+ years | Data Rich  | 0         | 3     | LDI (US per capita)                                             | 62              |
| Environmental heat and cold exposure | Male   | 0-6 days  | 95+ years | Data Rich  | 0         | 3     | Population-weighted mean temperature                            | 62              |
| Environmental heat and cold exposure | Male   | 0-6 days  | 95+ years | Data Rich  | 0         | 3     | Elevation 500 to 1500m (proportion)                             | 132             |
| Environmental heat and cold exposure | Male   | 0-6 days  | 95+ years | Data Rich  | 0         | 3     | 90th percentile climatic temperature in the given country-year. | 253             |
| Environmental heat and cold exposure | Male   | 0-6 days  | 95+ years | Data Rich  | 0         | 3     | Population Density (150-300 ppl/sqkm, proportion)               | 385             |
| Environmental heat and cold exposure | Male   | 0-6 days  | 95+ years | Data Rich  | 0         | 3     | Elevation Over 1500m (proportion)                               | --              |
| Environmental heat and cold exposure | Male   | 0-6 days  | 95+ years | Data Rich  | 0         | 3     | Sanitation (proportion with access)                             | --              |
| Environmental heat and cold exposure | Male   | 0-6 days  | 95+ years | Global     | -1        | 2     | Healthcare access and quality index                             | 674             |
| Environmental heat and cold exposure | Male   | 0-6 days  | 95+ years | Global     | -1        | 3     | Education (years per capita)                                    | 566             |
| Environmental heat and cold exposure | Male   | 0-6 days  | 95+ years | Global     | -1        | 3     | Socio-demographic Index                                         | --              |
| Environmental heat and cold exposure | Male   | 0-6 days  | 95+ years | Global     | 0         | 3     | Elevation 500 to 1500m (proportion)                             | 326             |
| Environmental heat and cold exposure | Male   | 0-6 days  | 95+ years | Global     | 0         | 3     | Elevation Over 1500m (proportion)                               | 326             |



**Appendix Table 9: CODEm covariates used, level of covariate, and expected direction of covariate by cause, sex, and age**

*Covariates that CODEm did not select during the covariate selection process have no draw counts listed.*

| Cause                                | Sex    | Age Start | Age End   | Model Type | Direction | Level | Covariate Name                                                  | Number of Draws |
|--------------------------------------|--------|-----------|-----------|------------|-----------|-------|-----------------------------------------------------------------|-----------------|
| Environmental heat and cold exposure | Male   | 0-6 days  | 95+ years | Global     | 0         | 3     | LDI (IS per capita)                                             | 326             |
| Environmental heat and cold exposure | Male   | 0-6 days  | 95+ years | Global     | 0         | 3     | Population Density (150-300 ppl/sqkm, proportion)               | 326             |
| Environmental heat and cold exposure | Male   | 0-6 days  | 95+ years | Global     | 0         | 3     | Sanitation (proportion with access)                             | 452             |
| Environmental heat and cold exposure | Male   | 0-6 days  | 95+ years | Global     | 0         | 3     | 90th percentile climatic temperature in the given country-year. | 538             |
| Environmental heat and cold exposure | Male   | 0-6 days  | 95+ years | Global     | 0         | 3     | Population-weighted mean temperature                            | 538             |
| Environmental heat and cold exposure | Male   | 0-6 days  | 95+ years | Global     | 0         | 3     | Rainfall (Quintiles 4-5)                                        | --              |
| Other unintentional injuries         | Female | 0-6 days  | 95+ years | Data Rich  | 0         | 1     | Vehicles - 4 wheels (per capita)                                | 1000            |
| Other unintentional injuries         | Female | 0-6 days  | 95+ years | Data Rich  | 1         | 1     | Alcohol (liters per capita)                                     | 0               |
| Other unintentional injuries         | Female | 0-6 days  | 95+ years | Data Rich  | 1         | 1     | Vehicles - 2 wheels (per capita)                                | 1000            |
| Other unintentional injuries         | Female | 0-6 days  | 95+ years | Data Rich  | 1         | 1     | Log-transformed SEV scalar: Oth Unint                           | --              |
| Other unintentional injuries         | Female | 0-6 days  | 95+ years | Data Rich  | -1        | 2     | Healthcare access and quality index                             | 834             |
| Other unintentional injuries         | Female | 0-6 days  | 95+ years | Data Rich  | -1        | 3     | Education (years per capita)                                    | 1000            |
| Other unintentional injuries         | Female | 0-6 days  | 95+ years | Data Rich  | 0         | 3     | Population Density (over 1000 ppl/sqkm, proportion)             | 166             |
| Other unintentional injuries         | Female | 0-6 days  | 95+ years | Data Rich  | 0         | 3     | Population Density (under 150 ppl/sqkm, proportion)             | 198             |
| Other unintentional injuries         | Female | 0-6 days  | 95+ years | Data Rich  | 0         | 3     | Socio-demographic Index                                         | 962             |
| Other unintentional injuries         | Female | 0-6 days  | 95+ years | Data Rich  | 0         | 3     | Elevation Under 100m (proportion)                               | 999             |
| Other unintentional injuries         | Female | 0-6 days  | 95+ years | Data Rich  | 0         | 3     | Elevation Over 1500m (proportion)                               | 1000            |
| Other unintentional injuries         | Female | 0-6 days  | 95+ years | Data Rich  | 0         | 3     | LDI (IS per capita)                                             | --              |
| Other unintentional injuries         | Female | 0-6 days  | 95+ years | Global     | 0         | 1     | Vehicles - 4 wheels (per capita)                                | 668             |
| Other unintentional injuries         | Female | 0-6 days  | 95+ years | Global     | 1         | 1     | Alcohol (liters per capita)                                     | 509             |
| Other unintentional injuries         | Female | 0-6 days  | 95+ years | Global     | 1         | 1     | Vehicles - 2 wheels (per capita)                                | 551             |
| Other unintentional injuries         | Female | 0-6 days  | 95+ years | Global     | 1         | 1     | Log-transformed SEV scalar: Oth Unint                           | --              |
| Other unintentional injuries         | Female | 0-6 days  | 95+ years | Global     | -1        | 2     | Healthcare access and quality index                             | 277             |
| Other unintentional injuries         | Female | 0-6 days  | 95+ years | Global     | -1        | 3     | Education (years per capita)                                    | 717             |
| Other unintentional injuries         | Female | 0-6 days  | 95+ years | Global     | 0         | 3     | Elevation Under 100m (proportion)                               | 463             |
| Other unintentional injuries         | Female | 0-6 days  | 95+ years | Global     | 0         | 3     | Population Density (over 1000 ppl/sqkm, proportion)             | 680             |
| Other unintentional injuries         | Female | 0-6 days  | 95+ years | Global     | 0         | 3     | Population Density (under 150 ppl/sqkm, proportion)             | 700             |
| Other unintentional injuries         | Female | 0-6 days  | 95+ years | Global     | 0         | 3     | Elevation Over 1500m (proportion)                               | 797             |
| Other unintentional injuries         | Female | 0-6 days  | 95+ years | Global     | 0         | 3     | Socio-demographic Index                                         | 821             |
| Other unintentional injuries         | Female | 0-6 days  | 95+ years | Global     | 0         | 3     | LDI (IS per capita)                                             | --              |
| Other unintentional injuries         | Male   | 0-6 days  | 95+ years | Data Rich  | 0         | 1     | Vehicles - 4 wheels (per capita)                                | 1000            |
| Other unintentional injuries         | Male   | 0-6 days  | 95+ years | Data Rich  | 1         | 1     | Alcohol (liters per capita)                                     | 189             |
| Other unintentional injuries         | Male   | 0-6 days  | 95+ years | Data Rich  | 1         | 1     | Vehicles - 2 wheels (per capita)                                | 1000            |
| Other unintentional injuries         | Male   | 0-6 days  | 95+ years | Data Rich  | 1         | 1     | Log-transformed SEV scalar: Oth Unint                           | --              |
| Other unintentional injuries         | Male   | 0-6 days  | 95+ years | Data Rich  | -1        | 2     | Healthcare access and quality index                             | 765             |
| Other unintentional injuries         | Male   | 0-6 days  | 95+ years | Data Rich  | -1        | 3     | Education (years per capita)                                    | 765             |
| Other unintentional injuries         | Male   | 0-6 days  | 95+ years | Data Rich  | 0         | 3     | Population Density (over 1000 ppl/sqkm, proportion)             | 233             |
| Other unintentional injuries         | Male   | 0-6 days  | 95+ years | Data Rich  | 0         | 3     | Elevation Under 100m (proportion)                               | 811             |
| Other unintentional injuries         | Male   | 0-6 days  | 95+ years | Data Rich  | 0         | 3     | Elevation Over 1500m (proportion)                               | 989             |
| Other unintentional injuries         | Male   | 0-6 days  | 95+ years | Data Rich  | 0         | 3     | Population Density (under 150 ppl/sqkm, proportion)             | 1000            |
| Other unintentional injuries         | Male   | 0-6 days  | 95+ years | Data Rich  | 0         | 3     | Socio-demographic Index                                         | 1000            |
| Other unintentional injuries         | Male   | 0-6 days  | 95+ years | Data Rich  | 0         | 3     | LDI (IS per capita)                                             | --              |
| Other unintentional injuries         | Male   | 0-6 days  | 95+ years | Global     | 0         | 1     | Vehicles - 4 wheels (per capita)                                | 1000            |
| Other unintentional injuries         | Male   | 0-6 days  | 95+ years | Global     | 1         | 1     | Alcohol (liters per capita)                                     | 401             |
| Other unintentional injuries         | Male   | 0-6 days  | 95+ years | Global     | 1         | 1     | Vehicles - 2 wheels (per capita)                                | 922             |
| Other unintentional injuries         | Male   | 0-6 days  | 95+ years | Global     | 1         | 1     | Log-transformed SEV scalar: Oth Unint                           | --              |
| Other unintentional injuries         | Male   | 0-6 days  | 95+ years | Global     | -1        | 2     | Healthcare access and quality index                             | 156             |
| Other unintentional injuries         | Male   | 0-6 days  | 95+ years | Global     | -1        | 3     | Education (years per capita)                                    | 724             |
| Other unintentional injuries         | Male   | 0-6 days  | 95+ years | Global     | 0         | 3     | Population Density (over 1000 ppl/sqkm, proportion)             | 116             |
| Other unintentional injuries         | Male   | 0-6 days  | 95+ years | Global     | 0         | 3     | Elevation Under 100m (proportion)                               | 603             |
| Other unintentional injuries         | Male   | 0-6 days  | 95+ years | Global     | 0         | 3     | Socio-demographic Index                                         | 605             |
| Other unintentional injuries         | Male   | 0-6 days  | 95+ years | Global     | 0         | 3     | Population Density (under 150 ppl/sqkm, proportion)             | 735             |
| Other unintentional injuries         | Male   | 0-6 days  | 95+ years | Global     | 0         | 3     | Elevation Over 1500m (proportion)                               | 890             |
| Other unintentional injuries         | Male   | 0-6 days  | 95+ years | Global     | 0         | 3     | LDI (IS per capita)                                             | --              |
| Self-harm and interpersonal violence | Female | 0-6 days  | 95+ years | Data Rich  | 1         | 1     | Healthcare access and quality index                             | 940             |
| Self-harm and interpersonal violence | Female | 0-6 days  | 95+ years | Data Rich  | 1         | 1     | Alcohol (liters per capita)                                     | --              |
| Self-harm and interpersonal violence | Female | 0-6 days  | 95+ years | Data Rich  | 1         | 1     | Log-transformed SEV scalar: Oth Unint                           | --              |
| Self-harm and interpersonal violence | Female | 0-6 days  | 95+ years | Data Rich  | -1        | 3     | Education (years per capita)                                    | 641             |
| Self-harm and interpersonal violence | Female | 0-6 days  | 95+ years | Data Rich  | 0         | 3     | Population Density (under 150 ppl/sqkm, proportion)             | 323             |
| Self-harm and interpersonal violence | Female | 0-6 days  | 95+ years | Data Rich  | 0         | 3     | Population Density (over 1000 ppl/sqkm, proportion)             | 407             |
| Self-harm and interpersonal violence | Female | 0-6 days  | 95+ years | Data Rich  | 0         | 3     | Elevation Under 100m (proportion)                               | 692             |
| Self-harm and interpersonal violence | Female | 0-6 days  | 95+ years | Data Rich  | 0         | 3     | Elevation Over 1500m (proportion)                               | 859             |
| Self-harm and interpersonal violence | Female | 0-6 days  | 95+ years | Data Rich  | 0         | 3     | LDI (IS per capita)                                             | --              |
| Self-harm and interpersonal violence | Female | 0-6 days  | 95+ years | Global     | 1         | 1     | Healthcare access and quality index                             | 403             |
| Self-harm and interpersonal violence | Female | 0-6 days  | 95+ years | Global     | 1         | 1     | Alcohol (liters per capita)                                     | 883             |
| Self-harm and interpersonal violence | Female | 0-6 days  | 95+ years | Global     | 1         | 1     | Log-transformed SEV scalar: Oth Unint                           | --              |
| Self-harm and interpersonal violence | Female | 0-6 days  | 95+ years | Global     | -1        | 3     | Education (years per capita)                                    | 117             |
| Self-harm and interpersonal violence | Female | 0-6 days  | 95+ years | Global     | 0         | 3     | Population Density (over 1000 ppl/sqkm, proportion)             | 366             |
| Self-harm and interpersonal violence | Female | 0-6 days  | 95+ years | Global     | 0         | 3     | Elevation Under 100m (proportion)                               | 442             |
| Self-harm and interpersonal violence | Female | 0-6 days  | 95+ years | Global     | 0         | 3     | Elevation Over 1500m (proportion)                               | 559             |
| Self-harm and interpersonal violence | Female | 0-6 days  | 95+ years | Global     | 0         | 3     | Population Density (under 150 ppl/sqkm, proportion)             | 559             |
| Self-harm and interpersonal violence | Female | 0-6 days  | 95+ years | Global     | 0         | 3     | LDI (IS per capita)                                             | --              |
| Self-harm and interpersonal violence | Male   | 0-6 days  | 95+ years | Data Rich  | 1         | 1     | Healthcare access and quality index                             | 726             |
| Self-harm and interpersonal violence | Male   | 0-6 days  | 95+ years | Data Rich  | 1         | 1     | Alcohol (liters per capita)                                     | --              |
| Self-harm and interpersonal violence | Male   | 0-6 days  | 95+ years | Data Rich  | 1         | 1     | Log-transformed SEV scalar: Oth Unint                           | --              |
| Self-harm and interpersonal violence | Male   | 0-6 days  | 95+ years | Data Rich  | -1        | 3     | Education (years per capita)                                    | 274             |
| Self-harm and interpersonal violence | Male   | 0-6 days  | 95+ years | Data Rich  | 0         | 3     | Elevation Under 100m (proportion)                               | 274             |
| Self-harm and interpersonal violence | Male   | 0-6 days  | 95+ years | Data Rich  | 0         | 3     | Elevation Over 1500m (proportion)                               | 627             |

**Appendix Table 9: CODEm covariates used, level of covariate, and expected direction of covariate by cause, sex, and age**

*Covariates that CODEm did not select during the covariate selection process have no draw counts listed.*

| Cause                                | Sex    | Age Start   | Age End   | Model Type | Direction | Level | Covariate Name                                                   | Number of Draws |
|--------------------------------------|--------|-------------|-----------|------------|-----------|-------|------------------------------------------------------------------|-----------------|
| Self-harm and interpersonal violence | Male   | 0-6 days    | 95+ years | Data Rich  | 0         | 3     | Population Density (over 1000 ppl/sqkm, proportion)              | 627             |
| Self-harm and interpersonal violence | Male   | 0-6 days    | 95+ years | Data Rich  | 0         | 3     | Population Density (under 150 ppl/sqkm, proportion)              | 627             |
| Self-harm and interpersonal violence | Male   | 0-6 days    | 95+ years | Data Rich  | 0         | 3     | LDI (IS per capita)                                              | --              |
| Self-harm and interpersonal violence | Male   | 0-6 days    | 95+ years | Global     | 1         | 1     | Healthcare access and quality index                              | 780             |
| Self-harm and interpersonal violence | Male   | 0-6 days    | 95+ years | Global     | 1         | 1     | Alcohol (liters per capita)                                      | --              |
| Self-harm and interpersonal violence | Male   | 0-6 days    | 95+ years | Global     | 1         | 1     | Log-transformed SEV scalar: Oth Unint                            | --              |
| Self-harm and interpersonal violence | Male   | 0-6 days    | 95+ years | Global     | -1        | 3     | Education (years per capita)                                     | --              |
| Self-harm and interpersonal violence | Male   | 0-6 days    | 95+ years | Global     | 0         | 3     | Elevation Over 1500m (proportion)                                | 353             |
| Self-harm and interpersonal violence | Male   | 0-6 days    | 95+ years | Global     | 0         | 3     | Population Density (under 150 ppl/sqkm, proportion)              | 353             |
| Self-harm and interpersonal violence | Male   | 0-6 days    | 95+ years | Global     | 0         | 3     | Elevation Under 100m (proportion)                                | 573             |
| Self-harm and interpersonal violence | Male   | 0-6 days    | 95+ years | Global     | 0         | 3     | Population Density (over 1000 ppl/sqkm, proportion)              | 573             |
| Self-harm and interpersonal violence | Male   | 0-6 days    | 95+ years | Global     | 0         | 3     | LDI (IS per capita)                                              | --              |
| Self-harm                            | Female | 10-14 years | 95+ years | Data Rich  | 1         | 1     | Log-transformed SEV scalar: Self Harm                            | 0               |
| Self-harm                            | Female | 10-14 years | 95+ years | Data Rich  | 1         | 1     | Alcohol (liters per capita)                                      | 38              |
| Self-harm                            | Female | 10-14 years | 95+ years | Data Rich  | 1         | 1     | Major depressive disorder                                        | 1000            |
| Self-harm                            | Female | 10-14 years | 95+ years | Data Rich  | -1        | 2     | Healthcare access and quality index                              | 0               |
| Self-harm                            | Female | 10-14 years | 95+ years | Data Rich  | -1        | 2     | Religion (binary, >50% Muslim)                                   | --              |
| Self-harm                            | Female | 10-14 years | 95+ years | Data Rich  | 0         | 2     | Population Density (300-500 ppl/sqkm, proportion)                | 0               |
| Self-harm                            | Female | 10-14 years | 95+ years | Data Rich  | 0         | 2     | Population Density (500-1000 ppl/sqkm, proportion)               | 31              |
| Self-harm                            | Female | 10-14 years | 95+ years | Data Rich  | 0         | 2     | Population Density (under 150 ppl/sqkm, proportion)              | 31              |
| Self-harm                            | Female | 10-14 years | 95+ years | Data Rich  | 0         | 2     | Population Density (over 1000 ppl/sqkm, proportion)              | 803             |
| Self-harm                            | Female | 10-14 years | 95+ years | Data Rich  | 0         | 2     | Population Density (150-300 ppl/sqkm, proportion)                | 804             |
| Self-harm                            | Female | 10-14 years | 95+ years | Data Rich  | 0         | 3     | Education (years per capita)                                     | 0               |
| Self-harm                            | Female | 10-14 years | 95+ years | Data Rich  | 0         | 3     | Socio-demographic Index                                          | 0               |
| Self-harm                            | Female | 10-14 years | 95+ years | Data Rich  | 0         | 3     | LDI (IS per capita)                                              | --              |
| Self-harm                            | Female | 10-14 years | 95+ years | Global     | 1         | 1     | Risk of selfharm due to major depressive disorder                | 0               |
| Self-harm                            | Female | 10-14 years | 95+ years | Global     | 1         | 1     | Log-transformed SEV scalar: Self Harm                            | 57              |
| Self-harm                            | Female | 10-14 years | 95+ years | Global     | 1         | 1     | Non-partner lifetime prevalence of sexual violence (female-only) | 371             |
| Self-harm                            | Female | 10-14 years | 95+ years | Global     | 1         | 1     | Alcohol (liters per capita)                                      | 404             |
| Self-harm                            | Female | 10-14 years | 95+ years | Global     | 1         | 1     | Major depressive disorder                                        | 998             |
| Self-harm                            | Female | 10-14 years | 95+ years | Global     | -1        | 2     | Healthcare access and quality index                              | 0               |
| Self-harm                            | Female | 10-14 years | 95+ years | Global     | -1        | 2     | Religion (binary, >50% Muslim)                                   | 417             |
| Self-harm                            | Female | 10-14 years | 95+ years | Global     | 0         | 2     | Population Density (500-1000 ppl/sqkm, proportion)               | 136             |
| Self-harm                            | Female | 10-14 years | 95+ years | Global     | 0         | 2     | Population Density (300-500 ppl/sqkm, proportion)                | 291             |
| Self-harm                            | Female | 10-14 years | 95+ years | Global     | 0         | 2     | Population Density (over 1000 ppl/sqkm, proportion)              | 354             |
| Self-harm                            | Female | 10-14 years | 95+ years | Global     | 0         | 2     | Population Density (under 150 ppl/sqkm, proportion)              | 369             |
| Self-harm                            | Female | 10-14 years | 95+ years | Global     | 0         | 2     | Population Density (150-300 ppl/sqkm, proportion)                | 417             |
| Self-harm                            | Female | 10-14 years | 95+ years | Global     | 0         | 3     | Socio-demographic Index                                          | 678             |
| Self-harm                            | Female | 10-14 years | 95+ years | Global     | 0         | 3     | Education (years per capita)                                     | 754             |
| Self-harm                            | Female | 10-14 years | 95+ years | Global     | 0         | 3     | LDI (IS per capita)                                              | --              |
| Self-harm                            | Male   | 10-14 years | 95+ years | Data Rich  | 1         | 1     | Alcohol (liters per capita)                                      | --              |
| Self-harm                            | Male   | 10-14 years | 95+ years | Data Rich  | -1        | 2     | Religion (binary, >50% Muslim)                                   | 15              |
| Self-harm                            | Male   | 10-14 years | 95+ years | Data Rich  | -1        | 2     | Healthcare access and quality index                              | --              |
| Self-harm                            | Male   | 10-14 years | 95+ years | Data Rich  | 0         | 2     | Population Density (500-1000 ppl/sqkm, proportion)               | 84              |
| Self-harm                            | Male   | 10-14 years | 95+ years | Data Rich  | 0         | 2     | Population Density (under 150 ppl/sqkm, proportion)              | 703             |
| Self-harm                            | Male   | 10-14 years | 95+ years | Data Rich  | 0         | 2     | Population Density (300-500 ppl/sqkm, proportion)                | 718             |
| Self-harm                            | Male   | 10-14 years | 95+ years | Data Rich  | 0         | 2     | Population Density (150-300 ppl/sqkm, proportion)                | --              |
| Self-harm                            | Male   | 10-14 years | 95+ years | Data Rich  | 0         | 2     | Population Density (over 1000 ppl/sqkm, proportion)              | --              |
| Self-harm                            | Male   | 10-14 years | 95+ years | Data Rich  | 0         | 3     | Education (years per capita)                                     | 760             |
| Self-harm                            | Male   | 10-14 years | 95+ years | Data Rich  | 0         | 3     | Socio-demographic Index                                          | 791             |
| Self-harm                            | Male   | 10-14 years | 95+ years | Data Rich  | 0         | 3     | LDI (IS per capita)                                              | --              |
| Self-harm                            | Male   | 10-14 years | 95+ years | Global     | 1         | 1     | Alcohol (liters per capita)                                      | --              |
| Self-harm                            | Male   | 10-14 years | 95+ years | Global     | -1        | 2     | Muslim Religion (proportion of population)                       | 668             |
| Self-harm                            | Male   | 10-14 years | 95+ years | Global     | -1        | 2     | Healthcare access and quality index                              | --              |
| Self-harm                            | Male   | 10-14 years | 95+ years | Global     | 0         | 2     | Population Density (under 150 ppl/sqkm, proportion)              | 436             |
| Self-harm                            | Male   | 10-14 years | 95+ years | Global     | 0         | 2     | Population Density (500-1000 ppl/sqkm, proportion)               | 512             |
| Self-harm                            | Male   | 10-14 years | 95+ years | Global     | 0         | 2     | Population Density (300-500 ppl/sqkm, proportion)                | 572             |
| Self-harm                            | Male   | 10-14 years | 95+ years | Global     | 0         | 2     | Population Density (150-300 ppl/sqkm, proportion)                | 760             |
| Self-harm                            | Male   | 10-14 years | 95+ years | Global     | 0         | 2     | Population Density (over 1000 ppl/sqkm, proportion)              | 760             |
| Self-harm                            | Male   | 10-14 years | 95+ years | Global     | 0         | 3     | Education (years per capita)                                     | 677             |
| Self-harm                            | Male   | 10-14 years | 95+ years | Global     | 0         | 3     | Socio-demographic Index                                          | 722             |
| Self-harm                            | Male   | 10-14 years | 95+ years | Global     | 0         | 3     | LDI (IS per capita)                                              | --              |
| Self-harm by firearm                 | Female | 10-14 years | 95+ years | Data Rich  | 1         | 1     | Major depressive disorder                                        | 1000            |
| Self-harm by firearm                 | Female | 10-14 years | 95+ years | Data Rich  | 1         | 1     | Alcohol (liters per capita)                                      | --              |
| Self-harm by firearm                 | Female | 10-14 years | 95+ years | Data Rich  | 1         | 1     | Log-transformed SEV scalar: Self Harm                            | --              |
| Self-harm by firearm                 | Female | 10-14 years | 95+ years | Data Rich  | -1        | 2     | Healthcare access and quality index                              | 14              |
| Self-harm by firearm                 | Female | 10-14 years | 95+ years | Data Rich  | -1        | 2     | Religion (binary, >50% Muslim)                                   | --              |
| Self-harm by firearm                 | Female | 10-14 years | 95+ years | Data Rich  | 0         | 2     | Population Density (over 1000 ppl/sqkm, proportion)              | 14              |
| Self-harm by firearm                 | Female | 10-14 years | 95+ years | Data Rich  | 0         | 2     | Population Density (under 150 ppl/sqkm, proportion)              | 319             |
| Self-harm by firearm                 | Female | 10-14 years | 95+ years | Data Rich  | 0         | 2     | Population Density (150-300 ppl/sqkm, proportion)                | 588             |
| Self-harm by firearm                 | Female | 10-14 years | 95+ years | Data Rich  | 0         | 2     | Population Density (300-500 ppl/sqkm, proportion)                | 641             |
| Self-harm by firearm                 | Female | 10-14 years | 95+ years | Data Rich  | 0         | 2     | Population Density (500-1000 ppl/sqkm, proportion)               | 698             |
| Self-harm by firearm                 | Female | 10-14 years | 95+ years | Data Rich  | 0         | 3     | Education (years per capita)                                     | 872             |
| Self-harm by firearm                 | Female | 10-14 years | 95+ years | Data Rich  | 0         | 3     | Socio-demographic Index                                          | 938             |
| Self-harm by firearm                 | Female | 10-14 years | 95+ years | Data Rich  | 0         | 3     | LDI (IS per capita)                                              | --              |
| Self-harm by firearm                 | Female | 10-14 years | 95+ years | Global     | 1         | 1     | Major depressive disorder                                        | 1000            |
| Self-harm by firearm                 | Female | 10-14 years | 95+ years | Global     | 1         | 1     | Alcohol (liters per capita)                                      | --              |



**Appendix Table 9: CODEm covariates used, level of covariate, and expected direction of covariate by cause, sex, and age**

*Covariates that CODEm did not select during the covariate selection process have no draw counts listed.*

| Cause                              | Sex    | Age Start   | Age End   | Model Type | Direction | Level | Covariate Name                                      | Number of Draws |
|------------------------------------|--------|-------------|-----------|------------|-----------|-------|-----------------------------------------------------|-----------------|
| Self-harm by firearm               | Female | 10-14 years | 95+ years | Global     | 1         | 1     | Log-transformed SEV scalar: Self Harm               | --              |
| Self-harm by firearm               | Female | 10-14 years | 95+ years | Global     | -1        | 2     | Healthcare access and quality index                 | 200             |
| Self-harm by firearm               | Female | 10-14 years | 95+ years | Global     | -1        | 2     | Religion (binary, >50% Muslim)                      | --              |
| Self-harm by firearm               | Female | 10-14 years | 95+ years | Global     | 0         | 2     | Population Density (150-300 ppl/sqkm, proportion)   | 149             |
| Self-harm by firearm               | Female | 10-14 years | 95+ years | Global     | 0         | 2     | Population Density (300-500 ppl/sqkm, proportion)   | 687             |
| Self-harm by firearm               | Female | 10-14 years | 95+ years | Global     | 0         | 2     | Population Density (500-1000 ppl/sqkm, proportion)  | 700             |
| Self-harm by firearm               | Female | 10-14 years | 95+ years | Global     | 0         | 2     | Population Density (over 1000 ppl/sqkm, proportion) | 711             |
| Self-harm by firearm               | Female | 10-14 years | 95+ years | Global     | 0         | 2     | Population Density (under 150 ppl/sqkm, proportion) | 749             |
| Self-harm by firearm               | Female | 10-14 years | 95+ years | Global     | 0         | 3     | Socio-demographic Index                             | 390             |
| Self-harm by firearm               | Female | 10-14 years | 95+ years | Global     | 0         | 3     | Education (years per capita)                        | 517             |
| Self-harm by firearm               | Female | 10-14 years | 95+ years | Global     | 0         | 3     | LDI (IS per capita)                                 | --              |
| Self-harm by firearm               | Male   | 10-14 years | 95+ years | Data Rich  | 1         | 1     | Major depressive disorder                           | 1000            |
| Self-harm by firearm               | Male   | 10-14 years | 95+ years | Data Rich  | 1         | 1     | Alcohol (liters per capita)                         | --              |
| Self-harm by firearm               | Male   | 10-14 years | 95+ years | Data Rich  | 1         | 1     | Log-transformed SEV scalar: Self Harm               | --              |
| Self-harm by firearm               | Male   | 10-14 years | 95+ years | Data Rich  | -1        | 2     | Healthcare access and quality index                 | --              |
| Self-harm by firearm               | Male   | 10-14 years | 95+ years | Data Rich  | -1        | 2     | Religion (binary, >50% Muslim)                      | --              |
| Self-harm by firearm               | Male   | 10-14 years | 95+ years | Data Rich  | 0         | 2     | Population Density (under 150 ppl/sqkm, proportion) | 47              |
| Self-harm by firearm               | Male   | 10-14 years | 95+ years | Data Rich  | 0         | 2     | Population Density (300-500 ppl/sqkm, proportion)   | 181             |
| Self-harm by firearm               | Male   | 10-14 years | 95+ years | Data Rich  | 0         | 2     | Population Density (150-300 ppl/sqkm, proportion)   | 211             |
| Self-harm by firearm               | Male   | 10-14 years | 95+ years | Data Rich  | 0         | 2     | Population Density (over 1000 ppl/sqkm, proportion) | 218             |
| Self-harm by firearm               | Male   | 10-14 years | 95+ years | Data Rich  | 0         | 2     | Population Density (500-1000 ppl/sqkm, proportion)  | 219             |
| Self-harm by firearm               | Male   | 10-14 years | 95+ years | Data Rich  | 0         | 3     | Socio-demographic Index                             | 210             |
| Self-harm by firearm               | Male   | 10-14 years | 95+ years | Data Rich  | 0         | 3     | Education (years per capita)                        | 991             |
| Self-harm by firearm               | Male   | 10-14 years | 95+ years | Data Rich  | 0         | 3     | LDI (IS per capita)                                 | --              |
| Self-harm by firearm               | Male   | 10-14 years | 95+ years | Global     | 1         | 1     | Alcohol (liters per capita)                         | --              |
| Self-harm by firearm               | Male   | 10-14 years | 95+ years | Global     | 1         | 1     | Log-transformed SEV scalar: Self Harm               | --              |
| Self-harm by firearm               | Male   | 10-14 years | 95+ years | Global     | 1         | 1     | Major depressive disorder                           | --              |
| Self-harm by firearm               | Male   | 10-14 years | 95+ years | Global     | -1        | 2     | Healthcare access and quality index                 | 96              |
| Self-harm by firearm               | Male   | 10-14 years | 95+ years | Global     | -1        | 2     | Religion (binary, >50% Muslim)                      | --              |
| Self-harm by firearm               | Male   | 10-14 years | 95+ years | Global     | 0         | 2     | Population Density (over 1000 ppl/sqkm, proportion) | 85              |
| Self-harm by firearm               | Male   | 10-14 years | 95+ years | Global     | 0         | 2     | Population Density (500-1000 ppl/sqkm, proportion)  | 98              |
| Self-harm by firearm               | Male   | 10-14 years | 95+ years | Global     | 0         | 2     | Population Density (150-300 ppl/sqkm, proportion)   | 546             |
| Self-harm by firearm               | Male   | 10-14 years | 95+ years | Global     | 0         | 2     | Population Density (300-500 ppl/sqkm, proportion)   | --              |
| Self-harm by firearm               | Male   | 10-14 years | 95+ years | Global     | 0         | 2     | Population Density (under 150 ppl/sqkm, proportion) | --              |
| Self-harm by firearm               | Male   | 10-14 years | 95+ years | Global     | 0         | 3     | Education (years per capita)                        | 177             |
| Self-harm by firearm               | Male   | 10-14 years | 95+ years | Global     | 0         | 3     | Socio-demographic Index                             | 295             |
| Self-harm by firearm               | Male   | 10-14 years | 95+ years | Global     | 0         | 3     | LDI (IS per capita)                                 | --              |
| Self-harm by other specified means | Female | 10-14 years | 95+ years | Data Rich  | 1         | 1     | Alcohol (liters per capita)                         | 0               |
| Self-harm by other specified means | Female | 10-14 years | 95+ years | Data Rich  | 1         | 1     | Log-transformed SEV scalar: Self Harm               | 0               |
| Self-harm by other specified means | Female | 10-14 years | 95+ years | Data Rich  | 1         | 1     | Major depressive disorder                           | 1000            |
| Self-harm by other specified means | Female | 10-14 years | 95+ years | Data Rich  | -1        | 2     | Healthcare access and quality index                 | 0               |
| Self-harm by other specified means | Female | 10-14 years | 95+ years | Data Rich  | -1        | 2     | Religion (binary, >50% Muslim)                      | --              |
| Self-harm by other specified means | Female | 10-14 years | 95+ years | Data Rich  | 0         | 2     | Population Density (over 1000 ppl/sqkm, proportion) | 32              |
| Self-harm by other specified means | Female | 10-14 years | 95+ years | Data Rich  | 0         | 2     | Population Density (150-300 ppl/sqkm, proportion)   | 198             |
| Self-harm by other specified means | Female | 10-14 years | 95+ years | Data Rich  | 0         | 2     | Population Density (300-500 ppl/sqkm, proportion)   | 839             |
| Self-harm by other specified means | Female | 10-14 years | 95+ years | Data Rich  | 0         | 2     | Population Density (500-1000 ppl/sqkm, proportion)  | 967             |
| Self-harm by other specified means | Female | 10-14 years | 95+ years | Data Rich  | 0         | 2     | Population Density (under 150 ppl/sqkm, proportion) | 993             |
| Self-harm by other specified means | Female | 10-14 years | 95+ years | Data Rich  | 0         | 3     | Education (years per capita)                        | 0               |
| Self-harm by other specified means | Female | 10-14 years | 95+ years | Data Rich  | 0         | 3     | Socio-demographic Index                             | 0               |
| Self-harm by other specified means | Female | 10-14 years | 95+ years | Data Rich  | 0         | 3     | LDI (IS per capita)                                 | --              |
| Self-harm by other specified means | Female | 10-14 years | 95+ years | Global     | 1         | 1     | Alcohol (liters per capita)                         | 200             |
| Self-harm by other specified means | Female | 10-14 years | 95+ years | Global     | 1         | 1     | Log-transformed SEV scalar: Self Harm               | 720             |
| Self-harm by other specified means | Female | 10-14 years | 95+ years | Global     | 1         | 1     | Major depressive disorder                           | 910             |
| Self-harm by other specified means | Female | 10-14 years | 95+ years | Global     | -1        | 2     | Healthcare access and quality index                 | 7               |
| Self-harm by other specified means | Female | 10-14 years | 95+ years | Global     | -1        | 2     | Religion (binary, >50% Muslim)                      | 673             |
| Self-harm by other specified means | Female | 10-14 years | 95+ years | Global     | 0         | 2     | Population Density (300-500 ppl/sqkm, proportion)   | 41              |
| Self-harm by other specified means | Female | 10-14 years | 95+ years | Global     | 0         | 2     | Population Density (150-300 ppl/sqkm, proportion)   | 438             |
| Self-harm by other specified means | Female | 10-14 years | 95+ years | Global     | 0         | 2     | Population Density (500-1000 ppl/sqkm, proportion)  | 444             |
| Self-harm by other specified means | Female | 10-14 years | 95+ years | Global     | 0         | 2     | Population Density (under 150 ppl/sqkm, proportion) | 462             |
| Self-harm by other specified means | Female | 10-14 years | 95+ years | Global     | 0         | 2     | Population Density (over 1000 ppl/sqkm, proportion) | 523             |
| Self-harm by other specified means | Female | 10-14 years | 95+ years | Global     | 0         | 3     | Education (years per capita)                        | 268             |
| Self-harm by other specified means | Female | 10-14 years | 95+ years | Global     | 0         | 3     | Socio-demographic Index                             | 537             |
| Self-harm by other specified means | Female | 10-14 years | 95+ years | Global     | 0         | 3     | LDI (IS per capita)                                 | --              |
| Self-harm by other specified means | Male   | 10-14 years | 95+ years | Data Rich  | 1         | 1     | Major depressive disorder                           | 736             |
| Self-harm by other specified means | Male   | 10-14 years | 95+ years | Data Rich  | 1         | 1     | Log-transformed SEV scalar: Self Harm               | 792             |
| Self-harm by other specified means | Male   | 10-14 years | 95+ years | Data Rich  | 1         | 1     | Alcohol (liters per capita)                         | --              |
| Self-harm by other specified means | Male   | 10-14 years | 95+ years | Data Rich  | -1        | 2     | Religion (binary, >50% Muslim)                      | 66              |
| Self-harm by other specified means | Male   | 10-14 years | 95+ years | Data Rich  | -1        | 2     | Healthcare access and quality index                 | --              |
| Self-harm by other specified means | Male   | 10-14 years | 95+ years | Data Rich  | 0         | 2     | Population Density (over 1000 ppl/sqkm, proportion) | 198             |
| Self-harm by other specified means | Male   | 10-14 years | 95+ years | Data Rich  | 0         | 2     | Population Density (300-500 ppl/sqkm, proportion)   | 330             |
| Self-harm by other specified means | Male   | 10-14 years | 95+ years | Data Rich  | 0         | 2     | Population Density (150-300 ppl/sqkm, proportion)   | 396             |
| Self-harm by other specified means | Male   | 10-14 years | 95+ years | Data Rich  | 0         | 2     | Population Density (500-1000 ppl/sqkm, proportion)  | 462             |
| Self-harm by other specified means | Male   | 10-14 years | 95+ years | Data Rich  | 0         | 2     | Population Density (under 150 ppl/sqkm, proportion) | --              |
| Self-harm by other specified means | Male   | 10-14 years | 95+ years | Data Rich  | 0         | 3     | Socio-demographic Index                             | 66              |
| Self-harm by other specified means | Male   | 10-14 years | 95+ years | Data Rich  | 0         | 3     | Education (years per capita)                        | 264             |
| Self-harm by other specified means | Male   | 10-14 years | 95+ years | Data Rich  | 0         | 3     | LDI (IS per capita)                                 | --              |
| Self-harm by other specified means | Male   | 10-14 years | 95+ years | Global     | 1         | 1     | Log-transformed SEV scalar: Self Harm               | 478             |
| Self-harm by other specified means | Male   | 10-14 years | 95+ years | Global     | 1         | 1     | Major depressive disorder                           | 839             |

**Appendix Table 9: CODEm covariates used, level of covariate, and expected direction of covariate by cause, sex, and age**

*Covariates that CODEm did not select during the covariate selection process have no draw counts listed.*

| Cause                              | Sex    | Age Start   | Age End   | Model Type | Direction | Level | Covariate Name                                      | Number of Draws |
|------------------------------------|--------|-------------|-----------|------------|-----------|-------|-----------------------------------------------------|-----------------|
| Self-harm by other specified means | Male   | 10-14 years | 95+ years | Global     | 1         | 1     | Alcohol (liters per capita)                         | --              |
| Self-harm by other specified means | Male   | 10-14 years | 95+ years | Global     | -1        | 2     | Religion (binary, >50% Muslim)                      | 75              |
| Self-harm by other specified means | Male   | 10-14 years | 95+ years | Global     | -1        | 2     | Healthcare access and quality index                 | --              |
| Self-harm by other specified means | Male   | 10-14 years | 95+ years | Global     | 0         | 2     | Population Density (300-500 ppl/sqkm, proportion)   | 101             |
| Self-harm by other specified means | Male   | 10-14 years | 95+ years | Global     | 0         | 2     | Population Density (150-300 ppl/sqkm, proportion)   | 176             |
| Self-harm by other specified means | Male   | 10-14 years | 95+ years | Global     | 0         | 2     | Population Density (over 1000 ppl/sqkm, proportion) | 318             |
| Self-harm by other specified means | Male   | 10-14 years | 95+ years | Global     | 0         | 2     | Population Density (under 150 ppl/sqkm, proportion) | 419             |
| Self-harm by other specified means | Male   | 10-14 years | 95+ years | Global     | 0         | 2     | Population Density (500-1000 ppl/sqkm, proportion)  | --              |
| Self-harm by other specified means | Male   | 10-14 years | 95+ years | Global     | 0         | 3     | Education (years per capita)                        | 427             |
| Self-harm by other specified means | Male   | 10-14 years | 95+ years | Global     | 0         | 3     | LDI (IS per capita)                                 | --              |
| Self-harm by other specified means | Male   | 10-14 years | 95+ years | Global     | 0         | 3     | Socio-demographic Index                             | --              |
| Interpersonal violence             | Female | 0-6 days    | 95+ years | Data Rich  | 1         | 1     | Log-transformed SEV scalar: Violence                | 881             |
| Interpersonal violence             | Female | 0-6 days    | 95+ years | Data Rich  | 1         | 1     | Alcohol (liters per capita)                         | --              |
| Interpersonal violence             | Female | 0-6 days    | 95+ years | Data Rich  | -1        | 2     | Healthcare access and quality index                 | 483             |
| Interpersonal violence             | Female | 0-6 days    | 95+ years | Data Rich  | 1         | 2     | Opium Cultivation (binary)                          | 10              |
| Interpersonal violence             | Female | 0-6 days    | 95+ years | Data Rich  | 1         | 2     | Population Density (over 1000 ppl/sqkm, proportion) | --              |
| Interpersonal violence             | Female | 0-6 days    | 95+ years | Data Rich  | 0         | 3     | Socio-demographic Index                             | 148             |
| Interpersonal violence             | Female | 0-6 days    | 95+ years | Data Rich  | 0         | 3     | Education (years per capita)                        | 156             |
| Interpersonal violence             | Female | 0-6 days    | 95+ years | Data Rich  | 0         | 3     | LDI (IS per capita)                                 | --              |
| Interpersonal violence             | Female | 0-6 days    | 95+ years | Global     | 1         | 1     | Log-transformed SEV scalar: Violence                | 721             |
| Interpersonal violence             | Female | 0-6 days    | 95+ years | Global     | 1         | 1     | Alcohol (liters per capita)                         | --              |
| Interpersonal violence             | Female | 0-6 days    | 95+ years | Global     | -1        | 2     | Healthcare access and quality index                 | 203             |
| Interpersonal violence             | Female | 0-6 days    | 95+ years | Global     | 1         | 2     | Population Density (over 1000 ppl/sqkm, proportion) | 331             |
| Interpersonal violence             | Female | 0-6 days    | 95+ years | Global     | 1         | 2     | Opium Cultivation (binary)                          | --              |
| Interpersonal violence             | Female | 0-6 days    | 95+ years | Global     | 0         | 3     | Education (years per capita)                        | 76              |
| Interpersonal violence             | Female | 0-6 days    | 95+ years | Global     | 0         | 3     | Socio-demographic Index                             | 312             |
| Interpersonal violence             | Female | 0-6 days    | 95+ years | Global     | 0         | 3     | LDI (IS per capita)                                 | --              |
| Interpersonal violence             | Male   | 0-6 days    | 95+ years | Data Rich  | 1         | 1     | Alcohol (liters per capita)                         | 161             |
| Interpersonal violence             | Male   | 0-6 days    | 95+ years | Data Rich  | 1         | 1     | Log-transformed SEV scalar: Violence                | 839             |
| Interpersonal violence             | Male   | 0-6 days    | 95+ years | Data Rich  | -1        | 2     | Healthcare access and quality index                 | 6               |
| Interpersonal violence             | Male   | 0-6 days    | 95+ years | Data Rich  | 1         | 2     | Population Density (over 1000 ppl/sqkm, proportion) | 0               |
| Interpersonal violence             | Male   | 0-6 days    | 95+ years | Data Rich  | 1         | 2     | Opium Cultivation (binary)                          | 801             |
| Interpersonal violence             | Male   | 0-6 days    | 95+ years | Data Rich  | 0         | 3     | Education (years per capita)                        | 38              |
| Interpersonal violence             | Male   | 0-6 days    | 95+ years | Data Rich  | 0         | 3     | Socio-demographic Index                             | 961             |
| Interpersonal violence             | Male   | 0-6 days    | 95+ years | Data Rich  | 0         | 3     | LDI (IS per capita)                                 | --              |
| Interpersonal violence             | Male   | 0-6 days    | 95+ years | Global     | 1         | 1     | Alcohol (liters per capita)                         | --              |
| Interpersonal violence             | Male   | 0-6 days    | 95+ years | Global     | 1         | 1     | Log-transformed SEV scalar: Violence                | --              |
| Interpersonal violence             | Male   | 0-6 days    | 95+ years | Global     | -1        | 2     | Healthcare access and quality index                 | 150             |
| Interpersonal violence             | Male   | 0-6 days    | 95+ years | Global     | 1         | 2     | Population Density (over 1000 ppl/sqkm, proportion) | 266             |
| Interpersonal violence             | Male   | 0-6 days    | 95+ years | Global     | 1         | 2     | Opium Cultivation (binary)                          | 486             |
| Interpersonal violence             | Male   | 0-6 days    | 95+ years | Global     | 0         | 3     | Education (years per capita)                        | 49              |
| Interpersonal violence             | Male   | 0-6 days    | 95+ years | Global     | 0         | 3     | Socio-demographic Index                             | 222             |
| Interpersonal violence             | Male   | 0-6 days    | 95+ years | Global     | 0         | 3     | LDI (IS per capita)                                 | --              |
| Assault by firearm                 | Female | 0-6 days    | 95+ years | Data Rich  | 1         | 1     | Log-transformed SEV scalar: Viol Gun                | 801             |
| Assault by firearm                 | Female | 0-6 days    | 95+ years | Data Rich  | 1         | 1     | Alcohol (liters per capita)                         | --              |
| Assault by firearm                 | Female | 0-6 days    | 95+ years | Data Rich  | -1        | 2     | Healthcare access and quality index                 | 38              |
| Assault by firearm                 | Female | 0-6 days    | 95+ years | Data Rich  | 1         | 2     | Opium Cultivation (binary)                          | 1               |
| Assault by firearm                 | Female | 0-6 days    | 95+ years | Data Rich  | 1         | 2     | Population Density (over 1000 ppl/sqkm, proportion) | --              |
| Assault by firearm                 | Female | 0-6 days    | 95+ years | Data Rich  | 0         | 3     | Socio-demographic Index                             | 160             |
| Assault by firearm                 | Female | 0-6 days    | 95+ years | Data Rich  | 0         | 3     | Education (years per capita)                        | --              |
| Assault by firearm                 | Female | 0-6 days    | 95+ years | Data Rich  | 0         | 3     | LDI (IS per capita)                                 | --              |
| Assault by firearm                 | Female | 0-6 days    | 95+ years | Global     | 1         | 1     | Log-transformed SEV scalar: Viol Gun                | 820             |
| Assault by firearm                 | Female | 0-6 days    | 95+ years | Global     | 1         | 1     | Alcohol (liters per capita)                         | --              |
| Assault by firearm                 | Female | 0-6 days    | 95+ years | Global     | -1        | 2     | Healthcare access and quality index                 | 416             |
| Assault by firearm                 | Female | 0-6 days    | 95+ years | Global     | 1         | 2     | Opium Cultivation (binary)                          | 416             |
| Assault by firearm                 | Female | 0-6 days    | 95+ years | Global     | 1         | 2     | Population Density (over 1000 ppl/sqkm, proportion) | --              |
| Assault by firearm                 | Female | 0-6 days    | 95+ years | Global     | 0         | 3     | Education (years per capita)                        | 391             |
| Assault by firearm                 | Female | 0-6 days    | 95+ years | Global     | 0         | 3     | Socio-demographic Index                             | 391             |
| Assault by firearm                 | Female | 0-6 days    | 95+ years | Global     | 0         | 3     | LDI (IS per capita)                                 | --              |
| Assault by firearm                 | Male   | 0-6 days    | 95+ years | Data Rich  | 1         | 1     | Log-transformed SEV scalar: Viol Gun                | 751             |
| Assault by firearm                 | Male   | 0-6 days    | 95+ years | Data Rich  | 1         | 1     | Alcohol (liters per capita)                         | 765             |
| Assault by firearm                 | Male   | 0-6 days    | 95+ years | Data Rich  | -1        | 2     | Healthcare access and quality index                 | --              |
| Assault by firearm                 | Male   | 0-6 days    | 95+ years | Data Rich  | 1         | 2     | Population Density (over 1000 ppl/sqkm, proportion) | 47              |
| Assault by firearm                 | Male   | 0-6 days    | 95+ years | Data Rich  | 1         | 2     | Opium Cultivation (binary)                          | --              |
| Assault by firearm                 | Male   | 0-6 days    | 95+ years | Data Rich  | 0         | 3     | Socio-demographic Index                             | 349             |
| Assault by firearm                 | Male   | 0-6 days    | 95+ years | Data Rich  | 0         | 3     | Education (years per capita)                        | --              |
| Assault by firearm                 | Male   | 0-6 days    | 95+ years | Data Rich  | 0         | 3     | LDI (IS per capita)                                 | --              |
| Assault by firearm                 | Male   | 0-6 days    | 95+ years | Global     | 1         | 1     | Alcohol (liters per capita)                         | 593             |
| Assault by firearm                 | Male   | 0-6 days    | 95+ years | Global     | 1         | 1     | Log-transformed SEV scalar: Viol Gun                | 594             |
| Assault by firearm                 | Male   | 0-6 days    | 95+ years | Global     | -1        | 2     | Healthcare access and quality index                 | 57              |
| Assault by firearm                 | Male   | 0-6 days    | 95+ years | Global     | 1         | 2     | Opium Cultivation (binary)                          | 228             |
| Assault by firearm                 | Male   | 0-6 days    | 95+ years | Global     | 1         | 2     | Population Density (over 1000 ppl/sqkm, proportion) | 324             |
| Assault by firearm                 | Male   | 0-6 days    | 95+ years | Global     | 0         | 3     | Education (years per capita)                        | 259             |
| Assault by firearm                 | Male   | 0-6 days    | 95+ years | Global     | 0         | 3     | Socio-demographic Index                             | 267             |
| Assault by firearm                 | Male   | 0-6 days    | 95+ years | Global     | 0         | 3     | LDI (IS per capita)                                 | --              |
| Assault by sharp object            | Female | 0-6 days    | 95+ years | Data Rich  | 1         | 1     | Alcohol (liters per capita)                         | 7               |
| Assault by sharp object            | Female | 0-6 days    | 95+ years | Data Rich  | 1         | 1     | Log-transformed SEV scalar: Viol Knife              | 993             |
| Assault by sharp object            | Female | 0-6 days    | 95+ years | Data Rich  | -1        | 2     | Healthcare access and quality index                 | 32              |

**Appendix Table 9: CODEm covariates used, level of covariate, and expected direction of covariate by cause, sex, and age**

*Covariates that CODEm did not select during the covariate selection process have no draw counts listed.*

| Cause                          | Sex    | Age Start   | Age End   | Model Type | Direction | Level | Covariate Name                                      | Number of Draws |
|--------------------------------|--------|-------------|-----------|------------|-----------|-------|-----------------------------------------------------|-----------------|
| Assault by sharp object        | Female | 0-6 days    | 95+ years | Data Rich  | 1         | 2     | Opium Cultivation (binary)                          | 0               |
| Assault by sharp object        | Female | 0-6 days    | 95+ years | Data Rich  | 1         | 2     | Population Density (over 1000 ppl/sqkm, proportion) | 32              |
| Assault by sharp object        | Female | 0-6 days    | 95+ years | Data Rich  | 0         | 3     | Socio-demographic Index                             | 803             |
| Assault by sharp object        | Female | 0-6 days    | 95+ years | Data Rich  | 0         | 3     | Education (years per capita)                        | 809             |
| Assault by sharp object        | Female | 0-6 days    | 95+ years | Data Rich  | 0         | 3     | LDI (IS per capita)                                 | --              |
| Assault by sharp object        | Female | 0-6 days    | 95+ years | Global     | 1         | 1     | Alcohol (liters per capita)                         | 1000            |
| Assault by sharp object        | Female | 0-6 days    | 95+ years | Global     | 1         | 1     | Log-transformed SEV scalar: Viol Knife              | --              |
| Assault by sharp object        | Female | 0-6 days    | 95+ years | Global     | -1        | 2     | Healthcare access and quality index                 | 269             |
| Assault by sharp object        | Female | 0-6 days    | 95+ years | Global     | 1         | 2     | Opium Cultivation (binary)                          | 126             |
| Assault by sharp object        | Female | 0-6 days    | 95+ years | Global     | 1         | 2     | Population Density (over 1000 ppl/sqkm, proportion) | 479             |
| Assault by sharp object        | Female | 0-6 days    | 95+ years | Global     | 0         | 3     | Socio-demographic Index                             | 156             |
| Assault by sharp object        | Female | 0-6 days    | 95+ years | Global     | 0         | 3     | Education (years per capita)                        | 239             |
| Assault by sharp object        | Female | 0-6 days    | 95+ years | Global     | 0         | 3     | LDI (IS per capita)                                 | --              |
| Assault by sharp object        | Male   | 0-6 days    | 95+ years | Data Rich  | 1         | 1     | Alcohol (liters per capita)                         | 288             |
| Assault by sharp object        | Male   | 0-6 days    | 95+ years | Data Rich  | 1         | 1     | Log-transformed SEV scalar: Viol Knife              | 712             |
| Assault by sharp object        | Male   | 0-6 days    | 95+ years | Data Rich  | -1        | 2     | Healthcare access and quality index                 | 172             |
| Assault by sharp object        | Male   | 0-6 days    | 95+ years | Data Rich  | 1         | 2     | Opium Cultivation (binary)                          | 0               |
| Assault by sharp object        | Male   | 0-6 days    | 95+ years | Data Rich  | 1         | 2     | Population Density (over 1000 ppl/sqkm, proportion) | 172             |
| Assault by sharp object        | Male   | 0-6 days    | 95+ years | Data Rich  | 0         | 3     | Education (years per capita)                        | 22              |
| Assault by sharp object        | Male   | 0-6 days    | 95+ years | Data Rich  | 0         | 3     | Socio-demographic Index                             | 529             |
| Assault by sharp object        | Male   | 0-6 days    | 95+ years | Data Rich  | 0         | 3     | LDI (IS per capita)                                 | --              |
| Assault by sharp object        | Male   | 0-6 days    | 95+ years | Global     | 1         | 1     | Alcohol (liters per capita)                         | 399             |
| Assault by sharp object        | Male   | 0-6 days    | 95+ years | Global     | 1         | 1     | Log-transformed SEV scalar: Viol Knife              | --              |
| Assault by sharp object        | Male   | 0-6 days    | 95+ years | Global     | -1        | 2     | Healthcare access and quality index                 | 666             |
| Assault by sharp object        | Male   | 0-6 days    | 95+ years | Global     | 1         | 2     | Opium Cultivation (binary)                          | 41              |
| Assault by sharp object        | Male   | 0-6 days    | 95+ years | Global     | 1         | 2     | Population Density (over 1000 ppl/sqkm, proportion) | 666             |
| Assault by sharp object        | Male   | 0-6 days    | 95+ years | Global     | 0         | 3     | Education (years per capita)                        | 291             |
| Assault by sharp object        | Male   | 0-6 days    | 95+ years | Global     | 0         | 3     | Socio-demographic Index                             | 411             |
| Assault by sharp object        | Male   | 0-6 days    | 95+ years | Global     | 0         | 3     | LDI (IS per capita)                                 | --              |
| Assault by other means         | Female | 0-6 days    | 95+ years | Data Rich  | 1         | 1     | Alcohol (liters per capita)                         | 905             |
| Assault by other means         | Female | 0-6 days    | 95+ years | Data Rich  | 1         | 1     | Log-transformed SEV scalar: Oth Viol                | --              |
| Assault by other means         | Female | 0-6 days    | 95+ years | Data Rich  | -1        | 2     | Healthcare access and quality index                 | 298             |
| Assault by other means         | Female | 0-6 days    | 95+ years | Data Rich  | 1         | 2     | Population Density (over 1000 ppl/sqkm, proportion) | 63              |
| Assault by other means         | Female | 0-6 days    | 95+ years | Data Rich  | 1         | 2     | Opium Cultivation (binary)                          | --              |
| Assault by other means         | Female | 0-6 days    | 95+ years | Data Rich  | 0         | 3     | Socio-demographic Index                             | 150             |
| Assault by other means         | Female | 0-6 days    | 95+ years | Data Rich  | 0         | 3     | Education (years per capita)                        | 396             |
| Assault by other means         | Female | 0-6 days    | 95+ years | Data Rich  | 0         | 3     | LDI (IS per capita)                                 | --              |
| Assault by other means         | Female | 0-6 days    | 95+ years | Global     | 1         | 1     | Log-transformed SEV scalar: Oth Viol                | 386             |
| Assault by other means         | Female | 0-6 days    | 95+ years | Global     | 1         | 1     | Alcohol (liters per capita)                         | 614             |
| Assault by other means         | Female | 0-6 days    | 95+ years | Global     | -1        | 2     | Healthcare access and quality index                 | 311             |
| Assault by other means         | Female | 0-6 days    | 95+ years | Global     | 1         | 2     | Population Density (over 1000 ppl/sqkm, proportion) | 468             |
| Assault by other means         | Female | 0-6 days    | 95+ years | Global     | 1         | 2     | Opium Cultivation (binary)                          | --              |
| Assault by other means         | Female | 0-6 days    | 95+ years | Global     | 0         | 3     | Socio-demographic Index                             | 476             |
| Assault by other means         | Female | 0-6 days    | 95+ years | Global     | 0         | 3     | Education (years per capita)                        | 528             |
| Assault by other means         | Female | 0-6 days    | 95+ years | Global     | 0         | 3     | LDI (IS per capita)                                 | --              |
| Assault by other means         | Male   | 0-6 days    | 95+ years | Data Rich  | 1         | 1     | Alcohol (liters per capita)                         | 144             |
| Assault by other means         | Male   | 0-6 days    | 95+ years | Data Rich  | 1         | 1     | Log-transformed SEV scalar: Oth Viol                | --              |
| Assault by other means         | Male   | 0-6 days    | 95+ years | Data Rich  | -1        | 2     | Healthcare access and quality index                 | --              |
| Assault by other means         | Male   | 0-6 days    | 95+ years | Data Rich  | 1         | 2     | Population Density (over 1000 ppl/sqkm, proportion) | 207             |
| Assault by other means         | Male   | 0-6 days    | 95+ years | Data Rich  | 1         | 2     | Opium Cultivation (binary)                          | 381             |
| Assault by other means         | Male   | 0-6 days    | 95+ years | Data Rich  | 0         | 3     | Socio-demographic Index                             | 457             |
| Assault by other means         | Male   | 0-6 days    | 95+ years | Data Rich  | 0         | 3     | Education (years per capita)                        | 504             |
| Assault by other means         | Male   | 0-6 days    | 95+ years | Data Rich  | 0         | 3     | LDI (IS per capita)                                 | --              |
| Assault by other means         | Male   | 0-6 days    | 95+ years | Global     | 1         | 1     | Alcohol (liters per capita)                         | --              |
| Assault by other means         | Male   | 0-6 days    | 95+ years | Global     | 1         | 1     | Log-transformed SEV scalar: Oth Viol                | --              |
| Assault by other means         | Male   | 0-6 days    | 95+ years | Global     | -1        | 2     | Healthcare access and quality index                 | 770             |
| Assault by other means         | Male   | 0-6 days    | 95+ years | Global     | 1         | 2     | Population Density (over 1000 ppl/sqkm, proportion) | 345             |
| Assault by other means         | Male   | 0-6 days    | 95+ years | Global     | 1         | 2     | Opium Cultivation (binary)                          | 606             |
| Assault by other means         | Male   | 0-6 days    | 95+ years | Global     | 0         | 3     | Socio-demographic Index                             | 111             |
| Assault by other means         | Male   | 0-6 days    | 95+ years | Global     | 0         | 3     | Education (years per capita)                        | 488             |
| Assault by other means         | Male   | 0-6 days    | 95+ years | Global     | 0         | 3     | LDI (IS per capita)                                 | --              |
| Executions and police conflict | Female | 28-364 days | 95+ years | Data Rich  | -1        | 2     | Healthcare access and quality index                 | 312             |
| Executions and police conflict | Female | 28-364 days | 95+ years | Data Rich  | 0         | 2     | Socio-demographic Index                             | 1000            |
| Executions and police conflict | Female | 28-364 days | 95+ years | Data Rich  | 1         | 2     | Alcohol (liters per capita)                         | --              |
| Executions and police conflict | Female | 28-364 days | 95+ years | Data Rich  | 1         | 2     | Population Density (over 1000 ppl/sqkm, proportion) | --              |
| Executions and police conflict | Female | 28-364 days | 95+ years | Data Rich  | 0         | 3     | LDI (IS per capita)                                 | 587             |
| Executions and police conflict | Female | 28-364 days | 95+ years | Data Rich  | 1         | 3     | Education (years per capita)                        | 80              |
| Executions and police conflict | Female | 28-364 days | 95+ years | Global     | -1        | 2     | Healthcare access and quality index                 | 502             |
| Executions and police conflict | Female | 28-364 days | 95+ years | Global     | 0         | 2     | Socio-demographic Index                             | 772             |
| Executions and police conflict | Female | 28-364 days | 95+ years | Global     | 1         | 2     | Alcohol (liters per capita)                         | --              |
| Executions and police conflict | Female | 28-364 days | 95+ years | Global     | 1         | 2     | Population Density (over 1000 ppl/sqkm, proportion) | --              |
| Executions and police conflict | Female | 28-364 days | 95+ years | Global     | 0         | 3     | LDI (IS per capita)                                 | 135             |
| Executions and police conflict | Female | 28-364 days | 95+ years | Global     | 1         | 3     | Education (years per capita)                        | 586             |
| Executions and police conflict | Male   | 28-364 days | 95+ years | Data Rich  | -1        | 2     | Healthcare access and quality index                 | 994             |
| Executions and police conflict | Male   | 28-364 days | 95+ years | Data Rich  | 0         | 2     | Socio-demographic Index                             | 994             |
| Executions and police conflict | Male   | 28-364 days | 95+ years | Data Rich  | 1         | 2     | Population Density (over 1000 ppl/sqkm, proportion) | 839             |
| Executions and police conflict | Male   | 28-364 days | 95+ years | Data Rich  | 1         | 2     | Alcohol (liters per capita)                         | --              |
| Executions and police conflict | Male   | 28-364 days | 95+ years | Data Rich  | 0         | 3     | LDI (IS per capita)                                 | 1               |

**Appendix Table 9: CODEm covariates used, level of covariate, and expected direction of covariate by cause, sex, and age**

*Covariates that CODEm did not select during the covariate selection process have no draw counts listed.*

| Cause                          | Sex  | Age Start   | Age End   | Model Type | Direction | Level | Covariate Name                                      | Number of Draws |
|--------------------------------|------|-------------|-----------|------------|-----------|-------|-----------------------------------------------------|-----------------|
| Executions and police conflict | Male | 28-364 days | 95+ years | Data Rich  | 1         | 3     | Education (years per capita)                        | 33              |
| Executions and police conflict | Male | 28-364 days | 95+ years | Global     | -1        | 2     | Healthcare access and quality index                 | 420             |
| Executions and police conflict | Male | 28-364 days | 95+ years | Global     | 0         | 2     | Socio-demographic Index                             | 833             |
| Executions and police conflict | Male | 28-364 days | 95+ years | Global     | 1         | 2     | Population Density (over 1000 ppl/sqkm, proportion) | 489             |
| Executions and police conflict | Male | 28-364 days | 95+ years | Global     | 1         | 2     | Alcohol (liters per capita)                         | --              |
| Executions and police conflict | Male | 28-364 days | 95+ years | Global     | 0         | 3     | LDI (IS per capita)                                 | 498             |
| Executions and police conflict | Male | 28-364 days | 95+ years | Global     | 1         | 3     | Education (years per capita)                        | 381             |



Appendix Table 10: Comparison of GBD 2016 and GBD 2017 covariates and level of covariates used in cause of death modeling

| Cause        | Sex    | Covariate                                                                                                 | Level 1 2017 | Level 2 2017 | Level 3 2017 | Level 1 2016 | Level 2 2016 | Level 3 2016 |
|--------------|--------|-----------------------------------------------------------------------------------------------------------|--------------|--------------|--------------|--------------|--------------|--------------|
| Otitis media | Female | Healthcare access and quality index                                                                       |              | X            |              |              | X            |              |
| Otitis media | Male   | Socio-demographic index                                                                                   |              |              | X            |              |              | X            |
| Otitis media | Female | Indoor Air Pollution (All Cooking Fuels)                                                                  |              | X            |              |              | X            |              |
| Otitis media | Female | Indoor Air Pollution (All Cooking Fuels)                                                                  |              | X            |              |              | X            |              |
| Otitis media | Female | Indoor Air Pollution (All Cooking Fuels)                                                                  |              | X            |              |              | X            |              |
| Otitis media | Male   | Outdoor Air Pollution (PM2.5)                                                                             |              | X            |              |              | X            |              |
| Otitis media | Female | Outdoor Air Pollution (PM2.5)                                                                             |              | X            |              |              | X            |              |
| Otitis media | Male   | Smoking Prevalence                                                                                        | X            |              |              | X            |              |              |
| Otitis media | Female | Smoking Prevalence                                                                                        | X            |              |              | X            |              |              |
| Otitis media | Male   | Log-transformed SEV scalar: Otitis                                                                        | X            |              |              | X            |              |              |
| Otitis media | Female | Log-transformed SEV scalar: Otitis                                                                        | X            |              |              | X            |              |              |
| Otitis media | Male   | Indoor Air Pollution (All Cooking Fuels)                                                                  |              | X            |              |              | X            |              |
| Meningitis   | Female | Maternal Education (years per capita)                                                                     |              |              | X            |              |              | X            |
| Meningitis   | Male   | Maternal Education (years per capita)                                                                     |              |              | X            |              |              | X            |
| Meningitis   | Female | DTP3 Coverage (proportion)                                                                                |              |              | X            |              |              | X            |
| Meningitis   | Female | meningitis belt (proportion)                                                                              | X            |              |              | X            |              |              |
| Meningitis   | Male   | DTP3 Coverage (proportion)                                                                                |              |              | X            |              |              | X            |
| Meningitis   | Male   | DTP3 Coverage (proportion)                                                                                |              |              | X            |              |              | X            |
| Meningitis   | Male   | Underweight (proportion <2SD weight for age, <5 years)                                                    |              | X            |              |              | X            |              |
| Meningitis   | Male   | meningitis belt (proportion)                                                                              | X            |              |              | X            |              |              |
| Meningitis   | Female | DTP3 Coverage (proportion)                                                                                |              |              | X            |              |              | X            |
| Meningitis   | Female | Underweight (proportion <2SD weight for age, <5 years)                                                    |              |              |              |              | X            |              |
| Meningitis   | Male   | Health System Access (capped)                                                                             |              | X            |              |              | X            |              |
| Meningitis   | Female | Improved Water Source (proportion with access)                                                            |              | X            |              |              | X            |              |
| Meningitis   | Male   | Sanitation (proportion with access)                                                                       |              |              | X            |              |              | X            |
| Meningitis   | Female | Sanitation (proportion with access)                                                                       |              |              | X            |              |              | X            |
| Meningitis   | Female | Health System Access (capped)                                                                             |              | X            |              |              | X            |              |
| Meningitis   | Male   | Socio-demographic index                                                                                   |              |              | X            |              |              | X            |
| Meningitis   | Female | Socio-demographic index                                                                                   |              |              | X            |              |              | X            |
| Meningitis   | Male   | Healthcare access and quality index                                                                       |              | X            |              |              | X            |              |
| Meningitis   | Female | Healthcare access and quality index                                                                       |              | X            |              |              | X            |              |
| Meningitis   | Male   | LDI (IS per capita)                                                                                       |              |              | X            |              |              | X            |
| Meningitis   | Female | LDI (IS per capita)                                                                                       |              |              | X            |              |              | X            |
| Meningitis   | Male   | Improved Water Source (proportion with access)                                                            |              | X            |              |              | X            |              |
| Meningitis   | Male   | Proportion of total population covered by meningitis initiative (meningitis meningococcal type A vaccine) |              |              | X            |              | X            |              |
| Meningitis   | Female | Proportion of total population covered by meningitis initiative (meningitis meningococcal type A vaccine) |              |              | X            |              | X            |              |
| Encephalitis | Female | Sanitation (proportion with access)                                                                       |              |              | X            |              |              | X            |
| Encephalitis | Male   | LDI (IS per capita)                                                                                       |              | X            |              |              | X            |              |
| Encephalitis | Female | LDI (IS per capita)                                                                                       |              | X            |              |              | X            |              |
| Encephalitis | Male   | Healthcare access and quality index                                                                       |              | X            |              |              | X            |              |
| Encephalitis | Female | Healthcare access and quality index                                                                       |              | X            |              |              | X            |              |
| Encephalitis | Male   | Socio-demographic index                                                                                   |              |              | X            |              |              | X            |
| Encephalitis | Male   | In-Facility Delivery (proportion)                                                                         |              |              | X            |              |              | X            |
| Encephalitis | Female | In-Facility Delivery (proportion)                                                                         |              |              | X            |              |              | X            |
| Encephalitis | Male   | Health System Access (capped)                                                                             |              | X            |              |              | X            |              |
| Encephalitis | Female | Health System Access (capped)                                                                             |              | X            |              |              | X            |              |
| Encephalitis | Female | Socio-demographic index                                                                                   |              |              | X            |              |              | X            |
| Encephalitis | Male   | Improved Water Source (proportion with access)                                                            |              |              | X            |              |              | X            |
| Encephalitis | Male   | Sanitation (proportion with access)                                                                       |              |              | X            |              |              | X            |
| Encephalitis | Male   | Japanese encephalitis endemic area (binary)                                                               | X            |              |              |              |              | X            |
| Encephalitis | Female | Maternal Education (years per capita)                                                                     |              |              | X            |              |              | X            |
| Encephalitis | Male   | Maternal Education (years per capita)                                                                     |              |              | X            |              |              | X            |
| Encephalitis | Female | Japanese encephalitis endemic area (binary)                                                               | X            |              |              | X            |              | X            |
| Encephalitis | Male   | Underweight (proportion <2SD weight for age, <5 years)                                                    | X            |              |              |              |              | X            |
| Encephalitis | Female | Improved Water Source (proportion with access)                                                            |              |              | X            |              |              | X            |
| Encephalitis | Female | Underweight (proportion <2SD weight for age, <5 years)                                                    | X            |              |              | X            |              |              |
| Tetanus      | Male   | Sanitation (proportion with access)                                                                       |              |              | X            |              |              | X            |
| Tetanus      | Female | Tetanus Toxoid Coverage Smooth (proportion)                                                               | X            |              |              | X            |              |              |
| Tetanus      | Male   | Tetanus Toxoid Coverage Smooth (proportion)                                                               | X            |              |              | X            |              |              |
| Tetanus      | Female | DTP3 Coverage (proportion)                                                                                | X            |              |              | X            |              |              |
| Tetanus      | Female | DTP3 Coverage (proportion)                                                                                | X            |              |              | X            |              |              |
| Tetanus      | Male   | DTP3 Coverage (proportion)                                                                                | X            |              |              | X            |              |              |
| Tetanus      | Male   | DTP3 Coverage (proportion)                                                                                | X            |              |              | X            |              |              |
| Tetanus      | Female | Sanitation (proportion with access)                                                                       |              |              | X            |              |              | X            |
| Tetanus      | Male   | Health System Access (capped)                                                                             |              | X            |              |              | X            |              |
| Tetanus      | Female | Health System Access (capped)                                                                             |              | X            |              |              | X            |              |
| Tetanus      | Male   | Skilled Birth Attendance (proportion)                                                                     |              |              | X            |              |              | X            |
| Tetanus      | Female | Skilled Birth Attendance (proportion)                                                                     |              |              | X            |              |              | X            |
| Tetanus      | Male   | Education (years per capita)                                                                              |              |              | X            |              |              | X            |
| Tetanus      | Male   | LDI (IS per capita)                                                                                       |              |              | X            |              |              | X            |
| Tetanus      | Female | LDI (IS per capita)                                                                                       |              |              | X            |              |              | X            |
| Tetanus      | Male   | Healthcare access and quality index                                                                       |              | X            |              |              | X            |              |
| Tetanus      | Female | Education (years per capita)                                                                              |              |              | X            |              |              | X            |
| Tetanus      | Male   | Socio-demographic index                                                                                   |              |              | X            |              |              | X            |
| Tetanus      | Female | Socio-demographic index                                                                                   |              |              | X            |              |              | X            |
| Tetanus      | Male   | In-Facility Delivery (proportion)                                                                         |              | X            |              |              | X            |              |
| Tetanus      | Female | In-Facility Delivery (proportion)                                                                         |              | X            |              |              | X            |              |
| Tetanus      | Female | Healthcare access and quality index                                                                       |              | X            |              |              | X            |              |
| Dengue       | Female | Population Density (over 1000 ppl/sqkm, proportion)                                                       | X            |              |              | X            |              |              |
| Dengue       | Male   | Population weighted probability of dengue transmission                                                    | X            |              |              | X            |              |              |
| Dengue       | Male   | Education (years per capita)                                                                              |              |              | X            |              |              | X            |
| Dengue       | Female | Education (years per capita)                                                                              |              |              | X            |              |              | X            |
| Dengue       | Male   | LDI (IS per capita)                                                                                       |              |              | X            |              |              | X            |
| Dengue       | Female | Population weighted probability of dengue transmission                                                    | X            |              |              | X            |              |              |
| Dengue       | Female | LDI (IS per capita)                                                                                       |              |              | X            |              |              | X            |
| Dengue       | Male   | Population Density (over 1000 ppl/sqkm, proportion)                                                       | X            |              |              | X            |              |              |
| Dengue       | Male   | Elevation Under 100m (proportion)                                                                         |              | X            |              |              | X            |              |
| Dengue       | Female | Rainfall Quintile 5 (proportion)                                                                          |              | X            |              |              | X            |              |
| Dengue       | Male   | Latitude Under 15 (proportion)                                                                            |              | X            |              |              | X            |              |
| Dengue       | Female | Latitude Under 15 (proportion)                                                                            |              | X            |              |              | X            |              |
| Dengue       | Male   | Rainfall Quintile 5 (proportion)                                                                          |              | X            |              |              | X            |              |
| Dengue       | Male   | Rainfall Quintile 4 (proportion)                                                                          |              | X            |              |              | X            |              |
| Dengue       | Female | Rainfall Quintile 4 (proportion)                                                                          |              | X            |              |              | X            |              |
| Dengue       | Male   | Health System Access (united)                                                                             |              | X            |              |              | X            |              |
| Dengue       | Female | Health System Access (united)                                                                             |              | X            |              |              | X            |              |
| Dengue       | Female | Dengue outbreaks (binary)                                                                                 |              | X            |              |              | X            |              |
| Dengue       | Female | Elevation Under 100m (proportion)                                                                         |              | X            |              |              | X            |              |
| Dengue       | Male   | Dengue outbreaks (binary)                                                                                 |              | X            |              |              | X            |              |
| Rabies       | Male   | Population Density (500-1000 ppl/sqkm, proportion)                                                        |              |              | X            |              |              | X            |
| Rabies       | Female | Population Density (500-1000 ppl/sqkm, proportion)                                                        |              |              | X            |              |              | X            |
| Rabies       | Male   | Healthcare access and quality index                                                                       |              | X            |              |              | X            |              |
| Rabies       | Male   | Population Density (under 150 ppl/sqkm, proportion)                                                       |              |              | X            |              |              | X            |
| Rabies       | Female | Health System Access (united)                                                                             | X            |              |              | X            |              |              |
| Rabies       | Male   | Health System Access (united)                                                                             |              | X            |              |              | X            |              |
| Rabies       | Male   | Health System Access (united)                                                                             |              | X            |              |              | X            |              |
| Rabies       | Male   | Health System Access (united)                                                                             | X            |              |              | X            |              |              |
| Rabies       | Female | Health System Access (capped)                                                                             |              | X            |              |              | X            |              |
| Rabies       | Male   | Socio-demographic index                                                                                   |              |              | X            |              |              | X            |
| Rabies       | Female | Socio-demographic index                                                                                   |              |              | X            |              |              | X            |
| Rabies       | Female | Population Density (under 150 ppl/sqkm, proportion)                                                       |              |              | X            |              |              | X            |
| Rabies       | Male   | Antenatal Care (4 visits) Coverage (proportion)                                                           | X            |              |              | X            |              |              |
| Rabies       | Female | Health System Access (united)                                                                             |              | X            |              |              | X            |              |
| Rabies       | Male   | In-Facility Delivery (proportion)                                                                         | X            |              |              | X            |              |              |
| Rabies       | Female | In-Facility Delivery (proportion)                                                                         | X            |              |              | X            |              |              |
| Rabies       | Male   | Skilled Birth Attendance (proportion)                                                                     |              | X            |              |              | X            |              |
| Rabies       | Female | Skilled Birth Attendance (proportion)                                                                     |              | X            |              |              | X            |              |

Appendix Table 10: Comparison of GBD 2016 and GBD 2017 covariates and level of covariates used in cause of death modeling

| Cause                                                    | Sex    | Covariate                                          | Level 1 2017 | Level 2 2017 | Level 3 2017 | Level 1 2016 | Level 2 2016 | Level 3 2016 |
|----------------------------------------------------------|--------|----------------------------------------------------|--------------|--------------|--------------|--------------|--------------|--------------|
| Rabies                                                   | Male   | Health System Access (capped)                      |              | X            |              |              | X            |              |
| Rabies                                                   | Female | Health System Access (uncapped)                    |              | X            |              | X            |              |              |
| Rabies                                                   | Female | Health System Access (uncapped)                    | X            |              |              |              | X            |              |
| Rabies                                                   | Female | Antenatal Care (4 visits) Coverage (proportion)    | X            |              |              | X            |              |              |
| Rabies                                                   | Female | Healthcare access and quality index                |              | X            |              |              | X            |              |
| Other neglected tropical diseases                        | Male   | Education (years per capita)                       |              |              | X            |              |              | X            |
| Other neglected tropical diseases                        | Female | Education (years per capita)                       |              |              | X            |              |              | X            |
| Other neglected tropical diseases                        | Female | Rainfall Quintile 5 (proportion)                   |              | X            |              |              | X            |              |
| Other neglected tropical diseases                        | Male   | LDI (5\$ per capita)                               |              |              | X            |              |              | X            |
| Other neglected tropical diseases                        | Male   | Healthcare access and quality index                | X            |              |              | X            |              |              |
| Other neglected tropical diseases                        | Female | Healthcare access and quality index                | X            |              |              | X            |              |              |
| Other neglected tropical diseases                        | Male   | Socio-demographic Index                            |              |              | X            |              |              | X            |
| Other neglected tropical diseases                        | Female | Socio-demographic Index                            |              |              | X            |              |              | X            |
| Other neglected tropical diseases                        | Female | LDI (5\$ per capita)                               |              |              | X            |              |              | X            |
| Other neglected tropical diseases                        | Female | Sanitation (proportion with access)                |              | X            |              |              | X            |              |
| Other neglected tropical diseases                        | Male   | Latitude Under 15 (proportion)                     | X            |              |              | X            |              |              |
| Other neglected tropical diseases                        | Female | Latitude Under 15 (proportion)                     | X            |              |              | X            |              |              |
| Other neglected tropical diseases                        | Male   | Rainfall Quintile 5 (proportion)                   |              | X            |              |              | X            |              |
| Other neglected tropical diseases                        | Male   | Sanitation (proportion with access)                |              | X            |              |              | X            |              |
| Neonatal disorders                                       | Female | Smoking Prevalence (Reproductive Age Standardized) | X            |              |              | X            |              |              |
| Neonatal disorders                                       | Female | Total Fertility Rate                               |              |              | X            |              |              | X            |
| Neonatal disorders                                       | Male   | Total Fertility Rate                               |              |              | X            |              |              | X            |
| Neonatal disorders                                       | Female | Health System Access (capped)                      |              | X            |              |              | X            |              |
| Neonatal disorders                                       | Male   | Health System Access (capped)                      |              | X            |              |              | X            |              |
| Neonatal disorders                                       | Female | Indoor Air Pollution (All Cooking Fuels)           | X            |              |              | X            |              |              |
| Neonatal disorders                                       | Male   | Indoor Air Pollution (All Cooking Fuels)           | X            |              |              | X            |              |              |
| Neonatal disorders                                       | Female | Skilled Birth Attendance (proportion)              |              | X            |              |              | X            |              |
| Neonatal disorders                                       | Male   | Skilled Birth Attendance (proportion)              |              | X            |              |              | X            |              |
| Neonatal disorders                                       | Male   | Smoking Prevalence (Reproductive Age Standardized) | X            |              |              | X            |              |              |
| Neonatal disorders                                       | Male   | Antenatal Care (4 visits) Coverage (proportion)    |              | X            |              |              | X            |              |
| Neonatal disorders                                       | Male   | Live Births 35+ (proportion)                       |              | X            |              |              | X            |              |
| Neonatal disorders                                       | Female | Live Births 35+ (proportion)                       |              | X            |              |              | X            |              |
| Neonatal disorders                                       | Female | Education (years per capita)                       |              |              | X            |              |              | X            |
| Neonatal disorders                                       | Male   | LDI (5\$ per capita)                               |              |              | X            |              |              | X            |
| Neonatal disorders                                       | Female | LDI (5\$ per capita)                               |              |              | X            |              |              | X            |
| Neonatal disorders                                       | Male   | Healthcare access and quality index                |              | X            |              |              | X            |              |
| Neonatal disorders                                       | Male   | Education (years per capita)                       |              |              | X            |              |              | X            |
| Neonatal disorders                                       | Male   | Socio-demographic Index                            |              |              | X            |              |              | X            |
| Neonatal disorders                                       | Female | Socio-demographic Index                            |              |              | X            |              |              | X            |
| Neonatal disorders                                       | Female | Antenatal Care (4 visits) Coverage (proportion)    |              | X            |              |              | X            |              |
| Neonatal disorders                                       | Male   | In-Facility Delivery (proportion)                  |              | X            |              |              | X            |              |
| Neonatal disorders                                       | Female | In-Facility Delivery (proportion)                  |              | X            |              |              | X            |              |
| Neonatal disorders                                       | Female | Healthcare access and quality index                |              | X            |              |              | X            |              |
| Neonatal preterm birth                                   | Male   | In-Facility Delivery (proportion)                  |              | X            |              |              | X            |              |
| Neonatal preterm birth                                   | Female | Antenatal Care (4 visits) Coverage (proportion)    |              | X            |              |              | X            |              |
| Neonatal preterm birth                                   | Male   | Antenatal Care (4 visits) Coverage (proportion)    |              | X            |              |              | X            |              |
| Neonatal preterm birth                                   | Female | Socio-demographic Index                            |              |              | X            |              |              | X            |
| Neonatal preterm birth                                   | Female | Healthcare access and quality index                |              | X            |              |              | X            |              |
| Neonatal preterm birth                                   | Male   | Healthcare access and quality index                |              | X            |              |              | X            |              |
| Neonatal preterm birth                                   | Female | LDI (5\$ per capita)                               |              |              | X            |              |              | X            |
| Neonatal preterm birth                                   | Male   | LDI (5\$ per capita)                               |              |              | X            |              |              | X            |
| Neonatal preterm birth                                   | Female | In-Facility Delivery (proportion)                  |              | X            |              |              | X            |              |
| Neonatal preterm birth                                   | Male   | Socio-demographic Index                            |              |              | X            |              |              | X            |
| Neonatal preterm birth                                   | Male   | Live Births 35+ (proportion)                       |              | X            |              |              | X            |              |
| Neonatal preterm birth                                   | Male   | Indoor Air Pollution (All Cooking Fuels)           | X            |              |              | X            |              |              |
| Neonatal preterm birth                                   | Male   | Smoking Prevalence (Reproductive Age Standardized) | X            |              |              | X            |              |              |
| Neonatal preterm birth                                   | Female | Smoking Prevalence (Reproductive Age Standardized) | X            |              |              | X            |              |              |
| Neonatal preterm birth                                   | Male   | Skilled Birth Attendance (proportion)              |              | X            |              |              | X            |              |
| Neonatal preterm birth                                   | Female | Skilled Birth Attendance (proportion)              |              | X            |              |              | X            |              |
| Neonatal preterm birth                                   | Female | Indoor Air Pollution (All Cooking Fuels)           | X            |              |              | X            |              |              |
| Neonatal preterm birth                                   | Male   | Health System Access (capped)                      | X            |              |              | X            |              |              |
| Neonatal preterm birth                                   | Female | Health System Access (capped)                      | X            |              |              | X            |              |              |
| Neonatal preterm birth                                   | Male   | Total Fertility Rate                               |              |              | X            |              |              | X            |
| Neonatal preterm birth                                   | Female | Total Fertility Rate                               |              |              | X            |              |              | X            |
| Neonatal preterm birth                                   | Female | Education (years per capita)                       |              |              | X            |              |              | X            |
| Neonatal preterm birth                                   | Female | Live Births 35+ (proportion)                       |              | X            |              |              | X            |              |
| Neonatal preterm birth                                   | Male   | Education (years per capita)                       |              |              | X            |              |              | X            |
| Neonatal preterm birth                                   | Female | LDI (5\$ per capita)                               |              |              | X            |              |              | X            |
| Neonatal encephalopathy due to birth asphyxia and trauma | Female | LDI (5\$ per capita)                               |              |              | X            |              |              | X            |
| Neonatal encephalopathy due to birth asphyxia and trauma | Male   | Indoor Air Pollution (All Cooking Fuels)           | X            |              |              | X            |              |              |
| Neonatal encephalopathy due to birth asphyxia and trauma | Male   | Healthcare access and quality index                |              | X            |              |              | X            |              |
| Neonatal encephalopathy due to birth asphyxia and trauma | Female | Total Fertility Rate                               |              |              | X            |              |              | X            |
| Neonatal encephalopathy due to birth asphyxia and trauma | Male   | Total Fertility Rate                               |              |              | X            |              |              | X            |
| Neonatal encephalopathy due to birth asphyxia and trauma | Female | Health System Access (capped)                      |              | X            |              |              | X            |              |
| Neonatal encephalopathy due to birth asphyxia and trauma | Male   | Health System Access (capped)                      |              | X            |              |              | X            |              |
| Neonatal encephalopathy due to birth asphyxia and trauma | Female | Indoor Air Pollution (All Cooking Fuels)           | X            |              |              | X            |              |              |
| Neonatal encephalopathy due to birth asphyxia and trauma | Female | Skilled Birth Attendance (proportion)              |              | X            |              |              | X            |              |
| Neonatal encephalopathy due to birth asphyxia and trauma | Male   | Skilled Birth Attendance (proportion)              |              | X            |              |              | X            |              |
| Neonatal encephalopathy due to birth asphyxia and trauma | Female | Smoking Prevalence (Reproductive Age Standardized) | X            |              |              | X            |              |              |
| Neonatal encephalopathy due to birth asphyxia and trauma | Female | Live Births 35+ (proportion)                       |              | X            |              |              | X            |              |
| Neonatal encephalopathy due to birth asphyxia and trauma | Male   | Smoking Prevalence (Reproductive Age Standardized) | X            |              |              | X            |              |              |
| Neonatal encephalopathy due to birth asphyxia and trauma | Female | In-Facility Delivery (proportion)                  |              | X            |              |              | X            |              |
| Neonatal encephalopathy due to birth asphyxia and trauma | Male   | In-Facility Delivery (proportion)                  |              | X            |              |              | X            |              |
| Neonatal encephalopathy due to birth asphyxia and trauma | Female | Antenatal Care (4 visits) Coverage (proportion)    |              | X            |              |              | X            |              |
| Neonatal encephalopathy due to birth asphyxia and trauma | Male   | Antenatal Care (4 visits) Coverage (proportion)    |              | X            |              |              | X            |              |
| Neonatal encephalopathy due to birth asphyxia and trauma | Female | Socio-demographic Index                            |              |              | X            |              |              | X            |
| Neonatal encephalopathy due to birth asphyxia and trauma | Male   | Socio-demographic Index                            |              |              | X            |              |              | X            |
| Neonatal encephalopathy due to birth asphyxia and trauma | Female | Healthcare access and quality index                |              | X            |              |              | X            |              |
| Neonatal encephalopathy due to birth asphyxia and trauma | Male   | Education (years per capita)                       |              |              | X            |              |              | X            |
| Neonatal encephalopathy due to birth asphyxia and trauma | Female | Education (years per capita)                       |              |              | X            |              |              | X            |
| Neonatal encephalopathy due to birth asphyxia and trauma | Male   | LDI (5\$ per capita)                               |              |              | X            |              |              | X            |
| Neonatal encephalopathy due to birth asphyxia and trauma | Male   | Live Births 35+ (proportion)                       |              | X            |              |              | X            |              |
| Neonatal sepsis and other neonatal infections            | Male   | Skilled Birth Attendance (proportion)              |              | X            |              |              | X            |              |
| Neonatal sepsis and other neonatal infections            | Female | Live Births 35+ (proportion)                       |              | X            |              |              | X            |              |
| Neonatal sepsis and other neonatal infections            | Male   | Smoking Prevalence (Reproductive Age Standardized) | X            |              |              | X            |              |              |
| Neonatal sepsis and other neonatal infections            | Female | Smoking Prevalence (Reproductive Age Standardized) | X            |              |              | X            |              |              |
| Neonatal sepsis and other neonatal infections            | Female | Skilled Birth Attendance (proportion)              |              | X            |              |              | X            |              |
| Neonatal sepsis and other neonatal infections            | Male   | Health System Access (capped)                      |              | X            |              |              | X            |              |
| Neonatal sepsis and other neonatal infections            | Female | Indoor Air Pollution (All Cooking Fuels)           | X            |              |              | X            |              |              |
| Neonatal sepsis and other neonatal infections            | Female | Health System Access (capped)                      |              | X            |              |              | X            |              |
| Neonatal sepsis and other neonatal infections            | Male   | Total Fertility Rate                               |              |              | X            |              |              | X            |
| Neonatal sepsis and other neonatal infections            | Female | Total Fertility Rate                               |              |              | X            |              |              | X            |
| Neonatal sepsis and other neonatal infections            | Male   | Live Births 35+ (proportion)                       |              | X            |              |              | X            |              |
| Neonatal sepsis and other neonatal infections            | Male   | Indoor Air Pollution (All Cooking Fuels)           | X            |              |              | X            |              |              |
| Neonatal sepsis and other neonatal infections            | Female | In-Facility Delivery (proportion)                  |              | X            |              |              | X            |              |
| Neonatal sepsis and other neonatal infections            | Female | LDI (5\$ per capita)                               |              |              | X            |              |              | X            |
| Neonatal sepsis and other neonatal infections            | Female | Antenatal Care (4 visits) Coverage (proportion)    |              | X            |              |              | X            |              |
| Neonatal sepsis and other neonatal infections            | Male   | Antenatal Care (4 visits) Coverage (proportion)    |              | X            |              |              | X            |              |
| Neonatal sepsis and other neonatal infections            | Female | Socio-demographic Index                            |              |              | X            |              |              | X            |
| Neonatal sepsis and other neonatal infections            | Male   | Socio-demographic Index                            |              |              | X            |              |              | X            |
| Neonatal sepsis and other neonatal infections            | Female | Healthcare access and quality index                |              | X            |              |              | X            |              |
| Neonatal sepsis and other neonatal infections            | Male   | Healthcare access and quality index                |              | X            |              |              | X            |              |
| Neonatal sepsis and other neonatal infections            | Male   | LDI (5\$ per capita)                               |              |              | X            |              |              | X            |

Appendix Table 10: Comparison of GBD 2016 and GBD 2017 covariates and level of covariates used in cause of death modeling

| Cause                                         | Sex    | Covariate                                              | Level 1 2017 | Level 2 2017 | Level 3 2017 | Level 1 2016 | Level 2 2016 | Level 3 2016 |
|-----------------------------------------------|--------|--------------------------------------------------------|--------------|--------------|--------------|--------------|--------------|--------------|
| Neonatal sepsis and other neonatal infections | Male   | In-Facility Delivery (proportion)                      |              | X            |              |              | X            |              |
| Neonatal sepsis and other neonatal infections | Female | Education (years per capita)                           |              | X            | X            |              |              | X            |
| Neonatal sepsis and other neonatal infections | Male   | Education (years per capita)                           |              | X            | X            |              |              | X            |
| Hemolytic disease and other neonatal jaundice | Female | Antenatal Care (4 visits) Coverage (proportion)        |              | X            |              |              | X            |              |
| Hemolytic disease and other neonatal jaundice | Male   | Antenatal Care (4 visits) Coverage (proportion)        |              | X            |              |              | X            |              |
| Hemolytic disease and other neonatal jaundice | Female | Socio-demographic Index                                |              |              | X            |              |              | X            |
| Hemolytic disease and other neonatal jaundice | Male   | Socio-demographic Index                                |              |              | X            |              |              | X            |
| Hemolytic disease and other neonatal jaundice | Female | Healthcare access and quality index                    |              | X            |              |              | X            |              |
| Hemolytic disease and other neonatal jaundice | Male   | Healthcare access and quality index                    |              | X            |              |              | X            |              |
| Hemolytic disease and other neonatal jaundice | Female | Education (years per capita)                           |              |              | X            |              |              | X            |
| Hemolytic disease and other neonatal jaundice | Male   | LDI (IS per capita)                                    |              |              | X            |              |              | X            |
| Hemolytic disease and other neonatal jaundice | Female | LDI (IS per capita)                                    |              |              | X            |              |              | X            |
| Hemolytic disease and other neonatal jaundice | Male   | In-Facility Delivery (proportion)                      |              | X            |              |              | X            |              |
| Hemolytic disease and other neonatal jaundice | Female | Education (years per capita)                           |              | X            |              |              |              | X            |
| Hemolytic disease and other neonatal jaundice | Male   | In-Facility Delivery (proportion)                      |              | X            |              |              | X            |              |
| Hemolytic disease and other neonatal jaundice | Female | Health System Access (capped)                          |              |              | X            |              | X            |              |
| Hemolytic disease and other neonatal jaundice | Male   | Live Births 35+ (proportion)                           |              |              | X            |              | X            |              |
| Hemolytic disease and other neonatal jaundice | Female | Live Births 15+ (proportion)                           |              |              | X            |              | X            |              |
| Hemolytic disease and other neonatal jaundice | Male   | Total Fertility Rate                                   |              |              | X            |              |              | X            |
| Hemolytic disease and other neonatal jaundice | Female | Health System Access (capped)                          |              |              | X            |              | X            |              |
| Hemolytic disease and other neonatal jaundice | Male   | Indoor Air Pollution (All Cooking Fuels)               | X            |              |              | X            |              |              |
| Hemolytic disease and other neonatal jaundice | Female | Total Fertility Rate                                   |              |              | X            |              |              | X            |
| Hemolytic disease and other neonatal jaundice | Male   | Skilled Birth Attendance (proportion)                  |              | X            |              |              | X            |              |
| Hemolytic disease and other neonatal jaundice | Female | Skilled Birth Attendance (proportion)                  |              | X            |              |              | X            |              |
| Hemolytic disease and other neonatal jaundice | Male   | Smoking Prevalence (Reproductive Age Standardized)     | X            |              |              | X            |              |              |
| Hemolytic disease and other neonatal jaundice | Female | Smoking Prevalence (Reproductive Age Standardized)     | X            |              |              | X            |              |              |
| Hemolytic disease and other neonatal jaundice | Male   | Indoor Air Pollution (All Cooking Fuels)               | X            |              |              | X            |              |              |
| Hemolytic disease and other neonatal jaundice | Female | Health System Access (capped)                          |              |              | X            |              | X            |              |
| Other neonatal disorders                      | Male   | Health System Access (capped)                          |              |              | X            |              | X            |              |
| Other neonatal disorders                      | Female | Health System Access (capped)                          |              |              | X            |              | X            |              |
| Other neonatal disorders                      | Male   | Live Births 35+ (proportion)                           |              |              | X            |              | X            |              |
| Other neonatal disorders                      | Female | Live Births 35+ (proportion)                           |              |              | X            |              | X            |              |
| Other neonatal disorders                      | Male   | Indoor Air Pollution (All Cooking Fuels)               | X            |              |              | X            |              |              |
| Other neonatal disorders                      | Female | Indoor Air Pollution (All Cooking Fuels)               | X            |              |              | X            |              |              |
| Other neonatal disorders                      | Male   | Skilled Birth Attendance (proportion)                  |              | X            |              |              | X            |              |
| Other neonatal disorders                      | Female | Skilled Birth Attendance (proportion)                  |              | X            |              |              | X            |              |
| Other neonatal disorders                      | Male   | Smoking Prevalence (Reproductive Age Standardized)     | X            |              |              | X            |              |              |
| Other neonatal disorders                      | Female | Smoking Prevalence (Reproductive Age Standardized)     | X            |              |              | X            |              |              |
| Other neonatal disorders                      | Male   | Live Births 35+ (proportion)                           |              |              | X            |              | X            |              |
| Other neonatal disorders                      | Female | Live Births 35+ (proportion)                           |              |              | X            |              | X            |              |
| Other neonatal disorders                      | Male   | In-Facility Delivery (proportion)                      |              |              | X            |              |              | X            |
| Other neonatal disorders                      | Female | In-Facility Delivery (proportion)                      |              |              | X            |              |              | X            |
| Other neonatal disorders                      | Male   | Healthcare access and quality index                    |              | X            |              |              | X            |              |
| Other neonatal disorders                      | Female | Healthcare access and quality index                    |              | X            |              |              | X            |              |
| Other neonatal disorders                      | Male   | Antenatal Care (4 visits) Coverage (proportion)        |              |              | X            |              | X            |              |
| Other neonatal disorders                      | Female | Antenatal Care (4 visits) Coverage (proportion)        |              |              | X            |              | X            |              |
| Other neonatal disorders                      | Male   | Socio-demographic Index                                |              |              | X            |              |              | X            |
| Other neonatal disorders                      | Female | Socio-demographic Index                                |              |              | X            |              |              | X            |
| Other neonatal disorders                      | Male   | Healthcare access and quality index                    |              | X            |              |              | X            |              |
| Other neonatal disorders                      | Female | Healthcare access and quality index                    |              | X            |              |              | X            |              |
| Other neonatal disorders                      | Male   | LDI (IS per capita)                                    |              |              | X            |              |              | X            |
| Other neonatal disorders                      | Female | LDI (IS per capita)                                    |              |              | X            |              |              | X            |
| Other neonatal disorders                      | Male   | Education (years per capita)                           |              |              | X            |              |              | X            |
| Other neonatal disorders                      | Female | Education (years per capita)                           |              |              | X            |              |              | X            |
| Other neonatal disorders                      | Male   | Total Fertility Rate                                   |              |              | X            |              |              | X            |
| Other neonatal disorders                      | Female | Total Fertility Rate                                   |              |              | X            |              |              | X            |
| Other neonatal disorders                      | Male   | In-Facility Delivery (proportion)                      |              | X            |              |              | X            |              |
| Other neonatal disorders                      | Female | Total Fertility Rate                                   |              | X            |              |              | X            |              |
| Nutritional deficiencies                      | Male   | energy unadjusted(kcal)                                | X            |              |              | X            |              | X            |
| Nutritional deficiencies                      | Female | energy unadjusted(kcal)                                | X            |              |              | X            |              | X            |
| Nutritional deficiencies                      | Male   | Health System Access (capped)                          |              |              | X            |              | X            |              |
| Nutritional deficiencies                      | Female | Health System Access (capped)                          |              |              | X            |              | X            |              |
| Nutritional deficiencies                      | Male   | LDI (IS per capita)                                    |              |              | X            |              |              | X            |
| Nutritional deficiencies                      | Female | LDI (IS per capita)                                    |              |              | X            |              |              | X            |
| Nutritional deficiencies                      | Male   | Socio-demographic Index                                |              |              | X            |              |              | X            |
| Nutritional deficiencies                      | Female | Socio-demographic Index                                |              |              | X            |              |              | X            |
| Nutritional deficiencies                      | Male   | Healthcare access and quality index                    |              | X            |              |              | X            |              |
| Nutritional deficiencies                      | Female | Healthcare access and quality index                    |              | X            |              |              | X            |              |
| Nutritional deficiencies                      | Male   | Age-Standardize Prevalence of Severe Anemia            | X            |              |              | X            |              |              |
| Nutritional deficiencies                      | Female | Age-Standardize Prevalence of Severe Anemia            | X            |              |              | X            |              |              |
| Nutritional deficiencies                      | Male   | LDI (IS per capita)                                    |              |              | X            |              |              | X            |
| Nutritional deficiencies                      | Female | LDI (IS per capita)                                    |              |              | X            |              |              | X            |
| Nutritional deficiencies                      | Male   | Education (years per capita)                           |              |              | X            |              |              | X            |
| Nutritional deficiencies                      | Female | Education (years per capita)                           |              |              | X            |              |              | X            |
| Nutritional deficiencies                      | Male   | energy unadjusted(kcal)                                | X            |              |              | X            |              | X            |
| Nutritional deficiencies                      | Female | energy unadjusted(kcal)                                | X            |              |              | X            |              | X            |
| Nutritional deficiencies                      | Male   | Health System Access (capped)                          |              |              | X            |              | X            |              |
| Nutritional deficiencies                      | Female | Health System Access (capped)                          |              |              | X            |              | X            |              |
| Nutritional deficiencies                      | Male   | Improved Water Source (proportion with access)         |              |              | X            |              | X            |              |
| Nutritional deficiencies                      | Female | Improved Water Source (proportion with access)         |              |              | X            |              | X            |              |
| Nutritional deficiencies                      | Male   | Rainfall Quintile 2 (proportion)                       |              |              | X            |              | X            |              |
| Nutritional deficiencies                      | Female | Rainfall Quintile 2 (proportion)                       |              |              | X            |              | X            |              |
| Nutritional deficiencies                      | Male   | Rainfall Quintile 1 (proportion)                       |              |              | X            |              | X            |              |
| Nutritional deficiencies                      | Female | Rainfall Quintile 1 (proportion)                       |              |              | X            |              | X            |              |
| Nutritional deficiencies                      | Male   | Proportion of households using iodized salt (adjusted) | X            |              |              | X            |              |              |
| Nutritional deficiencies                      | Female | Proportion of households using iodized salt (adjusted) | X            |              |              | X            |              |              |
| Nutritional deficiencies                      | Male   | Mortality Rate Due to War Shocks (per 1 person)        |              |              | X            |              | X            |              |
| Nutritional deficiencies                      | Female | Mortality Rate Due to War Shocks (per 1 person)        |              |              | X            |              | X            |              |
| Nutritional deficiencies                      | Male   | Sanitation (proportion with access)                    |              |              | X            |              | X            |              |
| Nutritional deficiencies                      | Female | Sanitation (proportion with access)                    |              |              | X            |              | X            |              |
| Nutritional deficiencies                      | Male   | Mortality Rate Due to War Shocks (per 1 person)        |              |              | X            |              | X            |              |
| Nutritional deficiencies                      | Female | Mortality Rate Due to War Shocks (per 1 person)        |              |              | X            |              | X            |              |
| Nutritional deficiencies                      | Male   | Age-Standardize Prevalence of Severe Anemia            | X            |              |              | X            |              |              |
| Nutritional deficiencies                      | Female | Age-Standardize Prevalence of Severe Anemia            | X            |              |              | X            |              |              |
| Protein-energy malnutrition                   | Male   | Age-Standardize Prevalence of Severe Anemia            | X            |              |              | X            |              |              |
| Protein-energy malnutrition                   | Female | Age-Standardize Prevalence of Severe Anemia            | X            |              |              | X            |              |              |
| Protein-energy malnutrition                   | Male   | Antenatal Care (4 visits) Coverage (proportion)        |              |              | X            |              |              | X            |
| Protein-energy malnutrition                   | Female | Antenatal Care (4 visits) Coverage (proportion)        |              |              | X            |              |              | X            |
| Protein-energy malnutrition                   | Male   | energy unadjusted(kcal)                                | X            |              |              | X            |              | X            |
| Protein-energy malnutrition                   | Female | energy unadjusted(kcal)                                | X            |              |              | X            |              | X            |
| Protein-energy malnutrition                   | Male   | Socio-demographic Index                                |              |              | X            |              |              | X            |
| Protein-energy malnutrition                   | Female | Socio-demographic Index                                |              |              | X            |              |              | X            |
| Protein-energy malnutrition                   | Male   | Healthcare access and quality index                    |              | X            |              |              | X            |              |
| Protein-energy malnutrition                   | Female | Healthcare access and quality index                    |              | X            |              |              | X            |              |
| Protein-energy malnutrition                   | Male   | Health System Access (capped)                          |              |              | X            |              | X            |              |
| Protein-energy malnutrition                   | Female | Health System Access (capped)                          |              |              | X            |              | X            |              |
| Protein-energy malnutrition                   | Male   | LDI (IS per capita)                                    |              |              | X            |              |              | X            |
| Protein-energy malnutrition                   | Female | LDI (IS per capita)                                    |              |              | X            |              |              | X            |
| Protein-energy malnutrition                   | Male   | Malnutrition Shock mortality rate                      | X            |              |              | X            |              | X            |
| Protein-energy malnutrition                   | Female | Malnutrition Shock mortality rate                      | X            |              |              | X            |              | X            |
| Protein-energy malnutrition                   | Male   | LDI (IS per capita)                                    |              |              | X            |              |              | X            |
| Protein-energy malnutrition                   | Female | LDI (IS per capita)                                    |              |              | X            |              |              | X            |
| Protein-energy malnutrition                   | Male   | Education (years per capita)                           |              |              | X            |              |              | X            |
| Protein-energy malnutrition                   | Female | Education (years per capita)                           |              |              | X            |              |              | X            |
| Protein-energy malnutrition                   | Male   | Health System Access (capped)                          |              |              | X            |              | X            |              |
| Protein-energy malnutrition                   | Female | Health System Access (capped)                          |              |              | X            |              | X            |              |
| Protein-energy malnutrition                   | Male   | Rainfall Quintile 2 (proportion)                       |              |              | X            |              | X            |              |
| Protein-energy malnutrition                   | Female | Rainfall Quintile 2 (proportion)                       |              |              | X            |              | X            |              |
| Protein-energy malnutrition                   | Male   | Rainfall Quintile 1 (proportion)                       |              |              | X            |              | X            |              |
| Protein-energy malnutrition                   | Female | Rainfall Quintile 1 (proportion)                       |              |              | X            |              | X            |              |
| Protein-energy malnutrition                   | Male   | Rainfall Quintile 1 (proportion)                       |              |              | X            |              | X            |              |
| Protein-energy malnutrition                   | Female | Rainfall Quintile 1 (proportion)                       |              |              | X            |              | X            |              |
| Protein-energy malnutrition                   | Male   | Mortality Rate Due to War Shocks (per 1 person)        |              |              | X            |              | X            |              |
| Protein-energy malnutrition                   | Female | Mortality Rate Due to War Shocks (per 1 person)        |              |              | X            |              | X            |              |
| Protein-energy malnutrition                   | Male   | Education (years per capita)                           |              |              | X            |              |              | X            |
| Protein-energy malnutrition                   | Female | Education (years per capita)                           |              |              | X            |              |              | X            |
| Protein-energy malnutrition                   | Male   | Age-Standardize Prevalence of Severe Anemia            | X            |              |              | X            |              |              |
| Protein-energy malnutrition                   | Female | Age-Standardize Prevalence of Severe Anemia            | X            |              |              | X            |              |              |
| Dietary iron deficiency                       | Male   | Sanitation (proportion with access)                    |              | X            |              |              | X            |              |
| Dietary iron deficiency                       | Female | Sanitation (proportion with access)                    |              | X            |              |              | X            |              |
| Dietary iron deficiency                       | Male   | Rainfall Quintile 2 (proportion)                       |              |              | X            |              | X            |              |
| Dietary iron deficiency                       | Female | Rainfall Quintile 2 (proportion)                       |              |              | X            |              | X            |              |
| Dietary iron deficiency                       | Male   | Improved Water Source (proportion with access)         |              |              | X            |              | X            |              |
| Dietary iron deficiency                       | Female | Improved Water Source (proportion with access)         |              |              | X            |              | X            |              |
| Dietary iron deficiency                       | Male   | Underweight (proportion <2SD weight for age, <5 years) | X            |              |              | X            |              |              |
| Dietary iron deficiency                       | Female | Underweight (proportion <2SD weight for age, <5 years) | X            |              |              | X            |              |              |
| Dietary iron deficiency                       | Male   | Rainfall Quintile 2 (proportion)                       |              |              | X            |              | X            |              |
| Dietary iron deficiency                       | Female | Rainfall Quintile 2 (proportion)                       |              |              | X            |              | X            |              |
| Dietary iron deficiency                       | Male   | Rainfall Quintile 1 (proportion)                       |              |              | X            |              | X            |              |
| Dietary iron deficiency                       | Female | Rainfall Quintile 1 (proportion)                       |              |              | X            |              | X            |              |
| Dietary iron deficiency                       | Male   | Age-Standardize Prevalence of Severe Anemia            | X            |              |              | X            |              |              |
| Dietary iron deficiency                       | Female | Age-Standardize Prevalence of Severe Anemia            | X            |              |              | X            |              |              |
| Dietary iron deficiency                       | Male   | Sanitation (proportion with access)                    |              | X            |              |              | X            |              |
| Dietary iron deficiency                       | Female | Sanitation (proportion with access)                    |              | X            |              |              | X            |              |
| Dietary iron deficiency                       | Male   | Health System Access (capped)                          |              |              | X            |              | X            |              |
| Dietary iron deficiency                       | Female | Health System Access (capped)                          |              |              | X            |              | X            |              |
| Dietary iron deficiency                       | Male   | Socio-demographic Index                                |              |              | X            |              |              | X            |
| Dietary iron deficiency                       | Female | Socio-demographic Index                                |              |              | X            |              |              | X            |
| Dietary iron deficiency                       | Male   | Health System Access 2 (unfitted)                      |              | X            |              |              | X            |              |
| Dietary iron deficiency                       | Female | Health System Access 2 (unfitted)                      |              | X            |              |              | X            |              |
| Dietary iron deficiency                       | Male   | Health System Access 2 (unfitted)                      |              | X            |              |              | X            |              |
| Dietary iron deficiency                       | Female | Health System Access 2 (unfitted)                      |              | X            |              |              | X            |              |
| Dietary iron deficiency                       | Male   | Healthcare access and quality index                    |              | X            |              |              | X            |              |
| Dietary iron deficiency                       | Female | Healthcare access and quality index                    |              | X            |              |              | X            |              |



Appendix Table 10: Comparison of GBD 2016 and GBD 2017 covariates and level of covariates used in cause of death modeling

| Cause                                         | Sex    | Covariate                                              | Level 2 2017 | Level 2 2017 | Level 3 2017 | Level 1 2016 | Level 2 2016 | Level 3 2016 |
|-----------------------------------------------|--------|--------------------------------------------------------|--------------|--------------|--------------|--------------|--------------|--------------|
| Dietary iron deficiency                       | Female | LDI (\$ per capita)                                    |              |              | X            |              |              | X            |
| Dietary iron deficiency                       | Male   | LDI (\$ per capita)                                    |              |              | X            |              |              | X            |
| Dietary iron deficiency                       | Female | Education (years per capita)                           |              |              | X            |              |              | X            |
| Dietary iron deficiency                       | Male   | Education (years per capita)                           |              |              | X            |              |              | X            |
| Dietary iron deficiency                       | Male   | Health System Access (capped)                          |              | X            |              |              | X            |              |
| Other nutritional deficiencies                | Female | LDI (\$ per capita)                                    |              |              | X            |              |              | X            |
| Other nutritional deficiencies                | Female | Healthcare access and quality index                    |              | X            |              |              | X            |              |
| Other nutritional deficiencies                | Male   | Healthcare access and quality index                    |              | X            |              |              | X            |              |
| Other nutritional deficiencies                | Female | Socio-demographic Index                                |              |              | X            |              |              | X            |
| Other nutritional deficiencies                | Female | Health System Access (capped)                          |              | X            |              |              | X            |              |
| Other nutritional deficiencies                | Female | energy unadjusted(kcal)                                |              | X            |              |              | X            |              |
| Other nutritional deficiencies                | Male   | energy unadjusted(kcal)                                |              | X            |              |              | X            |              |
| Other nutritional deficiencies                | Male   | Education (years per capita)                           |              |              | X            |              |              | X            |
| Other nutritional deficiencies                | Male   | Health System Access (capped)                          |              | X            |              |              | X            |              |
| Other nutritional deficiencies                | Male   | Socio-demographic Index                                |              |              | X            |              |              | X            |
| Other nutritional deficiencies                | Female | Education (years per capita)                           |              |              | X            |              |              | X            |
| Other nutritional deficiencies                | Male   | LDI (\$ per capita)                                    |              |              | X            |              |              | X            |
| Other nutritional deficiencies                | Female | Malnutrition Shock mortality rate                      | X            |              |              | X            |              |              |
| Other nutritional deficiencies                | Male   | Malnutrition Shock mortality rate                      | X            |              |              | X            |              |              |
| Other nutritional deficiencies                | Female | Rainfall Quintile 2 (proportion)                       |              | X            |              |              | X            |              |
| Other nutritional deficiencies                | Female | Rainfall Quintile 1 (proportion)                       |              | X            |              |              | X            |              |
| Other nutritional deficiencies                | Male   | Rainfall Quintile 1 (proportion)                       |              | X            |              |              | X            |              |
| Other nutritional deficiencies                | Female | Rainfall Quintile 2 (proportion)                       |              | X            |              |              | X            |              |
| Other nutritional deficiencies                | Male   | Mortality Rate Due to War Shocks (per 1 person)        |              | X            |              |              | X            |              |
| Other nutritional deficiencies                | Female | Age-Standardize Prevalence of Severe Anemia            | X            |              |              | X            |              |              |
| Other nutritional deficiencies                | Male   | Age-Standardize Prevalence of Severe Anemia            | X            |              |              | X            |              |              |
| Other nutritional deficiencies                | Female | Mortality Rate Due to War Shocks (per 1 person)        |              | X            |              |              | X            |              |
| Sexually transmitted infections excluding HIV | Male   | Healthcare access and quality index                    |              | X            |              |              | X            |              |
| Sexually transmitted infections excluding HIV | Female | Antenatal Care (4 visits) Coverage (proportion)        |              |              | X            |              |              | X            |
| Sexually transmitted infections excluding HIV | Female | Healthcare access and quality index                    |              | X            |              |              | X            |              |
| Sexually transmitted infections excluding HIV | Male   | Legality of Abortion                                   |              | X            |              |              | X            |              |
| Sexually transmitted infections excluding HIV | Female | Legality of Abortion                                   |              | X            |              |              | X            |              |
| Sexually transmitted infections excluding HIV | Male   | Antenatal Care (1 visit) Coverage (proportion)         |              |              | X            |              |              | X            |
| Sexually transmitted infections excluding HIV | Female | Antenatal Care (1 visit) Coverage (proportion)         |              |              | X            |              |              | X            |
| Sexually transmitted infections excluding HIV | Male   | Antenatal Care (4 visits) Coverage (proportion)        |              |              | X            |              |              | X            |
| Sexually transmitted infections excluding HIV | Male   | Health System Access (capped)                          |              | X            |              |              | X            |              |
| Sexually transmitted infections excluding HIV | Female | Age-Specific Fertility Rate                            |              | X            |              |              | X            |              |
| Sexually transmitted infections excluding HIV | Male   | Total Fertility Rate                                   |              | X            |              |              | X            |              |
| Sexually transmitted infections excluding HIV | Female | Total Fertility Rate                                   |              | X            |              |              | X            |              |
| Sexually transmitted infections excluding HIV | Male   | Age-Specific Fertility Rate                            |              | X            |              |              | X            |              |
| Sexually transmitted infections excluding HIV | Male   | Syphilis prevalence (proportion)                       | X            |              |              | X            |              |              |
| Sexually transmitted infections excluding HIV | Female | Syphilis prevalence (proportion)                       | X            |              |              | X            |              |              |
| Sexually transmitted infections excluding HIV | Female | LDI (\$ per capita)                                    |              |              | X            |              |              | X            |
| Sexually transmitted infections excluding HIV | Male   | Education (years per capita)                           |              | X            |              |              | X            |              |
| Sexually transmitted infections excluding HIV | Female | Education (years per capita)                           |              | X            |              |              | X            |              |
| Sexually transmitted infections excluding HIV | Female | Health System Access (capped)                          |              | X            |              |              | X            |              |
| Sexually transmitted infections excluding HIV | Male   | LDI (\$ per capita)                                    |              |              | X            |              |              | X            |
| Acute hepatitis                               | Female | LDI (\$ per capita)                                    |              | X            |              |              |              | X            |
| Acute hepatitis                               | Male   | Log-transformed SEV scalar: Hep                        | X            |              |              | X            |              |              |
| Acute hepatitis                               | Male   | LDI (\$ per capita)                                    |              | X            |              |              |              | X            |
| Acute hepatitis                               | Male   | Education (years per capita)                           |              |              | X            |              |              | X            |
| Acute hepatitis                               | Male   | Socio-demographic Index                                |              |              | X            |              | X            |              |
| Acute hepatitis                               | Female | Hepatitis B (HbS)Ag Seroprevalence                     | X            |              |              | X            |              |              |
| Acute hepatitis                               | Female | Hepatitis B (HbS)Ag Seroprevalence                     | X            |              |              | X            |              |              |
| Acute hepatitis                               | Male   | Hepatitis B (HbS)Ag Seroprevalence                     | X            |              |              | X            |              |              |
| Acute hepatitis                               | Female | Hepatitis C (IgG) Seroprevalence                       | X            |              |              | X            |              |              |
| Acute hepatitis                               | Female | Hepatitis C (IgG) Seroprevalence                       | X            |              |              | X            |              |              |
| Acute hepatitis                               | Male   | Hepatitis C (IgG) Seroprevalence                       | X            |              |              | X            |              |              |
| Acute hepatitis                               | Female | Education (years per capita)                           |              |              | X            |              |              | X            |
| Acute hepatitis                               | Male   | Socio-demographic Index                                |              |              | X            |              |              | X            |
| Acute hepatitis                               | Female | Log-transformed SEV scalar: Hep                        | X            |              |              | X            |              |              |
| Acute hepatitis                               | Female | Log-transformed SEV scalar: Hep                        | X            |              |              | X            |              |              |
| Acute hepatitis                               | Male   | Seroprevalence of anti-HEV (IgG)                       | X            |              |              | X            |              |              |
| Acute hepatitis                               | Male   | Seroprevalence of anti-HAV (IgG)                       | X            |              |              | X            |              |              |
| Acute hepatitis                               | Female | Seroprevalence of anti-HEV (IgG)                       | X            |              |              | X            |              |              |
| Acute hepatitis                               | Male   | Log-transformed SEV scalar: Hep                        | X            |              |              |              | X            |              |
| Acute hepatitis                               | Female | Seroprevalence of anti-HAV (IgG)                       | X            |              |              | X            |              |              |
| Acute hepatitis                               | Female | Seroprevalence of anti-HAV (IgG)                       | X            |              |              | X            |              |              |
| Acute hepatitis                               | Female | Socio-demographic Index                                |              |              | X            |              | X            |              |
| Acute hepatitis                               | Female | Socio-demographic Index                                |              |              | X            |              | X            |              |
| Acute hepatitis                               | Female | Seroprevalence of anti-HEV (IgG)                       | X            |              |              | X            |              |              |
| Other unspecified infectious diseases         | Female | Rainfall Quintile 1 (proportion)                       |              | X            |              |              | X            |              |
| Other unspecified infectious diseases         | Male   | Measles Vaccine Coverage (proportion)                  | X            |              |              | X            |              |              |
| Other unspecified infectious diseases         | Male   | Rainfall Quintile 3 (proportion)                       |              | X            |              |              | X            |              |
| Other unspecified infectious diseases         | Female | Rainfall Quintile 3 (proportion)                       |              | X            |              |              | X            |              |
| Other unspecified infectious diseases         | Male   | Rainfall Quintile 2 (proportion)                       |              | X            |              |              | X            |              |
| Other unspecified infectious diseases         | Female | Rainfall Quintile 2 (proportion)                       |              | X            |              |              | X            |              |
| Other unspecified infectious diseases         | Male   | Rainfall Quintile 1 (proportion)                       |              | X            |              |              | X            |              |
| Other unspecified infectious diseases         | Male   | Rainfall Quintile 4 (proportion)                       |              | X            |              |              | X            |              |
| Other unspecified infectious diseases         | Female | DTP3 Coverage (proportion)                             | X            |              |              | X            |              |              |
| Other unspecified infectious diseases         | Male   | Improved Water Source (proportion with access)         |              | X            |              |              | X            |              |
| Other unspecified infectious diseases         | Male   | Socio-demographic Index                                |              |              | X            |              |              | X            |
| Other unspecified infectious diseases         | Female | DTP3 Coverage (proportion)                             | X            |              |              |              |              | X            |
| Other unspecified infectious diseases         | Female | DTP3 Coverage (proportion)                             |              |              | X            |              |              | X            |
| Other unspecified infectious diseases         | Female | DTP3 Coverage (proportion)                             |              |              | X            |              |              | X            |
| Other unspecified infectious diseases         | Female | Health System Access (unlabeled)                       | X            |              |              | X            |              |              |
| Other unspecified infectious diseases         | Female | Measles Vaccine Coverage (proportion)                  | X            |              |              | X            |              |              |
| Other unspecified infectious diseases         | Female | Rainfall Quintile 4 (proportion)                       |              | X            |              |              | X            |              |
| Other unspecified infectious diseases         | Male   | Health System Access (unlabeled)                       | X            |              |              | X            |              |              |
| Other unspecified infectious diseases         | Male   | DTP3 Coverage (proportion)                             |              |              | X            |              |              | X            |
| Other unspecified infectious diseases         | Male   | DTP3 Coverage (proportion)                             | X            |              |              | X            |              |              |
| Other unspecified infectious diseases         | Male   | Latitude 15 to 30 (proportion)                         |              | X            |              |              | X            |              |
| Other unspecified infectious diseases         | Male   | Latitude 15 to 30 (proportion)                         |              | X            |              |              |              | X            |
| Other unspecified infectious diseases         | Female | Underweight (proportion <2SD weight for age, <5 years) | X            |              |              |              | X            |              |
| Other unspecified infectious diseases         | Female | Underweight (proportion <2SD weight for age, <5 years) | X            |              |              | X            |              |              |
| Other unspecified infectious diseases         | Female | Underweight (proportion <2SD weight for age, <5 years) |              | X            |              |              | X            |              |
| Other unspecified infectious diseases         | Female | Underweight (proportion <2SD weight for age, <5 years) |              | X            |              |              | X            |              |
| Other unspecified infectious diseases         | Female | Improved Water Source (proportion with access)         | X            |              |              |              | X            |              |
| Other unspecified infectious diseases         | Female | Sanitation (proportion with access)                    | X            |              |              |              | X            |              |
| Other unspecified infectious diseases         | Female | Health System Access (capped)                          | X            |              |              |              | X            |              |
| Other unspecified infectious diseases         | Female | Antenatal Care (1 visit) Coverage (proportion)         | X            |              |              | X            |              | X            |
| Other unspecified infectious diseases         | Female | Antenatal Care (1 visit) Coverage (proportion)         | X            |              |              | X            |              | X            |
| Other unspecified infectious diseases         | Male   | DTP3 Coverage (proportion)                             |              |              | X            |              |              | X            |
| Other unspecified infectious diseases         | Female | Antenatal Care (1 visit) Coverage (proportion)         |              | X            |              |              | X            |              |
| Other unspecified infectious diseases         | Male   | Antenatal Care (1 visit) Coverage (proportion)         | X            |              |              |              | X            |              |
| Other unspecified infectious diseases         | Male   | Antenatal Care (1 visit) Coverage (proportion)         | X            |              |              |              | X            |              |
| Other unspecified infectious diseases         | Male   | Antenatal Care (1 visit) Coverage (proportion)         |              | X            |              |              | X            |              |
| Other unspecified infectious diseases         | Female | Socio-demographic Index                                |              |              | X            |              |              | X            |
| Other unspecified infectious diseases         | Male   | Underweight (proportion <2SD weight for age, <5 years) | X            |              |              |              | X            |              |
| Other unspecified infectious diseases         | Male   | Underweight (proportion <2SD weight for age, <5 years) | X            |              |              |              | X            |              |
| Other unspecified infectious diseases         | Male   | Underweight (proportion <2SD weight for age, <5 years) |              | X            |              |              | X            |              |
| Other unspecified infectious diseases         | Male   | Underweight (proportion <2SD weight for age, <5 years) |              | X            |              |              | X            |              |
| Other unspecified infectious diseases         | Female | LDI (\$ per capita)                                    |              |              | X            |              |              | X            |
| Other unspecified infectious diseases         | Female | Healthcare access and quality index                    |              | X            |              |              | X            |              |
| Other unspecified infectious diseases         | Female | LDI (\$ per capita)                                    |              |              | X            |              |              | X            |
| Other unspecified infectious diseases         | Female | Education (years per capita)                           |              |              | X            |              |              | X            |
| Other unspecified infectious diseases         | Male   | Latitude 15 to 30 (proportion)                         |              |              | X            |              |              | X            |



Appendix Table 10: Comparison of GBD 2016 and GBD 2017 covariates and level of covariates used in cause of death modeling

| Cause                               | Sex    | Covariate                                           | Level 1 2017 | Level 2 2017 | Level 3 2017 | Level 1 2016 | Level 2 2016 | Level 3 2016 |
|-------------------------------------|--------|-----------------------------------------------------|--------------|--------------|--------------|--------------|--------------|--------------|
| Larynx cancer                       | Female | Healthcare access and quality index                 |              | X            |              |              | X            |              |
| Larynx cancer                       | Male   | Healthcare access and quality index                 |              | X            |              |              | X            |              |
| Larynx cancer                       | Female | Population Density (under 150 ppl/sqkm, proportion) |              |              | X            |              | X            |              |
| Larynx cancer                       | Male   | Population Density (under 150 ppl/sqkm, proportion) |              |              | X            |              | X            |              |
| Larynx cancer                       | Female | Population Density (over 1000 ppl/sqkm, proportion) |              |              | X            |              | X            |              |
| Larynx cancer                       | Male   | Population Density (over 1000 ppl/sqkm, proportion) |              |              | X            |              | X            |              |
| Larynx cancer                       | Female | LDI (5 per capita)                                  |              |              | X            |              |              | X            |
| Larynx cancer                       | Male   | LDI (5 per capita)                                  |              |              | X            |              |              | X            |
| Larynx cancer                       | Female | Education (years per capita)                        |              |              | X            |              |              | X            |
| Larynx cancer                       | Male   | Education (years per capita)                        |              |              | X            |              |              | X            |
| Larynx cancer                       | Female | Alcohol (liters per capita)                         | X            |              |              | X            |              |              |
| Larynx cancer                       | Male   | Alcohol (liters per capita)                         | X            |              |              | X            |              |              |
| Larynx cancer                       | Male   | Socio-demographic Index                             |              |              | X            |              |              | X            |
| Larynx cancer                       | Male   | Smoking Prevalence                                  |              | X            |              |              | X            |              |
| Larynx cancer                       | Female | Smoking Prevalence                                  |              |              |              |              | X            |              |
| Larynx cancer                       | Male   | fruits adjusted(g)                                  |              | X            |              |              | X            |              |
| Larynx cancer                       | Male   | Tobacco (cigarettes per capita)                     |              | X            |              |              | X            |              |
| Larynx cancer                       | Male   | Log-transformed SEV scalar: Larynx C                | X            |              |              | X            |              |              |
| Larynx cancer                       | Female | Cumulative Cigarettes (20 Years)                    |              | X            |              |              | X            |              |
| Larynx cancer                       | Male   | Cumulative Cigarettes (20 Years)                    |              | X            |              |              | X            |              |
| Larynx cancer                       | Female | Cumulative Cigarettes (15 Years)                    |              | X            |              |              | X            |              |
| Larynx cancer                       | Male   | Cumulative Cigarettes (15 Years)                    |              | X            |              |              | X            |              |
| Larynx cancer                       | Female | Tobacco (cigarettes per capita)                     |              |              | X            |              | X            |              |
| Larynx cancer                       | Female | Tobacco (cigarettes per capita)                     |              |              | X            |              | X            |              |
| Larynx cancer                       | Female | fruits adjusted(g)                                  |              | X            |              |              | X            |              |
| Larynx cancer                       | Female | Log-transformed SEV scalar: Larynx C                | X            |              |              | X            |              |              |
| Larynx cancer                       | Female | Cumulative Cigarettes (5 Years)                     |              | X            |              |              | X            |              |
| Larynx cancer                       | Male   | Cumulative Cigarettes (5 Years)                     |              | X            |              |              | X            |              |
| Larynx cancer                       | Female | Cumulative Cigarettes (10 Years)                    |              | X            |              |              | X            |              |
| Larynx cancer                       | Male   | Cumulative Cigarettes (10 Years)                    |              | X            |              |              | X            |              |
| Larynx cancer                       | Female | vegetables adjusted(g)                              |              |              | X            |              | X            |              |
| Larynx cancer                       | Male   | vegetables adjusted(g)                              |              |              | X            |              | X            |              |
| Larynx cancer                       | Male   | Tobacco (cigarettes per capita)                     |              |              | X            |              | X            |              |
| Tracheal, bronchus, and lung cancer | Female | Healthcare access and quality index                 |              |              | X            |              | X            |              |
| Tracheal, bronchus, and lung cancer | Male   | LDI (5 per capita)                                  |              |              | X            |              |              | X            |
| Tracheal, bronchus, and lung cancer | Female | Smoking Prevalence                                  | X            |              |              | X            |              |              |
| Tracheal, bronchus, and lung cancer | Male   | Education (years per capita)                        |              |              | X            |              |              | X            |
| Tracheal, bronchus, and lung cancer | Female | Education (years per capita)                        |              |              | X            |              |              | X            |
| Tracheal, bronchus, and lung cancer | Male   | Healthcare access and quality index                 |              | X            |              |              | X            |              |
| Tracheal, bronchus, and lung cancer | Female | LDI (5 per capita)                                  |              |              | X            |              |              | X            |
| Tracheal, bronchus, and lung cancer | Female | Socio-demographic Index                             |              |              | X            |              |              | X            |
| Tracheal, bronchus, and lung cancer | Female | Cumulative Cigarettes (5 Years)                     | X            |              |              | X            |              |              |
| Tracheal, bronchus, and lung cancer | Female | Indoor Air Pollution (All Cooking Fuels)            |              | X            |              |              | X            |              |
| Tracheal, bronchus, and lung cancer | Male   | Log-transformed age-standardized SEV scalar: Lung C | X            |              |              | X            |              |              |
| Tracheal, bronchus, and lung cancer | Female | Log-transformed age-standardized SEV scalar: Lung C | X            |              |              | X            |              |              |
| Tracheal, bronchus, and lung cancer | Male   | Log-transformed SEV scalar: Lung C                  | X            |              |              | X            |              |              |
| Tracheal, bronchus, and lung cancer | Female | Log-transformed SEV scalar: Lung C                  | X            |              |              | X            |              |              |
| Tracheal, bronchus, and lung cancer | Male   | Cumulative Cigarettes (20 Years)                    | X            |              |              | X            |              |              |
| Tracheal, bronchus, and lung cancer | Female | Cumulative Cigarettes (20 Years)                    | X            |              |              | X            |              |              |
| Tracheal, bronchus, and lung cancer | Male   | Cumulative Cigarettes (15 Years)                    | X            |              |              | X            |              |              |
| Tracheal, bronchus, and lung cancer | Male   | Socio-demographic Index                             |              |              | X            |              |              | X            |
| Tracheal, bronchus, and lung cancer | Female | Tobacco (cigarettes per capita)                     | X            |              |              | X            |              |              |
| Tracheal, bronchus, and lung cancer | Male   | Cumulative Cigarettes (15 Years)                    | X            |              |              | X            |              |              |
| Tracheal, bronchus, and lung cancer | Female | Cumulative Cigarettes (5 Years)                     | X            |              |              | X            |              |              |
| Tracheal, bronchus, and lung cancer | Male   | Cumulative Cigarettes (5 Years)                     | X            |              |              | X            |              |              |
| Tracheal, bronchus, and lung cancer | Female | Cumulative Cigarettes (10 Years)                    | X            |              |              | X            |              |              |
| Tracheal, bronchus, and lung cancer | Male   | Cumulative Cigarettes (10 Years)                    | X            |              |              | X            |              |              |
| Tracheal, bronchus, and lung cancer | Male   | Smoking Prevalence                                  | X            |              |              | X            |              |              |
| Tracheal, bronchus, and lung cancer | Male   | Outdoor Air Pollution (PM2.5)                       |              | X            |              |              | X            |              |
| Tracheal, bronchus, and lung cancer | Female | Outdoor Air Pollution (PM2.5)                       |              | X            |              |              | X            |              |
| Tracheal, bronchus, and lung cancer | Male   | Indoor Air Pollution (All Cooking Fuels)            |              | X            |              |              | X            |              |
| Tracheal, bronchus, and lung cancer | Female | Tobacco (cigarettes per capita)                     | X            |              |              | X            |              |              |
| Breast cancer                       | Male   | Cumulative Cigarettes (10 Years)                    |              | X            |              |              | X            |              |
| Breast cancer                       | Female | fruits adjusted(g)                                  |              | X            |              |              | X            |              |
| Breast cancer                       | Male   | vegetables adjusted(g)                              |              | X            |              |              | X            |              |
| Breast cancer                       | Female | vegetables adjusted(g)                              |              | X            |              |              | X            |              |
| Breast cancer                       | Female | Cumulative Cigarettes (10 Years)                    |              | X            |              |              | X            |              |
| Breast cancer                       | Male   | Alcohol (liters per capita)                         | X            |              |              | X            |              |              |
| Breast cancer                       | Female | Total Fertility Rate                                |              | X            |              |              | X            |              |
| Breast cancer                       | Male   | Log-transformed SEV scalar: Breast C                | X            |              |              | X            |              |              |
| Breast cancer                       | Female | Log-transformed SEV scalar: Breast C                | X            |              |              | X            |              |              |
| Breast cancer                       | Female | Age-Specific Fertility Rate                         |              | X            |              |              | X            |              |
| Breast cancer                       | Female | Age-Specific Fertility Rate                         |              | X            |              |              | X            |              |
| Breast cancer                       | Female | Total Fertility Rate                                |              | X            |              |              | X            |              |
| Breast cancer                       | Female | Socio-demographic Index                             |              |              | X            |              |              | X            |
| Breast cancer                       | Male   | fruits adjusted(g)                                  |              | X            |              |              | X            |              |
| Breast cancer                       | Female | Mean BMI                                            | X            |              |              | X            |              |              |
| Breast cancer                       | Male   | Socio-demographic Index                             |              |              | X            |              |              | X            |
| Breast cancer                       | Male   | Education (years per capita)                        |              | X            |              |              |              | X            |
| Breast cancer                       | Female | Education (years per capita)                        |              | X            |              |              |              | X            |
| Breast cancer                       | Male   | LDI (5 per capita)                                  |              |              | X            |              |              | X            |
| Breast cancer                       | Female | Alcohol (liters per capita)                         | X            |              |              | X            |              |              |
| Breast cancer                       | Male   | Healthcare access and quality index                 |              | X            |              |              | X            |              |
| Breast cancer                       | Female | Healthcare access and quality index                 |              | X            |              |              | X            |              |
| Breast cancer                       | Female | LDI (5 per capita)                                  |              |              | X            |              |              | X            |
| Breast cancer                       | Male   | Mean BMI                                            | X            |              |              | X            |              |              |
| Cervical cancer                     | Female | fruits adjusted(g)                                  |              |              |              |              | X            |              |
| Cervical cancer                     | Female | Smoking Prevalence                                  |              | X            |              |              | X            |              |
| Cervical cancer                     | Female | Cumulative Cigarettes (5 Years)                     | X            |              |              | X            |              |              |
| Cervical cancer                     | Female | Total Fertility Rate                                |              | X            |              |              | X            |              |
| Cervical cancer                     | Female | Total Fertility Rate                                |              | X            |              |              | X            |              |
| Cervical cancer                     | Female | Cumulative Cigarettes (15 Years)                    | X            |              |              | X            |              |              |
| Cervical cancer                     | Female | Age-Specific Fertility Rate                         |              | X            |              |              | X            |              |
| Cervical cancer                     | Female | Age-Specific Fertility Rate                         |              | X            |              |              | X            |              |
| Cervical cancer                     | Female | HIV age-standardized prevalence                     | X            |              |              | X            |              |              |
| Cervical cancer                     | Female | HIV age-standardized prevalence                     | X            |              |              | X            |              |              |
| Cervical cancer                     | Female | vegetables adjusted(g)                              |              | X            |              |              | X            |              |
| Cervical cancer                     | Female | Cumulative Cigarettes (10 Years)                    | X            |              |              | X            |              |              |
| Cervical cancer                     | Female | Education (years per capita)                        |              |              | X            |              |              | X            |
| Cervical cancer                     | Female | LDI (5 per capita)                                  |              |              | X            |              |              | X            |
| Cervical cancer                     | Female | Healthcare access and quality index                 |              | X            |              |              | X            |              |
| Cervical cancer                     | Female | Socio-demographic Index                             |              |              | X            |              |              | X            |
| Cervical cancer                     | Female | Socio-demographic Index                             |              |              | X            |              |              | X            |
| Uterine cancer                      | Female | Log-transformed SEV scalar: Uterus C                | X            |              |              | X            |              |              |
| Uterine cancer                      | Female | Tobacco (cigarettes per capita)                     |              | X            |              |              | X            |              |
| Uterine cancer                      | Female | Tobacco (cigarettes per capita)                     |              | X            |              |              | X            |              |
| Uterine cancer                      | Female | Total Fertility Rate                                |              | X            |              |              | X            |              |
| Uterine cancer                      | Female | Total Fertility Rate                                |              | X            |              |              | X            |              |
| Uterine cancer                      | Female | Cumulative Cigarettes (5 Years)                     |              | X            |              |              | X            |              |
| Uterine cancer                      | Female | Smoking Prevalence                                  |              | X            |              |              | X            |              |
| Uterine cancer                      | Female | Cumulative Cigarettes (10 Years)                    |              | X            |              |              | X            |              |
| Uterine cancer                      | Female | Education (years per capita)                        |              |              | X            |              |              | X            |
| Uterine cancer                      | Female | fruits adjusted(g)                                  |              | X            |              |              | X            |              |
| Uterine cancer                      | Female | Healthcare access and quality index                 |              | X            |              |              | X            |              |
| Uterine cancer                      | Female | Diabetes Age-Standardized Prevalence (proportion)   |              | X            |              |              | X            |              |
| Uterine cancer                      | Female | Mean BMI                                            | X            |              |              | X            |              |              |
| Uterine cancer                      | Female | vegetables adjusted(g)                              |              | X            |              |              | X            |              |
| Uterine cancer                      | Female | LDI (5 per capita)                                  |              |              | X            |              |              | X            |
| Prostate cancer                     | Male   | Education (years per capita)                        |              |              | X            |              |              | X            |
| Prostate cancer                     | Male   | LDI (5 per capita)                                  |              |              | X            |              |              | X            |
| Prostate cancer                     | Male   | Healthcare access and quality index                 |              | X            |              |              | X            |              |
| Prostate cancer                     | Male   | Socio-demographic Index                             |              |              | X            |              |              | X            |
| Prostate cancer                     | Male   | Log-transformed SEV scalar: Prostate C              | X            |              |              | X            |              |              |
| Colon and rectum cancer             | Male   | fruits adjusted(g)                                  |              | X            |              |              | X            |              |
| Colon and rectum cancer             | Female | Log-transformed SEV scalar: Colorect C              | X            |              |              | X            |              |              |

Appendix Table 10: Comparison of GBD 2016 and GBD 2017 covariates and level of covariates used in cause of death modeling

| Cause                                | Sex    | Covariate                                           | Level 1 2017 | Level 2 2017 | Level 3 2017 | Level 1 2016 | Level 2 2016 | Level 3 2016 |
|--------------------------------------|--------|-----------------------------------------------------|--------------|--------------|--------------|--------------|--------------|--------------|
| Colon and rectum cancer              | Male   | Alcohol (liters per capita)                         | X            |              |              | X            |              |              |
| Colon and rectum cancer              | Female | Alcohol (liters per capita)                         | X            |              |              | X            |              |              |
| Colon and rectum cancer              | Male   | Education (years per capita)                        |              |              | X            |              |              | X            |
| Colon and rectum cancer              | Female | Education (years per capita)                        |              |              | X            |              |              | X            |
| Colon and rectum cancer              | Male   | LDI (IS per capita)                                 |              |              | X            |              |              | X            |
| Colon and rectum cancer              | Female | LDI (IS per capita)                                 |              |              | X            |              |              | X            |
| Colon and rectum cancer              | Male   | Healthcare access and quality index                 |              | X            |              |              | X            |              |
| Colon and rectum cancer              | Female | Healthcare access and quality index                 |              | X            |              |              | X            |              |
| Colon and rectum cancer              | Male   | Mean BMI                                            | X            |              |              | X            |              |              |
| Colon and rectum cancer              | Female | Mean BMI                                            | X            |              |              | X            |              |              |
| Colon and rectum cancer              | Male   | Socio-demographic Index                             |              |              | X            |              |              | X            |
| Colon and rectum cancer              | Female | Socio-demographic Index                             |              |              | X            |              |              | X            |
| Colon and rectum cancer              | Male   | red meats adjusted(g)                               | X            |              |              | X            |              |              |
| Colon and rectum cancer              | Female | red meats adjusted(g)                               | X            |              |              | X            |              |              |
| Colon and rectum cancer              | Male   | Smoking Prevalence                                  | X            |              |              | X            |              |              |
| Colon and rectum cancer              | Female | Smoking Prevalence                                  | X            |              |              | X            |              |              |
| Colon and rectum cancer              | Male   | fruits adjusted(g)                                  |              | X            |              |              | X            |              |
| Colon and rectum cancer              | Female | fruits adjusted(g)                                  | X            |              |              |              | X            |              |
| Colon and rectum cancer              | Female | fruits adjusted(g)                                  |              | X            |              |              | X            |              |
| Colon and rectum cancer              | Male   | nut seeds adjusted(g)                               |              | X            |              |              | X            |              |
| Colon and rectum cancer              | Female | nut seeds adjusted(g)                               |              | X            |              |              | X            |              |
| Colon and rectum cancer              | Male   | pufa adjusted(percent)                              |              | X            |              |              | X            |              |
| Colon and rectum cancer              | Female | pufa adjusted(percent)                              |              | X            |              |              | X            |              |
| Colon and rectum cancer              | Male   | vegetables adjusted(g)                              |              | X            |              |              | X            |              |
| Colon and rectum cancer              | Female | vegetables adjusted(g)                              | X            |              |              |              | X            |              |
| Colon and rectum cancer              | Female | vegetables adjusted(g)                              |              | X            |              |              | X            |              |
| Colon and rectum cancer              | Male   | Tobacco (cigarettes per capita)                     | X            |              |              | X            |              |              |
| Colon and rectum cancer              | Male   | Log-transformed SEV scalar: Colorect C              | X            |              |              | X            |              |              |
| Colon and rectum cancer              | Female | milk adjusted(g)                                    |              | X            |              |              | X            |              |
| Colon and rectum cancer              | Female | Tobacco (cigarettes per capita)                     |              | X            |              | X            |              |              |
| Colon and rectum cancer              | Female | Education (years per capita)                        |              |              | X            |              |              | X            |
| Lip and oral cavity cancer           | Male   | Cumulative Cigarettes (20 Years)                    | X            |              |              | X            |              |              |
| Lip and oral cavity cancer           | Female | Cumulative Cigarettes (20 Years)                    | X            |              |              | X            |              |              |
| Lip and oral cavity cancer           | Male   | Alcohol (liters per capita)                         | X            |              |              | X            |              |              |
| Lip and oral cavity cancer           | Female | Alcohol (liters per capita)                         | X            |              |              | X            |              |              |
| Lip and oral cavity cancer           | Male   | Education (years per capita)                        |              |              | X            |              |              | X            |
| Lip and oral cavity cancer           | Female | Education (years per capita)                        |              |              | X            |              |              | X            |
| Lip and oral cavity cancer           | Male   | LDI (IS per capita)                                 |              |              | X            |              |              | X            |
| Lip and oral cavity cancer           | Female | LDI (IS per capita)                                 |              |              | X            |              |              | X            |
| Lip and oral cavity cancer           | Male   | Healthcare access and quality index                 |              | X            |              |              | X            |              |
| Lip and oral cavity cancer           | Female | Healthcare access and quality index                 |              | X            |              |              | X            |              |
| Lip and oral cavity cancer           | Female | Health System Access 2 (unitless)                   |              | X            |              |              | X            |              |
| Lip and oral cavity cancer           | Male   | Socio-demographic Index                             |              |              | X            |              |              | X            |
| Lip and oral cavity cancer           | Male   | Tobacco (cigarettes per capita)                     | X            |              |              | X            |              |              |
| Lip and oral cavity cancer           | Male   | red meats adjusted(g)                               |              | X            |              |              | X            |              |
| Lip and oral cavity cancer           | Female | Socio-demographic Index                             |              |              | X            |              |              | X            |
| Lip and oral cavity cancer           | Male   | Log-transformed SEV scalar: Mouth C                 | X            |              |              | X            |              |              |
| Lip and oral cavity cancer           | Male   | Cumulative Cigarettes (5 Years)                     | X            |              |              | X            |              |              |
| Lip and oral cavity cancer           | Female | Cumulative Cigarettes (10 Years)                    | X            |              |              | X            |              |              |
| Lip and oral cavity cancer           | Male   | Cumulative Cigarettes (15 Years)                    | X            |              |              | X            |              |              |
| Lip and oral cavity cancer           | Male   | vegetables adjusted(g)                              |              | X            |              | X            |              |              |
| Lip and oral cavity cancer           | Male   | fruits adjusted(g)                                  |              | X            |              | X            |              |              |
| Lip and oral cavity cancer           | Female | Smoking Prevalence                                  | X            |              |              | X            |              |              |
| Lip and oral cavity cancer           | Male   | Smoking Prevalence                                  | X            |              |              | X            |              |              |
| Lip and oral cavity cancer           | Male   | Cumulative Cigarettes (10 Years)                    | X            |              |              | X            |              |              |
| Nasopharynx cancer                   | Male   | vegetables adjusted(g)                              |              | X            |              |              | X            |              |
| Nasopharynx cancer                   | Female | Population Density (under 150 ppl/sqkm, proportion) |              | X            |              |              | X            |              |
| Nasopharynx cancer                   | Male   | Population Density (under 150 ppl/sqkm, proportion) |              | X            |              |              | X            |              |
| Nasopharynx cancer                   | Female | Socio-demographic Index                             |              |              | X            |              |              | X            |
| Nasopharynx cancer                   | Male   | Socio-demographic Index                             |              |              | X            |              |              | X            |
| Nasopharynx cancer                   | Female | Smoking Prevalence                                  | X            |              |              | X            |              |              |
| Nasopharynx cancer                   | Male   | Smoking Prevalence                                  | X            |              |              | X            |              |              |
| Nasopharynx cancer                   | Female | fruits adjusted(g)                                  |              | X            |              |              | X            |              |
| Nasopharynx cancer                   | Male   | fruits adjusted(g)                                  |              | X            |              |              | X            |              |
| Nasopharynx cancer                   | Female | vegetables adjusted(g)                              |              | X            |              |              | X            |              |
| Nasopharynx cancer                   | Female | Cumulative Cigarettes (10 Years)                    | X            |              |              | X            |              |              |
| Nasopharynx cancer                   | Male   | Tobacco (cigarettes per capita)                     | X            |              |              | X            |              |              |
| Nasopharynx cancer                   | Female | Cumulative Cigarettes (5 Years)                     | X            |              |              | X            |              |              |
| Nasopharynx cancer                   | Male   | Cumulative Cigarettes (5 Years)                     | X            |              |              | X            |              |              |
| Nasopharynx cancer                   | Female | Cumulative Cigarettes (5 Years)                     | X            |              |              | X            |              |              |
| Nasopharynx cancer                   | Female | Tobacco (cigarettes per capita)                     | X            |              |              | X            |              |              |
| Nasopharynx cancer                   | Female | Population Density (over 1000 ppl/sqkm, proportion) |              | X            |              |              | X            |              |
| Nasopharynx cancer                   | Female | Cumulative Cigarettes (15 Years)                    | X            |              |              | X            |              |              |
| Nasopharynx cancer                   | Male   | Cumulative Cigarettes (15 Years)                    | X            |              |              | X            |              |              |
| Nasopharynx cancer                   | Female | Cumulative Cigarettes (20 Years)                    | X            |              |              | X            |              |              |
| Nasopharynx cancer                   | Male   | Cumulative Cigarettes (20 Years)                    | X            |              |              | X            |              |              |
| Nasopharynx cancer                   | Female | Log-transformed SEV scalar: Nasoph C                | X            |              |              | X            |              |              |
| Nasopharynx cancer                   | Male   | Log-transformed SEV scalar: Nasoph C                | X            |              |              | X            |              |              |
| Nasopharynx cancer                   | Male   | Cumulative Cigarettes (10 Years)                    | X            |              |              | X            |              |              |
| Nasopharynx cancer                   | Male   | LDI (IS per capita)                                 |              | X            |              |              | X            |              |
| Nasopharynx cancer                   | Male   | Population Density (over 1000 ppl/sqkm, proportion) |              | X            |              |              | X            |              |
| Nasopharynx cancer                   | Male   | Education (years per capita)                        |              |              | X            |              |              | X            |
| Nasopharynx cancer                   | Female | Education (years per capita)                        |              |              | X            |              |              | X            |
| Nasopharynx cancer                   | Male   | LDI (IS per capita)                                 |              |              | X            |              |              | X            |
| Nasopharynx cancer                   | Male   | Alcohol (liters per capita)                         | X            |              |              | X            |              |              |
| Nasopharynx cancer                   | Female | Alcohol (liters per capita)                         | X            |              |              | X            |              |              |
| Other pharynx cancer                 | Male   | vegetables adjusted(g)                              |              | X            |              |              | X            |              |
| Other pharynx cancer                 | Female | vegetables adjusted(g)                              |              | X            |              |              | X            |              |
| Other pharynx cancer                 | Male   | Cumulative Cigarettes (5 Years)                     | X            |              |              | X            |              |              |
| Other pharynx cancer                 | Female | Cumulative Cigarettes (5 Years)                     | X            |              |              | X            |              |              |
| Other pharynx cancer                 | Female | Alcohol (liters per capita)                         | X            |              |              | X            |              |              |
| Other pharynx cancer                 | Male   | fruits adjusted(g)                                  |              | X            |              |              | X            |              |
| Other pharynx cancer                 | Male   | Education (years per capita)                        |              |              | X            |              |              | X            |
| Other pharynx cancer                 | Female | Education (years per capita)                        |              |              | X            |              |              | X            |
| Other pharynx cancer                 | Male   | Log-transformed SEV scalar: Oth Phar C              | X            |              |              | X            |              |              |
| Other pharynx cancer                 | Female | Log-transformed SEV scalar: Oth Phar C              | X            |              |              | X            |              |              |
| Other pharynx cancer                 | Male   | Alcohol (liters per capita)                         | X            |              |              | X            |              |              |
| Other pharynx cancer                 | Female | Alcohol (liters per capita)                         | X            |              |              | X            |              |              |
| Other pharynx cancer                 | Female | Smoking Prevalence                                  | X            |              |              | X            |              |              |
| Other pharynx cancer                 | Female | fruits adjusted(g)                                  |              | X            |              |              | X            |              |
| Other pharynx cancer                 | Female | Socio-demographic Index                             |              |              | X            |              |              | X            |
| Other pharynx cancer                 | Male   | Socio-demographic Index                             |              |              | X            |              |              | X            |
| Other pharynx cancer                 | Female | Population Density (under 150 ppl/sqkm, proportion) |              | X            |              |              | X            |              |
| Other pharynx cancer                 | Male   | Population Density (under 150 ppl/sqkm, proportion) |              | X            |              |              | X            |              |
| Other pharynx cancer                 | Female | Population Density (over 1000 ppl/sqkm, proportion) |              | X            |              |              | X            |              |
| Other pharynx cancer                 | Male   | Population Density (over 1000 ppl/sqkm, proportion) |              | X            |              |              | X            |              |
| Other pharynx cancer                 | Female | LDI (IS per capita)                                 |              |              | X            |              |              | X            |
| Other pharynx cancer                 | Male   | LDI (IS per capita)                                 |              |              | X            |              |              | X            |
| Other pharynx cancer                 | Male   | Smoking Prevalence                                  | X            |              |              | X            |              |              |
| Gallbladder and biliary tract cancer | Female | Socio-demographic Index                             |              |              | X            |              |              | X            |
| Gallbladder and biliary tract cancer | Male   | Mean BMI                                            | X            |              |              | X            |              |              |
| Gallbladder and biliary tract cancer | Male   | Socio-demographic Index                             |              |              | X            |              |              | X            |
| Gallbladder and biliary tract cancer | Female | Mean BMI                                            | X            |              |              | X            |              |              |
| Gallbladder and biliary tract cancer | Male   | Diabetes Age-Standardized Prevalence (proportion)   |              | X            |              |              | X            |              |
| Gallbladder and biliary tract cancer | Female | Diabetes Age-Standardized Prevalence (proportion)   |              | X            |              |              | X            |              |
| Gallbladder and biliary tract cancer | Female | LDI (IS per capita)                                 |              |              | X            |              |              | X            |
| Gallbladder and biliary tract cancer | Female | Healthcare access and quality index                 |              | X            |              |              | X            |              |
| Gallbladder and biliary tract cancer | Male   | Education (years per capita)                        |              |              | X            |              |              | X            |
| Gallbladder and biliary tract cancer | Male   | LDI (IS per capita)                                 |              |              | X            |              |              | X            |
| Gallbladder and biliary tract cancer | Female | Education (years per capita)                        |              |              | X            |              |              | X            |
| Gallbladder and biliary tract cancer | Male   | Alcohol (liters per capita)                         | X            |              |              |              | X            |              |
| Gallbladder and biliary tract cancer | Female | Alcohol (liters per capita)                         | X            |              |              |              | X            |              |
| Gallbladder and biliary tract cancer | Male   | Healthcare access and quality index                 |              | X            |              |              | X            |              |
| Gallbladder and biliary tract cancer | Female | Smoking Prevalence                                  | X            |              |              | X            |              |              |
| Gallbladder and biliary tract cancer | Male   | vegetables adjusted(g)                              |              | X            |              |              | X            |              |
| Gallbladder and biliary tract cancer | Female | fruits adjusted(g)                                  |              | X            |              |              | X            |              |

Appendix Table 10: Comparison of GBD 2016 and GBD 2017 covariates and level of covariates used in cause of death modeling

| Cause                                | Sex    | Covariate                                         | Level 1 2017 | Level 2 2017 | Level 3 2017 | Level 1 2016 | Level 2 2016 | Level 3 2016 |
|--------------------------------------|--------|---------------------------------------------------|--------------|--------------|--------------|--------------|--------------|--------------|
| Gallbladder and biliary tract cancer | Male   | Smoking Prevalence                                |              | X            |              |              | X            |              |
| Gallbladder and biliary tract cancer | Male   | Log-transformed SEV scalar: Gallblad C            | X            |              |              | X            |              |              |
| Gallbladder and biliary tract cancer | Female | Log-transformed SEV scalar: Gallblad C            | X            |              |              | X            |              |              |
| Gallbladder and biliary tract cancer | Female | Tobacco (cigarettes per capita)                   |              | X            |              |              | X            |              |
| Gallbladder and biliary tract cancer | Male   | Cumulative Cigarettes (5 Years)                   |              | X            |              |              | X            |              |
| Gallbladder and biliary tract cancer | Male   | Tobacco (cigarettes per capita)                   |              | X            |              |              | X            |              |
| Gallbladder and biliary tract cancer | Male   | Cumulative Cigarettes (10 Years)                  |              | X            |              |              | X            |              |
| Gallbladder and biliary tract cancer | Female | Cumulative Cigarettes (10 Years)                  |              | X            |              |              | X            |              |
| Gallbladder and biliary tract cancer | Female | vegetables adjusted(g)                            |              | X            |              |              | X            |              |
| Gallbladder and biliary tract cancer | Male   | fruits adjusted(g)                                |              | X            |              |              | X            |              |
| Gallbladder and biliary tract cancer | Female | Cumulative Cigarettes (5 Years)                   |              | X            |              |              | X            |              |
| Pancreatic cancer                    | Female | Smoking Prevalence                                | X            |              |              | X            |              |              |
| Pancreatic cancer                    | Male   | Smoking Prevalence                                | X            |              |              | X            |              |              |
| Pancreatic cancer                    | Male   | energy unadjusted(kcal)                           |              | X            |              |              | X            |              |
| Pancreatic cancer                    | Female | energy unadjusted(kcal)                           |              | X            |              |              | X            |              |
| Pancreatic cancer                    | Female | red meats adjusted(g)                             |              | X            |              |              | X            |              |
| Pancreatic cancer                    | Female | Socio-demographic Index                           |              |              | X            |              |              | X            |
| Pancreatic cancer                    | Male   | Socio-demographic Index                           |              |              | X            |              |              | X            |
| Pancreatic cancer                    | Female | Mean BMI                                          | X            |              |              | X            |              |              |
| Pancreatic cancer                    | Male   | Mean BMI                                          | X            |              |              | X            |              |              |
| Pancreatic cancer                    | Female | Diabetes Age-Standardized Prevalence (proportion) |              | X            |              |              | X            |              |
| Pancreatic cancer                    | Male   | (red meats adjusted(g)                            |              | X            |              |              | X            |              |
| Pancreatic cancer                    | Male   | fruits adjusted(g)                                |              | X            |              |              | X            |              |
| Pancreatic cancer                    | Male   | vegetables adjusted(g)                            |              | X            |              |              | X            |              |
| Pancreatic cancer                    | Female | vegetables adjusted(g)                            |              | X            |              |              | X            |              |
| Pancreatic cancer                    | Female | vegetables adjusted(g)                            | X            |              |              |              | X            |              |
| Pancreatic cancer                    | Male   | Cumulative Cigarettes (10 Years)                  | X            |              |              | X            |              |              |
| Pancreatic cancer                    | Female | Cumulative Cigarettes (10 Years)                  | X            |              |              | X            |              |              |
| Pancreatic cancer                    | Male   | Cumulative Cigarettes (5 Years)                   |              | X            |              |              | X            |              |
| Pancreatic cancer                    | Female | Cumulative Cigarettes (5 Years)                   |              | X            |              |              | X            |              |
| Pancreatic cancer                    | Male   | Tobacco (cigarettes per capita)                   | X            |              |              | X            |              |              |
| Pancreatic cancer                    | Female | Tobacco (cigarettes per capita)                   | X            |              |              | X            |              |              |
| Pancreatic cancer                    | Male   | Cumulative Cigarettes (20 Years)                  | X            |              |              | X            |              |              |
| Pancreatic cancer                    | Female | Cumulative Cigarettes (20 Years)                  | X            |              |              | X            |              |              |
| Pancreatic cancer                    | Male   | Log-transformed SEV scalar: Pancreas C            | X            |              |              | X            |              |              |
| Pancreatic cancer                    | Female | Log-transformed SEV scalar: Pancreas C            | X            |              |              | X            |              |              |
| Pancreatic cancer                    | Female | fruits adjusted(g)                                |              | X            |              |              | X            |              |
| Pancreatic cancer                    | Male   | Diabetes Age-Standardized Prevalence (proportion) |              | X            |              |              | X            |              |
| Pancreatic cancer                    | Female | LDH (IS per capita)                               |              |              | X            |              |              | X            |
| Pancreatic cancer                    | Male   | Healthcare access and quality index               |              | X            |              |              | X            |              |
| Pancreatic cancer                    | Female | Healthcare access and quality index               |              | X            |              |              | X            |              |
| Pancreatic cancer                    | Male   | Alcohol (liters per capita)                       | X            |              |              | X            |              |              |
| Pancreatic cancer                    | Male   | Education (years per capita)                      |              |              | X            |              |              | X            |
| Pancreatic cancer                    | Female | Education (years per capita)                      |              |              | X            |              |              | X            |
| Pancreatic cancer                    | Male   | LDH (IS per capita)                               |              |              | X            |              |              | X            |
| Pancreatic cancer                    | Female | Alcohol (liters per capita)                       |              | X            |              | X            |              |              |
| Malignant skin melanoma              | Male   | Alcohol (liters per capita)                       |              | X            |              | X            |              |              |
| Malignant skin melanoma              | Male   | Alcohol (liters per capita)                       | X            |              |              | X            |              |              |
| Malignant skin melanoma              | Female | Alcohol (liters per capita)                       | X            |              |              | X            |              |              |
| Malignant skin melanoma              | Male   | Education (years per capita)                      |              |              | X            |              |              | X            |
| Malignant skin melanoma              | Female | Education (years per capita)                      |              |              | X            |              |              | X            |
| Malignant skin melanoma              | Male   | LDH (IS per capita)                               |              |              | X            |              |              | X            |
| Malignant skin melanoma              | Female | LDH (IS per capita)                               |              |              | X            |              |              | X            |
| Malignant skin melanoma              | Male   | Healthcare access and quality index               |              | X            |              |              | X            |              |
| Malignant skin melanoma              | Female | Healthcare access and quality index               |              | X            |              |              | X            |              |
| Malignant skin melanoma              | Male   | Socio-demographic Index                           |              |              | X            |              |              | X            |
| Malignant skin melanoma              | Female | Socio-demographic Index                           |              |              | X            |              |              | X            |
| Malignant skin melanoma              | Male   | vegetables adjusted(g)                            |              | X            |              |              | X            |              |
| Malignant skin melanoma              | Female | vegetables adjusted(g)                            |              | X            |              |              | X            |              |
| Malignant skin melanoma              | Male   | Latitude 15 to 30 (proportion)                    |              | X            |              |              | X            |              |
| Malignant skin melanoma              | Female | Latitude 15 to 30 (proportion)                    |              | X            |              |              | X            |              |
| Malignant skin melanoma              | Male   | Latitude 30 to 45 (proportion)                    |              | X            |              |              | X            |              |
| Malignant skin melanoma              | Female | Latitude 30 to 45 (proportion)                    |              | X            |              |              | X            |              |
| Malignant skin melanoma              | Male   | Latitude Over 45 (proportion)                     |              | X            |              |              | X            |              |
| Malignant skin melanoma              | Female | Latitude Over 45 (proportion)                     |              | X            |              |              | X            |              |
| Malignant skin melanoma              | Male   | Latitude Under 15 (proportion)                    |              | X            |              |              | X            |              |
| Malignant skin melanoma              | Female | Latitude Under 15 (proportion)                    |              | X            |              |              | X            |              |
| Malignant skin melanoma              | Male   | fruits adjusted(g)                                |              | X            |              |              | X            |              |
| Malignant skin melanoma              | Female | fruits adjusted(g)                                |              | X            |              |              | X            |              |
| Malignant skin melanoma              | Male   | Latitude 30 to 45 (proportion)                    |              | X            |              |              | X            |              |
| Non-melanoma skin cancer             | Male   | Healthcare access and quality index               |              | X            |              |              | X            |              |
| Non-melanoma skin cancer             | Male   | Education (years per capita)                      |              |              | X            |              |              | X            |
| Non-melanoma skin cancer             | Female | Education (years per capita)                      |              |              | X            |              |              | X            |
| Non-melanoma skin cancer             | Male   | LDH (IS per capita)                               |              |              | X            |              |              | X            |
| Non-melanoma skin cancer             | Female | LDH (IS per capita)                               |              |              | X            |              |              | X            |
| Non-melanoma skin cancer             | Female | Healthcare access and quality index               |              | X            |              |              | X            |              |
| Non-melanoma skin cancer             | Male   | Socio-demographic Index                           |              |              | X            |              |              | X            |
| Non-melanoma skin cancer             | Female | Socio-demographic Index                           |              |              | X            |              |              | X            |
| Non-melanoma skin cancer             | Male   | Smoking Prevalence                                | X            |              |              | X            |              |              |
| Non-melanoma skin cancer             | Female | Smoking Prevalence                                | X            |              |              | X            |              |              |
| Non-melanoma skin cancer             | Male   | Cumulative Cigarettes (10 Years)                  | X            |              |              | X            |              |              |
| Non-melanoma skin cancer             | Female | Cumulative Cigarettes (10 Years)                  | X            |              |              | X            |              |              |
| Non-melanoma skin cancer             | Male   | Cumulative Cigarettes (5 Years)                   | X            |              |              | X            |              |              |
| Non-melanoma skin cancer             | Female | Cumulative Cigarettes (5 Years)                   | X            |              |              | X            |              |              |
| Non-melanoma skin cancer             | Male   | Cumulative Cigarettes (15 Years)                  | X            |              |              | X            |              |              |
| Non-melanoma skin cancer             | Female | Cumulative Cigarettes (15 Years)                  | X            |              |              | X            |              |              |
| Non-melanoma skin cancer             | Male   | Average latitude                                  |              | X            |              |              | X            |              |
| Non-melanoma skin cancer             | Female | Average latitude                                  |              | X            |              |              | X            |              |
| Non-melanoma skin cancer             | Female | Cumulative Cigarettes (5 Years)                   | X            |              |              | X            |              |              |
| Ovarian cancer                       | Female | Smoking Prevalence                                |              | X            |              |              | X            |              |
| Ovarian cancer                       | Female | Mean BMI                                          |              | X            |              |              | X            |              |
| Ovarian cancer                       | Female | Diabetes Age-Standardized Prevalence (proportion) |              | X            |              |              | X            |              |
| Ovarian cancer                       | Female | Healthcare access and quality index               |              | X            |              |              | X            |              |
| Ovarian cancer                       | Female | Log-transformed SEV scalar: Ovary C               | X            |              |              | X            |              |              |
| Ovarian cancer                       | Female | LDH (IS per capita)                               |              |              | X            |              |              | X            |
| Ovarian cancer                       | Female | Education (years per capita)                      |              |              | X            |              |              | X            |
| Ovarian cancer                       | Female | Alcohol (liters per capita)                       | X            |              |              | X            |              |              |
| Ovarian cancer                       | Female | Socio-demographic Index                           |              |              | X            |              |              | X            |
| Ovarian cancer                       | Female | Contraception (Modern) Prevalence (proportion)    | X            |              |              | X            |              |              |
| Ovarian cancer                       | Female | Cumulative Cigarettes (20 Years)                  | X            |              |              | X            |              |              |
| Ovarian cancer                       | Female | energy unadjusted(kcal)                           |              | X            |              |              | X            |              |
| Ovarian cancer                       | Female | Total Fertility Rate                              |              | X            |              |              | X            |              |
| Ovarian cancer                       | Female | vegetables adjusted(g)                            |              | X            |              |              | X            |              |
| Ovarian cancer                       | Female | fruits adjusted(g)                                |              | X            |              |              | X            |              |
| Ovarian cancer                       | Female | Tobacco (cigarettes per capita)                   | X            |              |              | X            |              |              |
| Ovarian cancer                       | Male   | Education (years per capita)                      |              |              | X            |              |              | X            |
| Ovarian cancer                       | Male   | LDH (IS per capita)                               |              |              | X            |              |              | X            |
| Ovarian cancer                       | Male   | LDH (IS per capita)                               |              |              | X            |              |              | X            |
| Ovarian cancer                       | Female | Diabetes Age-Standardized Prevalence (proportion) |              | X            |              |              | X            |              |
| Ovarian cancer                       | Female | Diabetes Age-Standardized Prevalence (proportion) |              | X            |              |              | X            |              |
| Ovarian cancer                       | Female | Mean BMI                                          | X            |              |              | X            |              |              |
| Ovarian cancer                       | Male   | Socio-demographic Index                           |              |              | X            |              |              | X            |
| Ovarian cancer                       | Female | Socio-demographic Index                           |              |              | X            |              |              | X            |
| Ovarian cancer                       | Male   | Systolic Blood Pressure (mmHg)                    |              | X            |              |              | X            |              |
| Ovarian cancer                       | Female | Systolic Blood Pressure (mmHg)                    |              | X            |              |              | X            |              |

Appendix Table 10: Comparison of GBD 2016 and GBD 2017 covariates and level of covariates used in cause of death modeling

| Cause                           | Sex    | Covariate                                              | Level 1 2017 | Level 2 2017 | Level 3 2017 | Level 1 2016 | Level 2 2016 | Level 3 2016 |
|---------------------------------|--------|--------------------------------------------------------|--------------|--------------|--------------|--------------|--------------|--------------|
| Kidney cancer                   | Male   | Smoking Prevalence                                     |              | X            |              |              | X            |              |
| Kidney cancer                   | Female | Smoking Prevalence                                     |              | X            |              |              | X            |              |
| Kidney cancer                   | Male   | Alcohol (liters per capita)                            |              | X            |              |              | X            |              |
| Kidney cancer                   | Female | Cumulative Cigarettes (10 Years)                       | X            |              |              | X            |              |              |
| Kidney cancer                   | Male   | Cumulative Cigarettes (5 Years)                        | X            |              |              | X            |              |              |
| Kidney cancer                   | Male   | Cumulative Cigarettes (15 Years)                       | X            |              |              | X            |              |              |
| Kidney cancer                   | Male   | Mean BMI                                               | X            |              |              | X            |              |              |
| Kidney cancer                   | Female | Alcohol (liters per capita)                            |              | X            |              |              | X            |              |
| Kidney cancer                   | Male   | Education (years per capita)                           |              | X            | X            |              |              | X            |
| Bladder cancer                  | Female | Alcohol (liters per capita)                            |              | X            |              |              | X            |              |
| Bladder cancer                  | Female | Cumulative Cigarettes (10 Years)                       | X            |              |              | X            |              |              |
| Bladder cancer                  | Male   | Cumulative Cigarettes (5 Years)                        | X            |              |              | X            |              |              |
| Bladder cancer                  | Female | Cumulative Cigarettes (5 Years)                        | X            |              |              | X            |              |              |
| Bladder cancer                  | Male   | Cumulative Cigarettes (15 Years)                       | X            |              |              | X            |              |              |
| Bladder cancer                  | Female | Cumulative Cigarettes (15 Years)                       | X            |              |              | X            |              |              |
| Bladder cancer                  | Male   | Log-transformed SEV scalar: Bladder C                  | X            |              |              | X            |              |              |
| Bladder cancer                  | Female | Log-transformed SEV scalar: Bladder C                  | X            |              |              | X            |              |              |
| Bladder cancer                  | Male   | vegetables adjusted(g)                                 |              | X            |              |              | X            |              |
| Bladder cancer                  | Female | fruits adjusted(g)                                     |              | X            |              |              | X            |              |
| Bladder cancer                  | Male   | fruits adjusted(g)                                     |              | X            |              |              | X            |              |
| Bladder cancer                  | Female | Smoking Prevalence                                     | X            |              |              | X            |              |              |
| Bladder cancer                  | Male   | Smoking Prevalence                                     | X            |              |              | X            |              |              |
| Bladder cancer                  | Female | Socio-demographic Index                                |              |              | X            |              |              | X            |
| Bladder cancer                  | Male   | Socio-demographic Index                                |              |              | X            |              |              | X            |
| Bladder cancer                  | Female | Healthcare access and quality index                    |              | X            |              |              | X            |              |
| Bladder cancer                  | Male   | Healthcare access and quality index                    |              | X            |              |              | X            |              |
| Bladder cancer                  | Female | LDI (5 per capita)                                     |              |              | X            |              |              | X            |
| Bladder cancer                  | Female | Education (years per capita)                           |              |              | X            |              |              | X            |
| Bladder cancer                  | Male   | Education (years per capita)                           |              |              | X            |              |              | X            |
| Bladder cancer                  | Male   | Alcohol (liters per capita)                            |              | X            |              |              | X            |              |
| Bladder cancer                  | Male   | LDI (5 per capita)                                     |              |              | X            |              |              | X            |
| Bladder cancer                  | Female | vegetables adjusted(g)                                 |              | X            |              |              | X            |              |
| Bladder cancer                  | Male   | Cumulative Cigarettes (10 Years)                       | X            |              |              | X            |              |              |
| Brain and nervous system cancer | Female | fruits adjusted(g)                                     |              | X            |              |              | X            |              |
| Brain and nervous system cancer | Male   | vegetables adjusted(g)                                 |              | X            |              |              | X            |              |
| Brain and nervous system cancer | Male   | fruits adjusted(g)                                     |              | X            |              |              | X            |              |
| Brain and nervous system cancer | Male   | Smoking Prevalence                                     | X            |              |              | X            |              |              |
| Brain and nervous system cancer | Female | Smoking Prevalence                                     | X            |              |              | X            |              |              |
| Brain and nervous system cancer | Male   | red meats adjusted(g)                                  |              | X            |              |              | X            |              |
| Brain and nervous system cancer | Female | red meats adjusted(g)                                  |              | X            |              |              | X            |              |
| Brain and nervous system cancer | Male   | Systolic Blood Pressure (mmHg)                         |              | X            |              |              | X            |              |
| Brain and nervous system cancer | Male   | Cholesterol (total, mean per capita)                   |              | X            |              |              | X            |              |
| Brain and nervous system cancer | Male   | vegetables adjusted(g)                                 |              | X            |              |              | X            |              |
| Brain and nervous system cancer | Female | Cholesterol (total, mean per capita)                   |              | X            |              |              | X            |              |
| Brain and nervous system cancer | Female | Socio-demographic Index                                |              |              | X            |              |              | X            |
| Brain and nervous system cancer | Male   | Healthcare access and quality index                    |              | X            |              |              | X            |              |
| Brain and nervous system cancer | Female | Healthcare access and quality index                    |              | X            |              |              | X            |              |
| Brain and nervous system cancer | Male   | LDI (5 per capita)                                     |              |              | X            |              |              | X            |
| Brain and nervous system cancer | Female | LDI (5 per capita)                                     |              |              | X            |              |              | X            |
| Brain and nervous system cancer | Male   | Education (years per capita)                           |              |              | X            |              |              | X            |
| Brain and nervous system cancer | Female | Education (years per capita)                           |              |              | X            |              |              | X            |
| Brain and nervous system cancer | Male   | Alcohol (liters per capita)                            | X            |              |              | X            |              |              |
| Brain and nervous system cancer | Female | Alcohol (liters per capita)                            | X            |              |              | X            |              |              |
| Brain and nervous system cancer | Male   | Socio-demographic Index                                |              |              | X            |              |              | X            |
| Brain and nervous system cancer | Female | Cumulative Cigarettes (10 Years)                       | X            |              |              | X            |              |              |
| Brain and nervous system cancer | Female | Systolic Blood Pressure (mmHg)                         |              | X            |              |              | X            |              |
| Brain and nervous system cancer | Female | Cumulative Cigarettes (15 Years)                       | X            |              |              | X            |              |              |
| Brain and nervous system cancer | Male   | Cumulative Cigarettes (15 Years)                       | X            |              |              | X            |              |              |
| Brain and nervous system cancer | Male   | Cumulative Cigarettes (10 Years)                       | X            |              |              | X            |              |              |
| Thyroid cancer                  | Male   | Tobacco (cigarettes per capita)                        |              | X            |              |              | X            |              |
| Thyroid cancer                  | Female | Tobacco (cigarettes per capita)                        |              | X            |              |              | X            |              |
| Thyroid cancer                  | Male   | Improved Water Source (proportion with access)         |              | X            |              |              | X            |              |
| Thyroid cancer                  | Female | Improved Water Source (proportion with access)         |              | X            |              |              | X            |              |
| Thyroid cancer                  | Male   | Sanitation (proportion with access)                    |              | X            |              |              | X            |              |
| Thyroid cancer                  | Female | Sanitation (proportion with access)                    |              | X            |              |              | X            |              |
| Thyroid cancer                  | Male   | vegetables adjusted(g)                                 |              | X            |              |              | X            |              |
| Thyroid cancer                  | Female | Education (years per capita)                           |              |              | X            |              |              | X            |
| Thyroid cancer                  | Male   | Education (years per capita)                           |              |              | X            |              |              | X            |
| Thyroid cancer                  | Female | LDI (5 per capita)                                     |              |              | X            |              |              | X            |
| Thyroid cancer                  | Male   | LDI (5 per capita)                                     |              |              | X            |              |              | X            |
| Thyroid cancer                  | Female | Healthcare access and quality index                    |              | X            |              |              | X            |              |
| Thyroid cancer                  | Male   | Healthcare access and quality index                    |              | X            |              |              | X            |              |
| Thyroid cancer                  | Female | Mean BMI                                               |              | X            |              |              | X            |              |
| Thyroid cancer                  | Female | Socio-demographic Index                                |              |              | X            |              |              | X            |
| Thyroid cancer                  | Male   | Socio-demographic Index                                |              |              | X            |              |              | X            |
| Thyroid cancer                  | Female | red meats adjusted(g)                                  |              | X            |              |              | X            |              |
| Thyroid cancer                  | Male   | red meats adjusted(g)                                  |              | X            |              |              | X            |              |
| Thyroid cancer                  | Female | vegetables adjusted(g)                                 |              | X            |              |              | X            |              |
| Thyroid cancer                  | Female | Smoking Prevalence                                     |              | X            |              |              | X            |              |
| Thyroid cancer                  | Male   | Smoking Prevalence                                     |              | X            |              |              | X            |              |
| Thyroid cancer                  | Male   | Smoking Prevalence                                     |              | X            |              |              | X            |              |
| Thyroid cancer                  | Male   | Smoking Prevalence                                     | X            |              |              | X            |              |              |
| Thyroid cancer                  | Male   | Smoking Prevalence                                     | X            |              |              | X            |              |              |
| Thyroid cancer                  | Female | fruits adjusted(g)                                     |              | X            |              |              | X            |              |
| Thyroid cancer                  | Male   | fruits adjusted(g)                                     |              | X            |              |              | X            |              |
| Thyroid cancer                  | Male   | Mean BMI                                               |              | X            |              |              | X            |              |
| Thyroid cancer                  | Male   | Alcohol (liters per capita)                            | X            |              |              | X            |              |              |
| Thyroid cancer                  | Female | Alcohol (liters per capita)                            | X            |              |              | X            |              |              |
| Thyroid cancer                  | Male   | Log-transformed SEV scalar: Thyroid C                  | X            |              |              | X            |              |              |
| Thyroid cancer                  | Female | Log-transformed SEV scalar: Thyroid C                  | X            |              |              | X            |              |              |
| Mesothelioma                    | Female | Asbestos consumption (metric tons per year per capita) | X            |              |              | X            |              |              |
| Mesothelioma                    | Female | Healthcare access and quality index                    |              | X            |              |              | X            |              |
| Mesothelioma                    | Male   | Healthcare access and quality index                    |              | X            |              |              | X            |              |
| Mesothelioma                    | Female | Socio-demographic Index                                |              |              | X            |              |              | X            |
| Mesothelioma                    | Male   | Socio-demographic Index                                |              |              | X            |              |              | X            |
| Mesothelioma                    | Female | Indoor Air Pollution (All Cooking Fuels)               | X            |              |              | X            |              |              |
| Mesothelioma                    | Male   | Indoor Air Pollution (All Cooking Fuels)               | X            |              |              | X            |              |              |
| Mesothelioma                    | Male   | LDI (5 per capita)                                     |              |              | X            |              |              | X            |
| Mesothelioma                    | Male   | Asbestos consumption (metric tons per year per capita) | X            |              |              | X            |              |              |
| Mesothelioma                    | Female | LDI (5 per capita)                                     |              |              | X            |              |              | X            |
| Mesothelioma                    | Male   | Education (years per capita)                           |              |              | X            |              |              | X            |
| Mesothelioma                    | Female | Education (years per capita)                           |              |              | X            |              |              | X            |
| Mesothelioma                    | Male   | Population Density (over 1000 ppl-sqkm, proportion)    |              | X            |              |              | X            |              |
| Mesothelioma                    | Female | Population Density (over 1000 ppl-sqkm, proportion)    |              | X            |              |              | X            |              |
| Mesothelioma                    | Male   | Cumulative Cigarettes (5 Years)                        | X            |              |              | X            |              |              |
| Mesothelioma                    | Female | Log-transformed SEV scalar: Mesothel                   | X            |              |              | X            |              |              |
| Mesothelioma                    | Male   | Gold production (kg) per capita                        |              | X            |              |              | X            |              |
| Mesothelioma                    | Female | Gold production (kg) per capita                        |              | X            |              |              | X            |              |
| Mesothelioma                    | Male   | Gold production (binary)                               |              | X            |              |              | X            |              |
| Mesothelioma                    | Female | Gold production (binary)                               |              | X            |              |              | X            |              |
| Mesothelioma                    | Female | Smoking Prevalence                                     |              | X            |              | X            |              |              |
| Mesothelioma                    | Male   | Smoking Prevalence                                     |              | X            |              | X            |              |              |
| Mesothelioma                    | Female | Cumulative Cigarettes (5 Years)                        |              | X            |              | X            |              |              |
| Mesothelioma                    | Female | Asbestos production (kg) per capita                    |              | X            |              |              | X            |              |
| Mesothelioma                    | Female | Asbestos production (binary)                           | X            |              |              | X            |              |              |
| Hodgkin lymphoma                | Male   | LDI (5 per capita)                                     |              |              | X            |              |              | X            |
| Hodgkin lymphoma                | Female | Socio-demographic Index                                |              |              | X            |              |              | X            |
| Hodgkin lymphoma                | Male   | Socio-demographic Index                                |              |              | X            |              |              | X            |
| Hodgkin lymphoma                | Female | Healthcare access and quality index                    |              | X            |              |              | X            |              |
| Hodgkin lymphoma                | Male   | Education (years per capita)                           |              |              | X            |              |              | X            |
| Hodgkin lymphoma                | Female | LDI (5 per capita)                                     |              |              | X            |              |              | X            |
| Hodgkin lymphoma                | Female | Education (years per capita)                           |              |              | X            |              |              | X            |
| Hodgkin lymphoma                | Male   | Healthcare access and quality index                    |              | X            |              |              | X            |              |
| Non-Hodgkin's lymphoma          | Female | Cumulative Cigarettes (10 Years)                       |              | X            |              |              | X            |              |
| Non-Hodgkin's lymphoma          | Female | Smoking Prevalence                                     |              | X            |              |              | X            |              |

Appendix Table 10: Comparison of GBD 2016 and GBD 2017 covariates and level of covariates used in cause of death modeling

| Cause                   | Sex    | Covariate                                              | Level 1 2017 | Level 2 2017 | Level 3 2017 | Level 1 2016 | Level 2 2016 | Level 3 2016 |
|-------------------------|--------|--------------------------------------------------------|--------------|--------------|--------------|--------------|--------------|--------------|
| Non-Hodgkin's lymphoma  | Male   | Smoking Prevalence                                     |              | X            |              |              | X            |              |
| Non-Hodgkin's lymphoma  | Female | Socio-demographic Index                                |              |              | X            |              |              | X            |
| Non-Hodgkin's lymphoma  | Male   | Socio-demographic Index                                |              |              | X            |              |              | X            |
| Non-Hodgkin's lymphoma  | Female | Healthcare access and quality index                    |              | X            |              |              | X            |              |
| Non-Hodgkin's lymphoma  | Male   | Healthcare access and quality index                    |              | X            |              |              | X            |              |
| Non-Hodgkin's lymphoma  | Female | LDI (5\$ per capita)                                   |              |              | X            |              |              | X            |
| Non-Hodgkin's lymphoma  | Male   | LDI (5\$ per capita)                                   |              |              | X            |              |              | X            |
| Non-Hodgkin's lymphoma  | Female | Alcohol (liters per capita)                            |              | X            |              |              | X            |              |
| Non-Hodgkin's lymphoma  | Male   | Alcohol (liters per capita)                            |              | X            |              |              | X            |              |
| Non-Hodgkin's lymphoma  | Female | Total Fertility Rate                                   |              |              | X            |              |              | X            |
| Non-Hodgkin's lymphoma  | Male   | Cumulative Cigarettes (10 Years)                       |              | X            |              |              | X            |              |
| Multiple myeloma        | Male   | Tobacco (cigarettes per capita)                        | X            |              |              | X            |              |              |
| Multiple myeloma        | Female | Tobacco (cigarettes per capita)                        | X            |              |              | X            |              |              |
| Multiple myeloma        | Male   | Improved Water Source (proportion with access)         |              | X            |              |              | X            |              |
| Multiple myeloma        | Female | Sanitation (proportion with access)                    |              | X            |              |              | X            |              |
| Multiple myeloma        | Female | red meats adjusted(g)                                  |              | X            |              |              | X            |              |
| Multiple myeloma        | Male   | red meats adjusted(g)                                  |              | X            |              |              | X            |              |
| Multiple myeloma        | Female | Socio-demographic Index                                |              |              | X            |              |              | X            |
| Multiple myeloma        | Male   | Socio-demographic Index                                |              |              | X            |              |              | X            |
| Multiple myeloma        | Female | Improved Water Source (proportion with access)         |              | X            |              |              | X            |              |
| Multiple myeloma        | Male   | Mean BMI                                               |              | X            |              |              | X            |              |
| Multiple myeloma        | Male   | Smoking Prevalence                                     | X            |              |              | X            |              |              |
| Multiple myeloma        | Female | Healthcare access and quality index                    |              | X            |              |              | X            |              |
| Multiple myeloma        | Female | LDI (5\$ per capita)                                   |              |              | X            |              |              | X            |
| Multiple myeloma        | Male   | LDI (5\$ per capita)                                   |              |              | X            |              |              | X            |
| Multiple myeloma        | Female | Education (years per capita)                           |              |              | X            |              |              | X            |
| Multiple myeloma        | Male   | Education (years per capita)                           |              |              | X            |              |              | X            |
| Multiple myeloma        | Female | Alcohol (liters per capita)                            | X            |              |              | X            |              |              |
| Multiple myeloma        | Male   | Alcohol (liters per capita)                            | X            |              |              | X            |              |              |
| Multiple myeloma        | Male   | Healthcare access and quality index                    |              | X            |              |              | X            |              |
| Multiple myeloma        | Female | Smoking Prevalence                                     | X            |              |              | X            |              |              |
| Multiple myeloma        | Female | Mean BMI                                               |              | X            |              |              | X            |              |
| Multiple myeloma        | Male   | Sanitation (proportion with access)                    |              | X            |              |              | X            |              |
| Multiple myeloma        | Female | fruits adjusted(g)                                     |              | X            |              |              | X            |              |
| Multiple myeloma        | Male   | vegetables adjusted(g)                                 |              | X            |              |              | X            |              |
| Multiple myeloma        | Female | vegetables adjusted(g)                                 |              | X            |              |              | X            |              |
| Multiple myeloma        | Male   | fruits adjusted(g)                                     |              | X            |              |              | X            |              |
| Leukemia                | Female | Tobacco (cigarettes per capita)                        |              | X            |              |              | X            |              |
| Leukemia                | Female | Tobacco (cigarettes per capita)                        |              | X            |              |              | X            |              |
| Leukemia                | Male   | Tobacco (cigarettes per capita)                        |              | X            |              |              | X            |              |
| Leukemia                | Male   | Tobacco (cigarettes per capita)                        |              | X            |              |              | X            |              |
| Leukemia                | Female | Cumulative Cigarettes (15 Years)                       |              | X            |              |              | X            |              |
| Leukemia                | Female | Cumulative Cigarettes (20 Years)                       |              | X            |              |              | X            |              |
| Leukemia                | Male   | Cumulative Cigarettes (20 Years)                       |              | X            |              |              | X            |              |
| Leukemia                | Female | Log-transformed SEV scalar: Leukemia                   | X            |              |              | X            |              |              |
| Leukemia                | Male   | Log-transformed SEV scalar: Leukemia                   | X            |              |              | X            |              |              |
| Leukemia                | Female | Log-transformed age-standardized SEV scalar: Leukemia  | X            |              |              | X            |              |              |
| Leukemia                | Male   | Cumulative Cigarettes (15 Years)                       |              | X            |              |              | X            |              |
| Leukemia                | Male   | Cumulative Cigarettes (5 Years)                        |              | X            |              |              | X            |              |
| Leukemia                | Male   | Alcohol (liters per capita)                            |              | X            |              |              | X            |              |
| Leukemia                | Male   | Cumulative Cigarettes (10 Years)                       |              | X            |              |              | X            |              |
| Leukemia                | Female | Cumulative Cigarettes (10 Years)                       |              | X            |              |              | X            |              |
| Leukemia                | Male   | Smoking Prevalence                                     |              | X            |              |              | X            |              |
| Leukemia                | Female | Smoking Prevalence                                     |              | X            |              |              | X            |              |
| Leukemia                | Male   | Socio-demographic Index                                |              |              | X            |              |              | X            |
| Leukemia                | Female | Socio-demographic Index                                |              |              | X            |              |              | X            |
| Leukemia                | Female | Healthcare access and quality index                    |              | X            |              |              | X            |              |
| Leukemia                | Male   | LDI (5\$ per capita)                                   |              |              | X            |              |              | X            |
| Leukemia                | Female | LDI (5\$ per capita)                                   |              |              | X            |              |              | X            |
| Leukemia                | Male   | Education (years per capita)                           |              |              | X            |              |              | X            |
| Leukemia                | Female | Education (years per capita)                           |              |              | X            |              |              | X            |
| Leukemia                | Female | Cumulative Cigarettes (5 Years)                        |              | X            |              |              | X            |              |
| Leukemia                | Male   | Log-transformed age-standardized SEV scalar: Leukemia  | X            |              |              | X            |              |              |
| Leukemia                | Female | Alcohol (liters per capita)                            |              | X            |              |              | X            |              |
| Cardiovascular diseases | Female | pulses legumes adjusted(g)                             |              |              | X            |              |              | X            |
| Cardiovascular diseases | Male   | Healthcare access and quality index                    |              | X            |              |              | X            |              |
| Cardiovascular diseases | Female | Mean BMI                                               |              | X            |              |              | X            |              |
| Cardiovascular diseases | Male   | Mean BMI                                               |              | X            |              |              | X            |              |
| Cardiovascular diseases | Female | Socio-demographic Index                                |              |              | X            |              |              | X            |
| Cardiovascular diseases | Male   | Socio-demographic Index                                |              |              | X            |              |              | X            |
| Cardiovascular diseases | Female | Diabetes Fasting Plasma Glucose (mmol/L)               |              | X            |              |              | X            |              |
| Cardiovascular diseases | Male   | Diabetes Fasting Plasma Glucose (mmol/L)               |              | X            |              |              | X            |              |
| Cardiovascular diseases | Female | Cholesterol (total, mean per capita)                   | X            |              |              | X            |              |              |
| Cardiovascular diseases | Male   | Cholesterol (total, mean per capita)                   | X            |              |              | X            |              |              |
| Cardiovascular diseases | Female | Systolic Blood Pressure (mmHg)                         | X            |              |              | X            |              |              |
| Cardiovascular diseases | Male   | Systolic Blood Pressure (mmHg)                         | X            |              |              | X            |              |              |
| Cardiovascular diseases | Female | Indoor Air Pollution (All Cooking Fuels)               |              | X            |              |              | X            |              |
| Cardiovascular diseases | Male   | Indoor Air Pollution (All Cooking Fuels)               |              | X            |              |              | X            |              |
| Cardiovascular diseases | Female | Outdoor Air Pollution (PM2.5)                          |              | X            |              |              | X            |              |
| Cardiovascular diseases | Male   | Outdoor Air Pollution (PM2.5)                          |              | X            |              |              | X            |              |
| Cardiovascular diseases | Female | Smoking Prevalence                                     | X            |              |              | X            |              |              |
| Cardiovascular diseases | Male   | Smoking Prevalence                                     | X            |              |              | X            |              |              |
| Cardiovascular diseases | Female | Healthcare access and quality index                    |              | X            |              |              | X            |              |
| Cardiovascular diseases | Female | omega 3 adjusted(g)                                    |              |              | X            |              |              | X            |
| Cardiovascular diseases | Male   | Elevation Over 1500m (proportion)                      |              | X            |              |              | X            |              |
| Cardiovascular diseases | Male   | LDI (5\$ per capita)                                   |              |              | X            |              |              | X            |
| Cardiovascular diseases | Male   | Diet high in trans fatty acids                         |              |              | X            |              |              | X            |
| Cardiovascular diseases | Female | Log-transformed SEV scalar: CVD                        | X            |              |              | X            |              |              |
| Cardiovascular diseases | Female | Log-transformed SEV scalar: CVD                        | X            |              |              | X            |              |              |
| Cardiovascular diseases | Male   | vegetables adjusted(g)                                 |              |              | X            |              |              | X            |
| Cardiovascular diseases | Female | vegetables adjusted(g)                                 |              |              | X            |              |              | X            |
| Cardiovascular diseases | Male   | pulses legumes adjusted(g)                             |              |              | X            |              |              | X            |
| Cardiovascular diseases | Female | Elevation Over 1500m (proportion)                      |              | X            |              |              | X            |              |
| Cardiovascular diseases | Male   | pufa adjusted(percentage)                              |              |              | X            |              |              | X            |
| Cardiovascular diseases | Male   | nuts seeds adjusted(g)                                 |              |              | X            |              |              | X            |
| Cardiovascular diseases | Female | nuts seeds adjusted(g)                                 |              |              | X            |              |              | X            |
| Cardiovascular diseases | Male   | fruits adjusted(g)                                     |              |              | X            |              |              | X            |
| Cardiovascular diseases | Female | fruits adjusted(g)                                     |              |              | X            |              |              | X            |
| Cardiovascular diseases | Female | Alcohol (liters per capita)                            |              |              | X            |              |              | X            |
| Cardiovascular diseases | Male   | Alcohol (liters per capita)                            |              |              | X            |              |              | X            |
| Cardiovascular diseases | Female | LDI (5\$ per capita)                                   |              |              | X            |              |              | X            |
| Cardiovascular diseases | Female | pufa adjusted(percentage)                              |              |              | X            |              |              | X            |
| Cardiovascular diseases | Male   | omega 3 adjusted(g)                                    |              |              | X            |              |              | X            |
| Rheumatic heart disease | Male   | Log-transformed SEV scalar: RHD                        | X            |              |              | X            |              |              |
| Rheumatic heart disease | Female | Underweight (proportion <2SD weight for age, <5 years) | X            |              |              | X            |              |              |
| Rheumatic heart disease | Male   | Education (years per capita)                           |              |              | X            |              |              | X            |
| Rheumatic heart disease | Female | Log-transformed SEV scalar: RHD                        | X            |              |              | X            |              |              |
| Rheumatic heart disease | Female | Improved Water Source (proportion with access)         | X            |              |              | X            |              |              |
| Rheumatic heart disease | Male   | Improved Water Source (proportion with access)         | X            |              |              | X            |              |              |
| Rheumatic heart disease | Female | Sanitation (proportion with access)                    | X            |              |              | X            |              |              |
| Rheumatic heart disease | Male   | Sanitation (proportion with access)                    | X            |              |              | X            |              |              |
| Rheumatic heart disease | Female | Socio-demographic Index                                |              |              | X            |              |              | X            |
| Rheumatic heart disease | Female | Healthcare access and quality index                    |              | X            |              |              | X            |              |
| Rheumatic heart disease | Male   | Healthcare access and quality index                    |              | X            |              |              | X            |              |
| Rheumatic heart disease | Female | LDI (5\$ per capita)                                   |              |              | X            |              |              | X            |
| Rheumatic heart disease | Male   | LDI (5\$ per capita)                                   |              |              | X            |              |              | X            |
| Rheumatic heart disease | Male   | Underweight (proportion <2SD weight for age, <5 years) | X            |              |              | X            |              |              |
| Rheumatic heart disease | Female | Education (years per capita)                           |              |              | X            |              |              | X            |
| Rheumatic heart disease | Male   | pufa adjusted(percentage)                              |              |              | X            |              |              | X            |
| Rheumatic heart disease | Female | Cholesterol (total, mean per capita)                   | X            |              |              | X            |              |              |
| Rheumatic heart disease | Male   | Cholesterol (total, mean per capita)                   | X            |              |              | X            |              |              |
| Rheumatic heart disease | Female | Diabetes Fasting Plasma Glucose (mmol/L)               |              |              | X            |              |              | X            |

Appendix Table 10: Comparison of GBD 2016 and GBD 2017 covariates and level of covariates used in cause of death modeling

| Cause                    | Sex    | Covariate                                | Level 1 2017 | Level 2 2017 | Level 3 2017 | Level 1 2016 | Level 2 2016 | Level 3 2016 |
|--------------------------|--------|------------------------------------------|--------------|--------------|--------------|--------------|--------------|--------------|
| Ischaemic heart disease  | Male   | Diabetes Fasting Plasma Glucose (mmol/L) |              | X            |              |              | X            |              |
| Ischaemic heart disease  | Female | Socio-demographic Index                  |              |              | X            |              |              | X            |
| Ischaemic heart disease  | Male   | Socio-demographic Index                  |              |              | X            |              |              | X            |
| Ischaemic heart disease  | Female | Mean BMI                                 |              | X            |              |              | X            |              |
| Ischaemic heart disease  | Male   | Mean BMI                                 |              | X            |              |              | X            |              |
| Ischaemic heart disease  | Female | Healthcare access and quality index      |              | X            |              |              | X            |              |
| Ischaemic heart disease  | Male   | Healthcare access and quality index      |              | X            |              |              | X            |              |
| Ischaemic heart disease  | Female | Elevation Over 1500m (proportion)        |              | X            |              |              | X            |              |
| Ischaemic heart disease  | Male   | Elevation Over 1500m (proportion)        |              | X            |              |              | X            |              |
| Ischaemic heart disease  | Female | LDI (5 per capita)                       |              |              | X            |              |              | X            |
| Ischaemic heart disease  | Male   | LDI (5 per capita)                       |              |              | X            |              |              | X            |
| Ischaemic heart disease  | Female | Alcohol (liters per capita)              |              |              | X            |              |              | X            |
| Ischaemic heart disease  | Male   | Alcohol (liters per capita)              |              |              | X            |              |              | X            |
| Ischaemic heart disease  | Female | Systolic Blood Pressure (mmHg)           | X            |              |              | X            |              |              |
| Ischaemic heart disease  | Male   | Systolic Blood Pressure (mmHg)           | X            |              |              | X            |              |              |
| Ischaemic heart disease  | Female | nuts seeds adjusted(g)                   |              |              | X            |              |              | X            |
| Ischaemic heart disease  | Male   | nuts seeds adjusted(g)                   |              |              | X            |              |              | X            |
| Ischaemic heart disease  | Female | Indoor Air Pollution (All Cooking Fuels) |              | X            |              |              | X            |              |
| Ischaemic heart disease  | Male   | Indoor Air Pollution (All Cooking Fuels) |              | X            |              |              | X            |              |
| Ischaemic heart disease  | Female | Outdoor Air Pollution (PM2.5)            |              | X            |              |              | X            |              |
| Ischaemic heart disease  | Male   | Outdoor Air Pollution (PM2.5)            |              | X            |              |              | X            |              |
| Ischaemic heart disease  | Female | pufa adjusted(percent)                   |              |              | X            |              |              | X            |
| Ischaemic heart disease  | Male   | pufa adjusted(percent)                   |              |              | X            |              |              | X            |
| Ischaemic heart disease  | Female | pulses legumes adjusted(g)               |              |              | X            |              |              | X            |
| Ischaemic heart disease  | Male   | pulses legumes adjusted(g)               |              |              | X            |              |              | X            |
| Ischaemic heart disease  | Female | vegetables adjusted(g)                   |              |              | X            |              |              | X            |
| Ischaemic heart disease  | Male   | vegetables adjusted(g)                   |              |              | X            |              |              | X            |
| Ischaemic heart disease  | Female | Diet high in trans fatty acids           |              |              | X            |              |              | X            |
| Ischaemic heart disease  | Male   | Diet high in trans fatty acids           |              |              | X            |              |              | X            |
| Ischaemic heart disease  | Female | Outdoor Air Pollution (PM2.5)            |              | X            |              |              | X            |              |
| Ischaemic heart disease  | Male   | Outdoor Air Pollution (PM2.5)            |              | X            |              |              | X            |              |
| Ischaemic heart disease  | Female | Log-transformed SEV scalar: HDD          | X            |              |              | X            |              |              |
| Ischaemic heart disease  | Male   | Log-transformed SEV scalar: HDD          | X            |              |              | X            |              |              |
| Ischaemic heart disease  | Female | fruits adjusted(g)                       |              |              | X            |              |              | X            |
| Ischaemic heart disease  | Male   | fruits adjusted(g)                       |              |              | X            |              |              | X            |
| Ischaemic heart disease  | Female | Alcohol (liters per capita)              |              |              | X            |              |              | X            |
| Ischaemic heart disease  | Male   | Alcohol (liters per capita)              |              |              | X            |              |              | X            |
| Ischaemic heart disease  | Female | omega 3 adjusted(g)                      |              |              | X            |              |              | X            |
| Ischaemic heart disease  | Male   | omega 3 adjusted(g)                      |              |              | X            |              |              | X            |
| Ischaemic heart disease  | Female | Smoking Prevalence                       | X            |              |              | X            |              |              |
| Ischaemic heart disease  | Male   | Smoking Prevalence                       | X            |              |              | X            |              |              |
| Ischaemic heart disease  | Female | nuts seeds adjusted(g)                   |              |              | X            |              |              | X            |
| Ischaemic heart disease  | Male   | nuts seeds adjusted(g)                   |              |              | X            |              |              | X            |
| Ischaemic heart disease  | Female | Log-transformed SEV scalar: HDD          | X            |              |              | X            |              |              |
| Ischaemic heart disease  | Male   | Log-transformed SEV scalar: HDD          | X            |              |              | X            |              |              |
| Ischaemic heart disease  | Female | Systolic Blood Pressure (mmHg)           | X            |              |              | X            |              |              |
| Ischaemic heart disease  | Male   | Systolic Blood Pressure (mmHg)           | X            |              |              | X            |              |              |
| Stroke                   | Male   | LDI (5 per capita)                       |              |              | X            |              |              | X            |
| Stroke                   | Female | LDI (5 per capita)                       |              |              | X            |              |              | X            |
| Stroke                   | Male   | omega 3 adjusted(g)                      |              |              | X            |              |              | X            |
| Stroke                   | Female | omega 3 adjusted(g)                      |              |              | X            |              |              | X            |
| Stroke                   | Male   | fruits adjusted(g)                       |              | X            |              |              | X            |              |
| Stroke                   | Female | fruits adjusted(g)                       |              | X            |              |              | X            |              |
| Stroke                   | Female | Log-transformed SEV scalar: Stroke       | X            |              |              | X            |              |              |
| Stroke                   | Male   | Log-transformed SEV scalar: Stroke       | X            |              |              | X            |              |              |
| Stroke                   | Female | Diet high in trans fatty acids           |              |              | X            |              |              | X            |
| Stroke                   | Male   | Diet high in trans fatty acids           |              |              | X            |              |              | X            |
| Stroke                   | Female | vegetables adjusted(g)                   |              |              | X            |              |              | X            |
| Stroke                   | Male   | vegetables adjusted(g)                   |              |              | X            |              |              | X            |
| Stroke                   | Female | pulses legumes adjusted(g)               |              |              | X            |              |              | X            |
| Stroke                   | Male   | pulses legumes adjusted(g)               |              |              | X            |              |              | X            |
| Stroke                   | Female | pufa adjusted(percent)                   |              |              | X            |              |              | X            |
| Stroke                   | Male   | pufa adjusted(percent)                   |              |              | X            |              |              | X            |
| Stroke                   | Female | nuts seeds adjusted(g)                   |              |              | X            |              |              | X            |
| Stroke                   | Male   | nuts seeds adjusted(g)                   |              |              | X            |              |              | X            |
| Stroke                   | Female | Smoking Prevalence                       | X            |              |              | X            |              |              |
| Stroke                   | Male   | Smoking Prevalence                       | X            |              |              | X            |              |              |
| Stroke                   | Female | Outdoor Air Pollution (PM2.5)            |              | X            |              |              | X            |              |
| Stroke                   | Male   | Outdoor Air Pollution (PM2.5)            |              | X            |              |              | X            |              |
| Stroke                   | Female | LDI (5 per capita)                       |              |              | X            |              |              | X            |
| Stroke                   | Male   | LDI (5 per capita)                       |              |              | X            |              |              | X            |
| Stroke                   | Female | Elevation Over 1500m (proportion)        |              | X            |              |              | X            |              |
| Stroke                   | Male   | Elevation Over 1500m (proportion)        |              | X            |              |              | X            |              |
| Stroke                   | Female | Healthcare access and quality index      |              | X            |              |              | X            |              |
| Stroke                   | Male   | Healthcare access and quality index      |              | X            |              |              | X            |              |
| Stroke                   | Female | Mean BMI                                 |              | X            |              |              | X            |              |
| Stroke                   | Male   | Mean BMI                                 |              | X            |              |              | X            |              |
| Stroke                   | Female | Socio-demographic Index                  |              |              | X            |              |              | X            |
| Stroke                   | Male   | Socio-demographic Index                  |              |              | X            |              |              | X            |
| Stroke                   | Female | Alcohol (liters per capita)              |              |              | X            |              |              | X            |
| Stroke                   | Male   | Alcohol (liters per capita)              |              |              | X            |              |              | X            |
| Stroke                   | Female | Socio-demographic Index                  |              |              | X            |              |              | X            |
| Stroke                   | Male   | Socio-demographic Index                  |              |              | X            |              |              | X            |
| Stroke                   | Female | Diabetes Fasting Plasma Glucose (mmol/L) |              | X            |              |              | X            |              |
| Stroke                   | Male   | Diabetes Fasting Plasma Glucose (mmol/L) |              | X            |              |              | X            |              |
| Stroke                   | Female | Cholesterol (total, mean per capita)     | X            |              |              | X            |              |              |
| Stroke                   | Male   | Cholesterol (total, mean per capita)     | X            |              |              | X            |              |              |
| Stroke                   | Female | Systolic Blood Pressure (mmHg)           | X            |              |              | X            |              |              |
| Stroke                   | Male   | Systolic Blood Pressure (mmHg)           | X            |              |              | X            |              |              |
| Stroke                   | Female | Indoor Air Pollution (All Cooking Fuels) |              | X            |              |              | X            |              |
| Stroke                   | Male   | Indoor Air Pollution (All Cooking Fuels) |              | X            |              |              | X            |              |
| Stroke                   | Female | Diabetes Fasting Plasma Glucose (mmol/L) |              |              | X            |              |              | X            |
| Stroke                   | Male   | Diabetes Fasting Plasma Glucose (mmol/L) |              |              | X            |              |              | X            |
| Stroke                   | Female | Healthcare access and quality index      |              |              | X            |              |              | X            |
| Stroke                   | Male   | Healthcare access and quality index      |              |              | X            |              |              | X            |
| Ischaemic stroke         | Female | Indoor Air Pollution (All Cooking Fuels) |              | X            |              |              | X            |              |
| Ischaemic stroke         | Male   | Indoor Air Pollution (All Cooking Fuels) |              | X            |              |              | X            |              |
| Ischaemic stroke         | Female | omega 3 adjusted(g)                      |              |              | X            |              |              | X            |
| Ischaemic stroke         | Male   | omega 3 adjusted(g)                      |              |              | X            |              |              | X            |
| Ischaemic stroke         | Female | Smoking Prevalence                       | X            |              |              | X            |              |              |
| Ischaemic stroke         | Male   | Smoking Prevalence                       | X            |              |              | X            |              |              |
| Ischaemic stroke         | Female | Outdoor Air Pollution (PM2.5)            |              | X            |              |              | X            |              |
| Ischaemic stroke         | Male   | Outdoor Air Pollution (PM2.5)            |              | X            |              |              | X            |              |
| Ischaemic stroke         | Female | Indoor Air Pollution (All Cooking Fuels) |              | X            |              |              | X            |              |
| Ischaemic stroke         | Male   | Indoor Air Pollution (All Cooking Fuels) |              | X            |              |              | X            |              |
| Ischaemic stroke         | Female | Systolic Blood Pressure (mmHg)           |              | X            |              |              | X            |              |
| Ischaemic stroke         | Male   | Systolic Blood Pressure (mmHg)           |              | X            |              |              | X            |              |
| Ischaemic stroke         | Female | Cholesterol (total, mean per capita)     | X            |              |              | X            |              |              |
| Ischaemic stroke         | Male   | Cholesterol (total, mean per capita)     | X            |              |              | X            |              |              |
| Ischaemic stroke         | Female | Diabetes Fasting Plasma Glucose (mmol/L) |              | X            |              |              | X            |              |
| Ischaemic stroke         | Male   | Diabetes Fasting Plasma Glucose (mmol/L) |              | X            |              |              | X            |              |
| Ischaemic stroke         | Female | omega 3 adjusted(g)                      |              |              | X            |              |              | X            |
| Ischaemic stroke         | Male   | omega 3 adjusted(g)                      |              |              | X            |              |              | X            |
| Ischaemic stroke         | Female | Diabetes Fasting Plasma Glucose (mmol/L) |              | X            |              |              | X            |              |
| Ischaemic stroke         | Male   | Diabetes Fasting Plasma Glucose (mmol/L) |              | X            |              |              | X            |              |
| Ischaemic stroke         | Female | Socio-demographic Index                  |              |              | X            |              |              | X            |
| Ischaemic stroke         | Male   | Socio-demographic Index                  |              |              | X            |              |              | X            |
| Ischaemic stroke         | Female | Mean BMI                                 |              | X            |              |              | X            |              |
| Ischaemic stroke         | Male   | Mean BMI                                 |              | X            |              |              | X            |              |
| Ischaemic stroke         | Female | Healthcare access and quality index      |              | X            |              |              | X            |              |
| Ischaemic stroke         | Male   | Healthcare access and quality index      |              | X            |              |              | X            |              |
| Ischaemic stroke         | Female | Elevation Over 1500m (proportion)        |              | X            |              |              | X            |              |
| Ischaemic stroke         | Male   | Elevation Over 1500m (proportion)        |              | X            |              |              | X            |              |
| Ischaemic stroke         | Female | LDI (5 per capita)                       |              |              | X            |              |              | X            |
| Ischaemic stroke         | Male   | LDI (5 per capita)                       |              |              | X            |              |              | X            |
| Ischaemic stroke         | Female | Alcohol (liters per capita)              |              |              | X            |              |              | X            |
| Ischaemic stroke         | Male   | Alcohol (liters per capita)              |              |              | X            |              |              | X            |
| Ischaemic stroke         | Female | Socio-demographic Index                  |              |              | X            |              |              | X            |
| Ischaemic stroke         | Male   | Socio-demographic Index                  |              |              | X            |              |              | X            |
| Ischaemic stroke         | Female | fruits adjusted(g)                       |              |              | X            |              |              | X            |
| Ischaemic stroke         | Male   | fruits adjusted(g)                       |              |              | X            |              |              | X            |
| Ischaemic stroke         | Female | nuts seeds adjusted(g)                   |              |              | X            |              |              | X            |
| Ischaemic stroke         | Male   | nuts seeds adjusted(g)                   |              |              | X            |              |              | X            |
| Ischaemic stroke         | Female | pufa adjusted(percent)                   |              |              | X            |              |              | X            |
| Ischaemic stroke         | Male   | pufa adjusted(percent)                   |              |              | X            |              |              | X            |
| Ischaemic stroke         | Female | pulses legumes adjusted(g)               |              |              | X            |              |              | X            |
| Ischaemic stroke         | Male   | pulses legumes adjusted(g)               |              |              | X            |              |              | X            |
| Ischaemic stroke         | Female | vegetables adjusted(g)                   |              |              | X            |              |              | X            |
| Ischaemic stroke         | Male   | vegetables adjusted(g)                   |              |              | X            |              |              | X            |
| Ischaemic stroke         | Female | Diet high in trans fatty acids           |              |              | X            |              |              | X            |
| Ischaemic stroke         | Male   | Diet high in trans fatty acids           |              |              | X            |              |              | X            |
| Ischaemic stroke         | Female | nuts seeds adjusted(g)                   |              |              | X            |              |              | X            |
| Ischaemic stroke         | Male   | nuts seeds adjusted(g)                   |              |              | X            |              |              | X            |
| Ischaemic stroke         | Female | Log-transformed SEV scalar: Isch Stroke  | X            |              |              | X            |              |              |
| Ischaemic stroke         | Male   | Log-transformed SEV scalar: Isch Stroke  | X            |              |              | X            |              |              |
| Intracerebral hemorrhage | Female | Log-transformed SEV scalar: Hem Stroke   | X            |              |              | X            |              |              |
| Intracerebral hemorrhage | Male   | Log-transformed SEV scalar: Hem Stroke   | X            |              |              | X            |              |              |
| Intracerebral hemorrhage | Female | Diet high in trans fatty acids           |              |              | X            |              |              | X            |
| Intracerebral hemorrhage | Male   | Diet high in trans fatty acids           |              |              | X            |              |              | X            |
| Intracerebral hemorrhage | Female | vegetables adjusted(g)                   |              |              | X            |              |              | X            |
| Intracerebral hemorrhage | Male   | vegetables adjusted(g)                   |              |              | X            |              |              | X            |
| Intracerebral hemorrhage | Female | pulses legumes adjusted(g)               |              |              | X            |              |              | X            |
| Intracerebral hemorrhage | Male   | pulses legumes adjusted(g)               |              |              | X            |              |              | X            |
| Intracerebral hemorrhage | Female | Cholesterol (total, mean per capita)     | X            |              |              | X            |              |              |
| Intracerebral hemorrhage | Male   | Cholesterol (total, mean per capita)     | X            |              |              | X            |              |              |
| Intracerebral hemorrhage | Female | Alcohol (liters per capita)              |              |              | X            |              |              | X            |



Appendix Table 10: Comparison of GBD 2016 and GBD 2017 covariates and level of covariates used in cause of death modeling

| Cause                          | Sex    | Covariate                                      | Level 1 2017 | Level 2 2017 | Level 3 2017 | Level 1 2016 | Level 2 2016 | Level 3 2016 |
|--------------------------------|--------|------------------------------------------------|--------------|--------------|--------------|--------------|--------------|--------------|
| Intracerebral hemorrhage       | Male   | Systemic Blood Pressure (mmHg)                 | X            |              |              | X            |              |              |
| Intracerebral hemorrhage       | Female | Systemic Blood Pressure (mmHg)                 | X            |              |              | X            |              |              |
| Intracerebral hemorrhage       | Male   | Indoor Air Pollution (All Cooking Fuels)       |              | X            |              |              | X            |              |
| Intracerebral hemorrhage       | Female | Indoor Air Pollution (All Cooking Fuels)       |              | X            |              |              | X            |              |
| Intracerebral hemorrhage       | Male   | Outdoor Air Pollution (PM2.5)                  |              | X            |              |              | X            |              |
| Intracerebral hemorrhage       | Female | Diabetes Fasting Plasma Glucose (mmol/L)       |              | X            |              |              | X            |              |
| Intracerebral hemorrhage       | Female | pufa adjusted(percent)                         |              |              | X            |              |              | X            |
| Intracerebral hemorrhage       | Male   | Diabetes Fasting Plasma Glucose (mmol/L)       |              | X            |              |              | X            |              |
| Intracerebral hemorrhage       | Male   | Alcohol (liters per capita)                    |              |              | X            |              |              | X            |
| Intracerebral hemorrhage       | Female | Socio-demographic Index                        |              |              | X            |              |              | X            |
| Intracerebral hemorrhage       | Female | Mean BMI                                       |              | X            |              |              | X            |              |
| Intracerebral hemorrhage       | Male   | Mean BMI                                       |              | X            |              |              | X            |              |
| Intracerebral hemorrhage       | Female | Healthcare access and quality index            |              | X            |              |              | X            |              |
| Intracerebral hemorrhage       | Male   | Healthcare access and quality index            |              | X            |              |              | X            |              |
| Intracerebral hemorrhage       | Female | Elevation Over 1500m (proportion)              |              | X            |              |              | X            |              |
| Intracerebral hemorrhage       | Male   | Elevation Over 1500m (proportion)              |              | X            |              |              | X            |              |
| Intracerebral hemorrhage       | Female | LDI (I\$ per capita)                           |              |              | X            |              |              | X            |
| Intracerebral hemorrhage       | Male   | LDI (I\$ per capita)                           |              |              | X            |              |              | X            |
| Intracerebral hemorrhage       | Male   | Socio-demographic Index                        |              |              | X            |              |              | X            |
| Intracerebral hemorrhage       | Female | nuts seeds adjusted(g)                         |              |              | X            |              |              | X            |
| Intracerebral hemorrhage       | Male   | pufa adjusted(percent)                         |              |              | X            |              |              | X            |
| Intracerebral hemorrhage       | Female | Smoking Prevalence                             | X            |              |              | X            |              |              |
| Intracerebral hemorrhage       | Male   | nuts seeds adjusted(g)                         |              |              | X            |              |              | X            |
| Intracerebral hemorrhage       | Female | fruits adjusted(g)                             |              |              | X            |              |              | X            |
| Intracerebral hemorrhage       | Male   | fruits adjusted(g)                             |              |              | X            |              |              | X            |
| Intracerebral hemorrhage       | Female | omega 3 adjusted(g)                            |              |              | X            |              |              | X            |
| Intracerebral hemorrhage       | Male   | omega 3 adjusted(g)                            |              |              | X            |              |              | X            |
| Intracerebral hemorrhage       | Female | Outdoor Air Pollution (PM2.5)                  |              | X            |              |              | X            |              |
| Intracerebral hemorrhage       | Male   | Smoking Prevalence                             | X            |              |              | X            |              |              |
| Hypertensive heart disease     | Female | LDI (I\$ per capita)                           |              |              | X            |              |              | X            |
| Hypertensive heart disease     | Female | Smoking Prevalence                             | X            |              |              |              | X            |              |
| Hypertensive heart disease     | Male   | Smoking Prevalence                             | X            |              |              |              | X            |              |
| Hypertensive heart disease     | Male   | Healthcare access and quality index            |              | X            |              |              | X            |              |
| Hypertensive heart disease     | Male   | Systemic Blood Pressure (mmHg)                 | X            |              |              | X            |              |              |
| Hypertensive heart disease     | Female | Cholesterol (total, mean per capita)           | X            |              |              |              | X            |              |
| Hypertensive heart disease     | Male   | Cholesterol (total, mean per capita)           | X            |              |              |              | X            |              |
| Hypertensive heart disease     | Female | Socio-demographic Index                        |              |              | X            |              |              | X            |
| Hypertensive heart disease     | Male   | Socio-demographic Index                        |              |              | X            |              |              | X            |
| Hypertensive heart disease     | Female | Mean BMI                                       |              | X            |              |              | X            |              |
| Hypertensive heart disease     | Male   | Mean BMI                                       |              | X            |              |              | X            |              |
| Hypertensive heart disease     | Female | Healthcare access and quality index            |              | X            |              |              | X            |              |
| Hypertensive heart disease     | Female | Systemic Blood Pressure (mmHg)                 | X            |              |              | X            |              |              |
| Hypertensive heart disease     | Male   | LDI (I\$ per capita)                           |              |              | X            |              |              | X            |
| Hypertensive heart disease     | Female | Alcohol (liters per capita)                    |              |              | X            |              |              | X            |
| Hypertensive heart disease     | Male   | Alcohol (liters per capita)                    |              |              | X            |              |              | X            |
| Cardiomyopathy and myocarditis | Female | Socio-demographic Index                        |              |              | X            |              |              | X            |
| Cardiomyopathy and myocarditis | Male   | Systemic Blood Pressure (mmHg)                 | X            |              |              | X            |              |              |
| Cardiomyopathy and myocarditis | Female | Log-transformed SEV scalar: CMP                | X            |              |              | X            |              |              |
| Cardiomyopathy and myocarditis | Female | Smoking Prevalence                             | X            |              |              | X            |              |              |
| Cardiomyopathy and myocarditis | Male   | Log-transformed SEV scalar: CMP                | X            |              |              | X            |              |              |
| Cardiomyopathy and myocarditis | Male   | LDI (I\$ per capita)                           |              |              | X            |              |              | X            |
| Cardiomyopathy and myocarditis | Female | Systemic Blood Pressure (mmHg)                 | X            |              |              | X            |              |              |
| Cardiomyopathy and myocarditis | Female | LDI (I\$ per capita)                           |              |              | X            |              |              | X            |
| Cardiomyopathy and myocarditis | Male   | Smoking Prevalence                             | X            |              |              | X            |              |              |
| Cardiomyopathy and myocarditis | Female | Healthcare access and quality index            |              | X            |              |              | X            |              |
| Cardiomyopathy and myocarditis | Male   | Socio-demographic Index                        |              | X            |              |              |              | X            |
| Cardiomyopathy and myocarditis | Male   | Healthcare access and quality index            |              | X            |              |              | X            |              |
| Cardiomyopathy and myocarditis | Male   | Mean BMI                                       |              | X            |              |              | X            |              |
| Cardiomyopathy and myocarditis | Female | Mean BMI                                       |              | X            |              |              | X            |              |
| Aortic aneurysm                | Female | Log-transformed SEV scalar: Aort An            | X            |              |              | X            |              |              |
| Aortic aneurysm                | Male   | Alcohol (liters per capita)                    |              |              | X            |              |              | X            |
| Aortic aneurysm                | Female | Alcohol (liters per capita)                    |              |              | X            |              |              | X            |
| Aortic aneurysm                | Male   | LDI (I\$ per capita)                           |              |              | X            |              |              | X            |
| Aortic aneurysm                | Female | LDI (I\$ per capita)                           |              |              | X            |              |              | X            |
| Aortic aneurysm                | Male   | Healthcare access and quality index            |              | X            |              |              | X            |              |
| Aortic aneurysm                | Female | Healthcare access and quality index            |              | X            |              |              | X            |              |
| Aortic aneurysm                | Male   | Mean BMI                                       |              | X            |              |              | X            |              |
| Aortic aneurysm                | Female | Socio-demographic Index                        |              |              | X            |              |              | X            |
| Aortic aneurysm                | Male   | Cholesterol (total, mean per capita)           | X            |              |              | X            |              |              |
| Aortic aneurysm                | Female | Cholesterol (total, mean per capita)           | X            |              |              | X            |              |              |
| Aortic aneurysm                | Male   | Systemic Blood Pressure (mmHg)                 | X            |              |              | X            |              |              |
| Aortic aneurysm                | Female | Systemic Blood Pressure (mmHg)                 | X            |              |              | X            |              |              |
| Aortic aneurysm                | Female | Mean BMI                                       |              | X            |              |              | X            |              |
| Aortic aneurysm                | Female | omega 3 adjusted(g)                            |              |              | X            |              |              | X            |
| Aortic aneurysm                | Male   | Log-transformed SEV scalar: Aort An            | X            |              |              | X            |              |              |
| Aortic aneurysm                | Male   | omega 3 adjusted(g)                            |              |              | X            |              |              | X            |
| Aortic aneurysm                | Female | Cumulative Cigarettes (10 Years)               | X            |              |              | X            |              |              |
| Aortic aneurysm                | Male   | Cumulative Cigarettes (10 Years)               | X            |              |              | X            |              |              |
| Aortic aneurysm                | Female | vegetables adjusted(g)                         |              |              | X            |              |              | X            |
| Aortic aneurysm                | Male   | vegetables adjusted(g)                         |              |              | X            |              |              | X            |
| Aortic aneurysm                | Female | pulses legumes adjusted(g)                     | X            |              |              |              |              | X            |
| Aortic aneurysm                | Male   | Socio-demographic Index                        |              |              | X            |              |              | X            |
| Aortic aneurysm                | Female | pufa adjusted(percent)                         |              |              | X            |              |              | X            |
| Aortic aneurysm                | Male   | pufa adjusted(percent)                         |              |              | X            |              |              | X            |
| Aortic aneurysm                | Female | nuts seeds adjusted(g)                         |              |              | X            |              |              | X            |
| Aortic aneurysm                | Male   | nuts seeds adjusted(g)                         |              |              | X            |              |              | X            |
| Aortic aneurysm                | Female | fruits adjusted(g)                             |              |              | X            |              |              | X            |
| Aortic aneurysm                | Male   | fruits adjusted(g)                             |              |              | X            |              |              | X            |
| Aortic aneurysm                | Male   | pulses legumes adjusted(g)                     | X            |              |              |              |              | X            |
| Peripheral vascular disease    | Female | Smoking Prevalence                             | X            |              |              | X            |              |              |
| Peripheral vascular disease    | Male   | omega 3 adjusted(g)                            |              |              | X            |              |              | X            |
| Peripheral vascular disease    | Female | omega 3 adjusted(g)                            |              |              | X            |              |              | X            |
| Peripheral vascular disease    | Male   | fruits adjusted(g)                             |              |              | X            |              |              | X            |
| Peripheral vascular disease    | Female | fruits adjusted(g)                             |              |              | X            |              |              | X            |
| Peripheral vascular disease    | Male   | nuts seeds adjusted(g)                         |              |              | X            |              |              | X            |
| Peripheral vascular disease    | Female | Log-transformed SEV scalar: PVD                | X            |              |              | X            |              |              |
| Peripheral vascular disease    | Female | Log-transformed SEV scalar: PVD                | X            |              |              | X            |              |              |
| Peripheral vascular disease    | Female | vegetables adjusted(g)                         |              |              | X            |              |              | X            |
| Peripheral vascular disease    | Male   | vegetables adjusted(g)                         |              |              | X            |              |              | X            |
| Peripheral vascular disease    | Female | pulses legumes adjusted(g)                     |              |              | X            |              |              | X            |
| Peripheral vascular disease    | Male   | pufa adjusted(percent)                         |              |              | X            |              |              | X            |
| Peripheral vascular disease    | Female | nuts seeds adjusted(g)                         |              |              | X            |              |              | X            |
| Peripheral vascular disease    | Male   | pulses legumes adjusted(g)                     |              |              | X            |              |              | X            |
| Peripheral vascular disease    | Female | pufa adjusted(percent)                         |              |              | X            |              |              | X            |
| Peripheral vascular disease    | Male   | Healthcare access and quality index            |              | X            |              |              | X            |              |
| Peripheral vascular disease    | Male   | Smoking Prevalence                             | X            |              |              | X            |              |              |
| Peripheral vascular disease    | Male   | LDI (I\$ per capita)                           |              |              | X            |              |              | X            |
| Peripheral vascular disease    | Male   | Systemic Blood Pressure (mmHg)                 | X            |              |              | X            |              |              |
| Peripheral vascular disease    | Female | Cholesterol (total, mean per capita)           | X            |              |              | X            |              |              |
| Peripheral vascular disease    | Female | Systemic Blood Pressure (mmHg)                 | X            |              |              | X            |              |              |
| Peripheral vascular disease    | Male   | Cholesterol (total, mean per capita)           | X            |              |              | X            |              |              |
| Peripheral vascular disease    | Female | Socio-demographic Index                        |              |              | X            |              |              | X            |
| Peripheral vascular disease    | Male   | Socio-demographic Index                        |              |              | X            |              |              | X            |
| Peripheral vascular disease    | Female | Mean BMI                                       |              | X            |              |              | X            |              |
| Peripheral vascular disease    | Male   | Mean BMI                                       |              | X            |              |              | X            |              |
| Peripheral vascular disease    | Female | Healthcare access and quality index            |              | X            |              |              | X            |              |
| Peripheral vascular disease    | Female | Alcohol (liters per capita)                    |              |              | X            |              |              | X            |
| Peripheral vascular disease    | Male   | Alcohol (liters per capita)                    |              |              | X            |              |              | X            |
| Peripheral vascular disease    | Female | LDI (I\$ per capita)                           |              |              | X            |              |              | X            |
| Endocarditis                   | Female | Healthcare access and quality index            | X            |              |              | X            |              |              |
| Endocarditis                   | Female | LDI (I\$ per capita)                           |              |              | X            |              |              | X            |
| Endocarditis                   | Male   | Healthcare access and quality index            | X            |              |              | X            |              |              |
| Endocarditis                   | Female | Socio-demographic Index                        |              |              | X            |              |              | X            |
| Endocarditis                   | Male   | Socio-demographic Index                        |              |              | X            |              |              | X            |
| Endocarditis                   | Female | Sanitation (proportion with access)            | X            |              |              | X            |              |              |
| Endocarditis                   | Male   | Sanitation (proportion with access)            | X            |              |              | X            |              |              |
| Endocarditis                   | Female | Improved Water Source (proportion with access) | X            |              |              | X            |              |              |

Appendix Table 10: Comparison of GBD 2016 and GBD 2017 covariates and level of covariates used in cause of death modeling

| Cause                                         | Sex    | Covariate                                              | Level 1 2017 | Level 2 2017 | Level 3 2017 | Level 1 2016 | Level 2 2016 | Level 3 2016 |
|-----------------------------------------------|--------|--------------------------------------------------------|--------------|--------------|--------------|--------------|--------------|--------------|
| Endocarditis                                  | Male   | Improved Water Source (proportion with access)         | X            |              |              | X            |              |              |
| Endocarditis                                  | Female | Log-transformed SEV scalar: Endocar                    | X            |              |              | X            |              |              |
| Endocarditis                                  | Male   | Log-transformed SEV scalar: Endocar                    | X            |              |              | X            |              |              |
| Endocarditis                                  | Female | LDI (IS per capita)                                    |              |              | X            |              |              | X            |
| Other cardiovascular and circulatory diseases | Male   | Log-transformed SEV scalar: Oth Cardio                 | X            |              |              | X            |              |              |
| Other cardiovascular and circulatory diseases | Male   | Log-transformed SEV scalar: Oth Cardio                 | X            |              |              | X            |              |              |
| Other cardiovascular and circulatory diseases | Female | Healthcare access and quality index                    |              | X            |              |              | X            |              |
| Other cardiovascular and circulatory diseases | Male   | Healthcare access and quality index                    |              | X            |              |              | X            |              |
| Other cardiovascular and circulatory diseases | Female | Elevation Over 1500m (proportion)                      |              | X            |              |              | X            |              |
| Other cardiovascular and circulatory diseases | Male   | Elevation Over 1500m (proportion)                      |              | X            |              |              | X            |              |
| Other cardiovascular and circulatory diseases | Female | Mean BMI                                               |              | X            |              |              | X            |              |
| Other cardiovascular and circulatory diseases | Male   | LDI (IS per capita)                                    |              |              | X            |              |              | X            |
| Other cardiovascular and circulatory diseases | Female | vegetables adjusted(g)                                 |              | X            |              |              |              | X            |
| Other cardiovascular and circulatory diseases | Male   | vegetables adjusted(g)                                 |              | X            |              |              |              | X            |
| Other cardiovascular and circulatory diseases | Female | pulses legumes adjusted(g)                             |              | X            |              |              |              | X            |
| Other cardiovascular and circulatory diseases | Male   | pulses legumes adjusted(g)                             |              | X            |              |              |              | X            |
| Other cardiovascular and circulatory diseases | Female | pufa adjusted(percent)                                 |              | X            |              |              |              | X            |
| Other cardiovascular and circulatory diseases | Male   | pufa adjusted(percent)                                 |              | X            |              |              |              | X            |
| Other cardiovascular and circulatory diseases | Female | nuts seeds adjusted(g)                                 |              | X            |              |              |              | X            |
| Other cardiovascular and circulatory diseases | Male   | nuts seeds adjusted(g)                                 |              | X            |              |              |              | X            |
| Other cardiovascular and circulatory diseases | Female | fruits adjusted(g)                                     |              | X            |              |              |              | X            |
| Other cardiovascular and circulatory diseases | Male   | fruits adjusted(g)                                     |              | X            |              |              |              | X            |
| Other cardiovascular and circulatory diseases | Female | omega 3 adjusted(g)                                    |              | X            |              |              |              | X            |
| Other cardiovascular and circulatory diseases | Male   | omega 3 adjusted(g)                                    |              | X            |              |              |              | X            |
| Other cardiovascular and circulatory diseases | Female | Smoking Prevalence                                     | X            |              |              | X            |              |              |
| Other cardiovascular and circulatory diseases | Male   | Smoking Prevalence                                     | X            |              |              | X            |              |              |
| Other cardiovascular and circulatory diseases | Female | Outdoor Air Pollution (PM2.5)                          |              | X            |              |              | X            |              |
| Other cardiovascular and circulatory diseases | Male   | Outdoor Air Pollution (PM2.5)                          |              | X            |              |              | X            |              |
| Other cardiovascular and circulatory diseases | Female | Indoor Air Pollution (All Cooking Fuels)               |              | X            |              |              | X            |              |
| Other cardiovascular and circulatory diseases | Male   | Indoor Air Pollution (All Cooking Fuels)               |              | X            |              |              | X            |              |
| Other cardiovascular and circulatory diseases | Female | Systemic Blood Pressure (mmHg)                         | X            |              |              | X            |              |              |
| Other cardiovascular and circulatory diseases | Male   | Systemic Blood Pressure (mmHg)                         | X            |              |              | X            |              |              |
| Other cardiovascular and circulatory diseases | Female | Cholesterol (total, mean per capita)                   | X            |              |              | X            |              |              |
| Other cardiovascular and circulatory diseases | Male   | Cholesterol (total, mean per capita)                   | X            |              |              | X            |              |              |
| Other cardiovascular and circulatory diseases | Female | Diabetes Fasting Plasma Glucose (mmol/L)               |              | X            |              |              | X            |              |
| Other cardiovascular and circulatory diseases | Male   | Diabetes Fasting Plasma Glucose (mmol/L)               |              | X            |              |              | X            |              |
| Other cardiovascular and circulatory diseases | Female | Socio-demographic Index                                |              |              | X            |              |              | X            |
| Other cardiovascular and circulatory diseases | Male   | Socio-demographic Index                                |              |              | X            |              |              | X            |
| Other cardiovascular and circulatory diseases | Female | LDI (IS per capita)                                    |              |              | X            |              |              | X            |
| Other cardiovascular and circulatory diseases | Male   | pulses legumes adjusted(g)                             |              |              | X            |              |              | X            |
| Other cardiovascular and circulatory diseases | Female | Alcohol (liters per capita)                            |              |              | X            |              |              | X            |
| Other cardiovascular and circulatory diseases | Male   | Alcohol (liters per capita)                            |              |              | X            |              |              | X            |
| Chronic respiratory diseases                  | Male   | Indoor Air Pollution (All Cooking Fuels)               | X            |              |              | X            |              |              |
| Chronic respiratory diseases                  | Female | Smoking Prevalence                                     |              | X            |              |              | X            |              |
| Chronic respiratory diseases                  | Male   | Smoking Prevalence                                     |              | X            |              |              | X            |              |
| Chronic respiratory diseases                  | Female | Smoking Prevalence                                     |              | X            |              |              | X            |              |
| Chronic respiratory diseases                  | Male   | Smoking Prevalence                                     | X            |              |              | X            |              |              |
| Chronic respiratory diseases                  | Female | Indoor Air Pollution (All Cooking Fuels)               |              | X            |              |              | X            |              |
| Chronic respiratory diseases                  | Male   | Indoor Air Pollution (All Cooking Fuels)               |              | X            |              |              | X            |              |
| Chronic respiratory diseases                  | Female | Indoor Air Pollution (All Cooking Fuels)               | X            |              |              |              | X            |              |
| Chronic respiratory diseases                  | Male   | Indoor Air Pollution (All Cooking Fuels)               | X            |              |              |              | X            |              |
| Chronic respiratory diseases                  | Female | Outdoor Air Pollution (PM2.5)                          |              | X            |              |              | X            |              |
| Chronic respiratory diseases                  | Male   | Outdoor Air Pollution (PM2.5)                          |              | X            |              |              | X            |              |
| Chronic respiratory diseases                  | Female | Socio-demographic Index                                |              |              | X            |              |              | X            |
| Chronic respiratory diseases                  | Male   | Cumulative Cigarettes (10 Years)                       | X            |              |              | X            |              |              |
| Chronic respiratory diseases                  | Female | Healthcare access and quality index                    | X            |              |              | X            |              |              |
| Chronic respiratory diseases                  | Male   | Healthcare access and quality index                    |              | X            |              |              | X            |              |
| Chronic respiratory diseases                  | Female | Population Density (over 1000 ppl/sqkm, proportion)    |              |              | X            |              |              | X            |
| Chronic respiratory diseases                  | Male   | Population Density (over 1000 ppl/sqkm, proportion)    |              |              | X            |              |              | X            |
| Chronic respiratory diseases                  | Female | Elevation Over 1500m (proportion)                      |              | X            |              |              | X            |              |
| Chronic respiratory diseases                  | Male   | Elevation Over 1500m (proportion)                      |              | X            |              |              | X            |              |
| Chronic respiratory diseases                  | Female | LDI (IS per capita)                                    |              |              | X            |              |              | X            |
| Chronic respiratory diseases                  | Male   | LDI (IS per capita)                                    |              |              | X            |              |              | X            |
| Chronic respiratory diseases                  | Female | Education (years per capita)                           |              |              | X            |              |              | X            |
| Chronic respiratory diseases                  | Male   | Education (years per capita)                           |              |              | X            |              |              | X            |
| Chronic respiratory diseases                  | Female | Socio-demographic Index                                |              |              | X            |              |              | X            |
| Chronic respiratory diseases                  | Male   | Cumulative Cigarettes (5 Years)                        | X            |              |              | X            |              |              |
| Chronic respiratory diseases                  | Female | Cumulative Cigarettes (10 Years)                       | X            |              |              | X            |              |              |
| Chronic respiratory diseases                  | Male   | Cumulative Cigarettes (5 Years)                        | X            |              |              | X            |              |              |
| Chronic respiratory diseases                  | Female | Elevation 500 to 1500m (proportion)                    |              |              | X            |              |              | X            |
| Chronic respiratory diseases                  | Male   | Elevation 500 to 1500m (proportion)                    |              |              | X            |              |              | X            |
| Chronic respiratory diseases                  | Female | Log-transformed SEV scalar: Chr Resp                   | X            |              |              | X            |              |              |
| Chronic respiratory diseases                  | Male   | Log-transformed SEV scalar: Chr Resp                   | X            |              |              | X            |              |              |
| Chronic obstructive pulmonary disease         | Female | Log-transformed SEV scalar: COPD                       | X            |              |              | X            |              |              |
| Chronic obstructive pulmonary disease         | Male   | Indoor Air Pollution (All Cooking Fuels)               |              | X            |              |              | X            |              |
| Chronic obstructive pulmonary disease         | Female | Outdoor Air Pollution (PM2.5)                          |              | X            |              |              | X            |              |
| Chronic obstructive pulmonary disease         | Male   | Socio-demographic Index                                |              |              | X            |              |              | X            |
| Chronic obstructive pulmonary disease         | Female | Socio-demographic Index                                |              |              | X            |              |              | X            |
| Chronic obstructive pulmonary disease         | Male   | Healthcare access and quality index                    | X            |              |              | X            |              |              |
| Chronic obstructive pulmonary disease         | Female | Healthcare access and quality index                    |              | X            |              |              | X            |              |
| Chronic obstructive pulmonary disease         | Male   | Elevation Over 1500m (proportion)                      | X            |              |              | X            |              |              |
| Chronic obstructive pulmonary disease         | Female | Elevation Over 1500m (proportion)                      | X            |              |              | X            |              |              |
| Chronic obstructive pulmonary disease         | Male   | LDI (IS per capita)                                    |              |              | X            |              |              | X            |
| Chronic obstructive pulmonary disease         | Female | LDI (IS per capita)                                    |              |              | X            |              |              | X            |
| Chronic obstructive pulmonary disease         | Male   | Outdoor Air Pollution (PM2.5)                          |              | X            |              |              | X            |              |
| Chronic obstructive pulmonary disease         | Female | Education (years per capita)                           |              |              | X            |              |              | X            |
| Chronic obstructive pulmonary disease         | Male   | Log-transformed SEV scalar: COPD                       | X            |              |              | X            |              |              |
| Chronic obstructive pulmonary disease         | Female | Cumulative Cigarettes (20 Years)                       | X            |              |              | X            |              |              |
| Chronic obstructive pulmonary disease         | Male   | Cumulative Cigarettes (5 Years)                        | X            |              |              | X            |              |              |
| Chronic obstructive pulmonary disease         | Female | Cumulative Cigarettes (5 Years)                        | X            |              |              | X            |              |              |
| Chronic obstructive pulmonary disease         | Male   | Indoor Air Pollution (All Cooking Fuels)               |              | X            |              |              | X            |              |
| Chronic obstructive pulmonary disease         | Female | Cumulative Cigarettes (10 Years)                       | X            |              |              | X            |              |              |
| Chronic obstructive pulmonary disease         | Male   | Smoking Prevalence                                     |              | X            |              |              | X            |              |
| Chronic obstructive pulmonary disease         | Female | Smoking Prevalence                                     |              | X            |              |              | X            |              |
| Chronic obstructive pulmonary disease         | Male   | Education (years per capita)                           |              |              | X            |              |              | X            |
| Chronic obstructive pulmonary disease         | Female | Cumulative Cigarettes (10 Years)                       | X            |              |              | X            |              |              |
| Pneumoconiosis                                | Male   | Coal Production (per capita)                           | X            |              |              | X            |              |              |
| Pneumoconiosis                                | Female | Coal Production (per capita)                           | X            |              |              | X            |              |              |
| Pneumoconiosis                                | Male   | Asbestos consumption (metric tons per year per capita) | X            |              |              | X            |              |              |
| Pneumoconiosis                                | Female | Asbestos consumption (metric tons per year per capita) | X            |              |              | X            |              |              |
| Pneumoconiosis                                | Male   | Gold production (kg) per capita                        | X            |              |              | X            |              |              |
| Pneumoconiosis                                | Female | Gold production (kg) per capita                        | X            |              |              | X            |              |              |
| Pneumoconiosis                                | Male   | Cumulative Cigarettes (5 Years)                        | X            |              |              | X            |              |              |
| Pneumoconiosis                                | Female | Cumulative Cigarettes (5 Years)                        | X            |              |              | X            |              |              |
| Pneumoconiosis                                | Male   | Smoking Prevalence                                     | X            |              |              | X            |              |              |
| Pneumoconiosis                                | Female | Smoking Prevalence                                     | X            |              |              | X            |              |              |
| Pneumoconiosis                                | Male   | Indoor Air Pollution (All Cooking Fuels)               |              | X            |              |              | X            |              |
| Pneumoconiosis                                | Female | Indoor Air Pollution (All Cooking Fuels)               |              | X            |              |              | X            |              |
| Pneumoconiosis                                | Male   | Socio-demographic Index                                |              |              | X            |              |              | X            |
| Pneumoconiosis                                | Female | Healthcare access and quality index                    | X            |              |              | X            |              |              |
| Pneumoconiosis                                | Male   | Healthcare access and quality index                    |              | X            |              |              | X            |              |
| Pneumoconiosis                                | Female | LDI (IS per capita)                                    |              |              | X            |              |              | X            |
| Pneumoconiosis                                | Male   | LDI (IS per capita)                                    |              |              | X            |              |              | X            |
| Pneumoconiosis                                | Female | Education (years per capita)                           |              |              | X            |              |              | X            |
| Pneumoconiosis                                | Male   | Education (years per capita)                           |              |              | X            |              |              | X            |
| Pneumoconiosis                                | Female | Smoking Prevalence                                     |              | X            |              |              | X            |              |
| Pneumoconiosis                                | Male   | Socio-demographic Index                                |              |              | X            |              |              | X            |
| Silicosis                                     | Female | Socio-demographic Index                                |              |              | X            |              |              | X            |
| Silicosis                                     | Male   | Education (years per capita)                           |              |              | X            |              |              | X            |
| Silicosis                                     | Female | Education (years per capita)                           |              |              | X            |              |              | X            |
| Silicosis                                     | Male   | LDI (IS per capita)                                    |              |              | X            |              |              | X            |
| Silicosis                                     | Female | LDI (IS per capita)                                    |              |              | X            |              |              | X            |
| Silicosis                                     | Male   | Healthcare access and quality index                    |              | X            |              |              | X            |              |
| Silicosis                                     | Female | Gold production (kg) per capita                        | X            |              |              | X            |              |              |

Appendix Table 10: Comparison of GBD 2016 and GBD 2017 covariates and level of covariates used in cause of death modeling

| Cause                                               | Sex    | Covariate                                              | Level 1 2017 | Level 2 2017 | Level 3 2017 | Level 1 2016 | Level 2 2016 | Level 3 2016 |
|-----------------------------------------------------|--------|--------------------------------------------------------|--------------|--------------|--------------|--------------|--------------|--------------|
| Silicosis                                           | Female | Gold production (kg) per capita                        | X            |              |              | X            |              |              |
| Silicosis                                           | Male   | Healthcare access and quality index                    |              | X            |              |              | X            |              |
| Silicosis                                           | Female | Cumulative Cigarettes (5 Years)                        |              | X            |              |              | X            |              |
| Silicosis                                           | Male   | Smoking Prevalence                                     |              | X            |              |              | X            |              |
| Silicosis                                           | Female | Smoking Prevalence                                     |              | X            |              |              | X            |              |
| Silicosis                                           | Male   | Indoor Air Pollution (All Cooking Fuels)               |              | X            |              |              | X            |              |
| Silicosis                                           | Female | Indoor Air Pollution (All Cooking Fuels)               |              | X            |              |              | X            |              |
| Silicosis                                           | Male   | Cumulative Cigarettes (5 Years)                        |              | X            |              |              | X            |              |
| Asbestosis                                          | Male   | Elevation 500 to 1500m (proportion)                    |              | X            |              |              | X            |              |
| Asbestosis                                          | Male   | Smoking Prevalence                                     | X            |              |              | X            |              |              |
| Asbestosis                                          | Female | Cumulative Cigarettes (5 Years)                        |              | X            |              |              | X            |              |
| Asbestosis                                          | Male   | Cumulative Cigarettes (5 Years)                        |              | X            |              |              | X            |              |
| Asbestosis                                          | Female | Elevation 500 to 1500m (proportion)                    |              | X            |              |              | X            |              |
| Asbestosis                                          | Female | Asbestos consumption (metric tons per year per capita) | X            |              |              | X            |              |              |
| Asbestosis                                          | Female | Smoking Prevalence                                     |              | X            |              |              | X            |              |
| Asbestosis                                          | Male   | Indoor Air Pollution (All Cooking Fuels)               |              | X            |              |              | X            |              |
| Asbestosis                                          | Female | Indoor Air Pollution (All Cooking Fuels)               |              | X            |              |              | X            |              |
| Asbestosis                                          | Male   | Socio-demographic Index                                |              |              | X            |              |              | X            |
| Asbestosis                                          | Male   | Asbestos consumption (metric tons per year per capita) | X            |              |              | X            |              |              |
| Asbestosis                                          | Male   | Smoking Prevalence                                     | X            |              |              |              | X            |              |
| Asbestosis                                          | Male   | Healthcare access and quality index                    |              | X            |              |              | X            |              |
| Asbestosis                                          | Male   | Smoking Prevalence                                     |              | X            |              | X            |              |              |
| Asbestosis                                          | Female | Elevation Over 1500m (proportion)                      |              | X            |              |              | X            |              |
| Asbestosis                                          | Female | Socio-demographic Index                                |              |              | X            |              |              | X            |
| Asbestosis                                          | Male   | Smoking Prevalence                                     |              | X            |              |              | X            |              |
| Asbestosis                                          | Male   | Education (years per capita)                           |              |              | X            |              |              | X            |
| Asbestosis                                          | Female | LDI (5 per capita)                                     |              |              | X            |              |              | X            |
| Asbestosis                                          | Male   | LDI (5 per capita)                                     |              |              | X            |              |              | X            |
| Asbestosis                                          | Female | Education (years per capita)                           |              |              | X            |              |              | X            |
| Asbestosis                                          | Male   | Elevation Over 1500m (proportion)                      |              | X            |              |              | X            |              |
| Asbestosis                                          | Female | Healthcare access and quality index                    |              | X            |              |              | X            |              |
| Coal workers pneumoconiosis                         | Male   | Cumulative Cigarettes (5 Years)                        |              | X            |              |              | X            |              |
| Coal workers pneumoconiosis                         | Female | Cumulative Cigarettes (5 Years)                        |              | X            |              |              | X            |              |
| Coal workers pneumoconiosis                         | Male   | Coal Production (per capita)                           | X            |              |              | X            |              |              |
| Coal workers pneumoconiosis                         | Female | Coal Production (per capita)                           | X            |              |              | X            |              |              |
| Coal workers pneumoconiosis                         | Male   | Education (years per capita)                           |              |              | X            |              |              | X            |
| Coal workers pneumoconiosis                         | Female | Education (years per capita)                           |              |              | X            |              |              | X            |
| Coal workers pneumoconiosis                         | Male   | LDI (5 per capita)                                     |              |              | X            |              |              | X            |
| Coal workers pneumoconiosis                         | Female | LDI (5 per capita)                                     |              |              | X            |              |              | X            |
| Coal workers pneumoconiosis                         | Male   | Healthcare access and quality index                    |              | X            |              |              | X            |              |
| Coal workers pneumoconiosis                         | Female | Indoor Air Pollution (All Cooking Fuels)               |              | X            |              |              | X            |              |
| Coal workers pneumoconiosis                         | Male   | Socio-demographic Index                                |              |              | X            |              |              | X            |
| Coal workers pneumoconiosis                         | Female | Socio-demographic Index                                |              |              | X            |              |              | X            |
| Coal workers pneumoconiosis                         | Male   | Indoor Air Pollution (All Cooking Fuels)               |              | X            |              |              | X            |              |
| Coal workers pneumoconiosis                         | Female | Healthcare access and quality index                    |              | X            |              |              | X            |              |
| Coal workers pneumoconiosis                         | Male   | Smoking Prevalence                                     |              | X            |              |              | X            |              |
| Coal workers pneumoconiosis                         | Female | Smoking Prevalence                                     |              | X            |              |              | X            |              |
| Coal workers pneumoconiosis                         | Male   | Healthcare access and quality index                    |              | X            |              |              | X            |              |
| Other pneumoconiosis                                | Female | LDI (5 per capita)                                     |              |              | X            |              |              | X            |
| Other pneumoconiosis                                | Male   | Indoor Air Pollution (All Cooking Fuels)               |              | X            |              |              | X            |              |
| Other pneumoconiosis                                | Female | Indoor Air Pollution (All Cooking Fuels)               |              | X            |              |              | X            |              |
| Other pneumoconiosis                                | Male   | Smoking Prevalence                                     |              | X            |              |              | X            |              |
| Other pneumoconiosis                                | Male   | Socio-demographic Index                                |              |              | X            |              |              | X            |
| Other pneumoconiosis                                | Female | Smoking Prevalence                                     |              | X            |              |              | X            |              |
| Other pneumoconiosis                                | Male   | Cumulative Cigarettes (5 Years)                        |              | X            |              |              | X            |              |
| Other pneumoconiosis                                | Female | Cumulative Cigarettes (5 Years)                        |              | X            |              |              | X            |              |
| Other pneumoconiosis                                | Male   | LDI (5 per capita)                                     |              |              | X            |              |              | X            |
| Other pneumoconiosis                                | Female | Socio-demographic Index                                |              |              | X            |              |              | X            |
| Other pneumoconiosis                                | Female | Healthcare access and quality index                    |              | X            |              |              | X            |              |
| Other pneumoconiosis                                | Female | Education (years per capita)                           |              |              | X            |              |              | X            |
| Other pneumoconiosis                                | Male   | Education (years per capita)                           |              |              | X            |              |              | X            |
| Asthma                                              | Male   | Outdoor Air Pollution (PM2.5)                          |              | X            |              |              | X            |              |
| Asthma                                              | Female | Indoor Air Pollution (All Cooking Fuels)               |              | X            |              |              | X            |              |
| Asthma                                              | Female | Outdoor Air Pollution (PM2.5)                          |              | X            |              |              | X            |              |
| Asthma                                              | Female | Smoking Prevalence                                     |              | X            |              |              | X            |              |
| Asthma                                              | Male   | Smoking Prevalence                                     |              | X            |              |              | X            |              |
| Asthma                                              | Female | Cumulative Cigarettes (10 Years)                       | X            |              |              | X            |              |              |
| Asthma                                              | Female | Education (years per capita)                           |              |              | X            |              |              | X            |
| Asthma                                              | Male   | Log-transformed SEV scalar: Asthma                     | X            |              |              | X            |              |              |
| Asthma                                              | Female | Log-transformed SEV scalar: Asthma                     | X            |              |              | X            |              |              |
| Asthma                                              | Male   | LDI (5 per capita)                                     |              |              | X            |              |              | X            |
| Asthma                                              | Female | Healthcare access and quality index                    |              | X            |              |              | X            |              |
| Asthma                                              | Male   | Healthcare access and quality index                    |              | X            |              |              | X            |              |
| Asthma                                              | Female | Socio-demographic Index                                |              |              | X            |              |              | X            |
| Asthma                                              | Male   | Socio-demographic Index                                |              |              | X            |              |              | X            |
| Asthma                                              | Male   | Cumulative Cigarettes (10 Years)                       | X            |              |              | X            |              |              |
| Asthma                                              | Female | Cumulative Cigarettes (5 Years)                        | X            |              |              | X            |              |              |
| Asthma                                              | Male   | Cumulative Cigarettes (5 Years)                        | X            |              |              | X            |              |              |
| Asthma                                              | Female | LDI (5 per capita)                                     |              |              | X            |              |              | X            |
| Asthma                                              | Male   | Education (years per capita)                           |              |              | X            |              |              | X            |
| Asthma                                              | Male   | Indoor Air Pollution (All Cooking Fuels)               |              | X            |              |              | X            |              |
| Interstitial lung disease and pulmonary sarcoidosis | Female | Education (years per capita)                           |              |              | X            |              |              | X            |
| Interstitial lung disease and pulmonary sarcoidosis | Female | Indoor Air Pollution (All Cooking Fuels)               |              | X            |              |              | X            |              |
| Interstitial lung disease and pulmonary sarcoidosis | Male   | Indoor Air Pollution (All Cooking Fuels)               |              | X            |              |              | X            |              |
| Interstitial lung disease and pulmonary sarcoidosis | Female | Smoking Prevalence                                     | X            |              |              | X            |              |              |
| Interstitial lung disease and pulmonary sarcoidosis | Male   | Smoking Prevalence                                     | X            |              |              | X            |              |              |
| Interstitial lung disease and pulmonary sarcoidosis | Female | Cumulative Cigarettes (5 Years)                        | X            |              |              | X            |              |              |
| Interstitial lung disease and pulmonary sarcoidosis | Male   | Cumulative Cigarettes (5 Years)                        | X            |              |              | X            |              |              |
| Interstitial lung disease and pulmonary sarcoidosis | Female | Log-transformed SEV scalar:ILD                         | X            |              |              | X            |              |              |
| Interstitial lung disease and pulmonary sarcoidosis | Male   | Log-transformed SEV scalar:ILD                         | X            |              |              | X            |              |              |
| Interstitial lung disease and pulmonary sarcoidosis | Female | Indoor Air Pollution (All Cooking Fuels)               |              | X            |              |              | X            |              |
| Interstitial lung disease and pulmonary sarcoidosis | Female | Indoor Air Pollution (All Cooking Fuels)               |              | X            |              |              | X            |              |
| Interstitial lung disease and pulmonary sarcoidosis | Male   | Outdoor Air Pollution (PM2.5)                          |              | X            |              |              | X            |              |
| Interstitial lung disease and pulmonary sarcoidosis | Female | Indoor Air Pollution (All Cooking Fuels)               | X            |              |              | X            |              |              |
| Interstitial lung disease and pulmonary sarcoidosis | Female | Outdoor Air Pollution (PM2.5)                          |              | X            |              |              | X            |              |
| Interstitial lung disease and pulmonary sarcoidosis | Male   | Education (years per capita)                           |              |              | X            |              |              | X            |
| Interstitial lung disease and pulmonary sarcoidosis | Female | LDI (5 per capita)                                     |              |              | X            |              |              | X            |
| Interstitial lung disease and pulmonary sarcoidosis | Male   | LDI (5 per capita)                                     |              |              | X            |              |              | X            |
| Interstitial lung disease and pulmonary sarcoidosis | Female | Healthcare access and quality index                    |              | X            |              |              | X            |              |
| Interstitial lung disease and pulmonary sarcoidosis | Male   | Healthcare access and quality index                    |              | X            |              |              | X            |              |
| Interstitial lung disease and pulmonary sarcoidosis | Female | Socio-demographic Index                                |              |              | X            |              |              | X            |
| Interstitial lung disease and pulmonary sarcoidosis | Female | Outdoor Air Pollution (PM2.5)                          |              | X            |              |              | X            |              |
| Interstitial lung disease and pulmonary sarcoidosis | Male   | Outdoor Air Pollution (PM2.5)                          | X            |              |              | X            |              |              |
| Other chronic respiratory diseases                  | Male   | Elevation Over 1500m (proportion)                      |              | X            |              |              | X            |              |
| Other chronic respiratory diseases                  | Female | Elevation Over 1500m (proportion)                      |              | X            |              |              | X            |              |
| Other chronic respiratory diseases                  | Female | Smoking Prevalence                                     | X            |              |              | X            |              |              |
| Other chronic respiratory diseases                  | Female | Cumulative Cigarettes (5 Years)                        | X            |              |              | X            |              |              |
| Other chronic respiratory diseases                  | Female | Population Density (over 1000 ppl/sqkm, proportion)    |              | X            |              |              | X            |              |
| Other chronic respiratory diseases                  | Male   | Population Density (over 1000 ppl/sqkm, proportion)    |              | X            |              |              | X            |              |
| Other chronic respiratory diseases                  | Male   | Socio-demographic Index                                |              |              | X            |              |              | X            |
| Other chronic respiratory diseases                  | Male   | Healthcare access and quality index                    |              | X            |              |              | X            |              |
| Other chronic respiratory diseases                  | Female | Socio-demographic Index                                |              |              | X            |              |              | X            |
| Other chronic respiratory diseases                  | Male   | Cumulative Cigarettes (5 Years)                        | X            |              |              | X            |              |              |
| Other chronic respiratory diseases                  | Female | Outdoor Air Pollution (PM2.5)                          | X            |              |              | X            |              |              |
| Other chronic respiratory diseases                  | Male   | Outdoor Air Pollution (PM2.5)                          | X            |              |              | X            |              |              |
| Other chronic respiratory diseases                  | Female | Indoor Air Pollution (All Cooking Fuels)               | X            |              |              | X            |              |              |
| Other chronic respiratory diseases                  | Female | Healthcare access and quality index                    |              | X            |              |              | X            |              |
| Other chronic respiratory diseases                  | Female | Elevation 500 to 1500m (proportion)                    |              | X            |              |              | X            |              |
| Other chronic respiratory diseases                  | Female | Smoking Prevalence                                     | X            |              |              | X            |              |              |
| Other chronic respiratory diseases                  | Female | Log-transformed SEV scalar: Oh Resp                    | X            |              |              | X            |              |              |
| Other chronic respiratory diseases                  | Male   | Log-transformed SEV scalar: Oh Resp                    | X            |              |              | X            |              |              |
| Other chronic respiratory diseases                  | Male   | LDI (5 per capita)                                     |              |              | X            |              |              | X            |
| Other chronic respiratory diseases                  | Female | LDI (5 per capita)                                     |              |              | X            |              |              | X            |

Appendix Table 10: Comparison of GBD 2016 and GBD 2017 covariates and level of covariates used in cause of death modeling

| Cause                                      | Sex    | Covariate                                         | Level 1 2017 | Level 2 2017 | Level 3 2017 | Level 1 2016 | Level 2 2016 | Level 3 2016 |
|--------------------------------------------|--------|---------------------------------------------------|--------------|--------------|--------------|--------------|--------------|--------------|
| Other chronic respiratory diseases         | Male   | Education (years per capita)                      |              |              | X            |              |              | X            |
| Other chronic respiratory diseases         | Female | Education (years per capita)                      |              |              | X            |              |              | X            |
| Other chronic respiratory diseases         | Male   | Indoor Air Pollution (A3 Cooking Fuel)            | X            |              |              | X            |              |              |
| Other chronic respiratory diseases         | Male   | Elevation 500 to 1500m (proportion)               |              | X            |              |              | X            |              |
| Cirrhosis and other chronic liver diseases | Male   | Alcohol (liters per capita)                       | X            |              |              | X            |              |              |
| Cirrhosis and other chronic liver diseases | Female | Alcohol (liters per capita)                       | X            |              |              | X            |              |              |
| Cirrhosis and other chronic liver diseases | Male   | Education (years per capita)                      |              |              | X            |              |              | X            |
| Cirrhosis and other chronic liver diseases | Female | Education (years per capita)                      |              |              | X            |              |              | X            |
| Cirrhosis and other chronic liver diseases | Male   | LDI (5 per capita)                                |              |              | X            |              |              | X            |
| Cirrhosis and other chronic liver diseases | Female | LDI (5 per capita)                                |              |              | X            |              |              | X            |
| Cirrhosis and other chronic liver diseases | Male   | Healthcare access and quality index               |              | X            |              |              | X            |              |
| Cirrhosis and other chronic liver diseases | Female | Healthcare access and quality index               |              | X            |              |              | X            |              |
| Cirrhosis and other chronic liver diseases | Female | Hepatitis C (IgG) Seroprevalence                  | X            |              |              | X            |              |              |
| Cirrhosis and other chronic liver diseases | Male   | Hepatitis C (IgG) Seroprevalence                  | X            |              |              | X            |              |              |
| Cirrhosis and other chronic liver diseases | Female | Hepatitis B (HbSAg) Seroprevalence                | X            |              |              | X            |              |              |
| Cirrhosis and other chronic liver diseases | Male   | Hepatitis B (HbSAg) Seroprevalence                | X            |              |              | X            |              |              |
| Cirrhosis and other chronic liver diseases | Female | Socio-demographic Index                           |              |              | X            |              |              | X            |
| Cirrhosis and other chronic liver diseases | Female | Schistosomiasis Prevalence (proportion)           | X            |              |              | X            |              |              |
| Cirrhosis and other chronic liver diseases | Male   | Diabetes Age-Standardized Prevalence (proportion) |              | X            |              |              | X            |              |
| Cirrhosis and other chronic liver diseases | Female | Diabetes Age-Standardized Prevalence (proportion) |              | X            |              |              | X            |              |
| Cirrhosis and other chronic liver diseases | Male   | Health System Access 2 (unitless)                 |              |              | X            |              |              | X            |
| Cirrhosis and other chronic liver diseases | Female | Health System Access 2 (unitless)                 |              |              | X            |              |              | X            |
| Cirrhosis and other chronic liver diseases | Male   | Mean BMI                                          |              | X            |              |              | X            |              |
| Cirrhosis and other chronic liver diseases | Female | Mean BMI                                          |              | X            |              |              | X            |              |
| Cirrhosis and other chronic liver diseases | Male   | Schistosomiasis Prevalence (proportion)           | X            |              |              | X            |              |              |
| Cirrhosis and other chronic liver diseases | Male   | Socio-demographic Index                           |              |              | X            |              |              | X            |
| Digestive diseases                         | Female | red meats adjusted(g)                             |              | X            |              |              | X            |              |
| Digestive diseases                         | Male   | Socio-demographic Index                           |              |              | X            |              |              | X            |
| Digestive diseases                         | Male   | Healthcare access and quality index               |              | X            |              |              | X            |              |
| Digestive diseases                         | Male   | LDI (5 per capita)                                |              |              | X            |              |              | X            |
| Digestive diseases                         | Female | Healthcare access and quality index               |              | X            |              |              | X            |              |
| Digestive diseases                         | Male   | Cumulative Cigarettes (5 Years)                   | X            |              |              | X            |              |              |
| Digestive diseases                         | Female | Cumulative Cigarettes (5 Years)                   | X            |              |              | X            |              |              |
| Digestive diseases                         | Male   | Sanitation (proportion with access)               | X            |              |              | X            |              |              |
| Digestive diseases                         | Female | Sanitation (proportion with access)               | X            |              |              | X            |              |              |
| Digestive diseases                         | Male   | fruits adjusted(g)                                |              | X            |              |              | X            |              |
| Digestive diseases                         | Female | Socio-demographic Index                           |              |              | X            |              |              | X            |
| Digestive diseases                         | Male   | red meats adjusted(g)                             |              | X            |              |              | X            |              |
| Digestive diseases                         | Female | Alcohol (liters per capita)                       | X            |              |              | X            |              |              |
| Digestive diseases                         | Male   | Alcohol (liters per capita)                       | X            |              |              | X            |              |              |
| Digestive diseases                         | Female | Education (years per capita)                      |              |              | X            |              |              | X            |
| Digestive diseases                         | Male   | Education (years per capita)                      |              |              | X            |              |              | X            |
| Digestive diseases                         | Female | fruits adjusted(g)                                |              | X            |              |              | X            |              |
| Digestive diseases                         | Female | LDI (5 per capita)                                |              |              | X            |              |              | X            |
| Peptic ulcer disease                       | Male   | SEV unsafe water                                  |              | X            |              |              | X            |              |
| Peptic ulcer disease                       | Female | Maternal Education (years per capita)             |              |              | X            |              |              | X            |
| Peptic ulcer disease                       | Male   | Maternal Education (years per capita)             |              |              | X            |              |              | X            |
| Peptic ulcer disease                       | Female | Cumulative Cigarettes (5 Years)                   | X            |              |              | X            |              |              |
| Peptic ulcer disease                       | Male   | LDI (5 per capita)                                |              |              | X            |              |              | X            |
| Peptic ulcer disease                       | Female | Healthcare access and quality index               |              | X            |              |              | X            |              |
| Peptic ulcer disease                       | Female | LDI (5 per capita)                                |              |              | X            |              |              | X            |
| Peptic ulcer disease                       | Male   | Alcohol (liters per capita)                       | X            |              |              | X            |              |              |
| Peptic ulcer disease                       | Female | Alcohol (liters per capita)                       | X            |              |              | X            |              |              |
| Peptic ulcer disease                       | Female | SEV unsafe water                                  |              | X            |              |              | X            |              |
| Peptic ulcer disease                       | Male   | Cumulative Cigarettes (5 Years)                   | X            |              |              | X            |              |              |
| Peptic ulcer disease                       | Male   | Sanitation (proportion with access)               |              | X            |              |              | X            |              |
| Peptic ulcer disease                       | Female | Sanitation (proportion with access)               |              | X            |              |              | X            |              |
| Peptic ulcer disease                       | Female | Socio-demographic Index                           |              |              | X            |              |              | X            |
| Peptic ulcer disease                       | Male   | Socio-demographic Index                           |              |              | X            |              |              | X            |
| Peptic ulcer disease                       | Female | Smoking Prevalence                                | X            |              |              | X            |              |              |
| Peptic ulcer disease                       | Male   | Smoking Prevalence                                | X            |              |              | X            |              |              |
| Peptic ulcer disease                       | Female | vegetables adjusted(g)                            |              | X            |              |              | X            |              |
| Peptic ulcer disease                       | Male   | vegetables adjusted(g)                            |              | X            |              |              | X            |              |
| Peptic ulcer disease                       | Female | Cumulative Cigarettes (10 Years)                  | X            |              |              | X            |              |              |
| Peptic ulcer disease                       | Male   | Cumulative Cigarettes (10 Years)                  | X            |              |              | X            |              |              |
| Peptic ulcer disease                       | Male   | Healthcare access and quality index               |              | X            |              |              | X            |              |
| Gastritis and duodenitis                   | Male   | SEV unsafe water                                  |              | X            |              |              | X            |              |
| Gastritis and duodenitis                   | Female | Sanitation (proportion with access)               |              | X            |              |              | X            |              |
| Gastritis and duodenitis                   | Male   | Sanitation (proportion with access)               |              | X            |              |              | X            |              |
| Gastritis and duodenitis                   | Female | SEV unsafe water                                  |              | X            |              |              | X            |              |
| Gastritis and duodenitis                   | Male   | Cumulative Cigarettes (5 Years)                   | X            |              |              | X            |              |              |
| Gastritis and duodenitis                   | Male   | Education (years per capita)                      |              |              | X            |              |              | X            |
| Gastritis and duodenitis                   | Male   | Alcohol (liters per capita)                       | X            |              |              | X            |              |              |
| Gastritis and duodenitis                   | Female | Alcohol (liters per capita)                       | X            |              |              | X            |              |              |
| Gastritis and duodenitis                   | Female | Cumulative Cigarettes (5 Years)                   |              |              | X            |              |              | X            |
| Gastritis and duodenitis                   | Female | Education (years per capita)                      |              |              | X            |              |              | X            |
| Gastritis and duodenitis                   | Female | LDI (5 per capita)                                |              |              | X            |              |              | X            |
| Gastritis and duodenitis                   | Male   | Healthcare access and quality index               |              | X            |              |              | X            |              |
| Gastritis and duodenitis                   | Female | Healthcare access and quality index               |              | X            |              |              | X            |              |
| Gastritis and duodenitis                   | Male   | Socio-demographic Index                           |              |              | X            |              |              | X            |
| Gastritis and duodenitis                   | Female | Socio-demographic Index                           |              |              | X            |              |              | X            |
| Gastritis and duodenitis                   | Male   | LDI (5 per capita)                                |              |              | X            |              |              | X            |
| Gastritis and duodenitis                   | Female | Smoking Prevalence                                | X            |              |              | X            |              |              |
| Gastritis and duodenitis                   | Male   | vegetables adjusted(g)                            |              | X            |              |              | X            |              |
| Gastritis and duodenitis                   | Female | vegetables adjusted(g)                            |              | X            |              |              | X            |              |
| Gastritis and duodenitis                   | Male   | Cumulative Cigarettes (10 Years)                  | X            |              |              | X            |              |              |
| Gastritis and duodenitis                   | Female | Cumulative Cigarettes (10 Years)                  | X            |              |              | X            |              |              |
| Gastritis and duodenitis                   | Male   | Smoking Prevalence                                | X            |              |              | X            |              |              |
| Appendicitis                               | Female | Healthcare access and quality index               |              | X            |              |              | X            |              |
| Appendicitis                               | Male   | Healthcare access and quality index               |              | X            |              |              | X            |              |
| Appendicitis                               | Female | LDI (5 per capita)                                |              |              | X            |              |              | X            |
| Appendicitis                               | Male   | LDI (5 per capita)                                |              |              | X            |              |              | X            |
| Appendicitis                               | Female | Education (years per capita)                      |              |              | X            |              |              | X            |
| Appendicitis                               | Male   | Education (years per capita)                      |              |              | X            |              |              | X            |
| Appendicitis                               | Male   | fruits adjusted(g)                                |              | X            |              |              | X            |              |
| Appendicitis                               | Female | Health System Access (capped)                     |              |              | X            |              |              | X            |
| Appendicitis                               | Female | vegetables adjusted(g)                            |              | X            |              |              | X            |              |
| Appendicitis                               | Male   | vegetables adjusted(g)                            |              | X            |              |              | X            |              |
| Appendicitis                               | Female | fruits adjusted(g)                                |              | X            |              |              | X            |              |
| Appendicitis                               | Male   | Socio-demographic Index                           |              |              | X            |              |              | X            |
| Appendicitis                               | Female | Health System Access (capped)                     |              |              | X            |              |              | X            |
| Appendicitis                               | Female | Socio-demographic Index                           |              |              | X            |              |              | X            |
| Paralytic ileus and intestinal obstruction | Male   | vegetables adjusted(g)                            |              | X            |              |              | X            |              |
| Paralytic ileus and intestinal obstruction | Female | fruits adjusted(g)                                |              | X            |              |              | X            |              |
| Paralytic ileus and intestinal obstruction | Male   | fruits adjusted(g)                                |              | X            |              |              | X            |              |
| Paralytic ileus and intestinal obstruction | Female | Health System Access (capped)                     |              |              | X            |              |              | X            |
| Paralytic ileus and intestinal obstruction | Male   | Health System Access (capped)                     |              |              | X            |              |              | X            |
| Paralytic ileus and intestinal obstruction | Female | Socio-demographic Index                           |              |              | X            |              |              | X            |
| Paralytic ileus and intestinal obstruction | Male   | Socio-demographic Index                           |              |              | X            |              |              | X            |
| Paralytic ileus and intestinal obstruction | Female | Healthcare access and quality index               |              | X            |              |              | X            |              |
| Paralytic ileus and intestinal obstruction | Male   | Healthcare access and quality index               |              | X            |              |              | X            |              |
| Paralytic ileus and intestinal obstruction | Female | LDI (5 per capita)                                |              |              | X            |              |              | X            |
| Paralytic ileus and intestinal obstruction | Male   | LDI (5 per capita)                                |              |              | X            |              |              | X            |
| Paralytic ileus and intestinal obstruction | Female | vegetables adjusted(g)                            |              | X            |              |              | X            |              |
| Paralytic ileus and intestinal obstruction | Male   | Education (years per capita)                      |              |              | X            |              |              | X            |
| Paralytic ileus and intestinal obstruction | Female | Education (years per capita)                      |              |              | X            |              |              | X            |
| Inguinal, femoral, and abdominal hernia    | Male   | Socio-demographic Index                           |              |              | X            |              |              | X            |
| Inguinal, femoral, and abdominal hernia    | Female | Socio-demographic Index                           |              |              | X            |              |              | X            |
| Inguinal, femoral, and abdominal hernia    | Female | Healthcare access and quality index               |              | X            |              |              | X            |              |
| Inguinal, femoral, and abdominal hernia    | Male   | LDI (5 per capita)                                |              |              | X            |              |              | X            |
| Inguinal, femoral, and abdominal hernia    | Female | LDI (5 per capita)                                |              |              | X            |              |              | X            |
| Inguinal, femoral, and abdominal hernia    | Male   | Education (years per capita)                      |              |              | X            |              |              | X            |
| Inguinal, femoral, and abdominal hernia    | Female | Education (years per capita)                      |              |              | X            |              |              | X            |
| Inguinal, femoral, and abdominal hernia    | Male   | Healthcare access and quality index               |              | X            |              |              | X            |              |
| Inflammatory bowel disease                 | Male   | saturated fats adjusted(percent)                  | X            |              |              | X            |              |              |
| Inflammatory bowel disease                 | Female | red meats adjusted(g)                             | X            |              |              | X            |              |              |

Appendix Table 10: Comparison of GBD 2016 and GBD 2017 covariates and level of covariates used in cause of death modeling

| Cause                            | Sex    | Covariate                                         | Level 1 2017 | Level 2 2017 | Level 3 2017 | Level 1 2016 | Level 2 2016 | Level 3 2016 |
|----------------------------------|--------|---------------------------------------------------|--------------|--------------|--------------|--------------|--------------|--------------|
| Inflammatory bowel disease       | Male   | fruits adjusted(g)                                | X            |              |              | X            |              |              |
| Inflammatory bowel disease       | Male   | red meats adjusted(g)                             | X            |              |              | X            |              |              |
| Inflammatory bowel disease       | Female | Socio-demographic Index                           |              |              | X            |              |              | X            |
| Inflammatory bowel disease       | Male   | Socio-demographic Index                           |              |              | X            |              |              | X            |
| Inflammatory bowel disease       | Female | Healthcare access and quality index               |              | X            |              |              | X            |              |
| Inflammatory bowel disease       | Male   | Healthcare access and quality index               |              | X            |              |              | X            |              |
| Inflammatory bowel disease       | Female | LDI (I\$ per capita)                              |              |              | X            |              |              | X            |
| Inflammatory bowel disease       | Male   | vegetables adjusted(g)                            | X            |              |              | X            |              |              |
| Inflammatory bowel disease       | Male   | LDI (I\$ per capita)                              |              |              | X            |              |              | X            |
| Inflammatory bowel disease       | Female | Latitude Over 45 (proportion)                     |              | X            |              |              | X            |              |
| Inflammatory bowel disease       | Male   | Latitude Over 45 (proportion)                     |              | X            |              |              | X            |              |
| Inflammatory bowel disease       | Female | Latitude 30 to 45 (proportion)                    |              | X            |              |              | X            |              |
| Inflammatory bowel disease       | Male   | Latitude 30 to 45 (proportion)                    |              | X            |              |              | X            |              |
| Inflammatory bowel disease       | Female | Latitude 15 to 30 (proportion)                    |              | X            |              |              | X            |              |
| Inflammatory bowel disease       | Male   | Latitude 15 to 30 (proportion)                    |              | X            |              |              | X            |              |
| Inflammatory bowel disease       | Female | saturated fats adjusted(percentage)               | X            |              |              | X            |              |              |
| Inflammatory bowel disease       | Female | Education (years per capita)                      |              |              | X            |              |              | X            |
| Inflammatory bowel disease       | Female | vegetables adjusted(g)                            | X            |              |              | X            |              |              |
| Inflammatory bowel disease       | Female | fruits adjusted(g)                                | X            |              |              | X            |              |              |
| Vascular intestinal disorders    | Female | Education (years per capita)                      |              |              | X            |              |              | X            |
| Vascular intestinal disorders    | Female | Socio-demographic Index                           |              |              | X            |              |              | X            |
| Vascular intestinal disorders    | Male   | Diabetes Age-Standardized Prevalence (proportion) | X            |              |              | X            |              |              |
| Vascular intestinal disorders    | Female | Diabetes Age-Standardized Prevalence (proportion) | X            |              |              | X            |              |              |
| Vascular intestinal disorders    | Male   | Healthcare access and quality index               |              | X            |              |              | X            |              |
| Vascular intestinal disorders    | Female | Healthcare access and quality index               |              | X            |              |              | X            |              |
| Vascular intestinal disorders    | Male   | LDI (I\$ per capita)                              |              |              | X            |              |              | X            |
| Vascular intestinal disorders    | Female | LDI (I\$ per capita)                              |              |              | X            |              |              | X            |
| Vascular intestinal disorders    | Male   | Education (years per capita)                      |              |              | X            |              |              | X            |
| Vascular intestinal disorders    | Male   | Alcohol (liters per capita)                       |              | X            |              |              | X            |              |
| Vascular intestinal disorders    | Female | Alcohol (liters per capita)                       |              | X            |              |              | X            |              |
| Vascular intestinal disorders    | Female | Cholesterol (total, mean per capita)              | X            |              |              | X            |              |              |
| Vascular intestinal disorders    | Male   | Cholesterol (total, mean per capita)              | X            |              |              | X            |              |              |
| Vascular intestinal disorders    | Female | Systemic Blood Pressure (mmHg)                    | X            |              |              | X            |              |              |
| Vascular intestinal disorders    | Male   | Systemic Blood Pressure (mmHg)                    | X            |              |              | X            |              |              |
| Vascular intestinal disorders    | Female | fruits adjusted(g)                                |              | X            |              |              | X            |              |
| Vascular intestinal disorders    | Male   | Socio-demographic Index                           |              | X            |              |              |              | X            |
| Vascular intestinal disorders    | Female | Diabetes Fasting Plasma Glucose (mmol/L)          | X            |              |              | X            |              |              |
| Vascular intestinal disorders    | Male   | Latitude Over 45 (proportion)                     |              |              | X            |              |              | X            |
| Vascular intestinal disorders    | Male   | Diabetes Fasting Plasma Glucose (mmol/L)          | X            |              |              | X            |              |              |
| Vascular intestinal disorders    | Female | Latitude Over 45 (proportion)                     |              |              | X            |              |              | X            |
| Vascular intestinal disorders    | Male   | saturated fats adjusted(percentage)               | X            |              |              | X            |              |              |
| Vascular intestinal disorders    | Female | saturated fats adjusted(percentage)               | X            |              |              | X            |              |              |
| Vascular intestinal disorders    | Male   | fruits adjusted(g)                                |              | X            |              |              | X            |              |
| Vascular intestinal disorders    | Female | vegetables adjusted(g)                            |              | X            |              |              | X            |              |
| Vascular intestinal disorders    | Male   | vegetables adjusted(g)                            |              | X            |              |              | X            |              |
| Gallbladder and biliary diseases | Female | red meats adjusted(g)                             |              | X            |              |              | X            |              |
| Gallbladder and biliary diseases | Male   | Socio-demographic Index                           |              |              | X            |              |              | X            |
| Gallbladder and biliary diseases | Male   | saturated fats adjusted(percentage)               | X            |              |              | X            |              |              |
| Gallbladder and biliary diseases | Female | saturated fats adjusted(percentage)               | X            |              |              | X            |              |              |
| Gallbladder and biliary diseases | Female | Socio-demographic Index                           |              |              | X            |              |              | X            |
| Gallbladder and biliary diseases | Male   | LDI (I\$ per capita)                              |              |              | X            |              |              | X            |
| Gallbladder and biliary diseases | Female | Mean BMI                                          | X            |              |              | X            |              |              |
| Gallbladder and biliary diseases | Female | Healthcare access and quality index               |              | X            |              |              | X            |              |
| Gallbladder and biliary diseases | Female | Population Over 65 (proportion)                   |              | X            |              |              | X            |              |
| Gallbladder and biliary diseases | Male   | Population Over 65 (proportion)                   |              | X            |              |              | X            |              |
| Gallbladder and biliary diseases | Female | LDI (I\$ per capita)                              |              |              | X            |              |              | X            |
| Gallbladder and biliary diseases | Male   | Education (years per capita)                      |              |              | X            |              |              | X            |
| Gallbladder and biliary diseases | Female | Education (years per capita)                      |              |              | X            |              |              | X            |
| Gallbladder and biliary diseases | Male   | Healthcare access and quality index               |              | X            |              |              | X            |              |
| Gallbladder and biliary diseases | Female | Alcohol (liters per capita)                       |              | X            |              |              | X            |              |
| Gallbladder and biliary diseases | Male   | red meats adjusted(g)                             |              | X            |              |              | X            |              |
| Gallbladder and biliary diseases | Male   | Health System Access (capped)                     |              | X            |              |              | X            |              |
| Gallbladder and biliary diseases | Male   | Alcohol (liters per capita)                       |              | X            |              |              | X            |              |
| Gallbladder and biliary diseases | Male   | Mean BMI                                          | X            |              |              | X            |              |              |
| Pancreatitis                     | Male   | Healthcare access and quality index               |              | X            |              |              | X            |              |
| Pancreatitis                     | Male   | Log-transformed SEV-scalar: Pancreatitis          | X            |              |              | X            |              |              |
| Pancreatitis                     | Female | Log-transformed SEV-scalar: Pancreatitis          | X            |              |              | X            |              |              |
| Pancreatitis                     | Male   | Health System Access (capped)                     |              | X            |              |              | X            |              |
| Pancreatitis                     | Male   | Socio-demographic Index                           |              |              | X            |              |              | X            |
| Pancreatitis                     | Female | Socio-demographic Index                           |              |              | X            |              |              | X            |
| Pancreatitis                     | Male   | Mean BMI                                          |              | X            |              |              | X            |              |
| Pancreatitis                     | Female | Mean BMI                                          |              | X            |              |              | X            |              |
| Pancreatitis                     | Female | Healthcare access and quality index               |              | X            |              |              | X            |              |
| Pancreatitis                     | Female | LDI (I\$ per capita)                              |              |              | X            |              |              | X            |
| Pancreatitis                     | Female | Alcohol (liters per capita)                       | X            |              |              | X            |              |              |
| Pancreatitis                     | Male   | Alcohol (liters per capita)                       | X            |              |              | X            |              |              |
| Pancreatitis                     | Male   | LDI (I\$ per capita)                              |              |              | X            |              |              | X            |
| Pancreatitis                     | Male   | Education (years per capita)                      |              |              | X            |              |              | X            |
| Pancreatitis                     | Female | Education (years per capita)                      |              |              | X            |              |              | X            |
| Other digestive diseases         | Female | Smoking Prevalence                                | X            |              |              | X            |              |              |
| Other digestive diseases         | Male   | Smoking Prevalence                                | X            |              |              | X            |              |              |
| Other digestive diseases         | Female | red meats adjusted(g)                             |              | X            |              |              | X            |              |
| Other digestive diseases         | Male   | red meats adjusted(g)                             |              | X            |              |              | X            |              |
| Other digestive diseases         | Female | Socio-demographic Index                           |              |              | X            |              |              | X            |
| Other digestive diseases         | Male   | Socio-demographic Index                           |              |              | X            |              |              | X            |
| Other digestive diseases         | Female | Mean BMI                                          |              | X            |              |              | X            |              |
| Other digestive diseases         | Male   | Mean BMI                                          |              | X            |              |              | X            |              |
| Other digestive diseases         | Female | Health System Access 2 (unitless)                 |              |              | X            |              |              | X            |
| Other digestive diseases         | Male   | Health System Access 2 (unitless)                 |              |              | X            |              |              | X            |
| Other digestive diseases         | Male   | fruits adjusted(g)                                |              | X            |              |              | X            |              |
| Other digestive diseases         | Female | Healthcare access and quality index               |              | X            |              |              | X            |              |
| Other digestive diseases         | Male   | Healthcare access and quality index               |              | X            |              |              | X            |              |
| Other digestive diseases         | Female | LDI (I\$ per capita)                              |              |              | X            |              |              | X            |
| Other digestive diseases         | Male   | LDI (I\$ per capita)                              |              |              | X            |              |              | X            |
| Other digestive diseases         | Female | Education (years per capita)                      |              |              | X            |              |              | X            |
| Other digestive diseases         | Male   | Education (years per capita)                      |              |              | X            |              |              | X            |
| Other digestive diseases         | Female | Alcohol (liters per capita)                       | X            |              |              | X            |              |              |
| Other digestive diseases         | Male   | Alcohol (liters per capita)                       | X            |              |              | X            |              |              |
| Other digestive diseases         | Female | Diabetes Age-Standardized Prevalence (proportion) |              | X            |              |              | X            |              |
| Other digestive diseases         | Male   | Diabetes Age-Standardized Prevalence (proportion) |              | X            |              |              | X            |              |
| Other digestive diseases         | Male   | vegetables adjusted(g)                            |              | X            |              |              | X            |              |
| Other digestive diseases         | Female | saturated fats adjusted(percentage)               |              | X            |              |              | X            |              |
| Other digestive diseases         | Female | vegetables adjusted(g)                            |              | X            |              |              | X            |              |
| Other digestive diseases         | Male   | saturated fats adjusted(percentage)               |              | X            |              |              | X            |              |
| Other digestive diseases         | Female | Cumulative Cigarettes (10 Years)                  | X            |              |              | X            |              |              |
| Other digestive diseases         | Male   | Cumulative Cigarettes (10 Years)                  | X            |              |              | X            |              |              |
| Other digestive diseases         | Female | Improved Water Source (proportion with access)    |              | X            |              |              | X            |              |
| Other digestive diseases         | Male   | Improved Water Source (proportion with access)    |              | X            |              |              | X            |              |
| Other digestive diseases         | Female | Sanitation (proportion with access)               |              | X            |              |              | X            |              |
| Other digestive diseases         | Male   | Sanitation (proportion with access)               |              | X            |              |              | X            |              |
| Other digestive diseases         | Female | Cumulative Cigarettes (10 Years)                  | X            |              |              | X            |              |              |
| Other digestive diseases         | Male   | Cumulative Cigarettes (10 Years)                  | X            |              |              | X            |              |              |
| Other digestive diseases         | Female | fruits adjusted(g)                                |              | X            |              |              | X            |              |
| Epilepsy                         | Female | Education (years per capita)                      |              |              | X            |              |              | X            |
| Epilepsy                         | Male   | Cholesterol (total, mean per capita)              |              | X            |              |              | X            |              |
| Epilepsy                         | Female | Socio-demographic Index                           |              |              | X            |              |              | X            |
| Epilepsy                         | Male   | Socio-demographic Index                           |              |              | X            |              |              | X            |
| Epilepsy                         | Female | Mean BMI                                          |              | X            |              |              | X            |              |
| Epilepsy                         | Male   | Mean BMI                                          |              | X            |              |              | X            |              |
| Epilepsy                         | Female | Healthcare access and quality index               |              | X            |              |              | X            |              |
| Epilepsy                         | Male   | Healthcare access and quality index               |              | X            |              |              | X            |              |
| Epilepsy                         | Female | LDI (I\$ per capita)                              |              |              | X            |              |              | X            |
| Epilepsy                         | Female | Systemic Blood Pressure (mmHg)                    | X            |              |              | X            |              |              |
| Epilepsy                         | Male   | LDI (I\$ per capita)                              |              |              | X            |              |              | X            |

Appendix Table 10: Comparison of GBD 2016 and GBD 2017 covariates and level of covariates used in cause of death modeling

| Cause                        | Sex    | Covariate                                              | Level 1 2017 | Level 2 2017 | Level 3 2017 | Level 1 2016 | Level 2 2016 | Level 3 2016 |
|------------------------------|--------|--------------------------------------------------------|--------------|--------------|--------------|--------------|--------------|--------------|
| Epilepsy                     | Male   | Education (years per capita)                           |              |              | X            |              |              | X            |
| Epilepsy                     | Female | Cholesterol (total, mean per capita)                   |              | X            |              |              | X            |              |
| Epilepsy                     | Male   | Cumulative Cigarettes (10 Years)                       |              |              | X            |              |              | X            |
| Epilepsy                     | Male   | Systolic Blood Pressure (mmHg)                         | X            |              |              | X            |              |              |
| Epilepsy                     | Female | Cumulative Cigarettes (5 Years)                        |              |              | X            |              |              | X            |
| Epilepsy                     | Male   | Pigs (per capita)                                      | X            |              |              | X            |              |              |
| Epilepsy                     | Female | Pigs (per capita)                                      | X            |              |              | X            |              |              |
| Epilepsy                     | Male   | Log-transformed SEV scalar: Epilepsy                   | X            |              |              | X            |              |              |
| Epilepsy                     | Female | Cumulative Cigarettes (10 Years)                       |              |              | X            |              |              | X            |
| Epilepsy                     | Male   | Cumulative Cigarettes (5 Years)                        |              |              | X            |              |              | X            |
| Epilepsy                     | Male   | Pig Meat (kg per capita)                               | X            |              |              | X            |              |              |
| Epilepsy                     | Female | Pig Meat (kg per capita)                               | X            |              |              | X            |              |              |
| Epilepsy                     | Female | Log-transformed SEV scalar: Epilepsy                   | X            |              |              | X            |              |              |
| Multiple sclerosis           | Male   | Cumulative Cigarettes (10 Years)                       |              |              | X            |              |              | X            |
| Multiple sclerosis           | Female | Cumulative Cigarettes (10 Years)                       |              |              | X            |              |              | X            |
| Multiple sclerosis           | Male   | Smoking Prevalence                                     |              |              | X            |              |              | X            |
| Multiple sclerosis           | Female | Smoking Prevalence                                     |              |              | X            |              |              | X            |
| Multiple sclerosis           | Male   | Education (years per capita)                           |              |              | X            |              |              | X            |
| Multiple sclerosis           | Female | Cumulative Cigarettes (5 Years)                        |              |              | X            |              |              | X            |
| Multiple sclerosis           | Female | Cholesterol (total, mean per capita)                   |              | X            |              |              | X            |              |
| Multiple sclerosis           | Male   | Socio-demographic Index                                |              |              | X            |              |              | X            |
| Multiple sclerosis           | Female | Socio-demographic Index                                |              |              | X            |              |              | X            |
| Multiple sclerosis           | Male   | Cholesterol (total, mean per capita)                   |              | X            |              |              | X            |              |
| Multiple sclerosis           | Male   | Cumulative Cigarettes (5 Years)                        |              |              | X            |              |              | X            |
| Multiple sclerosis           | Female | Healthcare access and quality index                    |              | X            |              |              | X            |              |
| Multiple sclerosis           | Male   | Absolute value of average latitude                     | X            |              |              | X            |              |              |
| Multiple sclerosis           | Male   | LDI (IS per capita)                                    |              |              | X            |              |              | X            |
| Multiple sclerosis           | Female | LDI (IS per capita)                                    |              |              | X            |              |              | X            |
| Multiple sclerosis           | Male   | Healthcare access and quality index                    |              | X            |              |              | X            |              |
| Multiple sclerosis           | Female | Education (years per capita)                           |              |              | X            |              |              | X            |
| Multiple sclerosis           | Female | Absolute value of average latitude                     | X            |              |              | X            |              |              |
| Motor neuron disease         | Male   | Sanitation (proportion with access)                    |              | X            |              |              | X            |              |
| Motor neuron disease         | Female | Improved Water Source (proportion with access)         |              | X            |              |              | X            |              |
| Motor neuron disease         | Male   | Absolute value of average latitude                     |              | X            |              | X            |              |              |
| Motor neuron disease         | Female | Absolute value of average latitude                     |              | X            |              | X            |              |              |
| Motor neuron disease         | Female | fruits adjusted(g)                                     | X            |              |              | X            |              |              |
| Motor neuron disease         | Male   | Socio-demographic Index                                |              |              | X            |              |              | X            |
| Motor neuron disease         | Female | Education (years per capita)                           |              |              | X            |              |              | X            |
| Motor neuron disease         | Male   | LDI (IS per capita)                                    |              |              | X            |              |              | X            |
| Motor neuron disease         | Female | LDI (IS per capita)                                    |              |              | X            |              |              | X            |
| Motor neuron disease         | Male   | fruits adjusted(g)                                     | X            |              |              | X            |              |              |
| Motor neuron disease         | Female | Cholesterol (total, mean per capita)                   |              | X            |              | X            |              |              |
| Motor neuron disease         | Male   | Healthcare access and quality index                    |              | X            |              |              | X            |              |
| Motor neuron disease         | Male   | Cholesterol (total, mean per capita)                   | X            |              |              | X            |              |              |
| Motor neuron disease         | Female | Socio-demographic Index                                |              |              | X            |              | X            |              |
| Motor neuron disease         | Female | Sanitation (proportion with access)                    |              | X            |              |              | X            |              |
| Motor neuron disease         | Male   | Improved Water Source (proportion with access)         |              | X            |              |              | X            |              |
| Motor neuron disease         | Female | Healthcare access and quality index                    |              | X            |              |              | X            |              |
| Motor neuron disease         | Male   | Education (years per capita)                           |              |              | X            |              |              | X            |
| Other neurological disorders | Male   | fruits adjusted(g)                                     |              | X            |              |              | X            |              |
| Other neurological disorders | Female | fruits adjusted(g)                                     |              | X            |              |              | X            |              |
| Other neurological disorders | Male   | Cumulative Cigarettes (10 Years)                       |              |              | X            |              |              | X            |
| Other neurological disorders | Female | Cumulative Cigarettes (10 Years)                       |              |              | X            |              |              | X            |
| Other neurological disorders | Female | Pig Meat (kg per capita)                               | X            |              |              | X            |              |              |
| Other neurological disorders | Female | Underweight (proportion <2SD weight for age, <5 years) | X            |              |              | X            |              |              |
| Other neurological disorders | Male   | Cumulative Cigarettes (5 Years)                        |              |              | X            |              |              | X            |
| Other neurological disorders | Female | Cumulative Cigarettes (5 Years)                        |              |              | X            |              |              | X            |
| Other neurological disorders | Male   | Pig Meat (kg per capita)                               | X            |              |              | X            |              |              |
| Other neurological disorders | Male   | Underweight (proportion <2SD weight for age, <5 years) | X            |              |              | X            |              |              |
| Other neurological disorders | Female | Smoking Prevalence                                     |              |              | X            |              |              | X            |
| Other neurological disorders | Male   | red meats adjusted(g)                                  |              | X            |              | X            |              |              |
| Other neurological disorders | Female | red meats adjusted(g)                                  |              | X            |              | X            |              |              |
| Other neurological disorders | Male   | Alcohol (liters per capita)                            |              | X            |              |              | X            |              |
| Other neurological disorders | Female | Alcohol (liters per capita)                            |              | X            |              |              | X            |              |
| Other neurological disorders | Male   | Education (years per capita)                           |              |              | X            |              |              | X            |
| Other neurological disorders | Male   | LDI (IS per capita)                                    |              |              | X            |              |              | X            |
| Other neurological disorders | Female | LDI (IS per capita)                                    |              |              | X            |              |              | X            |
| Other neurological disorders | Male   | Population Density (over 1000 ppl/sqkm, proportion)    |              | X            |              |              | X            |              |
| Other neurological disorders | Female | Population Density (over 1000 ppl/sqkm, proportion)    |              | X            |              |              | X            |              |
| Other neurological disorders | Male   | Healthcare access and quality index                    |              | X            |              |              | X            |              |
| Other neurological disorders | Female | Healthcare access and quality index                    |              | X            |              |              | X            |              |
| Other neurological disorders | Male   | Mean BMI                                               | X            |              |              | X            |              |              |
| Other neurological disorders | Female | Mean BMI                                               | X            |              |              | X            |              |              |
| Other neurological disorders | Male   | Socio-demographic Index                                |              |              | X            |              |              | X            |
| Other neurological disorders | Female | Socio-demographic Index                                |              |              | X            |              |              | X            |
| Other neurological disorders | Male   | Cholesterol (total, mean per capita)                   | X            |              |              | X            |              |              |
| Other neurological disorders | Female | Cholesterol (total, mean per capita)                   | X            |              |              | X            |              |              |
| Other neurological disorders | Male   | Systolic Blood Pressure (mmHg)                         | X            |              |              | X            |              |              |
| Other neurological disorders | Female | Systolic Blood Pressure (mmHg)                         | X            |              |              | X            |              |              |
| Other neurological disorders | Male   | Smoking Prevalence                                     |              |              | X            |              |              | X            |
| Other neurological disorders | Male   | Education (years per capita)                           |              |              | X            |              |              | X            |
| Alcohol use disorders        | Female | Cumulative Cigarettes (10 Years)                       |              | X            |              |              | X            |              |
| Alcohol use disorders        | Male   | Alcohol (liters per capita)                            | X            |              |              | X            |              |              |
| Alcohol use disorders        | Male   | LDI (IS per capita)                                    |              |              | X            |              |              | X            |
| Alcohol use disorders        | Female | LDI (IS per capita)                                    |              |              | X            |              |              | X            |
| Alcohol use disorders        | Male   | Healthcare access and quality index                    |              | X            |              |              | X            |              |
| Alcohol use disorders        | Female | Healthcare access and quality index                    |              | X            |              |              | X            |              |
| Alcohol use disorders        | Male   | Health System Access 2 (unitless)                      |              | X            |              |              | X            |              |
| Alcohol use disorders        | Female | Health System Access 2 (unitless)                      |              | X            |              |              | X            |              |
| Alcohol use disorders        | Female | Education (years per capita)                           |              |              | X            |              |              | X            |
| Alcohol use disorders        | Male   | Socio-demographic Index                                |              |              | X            |              |              | X            |
| Alcohol use disorders        | Male   | Smoking Prevalence                                     |              | X            |              |              | X            |              |
| Alcohol use disorders        | Female | Smoking Prevalence                                     |              | X            |              |              | X            |              |
| Alcohol use disorders        | Male   | Cumulative Cigarettes (10 Years)                       |              | X            |              |              | X            |              |
| Alcohol use disorders        | Male   | Religion (binary, >50% Muslim)                         |              | X            |              |              | X            |              |
| Alcohol use disorders        | Female | Religion (binary, >50% Muslim)                         |              | X            |              |              | X            |              |
| Alcohol use disorders        | Female | Alcohol binge drinker proportion, age-standardized     | X            |              |              | X            |              |              |
| Alcohol use disorders        | Female | Socio-demographic Index                                |              |              | X            |              |              | X            |
| Alcohol use disorders        | Male   | Education (years per capita)                           |              |              | X            |              |              | X            |
| Alcohol use disorders        | Male   | Alcohol binge drinker proportion, age-standardized     | X            |              |              | X            |              |              |
| Alcohol use disorders        | Female | Alcohol (liters per capita)                            | X            |              |              | X            |              |              |
| Alcohol use disorders        | Female | Socio-demographic Index                                |              |              | X            |              |              | X            |
| Drug use disorders           | Female | Opium Cultivation (binary)                             | X            |              |              |              | X            |              |
| Drug use disorders           | Male   | Cumulative Cigarettes (5 Years)                        | X            |              |              |              | X            |              |
| Drug use disorders           | Female | Cumulative Cigarettes (10 Years)                       | X            |              |              |              | X            |              |
| Drug use disorders           | Male   | Cumulative Cigarettes (10 Years)                       | X            |              |              |              | X            |              |
| Drug use disorders           | Female | Smoking Prevalence                                     | X            |              |              |              | X            |              |
| Drug use disorders           | Male   | Smoking Prevalence                                     | X            |              |              |              | X            |              |
| Drug use disorders           | Male   | Socio-demographic Index                                |              |              | X            |              |              | X            |
| Drug use disorders           | Female | Healthcare access and quality index                    |              | X            |              |              | X            |              |
| Drug use disorders           | Male   | Healthcare access and quality index                    |              | X            |              |              | X            |              |
| Drug use disorders           | Female | LDI (IS per capita)                                    |              |              | X            |              |              | X            |
| Drug use disorders           | Male   | LDI (IS per capita)                                    |              |              | X            |              |              | X            |
| Drug use disorders           | Female | Education (years per capita)                           |              |              | X            |              |              | X            |
| Drug use disorders           | Male   | Education (years per capita)                           |              |              | X            |              |              | X            |
| Drug use disorders           | Female | Cumulative Cigarettes (5 Years)                        | X            |              |              |              | X            |              |
| Drug use disorders           | Male   | Opium Cultivation (binary)                             | X            |              |              |              | X            |              |
| Opioid use disorders         | Female | Cumulative Cigarettes (5 Years)                        | X            |              |              |              | X            |              |
| Opioid use disorders         | Male   | Opium Cultivation (binary)                             | X            |              |              |              | X            |              |
| Opioid use disorders         | Female | Opium Cultivation (binary)                             | X            |              |              |              | X            |              |
| Opioid use disorders         | Female | Cumulative Cigarettes (10 Years)                       | X            |              |              |              | X            |              |
| Opioid use disorders         | Male   | Cumulative Cigarettes (10 Years)                       | X            |              |              |              | X            |              |
| Opioid use disorders         | Female | Smoking Prevalence                                     | X            |              |              |              | X            |              |
| Opioid use disorders         | Male   | Smoking Prevalence                                     | X            |              |              |              | X            |              |

Appendix Table 10: Comparison of GBD 2016 and GBD 2017 covariates and level of covariates used in cause of death modeling

| Cause                     | Sex    | Covariate                                              | Level 1 2017 | Level 2 2017 | Level 3 2017 | Level 1 2016 | Level 2 2016 | Level 3 2016 |
|---------------------------|--------|--------------------------------------------------------|--------------|--------------|--------------|--------------|--------------|--------------|
| Opioid use disorders      | Female | Socio-demographic Index                                |              |              | X            |              |              | X            |
| Opioid use disorders      | Male   | Socio-demographic Index                                |              |              | X            |              |              | X            |
| Opioid use disorders      | Male   | Healthcare access and quality index                    |              | X            |              |              | X            |              |
| Opioid use disorders      | Female | LDI (\$ per capita)                                    |              |              | X            |              |              | X            |
| Opioid use disorders      | Male   | LDI (\$ per capita)                                    |              |              | X            |              |              | X            |
| Opioid use disorders      | Female | Education (years per capita)                           |              |              | X            |              |              | X            |
| Opioid use disorders      | Male   | Education (years per capita)                           |              |              | X            |              |              | X            |
| Opioid use disorders      | Female | Healthcare access and quality index                    |              | X            |              |              | X            |              |
| Opioid use disorders      | Male   | Cumulative Cigarettes (5 Years)                        | X            |              |              |              | X            |              |
| Cocaine use disorders     | Female | Alcohol (liters per capita)                            | X            |              |              | X            |              |              |
| Cocaine use disorders     | Female | Cumulative Cigarettes (5 Years)                        | X            |              |              | X            |              |              |
| Cocaine use disorders     | Female | Education (years per capita)                           |              |              |              |              |              | X            |
| Cocaine use disorders     | Male   | LDI (\$ per capita)                                    |              |              | X            |              |              | X            |
| Cocaine use disorders     | Female | LDI (\$ per capita)                                    |              |              | X            |              |              | X            |
| Cocaine use disorders     | Male   | Healthcare access and quality index                    |              | X            |              |              | X            |              |
| Cocaine use disorders     | Female | Healthcare access and quality index                    |              | X            |              |              | X            |              |
| Cocaine use disorders     | Male   | Socio-demographic Index                                |              |              | X            |              |              | X            |
| Cocaine use disorders     | Female | Socio-demographic Index                                |              |              | X            |              |              | X            |
| Cocaine use disorders     | Male   | Smoking Prevalence                                     | X            |              |              | X            |              |              |
| Cocaine use disorders     | Female | Smoking Prevalence                                     | X            |              |              | X            |              |              |
| Cocaine use disorders     | Male   | Cumulative Cigarettes (10 Years)                       | X            |              |              | X            |              |              |
| Cocaine use disorders     | Female | Cumulative Cigarettes (10 Years)                       | X            |              |              | X            |              |              |
| Cocaine use disorders     | Male   | Cumulative Cigarettes (5 Years)                        | X            |              |              | X            |              |              |
| Cocaine use disorders     | Male   | Education (years per capita)                           |              |              | X            |              |              | X            |
| Cocaine use disorders     | Male   | Alcohol (liters per capita)                            | X            |              |              | X            |              |              |
| Amphetamine use disorders | Female | Healthcare access and quality index                    |              |              |              |              |              | X            |
| Amphetamine use disorders | Male   | Cumulative Cigarettes (5 Years)                        |              | X            |              |              | X            |              |
| Amphetamine use disorders | Female | Cumulative Cigarettes (5 Years)                        |              | X            |              |              | X            |              |
| Amphetamine use disorders | Female | Cumulative Cigarettes (10 Years)                       |              | X            |              |              | X            |              |
| Amphetamine use disorders | Male   | Cumulative Cigarettes (10 Years)                       |              | X            |              |              | X            |              |
| Amphetamine use disorders | Female | Smoking Prevalence                                     |              | X            |              |              | X            |              |
| Amphetamine use disorders | Male   | Smoking Prevalence                                     |              | X            |              |              | X            |              |
| Amphetamine use disorders | Female | Socio-demographic Index                                |              |              | X            |              |              | X            |
| Amphetamine use disorders | Female | Alcohol (liters per capita)                            | X            |              |              | X            |              |              |
| Amphetamine use disorders | Male   | Education (years per capita)                           |              |              | X            |              |              | X            |
| Amphetamine use disorders | Female | Education (years per capita)                           |              |              | X            |              |              | X            |
| Amphetamine use disorders | Male   | LDI (\$ per capita)                                    |              |              | X            |              |              | X            |
| Amphetamine use disorders | Male   | Alcohol (liters per capita)                            | X            |              |              | X            |              |              |
| Amphetamine use disorders | Male   | Healthcare access and quality index                    |              | X            |              |              | X            |              |
| Amphetamine use disorders | Male   | Socio-demographic Index                                |              |              | X            |              |              | X            |
| Amphetamine use disorders | Female | LDI (\$ per capita)                                    |              |              | X            |              |              | X            |
| Other drug use disorders  | Male   | Healthcare access and quality index                    |              | X            |              |              | X            |              |
| Other drug use disorders  | Female | LDI (\$ per capita)                                    |              |              | X            |              |              | X            |
| Other drug use disorders  | Male   | LDI (\$ per capita)                                    |              |              | X            |              |              | X            |
| Other drug use disorders  | Female | Education (years per capita)                           |              |              | X            |              |              | X            |
| Other drug use disorders  | Male   | Education (years per capita)                           |              |              | X            |              |              | X            |
| Other drug use disorders  | Female | Alcohol (liters per capita)                            | X            |              |              | X            |              |              |
| Other drug use disorders  | Male   | Alcohol (liters per capita)                            | X            |              |              | X            |              |              |
| Other drug use disorders  | Female | Socio-demographic Index                                |              |              | X            |              |              | X            |
| Other drug use disorders  | Male   | Socio-demographic Index                                |              |              | X            |              |              | X            |
| Other drug use disorders  | Female | Smoking Prevalence                                     | X            |              |              | X            |              |              |
| Other drug use disorders  | Male   | Cumulative Cigarettes (10 Years)                       | X            |              |              | X            |              |              |
| Other drug use disorders  | Female | Cumulative Cigarettes (10 Years)                       | X            |              |              | X            |              |              |
| Other drug use disorders  | Male   | Cumulative Cigarettes (5 Years)                        | X            |              |              | X            |              |              |
| Other drug use disorders  | Female | Healthcare access and quality index                    |              | X            |              |              | X            |              |
| Other drug use disorders  | Female | Cumulative Cigarettes (5 Years)                        | X            |              |              | X            |              |              |
| Other drug use disorders  | Male   | Smoking Prevalence                                     | X            |              |              | X            |              |              |
| Other drug use disorders  | Male   | Education (years per capita)                           | X            |              |              | X            |              |              |
| Eating disorders          | Female | Maternal Education (years per capita)                  | X            |              |              | X            |              |              |
| Eating disorders          | Female | Education (years per capita)                           | X            |              |              | X            |              |              |
| Eating disorders          | Female | Underweight (proportion <2SD weight for age, <5 years) | X            |              |              | X            |              |              |
| Eating disorders          | Female | Underweight (proportion <2SD weight for age, <5 years) | X            |              |              | X            |              |              |
| Eating disorders          | Male   | Underweight (proportion <2SD weight for age, <5 years) | X            |              |              | X            |              |              |
| Eating disorders          | Female | Sanitation (proportion with access)                    | X            |              |              | X            |              |              |
| Eating disorders          | Male   | Sanitation (proportion with access)                    | X            |              |              | X            |              |              |
| Eating disorders          | Female | Socio-demographic Index                                |              |              | X            |              |              | X            |
| Eating disorders          | Male   | Socio-demographic Index                                |              |              | X            |              |              | X            |
| Eating disorders          | Female | Healthcare access and quality index                    |              | X            |              |              | X            |              |
| Eating disorders          | Male   | Healthcare access and quality index                    |              | X            |              |              | X            |              |
| Eating disorders          | Female | LDI (\$ per capita)                                    | X            |              |              | X            |              |              |
| Eating disorders          | Male   | LDI (\$ per capita)                                    | X            |              |              | X            |              |              |
| Eating disorders          | Male   | Maternal Education (years per capita)                  | X            |              |              | X            |              |              |
| Anorexia nervosa          | Male   | Maternal Education (years per capita)                  | X            |              |              | X            |              |              |
| Anorexia nervosa          | Male   | Education (years per capita)                           | X            |              |              | X            |              |              |
| Anorexia nervosa          | Male   | Underweight (proportion <2SD weight for age, <5 years) | X            |              |              | X            |              |              |
| Anorexia nervosa          | Female | Education (years per capita)                           | X            |              |              | X            |              |              |
| Anorexia nervosa          | Female | Underweight (proportion <2SD weight for age, <5 years) | X            |              |              | X            |              |              |
| Anorexia nervosa          | Male   | LDI (\$ per capita)                                    | X            |              |              | X            |              |              |
| Anorexia nervosa          | Female | LDI (\$ per capita)                                    | X            |              |              | X            |              |              |
| Anorexia nervosa          | Male   | Healthcare access and quality index                    |              | X            |              |              | X            |              |
| Anorexia nervosa          | Female | Maternal Education (years per capita)                  | X            |              |              | X            |              |              |
| Anorexia nervosa          | Male   | Socio-demographic Index                                |              |              | X            |              |              | X            |
| Anorexia nervosa          | Female | Socio-demographic Index                                |              |              | X            |              |              | X            |
| Anorexia nervosa          | Male   | Sanitation (proportion with access)                    | X            |              |              | X            |              |              |
| Anorexia nervosa          | Female | Sanitation (proportion with access)                    | X            |              |              | X            |              |              |
| Anorexia nervosa          | Female | Healthcare access and quality index                    |              | X            |              |              | X            |              |
| Bulimia nervosa           | Female | Education (years per capita)                           | X            |              |              | X            |              |              |
| Bulimia nervosa           | Male   | LDI (\$ per capita)                                    | X            |              |              | X            |              |              |
| Bulimia nervosa           | Male   | Education (years per capita)                           | X            |              |              | X            |              |              |
| Bulimia nervosa           | Female | Healthcare access and quality index                    |              | X            |              |              | X            |              |
| Bulimia nervosa           | Female | Socio-demographic Index                                |              |              | X            |              |              | X            |
| Bulimia nervosa           | Male   | Sanitation (proportion with access)                    | X            |              |              | X            |              |              |
| Bulimia nervosa           | Female | Sanitation (proportion with access)                    | X            |              |              | X            |              |              |
| Bulimia nervosa           | Male   | Underweight (proportion <2SD weight for age, <5 years) | X            |              |              | X            |              |              |
| Bulimia nervosa           | Male   | Maternal Education (years per capita)                  | X            |              |              | X            |              |              |
| Bulimia nervosa           | Female | Maternal Education (years per capita)                  | X            |              |              | X            |              |              |
| Bulimia nervosa           | Male   | Socio-demographic Index                                |              |              | X            |              |              | X            |
| Bulimia nervosa           | Female | Underweight (proportion <2SD weight for age, <5 years) | X            |              |              | X            |              |              |
| Bulimia nervosa           | Male   | Healthcare access and quality index                    |              | X            |              |              | X            |              |
| Bulimia nervosa           | Female | LDI (\$ per capita)                                    | X            |              |              | X            |              |              |
| Diabetes mellitus         | Male   | Diabetes Fasting Plasma Glucose (mmol/L)               |              | X            |              | X            |              |              |
| Diabetes mellitus         | Female | Diabetes Fasting Plasma Glucose (mmol/L)               |              | X            |              | X            |              |              |
| Diabetes mellitus         | Male   | Mean BMI                                               |              | X            |              | X            |              |              |
| Diabetes mellitus         | Female | Mean BMI                                               |              | X            |              | X            |              |              |
| Diabetes mellitus         | Male   | Diabetes Age-Standardized Prevalence (proportion)      |              | X            |              | X            |              |              |
| Diabetes mellitus         | Female | Diabetes Age-Standardized Prevalence (proportion)      |              | X            |              | X            |              |              |
| Diabetes mellitus         | Male   | Healthcare access and quality index                    |              | X            |              | X            |              |              |
| Diabetes mellitus         | Male   | Healthcare access and quality index                    |              | X            |              |              |              | X            |
| Diabetes mellitus         | Female | Healthcare access and quality index                    |              | X            |              | X            |              |              |
| Diabetes mellitus         | Female | Healthcare access and quality index                    |              | X            |              |              |              | X            |
| Diabetes mellitus         | Male   | LDI (\$ per capita)                                    |              |              | X            |              |              | X            |
| Diabetes mellitus         | Female | LDI (\$ per capita)                                    |              |              | X            |              |              | X            |
| Diabetes mellitus         | Male   | Education (years per capita)                           |              |              | X            |              |              | X            |
| Diabetes mellitus         | Female | Education (years per capita)                           |              |              | X            |              |              | X            |
| Diabetes mellitus         | Male   | vegetables adjusted(g)                                 |              | X            |              |              | X            |              |
| Diabetes mellitus         | Female | Cholesterol (total, mean per capita)                   |              | X            |              |              | X            |              |
| Diabetes mellitus         | Male   | Cholesterol (total, mean per capita)                   |              | X            |              |              | X            |              |
| Diabetes mellitus         | Female | vegetables adjusted(g)                                 |              | X            |              |              | X            |              |
| Diabetes mellitus         | Male   | fruits adjusted(g)                                     |              | X            |              |              | X            |              |
| Diabetes mellitus         | Female | fruits adjusted(g)                                     |              | X            |              |              | X            |              |
| Diabetes mellitus         | Male   | Systolic Blood Pressure (mmHg)                         |              | X            |              |              | X            |              |
| Diabetes mellitus         | Female | Systolic Blood Pressure (mmHg)                         |              | X            |              |              | X            |              |
| Acute glomerulonephritis  | Female | LDI (\$ per capita)                                    |              |              | X            |              |              | X            |
| Acute glomerulonephritis  | Female | Improved Water Source (proportion with access)         |              | X            |              |              | X            |              |

Appendix Table 10: Comparison of GBD 2016 and GBD 2017 covariates and level of covariates used in cause of death modeling

| Cause                                 | Sex    | Covariate                                                      | Level 1 2017 | Level 2 2017 | Level 3 2017 | Level 1 2016 | Level 2 2016 | Level 3 2016 |
|---------------------------------------|--------|----------------------------------------------------------------|--------------|--------------|--------------|--------------|--------------|--------------|
| Acute glomerulonephritis              | Male   | Sanitation (proportion with access)                            |              | X            |              |              | X            |              |
| Acute glomerulonephritis              | Female | Sanitation (proportion with access)                            |              | X            |              |              | X            |              |
| Acute glomerulonephritis              | Male   | Systolic Blood Pressure (mmHg)                                 |              | X            |              |              | X            |              |
| Acute glomerulonephritis              | Male   | Improved Water Source (proportion with access)                 |              | X            |              |              | X            |              |
| Acute glomerulonephritis              | Male   | Socio-demographic Index                                        |              |              | X            |              |              | X            |
| Acute glomerulonephritis              | Male   | Education (years per capita)                                   |              |              | X            |              |              | X            |
| Acute glomerulonephritis              | Female | Systolic Blood Pressure (mmHg)                                 |              | X            |              |              | X            |              |
| Acute glomerulonephritis              | Female | Education (years per capita)                                   |              |              | X            |              |              | X            |
| Acute glomerulonephritis              | Female | Healthcare access and quality index                            |              | X            |              |              | X            |              |
| Acute glomerulonephritis              | Male   | Healthcare access and quality index                            |              | X            |              |              | X            |              |
| Acute glomerulonephritis              | Male   | LDI (US per capita)                                            |              |              | X            |              |              | X            |
| Acute glomerulonephritis              | Female | Diabetes Age-Standardized Prevalence (proportion)              |              | X            |              |              | X            |              |
| Acute glomerulonephritis              | Male   | Diabetes Age-Standardized Prevalence (proportion)              |              | X            |              |              | X            |              |
| Acute glomerulonephritis              | Female | Socio-demographic Index                                        |              |              | X            |              |              | X            |
| Chronic kidney disease                | Male   | Mean BMI                                                       | X            |              |              | X            |              |              |
| Chronic kidney disease                | Female | LDI (US per capita)                                            |              |              | X            |              |              | X            |
| Chronic kidney disease                | Male   | LDI (US per capita)                                            |              |              | X            |              |              | X            |
| Chronic kidney disease                | Female | Healthcare access and quality index                            | X            |              |              | X            |              |              |
| Chronic kidney disease                | Male   | Healthcare access and quality index                            | X            |              |              | X            |              |              |
| Chronic kidney disease                | Female | Diabetes Age-Standardized Prevalence (proportion)              | X            |              |              | X            |              |              |
| Chronic kidney disease                | Male   | Diabetes Age-Standardized Prevalence (proportion)              | X            |              |              | X            |              |              |
| Chronic kidney disease                | Female | Mean BMI                                                       | X            |              |              |              |              | X            |
| Chronic kidney disease                | Female | Education (years per capita)                                   |              |              | X            |              |              | X            |
| Chronic kidney disease                | Male   | Education (years per capita)                                   |              |              | X            |              |              | X            |
| Chronic kidney disease                | Female | Socio-demographic Index                                        |              |              | X            |              |              | X            |
| Chronic kidney disease                | Female | Diabetes Fasting Plasma Glucose (mmol/L)                       | X            |              |              | X            |              |              |
| Chronic kidney disease                | Male   | energy unadjusted(kcal)                                        |              | X            |              |              | X            |              |
| Chronic kidney disease                | Male   | red meats adjusted(g)                                          |              | X            |              |              | X            |              |
| Chronic kidney disease                | Male   | Socio-demographic Index                                        |              |              | X            |              |              | X            |
| Chronic kidney disease                | Female | red meats adjusted(g)                                          |              | X            |              |              | X            |              |
| Chronic kidney disease                | Female | energy unadjusted(kcal)                                        |              | X            |              |              | X            |              |
| Chronic kidney disease                | Female | Systolic Blood Pressure (mmHg)                                 | X            |              |              | X            |              |              |
| Chronic kidney disease                | Male   | Diabetes Fasting Plasma Glucose (mmol/L)                       | X            |              |              | X            |              |              |
| Chronic kidney disease                | Female | Cholesterol (total, men per capita)                            |              | X            |              |              | X            |              |
| Chronic kidney disease                | Male   | Cholesterol (total, men per capita)                            |              | X            |              |              | X            |              |
| Chronic kidney disease                | Male   | Systolic Blood Pressure (mmHg)                                 | X            |              |              | X            |              |              |
| Urinary diseases and male infertility | Female | Latitude Under 15 (proportion)                                 |              | X            |              |              | X            |              |
| Urinary diseases and male infertility | Male   | Latitude Under 15 (proportion)                                 |              | X            |              |              | X            |              |
| Urinary diseases and male infertility | Female | Latitude Over 45 (proportion)                                  |              | X            |              |              | X            |              |
| Urinary diseases and male infertility | Male   | Latitude Over 45 (proportion)                                  |              | X            |              |              | X            |              |
| Urinary diseases and male infertility | Female | Latitude 30 to 45 (proportion)                                 |              | X            |              |              | X            |              |
| Urinary diseases and male infertility | Male   | Latitude 30 to 45 (proportion)                                 |              | X            |              |              | X            |              |
| Urinary diseases and male infertility | Female | Latitude 15 to 30 (proportion)                                 |              | X            |              |              | X            |              |
| Urinary diseases and male infertility | Male   | Latitude 15 to 30 (proportion)                                 |              | X            |              |              | X            |              |
| Urinary diseases and male infertility | Male   | Socio-demographic Index                                        |              |              | X            |              |              | X            |
| Urinary diseases and male infertility | Male   | Mean BMI                                                       |              | X            |              |              | X            |              |
| Urinary diseases and male infertility | Female | Healthcare access and quality index                            |              | X            |              |              | X            |              |
| Urinary diseases and male infertility | Male   | Healthcare access and quality index                            |              | X            |              |              | X            |              |
| Urinary diseases and male infertility | Female | LDI (US per capita)                                            |              |              | X            |              |              | X            |
| Urinary diseases and male infertility | Male   | LDI (US per capita)                                            |              |              | X            |              |              | X            |
| Urinary diseases and male infertility | Female | Education (years per capita)                                   |              |              | X            |              |              | X            |
| Urinary diseases and male infertility | Male   | Education (years per capita)                                   |              |              | X            |              |              | X            |
| Urinary diseases and male infertility | Female | Socio-demographic Index                                        |              |              | X            |              |              | X            |
| Urinary diseases and male infertility | Female | Mean BMI                                                       |              | X            |              |              | X            |              |
| Urinary tract infections              | Female | Education (years per capita)                                   |              | X            |              |              | X            |              |
| Urinary tract infections              | Male   | Education (years per capita)                                   |              | X            |              |              | X            |              |
| Urinary tract infections              | Female | LDI (US per capita)                                            |              |              | X            |              |              | X            |
| Urinary tract infections              | Male   | LDI (US per capita)                                            |              |              | X            |              |              | X            |
| Urinary tract infections              | Female | Healthcare access and quality index                            |              |              | X            |              |              | X            |
| Urinary tract infections              | Male   | Healthcare access and quality index                            |              |              | X            |              |              | X            |
| Urinary tract infections              | Female | Socio-demographic Index                                        |              |              | X            |              |              | X            |
| Urinary tract infections              | Male   | Socio-demographic Index                                        |              |              | X            |              |              | X            |
| Urinary tract infections              | Male   | Health System Access (capped)                                  |              | X            |              |              | X            |              |
| Urinary tract infections              | Female | Sanitation (proportion with access)                            | X            |              |              | X            |              |              |
| Urinary tract infections              | Male   | Sanitation (proportion with access)                            | X            |              |              | X            |              |              |
| Urolithiasis                          | Female | LDI (US per capita)                                            |              |              | X            |              |              | X            |
| Urolithiasis                          | Male   | Healthcare access and quality index                            | X            |              |              | X            |              |              |
| Urolithiasis                          | Female | Socio-demographic Index                                        |              |              | X            |              |              | X            |
| Urolithiasis                          | Male   | Socio-demographic Index                                        |              |              | X            |              |              | X            |
| Urolithiasis                          | Female | red meats adjusted(g)                                          |              | X            |              |              | X            |              |
| Urolithiasis                          | Male   | red meats adjusted(g)                                          |              | X            |              |              | X            |              |
| Urolithiasis                          | Male   | red meats adjusted(g)                                          |              | X            |              |              | X            |              |
| Urolithiasis                          | Female | vegetables adjusted(g)                                         |              | X            |              |              | X            |              |
| Urolithiasis                          | Male   | red meats adjusted(g)                                          | X            |              |              | X            |              |              |
| Urolithiasis                          | Female | fruits adjusted(g)                                             |              | X            |              |              | X            |              |
| Urolithiasis                          | Male   | fruits adjusted(g)                                             |              | X            |              |              | X            |              |
| Urolithiasis                          | Male   | Healthcare access and quality index                            | X            |              |              |              | X            |              |
| Urolithiasis                          | Female | 90th percentile climatic temperature in the given country-year | X            |              |              | X            |              |              |
| Urolithiasis                          | Male   | 90th percentile climatic temperature in the given country-year | X            |              |              | X            |              |              |
| Urolithiasis                          | Male   | red meats adjusted(g)                                          |              | X            |              |              | X            |              |
| Urolithiasis                          | Male   | Healthcare access and quality index                            |              | X            |              |              | X            |              |
| Urolithiasis                          | Male   | vegetables adjusted(g)                                         |              | X            |              |              | X            |              |
| Urolithiasis                          | Female | Healthcare access and quality index                            | X            |              |              | X            |              |              |
| Urolithiasis                          | Male   | LDI (US per capita)                                            |              |              | X            |              |              | X            |
| Urolithiasis                          | Male   | Education (years per capita)                                   |              |              | X            |              |              | X            |
| Urolithiasis                          | Female | Education (years per capita)                                   |              |              | X            |              |              | X            |
| Urolithiasis                          | Male   | Healthcare access and quality index                            |              | X            |              |              | X            |              |
| Urolithiasis                          | Female | Healthcare access and quality index                            |              | X            |              |              | X            |              |
| Urolithiasis                          | Female | Mean BMI                                                       | X            |              |              | X            |              |              |
| Urolithiasis                          | Male   | Socio-demographic Index                                        |              |              | X            |              |              | X            |
| Urolithiasis                          | Female | Socio-demographic Index                                        |              |              | X            |              |              | X            |
| Urolithiasis                          | Male   | Mean BMI                                                       | X            |              |              | X            |              |              |
| Gynecological diseases                | Female | Health System Access (capped)                                  |              | X            |              |              | X            |              |
| Gynecological diseases                | Female | Total Fertility Rate                                           |              | X            |              |              | X            |              |
| Gynecological diseases                | Female | Total Fertility Rate                                           |              | X            |              |              | X            |              |
| Gynecological diseases                | Female | Smoking Prevalence                                             | X            |              |              | X            |              |              |
| Gynecological diseases                | Female | Skilled Birth Attendance (proportion)                          |              | X            |              |              | X            |              |
| Gynecological diseases                | Female | Live Births 35+ (proportion)                                   |              | X            |              |              | X            |              |
| Gynecological diseases                | Female | Socio-demographic Index                                        |              |              | X            |              |              | X            |
| Gynecological diseases                | Female | Healthcare access and quality index                            |              | X            |              |              | X            |              |
| Gynecological diseases                | Female | Education (years per capita)                                   |              |              | X            |              |              | X            |
| Gynecological diseases                | Female | LDI (US per capita)                                            |              |              | X            |              |              | X            |
| Gynecological diseases                | Female | Live Births 35+ (proportion)                                   |              | X            |              |              | X            |              |
| Uterine fibroids                      | Female | Total Fertility Rate                                           |              | X            |              |              | X            |              |
| Uterine fibroids                      | Female | Smoking Prevalence                                             | X            |              |              | X            |              |              |
| Uterine fibroids                      | Female | Health System Access (capped)                                  |              | X            |              |              | X            |              |
| Uterine fibroids                      | Female | Skilled Birth Attendance (proportion)                          |              | X            |              |              | X            |              |
| Uterine fibroids                      | Female | Live Births 35+ (proportion)                                   |              | X            |              |              | X            |              |
| Uterine fibroids                      | Female | Healthcare access and quality index                            |              | X            |              |              | X            |              |
| Uterine fibroids                      | Female | LDI (US per capita)                                            |              |              | X            |              |              | X            |
| Uterine fibroids                      | Female | Socio-demographic Index                                        |              |              | X            |              |              | X            |
| Uterine fibroids                      | Female | Education (years per capita)                                   |              |              | X            |              |              | X            |
| Polycystic ovarian syndrome           | Female | LDI (US per capita)                                            |              |              | X            |              |              | X            |
| Polycystic ovarian syndrome           | Female | Healthcare access and quality index                            |              | X            |              |              | X            |              |
| Polycystic ovarian syndrome           | Female | Education (years per capita)                                   |              |              | X            |              |              | X            |
| Polycystic ovarian syndrome           | Female | Socio-demographic Index                                        |              |              | X            |              |              | X            |
| Polycystic ovarian syndrome           | Female | Live Births 35+ (proportion)                                   |              | X            |              |              | X            |              |
| Polycystic ovarian syndrome           | Female | Skilled Birth Attendance (proportion)                          |              | X            |              |              | X            |              |
| Polycystic ovarian syndrome           | Female | Health System Access (capped)                                  |              | X            |              |              | X            |              |



Appendix Table 10: Comparison of GBD 2016 and GBD 2017 covariates and level of covariates used in cause of death modeling

| Cause                                    | Sex    | Covariate                                                                   | Level 1 2017 | Level 2 2017 | Level 3 2017 | Level 1 2016 | Level 2 2016 | Level 3 2016 |
|------------------------------------------|--------|-----------------------------------------------------------------------------|--------------|--------------|--------------|--------------|--------------|--------------|
| Polycystic ovarian syndrome              | Female | Smoking Prevalence                                                          | X            |              |              | X            |              |              |
| Polycystic ovarian syndrome              | Female | Total Fertility Rate                                                        |              | X            |              |              | X            |              |
| Endometriosis                            | Female | Total Fertility Rate                                                        |              | X            |              |              | X            |              |
| Endometriosis                            | Female | Healthcare access and quality index                                         |              | X            |              |              | X            |              |
| Endometriosis                            | Female | Socio-demographic Index                                                     |              |              | X            |              |              | X            |
| Endometriosis                            | Female | Live Births 35+ (proportion)                                                |              | X            |              |              | X            |              |
| Endometriosis                            | Female | Skilled Birth Attendance (proportion)                                       |              | X            |              |              | X            |              |
| Endometriosis                            | Female | Health System Access (capped)                                               |              | X            |              |              | X            |              |
| Endometriosis                            | Female | Smoking Prevalence                                                          | X            |              |              | X            |              |              |
| Endometriosis                            | Female | LDI (5 per capita)                                                          |              |              | X            |              |              | X            |
| Endometriosis                            | Female | Education (years per capita)                                                |              |              | X            |              |              | X            |
| Genital prolapse                         | Female | Education (years per capita)                                                |              |              | X            |              |              | X            |
| Genital prolapse                         | Female | Socio-demographic Index                                                     |              |              | X            |              |              | X            |
| Genital prolapse                         | Female | Live Births 35+ (proportion)                                                |              | X            |              |              | X            |              |
| Genital prolapse                         | Female | Skilled Birth Attendance (proportion)                                       |              | X            |              |              | X            |              |
| Genital prolapse                         | Female | Health System Access (capped)                                               |              | X            |              |              | X            |              |
| Genital prolapse                         | Female | Smoking Prevalence                                                          | X            |              |              | X            |              |              |
| Genital prolapse                         | Female | Total Fertility Rate                                                        |              | X            |              |              | X            |              |
| Genital prolapse                         | Female | Healthcare access and quality index                                         |              | X            |              |              | X            |              |
| Genital prolapse                         | Female | LDI (5 per capita)                                                          |              |              | X            |              |              | X            |
| Other gynecological diseases             | Female | Live Births 35+ (proportion)                                                |              | X            |              |              | X            |              |
| Other gynecological diseases             | Female | Smoking Prevalence                                                          | X            |              |              | X            |              |              |
| Other gynecological diseases             | Female | Health System Access (capped)                                               |              | X            |              |              | X            |              |
| Other gynecological diseases             | Female | Skilled Birth Attendance (proportion)                                       |              | X            |              |              | X            |              |
| Other gynecological diseases             | Female | Education (years per capita)                                                |              |              | X            |              |              | X            |
| Other gynecological diseases             | Female | Socio-demographic Index                                                     |              |              | X            |              |              | X            |
| Other gynecological diseases             | Female | Healthcare access and quality index                                         |              | X            |              |              | X            |              |
| Other gynecological diseases             | Female | LDI (5 per capita)                                                          |              |              | X            |              |              | X            |
| Other gynecological diseases             | Female | Total Fertility Rate                                                        |              | X            |              |              | X            |              |
| Hemoglobinopathies and hemolytic anemias | Female | Latitude 30 to 45 (proportion)                                              |              |              | X            |              |              | X            |
| Hemoglobinopathies and hemolytic anemias | Female | Latitude Over 45 (proportion)                                               |              |              | X            |              |              | X            |
| Hemoglobinopathies and hemolytic anemias | Male   | Latitude Under 15 (proportion)                                              |              |              | X            |              |              | X            |
| Hemoglobinopathies and hemolytic anemias | Female | Latitude Under 15 (proportion)                                              |              |              | X            |              |              | X            |
| Hemoglobinopathies and hemolytic anemias | Male   | Malaria Lysenko PPR-1 (Holoendemic)                                         |              |              | X            |              |              | X            |
| Hemoglobinopathies and hemolytic anemias | Female | Malaria Lysenko PPR-1 (Holoendemic)                                         |              |              | X            |              |              | X            |
| Hemoglobinopathies and hemolytic anemias | Female | Hemoglobinopathies Prevalence x Excess Mortality                            | X            |              |              | X            |              |              |
| Hemoglobinopathies and hemolytic anemias | Male   | Hemoglobinopathies Prevalence x Excess Mortality                            | X            |              |              | X            |              |              |
| Hemoglobinopathies and hemolytic anemias | Female | Hemoglobinopathies Prevalence x Excess Mortality                            | X            |              |              | X            |              |              |
| Hemoglobinopathies and hemolytic anemias | Male   | Latitude 30 to 45 (proportion)                                              |              |              | X            |              |              | X            |
| Hemoglobinopathies and hemolytic anemias | Male   | Hemoglobinopathies Prevalence x Excess Mortality (excluding GPD deficiency) | X            |              |              | X            |              |              |
| Hemoglobinopathies and hemolytic anemias | Female | Hemoglobinopathies Prevalence x Excess Mortality (excluding GPD deficiency) | X            |              |              | X            |              |              |
| Hemoglobinopathies and hemolytic anemias | Female | Hemoglobinopathies Prevalence x Excess Mortality (excluding GPD deficiency) | X            |              |              | X            |              |              |
| Hemoglobinopathies and hemolytic anemias | Male   | Hemoglobinopathies Prevalence x Excess Mortality (excluding GPD deficiency) | X            |              |              | X            |              |              |
| Hemoglobinopathies and hemolytic anemias | Female | Latitude 15 to 30 (proportion)                                              |              |              | X            |              |              | X            |
| Hemoglobinopathies and hemolytic anemias | Male   | Latitude Over 45 (proportion)                                               |              |              | X            |              |              | X            |
| Hemoglobinopathies and hemolytic anemias | Female | Health System Access (capped)                                               |              | X            |              |              | X            |              |
| Hemoglobinopathies and hemolytic anemias | Male   | Education (years per capita)                                                |              | X            |              |              | X            |              |
| Hemoglobinopathies and hemolytic anemias | Male   | Education (years per capita)                                                |              | X            |              |              | X            |              |
| Hemoglobinopathies and hemolytic anemias | Female | Latitude 15 to 30 (proportion)                                              |              |              | X            |              |              | X            |
| Hemoglobinopathies and hemolytic anemias | Female | Education (years per capita)                                                |              |              | X            |              |              | X            |
| Hemoglobinopathies and hemolytic anemias | Male   | LDI (5 per capita)                                                          |              |              | X            |              |              | X            |
| Hemoglobinopathies and hemolytic anemias | Female | LDI (5 per capita)                                                          |              |              | X            |              |              | X            |
| Hemoglobinopathies and hemolytic anemias | Female | LDI (5 per capita)                                                          |              |              | X            |              |              | X            |
| Hemoglobinopathies and hemolytic anemias | Female | Education (years per capita)                                                |              |              | X            |              |              | X            |
| Hemoglobinopathies and hemolytic anemias | Female | Healthcare access and quality index                                         |              | X            |              |              | X            |              |
| Hemoglobinopathies and hemolytic anemias | Male   | Socio-demographic Index                                                     |              |              | X            |              |              | X            |
| Hemoglobinopathies and hemolytic anemias | Female | Socio-demographic Index                                                     |              |              | X            |              |              | X            |
| Hemoglobinopathies and hemolytic anemias | Female | Socio-demographic Index                                                     |              |              | X            |              |              | X            |
| Hemoglobinopathies and hemolytic anemias | Male   | Health System Access (capped)                                               |              | X            |              |              | X            |              |
| Hemoglobinopathies and hemolytic anemias | Male   | Health System Access (capped)                                               |              | X            |              |              | X            |              |
| Hemoglobinopathies and hemolytic anemias | Female | Health System Access (capped)                                               |              | X            |              |              | X            |              |
| Hemoglobinopathies and hemolytic anemias | Male   | Healthcare access and quality index                                         |              | X            |              |              | X            |              |
| Hemoglobinopathies and hemolytic anemias | Male   | Socio-demographic Index                                                     |              |              | X            |              |              | X            |
| Hemoglobinopathies and hemolytic anemias | Female | Mean BMI                                                                    |              |              | X            |              |              | X            |
| Hemoglobinopathies and hemolytic anemias | Male   | Healthcare access and quality index                                         |              | X            |              |              | X            |              |
| Hemoglobinopathies and hemolytic anemias | Female | Healthcare access and quality index                                         |              | X            |              |              | X            |              |
| Hemoglobinopathies and hemolytic anemias | Male   | Alcohol (liters per capita)                                                 |              | X            |              |              | X            |              |
| Hemoglobinopathies and hemolytic anemias | Female | LDI (5 per capita)                                                          |              |              | X            |              |              | X            |
| Hemoglobinopathies and hemolytic anemias | Male   | Education (years per capita)                                                |              |              | X            |              |              | X            |
| Hemoglobinopathies and hemolytic anemias | Female | Education (years per capita)                                                |              |              | X            |              |              | X            |
| Hemoglobinopathies and hemolytic anemias | Female | Alcohol (liters per capita)                                                 |              | X            |              |              | X            |              |
| Hemoglobinopathies and hemolytic anemias | Male   | Cholesterol (total, mean per capita)                                        |              | X            |              |              | X            |              |
| Hemoglobinopathies and hemolytic anemias | Male   | LDI (5 per capita)                                                          |              |              | X            |              |              | X            |
| Hemoglobinopathies and hemolytic anemias | Male   | Cholesterol (total, mean per capita)                                        |              | X            |              |              | X            |              |
| Hemoglobinopathies and hemolytic anemias | Female | Mean BMI                                                                    | X            |              |              | X            |              |              |
| Musculoskeletal disorders                | Female | vegetables adjusted(g)                                                      |              | X            |              |              | X            |              |
| Musculoskeletal disorders                | Male   | Alcohol (liters per capita)                                                 |              | X            |              |              | X            |              |
| Musculoskeletal disorders                | Female | Alcohol (liters per capita)                                                 |              | X            |              |              | X            |              |
| Musculoskeletal disorders                | Male   | Education (years per capita)                                                |              | X            |              |              | X            |              |
| Musculoskeletal disorders                | Female | Education (years per capita)                                                |              | X            |              |              | X            |              |
| Musculoskeletal disorders                | Male   | LDI (5 per capita)                                                          |              | X            |              |              | X            |              |
| Musculoskeletal disorders                | Female | LDI (5 per capita)                                                          |              | X            |              |              | X            |              |
| Musculoskeletal disorders                | Male   | Healthcare access and quality index                                         |              | X            |              |              | X            |              |
| Musculoskeletal disorders                | Female | Healthcare access and quality index                                         |              | X            |              |              | X            |              |
| Musculoskeletal disorders                | Male   | Mean BMI                                                                    | X            |              |              | X            |              |              |
| Musculoskeletal disorders                | Female | Mean BMI                                                                    | X            |              |              | X            |              |              |
| Musculoskeletal disorders                | Male   | Socio-demographic Index                                                     |              |              | X            |              |              | X            |
| Musculoskeletal disorders                | Female | Socio-demographic Index                                                     |              |              | X            |              |              | X            |
| Musculoskeletal disorders                | Male   | Cholesterol (total, mean per capita)                                        |              | X            |              |              | X            |              |
| Musculoskeletal disorders                | Male   | Cumulative Cigarettes (10 Years)                                            |              | X            |              |              | X            |              |
| Musculoskeletal disorders                | Male   | Smoking Prevalence                                                          |              | X            |              |              | X            |              |
| Musculoskeletal disorders                | Female | Smoking Prevalence                                                          |              | X            |              |              | X            |              |
| Musculoskeletal disorders                | Male   | vegetables adjusted(g)                                                      |              | X            |              |              | X            |              |
| Musculoskeletal disorders                | Female | Cholesterol (total, mean per capita)                                        |              | X            |              |              | X            |              |
| Musculoskeletal disorders                | Female | Cumulative Cigarettes (5 Years)                                             |              | X            |              |              | X            |              |
| Musculoskeletal disorders                | Male   | Cumulative Cigarettes (5 Years)                                             |              | X            |              |              | X            |              |
| Musculoskeletal disorders                | Female | Cumulative Cigarettes (10 Years)                                            |              | X            |              |              | X            |              |
| Musculoskeletal disorders                | Female | Education (years per capita)                                                |              |              | X            |              |              | X            |
| Rheumatoid arthritis                     | Male   | Alcohol (liters per capita)                                                 | X            |              |              | X            |              |              |
| Rheumatoid arthritis                     | Female | Alcohol (liters per capita)                                                 | X            |              |              | X            |              |              |
| Rheumatoid arthritis                     | Male   | LDI (5 per capita)                                                          |              |              | X            |              |              | X            |
| Rheumatoid arthritis                     | Female | Healthcare access and quality index                                         | X            |              |              | X            |              |              |
| Rheumatoid arthritis                     | Male   | Healthcare access and quality index                                         | X            |              |              | X            |              |              |
| Rheumatoid arthritis                     | Female | Mean BMI                                                                    |              |              | X            |              | X            |              |
| Rheumatoid arthritis                     | Female | Socio-demographic Index                                                     |              |              | X            |              |              | X            |
| Rheumatoid arthritis                     | Male   | Education (years per capita)                                                |              |              | X            |              |              | X            |
| Rheumatoid arthritis                     | Female | Cholesterol (total, mean per capita)                                        |              | X            |              |              | X            |              |
| Rheumatoid arthritis                     | Male   | Cholesterol (total, mean per capita)                                        |              | X            |              |              | X            |              |
| Rheumatoid arthritis                     | Female | Smoking Prevalence                                                          | X            |              |              | X            |              |              |
| Rheumatoid arthritis                     | Male   | Smoking Prevalence                                                          | X            |              |              | X            |              |              |
| Rheumatoid arthritis                     | Female | Cumulative Cigarettes (10 Years)                                            |              | X            |              |              | X            |              |
| Rheumatoid arthritis                     | Male   | Cumulative Cigarettes (10 Years)                                            |              | X            |              |              | X            |              |
| Rheumatoid arthritis                     | Female | Cumulative Cigarettes (5 Years)                                             |              | X            |              |              | X            |              |
| Rheumatoid arthritis                     | Male   | Cumulative Cigarettes (5 Years)                                             |              | X            |              |              | X            |              |
| Rheumatoid arthritis                     | Male   | Socio-demographic Index                                                     |              |              | X            |              |              | X            |
| Rheumatoid arthritis                     | Female | LDI (5 per capita)                                                          |              |              | X            |              |              | X            |
| Other musculoskeletal disorders          | Female | Cumulative Cigarettes (5 Years)                                             |              | X            |              |              | X            |              |
| Other musculoskeletal disorders          | Female | Cumulative Cigarettes (10 Years)                                            |              | X            |              |              | X            |              |
| Other musculoskeletal disorders          | Male   | Cholesterol (total, mean per capita)                                        |              | X            |              |              | X            |              |

Appendix Table 10: Comparison of GBD 2016 and GBD 2017 covariates and level of covariates used in cause of death modeling

| Cause                           | Sex    | Covariate                                                  | Level 1 2017 | Level 2 2017 | Level 3 2017 | Level 1 2016 | Level 2 2016 | Level 3 2016 |
|---------------------------------|--------|------------------------------------------------------------|--------------|--------------|--------------|--------------|--------------|--------------|
| Other musculoskeletal disorders | Male   | Cumulative Cigarettes (10 Years)                           |              | X            |              |              | X            |              |
| Other musculoskeletal disorders | Female | vegetables unadjusted(g)                                   |              | X            |              |              | X            |              |
| Other musculoskeletal disorders | Male   | vegetables adjusted(g)                                     |              | X            |              |              | X            |              |
| Other musculoskeletal disorders | Male   | Smoking Prevalence                                         |              | X            |              |              | X            |              |
| Other musculoskeletal disorders | Male   | Alcohol (liters per capita)                                |              | X            |              |              | X            |              |
| Other musculoskeletal disorders | Female | Alcohol (liters per capita)                                |              | X            |              |              | X            |              |
| Other musculoskeletal disorders | Male   | Education (years per capita)                               |              | X            |              |              | X            |              |
| Other musculoskeletal disorders | Female | Education (years per capita)                               |              | X            |              |              | X            |              |
| Other musculoskeletal disorders | Male   | LDI (5 per capita)                                         |              | X            |              |              | X            |              |
| Other musculoskeletal disorders | Female | LDI (5 per capita)                                         |              | X            |              |              | X            |              |
| Other musculoskeletal disorders | Male   | Healthcare access and quality index                        |              | X            |              |              | X            |              |
| Other musculoskeletal disorders | Male   | Cumulative Cigarettes (5 Years)                            |              | X            |              |              | X            |              |
| Other musculoskeletal disorders | Female | Smoking Prevalence                                         |              | X            |              |              | X            |              |
| Other musculoskeletal disorders | Female | Cholesterol (total, mean per capita)                       |              | X            |              |              | X            |              |
| Other musculoskeletal disorders | Female | Healthcare access and quality index                        |              | X            |              |              | X            |              |
| Other musculoskeletal disorders | Female | Socio-demographic Index                                    |              |              | X            |              |              | X            |
| Other musculoskeletal disorders | Male   | Socio-demographic Index                                    |              |              | X            |              |              | X            |
| Other musculoskeletal disorders | Female | Mean BMI                                                   | X            |              |              | X            |              |              |
| Other musculoskeletal disorders | Male   | Mean BMI                                                   | X            |              |              | X            |              |              |
| Congenital anomalies            | Male   | Smoking Prevalence (Reproductive Age Standardized)         |              | X            |              |              | X            |              |
| Congenital anomalies            | Female | Outdoor Air Pollution (PM2.5)                              |              |              | X            |              |              | X            |
| Congenital anomalies            | Male   | Outdoor Air Pollution (PM2.5)                              |              |              | X            |              |              | X            |
| Congenital anomalies            | Female | Indoor Air Pollution (All Cooking Fuels)                   |              |              | X            |              |              | X            |
| Congenital anomalies            | Male   | Indoor Air Pollution (All Cooking Fuels)                   |              |              | X            |              |              | X            |
| Congenital anomalies            | Female | Live Births 35+ (proportion)                               | X            |              |              | X            |              |              |
| Congenital anomalies            | Female | In-Facility Delivery (proportion)                          | X            |              |              | X            |              |              |
| Congenital anomalies            | Male   | In-Facility Delivery (proportion)                          | X            |              |              | X            |              |              |
| Congenital anomalies            | Female | Smoking Prevalence (Reproductive Age Standardized)         |              | X            |              |              | X            |              |
| Congenital anomalies            | Female | Antenatal Care (4 visits) Coverage (proportion)            |              | X            |              |              | X            |              |
| Congenital anomalies            | Male   | Antenatal Care (4 visits) Coverage (proportion)            |              | X            |              |              | X            |              |
| Congenital anomalies            | Female | Antenatal Care (1 visit) Coverage (proportion)             |              | X            |              |              | X            |              |
| Congenital anomalies            | Male   | Antenatal Care (1 visit) Coverage (proportion)             |              | X            |              |              | X            |              |
| Congenital anomalies            | Male   | Live Births 35+ (proportion)                               | X            |              |              | X            |              |              |
| Congenital anomalies            | Male   | fruits unadjusted(g)                                       |              |              | X            |              |              | X            |
| Congenital anomalies            | Male   | vegetables unadjusted(g)                                   |              |              | X            |              |              | X            |
| Congenital anomalies            | Female | vegetables unadjusted(g)                                   |              |              | X            |              |              | X            |
| Congenital anomalies            | Male   | Maternal alcohol consumption during pregnancy (proportion) | X            |              |              | X            |              |              |
| Congenital anomalies            | Female | Maternal alcohol consumption during pregnancy (proportion) | X            |              |              | X            |              |              |
| Congenital anomalies            | Male   | Folic acid unadjusted (ug)                                 | X            |              |              | X            |              |              |
| Congenital anomalies            | Female | Folic acid unadjusted (ug)                                 | X            |              |              | X            |              |              |
| Congenital anomalies            | Female | Legality of Abortion                                       |              | X            |              |              | X            |              |
| Congenital anomalies            | Male   | Legality of Abortion                                       |              | X            |              |              | X            |              |
| Congenital anomalies            | Female | Socio-demographic Index                                    |              |              | X            |              |              | X            |
| Congenital anomalies            | Female | fruits unadjusted(g)                                       |              |              | X            |              |              | X            |
| Congenital anomalies            | Male   | Socio-demographic Index                                    |              |              | X            |              |              | X            |
| Congenital anomalies            | Female | Healthcare access and quality index                        |              | X            |              |              | X            |              |
| Congenital anomalies            | Male   | Healthcare access and quality index                        |              | X            |              |              | X            |              |
| Congenital anomalies            | Female | Alcohol (liters per capita)                                |              |              | X            |              |              | X            |
| Congenital anomalies            | Male   | Alcohol (liters per capita)                                |              |              | X            |              |              | X            |
| Neural tube defects             | Male   | vegetables unadjusted(g)                                   |              | X            |              |              | X            |              |
| Neural tube defects             | Female | fruits unadjusted(g)                                       |              | X            |              |              | X            |              |
| Neural tube defects             | Female | Smoking Prevalence (Reproductive Age Standardized)         |              | X            |              |              | X            |              |
| Neural tube defects             | Male   | fruits unadjusted(g)                                       |              | X            |              |              | X            |              |
| Neural tube defects             | Female | vegetables unadjusted(g)                                   |              | X            |              |              | X            |              |
| Neural tube defects             | Female | In-Facility Delivery (proportion)                          | X            |              |              | X            |              |              |
| Neural tube defects             | Male   | Healthcare access and quality index                        |              | X            |              |              | X            |              |
| Neural tube defects             | Male   | Smoking Prevalence (Reproductive Age Standardized)         |              | X            |              |              | X            |              |
| Neural tube defects             | Female | Antenatal Care (4 visits) Coverage (proportion)            |              | X            |              |              | X            |              |
| Neural tube defects             | Male   | Antenatal Care (4 visits) Coverage (proportion)            |              | X            |              |              | X            |              |
| Neural tube defects             | Female | Antenatal Care (1 visit) Coverage (proportion)             |              | X            |              |              | X            |              |
| Neural tube defects             | Male   | Antenatal Care (1 visit) Coverage (proportion)             |              | X            |              |              | X            |              |
| Neural tube defects             | Female | Legality of Abortion                                       |              | X            |              |              | X            |              |
| Neural tube defects             | Male   | Legality of Abortion                                       |              | X            |              |              | X            |              |
| Neural tube defects             | Female | Socio-demographic Index                                    | X            |              |              | X            |              |              |
| Neural tube defects             | Male   | Socio-demographic Index                                    | X            |              |              | X            |              |              |
| Neural tube defects             | Female | Diabetes Age-Standardized Prevalence (proportion)          |              |              | X            |              |              | X            |
| Neural tube defects             | Male   | Diabetes Age-Standardized Prevalence (proportion)          |              |              | X            |              |              | X            |
| Neural tube defects             | Female | Healthcare access and quality index                        |              | X            |              |              | X            |              |
| Neural tube defects             | Male   | Indoor Air Pollution (All Cooking Fuels)                   |              |              | X            |              |              | X            |
| Neural tube defects             | Female | Folic acid unadjusted (ug)                                 | X            |              |              | X            |              |              |
| Neural tube defects             | Male   | Folic acid unadjusted (ug)                                 | X            |              |              | X            |              |              |
| Neural tube defects             | Female | Maternal alcohol consumption during pregnancy (proportion) |              |              | X            |              |              | X            |
| Neural tube defects             | Male   | Maternal alcohol consumption during pregnancy (proportion) |              |              | X            |              |              | X            |
| Neural tube defects             | Female | Indoor Air Pollution (All Cooking Fuels)                   |              |              | X            |              |              | X            |
| Congenital heart anomalies      | Male   | In-Facility Delivery (proportion)                          |              | X            |              |              | X            |              |
| Congenital heart anomalies      | Male   | Skilled Birth Attendance (proportion)                      |              |              | X            |              |              | X            |
| Congenital heart anomalies      | Male   | Alcohol (liters per capita)                                |              |              | X            |              |              | X            |
| Congenital heart anomalies      | Female | Alcohol (liters per capita)                                |              |              | X            |              |              | X            |
| Congenital heart anomalies      | Male   | Healthcare access and quality index                        |              | X            |              |              | X            |              |
| Congenital heart anomalies      | Female | Healthcare access and quality index                        |              | X            |              |              | X            |              |
| Congenital heart anomalies      | Female | Skilled Birth Attendance (proportion)                      |              |              | X            |              |              | X            |
| Congenital heart anomalies      | Female | Diabetes Age-Standardized Prevalence (proportion)          |              |              | X            |              |              | X            |
| Congenital heart anomalies      | Male   | Socio-demographic Index                                    |              | X            |              |              |              | X            |
| Congenital heart anomalies      | Female | Socio-demographic Index                                    |              | X            |              |              |              | X            |
| Congenital heart anomalies      | Male   | Legality of Abortion                                       |              | X            |              |              |              | X            |
| Congenital heart anomalies      | Female | Legality of Abortion                                       |              | X            |              |              |              | X            |
| Congenital heart anomalies      | Male   | Diabetes Age-Standardized Prevalence (proportion)          |              | X            |              |              |              | X            |
| Congenital heart anomalies      | Female | Antenatal Care (1 visit) Coverage (proportion)             |              | X            |              |              |              | X            |
| Congenital heart anomalies      | Male   | Antenatal Care (4 visits) Coverage (proportion)            |              |              | X            |              |              | X            |
| Congenital heart anomalies      | Female | Antenatal Care (4 visits) Coverage (proportion)            |              |              | X            |              |              | X            |
| Congenital heart anomalies      | Female | In-Facility Delivery (proportion)                          |              | X            |              |              | X            |              |
| Congenital heart anomalies      | Male   | Live Births 35+ (proportion)                               |              | X            |              |              |              | X            |
| Congenital heart anomalies      | Female | Live Births 35+ (proportion)                               |              | X            |              |              |              | X            |
| Congenital heart anomalies      | Male   | Smoking Prevalence (Reproductive Age Standardized)         |              | X            |              |              | X            |              |
| Congenital heart anomalies      | Female | Smoking Prevalence (Reproductive Age Standardized)         |              | X            |              |              | X            |              |
| Congenital heart anomalies      | Male   | Maternal alcohol consumption during pregnancy (proportion) | X            |              |              | X            |              |              |
| Congenital heart anomalies      | Male   | Antenatal Care (1 visit) Coverage (proportion)             |              | X            |              |              | X            |              |
| Congenital heart anomalies      | Female | Maternal alcohol consumption during pregnancy (proportion) | X            |              |              | X            |              |              |
| Orofacial clefts                | Male   | fruits unadjusted(g)                                       |              |              | X            |              |              | X            |
| Orofacial clefts                | Female | fruits unadjusted(g)                                       |              |              | X            |              |              | X            |
| Orofacial clefts                | Male   | vegetables unadjusted(g)                                   |              |              | X            |              |              | X            |
| Orofacial clefts                | Female | vegetables unadjusted(g)                                   |              |              | X            |              |              | X            |
| Orofacial clefts                | Male   | Maternal alcohol consumption during pregnancy (proportion) |              | X            |              |              | X            |              |
| Orofacial clefts                | Male   | Indoor Air Pollution (All Cooking Fuels)                   |              |              | X            |              |              | X            |
| Orofacial clefts                | Female | Indoor Air Pollution (All Cooking Fuels)                   |              |              | X            |              |              | X            |
| Orofacial clefts                | Female | Indoor Air Pollution (All Cooking Fuels)                   | X            |              |              | X            |              |              |
| Orofacial clefts                | Female | Indoor Air Pollution (All Cooking Fuels)                   | X            |              |              | X            |              |              |
| Orofacial clefts                | Male   | Skilled Birth Attendance (proportion)                      |              | X            |              |              | X            |              |
| Orofacial clefts                | Male   | Skilled Birth Attendance (proportion)                      |              | X            |              |              | X            |              |
| Orofacial clefts                | Female | Indoor Air Pollution (All Cooking Fuels)                   |              |              | X            |              |              | X            |
| Orofacial clefts                | Female | Smoking Prevalence (Reproductive Age Standardized)         |              | X            |              |              | X            |              |
| Orofacial clefts                | Female | Diabetes Age-Standardized Prevalence (proportion)          |              | X            |              |              | X            |              |
| Orofacial clefts                | Female | Antenatal Care (4 visits) Coverage (proportion)            |              |              | X            |              |              | X            |

Appendix Table 10: Comparison of GBD 2016 and GBD 2017 covariates and level of covariates used in cause of death modeling

| Cause                                         | Sex    | Covariate                                                  | Level 1 2017 | Level 2 2017 | Level 3 2017 | Level 1 2016 | Level 2 2016 | Level 3 2016 |
|-----------------------------------------------|--------|------------------------------------------------------------|--------------|--------------|--------------|--------------|--------------|--------------|
| Orofacial clefts                              | Male   | Antenatal Care (4 visits) Coverage (proportion)            |              |              | X            |              |              | X            |
| Orofacial clefts                              | Female | Antenatal Care (1 visit) Coverage (proportion)             |              |              | X            |              |              | X            |
| Orofacial clefts                              | Male   | Antenatal Care (1 visit) Coverage (proportion)             |              |              | X            |              |              | X            |
| Orofacial clefts                              | Female | Legality of Abortion                                       |              | X            |              |              | X            |              |
| Orofacial clefts                              | Male   | Legality of Abortion                                       |              | X            |              |              | X            |              |
| Orofacial clefts                              | Female | Socio-demographic Index                                    | X            |              |              | X            |              |              |
| Orofacial clefts                              | Male   | Socio-demographic Index                                    | X            |              |              | X            |              |              |
| Orofacial clefts                              | Male   | Folic acid unadjusted (ug)                                 | X            |              |              | X            |              |              |
| Orofacial clefts                              | Male   | Diabetes Age-Standardized Prevalence (proportion)          |              | X            |              |              | X            |              |
| Orofacial clefts                              | Female | Healthcare access and quality index                        |              | X            |              |              | X            |              |
| Orofacial clefts                              | Male   | Healthcare access and quality index                        |              | X            |              |              | X            |              |
| Orofacial clefts                              | Female | Alcohol (liters per capita)                                |              |              | X            |              |              | X            |
| Orofacial clefts                              | Male   | Alcohol (liters per capita)                                |              |              | X            |              |              | X            |
| Orofacial clefts                              | Male   | Smoking Prevalence (Reproductive Age Standardized)         |              | X            |              |              | X            |              |
| Orofacial clefts                              | Female | Maternal alcohol consumption during pregnancy (proportion) |              | X            |              |              | X            |              |
| Down's syndrome                               | Male   | Smoking Prevalence (Reproductive Age Standardized)         |              |              | X            |              |              | X            |
| Down's syndrome                               | Male   | Maternal alcohol consumption during pregnancy (proportion) |              |              | X            |              |              | X            |
| Down's syndrome                               | Male   | Healthcare access and quality index                        |              | X            |              |              | X            |              |
| Down's syndrome                               | Female | Healthcare access and quality index                        |              | X            |              |              | X            |              |
| Down's syndrome                               | Male   | Socio-demographic Index                                    |              | X            |              |              | X            |              |
| Down's syndrome                               | Female | Socio-demographic Index                                    |              | X            |              |              | X            |              |
| Down's syndrome                               | Male   | Legality of Abortion                                       | X            |              |              | X            |              |              |
| Down's syndrome                               | Female | Legality of Abortion                                       | X            |              |              | X            |              |              |
| Down's syndrome                               | Male   | Antenatal Care (1 visit) Coverage (proportion)             |              |              | X            |              |              | X            |
| Down's syndrome                               | Female | Antenatal Care (1 visit) Coverage (proportion)             |              |              | X            |              |              | X            |
| Down's syndrome                               | Male   | Antenatal Care (4 visits) Coverage (proportion)            |              |              | X            |              |              | X            |
| Down's syndrome                               | Female | Antenatal Care (4 visits) Coverage (proportion)            |              |              | X            |              |              | X            |
| Down's syndrome                               | Male   | In-Facility Delivery (proportion)                          |              | X            |              |              | X            |              |
| Down's syndrome                               | Female | In-Facility Delivery (proportion)                          |              | X            |              |              | X            |              |
| Down's syndrome                               | Male   | Live Births 35+ (proportion)                               | X            |              |              | X            |              |              |
| Down's syndrome                               | Female | Live Births 35+ (proportion)                               | X            |              |              | X            |              |              |
| Down's syndrome                               | Male   | Indoor Air Pollution (All Cooking Fuels)                   |              |              | X            |              |              | X            |
| Down's syndrome                               | Female | Indoor Air Pollution (All Cooking Fuels)                   |              |              | X            |              |              | X            |
| Down's syndrome                               | Female | Smoking Prevalence (Reproductive Age Standardized)         |              |              | X            |              |              | X            |
| Down's syndrome                               | Male   | vegetables unadjusted(g)                                   |              |              | X            |              |              | X            |
| Down's syndrome                               | Female | vegetables unadjusted(g)                                   |              |              | X            |              |              | X            |
| Down's syndrome                               | Female | Maternal alcohol consumption during pregnancy (proportion) |              |              | X            |              |              | X            |
| Down's syndrome                               | Female | Live Births 40+ (proportion)                               | X            |              |              | X            |              |              |
| Down's syndrome                               | Male   | Live Births 40+ (proportion)                               | X            |              |              | X            |              |              |
| Other chromosomal abnormalities               | Female | Smoking Prevalence (Reproductive Age Standardized)         |              |              | X            |              |              | X            |
| Other chromosomal abnormalities               | Female | Skilled Birth Attendance (proportion)                      |              |              | X            |              |              | X            |
| Other chromosomal abnormalities               | Male   | Skilled Birth Attendance (proportion)                      |              |              | X            |              |              | X            |
| Other chromosomal abnormalities               | Female | Live Births 40+ (proportion)                               | X            |              |              | X            |              |              |
| Other chromosomal abnormalities               | Male   | Live Births 40+ (proportion)                               | X            |              |              | X            |              |              |
| Other chromosomal abnormalities               | Female | Maternal alcohol consumption during pregnancy (proportion) |              | X            |              |              | X            |              |
| Other chromosomal abnormalities               | Male   | Maternal alcohol consumption during pregnancy (proportion) |              | X            |              |              | X            |              |
| Other chromosomal abnormalities               | Male   | Smoking Prevalence (Reproductive Age Standardized)         |              |              | X            |              |              | X            |
| Other chromosomal abnormalities               | Female | Indoor Air Pollution (All Cooking Fuels)                   |              |              | X            |              |              | X            |
| Other chromosomal abnormalities               | Male   | Indoor Air Pollution (All Cooking Fuels)                   |              |              | X            |              |              | X            |
| Other chromosomal abnormalities               | Female | Live Births 35+ (proportion)                               | X            |              |              | X            |              |              |
| Other chromosomal abnormalities               | Female | In-Facility Delivery (proportion)                          |              | X            |              |              | X            |              |
| Other chromosomal abnormalities               | Male   | In-Facility Delivery (proportion)                          |              | X            |              |              | X            |              |
| Other chromosomal abnormalities               | Female | Antenatal Care (4 visits) Coverage (proportion)            |              | X            |              |              | X            |              |
| Other chromosomal abnormalities               | Male   | Live Births 35+ (proportion)                               | X            |              |              | X            |              |              |
| Other chromosomal abnormalities               | Female | Antenatal Care (1 visit) Coverage (proportion)             |              | X            |              |              | X            |              |
| Other chromosomal abnormalities               | Male   | Alcohol (liters per capita)                                |              |              | X            |              |              | X            |
| Other chromosomal abnormalities               | Female | Alcohol (liters per capita)                                |              |              | X            |              |              | X            |
| Other chromosomal abnormalities               | Male   | LDI (IS per capita)                                        |              | X            |              |              | X            |              |
| Other chromosomal abnormalities               | Female | LDI (IS per capita)                                        |              | X            |              |              | X            |              |
| Other chromosomal abnormalities               | Male   | Antenatal Care (4 visits) Coverage (proportion)            |              | X            |              |              | X            |              |
| Other chromosomal abnormalities               | Female | Healthcare access and quality index                        |              | X            |              |              | X            |              |
| Other chromosomal abnormalities               | Male   | Healthcare access and quality index                        |              | X            |              |              | X            |              |
| Other chromosomal abnormalities               | Male   | Socio-demographic Index                                    |              |              | X            |              |              | X            |
| Other chromosomal abnormalities               | Female | Socio-demographic Index                                    |              |              | X            |              |              | X            |
| Other chromosomal abnormalities               | Male   | Legality of Abortion                                       | X            |              |              | X            |              |              |
| Other chromosomal abnormalities               | Female | Legality of Abortion                                       | X            |              |              | X            |              |              |
| Other chromosomal abnormalities               | Male   | Antenatal Care (1 visit) Coverage (proportion)             |              | X            |              |              | X            |              |
| Congenital musculoskeletal and limb anomalies | Female | Socio-demographic Index                                    |              | X            |              |              | X            |              |
| Congenital musculoskeletal and limb anomalies | Female | Antenatal Care (1 visit) Coverage (proportion)             |              |              | X            |              |              | X            |
| Congenital musculoskeletal and limb anomalies | Male   | Antenatal Care (1 visit) Coverage (proportion)             |              |              | X            |              |              | X            |
| Congenital musculoskeletal and limb anomalies | Female | Legality of Abortion                                       | X            |              |              | X            |              |              |
| Congenital musculoskeletal and limb anomalies | Male   | Legality of Abortion                                       | X            |              |              | X            |              |              |
| Congenital musculoskeletal and limb anomalies | Male   | Antenatal Care (4 visits) Coverage (proportion)            |              |              | X            |              |              | X            |
| Congenital musculoskeletal and limb anomalies | Male   | Socio-demographic Index                                    |              | X            |              |              | X            |              |
| Congenital musculoskeletal and limb anomalies | Female | Alcohol (liters per capita)                                |              |              | X            |              |              | X            |
| Congenital musculoskeletal and limb anomalies | Male   | Diabetes Age-Standardized Prevalence (proportion)          |              | X            |              |              | X            |              |
| Congenital musculoskeletal and limb anomalies | Male   | Alcohol (liters per capita)                                |              |              | X            |              |              | X            |
| Congenital musculoskeletal and limb anomalies | Male   | LDI (IS per capita)                                        |              |              | X            |              |              | X            |
| Congenital musculoskeletal and limb anomalies | Female | LDI (IS per capita)                                        |              |              | X            |              |              | X            |
| Congenital musculoskeletal and limb anomalies | Male   | Healthcare access and quality index                        |              | X            |              |              | X            |              |
| Congenital musculoskeletal and limb anomalies | Female | Healthcare access and quality index                        |              | X            |              |              | X            |              |
| Congenital musculoskeletal and limb anomalies | Female | Antenatal Care (4 visits) Coverage (proportion)            |              |              | X            |              |              | X            |
| Congenital musculoskeletal and limb anomalies | Female | Diabetes Age-Standardized Prevalence (proportion)          |              | X            |              |              | X            |              |
| Congenital musculoskeletal and limb anomalies | Male   | In-Facility Delivery (proportion)                          |              | X            |              |              | X            |              |
| Congenital musculoskeletal and limb anomalies | Male   | Maternal alcohol consumption during pregnancy (proportion) | X            |              |              | X            |              |              |
| Congenital musculoskeletal and limb anomalies | Male   | Indoor Air Pollution (All Cooking Fuels)                   |              | X            |              |              | X            |              |
| Congenital musculoskeletal and limb anomalies | Female | Indoor Air Pollution (All Cooking Fuels)                   |              | X            |              |              | X            |              |
| Congenital musculoskeletal and limb anomalies | Male   | Smoking Prevalence (Reproductive Age Standardized)         |              | X            |              |              | X            |              |
| Congenital musculoskeletal and limb anomalies | Female | Smoking Prevalence (Reproductive Age Standardized)         |              | X            |              |              | X            |              |
| Congenital musculoskeletal and limb anomalies | Male   | fruits unadjusted(g)                                       |              |              | X            |              |              | X            |
| Congenital musculoskeletal and limb anomalies | Female | fruits unadjusted(g)                                       |              |              | X            |              |              | X            |
| Congenital musculoskeletal and limb anomalies | Male   | vegetables unadjusted(g)                                   |              |              | X            |              |              | X            |
| Congenital musculoskeletal and limb anomalies | Female | vegetables unadjusted(g)                                   |              |              | X            |              |              | X            |
| Congenital musculoskeletal and limb anomalies | Female | Maternal alcohol consumption during pregnancy (proportion) | X            |              |              | X            |              |              |
| Congenital musculoskeletal and limb anomalies | Female | In-Facility Delivery (proportion)                          |              | X            |              |              | X            |              |
| Urogenital congenital anomalies               | Female | Socio-demographic Index                                    |              |              | X            |              |              | X            |
| Urogenital congenital anomalies               | Male   | Antenatal Care (1 visit) Coverage (proportion)             |              |              | X            |              |              | X            |
| Urogenital congenital anomalies               | Male   | In-Facility Delivery (proportion)                          |              | X            |              |              | X            |              |
| Urogenital congenital anomalies               | Female | Antenatal Care (4 visits) Coverage (proportion)            |              |              | X            |              |              | X            |
| Urogenital congenital anomalies               | Male   | Alcohol (liters per capita)                                |              |              | X            |              |              | X            |
| Urogenital congenital anomalies               | Male   | Antenatal Care (4 visits) Coverage (proportion)            |              |              | X            |              |              | X            |
| Urogenital congenital anomalies               | Female | Alcohol (liters per capita)                                |              |              | X            |              |              | X            |
| Urogenital congenital anomalies               | Female | Diabetes Age-Standardized Prevalence (proportion)          |              | X            |              |              | X            |              |
| Urogenital congenital anomalies               | Female | LDI (IS per capita)                                        |              |              | X            |              |              | X            |
| Urogenital congenital anomalies               | Male   | Socio-demographic Index                                    |              | X            |              |              | X            |              |
| Urogenital congenital anomalies               | Male   | Healthcare access and quality index                        |              | X            |              |              | X            |              |
| Urogenital congenital anomalies               | Male   | Diabetes Age-Standardized Prevalence (proportion)          |              | X            |              |              | X            |              |
| Urogenital congenital anomalies               | Female | Healthcare access and quality index                        |              | X            |              |              | X            |              |
| Urogenital congenital anomalies               | Female | In-Facility Delivery (proportion)                          |              | X            |              |              | X            |              |
| Urogenital congenital anomalies               | Male   | LDI (IS per capita)                                        |              |              | X            |              |              | X            |
| Urogenital congenital anomalies               | Male   | Indoor Air Pollution (All Cooking Fuels)                   |              | X            |              |              | X            |              |

Appendix Table 10: Comparison of GBD 2016 and GBD 2017 covariates and level of covariates used in cause of death modeling

| Cause                           | Sex    | Covariate                                                  | Level 1 2017 | Level 2 2017 | Level 3 2017 | Level 1 2016 | Level 2 2016 | Level 3 2016 |
|---------------------------------|--------|------------------------------------------------------------|--------------|--------------|--------------|--------------|--------------|--------------|
| Urogenital congenital anomalies | Female | Antenatal Care (1 visit) Coverage (proportion)             |              |              | X            |              |              | X            |
| Urogenital congenital anomalies | Male   | Outdoor Air Pollution (PM2.5)                              |              | X            |              |              | X            |              |
| Urogenital congenital anomalies | Female | Outdoor Air Pollution (PM2.5)                              |              | X            |              |              | X            |              |
| Urogenital congenital anomalies | Male   | Smoking Prevalence (Reproductive Age Standardized)         | X            |              |              | X            |              |              |
| Urogenital congenital anomalies | Female | Smoking Prevalence (Reproductive Age Standardized)         | X            |              |              | X            |              |              |
| Urogenital congenital anomalies | Male   | Maternal alcohol consumption during pregnancy (proportion) | X            |              |              | X            |              |              |
| Urogenital congenital anomalies | Female | Maternal alcohol consumption during pregnancy (proportion) | X            |              |              | X            |              |              |
| Urogenital congenital anomalies | Female | Indoor Air Pollution (All Cooking Fuels)                   |              | X            |              |              | X            |              |
| Digestive congenital anomalies  | Female | Antenatal Care (4 visits) Coverage (proportion)            |              |              | X            |              |              | X            |
| Digestive congenital anomalies  | Male   | Antenatal Care (1 visit) Coverage (proportion)             |              |              | X            |              |              | X            |
| Digestive congenital anomalies  | Female | Antenatal Care (1 visit) Coverage (proportion)             |              |              | X            |              |              | X            |
| Digestive congenital anomalies  | Male   | Socio-demographic Index                                    |              | X            |              |              | X            |              |
| Digestive congenital anomalies  | Female | Socio-demographic Index                                    |              | X            |              |              | X            |              |
| Digestive congenital anomalies  | Male   | Diabetes Age-Standardized Prevalence (proportion)          |              | X            |              |              | X            |              |
| Digestive congenital anomalies  | Female | Healthcare access and quality index                        |              | X            |              |              | X            |              |
| Digestive congenital anomalies  | Male   | Healthcare access and quality index                        |              | X            |              |              | X            |              |
| Digestive congenital anomalies  | Male   | LDI (IS per capita)                                        |              |              | X            |              |              | X            |
| Digestive congenital anomalies  | Female | LDI (IS per capita)                                        |              |              | X            |              |              | X            |
| Digestive congenital anomalies  | Male   | Alcohol (liters per capita)                                |              |              | X            |              |              | X            |
| Digestive congenital anomalies  | Female | Alcohol (liters per capita)                                |              |              | X            |              |              | X            |
| Digestive congenital anomalies  | Female | Diabetes Age-Standardized Prevalence (proportion)          |              | X            |              |              | X            |              |
| Digestive congenital anomalies  | Female | In-Facility Delivery (proportion)                          |              | X            |              |              | X            |              |
| Digestive congenital anomalies  | Male   | Antenatal Care (4 visits) Coverage (proportion)            |              |              | X            |              |              | X            |
| Digestive congenital anomalies  | Female | Indoor Air Pollution (All Cooking Fuels)                   |              | X            |              |              | X            |              |
| Digestive congenital anomalies  | Female | Prevalence of obesity (age-standardized)                   |              | X            |              |              | X            |              |
| Digestive congenital anomalies  | Male   | Prevalence of obesity (age-standardized)                   |              | X            |              |              | X            |              |
| Digestive congenital anomalies  | Male   | In-Facility Delivery (proportion)                          |              | X            |              |              | X            |              |
| Digestive congenital anomalies  | Male   | Maternal alcohol consumption during pregnancy (proportion) | X            |              |              | X            |              |              |
| Digestive congenital anomalies  | Male   | Health System Access (capped) vegetables unadjusted(g)     |              |              | X            |              |              | X            |
| Digestive congenital anomalies  | Male   | Maternal alcohol consumption during pregnancy (proportion) | X            |              |              | X            |              | X            |
| Digestive congenital anomalies  | Male   | fruits unadjusted(g)                                       |              |              | X            |              |              | X            |
| Digestive congenital anomalies  | Female | fruits unadjusted(g)                                       |              |              | X            |              |              | X            |
| Digestive congenital anomalies  | Male   | Smoking Prevalence (Reproductive Age Standardized)         | X            |              |              | X            |              |              |
| Digestive congenital anomalies  | Female | Smoking Prevalence (Reproductive Age Standardized)         | X            |              |              | X            |              |              |
| Digestive congenital anomalies  | Male   | Indoor Air Pollution (All Cooking Fuels)                   |              | X            |              |              | X            |              |
| Digestive congenital anomalies  | Female | vegetables unadjusted(g)                                   |              |              | X            |              |              | X            |
| Digestive congenital anomalies  | Female | Health System Access (capped)                              |              |              | X            |              |              | X            |
| Other congenital anomalies      | Female | Socio-demographic Index                                    |              |              | X            |              |              | X            |
| Other congenital anomalies      | Male   | Socio-demographic Index                                    |              |              | X            |              |              | X            |
| Other congenital anomalies      | Female | LDI (IS per capita)                                        |              |              | X            |              |              | X            |
| Other congenital anomalies      | Female | Diabetes Age-Standardized Prevalence (proportion)          |              |              | X            |              |              | X            |
| Other congenital anomalies      | Male   | Healthcare access and quality index                        |              | X            |              |              | X            |              |
| Other congenital anomalies      | Female | Healthcare access and quality index                        |              | X            |              |              | X            |              |
| Other congenital anomalies      | Male   | LDI (IS per capita)                                        |              |              | X            |              |              | X            |
| Other congenital anomalies      | Male   | Alcohol (liters per capita)                                |              |              | X            |              |              | X            |
| Other congenital anomalies      | Female | Alcohol (liters per capita)                                |              |              | X            |              |              | X            |
| Other congenital anomalies      | Male   | Diabetes Age-Standardized Prevalence (proportion)          |              |              | X            |              |              | X            |
| Other congenital anomalies      | Female | Legality of Abortion                                       |              | X            |              |              | X            |              |
| Other congenital anomalies      | Female | In-Facility Delivery (proportion)                          |              | X            |              |              | X            |              |
| Other congenital anomalies      | Female | Antenatal Care (1 visit) Coverage (proportion)             |              |              | X            |              |              | X            |
| Other congenital anomalies      | Male   | Maternal alcohol consumption during pregnancy (proportion) | X            |              |              | X            |              |              |
| Other congenital anomalies      | Female | Maternal alcohol consumption during pregnancy (proportion) | X            |              |              | X            |              |              |
| Other congenital anomalies      | Male   | Smoking Prevalence (Reproductive Age Standardized)         |              | X            |              |              | X            |              |
| Other congenital anomalies      | Female | Smoking Prevalence (Reproductive Age Standardized)         |              | X            |              |              | X            |              |
| Other congenital anomalies      | Female | Indoor Air Pollution (All Cooking Fuels)                   |              | X            |              |              | X            |              |
| Other congenital anomalies      | Male   | Live Births 35+ (proportion)                               | X            |              |              | X            |              |              |
| Other congenital anomalies      | Male   | Indoor Air Pollution (All Cooking Fuels)                   |              | X            |              |              | X            |              |
| Other congenital anomalies      | Male   | In-Facility Delivery (proportion)                          |              | X            |              |              | X            |              |
| Other congenital anomalies      | Male   | Antenatal Care (4 visits) Coverage (proportion)            |              |              | X            |              |              | X            |
| Other congenital anomalies      | Female | Antenatal Care (4 visits) Coverage (proportion)            |              |              | X            |              |              | X            |
| Other congenital anomalies      | Male   | Antenatal Care (1 visit) Coverage (proportion)             |              |              | X            |              |              | X            |
| Other congenital anomalies      | Female | Live Births 35+ (proportion)                               | X            |              |              | X            |              |              |
| Other congenital anomalies      | Male   | Legality of Abortion                                       |              | X            |              |              | X            |              |
| Skin and subcutaneous diseases  | Female | Socio-demographic Index                                    |              |              | X            |              |              | X            |
| Skin and subcutaneous diseases  | Male   | Improved Water Source (proportion with access)             | X            |              |              | X            |              |              |
| Skin and subcutaneous diseases  | Female | Cumulative Cigarettes (10 Years)                           |              | X            |              |              | X            |              |
| Skin and subcutaneous diseases  | Male   | Cumulative Cigarettes (10 Years)                           |              | X            |              |              | X            |              |
| Skin and subcutaneous diseases  | Female | Smoking Prevalence                                         |              | X            |              |              | X            |              |
| Skin and subcutaneous diseases  | Male   | Smoking Prevalence                                         |              | X            |              |              | X            |              |
| Skin and subcutaneous diseases  | Female | Education (years per capita)                               |              |              | X            |              |              | X            |
| Skin and subcutaneous diseases  | Female | Healthcare access and quality index                        |              | X            |              |              | X            |              |
| Skin and subcutaneous diseases  | Male   | Healthcare access and quality index                        |              | X            |              |              | X            |              |
| Skin and subcutaneous diseases  | Female | LDI (IS per capita)                                        |              |              | X            |              |              | X            |
| Skin and subcutaneous diseases  | Male   | LDI (IS per capita)                                        |              |              | X            |              |              | X            |
| Skin and subcutaneous diseases  | Female | Improved Water Source (proportion with access)             | X            |              |              | X            |              |              |
| Skin and subcutaneous diseases  | Male   | Education (years per capita)                               |              |              | X            |              |              | X            |
| Skin and subcutaneous diseases  | Male   | Socio-demographic Index                                    |              |              | X            |              |              | X            |
| Skin and subcutaneous diseases  | Male   | SEV unsafe sanitation                                      | X            |              |              | X            |              |              |
| Skin and subcutaneous diseases  | Female | SEV unsafe sanitation                                      | X            |              |              | X            |              |              |
| Skin and subcutaneous diseases  | Male   | Alcohol (liters per capita)                                |              | X            |              |              | X            |              |
| Skin and subcutaneous diseases  | Male   | Cumulative Cigarettes (5 Years)                            |              | X            |              |              | X            |              |
| Skin and subcutaneous diseases  | Female | Cumulative Cigarettes (5 Years)                            |              | X            |              |              | X            |              |
| Skin and subcutaneous diseases  | Female | Alcohol (liters per capita)                                |              |              | X            |              | X            |              |
| Cellulitis                      | Female | Healthcare access and quality index                        |              | X            |              |              | X            |              |
| Cellulitis                      | Male   | Healthcare access and quality index                        |              | X            |              |              | X            |              |
| Cellulitis                      | Female | LDI (IS per capita)                                        |              |              | X            |              |              | X            |
| Cellulitis                      | Male   | LDI (IS per capita)                                        |              |              | X            |              |              | X            |
| Cellulitis                      | Female | Education (years per capita)                               |              |              | X            |              |              | X            |
| Cellulitis                      | Male   | Education (years per capita)                               |              |              | X            |              |              | X            |
| Pyoderma                        | Female | Healthcare access and quality index                        |              | X            |              |              | X            |              |
| Pyoderma                        | Male   | LDI (IS per capita)                                        |              |              | X            |              |              | X            |
| Pyoderma                        | Female | LDI (IS per capita)                                        |              |              | X            |              |              | X            |
| Pyoderma                        | Male   | Education (years per capita)                               |              |              | X            |              |              | X            |
| Pyoderma                        | Female | Education (years per capita)                               |              |              | X            |              |              | X            |
| Pyoderma                        | Male   | Socio-demographic Index                                    |              |              | X            |              |              | X            |
| Pyoderma                        | Male   | Cumulative Cigarettes (5 Years)                            |              | X            |              |              | X            |              |
| Pyoderma                        | Female | Cumulative Cigarettes (5 Years)                            |              | X            |              |              | X            |              |
| Pyoderma                        | Male   | SEV unsafe sanitation                                      | X            |              |              | X            |              |              |
| Pyoderma                        | Female | SEV unsafe sanitation                                      | X            |              |              | X            |              |              |
| Pyoderma                        | Male   | Improved Water Source (proportion with access)             | X            |              |              | X            |              |              |
| Pyoderma                        | Female | Improved Water Source (proportion with access)             | X            |              |              | X            |              |              |
| Pyoderma                        | Male   | Cumulative Cigarettes (10 Years)                           |              | X            |              |              | X            |              |
| Pyoderma                        | Female | Cumulative Cigarettes (10 Years)                           |              | X            |              |              | X            |              |
| Pyoderma                        | Male   | Smoking Prevalence                                         |              | X            |              |              | X            |              |
| Pyoderma                        | Female | Smoking Prevalence                                         |              | X            |              |              | X            |              |
| Pyoderma                        | Male   | Alcohol (liters per capita)                                |              |              | X            |              | X            |              |
| Pyoderma                        | Female | Alcohol (liters per capita)                                |              |              | X            |              | X            |              |
| Pyoderma                        | Male   | Healthcare access and quality index                        |              |              | X            |              | X            |              |
| Pyoderma                        | Female | Socio-demographic Index                                    |              |              | X            |              |              | X            |
| Decubitus ulcer                 | Female | Diabetes Fasting Plasma Glucose (mmol/L)                   | X            |              |              | X            |              |              |
| Decubitus ulcer                 | Female | LDI (IS per capita)                                        |              |              | X            |              |              | X            |
| Decubitus ulcer                 | Male   | Healthcare access and quality index                        |              |              | X            |              | X            |              |
| Decubitus ulcer                 | Female | Healthcare access and quality index                        |              |              | X            |              | X            |              |
| Decubitus ulcer                 | Male   | Health System Access 2 (unfika)                            |              |              | X            |              |              | X            |

Appendix Table 10: Comparison of GBD 2016 and GBD 2017 covariates and level of covariates used in cause of death modeling

| Cause                                | Sex    | Covariate                                              | Level 1 2017 | Level 2 2017 | Level 3 2017 | Level 1 2016 | Level 2 2016 | Level 3 2016 |
|--------------------------------------|--------|--------------------------------------------------------|--------------|--------------|--------------|--------------|--------------|--------------|
| Decubitus ulcer                      | Female | Health System Access 2 (unitless)                      |              |              | X            |              |              | X            |
| Decubitus ulcer                      | Male   | Socio-demographic Index                                |              |              | X            |              |              | X            |
| Decubitus ulcer                      | Female | SEV unsafe sanitation                                  |              |              | X            |              |              | X            |
| Decubitus ulcer                      | Male   | Cumulative Cigarettes (5 Years)                        |              | X            |              |              | X            |              |
| Decubitus ulcer                      | Female | Cumulative Cigarettes (5 Years)                        |              | X            |              |              | X            |              |
| Decubitus ulcer                      | Male   | Prevalence of obesity                                  | X            |              |              | X            |              |              |
| Decubitus ulcer                      | Female | Prevalence of obesity                                  | X            |              |              | X            |              |              |
| Decubitus ulcer                      | Male   | SEV unsafe sanitation                                  |              |              | X            |              |              | X            |
| Decubitus ulcer                      | Female | Improved Water Source (proportion with access)         | X            |              |              | X            |              |              |
| Decubitus ulcer                      | Male   | Improved Water Source (proportion with access)         | X            |              |              | X            |              |              |
| Decubitus ulcer                      | Female | Cumulative Cigarettes (10 Years)                       |              | X            |              |              | X            |              |
| Decubitus ulcer                      | Male   | Cumulative Cigarettes (10 Years)                       |              | X            |              |              | X            |              |
| Decubitus ulcer                      | Female | Smoking Prevalence                                     |              | X            |              |              | X            |              |
| Decubitus ulcer                      | Male   | Smoking Prevalence                                     |              | X            |              |              | X            |              |
| Decubitus ulcer                      | Male   | Diabetes Fasting Plasma Glucose (mmol/L)               | X            |              |              | X            |              |              |
| Decubitus ulcer                      | Male   | LDI (5 per capita)                                     |              |              | X            |              |              | X            |
| Decubitus ulcer                      | Female | Socio-demographic Index                                |              |              | X            |              |              | X            |
| Decubitus ulcer                      | Male   | Education (years per capita)                           |              |              | X            |              |              | X            |
| Decubitus ulcer                      | Female | Alcohol (liters per capita)                            |              | X            |              |              | X            |              |
| Decubitus ulcer                      | Male   | Alcohol (liters per capita)                            |              | X            |              |              | X            |              |
| Decubitus ulcer                      | Female | Education (years per capita)                           |              | X            |              |              | X            |              |
| Other skin and subcutaneous diseases | Female | Healthcare access and quality index                    |              | X            |              |              | X            |              |
| Other skin and subcutaneous diseases | Male   | Alcohol (liters per capita)                            |              | X            |              |              | X            |              |
| Other skin and subcutaneous diseases | Female | Cumulative Cigarettes (5 Years)                        |              | X            |              |              | X            |              |
| Other skin and subcutaneous diseases | Male   | Healthcare access and quality index                    |              | X            |              |              | X            |              |
| Other skin and subcutaneous diseases | Female | LDI (5 per capita)                                     |              |              | X            |              |              | X            |
| Other skin and subcutaneous diseases | Male   | Cumulative Cigarettes (5 Years)                        |              | X            |              |              | X            |              |
| Other skin and subcutaneous diseases | Female | SEV unsafe sanitation                                  | X            |              |              | X            |              |              |
| Other skin and subcutaneous diseases | Male   | SEV unsafe sanitation                                  | X            |              |              | X            |              |              |
| Other skin and subcutaneous diseases | Female | Improved Water Source (proportion with access)         | X            |              |              | X            |              |              |
| Other skin and subcutaneous diseases | Male   | Improved Water Source (proportion with access)         | X            |              |              | X            |              |              |
| Other skin and subcutaneous diseases | Female | Smoking Prevalence                                     |              | X            |              |              | X            |              |
| Other skin and subcutaneous diseases | Male   | Cumulative Cigarettes (10 Years)                       |              | X            |              |              | X            |              |
| Other skin and subcutaneous diseases | Male   | Smoking Prevalence                                     |              | X            |              |              | X            |              |
| Other skin and subcutaneous diseases | Female | Socio-demographic Index                                |              |              | X            |              |              | X            |
| Other skin and subcutaneous diseases | Male   | Socio-demographic Index                                |              |              | X            |              |              | X            |
| Other skin and subcutaneous diseases | Female | Health System Access 2 (unitless)                      |              |              | X            |              |              | X            |
| Other skin and subcutaneous diseases | Male   | Alcohol (liters per capita)                            |              | X            |              |              | X            |              |
| Other skin and subcutaneous diseases | Female | Education (years per capita)                           |              | X            |              |              | X            |              |
| Other skin and subcutaneous diseases | Male   | Education (years per capita)                           |              | X            |              |              | X            |              |
| Other skin and subcutaneous diseases | Female | Cumulative Cigarettes (10 Years)                       |              | X            |              |              | X            |              |
| Other skin and subcutaneous diseases | Male   | LDI (5 per capita)                                     |              | X            |              |              | X            |              |
| Sudden infant death syndrome         | Male   | Socio-demographic Index                                |              |              | X            |              |              | X            |
| Sudden infant death syndrome         | Male   | Healthcare access and quality index                    |              | X            |              |              | X            |              |
| Sudden infant death syndrome         | Male   | LDI (5 per capita)                                     |              |              | X            |              |              | X            |
| Sudden infant death syndrome         | Female | Socio-demographic Index                                |              |              | X            |              |              | X            |
| Sudden infant death syndrome         | Male   | In-Facility Delivery (proportion)                      | X            |              |              | X            |              |              |
| Sudden infant death syndrome         | Female | In-Facility Delivery (proportion)                      | X            |              |              | X            |              |              |
| Sudden infant death syndrome         | Male   | Skilled Birth Attendance (proportion)                  |              | X            |              |              | X            |              |
| Sudden infant death syndrome         | Female | Skilled Birth Attendance (proportion)                  |              | X            |              |              | X            |              |
| Sudden infant death syndrome         | Male   | Health System Access (capped)                          |              | X            |              |              | X            |              |
| Sudden infant death syndrome         | Male   | Underweight (proportion <2SD weight for age, <5 years) |              | X            |              |              | X            |              |
| Sudden infant death syndrome         | Female | Underweight (proportion <2SD weight for age, <5 years) |              | X            |              |              | X            |              |
| Sudden infant death syndrome         | Male   | Total Fertility Rate                                   |              |              | X            |              |              | X            |
| Sudden infant death syndrome         | Female | Total Fertility Rate                                   |              |              | X            |              |              | X            |
| Sudden infant death syndrome         | Female | LDI (5 per capita)                                     |              |              | X            |              |              | X            |
| Sudden infant death syndrome         | Male   | Education (years per capita)                           |              | X            |              |              | X            |              |
| Sudden infant death syndrome         | Female | Education (years per capita)                           |              | X            |              |              | X            |              |
| Transport injuries                   | Female | Rainfall Quintile 5 (proportion)                       |              |              | X            |              |              | X            |
| Transport injuries                   | Male   | Socio-demographic Index                                |              |              | X            |              |              | X            |
| Transport injuries                   | Female | Alcohol (liters per capita)                            | X            |              |              | X            |              |              |
| Transport injuries                   | Male   | Alcohol (liters per capita)                            | X            |              |              | X            |              |              |
| Transport injuries                   | Female | Education (years per capita)                           |              |              | X            |              |              | X            |
| Transport injuries                   | Male   | Education (years per capita)                           |              |              | X            |              |              | X            |
| Transport injuries                   | Female | LDI (5 per capita)                                     |              | X            |              |              | X            |              |
| Transport injuries                   | Female | Healthcare access and quality index                    |              | X            |              |              | X            |              |
| Transport injuries                   | Male   | Healthcare access and quality index                    |              | X            |              |              | X            |              |
| Transport injuries                   | Female | Socio-demographic Index                                |              |              | X            |              |              | X            |
| Transport injuries                   | Male   | LDI (5 per capita)                                     |              | X            |              |              | X            |              |
| Transport injuries                   | Female | Vehicles - 2 wheels fraction (proportion)              | X            |              |              | X            |              |              |
| Transport injuries                   | Male   | Vehicles - 2+4 wheels (per capita)                     | X            |              |              | X            |              |              |
| Transport injuries                   | Female | Vehicles - 2+4 wheels (per capita)                     | X            |              |              | X            |              |              |
| Transport injuries                   | Male   | Population Density (500-1000 ppl/sqkm, proportion)     |              | X            |              |              | X            |              |
| Transport injuries                   | Female | Population Density (500-1000 ppl/sqkm, proportion)     |              | X            |              |              | X            |              |
| Transport injuries                   | Male   | Population Density (300-500 ppl/sqkm, proportion)      |              | X            |              |              | X            |              |
| Transport injuries                   | Female | Population Density (300-500 ppl/sqkm, proportion)      |              | X            |              |              | X            |              |
| Transport injuries                   | Male   | Vehicles - 2 wheels fraction (proportion)              | X            |              |              | X            |              |              |
| Transport injuries                   | Male   | Rainfall Quintile 5 (proportion)                       |              |              | X            |              |              | X            |
| Road injuries                        | Male   | Healthcare access and quality index                    |              | X            |              |              | X            |              |
| Road injuries                        | Female | Population Density (300-500 ppl/sqkm, proportion)      |              | X            |              |              | X            |              |
| Road injuries                        | Male   | Population Density (300-500 ppl/sqkm, proportion)      |              | X            |              |              | X            |              |
| Road injuries                        | Female | Vehicles - 4 wheels (per capita)                       | X            |              |              | X            |              |              |
| Road injuries                        | Male   | Vehicles - 4 wheels (per capita)                       | X            |              |              | X            |              |              |
| Road injuries                        | Female | Vehicles - 2 wheels (per capita)                       | X            |              |              | X            |              |              |
| Road injuries                        | Female | Socio-demographic Index                                |              |              | X            |              |              | X            |
| Road injuries                        | Female | Population 15 to 30 (proportion)                       |              | X            |              |              | X            |              |
| Road injuries                        | Male   | Population 15 to 30 (proportion)                       |              | X            |              |              | X            |              |
| Road injuries                        | Male   | Population Density (500-1000 ppl/sqkm, proportion)     |              | X            |              |              | X            |              |
| Road injuries                        | Male   | Socio-demographic Index                                |              |              | X            |              |              | X            |
| Road injuries                        | Female | Healthcare access and quality index                    |              | X            |              |              | X            |              |
| Road injuries                        | Male   | Vehicles - 2 wheels (per capita)                       | X            |              |              | X            |              |              |
| Road injuries                        | Female | Population Density (500-1000 ppl/sqkm, proportion)     |              | X            |              |              | X            |              |
| Road injuries                        | Male   | Education (years per capita)                           | X            |              |              | X            |              |              |
| Road injuries                        | Female | Vehicles - 2+4 wheels (per capita)                     | X            |              |              | X            |              |              |
| Road injuries                        | Male   | Log-transformed SEV scalar: Road Inj                   | X            |              |              | X            |              |              |
| Road injuries                        | Female | Alcohol (liters per capita)                            | X            |              |              | X            |              |              |
| Road injuries                        | Female | Alcohol (liters per capita)                            | X            |              |              | X            |              |              |
| Road injuries                        | Male   | Vehicles - 2+4 wheels (per capita)                     | X            |              |              | X            |              |              |
| Road injuries                        | Female | Education (years per capita)                           |              | X            |              |              | X            |              |
| Road injuries                        | Female | LDI (5 per capita)                                     |              | X            |              |              | X            |              |
| Road injuries                        | Female | Vehicles - 2 wheels fraction (proportion)              | X            |              |              | X            |              |              |
| Road injuries                        | Male   | Vehicles - 2 wheels fraction (proportion)              | X            |              |              | X            |              |              |
| Road injuries                        | Male   | Log-transformed SEV scalar: Road Inj                   | X            |              |              | X            |              |              |
| Road injuries                        | Male   | LDI (5 per capita)                                     |              | X            |              |              | X            |              |
| Pedestrian road injuries             | Male   | Vehicles - 2 wheels fraction (proportion)              | X            |              |              | X            |              |              |
| Pedestrian road injuries             | Female | Vehicles - 2 wheels fraction (proportion)              | X            |              |              | X            |              |              |
| Pedestrian road injuries             | Male   | Vehicles - 2+4 wheels (per capita)                     | X            |              |              | X            |              |              |
| Pedestrian road injuries             | Male   | Socio-demographic Index                                |              |              | X            |              |              | X            |
| Pedestrian road injuries             | Female | Population Density (500-1000 ppl/sqkm, proportion)     |              | X            |              |              | X            |              |
| Pedestrian road injuries             | Male   | Population Density (300-500 ppl/sqkm, proportion)      |              | X            |              |              | X            |              |
| Pedestrian road injuries             | Female | Population Density (300-500 ppl/sqkm, proportion)      |              | X            |              |              | X            |              |
| Pedestrian road injuries             | Male   | Alcohol (liters per capita)                            | X            |              |              | X            |              |              |
| Pedestrian road injuries             | Male   | Rainfall Quintile 5 (proportion)                       |              |              | X            |              |              | X            |
| Pedestrian road injuries             | Male   | Log-transformed SEV scalar: Pedest                     | X            |              |              | X            |              |              |
| Pedestrian road injuries             | Female | Log-transformed SEV scalar: Pedest                     | X            |              |              | X            |              |              |
| Pedestrian road injuries             | Female | Alcohol (liters per capita)                            | X            |              |              | X            |              |              |
| Pedestrian road injuries             | Female | Education (years per capita)                           |              | X            |              |              | X            |              |
| Pedestrian road injuries             | Male   | Education (years per capita)                           |              | X            |              |              | X            |              |
| Pedestrian road injuries             | Female | LDI (5 per capita)                                     |              | X            |              |              | X            |              |

Appendix Table 10: Comparison of GBD 2016 and GBD 2017 covariates and level of covariates used in cause of death modeling

| Cause                       | Sex    | Covariate                                              | Level 1 2017 | Level 2 2017 | Level 3 2017 | Level 1 2016 | Level 2 2016 | Level 3 2016 |
|-----------------------------|--------|--------------------------------------------------------|--------------|--------------|--------------|--------------|--------------|--------------|
| Pedestrian road injuries    | Male   | LDI (IS per capita)                                    |              | X            |              |              | X            |              |
| Pedestrian road injuries    | Female | Healthcare access and quality index                    |              | X            |              |              | X            |              |
| Pedestrian road injuries    | Male   | Healthcare access and quality index                    |              | X            |              |              | X            |              |
| Pedestrian road injuries    | Female | Rainfall Quintile 5 (proportion)                       |              |              | X            |              |              | X            |
| Pedestrian road injuries    | Male   | Population Density (500-1000 ppl/sqkm, proportion)     |              | X            |              |              | X            |              |
| Pedestrian road injuries    | Female | Vehicles - 2+4 wheels (per capita)                     | X            |              |              | X            |              |              |
| Pedestrian road injuries    | Female | Socio-demographic Index                                |              |              | X            |              |              | X            |
| Cyclist road injuries       | Male   | Education (years per capita)                           |              |              | X            |              |              | X            |
| Cyclist road injuries       | Female | Healthcare access and quality index                    |              | X            |              |              | X            |              |
| Cyclist road injuries       | Male   | Healthcare access and quality index                    |              | X            |              |              | X            |              |
| Cyclist road injuries       | Female | Alcohol (liters per capita)                            | X            |              |              | X            |              |              |
| Cyclist road injuries       | Male   | Alcohol (liters per capita)                            | X            |              |              | X            |              |              |
| Cyclist road injuries       | Female | Education (years per capita)                           |              |              | X            |              |              | X            |
| Cyclist road injuries       | Female | Population Density (500-1000 ppl/sqkm, proportion)     |              | X            |              |              | X            |              |
| Cyclist road injuries       | Male   | Population Density (500-1000 ppl/sqkm, proportion)     |              | X            |              |              | X            |              |
| Cyclist road injuries       | Female | Vehicles - 2+4 wheels (per capita)                     | X            |              |              | X            |              |              |
| Cyclist road injuries       | Male   | Vehicles - 2+4 wheels (per capita)                     | X            |              |              | X            |              |              |
| Cyclist road injuries       | Male   | Vehicles - 2 wheels fraction (proportion)              | X            |              |              | X            |              |              |
| Cyclist road injuries       | Female | Log-transformed SEV scalar: Cyclist                    | X            |              |              | X            |              |              |
| Cyclist road injuries       | Male   | Log-transformed SEV scalar: Cyclist                    | X            |              |              | X            |              |              |
| Cyclist road injuries       | Female | Socio-demographic Index                                |              |              | X            |              |              | X            |
| Cyclist road injuries       | Male   | LDI (IS per capita)                                    |              | X            |              |              | X            |              |
| Cyclist road injuries       | Male   | Socio-demographic Index                                |              |              | X            |              |              | X            |
| Cyclist road injuries       | Female | Population Density (300-500 ppl/sqkm, proportion)      |              | X            |              |              | X            |              |
| Cyclist road injuries       | Male   | Population Density (300-500 ppl/sqkm, proportion)      |              | X            |              |              | X            |              |
| Cyclist road injuries       | Female | Vehicles - 2 wheels fraction (proportion)              | X            |              |              | X            |              |              |
| Cyclist road injuries       | Female | LDI (IS per capita)                                    |              | X            |              |              | X            |              |
| Motorcyclist road injuries  | Female | Rainfall Quintile 5 (proportion)                       |              |              | X            |              |              | X            |
| Motorcyclist road injuries  | Male   | LDI (IS per capita)                                    |              | X            |              |              | X            |              |
| Motorcyclist road injuries  | Female | Education (years per capita)                           |              |              | X            |              |              | X            |
| Motorcyclist road injuries  | Male   | Education (years per capita)                           |              |              | X            |              |              | X            |
| Motorcyclist road injuries  | Female | LDI (IS per capita)                                    |              | X            |              |              | X            |              |
| Motorcyclist road injuries  | Male   | Rainfall Quintile 5 (proportion)                       |              |              | X            |              |              | X            |
| Motorcyclist road injuries  | Female | Healthcare access and quality index                    |              | X            |              |              | X            |              |
| Motorcyclist road injuries  | Male   | Healthcare access and quality index                    |              | X            |              |              | X            |              |
| Motorcyclist road injuries  | Female | Socio-demographic Index                                |              |              | X            |              |              | X            |
| Motorcyclist road injuries  | Male   | Socio-demographic Index                                |              |              | X            |              |              | X            |
| Motorcyclist road injuries  | Female | Vehicles - 2 wheels (per capita)                       | X            |              |              | X            |              |              |
| Motorcyclist road injuries  | Male   | Vehicles - 2 wheels (per capita)                       | X            |              |              | X            |              |              |
| Motorcyclist road injuries  | Female | Population Density (300-500 ppl/sqkm, proportion)      |              | X            |              |              | X            |              |
| Motorcyclist road injuries  | Male   | Alcohol (liters per capita)                            | X            |              |              | X            |              |              |
| Motorcyclist road injuries  | Male   | Population Density (300-500 ppl/sqkm, proportion)      |              | X            |              |              | X            |              |
| Motorcyclist road injuries  | Male   | Population Density (500-1000 ppl/sqkm, proportion)     |              | X            |              |              | X            |              |
| Motorcyclist road injuries  | Female | Log-transformed SEV scalar: Mot Cyc                    | X            |              |              | X            |              |              |
| Motorcyclist road injuries  | Male   | Log-transformed SEV scalar: Mot Cyc                    | X            |              |              | X            |              |              |
| Motorcyclist road injuries  | Female | Population Density (500-1000 ppl/sqkm, proportion)     |              | X            |              |              | X            |              |
| Motorcyclist road injuries  | Female | Alcohol (liters per capita)                            | X            |              |              | X            |              |              |
| Motor vehicle road injuries | Male   | Population Density (500-1000 ppl/sqkm, proportion)     |              | X            |              |              | X            |              |
| Motor vehicle road injuries | Female | Log-transformed SEV scalar: Mot Veh                    | X            |              |              | X            |              |              |
| Motor vehicle road injuries | Male   | Log-transformed SEV scalar: Mot Veh                    | X            |              |              | X            |              |              |
| Motor vehicle road injuries | Female | Population Density (500-1000 ppl/sqkm, proportion)     |              | X            |              |              | X            |              |
| Motor vehicle road injuries | Male   | Population Density (300-500 ppl/sqkm, proportion)      |              | X            |              |              | X            |              |
| Motor vehicle road injuries | Female | Population Density (300-500 ppl/sqkm, proportion)      |              | X            |              |              | X            |              |
| Motor vehicle road injuries | Male   | Vehicles - 4 wheels (per capita)                       | X            |              |              | X            |              |              |
| Motor vehicle road injuries | Female | Vehicles - 4 wheels (per capita)                       | X            |              |              | X            |              |              |
| Motor vehicle road injuries | Male   | Rainfall Quintile 5 (proportion)                       |              |              | X            |              |              | X            |
| Motor vehicle road injuries | Female | Rainfall Quintile 5 (proportion)                       |              |              | X            |              |              | X            |
| Motor vehicle road injuries | Male   | Socio-demographic Index                                |              |              | X            |              |              | X            |
| Motor vehicle road injuries | Female | Socio-demographic Index                                |              |              | X            |              |              | X            |
| Motor vehicle road injuries | Male   | Healthcare access and quality index                    |              | X            |              |              | X            |              |
| Motor vehicle road injuries | Female | Healthcare access and quality index                    |              | X            |              |              | X            |              |
| Motor vehicle road injuries | Male   | LDI (IS per capita)                                    |              |              | X            |              |              | X            |
| Motor vehicle road injuries | Female | LDI (IS per capita)                                    |              |              | X            |              |              | X            |
| Motor vehicle road injuries | Male   | Education (years per capita)                           |              |              | X            |              |              | X            |
| Motor vehicle road injuries | Female | Education (years per capita)                           |              |              | X            |              |              | X            |
| Motor vehicle road injuries | Male   | Alcohol (liters per capita)                            | X            |              |              | X            |              |              |
| Motor vehicle road injuries | Female | Alcohol (liters per capita)                            | X            |              |              | X            |              |              |
| Other road injuries         | Female | Rainfall Quintile 5 (proportion)                       |              |              | X            |              |              | X            |
| Other road injuries         | Male   | Socio-demographic Index                                |              |              | X            |              |              | X            |
| Other road injuries         | Female | Socio-demographic Index                                |              |              | X            |              |              | X            |
| Other road injuries         | Male   | Healthcare access and quality index                    |              | X            |              |              | X            |              |
| Other road injuries         | Female | Healthcare access and quality index                    |              | X            |              |              | X            |              |
| Other road injuries         | Male   | LDI (IS per capita)                                    |              | X            |              |              | X            |              |
| Other road injuries         | Male   | Alcohol (liters per capita)                            | X            |              |              | X            |              |              |
| Other road injuries         | Female | Alcohol (liters per capita)                            | X            |              |              | X            |              |              |
| Other road injuries         | Male   | Rainfall Quintile 5 (proportion)                       |              |              | X            |              |              | X            |
| Other road injuries         | Male   | Log-transformed SEV scalar: Oth Road                   | X            |              |              | X            |              |              |
| Other road injuries         | Female | LDI (IS per capita)                                    |              | X            |              |              | X            |              |
| Other road injuries         | Female | Vehicles - 2+4 wheels (per capita)                     | X            |              |              | X            |              |              |
| Other road injuries         | Female | Log-transformed SEV scalar: Oth Road                   | X            |              |              | X            |              |              |
| Other road injuries         | Female | Vehicles - 2 wheels fraction (proportion)              | X            |              |              | X            |              |              |
| Other road injuries         | Male   | Vehicles - 2 wheels fraction (proportion)              | X            |              |              | X            |              |              |
| Other road injuries         | Male   | Vehicles - 2+4 wheels (per capita)                     | X            |              |              | X            |              |              |
| Other transport injuries    | Male   | LDI (IS per capita)                                    |              |              | X            |              |              | X            |
| Other transport injuries    | Female | Population Density (500-1000 ppl/sqkm, proportion)     |              | X            |              |              | X            |              |
| Other transport injuries    | Male   | Population Density (500-1000 ppl/sqkm, proportion)     |              | X            |              |              | X            |              |
| Other transport injuries    | Female | Vehicles - 2+4 wheels (per capita)                     | X            |              |              | X            |              |              |
| Other transport injuries    | Female | Vehicles - 2 wheels fraction (proportion)              | X            |              |              | X            |              |              |
| Other transport injuries    | Male   | Vehicles - 2 wheels fraction (proportion)              | X            |              |              | X            |              |              |
| Other transport injuries    | Female | Log-transformed SEV scalar: Oth Trans                  | X            |              |              | X            |              |              |
| Other transport injuries    | Male   | Log-transformed SEV scalar: Oth Trans                  | X            |              |              | X            |              |              |
| Other transport injuries    | Female | Alcohol (liters per capita)                            | X            |              |              | X            |              |              |
| Other transport injuries    | Male   | Alcohol (liters per capita)                            | X            |              |              | X            |              |              |
| Other transport injuries    | Male   | Vehicles - 2+4 wheels (per capita)                     | X            |              |              | X            |              |              |
| Other transport injuries    | Male   | Population Density (300-500 ppl/sqkm, proportion)      |              | X            |              |              | X            |              |
| Other transport injuries    | Female | LDI (IS per capita)                                    |              |              | X            |              |              | X            |
| Other transport injuries    | Male   | Education (years per capita)                           |              |              | X            |              |              | X            |
| Other transport injuries    | Female | Healthcare access and quality index                    |              | X            |              |              | X            |              |
| Other transport injuries    | Male   | Healthcare access and quality index                    |              | X            |              |              | X            |              |
| Other transport injuries    | Female | Socio-demographic Index                                |              |              | X            |              |              | X            |
| Other transport injuries    | Female | Education (years per capita)                           |              |              | X            |              |              | X            |
| Other transport injuries    | Female | Rainfall Quintile 5 (proportion)                       |              |              | X            |              |              | X            |
| Other transport injuries    | Female | Population Density (300-500 ppl/sqkm, proportion)      |              | X            |              |              | X            |              |
| Other transport injuries    | Male   | Rainfall Quintile 5 (proportion)                       |              |              | X            |              |              | X            |
| Other transport injuries    | Male   | Socio-demographic Index                                |              |              | X            |              |              | X            |
| Unintentional injuries      | Male   | Population Density (over 1000 ppl/sqkm, proportion)    |              | X            |              |              | X            |              |
| Unintentional injuries      | Female | Underweight (proportion <2SD weight for age, <5 years) | X            |              |              | X            |              |              |
| Unintentional injuries      | Female | Population Density (over 1000 ppl/sqkm, proportion)    |              | X            |              |              | X            |              |
| Unintentional injuries      | Male   | Population Density (500-1000 ppl/sqkm, proportion)     |              | X            |              |              | X            |              |
| Unintentional injuries      | Female | Population Density (500-1000 ppl/sqkm, proportion)     |              | X            |              |              | X            |              |
| Unintentional injuries      | Male   | Indoor Air Pollution (All Cooking Fuels)               | X            |              |              | X            |              |              |
| Unintentional injuries      | Female | Indoor Air Pollution (All Cooking Fuels)               | X            |              |              | X            |              |              |
| Unintentional injuries      | Male   | Underweight (proportion <2SD weight for age, <5 years) | X            |              |              | X            |              |              |
| Unintentional injuries      | Male   | LDI (IS per capita)                                    |              |              | X            |              |              | X            |
| Unintentional injuries      | Male   | Alcohol (liters per capita)                            |              | X            |              |              | X            |              |
| Unintentional injuries      | Male   | Health System Access 2 (unitless)                      | X            |              |              | X            |              |              |
| Unintentional injuries      | Female | Health System Access 2 (unitless)                      | X            |              |              | X            |              |              |
| Unintentional injuries      | Male   | Education (years per capita)                           |              |              | X            |              |              | X            |

Appendix Table 10: Comparison of GBD 2016 and GBD 2017 covariates and level of covariates used in cause of death modeling

| Cause                               | Sex    | Covariate                                           | Level 1 2017 | Level 2 2017 | Level 3 2017 | Level 1 2016 | Level 2 2016 | Level 3 2016 |
|-------------------------------------|--------|-----------------------------------------------------|--------------|--------------|--------------|--------------|--------------|--------------|
| Unintentional injuries              | Female | Alcohol (liters per capita)                         |              | X            |              |              | X            |              |
| Unintentional injuries              | Male   | Diabetes Fasting Plasma Glucose (mmol/L)            | X            |              |              | X            |              |              |
| Unintentional injuries              | Female | Diabetes Fasting Plasma Glucose (mmol/L)            | X            |              |              | X            |              |              |
| Unintentional injuries              | Male   | Cumulative Cigarettes (5 Years)                     | X            |              |              | X            |              |              |
| Unintentional injuries              | Female | Cumulative Cigarettes (5 Years)                     | X            |              |              | X            |              |              |
| Unintentional injuries              | Female | LDI (IS per capita)                                 |              |              | X            |              |              | X            |
| Unintentional injuries              | Female | Education (years per capita)                        |              |              | X            |              |              | X            |
| Unintentional injuries              | Male   | Smoking Prevalence                                  | X            |              |              | X            |              |              |
| Unintentional injuries              | Female | Smoking Prevalence                                  | X            |              |              | X            |              |              |
| Falls                               | Male   | Healthcare access and quality index                 |              | X            |              |              | X            |              |
| Falls                               | Female | Alcohol (liters per capita)                         | X            |              |              | X            |              |              |
| Falls                               | Male   | Log-transformed SEV scalar: Falls                   | X            |              |              | X            |              |              |
| Falls                               | Female | Log-transformed SEV scalar: Falls                   | X            |              |              | X            |              |              |
| Falls                               | Male   | Socio-demographic Index                             |              |              | X            |              |              | X            |
| Falls                               | Male   | Socio-demographic Index                             |              |              | X            |              |              | X            |
| Falls                               | Female | Socio-demographic Index                             |              |              | X            |              |              | X            |
| Falls                               | Female | Socio-demographic Index                             |              |              | X            |              |              | X            |
| Falls                               | Male   | Alcohol (liters per capita)                         | X            |              |              | X            |              |              |
| Falls                               | Female | Healthcare access and quality index                 |              | X            |              |              | X            |              |
| Falls                               | Male   | Elevation Over 1500m (proportion)                   |              |              | X            |              |              | X            |
| Falls                               | Female | Elevation Over 1500m (proportion)                   |              |              | X            |              |              | X            |
| Falls                               | Male   | LDI (IS per capita)                                 |              |              | X            |              |              | X            |
| Falls                               | Female | LDI (IS per capita)                                 |              |              | X            |              |              | X            |
| Drowning                            | Male   | Socio-demographic Index                             |              |              | X            |              |              | X            |
| Drowning                            | Female | Socio-demographic Index                             |              |              | X            |              |              | X            |
| Drowning                            | Male   | Log-transformed SEV scalar: Drown                   | X            |              |              | X            |              |              |
| Drowning                            | Female | Log-transformed SEV scalar: Drown                   | X            |              |              | X            |              |              |
| Drowning                            | Male   | Landlocked Nation (binary)                          | X            |              |              | X            |              |              |
| Drowning                            | Male   | Socio-demographic Index                             |              |              | X            |              |              | X            |
| Drowning                            | Female | Socio-demographic Index                             |              |              | X            |              |              | X            |
| Drowning                            | Male   | Education (years per capita)                        |              |              | X            |              |              | X            |
| Drowning                            | Female | Education (years per capita)                        |              |              | X            |              |              | X            |
| Drowning                            | Male   | Alcohol (liters per capita)                         | X            |              |              | X            |              |              |
| Drowning                            | Female | Alcohol (liters per capita)                         | X            |              |              | X            |              |              |
| Drowning                            | Female | Rainfall Quintile 5 (proportion)                    | X            |              |              | X            |              |              |
| Drowning                            | Male   | Rainfall Quintile 5 (proportion)                    | X            |              |              | X            |              |              |
| Drowning                            | Female | Rainfall Quintile 1 (proportion)                    | X            |              |              | X            |              |              |
| Drowning                            | Male   | Rainfall Quintile 1 (proportion)                    | X            |              |              | X            |              |              |
| Drowning                            | Female | Coastal Population within 10km (proportion)         | X            |              |              | X            |              |              |
| Drowning                            | Male   | Coastal Population within 10km (proportion)         | X            |              |              | X            |              |              |
| Drowning                            | Female | Landlocked Nation (binary)                          | X            |              |              | X            |              |              |
| Drowning                            | Female | LDI (IS per capita)                                 |              |              | X            |              |              | X            |
| Drowning                            | Male   | LDI (IS per capita)                                 |              |              | X            |              |              | X            |
| Drowning                            | Female | Elevation Under 100m (proportion)                   |              | X            |              |              | X            |              |
| Drowning                            | Male   | Elevation Under 100m (proportion)                   |              | X            |              |              | X            |              |
| Fire, heat, and hot substances      | Male   | Log-transformed SEV scalar: Fire                    | X            |              |              | X            |              |              |
| Fire, heat, and hot substances      | Female | Tobacco (cigarettes per capita)                     |              | X            |              |              | X            |              |
| Fire, heat, and hot substances      | Male   | Socio-demographic Index                             |              |              | X            |              |              | X            |
| Fire, heat, and hot substances      | Female | Alcohol (liters per capita)                         |              | X            |              |              | X            |              |
| Fire, heat, and hot substances      | Male   | Socio-demographic Index                             |              |              | X            |              |              | X            |
| Fire, heat, and hot substances      | Female | Socio-demographic Index                             |              |              | X            |              |              | X            |
| Fire, heat, and hot substances      | Female | LDI (IS per capita)                                 |              |              | X            |              |              | X            |
| Fire, heat, and hot substances      | Female | Socio-demographic Index                             |              |              | X            |              |              | X            |
| Fire, heat, and hot substances      | Male   | Healthcare access and quality index                 |              | X            |              |              | X            |              |
| Fire, heat, and hot substances      | Female | Healthcare access and quality index                 |              | X            |              |              | X            |              |
| Fire, heat, and hot substances      | Male   | Population Density (over 1000 ppl/sqkm, proportion) |              | X            |              |              | X            |              |
| Fire, heat, and hot substances      | Female | Population Density (over 1000 ppl/sqkm, proportion) |              | X            |              |              | X            |              |
| Fire, heat, and hot substances      | Male   | Alcohol (liters per capita)                         |              | X            |              |              | X            |              |
| Fire, heat, and hot substances      | Female | Education (years per capita)                        |              |              | X            |              |              | X            |
| Fire, heat, and hot substances      | Female | Population Density (over 1000 ppl/sqkm, proportion) |              | X            |              |              | X            |              |
| Fire, heat, and hot substances      | Male   | LDI (IS per capita)                                 |              |              | X            |              |              | X            |
| Fire, heat, and hot substances      | Male   | Education (years per capita)                        |              |              | X            |              |              | X            |
| Fire, heat, and hot substances      | Male   | Tobacco (cigarettes per capita)                     |              | X            |              |              | X            |              |
| Fire, heat, and hot substances      | Female | Log-transformed SEV scalar: Fire                    | X            |              |              | X            |              |              |
| Poisonings                          | Male   | Log-transformed SEV scalar: Poison                  | X            |              |              | X            |              |              |
| Poisonings                          | Male   | Socio-demographic Index                             |              |              | X            |              |              | X            |
| Poisonings                          | Male   | Socio-demographic Index                             |              |              | X            |              |              | X            |
| Poisonings                          | Female | Socio-demographic Index                             |              |              | X            |              |              | X            |
| Poisonings                          | Female | Socio-demographic Index                             |              |              | X            |              |              | X            |
| Poisonings                          | Male   | Healthcare access and quality index                 |              | X            |              |              | X            |              |
| Poisonings                          | Female | Healthcare access and quality index                 |              | X            |              |              | X            |              |
| Poisonings                          | Male   | Population Density (under 150 ppl/sqkm, proportion) |              | X            |              |              | X            |              |
| Poisonings                          | Female | Population Density (under 150 ppl/sqkm, proportion) |              | X            |              |              | X            |              |
| Poisonings                          | Male   | Population Density (over 1000 ppl/sqkm, proportion) |              | X            |              |              | X            |              |
| Poisonings                          | Female | Population Density (over 1000 ppl/sqkm, proportion) |              | X            |              |              | X            |              |
| Poisonings                          | Male   | LDI (IS per capita)                                 |              |              | X            |              |              | X            |
| Poisonings                          | Female | LDI (IS per capita)                                 |              |              | X            |              |              | X            |
| Poisonings                          | Male   | Education (years per capita)                        |              |              | X            |              |              | X            |
| Poisonings                          | Female | Education (years per capita)                        |              |              | X            |              |              | X            |
| Poisonings                          | Female | Log-transformed SEV scalar: Poison                  | X            |              |              | X            |              |              |
| Poisonings                          | Male   | Opium Cultivation (binary)                          | X            |              |              | X            |              |              |
| Poisonings                          | Female | Opium Cultivation (binary)                          | X            |              |              | X            |              |              |
| Exposure to mechanical forces       | Female | LDI (IS per capita)                                 |              |              | X            |              |              | X            |
| Exposure to mechanical forces       | Male   | Alcohol (liters per capita)                         |              | X            |              |              | X            |              |
| Exposure to mechanical forces       | Female | Alcohol (liters per capita)                         |              | X            |              |              | X            |              |
| Exposure to mechanical forces       | Male   | Socio-demographic Index                             |              |              | X            |              |              | X            |
| Exposure to mechanical forces       | Female | Healthcare access and quality index                 |              |              | X            |              | X            |              |
| Exposure to mechanical forces       | Female | Healthcare access and quality index                 |              |              | X            |              | X            |              |
| Exposure to mechanical forces       | Male   | Population Density (under 150 ppl/sqkm, proportion) |              | X            |              |              | X            |              |
| Exposure to mechanical forces       | Female | Population Density (under 150 ppl/sqkm, proportion) |              | X            |              |              | X            |              |
| Exposure to mechanical forces       | Male   | Socio-demographic Index                             |              |              | X            |              |              | X            |
| Exposure to mechanical forces       | Female | Socio-demographic Index                             |              |              | X            |              |              | X            |
| Exposure to mechanical forces       | Male   | Population Density (over 1000 ppl/sqkm, proportion) |              | X            |              |              | X            |              |
| Exposure to mechanical forces       | Female | Population Density (over 1000 ppl/sqkm, proportion) |              | X            |              |              | X            |              |
| Exposure to mechanical forces       | Male   | LDI (IS per capita)                                 |              |              | X            |              |              | X            |
| Exposure to mechanical forces       | Male   | Education (years per capita)                        |              |              | X            |              |              | X            |
| Exposure to mechanical forces       | Female | Education (years per capita)                        |              |              | X            |              |              | X            |
| Exposure to mechanical forces       | Female | Population Density (under 150 ppl/sqkm, proportion) |              | X            |              |              | X            |              |
| Unintentional firearm injuries      | Female | Healthcare access and quality index                 |              | X            |              |              | X            |              |
| Unintentional firearm injuries      | Male   | Log-transformed SEV scalar: Mech Gun                | X            |              |              | X            |              |              |
| Unintentional firearm injuries      | Female | Log-transformed SEV scalar: Mech Gun                | X            |              |              | X            |              |              |
| Unintentional firearm injuries      | Male   | Health System Access (unitless)                     |              | X            |              |              | X            |              |
| Unintentional firearm injuries      | Male   | Socio-demographic Index                             |              |              | X            |              |              | X            |
| Unintentional firearm injuries      | Female | Socio-demographic Index                             |              |              | X            |              |              | X            |
| Unintentional firearm injuries      | Male   | Healthcare access and quality index                 |              | X            |              |              | X            |              |
| Unintentional firearm injuries      | Male   | Population Density (under 150 ppl/sqkm, proportion) |              |              | X            |              |              | X            |
| Unintentional firearm injuries      | Female | Health System Access (unitless)                     |              | X            |              |              | X            |              |
| Unintentional firearm injuries      | Male   | Population Density (over 1000 ppl/sqkm, proportion) |              |              | X            |              |              | X            |
| Unintentional firearm injuries      | Female | Population Density (over 1000 ppl/sqkm, proportion) |              |              | X            |              |              | X            |
| Unintentional firearm injuries      | Male   | LDI (IS per capita)                                 |              |              | X            |              |              | X            |
| Unintentional firearm injuries      | Female | LDI (IS per capita)                                 |              |              | X            |              |              | X            |
| Unintentional firearm injuries      | Male   | Education (years per capita)                        |              |              | X            |              |              | X            |
| Unintentional firearm injuries      | Female | Education (years per capita)                        |              |              | X            |              |              | X            |
| Unintentional firearm injuries      | Female | Population Density (under 150 ppl/sqkm, proportion) |              |              | X            |              |              | X            |
| Unintentional firearm injuries      | Female | Alcohol (liters per capita)                         |              | X            |              |              | X            |              |
| Unintentional firearm injuries      | Male   | Alcohol (liters per capita)                         |              | X            |              |              | X            |              |
| Other exposure to mechanical forces | Female | Healthcare access and quality index                 |              | X            |              |              | X            |              |
| Other exposure to mechanical forces | Male   | Healthcare access and quality index                 |              | X            |              |              | X            |              |
| Other exposure to mechanical forces | Female | Socio-demographic Index                             |              |              | X            |              |              | X            |
| Other exposure to mechanical forces | Female | Health System Access (unitless)                     |              | X            |              |              | X            |              |
| Other exposure to mechanical forces | Male   | Population Density (under 150 ppl/sqkm, proportion) |              | X            |              |              | X            |              |
| Other exposure to mechanical forces | Male   | Health System Access (unitless)                     |              | X            |              |              | X            |              |
| Other exposure to mechanical forces | Female | Log-transformed SEV scalar: Oth Mech                | X            |              |              | X            |              |              |
| Other exposure to mechanical forces | Male   | Log-transformed SEV scalar: Oth Mech                | X            |              |              | X            |              |              |

Appendix Table 10: Comparison of GBD 2016 and GBD 2017 covariates and level of covariates used in cause of death modeling

| Cause                                           | Sex    | Covariate                                           | Level 1 2017 | Level 2 2017 | Level 3 2017 | Level 1 2016 | Level 2 2016 | Level 3 2016 |
|-------------------------------------------------|--------|-----------------------------------------------------|--------------|--------------|--------------|--------------|--------------|--------------|
| Other exposure to mechanical forces             | Male   | Socio-demographic Index                             |              |              | X            |              |              | X            |
| Other exposure to mechanical forces             | Female | Population Density (under 150 ppl/sqkm, proportion) |              | X            |              |              | X            |              |
| Other exposure to mechanical forces             | Female | Education (years per capita)                        |              |              | X            |              |              | X            |
| Other exposure to mechanical forces             | Female | Population Density (over 1000 ppl/sqkm, proportion) |              | X            |              |              | X            |              |
| Other exposure to mechanical forces             | Female | LDI (US per capita)                                 |              |              | X            |              |              | X            |
| Other exposure to mechanical forces             | Male   | Education (years per capita)                        |              |              | X            |              |              | X            |
| Other exposure to mechanical forces             | Male   | Alcohol (liters per capita)                         |              | X            |              |              | X            |              |
| Other exposure to mechanical forces             | Female | Alcohol (liters per capita)                         |              | X            |              |              | X            |              |
| Other exposure to mechanical forces             | Male   | Population Density (over 1000 ppl/sqkm, proportion) |              | X            |              |              | X            |              |
| Other exposure to mechanical forces             | Male   | LDI (US per capita)                                 |              |              | X            |              |              | X            |
| Adverse effects of medical treatment            | Male   | Socio-demographic Index                             |              |              | X            |              |              | X            |
| Adverse effects of medical treatment            | Female | Socio-demographic Index                             |              |              | X            |              |              | X            |
| Adverse effects of medical treatment            | Female | Healthcare access and quality index                 |              | X            |              |              | X            |              |
| Adverse effects of medical treatment            | Male   | LDI (US per capita)                                 |              |              | X            |              |              | X            |
| Adverse effects of medical treatment            | Female | LDI (US per capita)                                 |              |              | X            |              |              | X            |
| Adverse effects of medical treatment            | Male   | Healthcare access and quality index                 |              | X            |              |              | X            |              |
| Animal contact                                  | Female | Log-transformed SEV scalar: Animal                  | X            |              |              | X            |              |              |
| Animal contact                                  | Male   | Alcohol (liters per capita)                         | X            |              |              | X            |              |              |
| Animal contact                                  | Female | Education (years per capita)                        |              |              | X            |              |              | X            |
| Animal contact                                  | Male   | Education (years per capita)                        |              |              | X            |              |              | X            |
| Animal contact                                  | Female | LDI (US per capita)                                 |              |              | X            |              |              | X            |
| Animal contact                                  | Male   | LDI (US per capita)                                 |              |              | X            |              |              | X            |
| Animal contact                                  | Female | Elevation Over 1500m (proportion)                   |              |              | X            |              |              | X            |
| Animal contact                                  | Male   | Elevation Over 1500m (proportion)                   |              |              | X            |              |              | X            |
| Animal contact                                  | Female | Population Density (over 1000 ppl/sqkm, proportion) |              |              | X            |              |              | X            |
| Animal contact                                  | Male   | Population Density (over 1000 ppl/sqkm, proportion) |              |              | X            |              |              | X            |
| Animal contact                                  | Female | Population Density (under 150 ppl/sqkm, proportion) |              |              | X            |              |              | X            |
| Animal contact                                  | Male   | Population Density (under 150 ppl/sqkm, proportion) |              |              | X            |              |              | X            |
| Animal contact                                  | Female | Elevation Under 100m (proportion)                   |              |              | X            |              |              | X            |
| Animal contact                                  | Male   | Elevation Under 100m (proportion)                   |              |              | X            |              |              | X            |
| Animal contact                                  | Female | Healthcare access and quality index                 |              | X            |              |              | X            |              |
| Animal contact                                  | Male   | Healthcare access and quality index                 |              | X            |              |              | X            |              |
| Animal contact                                  | Female | Socio-demographic Index                             |              |              | X            |              |              | X            |
| Animal contact                                  | Male   | Socio-demographic Index                             |              |              | X            |              |              | X            |
| Animal contact                                  | Male   | Socio-demographic Index                             |              |              | X            |              |              | X            |
| Animal contact                                  | Male   | Population 15 to 30 (proportion)                    |              | X            |              |              | X            |              |
| Animal contact                                  | Female | Log-transformed SEV scalar: Animal                  | X            |              |              | X            |              |              |
| Animal contact                                  | Male   | Population 15 to 30 (proportion)                    |              | X            |              |              | X            |              |
| Animal contact                                  | Female | Alcohol (liters per capita)                         |              |              | X            |              |              | X            |
| Venomous animal contact                         | Female | Log-transformed SEV scalar: Venom                   | X            |              |              | X            |              |              |
| Venomous animal contact                         | Female | Alcohol (liters per capita)                         | X            |              |              | X            |              |              |
| Venomous animal contact                         | Female | Education (years per capita)                        |              |              | X            |              |              | X            |
| Venomous animal contact                         | Male   | Education (years per capita)                        |              |              | X            |              |              | X            |
| Venomous animal contact                         | Female | LDI (US per capita)                                 |              |              | X            |              |              | X            |
| Venomous animal contact                         | Male   | LDI (US per capita)                                 |              |              | X            |              |              | X            |
| Venomous animal contact                         | Female | Elevation Over 1500m (proportion)                   |              |              | X            |              |              | X            |
| Venomous animal contact                         | Male   | Elevation Over 1500m (proportion)                   |              |              | X            |              |              | X            |
| Venomous animal contact                         | Female | Population Density (over 1000 ppl/sqkm, proportion) |              |              | X            |              |              | X            |
| Venomous animal contact                         | Male   | Population Density (over 1000 ppl/sqkm, proportion) |              |              | X            |              |              | X            |
| Venomous animal contact                         | Female | Population Density (under 150 ppl/sqkm, proportion) |              |              | X            |              |              | X            |
| Venomous animal contact                         | Male   | Population Density (under 150 ppl/sqkm, proportion) |              |              | X            |              |              | X            |
| Venomous animal contact                         | Female | Elevation Under 100m (proportion)                   |              |              | X            |              |              | X            |
| Venomous animal contact                         | Male   | Elevation Under 100m (proportion)                   |              |              | X            |              |              | X            |
| Venomous animal contact                         | Female | Healthcare access and quality index                 |              | X            |              |              | X            |              |
| Venomous animal contact                         | Male   | Healthcare access and quality index                 |              | X            |              |              | X            |              |
| Venomous animal contact                         | Female | Socio-demographic Index                             |              |              | X            |              |              | X            |
| Venomous animal contact                         | Male   | Log-transformed SEV scalar: Venom                   | X            |              |              | X            |              |              |
| Venomous animal contact                         | Female | Socio-demographic Index                             |              |              | X            |              |              | X            |
| Venomous animal contact                         | Male   | Socio-demographic Index                             |              |              | X            |              |              | X            |
| Venomous animal contact                         | Male   | Socio-demographic Index                             |              |              | X            |              |              | X            |
| Venomous animal contact                         | Female | Population 15 to 30 (proportion)                    |              |              | X            |              |              | X            |
| Venomous animal contact                         | Male   | Alcohol (liters per capita)                         |              |              | X            |              |              | X            |
| Venomous animal contact                         | Female | Alcohol (liters per capita)                         |              |              | X            |              |              | X            |
| Venomous animal contact                         | Female | Elevation Over 1500m (proportion)                   |              |              | X            |              |              | X            |
| Venomous animal contact                         | Male   | Elevation Over 1500m (proportion)                   |              |              | X            |              |              | X            |
| Venomous animal contact                         | Female | Population Density (over 1000 ppl/sqkm, proportion) |              |              | X            |              |              | X            |
| Venomous animal contact                         | Male   | Population Density (over 1000 ppl/sqkm, proportion) |              |              | X            |              |              | X            |
| Venomous animal contact                         | Female | Population Density (under 150 ppl/sqkm, proportion) |              |              | X            |              |              | X            |
| Venomous animal contact                         | Male   | Population Density (under 150 ppl/sqkm, proportion) |              |              | X            |              |              | X            |
| Venomous animal contact                         | Female | Elevation Under 100m (proportion)                   |              |              | X            |              |              | X            |
| Venomous animal contact                         | Male   | Elevation Under 100m (proportion)                   |              |              | X            |              |              | X            |
| Venomous animal contact                         | Female | Healthcare access and quality index                 |              | X            |              |              | X            |              |
| Venomous animal contact                         | Male   | Healthcare access and quality index                 |              | X            |              |              | X            |              |
| Venomous animal contact                         | Female | Socio-demographic Index                             |              |              | X            |              |              | X            |
| Venomous animal contact                         | Male   | Log-transformed SEV scalar: Non Ven                 | X            |              |              | X            |              |              |
| Venomous animal contact                         | Female | Log-transformed SEV scalar: Non Ven                 | X            |              |              | X            |              |              |
| Non-venomous animal contact                     | Female | Population Density (over 1000 ppl/sqkm, proportion) |              |              | X            |              |              | X            |
| Non-venomous animal contact                     | Male   | Healthcare access and quality index                 |              | X            |              |              | X            |              |
| Non-venomous animal contact                     | Male   | Healthcare access and quality index                 |              | X            |              |              | X            |              |
| Non-venomous animal contact                     | Female | Healthcare access and quality index                 |              | X            |              |              | X            |              |
| Non-venomous animal contact                     | Male   | Elevation Under 100m (proportion)                   |              |              | X            |              |              | X            |
| Non-venomous animal contact                     | Female | Elevation Under 100m (proportion)                   |              |              | X            |              |              | X            |
| Non-venomous animal contact                     | Male   | Population Density (under 150 ppl/sqkm, proportion) |              |              | X            |              |              | X            |
| Non-venomous animal contact                     | Female | Population Density (under 150 ppl/sqkm, proportion) |              |              | X            |              |              | X            |
| Non-venomous animal contact                     | Male   | Population Density (over 1000 ppl/sqkm, proportion) |              |              | X            |              |              | X            |
| Non-venomous animal contact                     | Female | Population Density (over 1000 ppl/sqkm, proportion) |              |              | X            |              |              | X            |
| Non-venomous animal contact                     | Male   | Elevation Over 1500m (proportion)                   |              |              | X            |              |              | X            |
| Non-venomous animal contact                     | Female | Elevation Over 1500m (proportion)                   |              |              | X            |              |              | X            |
| Non-venomous animal contact                     | Male   | LDI (US per capita)                                 |              |              | X            |              |              | X            |
| Non-venomous animal contact                     | Female | LDI (US per capita)                                 |              |              | X            |              |              | X            |
| Non-venomous animal contact                     | Male   | Education (years per capita)                        |              |              | X            |              |              | X            |
| Non-venomous animal contact                     | Female | Socio-demographic Index                             |              |              | X            |              |              | X            |
| Non-venomous animal contact                     | Female | Education (years per capita)                        |              |              | X            |              |              | X            |
| Non-venomous animal contact                     | Male   | Alcohol (liters per capita)                         | X            |              |              | X            |              |              |
| Non-venomous animal contact                     | Female | Alcohol (liters per capita)                         | X            |              |              | X            |              |              |
| Non-venomous animal contact                     | Male   | Alcohol (liters per capita)                         | X            |              |              | X            |              |              |
| Non-venomous animal contact                     | Male   | Socio-demographic Index                             |              |              | X            |              |              | X            |
| Foreign body                                    | Male   | Education (years per capita)                        | X            |              |              | X            |              |              |
| Foreign body                                    | Female | LDI (US per capita)                                 | X            |              |              | X            |              |              |
| Foreign body                                    | Male   | Population Over 65 (proportion)                     | X            |              |              | X            |              |              |
| Foreign body                                    | Female | Education (years per capita)                        | X            |              |              | X            |              |              |
| Foreign body                                    | Male   | LDI (US per capita)                                 | X            |              |              | X            |              |              |
| Foreign body                                    | Female | Population Density (over 1000 ppl/sqkm, proportion) | X            |              |              | X            |              |              |
| Foreign body                                    | Male   | Population Density (over 1000 ppl/sqkm, proportion) | X            |              |              | X            |              |              |
| Foreign body                                    | Female | Healthcare access and quality index                 |              | X            |              |              | X            |              |
| Foreign body                                    | Male   | Healthcare access and quality index                 |              | X            |              |              | X            |              |
| Foreign body                                    | Female | Socio-demographic Index                             |              |              | X            |              |              | X            |
| Foreign body                                    | Male   | Socio-demographic Index                             |              |              | X            |              |              | X            |
| Foreign body                                    | Female | Population Over 65 (proportion)                     | X            |              |              | X            |              |              |
| Pulmonary aspiration and foreign body in airway | Female | Alcohol (liters per capita)                         |              | X            |              |              | X            |              |
| Pulmonary aspiration and foreign body in airway | Female | Log-transformed SEV scalar: F Body Asp              | X            |              |              | X            |              |              |
| Pulmonary aspiration and foreign body in airway | Female | Socio-demographic Index                             |              |              | X            |              |              | X            |
| Pulmonary aspiration and foreign body in airway | Male   | Mean BMI                                            |              | X            |              |              | X            |              |
| Pulmonary aspiration and foreign body in airway | Female | Mean BMI                                            |              | X            |              |              | X            |              |
| Pulmonary aspiration and foreign body in airway | Female | Healthcare access and quality index                 |              | X            |              |              | X            |              |
| Pulmonary aspiration and foreign body in airway | Male   | Healthcare access and quality index                 |              | X            |              |              | X            |              |
| Pulmonary aspiration and foreign body in airway | Male   | LDI (US per capita)                                 |              |              | X            |              |              | X            |
| Pulmonary aspiration and foreign body in airway | Female | LDI (US per capita)                                 |              |              | X            |              |              | X            |
| Pulmonary aspiration and foreign body in airway | Male   | Alcohol (liters per capita)                         |              | X            |              |              | X            |              |
| Pulmonary aspiration and foreign body in airway | Male   | Log-transformed SEV scalar: F Body Asp              | X            |              |              | X            |              |              |
| Pulmonary aspiration and foreign body in airway | Male   | Socio-demographic Index                             |              |              | X            |              |              | X            |
| Foreign body in other body part                 | Female | Socio-demographic Index                             |              |              | X            |              |              | X            |
| Foreign body in other body part                 | Female | Log-transformed SEV scalar: Oth F Body              | X            |              |              | X            |              |              |
| Foreign body in other body part                 | Male   | Log-transformed SEV scalar: Oth F Body              | X            |              |              | X            |              |              |
| Foreign body in other body part                 | Female | Alcohol (liters per capita)                         | X            |              |              | X            |              |              |
| Foreign body in other body part                 | Male   | Alcohol (liters per capita)                         | X            |              |              | X            |              |              |
| Foreign body in other body part                 | Female | Education (years per capita)                        |              |              | X            |              |              | X            |
| Foreign body in other body part                 | Male   | Education (years per capita)                        |              |              | X            |              |              | X            |
| Foreign body in other body part                 | Male   | LDI (US per capita)                                 |              |              | X            |              |              | X            |
| Foreign body in other body part                 | Female | Elevation Over 1500m (proportion)                   |              |              | X            |              |              | X            |
| Foreign body in other body part                 | Male   | Elevation Over 1500m (proportion)                   |              |              | X            |              |              | X            |
| Foreign body in other body part                 | Female | LDI (US per capita)                                 |              |              | X            |              |              | X            |
| Foreign body in other body part                 | Male   | Population Density (over 1000 ppl/sqkm, proportion) |              |              | X            |              |              | X            |



Appendix Table 10: Comparison of GBD 2016 and GBD 2017 covariates and level of covariates used in cause of death modeling

| Cause                                | Sex    | Covariate                                           | Level 1 2017 | Level 2 2017 | Level 3 2017 | Level 1 2016 | Level 2 2016 | Level 3 2016 |
|--------------------------------------|--------|-----------------------------------------------------|--------------|--------------|--------------|--------------|--------------|--------------|
| Foreign body in other body part      | Female | Population Density (under 150 ppl/sqkm, proportion) |              |              | X            |              |              | X            |
| Foreign body in other body part      | Male   | Population Density (under 150 ppl/sqkm, proportion) |              |              | X            |              |              | X            |
| Foreign body in other body part      | Male   | Socio-demographic Index                             |              |              | X            |              |              | X            |
| Foreign body in other body part      | Female | Elevation Under 100m (proportion)                   |              |              | X            |              |              | X            |
| Foreign body in other body part      | Male   | Elevation Under 100m (proportion)                   |              |              | X            |              |              | X            |
| Foreign body in other body part      | Female | Healthcare access and quality index                 |              |              | X            |              | X            |              |
| Foreign body in other body part      | Male   | Healthcare access and quality index                 |              | X            |              |              | X            |              |
| Foreign body in other body part      | Female | Population Density (over 1000 ppl/sqkm, proportion) |              |              | X            |              |              | X            |
| Other unintentional injuries         | Female | Population Density (under 150 ppl/sqkm, proportion) |              |              | X            |              |              | X            |
| Other unintentional injuries         | Male   | Population Density (over 1000 ppl/sqkm, proportion) |              |              | X            |              |              | X            |
| Other unintentional injuries         | Male   | LDI (5 per capita)                                  |              |              | X            |              |              | X            |
| Other unintentional injuries         | Male   | Elevation Over 1500m (proportion)                   |              |              | X            |              |              | X            |
| Other unintentional injuries         | Female | Elevation Over 1500m (proportion)                   |              |              | X            |              |              | X            |
| Other unintentional injuries         | Male   | Population Density (under 150 ppl/sqkm, proportion) |              |              | X            |              |              | X            |
| Other unintentional injuries         | Female | Population Density (over 1000 ppl/sqkm, proportion) |              |              | X            |              |              | X            |
| Other unintentional injuries         | Female | Elevation Under 100m (proportion)                   |              |              | X            |              |              | X            |
| Other unintentional injuries         | Male   | Vehicles - 2 wheels (per capita)                    | X            |              |              | X            |              |              |
| Other unintentional injuries         | Female | Log-transformed SEV scalar: Oth Unit                | X            |              |              | X            |              |              |
| Other unintentional injuries         | Male   | Log-transformed SEV scalar: Oth Unit                | X            |              |              | X            |              |              |
| Other unintentional injuries         | Female | Healthcare access and quality index                 |              | X            |              |              | X            |              |
| Other unintentional injuries         | Male   | Healthcare access and quality index                 |              | X            |              |              | X            |              |
| Other unintentional injuries         | Female | Socio-demographic Index                             |              |              | X            |              |              | X            |
| Other unintentional injuries         | Male   | Socio-demographic Index                             |              |              | X            |              |              | X            |
| Other unintentional injuries         | Female | Vehicles - 2 wheels (per capita)                    | X            |              |              | X            |              |              |
| Other unintentional injuries         | Female | LDI (5 per capita)                                  |              |              | X            |              |              | X            |
| Other unintentional injuries         | Male   | Elevation Under 100m (proportion)                   |              |              | X            |              |              | X            |
| Other unintentional injuries         | Male   | Education (years per capita)                        |              |              | X            |              |              | X            |
| Other unintentional injuries         | Female | Vehicles - 4 wheels (per capita)                    | X            |              |              | X            |              |              |
| Other unintentional injuries         | Male   | Alcohol (liters per capita)                         | X            |              |              | X            |              |              |
| Other unintentional injuries         | Female | Alcohol (liters per capita)                         | X            |              |              | X            |              |              |
| Other unintentional injuries         | Male   | Vehicles - 4 wheels (per capita)                    | X            |              |              | X            |              |              |
| Other unintentional injuries         | Female | Education (years per capita)                        |              |              | X            |              |              | X            |
| Self-harm and interpersonal violence | Male   | Healthcare access and quality index                 | X            |              |              | X            |              | X            |
| Self-harm and interpersonal violence | Female | Healthcare access and quality index                 | X            |              |              | X            |              | X            |
| Self-harm and interpersonal violence | Male   | Log-transformed SEV scalar: Oth Unit                | X            |              |              | X            |              | X            |
| Self-harm and interpersonal violence | Female | Log-transformed SEV scalar: Oth Unit                | X            |              |              | X            |              | X            |
| Self-harm and interpersonal violence | Male   | Elevation Under 100m (proportion)                   |              |              | X            |              |              | X            |
| Self-harm and interpersonal violence | Female | Elevation Under 100m (proportion)                   |              |              | X            |              |              | X            |
| Self-harm and interpersonal violence | Male   | Population Density (under 150 ppl/sqkm, proportion) |              |              | X            |              |              | X            |
| Self-harm and interpersonal violence | Female | Population Density (under 150 ppl/sqkm, proportion) |              |              | X            |              |              | X            |
| Self-harm and interpersonal violence | Female | Population Density (over 1000 ppl/sqkm, proportion) |              |              | X            |              |              | X            |
| Self-harm and interpersonal violence | Female | Elevation Over 1500m (proportion)                   |              |              | X            |              |              | X            |
| Self-harm and interpersonal violence | Male   | LDI (5 per capita)                                  |              |              | X            |              |              | X            |
| Self-harm and interpersonal violence | Female | LDI (5 per capita)                                  |              |              | X            |              |              | X            |
| Self-harm and interpersonal violence | Male   | Education (years per capita)                        |              |              | X            |              |              | X            |
| Self-harm and interpersonal violence | Female | Education (years per capita)                        |              |              | X            |              |              | X            |
| Self-harm and interpersonal violence | Male   | Alcohol (liters per capita)                         | X            |              |              | X            |              |              |
| Self-harm and interpersonal violence | Male   | Population Density (over 1000 ppl/sqkm, proportion) |              |              | X            |              |              | X            |
| Self-harm and interpersonal violence | Male   | Elevation Over 1500m (proportion)                   |              |              | X            |              |              | X            |
| Self-harm and interpersonal violence | Female | Alcohol (liters per capita)                         | X            |              |              | X            |              |              |
| Self-harm                            | Male   | Alcohol (liters per capita)                         | X            |              |              | X            |              |              |
| Self-harm                            | Female | Alcohol (liters per capita)                         | X            |              |              | X            |              |              |
| Self-harm                            | Female | Major depressive disorder                           | X            |              |              | X            |              |              |
| Self-harm                            | Female | Log-transformed SEV scalar: Self Harm               | X            |              |              | X            |              |              |
| Self-harm                            | Male   | Religion (binary, >50% Muslim)                      |              | X            |              |              | X            |              |
| Self-harm                            | Female | Religion (binary, >50% Muslim)                      |              | X            |              |              | X            |              |
| Self-harm                            | Male   | Population Density (500-1000 ppl/sqkm, proportion)  |              |              | X            |              |              | X            |
| Self-harm                            | Male   | Population Density (300-500 ppl/sqkm, proportion)   |              |              | X            |              |              | X            |
| Self-harm                            | Female | Population Density (300-500 ppl/sqkm, proportion)   |              |              | X            |              |              | X            |
| Self-harm                            | Female | Population Density (150-300 ppl/sqkm, proportion)   |              |              | X            |              |              | X            |
| Self-harm                            | Male   | Socio-demographic Index                             |              |              | X            |              |              | X            |
| Self-harm                            | Male   | Socio-demographic Index                             |              |              | X            |              |              | X            |
| Self-harm                            | Female | Population Density (500-1000 ppl/sqkm, proportion)  |              | X            |              |              | X            |              |
| Self-harm                            | Female | Socio-demographic Index                             |              |              | X            |              |              | X            |
| Self-harm                            | Female | Education (years per capita)                        |              |              | X            |              |              | X            |
| Self-harm                            | Female | Socio-demographic Index                             |              |              | X            |              |              | X            |
| Self-harm                            | Male   | Education (years per capita)                        |              |              | X            |              |              | X            |
| Self-harm                            | Female | LDI (5 per capita)                                  |              |              | X            |              |              | X            |
| Self-harm                            | Female | Population Density (over 1000 ppl/sqkm, proportion) |              | X            |              |              | X            |              |
| Self-harm                            | Male   | LDI (5 per capita)                                  |              |              | X            |              |              | X            |
| Self-harm                            | Female | Population Density (under 150 ppl/sqkm, proportion) |              |              | X            |              |              | X            |
| Self-harm                            | Male   | Population Density (under 150 ppl/sqkm, proportion) |              |              | X            |              |              | X            |
| Self-harm                            | Female | Healthcare access and quality index                 |              |              | X            |              |              | X            |
| Self-harm                            | Male   | Healthcare access and quality index                 |              |              | X            |              |              | X            |
| Self-harm                            | Male   | Population Density (over 1000 ppl/sqkm, proportion) |              |              | X            |              |              | X            |
| Self-harm by firearm                 | Male   | Population Density (150-300 ppl/sqkm, proportion)   |              |              | X            |              |              | X            |
| Self-harm by firearm                 | Female | Population Density (500-1000 ppl/sqkm, proportion)  |              |              | X            |              |              | X            |
| Self-harm by firearm                 | Female | Population Density (300-500 ppl/sqkm, proportion)   |              |              | X            |              |              | X            |
| Self-harm by firearm                 | Male   | Population Density (300-500 ppl/sqkm, proportion)   |              |              | X            |              |              | X            |
| Self-harm by firearm                 | Male   | Population Density (500-1000 ppl/sqkm, proportion)  |              |              | X            |              |              | X            |
| Self-harm by firearm                 | Female | Major depressive disorder                           | X            |              |              | X            |              |              |
| Self-harm by firearm                 | Male   | Religion (binary, >50% Muslim)                      |              | X            |              |              | X            |              |
| Self-harm by firearm                 | Female | Log-transformed SEV scalar: Self Harm               | X            |              |              | X            |              |              |
| Self-harm by firearm                 | Male   | Log-transformed SEV scalar: Self Harm               | X            |              |              | X            |              |              |
| Self-harm by firearm                 | Male   | Major depressive disorder                           | X            |              |              | X            |              |              |
| Self-harm by firearm                 | Female | Population Density (150-300 ppl/sqkm, proportion)   |              |              | X            |              |              | X            |
| Self-harm by firearm                 | Female | Religion (binary, >50% Muslim)                      |              |              | X            |              |              | X            |
| Self-harm by firearm                 | Male   | Socio-demographic Index                             |              |              | X            |              |              | X            |
| Self-harm by firearm                 | Female | Population Density (over 1000 ppl/sqkm, proportion) |              | X            |              |              | X            |              |
| Self-harm by firearm                 | Male   | Healthcare access and quality index                 |              | X            |              |              | X            |              |
| Self-harm by firearm                 | Female | Socio-demographic Index                             |              |              | X            |              |              | X            |
| Self-harm by firearm                 | Male   | Alcohol (liters per capita)                         | X            |              |              | X            |              |              |
| Self-harm by firearm                 | Female | Education (years per capita)                        |              |              | X            |              |              | X            |
| Self-harm by firearm                 | Male   | Education (years per capita)                        |              |              | X            |              |              | X            |
| Self-harm by firearm                 | Female | LDI (5 per capita)                                  |              |              | X            |              |              | X            |
| Self-harm by firearm                 | Female | Alcohol (liters per capita)                         | X            |              |              | X            |              |              |
| Self-harm by firearm                 | Male   | Population Density (over 1000 ppl/sqkm, proportion) |              | X            |              |              | X            |              |
| Self-harm by firearm                 | Female | Population Density (under 150 ppl/sqkm, proportion) |              |              | X            |              |              | X            |
| Self-harm by firearm                 | Male   | Population Density (under 150 ppl/sqkm, proportion) |              |              | X            |              |              | X            |
| Self-harm by firearm                 | Female | Healthcare access and quality index                 |              |              | X            |              |              | X            |
| Self-harm by firearm                 | Male   | LDI (5 per capita)                                  |              |              | X            |              |              | X            |
| Self-harm by other specified means   | Female | Population Density (150-300 ppl/sqkm, proportion)   |              |              | X            |              |              | X            |
| Self-harm by other specified means   | Male   | Population Density (150-300 ppl/sqkm, proportion)   |              |              | X            |              |              | X            |
| Self-harm by other specified means   | Female | Population Density (300-500 ppl/sqkm, proportion)   |              |              | X            |              |              | X            |
| Self-harm by other specified means   | Male   | Population Density (300-500 ppl/sqkm, proportion)   |              |              | X            |              |              | X            |
| Self-harm by other specified means   | Female | Population Density (500-1000 ppl/sqkm, proportion)  |              |              | X            |              |              | X            |
| Self-harm by other specified means   | Male   | Religion (binary, >50% Muslim)                      |              | X            |              |              | X            |              |
| Self-harm by other specified means   | Female | Religion (binary, >50% Muslim)                      |              | X            |              |              | X            |              |
| Self-harm by other specified means   | Male   | Log-transformed SEV scalar: Self Harm               | X            |              |              | X            |              |              |
| Self-harm by other specified means   | Female | Major depressive disorder                           | X            |              |              | X            |              |              |
| Self-harm by other specified means   | Male   | Major depressive disorder                           | X            |              |              | X            |              |              |

Appendix Table 10: Comparison of GBD 2016 and GBD 2017 covariates and level of covariates used in cause of death modeling

| Cause                                | Sex    | Covariate                                                      | Level 1 2017 | Level 2 2017 | Level 3 2017 | Level 1 2016 | Level 2 2016 | Level 3 2016 |
|--------------------------------------|--------|----------------------------------------------------------------|--------------|--------------|--------------|--------------|--------------|--------------|
| Self-harm by other specified means   | Male   | Population Density (500-1000 ppl/sqkm, proportion)             |              | X            |              |              | X            |              |
| Self-harm by other specified means   | Male   | Socio-demographic Index                                        |              |              | X            |              |              | X            |
| Self-harm by other specified means   | Female | Log-transformed SEV scalar: Self Harm                          | X            |              |              | X            |              |              |
| Self-harm by other specified means   | Male   | Healthcare access and quality index                            |              | X            |              |              | X            |              |
| Self-harm by other specified means   | Male   | LDI (5 per capita)                                             |              |              | X            |              |              | X            |
| Self-harm by other specified means   | Female | LDI (5 per capita)                                             |              |              | X            |              |              | X            |
| Self-harm by other specified means   | Female | Education (years per capita)                                   |              |              | X            |              |              | X            |
| Self-harm by other specified means   | Male   | Alcohol (liters per capita)                                    | X            |              |              | X            |              |              |
| Self-harm by other specified means   | Female | Alcohol (liters per capita)                                    | X            |              |              | X            |              |              |
| Self-harm by other specified means   | Male   | Education (years per capita)                                   |              |              | X            |              |              | X            |
| Self-harm by other specified means   | Female | Population Density (over 1000 ppl/sqkm, proportion)            |              | X            |              |              | X            |              |
| Self-harm by other specified means   | Male   | Population Density (over 1000 ppl/sqkm, proportion)            |              | X            |              |              | X            |              |
| Self-harm by other specified means   | Female | Population Density (under 150 ppl/sqkm, proportion)            |              | X            |              |              | X            |              |
| Self-harm by other specified means   | Male   | Population Density (under 150 ppl/sqkm, proportion)            |              | X            |              |              | X            |              |
| Self-harm by other specified means   | Female | Healthcare access and quality index                            |              | X            |              |              | X            |              |
| Self-harm by other specified means   | Female | Socio-demographic Index                                        |              |              | X            |              |              | X            |
| Interpersonal violence               | Male   | Healthcare access and quality index                            |              | X            |              |              | X            |              |
| Interpersonal violence               | Male   | Log-transformed SEV scalar: Violence                           | X            |              |              | X            |              |              |
| Interpersonal violence               | Female | Log-transformed SEV scalar: Violence                           | X            |              |              | X            |              |              |
| Interpersonal violence               | Male   | Opium Cultivation (binary)                                     |              | X            |              |              | X            |              |
| Interpersonal violence               | Female | Opium Cultivation (binary)                                     |              | X            |              |              | X            |              |
| Interpersonal violence               | Male   | Socio-demographic Index                                        |              |              | X            |              |              | X            |
| Interpersonal violence               | Female | Socio-demographic Index                                        |              |              | X            |              |              | X            |
| Interpersonal violence               | Female | Healthcare access and quality index                            |              | X            |              |              | X            |              |
| Interpersonal violence               | Male   | Population Density (over 1000 ppl/sqkm, proportion)            |              | X            |              |              | X            |              |
| Interpersonal violence               | Female | Population Density (over 1000 ppl/sqkm, proportion)            |              | X            |              |              | X            |              |
| Interpersonal violence               | Male   | LDI (5 per capita)                                             |              |              | X            |              |              | X            |
| Interpersonal violence               | Female | LDI (5 per capita)                                             |              |              | X            |              |              | X            |
| Interpersonal violence               | Male   | Education (years per capita)                                   |              |              | X            |              |              | X            |
| Interpersonal violence               | Female | Education (years per capita)                                   |              |              | X            |              |              | X            |
| Interpersonal violence               | Male   | Alcohol (liters per capita)                                    | X            |              |              | X            |              |              |
| Interpersonal violence               | Female | Alcohol (liters per capita)                                    | X            |              |              | X            |              |              |
| Assault by firearm                   | Female | Socio-demographic Index                                        |              |              | X            |              |              | X            |
| Assault by firearm                   | Male   | Healthcare access and quality index                            |              | X            |              |              | X            |              |
| Assault by firearm                   | Female | Healthcare access and quality index                            |              | X            |              |              | X            |              |
| Assault by firearm                   | Female | Population Density (over 1000 ppl/sqkm, proportion)            |              | X            |              |              | X            |              |
| Assault by firearm                   | Male   | LDI (5 per capita)                                             |              |              | X            |              |              | X            |
| Assault by firearm                   | Female | Education (years per capita)                                   |              |              | X            |              |              | X            |
| Assault by firearm                   | Male   | Education (years per capita)                                   |              |              | X            |              |              | X            |
| Assault by firearm                   | Male   | Socio-demographic Index                                        |              |              | X            |              |              | X            |
| Assault by firearm                   | Male   | Alcohol (liters per capita)                                    | X            |              |              | X            |              |              |
| Assault by firearm                   | Female | LDI (5 per capita)                                             | X            |              |              | X            |              |              |
| Assault by firearm                   | Female | Opium Cultivation (binary)                                     |              | X            |              |              | X            |              |
| Assault by firearm                   | Male   | Population Density (over 1000 ppl/sqkm, proportion)            |              | X            |              |              | X            |              |
| Assault by firearm                   | Female | Log-transformed SEV scalar: Viol Gun                           | X            |              |              | X            |              |              |
| Assault by firearm                   | Male   | Log-transformed SEV scalar: Viol Gun                           | X            |              |              | X            |              |              |
| Assault by firearm                   | Male   | Opium Cultivation (binary)                                     |              | X            |              |              | X            |              |
| Assault by sharp object              | Male   | Log-transformed SEV scalar: Viol Knife                         | X            |              |              | X            |              |              |
| Assault by sharp object              | Female | Log-transformed SEV scalar: Viol Knife                         | X            |              |              | X            |              |              |
| Assault by sharp object              | Male   | Opium Cultivation (binary)                                     |              | X            |              |              | X            |              |
| Assault by sharp object              | Female | Opium Cultivation (binary)                                     |              | X            |              |              | X            |              |
| Assault by sharp object              | Male   | Socio-demographic Index                                        |              |              | X            |              |              | X            |
| Assault by sharp object              | Male   | Healthcare access and quality index                            |              | X            |              |              | X            |              |
| Assault by sharp object              | Female | Healthcare access and quality index                            |              | X            |              |              | X            |              |
| Assault by sharp object              | Female | Socio-demographic Index                                        |              |              | X            |              |              | X            |
| Assault by sharp object              | Female | Population Density (over 1000 ppl/sqkm, proportion)            |              | X            |              |              | X            |              |
| Assault by sharp object              | Male   | LDI (5 per capita)                                             |              |              | X            |              |              | X            |
| Assault by sharp object              | Female | LDI (5 per capita)                                             |              |              | X            |              |              | X            |
| Assault by sharp object              | Male   | Education (years per capita)                                   |              |              | X            |              |              | X            |
| Assault by sharp object              | Female | Education (years per capita)                                   |              |              | X            |              |              | X            |
| Assault by sharp object              | Male   | Alcohol (liters per capita)                                    | X            |              |              | X            |              |              |
| Assault by sharp object              | Female | Alcohol (liters per capita)                                    | X            |              |              | X            |              |              |
| Assault by sharp object              | Male   | Population Density (over 1000 ppl/sqkm, proportion)            |              | X            |              |              | X            |              |
| Assault by other means               | Male   | Log-transformed SEV scalar: Oth Viol                           | X            |              |              | X            |              |              |
| Assault by other means               | Female | Log-transformed SEV scalar: Oth Viol                           | X            |              |              | X            |              |              |
| Assault by other means               | Male   | Opium Cultivation (binary)                                     |              | X            |              |              | X            |              |
| Assault by other means               | Female | Opium Cultivation (binary)                                     |              | X            |              |              | X            |              |
| Assault by other means               | Male   | Socio-demographic Index                                        |              |              | X            |              |              | X            |
| Assault by other means               | Female | Socio-demographic Index                                        |              |              | X            |              |              | X            |
| Assault by other means               | Male   | Healthcare access and quality index                            |              | X            |              |              | X            |              |
| Assault by other means               | Female | Healthcare access and quality index                            |              | X            |              |              | X            |              |
| Assault by other means               | Female | Population Density (over 1000 ppl/sqkm, proportion)            |              | X            |              |              | X            |              |
| Assault by other means               | Male   | LDI (5 per capita)                                             |              |              | X            |              |              | X            |
| Assault by other means               | Female | LDI (5 per capita)                                             |              |              | X            |              |              | X            |
| Assault by other means               | Male   | Education (years per capita)                                   |              |              | X            |              |              | X            |
| Assault by other means               | Female | Education (years per capita)                                   |              |              | X            |              |              | X            |
| Assault by other means               | Male   | Alcohol (liters per capita)                                    | X            |              |              | X            |              |              |
| Assault by other means               | Female | Alcohol (liters per capita)                                    | X            |              |              | X            |              |              |
| Assault by other means               | Male   | Population Density (over 1000 ppl/sqkm, proportion)            |              | X            |              |              | X            |              |
| Environmental heat and cold exposure | Male   | Population Density (150-300 ppl/sqkm, proportion)              |              |              | X            |              |              | X            |
| Environmental heat and cold exposure | Female | Population Density (150-300 ppl/sqkm, proportion)              |              |              | X            |              |              | X            |
| Environmental heat and cold exposure | Male   | Elevation 500 to 1500m (proportion)                            |              |              | X            |              |              | X            |
| Environmental heat and cold exposure | Female | Elevation 500 to 1500m (proportion)                            |              |              | X            |              |              | X            |
| Environmental heat and cold exposure | Male   | Population-weighted mean temperature                           |              |              | X            |              |              | X            |
| Environmental heat and cold exposure | Female | Population-weighted mean temperature                           |              |              | X            |              |              | X            |
| Environmental heat and cold exposure | Male   | Sanitation (proportion with access)                            |              |              | X            |              |              | X            |
| Environmental heat and cold exposure | Male   | Healthcare access and quality index                            |              | X            |              |              | X            |              |
| Environmental heat and cold exposure | Female | Socio-demographic Index                                        |              |              | X            |              |              | X            |
| Environmental heat and cold exposure | Female | Rainfall (Quintile 4-5)                                        |              |              | X            |              |              | X            |
| Environmental heat and cold exposure | Female | Healthcare access and quality index                            |              | X            |              |              | X            |              |
| Environmental heat and cold exposure | Male   | Elevation Over 1500m (proportion)                              |              |              | X            |              |              | X            |
| Environmental heat and cold exposure | Female | Elevation Over 1500m (proportion)                              |              |              | X            |              |              | X            |
| Environmental heat and cold exposure | Male   | LDI (5 per capita)                                             |              |              | X            |              |              | X            |
| Environmental heat and cold exposure | Female | LDI (5 per capita)                                             |              |              | X            |              |              | X            |
| Environmental heat and cold exposure | Female | Sanitation (proportion with access)                            |              |              | X            |              |              | X            |
| Environmental heat and cold exposure | Male   | Rainfall (Quintile 4-5)                                        |              |              | X            |              |              | X            |
| Environmental heat and cold exposure | Female | Socio-demographic Index                                        |              |              | X            |              |              | X            |
| Environmental heat and cold exposure | Male   | 90th percentile climatic temperature in the given country-year |              |              | X            |              |              | X            |
| Environmental heat and cold exposure | Female | 90th percentile climatic temperature in the given country-year |              |              | X            |              |              | X            |
| Environmental heat and cold exposure | Male   | Education (years per capita)                                   |              |              | X            |              |              | X            |
| Environmental heat and cold exposure | Female | Education (years per capita)                                   |              |              | X            |              |              | X            |
| Acute lymphoid leukaemia             | Female | Socio-demographic Index                                        |              |              | X            |              |              | X            |
| Acute lymphoid leukaemia             | Male   | Smoking Prevalence                                             |              | X            |              |              | X            |              |
| Acute lymphoid leukaemia             | Female | Smoking Prevalence                                             |              | X            |              |              | X            |              |
| Acute lymphoid leukaemia             | Male   | Socio-demographic Index                                        |              |              | X            |              |              | X            |
| Acute lymphoid leukaemia             | Female | Cumulative Cigarettes (5 Years)                                |              | X            |              |              | X            |              |
| Acute lymphoid leukaemia             | Male   | LDI (5 per capita)                                             |              |              | X            |              |              | X            |
| Acute lymphoid leukaemia             | Female | LDI (5 per capita)                                             |              |              | X            |              |              | X            |
| Acute lymphoid leukaemia             | Male   | Education (years per capita)                                   |              |              | X            |              |              | X            |
| Acute lymphoid leukaemia             | Female | Education (years per capita)                                   |              |              | X            |              |              | X            |
| Acute lymphoid leukaemia             | Male   | Alcohol (liters per capita)                                    |              | X            |              |              | X            |              |
| Acute lymphoid leukaemia             | Female | Alcohol (liters per capita)                                    |              | X            |              |              | X            |              |
| Acute lymphoid leukaemia             | Male   | Cumulative Cigarettes (5 Years)                                |              | X            |              |              | X            |              |
| Acute lymphoid leukaemia             | Female | Tobacco (cigarettes per capita)                                |              | X            |              |              | X            |              |
| Acute lymphoid leukaemia             | Male   | Tobacco (cigarettes per capita)                                |              | X            |              |              | X            |              |
| Acute lymphoid leukaemia             | Female | Cumulative Cigarettes (15 Years)                               |              | X            |              |              | X            |              |
| Acute lymphoid leukaemia             | Male   | Cumulative Cigarettes (15 Years)                               |              | X            |              |              | X            |              |
| Acute lymphoid leukaemia             | Female | Cumulative Cigarettes (20 Years)                               |              | X            |              |              | X            |              |
| Acute lymphoid leukaemia             | Male   | Cumulative Cigarettes (20 Years)                               |              | X            |              |              | X            |              |

Appendix Table 10: Comparison of GBD 2016 and GBD 2017 covariates and level of covariates used in cause of death modeling

| Cause                                              | Sex    | Covariate                                             | Level 1 2017 | Level 2 2017 | Level 3 2017 | Level 1 2016 | Level 2 2016 | Level 3 2016 |
|----------------------------------------------------|--------|-------------------------------------------------------|--------------|--------------|--------------|--------------|--------------|--------------|
| Acute lymphoid leukaemia                           | Female | Log-transformed SEV scalar: Leukemia                  | X            |              |              | X            |              |              |
| Acute lymphoid leukaemia                           | Male   | Log-transformed SEV scalar: Leukemia                  | X            |              |              | X            |              |              |
| Acute lymphoid leukaemia                           | Female | Log-transformed age-standardized SEV scalar: Leukemia | X            |              |              | X            |              |              |
| Acute lymphoid leukaemia                           | Male   | Log-transformed age-standardized SEV scalar: Leukemia | X            |              |              | X            |              |              |
| Acute lymphoid leukaemia                           | Female | Cumulative Cigarettes (10 Years)                      |              | X            |              |              | X            |              |
| Acute lymphoid leukaemia                           | Male   | Cumulative Cigarettes (10 Years)                      |              | X            |              |              | X            |              |
| Chronic lymphoid leukaemia                         | Female | Smoking Prevalence                                    |              | X            |              |              | X            |              |
| Chronic lymphoid leukaemia                         | Female | Socio-demographic Index                               |              |              | X            |              |              | X            |
| Chronic lymphoid leukaemia                         | Male   | Cumulative Cigarettes (20 Years)                      |              | X            |              |              | X            |              |
| Chronic lymphoid leukaemia                         | Female | Smoking Prevalence                                    |              | X            |              |              | X            |              |
| Chronic lymphoid leukaemia                         | Male   | Cumulative Cigarettes (10 Years)                      |              | X            |              |              | X            |              |
| Chronic lymphoid leukaemia                         | Female | Cumulative Cigarettes (10 Years)                      |              | X            |              |              | X            |              |
| Chronic lymphoid leukaemia                         | Male   | Cumulative Cigarettes (5 Years)                       |              | X            |              |              | X            |              |
| Chronic lymphoid leukaemia                         | Female | Cumulative Cigarettes (5 Years)                       |              | X            |              |              | X            |              |
| Chronic lymphoid leukaemia                         | Male   | Tobacco (cigarettes per capita)                       |              | X            |              |              | X            |              |
| Chronic lymphoid leukaemia                         | Female | Tobacco (cigarettes per capita)                       |              | X            |              |              | X            |              |
| Chronic lymphoid leukaemia                         | Female | Cumulative Cigarettes (15 Years)                      |              | X            |              |              | X            |              |
| Chronic lymphoid leukaemia                         | Female | Cumulative Cigarettes (20 Years)                      |              | X            |              |              | X            |              |
| Chronic lymphoid leukaemia                         | Male   | Log-transformed SEV scalar: Leukemia                  | X            |              |              | X            |              |              |
| Chronic lymphoid leukaemia                         | Female | Log-transformed SEV scalar: Leukemia                  | X            |              |              | X            |              |              |
| Chronic lymphoid leukaemia                         | Male   | Log-transformed age-standardized SEV scalar: Leukemia | X            |              |              | X            |              |              |
| Chronic lymphoid leukaemia                         | Female | Log-transformed age-standardized SEV scalar: Leukemia | X            |              |              | X            |              |              |
| Chronic lymphoid leukaemia                         | Male   | Socio-demographic Index                               |              |              | X            |              |              | X            |
| Chronic lymphoid leukaemia                         | Female | LDI (US per capita)                                   |              |              | X            |              |              | X            |
| Chronic lymphoid leukaemia                         | Male   | Cumulative Cigarettes (15 Years)                      |              | X            |              |              | X            |              |
| Chronic lymphoid leukaemia                         | Female | Education (years per capita)                          |              | X            |              |              |              | X            |
| Chronic lymphoid leukaemia                         | Male   | Education (years per capita)                          |              | X            |              |              |              | X            |
| Chronic lymphoid leukaemia                         | Female | Alcohol (liters per capita)                           |              | X            |              |              | X            |              |
| Chronic lymphoid leukaemia                         | Male   | Alcohol (liters per capita)                           |              | X            |              |              | X            |              |
| Chronic lymphoid leukaemia                         | Male   | LDI (US per capita)                                   |              |              | X            |              |              | X            |
| Acute myeloid leukaemia                            | Female | Socio-demographic Index                               |              |              | X            |              |              | X            |
| Acute myeloid leukaemia                            | Male   | Socio-demographic Index                               |              |              | X            |              |              | X            |
| Acute myeloid leukaemia                            | Female | Smoking Prevalence                                    |              | X            |              |              | X            |              |
| Acute myeloid leukaemia                            | Male   | Smoking Prevalence                                    |              | X            |              |              | X            |              |
| Acute myeloid leukaemia                            | Female | Cumulative Cigarettes (10 Years)                      |              | X            |              |              | X            |              |
| Acute myeloid leukaemia                            | Male   | Cumulative Cigarettes (10 Years)                      |              | X            |              |              | X            |              |
| Acute myeloid leukaemia                            | Female | Cumulative Cigarettes (5 Years)                       |              | X            |              |              | X            |              |
| Acute myeloid leukaemia                            | Male   | Cumulative Cigarettes (5 Years)                       |              | X            |              |              | X            |              |
| Acute myeloid leukaemia                            | Female | Cumulative Cigarettes (15 Years)                      |              | X            |              |              | X            |              |
| Acute myeloid leukaemia                            | Male   | Healthcare access and quality index                   |              | X            |              |              | X            |              |
| Acute myeloid leukaemia                            | Male   | Cumulative Cigarettes (15 Years)                      |              | X            |              |              | X            |              |
| Acute myeloid leukaemia                            | Female | Cumulative Cigarettes (20 Years)                      |              | X            |              |              | X            |              |
| Acute myeloid leukaemia                            | Male   | Cumulative Cigarettes (20 Years)                      |              | X            |              |              | X            |              |
| Acute myeloid leukaemia                            | Female | Log-transformed SEV scalar: Leukemia                  | X            |              |              | X            |              |              |
| Acute myeloid leukaemia                            | Male   | Log-transformed SEV scalar: Leukemia                  | X            |              |              | X            |              |              |
| Acute myeloid leukaemia                            | Female | Log-transformed age-standardized SEV scalar: Leukemia | X            |              |              | X            |              |              |
| Acute myeloid leukaemia                            | Male   | Log-transformed age-standardized SEV scalar: Leukemia | X            |              |              | X            |              |              |
| Acute myeloid leukaemia                            | Male   | Tobacco (cigarettes per capita)                       |              | X            |              |              | X            |              |
| Acute myeloid leukaemia                            | Male   | LDI (US per capita)                                   |              |              | X            |              |              | X            |
| Acute myeloid leukaemia                            | Female | Tobacco (cigarettes per capita)                       |              | X            |              |              | X            |              |
| Acute myeloid leukaemia                            | Male   | Education (years per capita)                          |              | X            |              |              |              | X            |
| Acute myeloid leukaemia                            | Female | Education (years per capita)                          |              | X            |              |              |              | X            |
| Acute myeloid leukaemia                            | Male   | Alcohol (liters per capita)                           |              | X            |              |              | X            |              |
| Acute myeloid leukaemia                            | Female | Alcohol (liters per capita)                           |              | X            |              |              | X            |              |
| Acute myeloid leukaemia                            | Female | LDI (US per capita)                                   |              |              | X            |              |              | X            |
| Chronic myeloid leukaemia                          | Female | Healthcare access and quality index                   |              | X            |              |              | X            |              |
| Chronic myeloid leukaemia                          | Male   | Healthcare access and quality index                   |              | X            |              |              | X            |              |
| Chronic myeloid leukaemia                          | Female | Socio-demographic Index                               |              |              | X            |              |              | X            |
| Chronic myeloid leukaemia                          | Male   | Socio-demographic Index                               |              |              | X            |              |              | X            |
| Chronic myeloid leukaemia                          | Female | Smoking Prevalence                                    |              | X            |              |              | X            |              |
| Chronic myeloid leukaemia                          | Male   | Smoking Prevalence                                    |              | X            |              |              | X            |              |
| Chronic myeloid leukaemia                          | Female | Cumulative Cigarettes (10 Years)                      |              | X            |              |              | X            |              |
| Chronic myeloid leukaemia                          | Male   | Cumulative Cigarettes (10 Years)                      |              | X            |              |              | X            |              |
| Chronic myeloid leukaemia                          | Female | Tobacco (cigarettes per capita)                       |              | X            |              |              | X            |              |
| Chronic myeloid leukaemia                          | Male   | Cumulative Cigarettes (5 Years)                       |              | X            |              |              | X            |              |
| Chronic myeloid leukaemia                          | Male   | Tobacco (cigarettes per capita)                       |              | X            |              |              | X            |              |
| Chronic myeloid leukaemia                          | Female | Cumulative Cigarettes (15 Years)                      |              | X            |              |              | X            |              |
| Chronic myeloid leukaemia                          | Male   | Cumulative Cigarettes (15 Years)                      |              | X            |              |              | X            |              |
| Chronic myeloid leukaemia                          | Female | Cumulative Cigarettes (20 Years)                      |              | X            |              |              | X            |              |
| Chronic myeloid leukaemia                          | Male   | Cumulative Cigarettes (20 Years)                      |              | X            |              |              | X            |              |
| Chronic myeloid leukaemia                          | Female | Log-transformed age-standardized SEV scalar: Leukemia | X            |              |              | X            |              |              |
| Chronic myeloid leukaemia                          | Male   | Log-transformed age-standardized SEV scalar: Leukemia | X            |              |              | X            |              |              |
| Chronic myeloid leukaemia                          | Female | Cumulative Cigarettes (5 Years)                       |              | X            |              |              | X            |              |
| Chronic myeloid leukaemia                          | Male   | LDI (US per capita)                                   |              |              | X            |              |              | X            |
| Chronic myeloid leukaemia                          | Female | Education (years per capita)                          |              | X            |              |              |              | X            |
| Chronic myeloid leukaemia                          | Male   | Education (years per capita)                          |              | X            |              |              |              | X            |
| Chronic myeloid leukaemia                          | Female | Alcohol (liters per capita)                           |              | X            |              |              | X            |              |
| Chronic myeloid leukaemia                          | Male   | Alcohol (liters per capita)                           |              | X            |              |              | X            |              |
| Chronic myeloid leukaemia                          | Female | LDI (US per capita)                                   |              |              | X            |              |              | X            |
| Non-melanoma skin cancer (squamous-cell carcinoma) | Male   | Healthcare access and quality index                   |              | X            |              |              | X            |              |
| Non-melanoma skin cancer (squamous-cell carcinoma) | Female | Healthcare access and quality index                   |              | X            |              |              | X            |              |
| Non-melanoma skin cancer (squamous-cell carcinoma) | Male   | Socio-demographic Index                               |              |              | X            |              |              | X            |
| Non-melanoma skin cancer (squamous-cell carcinoma) | Female | Socio-demographic Index                               |              |              | X            |              |              | X            |
| Non-melanoma skin cancer (squamous-cell carcinoma) | Male   | Smoking Prevalence                                    |              | X            |              |              | X            |              |
| Non-melanoma skin cancer (squamous-cell carcinoma) | Female | Smoking Prevalence                                    |              | X            |              |              | X            |              |
| Non-melanoma skin cancer (squamous-cell carcinoma) | Male   | Cumulative Cigarettes (10 Years)                      |              | X            |              |              | X            |              |
| Non-melanoma skin cancer (squamous-cell carcinoma) | Female | Cumulative Cigarettes (10 Years)                      |              | X            |              |              | X            |              |
| Non-melanoma skin cancer (squamous-cell carcinoma) | Male   | Cumulative Cigarettes (5 Years)                       |              | X            |              |              | X            |              |
| Non-melanoma skin cancer (squamous-cell carcinoma) | Female | Cumulative Cigarettes (5 Years)                       |              | X            |              |              | X            |              |
| Non-melanoma skin cancer (squamous-cell carcinoma) | Male   | Cumulative Cigarettes (15 Years)                      |              | X            |              |              | X            |              |
| Non-melanoma skin cancer (squamous-cell carcinoma) | Female | Cumulative Cigarettes (15 Years)                      |              | X            |              |              | X            |              |
| Non-melanoma skin cancer (squamous-cell carcinoma) | Male   | Education (years per capita)                          |              |              | X            |              |              | X            |
| Non-melanoma skin cancer (squamous-cell carcinoma) | Female | Education (years per capita)                          |              |              | X            |              |              | X            |
| Non-melanoma skin cancer (squamous-cell carcinoma) | Male   | Average latitude                                      |              | X            |              |              | X            |              |
| Non-melanoma skin cancer (squamous-cell carcinoma) | Female | Average latitude                                      |              | X            |              |              | X            |              |
| Executions and police conflict                     | Female | Socio-demographic Index                               |              | X            |              |              | X            |              |
| Executions and police conflict                     | Male   | Socio-demographic Index                               |              | X            |              |              | X            |              |
| Executions and police conflict                     | Male   | Healthcare access and quality index                   |              | X            |              |              | X            |              |
| Executions and police conflict                     | Female | Healthcare access and quality index                   |              | X            |              |              | X            |              |
| Executions and police conflict                     | Male   | Population Density (over 1000 ppl/sqkm, proportion)   |              | X            |              |              | X            |              |
| Executions and police conflict                     | Female | Population Density (over 1000 ppl/sqkm, proportion)   |              | X            |              |              | X            |              |
| Executions and police conflict                     | Male   | Education (years per capita)                          |              |              | X            |              |              | X            |
| Executions and police conflict                     | Female | Education (years per capita)                          |              |              | X            |              |              | X            |
| Executions and police conflict                     | Male   | Alcohol (liters per capita)                           |              | X            |              |              | X            |              |
| Executions and police conflict                     | Female | Alcohol (liters per capita)                           |              | X            |              |              | X            |              |
| Executions and police conflict                     | Female | LDI (US per capita)                                   |              |              | X            |              |              | X            |
| Alcoholic cardiomyopathy                           | Female | Alcohol (liters per capita)                           | X            |              |              | X            |              |              |
| Alcoholic cardiomyopathy                           | Female | LDI (US per capita)                                   |              |              |              | X            |              | X            |
| Alcoholic cardiomyopathy                           | Male   | LDI (US per capita)                                   |              |              |              | X            |              | X            |
| Alcoholic cardiomyopathy                           | Male   | Alcohol (liters per capita)                           | X            |              |              | X            |              |              |
| Alcoholic cardiomyopathy                           | Male   | Smoking Prevalence                                    | X            |              |              | X            |              |              |
| Alcoholic cardiomyopathy                           | Male   | Log-transformed SEV scalar: CMP                       | X            |              |              | X            |              |              |
| Alcoholic cardiomyopathy                           | Female | Log-transformed SEV scalar: CMP                       | X            |              |              | X            |              |              |

Appendix Table 10: Comparison of GBD 2016 and GBD 2017 covariates and level of covariates used in cause of death modeling

| Cause                    | Sex    | Covariate                            | Level 1 2017 | Level 2 2017 | Level 3 2017 | Level 1 2016 | Level 2 2016 | Level 3 2016 |
|--------------------------|--------|--------------------------------------|--------------|--------------|--------------|--------------|--------------|--------------|
| Alcoholic cardiomyopathy | Male   | Socio-demographic Index              |              |              | X            |              |              | X            |
| Alcoholic cardiomyopathy | Female | Socio-demographic Index              |              |              | X            |              |              | X            |
| Alcoholic cardiomyopathy | Male   | Healthcare access and quality index  |              | X            |              |              | X            |              |
| Alcoholic cardiomyopathy | Female | Smoking Prevalence                   | X            |              |              | X            |              |              |
| Alcoholic cardiomyopathy | Female | Healthcare access and quality index  |              | X            |              |              | X            |              |
| Myocarditis              | Female | Log-transformed SEV scalar: CMP      | X            |              |              | X            |              |              |
| Myocarditis              | Female | Socio-demographic Index              |              |              | X            |              |              | X            |
| Myocarditis              | Male   | Systolic Blood Pressure (mmHg)       | X            |              |              | X            |              |              |
| Myocarditis              | Male   | Socio-demographic Index              |              |              | X            |              |              | X            |
| Myocarditis              | Female | Healthcare access and quality index  |              | X            |              |              | X            |              |
| Myocarditis              | Male   | Healthcare access and quality index  |              | X            |              |              | X            |              |
| Myocarditis              | Female | LDI (IS per capita)                  |              |              | X            |              |              | X            |
| Myocarditis              | Male   | LDI (IS per capita)                  |              |              | X            |              |              | X            |
| Myocarditis              | Female | Systolic Blood Pressure (mmHg)       | X            |              |              | X            |              |              |
| Myocarditis              | Male   | Log-transformed SEV scalar: CMP      | X            |              |              | X            |              |              |
| Other leukaemia          | Male   | Education (years per capita)         |              |              | X            |              |              | X            |
| Other leukaemia          | Male   | Cumulative Cigarettes (20 Years)     |              | X            |              |              | X            |              |
| Other leukaemia          | Female | Cumulative Cigarettes (20 Years)     |              | X            |              |              | X            |              |
| Other leukaemia          | Female | Log-transformed SEV scalar: Leukemia | X            |              | X            |              |              | X            |
| Other leukaemia          | Male   | Log-transformed SEV scalar: Leukemia | X            |              |              | X            |              |              |
| Other leukaemia          | Male   | Alcohol (liters per capita)          |              | X            |              |              | X            |              |
| Other leukaemia          | Female | Alcohol (liters per capita)          |              | X            |              |              | X            |              |
| Other leukaemia          | Male   | Tobacco (cigarettes per capita)      |              | X            |              |              | X            |              |
| Other leukaemia          | Female | Tobacco (cigarettes per capita)      |              | X            |              |              | X            |              |
| Other leukaemia          | Male   | Cumulative Cigarettes (15 Years)     |              | X            |              |              | X            |              |
| Other leukaemia          | Male   | Cumulative Cigarettes (5 Years)      |              | X            |              |              | X            |              |
| Other leukaemia          | Male   | Cumulative Cigarettes (10 Years)     |              | X            |              |              | X            |              |
| Other leukaemia          | Female | Cumulative Cigarettes (10 Years)     |              | X            |              |              | X            |              |
| Other leukaemia          | Male   | Smoking Prevalence                   |              | X            |              |              | X            |              |
| Other leukaemia          | Female | Smoking Prevalence                   |              | X            |              |              | X            |              |
| Other leukaemia          | Male   | Socio-demographic Index              |              |              | X            |              |              | X            |
| Other leukaemia          | Female | Socio-demographic Index              |              |              | X            |              |              | X            |
| Other leukaemia          | Male   | LDI (IS per capita)                  |              |              | X            |              |              | X            |
| Other leukaemia          | Female | LDI (IS per capita)                  |              |              | X            |              |              | X            |
| Other leukaemia          | Female | Cumulative Cigarettes (5 Years)      |              | X            |              |              | X            |              |
| Other leukaemia          | Female | Cumulative Cigarettes (15 Years)     |              | X            |              |              | X            |              |
| Other cardiomyopathy     | Male   | LDI (IS per capita)                  |              |              | X            |              |              | X            |
| Other cardiomyopathy     | Male   | Log-transformed SEV scalar: CMP      | X            |              |              | X            |              |              |
| Other cardiomyopathy     | Male   | Smoking Prevalence                   | X            |              |              | X            |              |              |
| Other cardiomyopathy     | Female | Systolic Blood Pressure (mmHg)       | X            |              |              | X            |              |              |
| Other cardiomyopathy     | Male   | Systolic Blood Pressure (mmHg)       | X            |              |              | X            |              |              |
| Other cardiomyopathy     | Female | Socio-demographic Index              |              |              | X            |              |              | X            |
| Other cardiomyopathy     | Male   | Socio-demographic Index              |              |              | X            |              |              | X            |
| Other cardiomyopathy     | Female | Mean BMI                             |              | X            |              |              | X            |              |
| Other cardiomyopathy     | Male   | Mean BMI                             |              | X            |              |              | X            |              |
| Other cardiomyopathy     | Female | Healthcare access and quality index  |              | X            |              |              | X            |              |
| Other cardiomyopathy     | Male   | Healthcare access and quality index  |              | X            |              |              | X            |              |
| Other cardiomyopathy     | Female | LDI (IS per capita)                  |              |              | X            |              |              | X            |
| Other cardiomyopathy     | Female | Log-transformed SEV scalar: CMP      | X            |              |              | X            |              |              |
| Other cardiomyopathy     | Female | Smoking Prevalence                   | X            |              |              | X            |              |              |

**Appendix Table 11. CODEm predictive validity results by cause, model type, sex, and age**

| Cause                                                                | Sex    | Age Start   | Age End     | RMSE In-Sample | RMSE Out-of-Sample | Trend In-Sample | Trend Out-of-Sample | Coverage In-Sample | Coverage Out-of-Sample |
|----------------------------------------------------------------------|--------|-------------|-------------|----------------|--------------------|-----------------|---------------------|--------------------|------------------------|
| Diarrhoeal diseases [Data Rich]                                      | Male   | 5-9 years   | 95+ years   | 0.280469       | 0.510001           | 0.180379        | 0.222166            | 0.997797           | 0.997146               |
| Diarrhoeal diseases [Data Rich]                                      | Female | 5-9 years   | 95+ years   | 0.269759       | 0.515443           | 0.172057        | 0.206163            | 0.995005           | 0.994416               |
| Diarrhoeal diseases [Global]                                         | Male   | 0-6 days    | 1-4 years   | 0.33912        | 0.799222           | 0.250318        | 0.250523            | 0.998668           | 0.970605               |
| Diarrhoeal diseases [Global]                                         | Female | 0-6 days    | 1-4 years   | 0.335586       | 0.843134           | 0.252213        | 0.256               | 0.998944           | 0.971247               |
| Diarrhoeal diseases [Global]                                         | Female | 5-9 years   | 95+ years   | 0.531729       | 0.959145           | 0.210555        | 0.221878            | 0.996407           | 0.971134               |
| Diarrhoeal diseases [Global]                                         | Male   | 5-9 years   | 95+ years   | 0.629407       | 0.905591           | 0.224539        | 0.230701            | 0.997838           | 0.982117               |
| Diarrhoeal diseases [Data Rich]                                      | Male   | 0-6 days    | 1-4 years   | 0.256015       | 0.45015            | 0.170155        | 0.214105            | 0.999351           | 0.998266               |
| Diarrhoeal diseases [Data Rich]                                      | Female | 0-6 days    | 1-4 years   | 0.266046       | 0.454333           | 0.178792        | 0.208693            | 0.9996             | 0.998586               |
| Lower respiratory infections [Data Rich]                             | Female | 0-6 days    | 1-4 years   | 0.191668       | 0.262922           | 0.144965        | 0.158509            | 0.999487           | 0.998804               |
| Lower respiratory infections [Data Rich]                             | Male   | 0-6 days    | 1-4 years   | 0.203545       | 0.277933           | 0.154564        | 0.17548             | 0.999573           | 0.998671               |
| Lower respiratory infections [Global]                                | Female | 5-9 years   | 95+ years   | 0.237279       | 0.368152           | 0.158826        | 0.16906             | 0.999696           | 0.990464               |
| Lower respiratory infections [Global]                                | Male   | 5-9 years   | 95+ years   | 0.245471       | 0.370942           | 0.1603          | 0.169869            | 0.999731           | 0.986252               |
| Lower respiratory infections [Global]                                | Male   | 0-6 days    | 1-4 years   | 0.255822       | 0.372602           | 0.189113        | 0.185891            | 0.999036           | 0.991881               |
| Lower respiratory infections [Data Rich]                             | Female | 5-9 years   | 95+ years   | 0.192211       | 0.276291           | 0.140718        | 0.18335             | 0.999776           | 0.999229               |
| Lower respiratory infections [Data Rich]                             | Male   | 5-9 years   | 95+ years   | 0.198629       | 0.291259           | 0.143585        | 0.190904            | 0.999833           | 0.999182               |
| Lower respiratory infections [Global]                                | Female | 0-6 days    | 1-4 years   | 0.246136       | 0.364791           | 0.182759        | 0.177625            | 0.999209           | 0.991685               |
| Upper respiratory infections [Data Rich]                             | Female | 0-6 days    | 95+ years   | 0.44335        | 0.771393           | 0.33457         | 0.358177            | 0.994359           | 0.99034                |
| Upper respiratory infections [Global]                                | Female | 0-6 days    | 95+ years   | 0.61976        | 1.12961            | 0.391232        | 0.406816            | 0.989994           | 0.958096               |
| Upper respiratory infections [Global]                                | Male   | 0-6 days    | 95+ years   | 0.59844        | 0.963846           | 0.377335        | 0.363689            | 0.990459           | 0.958039               |
| Upper respiratory infections [Data Rich]                             | Male   | 0-6 days    | 95+ years   | 0.420399       | 0.659201           | 0.332323        | 0.342797            | 0.994005           | 0.989208               |
| Otitis media [Data Rich]                                             | Female | 0-6 days    | 95+ years   | 1.00467        | 1.69116            | 0.834109        | 0.833018            | 0.957694           | 0.919475               |
| Otitis media [Global]                                                | Female | 0-6 days    | 95+ years   | 1.11345        | 2.03599            | 0.896114        | 0.934399            | 0.957675           | 0.875086               |
| Otitis media [Global]                                                | Male   | 0-6 days    | 95+ years   | 1.13482        | 1.98862            | 0.943641        | 0.963469            | 0.956513           | 0.872904               |
| Otitis media [Data Rich]                                             | Male   | 0-6 days    | 95+ years   | 1.02707        | 1.83432            | 0.870469        | 0.890958            | 0.955706           | 0.910549               |
| Meningitis [Global]                                                  | Male   | 5-9 years   | 95+ years   | 0.279735       | 0.418234           | 0.179778        | 0.177219            | 0.999405           | 0.994387               |
| Meningitis [Data Rich]                                               | Female | 5-9 years   | 95+ years   | 0.203289       | 0.300588           | 0.154856        | 0.172646            | 0.999887           | 0.99977                |
| Meningitis [Data Rich]                                               | Male   | 5-9 years   | 95+ years   | 0.196905       | 0.290648           | 0.145754        | 0.158202            | 0.999875           | 0.999762               |
| Meningitis [Data Rich]                                               | Male   | 0-6 days    | 1-4 years   | 0.216223       | 0.329264           | 0.155493        | 0.174645            | 0.999905           | 0.999736               |
| Meningitis [Data Rich]                                               | Female | 0-6 days    | 1-4 years   | 0.206262       | 0.325769           | 0.150565        | 0.171187            | 0.999872           | 0.999776               |
| Meningitis [Global]                                                  | Female | 5-9 years   | 95+ years   | 0.297621       | 0.43552            | 0.193009        | 0.193801            | 0.999393           | 0.994343               |
| Meningitis [Global]                                                  | Female | 0-6 days    | 1-4 years   | 0.30413        | 0.466564           | 0.238037        | 0.228694            | 0.999367           | 0.993627               |
| Meningitis [Global]                                                  | Male   | 0-6 days    | 1-4 years   | 0.289053       | 0.425283           | 0.214728        | 0.209052            | 0.999561           | 0.994199               |
| Encephalitis [Data Rich]                                             | Female | 0-6 days    | 95+ years   | 0.272718       | 0.410367           | 0.186841        | 0.220558            | 0.999773           | 0.999047               |
| Encephalitis [Data Rich]                                             | Male   | 0-6 days    | 95+ years   | 0.243869       | 0.380035           | 0.17404         | 0.196849            | 0.999913           | 0.999748               |
| Encephalitis [Global]                                                | Female | 0-6 days    | 95+ years   | 0.317469       | 0.535501           | 0.214328        | 0.216548            | 0.99866            | 0.989896               |
| Encephalitis [Global]                                                | Male   | 0-6 days    | 95+ years   | 0.331965       | 0.573588           | 0.212555        | 0.220988            | 0.997667           | 0.992445               |
| Tetanus [Global]                                                     | Male   | 1-4 years   | 95+ years   | 0.956728       | 1.63487            | 0.695214        | 0.732387            | 0.683691           | 0.675581               |
| Tetanus [Global]                                                     | Female | 0-6 days    | 28-364 days | 0.996966       | 1.78851            | 0.907626        | 0.883697            | 0.807703           | 0.779101               |
| Tetanus [Global]                                                     | Male   | 0-6 days    | 28-364 days | 0.998991       | 1.72773            | 0.962381        | 0.872892            | 0.820372           | 0.794077               |
| Tetanus [Global]                                                     | Female | 1-4 years   | 95+ years   | 1.02879        | 1.85631            | 0.736548        | 0.757767            | 0.634561           | 0.623972               |
| Tetanus [Data Rich]                                                  | Female | 1-4 years   | 95+ years   | 0.828126       | 1.14723            | 0.685613        | 0.743106            | 0.968862           | 0.951756               |
| Tetanus [Data Rich]                                                  | Male   | 0-6 days    | 28-364 days | 0.726004       | 1.06979            | 0.614703        | 0.786509            | 0.983875           | 0.972156               |
| Tetanus [Data Rich]                                                  | Male   | 1-4 years   | 95+ years   | 0.784187       | 1.14364            | 0.649943        | 0.739216            | 0.978414           | 0.963547               |
| Tetanus [Data Rich]                                                  | Female | 0-6 days    | 28-364 days | 0.74343        | 1.06887            | 0.611041        | 0.698597            | 0.980799           | 0.969568               |
| Dengue [Data Rich]                                                   | Female | 28-364 days | 95+ years   | 1.00785        | 1.58434            | 0.588775        | 0.620491            | 0.453514           | 0.432086               |
| Dengue [Data Rich]                                                   | Male   | 28-364 days | 95+ years   | 0.917226       | 1.41028            | 0.671588        | 0.714753            | 0.987297           | 0.950393               |
| Dengue [Global]                                                      | Female | 28-364 days | 95+ years   | 0.9102         | 1.58752            | 0.634112        | 0.657953            | 0.980839           | 0.932881               |
| Dengue [Global]                                                      | Male   | 28-364 days | 95+ years   | 0.933711       | 1.62694            | 0.701536        | 0.737067            | 0.983664           | 0.937484               |
| Rabies [Global]                                                      | Male   | 28-364 days | 95+ years   | 0.860233       | 1.60491            | 0.640893        | 0.651991            | 0.982972           | 0.923045               |
| Rabies [Data Rich]                                                   | Male   | 28-364 days | 95+ years   | 0.780182       | 1.27594            | 0.613917        | 0.669128            | 0.984206           | 0.946193               |
| Rabies [Data Rich]                                                   | Female | 28-364 days | 95+ years   | 0.806994       | 1.28376            | 0.651185        | 0.727099            | 0.982885           | 0.94263                |
| Rabies [Global]                                                      | Female | 28-364 days | 95+ years   | 0.942867       | 1.65412            | 0.684649        | 0.718534            | 0.98284            | 0.925199               |
| Other neglected tropical diseases [Global]                           | Male   | 0-6 days    | 95+ years   | 0.672937       | 1.2466             | 0.456692        | 0.493877            | 0.99434            | 0.957278               |
| Other neglected tropical diseases [Global]                           | Female | 0-6 days    | 95+ years   | 0.717608       | 1.21824            | 0.452723        | 0.471578            | 0.994043           | 0.951498               |
| Other neglected tropical diseases [Data Rich]                        | Male   | 0-6 days    | 95+ years   | 0.649753       | 1.08269            | 0.434889        | 0.503418            | 0.995667           | 0.991817               |
| Other neglected tropical diseases [Data Rich]                        | Female | 0-6 days    | 95+ years   | 0.626717       | 1.1182             | 0.416123        | 0.468271            | 0.99565            | 0.991203               |
| Neonatal disorders [Global]                                          | Female | 0-6 days    | 1-4 years   | 0.246286       | 0.392215           | 0.169284        | 0.17907             | 0.999407           | 0.993616               |
| Neonatal disorders [Global]                                          | Male   | 0-6 days    | 1-4 years   | 0.249643       | 0.404502           | 0.165214        | 0.173881            | 0.999387           | 0.993524               |
| Neonatal disorders [Data Rich]                                       | Female | 0-6 days    | 1-4 years   | 0.181432       | 0.311826           | 0.128228        | 0.206297            | 0.999691           | 0.99875                |
| Neonatal disorders [Data Rich]                                       | Male   | 0-6 days    | 1-4 years   | 0.181953       | 0.325748           | 0.124671        | 0.193675            | 0.999502           | 0.99871                |
| Neonatal preterm birth [Data Rich]                                   | Male   | 0-6 days    | 1-4 years   | 0.19643        | 0.450235           | 0.130784        | 0.196504            | 0.999643           | 0.998319               |
| Neonatal preterm birth [Data Rich]                                   | Female | 0-6 days    | 1-4 years   | 0.183435       | 0.379063           | 0.127938        | 0.179256            | 0.99969            | 0.998286               |
| Neonatal preterm birth [Global]                                      | Female | 0-6 days    | 1-4 years   | 0.242668       | 0.395624           | 0.16524         | 0.172088            | 0.999434           | 0.990967               |
| Neonatal preterm birth [Global]                                      | Male   | 0-6 days    | 1-4 years   | 0.254335       | 0.432646           | 0.168426        | 0.187376            | 0.999455           | 0.988115               |
| Neonatal encephalopathy due to birth asphyxia and trauma [Data Rich] | Male   | 0-6 days    | 1-4 years   | 0.214787       | 0.429059           | 0.150316        | 0.202665            | 0.999627           | 0.999045               |
| Neonatal encephalopathy due to birth asphyxia and trauma [Data Rich] | Female | 0-6 days    | 1-4 years   | 0.210671       | 0.415153           | 0.150147        | 0.212483            | 0.999708           | 0.998925               |
| Neonatal encephalopathy due to birth asphyxia and trauma [Global]    | Female | 0-6 days    | 1-4 years   | 0.277119       | 0.451854           | 0.181848        | 0.191493            | 0.999619           | 0.992718               |
| Neonatal encephalopathy due to birth asphyxia and trauma [Global]    | Male   | 0-6 days    | 1-4 years   | 0.288931       | 0.481734           | 0.184747        | 0.194794            | 0.999204           | 0.99305                |
| Neonatal sepsis and other neonatal infections [Global]               | Male   | 0-6 days    | 1-4 years   | 0.464427       | 1.15755            | 0.28157         | 0.299903            | 0.952012           | 0.936046               |
| Neonatal sepsis and other neonatal infections [Global]               | Female | 0-6 days    | 1-4 years   | 0.683671       | 1.18121            | 0.410178        | 0.42631             | 0.955162           | 0.936339               |
| Neonatal sepsis and other neonatal infections [Data Rich]            | Female | 0-6 days    | 1-4 years   | 0.64145        | 1.36638            | 0.371374        | 0.427765            | 0.947115           | 0.947177               |
| Neonatal sepsis and other neonatal infections [Data Rich]            | Male   | 0-6 days    | 1-4 years   | 0.435438       | 1.10235            | 0.228524        | 0.274002            | 0.945425           | 0.951063               |
| Hemolytic disease and other neonatal jaundice [Data Rich]            | Male   | 0-6 days    | 1-4 years   | 0.599486       | 1.34121            | 0.472576        | 0.597158            | 0.918141           | 0.917195               |
| Hemolytic disease and other neonatal jaundice [Data Rich]            | Female | 0-6 days    | 1-4 years   | 0.843323       | 1.7476             | 0.660276        | 0.852927            | 0.903526           | 0.902342               |

**Appendix Table 11. CODEm predictive validity results by cause, model type, sex, and age**

| Cause                                                     | Sex    | Age Start   | Age End   | RMSE In-Sample | RMSE Out-of-Sample | Trend In-Sample | Trend Out-of-Sample | Coverage In-Sample | Coverage Out-of-Sample |
|-----------------------------------------------------------|--------|-------------|-----------|----------------|--------------------|-----------------|---------------------|--------------------|------------------------|
| Hemolytic disease and other neonatal jaundice [Global]    | Female | 0-6 days    | 1-4 years | 0.876525       | 1.58065            | 0.671232        | 0.726574            | 0.915113           | 0.897093               |
| Hemolytic disease and other neonatal jaundice [Global]    | Male   | 0-6 days    | 1-4 years | 0.648536       | 1.36397            | 0.489818        | 0.501689            | 0.924275           | 0.901872               |
| Other neonatal disorders [Data Rich]                      | Male   | 0-6 days    | 1-4 years | 0.256746       | 0.458408           | 0.186947        | 0.285283            | 0.999407           | 0.997831               |
| Other neonatal disorders [Data Rich]                      | Female | 0-6 days    | 1-4 years | 0.249994       | 0.445694           | 0.180969        | 0.268363            | 0.999571           | 0.997957               |
| Other neonatal disorders [Global]                         | Male   | 0-6 days    | 1-4 years | 0.299647       | 0.526023           | 0.207229        | 0.232945            | 0.999061           | 0.987607               |
| Other neonatal disorders [Global]                         | Female | 0-6 days    | 1-4 years | 0.295983       | 0.514127           | 0.20874         | 0.228801            | 0.999242           | 0.989602               |
| Nutritional deficiencies [Global]                         | Female | 28-364 days | 95+ years | 0.301899       | 0.614005           | 0.199685        | 0.210875            | 0.993092           | 0.970106               |
| Nutritional deficiencies [Global]                         | Male   | 28-364 days | 95+ years | 0.29753        | 0.619265           | 0.20675         | 0.215432            | 0.995417           | 0.978237               |
| Nutritional deficiencies [Data Rich]                      | Male   | 28-364 days | 95+ years | 0.236629       | 0.358096           | 0.167877        | 0.20248             | 0.995959           | 0.995046               |
| Nutritional deficiencies [Data Rich]                      | Female | 28-364 days | 95+ years | 0.238101       | 0.367482           | 0.15925         | 0.194465            | 0.993471           | 0.992369               |
| Protein-energy malnutrition [Data Rich]                   | Male   | 28-364 days | 1-4 years | 0.361929       | 0.554427           | 0.286056        | 0.382635            | 0.977608           | 0.975749               |
| Protein-energy malnutrition [Global]                      | Female | 5-9 years   | 95+ years | 0.37757        | 0.844942           | 0.254975        | 0.263816            | 0.95484            | 0.924926               |
| Protein-energy malnutrition [Global]                      | Female | 28-364 days | 1-4 years | 0.415687       | 0.761087           | 0.304258        | 0.270495            | 0.978447           | 0.951805               |
| Protein-energy malnutrition [Data Rich]                   | Female | 5-9 years   | 95+ years | 0.617555       | 0.736211           | 0.235406        | 0.262289            | 0.951219           | 0.953162               |
| Protein-energy malnutrition [Data Rich]                   | Male   | 5-9 years   | 95+ years | 0.472945       | 0.570257           | 0.236296        | 0.265284            | 0.964611           | 0.964891               |
| Protein-energy malnutrition [Global]                      | Male   | 28-364 days | 1-4 years | 0.442462       | 0.840751           | 0.335749        | 0.366971            | 0.977834           | 0.952264               |
| Protein-energy malnutrition [Global]                      | Female | 5-9 years   | 95+ years | 0.376296       | 0.836289           | 0.266037        | 0.279376            | 0.967225           | 0.940931               |
| Protein-energy malnutrition [Data Rich]                   | Male   | 28-364 days | 1-4 years | 0.334136       | 0.518123           | 0.25932         | 0.329281            | 0.97882            | 0.975427               |
| Dietary iron deficiency [Data Rich]                       | Female | 28-364 days | 95+ years | 2.331          | 3.14119            | 0.71212         | 0.759086            | 0.418801           | 0.325588               |
| Dietary iron deficiency [Data Rich]                       | Male   | 28-364 days | 95+ years | 2.26439        | 2.74546            | 0.688607        | 0.716749            | 0.45718            | 0.422232               |
| Dietary iron deficiency [Global]                          | Male   | 28-364 days | 95+ years | 2.02745        | 2.6614             | 0.726221        | 0.738701            | 0.518323           | 0.494679               |
| Dietary iron deficiency [Global]                          | Female | 28-364 days | 95+ years | 2.28357        | 2.97947            | 0.749936        | 0.776672            | 0.481559           | 0.433505               |
| Other nutritional deficiencies [Data Rich]                | Male   | 28-364 days | 95+ years | 0.277037       | 0.476225           | 0.198304        | 0.21379             | 0.966854           | 0.965066               |
| Other nutritional deficiencies [Global]                   | Male   | 28-364 days | 95+ years | 0.348438       | 0.718419           | 0.240221        | 0.241463            | 0.968564           | 0.961239               |
| Other nutritional deficiencies [Data Rich]                | Female | 28-364 days | 95+ years | 0.272248       | 0.506226           | 0.192065        | 0.215357            | 0.975407           | 0.973924               |
| Other nutritional deficiencies [Global]                   | Female | 28-364 days | 95+ years | 0.352753       | 0.696398           | 0.239493        | 0.248356            | 0.974604           | 0.965685               |
| Sexually transmitted infections excluding HIV [Global]    | Male   | 10-14 years | 95+ years | 0.808105       | 1.29923            | 0.581951        | 0.570983            | 0.871967           | 0.861889               |
| Sexually transmitted infections excluding HIV [Data Rich] | Male   | 10-14 years | 95+ years | 0.606071       | 0.794076           | 0.486073        | 0.446152            | 0.984496           | 0.972543               |
| Sexually transmitted infections excluding HIV [Data Rich] | Female | 10-14 years | 95+ years | 0.300735       | 0.411839           | 0.228296        | 0.252181            | 0.994286           | 0.993627               |
| Sexually transmitted infections excluding HIV [Global]    | Female | 10-14 years | 95+ years | 0.450602       | 0.641496           | 0.365953        | 0.347335            | 0.987929           | 0.979432               |
| Acute hepatitis [Global]                                  | Male   | 28-364 days | 95+ years | 0.409309       | 0.713192           | 0.261593        | 0.271648            | 0.996734           | 0.983115               |
| Acute hepatitis [Global]                                  | Female | 28-364 days | 95+ years | 0.379449       | 0.691669           | 0.266513        | 0.280222            | 0.997325           | 0.985348               |
| Acute hepatitis [Data Rich]                               | Male   | 28-364 days | 95+ years | 0.312814       | 0.446298           | 0.228924        | 0.260088            | 0.997223           | 0.996496               |
| Acute hepatitis [Data Rich]                               | Female | 28-364 days | 95+ years | 0.315789       | 0.446105           | 0.229038        | 0.2594              | 0.997875           | 0.997376               |
| Other unspecified infectious diseases [Global]            | Male   | 0-6 days    | 95+ years | 0.361978       | 0.543408           | 0.292588        | 0.280599            | 0.998422           | 0.988771               |
| Other unspecified infectious diseases [Global]            | Female | 0-6 days    | 95+ years | 0.362406       | 0.521514           | 0.298174        | 0.298396            | 0.998438           | 0.991859               |
| Other unspecified infectious diseases [Data Rich]         | Male   | 0-6 days    | 95+ years | 0.263137       | 0.369844           | 0.177479        | 0.219032            | 0.999248           | 0.998938               |
| Other unspecified infectious diseases [Data Rich]         | Female | 0-6 days    | 95+ years | 0.246815       | 0.351423           | 0.178077        | 0.211261            | 0.999235           | 0.998981               |
| Oesophageal cancer [Data Rich]                            | Male   | 15-19 years | 95+ years | 0.229298       | 0.282838           | 0.18924         | 0.206517            | 0.998339           | 0.997192               |
| Oesophageal cancer [Data Rich]                            | Female | 15-19 years | 95+ years | 0.223671       | 0.275475           | 0.184712        | 0.208867            | 0.998397           | 0.997466               |
| Oesophageal cancer [Global]                               | Female | 15-19 years | 95+ years | 0.267743       | 0.438706           | 0.212478        | 0.217283            | 0.997572           | 0.983452               |
| Oesophageal cancer [Global]                               | Male   | 15-19 years | 95+ years | 0.259647       | 0.409441           | 0.208058        | 0.200438            | 0.997495           | 0.983569               |
| Stomach cancer [Global]                                   | Female | 15-19 years | 95+ years | 0.220388       | 0.321622           | 0.176056        | 0.174708            | 0.997707           | 0.980621               |
| Stomach cancer [Global]                                   | Male   | 15-19 years | 95+ years | 0.219859       | 0.316905           | 0.173849        | 0.174548            | 0.997207           | 0.978907               |
| Stomach cancer [Data Rich]                                | Male   | 15-19 years | 95+ years | 0.188107       | 0.227466           | 0.154215        | 0.167484            | 0.997405           | 0.9952                 |
| Stomach cancer [Data Rich]                                | Female | 15-19 years | 95+ years | 0.18503        | 0.224698           | 0.152285        | 0.171074            | 0.997184           | 0.995041               |
| Liver cancer [Data Rich]                                  | Female | 5-9 years   | 95+ years | 0.235751       | 0.306503           | 0.191824        | 0.21636             | 0.997521           | 0.996043               |
| Liver cancer [Data Rich]                                  | Male   | 5-9 years   | 95+ years | 0.228206       | 0.292358           | 0.186686        | 0.208676            | 0.998237           | 0.997094               |
| Liver cancer [Global]                                     | Male   | 5-9 years   | 95+ years | 0.272725       | 0.425065           | 0.215825        | 0.219678            | 0.998206           | 0.983238               |
| Liver cancer [Global]                                     | Female | 5-9 years   | 95+ years | 0.279976       | 0.421191           | 0.219736        | 0.226207            | 0.997793           | 0.9893                 |
| Larynx cancer [Data Rich]                                 | Male   | 15-19 years | 95+ years | 0.23688        | 0.284413           | 0.195922        | 0.209992            | 0.996165           | 0.995733               |
| Larynx cancer [Data Rich]                                 | Female | 15-19 years | 95+ years | 0.32652        | 0.399864           | 0.275329        | 0.313719            | 0.97711            | 0.979648               |
| Larynx cancer [Global]                                    | Male   | 15-19 years | 95+ years | 0.281143       | 0.381443           | 0.224378        | 0.216945            | 0.996895           | 0.987364               |
| Larynx cancer [Global]                                    | Female | 15-19 years | 95+ years | 0.380013       | 0.543116           | 0.304664        | 0.29662             | 0.980328           | 0.97334                |
| Tracheal, bronchus, and lung cancer [Global]              | Female | 15-19 years | 95+ years | 0.260332       | 0.368101           | 0.206681        | 0.204078            | 0.998344           | 0.986048               |
| Tracheal, bronchus, and lung cancer [Global]              | Male   | 15-19 years | 95+ years | 0.263744       | 0.345652           | 0.206319        | 0.202033            | 0.997715           | 0.980248               |
| Tracheal, bronchus, and lung cancer [Data Rich]           | Male   | 15-19 years | 95+ years | 0.208622       | 0.257399           | 0.173001        | 0.193049            | 0.996634           | 0.993872               |
| Tracheal, bronchus, and lung cancer [Data Rich]           | Female | 15-19 years | 95+ years | 0.216781       | 0.274039           | 0.17731         | 0.199203            | 0.997245           | 0.994891               |
| Breast cancer [Data Rich]                                 | Male   | 15-19 years | 95+ years | 0.335672       | 0.417495           | 0.281886        | 0.334037            | 0.982567           | 0.982668               |
| Breast cancer [Data Rich]                                 | Female | 15-19 years | 95+ years | 0.201223       | 0.24194            | 0.164877        | 0.182083            | 0.994124           | 0.990163               |
| Breast cancer [Global]                                    | Male   | 15-19 years | 95+ years | 0.404613       | 0.546555           | 0.323447        | 0.332522            | 0.981399           | 0.974991               |
| Breast cancer [Global]                                    | Female | 15-19 years | 95+ years | 0.217748       | 0.2854             | 0.170611        | 0.173297            | 0.994464           | 0.987499               |
| Cervical cancer [Data Rich]                               | Female | 15-19 years | 95+ years | 0.235917       | 0.282739           | 0.199481        | 0.220218            | 0.996916           | 0.994649               |
| Cervical cancer [Global]                                  | Female | 15-19 years | 95+ years | 0.261824       | 0.346907           | 0.21464         | 0.210358            | 0.997774           | 0.989976               |
| Uterine cancer [Data Rich]                                | Female | 15-19 years | 95+ years | 0.284045       | 0.333571           | 0.237777        | 0.241792            | 0.996148           | 0.993771               |
| Uterine cancer [Global]                                   | Female | 15-19 years | 95+ years | 0.340379       | 0.427043           | 0.275573        | 0.266054            | 0.996863           | 0.990423               |
| Prostate cancer [Data Rich]                               | Male   | 15-19 years | 95+ years | 0.236668       | 0.275893           | 0.192484        | 0.198499            | 0.994859           | 0.991428               |
| Prostate cancer [Global]                                  | Male   | 15-19 years | 95+ years | 0.246937       | 0.312672           | 0.192155        | 0.186539            | 0.994135           | 0.985591               |
| Colon and rectum cancer [Data Rich]                       | Male   | 15-19 years | 95+ years | 0.20508        | 0.247359           | 0.170352        | 0.190901            | 0.997068           | 0.995139               |
| Colon and rectum cancer [Data Rich]                       | Female | 15-19 years | 95+ years | 0.197604       | 0.240495           | 0.163563        | 0.184614            | 0.995455           | 0.9927                 |
| Colon and rectum cancer [Global]                          | Female | 15-19 years | 95+ years | 0.216529       | 0.289707           | 0.174333        | 0.177601            | 0.996788           | 0.992166               |
| Colon and rectum cancer [Global]                          | Male   | 15-19 years | 95+ years | 0.229035       | 0.295793           | 0.183815        | 0.184261            | 0.997722           | 0.991286               |
| Lip and oral cavity cancer [Global]                       | Female | 15-19 years | 95+ years | 0.261191       | 0.360463           | 0.203231        | 0.203986            | 0.999621           | 0.997062               |
| Lip and oral cavity cancer [Global]                       | Male   | 15-19 years | 95+ years | 0.281919       | 0.374423           | 0.230234        | 0.223408            | 0.998712           | 0.99342                |
| Lip and oral cavity cancer [Data Rich]                    | Female | 15-19 years | 95+ years | 0.224935       | 0.273083           | 0.186016        | 0.199503            | 0.999714           | 0.999377               |
| Lip and oral cavity cancer [Data Rich]                    | Male   | 15-19 years | 95+ years | 0.258795       | 0.306172           | 0.215884        | 0.216741            | 0.998842           | 0.997662               |

**Appendix Table 11. CODEm predictive validity results by cause, model type, sex, and age**

| Cause                                            | Sex    | Age Start   | Age End   | RMSE In-Sample | RMSE Out-of-Sample | Trend In-Sample | Trend Out-of-Sample | Coverage In-Sample | Coverage Out-of-Sample |
|--------------------------------------------------|--------|-------------|-----------|----------------|--------------------|-----------------|---------------------|--------------------|------------------------|
| Nasopharynx cancer [Global]                      | Male   | 5-9 years   | 95+ years | 0.324568       | 0.486106           | 0.271555        | 0.263855            | 0.999186           | 0.988635               |
| Nasopharynx cancer [Global]                      | Female | 5-9 years   | 95+ years | 0.380497       | 0.491361           | 0.318424        | 0.323438            | 0.994858           | 0.988394               |
| Nasopharynx cancer [Data Rich]                   | Male   | 5-9 years   | 95+ years | 0.302405       | 0.363337           | 0.262272        | 0.27606             | 0.999391           | 0.998906               |
| Nasopharynx cancer [Data Rich]                   | Female | 5-9 years   | 95+ years | 0.330246       | 0.386358           | 0.290203        | 0.307386            | 0.995423           | 0.995138               |
| Other pharynx cancer [Global]                    | Male   | 15-19 years | 95+ years | 0.312625       | 0.420587           | 0.251725        | 0.25148             | 0.997196           | 0.993852               |
| Other pharynx cancer [Global]                    | Female | 15-19 years | 95+ years | 0.303196       | 0.446437           | 0.234854        | 0.231236            | 0.998094           | 0.9907                 |
| Other pharynx cancer [Data Rich]                 | Male   | 15-19 years | 95+ years | 0.283277       | 0.339881           | 0.236209        | 0.245269            | 0.996778           | 0.99664                |
| Other pharynx cancer [Data Rich]                 | Female | 15-19 years | 95+ years | 0.264308       | 0.33092            | 0.218032        | 0.231724            | 0.99778            | 0.997271               |
| Gallbladder and biliary tract cancer [Global]    | Male   | 15-19 years | 95+ years | 0.262593       | 0.350053           | 0.202209        | 0.197368            | 0.998684           | 0.990053               |
| Gallbladder and biliary tract cancer [Global]    | Female | 15-19 years | 95+ years | 0.254404       | 0.374921           | 0.193745        | 0.196745            | 0.997025           | 0.98539                |
| Gallbladder and biliary tract cancer [Data Rich] | Male   | 15-19 years | 95+ years | 0.222193       | 0.271424           | 0.18238         | 0.189641            | 0.998148           | 0.997083               |
| Gallbladder and biliary tract cancer [Data Rich] | Female | 15-19 years | 95+ years | 0.208878       | 0.2605             | 0.170223        | 0.179972            | 0.996144           | 0.994452               |
| Pancreatic cancer [Data Rich]                    | Male   | 15-19 years | 95+ years | 0.213044       | 0.271232           | 0.174348        | 0.199687            | 0.997903           | 0.996507               |
| Pancreatic cancer [Global]                       | Female | 15-19 years | 95+ years | 0.239052       | 0.32475            | 0.185913        | 0.185142            | 0.998314           | 0.994254               |
| Pancreatic cancer [Global]                       | Male   | 15-19 years | 95+ years | 0.247534       | 0.343655           | 0.198268        | 0.209846            | 0.997907           | 0.994553               |
| Pancreatic cancer [Data Rich]                    | Female | 15-19 years | 95+ years | 0.238247       | 0.300582           | 0.198614        | 0.224261            | 0.997289           | 0.995613               |
| Malignant skin melanoma [Data Rich]              | Male   | 15-19 years | 95+ years | 0.259609       | 0.303851           | 0.207311        | 0.220986            | 0.999105           | 0.998673               |
| Malignant skin melanoma [Data Rich]              | Female | 15-19 years | 95+ years | 0.28243        | 0.348954           | 0.216421        | 0.241349            | 0.999356           | 0.999072               |
| Malignant skin melanoma [Global]                 | Male   | 15-19 years | 95+ years | 0.341429       | 0.459742           | 0.244246        | 0.238153            | 0.999121           | 0.990945               |
| Malignant skin melanoma [Global]                 | Female | 15-19 years | 95+ years | 0.315652       | 0.416043           | 0.234699        | 0.227063            | 0.998836           | 0.993317               |
| Non-melanoma skin cancer [Global]                | Male   | 15-19 years | 95+ years | 0.187141       | 0.32129            | 0.129883        | 0.136883            | 0.99967            | 0.996208               |
| Non-melanoma skin cancer [Global]                | Female | 15-19 years | 95+ years | 0.322498       | 0.506636           | 0.206912        | 0.217091            | 0.993396           | 0.983872               |
| Non-melanoma skin cancer [Data Rich]             | Male   | 15-19 years | 95+ years | 0.148854       | 0.245776           | 0.108863        | 0.131861            | 0.999878           | 0.999662               |
| Non-melanoma skin cancer [Data Rich]             | Female | 15-19 years | 95+ years | 0.211171       | 0.323551           | 0.159052        | 0.186755            | 0.997692           | 0.997472               |
| Ovarian cancer [Global]                          | Male   | 15-19 years | 95+ years | 0.243937       | 0.361235           | 0.194685        | 0.205038            | 0.998186           | 0.992568               |
| Ovarian cancer [Data Rich]                       | Female | 15-19 years | 95+ years | 0.226764       | 0.285492           | 0.188374        | 0.21127             | 0.997751           | 0.996237               |
| Testicular cancer [Data Rich]                    | Male   | 15-19 years | 95+ years | 0.381117       | 0.471986           | 0.323002        | 0.320711            | 0.997719           | 0.996317               |
| Testicular cancer [Global]                       | Female | 15-19 years | 95+ years | 0.525666       | 0.722112           | 0.422351        | 0.422105            | 0.990543           | 0.98414                |
| Kidney cancer [Global]                           | Male   | 0-6 days    | 95+ years | 0.300379       | 0.406989           | 0.238072        | 0.253148            | 0.997757           | 0.992059               |
| Kidney cancer [Global]                           | Female | 0-6 days    | 95+ years | 0.328299       | 0.446979           | 0.261111        | 0.290105            | 0.996579           | 0.990857               |
| Kidney cancer [Data Rich]                        | Male   | 0-6 days    | 95+ years | 0.276676       | 0.380922           | 0.227006        | 0.28966             | 0.997112           | 0.99499                |
| Kidney cancer [Data Rich]                        | Female | 0-6 days    | 95+ years | 0.309256       | 0.447516           | 0.252606        | 0.355533            | 0.997241           | 0.995356               |
| Bladder cancer [Data Rich]                       | Male   | 15-19 years | 95+ years | 0.239799       | 0.284837           | 0.19645         | 0.20576             | 0.998575           | 0.997169               |
| Bladder cancer [Global]                          | Female | 15-19 years | 95+ years | 0.269314       | 0.358372           | 0.211963        | 0.20983             | 0.998839           | 0.993204               |
| Bladder cancer [Data Rich]                       | Male   | 15-19 years | 95+ years | 0.229778       | 0.280378           | 0.185987        | 0.209071            | 0.99752            | 0.996755               |
| Bladder cancer [Global]                          | Female | 15-19 years | 95+ years | 0.258096       | 0.355944           | 0.202858        | 0.210584            | 0.99803            | 0.995442               |
| Brain and nervous system cancer [Global]         | Male   | 0-6 days    | 95+ years | 0.332632       | 0.462133           | 0.230021        | 0.241633            | 0.99907            | 0.992602               |
| Brain and nervous system cancer [Global]         | Female | 0-6 days    | 95+ years | 0.325096       | 0.43377            | 0.230934        | 0.235732            | 0.998807           | 0.992496               |
| Brain and nervous system cancer [Data Rich]      | Male   | 0-6 days    | 95+ years | 0.265744       | 0.355698           | 0.204372        | 0.228645            | 0.998614           | 0.997415               |
| Brain and nervous system cancer [Data Rich]      | Female | 0-6 days    | 95+ years | 0.262951       | 0.338522           | 0.204834        | 0.240693            | 0.998401           | 0.997261               |
| Thyroid cancer [Data Rich]                       | Male   | 10-14 years | 95+ years | 0.330406       | 0.380462           | 0.275874        | 0.283426            | 0.998311           | 0.997079               |
| Thyroid cancer [Data Rich]                       | Female | 10-14 years | 95+ years | 0.427115       | 0.481681           | 0.363703        | 0.351222            | 0.994018           | 0.988884               |
| Thyroid cancer [Global]                          | Male   | 10-14 years | 95+ years | 0.359242       | 0.451883           | 0.29421         | 0.298205            | 0.99848            | 0.996373               |
| Thyroid cancer [Global]                          | Female | 10-14 years | 95+ years | 0.442504       | 0.518925           | 0.364407        | 0.349243            | 0.996555           | 0.990083               |
| Mesothelioma [Global]                            | Male   | 15-19 years | 95+ years | 0.287796       | 0.422911           | 0.196559        | 0.216447            | 0.996932           | 0.992584               |
| Mesothelioma [Data Rich]                         | Female | 15-19 years | 95+ years | 0.158399       | 0.228087           | 0.122121        | 0.161671            | 0.999909           | 0.999763               |
| Mesothelioma [Global]                            | Male   | 15-19 years | 95+ years | 0.2306         | 0.351064           | 0.165909        | 0.179591            | 0.999591           | 0.997728               |
| Mesothelioma [Data Rich]                         | Female | 15-19 years | 95+ years | 0.164132       | 0.238614           | 0.129496        | 0.192707            | 0.99993            | 0.999815               |
| Hodgkin lymphoma [Global]                        | Male   | 0-6 days    | 95+ years | 0.432186       | 0.532533           | 0.336619        | 0.332595            | 0.998669           | 0.992222               |
| Hodgkin lymphoma [Global]                        | Female | 0-6 days    | 95+ years | 0.586384       | 0.759878           | 0.403345        | 0.415901            | 0.980035           | 0.975616               |
| Hodgkin lymphoma [Data Rich]                     | Male   | 0-6 days    | 95+ years | 0.363379       | 0.452659           | 0.288967        | 0.326635            | 0.998598           | 0.997845               |
| Hodgkin lymphoma [Data Rich]                     | Female | 0-6 days    | 95+ years | 0.448253       | 0.625623           | 0.333733        | 0.368564            | 0.975462           | 0.972859               |
| Non-Hodgkin's lymphoma [Global]                  | Male   | 0-6 days    | 95+ years | 0.289992       | 0.388249           | 0.233799        | 0.229608            | 0.999432           | 0.994005               |
| Non-Hodgkin's lymphoma [Data Rich]               | Female | 0-6 days    | 95+ years | 0.262399       | 0.32811            | 0.22068         | 0.240102            | 0.99946            | 0.998616               |
| Non-Hodgkin's lymphoma [Global]                  | Male   | 0-6 days    | 95+ years | 0.275843       | 0.374793           | 0.220922        | 0.219788            | 0.99933            | 0.993387               |
| Non-Hodgkin's lymphoma [Data Rich]               | Female | 0-6 days    | 95+ years | 0.253377       | 0.322293           | 0.208579        | 0.222412            | 0.999446           | 0.998775               |
| Multiple myeloma [Global]                        | Male   | 15-19 years | 95+ years | 0.329372       | 0.409464           | 0.258656        | 0.246793            | 0.999076           | 0.994569               |
| Multiple myeloma [Data Rich]                     | Female | 15-19 years | 95+ years | 0.26819        | 0.309009           | 0.217996        | 0.220495            | 0.999477           | 0.999102               |
| Multiple myeloma [Global]                        | Male   | 15-19 years | 95+ years | 0.325529       | 0.401854           | 0.25933         | 0.249113            | 0.999256           | 0.995477               |
| Multiple myeloma [Data Rich]                     | Female | 15-19 years | 95+ years | 0.282851       | 0.330868           | 0.23246         | 0.239517            | 0.999418           | 0.998788               |
| Leukaemia [Data Rich]                            | Male   | 0-6 days    | 95+ years | 0.226176       | 0.273094           | 0.189964        | 0.209323            | 0.998006           | 0.996388               |
| Leukaemia [Data Rich]                            | Female | 0-6 days    | 95+ years | 0.220055       | 0.264433           | 0.186877        | 0.208514            | 0.997901           | 0.996165               |
| Leukaemia [Global]                               | Male   | 0-6 days    | 95+ years | 0.275716       | 0.345096           | 0.220746        | 0.219118            | 0.998972           | 0.992471               |
| Leukaemia [Global]                               | Female | 0-6 days    | 95+ years | 0.279914       | 0.344312           | 0.226929        | 0.223578            | 0.998949           | 0.993562               |
| Other malignant cancers [Global]                 | Male   | 0-6 days    | 95+ years | 0.340728       | 0.395936           | 0.284357        | 0.287672            | 0.992678           | 0.985092               |
| Other malignant cancers [Global]                 | Female | 0-6 days    | 95+ years | 0.316059       | 0.374194           | 0.257806        | 0.243822            | 0.996177           | 0.988661               |
| Other malignant cancers [Data Rich]              | Male   | 0-6 days    | 95+ years | 0.309816       | 0.356316           | 0.261083        | 0.255547            | 0.994941           | 0.98667                |
| Other malignant cancers [Data Rich]              | Female | 0-6 days    | 95+ years | 0.344036       | 0.386602           | 0.293848        | 0.276621            | 0.990704           | 0.983411               |
| Other neoplasms [Data Rich]                      | Male   | 0-6 days    | 95+ years | 0.409119       | 0.741982           | 0.180638        | 0.210759            | 0.999869           | 0.999136               |
| Other neoplasms [Global]                         | Female | 0-6 days    | 95+ years | 0.372351       | 0.594444           | 0.190011        | 0.200544            | 0.999623           | 0.989731               |
| Other neoplasms [Data Rich]                      | Male   | 0-6 days    | 95+ years | 0.382953       | 0.634151           | 0.172166        | 0.196483            | 0.999849           | 0.998571               |
| Other neoplasms [Global]                         | Female | 0-6 days    | 95+ years | 0.351331       | 0.54922            | 0.180441        | 0.18834             | 0.999646           | 0.992088               |
| Cardiovascular diseases [Data Rich]              | Male   | 0-6 days    | 95+ years | 0.178349       | 0.178349           | 0.0945685       | 0.120629            | 0.999816           | 0.999405               |
| Cardiovascular diseases [Data Rich]              | Female | 0-6 days    | 95+ years | 0.122692       | 0.176375           | 0.0941014       | 0.117502            | 0.999749           | 0.99925                |
| Cardiovascular diseases [Global]                 | Male   | 0-6 days    | 95+ years | 0.15223        | 0.239381           | 0.113276        | 0.116094            | 0.999474           | 0.987343               |
| Cardiovascular diseases [Global]                 | Female | 0-6 days    | 95+ years | 0.150868       | 0.234192           | 0.113134        | 0.115144            | 0.999549           | 0.990956               |
| Rheumatic heart disease [Data Rich]              | Male   | 1-4 years   | 95+ years | 0.170679       | 0.272756           | 0.124394        | 0.146945            | 0.999727           | 0.999011               |
| Rheumatic heart disease [Data Rich]              | Female | 1-4 years   | 95+ years | 0.149399       | 0.23885            | 0.108965        | 0.131304            | 0.999895           | 0.999412               |
| Rheumatic heart disease [Global]                 | Male   | 1-4 years   | 95+ years | 0.217427       | 0.403679           | 0.149735        | 0.151388            | 0.999289           | 0.98602                |

**Appendix Table 11. CODEm predictive validity results by cause, model type, sex, and age**

| Cause                                                     | Sex    | Age Start   | Age End   | RMSE In-Sample | RMSE Out-of-Sample | Trend In-Sample | Trend Out-of-Sample | Coverage In-Sample | Coverage Out-of-Sample |
|-----------------------------------------------------------|--------|-------------|-----------|----------------|--------------------|-----------------|---------------------|--------------------|------------------------|
| Rheumatic heart disease [Global]                          | Female | 1-4 years   | 95+ years | 0.22238        | 0.409441           | 0.154324        | 0.160302            | 0.99941            | 0.982674               |
| Ischaemic heart disease [Data Rich]                       | Female | 15-19 years | 95+ years | 0.12361        | 0.163709           | 0.0979092       | 0.115625            | 0.999703           | 0.998928               |
| Ischaemic heart disease [Data Rich]                       | Male   | 15-19 years | 95+ years | 0.120697       | 0.16435            | 0.0951577       | 0.106529            | 0.99968            | 0.998766               |
| Ischaemic heart disease [Global]                          | Male   | 15-19 years | 95+ years | 0.141557       | 0.25382            | 0.107834        | 0.10972             | 0.99951            | 0.974676               |
| Ischaemic heart disease [Global]                          | Female | 15-19 years | 95+ years | 0.145625       | 0.250394           | 0.110008        | 0.11396             | 0.999556           | 0.978876               |
| Stroke [Data Rich]                                        | Male   | 0-6 days    | 95+ years | 0.148336       | 0.209616           | 0.112673        | 0.144943            | 0.999896           | 0.999584               |
| Stroke [Data Rich]                                        | Female | 0-6 days    | 95+ years | 0.148887       | 0.214142           | 0.112644        | 0.145851            | 0.999908           | 0.999599               |
| Stroke [Global]                                           | Male   | 0-6 days    | 95+ years | 0.181756       | 0.300545           | 0.137599        | 0.142848            | 0.999579           | 0.987811               |
| Stroke [Global]                                           | Female | 0-6 days    | 95+ years | 0.180138       | 0.296602           | 0.134414        | 0.14009             | 0.999665           | 0.989278               |
| Ischaemic stroke [Global]                                 | Female | 0-6 days    | 95+ years | 0.195138       | 0.342733           | 0.127079        | 0.131813            | 0.999152           | 0.990135               |
| Ischaemic stroke [Global]                                 | Male   | 0-6 days    | 95+ years | 0.196354       | 0.334317           | 0.132709        | 0.137294            | 0.998982           | 0.990261               |
| Ischaemic stroke [Data Rich]                              | Female | 0-6 days    | 95+ years | 0.163867       | 0.281864           | 0.116413        | 0.154417            | 0.99951            | 0.999307               |
| Ischaemic stroke [Data Rich]                              | Male   | 0-6 days    | 95+ years | 0.165675       | 0.272891           | 0.118176        | 0.151207            | 0.999272           | 0.999287               |
| Intracerebral hemorrhage [Data Rich]                      | Male   | 0-6 days    | 95+ years | 0.148507       | 0.217911           | 0.107853        | 0.129319            | 0.999891           | 0.999577               |
| Intracerebral hemorrhage [Data Rich]                      | Female | 0-6 days    | 95+ years | 0.151623       | 0.234662           | 0.107246        | 0.129575            | 0.999882           | 0.999555               |
| Intracerebral hemorrhage [Global]                         | Male   | 0-6 days    | 95+ years | 0.199857       | 0.374835           | 0.146739        | 0.147729            | 0.999188           | 0.984699               |
| Intracerebral hemorrhage [Global]                         | Female | 0-6 days    | 95+ years | 0.196265       | 0.375577           | 0.138305        | 0.138105            | 0.999335           | 0.986789               |
| Subarachnoid hemorrhage [Data Rich]                       | Male   | 0-6 days    | 95+ years | 0.167265       | 0.243186           | 0.112676        | 0.133369            | 0.999894           | 0.999737               |
| Subarachnoid hemorrhage [Data Rich]                       | Female | 0-6 days    | 95+ years | 0.170615       | 0.262985           | 0.116839        | 0.133344            | 0.999378           | 0.999263               |
| Subarachnoid hemorrhage [Global]                          | Male   | 0-6 days    | 95+ years | 0.239316       | 0.355655           | 0.139574        | 0.142648            | 0.999525           | 0.992821               |
| Subarachnoid hemorrhage [Global]                          | Female | 0-6 days    | 95+ years | 0.216962       | 0.344562           | 0.139428        | 0.138288            | 0.999039           | 0.992151               |
| Hypertensive heart disease [Data Rich]                    | Female | 15-19 years | 95+ years | 0.206199       | 0.348325           | 0.124978        | 0.141274            | 0.999752           | 0.998861               |
| Hypertensive heart disease [Data Rich]                    | Male   | 15-19 years | 95+ years | 0.20023        | 0.334586           | 0.133705        | 0.153222            | 0.999597           | 0.998552               |
| Hypertensive heart disease [Global]                       | Male   | 15-19 years | 95+ years | 0.252386       | 0.55868            | 0.163631        | 0.164757            | 0.998155           | 0.95466                |
| Hypertensive heart disease [Global]                       | Female | 15-19 years | 95+ years | 0.237133       | 0.53143            | 0.151209        | 0.154134            | 0.998603           | 0.962118               |
| Cardiomyopathy and myocarditis [Global]                   | Male   | 0-6 days    | 95+ years | 0.237369       | 0.49811            | 0.162595        | 0.171556            | 0.999095           | 0.978317               |
| Cardiomyopathy and myocarditis [Global]                   | Female | 0-6 days    | 95+ years | 0.243713       | 0.502068           | 0.169316        | 0.173519            | 0.998901           | 0.979154               |
| Cardiomyopathy and myocarditis [Data Rich]                | Male   | 0-6 days    | 95+ years | 0.210807       | 0.344215           | 0.141563        | 0.159625            | 0.999487           | 0.998502               |
| Cardiomyopathy and myocarditis [Data Rich]                | Female | 0-6 days    | 95+ years | 0.204263       | 0.363359           | 0.146182        | 0.171603            | 0.999179           | 0.997914               |
| Atrial fibrillation and flutter [Global]                  | Male   | 30-34 years | 95+ years | 0.117715       | 0.235756           | 0.0534974       | 0.0549067           | 0.998318           | 0.996843               |
| Atrial fibrillation and flutter [Global]                  | Female | 30-34 years | 95+ years | 0.144624       | 0.310342           | 0.0538767       | 0.0585485           | 0.978825           | 0.977882               |
| Atrial fibrillation and flutter [Data Rich]               | Male   | 30-34 years | 95+ years | 0.112635       | 0.181005           | 0.0528332       | 0.0591712           | 0.998585           | 0.998482               |
| Atrial fibrillation and flutter [Data Rich]               | Female | 30-34 years | 95+ years | 0.109665       | 0.174814           | 0.0461898       | 0.0529231           | 0.978457           | 0.978075               |
| Aortic aneurysm [Global]                                  | Female | 15-19 years | 95+ years | 0.194615       | 0.331405           | 0.142272        | 0.146798            | 0.999585           | 0.988708               |
| Aortic aneurysm [Global]                                  | Male   | 15-19 years | 95+ years | 0.191359       | 0.308507           | 0.128166        | 0.130777            | 0.999829           | 0.991747               |
| Aortic aneurysm [Data Rich]                               | Female | 15-19 years | 95+ years | 0.170281       | 0.255515           | 0.130096        | 0.136273            | 0.99968            | 0.999309               |
| Aortic aneurysm [Data Rich]                               | Male   | 15-19 years | 95+ years | 0.153733       | 0.246939           | 0.117983        | 0.130935            | 0.999809           | 0.999492               |
| Peripheral vascular disease [Data Rich]                   | Male   | 40-44 years | 95+ years | 0.769106       | 1.15007            | 0.286739        | 0.403989            | 0.993324           | 0.990064               |
| Peripheral vascular disease [Data Rich]                   | Female | 40-44 years | 95+ years | 0.809813       | 1.15761            | 0.281005        | 0.392294            | 0.994552           | 0.990763               |
| Peripheral vascular disease [Global]                      | Male   | 40-44 years | 95+ years | 0.551411       | 0.943276           | 0.290258        | 0.323425            | 0.994095           | 0.941117               |
| Peripheral vascular disease [Global]                      | Female | 40-44 years | 95+ years | 0.494952       | 0.983661           | 0.285441        | 0.323433            | 0.992831           | 0.932564               |
| Endocarditis [Data Rich]                                  | Male   | 0-6 days    | 95+ years | 0.179328       | 0.379227           | 0.124616        | 0.157344            | 0.999989           | 0.999886               |
| Endocarditis [Data Rich]                                  | Female | 0-6 days    | 95+ years | 0.259699       | 0.412374           | 0.12804         | 0.151819            | 0.999989           | 0.999944               |
| Endocarditis [Global]                                     | Male   | 0-6 days    | 95+ years | 0.224326       | 0.437446           | 0.146524        | 0.155519            | 0.99975            | 0.993183               |
| Endocarditis [Global]                                     | Female | 0-6 days    | 95+ years | 0.223804       | 0.44441            | 0.144233        | 0.15099             | 0.99979            | 0.992725               |
| Non-rheumatic valvular heart disease [Global]             | Male   | 15-19 years | 95+ years | 0.210165       | 0.359784           | 0.147196        | 0.150648            | 0.999598           | 0.991269               |
| Non-rheumatic valvular heart disease [Data Rich]          | Female | 15-19 years | 95+ years | 0.193907       | 0.299844           | 0.131087        | 0.145706            | 0.999782           | 0.999386               |
| Non-rheumatic valvular heart disease [Data Rich]          | Male   | 15-19 years | 95+ years | 0.174143       | 0.283955           | 0.128377        | 0.153095            | 0.999787           | 0.999469               |
| Non-rheumatic valvular heart disease [Global]             | Female | 15-19 years | 95+ years | 0.212117       | 0.374866           | 0.147365        | 0.149058            | 0.999522           | 0.989548               |
| Other cardiovascular and circulatory diseases [Data Rich] | Male   | 0-6 days    | 95+ years | 0.16326        | 0.251777           | 0.120487        | 0.147465            | 0.99955            | 0.999107               |
| Other cardiovascular and circulatory diseases [Data Rich] | Female | 0-6 days    | 95+ years | 0.159457       | 0.25048            | 0.116475        | 0.142259            | 0.999521           | 0.999019               |
| Other cardiovascular and circulatory diseases [Global]    | Male   | 0-6 days    | 95+ years | 0.253541       | 0.376299           | 0.159057        | 0.157655            | 0.998085           | 0.987294               |
| Other cardiovascular and circulatory diseases [Global]    | Female | 0-6 days    | 95+ years | 0.237477       | 0.421423           | 0.152423        | 0.155502            | 0.998645           | 0.989782               |
| Chronic respiratory diseases [Data Rich]                  | Female | 1-4 years   | 95+ years | 0.1512         | 0.218832           | 0.116472        | 0.133261            | 0.999898           | 0.999252               |
| Chronic respiratory diseases [Data Rich]                  | Male   | 1-4 years   | 95+ years | 0.152456       | 0.210312           | 0.119372        | 0.137296            | 0.999832           | 0.999195               |
| Chronic respiratory diseases [Global]                     | Female | 1-4 years   | 95+ years | 0.216671       | 0.358142           | 0.151096        | 0.147905            | 0.999467           | 0.981186               |
| Chronic respiratory diseases [Global]                     | Male   | 1-4 years   | 95+ years | 0.216275       | 0.342905           | 0.150406        | 0.151497            | 0.998759           | 0.976284               |
| Chronic obstructive pulmonary disease [Data Rich]         | Male   | 1-4 years   | 95+ years | 0.171685       | 0.294069           | 0.126708        | 0.139704            | 0.99902            | 0.998652               |
| Chronic obstructive pulmonary disease [Data Rich]         | Female | 1-4 years   | 95+ years | 0.231388       | 0.482595           | 0.15847         | 0.168136            | 0.99714            | 0.997398               |
| Chronic obstructive pulmonary disease [Global]            | Male   | 1-4 years   | 95+ years | 0.202218       | 0.364528           | 0.147003        | 0.151346            | 0.998883           | 0.977102               |
| Chronic obstructive pulmonary disease [Global]            | Female | 1-4 years   | 95+ years | 0.269089       | 0.480016           | 0.184476        | 0.18303             | 0.996773           | 0.973767               |
| Pneumoconiosis [Global]                                   | Male   | 15-19 years | 95+ years | 0.349696       | 0.878663           | 0.241493        | 0.246026            | 0.99771            | 0.96192                |
| Pneumoconiosis [Data Rich]                                | Male   | 15-19 years | 95+ years | 0.286863       | 0.487386           | 0.20642         | 0.20412             | 0.998925           | 0.997469               |
| Pneumoconiosis [Global]                                   | Female | 15-19 years | 95+ years | 0.492086       | 1.04566            | 0.347884        | 0.379693            | 0.996394           | 0.960215               |
| Pneumoconiosis [Data Rich]                                | Female | 15-19 years | 95+ years | 0.410757       | 0.767512           | 0.314978        | 0.3963              | 0.997424           | 0.995513               |
| Silicosis [Global]                                        | Male   | 15-19 years | 95+ years | 0.540992       | 1.21               | 0.375578        | 0.370453            | 0.994717           | 0.931613               |
| Silicosis [Data Rich]                                     | Male   | 15-19 years | 95+ years | 0.44089        | 0.70923            | 0.333236        | 0.313649            | 0.99578            | 0.99121                |
| Silicosis [Global]                                        | Female | 15-19 years | 95+ years | 0.960732       | 1.38463            | 0.678226        | 0.724321            | 0.983468           | 0.945125               |
| Silicosis [Data Rich]                                     | Female | 15-19 years | 95+ years | 0.89582        | 1.17875            | 0.658615        | 0.890185            | 0.9861             | 0.980647               |
| Asbestosis [Data Rich]                                    | Female | 15-19 years | 95+ years | 0.772057       | 1.15268            | 0.511213        | 0.565435            | 0.989689           | 0.98115                |
| Asbestosis [Global]                                       | Female | 15-19 years | 95+ years | 0.954534       | 1.43899            | 0.555396        | 0.564581            | 0.985674           | 0.913522               |
| Asbestosis [Data Rich]                                    | Male   | 15-19 years | 95+ years | 0.553734       | 0.838778           | 0.360494        | 0.372985            | 0.994823           | 0.991278               |
| Asbestosis [Global]                                       | Male   | 15-19 years | 95+ years | 0.745996       | 1.19782            | 0.422431        | 0.427746            | 0.991105           | 0.953543               |
| Coal workers pneumoconiosis [Global]                      | Male   | 15-19 years | 95+ years | 0.58745        | 1.4102             | 0.424398        | 0.445473            | 0.988838           | 0.906634               |
| Coal workers pneumoconiosis [Data Rich]                   | Male   | 15-19 years | 95+ years | 0.487133       | 0.731989           | 0.372926        | 0.350431            | 0.991248           | 0.984835               |
| Coal workers pneumoconiosis [Global]                      | Female | 15-19 years | 95+ years | 0.923813       | 1.41196            | 0.65689         | 0.724822            | 0.988377           | 0.931433               |
| Coal workers pneumoconiosis [Data Rich]                   | Female | 15-19 years | 95+ years | 0.905259       | 1.28166            | 0.633883        | 0.850927            | 0.990533           | 0.97725                |



Appendix Table 11. CODEm predictive validity results by cause, model type, sex, and age

| Cause                                                           | Sex    | Age Start   | Age End   | RMSE In-Sample | RMSE Out-of-Sample | Trend In-Sample | Trend Out-of-Sample | Coverage In-Sample | Coverage Out-of-Sample |
|-----------------------------------------------------------------|--------|-------------|-----------|----------------|--------------------|-----------------|---------------------|--------------------|------------------------|
| Other pneumoconiosis [Global]                                   | Male   | 15-19 years | 95+ years | 0.582752       | 1.25865            | 0.430702        | 0.445134            | 0.991076           | 0.918504               |
| Other pneumoconiosis [Data Rich]                                | Male   | 15-19 years | 95+ years | 0.592423       | 0.882941           | 0.40642         | 0.481002            | 0.993057           | 0.989046               |
| Other pneumoconiosis [Global]                                   | Female | 15-19 years | 95+ years | 0.618385       | 1.33629            | 0.453066        | 0.478793            | 0.990461           | 0.920691               |
| Other pneumoconiosis [Data Rich]                                | Female | 15-19 years | 95+ years | 0.552065       | 1.13536            | 0.414437        | 0.519417            | 0.992892           | 0.987809               |
| Asthma [Data Rich]                                              | Female | 1-4 years   | 95+ years | 0.18606        | 0.353521           | 0.136668        | 0.157565            | 0.99987            | 0.999683               |
| Asthma [Data Rich]                                              | Male   | 1-4 years   | 95+ years | 0.19629        | 0.377713           | 0.144873        | 0.160265            | 0.999894           | 0.999697               |
| Asthma [Global]                                                 | Female | 1-4 years   | 95+ years | 0.218474       | 0.441317           | 0.155206        | 0.159405            | 0.999811           | 0.991995               |
| Asthma [Global]                                                 | Male   | 1-4 years   | 95+ years | 0.236011       | 0.474034           | 0.162526        | 0.166226            | 0.999697           | 0.984404               |
| Interstitial lung disease and pulmonary sarcoidosis [Global]    | Male   | 1-4 years   | 95+ years | 0.356899       | 0.628922           | 0.166521        | 0.171833            | 0.999111           | 0.979663               |
| Interstitial lung disease and pulmonary sarcoidosis [Data Rich] | Female | 1-4 years   | 95+ years | 0.282913       | 0.52771            | 0.14239         | 0.150303            | 0.999883           | 0.99907                |
| Interstitial lung disease and pulmonary sarcoidosis [Data Rich] | Male   | 1-4 years   | 95+ years | 0.392941       | 0.590629           | 0.161393        | 0.16837             | 0.999459           | 0.998339               |
| Interstitial lung disease and pulmonary sarcoidosis [Global]    | Female | 1-4 years   | 95+ years | 0.269076       | 0.57788            | 0.158843        | 0.164231            | 0.999458           | 0.983458               |
| Other chronic respiratory diseases [Global]                     | Female | 1-4 years   | 95+ years | 0.434954       | 0.721641           | 0.289182        | 0.299304            | 0.997225           | 0.980859               |
| Other chronic respiratory diseases [Global]                     | Male   | 1-4 years   | 95+ years | 0.394453       | 0.690721           | 0.265073        | 0.278988            | 0.998111           | 0.982332               |
| Other chronic respiratory diseases [Data Rich]                  | Female | 1-4 years   | 95+ years | 0.339433       | 0.673973           | 0.234583        | 0.269209            | 0.99832            | 0.995885               |
| Other chronic respiratory diseases [Data Rich]                  | Male   | 1-4 years   | 95+ years | 0.31353        | 0.628562           | 0.216427        | 0.255788            | 0.999542           | 0.99807                |
| Cirrhosis and other chronic liver diseases [Global]             | Female | 1-4 years   | 95+ years | 0.231525       | 0.396747           | 0.153042        | 0.15391             | 0.998907           | 0.981863               |
| Cirrhosis and other chronic liver diseases [Global]             | Male   | 1-4 years   | 95+ years | 0.189393       | 0.394842           | 0.138198        | 0.137572            | 0.999568           | 0.97592                |
| Cirrhosis and other chronic liver diseases [Data Rich]          | Female | 1-4 years   | 95+ years | 0.179788       | 0.290927           | 0.130723        | 0.15297             | 0.999156           | 0.998317               |
| Cirrhosis and other chronic liver diseases [Data Rich]          | Male   | 1-4 years   | 95+ years | 0.154056       | 0.247356           | 0.115719        | 0.133695            | 0.999847           | 0.999188               |
| Digestive diseases [Data Rich]                                  | Male   | 0-6 days    | 95+ years | 0.163251       | 0.244208           | 0.121126        | 0.152709            | 0.999784           | 0.998885               |
| Digestive diseases [Data Rich]                                  | Female | 0-6 days    | 95+ years | 0.163499       | 0.246814           | 0.121078        | 0.153759            | 0.999755           | 0.998839               |
| Digestive diseases [Global]                                     | Female | 0-6 days    | 95+ years | 0.209512       | 0.355858           | 0.150047        | 0.156486            | 0.99955            | 0.984391               |
| Digestive diseases [Global]                                     | Male   | 0-6 days    | 95+ years | 0.208314       | 0.358234           | 0.153626        | 0.158007            | 0.999555           | 0.982165               |
| Peptic ulcer disease [Data Rich]                                | Female | 1-4 years   | 95+ years | 0.163203       | 0.269267           | 0.116056        | 0.143406            | 0.999466           | 0.999225               |
| Peptic ulcer disease [Data Rich]                                | Male   | 1-4 years   | 95+ years | 0.152689       | 0.235635           | 0.114843        | 0.130349            | 0.999958           | 0.999693               |
| Peptic ulcer disease [Global]                                   | Male   | 1-4 years   | 95+ years | 0.231561       | 0.366453           | 0.151565        | 0.15269             | 0.998833           | 0.989286               |
| Peptic ulcer disease [Global]                                   | Female | 1-4 years   | 95+ years | 0.231963       | 0.372663           | 0.149748        | 0.147449            | 0.999269           | 0.988627               |
| Gastritis and duodenitis [Global]                               | Female | 1-4 years   | 95+ years | 0.482722       | 0.789165           | 0.273529        | 0.27127             | 0.994376           | 0.976996               |
| Gastritis and duodenitis [Global]                               | Male   | 1-4 years   | 95+ years | 0.378545       | 0.757616           | 0.255545        | 0.250057            | 0.995437           | 0.974697               |
| Gastritis and duodenitis [Data Rich]                            | Male   | 1-4 years   | 95+ years | 0.260545       | 0.564294           | 0.196314        | 0.224186            | 0.999304           | 0.998318               |
| Gastritis and duodenitis [Data Rich]                            | Female | 1-4 years   | 95+ years | 0.272732       | 0.591176           | 0.196546        | 0.216745            | 0.999046           | 0.997903               |
| Appendicitis [Data Rich]                                        | Male   | 1-4 years   | 95+ years | 0.205578       | 0.302792           | 0.159118        | 0.186569            | 0.999893           | 0.999568               |
| Appendicitis [Data Rich]                                        | Female | 1-4 years   | 95+ years | 0.207993       | 0.311588           | 0.162566        | 0.204337            | 0.99983            | 0.99961                |
| Appendicitis [Global]                                           | Female | 1-4 years   | 95+ years | 0.255621       | 0.469017           | 0.186577        | 0.19561             | 0.999366           | 0.994786               |
| Appendicitis [Global]                                           | Male   | 1-4 years   | 95+ years | 0.248714       | 0.428302           | 0.179267        | 0.184991            | 0.999718           | 0.994534               |
| Paralytic ileus and intestinal obstruction [Data Rich]          | Female | 0-6 days    | 95+ years | 0.267518       | 0.356466           | 0.145423        | 0.161106            | 0.999924           | 0.999786               |
| Paralytic ileus and intestinal obstruction [Data Rich]          | Male   | 0-6 days    | 95+ years | 0.241383       | 0.349908           | 0.14465         | 0.163289            | 0.999972           | 0.999808               |
| Paralytic ileus and intestinal obstruction [Global]             | Male   | 0-6 days    | 95+ years | 0.276575       | 0.425407           | 0.163066        | 0.164909            | 0.999609           | 0.995144               |
| Paralytic ileus and intestinal obstruction [Global]             | Female | 0-6 days    | 95+ years | 0.27013        | 0.417731           | 0.161591        | 0.165395            | 0.999661           | 0.995087               |
| Inguinal, femoral, and abdominal hernia [Global]                | Female | 1-4 years   | 95+ years | 0.315891       | 0.514891           | 0.181891        | 0.173229            | 0.997744           | 0.988161               |
| Inguinal, femoral, and abdominal hernia [Global]                | Male   | 1-4 years   | 95+ years | 0.254898       | 0.463373           | 0.160202        | 0.171067            | 0.998779           | 0.991002               |
| Inguinal, femoral, and abdominal hernia [Data Rich]             | Male   | 1-4 years   | 95+ years | 0.170747       | 0.293475           | 0.124594        | 0.141111            | 0.999927           | 0.999725               |
| Inguinal, femoral, and abdominal hernia [Data Rich]             | Female | 1-4 years   | 95+ years | 0.226708       | 0.368779           | 0.132683        | 0.148326            | 0.999881           | 0.99966                |
| Inflammatory bowel disease [Data Rich]                          | Female | 1-4 years   | 95+ years | 0.247013       | 0.411467           | 0.162744        | 0.176062            | 0.999888           | 0.998055               |
| Inflammatory bowel disease [Data Rich]                          | Male   | 1-4 years   | 95+ years | 0.241852       | 0.397231           | 0.162187        | 0.186721            | 0.999921           | 0.999016               |
| Inflammatory bowel disease [Global]                             | Female | 1-4 years   | 95+ years | 0.284343       | 0.514949           | 0.193932        | 0.200861            | 0.999175           | 0.989026               |
| Inflammatory bowel disease [Global]                             | Male   | 1-4 years   | 95+ years | 0.277262       | 0.486974           | 0.188987        | 0.196448            | 0.9993             | 0.993099               |
| Vascular intestinal disorders [Global]                          | Male   | 1-4 years   | 95+ years | 0.243676       | 0.449537           | 0.151969        | 0.158315            | 0.99927            | 0.989858               |
| Vascular intestinal disorders [Data Rich]                       | Male   | 1-4 years   | 95+ years | 0.186459       | 0.334872           | 0.133157        | 0.155961            | 0.999932           | 0.999507               |
| Vascular intestinal disorders [Global]                          | Female | 1-4 years   | 95+ years | 0.295363       | 0.52889            | 0.168842        | 0.173214            | 0.998667           | 0.986073               |
| Vascular intestinal disorders [Data Rich]                       | Female | 1-4 years   | 95+ years | 0.216193       | 0.390982           | 0.144159        | 0.166716            | 0.99962            | 0.998381               |
| Gallbladder and biliary diseases [Data Rich]                    | Female | 1-4 years   | 95+ years | 0.192297       | 0.283619           | 0.134867        | 0.15667             | 0.999717           | 0.999394               |
| Gallbladder and biliary diseases [Data Rich]                    | Male   | 1-4 years   | 95+ years | 0.169064       | 0.238025           | 0.125702        | 0.148312            | 0.99996            | 0.999775               |
| Gallbladder and biliary diseases [Global]                       | Female | 1-4 years   | 95+ years | 0.259076       | 0.443894           | 0.172675        | 0.176682            | 0.9985             | 0.989304               |
| Gallbladder and biliary diseases [Global]                       | Male   | 1-4 years   | 95+ years | 0.251965       | 0.42582            | 0.166192        | 0.174177            | 0.998619           | 0.990731               |
| Pancreatitis [Data Rich]                                        | Female | 1-4 years   | 95+ years | 0.217484       | 0.299859           | 0.143533        | 0.148019            | 0.999814           | 0.999479               |
| Pancreatitis [Data Rich]                                        | Male   | 1-4 years   | 95+ years | 0.172938       | 0.24902            | 0.130123        | 0.143909            | 0.999948           | 0.999672               |
| Pancreatitis [Global]                                           | Male   | 1-4 years   | 95+ years | 0.249493       | 0.404567           | 0.15432         | 0.157645            | 0.999584           | 0.992293               |
| Pancreatitis [Global]                                           | Female | 1-4 years   | 95+ years | 0.285583       | 0.422119           | 0.17215         | 0.167207            | 0.999236           | 0.9908                 |
| Other digestive diseases [Global]                               | Male   | 1-4 years   | 95+ years | 0.249343       | 0.45811            | 0.163893        | 0.17178             | 0.999589           | 0.99303                |
| Other digestive diseases [Global]                               | Female | 1-4 years   | 95+ years | 0.245709       | 0.44755            | 0.160235        | 0.169167            | 0.999451           | 0.992343               |
| Other digestive diseases [Data Rich]                            | Male   | 1-4 years   | 95+ years | 0.190888       | 0.303428           | 0.136358        | 0.154995            | 0.999919           | 0.999689               |
| Other digestive diseases [Data Rich]                            | Female | 1-4 years   | 95+ years | 0.177858       | 0.30002            | 0.127088        | 0.136433            | 0.99994            | 0.999653               |
| Alzheimer's disease and other dementias [Global]                | Female | 40-44 years | 95+ years | 0.0824126      | 0.154187           | 0.049327        | 0.0513536           | 0.998569           | 0.992322               |
| Alzheimer's disease and other dementias [Data Rich]             | Female | 40-44 years | 95+ years | 0.0671441      | 0.0903206          | 0.0425099       | 0.0418939           | 0.998499           | 0.997275               |
| Alzheimer's disease and other dementias [Global]                | Male   | 40-44 years | 95+ years | 0.083925       | 0.149482           | 0.0525577       | 0.0525745           | 0.999184           | 0.9959                 |
| Alzheimer's disease and other dementias [Data Rich]             | Male   | 40-44 years | 95+ years | 0.0744528      | 0.10522            | 0.0485192       | 0.0482944           | 0.999191           | 0.9984                 |
| Parkinson's disease [Global]                                    | Male   | 20-24 years | 95+ years | 0.14367        | 0.271911           | 0.0452369       | 0.0484864           | 0.999962           | 0.996322               |
| Parkinson's disease [Data Rich]                                 | Male   | 20-24 years | 95+ years | 0.113832       | 0.151608           | 0.0412618       | 0.0527286           | 0.99998            | 0.999924               |
| Parkinson's disease [Global]                                    | Female | 20-24 years | 95+ years | 0.181005       | 0.331647           | 0.0471454       | 0.0504682           | 0.999917           | 0.995636               |
| Parkinson's disease [Data Rich]                                 | Female | 20-24 years | 95+ years | 0.132517       | 0.209562           | 0.0434825       | 0.0562481           | 0.999961           | 0.990049               |
| Epilepsy [Global]                                               | Female | 28-364 days | 95+ years | 0.227143       | 0.388546           | 0.152457        | 0.162016            | 0.999913           | 0.996692               |
| Epilepsy [Data Rich]                                            | Female | 28-364 days | 95+ years | 0.185122       | 0.272202           | 0.136251        | 0.174614            | 0.999967           | 0.9998                 |
| Epilepsy [Data Rich]                                            | Male   | 28-364 days | 95+ years | 0.180612       | 0.273391           | 0.132214        | 0.168538            | 0.999933           | 0.999725               |
| Epilepsy [Global]                                               | Male   | 28-364 days | 95+ years | 0.223255       | 0.380373           | 0.148447        | 0.154738            | 0.999908           | 0.992992               |
| Multiple sclerosis [Global]                                     | Male   | 20-24 years | 95+ years | 0.270918       | 0.450186           | 0.168579        | 0.16953             | 0.998746           | 0.994678               |

**Appendix Table 11. CODEm predictive validity results by cause, model type, sex, and age**

| Cause                                             | Sex    | Age Start   | Age End     | RMSE In-Sample | RMSE Out-of-Sample | Trend In-Sample | Trend Out-of-Sample | Coverage In-Sample | Coverage Out-of-Sample |
|---------------------------------------------------|--------|-------------|-------------|----------------|--------------------|-----------------|---------------------|--------------------|------------------------|
| Multiple sclerosis [Global]                       | Female | 20-24 years | 95+ years   | 0.25685        | 0.429587           | 0.15188         | 0.161161            | 0.99977            | 0.994626               |
| Multiple sclerosis [Data Rich]                    | Male   | 20-24 years | 95+ years   | 0.238515       | 0.331821           | 0.151998        | 0.179306            | 0.999398           | 0.999148               |
| Multiple sclerosis [Data Rich]                    | Female | 20-24 years | 95+ years   | 0.225774       | 0.307576           | 0.139595        | 0.166805            | 0.999912           | 0.999976               |
| Motor neuron disease [Data Rich]                  | Male   | 0-6 days    | 95+ years   | 0.255878       | 0.519196           | 0.163763        | 0.157911            | 0.99868            | 0.996846               |
| Motor neuron disease [Data Rich]                  | Female | 0-6 days    | 95+ years   | 0.264589       | 0.5616             | 0.164106        | 0.172462            | 0.998772           | 0.995915               |
| Motor neuron disease [Global]                     | Female | 0-6 days    | 95+ years   | 0.35521        | 0.696353           | 0.203344        | 0.213445            | 0.996735           | 0.983567               |
| Motor neuron disease [Global]                     | Male   | 0-6 days    | 95+ years   | 0.34129        | 0.667639           | 0.198505        | 0.197411            | 0.997173           | 0.983218               |
| Other neurological disorders [Data Rich]          | Male   | 28-364 days | 95+ years   | 0.192445       | 0.322054           | 0.141295        | 0.164227            | 0.999947           | 0.999803               |
| Other neurological disorders [Global]             | Male   | 28-364 days | 95+ years   | 0.225889       | 0.362046           | 0.157787        | 0.161598            | 0.99986            | 0.997321               |
| Other neurological disorders [Data Rich]          | Female | 28-364 days | 95+ years   | 0.200637       | 0.32034            | 0.146496        | 0.166174            | 0.999943           | 0.999741               |
| Other neurological disorders [Global]             | Female | 28-364 days | 95+ years   | 0.236489       | 0.39569            | 0.167629        | 0.170331            | 0.99978            | 0.99661                |
| Alcohol use disorders [Global]                    | Male   | 15-19 years | 95+ years   | 0.268367       | 0.606702           | 0.167065        | 0.177932            | 0.998843           | 0.975192               |
| Alcohol use disorders [Global]                    | Female | 15-19 years | 95+ years   | 0.277387       | 0.668505           | 0.18401         | 0.202745            | 0.999424           | 0.980833               |
| Alcohol use disorders [Data Rich]                 | Male   | 15-19 years | 95+ years   | 0.196277       | 0.321276           | 0.139928        | 0.161816            | 0.99934            | 0.997527               |
| Alcohol use disorders [Data Rich]                 | Female | 15-19 years | 95+ years   | 0.232468       | 0.342008           | 0.161182        | 0.205374            | 0.999749           | 0.999029               |
| Drug use disorders [Global]                       | Female | 15-19 years | 95+ years   | 0.254691       | 0.572977           | 0.180508        | 0.198552            | 0.996652           | 0.986896               |
| Drug use disorders [Data Rich]                    | Female | 15-19 years | 95+ years   | 0.219295       | 0.363798           | 0.154069        | 0.189627            | 0.9998             | 0.999661               |
| Drug use disorders [Data Rich]                    | Male   | 15-19 years | 95+ years   | 0.224333       | 0.405228           | 0.150863        | 0.19133             | 0.99966            | 0.999315               |
| Drug use disorders [Global]                       | Male   | 15-19 years | 95+ years   | 0.252889       | 0.626894           | 0.170952        | 0.18974             | 0.999486           | 0.981237               |
| Opioid use disorders [Global]                     | Female | 15-19 years | 95+ years   | 0.251503       | 0.615283           | 0.169314        | 0.187659            | 0.999826           | 0.987653               |
| Opioid use disorders [Global]                     | Male   | 15-19 years | 95+ years   | 0.253126       | 0.728329           | 0.158024        | 0.184223            | 0.999828           | 0.979697               |
| Opioid use disorders [Data Rich]                  | Female | 15-19 years | 95+ years   | 0.182073       | 0.558608           | 0.124259        | 0.203158            | 0.999992           | 0.999873               |
| Opioid use disorders [Data Rich]                  | Male   | 15-19 years | 95+ years   | 0.253809       | 0.704751           | 0.154494        | 0.205837            | 0.999857           | 0.999685               |
| Cocaine use disorders [Global]                    | Male   | 15-19 years | 95+ years   | 0.461193       | 0.9256             | 0.283324        | 0.314581            | 0.997044           | 0.979632               |
| Cocaine use disorders [Global]                    | Female | 15-19 years | 95+ years   | 0.496263       | 0.933433           | 0.341168        | 0.369466            | 0.994403           | 0.976314               |
| Cocaine use disorders [Data Rich]                 | Male   | 15-19 years | 95+ years   | 0.368008       | 0.767307           | 0.251812        | 0.367575            | 0.997065           | 0.994899               |
| Cocaine use disorders [Data Rich]                 | Female | 15-19 years | 95+ years   | 0.404696       | 0.773992           | 0.310861        | 0.418479            | 0.995191           | 0.991587               |
| Amphetamine use disorders [Data Rich]             | Female | 15-19 years | 95+ years   | 0.348269       | 0.73458            | 0.252893        | 0.320383            | 0.997935           | 0.996201               |
| Amphetamine use disorders [Data Rich]             | Male   | 15-19 years | 95+ years   | 0.338669       | 0.932619           | 0.223413        | 0.325394            | 0.998292           | 0.99669                |
| Amphetamine use disorders [Global]                | Male   | 15-19 years | 95+ years   | 0.451214       | 0.885848           | 0.253848        | 0.27823             | 0.997838           | 0.979721               |
| Amphetamine use disorders [Global]                | Female | 15-19 years | 95+ years   | 0.503445       | 0.866394           | 0.287297        | 0.311749            | 0.997072           | 0.981565               |
| Other drug use disorders [Global]                 | Female | 15-19 years | 95+ years   | 0.294323       | 0.599496           | 0.188813        | 0.202052            | 0.999481           | 0.987284               |
| Other drug use disorders [Global]                 | Male   | 15-19 years | 95+ years   | 0.317879       | 0.663066           | 0.192554        | 0.20575             | 0.999154           | 0.984203               |
| Other drug use disorders [Data Rich]              | Female | 15-19 years | 95+ years   | 0.233985       | 0.486123           | 0.164711        | 0.208931            | 0.999808           | 0.999527               |
| Other drug use disorders [Data Rich]              | Male   | 15-19 years | 95+ years   | 0.249614       | 0.531144           | 0.171966        | 0.221162            | 0.999453           | 0.998699               |
| Eating disorders [Data Rich]                      | Female | 5-9 years   | 45-49 years | 0.628086       | 1.02235            | 0.527142        | 0.573609            | 0.984364           | 0.959704               |
| Eating disorders [Global]                         | Male   | 5-9 years   | 45-49 years | 1.20537        | 2.46081            | 0.987638        | 1.03394             | 0.929083           | 0.824744               |
| Eating disorders [Global]                         | Female | 5-9 years   | 45-49 years | 0.702613       | 1.10697            | 0.593194        | 0.580595            | 0.982105           | 0.953039               |
| Eating disorders [Data Rich]                      | Male   | 5-9 years   | 45-49 years | 1.12352        | 2.26344            | 0.931131        | 1.05571             | 0.917671           | 0.798538               |
| Anorexia nervosa [Data Rich]                      | Female | 5-9 years   | 45-49 years | 0.678923       | 1.17738            | 0.574695        | 0.636377            | 0.98201            | 0.949303               |
| Anorexia nervosa [Data Rich]                      | Male   | 5-9 years   | 45-49 years | 1.14443        | 2.42171            | 0.952038        | 1.10464             | 0.904973           | 0.754063               |
| Anorexia nervosa [Global]                         | Male   | 5-9 years   | 45-49 years | 1.23193        | 2.44928            | 1.01112         | 1.0319              | 0.915155           | 0.79143                |
| Anorexia nervosa [Global]                         | Female | 5-9 years   | 45-49 years | 0.755156       | 1.18104            | 0.645483        | 0.647946            | 0.979592           | 0.936162               |
| Bulimia nervosa [Global]                          | Male   | 5-9 years   | 45-49 years | 0.924185       | 1.37277            | 0.440549        | 0.172838            | 0.34599            | 0.346069               |
| Bulimia nervosa [Global]                          | Female | 5-9 years   | 45-49 years | 1.21009        | 1.68571            | 0.811947        | 0.797421            | 0.666522           | 0.649963               |
| Bulimia nervosa [Data Rich]                       | Female | 5-9 years   | 45-49 years | 1.09729        | 1.5011             | 0.795976        | 0.941097            | 0.897883           | 0.89274                |
| Bulimia nervosa [Data Rich]                       | Male   | 5-9 years   | 45-49 years | 0.537148       | 0.930681           | 0.429534        | 0.178214            | 0.546276           | 0.56068                |
| Diabetes mellitus [Global]                        | Female | 0-6 days    | 10-14 years | 0.31682        | 0.483883           | 0.135579        | 0.138925            | 0.999247           | 0.99717                |
| Diabetes mellitus [Data Rich]                     | Male   | 0-6 days    | 10-14 years | 0.207593       | 0.287482           | 0.102432        | 0.123916            | 1                  | 1                      |
| Diabetes mellitus [Global]                        | Male   | 0-6 days    | 10-14 years | 0.274543       | 0.461701           | 0.11244         | 0.11592             | 0.999935           | 0.99825                |
| Diabetes mellitus [Data Rich]                     | Female | 0-6 days    | 10-14 years | 0.215181       | 0.334198           | 0.11502         | 0.138982            | 0.999562           | 0.998927               |
| Diabetes mellitus [Global]                        | Female | 15-19 years | 95+ years   | 0.201688       | 0.359959           | 0.141656        | 0.149482            | 0.998529           | 0.978835               |
| Diabetes mellitus [Data Rich]                     | Female | 15-19 years | 95+ years   | 0.176722       | 0.277558           | 0.126881        | 0.160168            | 0.998508           | 0.99653                |
| Diabetes mellitus [Data Rich]                     | Male   | 15-19 years | 95+ years   | 0.17366        | 0.253404           | 0.129126        | 0.166606            | 0.999172           | 0.997507               |
| Diabetes mellitus [Global]                        | Male   | 15-19 years | 95+ years   | 0.19767        | 0.350674           | 0.143868        | 0.152711            | 0.999162           | 0.981097               |
| Acute glomerulonephritis [Data Rich]              | Female | 28-364 days | 95+ years   | 0.600207       | 0.907219           | 0.453988        | 0.479593            | 0.983657           | 0.977222               |
| Acute glomerulonephritis [Data Rich]              | Male   | 28-364 days | 95+ years   | 0.719717       | 1.03589            | 0.548993        | 0.539094            | 0.965993           | 0.955102               |
| Acute glomerulonephritis [Global]                 | Female | 28-364 days | 95+ years   | 0.727618       | 1.36574            | 0.51219         | 0.516061            | 0.978758           | 0.93365                |
| Acute glomerulonephritis [Global]                 | Male   | 28-364 days | 95+ years   | 0.799467       | 1.55201            | 0.582189        | 0.595476            | 0.964825           | 0.86979                |
| Chronic kidney disease [Data Rich]                | Male   | 28-364 days | 95+ years   | 0.168566       | 0.244936           | 0.129766        | 0.153726            | 0.999869           | 0.999446               |
| Chronic kidney disease [Data Rich]                | Female | 28-364 days | 95+ years   | 0.170266       | 0.259464           | 0.128049        | 0.147948            | 0.999759           | 0.999259               |
| Chronic kidney disease [Global]                   | Male   | 28-364 days | 95+ years   | 0.197526       | 0.342856           | 0.14174         | 0.146724            | 0.999799           | 0.987531               |
| Chronic kidney disease [Global]                   | Female | 28-364 days | 95+ years   | 0.19413        | 0.353932           | 0.142152        | 0.14569             | 0.999587           | 0.989621               |
| Urinary diseases and male infertility [Data Rich] | Female | 0-6 days    | 95+ years   | 0.174941       | 0.2674             | 0.120956        | 0.13395             | 0.999526           | 0.998728               |
| Urinary diseases and male infertility [Global]    | Female | 0-6 days    | 95+ years   | 0.287462       | 0.508534           | 0.189472        | 0.192667            | 0.996803           | 0.982452               |
| Urinary diseases and male infertility [Global]    | Male   | 0-6 days    | 95+ years   | 0.30285        | 0.49309            | 0.204017        | 0.19846             | 0.996258           | 0.984374               |
| Urinary diseases and male infertility [Data Rich] | Male   | 0-6 days    | 95+ years   | 0.179876       | 0.260628           | 0.12861         | 0.142793            | 0.999624           | 0.998882               |
| Urinary tract infections [Global]                 | Male   | 0-6 days    | 95+ years   | 0.350166       | 0.557552           | 0.188888        | 0.191552            | 0.998662           | 0.985647               |
| Urinary tract infections [Data Rich]              | Female | 0-6 days    | 95+ years   | 0.291342       | 0.426998           | 0.134986        | 0.153421            | 0.999774           | 0.99921                |
| Urinary tract infections [Global]                 | Female | 0-6 days    | 95+ years   | 0.327683       | 0.524443           | 0.168604        | 0.170113            | 0.99937            | 0.988627               |
| Urinary tract infections [Data Rich]              | Male   | 0-6 days    | 95+ years   | 0.334237       | 0.477005           | 0.144277        | 0.16278             | 0.999432           | 0.998912               |
| Urolithiasis [Global]                             | Female | 5-9 years   | 95+ years   | 0.381017       | 0.718165           | 0.248015        | 0.242039            | 0.995382           | 0.977628               |
| Urolithiasis [Data Rich]                          | Female | 5-9 years   | 95+ years   | 0.262905       | 0.412775           | 0.194587        | 0.213463            | 0.998555           | 0.997319               |
| Urolithiasis [Global]                             | Male   | 5-9 years   | 95+ years   | 0.459024       | 0.817927           | 0.288235        | 0.290452            | 0.991246           | 0.973955               |
| Urolithiasis [Data Rich]                          | Male   | 5-9 years   | 95+ years   | 0.294543       | 0.446144           | 0.22309         | 0.221486            | 0.996739           | 0.994922               |
| Other urinary diseases [Data Rich]                | Female | 0-6 days    | 95+ years   | 0.491146       | 0.857989           | 0.25058         | 0.264671            | 0.977379           | 0.974742               |
| Other urinary diseases [Data Rich]                | Male   | 0-6 days    | 95+ years   | 0.313495       | 0.553332           | 0.170075        | 0.205842            | 0.993418           | 0.992843               |
| Other urinary diseases [Global]                   | Male   | 0-6 days    | 95+ years   | 0.339457       | 0.624515           | 0.199338        | 0.215097            | 0.988619           | 0.97704                |
| Other urinary diseases [Global]                   | Female | 0-6 days    | 95+ years   | 0.550213       | 0.886574           | 0.296732        | 0.313528            | 0.971001           | 0.955904               |

Appendix Table 11. CODEm predictive validity results by cause, model type, sex, and age

| Cause                                                         | Sex    | Age Start   | Age End     | RMSE In-Sample | RMSE Out-of-Sample | Trend In-Sample | Trend Out-of-Sample | Coverage In-Sample | Coverage Out-of-Sample |
|---------------------------------------------------------------|--------|-------------|-------------|----------------|--------------------|-----------------|---------------------|--------------------|------------------------|
| Gynecological diseases [Data Rich]                            | Female | 15-19 years | 95+ years   | 0.262689       | 0.355005           | 0.203903        | 0.22348             | 0.999103           | 0.998094               |
| Gynecological diseases [Global]                               | Female | 15-19 years | 95+ years   | 0.324074       | 0.543563           | 0.234585        | 0.245764            | 0.998364           | 0.989821               |
| Uterine fibroids [Global]                                     | Female | 15-19 years | 95+ years   | 0.750084       | 1.52496            | 0.553077        | 0.568227            | 0.955657           | 0.893661               |
| Uterine fibroids [Data Rich]                                  | Female | 15-19 years | 95+ years   | 0.770535       | 1.14125            | 0.504207        | 0.521055            | 0.792634           | 0.790389               |
| Polycystic ovarian syndrome [Global]                          | Female | 15-19 years | 50-54 years | 1.76328        | 2.28273            | 1.43474         | 1.54587             | 0.953031           | 0.883378               |
| Polycystic ovarian syndrome [Data Rich]                       | Female | 15-19 years | 50-54 years | 1.60978        | 2.0965             | 1.34789         | 1.39102             | 0.951448           | 0.882389               |
| Endometriosis [Global]                                        | Female | 15-19 years | 50-54 years | 1.42057        | 2.26789            | 1.14086         | 1.15819             | 0.866377           | 0.821583               |
| Endometriosis [Data Rich]                                     | Female | 15-19 years | 50-54 years | 1.25655        | 1.89477            | 1.06938         | 1.07593             | 0.862966           | 0.836924               |
| Genital prolapse [Data Rich]                                  | Female | 15-19 years | 95+ years   | 0.663365       | 1.01817            | 0.518005        | 0.518428            | 0.948378           | 0.941102               |
| Genital prolapse [Global]                                     | Female | 15-19 years | 95+ years   | 0.774658       | 1.44693            | 0.586667        | 0.541423            | 0.944304           | 0.881971               |
| Other gynecological diseases [Data Rich]                      | Female | 15-19 years | 95+ years   | 0.460777       | 0.664376           | 0.378385        | 0.426878            | 0.993784           | 0.98855                |
| Other gynecological diseases [Global]                         | Female | 15-19 years | 95+ years   | 0.574483       | 0.902036           | 0.417936        | 0.429832            | 0.989959           | 0.96389                |
| Hemoglobinopathies and hemolytic anaemias [Global]            | Male   | 0-6 days    | 95+ years   | 0.218224       | 0.391174           | 0.145431        | 0.14623             | 0.999859           | 0.995407               |
| Hemoglobinopathies and hemolytic anaemias [Data Rich]         | Male   | 0-6 days    | 95+ years   | 0.178877       | 0.296519           | 0.122855        | 0.146973            | 0.999992           | 0.999972               |
| Hemoglobinopathies and hemolytic anaemias [Global]            | Female | 0-6 days    | 95+ years   | 0.224178       | 0.341478           | 0.141156        | 0.141804            | 0.999847           | 0.996517               |
| Hemoglobinopathies and hemolytic anaemias [Data Rich]         | Female | 0-6 days    | 95+ years   | 0.262279       | 0.345381           | 0.128392        | 0.150073            | 1                  | 0.999963               |
| Endocrine, metabolic, blood, and immune disorders [Global]    | Male   | 0-6 days    | 95+ years   | 0.275706       | 0.455715           | 0.171673        | 0.180743            | 0.99953            | 0.990643               |
| Endocrine, metabolic, blood, and immune disorders [Data Rich] | Female | 0-6 days    | 95+ years   | 0.259754       | 0.350436           | 0.149988        | 0.182027            | 0.999892           | 0.99958                |
| Endocrine, metabolic, blood, and immune disorders [Data Rich] | Male   | 0-6 days    | 95+ years   | 0.207075       | 0.302887           | 0.142384        | 0.178062            | 0.99982            | 0.999499               |
| Endocrine, metabolic, blood, and immune disorders [Global]    | Female | 0-6 days    | 95+ years   | 0.27696        | 0.450187           | 0.172792        | 0.179009            | 0.999623           | 0.992295               |
| Musculoskeletal disorders [Data Rich]                         | Female | 5-9 years   | 95+ years   | 0.185029       | 0.327961           | 0.136132        | 0.158584            | 0.999592           | 0.998988               |
| Musculoskeletal disorders [Global]                            | Female | 5-9 years   | 95+ years   | 0.231601       | 0.40352            | 0.154954        | 0.156965            | 0.999627           | 0.99039                |
| Musculoskeletal disorders [Data Rich]                         | Male   | 5-9 years   | 95+ years   | 0.182359       | 0.295164           | 0.138686        | 0.164394            | 0.999883           | 0.999645               |
| Musculoskeletal disorders [Global]                            | Male   | 5-9 years   | 95+ years   | 0.229832       | 0.380012           | 0.162361        | 0.169575            | 0.999861           | 0.994603               |
| Rheumatoid arthritis [Global]                                 | Male   | 5-9 years   | 95+ years   | 0.308645       | 0.595709           | 0.205147        | 0.212924            | 0.977889           | 0.973285               |
| Rheumatoid arthritis [Data Rich]                              | Male   | 5-9 years   | 95+ years   | 0.251451       | 0.409403           | 0.172086        | 0.1926              | 0.984204           | 0.984164               |
| Rheumatoid arthritis [Global]                                 | Female | 5-9 years   | 95+ years   | 0.26215        | 0.534096           | 0.170461        | 0.179448            | 0.991968           | 0.980761               |
| Rheumatoid arthritis [Data Rich]                              | Female | 5-9 years   | 95+ years   | 0.204943       | 0.380136           | 0.140368        | 0.167932            | 0.994884           | 0.994952               |
| Other musculoskeletal disorders [Global]                      | Male   | 5-9 years   | 95+ years   | 0.260383       | 0.416047           | 0.170187        | 0.17754             | 0.999901           | 0.998043               |
| Other musculoskeletal disorders [Global]                      | Female | 5-9 years   | 95+ years   | 0.25921        | 0.47245            | 0.164736        | 0.170667            | 0.999764           | 0.994385               |
| Other musculoskeletal disorders [Data Rich]                   | Male   | 5-9 years   | 95+ years   | 0.200109       | 0.350814           | 0.147719        | 0.170162            | 0.999956           | 0.999899               |
| Other musculoskeletal disorders [Data Rich]                   | Female | 5-9 years   | 95+ years   | 0.217306       | 0.467335           | 0.149141        | 0.180639            | 0.999822           | 0.999531               |
| Congenital anomalies [Data Rich]                              | Female | 0-6 days    | 65-69 years | 0.185842       | 0.255102           | 0.12572         | 0.139734            | 0.999973           | 0.999842               |
| Congenital anomalies [Global]                                 | Female | 0-6 days    | 65-69 years | 0.183191       | 0.300067           | 0.139225        | 0.144107            | 0.999854           | 0.994664               |
| Congenital anomalies [Global]                                 | Male   | 0-6 days    | 65-69 years | 0.185819       | 0.317779           | 0.137901        | 0.141935            | 0.999773           | 0.991951               |
| Congenital anomalies [Data Rich]                              | Male   | 0-6 days    | 65-69 years | 0.176261       | 0.274037           | 0.123578        | 0.139727            | 0.999912           | 0.99976                |
| Neural tube defects [Global]                                  | Female | 0-6 days    | 65-69 years | 0.55632        | 0.997837           | 0.355408        | 0.350579            | 0.939953           | 0.932829               |
| Neural tube defects [Data Rich]                               | Female | 0-6 days    | 65-69 years | 0.462263       | 0.761504           | 0.325699        | 0.356066            | 0.940783           | 0.934598               |
| Neural tube defects [Data Rich]                               | Male   | 0-6 days    | 65-69 years | 0.458628       | 0.751686           | 0.321512        | 0.311972            | 0.940743           | 0.935361               |
| Neural tube defects [Global]                                  | Male   | 0-6 days    | 65-69 years | 0.546394       | 1.00603            | 0.348636        | 0.370966            | 0.94338            | 0.936014               |
| Congenital heart anomalies [Global]                           | Male   | 0-6 days    | 65-69 years | 0.248971       | 0.370951           | 0.150178        | 0.152464            | 0.999918           | 0.997875               |
| Congenital heart anomalies [Data Rich]                        | Male   | 0-6 days    | 65-69 years | 0.200382       | 0.309011           | 0.134778        | 0.149715            | 0.999981           | 0.999907               |
| Congenital heart anomalies [Data Rich]                        | Female | 0-6 days    | 65-69 years | 0.196507       | 0.291116           | 0.138052        | 0.155842            | 0.999985           | 0.999919               |
| Congenital heart anomalies [Global]                           | Female | 0-6 days    | 65-69 years | 0.228811       | 0.341442           | 0.154248        | 0.157003            | 0.999927           | 0.997992               |
| Orofacial clefts [Global]                                     | Male   | 0-6 days    | 1-4 years   | 1.15112        | 1.81861            | 0.939337        | 0.991947            | 0.953364           | 0.908206               |
| Orofacial clefts [Data Rich]                                  | Male   | 0-6 days    | 1-4 years   | 1.08295        | 1.5422             | 0.905328        | 0.92447             | 0.926939           | 0.901128               |
| Orofacial clefts [Data Rich]                                  | Female | 0-6 days    | 1-4 years   | 1.17383        | 1.80555            | 0.98387         | 1.01166             | 0.918607           | 0.89537                |
| Orofacial clefts [Global]                                     | Female | 0-6 days    | 1-4 years   | 1.24811        | 2.01983            | 1.01651         | 1.0409              | 0.855253           | 0.837051               |
| Down's syndrome [Global]                                      | Male   | 0-6 days    | 65-69 years | 0.337341       | 0.68915            | 0.234972        | 0.248503            | 0.998839           | 0.990776               |
| Down's syndrome [Data Rich]                                   | Male   | 0-6 days    | 65-69 years | 0.327457       | 0.684412           | 0.217676        | 0.270993            | 0.999204           | 0.99877                |
| Down's syndrome [Global]                                      | Female | 0-6 days    | 65-69 years | 0.347549       | 0.71495            | 0.235349        | 0.243294            | 0.998912           | 0.989033               |
| Down's syndrome [Data Rich]                                   | Female | 0-6 days    | 65-69 years | 0.310385       | 0.653991           | 0.207978        | 0.246922            | 0.99865            | 0.998327               |
| Other chromosomal abnormalities [Global]                      | Female | 0-6 days    | 65-69 years | 0.386405       | 0.656402           | 0.215259        | 0.223501            | 0.999162           | 0.991326               |
| Other chromosomal abnormalities [Data Rich]                   | Female | 0-6 days    | 65-69 years | 0.352732       | 0.537989           | 0.197882        | 0.237897            | 0.99969            | 0.999312               |
| Other chromosomal abnormalities [Data Rich]                   | Male   | 0-6 days    | 65-69 years | 0.375785       | 0.634624           | 0.231657        | 0.291484            | 0.999174           | 0.998604               |
| Other chromosomal abnormalities [Global]                      | Male   | 0-6 days    | 65-69 years | 0.41842        | 0.702592           | 0.257726        | 0.266351            | 0.998231           | 0.989588               |
| Congenital musculoskeletal and limb anomalies [Data Rich]     | Male   | 0-6 days    | 65-69 years | 0.337041       | 0.484495           | 0.265583        | 0.250418            | 0.997606           | 0.995264               |
| Congenital musculoskeletal and limb anomalies [Data Rich]     | Female | 0-6 days    | 65-69 years | 0.389786       | 0.463023           | 0.274152        | 0.245011            | 0.99772            | 0.996495               |
| Congenital musculoskeletal and limb anomalies [Global]        | Male   | 0-6 days    | 65-69 years | 0.37814        | 0.643701           | 0.285774        | 0.290022            | 0.996838           | 0.985643               |
| Congenital musculoskeletal and limb anomalies [Global]        | Female | 0-6 days    | 65-69 years | 0.398196       | 0.618242           | 0.295515        | 0.288451            | 0.997027           | 0.987669               |
| Urogenital congenital anomalies [Global]                      | Female | 0-6 days    | 65-69 years | 0.486459       | 0.815562           | 0.368851        | 0.436097            | 0.959512           | 0.939634               |
| Urogenital congenital anomalies [Data Rich]                   | Female | 0-6 days    | 65-69 years | 0.496584       | 0.842142           | 0.345025        | 0.62479             | 0.952455           | 0.956303               |
| Urogenital congenital anomalies [Global]                      | Male   | 0-6 days    | 65-69 years | 0.391553       | 0.737784           | 0.29989         | 0.323199            | 0.988672           | 0.97474                |
| Urogenital congenital anomalies [Data Rich]                   | Male   | 0-6 days    | 65-69 years | 0.412589       | 0.836914           | 0.253477        | 0.409521            | 0.988522           | 0.990196               |
| Digestive congenital anomalies [Global]                       | Female | 0-6 days    | 65-69 years | 0.303424       | 0.540188           | 0.188511        | 0.191675            | 0.999222           | 0.988262               |
| Digestive congenital anomalies [Global]                       | Male   | 0-6 days    | 65-69 years | 0.295451       | 0.50542            | 0.193609        | 0.187044            | 0.998968           | 0.989486               |
| Digestive congenital anomalies [Data Rich]                    | Male   | 0-6 days    | 65-69 years | 0.253506       | 0.404805           | 0.174919        | 0.181297            | 0.994055           | 0.993332               |
| Digestive congenital anomalies [Data Rich]                    | Female | 0-6 days    | 65-69 years | 0.268607       | 0.426571           | 0.173275        | 0.186634            | 0.989679           | 0.98868                |
| Other congenital anomalies [Global]                           | Male   | 0-6 days    | 65-69 years | 0.264244       | 0.430548           | 0.183293        | 0.191168            | 0.999919           | 0.996721               |
| Other congenital anomalies [Data Rich]                        | Male   | 0-6 days    | 65-69 years | 0.24358        | 0.368098           | 0.172           | 0.204329            | 0.999985           | 0.999916               |
| Other congenital anomalies [Data Rich]                        | Female | 0-6 days    | 65-69 years | 0.255228       | 0.363258           | 0.174427        | 0.191613            | 0.999988           | 0.998882               |
| Other congenital anomalies [Global]                           | Female | 0-6 days    | 65-69 years | 0.261891       | 0.409551           | 0.183296        | 0.189435            | 0.999859           | 0.997121               |
| Skin and subcutaneous diseases [Data Rich]                    | Female | 28-364 days | 95+ years   | 0.303777       | 0.430114           | 0.145315        | 0.169153            | 0.998022           | 0.997824               |
| Skin and subcutaneous diseases [Data Rich]                    | Male   | 28-364 days | 95+ years   | 0.307026       | 0.42737            | 0.148586        | 0.172426            | 0.999275           | 0.999039               |

**Appendix Table 11. CODEm predictive validity results by cause, model type, sex, and age**

| Cause                                            | Sex    | Age Start   | Age End     | RMSE In-Sample | RMSE Out-of-Sample | Trend In-Sample | Trend Out-of-Sample | Coverage In-Sample | Coverage Out-of-Sample |
|--------------------------------------------------|--------|-------------|-------------|----------------|--------------------|-----------------|---------------------|--------------------|------------------------|
| Skin and subcutaneous diseases [Global]          | Male   | 28-364 days | 95+ years   | 0.359298       | 0.618359           | 0.181341        | 0.18834             | 0.998542           | 0.986847               |
| Skin and subcutaneous diseases [Global]          | Female | 28-364 days | 95+ years   | 0.400969       | 0.617913           | 0.18493         | 0.191139            | 0.996836           | 0.978163               |
| Cellulitis [Data Rich]                           | Female | 28-364 days | 95+ years   | 0.553883       | 0.869497           | 0.20365         | 0.233567            | 0.958627           | 0.959367               |
| Cellulitis [Global]                              | Female | 28-364 days | 95+ years   | 0.584994       | 0.889805           | 0.228315        | 0.229837            | 0.947984           | 0.935962               |
| Cellulitis [Data Rich]                           | Male   | 28-364 days | 95+ years   | 0.553257       | 0.931878           | 0.244866        | 0.324277            | 0.955442           | 0.957277               |
| Cellulitis [Global]                              | Male   | 28-364 days | 95+ years   | 0.607144       | 0.942128           | 0.260444        | 0.289412            | 0.950385           | 0.940377               |
| Pyoderma [Data Rich]                             | Male   | 0-6 days    | 95+ years   | 0.354585       | 0.66813            | 0.153784        | 0.184878            | 0.994912           | 0.978833               |
| Pyoderma [Data Rich]                             | Female | 0-6 days    | 95+ years   | 0.371988       | 0.770743           | 0.15795         | 0.19761             | 0.992348           | 0.974375               |
| Pyoderma [Global]                                | Female | 0-6 days    | 95+ years   | 0.42796        | 0.702755           | 0.186118        | 0.197221            | 0.987069           | 0.973718               |
| Pyoderma [Global]                                | Male   | 0-6 days    | 95+ years   | 0.407095       | 0.653946           | 0.17715         | 0.184715            | 0.99325            | 0.979877               |
| Decubitus ulcer [Data Rich]                      | Male   | 1-4 years   | 95+ years   | 0.70413        | 0.914402           | 0.212177        | 0.205712            | 0.854851           | 0.859582               |
| Decubitus ulcer [Global]                         | Male   | 1-4 years   | 95+ years   | 0.453065       | 1.03401            | 0.286105        | 0.281278            | 0.850518           | 0.833481               |
| Decubitus ulcer [Data Rich]                      | Female | 1-4 years   | 95+ years   | 0.331472       | 0.77589            | 0.224146        | 0.220018            | 0.820257           | 0.82979                |
| Decubitus ulcer [Global]                         | Female | 1-4 years   | 95+ years   | 0.504483       | 1.22434            | 0.287649        | 0.284677            | 0.817437           | 0.787137               |
| Other skin and subcutaneous diseases [Global]    | Male   | 28-364 days | 95+ years   | 0.52847        | 0.973955           | 0.374498        | 0.376733            | 0.916206           | 0.912887               |
| Other skin and subcutaneous diseases [Data Rich] | Male   | 28-364 days | 95+ years   | 0.465736       | 0.613763           | 0.314435        | 0.329068            | 0.932469           | 0.931473               |
| Other skin and subcutaneous diseases [Data Rich] | Female | 28-364 days | 95+ years   | 0.587247       | 0.651318           | 0.294067        | 0.273285            | 0.962743           | 0.961405               |
| Other skin and subcutaneous diseases [Global]    | Female | 28-364 days | 95+ years   | 0.530519       | 0.872552           | 0.333544        | 0.334503            | 0.943843           | 0.9442                 |
| Sudden infant death syndrome [Data Rich]         | Female | 7-27 days   | 28-364 days | 0.313267       | 0.637174           | 0.191435        | 0.216298            | 0.999472           | 0.984435               |
| Sudden infant death syndrome [Global]            | Female | 7-27 days   | 28-364 days | 0.323915       | 0.633257           | 0.200808        | 0.211619            | 0.9994             | 0.978195               |
| Sudden infant death syndrome [Data Rich]         | Male   | 7-27 days   | 28-364 days | 0.277743       | 0.627372           | 0.177025        | 0.216722            | 0.999515           | 0.977244               |
| Sudden infant death syndrome [Global]            | Male   | 7-27 days   | 28-364 days | 0.310845       | 0.618176           | 0.1907          | 0.204784            | 0.999294           | 0.970522               |
| Transport injuries [Global]                      | Male   | 0-6 days    | 95+ years   | 0.209561       | 0.327954           | 0.166036        | 0.158134            | 0.999347           | 0.99108                |
| Transport injuries [Global]                      | Female | 0-6 days    | 95+ years   | 0.216405       | 0.338398           | 0.166661        | 0.165719            | 0.99951            | 0.992996               |
| Transport injuries [Data Rich]                   | Female | 0-6 days    | 95+ years   | 0.153062       | 0.211028           | 0.115859        | 0.137058            | 0.999851           | 0.999395               |
| Transport injuries [Data Rich]                   | Male   | 0-6 days    | 95+ years   | 0.144423       | 0.202366           | 0.107631        | 0.130652            | 0.99978            | 0.998995               |
| Road injuries [Data Rich]                        | Male   | 0-6 days    | 95+ years   | 0.147432       | 0.208989           | 0.109242        | 0.131877            | 0.99987            | 0.999452               |
| Road injuries [Global]                           | Female | 0-6 days    | 95+ years   | 0.198002       | 0.338885           | 0.139051        | 0.140972            | 0.999736           | 0.993674               |
| Road injuries [Data Rich]                        | Female | 0-6 days    | 95+ years   | 0.154916       | 0.22011            | 0.1163          | 0.138433            | 0.999945           | 0.999642               |
| Road injuries [Global]                           | Male   | 0-6 days    | 95+ years   | 0.193896       | 0.321219           | 0.133033        | 0.13673             | 0.999332           | 0.990834               |
| Pedestrian road injuries [Data Rich]             | Female | 0-6 days    | 95+ years   | 0.183693       | 0.327964           | 0.138           | 0.15929             | 0.999776           | 0.998965               |
| Pedestrian road injuries [Data Rich]             | Male   | 0-6 days    | 95+ years   | 0.177994       | 0.323544           | 0.132557        | 0.159113            | 0.999688           | 0.998913               |
| Pedestrian road injuries [Global]                | Female | 0-6 days    | 95+ years   | 0.240151       | 0.430127           | 0.167669        | 0.173273            | 0.999174           | 0.992328               |
| Pedestrian road injuries [Global]                | Male   | 0-6 days    | 95+ years   | 0.247329       | 0.409191           | 0.168887        | 0.167868            | 0.998229           | 0.990017               |
| Cyclist road injuries [Global]                   | Male   | 1-4 years   | 95+ years   | 0.294776       | 0.527441           | 0.17561         | 0.181197            | 0.998702           | 0.988234               |
| Cyclist road injuries [Data Rich]                | Male   | 1-4 years   | 95+ years   | 0.206919       | 0.500591           | 0.14727         | 0.179981            | 0.999876           | 0.999158               |
| Cyclist road injuries [Global]                   | Female | 1-4 years   | 95+ years   | 0.296895       | 0.528063           | 0.196419        | 0.192579            | 0.998384           | 0.990875               |
| Cyclist road injuries [Data Rich]                | Female | 1-4 years   | 95+ years   | 0.219965       | 0.435983           | 0.16676         | 0.191824            | 0.999892           | 0.999106               |
| Motorcyclist road injuries [Data Rich]           | Female | 0-6 days    | 95+ years   | 0.268406       | 0.653692           | 0.189057        | 0.255584            | 0.999776           | 0.998805               |
| Motorcyclist road injuries [Global]              | Male   | 0-6 days    | 95+ years   | 0.283024       | 0.502588           | 0.170633        | 0.173112            | 0.998804           | 0.987794               |
| Motorcyclist road injuries [Data Rich]           | Male   | 0-6 days    | 95+ years   | 0.195368       | 0.444714           | 0.134742        | 0.163196            | 0.999793           | 0.998395               |
| Motorcyclist road injuries [Global]              | Female | 0-6 days    | 95+ years   | 0.362655       | 0.692762           | 0.225507        | 0.250796            | 0.998726           | 0.99082                |
| Motor vehicle road injuries [Global]             | Male   | 0-6 days    | 95+ years   | 0.232898       | 0.378096           | 0.141782        | 0.143574            | 0.999353           | 0.992869               |
| Motor vehicle road injuries [Global]             | Female | 0-6 days    | 95+ years   | 0.230946       | 0.38664            | 0.145622        | 0.147067            | 0.99957            | 0.995355               |
| Motor vehicle road injuries [Data Rich]          | Female | 0-6 days    | 95+ years   | 0.167766       | 0.33083            | 0.121585        | 0.144001            | 0.99993            | 0.999335               |
| Motor vehicle road injuries [Data Rich]          | Male   | 0-6 days    | 95+ years   | 0.160584       | 0.309726           | 0.11604         | 0.140139            | 0.999919           | 0.999377               |
| Other road injuries [Global]                     | Male   | 0-6 days    | 95+ years   | 0.654189       | 1.0708             | 0.365296        | 0.448322            | 0.984753           | 0.931697               |
| Other road injuries [Data Rich]                  | Female | 0-6 days    | 95+ years   | 0.408852       | 1.04171            | 0.280255        | 0.462492            | 0.997205           | 0.970506               |
| Other road injuries [Data Rich]                  | Male   | 0-6 days    | 95+ years   | 0.467256       | 1.21047            | 0.312997        | 0.526117            | 0.994429           | 0.9463                 |
| Other road injuries [Global]                     | Female | 0-6 days    | 95+ years   | 0.558784       | 0.899497           | 0.319302        | 0.372255            | 0.994899           | 0.96375                |
| Other transport injuries [Global]                | Male   | 0-6 days    | 95+ years   | 0.267514       | 0.49731            | 0.181781        | 0.191778            | 0.998444           | 0.989304               |
| Other transport injuries [Global]                | Female | 0-6 days    | 95+ years   | 0.31846        | 0.546918           | 0.233584        | 0.251507            | 0.998599           | 0.991384               |
| Other transport injuries [Data Rich]             | Female | 0-6 days    | 95+ years   | 0.255843       | 0.406371           | 0.204368        | 0.273542            | 0.999581           | 0.998655               |
| Other transport injuries [Data Rich]             | Male   | 0-6 days    | 95+ years   | 0.195575       | 0.404214           | 0.14874         | 0.189578            | 0.999666           | 0.99863                |
| Unintentional injuries [Data Rich]               | Male   | 28-364 days | 95+ years   | 0.142833       | 0.201973           | 0.111544        | 0.132097            | 0.999458           | 0.998501               |
| Unintentional injuries [Data Rich]               | Female | 28-364 days | 95+ years   | 0.156691       | 0.214427           | 0.123298        | 0.146818            | 0.999456           | 0.998707               |
| Unintentional injuries [Global]                  | Female | 28-364 days | 95+ years   | 0.223546       | 0.327893           | 0.165652        | 0.162305            | 0.998788           | 0.989422               |
| Unintentional injuries [Global]                  | Male   | 28-364 days | 95+ years   | 0.196771       | 0.31494            | 0.156119        | 0.156704            | 0.99765            | 0.981812               |
| Falls [Data Rich]                                | Male   | 0-6 days    | 95+ years   | 0.157114       | 0.220452           | 0.119119        | 0.143696            | 0.999847           | 0.999492               |
| Falls [Data Rich]                                | Female | 0-6 days    | 95+ years   | 0.162773       | 0.237492           | 0.12199         | 0.156404            | 0.999873           | 0.999522               |
| Falls [Global]                                   | Female | 0-6 days    | 95+ years   | 0.246877       | 0.428822           | 0.189489        | 0.191308            | 0.99923            | 0.988577               |
| Falls [Global]                                   | Male   | 0-6 days    | 95+ years   | 0.246101       | 0.369118           | 0.165277        | 0.164869            | 0.999571           | 0.989585               |
| Drowning [Data Rich]                             | Male   | 0-6 days    | 95+ years   | 0.164617       | 0.226899           | 0.127331        | 0.159013            | 0.999868           | 0.999373               |
| Drowning [Global]                                | Male   | 0-6 days    | 95+ years   | 0.224438       | 0.361879           | 0.182847        | 0.181343            | 0.99961            | 0.989534               |
| Drowning [Global]                                | Female | 0-6 days    | 95+ years   | 0.238598       | 0.428467           | 0.181145        | 0.183897            | 0.999657           | 0.992777               |
| Drowning [Data Rich]                             | Female | 0-6 days    | 95+ years   | 0.177905       | 0.258172           | 0.138532        | 0.174585            | 0.999932           | 0.999782               |
| Fire, heat, and hot substances [Global]          | Male   | 0-6 days    | 95+ years   | 0.289708       | 0.40982            | 0.175666        | 0.177018            | 0.999518           | 0.99422                |
| Fire, heat, and hot substances [Global]          | Female | 0-6 days    | 95+ years   | 0.281428       | 0.401798           | 0.177268        | 0.17511             | 0.999483           | 0.994548               |
| Fire, heat, and hot substances [Data Rich]       | Male   | 0-6 days    | 95+ years   | 0.17054        | 0.227618           | 0.131394        | 0.159632            | 0.999944           | 0.999737               |
| Fire, heat, and hot substances [Data Rich]       | Female | 0-6 days    | 95+ years   | 0.175426       | 0.245              | 0.133028        | 0.166203            | 0.999962           | 0.999793               |
| Poisonings [Data Rich]                           | Female | 0-6 days    | 95+ years   | 0.190498       | 0.283924           | 0.14207         | 0.178794            | 0.999901           | 0.999732               |
| Poisonings [Data Rich]                           | Male   | 0-6 days    | 95+ years   | 0.189747       | 0.283639           | 0.136528        | 0.170841            | 0.999888           | 0.999668               |
| Poisonings [Global]                              | Male   | 0-6 days    | 95+ years   | 0.323815       | 0.529806           | 0.211214        | 0.198141            | 0.999166           | 0.992089               |
| Poisonings [Global]                              | Female | 0-6 days    | 95+ years   | 0.311328       | 0.515718           | 0.215045        | 0.2154              | 0.99918            | 0.993385               |
| Poisoning by carbon monoxide [Global]            | Female | 0-6 days    | 95+ years   | 0.353393       | 0.688269           | 0.249665        | 0.267191            | 0.998372           | 0.982832               |
| Poisoning by carbon monoxide [Global]            | Male   | 0-6 days    | 95+ years   | 0.305615       | 0.621778           | 0.221191        | 0.227871            | 0.999006           | 0.983458               |
| Poisoning by carbon monoxide [Data Rich]         | Male   | 0-6 days    | 95+ years   | 0.234913       | 0.328692           | 0.179832        | 0.21337             | 0.999486           | 0.998765               |
| Poisoning by carbon monoxide [Data Rich]         | Female | 0-6 days    | 95+ years   | 0.255034       | 0.352342           | 0.197103        | 0.237672            | 0.999119           | 0.998139               |
| Poisoning by other means [Data Rich]             | Male   | 0-6 days    | 95+ years   | 0.231395       | 0.543185           | 0.156335        | 0.186903            | 0.999871           | 0.998948               |

**Appendix Table 11. CODEm predictive validity results by cause, model type, sex, and age**

| Cause                                                       | Sex    | Age Start   | Age End   | RMSE In-Sample | RMSE Out-of-Sample | Trend In-Sample | Trend Out-of-Sample | Coverage In-Sample | Coverage Out-of-Sample |
|-------------------------------------------------------------|--------|-------------|-----------|----------------|--------------------|-----------------|---------------------|--------------------|------------------------|
| Poisoning by other means [Data Rich]                        | Female | 0-6 days    | 95+ years | 0.208468       | 0.470199           | 0.152018        | 0.196652            | 0.999861           | 0.998144               |
| Poisoning by other means [Global]                           | Female | 0-6 days    | 95+ years | 0.284383       | 0.555132           | 0.18821         | 0.195051            | 0.999746           | 0.989287               |
| Poisoning by other means [Global]                           | Male   | 0-6 days    | 95+ years | 0.288098       | 0.590913           | 0.185717        | 0.192348            | 0.999759           | 0.990146               |
| Exposure to mechanical forces [Data Rich]                   | Female | 0-6 days    | 95+ years | 0.171902       | 0.29354            | 0.123444        | 0.160372            | 0.999636           | 0.99932                |
| Exposure to mechanical forces [Data Rich]                   | Male   | 0-6 days    | 95+ years | 0.162641       | 0.259268           | 0.121518        | 0.153419            | 0.999605           | 0.998955               |
| Exposure to mechanical forces [Global]                      | Female | 0-6 days    | 95+ years | 0.398855       | 0.54379            | 0.325009        | 0.307356            | 0.995672           | 0.987855               |
| Exposure to mechanical forces [Global]                      | Male   | 0-6 days    | 95+ years | 0.325975       | 0.454021           | 0.302392        | 0.286182            | 0.995758           | 0.985214               |
| Unintentional firearm injuries [Data Rich]                  | Female | 0-6 days    | 95+ years | 0.207177       | 0.502831           | 0.141264        | 0.173896            | 0.999619           | 0.999488               |
| Unintentional firearm injuries [Data Rich]                  | Male   | 0-6 days    | 95+ years | 0.221533       | 0.49235            | 0.160933        | 0.191696            | 0.999306           | 0.998449               |
| Unintentional firearm injuries [Global]                     | Female | 0-6 days    | 95+ years | 0.354152       | 0.591674           | 0.184938        | 0.193526            | 0.998979           | 0.991558               |
| Unintentional firearm injuries [Global]                     | Male   | 0-6 days    | 95+ years | 0.355798       | 0.64953            | 0.214783        | 0.218789            | 0.996524           | 0.980841               |
| Other exposure to mechanical forces [Data Rich]             | Female | 0-6 days    | 95+ years | 0.20287        | 0.436518           | 0.139077        | 0.168892            | 0.999912           | 0.999795               |
| Other exposure to mechanical forces [Data Rich]             | Male   | 0-6 days    | 95+ years | 0.170292       | 0.318704           | 0.121799        | 0.149715            | 0.999896           | 0.999761               |
| Other exposure to mechanical forces [Global]                | Male   | 0-6 days    | 95+ years | 0.361646       | 0.472713           | 0.320586        | 0.279794            | 0.995528           | 0.988955               |
| Other exposure to mechanical forces [Global]                | Female | 0-6 days    | 95+ years | 0.406425       | 0.538089           | 0.348431        | 0.308547            | 0.995379           | 0.98994                |
| Adverse effects of medical treatment [Data Rich]            | Male   | 0-6 days    | 95+ years | 0.217278       | 0.342415           | 0.130281        | 0.166336            | 0.999833           | 0.999577               |
| Adverse effects of medical treatment [Data Rich]            | Female | 0-6 days    | 95+ years | 0.186809       | 0.305147           | 0.127779        | 0.162627            | 0.999832           | 0.999511               |
| Adverse effects of medical treatment [Global]               | Male   | 0-6 days    | 95+ years | 0.277028       | 0.431272           | 0.144065        | 0.15098             | 0.999573           | 0.992957               |
| Adverse effects of medical treatment [Global]               | Female | 0-6 days    | 95+ years | 0.280204       | 0.430453           | 0.150466        | 0.157619            | 0.999698           | 0.993818               |
| Animal contact [Data Rich]                                  | Female | 0-6 days    | 95+ years | 0.277226       | 0.439671           | 0.222139        | 0.300641            | 0.999355           | 0.998642               |
| Animal contact [Data Rich]                                  | Male   | 0-6 days    | 95+ years | 0.231627       | 0.414921           | 0.180828        | 0.221935            | 0.999863           | 0.999528               |
| Animal contact [Global]                                     | Male   | 0-6 days    | 95+ years | 0.316647       | 0.623446           | 0.213086        | 0.223006            | 0.9991             | 0.99176                |
| Animal contact [Global]                                     | Female | 0-6 days    | 95+ years | 0.401714       | 0.691306           | 0.25173         | 0.275993            | 0.998669           | 0.987713               |
| Venomous animal contact [Global]                            | Male   | 0-6 days    | 95+ years | 0.449848       | 0.839185           | 0.351378        | 0.380038            | 0.97819            | 0.96024                |
| Venomous animal contact [Global]                            | Female | 0-6 days    | 95+ years | 0.634642       | 0.915323           | 0.352822        | 0.378893            | 0.965066           | 0.949503               |
| Venomous animal contact [Data Rich]                         | Male   | 0-6 days    | 95+ years | 0.401006       | 0.761481           | 0.332766        | 0.442448            | 0.977149           | 0.97478                |
| Venomous animal contact [Data Rich]                         | Female | 0-6 days    | 95+ years | 0.417726       | 0.745234           | 0.329438        | 0.440575            | 0.960501           | 0.956152               |
| Non-venomous animal contact [Global]                        | Female | 0-6 days    | 95+ years | 0.421204       | 0.680417           | 0.264742        | 0.271087            | 0.995082           | 0.9848                 |
| Non-venomous animal contact [Global]                        | Male   | 0-6 days    | 95+ years | 0.471148       | 0.740524           | 0.255509        | 0.255265            | 0.998707           | 0.990622               |
| Non-venomous animal contact [Data Rich]                     | Female | 0-6 days    | 95+ years | 0.304776       | 0.593881           | 0.24239         | 0.309724            | 0.994547           | 0.991865               |
| Non-venomous animal contact [Data Rich]                     | Male   | 0-6 days    | 95+ years | 0.304223       | 0.529077           | 0.229717        | 0.265839            | 0.998929           | 0.998113               |
| Foreign body [Global]                                       | Male   | 0-6 days    | 95+ years | 0.227414       | 0.381598           | 0.150036        | 0.153466            | 0.999262           | 0.998938               |
| Foreign body [Global]                                       | Female | 0-6 days    | 95+ years | 0.216832       | 0.401408           | 0.14365         | 0.149659            | 0.999535           | 0.992467               |
| Foreign body [Data Rich]                                    | Male   | 0-6 days    | 95+ years | 0.166161       | 0.263143           | 0.122292        | 0.1493              | 0.999798           | 0.999305               |
| Foreign body [Data Rich]                                    | Female | 0-6 days    | 95+ years | 0.170699       | 0.275966           | 0.121174        | 0.154315            | 0.999937           | 0.999705               |
| Pulmonary aspiration and foreign body in airway [Data Rich] | Male   | 0-6 days    | 95+ years | 0.178947       | 0.34741            | 0.12591         | 0.147199            | 0.999928           | 0.999294               |
| Pulmonary aspiration and foreign body in airway [Global]    | Male   | 0-6 days    | 95+ years | 0.286472       | 0.422915           | 0.165099        | 0.161459            | 0.998089           | 0.990215               |
| Pulmonary aspiration and foreign body in airway [Global]    | Female | 0-6 days    | 95+ years | 0.267697       | 0.416038           | 0.158871        | 0.159703            | 0.999413           | 0.993624               |
| Pulmonary aspiration and foreign body in airway [Data Rich] | Female | 0-6 days    | 95+ years | 0.174424       | 0.374749           | 0.12444         | 0.148515            | 0.999979           | 0.999572               |
| Foreign body in other body part [Global]                    | Male   | 0-6 days    | 95+ years | 0.478614       | 0.759133           | 0.266854        | 0.270946            | 0.984301           | 0.971436               |
| Foreign body in other body part [Global]                    | Female | 0-6 days    | 95+ years | 0.462299       | 0.749894           | 0.276162        | 0.291338            | 0.98392            | 0.971743               |
| Foreign body in other body part [Data Rich]                 | Female | 0-6 days    | 95+ years | 0.31229        | 0.664465           | 0.223624        | 0.28765             | 0.99005            | 0.987846               |
| Foreign body in other body part [Data Rich]                 | Male   | 0-6 days    | 95+ years | 0.291172       | 0.629172           | 0.203666        | 0.266812            | 0.993547           | 0.991666               |
| Other unintentional injuries [Data Rich]                    | Female | 0-6 days    | 95+ years | 0.266367       | 0.450437           | 0.193873        | 0.255159            | 0.999612           | 0.999067               |
| Other unintentional injuries [Global]                       | Female | 0-6 days    | 95+ years | 0.354782       | 0.671813           | 0.235596        | 0.248741            | 0.997343           | 0.984969               |
| Other unintentional injuries [Global]                       | Male   | 0-6 days    | 95+ years | 0.301256       | 0.54085            | 0.194401        | 0.207741            | 0.997963           | 0.985982               |
| Other unintentional injuries [Data Rich]                    | Male   | 0-6 days    | 95+ years | 0.228051       | 0.387409           | 0.15856         | 0.234168            | 0.999597           | 0.998959               |
| Self-harm and interpersonal violence [Data Rich]            | Female | 0-6 days    | 95+ years | 0.180822       | 0.248466           | 0.126114        | 0.159412            | 0.999728           | 0.999226               |
| Self-harm and interpersonal violence [Data Rich]            | Male   | 0-6 days    | 95+ years | 0.203185       | 0.248576           | 0.122305        | 0.145606            | 0.999512           | 0.99858                |
| Self-harm and interpersonal violence [Global]               | Female | 0-6 days    | 95+ years | 0.246663       | 0.370135           | 0.153591        | 0.160189            | 0.999059           | 0.987598               |
| Self-harm and interpersonal violence [Global]               | Male   | 0-6 days    | 95+ years | 0.247857       | 0.349767           | 0.141919        | 0.14698             | 0.999058           | 0.984796               |
| Self-harm [Global]                                          | Male   | 10-14 years | 95+ years | 0.203341       | 0.347213           | 0.144728        | 0.153668            | 0.999389           | 0.979274               |
| Self-harm [Data Rich]                                       | Male   | 10-14 years | 95+ years | 0.150967       | 0.223371           | 0.116128        | 0.144996            | 0.999688           | 0.999011               |
| Self-harm [Data Rich]                                       | Female | 10-14 years | 95+ years | 0.157456       | 0.236415           | 0.121379        | 0.151772            | 0.999699           | 0.999206               |
| Self-harm [Global]                                          | Female | 10-14 years | 95+ years | 0.219988       | 0.370761           | 0.158161        | 0.163717            | 0.998551           | 0.986222               |
| Self-harm by firearm [Global]                               | Female | 10-14 years | 95+ years | 0.311061       | 0.642889           | 0.206005        | 0.204021            | 0.987894           | 0.971118               |
| Self-harm by firearm [Data Rich]                            | Female | 10-14 years | 95+ years | 0.215778       | 0.439608           | 0.165058        | 0.178991            | 0.992476           | 0.992525               |
| Self-harm by firearm [Global]                               | Male   | 10-14 years | 95+ years | 0.316945       | 0.590367           | 0.186837        | 0.186775            | 0.992646           | 0.977377               |
| Self-harm by firearm [Data Rich]                            | Male   | 10-14 years | 95+ years | 0.19323        | 0.402898           | 0.144063        | 0.168834            | 0.998082           | 0.997457               |
| Self-harm by other specified means [Data Rich]              | Male   | 10-14 years | 95+ years | 0.235129       | 0.322581           | 0.123768        | 0.139678            | 0.999898           | 0.999453               |
| Self-harm by other specified means [Data Rich]              | Female | 10-14 years | 95+ years | 0.162023       | 0.345661           | 0.122196        | 0.143504            | 0.999855           | 0.998854               |
| Self-harm by other specified means [Global]                 | Male   | 10-14 years | 95+ years | 0.192311       | 0.348953           | 0.129309        | 0.132372            | 0.999813           | 0.986603               |
| Self-harm by other specified means [Global]                 | Female | 10-14 years | 95+ years | 0.191636       | 0.38357            | 0.139153        | 0.144468            | 0.999636           | 0.98601                |
| Interpersonal violence [Data Rich]                          | Male   | 0-6 days    | 95+ years | 0.220852       | 0.298197           | 0.181124        | 0.209017            | 0.998132           | 0.995665               |
| Interpersonal violence [Data Rich]                          | Female | 0-6 days    | 95+ years | 0.224081       | 0.294307           | 0.191296        | 0.21615             | 0.99863            | 0.996721               |
| Interpersonal violence [Global]                             | Female | 0-6 days    | 95+ years | 0.306086       | 0.450697           | 0.224458        | 0.228629            | 0.998456           | 0.989396               |
| Interpersonal violence [Global]                             | Male   | 0-6 days    | 95+ years | 0.307439       | 0.479452           | 0.217239        | 0.222115            | 0.997588           | 0.981596               |
| Assault by firearm [Global]                                 | Male   | 0-6 days    | 95+ years | 0.41286        | 0.679294           | 0.241733        | 0.233315            | 0.995867           | 0.981991               |
| Assault by firearm [Global]                                 | Female | 0-6 days    | 95+ years | 0.44617        | 0.621002           | 0.24653         | 0.234512            | 0.993619           | 0.98712                |
| Assault by firearm [Data Rich]                              | Male   | 0-6 days    | 95+ years | 0.277353       | 0.501753           | 0.198059        | 0.224107            | 0.997843           | 0.996142               |
| Assault by firearm [Data Rich]                              | Female | 0-6 days    | 95+ years | 0.253283       | 0.414003           | 0.199997        | 0.209005            | 0.998598           | 0.997318               |
| Assault by sharp object [Data Rich]                         | Female | 0-6 days    | 95+ years | 0.222036       | 0.393235           | 0.17083         | 0.211319            | 0.999815           | 0.999003               |
| Assault by sharp object [Data Rich]                         | Male   | 0-6 days    | 95+ years | 0.235542       | 0.463121           | 0.172019        | 0.205777            | 0.999796           | 0.998721               |
| Assault by sharp object [Global]                            | Female | 0-6 days    | 95+ years | 0.276474       | 0.499795           | 0.19252         | 0.205176            | 0.999526           | 0.993622               |
| Assault by sharp object [Global]                            | Male   | 0-6 days    | 95+ years | 0.332336       | 0.595217           | 0.195244        | 0.202331            | 0.999354           | 0.990212               |
| Assault by other means [Global]                             | Male   | 0-6 days    | 95+ years | 0.285589       | 0.45387            | 0.170058        | 0.1779              | 0.999612           | 0.992595               |
| Assault by other means [Global]                             | Female | 0-6 days    | 95+ years | 0.270287       | 0.410186           | 0.178748        | 0.186147            | 0.999719           | 0.995718               |



**Appendix Table 11. CODEm predictive validity results by cause, model type, sex, and age**

| Cause                                                                              | Sex    | Age Start   | Age End   | RMSE In-Sample | RMSE Out-of-Sample | Trend In-Sample | Trend Out-of-Sample | Coverage In-Sample | Coverage Out-of-Sample |
|------------------------------------------------------------------------------------|--------|-------------|-----------|----------------|--------------------|-----------------|---------------------|--------------------|------------------------|
| Assault by other means [Data Rich]                                                 | Male   | 0-6 days    | 95+ years | 0.202192       | 0.394188           | 0.147473        | 0.187496            | 0.998688           | 0.999051               |
| Assault by other means [Data Rich]                                                 | Female | 0-6 days    | 95+ years | 0.204351       | 0.336239           | 0.157347        | 0.194371            | 0.999954           | 0.999532               |
| Environmental heat and cold exposure [Data Rich]                                   | Male   | 0-6 days    | 95+ years | 0.201821       | 0.309939           | 0.149258        | 0.191454            | 0.999658           | 0.999207               |
| Environmental heat and cold exposure [Data Rich]                                   | Female | 0-6 days    | 95+ years | 0.234754       | 0.399463           | 0.17026         | 0.217807            | 0.999403           | 0.999073               |
| Environmental heat and cold exposure [Global]                                      | Male   | 0-6 days    | 95+ years | 0.33441        | 0.528137           | 0.195693        | 0.198703            | 0.999336           | 0.993068               |
| Environmental heat and cold exposure [Global]                                      | Female | 0-6 days    | 95+ years | 0.35111        | 0.639869           | 0.217264        | 0.228582            | 0.998595           | 0.989061               |
| Acute lymphoid leukaemia [Global]                                                  | Male   | 0-6 days    | 95+ years | 0.360351       | 0.451752           | 0.291587        | 0.289481            | 0.998655           | 0.99529                |
| Acute lymphoid leukaemia [Data Rich]                                               | Male   | 0-6 days    | 95+ years | 0.287617       | 0.377702           | 0.241872        | 0.24054             | 0.998699           | 0.997288               |
| Acute lymphoid leukaemia [Data Rich]                                               | Female | 0-6 days    | 95+ years | 0.291389       | 0.40541            | 0.239542        | 0.248629            | 0.99952            | 0.998143               |
| Acute lymphoid leukaemia [Global]                                                  | Female | 0-6 days    | 95+ years | 0.399584       | 0.485617           | 0.309496        | 0.293586            | 0.999107           | 0.994728               |
| Chronic lymphoid leukaemia [Data Rich]                                             | Male   | 15-19 years | 95+ years | 0.320398       | 0.415714           | 0.264541        | 0.286451            | 0.990891           | 0.989882               |
| Chronic lymphoid leukaemia [Global]                                                | Male   | 15-19 years | 95+ years | 0.496008       | 0.565625           | 0.400319        | 0.359408            | 0.984679           | 0.981912               |
| Chronic lymphoid leukaemia [Data Rich]                                             | Female | 15-19 years | 95+ years | 0.306743       | 0.391433           | 0.262344        | 0.28514             | 0.97326            | 0.972449               |
| Chronic lymphoid leukaemia [Global]                                                | Female | 15-19 years | 95+ years | 0.42419        | 0.513081           | 0.338831        | 0.314293            | 0.972355           | 0.965693               |
| Acute myeloid leukaemia [Data Rich]                                                | Female | 0-6 days    | 95+ years | 0.359647       | 0.411953           | 0.31457         | 0.238757            | 0.999286           | 0.998117               |
| Acute myeloid leukaemia [Global]                                                   | Female | 0-6 days    | 95+ years | 0.409195       | 0.478013           | 0.339914        | 0.311243            | 0.998617           | 0.99501                |
| Acute myeloid leukaemia [Data Rich]                                                | Male   | 0-6 days    | 95+ years | 0.276659       | 0.35807            | 0.225823        | 0.226248            | 0.998996           | 0.998014               |
| Acute myeloid leukaemia [Global]                                                   | Male   | 0-6 days    | 95+ years | 0.38437        | 0.445955           | 0.302055        | 0.290148            | 0.998682           | 0.995197               |
| Chronic myeloid leukaemia [Global]                                                 | Female | 28-364 days | 95+ years | 0.389996       | 0.537869           | 0.312411        | 0.302071            | 0.997703           | 0.992035               |
| Chronic myeloid leukaemia [Global]                                                 | Male   | 28-364 days | 95+ years | 0.337948       | 0.471629           | 0.277875        | 0.267617            | 0.998752           | 0.994641               |
| Chronic myeloid leukaemia [Data Rich]                                              | Female | 28-364 days | 95+ years | 0.31096        | 0.429429           | 0.259569        | 0.237541            | 0.998889           | 0.997202               |
| Chronic myeloid leukaemia [Data Rich]                                              | Male   | 28-364 days | 95+ years | 0.298106       | 0.403428           | 0.255383        | 0.254719            | 0.99904            | 0.997685               |
| Non-melanoma skin cancer (squamous-cell carcinoma) [Global]                        | Female | 28-364 days | 95+ years | 0.276338       | 0.456821           | 0.196598        | 0.20285             | 0.995429           | 0.986363               |
| Non-melanoma skin cancer (squamous-cell carcinoma) [Global]                        | Male   | 28-364 days | 95+ years | 0.189901       | 0.337025           | 0.130911        | 0.134856            | 0.999723           | 0.995758               |
| Non-melanoma skin cancer (squamous-cell carcinoma) [Data Rich]                     | Female | 28-364 days | 95+ years | 0.211862       | 0.316917           | 0.160255        | 0.178766            | 0.997587           | 0.997282               |
| Non-melanoma skin cancer (squamous-cell carcinoma) [Data Rich]                     | Male   | 28-364 days | 95+ years | 0.149343       | 0.244394           | 0.108928        | 0.131268            | 0.999868           | 0.999694               |
| Executions and police conflict [Data Rich]                                         | Female | 28-364 days | 95+ years | 0.852242       | 1.4431             | 0.699432        | 0.757438            | 0.49803            | 0.533053               |
| Executions and police conflict [Global]                                            | Male   | 28-364 days | 95+ years | 1.04755        | 1.95756            | 0.80644         | 0.81359             | 0.671496           | 0.659889               |
| Executions and police conflict [Global]                                            | Female | 28-364 days | 95+ years | 1.2422         | 1.86518            | 0.735216        | 0.76339             | 0.541687           | 0.549016               |
| Executions and police conflict [Data Rich]                                         | Male   | 28-364 days | 95+ years | 0.970597       | 1.55607            | 0.800001        | 0.766745            | 0.629313           | 0.628953               |
| Alcoholic cardiomyopathy [Data Rich]                                               | Female | 15-19 years | 95+ years | 0.345702       | 0.511805           | 0.264343        | 0.187142            | 0.996512           | 0.993299               |
| Alcoholic cardiomyopathy [Data Rich]                                               | Male   | 15-19 years | 95+ years | 0.38519        | 0.554285           | 0.29504         | 0.17896             | 0.993717           | 0.987677               |
| Alcoholic cardiomyopathy [Global]                                                  | Female | 15-19 years | 95+ years | 0.376465       | 0.663674           | 0.277711        | 0.267767            | 0.996067           | 0.980012               |
| Alcoholic cardiomyopathy [Global]                                                  | Male   | 15-19 years | 95+ years | 0.412099       | 0.646461           | 0.311022        | 0.303632            | 0.99358            | 0.975738               |
| Myocarditis [Global]                                                               | Female | 0-6 days    | 95+ years | 0.414466       | 0.667589           | 0.251903        | 0.255983            | 0.998967           | 0.982773               |
| Myocarditis [Global]                                                               | Male   | 0-6 days    | 95+ years | 0.375733       | 0.618215           | 0.216298        | 0.222883            | 0.999695           | 0.987961               |
| Myocarditis [Data Rich]                                                            | Female | 0-6 days    | 95+ years | 0.400048       | 0.522515           | 0.237676        | 0.249737            | 0.999187           | 0.99799                |
| Myocarditis [Data Rich]                                                            | Male   | 0-6 days    | 95+ years | 0.371834       | 0.491129           | 0.202211        | 0.219877            | 0.999771           | 0.999312               |
| Other leukaemia [Data Rich]                                                        | Female | 0-6 days    | 95+ years | 0.361771       | 0.445428           | 0.318469        | 0.346724            | 0.997042           | 0.994637               |
| Other leukaemia [Global]                                                           | Female | 0-6 days    | 95+ years | 0.424782       | 0.525856           | 0.354536        | 0.355696            | 0.997749           | 0.990814               |
| Other leukaemia [Data Rich]                                                        | Male   | 0-6 days    | 95+ years | 0.352774       | 0.43924            | 0.311407        | 0.350282            | 0.996578           | 0.994183               |
| Other leukaemia [Global]                                                           | Male   | 0-6 days    | 95+ years | 0.429512       | 0.518574           | 0.354782        | 0.357664            | 0.997536           | 0.989642               |
| Other cardiomyopathy [Data Rich]                                                   | Female | 0-6 days    | 95+ years | 0.258162       | 0.408189           | 0.173489        | 0.183158            | 0.999004           | 0.998063               |
| Other cardiomyopathy [Data Rich]                                                   | Male   | 0-6 days    | 95+ years | 0.309364       | 0.398052           | 0.201191        | 0.175444            | 0.99715            | 0.995256               |
| Other cardiomyopathy [Global]                                                      | Male   | 0-6 days    | 95+ years | 0.336223       | 0.550688           | 0.217119        | 0.214412            | 0.996793           | 0.982966               |
| Other cardiomyopathy [Global]                                                      | Female | 0-6 days    | 95+ years | 0.344397       | 0.609067           | 0.198003        | 0.201045            | 0.998764           | 0.984332               |
| Myelodysplastic, myeloproliferative, and other hematopoietic neoplasms [Global]    | Female | 0-6 days    | 95+ years | 0.315455       | 0.596596           | 0.200512        | 0.208611            | 0.991971           | 0.983798               |
| Myelodysplastic, myeloproliferative, and other hematopoietic neoplasms [Global]    | Male   | 0-6 days    | 95+ years | 0.394166       | 0.600708           | 0.205384        | 0.215614            | 0.993004           | 0.983015               |
| Myelodysplastic, myeloproliferative, and other hematopoietic neoplasms [Data Rich] | Female | 0-6 days    | 95+ years | 0.232351       | 0.367761           | 0.142188        | 0.18576             | 0.996857           | 0.996755               |
| Other benign and in situ neoplasms [Global]                                        | Female | 0-6 days    | 95+ years | 2.75293        | 2.93949            | 0.81278         | 0.806859            | 0.127719           | 0.150787               |
| Other benign and in situ neoplasms [Data Rich]                                     | Female | 0-6 days    | 95+ years | 2.80797        | 2.97214            | 0.729955        | 0.699571            | 0.0603269          | 0.0907468              |
| Other benign and in situ neoplasms [Data Rich]                                     | Male   | 0-6 days    | 95+ years | 2.68981        | 3.0604             | 0.683353        | 0.649078            | 0.085561           | 0.111144               |
| Other benign and in situ neoplasms [Global]                                        | Male   | 0-6 days    | 95+ years | 2.68072        | 3.02389            | 0.764542        | 0.77388             | 0.111527           | 0.127693               |
| Non-rheumatic calcific aortic valve disease [Global]                               | Female | 15-19 years | 95+ years | 0.291265       | 0.495363           | 0.168634        | 0.170314            | 0.999473           | 0.991504               |
| Non-rheumatic calcific aortic valve disease [Global]                               | Male   | 15-19 years | 95+ years | 0.276424       | 0.450114           | 0.172528        | 0.178781            | 0.999697           | 0.993266               |
| Non-rheumatic calcific aortic valve disease [Data Rich]                            | Female | 15-19 years | 95+ years | 0.239981       | 0.385419           | 0.147063        | 0.154632            | 0.999902           | 0.999671               |
| Non-rheumatic calcific aortic valve disease [Data Rich]                            | Male   | 15-19 years | 95+ years | 0.24514        | 0.425103           | 0.154101        | 0.169537            | 0.999929           | 0.999766               |
| Non-rheumatic degenerative mitral valve disease [Data Rich]                        | Male   | 15-19 years | 95+ years | 0.21931        | 0.351707           | 0.155353        | 0.16266             | 0.999865           | 0.999728               |
| Non-rheumatic degenerative mitral valve disease [Data Rich]                        | Female | 15-19 years | 95+ years | 0.231637       | 0.345074           | 0.154328        | 0.155704            | 0.999717           | 0.999312               |
| Non-rheumatic degenerative mitral valve disease [Global]                           | Male   | 15-19 years | 95+ years | 0.253489       | 0.439845           | 0.176412        | 0.178288            | 0.999442           | 0.994051               |
| Non-rheumatic degenerative mitral valve disease [Global]                           | Female | 15-19 years | 95+ years | 0.2551         | 0.474719           | 0.174153        | 0.177981            | 0.999369           | 0.991705               |
| Other non-rheumatic valve diseases [Global]                                        | Male   | 15-19 years | 95+ years | 0.553722       | 0.869604           | 0.342819        | 0.36402             | 0.995755           | 0.968504               |
| Other non-rheumatic valve diseases [Global]                                        | Female | 15-19 years | 95+ years | 0.534284       | 0.804774           | 0.322722        | 0.331804            | 0.996774           | 0.977447               |
| Other non-rheumatic valve diseases [Data Rich]                                     | Male   | 15-19 years | 95+ years | 0.505063       | 0.768468           | 0.324633        | 0.3666              | 0.996946           | 0.993732               |
| Other non-rheumatic valve diseases [Data Rich]                                     | Female | 15-19 years | 95+ years | 0.485525       | 0.682108           | 0.303781        | 0.349154            | 0.997792           | 0.996009               |
| Diabetes mellitus type 1 [Data Rich]                                               | Male   | 0-6 days    | 95+ years | 0.178818       | 0.430484           | 0.106501        | 0.124143            | 0.999814           | 0.998822               |
| Diabetes mellitus type 1 [Data Rich]                                               | Female | 0-6 days    | 95+ years | 0.206878       | 0.396264           | 0.110097        | 0.130862            | 0.999716           | 0.998881               |
| Diabetes mellitus type 1 [Global]                                                  | Female | 0-6 days    | 95+ years | 0.250562       | 0.464939           | 0.141123        | 0.143551            | 0.998929           | 0.985647               |
| Diabetes mellitus type 1 [Global]                                                  | Male   | 0-6 days    | 95+ years | 0.244831       | 0.445572           | 0.135104        | 0.137963            | 0.999482           | 0.989783               |
| Diabetes mellitus type 2 [Data Rich]                                               | Female | 15-19 years | 95+ years | 0.161807       | 0.310356           | 0.103286        | 0.120593            | 0.998504           | 0.996995               |
| Diabetes mellitus type 2 [Data Rich]                                               | Male   | 15-19 years | 95+ years | 0.156991       | 0.276519           | 0.103509        | 0.125174            | 0.999223           | 0.998107               |
| Diabetes mellitus type 2 [Global]                                                  | Male   | 15-19 years | 95+ years | 0.198592       | 0.380017           | 0.126608        | 0.131703            | 0.9989             | 0.987107               |

**Appendix Table 11. CODEm predictive validity results by cause, model type, sex, and age**

| Cause                                       | Sex    | Age Start   | Age End   | RMSE In-Sample | RMSE Out-of-Sample | Trend In-Sample | Trend Out-of-Sample | Coverage In-Sample | Coverage Out-of-Sample |
|---------------------------------------------|--------|-------------|-----------|----------------|--------------------|-----------------|---------------------|--------------------|------------------------|
| Diabetes mellitus type 2 [Global]           | Female | 15-19 years | 95+ years | 0.218751       | 0.391436           | 0.133026        | 0.132677            | 0.998043           | 0.986063               |
| Bacterial skin diseases [Data Rich]         | Male   | 0-6 days    | 95+ years | 0.398907       | 0.73911            | 0.164583        | 0.203495            | 0.988368           | 0.989327               |
| Bacterial skin diseases [Global]            | Male   | 0-6 days    | 95+ years | 0.526811       | 0.874292           | 0.205193        | 0.216681            | 0.987754           | 0.972578               |
| Bacterial skin diseases [Data Rich]         | Female | 0-6 days    | 95+ years | 0.46068        | 0.748566           | 0.152715        | 0.182001            | 0.990379           | 0.990247               |
| Bacterial skin diseases [Global]            | Female | 0-6 days    | 95+ years | 0.482824       | 0.855646           | 0.190134        | 0.19802             | 0.991455           | 0.977058               |
| Upper digestive system diseases [Data Rich] | Female | 1-4 years   | 95+ years | 0.164967       | 0.229872           | 0.121911        | 0.156979            | 0.999913           | 0.999538               |
| Upper digestive system diseases [Global]    | Male   | 1-4 years   | 95+ years | 0.223992       | 0.368878           | 0.148477        | 0.148259            | 0.999333           | 0.985047               |
| Upper digestive system diseases [Data Rich] | Male   | 1-4 years   | 95+ years | 0.157538       | 0.215343           | 0.119806        | 0.140611            | 0.999829           | 0.999495               |
| Upper digestive system diseases [Global]    | Female | 1-4 years   | 95+ years | 0.238352       | 0.379809           | 0.159187        | 0.155754            | 0.999392           | 0.988125               |

**Appendix Table 12: Modeling strategy for individual cause of death models in GBD 2017**

| Cause name                                                                    | Level     | Model type                                                                                                                            |
|-------------------------------------------------------------------------------|-----------|---------------------------------------------------------------------------------------------------------------------------------------|
| Communicable, maternal, neonatal, and nutritional diseases                    | Aggregate |                                                                                                                                       |
| HIV/AIDS and sexually transmitted infections                                  | Aggregate |                                                                                                                                       |
| HIV/AIDS                                                                      | 3         | Spectrum                                                                                                                              |
| HIV/AIDS - Drug-susceptible Tuberculosis                                      | 4         | Data proportion                                                                                                                       |
| HIV/AIDS - Multidrug-resistant Tuberculosis without extensive drug resistance | 4         | Data proportion                                                                                                                       |
| HIV/AIDS - Extensively drug-resistant Tuberculosis                            | 4         | Data proportion                                                                                                                       |
| HIV/AIDS resulting in other diseases                                          | 4         | Spectrum                                                                                                                              |
| Sexually transmitted infections excluding HIV                                 | 3         | CODEm; natural history model (congenital syphilis)                                                                                    |
| Syphilis                                                                      | 4         | Data proportion (age/sex-specific VR); natural history model (congenital syphilis)                                                    |
| Chlamydial infection                                                          | 4         | Data proportion (age/sex-specific VR)                                                                                                 |
| Gonococcal infection                                                          | 4         | Data proportion (age/sex-specific VR)                                                                                                 |
| Other sexually transmitted diseases                                           | 4         | Data proportion (age/sex-specific VR)                                                                                                 |
| Respiratory infections and tuberculosis                                       | Aggregate |                                                                                                                                       |
| Tuberculosis                                                                  | 3         | CODEm                                                                                                                                 |
| Drug-susceptible tuberculosis                                                 | 4         | Spatio-temporal Gaussian process regression proportion                                                                                |
| Multidrug-resistant tuberculosis without extensive drug resistance            | 4         | Spatio-temporal Gaussian process regression proportion                                                                                |
| Extensively drug-resistant tuberculosis                                       | 4         | Spatio-temporal Gaussian process regression proportion                                                                                |
| Lower respiratory infections                                                  | 3         | CODEm                                                                                                                                 |
| Upper respiratory infections                                                  | 3         | CODEm                                                                                                                                 |
| Otitis media                                                                  | 3         | CODEm                                                                                                                                 |
| Enteric infections                                                            | Aggregate |                                                                                                                                       |
| Diarrheal diseases                                                            | 3         | CODEm; Fatal discontinuity                                                                                                            |
| Typhoid and paratyphoid                                                       | Aggregate |                                                                                                                                       |
| Typhoid fever                                                                 | 4         | CODEm (data rich countries); natural history model (non-data rich countries)                                                          |
| Paratyphoid fever                                                             | 4         | CODEm (data rich countries); natural history model (non-data rich countries)                                                          |
| Invasive Non-typhoidal Salmonella (iNTS)                                      | 3         | Natural history model                                                                                                                 |
| Other intestinal infectious diseases                                          | 3         | Negative binomial regression                                                                                                          |
| Neglected tropical diseases and malaria                                       | Aggregate |                                                                                                                                       |
| Malaria                                                                       | 3         | CODEm (P. falciparum outside of Africa); natural history model (P. falciparum within Africa); negative binomial regression (P. vivax) |
| Chagas disease                                                                | 3         | CODEm                                                                                                                                 |
| Leishmaniasis                                                                 | Aggregate |                                                                                                                                       |
| Visceral leishmaniasis                                                        | 4         | Natural history model                                                                                                                 |
| African trypanosomiasis                                                       | 3         | Natural history model                                                                                                                 |
| Schistosomiasis                                                               | 3         | Negative binomial regression                                                                                                          |
| Cysticercosis                                                                 | 3         | Negative binomial regression                                                                                                          |
| Cystic echinococcosis                                                         | 3         | Negative binomial regression                                                                                                          |
| Dengue                                                                        | 3         | CODEm                                                                                                                                 |
| Yellow fever                                                                  | 3         | Natural history model                                                                                                                 |
| Rabies                                                                        | 3         | CODEm                                                                                                                                 |
| Intestinal nematode infections                                                | Aggregate |                                                                                                                                       |
| Ascariasis                                                                    | 4         | Negative binomial regression                                                                                                          |
| Ebola                                                                         | 3         | Fatal discontinuity                                                                                                                   |
| Zika virus                                                                    | 3         | Natural history model                                                                                                                 |
| Other neglected tropical diseases                                             | 3         | CODEm                                                                                                                                 |
| Other infectious diseases                                                     | Aggregate |                                                                                                                                       |
| Meningitis                                                                    | 3         | CODEm                                                                                                                                 |
| Pneumococcal meningitis                                                       | 4         | DisMod MR-2.1 proportion model                                                                                                        |
| H influenzae type B meningitis                                                | 4         | DisMod MR-2.1 proportion model                                                                                                        |
| Meningococcal meningitis                                                      | 4         | DisMod MR-2.1 proportion model; Fatal discontinuity                                                                                   |
| Other meningitis                                                              | 4         | DisMod MR-2.1 proportion model                                                                                                        |



**Appendix Table 12: Modeling strategy for individual cause of death models in GBD 2017**

| Cause name                                               | Level     | Model type                                                                          |
|----------------------------------------------------------|-----------|-------------------------------------------------------------------------------------|
| Encephalitis                                             | 3         | CODEm                                                                               |
| Diphtheria                                               | 3         | CODEm (data rich countries); negative binomial regression (non-data rich countries) |
| Whooping cough                                           | 3         | CODEm (data rich countries); natural history model (non-data rich countries)        |
| Tetanus                                                  | 3         | CODEm                                                                               |
| Measles                                                  | 3         | CODEm (data rich countries); natural history model (non-data rich countries)        |
| Varicella and herpes zoster                              | 3         | CODEm (data rich countries); negative binomial regression (non-data rich countries) |
| Acute hepatitis                                          | 3         | CODEm                                                                               |
| Acute hepatitis A                                        | 4         | Natural history model                                                               |
| Acute hepatitis B                                        | 4         | DisMod MR-2.1 cause-specific mortality model                                        |
| Acute hepatitis C                                        | 4         | DisMod MR-2.1 cause-specific mortality model                                        |
| Acute hepatitis E                                        | 4         | DisMod MR-2.1 cause-specific mortality model                                        |
| Other unspecified infectious diseases                    | 3         | CODEm                                                                               |
| Maternal and neonatal disorders                          | Aggregate |                                                                                     |
| Maternal disorders                                       | 3         | CODEm                                                                               |
| Maternal hemorrhage                                      | 4         | Spatio-temporal Gaussian process regression                                         |
| Maternal sepsis and other maternal infections            | 4         | Spatio-temporal Gaussian process regression                                         |
| Maternal hypertensive disorders                          | 4         | Spatio-temporal Gaussian process regression                                         |
| Maternal obstructed labor and uterine rupture            | 4         | Spatio-temporal Gaussian process regression                                         |
| Maternal abortion and miscarriage                        | 4         | Spatio-temporal Gaussian process regression                                         |
| Ectopic pregnancy                                        | 4         | Spatio-temporal Gaussian process regression proportion                              |
| Indirect maternal deaths                                 | 4         | Spatio-temporal Gaussian process regression                                         |
| Late maternal deaths                                     | 4         | Spatio-temporal Gaussian process regression                                         |
| Maternal deaths aggravated by HIV/AIDS                   | 4         | Spatio-temporal Gaussian process regression                                         |
| Other maternal disorders                                 | 4         | DisMod MR-2.1 proportion model                                                      |
| Neonatal disorders                                       | 3         | CODEm                                                                               |
| Neonatal preterm birth                                   | 4         | CODEm                                                                               |
| Neonatal encephalopathy due to birth asphyxia and trauma | 4         | CODEm                                                                               |
| Neonatal sepsis and other neonatal infections            | 4         | CODEm                                                                               |
| Hemolytic disease and other neonatal jaundice            | 4         | CODEm                                                                               |
| Other neonatal disorders                                 | 4         | CODEm                                                                               |
| Nutritional deficiencies                                 | 2         | CODEm                                                                               |
| Protein-energy malnutrition                              | 3         | CODEm; Fatal discontinuity                                                          |
| Other nutritional deficiencies                           | 3         | CODEm                                                                               |
| Non-communicable diseases                                | Aggregate |                                                                                     |
| Neoplasms                                                | Aggregate |                                                                                     |
| Lip and oral cavity cancer                               | 3         | CODEm                                                                               |
| Nasopharynx cancer                                       | 3         | CODEm                                                                               |
| Other pharynx cancer                                     | 3         | CODEm                                                                               |
| Esophageal cancer                                        | 3         | CODEm                                                                               |
| Stomach cancer                                           | 3         | CODEm                                                                               |
| Colon and rectum cancer                                  | 3         | CODEm                                                                               |
| Liver cancer                                             | 3         | CODEm                                                                               |
| Liver cancer due to hepatitis B                          | 4         | DisMod MR-2.1 proportion model                                                      |
| Liver cancer due to hepatitis C                          | 4         | DisMod MR-2.1 proportion model                                                      |
| Liver cancer due to alcohol use                          | 4         | DisMod MR-2.1 proportion model                                                      |
| Liver cancer due to NASH                                 | 4         | DisMod MR-2.1 proportion model                                                      |
| Liver cancer due to other causes                         | 4         | DisMod MR-2.1 proportion model                                                      |
| Gallbladder and biliary tract cancer                     | 3         | CODEm                                                                               |
| Pancreatic cancer                                        | 3         | CODEm                                                                               |
| Larynx cancer                                            | 3         | CODEm                                                                               |
| Tracheal, bronchus, and lung cancer                      | 3         | CODEm                                                                               |
| Malignant skin melanoma                                  | 3         | CODEm                                                                               |
| Non-melanoma skin cancer                                 | Aggregate |                                                                                     |

**Appendix Table 12: Modeling strategy for individual cause of death models in GBD 2017**

| Cause name                                                             | Level     | Model type |
|------------------------------------------------------------------------|-----------|------------|
| Non-melanoma skin cancer (squamous-cell carcinoma)                     | 4         | CODEm      |
| Breast cancer                                                          | 3         | CODEm      |
| Cervical cancer                                                        | 3         | CODEm      |
| Uterine cancer                                                         | 3         | CODEm      |
| Ovarian cancer                                                         | 3         | CODEm      |
| Prostate cancer                                                        | 3         | CODEm      |
| Testicular cancer                                                      | 3         | CODEm      |
| Kidney cancer                                                          | 3         | CODEm      |
| Bladder cancer                                                         | 3         | CODEm      |
| Brain and nervous system cancer                                        | 3         | CODEm      |
| Thyroid cancer                                                         | 3         | CODEm      |
| Mesothelioma                                                           | 3         | CODEm      |
| Hodgkin lymphoma                                                       | 3         | CODEm      |
| Non-Hodgkin lymphoma                                                   | 3         | CODEm      |
| Multiple myeloma                                                       | 3         | CODEm      |
| Leukemia                                                               | 3         | CODEm      |
| Acute lymphoid leukemia                                                | 4         | CODEm      |
| Chronic lymphoid leukemia                                              | 4         | CODEm      |
| Acute myeloid leukemia                                                 | 4         | CODEm      |
| Chronic myeloid leukemia                                               | 4         | CODEm      |
| Other leukemia                                                         | 4         | CODEm      |
| Other malignant neoplasms                                              | 3         | CODEm      |
| Other neoplasms                                                        | Aggregate |            |
| Myelodysplastic, myeloproliferative, and other hematopoietic neoplasms | 4         | CODEm      |
| Other benign and in situ neoplasms                                     | 4         | CODEm      |
| Cardiovascular diseases                                                | 2         | CODEm      |
| Rheumatic heart disease                                                | 3         | CODEm      |
| Ischemic heart disease                                                 | 3         | CODEm      |
| Stroke                                                                 | 3         | CODEm      |
| Ischemic stroke                                                        | 4         | CODEm      |
| Intracerebral hemorrhage                                               | 4         | CODEm      |
| Subarachnoid hemorrhage                                                | 4         | CODEm      |
| Hypertensive heart disease                                             | 3         | CODEm      |
| Non-rheumatic valvular heart disease                                   | 3         | CODEm      |
| Non-rheumatic calcific aortic valve disease                            | 4         | CODEm      |
| Non-rheumatic degenerative mitral valve disease                        | 4         | CODEm      |
| Other non-rheumatic valve diseases                                     | 4         | CODEm      |
| Cardiomyopathy and myocarditis                                         | 3         | CODEm      |
| Myocarditis                                                            | 4         | CODEm      |
| Alcoholic cardiomyopathy                                               | 4         | CODEm      |
| Other cardiomyopathy                                                   | 4         | CODEm      |
| Atrial fibrillation and flutter                                        | 3         | CODEm      |
| Aortic aneurysm                                                        | 3         | CODEm      |
| Peripheral artery disease                                              | 3         | CODEm      |
| Endocarditis                                                           | 3         | CODEm      |
| Other cardiovascular and circulatory diseases                          | 3         | CODEm      |
| Chronic respiratory diseases                                           | 2         | CODEm      |
| Chronic obstructive pulmonary disease                                  | 3         | CODEm      |
| Pneumoconiosis                                                         | 3         | CODEm      |
| Silicosis                                                              | 4         | CODEm      |
| Asbestosis                                                             | 4         | CODEm      |
| Coal workers pneumoconiosis                                            | 4         | CODEm      |
| Other pneumoconiosis                                                   | 4         | CODEm      |
| Asthma                                                                 | 3         | CODEm      |

**Appendix Table 12: Modeling strategy for individual cause of death models in GBD 2017**

| Cause name                                                     | Level     | Model type                     |
|----------------------------------------------------------------|-----------|--------------------------------|
| Interstitial lung disease and pulmonary sarcoidosis            | 3         | CODEm                          |
| Other chronic respiratory diseases                             | 3         | CODEm                          |
| Digestive diseases                                             | 2         | CODEm                          |
| Cirrhosis and other chronic liver diseases                     | 3         | CODEm                          |
| Cirrhosis and other chronic liver diseases due to hepatitis B  | 4         | DisMod MR-2.1 proportion model |
| Cirrhosis and other chronic liver diseases due to hepatitis C  | 4         | DisMod MR-2.1 proportion model |
| Cirrhosis and other chronic liver diseases due to alcohol use  | 4         | DisMod MR-2.1 proportion model |
| Cirrhosis due to NASH                                          | 4         | DisMod MR-2.1 proportion model |
| Cirrhosis and other chronic liver diseases due to other causes | 4         | DisMod MR-2.1 proportion model |
| Upper digestive system diseases                                | 3         | CODEm                          |
| Peptic ulcer disease                                           | 4         | CODEm                          |
| Gastritis and duodenitis                                       | 4         | CODEm                          |
| Appendicitis                                                   | 3         | CODEm                          |
| Paralytic ileus and intestinal obstruction                     | 3         | CODEm                          |
| Inguinal, femoral, and abdominal hernia                        | 3         | CODEm                          |
| Inflammatory bowel disease                                     | 3         | CODEm                          |
| Vascular intestinal disorders                                  | 3         | CODEm                          |
| Gallbladder and biliary diseases                               | 3         | CODEm                          |
| Pancreatitis                                                   | 3         | CODEm                          |
| Other digestive diseases                                       | 3         | CODEm                          |
| Neurological disorders                                         | Aggregate |                                |
| Alzheimer's disease and other dementias                        | 3         | CODEm                          |
| Parkinson's disease                                            | 3         | CODEm                          |
| Epilepsy                                                       | 3         | CODEm                          |
| Multiple sclerosis                                             | 3         | CODEm                          |
| Motor neuron disease                                           | 3         | CODEm                          |
| Other neurological disorders                                   | 3         | CODEm                          |
| Mental disorders                                               | Aggregate |                                |
| Eating disorders                                               | 3         | CODEm                          |
| Anorexia nervosa                                               | 4         | CODEm                          |
| Bulimia nervosa                                                | 4         | CODEm                          |
| Substance use disorders                                        | Aggregate |                                |
| Alcohol use disorders                                          | 3         | CODEm                          |
| Drug use disorders                                             | 3         | CODEm                          |
| Opioid use disorders                                           | 4         | CODEm                          |
| Cocaine use disorders                                          | 4         | CODEm                          |
| Amphetamine use disorders                                      | 4         | CODEm                          |
| Other drug use disorders                                       | 4         | CODEm                          |
| Diabetes and kidney diseases                                   | Aggregate |                                |
| Diabetes mellitus                                              | 3         | CODEm                          |
| Diabetes mellitus type 1                                       | 4         | CODEm                          |
| Diabetes mellitus type 2                                       | 4         | CODEm                          |
| Chronic kidney disease                                         | 3         | CODEm                          |
| Chronic kidney disease due to diabetes mellitus type 1         | 4         | DisMod MR-2.1 proportion model |
| Chronic kidney disease due to diabetes mellitus type 2         | 4         | DisMod MR-2.1 proportion model |
| Chronic kidney disease due to hypertension                     | 4         | DisMod MR-2.1 proportion model |
| Chronic kidney disease due to glomerulonephritis               | 4         | DisMod MR-2.1 proportion model |
| Chronic kidney disease due to other causes                     | 4         | DisMod MR-2.1 proportion model |
| Acute glomerulonephritis                                       | 3         | CODEm                          |
| Skin and subcutaneous diseases                                 | 2         | CODEm                          |
| Bacterial skin diseases                                        | 3         | CODEm                          |

**Appendix Table 12: Modeling strategy for individual cause of death models in GBD 2017**

| Cause name                                        | Level     | Model type                                   |
|---------------------------------------------------|-----------|----------------------------------------------|
| Cellulitis                                        | 4         | CODEm                                        |
| Pyoderma                                          | 4         | CODEm                                        |
| Decubitus ulcer                                   | 3         | CODEm                                        |
| Other skin and subcutaneous diseases              | 3         | CODEm                                        |
| Musculoskeletal disorders                         | 2         | CODEm                                        |
| Rheumatoid arthritis                              | 3         | CODEm                                        |
| Other musculoskeletal disorders                   | 3         | CODEm                                        |
| Other non-communicable diseases                   | Aggregate |                                              |
| Congenital birth defects                          | 3         | CODEm                                        |
| Neural tube defects                               | 4         | CODEm                                        |
| Congenital heart anomalies                        | 4         | CODEm                                        |
| Orofacial clefts                                  | 4         | CODEm                                        |
| Down syndrome                                     | 4         | CODEm                                        |
| Other chromosomal abnormalities                   | 4         | CODEm                                        |
| Congenital musculoskeletal and limb anomalies     | 4         | CODEm                                        |
| Urogenital congenital anomalies                   | 4         | CODEm                                        |
| Digestive congenital anomalies                    | 4         | CODEm                                        |
| Other congenital birth defects                    | 4         | CODEm                                        |
| Urinary diseases and male infertility             | 3         | CODEm                                        |
| Urinary tract infections                          | 4         | CODEm                                        |
| Urolithiasis                                      | 4         | CODEm                                        |
| Other urinary diseases                            | 4         | CODEm                                        |
| Gynecological diseases                            | 3         | CODEm                                        |
| Uterine fibroids                                  | 4         | CODEm                                        |
| Polycystic ovarian syndrome                       | 4         | CODEm                                        |
| Endometriosis                                     | 4         | CODEm                                        |
| Genital prolapse                                  | 4         | CODEm                                        |
| Other gynecological diseases                      | 4         | CODEm                                        |
| Hemoglobinopathies and hemolytic anemias          | 3         | CODEm                                        |
| Thalassemias                                      | 4         | DisMod MR-2.1 cause-specific mortality model |
| Sickle cell disorders                             | 4         | DisMod MR-2.1 cause-specific mortality model |
| G6PD deficiency                                   | 4         | DisMod MR-2.1 cause-specific mortality model |
| Other hemoglobinopathies and hemolytic anemias    | 4         | Data proportion                              |
| Endocrine, metabolic, blood, and immune disorders | 3         | CODEm                                        |
| Sudden infant death syndrome                      | 3         | CODEm                                        |
| Injuries                                          | Aggregate |                                              |
| Transport injuries                                | 2         | CODEm                                        |
| Road injuries                                     | 3         | CODEm; Fatal discontinuity                   |
| Pedestrian road injuries                          | 4         | CODEm                                        |
| Cyclist road injuries                             | 4         | CODEm                                        |
| Motorecyclist road injuries                       | 4         | CODEm                                        |
| Motor vehicle road injuries                       | 4         | CODEm                                        |
| Other road injuries                               | 4         | CODEm                                        |
| Other transport injuries                          | 3         | CODEm; Fatal discontinuity                   |
| Unintentional injuries                            | Aggregate |                                              |
| Falls                                             | 3         | CODEm                                        |
| Drowning                                          | 3         | CODEm                                        |
| Fire, heat, and hot substances                    | 3         | CODEm; Fatal discontinuity                   |
| Poisonings                                        | 3         | CODEm; Fatal discontinuity                   |
| Poisoning by carbon monoxide                      | 4         | CODEm                                        |
| Poisoning by other means                          | 4         | CODEm                                        |
| Exposure to mechanical forces                     | Aggregate |                                              |
| Unintentional firearm injuries                    | 4         | CODEm                                        |
| Other exposure to mechanical forces               | 4         | CODEm; Fatal discontinuity                   |
| Adverse effects of medical treatment              | 3         | CODEm                                        |
| Animal contact                                    | 3         | CODEm                                        |

**Appendix Table 12: Modeling strategy for individual cause of death models in GBD 2017**

| Cause name                                      | Level     | Model type                 |
|-------------------------------------------------|-----------|----------------------------|
| Venomous animal contact                         | 4         | CODEm                      |
| Non-venomous animal contact                     | 4         | CODEm                      |
| Foreign body                                    | Aggregate |                            |
| Pulmonary aspiration and foreign body in airway | 4         | CODEm                      |
| Foreign body in other body part                 | 4         | CODEm                      |
| Environmental heat and cold exposure            | 3         | CODEm; Fatal discontinuity |
| Exposure to forces of nature                    | 3         | Fatal discontinuity        |
| Other unintentional injuries                    | 3         | CODEm                      |
| Self-harm and interpersonal violence            | Aggregate |                            |
| Self-harm                                       | 3         | CODEm                      |
| Self-harm by firearm                            | 4         | CODEm                      |
| Self-harm by other specified means              | 4         | CODEm                      |
| Interpersonal violence                          | 3         | CODEm                      |
| Physical violence by firearm                    | 4         | CODEm                      |
| Physical violence by sharp object               | 4         | CODEm                      |
| Physical violence by other means                | 4         | CODEm                      |
| Conflict and terrorism                          | 3         | Fatal discontinuity        |
| Executions and police conflict                  | 3         | CODEm; Fatal discontinuity |

**Appendix Table 13. Causes included in the 2017 Global Burden of Disease Study**

| Cause level | Cause                                                                         | Cause of death | Cause of burden |
|-------------|-------------------------------------------------------------------------------|----------------|-----------------|
| 0           | All causes                                                                    | X              | X               |
| 1           | Communicable, maternal, neonatal, and nutritional diseases                    | X              | X               |
| 2           | HIV/AIDS and sexually transmitted infections                                  | X              | X               |
| 3           | HIV/AIDS                                                                      | X              | X               |
| 4           | HIV/AIDS - Drug-susceptible Tuberculosis                                      | X              | X               |
| 4           | HIV/AIDS - Multidrug-resistant Tuberculosis without extensive drug resistance | X              | X               |
| 4           | HIV/AIDS - Extensively drug-resistant Tuberculosis                            | X              | X               |
| 4           | HIV/AIDS resulting in other diseases                                          | X              | X               |
| 3           | Sexually transmitted infections excluding HIV                                 | X              | X               |
| 4           | Syphilis                                                                      | X              | X               |
| 4           | Chlamydial infection                                                          | X              | X               |
| 4           | Gonococcal infection                                                          | X              | X               |
| 4           | Trichomoniasis                                                                |                | X               |
| 4           | Genital herpes                                                                |                | X               |
| 4           | Other sexually transmitted infections                                         | X              | X               |
| 2           | Respiratory infections and tuberculosis                                       | X              | X               |
| 3           | Tuberculosis                                                                  | X              | X               |
| 4           | Latent tuberculosis infection                                                 |                | X               |
| 4           | Drug-susceptible tuberculosis                                                 | X              | X               |
| 4           | Multidrug-resistant tuberculosis without extensive drug resistance            | X              | X               |
| 4           | Extensively drug-resistant tuberculosis                                       | X              | X               |
| 3           | Lower respiratory infections                                                  | X              | X               |
| 3           | Upper respiratory infections                                                  | X              | X               |
| 3           | Otitis media                                                                  | X              | X               |
| 2           | Enteric infections                                                            | X              | X               |
| 3           | Diarrheal diseases                                                            | X              | X               |
| 3           | Typhoid and paratyphoid                                                       | X              | X               |
| 4           | Typhoid fever                                                                 | X              | X               |
| 4           | Paratyphoid fever                                                             | X              | X               |
| 3           | Invasive Non-typhoidal Salmonella (iNTS)                                      | X              | X               |
| 3           | Other intestinal infectious diseases                                          | X              | X               |
| 2           | Neglected tropical diseases and malaria                                       | X              | X               |
| 3           | Malaria                                                                       | X              | X               |
| 3           | Chagas disease                                                                | X              | X               |
| 3           | Leishmaniasis                                                                 | X              | X               |
| 4           | Visceral leishmaniasis                                                        | X              | X               |
| 4           | Cutaneous and mucocutaneous leishmaniasis                                     |                | X               |
| 3           | African trypanosomiasis                                                       | X              | X               |
| 3           | Schistosomiasis                                                               | X              | X               |
| 3           | Cysticercosis                                                                 | X              | X               |
| 3           | Cystic echinococcosis                                                         | X              | X               |
| 3           | Lymphatic filariasis                                                          |                | X               |
| 3           | Onchocerciasis                                                                |                | X               |
| 3           | Trachoma                                                                      |                | X               |

**Appendix Table 13. Causes included in the 2017 Global Burden of Disease Study**

| Cause level | Cause                                         | Cause of death | Cause of burden |
|-------------|-----------------------------------------------|----------------|-----------------|
| 3           | Dengue                                        | X              | X               |
| 3           | Yellow fever                                  | X              | X               |
| 3           | Rabies                                        | X              | X               |
| 3           | Intestinal nematode infections                | X              | X               |
| 4           | Ascariasis                                    | X              | X               |
| 4           | Trichuriasis                                  |                | X               |
| 4           | Hookworm disease                              |                | X               |
| 3           | Food-borne trematodiasis                      |                | X               |
| 3           | Leprosy                                       |                | X               |
| 3           | Ebola                                         | X              | X               |
| 3           | Zika virus                                    | X              | X               |
| 3           | Guinea worm disease                           |                | X               |
| 3           | Other neglected tropical diseases             | X              | X               |
| 2           | Other infectious diseases                     | X              | X               |
| 3           | Meningitis                                    | X              | X               |
| 4           | Pneumococcal meningitis                       | X              | X               |
| 4           | H influenzae type B meningitis                | X              | X               |
| 4           | Meningococcal meningitis                      | X              | X               |
| 4           | Other meningitis                              | X              | X               |
| 3           | Encephalitis                                  | X              | X               |
| 3           | Diphtheria                                    | X              | X               |
| 3           | Whooping cough                                | X              | X               |
| 3           | Tetanus                                       | X              | X               |
| 3           | Measles                                       | X              | X               |
| 3           | Varicella and herpes zoster                   | X              | X               |
| 3           | Acute hepatitis                               | X              | X               |
| 4           | Acute hepatitis A                             | X              | X               |
| 4           | Acute hepatitis B                             | X              | X               |
| 4           | Acute hepatitis C                             | X              | X               |
| 4           | Acute hepatitis E                             | X              | X               |
| 3           | Other unspecified infectious diseases         | X              | X               |
| 2           | Maternal and neonatal disorders               | X              | X               |
| 3           | Maternal disorders                            | X              | X               |
| 4           | Maternal hemorrhage                           | X              | X               |
| 4           | Maternal sepsis and other maternal infections | X              | X               |
| 4           | Maternal hypertensive disorders               | X              | X               |
| 4           | Maternal obstructed labor and uterine rupture | X              | X               |
| 4           | Maternal abortion and miscarriage             | X              | X               |
| 4           | Ectopic pregnancy                             | X              | X               |
| 4           | Indirect maternal deaths                      | X              |                 |
| 4           | Late maternal deaths                          | X              |                 |
| 4           | Maternal deaths aggravated by HIV/AIDS        | X              |                 |
| 4           | Other maternal disorders                      | X              | X               |
| 3           | Neonatal disorders                            | X              | X               |
| 4           | Neonatal preterm birth                        | X              | X               |

**Appendix Table 13. Causes included in the 2017 Global Burden of Disease Study**

| Cause level | Cause                                                    | Cause of death | Cause of burden |
|-------------|----------------------------------------------------------|----------------|-----------------|
| 4           | Neonatal encephalopathy due to birth asphyxia and trauma | X              | X               |
| 4           | Neonatal sepsis and other neonatal infections            | X              | X               |
| 4           | Hemolytic disease and other neonatal jaundice            | X              | X               |
| 4           | Other neonatal disorders                                 | X              | X               |
| 2           | Nutritional deficiencies                                 | X              | X               |
| 3           | Protein-energy malnutrition                              | X              | X               |
| 3           | Iodine deficiency                                        |                | X               |
| 3           | Vitamin A deficiency                                     |                | X               |
| 3           | Dietary iron deficiency                                  |                | X               |
| 3           | Other nutritional deficiencies                           | X              | X               |
| 1           | Non-communicable diseases                                | X              | X               |
| 2           | Neoplasms                                                | X              | X               |
| 3           | Lip and oral cavity cancer                               | X              | X               |
| 3           | Nasopharynx cancer                                       | X              | X               |
| 3           | Other pharynx cancer                                     | X              | X               |
| 3           | Esophageal cancer                                        | X              | X               |
| 3           | Stomach cancer                                           | X              | X               |
| 3           | Colon and rectum cancer                                  | X              | X               |
| 3           | Liver cancer                                             | X              | X               |
| 4           | Liver cancer due to hepatitis B                          | X              | X               |
| 4           | Liver cancer due to hepatitis C                          | X              | X               |
| 4           | Liver cancer due to alcohol use                          | X              | X               |
| 4           | Liver cancer due to NASH                                 | X              | X               |
| 4           | Liver cancer due to other causes                         | X              | X               |
| 3           | Gallbladder and biliary tract cancer                     | X              | X               |
| 3           | Pancreatic cancer                                        | X              | X               |
| 3           | Larynx cancer                                            | X              | X               |
| 3           | Tracheal, bronchus, and lung cancer                      | X              | X               |
| 3           | Malignant skin melanoma                                  | X              | X               |
| 3           | Non-melanoma skin cancer                                 | X              | X               |
| 4           | Non-melanoma skin cancer (squamous-cell carcinoma)       | X              | X               |
| 4           | Non-melanoma skin cancer (basal-cell carcinoma)          |                | X               |
| 3           | Breast cancer                                            | X              | X               |
| 3           | Cervical cancer                                          | X              | X               |
| 3           | Uterine cancer                                           | X              | X               |
| 3           | Ovarian cancer                                           | X              | X               |
| 3           | Prostate cancer                                          | X              | X               |
| 3           | Testicular cancer                                        | X              | X               |
| 3           | Kidney cancer                                            | X              | X               |
| 3           | Bladder cancer                                           | X              | X               |
| 3           | Brain and nervous system cancer                          | X              | X               |
| 3           | Thyroid cancer                                           | X              | X               |
| 3           | Mesothelioma                                             | X              | X               |
| 3           | Hodgkin lymphoma                                         | X              | X               |
| 3           | Non-Hodgkin lymphoma                                     | X              | X               |



**Appendix Table 13. Causes included in the 2017 Global Burden of Disease Study**

| Cause level | Cause                                                                  | Cause of death | Cause of burden |
|-------------|------------------------------------------------------------------------|----------------|-----------------|
| 3           | Multiple myeloma                                                       | X              | X               |
| 3           | Leukemia                                                               | X              | X               |
| 4           | Acute lymphoid leukemia                                                | X              | X               |
| 4           | Chronic lymphoid leukemia                                              | X              | X               |
| 4           | Acute myeloid leukemia                                                 | X              | X               |
| 4           | Chronic myeloid leukemia                                               | X              | X               |
| 4           | Other leukemia                                                         | X              | X               |
| 3           | Other malignant neoplasms                                              | X              | X               |
| 3           | Other neoplasms                                                        | X              | X               |
| 4           | Myelodysplastic, myeloproliferative, and other hematopoietic neoplasms | X              | X               |
| 4           | Benign and in situ intestinal neoplasms                                |                | X               |
| 4           | Benign and in situ cervical and uterine neoplasms                      |                | X               |
| 4           | Other benign and in situ neoplasms                                     | X              | X               |
| 2           | Cardiovascular diseases                                                | X              | X               |
| 3           | Rheumatic heart disease                                                | X              | X               |
| 3           | Ischemic heart disease                                                 | X              | X               |
| 3           | Stroke                                                                 | X              | X               |
| 4           | Ischemic stroke                                                        | X              | X               |
| 4           | Intracerebral hemorrhage                                               | X              | X               |
| 4           | Subarachnoid hemorrhage                                                | X              | X               |
| 3           | Hypertensive heart disease                                             | X              | X               |
| 3           | Non-rheumatic valvular heart disease                                   | X              | X               |
| 4           | Non-rheumatic calcific aortic valve disease                            | X              | X               |
| 4           | Non-rheumatic degenerative mitral valve disease                        | X              | X               |
| 4           | Other non-rheumatic valve diseases                                     | X              | X               |
| 3           | Cardiomyopathy and myocarditis                                         | X              | X               |
| 4           | Myocarditis                                                            | X              | X               |
| 4           | Alcoholic cardiomyopathy                                               | X              | X               |
| 4           | Other cardiomyopathy                                                   | X              | X               |
| 3           | Atrial fibrillation and flutter                                        | X              | X               |
| 3           | Aortic aneurysm                                                        | X              |                 |
| 3           | Peripheral artery disease                                              | X              | X               |
| 3           | Endocarditis                                                           | X              | X               |
| 3           | Other cardiovascular and circulatory diseases                          | X              | X               |
| 2           | Chronic respiratory diseases                                           | X              | X               |
| 3           | Chronic obstructive pulmonary disease                                  | X              | X               |
| 3           | Pneumoconiosis                                                         | X              | X               |
| 4           | Silicosis                                                              | X              | X               |
| 4           | Asbestosis                                                             | X              | X               |
| 4           | Coal workers pneumoconiosis                                            | X              | X               |
| 4           | Other pneumoconiosis                                                   | X              | X               |
| 3           | Asthma                                                                 | X              | X               |
| 3           | Interstitial lung disease and pulmonary sarcoidosis                    | X              | X               |
| 3           | Other chronic respiratory diseases                                     | X              | X               |

**Appendix Table 13. Causes included in the 2017 Global Burden of Disease Study**

| Cause level | Cause                                                          | Cause of death | Cause of burden |
|-------------|----------------------------------------------------------------|----------------|-----------------|
| 2           | Digestive diseases                                             | X              | X               |
| 3           | Cirrhosis and other chronic liver diseases                     | X              | X               |
| 4           | Cirrhosis and other chronic liver diseases due to hepatitis B  | X              | X               |
| 4           | Cirrhosis and other chronic liver diseases due to hepatitis C  | X              | X               |
| 4           | Cirrhosis and other chronic liver diseases due to alcohol use  | X              | X               |
| 4           | Cirrhosis due to NASH                                          | X              | X               |
| 4           | Cirrhosis and other chronic liver diseases due to other causes | X              | X               |
| 3           | Upper digestive system diseases                                | X              | X               |
| 4           | Peptic ulcer disease                                           | X              | X               |
| 4           | Gastritis and duodenitis                                       | X              | X               |
| 4           | Gastroesophageal reflux disease                                |                | X               |
| 3           | Appendicitis                                                   | X              | X               |
| 3           | Paralytic ileus and intestinal obstruction                     | X              | X               |
| 3           | Inguinal, femoral, and abdominal hernia                        | X              | X               |
| 3           | Inflammatory bowel disease                                     | X              | X               |
| 3           | Vascular intestinal disorders                                  | X              | X               |
| 3           | Gallbladder and biliary diseases                               | X              | X               |
| 3           | Pancreatitis                                                   | X              | X               |
| 3           | Other digestive diseases                                       | X              | X               |
| 2           | Neurological disorders                                         | X              | X               |
| 3           | Alzheimer's disease and other dementias                        | X              | X               |
| 3           | Parkinson's disease                                            | X              | X               |
| 3           | Epilepsy                                                       | X              | X               |
| 3           | Multiple sclerosis                                             | X              | X               |
| 3           | Motor neuron disease                                           | X              | X               |
| 3           | Headache disorders                                             |                | X               |
| 4           | Migraine                                                       |                | X               |
| 4           | Tension-type headache                                          |                | X               |
| 3           | Other neurological disorders                                   | X              | X               |
| 2           | Mental disorders                                               | X              | X               |
| 3           | Schizophrenia                                                  |                | X               |
| 3           | Depressive disorders                                           |                | X               |
| 4           | Major depressive disorder                                      |                | X               |
| 4           | Dysthymia                                                      |                | X               |
| 3           | Bipolar disorder                                               |                | X               |
| 3           | Anxiety disorders                                              |                | X               |
| 3           | Eating disorders                                               | X              | X               |
| 4           | Anorexia nervosa                                               | X              | X               |
| 4           | Bulimia nervosa                                                | X              | X               |
| 3           | Autism spectrum disorders                                      |                | X               |
| 3           | Attention-deficit/hyperactivity disorder                       |                | X               |
| 3           | Conduct disorder                                               |                | X               |
| 3           | Idiopathic developmental intellectual disability               |                | X               |
| 3           | Other mental disorders                                         |                | X               |
| 2           | Substance use disorders                                        | X              | X               |

**Appendix Table 13. Causes included in the 2017 Global Burden of Disease Study**

| Cause level | Cause                                                      | Cause of death | Cause of burden |
|-------------|------------------------------------------------------------|----------------|-----------------|
| 3           | Alcohol use disorders                                      | X              | X               |
| 3           | Drug use disorders                                         | X              | X               |
| 4           | Opioid use disorders                                       | X              | X               |
| 4           | Cocaine use disorders                                      | X              | X               |
| 4           | Amphetamine use disorders                                  | X              | X               |
| 4           | Cannabis use disorders                                     |                | X               |
| 4           | Other drug use disorders                                   | X              | X               |
| 2           | Diabetes and kidney diseases                               | X              | X               |
| 3           | Diabetes mellitus                                          | X              | X               |
| 4           | Diabetes mellitus type 1                                   | X              | X               |
| 4           | Diabetes mellitus type 2                                   | X              | X               |
| 3           | Chronic kidney disease                                     | X              | X               |
| 4           | Chronic kidney disease due to diabetes mellitus type 1     | X              | X               |
| 4           | Chronic kidney disease due to diabetes mellitus type 2     | X              | X               |
| 4           | Chronic kidney disease due to hypertension                 | X              | X               |
| 4           | Chronic kidney disease due to glomerulonephritis           | X              | X               |
| 4           | Chronic kidney disease due to other and unspecified causes | X              | X               |
| 3           | Acute glomerulonephritis                                   | X              | X               |
| 2           | Skin and subcutaneous diseases                             | X              | X               |
| 3           | Dermatitis                                                 |                | X               |
| 4           | Atopic dermatitis                                          |                | X               |
| 4           | Contact dermatitis                                         |                | X               |
| 4           | Seborrhoeic dermatitis                                     |                | X               |
| 3           | Psoriasis                                                  |                | X               |
| 3           | Bacterial skin diseases                                    | X              | X               |
| 4           | Cellulitis                                                 | X              | X               |
| 4           | Pyoderma                                                   | X              | X               |
| 3           | Scabies                                                    |                | X               |
| 3           | Fungal skin diseases                                       |                | X               |
| 3           | Viral skin diseases                                        |                | X               |
| 3           | Acne vulgaris                                              |                | X               |
| 3           | Alopecia areata                                            |                | X               |
| 3           | Pruritus                                                   |                | X               |
| 3           | Urticaria                                                  |                | X               |
| 3           | Decubitus ulcer                                            | X              | X               |
| 3           | Other skin and subcutaneous diseases                       | X              | X               |
| 2           | Sense organ diseases                                       |                | X               |
| 3           | Blindness and vision impairment                            |                | X               |
| 4           | Glaucoma                                                   |                | X               |
| 4           | Cataract                                                   |                | X               |
| 4           | Age-related macular degeneration                           |                | X               |
| 4           | Refraction disorders                                       |                | X               |
| 4           | Near vision loss                                           |                | X               |
| 4           | Other vision loss                                          |                | X               |
| 3           | Age-related and other hearing loss                         |                | X               |

**Appendix Table 13. Causes included in the 2017 Global Burden of Disease Study**

| Cause level | Cause                                             | Cause of death | Cause of burden |
|-------------|---------------------------------------------------|----------------|-----------------|
| 3           | Other sense organ diseases                        |                | X               |
| 2           | Musculoskeletal disorders                         | X              | X               |
| 3           | Rheumatoid arthritis                              | X              | X               |
| 3           | Osteoarthritis                                    |                | X               |
| 3           | Low back pain                                     |                | X               |
| 3           | Neck pain                                         |                | X               |
| 3           | Gout                                              |                | X               |
| 3           | Other musculoskeletal disorders                   | X              | X               |
| 2           | Other non-communicable diseases                   | X              | X               |
| 3           | Congenital birth defects                          | X              | X               |
| 4           | Neural tube defects                               | X              | X               |
| 4           | Congenital heart anomalies                        | X              | X               |
| 4           | Orofacial clefts                                  | X              | X               |
| 4           | Down syndrome                                     | X              | X               |
| 4           | Turner syndrome                                   |                | X               |
| 4           | Klinefelter syndrome                              |                | X               |
| 4           | Other chromosomal abnormalities                   | X              | X               |
| 4           | Congenital musculoskeletal and limb anomalies     | X              | X               |
| 4           | Urogenital congenital anomalies                   | X              | X               |
| 4           | Digestive congenital anomalies                    | X              | X               |
| 4           | Other congenital birth defects                    | X              | X               |
| 3           | Urinary diseases and male infertility             | X              | X               |
| 4           | Urinary tract infections                          | X              | X               |
| 4           | Urolithiasis                                      | X              | X               |
| 4           | Benign prostatic hyperplasia                      |                | X               |
| 4           | Male infertility                                  |                | X               |
| 4           | Other urinary diseases                            | X              | X               |
| 3           | Gynecological diseases                            | X              | X               |
| 4           | Uterine fibroids                                  | X              | X               |
| 4           | Polycystic ovarian syndrome                       | X              | X               |
| 4           | Female infertility                                |                | X               |
| 4           | Endometriosis                                     | X              | X               |
| 4           | Genital prolapse                                  | X              | X               |
| 4           | Premenstrual syndrome                             |                | X               |
| 4           | Other gynecological diseases                      | X              | X               |
| 3           | Hemoglobinopathies and hemolytic anemias          | X              | X               |
| 4           | Thalassemias                                      | X              | X               |
| 4           | Thalassemias trait                                |                | X               |
| 4           | Sickle cell disorders                             | X              | X               |
| 4           | Sickle cell trait                                 |                | X               |
| 4           | G6PD deficiency                                   | X              | X               |
| 4           | G6PD trait                                        |                | X               |
| 4           | Other hemoglobinopathies and hemolytic anemias    | X              | X               |
| 3           | Endocrine, metabolic, blood, and immune disorders | X              | X               |
| 3           | Oral disorders                                    |                | X               |

**Appendix Table 13. Causes included in the 2017 Global Burden of Disease Study**

| Cause level | Cause                                           | Cause of death | Cause of burden |
|-------------|-------------------------------------------------|----------------|-----------------|
| 4           | Caries of deciduous teeth                       |                | X               |
| 4           | Caries of permanent teeth                       |                | X               |
| 4           | Periodontal diseases                            |                | X               |
| 4           | Edentulism and severe tooth loss                |                | X               |
| 4           | Other oral disorders                            |                | X               |
| 3           | Sudden infant death syndrome                    | X              |                 |
| 1           | Injuries                                        | X              | X               |
| 2           | Transport injuries                              | X              | X               |
| 3           | Road injuries                                   | X              | X               |
| 4           | Pedestrian road injuries                        | X              | X               |
| 4           | Cyclist road injuries                           | X              | X               |
| 4           | Motorcyclist road injuries                      | X              | X               |
| 4           | Motor vehicle road injuries                     | X              | X               |
| 4           | Other road injuries                             | X              | X               |
| 3           | Other transport injuries                        | X              | X               |
| 2           | Unintentional injuries                          | X              | X               |
| 3           | Falls                                           | X              | X               |
| 3           | Drowning                                        | X              | X               |
| 3           | Fire, heat, and hot substances                  | X              | X               |
| 3           | Poisonings                                      | X              | X               |
| 4           | Poisoning by carbon monoxide                    | X              | X               |
| 4           | Poisoning by other means                        | X              | X               |
| 3           | Exposure to mechanical forces                   | X              | X               |
| 4           | Unintentional firearm injuries                  | X              | X               |
| 4           | Other exposure to mechanical forces             | X              | X               |
| 3           | Adverse effects of medical treatment            | X              | X               |
| 3           | Animal contact                                  | X              | X               |
| 4           | Venomous animal contact                         | X              | X               |
| 4           | Non-venomous animal contact                     | X              | X               |
| 3           | Foreign body                                    | X              | X               |
| 4           | Pulmonary aspiration and foreign body in airway | X              | X               |
| 4           | Foreign body in eyes                            |                | X               |
| 4           | Foreign body in other body part                 | X              | X               |
| 3           | Environmental heat and cold exposure            | X              | X               |
| 3           | Exposure to forces of nature                    | X              | X               |
| 3           | Other unintentional injuries                    | X              | X               |
| 2           | Self-harm and interpersonal violence            | X              | X               |
| 3           | Self-harm                                       | X              | X               |
| 4           | Self-harm by firearm                            | X              | X               |
| 4           | Self-harm by other specified means              | X              | X               |
| 3           | Interpersonal violence                          | X              | X               |
| 4           | Physical violence by firearm                    | X              | X               |
| 4           | Physical violence by sharp object               | X              | X               |
| 4           | Sexual violence                                 |                | X               |
| 4           | Physical violence by other means                | X              | X               |

**Appendix Table 13. Causes included in the 2017 Global Burden of Disease Study**

| Cause level | Cause                          | Cause of death | Cause of burden |
|-------------|--------------------------------|----------------|-----------------|
| 3           | Conflict and terrorism         | X              | X               |
| 3           | Executions and police conflict | X              | X               |

**Appendix Table 14. CoDCorrect cause hierarchy with levels**

| Cause Name                                                         | CoDCorrect Level |
|--------------------------------------------------------------------|------------------|
| All causes                                                         | 0                |
| Sexually transmitted infections excluding HIV                      | 1                |
| Syphilis                                                           | 2                |
| Chlamydial infection                                               | 2                |
| Gonococcal infection                                               | 2                |
| Other sexually transmitted infections                              | 2                |
| Tuberculosis                                                       | 1                |
| Drug-susceptible tuberculosis                                      | 2                |
| Multidrug-resistant tuberculosis without extensive drug resistance | 2                |
| Extensively drug-resistant tuberculosis                            | 2                |
| Lower respiratory infections                                       | 1                |
| Upper respiratory infections                                       | 1                |
| Otitis media                                                       | 1                |
| Diarrhoeal diseases                                                | 1                |
| Typhoid fever                                                      | 1                |
| Paratyphoid fever                                                  | 1                |
| iNTS                                                               | 1                |
| Other intestinal infectious diseases                               | 1                |
| Malaria                                                            | 1                |
| Chagas disease                                                     | 1                |
| Visceral leishmaniasis                                             | 1                |
| African trypanosomiasis                                            | 1                |
| Schistosomiasis                                                    | 1                |
| Cysticercosis                                                      | 1                |
| Cystic echinococcosis                                              | 1                |
| Dengue                                                             | 1                |
| Yellow fever                                                       | 1                |
| Rabies                                                             | 1                |
| Intestinal nematode infections                                     | 1                |
| Ascariasis                                                         | 2                |
| Zika virus disease                                                 | 1                |
| Other neglected tropical diseases                                  | 1                |
| Meningitis                                                         | 1                |
| Pneumococcal meningitis                                            | 2                |
| H influenzae type B meningitis                                     | 2                |
| Meningococcal infection                                            | 2                |
| Other meningitis                                                   | 2                |
| Encephalitis                                                       | 1                |
| Diphtheria                                                         | 1                |
| Whooping cough                                                     | 1                |
| Tetanus                                                            | 1                |
| Measles                                                            | 1                |
| Varicella and herpes zoster                                        | 1                |
| Acute hepatitis                                                    | 1                |

**Appendix Table 14. CoDCorrect cause hierarchy with levels**

| Cause Name                                               | CoDCorrect Level |
|----------------------------------------------------------|------------------|
| Acute hepatitis A                                        | 2                |
| Acute hepatitis B                                        | 2                |
| Acute hepatitis C                                        | 2                |
| Acute hepatitis E                                        | 2                |
| Other unspecified infectious diseases                    | 1                |
| Maternal disorders                                       | 1                |
| Maternal haemorrhage                                     | 2                |
| Maternal sepsis and other pregnancy related infections   | 2                |
| Maternal hypertensive disorders                          | 2                |
| Maternal obstructed labour and uterine rupture           | 2                |
| Maternal abortive outcome                                | 2                |
| Ectopic pregnancy                                        | 2                |
| Indirect maternal deaths                                 | 2                |
| Late maternal deaths                                     | 2                |
| Maternal deaths aggravated by HIV/AIDS                   | 2                |
| Other maternal disorders                                 | 2                |
| Neonatal disorders                                       | 1                |
| Neonatal preterm birth                                   | 2                |
| Neonatal encephalopathy due to birth asphyxia and trauma | 2                |
| Neonatal sepsis and other neonatal infections            | 2                |
| Hemolytic disease and other neonatal jaundice            | 2                |
| Other neonatal disorders                                 | 2                |
| Nutritional deficiencies                                 | 1                |
| Protein-energy malnutrition                              | 2                |
| Other nutritional deficiencies                           | 2                |
| Lip and oral cavity cancer                               | 1                |
| Nasopharynx cancer                                       | 1                |
| Other pharynx cancer                                     | 1                |
| Oesophageal cancer                                       | 1                |
| Stomach cancer                                           | 1                |
| Colon and rectum cancer                                  | 1                |
| Liver cancer                                             | 1                |
| Liver cancer due to hepatitis B                          | 2                |
| Liver cancer due to hepatitis C                          | 2                |
| Liver cancer due to alcohol use                          | 2                |
| Liver cancer due to NASH                                 | 2                |
| Liver cancer due to other causes                         | 2                |
| Gallbladder and biliary tract cancer                     | 1                |
| Pancreatic cancer                                        | 1                |
| Larynx cancer                                            | 1                |
| Tracheal, bronchus, and lung cancer                      | 1                |
| Malignant skin melanoma                                  | 1                |
| Non-melanoma skin cancer (squamous-cell carcinoma)       | 1                |



**Appendix Table 14. CoDCorrect cause hierarchy with levels**

| Cause Name                                                             | CoDCorrect Level |
|------------------------------------------------------------------------|------------------|
| Breast cancer                                                          | 1                |
| Cervical cancer                                                        | 1                |
| Uterine cancer                                                         | 1                |
| Ovarian cancer                                                         | 1                |
| Prostate cancer                                                        | 1                |
| Testicular cancer                                                      | 1                |
| Kidney cancer                                                          | 1                |
| Bladder cancer                                                         | 1                |
| Brain and nervous system cancer                                        | 1                |
| Thyroid cancer                                                         | 1                |
| Mesothelioma                                                           | 1                |
| Hodgkin lymphoma                                                       | 1                |
| Non-Hodgkin's lymphoma                                                 | 1                |
| Multiple myeloma                                                       | 1                |
| Leukaemia                                                              | 1                |
| Acute lymphoid leukaemia                                               | 2                |
| Chronic lymphoid leukaemia                                             | 2                |
| Acute myeloid leukaemia                                                | 2                |
| Chronic myeloid leukaemia                                              | 2                |
| Other leukaemia                                                        | 2                |
| Other malignant cancers                                                | 1                |
| Other neoplasms                                                        | 1                |
| Myelodysplastic, myeloproliferative, and other hematopoietic neoplasms | 2                |
| Other benign and in situ neoplasms                                     | 2                |
| Cardiovascular diseases                                                | 1                |
| Rheumatic heart disease                                                | 2                |
| Ischaemic heart disease                                                | 2                |
| Stroke                                                                 | 2                |
| Ischaemic stroke                                                       | 3                |
| Intracerebral hemorrhage                                               | 3                |
| Subarachnoid hemorrhage                                                | 3                |
| Hypertensive heart disease                                             | 2                |
| Non-rheumatic valvular heart disease                                   | 2                |
| Non-rheumatic calcific aortic valve disease                            | 3                |
| Non-rheumatic degenerative mitral valve disease                        | 3                |
| Other non-rheumatic valve diseases                                     | 3                |
| Cardiomyopathy and myocarditis                                         | 2                |
| Myocarditis                                                            | 3                |
| Alcoholic cardiomyopathy                                               | 3                |
| Other cardiomyopathy                                                   | 3                |
| Atrial fibrillation and flutter                                        | 2                |
| Aortic aneurysm                                                        | 2                |
| Peripheral vascular disease                                            | 2                |
| Endocarditis                                                           | 2                |

**Appendix Table 14. CoDCorrect cause hierarchy with levels**

| Cause Name                                                     | CoDCorrect Level |
|----------------------------------------------------------------|------------------|
| Other cardiovascular and circulatory diseases                  | 2                |
| Chronic respiratory diseases                                   | 1                |
| Chronic obstructive pulmonary disease                          | 2                |
| Pneumoconiosis                                                 | 2                |
| Silicosis                                                      | 3                |
| Asbestosis                                                     | 3                |
| Coal workers pneumoconiosis                                    | 3                |
| Other pneumoconiosis                                           | 3                |
| Asthma                                                         | 2                |
| Interstitial lung disease and pulmonary sarcoidosis            | 2                |
| Other chronic respiratory diseases                             | 2                |
| Digestive diseases                                             | 1                |
| Cirrhosis and other chronic liver diseases                     | 2                |
| Cirrhosis and other chronic liver diseases due to hepatitis B  | 3                |
| Cirrhosis and other chronic liver diseases due to hepatitis C  | 3                |
| Cirrhosis and other chronic liver diseases due to alcohol use  | 3                |
| Cirrhosis due to NASH                                          | 3                |
| Cirrhosis and other chronic liver diseases due to other causes | 3                |
| Upper digestive system diseases                                | 2                |
| Peptic ulcer disease                                           | 3                |
| Gastritis and duodenitis                                       | 3                |
| Appendicitis                                                   | 2                |
| Paralytic ileus and intestinal obstruction                     | 2                |
| Inguinal, femoral, and abdominal hernia                        | 2                |
| Inflammatory bowel disease                                     | 2                |
| Vascular intestinal disorders                                  | 2                |
| Gallbladder and biliary diseases                               | 2                |
| Pancreatitis                                                   | 2                |
| Other digestive diseases                                       | 2                |
| Alzheimer's disease and other dementias                        | 1                |
| Parkinson's disease                                            | 1                |
| Epilepsy                                                       | 1                |
| Multiple sclerosis                                             | 1                |
| Motor neuron disease                                           | 1                |
| Other neurological disorders                                   | 1                |
| Eating disorders                                               | 1                |
| Anorexia nervosa                                               | 2                |
| Bulimia nervosa                                                | 2                |
| Alcohol use disorders                                          | 1                |
| Drug use disorders                                             | 1                |
| Opioid use disorders                                           | 2                |
| Cocaine use disorders                                          | 2                |

**Appendix Table 14. CoDCorrect cause hierarchy with levels**

| Cause Name                                                 | CoDCorrect Level |
|------------------------------------------------------------|------------------|
| Amphetamine use disorders                                  | 2                |
| Other drug use disorders                                   | 2                |
| Diabetes mellitus                                          | 1                |
| Diabetes mellitus type 1                                   | 2                |
| Diabetes mellitus type 2                                   | 2                |
| Chronic kidney disease                                     | 1                |
| Chronic kidney disease due to diabetes mellitus type 1     | 2                |
| Chronic kidney disease due to diabetes mellitus type 2     | 2                |
| Chronic kidney disease due to hypertension                 | 2                |
| Chronic kidney disease due to glomerulonephritis           | 2                |
| Chronic kidney disease due to other and unspecified causes | 2                |
| Acute glomerulonephritis                                   | 1                |
| Skin and subcutaneous diseases                             | 1                |
| Bacterial skin diseases                                    | 2                |
| Cellulitis                                                 | 3                |
| Pyoderma                                                   | 3                |
| Decubitus ulcer                                            | 2                |
| Other skin and subcutaneous diseases                       | 2                |
| Musculoskeletal disorders                                  | 1                |
| Rheumatoid arthritis                                       | 2                |
| Other musculoskeletal disorders                            | 2                |
| Congenital anomalies                                       | 1                |
| Neural tube defects                                        | 2                |
| Congenital heart anomalies                                 | 2                |
| Orofacial clefts                                           | 2                |
| Down's syndrome                                            | 2                |
| Other chromosomal abnormalities                            | 2                |
| Congenital musculoskeletal and limb anomalies              | 2                |
| Urogenital congenital anomalies                            | 2                |
| Digestive congenital anomalies                             | 2                |
| Other congenital anomalies                                 | 2                |
| Urinary diseases and male infertility                      | 1                |
| Urinary tract infections                                   | 2                |
| Urolithiasis                                               | 2                |
| Other urinary diseases                                     | 2                |
| Gynecological diseases                                     | 1                |
| Uterine fibroids                                           | 2                |
| Polycystic ovarian syndrome                                | 2                |
| Endometriosis                                              | 2                |
| Genital prolapse                                           | 2                |
| Other gynecological diseases                               | 2                |
| Hemoglobinopathies and hemolytic anaemias                  | 1                |
| Thalassemias                                               | 2                |

**Appendix Table 14. CoDCorrect cause hierarchy with levels**

| Cause Name                                        | CoDCorrect Level |
|---------------------------------------------------|------------------|
| Sickle cell disorders                             | 2                |
| G6PD deficiency                                   | 2                |
| Other hemoglobinopathies and hemolytic anaemias   | 2                |
| Endocrine, metabolic, blood, and immune disorders | 1                |
| Sudden infant death syndrome                      | 1                |
| Transport injuries                                | 1                |
| Road injuries                                     | 2                |
| Pedestrian road injuries                          | 3                |
| Cyclist road injuries                             | 3                |
| Motorcyclist road injuries                        | 3                |
| Motor vehicle road injuries                       | 3                |
| Other road injuries                               | 3                |
| Other transport injuries                          | 2                |
| Falls                                             | 1                |
| Drowning                                          | 1                |
| Fire, heat, and hot substances                    | 1                |
| Poisonings                                        | 1                |
| Poisoning by carbon monoxide                      | 2                |
| Poisoning by other means                          | 2                |
| Exposure to mechanical forces                     | 1                |
| Unintentional firearm injuries                    | 2                |
| Other exposure to mechanical forces               | 2                |
| Adverse effects of medical treatment              | 1                |
| Animal contact                                    | 1                |
| Venomous animal contact                           | 2                |
| Non-venomous animal contact                       | 2                |
| Foreign body                                      | 1                |
| Pulmonary aspiration and foreign body in airway   | 2                |
| Foreign body in other body part                   | 2                |
| Environmental heat and cold exposure              | 1                |
| Other unintentional injuries                      | 1                |
| Self-harm                                         | 1                |
| Self-harm by firearm                              | 2                |
| Self-harm by other specified means                | 2                |
| Interpersonal violence                            | 1                |
| Assault by firearm                                | 2                |
| Assault by sharp object                           | 2                |
| Assault by other means                            | 2                |
| Executions and police conflict                    | 1                |

**Appendix Table 15. Percent change after CoDCorrect by cause for all ages, both sexes, 2017**

| Cause name                                                  | CoDCorrect level | Percent change           |
|-------------------------------------------------------------|------------------|--------------------------|
| All causes                                                  | 0                | 3.37<br>1.86 to 4.99     |
| Communicable, maternal, neonatal, and nutritional disorders | 1                | 12.95<br>8.93 to 16.72   |
| Tuberculosis                                                | 3                | 4.61<br>1.41 to 7.88     |
| Diarrhoeal diseases                                         | 3                | 2.19<br>-3.03 to 7.45    |
| Typhoid fever                                               | 4                | -8.13<br>-16.29 to 1.1   |
| Paratyphoid fever                                           | 4                | -11.9<br>-20.15 to -2.06 |
| Other intestinal infectious diseases                        | 3                | 7.2<br>-0.97 to 17.22    |
| Lower respiratory infections                                | 3                | 3.36<br>1.06 to 5.9      |
| Upper respiratory infections                                | 3                | 5.21<br>1.02 to 9.93     |
| Otitis media                                                | 3                | 1.82<br>-2.3 to 6.42     |
| Meningitis                                                  | 3                | 6.05<br>0.59 to 11.13    |
| Pneumococcal meningitis                                     | 4                | 7.56<br>1.27 to 13.27    |
| H influenzae type B meningitis                              | 4                | 3.88<br>-0.63 to 8.38    |
| Meningococcal infection                                     | 4                | 7.07<br>0.42 to 13.14    |
| Other meningitis                                            | 4                | 6.58<br>0.76 to 12.16    |
| Encephalitis                                                | 3                | 0.09<br>-3.84 to 5.1     |
| Diphtheria                                                  | 3                | 11.65<br>-2.9 to 26.88   |
| Whooping cough                                              | 3                | 1.34<br>-8.76 to 13.04   |
| Tetanus                                                     | 3                | -1.07<br>-5.69 to 3.8    |
| Measles                                                     | 3                | 0.56<br>-7.73 to 11.15   |
| Varicella and herpes zoster                                 | 3                | 4.49<br>-0.19 to 9.47    |
| Neglected tropical diseases and malaria                     | 2                | 6.72<br>-1.62 to 14.84   |
| Malaria                                                     | 3                | 7.55<br>-1.59 to 16.9    |
| Chagas disease                                              | 3                | -0.02<br>-0.66 to 0.76   |
| Leishmaniasis                                               | 3                | -1.81<br>-7.94 to 12.87  |
| Visceral leishmaniasis                                      | 4                | -1.81<br>-7.94 to 12.87  |
| African trypanosomiasis                                     | 3                | -6.44<br>-19.36 to 9.93  |
| Schistosomiasis                                             | 3                | 8.75<br>4.47 to 13.58    |
| Cysticercosis                                               | 3                | 4.72<br>-0.35 to 9.7     |
| Cystic echinococcosis                                       | 3                | 5.46<br>2.11 to 9.01     |
| Dengue                                                      | 3                | -1.02<br>-5.42 to 4.08   |

**Appendix Table 15. Percent change after CoDCorrect by cause for all ages, both sexes, 2017**

| Cause name                                               | CoDCorrect level | Percent change             |
|----------------------------------------------------------|------------------|----------------------------|
| Yellow fever                                             | 3                | 2.29<br>-4.3 to 11.52      |
| Rabies                                                   | 3                | 1.47<br>-3.63 to 7.04      |
| Intestinal nematode infections                           | 3                | 12.08<br>-0.2 to 23.8      |
| Ascariasis                                               | 4                | 12.21<br>-0.09 to 23.92    |
| Other neglected tropical diseases                        | 3                | 9.19<br>1.15 to 18.77      |
| Maternal disorders                                       | 3                | -0.69<br>-5.32 to 4.01     |
| Maternal haemorrhage                                     | 4                | -3.82<br>-11.75 to 4.86    |
| Maternal sepsis and other pregnancy related infections   | 4                | -0.84<br>-7.25 to 6.17     |
| Maternal hypertensive disorders                          | 4                | 1.94<br>-6.75 to 12.18     |
| Maternal obstructed labour and uterine rupture           | 4                | -1.81<br>-10.46 to 9.03    |
| Ectopic pregnancy                                        | 4                | 1.97<br>-6.56 to 10.75     |
| Indirect maternal deaths                                 | 4                | 0.0<br>-6.81 to 7.37       |
| Late maternal deaths                                     | 4                | 0.38<br>-5.12 to 6.67      |
| Other maternal disorders                                 | 4                | 2.13<br>-3.32 to 8.64      |
| Neonatal disorders                                       | 3                | -0.74<br>-5.41 to 3.92     |
| Neonatal preterm birth                                   | 4                | 5.85<br>-0.13 to 13.13     |
| Neonatal encephalopathy due to birth asphyxia and trauma | 4                | 7.3<br>-0.19 to 15.42      |
| Neonatal sepsis and other neonatal infections            | 4                | -1.93<br>-9.81 to 5.65     |
| Hemolytic disease and other neonatal jaundice            | 4                | 6.14<br>-3.94 to 14.5      |
| Other neonatal disorders                                 | 4                | 2.58<br>-4.65 to 9.32      |
| Nutritional deficiencies                                 | 2                | 6.99<br>1.57 to 12.34      |
| Protein-energy malnutrition                              | 3                | -1.96<br>-27.33 to 13.37   |
| Other nutritional deficiencies                           | 3                | 4.15<br>-9.54 to 24.04     |
| Sexually transmitted infections excluding HIV            | 3                | 1.27<br>-3.67 to 7.06      |
| Syphilis                                                 | 4                | 1.19<br>-3.81 to 7.33      |
| Chlamydial infection                                     | 4                | 2.81<br>-0.55 to 5.97      |
| Gonococcal infection                                     | 4                | 2.89<br>-0.35 to 5.92      |
| Other sexually transmitted infections                    | 4                | 2.71<br>-0.7 to 5.8        |
| Acute hepatitis                                          | 3                | 2.17<br>-1.38 to 6.32      |
| Acute hepatitis A                                        | 4                | 357.38<br>225.42 to 531.8  |
| Acute hepatitis B                                        | 4                | 560.28<br>370.46 to 757.68 |

**Appendix Table 15. Percent change after CoDCorrect by cause for all ages, both sexes, 2017**

| Cause name                            | CoDCorrect level | Percent change              |
|---------------------------------------|------------------|-----------------------------|
| Acute hepatitis C                     | 4                | 741.35<br>520.35 to 1042.73 |
| Acute hepatitis E                     | 4                | 776.24<br>498.41 to 1042.5  |
| Other unspecified infectious diseases | 3                | 4.43<br>1.22 to 8.9         |
| Non-communicable diseases             | 1                | 0.93<br>-0.23 to 2.27       |
| Neoplasms                             | 2                | 0.56<br>-0.4 to 1.87        |
| Oesophageal cancer                    | 3                | 0.55<br>-0.42 to 1.73       |
| Stomach cancer                        | 3                | 0.85<br>-0.01 to 1.99       |
| Liver cancer                          | 3                | 0.42<br>-0.44 to 1.61       |
| Liver cancer due to hepatitis B       | 4                | -0.73<br>-1.62 to 0.45      |
| Liver cancer due to hepatitis C       | 4                | 0.35<br>-0.5 to 1.29        |
| Liver cancer due to alcohol use       | 4                | 2.01<br>1.03 to 3.4         |
| Liver cancer due to other causes      | 4                | -0.39<br>-1.31 to 0.68      |
| Larynx cancer                         | 3                | 0.15<br>-1.57 to 1.67       |
| Tracheal, bronchus, and lung cancer   | 3                | 0.07<br>-0.69 to 1.05       |
| Breast cancer                         | 3                | 0.73<br>-0.99 to 2.43       |
| Cervical cancer                       | 3                | 2.21<br>-0.19 to 4.48       |
| Uterine cancer                        | 3                | 0.84<br>-0.66 to 2.49       |
| Prostate cancer                       | 3                | 0.9<br>-0.57 to 2.78        |
| Colon and rectum cancer               | 3                | 0.68<br>-0.31 to 1.99       |
| Lip and oral cavity cancer            | 3                | 0.06<br>-1.7 to 1.87        |
| Nasopharynx cancer                    | 3                | 0.77<br>-0.39 to 2.59       |
| Other pharynx cancer                  | 3                | 1.15<br>-1.17 to 3.08       |
| Gallbladder and biliary tract cancer  | 3                | 0.6<br>-0.79 to 2.49        |
| Pancreatic cancer                     | 3                | 0.31<br>-0.67 to 1.6        |
| Malignant skin melanoma               | 3                | 0.25<br>-0.71 to 1.42       |
| Non-melanoma skin cancer              | 3                | 0.77<br>-0.37 to 2.09       |
| Ovarian cancer                        | 3                | 0.41<br>-1.01 to 2.22       |
| Testicular cancer                     | 3                | 1.42<br>-0.18 to 3.56       |
| Kidney cancer                         | 3                | 0.41<br>-0.59 to 1.61       |
| Bladder cancer                        | 3                | 0.1<br>-0.87 to 1.53        |
| Brain and nervous system cancer       | 3                | 0.39<br>-0.94 to 1.96       |

**Appendix Table 15. Percent change after CoDCorrect by cause for all ages, both sexes, 2017**

| Cause name                                    | CoDCorrect level | Percent change          |
|-----------------------------------------------|------------------|-------------------------|
| Thyroid cancer                                | 3                | 1.26<br>-0.19 to 3.1    |
| Mesothelioma                                  | 3                | 0.63<br>-0.48 to 2.01   |
| Hodgkin lymphoma                              | 3                | 1.25<br>-1.43 to 4.31   |
| Non-Hodgkin's lymphoma                        | 3                | 0.79<br>-0.52 to 2.45   |
| Multiple myeloma                              | 3                | 0.43<br>-0.57 to 1.82   |
| Leukaemia                                     | 3                | 0.64<br>-0.99 to 2.68   |
| Other malignant cancers                       | 3                | 1.18<br>-0.26 to 3.09   |
| Other neoplasms                               | 3                | 0.22<br>-0.78 to 1.51   |
| Cardiovascular diseases                       | 2                | 0.72<br>-0.46 to 1.82   |
| Rheumatic heart disease                       | 3                | -0.07<br>-2.54 to 3.52  |
| Ischaemic heart disease                       | 3                | 2.13<br>0.87 to 4.32    |
| Stroke                                        | 3                | 2.96<br>1.73 to 5.39    |
| Ischaemic stroke                              | 4                | -0.59<br>-4.66 to 4.09  |
| Intracerebral hemorrhage                      | 4                | 2.31<br>-0.01 to 6.56   |
| Subarachnoid hemorrhage                       | 4                | 2.65<br>0.31 to 5.44    |
| Hypertensive heart disease                    | 3                | 3.2<br>1.81 to 5.81     |
| Cardiomyopathy and myocarditis                | 3                | 0.19<br>-1.19 to 3.49   |
| Atrial fibrillation and flutter               | 3                | 2.19<br>0.74 to 5.65    |
| Aortic aneurysm                               | 3                | 1.6<br>0.28 to 4.41     |
| Peripheral vascular disease                   | 3                | 0.97<br>-1.0 to 4.69    |
| Endocarditis                                  | 3                | -3.46<br>-5.08 to -1.26 |
| Non-rheumatic valvular heart disease          | 3                | 1.24<br>-0.22 to 5.11   |
| Other cardiovascular and circulatory diseases | 3                | 1.07<br>-0.57 to 3.69   |
| Chronic respiratory diseases                  | 2                | 1.5<br>-0.76 to 3.15    |
| Chronic obstructive pulmonary disease         | 3                | 33.24<br>26.61 to 39.38 |
| Pneumoconiosis                                | 3                | 10.85<br>5.99 to 15.14  |
| Silicosis                                     | 4                | 20.29<br>5.31 to 71.59  |
| Asbestosis                                    | 4                | 6.94<br>-8.78 to 76.32  |
| Coal workers pneumoconiosis                   | 4                | 30.14<br>12.73 to 80.36 |
| Other pneumoconiosis                          | 4                | 38.88<br>20.11 to 95.05 |
| Asthma                                        | 3                | 66.49<br>51.29 to 80.21 |



**Appendix Table 15. Percent change after CoDCorrect by cause for all ages, both sexes, 2017**

| Cause name                                                     | CoDCorrect level | Percent change          |
|----------------------------------------------------------------|------------------|-------------------------|
| Interstitial lung disease and pulmonary sarcoidosis            | 3                | 26.01<br>12.36 to 41.05 |
| Other chronic respiratory diseases                             | 3                | 26.89<br>18.47 to 39.08 |
| Cirrhosis and other chronic liver diseases                     | 3                | 8.73<br>3.07 to 14.91   |
| Cirrhosis and other chronic liver diseases due to hepatitis B  | 4                | 9.57<br>2.59 to 18.17   |
| Cirrhosis and other chronic liver diseases due to hepatitis C  | 4                | 8.71<br>3.49 to 13.79   |
| Cirrhosis and other chronic liver diseases due to alcohol use  | 4                | 6.95<br>1.93 to 13.31   |
| Cirrhosis and other chronic liver diseases due to other causes | 4                | 12.17<br>3.61 to 18.62  |
| Digestive diseases                                             | 2                | 1.36<br>-0.29 to 3.51   |
| Peptic ulcer disease                                           | 4                | 29.86<br>23.42 to 39.02 |
| Gastritis and duodenitis                                       | 4                | 26.14<br>16.46 to 42.34 |
| Appendicitis                                                   | 3                | 22.71<br>15.07 to 32.06 |
| Paralytic ileus and intestinal obstruction                     | 3                | 19.36<br>11.93 to 26.68 |
| Inguinal, femoral, and abdominal hernia                        | 3                | 17.59<br>12.56 to 27.21 |
| Inflammatory bowel disease                                     | 3                | 8.14<br>4.86 to 16.41   |
| Vascular intestinal disorders                                  | 3                | 8.17<br>5.32 to 13.25   |
| Gallbladder and biliary diseases                               | 3                | 9.78<br>6.21 to 14.85   |
| Pancreatitis                                                   | 3                | 10.18<br>5.59 to 17.56  |
| Other digestive diseases                                       | 3                | 11.24<br>6.14 to 16.43  |
| Neurological disorders                                         | 2                | 1.09<br>-0.06 to 2.5    |
| Alzheimer's disease and other dementias                        | 3                | 1.04<br>0.03 to 2.34    |
| Parkinson's disease                                            | 3                | 0.97<br>-0.19 to 2.36   |
| Epilepsy                                                       | 3                | 2.99<br>-1.81 to 7.06   |
| Multiple sclerosis                                             | 3                | 0.54<br>-0.39 to 1.91   |
| Motor neuron disease                                           | 3                | -0.33<br>-1.36 to 0.69  |
| Other neurological disorders                                   | 3                | 0.9<br>-1.01 to 2.92    |
| Mental disorders                                               | 2                | -2.91<br>-4.25 to -1.23 |
| Alcohol use disorders                                          | 3                | 1.63<br>0.41 to 3.22    |
| Drug use disorders                                             | 3                | -1.43<br>-2.28 to -0.44 |
| Opioid use disorders                                           | 4                | 24.07<br>16.03 to 32.41 |
| Cocaine use disorders                                          | 4                | 24.39<br>14.43 to 37.81 |
| Amphetamine use disorders                                      | 4                | 25.88<br>14.16 to 47.66 |

**Appendix Table 15. Percent change after CoDCorrect by cause for all ages, both sexes, 2017**

| Cause name                                                 | CoDCorrect level | Percent change             |
|------------------------------------------------------------|------------------|----------------------------|
| Other drug use disorders                                   | 4                | 30.69<br>24.35 to 41.38    |
| Eating disorders                                           | 3                | -2.91<br>-4.25 to -1.23    |
| Anorexia nervosa                                           | 4                | -21.82<br>-32.39 to -11.62 |
| Bulimia nervosa                                            | 4                | -77.9<br>-88.96 to -67.88  |
| Diabetes mellitus                                          | 3                | 1.56<br>0.09 to 3.25       |
| Acute glomerulonephritis                                   | 3                | 1.17<br>0.15 to 2.81       |
| Chronic kidney disease                                     | 3                | 1.47<br>0.2 to 2.95        |
| Chronic kidney disease due to hypertension                 | 4                | 1.67<br>0.45 to 3.1        |
| Chronic kidney disease due to glomerulonephritis           | 4                | 2.1<br>0.64 to 3.97        |
| Chronic kidney disease due to other and unspecified causes | 4                | 1.56<br>0.12 to 3.21       |
| Urinary diseases and male infertility                      | 3                | 2.4<br>0.4 to 4.76         |
| Urinary tract infections                                   | 4                | 34.45<br>19.74 to 74.66    |
| Urolithiasis                                               | 4                | 27.28<br>9.16 to 61.48     |
| Other urinary diseases                                     | 4                | 65.48<br>40.34 to 117.8    |
| Gynecological diseases                                     | 3                | 2.28<br>-1.02 to 5.37      |
| Uterine fibroids                                           | 4                | 61.88<br>42.41 to 139.61   |
| Polycystic ovarian syndrome                                | 4                | 117.32<br>23.74 to 940.74  |
| Endometriosis                                              | 4                | 197.18<br>120.41 to 395.5  |
| Genital prolapse                                           | 4                | 97.52<br>47.81 to 216.61   |
| Other gynecological diseases                               | 4                | 188.14<br>140.89 to 369.79 |
| Hemoglobinopathies and hemolytic anaemias                  | 3                | 3.52<br>-0.71 to 8.56      |
| Thalassemias                                               | 4                | 0.72<br>-4.94 to 8.08      |
| Sickle cell disorders                                      | 4                | 6.43<br>-2.34 to 17.27     |
| G6PD deficiency                                            | 4                | 3.66<br>0.67 to 7.13       |
| Other hemoglobinopathies and hemolytic anaemias            | 4                | 1.43<br>-0.74 to 4.0       |
| Endocrine, metabolic, blood, and immune disorders          | 3                | 0.8<br>-0.53 to 2.77       |
| Musculoskeletal disorders                                  | 2                | 1.59<br>-0.68 to 3.65      |
| Rheumatoid arthritis                                       | 3                | 54.87<br>27.91 to 66.77    |
| Other musculoskeletal disorders                            | 3                | 18.9<br>4.21 to 27.7       |
| Other non-communicable diseases                            | 2                | 2.76<br>0.19 to 5.5        |
| Congenital anomalies                                       | 3                | 3.21<br>-0.29 to 6.85      |

**Appendix Table 15. Percent change after CoDCorrect by cause for all ages, both sexes, 2017**

| Cause name                                    | CoDCorrect level | Percent change           |
|-----------------------------------------------|------------------|--------------------------|
| Neural tube defects                           | 4                | -8.56<br>-29.29 to 19.65 |
| Congenital heart anomalies                    | 4                | -5.48<br>-18.74 to 11.42 |
| Orofacial clefts                              | 4                | -7.67<br>-29.38 to 25.95 |
| Down's syndrome                               | 4                | -8.26<br>-17.68 to 2.72  |
| Other chromosomal abnormalities               | 4                | -2.36<br>-18.27 to 14.95 |
| Congenital musculoskeletal and limb anomalies | 4                | 0.66<br>-16.57 to 25.38  |
| Urogenital congenital anomalies               | 4                | -0.47<br>-13.69 to 17.1  |
| Digestive congenital anomalies                | 4                | -3.68<br>-20.73 to 15.7  |
| Other congenital anomalies                    | 4                | -5.87<br>-21.89 to 18.3  |
| Skin and subcutaneous diseases                | 2                | 2.29<br>0.39 to 4.97     |
| Cellulitis                                    | 4                | 21.33<br>-30.52 to 73.35 |
| Pyoderma                                      | 4                | 61.11<br>-0.33 to 123.68 |
| Decubitus ulcer                               | 3                | 1.4<br>-34.3 to 47.79    |
| Other skin and subcutaneous diseases          | 3                | 13.63<br>-14.69 to 90.81 |
| Sudden infant death syndrome                  | 3                | 4.17<br>-1.69 to 10.35   |
| Injuries                                      | 1                | 6.05<br>3.95 to 8.66     |
| Transport injuries                            | 2                | 1.84<br>-0.51 to 4.37    |
| Road injuries                                 | 3                | -3.93<br>-12.61 to 0.69  |
| Pedestrian road injuries                      | 4                | -1.43<br>-12.0 to 4.66   |
| Cyclist road injuries                         | 4                | 0.69<br>-9.58 to 6.4     |
| Motorcyclist road injuries                    | 4                | 2.35<br>-7.74 to 7.64    |
| Motor vehicle road injuries                   | 4                | 3.18<br>-3.91 to 9.51    |
| Other road injuries                           | 4                | 1.08<br>-9.52 to 8.43    |
| Other transport injuries                      | 3                | 6.0<br>-1.95 to 12.0     |
| Unintentional injuries                        | 2                | 2.71<br>0.51 to 5.62     |
| Falls                                         | 3                | 1.96<br>-0.07 to 4.72    |
| Drowning                                      | 3                | 0.82<br>-2.56 to 4.35    |
| Fire, heat, and hot substances                | 3                | 3.79<br>1.09 to 6.71     |
| Poisonings                                    | 3                | 2.39<br>0.27 to 4.91     |
| Poisoning by carbon monoxide                  | 4                | -1.1<br>-25.61 to 7.42   |
| Poisoning by other means                      | 4                | 6.77<br>-21.14 to 18.72  |

**Appendix Table 15. Percent change after CoDCorrect by cause for all ages, both sexes, 2017**

| Cause name                                         | CoDCorrect level | Percent change             |
|----------------------------------------------------|------------------|----------------------------|
| Exposure to mechanical forces                      | 3                | 3.71<br>1.56 to 6.56       |
| Unintentional firearm injuries                     | 4                | 10.9<br>1.07 to 28.24      |
| Other exposure to mechanical forces                | 4                | 13.43<br>3.85 to 43.6      |
| Adverse effects of medical treatment               | 3                | 2.99<br>0.68 to 5.71       |
| Animal contact                                     | 3                | 0.76<br>-3.71 to 5.88      |
| Venomous animal contact                            | 4                | 19.12<br>-28.06 to 80.45   |
| Non-venomous animal contact                        | 4                | 8.36<br>-13.79 to 67.25    |
| Foreign body                                       | 3                | 2.31<br>-0.0 to 4.99       |
| Pulmonary aspiration and foreign body in airway    | 4                | -1.4<br>-7.59 to 12.73     |
| Foreign body in other body part                    | 4                | -2.2<br>-9.52 to 16.56     |
| Other unintentional injuries                       | 3                | 3.15<br>0.97 to 5.97       |
| Self-harm and interpersonal violence               | 2                | 15.85<br>13.85 to 18.38    |
| Self-harm                                          | 3                | 1.52<br>-0.26 to 3.5       |
| Self-harm by firearm                               | 4                | 2.75<br>-9.94 to 23.77     |
| Self-harm by other specified means                 | 4                | -4.88<br>-18.66 to 8.09    |
| Interpersonal violence                             | 3                | 8.23<br>6.18 to 10.51      |
| Assault by firearm                                 | 4                | -0.98<br>-10.33 to 19.12   |
| Assault by sharp object                            | 4                | -2.79<br>-11.05 to 21.82   |
| Assault by other means                             | 4                | 11.98<br>3.65 to 42.66     |
| Maternal deaths aggravated by HIV/AIDS             | 4                | -4.76<br>-13.1 to 4.73     |
| Environmental heat and cold exposure               | 3                | 2.85<br>0.78 to 4.87       |
| Acute lymphoid leukaemia                           | 4                | -3.45<br>-12.94 to 5.08    |
| Chronic lymphoid leukaemia                         | 4                | 3.86<br>-0.12 to 9.27      |
| Acute myeloid leukaemia                            | 4                | -1.49<br>-8.3 to 5.23      |
| Chronic myeloid leukaemia                          | 4                | 0.55<br>-7.2 to 7.79       |
| Non-melanoma skin cancer (squamous-cell carcinoma) | 4                | 0.77<br>-0.37 to 2.09      |
| Executions and police conflict                     | 3                | 260.11<br>242.39 to 278.51 |
| Drug-susceptible tuberculosis                      | 4                | 4.62<br>1.48 to 7.87       |
| Zika virus disease                                 | 3                | -2.22<br>-7.49 to 0.89     |
| Alcoholic cardiomyopathy                           | 4                | 18.98<br>9.85 to 38.76     |
| Myocarditis                                        | 4                | 10.24<br>-0.01 to 24.57    |

**Appendix Table 15. Percent change after CoDCorrect by cause for all ages, both sexes, 2017**

| Cause name                                                             | CoDCorrect level | Percent change             |
|------------------------------------------------------------------------|------------------|----------------------------|
| Other leukaemia                                                        | 4                | 5.2<br>-6.01 to 15.55      |
| Other cardiomyopathy                                                   | 4                | 7.49<br>-1.47 to 24.24     |
| Multidrug-resistant tuberculosis without extensive drug resistance     | 4                | 4.59<br>1.21 to 8.06       |
| Extensively drug-resistant tuberculosis                                | 4                | 3.8<br>1.78 to 5.96        |
| HIV/AIDS and sexually transmitted infections                           | 2                | 812.88<br>421.2 to 1975.56 |
| Respiratory infections and tuberculosis                                | 2                | 3.76<br>1.23 to 6.24       |
| Enteric infections                                                     | 2                | 1.5<br>-3.91 to 6.93       |
| Typhoid and paratyphoid                                                | 3                | -8.68<br>-16.77 to 0.6     |
| iNTS                                                                   | 3                | 9.86<br>-0.57 to 19.8      |
| Other infectious diseases                                              | 2                | 3.1<br>-2.28 to 8.33       |
| Maternal and neonatal disorders                                        | 2                | -0.74<br>-5.07 to 3.53     |
| Myelodysplastic, myeloproliferative, and other hematopoietic neoplasms | 4                | 93.87<br>37.31 to 141.77   |
| Other benign and in situ neoplasms                                     | 4                | 374.13<br>307.14 to 522.87 |
| Non-rheumatic calcific aortic valve disease                            | 4                | 2.3<br>-15.09 to 22.84     |
| Non-rheumatic degenerative mitral valve disease                        | 4                | 17.99<br>6.67 to 41.52     |
| Other non-rheumatic valve diseases                                     | 4                | 11.79<br>-8.11 to 32.65    |
| Cirrhosis due to NASH                                                  | 4                | 7.2<br>2.25 to 12.06       |
| Substance use disorders                                                | 2                | 0.16<br>-0.74 to 1.17      |
| Diabetes and kidney diseases                                           | 2                | 1.52<br>0.09 to 3.07       |
| Diabetes mellitus type 1                                               | 4                | 14.53<br>2.04 to 22.83     |
| Diabetes mellitus type 2                                               | 4                | 12.68<br>5.18 to 18.5      |
| Bacterial skin diseases                                                | 3                | 11.75<br>-21.73 to 74.47   |
| Upper digestive system diseases                                        | 3                | 12.98<br>8.42 to 21.09     |
| Maternal abortive outcome                                              | 4                | 1.54<br>-5.61 to 9.54      |
| Liver cancer due to NASH                                               | 4                | 1.34<br>0.41 to 2.43       |
| Chronic kidney disease due to diabetes mellitus type 1                 | 4                | 1.22<br>-0.06 to 2.68      |
| Chronic kidney disease due to diabetes mellitus type 2                 | 4                | 0.9<br>-0.37 to 2.23       |

**Appendix Table 16. Theoretical Minimum Risk Reference Life Table**

| Age | Life Expectancy |
|-----|-----------------|
| 0   | 87.885872       |
| 1   | 87.007248       |
| 5   | 83.035378       |
| 10  | 78.050774       |
| 15  | 73.069237       |
| 20  | 68.110138       |
| 25  | 63.157372       |
| 30  | 58.207291       |
| 35  | 53.27124        |
| 40  | 48.368408       |
| 45  | 43.49641        |
| 50  | 38.703121       |
| 55  | 33.98209        |
| 60  | 29.31563        |
| 65  | 24.73456        |
| 70  | 20.32095        |
| 75  | 16.09445        |
| 80  | 12.18093        |
| 85  | 8.7796783       |
| 90  | 6.0613198       |
| 95  | 3.8977709       |
| 100 | 2.2286451       |
| 105 | 1.6117361       |
| 110 | 1.363304        |

**Appendix Table 17. GBD world population age standard**

| <b>Age group</b> | <b>Percent of Population</b> | <b>Rounded</b> |
|------------------|------------------------------|----------------|
| ENN              | 0.040802107                  | 0.04           |
| LNN              | 0.121276112                  | 0.12           |
| PNN              | 1.916163425                  | 1.92           |
| 0-1              | 2.078241644                  | 2.08           |
| 1-4              | 8.102445249                  | 8.1            |
| 5-9              | 9.677325318                  | 9.68           |
| 10-14            | 8.952609678                  | 8.95           |
| 15-19            | 8.382858071                  | 8.38           |
| 20-24            | 8.01707612                   | 8.02           |
| 25-29            | 7.778732811                  | 7.78           |
| 30-34            | 7.331586983                  | 7.33           |
| 35-39            | 6.775951151                  | 6.78           |
| 40-44            | 6.089034035                  | 6.09           |
| 45-49            | 5.465811837                  | 5.47           |
| 50-54            | 4.873621621                  | 4.87           |
| 55-59            | 4.251640217                  | 4.25           |
| 60-64            | 3.5961672                    | 3.6            |
| 65-69            | 2.914902912                  | 2.91           |
| 70-74            | 2.130279933                  | 2.13           |
| 75-79            | 1.608333391                  | 1.61           |
| 80-84            | 1.078423497                  | 1.08           |
| 85-89            | 0.603162091                  | 0.6            |
| 90-94            | 0.234261019                  | 0.23           |
| 95+              | 0.057535221                  | 0.06           |

**Appendix Table 18. Socio-demographic Index R-squared values with lags up to 10 years**

| Lag | e(0)        | ln(35q15)   | ln(20q50)   | ln(5q0)     |
|-----|-------------|-------------|-------------|-------------|
| 0   | 0.764720397 | 0.539282717 | 0.673297261 | 0.745670088 |
| 1   | 0.756262105 | 0.508555198 | 0.667442818 | 0.746860548 |
| 2   | 0.758104221 | 0.495372377 | 0.666991889 | 0.750912051 |
| 3   | 0.760324796 | 0.480083789 | 0.66720902  | 0.753702596 |
| 4   | 0.754374098 | 0.452225684 | 0.655508677 | 0.757349217 |
| 5   | 0.748455861 | 0.43139181  | 0.645926748 | 0.758644194 |
| 6   | 0.72879542  | 0.393148215 | 0.629005433 | 0.75460407  |
| 7   | 0.712485657 | 0.358955298 | 0.60776771  | 0.742258709 |
| 8   | 0.714419392 | 0.3546532   | 0.60439531  | 0.753080396 |
| 9   | 0.702252799 | 0.341887845 | 0.5934924   | 0.747192483 |
| 10  | 0.694689565 | 0.330712923 | 0.585057068 | 0.743454509 |



**Appendix Table 19. Socio-demographic Index groupings by geography, based on 2017 values**

| Geography                                        | 2017 SDI | SDI Quintile    |
|--------------------------------------------------|----------|-----------------|
| Global                                           | 0.652    |                 |
| Central Europe, Eastern Europe, and Central Asia | 0.766    |                 |
| Central Asia                                     | 0.673    |                 |
| Armenia                                          | 0.702    | High-middle SDI |
| Azerbaijan                                       | 0.701    | High-middle SDI |
| Georgia                                          | 0.7      | High-middle SDI |
| Kazakhstan                                       | 0.735    | High-middle SDI |
| Kyrgyzstan                                       | 0.607    | Low-middle SDI  |
| Mongolia                                         | 0.662    | Middle SDI      |
| Tajikistan                                       | 0.523    | Low-middle SDI  |
| Turkmenistan                                     | 0.696    | Middle SDI      |
| Uzbekistan                                       | 0.63     | Middle SDI      |
| Central Europe                                   | 0.814    |                 |
| Albania                                          | 0.685    | Middle SDI      |
| Bosnia and Herzegovina                           | 0.713    | High-middle SDI |
| Bulgaria                                         | 0.792    | High-middle SDI |
| Croatia                                          | 0.825    | High SDI        |
| Czech Republic                                   | 0.851    | High SDI        |
| Hungary                                          | 0.817    | High-middle SDI |
| Macedonia                                        | 0.754    | High-middle SDI |
| Montenegro                                       | 0.788    | High-middle SDI |
| Poland                                           | 0.844    | High SDI        |
| Romania                                          | 0.784    | High-middle SDI |
| Serbia                                           | 0.752    | High-middle SDI |
| Slovakia                                         | 0.842    | High SDI        |
| Slovenia                                         | 0.86     | High SDI        |
| Eastern Europe                                   | 0.785    |                 |
| Belarus                                          | 0.773    | High-middle SDI |
| Estonia                                          | 0.858    | High SDI        |
| Latvia                                           | 0.825    | High SDI        |
| Lithuania                                        | 0.841    | High SDI        |
| Moldova                                          | 0.676    | Middle SDI      |
| Russian Federation                               | 0.792    | High-middle SDI |
| Ukraine                                          | 0.74     | High-middle SDI |
| High-income                                      | 0.854    |                 |
| Australasia                                      | 0.869    |                 |
| Australia                                        | 0.873    | High SDI        |
| New Zealand                                      | 0.842    | High SDI        |
| High-income Asia-Pacific                         | 0.869    |                 |
| Brunei                                           | 0.856    | High SDI        |
| Japan                                            | 0.865    | High SDI        |
| Aichi                                            | 0.875    | High SDI        |
| Akita                                            | 0.829    | High SDI        |
| Aomori                                           | 0.825    | High SDI        |
| Chiba                                            | 0.859    | High SDI        |

**Appendix Table 19. Socio-demographic Index groupings by geography, based on 2017 values**

| <b>Geography</b> | <b>2017 SDI</b> | <b>SDI Quintile</b> |
|------------------|-----------------|---------------------|
| Ehime            | 0.838           | High SDI            |
| Fukui            | 0.852           | High SDI            |
| Fukuoka          | 0.855           | High SDI            |
| Fukushima        | 0.831           | High SDI            |
| Gifu             | 0.849           | High SDI            |
| Gunma            | 0.851           | High SDI            |
| Hiroshima        | 0.863           | High SDI            |
| Hokkaidō         | 0.842           | High SDI            |
| Hyōgo            | 0.86            | High SDI            |
| Ibaraki          | 0.851           | High SDI            |
| Ishikawa         | 0.856           | High SDI            |
| Iwate            | 0.825           | High SDI            |
| Kagawa           | 0.85            | High SDI            |
| Kagoshima        | 0.83            | High SDI            |
| Kanagawa         | 0.875           | High SDI            |
| Kōchi            | 0.825           | High SDI            |
| Kumamoto         | 0.832           | High SDI            |
| Kyōto            | 0.873           | High SDI            |
| Mie              | 0.854           | High SDI            |
| Miyagi           | 0.85            | High SDI            |
| Miyazaki         | 0.823           | High SDI            |
| Nagano           | 0.851           | High SDI            |
| Nagasaki         | 0.826           | High SDI            |
| Nara             | 0.848           | High SDI            |
| Niigata          | 0.843           | High SDI            |
| Ōita             | 0.846           | High SDI            |
| Okayama          | 0.856           | High SDI            |
| Okinawa          | 0.818           | High SDI            |
| Ōsaka            | 0.872           | High SDI            |
| Saga             | 0.834           | High SDI            |
| Saitama          | 0.852           | High SDI            |
| Shiga            | 0.871           | High SDI            |
| Shimane          | 0.831           | High SDI            |
| Shizuoka         | 0.859           | High SDI            |
| Tochigi          | 0.853           | High SDI            |
| Tokushima        | 0.845           | High SDI            |
| Tōkyō            | 0.924           | High SDI            |
| Tottori          | 0.834           | High SDI            |
| Toyama           | 0.86            | High SDI            |
| Wakayama         | 0.84            | High SDI            |
| Yamagata         | 0.832           | High SDI            |
| Yamaguchi        | 0.849           | High SDI            |
| Yamanashi        | 0.854           | High SDI            |
| South Korea      | 0.872           | High SDI            |
| Singapore        | 0.872           | High SDI            |

**Appendix Table 19. Socio-demographic Index groupings by geography, based on 2017 values**

| <b>Geography</b>          | <b>2017 SDI</b> | <b>SDI Quintile</b> |
|---------------------------|-----------------|---------------------|
| High-income North America | 0.868           |                     |
| Canada                    | 0.882           | High SDI            |
| Greenland                 | 0.76            | High-middle SDI     |
| USA                       | 0.867           | High SDI            |
| Alabama                   | 0.837           | High SDI            |
| Alaska                    | 0.861           | High SDI            |
| Arizona                   | 0.845           | High SDI            |
| Arkansas                  | 0.826           | High SDI            |
| California                | 0.872           | High SDI            |
| Colorado                  | 0.882           | High SDI            |
| Connecticut               | 0.906           | High SDI            |
| Delaware                  | 0.874           | High SDI            |
| Washington, DC            | 0.89            | High SDI            |
| Florida                   | 0.864           | High SDI            |
| Georgia                   | 0.848           | High SDI            |
| Hawaii                    | 0.872           | High SDI            |
| Idaho                     | 0.841           | High SDI            |
| Illinois                  | 0.879           | High SDI            |
| Indiana                   | 0.848           | High SDI            |
| Iowa                      | 0.87            | High SDI            |
| Kansas                    | 0.864           | High SDI            |
| Kentucky                  | 0.831           | High SDI            |
| Louisiana                 | 0.835           | High SDI            |
| Maine                     | 0.872           | High SDI            |
| Maryland                  | 0.896           | High SDI            |
| Massachusetts             | 0.913           | High SDI            |
| Michigan                  | 0.868           | High SDI            |
| Minnesota                 | 0.893           | High SDI            |
| Mississippi               | 0.819           | High SDI            |
| Missouri                  | 0.853           | High SDI            |
| Montana                   | 0.863           | High SDI            |
| Nebraska                  | 0.873           | High SDI            |
| Nevada                    | 0.847           | High SDI            |
| New Hampshire             | 0.904           | High SDI            |
| New Jersey                | 0.899           | High SDI            |
| New Mexico                | 0.835           | High SDI            |
| New York                  | 0.893           | High SDI            |
| North Carolina            | 0.85            | High SDI            |
| North Dakota              | 0.88            | High SDI            |
| Ohio                      | 0.858           | High SDI            |
| Oklahoma                  | 0.838           | High SDI            |
| Oregon                    | 0.871           | High SDI            |
| Pennsylvania              | 0.879           | High SDI            |
| Rhode Island              | 0.89            | High SDI            |
| South Carolina            | 0.846           | High SDI            |

**Appendix Table 19. Socio-demographic Index groupings by geography, based on 2017 values**

| <b>Geography</b>        | <b>2017 SDI</b> | <b>SDI Quintile</b> |
|-------------------------|-----------------|---------------------|
| South Dakota            | 0.86            | High SDI            |
| Tennessee               | 0.837           | High SDI            |
| Texas                   | 0.838           | High SDI            |
| Utah                    | 0.856           | High SDI            |
| Vermont                 | 0.896           | High SDI            |
| Virginia                | 0.885           | High SDI            |
| Washington              | 0.884           | High SDI            |
| West Virginia           | 0.825           | High SDI            |
| Wisconsin               | 0.878           | High SDI            |
| Wyoming                 | 0.869           | High SDI            |
| Southern Latin America  | 0.72            |                     |
| Argentina               | 0.71            | High-middle SDI     |
| Chile                   | 0.748           | High-middle SDI     |
| Uruguay                 | 0.707           | High-middle SDI     |
| Western Europe          | 0.857           |                     |
| Andorra                 | 0.902           | High SDI            |
| Austria                 | 0.866           | High SDI            |
| Belgium                 | 0.886           | High SDI            |
| Cyprus                  | 0.865           | High SDI            |
| Denmark                 | 0.918           | High SDI            |
| Finland                 | 0.893           | High SDI            |
| France                  | 0.865           | High SDI            |
| Germany                 | 0.87            | High SDI            |
| Greece                  | 0.817           | High SDI            |
| Iceland                 | 0.907           | High SDI            |
| Ireland                 | 0.882           | High SDI            |
| Israel                  | 0.816           | High-middle SDI     |
| Italy                   | 0.843           | High SDI            |
| Luxembourg              | 0.916           | High SDI            |
| Malta                   | 0.836           | High SDI            |
| Netherlands             | 0.912           | High SDI            |
| Norway                  | 0.911           | High SDI            |
| Portugal                | 0.778           | High-middle SDI     |
| Spain                   | 0.825           | High SDI            |
| Sweden                  | 0.883           | High SDI            |
| Stockholm               | 0.914           | High SDI            |
| Sweden except Stockholm | 0.873           | High SDI            |
| Switzerland             | 0.889           | High SDI            |
| United Kingdom          | 0.843           | High SDI            |
| England                 | 0.849           | High SDI            |
| East Midlands           | 0.83            | High SDI            |
| Derby                   | 0.846           | High SDI            |
| Derbyshire              | 0.817           | High SDI            |
| Leicester               | 0.839           | High SDI            |
| Leicestershire          | 0.846           | High SDI            |

**Appendix Table 19. Socio-demographic Index groupings by geography, based on 2017 values**

| <b>Geography</b>       | <b>2017 SDI</b> | <b>SDI Quintile</b> |
|------------------------|-----------------|---------------------|
| Lincolnshire           | 0.812           | High SDI            |
| Northamptonshire       | 0.829           | High SDI            |
| Nottingham             | 0.863           | High SDI            |
| Nottinghamshire        | 0.814           | High SDI            |
| Rutland                | 0.833           | High SDI            |
| East of England        | 0.84            | High SDI            |
| Bedford                | 0.838           | High SDI            |
| Cambridgeshire         | 0.871           | High SDI            |
| Central Bedfordshire   | 0.834           | High SDI            |
| Essex                  | 0.832           | High SDI            |
| Hertfordshire          | 0.87            | High SDI            |
| Luton                  | 0.833           | High SDI            |
| Norfolk                | 0.826           | High SDI            |
| Peterborough           | 0.818           | High SDI            |
| Southend-on-Sea        | 0.811           | High SDI            |
| Suffolk                | 0.821           | High SDI            |
| Thurrock               | 0.807           | High SDI            |
| Greater London         | 0.894           | High SDI            |
| Barking and Dagenham   | 0.802           | High SDI            |
| Barnet                 | 0.865           | High SDI            |
| Bexley                 | 0.826           | High SDI            |
| Brent                  | 0.849           | High SDI            |
| Bromley                | 0.848           | High SDI            |
| Camden                 | 0.93            | High SDI            |
| Croydon                | 0.833           | High SDI            |
| Ealing                 | 0.865           | High SDI            |
| Enfield                | 0.839           | High SDI            |
| Greenwich              | 0.833           | High SDI            |
| Hackney                | 0.887           | High SDI            |
| Hammersmith and Fulham | 0.927           | High SDI            |
| Haringey               | 0.854           | High SDI            |
| Harrow                 | 0.848           | High SDI            |
| Havering               | 0.824           | High SDI            |
| Hillingdon             | 0.882           | High SDI            |
| Hounslow               | 0.879           | High SDI            |
| Islington              | 0.922           | High SDI            |
| Kensington and Chelsea | 0.932           | High SDI            |
| Kingston upon Thames   | 0.89            | High SDI            |
| Lambeth                | 0.9             | High SDI            |
| Lewisham               | 0.843           | High SDI            |
| Merton                 | 0.873           | High SDI            |
| Newham                 | 0.838           | High SDI            |
| Redbridge              | 0.831           | High SDI            |
| Richmond upon Thames   | 0.902           | High SDI            |
| Southwark              | 0.912           | High SDI            |

**Appendix Table 19. Socio-demographic Index groupings by geography, based on 2017 values**

| <b>Geography</b>          | <b>2017 SDI</b> | <b>SDI Quintile</b> |
|---------------------------|-----------------|---------------------|
| Sutton                    | 0.843           | High SDI            |
| Tower Hamlets             | 0.905           | High SDI            |
| Waltham Forest            | 0.819           | High SDI            |
| Wandsworth                | 0.911           | High SDI            |
| Westminster               | 0.927           | High SDI            |
| North East England        | 0.821           | High SDI            |
| County Durham             | 0.81            | High SDI            |
| Darlington                | 0.825           | High SDI            |
| Gateshead                 | 0.826           | High SDI            |
| Hartlepool                | 0.793           | High SDI            |
| Middlesbrough             | 0.808           | High SDI            |
| Newcastle upon Tyne       | 0.872           | High SDI            |
| North Tyneside            | 0.825           | High SDI            |
| Northumberland            | 0.808           | High SDI            |
| Redcar and Cleveland      | 0.79            | High SDI            |
| South Tyneside            | 0.794           | High SDI            |
| Stockton-on-Tees          | 0.823           | High SDI            |
| Sunderland                | 0.815           | High SDI            |
| North West England        | 0.834           | High SDI            |
| Blackburn with Darwen     | 0.802           | High SDI            |
| Blackpool                 | 0.781           | High SDI            |
| Bolton                    | 0.805           | High SDI            |
| Bury                      | 0.815           | High SDI            |
| Cheshire East             | 0.864           | High SDI            |
| Cheshire West and Chester | 0.855           | High SDI            |
| Cumbria                   | 0.828           | High SDI            |
| Halton                    | 0.824           | High SDI            |
| Knowsley                  | 0.816           | High SDI            |
| Lancashire                | 0.831           | High SDI            |
| Liverpool                 | 0.852           | High SDI            |
| Manchester                | 0.885           | High SDI            |
| Oldham                    | 0.79            | High SDI            |
| Rochdale                  | 0.795           | High SDI            |
| Salford                   | 0.838           | High SDI            |
| Sefton                    | 0.812           | High SDI            |
| St Helens                 | 0.803           | High SDI            |
| Stockport                 | 0.843           | High SDI            |
| Tameside                  | 0.797           | High SDI            |
| Trafford                  | 0.873           | High SDI            |
| Warrington                | 0.86            | High SDI            |
| Wigan                     | 0.798           | High SDI            |
| Wirral                    | 0.803           | High SDI            |
| South East England        | 0.856           | High SDI            |
| Bracknell Forest          | 0.869           | High SDI            |
| Brighton and Hove         | 0.885           | High SDI            |

**Appendix Table 19. Socio-demographic Index groupings by geography, based on 2017 values**

| <b>Geography</b>             | <b>2017 SDI</b> | <b>SDI Quintile</b> |
|------------------------------|-----------------|---------------------|
| Buckinghamshire              | 0.865           | High SDI            |
| East Sussex                  | 0.814           | High SDI            |
| Hampshire                    | 0.85            | High SDI            |
| Isle of Wight                | 0.814           | High SDI            |
| Kent                         | 0.828           | High SDI            |
| Medway                       | 0.809           | High SDI            |
| Milton Keynes                | 0.86            | High SDI            |
| Oxfordshire                  | 0.879           | High SDI            |
| Portsmouth                   | 0.86            | High SDI            |
| Reading                      | 0.895           | High SDI            |
| Slough                       | 0.859           | High SDI            |
| Southampton                  | 0.858           | High SDI            |
| Surrey                       | 0.883           | High SDI            |
| West Berkshire               | 0.872           | High SDI            |
| West Sussex                  | 0.843           | High SDI            |
| Windsor and Maidenhead       | 0.889           | High SDI            |
| Wokingham                    | 0.885           | High SDI            |
| South West England           | 0.841           | High SDI            |
| Bath and North East Somerset | 0.875           | High SDI            |
| Bournemouth                  | 0.858           | High SDI            |
| Bristol, City of             | 0.884           | High SDI            |
| Cornwall                     | 0.817           | High SDI            |
| Devon                        | 0.837           | High SDI            |
| Dorset                       | 0.825           | High SDI            |
| Gloucestershire              | 0.85            | High SDI            |
| North Somerset               | 0.832           | High SDI            |
| Plymouth                     | 0.836           | High SDI            |
| Poole                        | 0.842           | High SDI            |
| Somerset                     | 0.816           | High SDI            |
| South Gloucestershire        | 0.867           | High SDI            |
| Swindon                      | 0.847           | High SDI            |
| Torbay                       | 0.79            | High SDI            |
| Wiltshire                    | 0.829           | High SDI            |
| West Midlands                | 0.829           | High SDI            |
| Birmingham                   | 0.84            | High SDI            |
| Coventry                     | 0.848           | High SDI            |
| Dudley                       | 0.799           | High SDI            |
| Herefordshire, County of     | 0.828           | High SDI            |
| Sandwell                     | 0.797           | High SDI            |
| Shropshire                   | 0.832           | High SDI            |
| Solihull                     | 0.855           | High SDI            |
| Staffordshire                | 0.826           | High SDI            |
| Stoke-on-Trent               | 0.804           | High SDI            |
| Telford and Wrekin           | 0.822           | High SDI            |
| Walsall                      | 0.791           | High SDI            |

**Appendix Table 19. Socio-demographic Index groupings by geography, based on 2017 values**

| <b>Geography</b>                 | <b>2017 SDI</b> | <b>SDI Quintile</b> |
|----------------------------------|-----------------|---------------------|
| Warwickshire                     | 0.857           | High SDI            |
| Wolverhampton                    | 0.811           | High SDI            |
| Worcestershire                   | 0.833           | High SDI            |
| Yorkshire and the Humber         | 0.83            | High SDI            |
| Barnsley                         | 0.787           | High SDI            |
| Bradford                         | 0.807           | High SDI            |
| Calderdale                       | 0.827           | High SDI            |
| Doncaster                        | 0.791           | High SDI            |
| East Riding of Yorkshire         | 0.822           | High SDI            |
| Kingston upon Hull, City of      | 0.813           | High SDI            |
| Kirklees                         | 0.816           | High SDI            |
| Leeds                            | 0.868           | High SDI            |
| North East Lincolnshire          | 0.804           | High SDI            |
| North Lincolnshire               | 0.811           | High SDI            |
| North Yorkshire                  | 0.839           | High SDI            |
| Rotherham                        | 0.796           | High SDI            |
| Sheffield                        | 0.853           | High SDI            |
| Wakefield                        | 0.806           | High SDI            |
| York                             | 0.879           | High SDI            |
| Northern Ireland                 | 0.835           | High SDI            |
| Scotland                         | 0.805           | High SDI            |
| Wales                            | 0.806           | High SDI            |
| Latin America and Caribbean      | 0.64            |                     |
| Andean Latin America             | 0.628           |                     |
| Bolivia                          | 0.587           | Low-middle SDI      |
| Ecuador                          | 0.636           | Middle SDI          |
| Peru                             | 0.636           | Middle SDI          |
| Caribbean                        | 0.638           |                     |
| Antigua and Barbuda              | 0.715           | High-middle SDI     |
| The Bahamas                      | 0.756           | High-middle SDI     |
| Barbados                         | 0.739           | High-middle SDI     |
| Belize                           | 0.602           | Low-middle SDI      |
| Bermuda                          | 0.805           | High-middle SDI     |
| Cuba                             | 0.688           | Middle SDI          |
| Dominica                         | 0.687           | Middle SDI          |
| Dominican Republic               | 0.593           | Low-middle SDI      |
| Grenada                          | 0.64            | Middle SDI          |
| Guyana                           | 0.584           | Low-middle SDI      |
| Haiti                            | 0.442           | Low SDI             |
| Jamaica                          | 0.679           | Middle SDI          |
| Puerto Rico                      | 0.813           | High-middle SDI     |
| Saint Lucia                      | 0.653           | Middle SDI          |
| Saint Vincent and the Grenadines | 0.608           | Middle SDI          |
| Suriname                         | 0.641           | Middle SDI          |
| Trinidad and Tobago              | 0.698           | Middle SDI          |



**Appendix Table 19. Socio-demographic Index groupings by geography, based on 2017 values**

| <b>Geography</b>                | <b>2017 SDI</b> | <b>SDI Quintile</b> |
|---------------------------------|-----------------|---------------------|
| Virgin Islands                  | 0.807           | High-middle SDI     |
| Central Latin America           | 0.623           |                     |
| Colombia                        | 0.634           | Middle SDI          |
| Costa Rica                      | 0.662           | Middle SDI          |
| El Salvador                     | 0.593           | Low-middle SDI      |
| Guatemala                       | 0.524           | Low-middle SDI      |
| Honduras                        | 0.512           | Low-middle SDI      |
| Mexico                          | 0.628           | Middle SDI          |
| Aguascalientes                  | 0.659           | Middle SDI          |
| Baja California                 | 0.657           | Middle SDI          |
| Baja California Sur             | 0.659           | Middle SDI          |
| Campeche                        | 0.616           | Middle SDI          |
| Chiapas                         | 0.533           | Middle SDI          |
| Chihuahua                       | 0.639           | Middle SDI          |
| Coahuila                        | 0.645           | Middle SDI          |
| Colima                          | 0.654           | Middle SDI          |
| Mexico City                     | 0.716           | Middle SDI          |
| Durango                         | 0.624           | Middle SDI          |
| Guanajuato                      | 0.621           | Middle SDI          |
| Guerrero                        | 0.562           | Middle SDI          |
| Hidalgo                         | 0.587           | Middle SDI          |
| Jalisco                         | 0.649           | Middle SDI          |
| México                          | 0.635           | Middle SDI          |
| Michoacán de Ocampo             | 0.586           | Middle SDI          |
| Morelos                         | 0.635           | Middle SDI          |
| Nayarit                         | 0.62            | Middle SDI          |
| Nuevo León                      | 0.677           | Middle SDI          |
| Oaxaca                          | 0.561           | Middle SDI          |
| Puebla                          | 0.584           | Middle SDI          |
| Querétaro                       | 0.639           | Middle SDI          |
| Quintana Roo                    | 0.626           | Middle SDI          |
| San Luis Potosí                 | 0.621           | Middle SDI          |
| Sinaloa                         | 0.649           | Middle SDI          |
| Sonora                          | 0.65            | Middle SDI          |
| Tabasco                         | 0.611           | Middle SDI          |
| Tamaulipas                      | 0.647           | Middle SDI          |
| Tlaxcala                        | 0.604           | Middle SDI          |
| Veracruz de Ignacio de la Llave | 0.592           | Middle SDI          |
| Yucatán                         | 0.63            | Middle SDI          |
| Zacatecas                       | 0.608           | Middle SDI          |
| Nicaragua                       | 0.53            | Low-middle SDI      |
| Panama                          | 0.677           | Middle SDI          |
| Venezuela                       | 0.655           | Middle SDI          |
| Tropical Latin America          | 0.662           |                     |
| Brazil                          | 0.663           | Middle SDI          |

**Appendix Table 19. Socio-demographic Index groupings by geography, based on 2017 values**

| Geography                    | 2017 SDI | SDI Quintile    |
|------------------------------|----------|-----------------|
| Acre                         | 0.602    | Low-middle SDI  |
| Alagoas                      | 0.556    | Low-middle SDI  |
| Amapá                        | 0.659    | Middle SDI      |
| Amazonas                     | 0.629    | Middle SDI      |
| Bahia                        | 0.591    | Low-middle SDI  |
| Ceará                        | 0.6      | Low-middle SDI  |
| Distrito Federal             | 0.792    | High-middle SDI |
| Espírito Santo               | 0.677    | Middle SDI      |
| Goiás                        | 0.65     | Middle SDI      |
| Maranhão                     | 0.507    | Low-middle SDI  |
| Mato Grosso                  | 0.662    | Middle SDI      |
| Mato Grosso do Sul           | 0.65     | Middle SDI      |
| Minas Gerais                 | 0.661    | Middle SDI      |
| Pará                         | 0.579    | Low-middle SDI  |
| Paraíba                      | 0.574    | Low-middle SDI  |
| Paraná                       | 0.682    | Middle SDI      |
| Pernambuco                   | 0.594    | Low-middle SDI  |
| Piauí                        | 0.552    | Low-middle SDI  |
| Rio de Janeiro               | 0.709    | High-middle SDI |
| Rio Grande do Norte          | 0.605    | Low-middle SDI  |
| Rio Grande do Sul            | 0.693    | Middle SDI      |
| Rondônia                     | 0.622    | Middle SDI      |
| Roraima                      | 0.646    | Middle SDI      |
| Santa Catarina               | 0.702    | High-middle SDI |
| São Paulo                    | 0.72     | High-middle SDI |
| Sergipe                      | 0.616    | Middle SDI      |
| Tocantins                    | 0.611    | Middle SDI      |
| Paraguay                     | 0.619    | Middle SDI      |
| North Africa and Middle East | 0.639    |                 |
| North Africa and Middle East | 0.639    |                 |
| Afghanistan                  | 0.29     | Low SDI         |
| Algeria                      | 0.696    | Middle SDI      |
| Bahrain                      | 0.712    | High-middle SDI |
| Egypt                        | 0.604    | Low-middle SDI  |
| Iran                         | 0.7      | High-middle SDI |
| Iraq                         | 0.585    | Low-middle SDI  |
| Jordan                       | 0.697    | Middle SDI      |
| Kuwait                       | 0.786    | High-middle SDI |
| Lebanon                      | 0.73     | High-middle SDI |
| Libya                        | 0.761    | High-middle SDI |
| Morocco                      | 0.579    | Low-middle SDI  |
| Palestine                    | 0.541    | Low-middle SDI  |
| Oman                         | 0.744    | High-middle SDI |
| Qatar                        | 0.766    | High-middle SDI |
| Saudi Arabia                 | 0.779    | High-middle SDI |

**Appendix Table 19. Socio-demographic Index groupings by geography, based on 2017 values**

| <b>Geography</b>                       | <b>2017 SDI</b> | <b>SDI Quintile</b> |
|----------------------------------------|-----------------|---------------------|
| Sudan                                  | 0.478           | Low-middle SDI      |
| Syria                                  | 0.611           | Middle SDI          |
| Tunisia                                | 0.675           | Middle SDI          |
| Turkey                                 | 0.729           | High-middle SDI     |
| United Arab Emirates                   | 0.795           | High-middle SDI     |
| Yemen                                  | 0.43            | Low SDI             |
| South Asia                             | 0.534           |                     |
| South Asia                             | 0.534           |                     |
| Bangladesh                             | 0.458           | Low SDI             |
| Bhutan                                 | 0.57            | Low-middle SDI      |
| India                                  | 0.55            | Low-middle SDI      |
| Andhra Pradesh                         | 0.536           | Low-middle SDI      |
| Arunachal Pradesh                      | 0.556           | Low-middle SDI      |
| Assam                                  | 0.53            | Low-middle SDI      |
| Bihar                                  | 0.433           | Low SDI             |
| Chhattisgarh                           | 0.512           | Low-middle SDI      |
| Delhi                                  | 0.715           | High-middle SDI     |
| Goa                                    | 0.74            | High-middle SDI     |
| Gujarat                                | 0.584           | Low-middle SDI      |
| Haryana                                | 0.6             | Low-middle SDI      |
| Himachal Pradesh                       | 0.633           | Middle SDI          |
| Jammu and Kashmir                      | 0.59            | Low-middle SDI      |
| Jharkhand                              | 0.487           | Low-middle SDI      |
| Karnataka                              | 0.574           | Low-middle SDI      |
| Kerala                                 | 0.659           | Middle SDI          |
| Madhya Pradesh                         | 0.487           | Low-middle SDI      |
| Maharashtra                            | 0.618           | Middle SDI          |
| Manipur                                | 0.59            | Low-middle SDI      |
| Meghalaya                              | 0.565           | Low-middle SDI      |
| Mizoram                                | 0.616           | Middle SDI          |
| Nagaland                               | 0.633           | Middle SDI          |
| Odisha                                 | 0.524           | Low-middle SDI      |
| Punjab                                 | 0.622           | Middle SDI          |
| Rajasthan                              | 0.492           | Low-middle SDI      |
| Sikkim                                 | 0.628           | Middle SDI          |
| Tamil Nadu                             | 0.615           | Middle SDI          |
| Telangana                              | 0.575           | Low-middle SDI      |
| Tripura                                | 0.543           | Low-middle SDI      |
| Uttar Pradesh                          | 0.488           | Low-middle SDI      |
| Uttarakhand                            | 0.607           | Middle SDI          |
| West Bengal                            | 0.538           | Low-middle SDI      |
| Union Territories other than Delhi     | 0.653           | Middle SDI          |
| Nepal                                  | 0.429           | Low SDI             |
| Pakistan                               | 0.492           | Low-middle SDI      |
| Southeast Asia, East Asia, and Oceania | 0.685           |                     |

**Appendix Table 19. Socio-demographic Index groupings by geography, based on 2017 values**

| <b>Geography</b>               | <b>2017 SDI</b> | <b>SDI Quintile</b> |
|--------------------------------|-----------------|---------------------|
| East Asia                      | 0.709           |                     |
| China                          | 0.707           | High-middle SDI     |
| North Korea                    | 0.538           | Low-middle SDI      |
| Taiwan (Province of China)     | 0.864           | High SDI            |
| Oceania                        | 0.471           |                     |
| American Samoa                 | 0.702           | High-middle SDI     |
| Federated States of Micronesia | 0.575           | Low-middle SDI      |
| Fiji                           | 0.641           | Middle SDI          |
| Guam                           | 0.794           | High-middle SDI     |
| Kiribati                       | 0.427           | Low SDI             |
| Marshall Islands               | 0.55            | Low-middle SDI      |
| Northern Mariana Islands       | 0.758           | High-middle SDI     |
| Papua New Guinea               | 0.419           | Low SDI             |
| Samoa                          | 0.576           | Low-middle SDI      |
| Solomon Islands                | 0.425           | Low SDI             |
| Tonga                          | 0.625           | Middle SDI          |
| Vanuatu                        | 0.475           | Low-middle SDI      |
| Southeast Asia                 | 0.641           |                     |
| Cambodia                       | 0.482           | Low-middle SDI      |
| Indonesia                      | 0.648           | Middle SDI          |
| Laos                           | 0.519           | Low-middle SDI      |
| Malaysia                       | 0.759           | High-middle SDI     |
| Maldives                       | 0.655           | Middle SDI          |
| Mauritius                      | 0.72            | High-middle SDI     |
| Myanmar                        | 0.556           | Low-middle SDI      |
| Philippines                    | 0.617           | Middle SDI          |
| Sri Lanka                      | 0.68            | Middle SDI          |
| Seychelles                     | 0.692           | Middle SDI          |
| Thailand                       | 0.684           | Middle SDI          |
| Timor-Leste                    | 0.505           | Low-middle SDI      |
| Vietnam                        | 0.607           | Middle SDI          |
| Sub-Saharan Africa             | 0.446           |                     |
| Central sub-Saharan Africa     | 0.457           |                     |
| Angola                         | 0.461           | Low-middle SDI      |
| Central African Republic       | 0.334           | Low SDI             |
| Congo (Brazzaville)            | 0.574           | Low-middle SDI      |
| DR Congo                       | 0.364           | Low SDI             |
| Equatorial Guinea              | 0.625           | Middle SDI          |
| Gabon                          | 0.651           | Middle SDI          |
| Eastern sub-Saharan Africa     | 0.387           |                     |
| Burundi                        | 0.31            | Low SDI             |
| Comoros                        | 0.434           | Low SDI             |
| Djibouti                       | 0.485           | Low-middle SDI      |
| Eritrea                        | 0.409           | Low SDI             |
| Ethiopia                       | 0.334           | Low SDI             |

**Appendix Table 19. Socio-demographic Index groupings by geography, based on 2017 values**

| <b>Geography</b> | <b>2017 SDI</b> | <b>SDI Quintile</b> |
|------------------|-----------------|---------------------|
| Kenya            | 0.499           | Low-middle SDI      |
| Baringo          | 0.444           | Low-middle SDI      |
| Bomet            | 0.496           | Low-middle SDI      |
| Bungoma          | 0.463           | Low-middle SDI      |
| Busia            | 0.438           | Low-middle SDI      |
| Elgeyo Marakwet  | 0.496           | Low-middle SDI      |
| Embu             | 0.533           | Low-middle SDI      |
| Garissa          | 0.334           | Low-middle SDI      |
| Homa Bay         | 0.425           | Low-middle SDI      |
| Isiolo           | 0.385           | Low-middle SDI      |
| Kajiado          | 0.534           | Low-middle SDI      |
| Kakamega         | 0.45            | Low-middle SDI      |
| Kericho          | 0.5             | Low-middle SDI      |
| Kiambu           | 0.58            | Low-middle SDI      |
| Kilifi           | 0.456           | Low-middle SDI      |
| Kirinyaga        | 0.533           | Low-middle SDI      |
| Kisii            | 0.522           | Low-middle SDI      |
| Kisumu           | 0.503           | Low-middle SDI      |
| Kitui            | 0.461           | Low-middle SDI      |
| Kwale            | 0.457           | Low-middle SDI      |
| Laikipia         | 0.556           | Low-middle SDI      |
| Lamu             | 0.453           | Low-middle SDI      |
| Machakos         | 0.518           | Low-middle SDI      |
| Makueni          | 0.469           | Low-middle SDI      |
| Mandera          | 0.295           | Low-middle SDI      |
| Marsabit         | 0.34            | Low-middle SDI      |
| Meru             | 0.508           | Low-middle SDI      |
| Migori           | 0.419           | Low-middle SDI      |
| Mombasa          | 0.568           | Low-middle SDI      |
| Murang'a         | 0.528           | Low-middle SDI      |
| Nairobi          | 0.674           | Low-middle SDI      |
| Nakuru           | 0.545           | Low-middle SDI      |
| Nandi            | 0.501           | Low-middle SDI      |
| Narok            | 0.402           | Low-middle SDI      |
| Nyamira          | 0.544           | Low-middle SDI      |
| Nyandarua        | 0.534           | Low-middle SDI      |
| Nyeri            | 0.554           | Low-middle SDI      |
| Samburu          | 0.308           | Low-middle SDI      |
| Siaya            | 0.46            | Low-middle SDI      |
| Taita Taveta     | 0.529           | Low-middle SDI      |
| Tana River       | 0.379           | Low-middle SDI      |
| Tharaka Nithi    | 0.528           | Low-middle SDI      |
| Trans Nzoia      | 0.496           | Low-middle SDI      |
| Turkana          | 0.295           | Low-middle SDI      |
| Uasin Gishu      | 0.545           | Low-middle SDI      |

**Appendix Table 19. Socio-demographic Index groupings by geography, based on 2017 values**

| <b>Geography</b>            | <b>2017 SDI</b> | <b>SDI Quintile</b> |
|-----------------------------|-----------------|---------------------|
| Vihiga                      | 0.477           | Low-middle SDI      |
| Wajir                       | 0.243           | Low-middle SDI      |
| West Pokot                  | 0.382           | Low-middle SDI      |
| Madagascar                  | 0.331           | Low SDI             |
| Malawi                      | 0.349           | Low SDI             |
| Mozambique                  | 0.34            | Low SDI             |
| Rwanda                      | 0.407           | Low SDI             |
| Somalia                     | 0.235           | Low SDI             |
| South Sudan                 | 0.275           | Low SDI             |
| Tanzania                    | 0.412           | Low SDI             |
| Uganda                      | 0.388           | Low SDI             |
| Zambia                      | 0.472           | Low-middle SDI      |
| Southern sub-Saharan Africa | 0.64            |                     |
| Botswana                    | 0.663           | Middle SDI          |
| Lesotho                     | 0.493           | Low-middle SDI      |
| Namibia                     | 0.616           | Middle SDI          |
| South Africa                | 0.677           | Middle SDI          |
| Swaziland                   | 0.578           | Low-middle SDI      |
| Zimbabwe                    | 0.463           | Low-middle SDI      |
| Western sub-Saharan Africa  | 0.441           |                     |
| Benin                       | 0.373           | Low SDI             |
| Burkina Faso                | 0.284           | Low SDI             |
| Cameroon                    | 0.482           | Low-middle SDI      |
| Cape Verde                  | 0.549           | Low-middle SDI      |
| Chad                        | 0.253           | Low SDI             |
| Cote d'Ivoire               | 0.412           | Low SDI             |
| The Gambia                  | 0.405           | Low SDI             |
| Ghana                       | 0.537           | Low-middle SDI      |
| Guinea                      | 0.325           | Low SDI             |
| Guinea-Bissau               | 0.349           | Low SDI             |
| Liberia                     | 0.328           | Low SDI             |
| Mali                        | 0.267           | Low SDI             |
| Mauritania                  | 0.471           | Low-middle SDI      |
| Niger                       | 0.191           | Low SDI             |
| Nigeria                     | 0.493           | Low-middle SDI      |
| Sao Tome and Principe       | 0.488           | Low-middle SDI      |
| Senegal                     | 0.373           | Low SDI             |
| Sierra Leone                | 0.357           | Low SDI             |
| Togo                        | 0.413           | Low SDI             |

Appendix Table 20. Socio-demographic Index values for all estimated GBD 2017 locations, 1980–2017

| Location                                         | 1980  | 1981  | 1982  | 1983  | 1984  | 1985  | 1986  | 1987  | 1988  | 1989  | 1990  | 1991  | 1992  | 1993  | 1994  | 1995  | 1996  | 1997  | 1998  | 1999  | 2000  | 2001  | 2002  | 2003  | 2004  | 2005  | 2006  | 2007  | 2008  | 2009  | 2010  | 2011  | 2012  | 2013  | 2014  | 2015  | 2016  | 2017  |       |
|--------------------------------------------------|-------|-------|-------|-------|-------|-------|-------|-------|-------|-------|-------|-------|-------|-------|-------|-------|-------|-------|-------|-------|-------|-------|-------|-------|-------|-------|-------|-------|-------|-------|-------|-------|-------|-------|-------|-------|-------|-------|-------|
| Global                                           | 0.482 | 0.486 | 0.488 | 0.491 | 0.494 | 0.498 | 0.501 | 0.507 | 0.513 | 0.518 | 0.523 | 0.529 | 0.534 | 0.539 | 0.543 | 0.548 | 0.553 | 0.557 | 0.561 | 0.566 | 0.571 | 0.576 | 0.581 | 0.585 | 0.59  | 0.595 | 0.601 | 0.606 | 0.611 | 0.616 | 0.62  | 0.624 | 0.628 | 0.633 | 0.639 | 0.644 | 0.647 | 0.652 |       |
| Central Europe, Eastern Europe, and Central Asia | 0.629 | 0.632 | 0.632 | 0.633 | 0.635 | 0.637 | 0.64  | 0.643 | 0.647 | 0.651 | 0.656 | 0.662 | 0.67  | 0.674 | 0.677 | 0.682 | 0.686 | 0.689 | 0.691 | 0.694 | 0.698 | 0.701 | 0.705 | 0.709 | 0.715 | 0.72  | 0.725 | 0.73  | 0.735 | 0.739 | 0.743 | 0.747 | 0.75  | 0.753 | 0.757 | 0.76  | 0.763 | 0.766 |       |
| Central Asia                                     | 0.532 | 0.536 | 0.538 | 0.541 | 0.543 | 0.545 | 0.548 | 0.552 | 0.556 | 0.56  | 0.563 | 0.567 | 0.57  | 0.573 | 0.575 | 0.577 | 0.578 | 0.579 | 0.58  | 0.582 | 0.585 | 0.588 | 0.593 | 0.598 | 0.603 | 0.609 | 0.615 | 0.621 | 0.627 | 0.633 | 0.639 | 0.644 | 0.649 | 0.654 | 0.659 | 0.664 | 0.669 | 0.673 |       |
| Armenia                                          | 0.546 | 0.546 | 0.546 | 0.546 | 0.545 | 0.545 | 0.548 | 0.547 | 0.549 | 0.552 | 0.555 | 0.559 | 0.56  | 0.562 | 0.565 | 0.567 | 0.57  | 0.573 | 0.577 | 0.581 | 0.586 | 0.592 | 0.6   | 0.601 | 0.603 | 0.609 | 0.615 | 0.621 | 0.626 | 0.631 | 0.636 | 0.641 | 0.646 | 0.651 | 0.656 | 0.661 | 0.666 | 0.671 |       |
| Azerbaijan                                       | 0.584 | 0.589 | 0.593 | 0.596 | 0.599 | 0.601 | 0.604 | 0.606 | 0.608 | 0.61  | 0.611 | 0.614 | 0.616 | 0.617 | 0.616 | 0.613 | 0.61  | 0.607 | 0.604 | 0.601 | 0.6   | 0.6   | 0.602 | 0.605 | 0.608 | 0.615 | 0.625 | 0.635 | 0.645 | 0.654 | 0.664 | 0.672 | 0.678 | 0.684 | 0.689 | 0.694 | 0.698 | 0.701 |       |
| Georgia                                          | 0.618 | 0.62  | 0.627 | 0.629 | 0.63  | 0.633 | 0.639 | 0.645 | 0.651 | 0.656 | 0.661 | 0.666 | 0.671 | 0.676 | 0.681 | 0.685 | 0.689 | 0.693 | 0.694 | 0.693 | 0.693 | 0.693 | 0.693 | 0.693 | 0.693 | 0.693 | 0.693 | 0.693 | 0.693 | 0.693 | 0.693 | 0.693 | 0.693 | 0.693 | 0.693 | 0.693 | 0.693 | 0.693 |       |
| Kazakhstan                                       | 0.584 | 0.588 | 0.591 | 0.593 | 0.594 | 0.595 | 0.598 | 0.602 | 0.606 | 0.61  | 0.613 | 0.615 | 0.619 | 0.625 | 0.632 | 0.638 | 0.643 | 0.645 | 0.646 | 0.647 | 0.651 | 0.656 | 0.661 | 0.666 | 0.671 | 0.677 | 0.683 | 0.689 | 0.696 | 0.702 | 0.705 | 0.707 | 0.708 | 0.711 | 0.716 | 0.723 | 0.73  | 0.735 |       |
| Kyrgyzstan                                       | 0.531 | 0.532 | 0.533 | 0.536 | 0.54  | 0.543 | 0.547 | 0.552 | 0.557 | 0.56  | 0.565 | 0.571 | 0.576 | 0.578 | 0.577 | 0.572 | 0.569 | 0.567 | 0.564 | 0.562 | 0.56  | 0.559 | 0.56  | 0.562 | 0.565 | 0.566 | 0.567 | 0.569 | 0.572 | 0.575 | 0.576 | 0.581 | 0.584 | 0.589 | 0.594 | 0.598 | 0.603 | 0.607 |       |
| Mongolia                                         | 0.472 | 0.479 | 0.486 | 0.492 | 0.498 | 0.503 | 0.509 | 0.516 | 0.523 | 0.529 | 0.537 | 0.545 | 0.55  | 0.555 | 0.559 | 0.564 | 0.569 | 0.573 | 0.577 | 0.581 | 0.585 | 0.589 | 0.594 | 0.598 | 0.603 | 0.608 | 0.614 | 0.619 | 0.624 | 0.628 | 0.632 | 0.636 | 0.641 | 0.646 | 0.651 | 0.656 | 0.661 | 0.666 |       |
| Tajikistan                                       | 0.403 | 0.412 | 0.419 | 0.425 | 0.43  | 0.436 | 0.444 | 0.455 | 0.464 | 0.469 | 0.474 | 0.481 | 0.485 | 0.487 | 0.486 | 0.481 | 0.474 | 0.468 | 0.463 | 0.459 | 0.455 | 0.454 | 0.456 | 0.462 | 0.465 | 0.466 | 0.472 | 0.479 | 0.483 | 0.488 | 0.494 | 0.501 | 0.506 | 0.51  | 0.514 | 0.517 | 0.52  | 0.523 |       |
| Turkmenistan                                     | 0.546 | 0.55  | 0.554 | 0.558 | 0.562 | 0.565 | 0.569 | 0.574 | 0.579 | 0.584 | 0.588 | 0.592 | 0.594 | 0.599 | 0.602 | 0.604 | 0.606 | 0.606 | 0.606 | 0.607 | 0.61  | 0.613 | 0.617 | 0.622 | 0.628 | 0.635 | 0.638 | 0.641 | 0.644 | 0.647 | 0.651 | 0.657 | 0.663 | 0.669 | 0.678 | 0.685 | 0.691 | 0.696 |       |
| Uzbekistan                                       | 0.437 | 0.442 | 0.446 | 0.45  | 0.454 | 0.458 | 0.463 | 0.467 | 0.472 | 0.477 | 0.481 | 0.484 | 0.487 | 0.493 | 0.497 | 0.502 | 0.508 | 0.513 | 0.52  | 0.526 | 0.532 | 0.537 | 0.543 | 0.549 | 0.555 | 0.56  | 0.565 | 0.57  | 0.575 | 0.581 | 0.587 | 0.592 | 0.598 | 0.604 | 0.611 | 0.618 | 0.624 | 0.63  |       |
| Central Europe                                   | 0.622 | 0.626 | 0.629 | 0.631 | 0.633 | 0.637 | 0.641 | 0.646 | 0.651 | 0.658 | 0.665 | 0.671 | 0.677 | 0.683 | 0.69  | 0.698 | 0.705 | 0.711 | 0.717 | 0.723 | 0.731 | 0.738 | 0.745 | 0.751 | 0.757 | 0.762 | 0.767 | 0.772 | 0.776 | 0.782 | 0.788 | 0.793 | 0.797 | 0.802 | 0.805 | 0.808 | 0.811 | 0.814 |       |
| Albania                                          | 0.519 | 0.526 | 0.532 | 0.535 | 0.537 | 0.541 | 0.546 | 0.549 | 0.549 | 0.548 | 0.548 | 0.545 | 0.542 | 0.541 | 0.542 | 0.546 | 0.552 | 0.558 | 0.566 | 0.577 | 0.584 | 0.593 | 0.602 | 0.611 | 0.619 | 0.627 | 0.635 | 0.642 | 0.648 | 0.653 | 0.658 | 0.661 | 0.665 | 0.668 | 0.672 | 0.676 | 0.681 | 0.685 |       |
| Bosnia and Herzegovina                           | 0.452 | 0.458 | 0.465 | 0.47  | 0.475 | 0.48  | 0.484 | 0.489 | 0.492 | 0.495 | 0.497 | 0.499 | 0.5   | 0.501 | 0.507 | 0.525 | 0.549 | 0.571 | 0.592 | 0.607 | 0.619 | 0.63  | 0.639 | 0.647 | 0.654 | 0.66  | 0.667 | 0.673 | 0.679 | 0.685 | 0.69  | 0.694 | 0.699 | 0.703 | 0.706 | 0.71  | 0.713 |       |       |
| Bulgaria                                         | 0.596 | 0.601 | 0.605 | 0.61  | 0.617 | 0.621 | 0.624 | 0.628 | 0.635 | 0.646 | 0.658 | 0.668 | 0.676 | 0.684 | 0.693 | 0.699 | 0.705 | 0.706 | 0.704 | 0.703 | 0.708 | 0.715 | 0.721 | 0.726 | 0.731 | 0.736 | 0.741 | 0.746 | 0.751 | 0.757 | 0.765 | 0.771 | 0.775 | 0.78  | 0.784 | 0.788 | 0.792 |       |       |
| Croatia                                          | 0.672 | 0.678 | 0.683 | 0.688 | 0.692 | 0.697 | 0.702 | 0.707 | 0.713 | 0.719 | 0.725 | 0.73  | 0.732 | 0.732 | 0.731 | 0.731 | 0.732 | 0.733 | 0.743 | 0.749 | 0.755 | 0.762 | 0.768 | 0.773 | 0.778 | 0.782 | 0.787 | 0.792 | 0.797 | 0.801 | 0.805 | 0.809 | 0.813 | 0.816 | 0.818 | 0.821 | 0.823 | 0.825 |       |
| Czech Republic                                   | 0.677 | 0.681 | 0.683 | 0.686 | 0.688 | 0.692 | 0.697 | 0.701 | 0.704 | 0.708 | 0.711 | 0.717 | 0.726 | 0.74  | 0.757 | 0.769 | 0.777 | 0.783 | 0.788 | 0.794 | 0.799 | 0.804 | 0.809 | 0.813 | 0.814 | 0.819 | 0.823 | 0.827 | 0.83  | 0.833 | 0.836 | 0.84  | 0.843 | 0.846 | 0.847 | 0.848 | 0.849 | 0.851 |       |
| Hungary                                          | 0.624 | 0.633 | 0.642 | 0.648 | 0.65  | 0.653 | 0.658 | 0.664 | 0.67  | 0.675 | 0.678 | 0.683 | 0.691 | 0.699 | 0.707 | 0.716 | 0.724 | 0.732 | 0.739 | 0.745 | 0.751 | 0.758 | 0.764 | 0.77  | 0.776 | 0.781 | 0.786 | 0.791 | 0.795 | 0.799 | 0.803 | 0.806 | 0.807 | 0.808 | 0.809 | 0.811 | 0.814 | 0.817 |       |
| Macedonia                                        | 0.588 | 0.594 | 0.598 | 0.601 | 0.605 | 0.61  | 0.614 | 0.617 | 0.62  | 0.623 | 0.626 | 0.629 | 0.63  | 0.631 | 0.632 | 0.635 | 0.64  | 0.647 | 0.654 | 0.661 | 0.667 | 0.673 | 0.678 | 0.683 | 0.689 | 0.694 | 0.699 | 0.704 | 0.709 | 0.714 | 0.719 | 0.724 | 0.729 | 0.734 | 0.739 | 0.744 | 0.748 | 0.751 | 0.754 |
| Montenegro                                       | 0.687 | 0.689 | 0.691 | 0.692 | 0.694 | 0.696 | 0.698 | 0.699 | 0.701 | 0.704 | 0.705 | 0.706 | 0.705 | 0.701 | 0.698 | 0.696 | 0.696 | 0.698 | 0.7   | 0.703 | 0.706 | 0.711 | 0.716 | 0.721 | 0.726 | 0.731 | 0.737 | 0.743 | 0.75  | 0.756 | 0.761 | 0.767 | 0.771 | 0.775 | 0.779 | 0.782 | 0.785 | 0.788 |       |
| Poland                                           | 0.636 | 0.635 | 0.63  | 0.63  | 0.633 | 0.639 | 0.645 | 0.649 | 0.654 | 0.659 | 0.662 | 0.668 | 0.678 | 0.686 | 0.697 | 0.707 | 0.714 | 0.724 | 0.733 | 0.741 | 0.75  | 0.759 | 0.767 | 0.773 | 0.779 | 0.784 | 0.789 | 0.792 | 0.797 | 0.804 | 0.811 | 0.818 | 0.823 | 0.829 | 0.833 | 0.837 | 0.841 | 0.844 |       |
| Romania                                          | 0.58  | 0.589 | 0.601 | 0.604 | 0.604 | 0.604 | 0.606 | 0.611 | 0.62  | 0.636 | 0.652 | 0.66  | 0.663 | 0.666 | 0.671 | 0.678 | 0.682 | 0.685 | 0.691 | 0.697 | 0.704 | 0.71  | 0.717 | 0.723 | 0.729 | 0.734 | 0.74  | 0.745 | 0.751 | 0.758 | 0.763 | 0.768 | 0.772 | 0.774 | 0.777 | 0.78  | 0.784 |       |       |
| Serbia                                           | 0.601 | 0.604 | 0.604 | 0.605 | 0.608 | 0.612 | 0.615 | 0.617 | 0.622 | 0.627 | 0.632 | 0.638 | 0.643 | 0.642 | 0.641 | 0.643 | 0.648 | 0.653 | 0.655 | 0.661 | 0.665 | 0.669 | 0.673 | 0.678 | 0.684 | 0.692 | 0.699 | 0.705 | 0.709 | 0.713 | 0.718 | 0.723 | 0.729 | 0.736 | 0.742 | 0.747 | 0.75  | 0.752 |       |
| Slovakia                                         | 0.652 | 0.655 | 0.657 | 0.658 | 0.659 | 0.663 | 0.669 | 0.674 | 0.679 | 0.681 | 0.684 | 0.689 | 0.699 | 0.71  | 0.722 | 0.732 | 0.74  | 0.748 | 0.756 | 0.764 | 0.772 | 0.779 | 0.784 | 0.788 | 0.794 | 0.804 | 0.809 | 0.814 | 0.818 | 0.823 | 0.828 | 0.832 | 0.834 | 0.836 | 0.838 | 0.839 | 0.841 | 0.842 |       |
| Slovenia                                         | 0.685 | 0.691 | 0.697 | 0.704 | 0.71  | 0.714 | 0.718 | 0.724 | 0.73  | 0.736 | 0.741 | 0.747 | 0.753 | 0.759 | 0.764 | 0.769 | 0.775 | 0.781 | 0.788 | 0.794 | 0.801 | 0.808 | 0.814 | 0.819 | 0.824 | 0.828 | 0.833 | 0.837 | 0.841 | 0.843 | 0.846 | 0.848 | 0.85  | 0.852 | 0.854 | 0.856 | 0.858 | 0.86  |       |
| Eastern Europe                                   | 0.655 | 0.658 | 0.657 | 0.658 | 0.66  | 0.662 | 0.664 | 0.666 | 0.671 | 0.674 | 0.678 | 0.685 | 0.694 | 0.698 | 0.7   | 0.704 | 0.708 | 0.708 | 0.71  | 0.711 | 0.712 | 0.713 | 0.715 | 0.72  | 0.727 | 0.734 | 0.739 | 0.745 | 0.751 | 0.756 | 0.761 | 0.764 | 0.767 | 0.772 | 0.776 | 0.779 | 0.783 | 0.785 |       |
| Belarus                                          | 0.59  | 0.592 | 0.593 | 0.595 | 0.597 | 0.601 | 0.605 | 0.609 | 0.615 | 0.62  | 0.625 | 0.631 | 0.636 | 0.641 | 0.645 | 0.647 | 0.65  | 0.654 | 0.657 | 0.661 | 0.665 | 0.67  | 0.676 | 0.682 | 0.689 | 0.696 | 0.704 | 0.712 | 0.72  | 0.727 | 0.733 | 0.74  | 0.747 | 0.753 | 0.759 | 0.764 | 0.769 | 0.773 |       |
| Estonia                                          | 0.69  | 0.689 | 0.69  | 0.694 | 0.696 | 0.695 | 0.692 | 0.692 | 0.699 | 0.705 | 0.711 | 0.719 | 0.728 | 0.736 | 0.742 | 0.746 | 0.75  | 0.755 | 0.761 | 0.766 | 0.772 | 0.778 | 0.783 | 0.788 | 0.794 | 0.799 | 0.806 | 0.813 | 0.82  | 0.826 | 0.832 | 0.838 | 0.843 | 0.847 | 0.851 | 0.854 | 0.856 | 0.858 |       |
| Latvia                                           | 0.681 | 0.681 | 0.68  | 0.681 | 0.683 | 0.683 | 0.683 | 0.683 | 0.685 | 0.689 | 0.693 | 0.696 | 0.703 | 0.712 | 0.721 | 0.731 | 0.733 | 0.734 | 0.735 | 0.738 | 0.741 | 0.745 | 0.75  | 0.757 | 0.763 | 0.769 | 0.776 | 0.783 | 0.792 | 0.8   | 0.806 | 0.81  | 0.814 | 0.817 | 0.819 | 0.822 | 0.825 |       |       |
| Lithuania                                        | 0.701 | 0.705 | 0.707 | 0.708 | 0.709 | 0.711 | 0.712 | 0.712 | 0.71  | 0.709 | 0.707 | 0.71  | 0.717 | 0.725 | 0.728 | 0.733 | 0.736 |       |       |       |       |       |       |       |       |       |       |       |       |       |       |       |       |       |       |       |       |       |       |

Appendix Table 20. Socio-demographic Index values for all estimated GBD 2017 locations, 1980–2017

| Location                  | 1980  | 1981  | 1982  | 1983  | 1984  | 1985  | 1986  | 1987  | 1988  | 1989  | 1990  | 1991  | 1992  | 1993  | 1994  | 1995  | 1996  | 1997  | 1998  | 1999  | 2000  | 2001  | 2002  | 2003  | 2004  | 2005  | 2006  | 2007  | 2008  | 2009  | 2010  | 2011  | 2012  | 2013  | 2014  | 2015  | 2016  | 2017  |       |
|---------------------------|-------|-------|-------|-------|-------|-------|-------|-------|-------|-------|-------|-------|-------|-------|-------|-------|-------|-------|-------|-------|-------|-------|-------|-------|-------|-------|-------|-------|-------|-------|-------|-------|-------|-------|-------|-------|-------|-------|-------|
| Oita                      | 0.755 | 0.74  | 0.744 | 0.748 | 0.754 | 0.759 | 0.764 | 0.769 | 0.774 | 0.78  | 0.785 | 0.789 | 0.795 | 0.802 | 0.808 | 0.809 | 0.809 | 0.81  | 0.812 | 0.813 | 0.815 | 0.816 | 0.819 | 0.821 | 0.824 | 0.825 | 0.827 | 0.828 | 0.83  | 0.831 | 0.833 | 0.835 | 0.838 | 0.84  | 0.842 | 0.843 | 0.844 | 0.846 |       |
| Okayama                   | 0.737 | 0.742 | 0.745 | 0.749 | 0.755 | 0.761 | 0.766 | 0.772 | 0.778 | 0.784 | 0.79  | 0.794 | 0.799 | 0.803 | 0.807 | 0.811 | 0.814 | 0.817 | 0.819 | 0.821 | 0.823 | 0.824 | 0.827 | 0.829 | 0.832 | 0.834 | 0.836 | 0.837 | 0.839 | 0.841 | 0.843 | 0.846 | 0.848 | 0.85  | 0.852 | 0.853 | 0.854 | 0.856 |       |
| Okinawa                   | 0.698 | 0.703 | 0.707 | 0.711 | 0.717 | 0.723 | 0.729 | 0.735 | 0.742 | 0.748 | 0.753 | 0.757 | 0.764 | 0.772 | 0.778 | 0.779 | 0.777 | 0.777 | 0.778 | 0.78  | 0.781 | 0.783 | 0.786 | 0.789 | 0.793 | 0.795 | 0.797 | 0.799 | 0.8   | 0.802 | 0.804 | 0.807 | 0.809 | 0.812 | 0.814 | 0.815 | 0.816 | 0.818 |       |
| Osaka                     | 0.77  | 0.774 | 0.777 | 0.781 | 0.785 | 0.789 | 0.794 | 0.799 | 0.804 | 0.81  | 0.815 | 0.819 | 0.823 | 0.827 | 0.831 | 0.834 | 0.837 | 0.84  | 0.842 | 0.844 | 0.845 | 0.847 | 0.849 | 0.851 | 0.853 | 0.854 | 0.856 | 0.858 | 0.859 | 0.861 | 0.863 | 0.865 | 0.867 | 0.868 | 0.87  | 0.871 | 0.872 |       |       |
| Saga                      | 0.724 | 0.729 | 0.732 | 0.736 | 0.742 | 0.747 | 0.751 | 0.757 | 0.762 | 0.768 | 0.773 | 0.777 | 0.782 | 0.785 | 0.788 | 0.792 | 0.795 | 0.797 | 0.799 | 0.8   | 0.801 | 0.803 | 0.805 | 0.808 | 0.81  | 0.812 | 0.814 | 0.815 | 0.817 | 0.819 | 0.821 | 0.823 | 0.825 | 0.827 | 0.83  | 0.831 | 0.832 | 0.834 |       |
| Saitama                   | 0.746 | 0.754 | 0.757 | 0.763 | 0.767 | 0.772 | 0.777 | 0.783 | 0.788 | 0.793 | 0.798 | 0.802 | 0.806 | 0.81  | 0.814 | 0.818 | 0.822 | 0.826 | 0.83  | 0.832 | 0.834 | 0.836 | 0.838 | 0.839 | 0.841 | 0.843 | 0.845 | 0.847 | 0.848 | 0.849 | 0.85  | 0.851 | 0.853 | 0.854 | 0.856 | 0.857 | 0.858 |       |       |
| Shiga                     | 0.753 | 0.758 | 0.761 | 0.765 | 0.77  | 0.775 | 0.78  | 0.786 | 0.792 | 0.798 | 0.804 | 0.809 | 0.814 | 0.819 | 0.823 | 0.827 | 0.83  | 0.833 | 0.836 | 0.838 | 0.84  | 0.841 | 0.843 | 0.846 | 0.848 | 0.85  | 0.852 | 0.853 | 0.855 | 0.857 | 0.858 | 0.861 | 0.863 | 0.865 | 0.867 | 0.868 | 0.869 | 0.871 |       |
| Shimane                   | 0.713 | 0.718 | 0.722 | 0.725 | 0.731 | 0.736 | 0.74  | 0.746 | 0.751 | 0.757 | 0.762 | 0.766 | 0.771 | 0.775 | 0.779 | 0.783 | 0.787 | 0.79  | 0.793 | 0.795 | 0.797 | 0.798 | 0.801 | 0.803 | 0.806 | 0.808 | 0.81  | 0.812 | 0.814 | 0.816 | 0.818 | 0.82  | 0.823 | 0.825 | 0.827 | 0.828 | 0.829 | 0.831 |       |
| Shizuoka                  | 0.747 | 0.752 | 0.755 | 0.759 | 0.764 | 0.77  | 0.774 | 0.78  | 0.786 | 0.792 | 0.798 | 0.802 | 0.807 | 0.811 | 0.814 | 0.818 | 0.821 | 0.823 | 0.825 | 0.826 | 0.827 | 0.828 | 0.83  | 0.833 | 0.835 | 0.837 | 0.838 | 0.84  | 0.842 | 0.843 | 0.846 | 0.848 | 0.85  | 0.853 | 0.855 | 0.856 | 0.857 | 0.859 |       |
| Tochigi                   | 0.738 | 0.743 | 0.746 | 0.749 | 0.754 | 0.759 | 0.764 | 0.77  | 0.776 | 0.782 | 0.787 | 0.792 | 0.797 | 0.801 | 0.805 | 0.809 | 0.813 | 0.815 | 0.817 | 0.819 | 0.82  | 0.821 | 0.823 | 0.826 | 0.829 | 0.831 | 0.832 | 0.834 | 0.836 | 0.838 | 0.84  | 0.842 | 0.845 | 0.847 | 0.849 | 0.85  | 0.851 | 0.853 |       |
| Tokushima                 | 0.725 | 0.729 | 0.732 | 0.736 | 0.742 | 0.748 | 0.753 | 0.758 | 0.765 | 0.771 | 0.776 | 0.781 | 0.786 | 0.79  | 0.794 | 0.798 | 0.802 | 0.805 | 0.807 | 0.809 | 0.812 | 0.814 | 0.816 | 0.819 | 0.822 | 0.824 | 0.826 | 0.828 | 0.83  | 0.831 | 0.833 | 0.835 | 0.837 | 0.839 | 0.841 | 0.842 | 0.843 | 0.845 |       |
| Tokyo                     | 0.83  | 0.834 | 0.837 | 0.84  | 0.844 | 0.848 | 0.852 | 0.856 | 0.861 | 0.866 | 0.87  | 0.875 | 0.879 | 0.883 | 0.887 | 0.892 | 0.896 | 0.899 | 0.901 | 0.903 | 0.905 | 0.906 | 0.908 | 0.91  | 0.911 | 0.913 | 0.914 | 0.915 | 0.916 | 0.917 | 0.918 | 0.919 | 0.92  | 0.921 | 0.922 | 0.923 | 0.924 |       |       |
| Tottori                   | 0.721 | 0.726 | 0.729 | 0.733 | 0.739 | 0.744 | 0.749 | 0.754 | 0.76  | 0.766 | 0.77  | 0.775 | 0.78  | 0.783 | 0.787 | 0.791 | 0.794 | 0.797 | 0.799 | 0.801 | 0.802 | 0.804 | 0.806 | 0.808 | 0.811 | 0.813 | 0.814 | 0.816 | 0.818 | 0.819 | 0.821 | 0.824 | 0.826 | 0.828 | 0.831 | 0.832 | 0.833 | 0.834 |       |
| Toyama                    | 0.733 | 0.738 | 0.743 | 0.747 | 0.753 | 0.759 | 0.765 | 0.771 | 0.778 | 0.785 | 0.79  | 0.795 | 0.8   | 0.805 | 0.808 | 0.812 | 0.816 | 0.818 | 0.821 | 0.823 | 0.825 | 0.827 | 0.829 | 0.832 | 0.835 | 0.837 | 0.839 | 0.841 | 0.843 | 0.845 | 0.847 | 0.849 | 0.852 | 0.854 | 0.856 | 0.857 | 0.858 | 0.86  |       |
| Wakayama                  | 0.721 | 0.723 | 0.726 | 0.73  | 0.738 | 0.744 | 0.75  | 0.757 | 0.763 | 0.77  | 0.775 | 0.78  | 0.785 | 0.789 | 0.792 | 0.796 | 0.8   | 0.802 | 0.805 | 0.806 | 0.808 | 0.81  | 0.812 | 0.815 | 0.817 | 0.819 | 0.821 | 0.822 | 0.824 | 0.825 | 0.827 | 0.829 | 0.831 | 0.833 | 0.836 | 0.837 | 0.838 | 0.84  |       |
| Yamagata                  | 0.715 | 0.72  | 0.725 | 0.729 | 0.734 | 0.74  | 0.744 | 0.75  | 0.756 | 0.761 | 0.766 | 0.77  | 0.775 | 0.778 | 0.782 | 0.785 | 0.788 | 0.791 | 0.792 | 0.794 | 0.795 | 0.796 | 0.799 | 0.802 | 0.805 | 0.807 | 0.809 | 0.812 | 0.814 | 0.816 | 0.819 | 0.821 | 0.824 | 0.826 | 0.828 | 0.829 | 0.83  | 0.832 |       |
| Yamaguchi                 | 0.742 | 0.746 | 0.75  | 0.753 | 0.759 | 0.764 | 0.768 | 0.774 | 0.78  | 0.786 | 0.79  | 0.794 | 0.799 | 0.802 | 0.806 | 0.809 | 0.812 | 0.815 | 0.817 | 0.819 | 0.82  | 0.822 | 0.824 | 0.826 | 0.828 | 0.83  | 0.831 | 0.832 | 0.834 | 0.835 | 0.837 | 0.839 | 0.841 | 0.843 | 0.846 | 0.847 | 0.848 | 0.849 |       |
| Yamanashi                 | 0.748 | 0.753 | 0.756 | 0.76  | 0.764 | 0.769 | 0.772 | 0.777 | 0.782 | 0.787 | 0.791 | 0.796 | 0.8   | 0.804 | 0.808 | 0.812 | 0.815 | 0.818 | 0.82  | 0.822 | 0.823 | 0.825 | 0.827 | 0.829 | 0.832 | 0.834 | 0.836 | 0.837 | 0.839 | 0.841 | 0.842 | 0.844 | 0.846 | 0.848 | 0.85  | 0.851 | 0.853 | 0.854 |       |
| South Korea               | 0.605 | 0.611 | 0.623 | 0.636 | 0.647 | 0.659 | 0.671 | 0.682 | 0.692 | 0.702 | 0.713 | 0.724 | 0.733 | 0.742 | 0.751 | 0.76  | 0.768 | 0.777 | 0.783 | 0.79  | 0.799 | 0.806 | 0.814 | 0.82  | 0.825 | 0.83  | 0.834 | 0.839 | 0.843 | 0.846 | 0.85  | 0.853 | 0.857 | 0.86  | 0.864 | 0.867 | 0.869 | 0.872 |       |
| Singapore                 | 0.662 | 0.669 | 0.678 | 0.687 | 0.694 | 0.702 | 0.71  | 0.715 | 0.722 | 0.729 | 0.736 | 0.744 | 0.75  | 0.758 | 0.765 | 0.772 | 0.78  | 0.786 | 0.79  | 0.797 | 0.808 | 0.815 | 0.82  | 0.824 | 0.827 | 0.83  | 0.834 | 0.839 | 0.843 | 0.846 | 0.849 | 0.854 | 0.857 | 0.86  | 0.865 | 0.868 | 0.87  | 0.872 |       |
| High-income North America | 0.765 | 0.769 | 0.773 | 0.777 | 0.779 | 0.782 | 0.786 | 0.787 | 0.786 | 0.784 | 0.784 | 0.786 | 0.789 | 0.793 | 0.796 | 0.8   | 0.805 | 0.807 | 0.809 | 0.812 | 0.815 | 0.82  | 0.824 | 0.827 | 0.829 | 0.83  | 0.829 | 0.832 | 0.837 | 0.843 | 0.848 | 0.852 | 0.856 | 0.859 | 0.861 | 0.865 | 0.867 | 0.868 |       |
| Canada                    | 0.764 | 0.769 | 0.772 | 0.777 | 0.782 | 0.787 | 0.792 | 0.796 | 0.798 | 0.8   | 0.802 | 0.805 | 0.808 | 0.811 | 0.814 | 0.818 | 0.823 | 0.828 | 0.832 | 0.836 | 0.841 | 0.846 | 0.85  | 0.853 | 0.857 | 0.859 | 0.861 | 0.862 | 0.864 | 0.867 | 0.871 | 0.874 | 0.877 | 0.878 | 0.879 | 0.88  | 0.881 | 0.882 |       |
| Greenland                 | 0.662 | 0.666 | 0.671 | 0.674 | 0.675 | 0.676 | 0.676 | 0.675 | 0.673 | 0.673 | 0.671 | 0.67  | 0.67  | 0.671 | 0.672 | 0.675 | 0.679 | 0.683 | 0.687 | 0.691 | 0.695 | 0.699 | 0.703 | 0.708 | 0.713 | 0.717 | 0.722 | 0.726 | 0.731 | 0.737 | 0.743 | 0.751 | 0.754 | 0.756 | 0.757 | 0.759 | 0.76  |       |       |
| USA                       | 0.765 | 0.769 | 0.772 | 0.777 | 0.779 | 0.781 | 0.785 | 0.786 | 0.784 | 0.782 | 0.781 | 0.784 | 0.787 | 0.79  | 0.793 | 0.798 | 0.804 | 0.806 | 0.809 | 0.812 | 0.815 | 0.817 | 0.821 | 0.823 | 0.826 | 0.826 | 0.826 | 0.826 | 0.829 | 0.834 | 0.84  | 0.846 | 0.85  | 0.853 | 0.857 | 0.859 | 0.863 | 0.866 | 0.867 |
| Alabama                   | 0.723 | 0.729 | 0.733 | 0.739 | 0.742 | 0.745 | 0.749 | 0.75  | 0.748 | 0.745 | 0.745 | 0.749 | 0.753 | 0.757 | 0.76  | 0.765 | 0.769 | 0.771 | 0.773 | 0.777 | 0.783 | 0.787 | 0.791 | 0.794 | 0.796 | 0.799 | 0.801 | 0.809 | 0.816 | 0.82  | 0.824 | 0.827 | 0.83  | 0.834 | 0.837 | 0.838 | 0.839 | 0.841 |       |
| Alaska                    | 0.76  | 0.762 | 0.764 | 0.768 | 0.767 | 0.768 | 0.772 | 0.771 | 0.767 | 0.759 | 0.755 | 0.757 | 0.761 | 0.767 | 0.772 | 0.781 | 0.788 | 0.79  | 0.793 | 0.795 | 0.799 | 0.804 | 0.808 | 0.811 | 0.814 | 0.813 | 0.811 | 0.813 | 0.818 | 0.826 | 0.833 | 0.838 | 0.843 | 0.847 | 0.851 | 0.857 | 0.86  | 0.861 |       |
| Arizona                   | 0.75  | 0.751 | 0.752 | 0.755 | 0.754 | 0.755 | 0.759 | 0.757 | 0.753 | 0.751 | 0.753 | 0.755 | 0.758 | 0.76  | 0.764 | 0.769 | 0.77  | 0.771 | 0.772 | 0.775 | 0.781 | 0.784 | 0.787 | 0.79  | 0.791 | 0.791 | 0.791 | 0.797 | 0.806 | 0.815 | 0.823 | 0.828 | 0.832 | 0.836 | 0.839 | 0.842 | 0.845 | 0.846 |       |
| Arkansas                  | 0.706 | 0.711 | 0.716 | 0.721 | 0.723 | 0.726 | 0.729 | 0.732 | 0.723 | 0.727 | 0.733 | 0.738 | 0.741 | 0.746 | 0.751 | 0.753 | 0.754 | 0.757 | 0.763 | 0.767 | 0.77  | 0.773 | 0.777 | 0.779 | 0.782 | 0.784 | 0.786 | 0.789 | 0.792 | 0.794 | 0.797 | 0.799 | 0.802 | 0.807 | 0.811 | 0.816 | 0.821 | 0.825 | 0.826 |
| California                | 0.779 | 0.781 | 0.782 | 0.786 | 0.786 | 0.788 | 0.788 | 0.786 | 0.782 | 0.775 | 0.771 | 0.771 | 0.773 | 0.776 | 0.78  | 0.787 | 0.794 | 0.798 | 0.803 | 0.807 | 0.812 | 0.819 | 0.823 | 0.826 | 0.829 | 0.83  | 0.831 | 0.835 | 0.84  | 0.846 | 0.852 | 0.856 | 0.859 | 0.863 | 0.865 | 0.869 | 0.871 | 0.872 |       |
| Colorado                  | 0.786 | 0.789 | 0.791 | 0.794 | 0.795 | 0.797 | 0.8   | 0.801 | 0.801 | 0.804 | 0.804 | 0.807 | 0.81  | 0.815 | 0.818 | 0.82  | 0.821 | 0.824 | 0.83  | 0.833 | 0.836 | 0.839 | 0.84  | 0.844 | 0.849 | 0.855 | 0.861 | 0.865 | 0.869 | 0.872 | 0.875 | 0.879 | 0.881 | 0.882 | 0.883 | 0.884 | 0.885 | 0.886 |       |
| Connecticut               | 0.812 | 0.816 | 0.819 | 0.824 | 0.827 | 0.83  | 0.835 | 0.837 | 0.839 | 0.84  | 0.841 | 0.844 | 0.847 | 0.85  | 0.853 | 0.856 | 0.859 | 0.861 | 0.863 | 0.866 | 0.869 | 0.874 | 0.877 | 0.879 | 0.881 | 0.881 | 0.881 | 0.883 | 0.88  |       |       |       |       |       |       |       |       |       |       |



Appendix Table 20. Socio-demographic Index values for all estimated GBD 2017 locations, 1980–2017

| Location               | 1980  | 1981  | 1982  | 1983  | 1984  | 1985  | 1986  | 1987  | 1988  | 1989  | 1990  | 1991  | 1992  | 1993  | 1994  | 1995  | 1996  | 1997  | 1998  | 1999  | 2000  | 2001  | 2002  | 2003  | 2004  | 2005  | 2006  | 2007  | 2008  | 2009  | 2010  | 2011  | 2012  | 2013  | 2014  | 2015  | 2016  | 2017  |       |       |       |       |       |       |       |       |       |       |       |       |       |       |       |       |       |       |       |       |       |       |       |       |       |       |       |       |       |       |       |       |       |       |       |      |       |       |       |       |       |       |       |       |       |      |       |       |       |       |       |       |       |       |       |      |       |       |       |       |       |       |       |       |       |      |       |       |       |       |       |       |       |       |       |     |       |       |       |       |       |       |       |       |       |      |       |       |       |       |       |       |       |       |       |      |       |       |       |       |       |       |       |       |       |      |       |       |       |       |       |       |       |       |       |      |       |       |       |       |       |       |       |       |       |      |       |       |       |       |       |       |       |       |       |      |       |       |       |       |       |       |       |       |       |      |       |       |       |       |       |       |       |       |       |      |       |       |       |       |       |       |       |       |       |      |       |       |       |       |       |       |       |       |       |   |       |       |       |       |       |       |       |       |       |      |       |       |       |       |       |       |       |       |       |      |       |       |       |       |       |       |       |       |       |      |       |       |       |       |       |       |       |       |       |      |       |       |       |       |       |       |       |       |       |      |       |       |       |       |       |       |       |       |       |      |       |       |       |       |       |       |       |       |       |      |       |       |       |       |       |       |       |       |       |      |       |       |       |       |       |       |       |       |       |      |       |       |       |       |       |       |       |       |       |     |       |       |       |       |       |       |       |       |       |      |       |       |       |       |       |       |       |       |       |      |       |       |       |       |       |       |       |       |       |      |       |
|------------------------|-------|-------|-------|-------|-------|-------|-------|-------|-------|-------|-------|-------|-------|-------|-------|-------|-------|-------|-------|-------|-------|-------|-------|-------|-------|-------|-------|-------|-------|-------|-------|-------|-------|-------|-------|-------|-------|-------|-------|-------|-------|-------|-------|-------|-------|-------|-------|-------|-------|-------|-------|-------|-------|-------|-------|-------|-------|-------|-------|-------|-------|-------|-------|-------|-------|-------|-------|-------|-------|-------|-------|-------|-------|------|-------|-------|-------|-------|-------|-------|-------|-------|-------|------|-------|-------|-------|-------|-------|-------|-------|-------|-------|------|-------|-------|-------|-------|-------|-------|-------|-------|-------|------|-------|-------|-------|-------|-------|-------|-------|-------|-------|-----|-------|-------|-------|-------|-------|-------|-------|-------|-------|------|-------|-------|-------|-------|-------|-------|-------|-------|-------|------|-------|-------|-------|-------|-------|-------|-------|-------|-------|------|-------|-------|-------|-------|-------|-------|-------|-------|-------|------|-------|-------|-------|-------|-------|-------|-------|-------|-------|------|-------|-------|-------|-------|-------|-------|-------|-------|-------|------|-------|-------|-------|-------|-------|-------|-------|-------|-------|------|-------|-------|-------|-------|-------|-------|-------|-------|-------|------|-------|-------|-------|-------|-------|-------|-------|-------|-------|------|-------|-------|-------|-------|-------|-------|-------|-------|-------|---|-------|-------|-------|-------|-------|-------|-------|-------|-------|------|-------|-------|-------|-------|-------|-------|-------|-------|-------|------|-------|-------|-------|-------|-------|-------|-------|-------|-------|------|-------|-------|-------|-------|-------|-------|-------|-------|-------|------|-------|-------|-------|-------|-------|-------|-------|-------|-------|------|-------|-------|-------|-------|-------|-------|-------|-------|-------|------|-------|-------|-------|-------|-------|-------|-------|-------|-------|------|-------|-------|-------|-------|-------|-------|-------|-------|-------|------|-------|-------|-------|-------|-------|-------|-------|-------|-------|------|-------|-------|-------|-------|-------|-------|-------|-------|-------|-----|-------|-------|-------|-------|-------|-------|-------|-------|-------|------|-------|-------|-------|-------|-------|-------|-------|-------|-------|------|-------|-------|-------|-------|-------|-------|-------|-------|-------|------|-------|
| Virginia               | 0.777 | 0.781 | 0.785 | 0.789 | 0.791 | 0.794 | 0.798 | 0.8   | 0.8   | 0.799 | 0.8   | 0.803 | 0.807 | 0.81  | 0.814 | 0.818 | 0.822 | 0.823 | 0.824 | 0.826 | 0.829 | 0.834 | 0.838 | 0.841 | 0.845 | 0.846 | 0.847 | 0.851 | 0.856 | 0.862 | 0.867 | 0.871 | 0.874 | 0.877 | 0.88  | 0.883 | 0.885 | 0.885 |       |       |       |       |       |       |       |       |       |       |       |       |       |       |       |       |       |       |       |       |       |       |       |       |       |       |       |       |       |       |       |       |       |       |       |      |       |       |       |       |       |       |       |       |       |      |       |       |       |       |       |       |       |       |       |      |       |       |       |       |       |       |       |       |       |      |       |       |       |       |       |       |       |       |       |     |       |       |       |       |       |       |       |       |       |      |       |       |       |       |       |       |       |       |       |      |       |       |       |       |       |       |       |       |       |      |       |       |       |       |       |       |       |       |       |      |       |       |       |       |       |       |       |       |       |      |       |       |       |       |       |       |       |       |       |      |       |       |       |       |       |       |       |       |       |      |       |       |       |       |       |       |       |       |       |      |       |       |       |       |       |       |       |       |       |      |       |       |       |       |       |       |       |       |       |   |       |       |       |       |       |       |       |       |       |      |       |       |       |       |       |       |       |       |       |      |       |       |       |       |       |       |       |       |       |      |       |       |       |       |       |       |       |       |       |      |       |       |       |       |       |       |       |       |       |      |       |       |       |       |       |       |       |       |       |      |       |       |       |       |       |       |       |       |       |      |       |       |       |       |       |       |       |       |       |      |       |       |       |       |       |       |       |       |       |      |       |       |       |       |       |       |       |       |       |     |       |       |       |       |       |       |       |       |       |      |       |       |       |       |       |       |       |       |       |      |       |       |       |       |       |       |       |       |       |      |       |
| Washington             | 0.785 | 0.788 | 0.79  | 0.794 | 0.795 | 0.797 | 0.8   | 0.801 | 0.8   | 0.797 | 0.797 | 0.8   | 0.804 | 0.807 | 0.811 | 0.816 | 0.821 | 0.823 | 0.827 | 0.83  | 0.834 | 0.84  | 0.844 | 0.846 | 0.849 | 0.848 | 0.848 | 0.85  | 0.855 | 0.86  | 0.865 | 0.868 | 0.871 | 0.874 | 0.877 | 0.881 | 0.883 | 0.884 | 0.884 |       |       |       |       |       |       |       |       |       |       |       |       |       |       |       |       |       |       |       |       |       |       |       |       |       |       |       |       |       |       |       |       |       |       |      |       |       |       |       |       |       |       |       |       |      |       |       |       |       |       |       |       |       |       |      |       |       |       |       |       |       |       |       |       |      |       |       |       |       |       |       |       |       |       |     |       |       |       |       |       |       |       |       |       |      |       |       |       |       |       |       |       |       |       |      |       |       |       |       |       |       |       |       |       |      |       |       |       |       |       |       |       |       |       |      |       |       |       |       |       |       |       |       |       |      |       |       |       |       |       |       |       |       |       |      |       |       |       |       |       |       |       |       |       |      |       |       |       |       |       |       |       |       |       |      |       |       |       |       |       |       |       |       |       |      |       |       |       |       |       |       |       |       |       |   |       |       |       |       |       |       |       |       |       |      |       |       |       |       |       |       |       |       |       |      |       |       |       |       |       |       |       |       |       |      |       |       |       |       |       |       |       |       |       |      |       |       |       |       |       |       |       |       |       |      |       |       |       |       |       |       |       |       |       |      |       |       |       |       |       |       |       |       |       |      |       |       |       |       |       |       |       |       |       |      |       |       |       |       |       |       |       |       |       |      |       |       |       |       |       |       |       |       |       |     |       |       |       |       |       |       |       |       |       |      |       |       |       |       |       |       |       |       |       |      |       |       |       |       |       |       |       |       |       |      |       |
| West Virginia          | 0.724 | 0.73  | 0.736 | 0.742 | 0.744 | 0.747 | 0.751 | 0.752 | 0.751 | 0.748 | 0.749 | 0.752 | 0.756 | 0.761 | 0.764 | 0.769 | 0.773 | 0.774 | 0.775 | 0.776 | 0.778 | 0.783 | 0.786 | 0.787 | 0.789 | 0.787 | 0.784 | 0.784 | 0.787 | 0.793 | 0.799 | 0.802 | 0.806 | 0.81  | 0.814 | 0.82  | 0.824 | 0.825 | 0.825 |       |       |       |       |       |       |       |       |       |       |       |       |       |       |       |       |       |       |       |       |       |       |       |       |       |       |       |       |       |       |       |       |       |       |      |       |       |       |       |       |       |       |       |       |      |       |       |       |       |       |       |       |       |       |      |       |       |       |       |       |       |       |       |       |      |       |       |       |       |       |       |       |       |       |     |       |       |       |       |       |       |       |       |       |      |       |       |       |       |       |       |       |       |       |      |       |       |       |       |       |       |       |       |       |      |       |       |       |       |       |       |       |       |       |      |       |       |       |       |       |       |       |       |       |      |       |       |       |       |       |       |       |       |       |      |       |       |       |       |       |       |       |       |       |      |       |       |       |       |       |       |       |       |       |      |       |       |       |       |       |       |       |       |       |      |       |       |       |       |       |       |       |       |       |   |       |       |       |       |       |       |       |       |       |      |       |       |       |       |       |       |       |       |       |      |       |       |       |       |       |       |       |       |       |      |       |       |       |       |       |       |       |       |       |      |       |       |       |       |       |       |       |       |       |      |       |       |       |       |       |       |       |       |       |      |       |       |       |       |       |       |       |       |       |      |       |       |       |       |       |       |       |       |       |      |       |       |       |       |       |       |       |       |       |      |       |       |       |       |       |       |       |       |       |     |       |       |       |       |       |       |       |       |       |      |       |       |       |       |       |       |       |       |       |      |       |       |       |       |       |       |       |       |       |      |       |
| Wisconsin              | 0.773 | 0.777 | 0.781 | 0.785 | 0.788 | 0.791 | 0.796 | 0.799 | 0.8   | 0.8   | 0.801 | 0.804 | 0.808 | 0.812 | 0.815 | 0.819 | 0.823 | 0.826 | 0.828 | 0.831 | 0.835 | 0.839 | 0.841 | 0.843 | 0.843 | 0.843 | 0.845 | 0.849 | 0.853 | 0.858 | 0.862 | 0.865 | 0.868 | 0.871 | 0.874 | 0.877 | 0.881 | 0.883 | 0.884 | 0.884 |       |       |       |       |       |       |       |       |       |       |       |       |       |       |       |       |       |       |       |       |       |       |       |       |       |       |       |       |       |       |       |       |       |      |       |       |       |       |       |       |       |       |       |      |       |       |       |       |       |       |       |       |       |      |       |       |       |       |       |       |       |       |       |      |       |       |       |       |       |       |       |       |       |     |       |       |       |       |       |       |       |       |       |      |       |       |       |       |       |       |       |       |       |      |       |       |       |       |       |       |       |       |       |      |       |       |       |       |       |       |       |       |       |      |       |       |       |       |       |       |       |       |       |      |       |       |       |       |       |       |       |       |       |      |       |       |       |       |       |       |       |       |       |      |       |       |       |       |       |       |       |       |       |      |       |       |       |       |       |       |       |       |       |      |       |       |       |       |       |       |       |       |       |   |       |       |       |       |       |       |       |       |       |      |       |       |       |       |       |       |       |       |       |      |       |       |       |       |       |       |       |       |       |      |       |       |       |       |       |       |       |       |       |      |       |       |       |       |       |       |       |       |       |      |       |       |       |       |       |       |       |       |       |      |       |       |       |       |       |       |       |       |       |      |       |       |       |       |       |       |       |       |       |      |       |       |       |       |       |       |       |       |       |      |       |       |       |       |       |       |       |       |       |     |       |       |       |       |       |       |       |       |       |      |       |       |       |       |       |       |       |       |       |      |       |       |       |       |       |       |       |       |       |      |       |
| Wyoming                | 0.742 | 0.746 | 0.75  | 0.755 | 0.755 | 0.758 | 0.765 | 0.767 | 0.765 | 0.766 | 0.771 | 0.777 | 0.782 | 0.786 | 0.792 | 0.796 | 0.799 | 0.801 | 0.804 | 0.809 | 0.813 | 0.816 | 0.818 | 0.819 | 0.819 | 0.819 | 0.823 | 0.831 | 0.838 | 0.846 | 0.851 | 0.855 | 0.858 | 0.862 | 0.866 | 0.869 | 0.869 | 0.869 | 0.869 | 0.869 |       |       |       |       |       |       |       |       |       |       |       |       |       |       |       |       |       |       |       |       |       |       |       |       |       |       |       |       |       |       |       |       |       |      |       |       |       |       |       |       |       |       |       |      |       |       |       |       |       |       |       |       |       |      |       |       |       |       |       |       |       |       |       |      |       |       |       |       |       |       |       |       |       |     |       |       |       |       |       |       |       |       |       |      |       |       |       |       |       |       |       |       |       |      |       |       |       |       |       |       |       |       |       |      |       |       |       |       |       |       |       |       |       |      |       |       |       |       |       |       |       |       |       |      |       |       |       |       |       |       |       |       |       |      |       |       |       |       |       |       |       |       |       |      |       |       |       |       |       |       |       |       |       |      |       |       |       |       |       |       |       |       |       |      |       |       |       |       |       |       |       |       |       |   |       |       |       |       |       |       |       |       |       |      |       |       |       |       |       |       |       |       |       |      |       |       |       |       |       |       |       |       |       |      |       |       |       |       |       |       |       |       |       |      |       |       |       |       |       |       |       |       |       |      |       |       |       |       |       |       |       |       |       |      |       |       |       |       |       |       |       |       |       |      |       |       |       |       |       |       |       |       |       |      |       |       |       |       |       |       |       |       |       |      |       |       |       |       |       |       |       |       |       |     |       |       |       |       |       |       |       |       |       |      |       |       |       |       |       |       |       |       |       |      |       |       |       |       |       |       |       |       |       |      |       |
| Southern Latin America | 0.544 | 0.56  | 0.566 | 0.572 | 0.576 | 0.577 | 0.579 | 0.583 | 0.586 | 0.591 | 0.594 | 0.6   | 0.607 | 0.613 | 0.619 | 0.626 | 0.632 | 0.638 | 0.643 | 0.648 | 0.652 | 0.658 | 0.665 | 0.668 | 0.672 | 0.677 | 0.679 | 0.682 | 0.685 | 0.69  | 0.695 | 0.7   | 0.704 | 0.707 | 0.713 | 0.717 | 0.721 | 0.725 | 0.729 | 0.733 | 0.737 |       |       |       |       |       |       |       |       |       |       |       |       |       |       |       |       |       |       |       |       |       |       |       |       |       |       |       |       |       |       |       |       |      |       |       |       |       |       |       |       |       |       |      |       |       |       |       |       |       |       |       |       |      |       |       |       |       |       |       |       |       |       |      |       |       |       |       |       |       |       |       |       |     |       |       |       |       |       |       |       |       |       |      |       |       |       |       |       |       |       |       |       |      |       |       |       |       |       |       |       |       |       |      |       |       |       |       |       |       |       |       |       |      |       |       |       |       |       |       |       |       |       |      |       |       |       |       |       |       |       |       |       |      |       |       |       |       |       |       |       |       |       |      |       |       |       |       |       |       |       |       |       |      |       |       |       |       |       |       |       |       |       |      |       |       |       |       |       |       |       |       |       |   |       |       |       |       |       |       |       |       |       |      |       |       |       |       |       |       |       |       |       |      |       |       |       |       |       |       |       |       |       |      |       |       |       |       |       |       |       |       |       |      |       |       |       |       |       |       |       |       |       |      |       |       |       |       |       |       |       |       |       |      |       |       |       |       |       |       |       |       |       |      |       |       |       |       |       |       |       |       |       |      |       |       |       |       |       |       |       |       |       |      |       |       |       |       |       |       |       |       |       |     |       |       |       |       |       |       |       |       |       |      |       |       |       |       |       |       |       |       |       |      |       |       |       |       |       |       |       |       |       |      |       |
| Argentina              | 0.55  | 0.557 | 0.563 | 0.569 | 0.572 | 0.572 | 0.575 | 0.579 | 0.584 | 0.589 | 0.59  | 0.595 | 0.604 | 0.61  | 0.617 | 0.624 | 0.63  | 0.635 | 0.64  | 0.644 | 0.647 | 0.649 | 0.65  | 0.653 | 0.658 | 0.665 | 0.669 | 0.672 | 0.675 | 0.677 | 0.681 | 0.686 | 0.691 | 0.693 | 0.696 | 0.702 | 0.707 | 0.71  | 0.714 | 0.718 | 0.722 |       |       |       |       |       |       |       |       |       |       |       |       |       |       |       |       |       |       |       |       |       |       |       |       |       |       |       |       |       |       |       |       |      |       |       |       |       |       |       |       |       |       |      |       |       |       |       |       |       |       |       |       |      |       |       |       |       |       |       |       |       |       |      |       |       |       |       |       |       |       |       |       |     |       |       |       |       |       |       |       |       |       |      |       |       |       |       |       |       |       |       |       |      |       |       |       |       |       |       |       |       |       |      |       |       |       |       |       |       |       |       |       |      |       |       |       |       |       |       |       |       |       |      |       |       |       |       |       |       |       |       |       |      |       |       |       |       |       |       |       |       |       |      |       |       |       |       |       |       |       |       |       |      |       |       |       |       |       |       |       |       |       |      |       |       |       |       |       |       |       |       |       |   |       |       |       |       |       |       |       |       |       |      |       |       |       |       |       |       |       |       |       |      |       |       |       |       |       |       |       |       |       |      |       |       |       |       |       |       |       |       |       |      |       |       |       |       |       |       |       |       |       |      |       |       |       |       |       |       |       |       |       |      |       |       |       |       |       |       |       |       |       |      |       |       |       |       |       |       |       |       |       |      |       |       |       |       |       |       |       |       |       |      |       |       |       |       |       |       |       |       |       |     |       |       |       |       |       |       |       |       |       |      |       |       |       |       |       |       |       |       |       |      |       |       |       |       |       |       |       |       |       |      |       |
| Chile                  | 0.558 | 0.562 | 0.569 | 0.575 | 0.579 | 0.583 | 0.586 | 0.587 | 0.589 | 0.593 | 0.6   | 0.608 | 0.615 | 0.62  | 0.626 | 0.633 | 0.64  | 0.647 | 0.654 | 0.661 | 0.667 | 0.674 | 0.681 | 0.687 | 0.692 | 0.696 | 0.698 | 0.701 | 0.704 | 0.708 | 0.714 | 0.721 | 0.727 | 0.732 | 0.736 | 0.742 | 0.746 | 0.748 | 0.751 | 0.754 | 0.757 |       |       |       |       |       |       |       |       |       |       |       |       |       |       |       |       |       |       |       |       |       |       |       |       |       |       |       |       |       |       |       |       |      |       |       |       |       |       |       |       |       |       |      |       |       |       |       |       |       |       |       |       |      |       |       |       |       |       |       |       |       |       |      |       |       |       |       |       |       |       |       |       |     |       |       |       |       |       |       |       |       |       |      |       |       |       |       |       |       |       |       |       |      |       |       |       |       |       |       |       |       |       |      |       |       |       |       |       |       |       |       |       |      |       |       |       |       |       |       |       |       |       |      |       |       |       |       |       |       |       |       |       |      |       |       |       |       |       |       |       |       |       |      |       |       |       |       |       |       |       |       |       |      |       |       |       |       |       |       |       |       |       |      |       |       |       |       |       |       |       |       |       |   |       |       |       |       |       |       |       |       |       |      |       |       |       |       |       |       |       |       |       |      |       |       |       |       |       |       |       |       |       |      |       |       |       |       |       |       |       |       |       |      |       |       |       |       |       |       |       |       |       |      |       |       |       |       |       |       |       |       |       |      |       |       |       |       |       |       |       |       |       |      |       |       |       |       |       |       |       |       |       |      |       |       |       |       |       |       |       |       |       |      |       |       |       |       |       |       |       |       |       |     |       |       |       |       |       |       |       |       |       |      |       |       |       |       |       |       |       |       |       |      |       |       |       |       |       |       |       |       |       |      |       |
| Uruguay                | 0.557 | 0.562 | 0.567 | 0.572 | 0.577 | 0.579 | 0.581 | 0.582 | 0.583 | 0.587 | 0.592 | 0.597 | 0.6   | 0.602 | 0.606 | 0.609 | 0.613 | 0.618 | 0.625 | 0.632 | 0.637 | 0.64  | 0.643 | 0.647 | 0.652 | 0.656 | 0.659 | 0.661 | 0.663 | 0.666 | 0.671 | 0.675 | 0.68  | 0.685 | 0.691 | 0.697 | 0.702 | 0.707 | 0.711 | 0.715 | 0.719 | 0.723 |       |       |       |       |       |       |       |       |       |       |       |       |       |       |       |       |       |       |       |       |       |       |       |       |       |       |       |       |       |       |       |      |       |       |       |       |       |       |       |       |       |      |       |       |       |       |       |       |       |       |       |      |       |       |       |       |       |       |       |       |       |      |       |       |       |       |       |       |       |       |       |     |       |       |       |       |       |       |       |       |       |      |       |       |       |       |       |       |       |       |       |      |       |       |       |       |       |       |       |       |       |      |       |       |       |       |       |       |       |       |       |      |       |       |       |       |       |       |       |       |       |      |       |       |       |       |       |       |       |       |       |      |       |       |       |       |       |       |       |       |       |      |       |       |       |       |       |       |       |       |       |      |       |       |       |       |       |       |       |       |       |      |       |       |       |       |       |       |       |       |       |   |       |       |       |       |       |       |       |       |       |      |       |       |       |       |       |       |       |       |       |      |       |       |       |       |       |       |       |       |       |      |       |       |       |       |       |       |       |       |       |      |       |       |       |       |       |       |       |       |       |      |       |       |       |       |       |       |       |       |       |      |       |       |       |       |       |       |       |       |       |      |       |       |       |       |       |       |       |       |       |      |       |       |       |       |       |       |       |       |       |      |       |       |       |       |       |       |       |       |       |     |       |       |       |       |       |       |       |       |       |      |       |       |       |       |       |       |       |       |       |      |       |       |       |       |       |       |       |       |       |      |       |
| Western Europe         | 0.707 | 0.714 | 0.72  | 0.727 | 0.732 | 0.737 | 0.743 | 0.748 | 0.753 | 0.758 | 0.764 | 0.77  | 0.776 | 0.782 | 0.787 | 0.791 | 0.795 | 0.798 | 0.801 | 0.805 | 0.809 | 0.813 | 0.817 | 0.82  | 0.822 | 0.825 | 0.828 | 0.83  | 0.833 | 0.836 | 0.838 | 0.842 | 0.845 | 0.848 | 0.851 | 0.853 | 0.855 | 0.857 | 0.859 | 0.861 | 0.863 | 0.865 | 0.867 |       |       |       |       |       |       |       |       |       |       |       |       |       |       |       |       |       |       |       |       |       |       |       |       |       |       |       |       |       |       |      |       |       |       |       |       |       |       |       |       |      |       |       |       |       |       |       |       |       |       |      |       |       |       |       |       |       |       |       |       |      |       |       |       |       |       |       |       |       |       |     |       |       |       |       |       |       |       |       |       |      |       |       |       |       |       |       |       |       |       |      |       |       |       |       |       |       |       |       |       |      |       |       |       |       |       |       |       |       |       |      |       |       |       |       |       |       |       |       |       |      |       |       |       |       |       |       |       |       |       |      |       |       |       |       |       |       |       |       |       |      |       |       |       |       |       |       |       |       |       |      |       |       |       |       |       |       |       |       |       |      |       |       |       |       |       |       |       |       |       |   |       |       |       |       |       |       |       |       |       |      |       |       |       |       |       |       |       |       |       |      |       |       |       |       |       |       |       |       |       |      |       |       |       |       |       |       |       |       |       |      |       |       |       |       |       |       |       |       |       |      |       |       |       |       |       |       |       |       |       |      |       |       |       |       |       |       |       |       |       |      |       |       |       |       |       |       |       |       |       |      |       |       |       |       |       |       |       |       |       |      |       |       |       |       |       |       |       |       |       |     |       |       |       |       |       |       |       |       |       |      |       |       |       |       |       |       |       |       |       |      |       |       |       |       |       |       |       |       |       |      |       |
| Andorra                | 0.826 | 0.829 | 0.832 | 0.835 | 0.838 | 0.841 | 0.843 | 0.844 | 0.846 | 0.847 | 0.85  | 0.854 | 0.856 | 0.858 | 0.859 | 0.86  | 0.863 | 0.866 | 0.868 | 0.871 | 0.873 | 0.875 | 0.878 | 0.881 | 0.883 | 0.885 | 0.886 | 0.888 | 0.89  | 0.891 | 0.894 | 0.896 | 0.897 | 0.899 | 0.9   | 0.901 | 0.902 | 0.903 | 0.904 | 0.905 | 0.906 | 0.907 | 0.908 | 0.909 | 0.91  |       |       |       |       |       |       |       |       |       |       |       |       |       |       |       |       |       |       |       |       |       |       |       |       |       |       |       |       |      |       |       |       |       |       |       |       |       |       |      |       |       |       |       |       |       |       |       |       |      |       |       |       |       |       |       |       |       |       |      |       |       |       |       |       |       |       |       |       |     |       |       |       |       |       |       |       |       |       |      |       |       |       |       |       |       |       |       |       |      |       |       |       |       |       |       |       |       |       |      |       |       |       |       |       |       |       |       |       |      |       |       |       |       |       |       |       |       |       |      |       |       |       |       |       |       |       |       |       |      |       |       |       |       |       |       |       |       |       |      |       |       |       |       |       |       |       |       |       |      |       |       |       |       |       |       |       |       |       |      |       |       |       |       |       |       |       |       |       |   |       |       |       |       |       |       |       |       |       |      |       |       |       |       |       |       |       |       |       |      |       |       |       |       |       |       |       |       |       |      |       |       |       |       |       |       |       |       |       |      |       |       |       |       |       |       |       |       |       |      |       |       |       |       |       |       |       |       |       |      |       |       |       |       |       |       |       |       |       |      |       |       |       |       |       |       |       |       |       |      |       |       |       |       |       |       |       |       |       |      |       |       |       |       |       |       |       |       |       |     |       |       |       |       |       |       |       |       |       |      |       |       |       |       |       |       |       |       |       |      |       |       |       |       |       |       |       |       |       |      |       |
| Austria                | 0.733 | 0.736 | 0.741 | 0.748 | 0.754 | 0.759 | 0.763 | 0.767 | 0.771 | 0.774 | 0.776 | 0.778 | 0.78  | 0.785 | 0.79  | 0.795 | 0.8   | 0.805 | 0.809 | 0.813 | 0.818 | 0.822 | 0.825 | 0.828 | 0.831 | 0.834 | 0.838 | 0.841 | 0.845 | 0.847 | 0.85  | 0.854 | 0.857 | 0.859 | 0.862 | 0.863 | 0.865 | 0.866 | 0.867 | 0.868 | 0.869 | 0.87  | 0.871 | 0.872 | 0.873 |       |       |       |       |       |       |       |       |       |       |       |       |       |       |       |       |       |       |       |       |       |       |       |       |       |       |       |       |      |       |       |       |       |       |       |       |       |       |      |       |       |       |       |       |       |       |       |       |      |       |       |       |       |       |       |       |       |       |      |       |       |       |       |       |       |       |       |       |     |       |       |       |       |       |       |       |       |       |      |       |       |       |       |       |       |       |       |       |      |       |       |       |       |       |       |       |       |       |      |       |       |       |       |       |       |       |       |       |      |       |       |       |       |       |       |       |       |       |      |       |       |       |       |       |       |       |       |       |      |       |       |       |       |       |       |       |       |       |      |       |       |       |       |       |       |       |       |       |      |       |       |       |       |       |       |       |       |       |      |       |       |       |       |       |       |       |       |       |   |       |       |       |       |       |       |       |       |       |      |       |       |       |       |       |       |       |       |       |      |       |       |       |       |       |       |       |       |       |      |       |       |       |       |       |       |       |       |       |      |       |       |       |       |       |       |       |       |       |      |       |       |       |       |       |       |       |       |       |      |       |       |       |       |       |       |       |       |       |      |       |       |       |       |       |       |       |       |       |      |       |       |       |       |       |       |       |       |       |      |       |       |       |       |       |       |       |       |       |     |       |       |       |       |       |       |       |       |       |      |       |       |       |       |       |       |       |       |       |      |       |       |       |       |       |       |       |       |       |      |       |
| Belgium                | 0.755 | 0.761 | 0.767 | 0.773 | 0.779 | 0.784 | 0.789 | 0.792 | 0.796 | 0.8   | 0.803 | 0.808 | 0.813 | 0.818 | 0.822 | 0.826 | 0.829 | 0.832 | 0.835 | 0.837 | 0.84  | 0.843 | 0.847 | 0.849 | 0.852 | 0.854 | 0.856 | 0.858 | 0.861 | 0.863 | 0.867 | 0.871 | 0.875 | 0.879 | 0.882 | 0.884 | 0.885 | 0.886 | 0.887 | 0.888 | 0.889 | 0.89  | 0.891 | 0.892 | 0.893 |       |       |       |       |       |       |       |       |       |       |       |       |       |       |       |       |       |       |       |       |       |       |       |       |       |       |       |       |      |       |       |       |       |       |       |       |       |       |      |       |       |       |       |       |       |       |       |       |      |       |       |       |       |       |       |       |       |       |      |       |       |       |       |       |       |       |       |       |     |       |       |       |       |       |       |       |       |       |      |       |       |       |       |       |       |       |       |       |      |       |       |       |       |       |       |       |       |       |      |       |       |       |       |       |       |       |       |       |      |       |       |       |       |       |       |       |       |       |      |       |       |       |       |       |       |       |       |       |      |       |       |       |       |       |       |       |       |       |      |       |       |       |       |       |       |       |       |       |      |       |       |       |       |       |       |       |       |       |      |       |       |       |       |       |       |       |       |       |   |       |       |       |       |       |       |       |       |       |      |       |       |       |       |       |       |       |       |       |      |       |       |       |       |       |       |       |       |       |      |       |       |       |       |       |       |       |       |       |      |       |       |       |       |       |       |       |       |       |      |       |       |       |       |       |       |       |       |       |      |       |       |       |       |       |       |       |       |       |      |       |       |       |       |       |       |       |       |       |      |       |       |       |       |       |       |       |       |       |      |       |       |       |       |       |       |       |       |       |     |       |       |       |       |       |       |       |       |       |      |       |       |       |       |       |       |       |       |       |      |       |       |       |       |       |       |       |       |       |      |       |
| Cyprus                 | 0.652 | 0.658 | 0.664 | 0.67  | 0.677 | 0.685 | 0.694 | 0.702 | 0.71  | 0.718 | 0.724 | 0.73  | 0.74  | 0.75  | 0.758 | 0.765 | 0.771 | 0.778 | 0.784 | 0.789 | 0.795 | 0.803 | 0.81  | 0.817 | 0.824 | 0.83  | 0.837 | 0.842 | 0.847 | 0.851 | 0.854 | 0.857 | 0.859 | 0.861 | 0.862 | 0.863 | 0.864 | 0.865 | 0.866 | 0.867 | 0.868 | 0.869 | 0.87  | 0.871 | 0.872 | 0.873 |       |       |       |       |       |       |       |       |       |       |       |       |       |       |       |       |       |       |       |       |       |       |       |       |       |       |       |      |       |       |       |       |       |       |       |       |       |      |       |       |       |       |       |       |       |       |       |      |       |       |       |       |       |       |       |       |       |      |       |       |       |       |       |       |       |       |       |     |       |       |       |       |       |       |       |       |       |      |       |       |       |       |       |       |       |       |       |      |       |       |       |       |       |       |       |       |       |      |       |       |       |       |       |       |       |       |       |      |       |       |       |       |       |       |       |       |       |      |       |       |       |       |       |       |       |       |       |      |       |       |       |       |       |       |       |       |       |      |       |       |       |       |       |       |       |       |       |      |       |       |       |       |       |       |       |       |       |      |       |       |       |       |       |       |       |       |       |   |       |       |       |       |       |       |       |       |       |      |       |       |       |       |       |       |       |       |       |      |       |       |       |       |       |       |       |       |       |      |       |       |       |       |       |       |       |       |       |      |       |       |       |       |       |       |       |       |       |      |       |       |       |       |       |       |       |       |       |      |       |       |       |       |       |       |       |       |       |      |       |       |       |       |       |       |       |       |       |      |       |       |       |       |       |       |       |       |       |      |       |       |       |       |       |       |       |       |       |     |       |       |       |       |       |       |       |       |       |      |       |       |       |       |       |       |       |       |       |      |       |       |       |       |       |       |       |       |       |      |       |
| Denmark                | 0.809 | 0.815 | 0.821 | 0.825 | 0.828 | 0.832 | 0.836 | 0.839 | 0.841 | 0.843 | 0.846 | 0.849 | 0.852 | 0.855 | 0.858 | 0.862 | 0.866 | 0.87  | 0.874 | 0.877 | 0.881 | 0.884 | 0.888 | 0.891 | 0.893 | 0.895 | 0.897 | 0.899 | 0.9   | 0.902 | 0.904 | 0.907 | 0.91  | 0.912 | 0.914 | 0.915 | 0.916 | 0.918 | 0.919 | 0.92  | 0.921 | 0.922 | 0.923 | 0.924 | 0.925 | 0.926 | 0.927 |       |       |       |       |       |       |       |       |       |       |       |       |       |       |       |       |       |       |       |       |       |       |       |       |       |       |      |       |       |       |       |       |       |       |       |       |      |       |       |       |       |       |       |       |       |       |      |       |       |       |       |       |       |       |       |       |      |       |       |       |       |       |       |       |       |       |     |       |       |       |       |       |       |       |       |       |      |       |       |       |       |       |       |       |       |       |      |       |       |       |       |       |       |       |       |       |      |       |       |       |       |       |       |       |       |       |      |       |       |       |       |       |       |       |       |       |      |       |       |       |       |       |       |       |       |       |      |       |       |       |       |       |       |       |       |       |      |       |       |       |       |       |       |       |       |       |      |       |       |       |       |       |       |       |       |       |      |       |       |       |       |       |       |       |       |       |   |       |       |       |       |       |       |       |       |       |      |       |       |       |       |       |       |       |       |       |      |       |       |       |       |       |       |       |       |       |      |       |       |       |       |       |       |       |       |       |      |       |       |       |       |       |       |       |       |       |      |       |       |       |       |       |       |       |       |       |      |       |       |       |       |       |       |       |       |       |      |       |       |       |       |       |       |       |       |       |      |       |       |       |       |       |       |       |       |       |      |       |       |       |       |       |       |       |       |       |     |       |       |       |       |       |       |       |       |       |      |       |       |       |       |       |       |       |       |       |      |       |       |       |       |       |       |       |       |       |      |       |
| Finland                | 0.769 | 0.772 | 0.776 | 0.782 | 0.789 | 0.795 | 0.799 | 0.803 | 0.807 | 0.811 | 0.813 | 0.813 | 0.814 | 0.815 | 0.817 | 0.821 | 0.825 | 0.828 | 0.831 | 0.835 | 0.84  | 0.844 | 0.847 | 0.851 | 0.854 | 0.857 | 0.859 | 0.862 | 0.865 | 0.869 | 0.871 | 0.875 | 0.878 | 0.881 | 0.884 | 0.887 | 0.889 | 0.891 | 0.893 | 0.895 | 0.897 | 0.899 | 0.901 | 0.903 | 0.905 | 0.907 | 0.909 | 0.911 | 0.913 | 0.915 | 0.917 | 0.919 | 0.921 | 0.923 | 0.925 | 0.927 |       |       |       |       |       |       |       |       |       |       |       |       |       |       |       |       |       |      |       |       |       |       |       |       |       |       |       |      |       |       |       |       |       |       |       |       |       |      |       |       |       |       |       |       |       |       |       |      |       |       |       |       |       |       |       |       |       |     |       |       |       |       |       |       |       |       |       |      |       |       |       |       |       |       |       |       |       |      |       |       |       |       |       |       |       |       |       |      |       |       |       |       |       |       |       |       |       |      |       |       |       |       |       |       |       |       |       |      |       |       |       |       |       |       |       |       |       |      |       |       |       |       |       |       |       |       |       |      |       |       |       |       |       |       |       |       |       |      |       |       |       |       |       |       |       |       |       |      |       |       |       |       |       |       |       |       |       |   |       |       |       |       |       |       |       |       |       |      |       |       |       |       |       |       |       |       |       |      |       |       |       |       |       |       |       |       |       |      |       |       |       |       |       |       |       |       |       |      |       |       |       |       |       |       |       |       |       |      |       |       |       |       |       |       |       |       |       |      |       |       |       |       |       |       |       |       |       |      |       |       |       |       |       |       |       |       |       |      |       |       |       |       |       |       |       |       |       |      |       |       |       |       |       |       |       |       |       |     |       |       |       |       |       |       |       |       |       |      |       |       |       |       |       |       |       |       |       |      |       |       |       |       |       |       |       |       |       |      |       |
| France                 | 0.698 | 0.705 | 0.713 | 0.721 | 0.728 | 0.735 | 0.742 | 0.75  | 0.756 | 0.763 | 0.769 | 0.776 | 0.783 | 0.79  | 0.793 | 0.795 | 0.802 | 0.806 | 0.808 | 0.813 | 0.816 | 0.819 | 0.824 | 0.827 | 0.83  | 0.833 | 0.836 | 0.838 | 0.84  | 0.842 | 0.845 | 0.848 | 0.851 | 0.854 | 0.857 | 0.86  | 0.863 | 0.865 | 0.867 | 0.869 | 0.871 | 0.873 | 0.875 | 0.877 | 0.879 | 0.881 | 0.883 | 0.885 | 0.887 | 0.889 | 0.891 | 0.893 | 0.895 | 0.897 | 0.899 | 0.901 | 0.903 | 0.905 | 0.907 | 0.909 | 0.911 | 0.913 | 0.915 | 0.917 | 0.919 | 0.921 | 0.923 | 0.925 | 0.927 |       |       |       |       |      |       |       |       |       |       |       |       |       |       |      |       |       |       |       |       |       |       |       |       |      |       |       |       |       |       |       |       |       |       |      |       |       |       |       |       |       |       |       |       |     |       |       |       |       |       |       |       |       |       |      |       |       |       |       |       |       |       |       |       |      |       |       |       |       |       |       |       |       |       |      |       |       |       |       |       |       |       |       |       |      |       |       |       |       |       |       |       |       |       |      |       |       |       |       |       |       |       |       |       |      |       |       |       |       |       |       |       |       |       |      |       |       |       |       |       |       |       |       |       |      |       |       |       |       |       |       |       |       |       |      |       |       |       |       |       |       |       |       |       |   |       |       |       |       |       |       |       |       |       |      |       |       |       |       |       |       |       |       |       |      |       |       |       |       |       |       |       |       |       |      |       |       |       |       |       |       |       |       |       |      |       |       |       |       |       |       |       |       |       |      |       |       |       |       |       |       |       |       |       |      |       |       |       |       |       |       |       |       |       |      |       |       |       |       |       |       |       |       |       |      |       |       |       |       |       |       |       |       |       |      |       |       |       |       |       |       |       |       |       |     |       |       |       |       |       |       |       |       |       |      |       |       |       |       |       |       |       |       |       |      |       |       |       |       |       |       |       |       |       |      |       |
| Germany                | 0.747 | 0.752 | 0.757 | 0.763 | 0.768 | 0.776 | 0.781 | 0.787 | 0.796 | 0.801 | 0.805 | 0.809 | 0.811 | 0.812 | 0.813 | 0.814 | 0.818 | 0.823 | 0.827 | 0.832 | 0.835 | 0.838 | 0.84  | 0.843 | 0.847 | 0.849 | 0.852 | 0.854 | 0.856 | 0.858 | 0.861 | 0.863 | 0.867 | 0.871 | 0.875 | 0.879 | 0.882 | 0.884 | 0.885 | 0.886 | 0.887 | 0.888 | 0.889 | 0.89  | 0.891 | 0.892 | 0.893 | 0.894 | 0.895 | 0.896 | 0.897 | 0.898 | 0.899 | 0.9   | 0.901 | 0.902 | 0.903 | 0.904 | 0.905 | 0.906 | 0.907 | 0.908 | 0.909 | 0.91  | 0.911 | 0.912 | 0.913 | 0.914 | 0.915 | 0.916 | 0.917 | 0.918 | 0.919 | 0.92 | 0.921 | 0.922 | 0.923 | 0.924 | 0.925 | 0.926 | 0.927 |       |       |      |       |       |       |       |       |       |       |       |       |      |       |       |       |       |       |       |       |       |       |      |       |       |       |       |       |       |       |       |       |     |       |       |       |       |       |       |       |       |       |      |       |       |       |       |       |       |       |       |       |      |       |       |       |       |       |       |       |       |       |      |       |       |       |       |       |       |       |       |       |      |       |       |       |       |       |       |       |       |       |      |       |       |       |       |       |       |       |       |       |      |       |       |       |       |       |       |       |       |       |      |       |       |       |       |       |       |       |       |       |      |       |       |       |       |       |       |       |       |       |      |       |       |       |       |       |       |       |       |       |   |       |       |       |       |       |       |       |       |       |      |       |       |       |       |       |       |       |       |       |      |       |       |       |       |       |       |       |       |       |      |       |       |       |       |       |       |       |       |       |      |       |       |       |       |       |       |       |       |       |      |       |       |       |       |       |       |       |       |       |      |       |       |       |       |       |       |       |       |       |      |       |       |       |       |       |       |       |       |       |      |       |       |       |       |       |       |       |       |       |      |       |       |       |       |       |       |       |       |       |     |       |       |       |       |       |       |       |       |       |      |       |       |       |       |       |       |       |       |       |      |       |       |       |       |       |       |       |       |       |      |       |
| Greece                 | 0.634 | 0.643 | 0.651 | 0.66  | 0.67  | 0.68  | 0.689 | 0.696 | 0.703 | 0.711 | 0.717 | 0.723 | 0.731 | 0.738 | 0.744 | 0.75  | 0.755 | 0.761 | 0.767 | 0.773 | 0.778 | 0.782 | 0.787 | 0.792 | 0.796 | 0.8   | 0.803 | 0.806 | 0.809 | 0.812 | 0.815 | 0.818 | 0.819 | 0.82  | 0.821 | 0.822 | 0.823 | 0.824 | 0.825 | 0.826 | 0.827 | 0.828 | 0.829 | 0.83  | 0.831 | 0.832 | 0.833 | 0.834 | 0.835 | 0.836 | 0.837 | 0.838 | 0.839 | 0.84  | 0.841 | 0.842 | 0.843 | 0.844 | 0.845 | 0.846 | 0.847 | 0.848 | 0.849 | 0.85  | 0.851 | 0.852 | 0.853 | 0.854 | 0.855 | 0.856 | 0.857 | 0.858 | 0.859 | 0.86 | 0.861 | 0.862 | 0.863 | 0.864 | 0.865 | 0.866 | 0.867 | 0.868 | 0.869 | 0.87 | 0.871 | 0.872 | 0.873 | 0.874 | 0.875 | 0.876 | 0.877 | 0.878 | 0.879 | 0.88 | 0.881 | 0.882 | 0.883 | 0.884 | 0.885 | 0.886 | 0.887 | 0.888 | 0.889 | 0.89 | 0.891 | 0.892 | 0.893 | 0.894 | 0.895 | 0.896 | 0.897 | 0.898 | 0.899 | 0.9 | 0.901 | 0.902 | 0.903 | 0.904 | 0.905 | 0.906 | 0.907 | 0.908 | 0.909 | 0.91 | 0.911 | 0.912 | 0.913 | 0.914 | 0.915 | 0.916 | 0.917 | 0.918 | 0.919 | 0.92 | 0.921 | 0.922 | 0.923 | 0.924 | 0.925 | 0.926 | 0.927 | 0.928 | 0.929 | 0.93 | 0.931 | 0.932 | 0.933 | 0.934 | 0.935 | 0.936 | 0.937 | 0.938 | 0.939 | 0.94 | 0.941 | 0.942 | 0.943 | 0.944 | 0.945 | 0.946 | 0.947 | 0.948 | 0.949 | 0.95 | 0.951 | 0.952 | 0.953 | 0.954 | 0.955 | 0.956 | 0.957 | 0.958 | 0.959 | 0.96 | 0.961 | 0.962 | 0.963 | 0.964 | 0.965 | 0.966 | 0.967 | 0.968 | 0.969 | 0.97 | 0.971 | 0.972 | 0.973 | 0.974 | 0.975 | 0.976 | 0.977 | 0.978 | 0.979 | 0.98 | 0.981 | 0.982 | 0.983 | 0.984 | 0.985 | 0.986 | 0.987 | 0.988 | 0.989 | 0.99 | 0.991 | 0.992 | 0.993 | 0.994 | 0.995 | 0.996 | 0.997 | 0.998 | 0.999 | 1 | 1.001 | 1.002 | 1.003 | 1.004 | 1.005 | 1.006 | 1.007 | 1.008 | 1.009 | 1.01 | 1.011 | 1.012 | 1.013 | 1.014 | 1.015 | 1.016 | 1.017 | 1.018 | 1.019 | 1.02 | 1.021 | 1.022 | 1.023 | 1.024 | 1.025 | 1.026 | 1.027 | 1.028 | 1.029 | 1.03 | 1.031 | 1.032 | 1.033 | 1.034 | 1.035 | 1.036 | 1.037 | 1.038 | 1.039 | 1.04 | 1.041 | 1.042 | 1.043 | 1.044 | 1.045 | 1.046 | 1.047 | 1.048 | 1.049 | 1.05 | 1.051 | 1.052 | 1.053 | 1.054 | 1.055 | 1.056 | 1.057 | 1.058 | 1.059 | 1.06 | 1.061 | 1.062 | 1.063 | 1.064 | 1.065 | 1.066 | 1.067 | 1.068 | 1.069 | 1.07 | 1.071 | 1.072 | 1.073 | 1.074 | 1.075 | 1.076 | 1.077 | 1.078 | 1.079 | 1.08 | 1.081 | 1.082 | 1.083 | 1.084 | 1.085 | 1.086 | 1.087 | 1.088 | 1.089 | 1.09 | 1.091 | 1.092 | 1.093 | 1.094 | 1.095 | 1.096 | 1.097 | 1.098 | 1.099 | 1.1 | 1.101 | 1.102 | 1.103 | 1.104 | 1.105 | 1.106 | 1.107 | 1.108 | 1.109 | 1.11 | 1.111 | 1.112 | 1.113 | 1.114 | 1.115 | 1.116 | 1.117 | 1.118 | 1.119 | 1.12 | 1.121 | 1.122 | 1.123 | 1.124 | 1.125 | 1.126 | 1.127 | 1.128 | 1.129 | 1.13 | 1.131 |

Appendix Table 20. Socio-demographic Index values for all estimated GBD 2017 locations, 1980–2017

| Location               | 1980  | 1981  | 1982  | 1983  | 1984  | 1985  | 1986  | 1987  | 1988  | 1989  | 1990  | 1991  | 1992  | 1993  | 1994  | 1995  | 1996  | 1997  | 1998  | 1999  | 2000  | 2001  | 2002  | 2003  | 2004  | 2005  | 2006  | 2007  | 2008  | 2009  | 2010  | 2011  | 2012  | 2013  | 2014  | 2015  | 2016  | 2017  |       |       |
|------------------------|-------|-------|-------|-------|-------|-------|-------|-------|-------|-------|-------|-------|-------|-------|-------|-------|-------|-------|-------|-------|-------|-------|-------|-------|-------|-------|-------|-------|-------|-------|-------|-------|-------|-------|-------|-------|-------|-------|-------|-------|
| Haringey               | 0.701 | 0.709 | 0.716 | 0.721 | 0.725 | 0.73  | 0.734 | 0.738 | 0.744 | 0.749 | 0.755 | 0.761 | 0.766 | 0.773 | 0.778 | 0.782 | 0.785 | 0.788 | 0.792 | 0.798 | 0.804 | 0.809 | 0.813 | 0.815 | 0.818 | 0.821 | 0.823 | 0.825 | 0.828 | 0.829 | 0.832 | 0.835 | 0.84  | 0.845 | 0.848 | 0.851 | 0.852 | 0.854 |       |       |
| Harrow                 | 0.697 | 0.704 | 0.71  | 0.715 | 0.719 | 0.723 | 0.727 | 0.731 | 0.736 | 0.742 | 0.747 | 0.754 | 0.76  | 0.767 | 0.773 | 0.777 | 0.78  | 0.784 | 0.79  | 0.796 | 0.802 | 0.808 | 0.812 | 0.815 | 0.819 | 0.821 | 0.824 | 0.825 | 0.827 | 0.829 | 0.83  | 0.832 | 0.835 | 0.839 | 0.842 | 0.844 | 0.846 | 0.848 |       |       |
| Havering               | 0.677 | 0.684 | 0.69  | 0.694 | 0.697 | 0.7   | 0.703 | 0.705 | 0.71  | 0.715 | 0.719 | 0.725 | 0.731 | 0.737 | 0.743 | 0.747 | 0.75  | 0.754 | 0.759 | 0.765 | 0.77  | 0.775 | 0.78  | 0.783 | 0.786 | 0.789 | 0.792 | 0.794 | 0.797 | 0.8   | 0.802 | 0.805 | 0.809 | 0.814 | 0.817 | 0.82  | 0.823 | 0.824 | 0.824 |       |
| Hillingdon             | 0.731 | 0.739 | 0.746 | 0.751 | 0.755 | 0.759 | 0.763 | 0.766 | 0.771 | 0.776 | 0.781 | 0.787 | 0.794 | 0.801 | 0.807 | 0.811 | 0.815 | 0.818 | 0.822 | 0.828 | 0.832 | 0.836 | 0.84  | 0.843 | 0.845 | 0.846 | 0.848 | 0.85  | 0.852 | 0.854 | 0.857 | 0.862 | 0.867 | 0.872 | 0.876 | 0.879 | 0.881 | 0.882 | 0.882 |       |
| Hounslow               | 0.716 | 0.724 | 0.731 | 0.736 | 0.74  | 0.744 | 0.748 | 0.752 | 0.757 | 0.764 | 0.769 | 0.775 | 0.781 | 0.788 | 0.793 | 0.797 | 0.801 | 0.805 | 0.811 | 0.818 | 0.824 | 0.83  | 0.834 | 0.837 | 0.84  | 0.842 | 0.844 | 0.845 | 0.848 | 0.849 | 0.852 | 0.856 | 0.862 | 0.868 | 0.872 | 0.875 | 0.877 | 0.879 | 0.879 |       |
| Islington              | 0.762 | 0.769 | 0.775 | 0.779 | 0.784 | 0.789 | 0.793 | 0.796 | 0.801 | 0.806 | 0.812 | 0.818 | 0.825 | 0.832 | 0.838 | 0.843 | 0.847 | 0.851 | 0.856 | 0.862 | 0.867 | 0.872 | 0.876 | 0.879 | 0.882 | 0.885 | 0.888 | 0.891 | 0.895 | 0.898 | 0.902 | 0.906 | 0.91  | 0.914 | 0.917 | 0.919 | 0.921 | 0.922 | 0.922 |       |
| Kensington and Chelsea | 0.787 | 0.793 | 0.799 | 0.804 | 0.808 | 0.813 | 0.817 | 0.821 | 0.826 | 0.833 | 0.839 | 0.845 | 0.851 | 0.857 | 0.861 | 0.865 | 0.869 | 0.873 | 0.877 | 0.884 | 0.889 | 0.894 | 0.897 | 0.899 | 0.902 | 0.905 | 0.907 | 0.909 | 0.912 | 0.915 | 0.918 | 0.921 | 0.924 | 0.927 | 0.929 | 0.93  | 0.931 | 0.932 | 0.932 |       |
| Kingston upon Thames   | 0.733 | 0.739 | 0.745 | 0.75  | 0.754 | 0.759 | 0.764 | 0.768 | 0.775 | 0.781 | 0.787 | 0.794 | 0.8   | 0.807 | 0.812 | 0.817 | 0.821 | 0.826 | 0.831 | 0.838 | 0.844 | 0.849 | 0.854 | 0.858 | 0.861 | 0.864 | 0.867 | 0.869 | 0.872 | 0.874 | 0.876 | 0.879 | 0.882 | 0.885 | 0.887 | 0.888 | 0.889 | 0.89  | 0.892 | 0.892 |
| Lambeth                | 0.713 | 0.721 | 0.728 | 0.734 | 0.739 | 0.745 | 0.751 | 0.756 | 0.762 | 0.769 | 0.775 | 0.783 | 0.791 | 0.797 | 0.804 | 0.808 | 0.812 | 0.816 | 0.821 | 0.828 | 0.835 | 0.84  | 0.845 | 0.848 | 0.852 | 0.856 | 0.86  | 0.864 | 0.869 | 0.873 | 0.876 | 0.879 | 0.882 | 0.885 | 0.887 | 0.889 | 0.89  | 0.892 | 0.892 |       |
| Lewisham               | 0.675 | 0.683 | 0.69  | 0.696 | 0.701 | 0.707 | 0.712 | 0.716 | 0.722 | 0.728 | 0.733 | 0.74  | 0.746 | 0.753 | 0.759 | 0.763 | 0.766 | 0.77  | 0.775 | 0.781 | 0.787 | 0.793 | 0.797 | 0.799 | 0.802 | 0.804 | 0.806 | 0.808 | 0.811 | 0.813 | 0.816 | 0.821 | 0.826 | 0.832 | 0.836 | 0.839 | 0.841 | 0.843 | 0.843 |       |
| Merton                 | 0.704 | 0.711 | 0.718 | 0.722 | 0.726 | 0.731 | 0.736 | 0.74  | 0.746 | 0.752 | 0.758 | 0.765 | 0.771 | 0.779 | 0.785 | 0.79  | 0.795 | 0.799 | 0.805 | 0.812 | 0.819 | 0.824 | 0.828 | 0.833 | 0.838 | 0.843 | 0.848 | 0.853 | 0.857 | 0.862 | 0.868 | 0.873 | 0.878 | 0.883 | 0.888 | 0.893 | 0.898 | 0.903 | 0.908 | 0.913 |
| Newham                 | 0.663 | 0.673 | 0.68  | 0.685 | 0.69  | 0.694 | 0.698 | 0.702 | 0.707 | 0.712 | 0.716 | 0.722 | 0.728 | 0.734 | 0.74  | 0.743 | 0.746 | 0.748 | 0.753 | 0.76  | 0.765 | 0.771 | 0.775 | 0.777 | 0.78  | 0.781 | 0.783 | 0.785 | 0.788 | 0.792 | 0.799 | 0.806 | 0.815 | 0.823 | 0.829 | 0.833 | 0.836 | 0.838 | 0.838 |       |
| Redbridge              | 0.68  | 0.688 | 0.694 | 0.698 | 0.702 | 0.706 | 0.71  | 0.713 | 0.718 | 0.723 | 0.728 | 0.733 | 0.739 | 0.746 | 0.751 | 0.756 | 0.76  | 0.768 | 0.774 | 0.78  | 0.785 | 0.789 | 0.791 | 0.794 | 0.796 | 0.798 | 0.801 | 0.803 | 0.805 | 0.807 | 0.811 | 0.816 | 0.821 | 0.825 | 0.827 | 0.83  | 0.831 | 0.831 | 0.831 |       |
| Richmond upon Thames   | 0.743 | 0.749 | 0.755 | 0.76  | 0.764 | 0.768 | 0.773 | 0.777 | 0.782 | 0.789 | 0.794 | 0.801 | 0.807 | 0.813 | 0.819 | 0.824 | 0.827 | 0.832 | 0.837 | 0.844 | 0.85  | 0.856 | 0.86  | 0.864 | 0.867 | 0.87  | 0.872 | 0.874 | 0.876 | 0.878 | 0.88  | 0.883 | 0.887 | 0.891 | 0.895 | 0.897 | 0.9   | 0.902 | 0.902 |       |
| Southwark              | 0.731 | 0.74  | 0.746 | 0.753 | 0.758 | 0.763 | 0.769 | 0.774 | 0.78  | 0.787 | 0.793 | 0.8   | 0.807 | 0.815 | 0.821 | 0.827 | 0.833 | 0.835 | 0.84  | 0.847 | 0.852 | 0.857 | 0.86  | 0.863 | 0.866 | 0.869 | 0.872 | 0.875 | 0.879 | 0.883 | 0.887 | 0.893 | 0.898 | 0.904 | 0.907 | 0.909 | 0.911 | 0.912 | 0.912 | 0.912 |
| Sutton                 | 0.688 | 0.695 | 0.702 | 0.706 | 0.71  | 0.713 | 0.716 | 0.72  | 0.725 | 0.73  | 0.735 | 0.74  | 0.747 | 0.754 | 0.761 | 0.765 | 0.769 | 0.774 | 0.78  | 0.787 | 0.793 | 0.798 | 0.802 | 0.806 | 0.808 | 0.809 | 0.811 | 0.813 | 0.815 | 0.817 | 0.819 | 0.823 | 0.828 | 0.833 | 0.836 | 0.839 | 0.841 | 0.843 | 0.843 |       |
| Tower Hamlets          | 0.708 | 0.717 | 0.724 | 0.729 | 0.734 | 0.739 | 0.745 | 0.749 | 0.755 | 0.761 | 0.766 | 0.773 | 0.78  | 0.788 | 0.795 | 0.801 | 0.805 | 0.81  | 0.817 | 0.825 | 0.832 | 0.839 | 0.844 | 0.848 | 0.852 | 0.857 | 0.861 | 0.866 | 0.871 | 0.876 | 0.881 | 0.886 | 0.891 | 0.896 | 0.9   | 0.902 | 0.904 | 0.905 | 0.905 |       |
| Waltham Forest         | 0.659 | 0.667 | 0.673 | 0.679 | 0.683 | 0.688 | 0.692 | 0.696 | 0.702 | 0.707 | 0.712 | 0.718 | 0.724 | 0.731 | 0.738 | 0.742 | 0.745 | 0.749 | 0.754 | 0.76  | 0.765 | 0.77  | 0.773 | 0.775 | 0.777 | 0.778 | 0.78  | 0.781 | 0.783 | 0.784 | 0.787 | 0.792 | 0.798 | 0.805 | 0.81  | 0.814 | 0.817 | 0.819 | 0.819 |       |
| Wandsworth             | 0.727 | 0.734 | 0.741 | 0.747 | 0.753 | 0.76  | 0.766 | 0.772 | 0.78  | 0.787 | 0.793 | 0.8   | 0.807 | 0.814 | 0.82  | 0.825 | 0.83  | 0.835 | 0.84  | 0.848 | 0.855 | 0.862 | 0.867 | 0.871 | 0.873 | 0.876 | 0.879 | 0.881 | 0.885 | 0.889 | 0.893 | 0.897 | 0.901 | 0.905 | 0.907 | 0.909 | 0.911 | 0.912 | 0.912 | 0.912 |
| Westminster            | 0.791 | 0.797 | 0.802 | 0.806 | 0.808 | 0.811 | 0.814 | 0.817 | 0.821 | 0.826 | 0.831 | 0.837 | 0.843 | 0.849 | 0.854 | 0.858 | 0.863 | 0.867 | 0.87  | 0.875 | 0.881 | 0.885 | 0.889 | 0.891 | 0.893 | 0.895 | 0.898 | 0.901 | 0.903 | 0.905 | 0.907 | 0.91  | 0.913 | 0.916 | 0.92  | 0.922 | 0.924 | 0.925 | 0.927 | 0.927 |
| North East England     | 0.643 | 0.651 | 0.658 | 0.663 | 0.667 | 0.671 | 0.676 | 0.679 | 0.685 | 0.691 | 0.697 | 0.703 | 0.711 | 0.718 | 0.725 | 0.73  | 0.733 | 0.738 | 0.744 | 0.75  | 0.757 | 0.763 | 0.767 | 0.771 | 0.774 | 0.778 | 0.781 | 0.784 | 0.787 | 0.79  | 0.794 | 0.798 | 0.804 | 0.81  | 0.814 | 0.817 | 0.819 | 0.821 | 0.821 | 0.821 |
| County Durham          | 0.637 | 0.645 | 0.652 | 0.658 | 0.662 | 0.667 | 0.671 | 0.674 | 0.679 | 0.685 | 0.69  | 0.696 | 0.703 | 0.71  | 0.717 | 0.721 | 0.725 | 0.73  | 0.735 | 0.742 | 0.748 | 0.754 | 0.758 | 0.762 | 0.765 | 0.767 | 0.77  | 0.772 | 0.776 | 0.778 | 0.782 | 0.786 | 0.792 | 0.798 | 0.802 | 0.806 | 0.808 | 0.81  | 0.81  | 0.81  |
| Darlington             | 0.655 | 0.664 | 0.671 | 0.676 | 0.68  | 0.684 | 0.687 | 0.689 | 0.693 | 0.698 | 0.703 | 0.709 | 0.716 | 0.723 | 0.73  | 0.734 | 0.737 | 0.74  | 0.745 | 0.752 | 0.758 | 0.764 | 0.769 | 0.773 | 0.777 | 0.78  | 0.783 | 0.787 | 0.791 | 0.795 | 0.8   | 0.806 | 0.812 | 0.817 | 0.821 | 0.823 | 0.825 | 0.825 | 0.825 |       |
| Gateshead              | 0.646 | 0.655 | 0.661 | 0.666 | 0.67  | 0.674 | 0.679 | 0.682 | 0.688 | 0.694 | 0.7   | 0.706 | 0.713 | 0.72  | 0.727 | 0.732 | 0.735 | 0.739 | 0.745 | 0.751 | 0.758 | 0.764 | 0.769 | 0.773 | 0.777 | 0.781 | 0.784 | 0.787 | 0.791 | 0.794 | 0.798 | 0.803 | 0.808 | 0.814 | 0.818 | 0.821 | 0.824 | 0.826 | 0.826 | 0.826 |
| Hartlepool             | 0.627 | 0.636 | 0.643 | 0.648 | 0.651 | 0.655 | 0.658 | 0.661 | 0.666 | 0.672 | 0.677 | 0.683 | 0.69  | 0.697 | 0.703 | 0.707 | 0.714 | 0.719 | 0.726 | 0.732 | 0.737 | 0.74  | 0.743 | 0.747 | 0.752 | 0.755 | 0.758 | 0.762 | 0.767 | 0.773 | 0.78  | 0.785 | 0.788 | 0.791 | 0.793 | 0.795 | 0.797 | 0.799 | 0.801 | 0.803 |
| Middlesbrough          | 0.631 | 0.64  | 0.647 | 0.652 | 0.656 | 0.66  | 0.665 | 0.669 | 0.675 | 0.682 | 0.688 | 0.695 | 0.702 | 0.709 | 0.716 | 0.72  | 0.723 | 0.727 | 0.732 | 0.74  | 0.746 | 0.751 | 0.755 | 0.758 | 0.762 | 0.766 | 0.769 | 0.772 | 0.775 | 0.778 | 0.781 | 0.786 | 0.792 | 0.797 | 0.801 | 0.804 | 0.806 | 0.808 | 0.808 | 0.808 |
| Newcastle upon Tyne    | 0.675 | 0.683 | 0.689 | 0.695 | 0.699 | 0.704 | 0.709 | 0.715 | 0.721 | 0.729 | 0.736 | 0.743 | 0.751 | 0.759 | 0.765 | 0.771 | 0.776 | 0.781 | 0.787 | 0.794 | 0.801 | 0.808 | 0.814 | 0.82  | 0.825 | 0.831 | 0.835 | 0.84  | 0.843 | 0.846 | 0.85  | 0.854 | 0.858 | 0.863 | 0.866 | 0.869 | 0.87  | 0.872 | 0.872 | 0.872 |
| North Tyneside         | 0.645 | 0.653 | 0.659 | 0.666 | 0.67  | 0.676 | 0.681 | 0.687 | 0.693 | 0.699 | 0.706 | 0.713 | 0.718 | 0.724 | 0.729 | 0.733 | 0.737 | 0.743 | 0.749 | 0.756 | 0.762 | 0.768 | 0.772 | 0.776 | 0.78  | 0.784 | 0.787 | 0.79  | 0.793 | 0.797 | 0.802 | 0.807 | 0.813 | 0.817 | 0.821 | 0.823 | 0.825 | 0.825 | 0.825 | 0.825 |
| Northumberland         | 0.644 | 0.653 | 0.66  | 0.665 | 0.67  | 0.674 | 0.678 | 0.681 | 0.687 | 0.692 | 0.697 | 0.703 | 0.709 | 0.716 | 0.722 | 0.727 | 0.73  | 0.735 | 0.74  | 0.746 | 0.752 | 0.757 | 0.761 | 0.764 | 0.767 | 0.77  | 0.773 | 0.776 | 0.779 | 0.781 | 0.784 | 0.787 | 0.793 | 0.798 | 0.802 | 0.805 | 0.807 | 0.808 | 0.808 | 0.808 |
| Redcar and Cleveland   | 0.618 | 0.627 | 0.634 | 0.639 | 0.643 | 0.646 | 0.65  | 0.653 | 0.659 | 0.665 | 0.672 | 0.678 | 0.686 | 0.696 | 0.701 | 0.704 | 0.708 | 0.714 | 0.721 | 0.727 | 0.732 | 0.736 | 0.738 | 0.741 |       |       |       |       |       |       |       |       |       |       |       |       |       |       |       |       |

Appendix Table 20. Socio-demographic Index values for all estimated GBD 2017 locations, 1980–2017

| Location                     | 1980  | 1981  | 1982  | 1983  | 1984  | 1985  | 1986  | 1987  | 1988  | 1989  | 1990  | 1991  | 1992  | 1993  | 1994  | 1995  | 1996  | 1997  | 1998  | 1999  | 2000  | 2001  | 2002  | 2003  | 2004  | 2005  | 2006  | 2007  | 2008  | 2009  | 2010  | 2011  | 2012  | 2013  | 2014  | 2015  | 2016  | 2017  |       |
|------------------------------|-------|-------|-------|-------|-------|-------|-------|-------|-------|-------|-------|-------|-------|-------|-------|-------|-------|-------|-------|-------|-------|-------|-------|-------|-------|-------|-------|-------|-------|-------|-------|-------|-------|-------|-------|-------|-------|-------|-------|
| Slough                       | 0.71  | 0.719 | 0.726 | 0.731 | 0.735 | 0.739 | 0.744 | 0.748 | 0.754 | 0.76  | 0.764 | 0.77  | 0.777 | 0.784 | 0.79  | 0.793 | 0.796 | 0.799 | 0.802 | 0.806 | 0.81  | 0.813 | 0.815 | 0.816 | 0.817 | 0.818 | 0.819 | 0.82  | 0.822 | 0.825 | 0.829 | 0.834 | 0.841 | 0.848 | 0.852 | 0.855 | 0.858 | 0.859 |       |
| Southampton                  | 0.702 | 0.709 | 0.715 | 0.72  | 0.724 | 0.728 | 0.732 | 0.736 | 0.741 | 0.747 | 0.752 | 0.758 | 0.765 | 0.772 | 0.779 | 0.784 | 0.789 | 0.794 | 0.8   | 0.805 | 0.81  | 0.815 | 0.819 | 0.823 | 0.826 | 0.829 | 0.831 | 0.834 | 0.836 | 0.837 | 0.839 | 0.842 | 0.845 | 0.849 | 0.852 | 0.855 | 0.856 | 0.858 |       |
| Surrey                       | 0.726 | 0.733 | 0.739 | 0.743 | 0.747 | 0.751 | 0.755 | 0.758 | 0.763 | 0.769 | 0.773 | 0.779 | 0.785 | 0.791 | 0.797 | 0.801 | 0.805 | 0.809 | 0.814 | 0.821 | 0.827 | 0.833 | 0.838 | 0.841 | 0.845 | 0.847 | 0.85  | 0.853 | 0.856 | 0.858 | 0.861 | 0.864 | 0.868 | 0.873 | 0.876 | 0.879 | 0.881 | 0.882 |       |
| West Berkshire               | 0.724 | 0.733 | 0.739 | 0.743 | 0.747 | 0.751 | 0.755 | 0.758 | 0.764 | 0.769 | 0.774 | 0.78  | 0.786 | 0.793 | 0.799 | 0.803 | 0.808 | 0.813 | 0.819 | 0.824 | 0.829 | 0.832 | 0.835 | 0.838 | 0.841 | 0.845 | 0.848 | 0.85  | 0.853 | 0.856 | 0.858 | 0.861 | 0.864 | 0.868 | 0.873 | 0.876 | 0.879 | 0.881 | 0.882 |
| West Sussex                  | 0.692 | 0.7   | 0.706 | 0.711 | 0.715 | 0.719 | 0.722 | 0.725 | 0.73  | 0.735 | 0.74  | 0.745 | 0.751 | 0.757 | 0.763 | 0.767 | 0.77  | 0.773 | 0.777 | 0.783 | 0.788 | 0.793 | 0.796 | 0.799 | 0.802 | 0.804 | 0.807 | 0.809 | 0.812 | 0.814 | 0.818 | 0.822 | 0.827 | 0.833 | 0.837 | 0.84  | 0.842 | 0.843 | 0.844 |
| Windsor and Maidenhead       | 0.713 | 0.738 | 0.744 | 0.748 | 0.752 | 0.756 | 0.761 | 0.764 | 0.769 | 0.774 | 0.778 | 0.783 | 0.789 | 0.795 | 0.8   | 0.805 | 0.808 | 0.811 | 0.816 | 0.823 | 0.829 | 0.835 | 0.839 | 0.847 | 0.851 | 0.854 | 0.857 | 0.86  | 0.863 | 0.866 | 0.87  | 0.874 | 0.88  | 0.883 | 0.887 | 0.888 | 0.889 | 0.89  | 0.891 |
| Wokingham                    | 0.729 | 0.736 | 0.741 | 0.745 | 0.749 | 0.753 | 0.757 | 0.761 | 0.767 | 0.773 | 0.778 | 0.784 | 0.79  | 0.797 | 0.802 | 0.806 | 0.81  | 0.814 | 0.82  | 0.826 | 0.832 | 0.837 | 0.842 | 0.845 | 0.849 | 0.853 | 0.856 | 0.858 | 0.861 | 0.863 | 0.865 | 0.868 | 0.871 | 0.876 | 0.879 | 0.882 | 0.883 | 0.885 |       |
| South West England           | 0.679 | 0.687 | 0.693 | 0.698 | 0.702 | 0.705 | 0.709 | 0.713 | 0.718 | 0.724 | 0.729 | 0.735 | 0.741 | 0.748 | 0.754 | 0.758 | 0.762 | 0.766 | 0.771 | 0.777 | 0.783 | 0.788 | 0.792 | 0.796 | 0.799 | 0.802 | 0.805 | 0.807 | 0.81  | 0.813 | 0.816 | 0.82  | 0.825 | 0.831 | 0.835 | 0.838 | 0.84  | 0.841 | 0.842 |
| Bath and North East Somerset | 0.699 | 0.706 | 0.712 | 0.717 | 0.721 | 0.725 | 0.73  | 0.734 | 0.74  | 0.746 | 0.752 | 0.758 | 0.764 | 0.77  | 0.777 | 0.782 | 0.786 | 0.79  | 0.796 | 0.803 | 0.809 | 0.816 | 0.822 | 0.828 | 0.833 | 0.838 | 0.842 | 0.846 | 0.85  | 0.853 | 0.856 | 0.859 | 0.863 | 0.867 | 0.869 | 0.872 | 0.874 | 0.875 |       |
| Bournemouth                  | 0.681 | 0.688 | 0.694 | 0.698 | 0.703 | 0.708 | 0.713 | 0.718 | 0.724 | 0.73  | 0.736 | 0.743 | 0.75  | 0.757 | 0.763 | 0.768 | 0.773 | 0.778 | 0.784 | 0.79  | 0.797 | 0.803 | 0.808 | 0.812 | 0.816 | 0.821 | 0.824 | 0.828 | 0.831 | 0.834 | 0.836 | 0.839 | 0.843 | 0.848 | 0.851 | 0.853 | 0.856 | 0.858 |       |
| Bristol, City of             | 0.706 | 0.714 | 0.72  | 0.726 | 0.73  | 0.735 | 0.74  | 0.744 | 0.751 | 0.757 | 0.763 | 0.77  | 0.777 | 0.784 | 0.791 | 0.796 | 0.8   | 0.805 | 0.81  | 0.817 | 0.823 | 0.828 | 0.833 | 0.836 | 0.839 | 0.843 | 0.846 | 0.849 | 0.853 | 0.856 | 0.859 | 0.863 | 0.868 | 0.873 | 0.877 | 0.88  | 0.882 | 0.884 |       |
| Cornwall                     | 0.652 | 0.66  | 0.666 | 0.67  | 0.674 | 0.677 | 0.681 | 0.684 | 0.689 | 0.695 | 0.7   | 0.706 | 0.713 | 0.721 | 0.727 | 0.731 | 0.734 | 0.738 | 0.743 | 0.749 | 0.755 | 0.76  | 0.764 | 0.768 | 0.771 | 0.774 | 0.777 | 0.78  | 0.783 | 0.786 | 0.789 | 0.793 | 0.799 | 0.806 | 0.81  | 0.813 | 0.815 | 0.817 |       |
| Devon                        | 0.671 | 0.679 | 0.685 | 0.69  | 0.693 | 0.697 | 0.701 | 0.704 | 0.709 | 0.715 | 0.72  | 0.726 | 0.733 | 0.741 | 0.746 | 0.75  | 0.753 | 0.757 | 0.762 | 0.769 | 0.775 | 0.78  | 0.785 | 0.789 | 0.793 | 0.796 | 0.8   | 0.803 | 0.806 | 0.808 | 0.811 | 0.816 | 0.821 | 0.826 | 0.83  | 0.833 | 0.835 | 0.837 |       |
| Dorset                       | 0.671 | 0.679 | 0.685 | 0.689 | 0.692 | 0.696 | 0.699 | 0.702 | 0.707 | 0.712 | 0.716 | 0.721 | 0.727 | 0.734 | 0.74  | 0.744 | 0.747 | 0.751 | 0.756 | 0.762 | 0.769 | 0.773 | 0.777 | 0.779 | 0.781 | 0.783 | 0.786 | 0.788 | 0.791 | 0.793 | 0.797 | 0.802 | 0.808 | 0.814 | 0.821 | 0.823 | 0.825 |       |       |
| Gloucestershire              | 0.684 | 0.692 | 0.699 | 0.704 | 0.708 | 0.712 | 0.716 | 0.719 | 0.724 | 0.73  | 0.735 | 0.741 | 0.747 | 0.754 | 0.76  | 0.765 | 0.768 | 0.772 | 0.777 | 0.783 | 0.79  | 0.795 | 0.8   | 0.804 | 0.808 | 0.811 | 0.813 | 0.816 | 0.818 | 0.82  | 0.824 | 0.828 | 0.833 | 0.839 | 0.845 | 0.846 | 0.848 | 0.85  |       |
| North Somerset               | 0.663 | 0.671 | 0.677 | 0.682 | 0.687 | 0.691 | 0.694 | 0.698 | 0.704 | 0.71  | 0.714 | 0.72  | 0.727 | 0.733 | 0.739 | 0.743 | 0.746 | 0.75  | 0.755 | 0.76  | 0.766 | 0.771 | 0.776 | 0.78  | 0.783 | 0.786 | 0.789 | 0.792 | 0.795 | 0.798 | 0.801 | 0.806 | 0.813 | 0.819 | 0.824 | 0.827 | 0.83  | 0.832 |       |
| Plymouth                     | 0.666 | 0.674 | 0.681 | 0.687 | 0.692 | 0.697 | 0.702 | 0.706 | 0.713 | 0.719 | 0.724 | 0.73  | 0.737 | 0.744 | 0.75  | 0.754 | 0.758 | 0.762 | 0.767 | 0.772 | 0.778 | 0.783 | 0.787 | 0.79  | 0.793 | 0.796 | 0.799 | 0.802 | 0.805 | 0.807 | 0.81  | 0.814 | 0.819 | 0.825 | 0.829 | 0.832 | 0.834 | 0.836 |       |
| Poole                        | 0.68  | 0.687 | 0.693 | 0.697 | 0.7   | 0.704 | 0.708 | 0.712 | 0.717 | 0.723 | 0.727 | 0.733 | 0.74  | 0.746 | 0.753 | 0.758 | 0.765 | 0.771 | 0.777 | 0.783 | 0.789 | 0.793 | 0.796 | 0.798 | 0.801 | 0.804 | 0.806 | 0.809 | 0.811 | 0.814 | 0.818 | 0.824 | 0.83  | 0.835 | 0.838 | 0.84  | 0.842 |       |       |
| Somerset                     | 0.667 | 0.675 | 0.682 | 0.687 | 0.69  | 0.694 | 0.697 | 0.701 | 0.704 | 0.708 | 0.713 | 0.718 | 0.724 | 0.731 | 0.737 | 0.741 | 0.744 | 0.748 | 0.752 | 0.757 | 0.763 | 0.767 | 0.77  | 0.772 | 0.775 | 0.777 | 0.78  | 0.782 | 0.785 | 0.787 | 0.789 | 0.794 | 0.799 | 0.805 | 0.809 | 0.812 | 0.814 | 0.816 |       |
| South Gloucestershire        | 0.698 | 0.706 | 0.712 | 0.717 | 0.721 | 0.725 | 0.729 | 0.733 | 0.738 | 0.743 | 0.747 | 0.752 | 0.758 | 0.763 | 0.769 | 0.775 | 0.781 | 0.787 | 0.793 | 0.798 | 0.803 | 0.808 | 0.813 | 0.817 | 0.821 | 0.824 | 0.827 | 0.831 | 0.834 | 0.837 | 0.84  | 0.844 | 0.849 | 0.855 | 0.859 | 0.862 | 0.865 | 0.867 |       |
| Swindon                      | 0.695 | 0.703 | 0.71  | 0.715 | 0.719 | 0.723 | 0.727 | 0.73  | 0.736 | 0.742 | 0.747 | 0.753 | 0.76  | 0.767 | 0.773 | 0.776 | 0.778 | 0.781 | 0.786 | 0.792 | 0.797 | 0.801 | 0.805 | 0.806 | 0.807 | 0.809 | 0.811 | 0.813 | 0.815 | 0.818 | 0.82  | 0.825 | 0.831 | 0.837 | 0.841 | 0.844 | 0.846 | 0.847 |       |
| Torbay                       | 0.652 | 0.66  | 0.665 | 0.669 | 0.672 | 0.676 | 0.68  | 0.683 | 0.689 | 0.694 | 0.699 | 0.705 | 0.711 | 0.717 | 0.723 | 0.727 | 0.73  | 0.733 | 0.736 | 0.741 | 0.745 | 0.749 | 0.75  | 0.751 | 0.753 | 0.755 | 0.757 | 0.759 | 0.761 | 0.762 | 0.764 | 0.767 | 0.773 | 0.779 | 0.783 | 0.786 | 0.789 | 0.79  |       |
| Wiltshire                    | 0.677 | 0.686 | 0.693 | 0.698 | 0.702 | 0.706 | 0.71  | 0.713 | 0.718 | 0.722 | 0.726 | 0.731 | 0.737 | 0.743 | 0.749 | 0.753 | 0.756 | 0.759 | 0.763 | 0.769 | 0.775 | 0.78  | 0.784 | 0.786 | 0.789 | 0.791 | 0.793 | 0.795 | 0.797 | 0.799 | 0.803 | 0.808 | 0.813 | 0.819 | 0.823 | 0.826 | 0.828 | 0.829 |       |
| West Midlands                | 0.655 | 0.663 | 0.669 | 0.674 | 0.679 | 0.683 | 0.687 | 0.69  | 0.696 | 0.702 | 0.707 | 0.713 | 0.72  | 0.727 | 0.734 | 0.739 | 0.743 | 0.747 | 0.752 | 0.759 | 0.765 | 0.771 | 0.776 | 0.779 | 0.783 | 0.786 | 0.789 | 0.792 | 0.795 | 0.798 | 0.802 | 0.806 | 0.812 | 0.818 | 0.822 | 0.825 | 0.828 | 0.829 |       |
| Birmingham                   | 0.649 | 0.658 | 0.665 | 0.67  | 0.675 | 0.68  | 0.685 | 0.689 | 0.695 | 0.702 | 0.707 | 0.714 | 0.721 | 0.728 | 0.735 | 0.739 | 0.743 | 0.747 | 0.753 | 0.76  | 0.766 | 0.773 | 0.778 | 0.782 | 0.787 | 0.791 | 0.794 | 0.798 | 0.803 | 0.807 | 0.811 | 0.817 | 0.823 | 0.829 | 0.834 | 0.837 | 0.839 | 0.84  |       |
| Coventry                     | 0.666 | 0.674 | 0.681 | 0.686 | 0.69  | 0.694 | 0.698 | 0.702 | 0.709 | 0.716 | 0.722 | 0.729 | 0.737 | 0.745 | 0.751 | 0.757 | 0.762 | 0.766 | 0.772 | 0.779 | 0.785 | 0.791 | 0.796 | 0.8   | 0.803 | 0.807 | 0.81  | 0.812 | 0.815 | 0.818 | 0.821 | 0.825 | 0.831 | 0.837 | 0.841 | 0.844 | 0.847 | 0.849 |       |
| Dudley                       | 0.642 | 0.65  | 0.656 | 0.661 | 0.665 | 0.669 | 0.673 | 0.677 | 0.682 | 0.688 | 0.692 | 0.698 | 0.704 | 0.711 | 0.716 | 0.721 | 0.724 | 0.728 | 0.733 | 0.739 | 0.746 | 0.751 | 0.756 | 0.759 | 0.762 | 0.765 | 0.767 | 0.77  | 0.772 | 0.774 | 0.776 | 0.779 | 0.784 | 0.789 | 0.793 | 0.795 | 0.797 | 0.799 |       |
| Herefordshire, County of     | 0.659 | 0.667 | 0.674 | 0.68  | 0.685 | 0.688 | 0.691 | 0.695 | 0.701 | 0.706 | 0.712 | 0.719 | 0.726 | 0.733 | 0.738 | 0.742 | 0.747 | 0.752 | 0.759 | 0.766 | 0.771 | 0.776 | 0.779 | 0.783 | 0.786 | 0.789 | 0.792 | 0.795 | 0.798 | 0.801 | 0.806 | 0.812 | 0.818 | 0.822 | 0.825 | 0.827 | 0.828 |       |       |
| Sandwell                     | 0.629 | 0.638 | 0.645 | 0.65  | 0.654 | 0.658 | 0.663 | 0.666 | 0.672 | 0.678 | 0.682 | 0.688 | 0.695 | 0.702 | 0.708 | 0.712 | 0.715 | 0.719 | 0.724 | 0.729 | 0.735 | 0.74  | 0.744 | 0.747 | 0.75  | 0.752 | 0.754 | 0.756 | 0.759 | 0.761 | 0.765 | 0.769 | 0.776 | 0.783 | 0.788 | 0.792 | 0.795 | 0.797 |       |
| Shropshire                   | 0.661 | 0.669 | 0.675 | 0.679 | 0.683 | 0.687 | 0.69  | 0.693 | 0.698 | 0.704 | 0.708 | 0.714 | 0.721 | 0.728 | 0.734 | 0.739 | 0.743 | 0.747 | 0.752 | 0.759 | 0.766 | 0.771 | 0.776 | 0.781 | 0.786 | 0.789 | 0.793 | 0.795 | 0.799 | 0.802 | 0.806 | 0.811 | 0.816 | 0.821 | 0.825 | 0.828 | 0.83  | 0.832 |       |
| Solihull                     | 0.688 | 0.695 | 0.701 | 0.706 | 0.709 | 0.712 | 0.715 | 0.718 | 0.723 | 0.728 | 0.733 | 0.74  | 0.747 | 0.755 | 0.762 | 0.767 | 0.771 | 0.776 | 0.783 | 0.789 | 0.795 | 0.801 | 0.807 |       |       |       |       |       |       |       |       |       |       |       |       |       |       |       |       |

Appendix Table 20. Socio-demographic Index values for all estimated GBD 2017 locations, 1980–2017

| Location                         | 1980  | 1981  | 1982  | 1983  | 1984  | 1985  | 1986  | 1987  | 1988  | 1989  | 1990  | 1991  | 1992  | 1993  | 1994  | 1995  | 1996  | 1997  | 1998  | 1999  | 2000  | 2001  | 2002  | 2003  | 2004  | 2005  | 2006  | 2007  | 2008  | 2009  | 2010  | 2011  | 2012  | 2013  | 2014  | 2015  | 2016  | 2017  |       |       |
|----------------------------------|-------|-------|-------|-------|-------|-------|-------|-------|-------|-------|-------|-------|-------|-------|-------|-------|-------|-------|-------|-------|-------|-------|-------|-------|-------|-------|-------|-------|-------|-------|-------|-------|-------|-------|-------|-------|-------|-------|-------|-------|
| Dominican Republic               | 0.368 | 0.37  | 0.38  | 0.395 | 0.408 | 0.417 | 0.421 | 0.424 | 0.43  | 0.437 | 0.442 | 0.443 | 0.445 | 0.449 | 0.454 | 0.459 | 0.464 | 0.469 | 0.475 | 0.48  | 0.484 | 0.49  | 0.495 | 0.499 | 0.511 | 0.525 | 0.536 | 0.547 | 0.555 | 0.562 | 0.568 | 0.572 | 0.575 | 0.576 | 0.578 | 0.583 | 0.589 | 0.593 |       |       |
| Grenada                          | 0.409 | 0.412 | 0.413 | 0.415 | 0.418 | 0.422 | 0.427 | 0.433 | 0.44  | 0.449 | 0.46  | 0.472 | 0.485 | 0.497 | 0.508 | 0.519 | 0.529 | 0.54  | 0.55  | 0.558 | 0.566 | 0.573 | 0.578 | 0.584 | 0.589 | 0.594 | 0.599 | 0.604 | 0.608 | 0.612 | 0.615 | 0.618 | 0.62  | 0.624 | 0.628 | 0.632 | 0.637 | 0.64  |       |       |
| Guyana                           | 0.441 | 0.443 | 0.444 | 0.443 | 0.441 | 0.439 | 0.439 | 0.44  | 0.44  | 0.44  | 0.442 | 0.446 | 0.45  | 0.454 | 0.458 | 0.465 | 0.472 | 0.481 | 0.489 | 0.497 | 0.503 | 0.51  | 0.516 | 0.521 | 0.526 | 0.53  | 0.533 | 0.537 | 0.542 | 0.547 | 0.552 | 0.557 | 0.563 | 0.568 | 0.573 | 0.576 | 0.58  | 0.584 | 0.588 |       |
| Haiti                            | 0.304 | 0.306 | 0.308 | 0.31  | 0.312 | 0.314 | 0.316 | 0.319 | 0.322 | 0.325 | 0.328 | 0.332 | 0.336 | 0.339 | 0.342 | 0.345 | 0.35  | 0.355 | 0.361 | 0.367 | 0.373 | 0.379 | 0.384 | 0.389 | 0.393 | 0.397 | 0.401 | 0.405 | 0.409 | 0.413 | 0.416 | 0.42  | 0.423 | 0.427 | 0.431 | 0.435 | 0.439 | 0.444 |       |       |
| Jamaica                          | 0.502 | 0.508 | 0.513 | 0.519 | 0.524 | 0.531 | 0.537 | 0.54  | 0.542 | 0.543 | 0.547 | 0.553 | 0.56  | 0.565 | 0.571 | 0.578 | 0.585 | 0.591 | 0.596 | 0.6   | 0.607 | 0.615 | 0.621 | 0.626 | 0.63  | 0.633 | 0.639 | 0.644 | 0.649 | 0.653 | 0.658 | 0.663 | 0.667 | 0.671 | 0.673 | 0.676 | 0.677 | 0.679 |       |       |
| Puerto Rico                      | 0.628 | 0.637 | 0.648 | 0.657 | 0.664 | 0.668 | 0.672 | 0.675 | 0.677 | 0.68  | 0.684 | 0.689 | 0.693 | 0.698 | 0.703 | 0.708 | 0.714 | 0.719 | 0.724 | 0.729 | 0.736 | 0.745 | 0.752 | 0.756 | 0.759 | 0.762 | 0.766 | 0.77  | 0.774 | 0.778 | 0.782 | 0.786 | 0.791 | 0.797 | 0.805 | 0.811 | 0.813 | 0.813 |       |       |
| Saint Lucia                      | 0.432 | 0.436 | 0.44  | 0.445 | 0.451 | 0.461 | 0.471 | 0.482 | 0.491 | 0.5   | 0.509 | 0.516 | 0.524 | 0.532 | 0.54  | 0.549 | 0.558 | 0.566 | 0.573 | 0.58  | 0.585 | 0.589 | 0.593 | 0.598 | 0.603 | 0.606 | 0.609 | 0.613 | 0.618 | 0.623 | 0.628 | 0.633 | 0.636 | 0.64  | 0.643 | 0.646 | 0.65  | 0.653 |       |       |
| Saint Vincent and the Grenadines | 0.379 | 0.385 | 0.395 | 0.407 | 0.419 | 0.43  | 0.44  | 0.448 | 0.455 | 0.46  | 0.465 | 0.472 | 0.479 | 0.486 | 0.492 | 0.499 | 0.506 | 0.512 | 0.518 | 0.524 | 0.53  | 0.537 | 0.543 | 0.549 | 0.553 | 0.557 | 0.561 | 0.566 | 0.571 | 0.575 | 0.579 | 0.584 | 0.588 | 0.593 | 0.597 | 0.601 | 0.605 | 0.608 |       |       |
| Suriname                         | 0.457 | 0.458 | 0.461 | 0.468 | 0.478 | 0.491 | 0.504 | 0.512 | 0.517 | 0.523 | 0.529 | 0.534 | 0.538 | 0.541 | 0.543 | 0.545 | 0.544 | 0.547 | 0.551 | 0.555 | 0.56  | 0.568 | 0.576 | 0.585 | 0.592 | 0.597 | 0.601 | 0.604 | 0.608 | 0.612 | 0.616 | 0.62  | 0.625 | 0.628 | 0.632 | 0.636 | 0.639 | 0.641 |       |       |
| Trinidad and Tobago              | 0.556 | 0.559 | 0.563 | 0.568 | 0.573 | 0.579 | 0.585 | 0.59  | 0.594 | 0.597 | 0.601 | 0.604 | 0.608 | 0.611 | 0.615 | 0.619 | 0.624 | 0.629 | 0.634 | 0.64  | 0.646 | 0.652 | 0.657 | 0.663 | 0.669 | 0.675 | 0.68  | 0.685 | 0.689 | 0.691 | 0.693 | 0.694 | 0.695 | 0.696 | 0.697 | 0.698 | 0.698 | 0.698 |       |       |
| Virgin Islands                   | 0.635 | 0.638 | 0.64  | 0.643 | 0.647 | 0.65  | 0.652 | 0.655 | 0.657 | 0.659 | 0.673 | 0.683 | 0.691 | 0.699 | 0.706 | 0.713 | 0.719 | 0.725 | 0.73  | 0.734 | 0.737 | 0.74  | 0.748 | 0.755 | 0.762 | 0.768 | 0.774 | 0.78  | 0.786 | 0.79  | 0.795 | 0.799 | 0.802 | 0.804 | 0.805 | 0.806 | 0.806 | 0.807 |       |       |
| Central Latin America            | 0.442 | 0.45  | 0.457 | 0.463 | 0.47  | 0.475 | 0.479 | 0.483 | 0.487 | 0.49  | 0.492 | 0.496 | 0.501 | 0.507 | 0.515 | 0.521 | 0.528 | 0.534 | 0.54  | 0.545 | 0.551 | 0.557 | 0.561 | 0.564 | 0.567 | 0.571 | 0.577 | 0.583 | 0.588 | 0.593 | 0.597 | 0.601 | 0.606 | 0.61  | 0.614 | 0.617 | 0.621 | 0.623 |       |       |
| Colombia                         | 0.438 | 0.445 | 0.451 | 0.457 | 0.463 | 0.468 | 0.472 | 0.475 | 0.478 | 0.481 | 0.482 | 0.483 | 0.485 | 0.49  | 0.496 | 0.503 | 0.511 | 0.518 | 0.524 | 0.528 | 0.533 | 0.537 | 0.541 | 0.544 | 0.548 | 0.553 | 0.558 | 0.563 | 0.567 | 0.571 | 0.575 | 0.581 | 0.588 | 0.596 | 0.604 | 0.611 | 0.617 | 0.624 | 0.629 | 0.634 |
| Costa Rica                       | 0.477 | 0.483 | 0.489 | 0.494 | 0.497 | 0.5   | 0.503 | 0.506 | 0.51  | 0.516 | 0.524 | 0.53  | 0.536 | 0.54  | 0.545 | 0.55  | 0.555 | 0.56  | 0.566 | 0.573 | 0.581 | 0.589 | 0.594 | 0.598 | 0.603 | 0.607 | 0.609 | 0.612 | 0.616 | 0.623 | 0.629 | 0.634 | 0.64  | 0.645 | 0.649 | 0.654 | 0.658 | 0.662 |       |       |
| El Salvador                      | 0.363 | 0.37  | 0.377 | 0.383 | 0.388 | 0.392 | 0.395 | 0.397 | 0.4   | 0.402 | 0.406 | 0.409 | 0.413 | 0.418 | 0.424 | 0.431 | 0.44  | 0.449 | 0.459 | 0.47  | 0.481 | 0.491 | 0.5   | 0.508 | 0.515 | 0.523 | 0.531 | 0.539 | 0.545 | 0.55  | 0.556 | 0.561 | 0.567 | 0.573 | 0.578 | 0.584 | 0.589 | 0.593 | 0.594 |       |
| Guatemala                        | 0.263 | 0.266 | 0.274 | 0.282 | 0.287 | 0.293 | 0.303 | 0.31  | 0.318 | 0.326 | 0.338 | 0.353 | 0.363 | 0.371 | 0.381 | 0.397 | 0.411 | 0.42  | 0.427 | 0.433 | 0.44  | 0.449 | 0.458 | 0.465 | 0.47  | 0.476 | 0.482 | 0.489 | 0.496 | 0.501 | 0.507 | 0.513 | 0.517 | 0.521 | 0.525 | 0.528 | 0.531 | 0.534 | 0.537 |       |
| Honduras                         | 0.286 | 0.296 | 0.305 | 0.311 | 0.315 | 0.319 | 0.322 | 0.326 | 0.33  | 0.336 | 0.34  | 0.344 | 0.347 | 0.352 | 0.358 | 0.365 | 0.372 | 0.381 | 0.39  | 0.4   | 0.41  | 0.419 | 0.428 | 0.437 | 0.445 | 0.452 | 0.459 | 0.465 | 0.47  | 0.475 | 0.481 | 0.486 | 0.49  | 0.495 | 0.499 | 0.504 | 0.508 | 0.512 |       |       |
| Mexico                           | 0.456 | 0.463 | 0.47  | 0.477 | 0.483 | 0.489 | 0.494 | 0.499 | 0.504 | 0.509 | 0.513 | 0.517 | 0.521 | 0.529 | 0.537 | 0.543 | 0.549 | 0.555 | 0.561 | 0.566 | 0.572 | 0.577 | 0.581 | 0.586 | 0.59  | 0.595 | 0.598 | 0.602 | 0.606 | 0.608 | 0.611 | 0.613 | 0.616 | 0.619 | 0.622 | 0.624 | 0.626 | 0.628 |       |       |
| Aguaascalientes                  | 0.498 | 0.506 | 0.513 | 0.519 | 0.526 | 0.532 | 0.538 | 0.543 | 0.549 | 0.554 | 0.558 | 0.561 | 0.565 | 0.571 | 0.577 | 0.583 | 0.591 | 0.597 | 0.603 | 0.606 | 0.609 | 0.612 | 0.615 | 0.618 | 0.621 | 0.626 | 0.632 | 0.636 | 0.64  | 0.643 | 0.644 | 0.645 | 0.647 | 0.649 | 0.651 | 0.653 | 0.655 | 0.657 |       |       |
| Baja California                  | 0.514 | 0.523 | 0.531 | 0.538 | 0.545 | 0.551 | 0.557 | 0.563 | 0.569 | 0.575 | 0.572 | 0.575 | 0.579 | 0.582 | 0.585 | 0.589 | 0.594 | 0.599 | 0.604 | 0.608 | 0.611 | 0.615 | 0.618 | 0.621 | 0.626 | 0.632 | 0.636 | 0.64  | 0.643 | 0.644 | 0.645 | 0.646 | 0.647 | 0.649 | 0.651 | 0.653 | 0.654 | 0.656 |       |       |
| Baja California Sur              | 0.504 | 0.512 | 0.521 | 0.528 | 0.535 | 0.542 | 0.549 | 0.555 | 0.56  | 0.565 | 0.569 | 0.573 | 0.577 | 0.582 | 0.586 | 0.589 | 0.593 | 0.598 | 0.602 | 0.605 | 0.609 | 0.612 | 0.614 | 0.617 | 0.621 | 0.624 | 0.628 | 0.633 | 0.637 | 0.641 | 0.644 | 0.647 | 0.649 | 0.652 | 0.654 | 0.656 | 0.657 | 0.659 |       |       |
| Campeche                         | 0.426 | 0.434 | 0.441 | 0.446 | 0.451 | 0.458 | 0.464 | 0.47  | 0.475 | 0.48  | 0.485 | 0.49  | 0.496 | 0.504 | 0.511 | 0.517 | 0.525 | 0.534 | 0.543 | 0.551 | 0.558 | 0.564 | 0.569 | 0.573 | 0.577 | 0.581 | 0.585 | 0.589 | 0.593 | 0.595 | 0.597 | 0.599 | 0.602 | 0.605 | 0.608 | 0.611 | 0.614 | 0.616 |       |       |
| Chiapas                          | 0.367 | 0.372 | 0.377 | 0.38  | 0.384 | 0.388 | 0.391 | 0.394 | 0.397 | 0.4   | 0.403 | 0.407 | 0.413 | 0.422 | 0.43  | 0.436 | 0.444 | 0.452 | 0.459 | 0.465 | 0.47  | 0.475 | 0.48  | 0.484 | 0.489 | 0.494 | 0.498 | 0.503 | 0.508 | 0.512 | 0.514 | 0.517 | 0.52  | 0.522 | 0.525 | 0.528 | 0.531 | 0.533 |       |       |
| Chiuhua                          | 0.477 | 0.487 | 0.497 | 0.505 | 0.513 | 0.52  | 0.528 | 0.534 | 0.538 | 0.543 | 0.546 | 0.549 | 0.552 | 0.555 | 0.558 | 0.559 | 0.562 | 0.566 | 0.57  | 0.574 | 0.577 | 0.581 | 0.585 | 0.589 | 0.594 | 0.599 | 0.604 | 0.61  | 0.615 | 0.619 | 0.622 | 0.625 | 0.628 | 0.63  | 0.633 | 0.635 | 0.637 | 0.639 |       |       |
| Coahuila                         | 0.479 | 0.487 | 0.494 | 0.501 | 0.509 | 0.517 | 0.524 | 0.531 | 0.538 | 0.544 | 0.549 | 0.555 | 0.561 | 0.567 | 0.573 | 0.576 | 0.581 | 0.582 | 0.592 | 0.597 | 0.601 | 0.604 | 0.607 | 0.611 | 0.614 | 0.616 | 0.62  | 0.624 | 0.628 | 0.631 | 0.633 | 0.634 | 0.635 | 0.637 | 0.638 | 0.64  | 0.642 | 0.644 |       |       |
| Colima                           | 0.464 | 0.471 | 0.478 | 0.485 | 0.492 | 0.5   | 0.508 | 0.516 | 0.524 | 0.531 | 0.538 | 0.543 | 0.549 | 0.556 | 0.561 | 0.565 | 0.571 | 0.577 | 0.583 | 0.588 | 0.594 | 0.598 | 0.603 | 0.607 | 0.611 | 0.616 | 0.621 | 0.626 | 0.631 | 0.634 | 0.637 | 0.64  | 0.643 | 0.645 | 0.648 | 0.65  | 0.652 | 0.654 |       |       |
| Mexico City                      | 0.56  | 0.569 | 0.576 | 0.579 | 0.581 | 0.581 | 0.58  | 0.581 | 0.585 | 0.593 | 0.602 | 0.606 | 0.61  | 0.617 | 0.629 | 0.64  | 0.65  | 0.656 | 0.661 | 0.666 | 0.671 | 0.676 | 0.681 | 0.685 | 0.689 | 0.693 | 0.696 | 0.698 | 0.7   | 0.701 | 0.702 | 0.704 | 0.706 | 0.708 | 0.71  | 0.712 | 0.714 | 0.716 |       |       |
| Durango                          | 0.447 | 0.457 | 0.465 | 0.472 | 0.478 | 0.485 | 0.491 | 0.496 | 0.499 | 0.503 | 0.506 | 0.508 | 0.511 | 0.516 | 0.52  | 0.523 | 0.528 | 0.535 | 0.542 | 0.55  | 0.556 | 0.562 | 0.568 | 0.574 | 0.581 | 0.586 | 0.592 | 0.597 | 0.602 | 0.605 | 0.607 | 0.609 | 0.612 | 0.614 | 0.617 | 0.619 | 0.622 | 0.624 |       |       |
| Guajuato                         | 0.419 | 0.424 | 0.43  | 0.436 | 0.442 | 0.451 | 0.459 | 0.468 | 0.477 | 0.486 | 0.494 | 0.499 | 0.504 | 0.511 | 0.519 | 0.527 | 0.534 | 0.541 | 0.546 | 0.551 | 0.558 | 0.565 | 0.571 | 0.575 | 0.579 | 0.583 | 0.587 | 0.591 | 0.595 | 0.598 | 0.601 | 0.604 | 0.607 | 0.611 | 0.614 | 0.616 | 0.619 | 0.621 |       |       |
| Guerrero                         | 0.371 | 0.379 | 0.386 | 0.392 | 0.398 | 0.404 | 0.409 | 0.414 | 0.418 | 0.423 | 0.426 | 0.429 | 0.433 | 0.44  | 0.445 | 0.45  | 0.456 | 0.463 | 0.473 | 0.48  | 0.487 | 0.492 | 0.498 | 0.505 | 0.511 | 0.517 | 0.523 | 0.529 | 0.535 | 0.539 | 0.542 | 0.545 | 0.548 | 0.552 | 0.555 | 0.558 | 0.56  | 0.562 |       |       |
| Hidalgo                          | 0.36  | 0.364 | 0.368 | 0.371 | 0.374 | 0.38  | 0.386 | 0.394 | 0.402 | 0.41  | 0.417 | 0.424 | 0.433 | 0.444 | 0.454 | 0.462 | 0.471 | 0.481 | 0.491 | 0.501 | 0.511 |       |       |       |       |       |       |       |       |       |       |       |       |       |       |       |       |       |       |       |

Appendix Table 20. Socio-demographic Index values for all estimated GBD 2017 locations, 1980–2017

| Location                     | 1980  | 1981  | 1982  | 1983  | 1984  | 1985  | 1986  | 1987  | 1988  | 1989  | 1990  | 1991  | 1992  | 1993  | 1994  | 1995  | 1996  | 1997  | 1998  | 1999  | 2000  | 2001  | 2002  | 2003  | 2004  | 2005  | 2006  | 2007  | 2008  | 2009  | 2010  | 2011  | 2012  | 2013  | 2014  | 2015  | 2016  | 2017  |       |
|------------------------------|-------|-------|-------|-------|-------|-------|-------|-------|-------|-------|-------|-------|-------|-------|-------|-------|-------|-------|-------|-------|-------|-------|-------|-------|-------|-------|-------|-------|-------|-------|-------|-------|-------|-------|-------|-------|-------|-------|-------|
| Paraná                       | 0.447 | 0.455 | 0.463 | 0.47  | 0.476 | 0.482 | 0.489 | 0.495 | 0.501 | 0.507 | 0.513 | 0.519 | 0.525 | 0.532 | 0.539 | 0.548 | 0.556 | 0.564 | 0.572 | 0.578 | 0.585 | 0.591 | 0.597 | 0.603 | 0.609 | 0.615 | 0.622 | 0.628 | 0.634 | 0.64  | 0.646 | 0.652 | 0.658 | 0.664 | 0.67  | 0.675 | 0.679 | 0.682 |       |
| Pernambuco                   | 0.336 | 0.343 | 0.351 | 0.358 | 0.366 | 0.375 | 0.384 | 0.393 | 0.401 | 0.409 | 0.416 | 0.423 | 0.43  | 0.437 | 0.444 | 0.451 | 0.458 | 0.466 | 0.472 | 0.477 | 0.481 | 0.486 | 0.492 | 0.497 | 0.503 | 0.51  | 0.517 | 0.525 | 0.533 | 0.54  | 0.548 | 0.556 | 0.564 | 0.572 | 0.579 | 0.585 | 0.59  | 0.594 |       |
| Piauí                        | 0.229 | 0.297 | 0.304 | 0.311 | 0.318 | 0.326 | 0.334 | 0.342 | 0.35  | 0.358 | 0.365 | 0.372 | 0.379 | 0.386 | 0.393 | 0.4   | 0.408 | 0.415 | 0.42  | 0.425 | 0.429 | 0.434 | 0.439 | 0.444 | 0.45  | 0.457 | 0.465 | 0.473 | 0.482 | 0.491 | 0.5   | 0.51  | 0.518 | 0.527 | 0.535 | 0.542 | 0.548 | 0.552 |       |
| Rio de Janeiro               | 0.529 | 0.534 | 0.539 | 0.543 | 0.547 | 0.551 | 0.556 | 0.561 | 0.567 | 0.572 | 0.576 | 0.581 | 0.585 | 0.59  | 0.595 | 0.601 | 0.608 | 0.614 | 0.619 | 0.624 | 0.628 | 0.632 | 0.637 | 0.641 | 0.645 | 0.65  | 0.655 | 0.66  | 0.665 | 0.67  | 0.675 | 0.681 | 0.686 | 0.692 | 0.697 | 0.702 | 0.706 | 0.709 | 0.712 |
| Rio Grande do Norte          | 0.335 | 0.343 | 0.351 | 0.359 | 0.367 | 0.375 | 0.383 | 0.392 | 0.4   | 0.408 | 0.415 | 0.422 | 0.429 | 0.436 | 0.444 | 0.451 | 0.46  | 0.467 | 0.474 | 0.48  | 0.485 | 0.491 | 0.497 | 0.503 | 0.509 | 0.516 | 0.524 | 0.532 | 0.541 | 0.549 | 0.558 | 0.567 | 0.575 | 0.583 | 0.59  | 0.597 | 0.602 | 0.605 |       |
| Rio Grande do Sul            | 0.488 | 0.493 | 0.498 | 0.502 | 0.507 | 0.513 | 0.519 | 0.526 | 0.532 | 0.538 | 0.543 | 0.549 | 0.555 | 0.562 | 0.567 | 0.574 | 0.581 | 0.587 | 0.593 | 0.598 | 0.603 | 0.608 | 0.614 | 0.619 | 0.624 | 0.63  | 0.635 | 0.641 | 0.647 | 0.653 | 0.659 | 0.665 | 0.67  | 0.676 | 0.681 | 0.686 | 0.69  | 0.693 |       |
| Rondônia                     | 0.337 | 0.343 | 0.35  | 0.357 | 0.365 | 0.374 | 0.384 | 0.394 | 0.404 | 0.414 | 0.423 | 0.433 | 0.441 | 0.45  | 0.458 | 0.467 | 0.475 | 0.484 | 0.491 | 0.497 | 0.502 | 0.508 | 0.515 | 0.521 | 0.528 | 0.535 | 0.543 | 0.551 | 0.559 | 0.567 | 0.575 | 0.584 | 0.592 | 0.599 | 0.606 | 0.613 | 0.618 | 0.622 |       |
| Roraima                      | 0.338 | 0.343 | 0.349 | 0.356 | 0.364 | 0.374 | 0.384 | 0.395 | 0.407 | 0.417 | 0.428 | 0.438 | 0.447 | 0.456 | 0.465 | 0.474 | 0.483 | 0.492 | 0.499 | 0.504 | 0.509 | 0.514 | 0.521 | 0.527 | 0.534 | 0.543 | 0.552 | 0.562 | 0.572 | 0.581 | 0.591 | 0.601 | 0.611 | 0.62  | 0.628 | 0.636 | 0.642 | 0.646 |       |
| Santa Catarina               | 0.473 | 0.481 | 0.488 | 0.494 | 0.5   | 0.507 | 0.514 | 0.521 | 0.528 | 0.535 | 0.541 | 0.548 | 0.554 | 0.56  | 0.567 | 0.574 | 0.582 | 0.589 | 0.595 | 0.601 | 0.606 | 0.612 | 0.618 | 0.623 | 0.629 | 0.635 | 0.641 | 0.647 | 0.653 | 0.659 | 0.665 | 0.672 | 0.678 | 0.684 | 0.69  | 0.695 | 0.699 | 0.702 |       |
| São Paulo                    | 0.494 | 0.5   | 0.505 | 0.51  | 0.516 | 0.522 | 0.529 | 0.537 | 0.544 | 0.551 | 0.558 | 0.565 | 0.572 | 0.579 | 0.587 | 0.595 | 0.603 | 0.611 | 0.618 | 0.624 | 0.63  | 0.636 | 0.641 | 0.646 | 0.652 | 0.657 | 0.663 | 0.669 | 0.674 | 0.68  | 0.685 | 0.691 | 0.697 | 0.703 | 0.708 | 0.713 | 0.717 | 0.72  |       |
| Sergipe                      | 0.343 | 0.351 | 0.358 | 0.365 | 0.373 | 0.381 | 0.39  | 0.399 | 0.408 | 0.417 | 0.425 | 0.433 | 0.441 | 0.448 | 0.456 | 0.464 | 0.473 | 0.481 | 0.488 | 0.494 | 0.5   | 0.506 | 0.512 | 0.518 | 0.524 | 0.531 | 0.538 | 0.546 | 0.554 | 0.562 | 0.57  | 0.578 | 0.586 | 0.594 | 0.601 | 0.607 | 0.612 | 0.616 |       |
| Tocantins                    | 0.304 | 0.313 | 0.322 | 0.33  | 0.34  | 0.349 | 0.36  | 0.37  | 0.379 | 0.388 | 0.396 | 0.404 | 0.412 | 0.42  | 0.428 | 0.436 | 0.445 | 0.453 | 0.46  | 0.466 | 0.471 | 0.477 | 0.484 | 0.491 | 0.498 | 0.507 | 0.517 | 0.527 | 0.537 | 0.547 | 0.558 | 0.568 | 0.577 | 0.586 | 0.594 | 0.601 | 0.607 | 0.611 |       |
| Paraguay                     | 0.404 | 0.41  | 0.416 | 0.423 | 0.431 | 0.44  | 0.449 | 0.457 | 0.463 | 0.47  | 0.475 | 0.48  | 0.485 | 0.491 | 0.497 | 0.504 | 0.512 | 0.519 | 0.525 | 0.532 | 0.538 | 0.544 | 0.548 | 0.553 | 0.558 | 0.562 | 0.566 | 0.569 | 0.573 | 0.577 | 0.582 | 0.589 | 0.596 | 0.603 | 0.61  | 0.617 | 0.622 | 0.626 |       |
| North Africa and Middle East | 0.373 | 0.382 | 0.39  | 0.399 | 0.408 | 0.415 | 0.422 | 0.431 | 0.439 | 0.448 | 0.456 | 0.464 | 0.472 | 0.478 | 0.485 | 0.492 | 0.499 | 0.506 | 0.513 | 0.521 | 0.531 | 0.539 | 0.547 | 0.553 | 0.561 | 0.568 | 0.574 | 0.582 | 0.589 | 0.596 | 0.602 | 0.607 | 0.612 | 0.617 | 0.622 | 0.628 | 0.635 | 0.639 |       |
| North Africa and Middle East | 0.713 | 0.782 | 0.79  | 0.799 | 0.808 | 0.815 | 0.822 | 0.831 | 0.839 | 0.848 | 0.856 | 0.864 | 0.872 | 0.878 | 0.885 | 0.892 | 0.899 | 0.906 | 0.913 | 0.921 | 0.931 | 0.939 | 0.947 | 0.953 | 0.961 | 0.968 | 0.974 | 0.982 | 0.989 | 0.996 | 1.002 | 1.007 | 1.012 | 1.017 | 1.022 | 1.028 | 1.035 | 1.039 |       |
| Afghanistan                  | 0.13  | 0.13  | 0.132 | 0.135 | 0.138 | 0.14  | 0.143 | 0.145 | 0.147 | 0.148 | 0.15  | 0.151 | 0.152 | 0.153 | 0.154 | 0.155 | 0.157 | 0.159 | 0.164 | 0.171 | 0.177 | 0.184 | 0.191 | 0.199 | 0.208 | 0.218 | 0.228 | 0.238 | 0.248 | 0.258 | 0.267 | 0.276 | 0.284 | 0.29  | 0.296 | 0.301 | 0.306 |       |       |
| Algeria                      | 0.387 | 0.399 | 0.41  | 0.422 | 0.435 | 0.448 | 0.459 | 0.468 | 0.477 | 0.487 | 0.495 | 0.504 | 0.513 | 0.522 | 0.531 | 0.54  | 0.549 | 0.558 | 0.567 | 0.574 | 0.583 | 0.591 | 0.599 | 0.607 | 0.616 | 0.625 | 0.633 | 0.641 | 0.648 | 0.653 | 0.659 | 0.665 | 0.67  | 0.675 | 0.68  | 0.685 | 0.691 | 0.696 |       |
| Bahrain                      | 0.531 | 0.541 | 0.552 | 0.564 | 0.575 | 0.583 | 0.591 | 0.596 | 0.602 | 0.607 | 0.612 | 0.618 | 0.624 | 0.63  | 0.635 | 0.639 | 0.644 | 0.648 | 0.653 | 0.657 | 0.662 | 0.667 | 0.672 | 0.677 | 0.682 | 0.687 | 0.692 | 0.697 | 0.702 | 0.707 | 0.712 | 0.717 | 0.722 | 0.726 | 0.731 | 0.736 | 0.741 | 0.746 |       |
| Egypt                        | 0.351 | 0.359 | 0.367 | 0.374 | 0.381 | 0.389 | 0.399 | 0.41  | 0.422 | 0.432 | 0.441 | 0.451 | 0.461 | 0.47  | 0.477 | 0.485 | 0.493 | 0.5   | 0.507 | 0.514 | 0.522 | 0.529 | 0.536 | 0.543 | 0.55  | 0.555 | 0.562 | 0.569 | 0.576 | 0.583 | 0.59  | 0.596 | 0.603 | 0.61  | 0.617 | 0.624 | 0.631 | 0.638 |       |
| Iran                         | 0.384 | 0.388 | 0.401 | 0.423 | 0.443 | 0.453 | 0.459 | 0.468 | 0.48  | 0.493 | 0.503 | 0.513 | 0.522 | 0.532 | 0.541 | 0.548 | 0.553 | 0.556 | 0.56  | 0.572 | 0.58  | 0.589 | 0.604 | 0.616 | 0.626 | 0.634 | 0.641 | 0.649 | 0.656 | 0.662 | 0.667 | 0.672 | 0.678 | 0.683 | 0.689 | 0.696 | 0.702 | 0.707 |       |
| Iraq                         | 0.361 | 0.37  | 0.379 | 0.386 | 0.393 | 0.399 | 0.406 | 0.413 | 0.42  | 0.427 | 0.433 | 0.433 | 0.437 | 0.441 | 0.444 | 0.446 | 0.45  | 0.455 | 0.463 | 0.473 | 0.481 | 0.488 | 0.494 | 0.496 | 0.502 | 0.507 | 0.512 | 0.517 | 0.522 | 0.528 | 0.535 | 0.542 | 0.551 | 0.559 | 0.566 | 0.572 | 0.58  | 0.585 |       |
| Jordan                       | 0.446 | 0.463 | 0.477 | 0.49  | 0.503 | 0.515 | 0.526 | 0.535 | 0.542 | 0.547 | 0.552 | 0.556 | 0.561 | 0.566 | 0.57  | 0.574 | 0.578 | 0.584 | 0.589 | 0.594 | 0.597 | 0.6   | 0.603 | 0.607 | 0.612 | 0.616 | 0.621 | 0.626 | 0.633 | 0.643 | 0.653 | 0.662 | 0.671 | 0.679 | 0.685 | 0.69  | 0.694 | 0.697 |       |
| Kuwait                       | 0.517 | 0.531 | 0.546 | 0.562 | 0.579 | 0.593 | 0.603 | 0.618 | 0.634 | 0.649 | 0.656 | 0.651 | 0.662 | 0.637 | 0.633 | 0.632 | 0.638 | 0.651 | 0.665 | 0.674 | 0.681 | 0.683 | 0.685 | 0.687 | 0.693 | 0.701 | 0.711 | 0.721 | 0.73  | 0.737 | 0.743 | 0.748 | 0.754 | 0.762 | 0.769 | 0.776 | 0.781 | 0.786 |       |
| Lebanon                      | 0.407 | 0.419 | 0.429 | 0.439 | 0.452 | 0.466 | 0.48  | 0.494 | 0.505 | 0.512 | 0.519 | 0.528 | 0.536 | 0.544 | 0.552 | 0.56  | 0.569 | 0.578 | 0.588 | 0.597 | 0.604 | 0.611 | 0.618 | 0.626 | 0.635 | 0.643 | 0.65  | 0.658 | 0.667 | 0.676 | 0.686 | 0.694 | 0.702 | 0.711 | 0.717 | 0.722 | 0.726 | 0.731 |       |
| Libya                        | 0.545 | 0.563 | 0.58  | 0.594 | 0.604 | 0.611 | 0.616 | 0.622 | 0.628 | 0.636 | 0.645 | 0.657 | 0.669 | 0.679 | 0.688 | 0.696 | 0.705 | 0.713 | 0.72  | 0.725 | 0.729 | 0.732 | 0.736 | 0.742 | 0.747 | 0.753 | 0.759 | 0.765 | 0.771 | 0.777 | 0.783 | 0.788 | 0.793 | 0.798 | 0.803 | 0.808 | 0.813 |       |       |
| Morocco                      | 0.304 | 0.312 | 0.321 | 0.329 | 0.338 | 0.346 | 0.355 | 0.364 | 0.373 | 0.381 | 0.389 | 0.397 | 0.404 | 0.411 | 0.419 | 0.426 | 0.434 | 0.442 | 0.449 | 0.456 | 0.463 | 0.47  | 0.477 | 0.484 | 0.49  | 0.496 | 0.503 | 0.51  | 0.517 | 0.525 | 0.532 | 0.54  | 0.547 | 0.554 | 0.561 | 0.567 | 0.574 | 0.579 |       |
| Palestine                    | 0.312 | 0.32  | 0.326 | 0.332 | 0.338 | 0.343 | 0.348 | 0.352 | 0.355 | 0.358 | 0.362 | 0.366 | 0.371 | 0.374 | 0.384 | 0.39  | 0.397 | 0.405 | 0.413 | 0.421 | 0.427 | 0.431 | 0.433 | 0.435 | 0.439 | 0.444 | 0.448 | 0.453 | 0.46  | 0.468 | 0.474 | 0.481 | 0.489 | 0.496 | 0.503 | 0.513 | 0.521 | 0.528 | 0.536 |
| Oman                         | 0.358 | 0.367 | 0.378 | 0.39  | 0.403 | 0.416 | 0.428 | 0.439 | 0.45  | 0.462 | 0.473 | 0.485 | 0.497 | 0.509 | 0.521 | 0.533 | 0.546 | 0.558 | 0.57  | 0.582 | 0.594 | 0.606 | 0.618 | 0.629 | 0.639 | 0.649 | 0.659 | 0.668 | 0.678 | 0.686 | 0.695 | 0.703 | 0.711 | 0.72  | 0.727 | 0.734 | 0.739 | 0.744 |       |
| Qatar                        | 0.534 | 0.54  | 0.545 | 0.548 | 0.551 | 0.556 | 0.563 | 0.571 | 0.58  | 0.591 | 0.603 | 0.615 | 0.626 | 0.637 | 0.647 | 0.656 | 0.665 | 0.674 | 0.681 | 0.688 | 0.695 | 0.701 | 0.706 | 0.712 | 0.717 | 0.721 | 0.725 | 0.728 | 0.731 | 0.735 | 0.738 | 0.743 | 0.747 | 0.751 | 0.755 | 0.759 | 0.762 | 0.766 |       |
| Saudi Arabia                 | 0.28  | 0.285 | 0.292 | 0.303 | 0.318 | 0.334 | 0.352 | 0.371 | 0.393 | 0.415 | 0.436 | 0.457 | 0.477 | 0.497 | 0.514 | 0.53  | 0.55  | 0.573 | 0.596 | 0.61  | 0.621 | 0.633 | 0.645 | 0.658 | 0.67  | 0.682 | 0.695 | 0.706 | 0.716 | 0.728 | 0.738 | 0.748 | 0.757 | 0.765 | 0.773 | 0.779 | 0.786 |       |       |
| Sudan                        | 0.174 | 0.179 | 0.184 | 0.188 | 0.192 | 0.197 | 0.201 | 0.205 | 0.21  | 0.215 | 0.221 | 0.228 | 0.236 | 0.244 | 0.252 | 0.26  | 0.267 | 0.275 | 0.283 | 0.291 | 0.3   | 0.308 | 0.317 | 0.326 | 0.336 | 0.346 | 0.    |       |       |       |       |       |       |       |       |       |       |       |       |

Appendix Table 20. Socio-demographic Index values for all estimated GBD 2017 locations, 1980–2017

| Location                               | 1980  | 1981  | 1982  | 1983  | 1984  | 1985  | 1986  | 1987  | 1988  | 1989  | 1990  | 1991  | 1992  | 1993  | 1994  | 1995  | 1996  | 1997  | 1998  | 1999  | 2000  | 2001  | 2002  | 2003  | 2004  | 2005  | 2006  | 2007  | 2008  | 2009  | 2010  | 2011  | 2012  | 2013  | 2014  | 2015  | 2016  | 2017  |       |       |
|----------------------------------------|-------|-------|-------|-------|-------|-------|-------|-------|-------|-------|-------|-------|-------|-------|-------|-------|-------|-------|-------|-------|-------|-------|-------|-------|-------|-------|-------|-------|-------|-------|-------|-------|-------|-------|-------|-------|-------|-------|-------|-------|
| West Bengal                            | 0.283 | 0.287 | 0.292 | 0.296 | 0.301 | 0.307 | 0.314 | 0.319 | 0.321 | 0.322 | 0.321 | 0.322 | 0.329 | 0.338 | 0.345 | 0.353 | 0.36  | 0.366 | 0.371 | 0.38  | 0.389 | 0.398 | 0.406 | 0.416 | 0.425 | 0.434 | 0.441 | 0.448 | 0.455 | 0.462 | 0.467 | 0.471 | 0.476 | 0.49  | 0.506 | 0.519 | 0.53  | 0.538 |       |       |
| Union Territories other than Delhi     | 0.376 | 0.378 | 0.381 | 0.385 | 0.389 | 0.392 | 0.396 | 0.399 | 0.402 | 0.404 | 0.406 | 0.408 | 0.412 | 0.417 | 0.423 | 0.43  | 0.439 | 0.446 | 0.453 | 0.463 | 0.474 | 0.486 | 0.498 | 0.511 | 0.524 | 0.537 | 0.548 | 0.559 | 0.569 | 0.579 | 0.586 | 0.591 | 0.597 | 0.61  | 0.624 | 0.636 | 0.646 | 0.653 |       |       |
| Nepal                                  | 0.179 | 0.181 | 0.184 | 0.187 | 0.189 | 0.192 | 0.196 | 0.201 | 0.206 | 0.211 | 0.216 | 0.222 | 0.228 | 0.235 | 0.242 | 0.249 | 0.257 | 0.265 | 0.273 | 0.281 | 0.29  | 0.298 | 0.307 | 0.315 | 0.323 | 0.331 | 0.339 | 0.347 | 0.355 | 0.364 | 0.373 | 0.382 | 0.39  | 0.399 | 0.407 | 0.415 | 0.422 | 0.429 |       |       |
| Pakistan                               | 0.275 | 0.276 | 0.279 | 0.282 | 0.285 | 0.289 | 0.293 | 0.295 | 0.299 | 0.302 | 0.305 | 0.31  | 0.314 | 0.319 | 0.324 | 0.33  | 0.337 | 0.343 | 0.35  | 0.359 | 0.367 | 0.375 | 0.382 | 0.389 | 0.396 | 0.404 | 0.412 | 0.42  | 0.428 | 0.436 | 0.443 | 0.449 | 0.458 | 0.467 | 0.48  | 0.486 | 0.492 | 0.499 |       |       |
| Southeast Asia, East Asia, and Oceania | 0.339 | 0.339 | 0.341 | 0.345 | 0.349 | 0.353 | 0.357 | 0.361 | 0.365 | 0.369 | 0.373 | 0.377 | 0.381 | 0.385 | 0.389 | 0.393 | 0.397 | 0.401 | 0.405 | 0.409 | 0.413 | 0.417 | 0.421 | 0.425 | 0.429 | 0.433 | 0.437 | 0.441 | 0.445 | 0.449 | 0.453 | 0.457 | 0.461 | 0.465 | 0.469 | 0.473 | 0.477 | 0.481 | 0.485 |       |
| East Asia                              | 0.379 | 0.386 | 0.392 | 0.397 | 0.404 | 0.412 | 0.424 | 0.434 | 0.446 | 0.456 | 0.468 | 0.479 | 0.489 | 0.498 | 0.506 | 0.517 | 0.528 | 0.538 | 0.546 | 0.553 | 0.561 | 0.568 | 0.574 | 0.581 | 0.588 | 0.596 | 0.606 | 0.615 | 0.624 | 0.632 | 0.641 | 0.649 | 0.656 | 0.662 | 0.67  | 0.673 | 0.675 | 0.685 |       |       |
| China                                  | 0.37  | 0.377 | 0.38  | 0.383 | 0.389 | 0.396 | 0.404 | 0.417 | 0.431 | 0.443 | 0.456 | 0.469 | 0.479 | 0.489 | 0.498 | 0.51  | 0.523 | 0.535 | 0.545 | 0.554 | 0.563 | 0.573 | 0.58  | 0.587 | 0.595 | 0.606 | 0.618 | 0.63  | 0.64  | 0.65  | 0.661 | 0.671 | 0.678 | 0.683 | 0.693 | 0.695 | 0.694 | 0.707 |       |       |
| North Korea                            | 0.47  | 0.474 | 0.478 | 0.482 | 0.486 | 0.49  | 0.494 | 0.498 | 0.503 | 0.507 | 0.512 | 0.517 | 0.52  | 0.524 | 0.524 | 0.522 | 0.519 | 0.515 | 0.51  | 0.506 | 0.503 | 0.5   | 0.498 | 0.498 | 0.499 | 0.501 | 0.503 | 0.506 | 0.508 | 0.511 | 0.514 | 0.517 | 0.52  | 0.524 | 0.527 | 0.531 | 0.535 | 0.538 |       |       |
| Taiwan (Province of China)             | 0.577 | 0.588 | 0.601 | 0.613 | 0.627 | 0.643 | 0.655 | 0.663 | 0.672 | 0.682 | 0.691 | 0.7   | 0.708 | 0.715 | 0.723 | 0.731 | 0.739 | 0.75  | 0.759 | 0.764 | 0.77  | 0.778 | 0.786 | 0.793 | 0.8   | 0.807 | 0.813 | 0.821 | 0.827 | 0.833 | 0.838 | 0.842 | 0.846 | 0.85  | 0.854 | 0.858 | 0.861 | 0.864 |       |       |
| Oceania                                | 0.374 | 0.377 | 0.38  | 0.384 | 0.387 | 0.39  | 0.393 | 0.397 | 0.4   | 0.403 | 0.406 | 0.408 | 0.41  | 0.412 | 0.415 | 0.418 | 0.421 | 0.423 | 0.426 | 0.428 | 0.43  | 0.431 | 0.432 | 0.433 | 0.435 | 0.436 | 0.438 | 0.44  | 0.442 | 0.444 | 0.446 | 0.449 | 0.452 | 0.455 | 0.459 | 0.463 | 0.467 | 0.471 |       |       |
| American Samoa                         | 0.6   | 0.6   | 0.599 | 0.597 | 0.597 | 0.599 | 0.601 | 0.604 | 0.607 | 0.609 | 0.612 | 0.615 | 0.62  | 0.624 | 0.629 | 0.633 | 0.636 | 0.639 | 0.643 | 0.647 | 0.651 | 0.655 | 0.659 | 0.662 | 0.666 | 0.668 | 0.671 | 0.673 | 0.675 | 0.678 | 0.682 | 0.687 | 0.691 | 0.694 | 0.697 | 0.7   | 0.702 | 0.707 |       |       |
| Federated States of Micronesia         | 0.395 | 0.402 | 0.408 | 0.415 | 0.422 | 0.429 | 0.436 | 0.443 | 0.449 | 0.456 | 0.462 | 0.469 | 0.476 | 0.483 | 0.489 | 0.496 | 0.501 | 0.505 | 0.509 | 0.514 | 0.518 | 0.523 | 0.527 | 0.532 | 0.536 | 0.54  | 0.543 | 0.547 | 0.549 | 0.552 | 0.555 | 0.559 | 0.562 | 0.565 | 0.567 | 0.57  | 0.573 | 0.575 |       |       |
| Fiji                                   | 0.491 | 0.495 | 0.499 | 0.503 | 0.507 | 0.511 | 0.516 | 0.52  | 0.525 | 0.529 | 0.533 | 0.537 | 0.542 | 0.547 | 0.552 | 0.558 | 0.563 | 0.568 | 0.574 | 0.58  | 0.585 | 0.589 | 0.594 | 0.598 | 0.602 | 0.604 | 0.607 | 0.61  | 0.611 | 0.613 | 0.615 | 0.617 | 0.619 | 0.622 | 0.623 | 0.627 | 0.632 | 0.637 | 0.641 |       |
| Guam                                   | 0.707 | 0.708 | 0.709 | 0.71  | 0.71  | 0.71  | 0.71  | 0.708 | 0.706 | 0.702 | 0.698 | 0.695 | 0.693 | 0.694 | 0.698 | 0.703 | 0.709 | 0.717 | 0.727 | 0.739 | 0.75  | 0.759 | 0.765 | 0.768 | 0.77  | 0.77  | 0.769 | 0.77  | 0.771 | 0.774 | 0.776 | 0.778 | 0.784 | 0.788 | 0.792 | 0.794 | 0.794 | 0.794 |       |       |
| Kiribati                               | 0.354 | 0.354 | 0.353 | 0.352 | 0.352 | 0.351 | 0.351 | 0.351 | 0.352 | 0.354 | 0.355 | 0.357 | 0.359 | 0.361 | 0.363 | 0.365 | 0.368 | 0.37  | 0.373 | 0.376 | 0.379 | 0.382 | 0.385 | 0.388 | 0.39  | 0.393 | 0.395 | 0.397 | 0.398 | 0.399 | 0.401 | 0.403 | 0.406 | 0.41  | 0.414 | 0.418 | 0.423 | 0.427 |       |       |
| Marshall Islands                       | 0.337 | 0.345 | 0.35  | 0.355 | 0.361 | 0.366 | 0.373 | 0.384 | 0.394 | 0.403 | 0.413 | 0.421 | 0.429 | 0.436 | 0.444 | 0.451 | 0.457 | 0.462 | 0.465 | 0.469 | 0.473 | 0.477 | 0.482 | 0.485 | 0.489 | 0.493 | 0.497 | 0.502 | 0.512 | 0.518 | 0.523 | 0.528 | 0.533 | 0.538 | 0.543 | 0.548 | 0.552 | 0.557 | 0.561 |       |
| Northern Mariana Islands               | 0.664 | 0.671 | 0.678 | 0.686 | 0.695 | 0.704 | 0.713 | 0.721 | 0.728 | 0.734 | 0.738 | 0.744 | 0.748 | 0.75  | 0.752 | 0.754 | 0.756 | 0.757 | 0.758 | 0.759 | 0.763 | 0.766 | 0.767 | 0.767 | 0.767 | 0.766 | 0.765 | 0.764 | 0.763 | 0.761 | 0.759 | 0.758 | 0.757 | 0.756 | 0.756 | 0.757 | 0.758 | 0.758 | 0.758 |       |
| Papua New Guinea                       | 0.29  | 0.293 | 0.295 | 0.298 | 0.3   | 0.303 | 0.306 | 0.309 | 0.312 | 0.315 | 0.318 | 0.321 | 0.324 | 0.33  | 0.335 | 0.34  | 0.348 | 0.351 | 0.354 | 0.356 | 0.358 | 0.36  | 0.361 | 0.363 | 0.365 | 0.368 | 0.371 | 0.375 | 0.379 | 0.383 | 0.398 | 0.398 | 0.404 | 0.409 | 0.415 | 0.419 | 0.425 | 0.431 |       |       |
| Samoa                                  | 0.499 | 0.503 | 0.507 | 0.51  | 0.514 | 0.518 | 0.522 | 0.527 | 0.531 | 0.535 | 0.538 | 0.539 | 0.538 | 0.536 | 0.535 | 0.536 | 0.536 | 0.537 | 0.538 | 0.54  | 0.542 | 0.544 | 0.546 | 0.548 | 0.55  | 0.552 | 0.554 | 0.556 | 0.558 | 0.559 | 0.561 | 0.563 | 0.564 | 0.565 | 0.566 | 0.567 | 0.572 | 0.576 | 0.579 |       |
| Solomon Islands                        | 0.282 | 0.286 | 0.29  | 0.294 | 0.297 | 0.3   | 0.303 | 0.306 | 0.309 | 0.312 | 0.316 | 0.32  | 0.326 | 0.331 | 0.337 | 0.344 | 0.35  | 0.355 | 0.36  | 0.364 | 0.365 | 0.366 | 0.366 | 0.366 | 0.366 | 0.367 | 0.369 | 0.371 | 0.375 | 0.38  | 0.384 | 0.388 | 0.394 | 0.4   | 0.406 | 0.411 | 0.416 | 0.421 | 0.425 |       |
| Tonga                                  | 0.428 | 0.436 | 0.446 | 0.455 | 0.469 | 0.481 | 0.492 | 0.502 | 0.51  | 0.517 | 0.522 | 0.528 | 0.533 | 0.538 | 0.544 | 0.549 | 0.553 | 0.557 | 0.56  | 0.564 | 0.566 | 0.569 | 0.573 | 0.577 | 0.581 | 0.584 | 0.587 | 0.589 | 0.592 | 0.595 | 0.599 | 0.603 | 0.607 | 0.61  | 0.614 | 0.617 | 0.621 | 0.625 | 0.629 |       |
| Vanuatu                                | 0.346 | 0.35  | 0.353 | 0.357 | 0.361 | 0.365 | 0.369 | 0.372 | 0.374 | 0.377 | 0.38  | 0.384 | 0.388 | 0.391 | 0.395 | 0.398 | 0.402 | 0.406 | 0.409 | 0.413 | 0.416 | 0.419 | 0.421 | 0.423 | 0.425 | 0.428 | 0.431 | 0.435 | 0.44  | 0.445 | 0.449 | 0.453 | 0.458 | 0.462 | 0.465 | 0.469 | 0.472 | 0.475 |       |       |
| Southeast Asia                         | 0.39  | 0.398 | 0.406 | 0.414 | 0.422 | 0.43  | 0.437 | 0.444 | 0.451 | 0.459 | 0.467 | 0.474 | 0.48  | 0.486 | 0.493 | 0.504 | 0.513 | 0.521 | 0.529 | 0.534 | 0.538 | 0.542 | 0.545 | 0.548 | 0.552 | 0.556 | 0.562 | 0.567 | 0.572 | 0.578 | 0.584 | 0.589 | 0.595 | 0.602 | 0.609 | 0.616 | 0.622 | 0.629 | 0.635 | 0.641 |
| Cambodia                               | 0.213 | 0.216 | 0.218 | 0.222 | 0.226 | 0.23  | 0.235 | 0.24  | 0.246 | 0.253 | 0.259 | 0.266 | 0.273 | 0.279 | 0.286 | 0.294 | 0.302 | 0.31  | 0.317 | 0.326 | 0.335 | 0.344 | 0.353 | 0.362 | 0.372 | 0.382 | 0.392 | 0.401 | 0.411 | 0.42  | 0.427 | 0.435 | 0.443 | 0.451 | 0.459 | 0.467 | 0.475 | 0.482 |       |       |
| Indonesia                              | 0.366 | 0.376 | 0.385 | 0.395 | 0.405 | 0.414 | 0.424 | 0.433 | 0.443 | 0.454 | 0.465 | 0.476 | 0.487 | 0.499 | 0.51  | 0.52  | 0.53  | 0.537 | 0.542 | 0.546 | 0.55  | 0.554 | 0.558 | 0.562 | 0.566 | 0.571 | 0.576 | 0.581 | 0.587 | 0.594 | 0.6   | 0.608 | 0.615 | 0.622 | 0.629 | 0.636 | 0.642 | 0.648 | 0.654 |       |
| Laos                                   | 0.24  | 0.246 | 0.253 | 0.259 | 0.266 | 0.273 | 0.28  | 0.287 | 0.293 | 0.3   | 0.307 | 0.313 | 0.32  | 0.326 | 0.332 | 0.339 | 0.345 | 0.352 | 0.358 | 0.364 | 0.371 | 0.378 | 0.385 | 0.392 | 0.4   | 0.407 | 0.416 | 0.425 | 0.434 | 0.444 | 0.453 | 0.463 | 0.473 | 0.483 | 0.493 | 0.502 | 0.511 | 0.519 | 0.529 |       |
| Malaysia                               | 0.503 | 0.51  | 0.52  | 0.527 | 0.535 | 0.543 | 0.548 | 0.551 | 0.559 | 0.565 | 0.57  | 0.575 | 0.581 | 0.589 | 0.598 | 0.606 | 0.616 | 0.626 | 0.638 | 0.654 | 0.661 | 0.664 | 0.671 | 0.679 | 0.684 | 0.689 | 0.697 | 0.704 | 0.709 | 0.714 | 0.721 | 0.727 | 0.733 | 0.739 | 0.744 | 0.749 | 0.754 | 0.759 | 0.764 |       |
| Maldives                               | 0.285 | 0.292 | 0.3   | 0.306 | 0.314 | 0.325 | 0.337 | 0.349 | 0.361 | 0.373 | 0.386 | 0.399 | 0.412 | 0.424 | 0.435 | 0.446 | 0.46  | 0.477 | 0.493 | 0.507 | 0.518 | 0.528 | 0.537 | 0.545 | 0.554 | 0.56  | 0.567 | 0.575 | 0.584 | 0.593 | 0.602 | 0.611 | 0.62  | 0.629 | 0.636 | 0.643 | 0.65  | 0.655 | 0.661 |       |
| Mauritius                              | 0.481 | 0.495 | 0.507 | 0.517 | 0.525 | 0.532 | 0.538 | 0.542 | 0.544 | 0.547 | 0.554 | 0.561 | 0.568 | 0.576 | 0.585 | 0.595 | 0.603 | 0.609 | 0.613 | 0.616 | 0.621 | 0.627 | 0.633 | 0.639 | 0.646 | 0.651 | 0.657 | 0.663 | 0.669 | 0.675 | 0.68  | 0.687 | 0.694 | 0.701 | 0.708 | 0.713 | 0.717 | 0.72  | 0.727 |       |
| Myanmar                                | 0.271 | 0.277 | 0.284 | 0.292 | 0.3   | 0.307 | 0.314 | 0.323 | 0.326 | 0.33  | 0.333 | 0.337 | 0.341 | 0.347 | 0.353 | 0.36  | 0.367 | 0.375 | 0.383 | 0.392 | 0.402 | 0.412 | 0.423 | 0.434 | 0.446 | 0.458 | 0.47  | 0.481 | 0.492 | 0.501 | 0.51  | 0.518 | 0.527 | 0.535 | 0.542 | 0.549 | 0.556 | 0.562 | 0.568 |       |
| Philippines                            | 0.47  | 0.477 | 0.484 | 0.49  | 0.494 | 0.497 | 0.498 | 0.5   | 0.502 | 0.505 |       |       |       |       |       |       |       |       |       |       |       |       |       |       |       |       |       |       |       |       |       |       |       |       |       |       |       |       |       |       |

Appendix Table 20. Socio-demographic Index values for all estimated GBD 2017 locations, 1980–2017

| Location      | 1980  | 1981  | 1982  | 1983  | 1984  | 1985  | 1986  | 1987  | 1988  | 1989  | 1990  | 1991  | 1992  | 1993  | 1994  | 1995  | 1996  | 1997  | 1998  | 1999  | 2000  | 2001  | 2002  | 2003  | 2004  | 2005  | 2006  | 2007  | 2008  | 2009  | 2010  | 2011  | 2012  | 2013  | 2014  | 2015  | 2016  | 2017  |       |
|---------------|-------|-------|-------|-------|-------|-------|-------|-------|-------|-------|-------|-------|-------|-------|-------|-------|-------|-------|-------|-------|-------|-------|-------|-------|-------|-------|-------|-------|-------|-------|-------|-------|-------|-------|-------|-------|-------|-------|-------|
| Laukipu       | 0.229 | 0.242 | 0.255 | 0.267 | 0.278 | 0.288 | 0.301 | 0.314 | 0.326 | 0.337 | 0.346 | 0.354 | 0.361 | 0.368 | 0.375 | 0.38  | 0.385 | 0.389 | 0.395 | 0.401 | 0.405 | 0.409 | 0.415 | 0.423 | 0.433 | 0.442 | 0.451 | 0.462 | 0.472 | 0.483 | 0.494 | 0.502 | 0.511 | 0.521 | 0.531 | 0.54  | 0.549 | 0.556 |       |
| Lamu          | 0.196 | 0.209 | 0.22  | 0.23  | 0.238 | 0.246 | 0.255 | 0.267 | 0.278 | 0.287 | 0.295 | 0.303 | 0.312 | 0.321 | 0.328 | 0.334 | 0.338 | 0.343 | 0.347 | 0.352 | 0.355 | 0.356 | 0.359 | 0.364 | 0.369 | 0.373 | 0.378 | 0.384 | 0.39  | 0.397 | 0.405 | 0.411 | 0.417 | 0.425 | 0.434 | 0.441 | 0.448 | 0.453 |       |
| Machakos      | 0.264 | 0.272 | 0.28  | 0.286 | 0.292 | 0.299 | 0.308 | 0.319 | 0.331 | 0.342 | 0.352 | 0.362 | 0.372 | 0.38  | 0.389 | 0.393 | 0.403 | 0.411 | 0.418 | 0.426 | 0.431 | 0.435 | 0.44  | 0.444 | 0.449 | 0.452 | 0.456 | 0.461 | 0.465 | 0.471 | 0.476 | 0.482 | 0.487 | 0.493 | 0.5   | 0.507 | 0.512 | 0.518 |       |
| Makueni       | 0.241 | 0.247 | 0.252 | 0.258 | 0.263 | 0.268 | 0.273 | 0.278 | 0.283 | 0.293 | 0.3   | 0.307 | 0.314 | 0.322 | 0.328 | 0.333 | 0.338 | 0.343 | 0.348 | 0.351 | 0.354 | 0.354 | 0.354 | 0.357 | 0.361 | 0.367 | 0.373 | 0.381 | 0.391 | 0.401 | 0.413 | 0.423 | 0.432 | 0.439 | 0.447 | 0.454 | 0.46  | 0.465 | 0.469 |
| Mandera       | 0.052 | 0.055 | 0.057 | 0.058 | 0.057 | 0.055 | 0.061 | 0.073 | 0.086 | 0.096 | 0.102 | 0.109 | 0.118 | 0.126 | 0.135 | 0.142 | 0.149 | 0.156 | 0.164 | 0.172 | 0.178 | 0.181 | 0.187 | 0.194 | 0.201 | 0.206 | 0.212 | 0.218 | 0.224 | 0.231 | 0.238 | 0.244 | 0.251 | 0.251 | 0.271 | 0.28  | 0.288 | 0.295 |       |
| Marsabit      | 0.182 | 0.186 | 0.19  | 0.193 | 0.196 | 0.198 | 0.202 | 0.206 | 0.211 | 0.216 | 0.222 | 0.223 | 0.227 | 0.231 | 0.236 | 0.239 | 0.241 | 0.244 | 0.247 | 0.252 | 0.256 | 0.259 | 0.264 | 0.268 | 0.271 | 0.276 | 0.281 | 0.286 | 0.293 | 0.299 | 0.304 | 0.309 | 0.315 | 0.323 | 0.329 | 0.335 | 0.34  | 0.34  |       |
| Meru          | 0.258 | 0.265 | 0.272 | 0.279 | 0.285 | 0.292 | 0.301 | 0.31  | 0.32  | 0.329 | 0.338 | 0.346 | 0.354 | 0.362 | 0.369 | 0.376 | 0.381 | 0.387 | 0.393 | 0.399 | 0.403 | 0.407 | 0.411 | 0.417 | 0.423 | 0.428 | 0.434 | 0.441 | 0.447 | 0.454 | 0.462 | 0.469 | 0.475 | 0.482 | 0.49  | 0.496 | 0.503 | 0.508 |       |
| Mgori         | 0.162 | 0.168 | 0.173 | 0.175 | 0.175 | 0.177 | 0.184 | 0.197 | 0.21  | 0.221 | 0.229 | 0.237 | 0.246 | 0.255 | 0.262 | 0.267 | 0.27  | 0.274 | 0.279 | 0.285 | 0.287 | 0.286 | 0.289 | 0.296 | 0.303 | 0.307 | 0.315 | 0.325 | 0.333 | 0.344 | 0.355 | 0.364 | 0.372 | 0.383 | 0.395 | 0.404 | 0.412 | 0.419 |       |
| Mombasa       | 0.306 | 0.316 | 0.324 | 0.332 | 0.34  | 0.348 | 0.357 | 0.367 | 0.377 | 0.387 | 0.396 | 0.405 | 0.414 | 0.422 | 0.43  | 0.437 | 0.443 | 0.449 | 0.455 | 0.461 | 0.465 | 0.468 | 0.471 | 0.475 | 0.478 | 0.481 | 0.486 | 0.491 | 0.496 | 0.502 | 0.51  | 0.517 | 0.525 | 0.534 | 0.543 | 0.552 | 0.561 | 0.568 |       |
| Murang'a      | 0.282 | 0.294 | 0.304 | 0.313 | 0.321 | 0.33  | 0.34  | 0.351 | 0.363 | 0.373 | 0.381 | 0.389 | 0.396 | 0.402 | 0.408 | 0.413 | 0.418 | 0.424 | 0.429 | 0.436 | 0.441 | 0.444 | 0.449 | 0.454 | 0.46  | 0.465 | 0.47  | 0.476 | 0.482 | 0.488 | 0.494 | 0.499 | 0.504 | 0.51  | 0.515 | 0.52  | 0.524 | 0.528 |       |
| Nairobi       | 0.413 | 0.423 | 0.432 | 0.44  | 0.448 | 0.455 | 0.463 | 0.473 | 0.482 | 0.491 | 0.499 | 0.506 | 0.513 | 0.519 | 0.525 | 0.53  | 0.534 | 0.539 | 0.544 | 0.549 | 0.553 | 0.556 | 0.56  | 0.566 | 0.572 | 0.577 | 0.585 | 0.593 | 0.602 | 0.611 | 0.619 | 0.627 | 0.634 | 0.643 | 0.652 | 0.66  | 0.667 | 0.674 |       |
| Nakuru        | 0.234 | 0.242 | 0.251 | 0.259 | 0.267 | 0.276 | 0.286 | 0.3   | 0.313 | 0.326 | 0.337 | 0.347 | 0.357 | 0.367 | 0.375 | 0.383 | 0.389 | 0.394 | 0.399 | 0.405 | 0.409 | 0.413 | 0.417 | 0.423 | 0.43  | 0.436 | 0.445 | 0.454 | 0.464 | 0.474 | 0.484 | 0.493 | 0.502 | 0.511 | 0.521 | 0.53  | 0.538 | 0.545 |       |
| Nandi         | 0.184 | 0.196 | 0.21  | 0.224 | 0.236 | 0.249 | 0.264 | 0.281 | 0.297 | 0.311 | 0.323 | 0.333 | 0.344 | 0.354 | 0.362 | 0.369 | 0.375 | 0.381 | 0.388 | 0.394 | 0.399 | 0.402 | 0.406 | 0.412 | 0.418 | 0.422 | 0.428 | 0.435 | 0.441 | 0.449 | 0.456 | 0.462 | 0.468 | 0.475 | 0.483 | 0.49  | 0.496 | 0.501 |       |
| Narek         | 0.069 | 0.07  | 0.071 | 0.072 | 0.101 | 0.121 | 0.144 | 0.169 | 0.191 | 0.206 | 0.217 | 0.225 | 0.234 | 0.242 | 0.25  | 0.255 | 0.259 | 0.264 | 0.272 | 0.28  | 0.284 | 0.285 | 0.289 | 0.297 | 0.305 | 0.31  | 0.318 | 0.326 | 0.333 | 0.342 | 0.35  | 0.356 | 0.362 | 0.371 | 0.381 | 0.389 | 0.396 | 0.402 |       |
| Nyamira       | 0.266 | 0.275 | 0.285 | 0.293 | 0.301 | 0.308 | 0.318 | 0.329 | 0.341 | 0.351 | 0.361 | 0.37  | 0.379 | 0.387 | 0.395 | 0.401 | 0.406 | 0.41  | 0.414 | 0.419 | 0.421 | 0.423 | 0.426 | 0.431 | 0.437 | 0.443 | 0.451 | 0.46  | 0.468 | 0.478 | 0.488 | 0.496 | 0.504 | 0.513 | 0.523 | 0.531 | 0.538 | 0.544 |       |
| Nyandarua     | 0.235 | 0.247 | 0.26  | 0.272 | 0.283 | 0.293 | 0.305 | 0.319 | 0.332 | 0.344 | 0.353 | 0.361 | 0.369 | 0.376 | 0.382 | 0.388 | 0.392 | 0.397 | 0.402 | 0.409 | 0.413 | 0.416 | 0.421 | 0.428 | 0.434 | 0.442 | 0.449 | 0.458 | 0.466 | 0.475 | 0.484 | 0.491 | 0.498 | 0.506 | 0.514 | 0.521 | 0.528 | 0.534 |       |
| Nyeri         | 0.304 | 0.315 | 0.326 | 0.337 | 0.346 | 0.355 | 0.366 | 0.377 | 0.388 | 0.398 | 0.407 | 0.414 | 0.421 | 0.427 | 0.434 | 0.439 | 0.444 | 0.449 | 0.454 | 0.463 | 0.466 | 0.47  | 0.475 | 0.479 | 0.484 | 0.489 | 0.496 | 0.502 | 0.509 | 0.516 | 0.522 | 0.527 | 0.533 | 0.539 | 0.544 | 0.549 | 0.554 |       |       |
| Samburu       | 0.122 | 0.13  | 0.139 | 0.146 | 0.152 | 0.158 | 0.167 | 0.179 | 0.19  | 0.199 | 0.205 | 0.21  | 0.215 | 0.221 | 0.225 | 0.228 | 0.23  | 0.232 | 0.235 | 0.239 | 0.24  | 0.239 | 0.24  | 0.243 | 0.247 | 0.25  | 0.252 | 0.258 | 0.262 | 0.267 | 0.273 | 0.277 | 0.282 | 0.287 | 0.294 | 0.299 | 0.304 | 0.308 |       |
| Siaya         | 0.15  | 0.156 | 0.162 | 0.167 | 0.172 | 0.177 | 0.183 | 0.196 | 0.208 | 0.218 | 0.227 | 0.236 | 0.246 | 0.255 | 0.265 | 0.272 | 0.279 | 0.287 | 0.294 | 0.303 | 0.309 | 0.313 | 0.318 | 0.326 | 0.334 | 0.34  | 0.349 | 0.359 | 0.368 | 0.379 | 0.39  | 0.4   | 0.409 | 0.421 | 0.432 | 0.443 | 0.452 | 0.46  |       |
| Taita Taveta  | 0.259 | 0.268 | 0.276 | 0.284 | 0.292 | 0.3   | 0.309 | 0.32  | 0.331 | 0.342 | 0.352 | 0.362 | 0.371 | 0.38  | 0.389 | 0.396 | 0.403 | 0.409 | 0.416 | 0.422 | 0.427 | 0.43  | 0.434 | 0.438 | 0.443 | 0.447 | 0.452 | 0.458 | 0.464 | 0.472 | 0.48  | 0.487 | 0.494 | 0.502 | 0.509 | 0.516 | 0.523 | 0.529 |       |
| Tana River    | 0.169 | 0.177 | 0.183 | 0.188 | 0.192 | 0.196 | 0.202 | 0.209 | 0.217 | 0.224 | 0.231 | 0.237 | 0.244 | 0.25  | 0.255 | 0.26  | 0.263 | 0.267 | 0.27  | 0.274 | 0.276 | 0.276 | 0.278 | 0.281 | 0.285 | 0.288 | 0.292 | 0.298 | 0.304 | 0.311 | 0.319 | 0.326 | 0.333 | 0.342 | 0.353 | 0.362 | 0.371 | 0.379 |       |
| Tharaka Nithi | 0.266 | 0.274 | 0.281 | 0.288 | 0.294 | 0.301 | 0.309 | 0.317 | 0.326 | 0.334 | 0.342 | 0.35  | 0.357 | 0.364 | 0.371 | 0.377 | 0.382 | 0.387 | 0.392 | 0.397 | 0.402 | 0.405 | 0.41  | 0.417 | 0.423 | 0.429 | 0.437 | 0.445 | 0.453 | 0.463 | 0.472 | 0.48  | 0.488 | 0.497 | 0.506 | 0.514 | 0.522 | 0.528 |       |
| Trans Nzoia   | 0.206 | 0.215 | 0.224 | 0.233 | 0.242 | 0.252 | 0.265 | 0.28  | 0.295 | 0.308 | 0.318 | 0.328 | 0.337 | 0.346 | 0.353 | 0.359 | 0.363 | 0.368 | 0.373 | 0.38  | 0.384 | 0.388 | 0.392 | 0.399 | 0.406 | 0.411 | 0.418 | 0.426 | 0.433 | 0.441 | 0.448 | 0.454 | 0.46  | 0.468 | 0.477 | 0.484 | 0.491 | 0.496 |       |
| Turkana       | 0.172 | 0.176 | 0.179 | 0.182 | 0.185 | 0.187 | 0.191 | 0.196 | 0.202 | 0.206 | 0.211 | 0.216 | 0.221 | 0.226 | 0.231 | 0.234 | 0.237 | 0.239 | 0.242 | 0.245 | 0.247 | 0.247 | 0.248 | 0.25  | 0.252 | 0.252 | 0.253 | 0.255 | 0.257 | 0.26  | 0.266 | 0.269 | 0.274 | 0.281 | 0.286 | 0.291 | 0.295 | 0.295 |       |
| Uasin Gishu   | 0.239 | 0.25  | 0.263 | 0.275 | 0.286 | 0.296 | 0.309 | 0.324 | 0.339 | 0.352 | 0.363 | 0.373 | 0.382 | 0.391 | 0.399 | 0.405 | 0.41  | 0.421 | 0.428 | 0.433 | 0.436 | 0.441 | 0.447 | 0.453 | 0.458 | 0.465 | 0.472 | 0.48  | 0.488 | 0.496 | 0.503 | 0.51  | 0.517 | 0.526 | 0.533 | 0.539 | 0.545 |       |       |
| Vihiga        | 0.247 | 0.254 | 0.261 | 0.267 | 0.272 | 0.278 | 0.286 | 0.297 | 0.308 | 0.319 | 0.328 | 0.337 | 0.346 | 0.355 | 0.362 | 0.367 | 0.371 | 0.374 | 0.376 | 0.378 | 0.378 | 0.378 | 0.379 | 0.382 | 0.387 | 0.392 | 0.399 | 0.408 | 0.417 | 0.427 | 0.437 | 0.444 | 0.45  | 0.457 | 0.464 | 0.469 | 0.474 | 0.477 |       |
| Wajir         | 0.038 | 0.038 | 0.041 | 0.044 | 0.043 | 0.042 | 0.053 | 0.071 | 0.086 | 0.097 | 0.104 | 0.111 | 0.12  | 0.128 | 0.136 | 0.142 | 0.146 | 0.151 | 0.156 | 0.162 | 0.165 | 0.166 | 0.168 | 0.172 | 0.176 | 0.178 | 0.181 | 0.185 | 0.189 | 0.195 | 0.201 | 0.206 | 0.21  | 0.218 | 0.226 | 0.233 | 0.238 | 0.243 |       |
| West Pokot    | 0.136 | 0.14  | 0.146 | 0.152 | 0.156 | 0.161 | 0.17  | 0.183 | 0.195 | 0.205 | 0.213 | 0.219 | 0.226 | 0.233 | 0.24  | 0.245 | 0.249 | 0.253 | 0.258 | 0.265 | 0.268 | 0.27  | 0.274 | 0.28  | 0.286 | 0.291 | 0.298 | 0.305 | 0.312 | 0.319 | 0.327 | 0.333 | 0.34  | 0.349 | 0.359 | 0.368 | 0.376 | 0.382 |       |
| Madagascar    | 0.212 | 0.219 | 0.226 | 0.233 | 0.238 | 0.244 | 0.249 | 0.253 | 0.257 | 0.26  | 0.262 | 0.264 | 0.265 | 0.265 | 0.265 | 0.266 | 0.268 | 0.27  | 0.272 | 0.274 | 0.278 | 0.282 | 0.286 | 0.291 | 0.294 | 0.295 | 0.295 | 0.298 | 0.3   | 0.303 | 0.303 | 0.306 | 0.31  | 0.315 | 0.321 | 0.326 | 0.331 |       |       |
| Malawi        | 0.156 | 0.16  | 0.164 | 0.169 | 0.174 | 0.18  | 0.184 | 0.189 | 0.192 | 0.196 | 0.199 | 0.202 | 0.204 | 0.206 | 0.208 | 0.212 | 0.221 | 0.225 | 0.23  | 0.234 | 0.238 | 0.244 | 0.249 | 0.256 | 0.262 | 0.27  | 0.279 | 0.288 | 0.296 | 0.303 | 0.313 | 0.32  | 0.327 | 0.333 | 0.339 | 0.345 | 0.349 |       |       |
| Mozambique    | 0.125 | 0.127 | 0.128 | 0.128 | 0.129 | 0.129 | 0.129 | 0.129 | 0.129 | 0.131 | 0.133 | 0.135 | 0.136 | 0.138 | 0.14  | 0.142 | 0.147 | 0.154 | 0.162 | 0.169 | 0.175 | 0.182 | 0.189 | 0.197 | 0.206 | 0.215 | 0     |       |       |       |       |       |       |       |       |       |       |       |       |
